# Supplementary material for: Comparative De Novo and Pan-Genome Analysis of MDR Nosocomial Bacteria Isolated from Hospitals in Jeddah, Saudi Arabia
Source: MDPI journal article supplement (doi:10.3390/microorganisms11102432), 2023-09-28
Supplement: s1 [file Table S1 gene_presence of Pseudomonas_1_absence.xls]

## Sheet: Gene Presence Absence
Gene	Non-unique Gene name	Annotation	No. isolates	No. sequences	Avg sequences per isolate	Genome Fragment	Order within Fragment	Accessory Fragment	Accessory Order with Fragment	QC	Min group size nuc	Max group size nuc	Avg group size nuc	CP021950.1	CP091160.1	HG994850.1	Pseudomonase_1
kdsA		3-deoxy-8-phosphooctulonate synthase	4	5	1.25	1	8554				854	854	854	1c58dc8b1c0b0cb7c89dc05980566ffe_133	dcf007684d8598380507220e605e8e2c_2445	7ef7127a3f11d26e5ed74c78ba404004_5396	Pseudomonase_1_01360 Pseudomonase_1_04708
purU		formyltetrahydrofolate deformylase	4	5	1.25	1	8584				842	842	842	1c58dc8b1c0b0cb7c89dc05980566ffe_197	dcf007684d8598380507220e605e8e2c_2484	7ef7127a3f11d26e5ed74c78ba404004_5357	Pseudomonase_1_01384 Pseudomonase_1_04726
adhE		bifunctional acetaldehyde-CoA/alcohol dehydrogenase	4	5	1.25	1	8592				2675	2675	2675	1c58dc8b1c0b0cb7c89dc05980566ffe_213	dcf007684d8598380507220e605e8e2c_2500	7ef7127a3f11d26e5ed74c78ba404004_5341	Pseudomonase_1_01391 Pseudomonase_1_04733
oppB		oligopeptide ABC transporter permease OppB	4	5	1.25	1	8469				920	920	920	1c58dc8b1c0b0cb7c89dc05980566ffe_221	dcf007684d8598380507220e605e8e2c_2510	7ef7127a3f11d26e5ed74c78ba404004_5333	Pseudomonase_1_01394 Pseudomonase_1_04738
oppF		murein tripeptide/oligopeptide ABC transporter ATP-binding protein OppF	4	5	1.25	1	8466				1004	1004	1004	1c58dc8b1c0b0cb7c89dc05980566ffe_227	dcf007684d8598380507220e605e8e2c_2516	7ef7127a3f11d26e5ed74c78ba404004_5327	Pseudomonase_1_01397 Pseudomonase_1_04741
pheS		phenylalanine--tRNA ligase subunit alpha	4	5	1.25	1	8448				983	983	983	1c58dc8b1c0b0cb7c89dc05980566ffe_266	dcf007684d8598380507220e605e8e2c_3316	7ef7127a3f11d26e5ed74c78ba404004_4521	Pseudomonase_1_01414 Pseudomonase_1_01163
acpP		acyl carrier protein	4	4	1	1	5741				236	236	236	1c58dc8b1c0b0cb7c89dc05980566ffe_2597	dcf007684d8598380507220e605e8e2c_2217	7ef7127a3f11d26e5ed74c78ba404004_5766	Pseudomonase_1_06366
cspE		transcription antiterminator/RNA stability regulator CspE	4	5	1.25	1	10424				209	209	209	1c58dc8b1c0b0cb7c89dc05980566ffe_10543	dcf007684d8598380507220e605e8e2c_3535	7ef7127a3f11d26e5ed74c78ba404004_4302	Pseudomonase_1_01060 Pseudomonase_1_06051
nusG		transcription termination/antitermination protein NusG	4	5	1.25	1	2257				545	545	545	1c58dc8b1c0b0cb7c89dc05980566ffe_6172	dcf007684d8598380507220e605e8e2c_8273	7ef7127a3f11d26e5ed74c78ba404004_9489	Pseudomonase_1_05844 Pseudomonase_1_06152
clpP		ATP-dependent Clp endopeptidase proteolytic subunit ClpP	4	5	1.25	1	114				623	623	623	1c58dc8b1c0b0cb7c89dc05980566ffe_4289	dcf007684d8598380507220e605e8e2c_864	7ef7127a3f11d26e5ed74c78ba404004_7210	Pseudomonase_1_04078 Pseudomonase_1_07031
ribE		6,7-dimethyl-8-ribityllumazine synthase	4	5	1.25	1	82				470	470	470	1c58dc8b1c0b0cb7c89dc05980566ffe_4353	dcf007684d8598380507220e605e8e2c_820	7ef7127a3f11d26e5ed74c78ba404004_7254	Pseudomonase_1_04111 Pseudomonase_1_07009
ompR		two-component system response regulator OmpR	4	5	1.25	1	4386				719	719	719	1c58dc8b1c0b0cb7c89dc05980566ffe_7384	dcf007684d8598380507220e605e8e2c_6986	7ef7127a3f11d26e5ed74c78ba404004_654	Pseudomonase_1_05780 Pseudomonase_1_06205
infA		translation initiation factor IF-1	4	5	1.25	1	5974				218	218	218	1c58dc8b1c0b0cb7c89dc05980566ffe_2940	dcf007684d8598380507220e605e8e2c_1793	7ef7127a3f11d26e5ed74c78ba404004_6142	Pseudomonase_1_02022 Pseudomonase_1_07707
glyQ		glycine--tRNA ligase subunit alpha	4	5	1.25	1	7247				911	911	911	1c58dc8b1c0b0cb7c89dc05980566ffe_7077	dcf007684d8598380507220e605e8e2c_7371	7ef7127a3f11d26e5ed74c78ba404004_315	Pseudomonase_1_05137 Pseudomonase_1_05596
rpoZ		DNA-directed RNA polymerase subunit omega	4	5	1.25	1	7339				275	275	275	1c58dc8b1c0b0cb7c89dc05980566ffe_6925	dcf007684d8598380507220e605e8e2c_7537	7ef7127a3f11d26e5ed74c78ba404004_149	Pseudomonase_1_05062 Pseudomonase_1_05513
ybaB		YbaB/EbfC family nucleoid-associated protein	4	5	1.25	1	180				329	332	330	1c58dc8b1c0b0cb7c89dc05980566ffe_4175	dcf007684d8598380507220e605e8e2c_934	7ef7127a3f11d26e5ed74c78ba404004_7140	Pseudomonase_1_04024 Pseudomonase_1_07064
atpE		F0F1 ATP synthase subunit C	4	5	1.25	1	7049				239	239	239	1c58dc8b1c0b0cb7c89dc05980566ffe_6637	dcf007684d8598380507220e605e8e2c_7755	7ef7127a3f11d26e5ed74c78ba404004_10049	Pseudomonase_1_04919 Pseudomonase_1_05411
glnB		nitrogen regulatory protein P-II	4	5	1.25	1	3265				338	338	338	1c58dc8b1c0b0cb7c89dc05980566ffe_9333	dcf007684d8598380507220e605e8e2c_5213	7ef7127a3f11d26e5ed74c78ba404004_2548	Pseudomonase_1_03230 Pseudomonase_1_09376
csrA		carbon storage regulator CsrA	4	5	1.25	1	3418				185	185	185	1c58dc8b1c0b0cb7c89dc05980566ffe_9056	dcf007684d8598380507220e605e8e2c_5433	7ef7127a3f11d26e5ed74c78ba404004_2374	Pseudomonase_1_02637 Pseudomonase_1_08079
crp		cAMP-activated global transcriptional regulator CRP	4	5	1.25	1	1693				632	632	632	1c58dc8b1c0b0cb7c89dc05980566ffe_7448	dcf007684d8598380507220e605e8e2c_6902	7ef7127a3f11d26e5ed74c78ba404004_738	Pseudomonase_1_05822 Pseudomonase_1_06173
rpmI		50S ribosomal protein L35	4	5	1.25	1	8450				197	197	197	1c58dc8b1c0b0cb7c89dc05980566ffe_259	dcf007684d8598380507220e605e8e2c_3323	7ef7127a3f11d26e5ed74c78ba404004_4514	Pseudomonase_1_01161 Pseudomonase_1_01412
rplK		50S ribosomal protein L11	4	5	1.25	1	2259				428	428	428	1c58dc8b1c0b0cb7c89dc05980566ffe_6170	dcf007684d8598380507220e605e8e2c_8275	7ef7127a3f11d26e5ed74c78ba404004_9487	Pseudomonase_1_05845 Pseudomonase_1_06151
cspA		RNA chaperone/antiterminator CspA	4	5	1.25	1	7243				212	212	212	1c58dc8b1c0b0cb7c89dc05980566ffe_7085	dcf007684d8598380507220e605e8e2c_7363	7ef7127a3f11d26e5ed74c78ba404004_323	Pseudomonase_1_05141 Pseudomonase_1_05600
rplR		50S ribosomal protein L18	4	5	1.25	1	2056				353	353	353	1c58dc8b1c0b0cb7c89dc05980566ffe_7528	dcf007684d8598380507220e605e8e2c_6802	7ef7127a3f11d26e5ed74c78ba404004_846	Pseudomonase_1_09675 Pseudomonase_1_09825
rpmJ		50S ribosomal protein L36	4	5	1.25	1	2051				116	116	116	1c58dc8b1c0b0cb7c89dc05980566ffe_7538	dcf007684d8598380507220e605e8e2c_6792	7ef7127a3f11d26e5ed74c78ba404004_856	Pseudomonase_1_09680 Pseudomonase_1_09830
rho		transcription termination factor Rho	4	4	1	1	2101				1259	1259	1259	1c58dc8b1c0b0cb7c89dc05980566ffe_6337	dcf007684d8598380507220e605e8e2c_7832	7ef7127a3f11d26e5ed74c78ba404004_9954	Pseudomonase_1_07946
rplD		50S ribosomal protein L4	4	5	1.25	1	2071				605	605	605	1c58dc8b1c0b0cb7c89dc05980566ffe_7498	dcf007684d8598380507220e605e8e2c_6826	7ef7127a3f11d26e5ed74c78ba404004_816	Pseudomonase_1_09660 Pseudomonase_1_10042
rplE		50S ribosomal protein L5	4	5	1.25	1	2060				539	539	539	1c58dc8b1c0b0cb7c89dc05980566ffe_7520	dcf007684d8598380507220e605e8e2c_6810	7ef7127a3f11d26e5ed74c78ba404004_838	Pseudomonase_1_09671 Pseudomonase_1_09821
uspA		universal stress protein UspA	4	5	1.25	1	7846				434	437	435	1c58dc8b1c0b0cb7c89dc05980566ffe_7210	dcf007684d8598380507220e605e8e2c_7176	7ef7127a3f11d26e5ed74c78ba404004_464	Pseudomonase_1_05687 Pseudomonase_1_06291
rpsI		30S ribosomal protein S9	4	5	1.25	1	1943				392	392	392	1c58dc8b1c0b0cb7c89dc05980566ffe_7715	dcf007684d8598380507220e605e8e2c_6658	7ef7127a3f11d26e5ed74c78ba404004_1015	Pseudomonase_1_03867 Pseudomonase_1_04550
rpsU		30S ribosomal protein S21	4	5	1.25	1	5029				215	215	215	1c58dc8b1c0b0cb7c89dc05980566ffe_8043	dcf007684d8598380507220e605e8e2c_6338	7ef7127a3f11d26e5ed74c78ba404004_1335	Pseudomonase_1_03713 Pseudomonase_1_04391
rplQ		50S ribosomal protein L17	4	5	1.25	1	2044				383	386	384	1c58dc8b1c0b0cb7c89dc05980566ffe_7548	dcf007684d8598380507220e605e8e2c_6786	7ef7127a3f11d26e5ed74c78ba404004_866	Pseudomonase_1_09685 Pseudomonase_1_09835
rplT		50S ribosomal protein L20	4	5	1.25	1	8449				356	356	356	1c58dc8b1c0b0cb7c89dc05980566ffe_261	dcf007684d8598380507220e605e8e2c_3321	7ef7127a3f11d26e5ed74c78ba404004_4516	Pseudomonase_1_01162 Pseudomonase_1_01413
fis		DNA-binding transcriptional regulator Fis	4	5	1.25	1	1988				296	296	296	1c58dc8b1c0b0cb7c89dc05980566ffe_7649	dcf007684d8598380507220e605e8e2c_6734	7ef7127a3f11d26e5ed74c78ba404004_939	Pseudomonase_1_03905 Pseudomonase_1_04582
rpmB		50S ribosomal protein L28	4	5	1.25	1	7313				236	236	236	1c58dc8b1c0b0cb7c89dc05980566ffe_6963	dcf007684d8598380507220e605e8e2c_7513	7ef7127a3f11d26e5ed74c78ba404004_173	Pseudomonase_1_05081 Pseudomonase_1_05525
mreB		rod shape-determining protein MreB	4	5	1.25	1	1977				1043	1043	1043	1c58dc8b1c0b0cb7c89dc05980566ffe_7673	dcf007684d8598380507220e605e8e2c_6698	7ef7127a3f11d26e5ed74c78ba404004_975	Pseudomonase_1_03887 Pseudomonase_1_04571
rpsL		30S ribosomal protein S12	4	5	1.25	1	1713				374	374	374	1c58dc8b1c0b0cb7c89dc05980566ffe_7480	dcf007684d8598380507220e605e8e2c_6870	7ef7127a3f11d26e5ed74c78ba404004_770	Pseudomonase_1_05839 Pseudomonase_1_06157
rpsR		30S ribosomal protein S18	4	5	1.25	1	6493				227	227	227	1c58dc8b1c0b0cb7c89dc05980566ffe_5684	dcf007684d8598380507220e605e8e2c_8764	7ef7127a3f11d26e5ed74c78ba404004_8984	Pseudomonase_1_00646 Pseudomonase_1_07662
rplW		50S ribosomal protein L23	4	5	1.25	1	2070				302	302	302	1c58dc8b1c0b0cb7c89dc05980566ffe_7500	dcf007684d8598380507220e605e8e2c_6824	7ef7127a3f11d26e5ed74c78ba404004_818	Pseudomonase_1_09661 Pseudomonase_1_10043
lrp		leucine-responsive transcriptional regulator Lrp	4	5	1.25	1	5967				494	494	494	1c58dc8b1c0b0cb7c89dc05980566ffe_2930	dcf007684d8598380507220e605e8e2c_1803	7ef7127a3f11d26e5ed74c78ba404004_6132	Pseudomonase_1_02017 Pseudomonase_1_07702
rpsH		30S ribosomal protein S8	4	5	1.25	1	2058				392	392	392	1c58dc8b1c0b0cb7c89dc05980566ffe_7524	dcf007684d8598380507220e605e8e2c_6806	7ef7127a3f11d26e5ed74c78ba404004_842	Pseudomonase_1_09673 Pseudomonase_1_09823
rplX		50S ribosomal protein L24	4	4	1	1	2061				314	314	314	1c58dc8b1c0b0cb7c89dc05980566ffe_7518	dcf007684d8598380507220e605e8e2c_6812	7ef7127a3f11d26e5ed74c78ba404004_836	Pseudomonase_1_09670
rpsB		30S ribosomal protein S2	4	5	1.25	1	5419				725	725	725	1c58dc8b1c0b0cb7c89dc05980566ffe_4755	dcf007684d8598380507220e605e8e2c_357	7ef7127a3f11d26e5ed74c78ba404004_7940	Pseudomonase_1_05191 Pseudomonase_1_07514
rpsA		30S ribosomal protein S1	4	4	1	1	5909				1673	1673	1673	1c58dc8b1c0b0cb7c89dc05980566ffe_2896	dcf007684d8598380507220e605e8e2c_1841	7ef7127a3f11d26e5ed74c78ba404004_6094	Pseudomonase_1_01998
ihfA		integration host factor subunit alpha	4	5	1.25	1	8446				299	299	299	1c58dc8b1c0b0cb7c89dc05980566ffe_270	dcf007684d8598380507220e605e8e2c_3312	7ef7127a3f11d26e5ed74c78ba404004_4525	Pseudomonase_1_01165 Pseudomonase_1_01416
ftsA		cell division protein FtsA	4	5	1.25	1	10565				1262	1262	1262	1c58dc8b1c0b0cb7c89dc05980566ffe_4936	dcf007684d8598380507220e605e8e2c_195	7ef7127a3f11d26e5ed74c78ba404004_8102	Pseudomonase_1_05267 Pseudomonase_1_07429
rpsT		30S ribosomal protein S20	4	4	1	1	4121				263	263	263	1c58dc8b1c0b0cb7c89dc05980566ffe_5099	dcf007684d8598380507220e605e8e2c_44	7ef7127a3f11d26e5ed74c78ba404004_8253	Pseudomonase_1_05337
ahpC		alkyl hydroperoxide reductase subunit C	4	5	1.25	1	996				563	563	563	1c58dc8b1c0b0cb7c89dc05980566ffe_3597	dcf007684d8598380507220e605e8e2c_1257	7ef7127a3f11d26e5ed74c78ba404004_6931	Pseudomonase_1_02296 Pseudomonase_1_06796
rpsS		30S ribosomal protein S19	4	5	1.25	1	2068				278	278	278	1c58dc8b1c0b0cb7c89dc05980566ffe_7504	dcf007684d8598380507220e605e8e2c_6820	7ef7127a3f11d26e5ed74c78ba404004_822	Pseudomonase_1_09663 Pseudomonase_1_10045
dnaB		replicative DNA helicase	4	5	1.25	1	2592				1415	1415	1415	1c58dc8b1c0b0cb7c89dc05980566ffe_6007	dcf007684d8598380507220e605e8e2c_8421	7ef7127a3f11d26e5ed74c78ba404004_9333	Pseudomonase_1_08389 Pseudomonase_1_08557
rpoS		RNA polymerase sigma factor RpoS	4	5	1.25	1	4160				992	992	992	1c58dc8b1c0b0cb7c89dc05980566ffe_8904	dcf007684d8598380507220e605e8e2c_5549	7ef7127a3f11d26e5ed74c78ba404004_2256	Pseudomonase_1_02563 Pseudomonase_1_09611
clpX		ATP-dependent protease ATP-binding subunit ClpX	4	5	1.25	1	115				1274	1274	1274	1c58dc8b1c0b0cb7c89dc05980566ffe_4287	dcf007684d8598380507220e605e8e2c_866	7ef7127a3f11d26e5ed74c78ba404004_7208	Pseudomonase_1_04077 Pseudomonase_1_07032
group_11119	cspE	transcription antiterminator/RNA stability regulator CspE	4	5	1.25	1	1005				209	209	209	1c58dc8b1c0b0cb7c89dc05980566ffe_3583	dcf007684d8598380507220e605e8e2c_1289	7ef7127a3f11d26e5ed74c78ba404004_6899	Pseudomonase_1_02280 Pseudomonase_1_06803
ispG		flavodoxin-dependent (E)-4-hydroxy-3-methylbut-2-enyl-diphosphate synthase	4	5	1.25	1	3156				1118	1121	1119	1c58dc8b1c0b0cb7c89dc05980566ffe_9397	dcf007684d8598380507220e605e8e2c_5147	7ef7127a3f11d26e5ed74c78ba404004_2791	Pseudomonase_1_00489 Pseudomonase_1_03262
rplB		50S ribosomal protein L2	4	5	1.25	1	2069				821	821	821	1c58dc8b1c0b0cb7c89dc05980566ffe_7502	dcf007684d8598380507220e605e8e2c_6822	7ef7127a3f11d26e5ed74c78ba404004_820	Pseudomonase_1_09662 Pseudomonase_1_10044
ftsZ		cell division protein FtsZ	4	5	1.25	1	10566				1151	1151	1151	1c58dc8b1c0b0cb7c89dc05980566ffe_4934	dcf007684d8598380507220e605e8e2c_197	7ef7127a3f11d26e5ed74c78ba404004_8100	Pseudomonase_1_05266 Pseudomonase_1_07430
ytfK		DUF1107 domain-containing protein	4	5	1.25	1	6470				206	206	206	1c58dc8b1c0b0cb7c89dc05980566ffe_5658	dcf007684d8598380507220e605e8e2c_8808	7ef7127a3f11d26e5ed74c78ba404004_8940	Pseudomonase_1_00668 Pseudomonase_1_07675
dksA		RNA polymerase-binding protein DksA	4	5	1.25	1	10579				455	455	455	1c58dc8b1c0b0cb7c89dc05980566ffe_4835	dcf007684d8598380507220e605e8e2c_309	7ef7127a3f11d26e5ed74c78ba404004_7988	Pseudomonase_1_05213 Pseudomonase_1_07476
ptsH		phosphocarrier protein Hpr	4	5	1.25	1	3018				257	257	257	1c58dc8b1c0b0cb7c89dc05980566ffe_9565	dcf007684d8598380507220e605e8e2c_4981	7ef7127a3f11d26e5ed74c78ba404004_2957	Pseudomonase_1_00407 Pseudomonase_1_03344
pstB		phosphate ABC transporter ATP-binding protein PstB	4	5	1.25	1	7062				773	773	773	1c58dc8b1c0b0cb7c89dc05980566ffe_6661	dcf007684d8598380507220e605e8e2c_7731	7ef7127a3f11d26e5ed74c78ba404004_10073	Pseudomonase_1_04931 Pseudomonase_1_05423
lon		endopeptidase La	4	5	1.25	1	116				2354	2354	2354	1c58dc8b1c0b0cb7c89dc05980566ffe_4285	dcf007684d8598380507220e605e8e2c_868	7ef7127a3f11d26e5ed74c78ba404004_7206	Pseudomonase_1_04076 Pseudomonase_1_07033
trmD		tRNA (guanosine(37)-N1)-methyltransferase TrmD	4	5	1.25	1	3317				767	767	767	1c58dc8b1c0b0cb7c89dc05980566ffe_9220	dcf007684d8598380507220e605e8e2c_5320	7ef7127a3f11d26e5ed74c78ba404004_2484	Pseudomonase_1_02797 Pseudomonase_1_08130
crr		PTS glucose transporter subunit IIA	4	5	1.25	1	3020				509	509	509	1c58dc8b1c0b0cb7c89dc05980566ffe_9561	dcf007684d8598380507220e605e8e2c_4985	7ef7127a3f11d26e5ed74c78ba404004_2953	Pseudomonase_1_00409 Pseudomonase_1_03342
nuoB		NADH-quinone oxidoreductase subunit NuoB	4	5	1.25	1	9571				662	674	666	1c58dc8b1c0b0cb7c89dc05980566ffe_9750	dcf007684d8598380507220e605e8e2c_4666	7ef7127a3f11d26e5ed74c78ba404004_3199	Pseudomonase_1_00291 Pseudomonase_1_03430
speB		agmatinase	4	5	1.25	1	3631				920	920	920	1c58dc8b1c0b0cb7c89dc05980566ffe_8371	dcf007684d8598380507220e605e8e2c_5966	7ef7127a3f11d26e5ed74c78ba404004_1830	Pseudomonase_1_04300 Pseudomonase_1_07231
nuoI		NADH-quinone oxidoreductase subunit NuoI	4	5	1.25	1	9578				542	542	542	1c58dc8b1c0b0cb7c89dc05980566ffe_9762	dcf007684d8598380507220e605e8e2c_4654	7ef7127a3f11d26e5ed74c78ba404004_3211	Pseudomonase_1_00285 Pseudomonase_1_03436
rplS		50S ribosomal protein L19	4	5	1.25	1	3314				347	347	347	1c58dc8b1c0b0cb7c89dc05980566ffe_9222	dcf007684d8598380507220e605e8e2c_5318	7ef7127a3f11d26e5ed74c78ba404004_2486	Pseudomonase_1_02798 Pseudomonase_1_08131
secY		preprotein translocase subunit SecY	4	5	1.25	1	2052				1331	1331	1331	1c58dc8b1c0b0cb7c89dc05980566ffe_7536	dcf007684d8598380507220e605e8e2c_6794	7ef7127a3f11d26e5ed74c78ba404004_854	Pseudomonase_1_09679 Pseudomonase_1_09829
rplJ		50S ribosomal protein L10	4	5	1.25	1	2261				497	497	497	1c58dc8b1c0b0cb7c89dc05980566ffe_6166	dcf007684d8598380507220e605e8e2c_8281	7ef7127a3f11d26e5ed74c78ba404004_9483	Pseudomonase_1_05847 Pseudomonase_1_06149
efp		elongation factor P	4	5	1.25	1	6572				566	566	566	1c58dc8b1c0b0cb7c89dc05980566ffe_5789	dcf007684d8598380507220e605e8e2c_8652	7ef7127a3f11d26e5ed74c78ba404004_9099	Pseudomonase_1_00591 Pseudomonase_1_07611
pyrH		UMP kinase	4	5	1.25	1	5421				725	725	725	1c58dc8b1c0b0cb7c89dc05980566ffe_4751	dcf007684d8598380507220e605e8e2c_361	7ef7127a3f11d26e5ed74c78ba404004_7936	Pseudomonase_1_05189 Pseudomonase_1_07516
yeaG		protein kinase YeaG	4	5	1.25	1	10921				1934	1934	1934	1c58dc8b1c0b0cb7c89dc05980566ffe_2395	dcf007684d8598380507220e605e8e2c_3457	7ef7127a3f11d26e5ed74c78ba404004_4380	Pseudomonase_1_01094 Pseudomonase_1_08772
rpmF		50S ribosomal protein L32	4	4	1	1	5746				173	173	173	1c58dc8b1c0b0cb7c89dc05980566ffe_2607	dcf007684d8598380507220e605e8e2c_2207	7ef7127a3f11d26e5ed74c78ba404004_5776	Pseudomonase_1_06371
sdhA		succinate dehydrogenase flavoprotein subunit	4	5	1.25	1	1101				1766	1766	1766	1c58dc8b1c0b0cb7c89dc05980566ffe_3422	dcf007684d8598380507220e605e8e2c_1451	7ef7127a3f11d26e5ed74c78ba404004_6716	Pseudomonase_1_02195 Pseudomonase_1_06879
rplN		50S ribosomal protein L14	4	4	1	1	2062				371	371	371	1c58dc8b1c0b0cb7c89dc05980566ffe_7516	dcf007684d8598380507220e605e8e2c_6814	7ef7127a3f11d26e5ed74c78ba404004_834	Pseudomonase_1_09669
rpsN		30S ribosomal protein S14	4	5	1.25	1	2059				305	305	305	1c58dc8b1c0b0cb7c89dc05980566ffe_7522	dcf007684d8598380507220e605e8e2c_6808	7ef7127a3f11d26e5ed74c78ba404004_840	Pseudomonase_1_09672 Pseudomonase_1_09822
rplF		50S ribosomal protein L6	4	5	1.25	1	2057				533	533	533	1c58dc8b1c0b0cb7c89dc05980566ffe_7526	dcf007684d8598380507220e605e8e2c_6804	7ef7127a3f11d26e5ed74c78ba404004_844	Pseudomonase_1_09674 Pseudomonase_1_09824
rpoB		DNA-directed RNA polymerase subunit beta	4	5	1.25	1	2263				4028	4028	4028	1c58dc8b1c0b0cb7c89dc05980566ffe_6162	dcf007684d8598380507220e605e8e2c_8285	7ef7127a3f11d26e5ed74c78ba404004_9479	Pseudomonase_1_05849 Pseudomonase_1_06146
ppsA		phosphoenolpyruvate synthase	4	5	1.25	1	8426				2378	2378	2378	1c58dc8b1c0b0cb7c89dc05980566ffe_300	dcf007684d8598380507220e605e8e2c_3292	7ef7127a3f11d26e5ed74c78ba404004_4545	Pseudomonase_1_01430 Pseudomonase_1_01175
sufB		Fe-S cluster assembly protein SufB	4	5	1.25	1	8398				1487	1487	1487	1c58dc8b1c0b0cb7c89dc05980566ffe_349	dcf007684d8598380507220e605e8e2c_3251	7ef7127a3f11d26e5ed74c78ba404004_4586	Pseudomonase_1_01451 Pseudomonase_1_01195
gloA		lactoylglutathione lyase	4	5	1.25	1	7747				407	407	407	1c58dc8b1c0b0cb7c89dc05980566ffe_662	dcf007684d8598380507220e605e8e2c_3181	7ef7127a3f11d26e5ed74c78ba404004_4656	Pseudomonase_1_01607 Pseudomonase_1_01227
nth		endonuclease III	4	5	1.25	1	7705				635	635	635	1c58dc8b1c0b0cb7c89dc05980566ffe_700	dcf007684d8598380507220e605e8e2c_3145	7ef7127a3f11d26e5ed74c78ba404004_4692	Pseudomonase_1_01627 Pseudomonase_1_01244
rsxA		electron transport complex subunit RsxA	4	5	1.25	1	7699				581	581	581	1c58dc8b1c0b0cb7c89dc05980566ffe_712	dcf007684d8598380507220e605e8e2c_3133	7ef7127a3f11d26e5ed74c78ba404004_4704	Pseudomonase_1_01633 Pseudomonase_1_01250
phoH		phosphate starvation-inducible protein PhoH	4	5	1.25	1	5783				788	1064	897	1c58dc8b1c0b0cb7c89dc05980566ffe_2691	dcf007684d8598380507220e605e8e2c_2084	7ef7127a3f11d26e5ed74c78ba404004_5899	Pseudomonase_1_06408 Pseudomonase_1_01905
trxB		thioredoxin-disulfide reductase	4	5	1.25	1	5970				965	1070	992	1c58dc8b1c0b0cb7c89dc05980566ffe_2932	dcf007684d8598380507220e605e8e2c_1801	7ef7127a3f11d26e5ed74c78ba404004_6134	Pseudomonase_1_07703 Pseudomonase_1_02018
tuf		elongation factor Tu	4	8	2	1	2254				126	1184	920	1c58dc8b1c0b0cb7c89dc05980566ffe_6176 1c58dc8b1c0b0cb7c89dc05980566ffe_7486	dcf007684d8598380507220e605e8e2c_8269	7ef7127a3f11d26e5ed74c78ba404004_776 7ef7127a3f11d26e5ed74c78ba404004_9493	Pseudomonase_1_06154 Pseudomonase_1_05842 Pseudomonase_1_10064
rnpA		ribonuclease P protein component	4	5	1.25	1	7076				326	359	345	1c58dc8b1c0b0cb7c89dc05980566ffe_6691	dcf007684d8598380507220e605e8e2c_7689	7ef7127a3f11d26e5ed74c78ba404004_10115	Pseudomonase_1_04950 Pseudomonase_1_05442
fnr		fumarate/nitrate reduction transcriptional regulator Fnr	4	5	1.25	1	9978				752	752	752	1c58dc8b1c0b0cb7c89dc05980566ffe_1681	dcf007684d8598380507220e605e8e2c_2707	7ef7127a3f11d26e5ed74c78ba404004_5136	Pseudomonase_1_03073 Pseudomonase_1_04834
yedF		sulfurtransferase-like selenium metabolism protein YedF	4	5	1.25	1	10074				233	233	233	1c58dc8b1c0b0cb7c89dc05980566ffe_1733	dcf007684d8598380507220e605e8e2c_3754	7ef7127a3f11d26e5ed74c78ba404004_4085	Pseudomonase_1_03048 Pseudomonase_1_00933
prfB		peptide chain release factor 2	4	5	1.25	1	3736				881	1022	981	1c58dc8b1c0b0cb7c89dc05980566ffe_8481	dcf007684d8598380507220e605e8e2c_5865	7ef7127a3f11d26e5ed74c78ba404004_1932	Pseudomonase_1_02357 Pseudomonase_1_07184
WP_224223510.1		IS1 family transposase	4	10	2.5	1	6195				185	275	251	1c58dc8b1c0b0cb7c89dc05980566ffe_10706 1c58dc8b1c0b0cb7c89dc05980566ffe_10885	dcf007684d8598380507220e605e8e2c_9205	7ef7127a3f11d26e5ed74c78ba404004_6293	Pseudomonase_1_05624 Pseudomonase_1_08409 Pseudomonase_1_09640 Pseudomonase_1_07123 Pseudomonase_1_09653 Pseudomonase_1_10086
chbB		PTS N,N'-diacetylchitobiose transporter subunit IIB	4	5	1.25	1	8268				320	320	320	1c58dc8b1c0b0cb7c89dc05980566ffe_2302	dcf007684d8598380507220e605e8e2c_3363	7ef7127a3f11d26e5ed74c78ba404004_4474	Pseudomonase_1_02838 Pseudomonase_1_01141
gapA		glyceraldehyde-3-phosphate dehydrogenase	4	5	1.25	1	10917				995	995	995	1c58dc8b1c0b0cb7c89dc05980566ffe_2387	dcf007684d8598380507220e605e8e2c_3449	7ef7127a3f11d26e5ed74c78ba404004_4388	Pseudomonase_1_08768 Pseudomonase_1_01098
potC		spermidine/putrescine ABC transporter permease PotC	4	5	1.25	1	598				785	794	790	1c58dc8b1c0b0cb7c89dc05980566ffe_2531	dcf007684d8598380507220e605e8e2c_2277	7ef7127a3f11d26e5ed74c78ba404004_5706	Pseudomonase_1_08840 Pseudomonase_1_09309
ptsG		PTS glucose transporter subunit IIBC	4	5	1.25	1	572				1433	1433	1433	1c58dc8b1c0b0cb7c89dc05980566ffe_2583	dcf007684d8598380507220e605e8e2c_2231	7ef7127a3f11d26e5ed74c78ba404004_5752	Pseudomonase_1_06359 Pseudomonase_1_09333
fabF		beta-ketoacyl-ACP synthase II	4	5	1.25	1	564				1241	1241	1241	1c58dc8b1c0b0cb7c89dc05980566ffe_2595	dcf007684d8598380507220e605e8e2c_2219	7ef7127a3f11d26e5ed74c78ba404004_5764	Pseudomonase_1_06365 Pseudomonase_1_09339
putP		sodium/proline symporter PutP	4	5	1.25	1	5789				1508	1508	1508	1c58dc8b1c0b0cb7c89dc05980566ffe_2703	dcf007684d8598380507220e605e8e2c_2076	7ef7127a3f11d26e5ed74c78ba404004_5907	Pseudomonase_1_06414 Pseudomonase_1_01909
ymdF		general stress protein	4	5	1.25	1	5801				173	173	173	1c58dc8b1c0b0cb7c89dc05980566ffe_2727	dcf007684d8598380507220e605e8e2c_2054	7ef7127a3f11d26e5ed74c78ba404004_5929	Pseudomonase_1_06427 Pseudomonase_1_01920
yccU		CoA-binding protein	4	5	1.25	1	5843				413	413	413	1c58dc8b1c0b0cb7c89dc05980566ffe_2794	dcf007684d8598380507220e605e8e2c_1935	7ef7127a3f11d26e5ed74c78ba404004_6000	Pseudomonase_1_06517 Pseudomonase_1_01951
asnS		asparagine--tRNA ligase	4	5	1.25	1	5890				1400	1400	1400	1c58dc8b1c0b0cb7c89dc05980566ffe_2858	dcf007684d8598380507220e605e8e2c_1879	7ef7127a3f11d26e5ed74c78ba404004_6056	Pseudomonase_1_06549 Pseudomonase_1_01979
ihfB		integration host factor subunit beta	4	5	1.25	1	5908				284	287	285	1c58dc8b1c0b0cb7c89dc05980566ffe_2894	dcf007684d8598380507220e605e8e2c_1843	7ef7127a3f11d26e5ed74c78ba404004_6092	Pseudomonase_1_06568 Pseudomonase_1_01997
pflA		pyruvate formate lyase 1-activating protein	4	5	1.25	1	5920				740	740	740	1c58dc8b1c0b0cb7c89dc05980566ffe_2912	dcf007684d8598380507220e605e8e2c_1823	7ef7127a3f11d26e5ed74c78ba404004_6112	Pseudomonase_1_07693 Pseudomonase_1_02007
rarA		replication-associated recombination protein RarA	4	5	1.25	1	5963				1343	1343	1343	1c58dc8b1c0b0cb7c89dc05980566ffe_2924	dcf007684d8598380507220e605e8e2c_1809	7ef7127a3f11d26e5ed74c78ba404004_6126	Pseudomonase_1_07699 Pseudomonase_1_02014
clpA		ATP-dependent Clp protease ATP-binding subunit ClpA	4	5	1.25	1	7450				2276	2279	2277	1c58dc8b1c0b0cb7c89dc05980566ffe_2942	dcf007684d8598380507220e605e8e2c_1788	7ef7127a3f11d26e5ed74c78ba404004_6358	Pseudomonase_1_07708 Pseudomonase_1_02024
artP		arginine ABC transporter ATP-binding protein ArtP	4	5	1.25	1	7469				728	728	728	1c58dc8b1c0b0cb7c89dc05980566ffe_2978	dcf007684d8598380507220e605e8e2c_1720	7ef7127a3f11d26e5ed74c78ba404004_6426	Pseudomonase_1_07727 Pseudomonase_1_02056
prs		ribose-phosphate diphosphokinase	4	5	1.25	1	8545				947	1013	960	1c58dc8b1c0b0cb7c89dc05980566ffe_117	dcf007684d8598380507220e605e8e2c_2429	7ef7127a3f11d26e5ed74c78ba404004_5412	Pseudomonase_1_01352 Pseudomonase_1_04700
ybiT		ABC-F family ATPase	4	5	1.25	1	1337				1592	1592	1592	1c58dc8b1c0b0cb7c89dc05980566ffe_3178	dcf007684d8598380507220e605e8e2c_1634	7ef7127a3f11d26e5ed74c78ba404004_6512	Pseudomonase_1_07773 Pseudomonase_1_02099
pal		peptidoglycan-associated lipoprotein Pal	4	5	1.25	1	1137				521	524	522	1c58dc8b1c0b0cb7c89dc05980566ffe_3392	dcf007684d8598380507220e605e8e2c_1483	7ef7127a3f11d26e5ed74c78ba404004_6684	Pseudomonase_1_06894 Pseudomonase_1_02178
tolQ		Tol-Pal system protein TolQ	4	5	1.25	1	1115				692	692	692	1c58dc8b1c0b0cb7c89dc05980566ffe_3400	dcf007684d8598380507220e605e8e2c_1475	7ef7127a3f11d26e5ed74c78ba404004_6692	Pseudomonase_1_06890 Pseudomonase_1_02182
sucD		succinate--CoA ligase subunit alpha	4	5	1.25	1	1106				869	869	869	1c58dc8b1c0b0cb7c89dc05980566ffe_3412	dcf007684d8598380507220e605e8e2c_1461	7ef7127a3f11d26e5ed74c78ba404004_6706	Pseudomonase_1_06884 Pseudomonase_1_02190
sucC		ADP-forming succinate--CoA ligase subunit beta	4	5	1.25	1	1105				1166	1166	1166	1c58dc8b1c0b0cb7c89dc05980566ffe_3414	dcf007684d8598380507220e605e8e2c_1459	7ef7127a3f11d26e5ed74c78ba404004_6708	Pseudomonase_1_06883 Pseudomonase_1_02191
infC		translation initiation factor IF-3	4	5	1.25	1	8451				434	542	498	1c58dc8b1c0b0cb7c89dc05980566ffe_257	dcf007684d8598380507220e605e8e2c_3325	7ef7127a3f11d26e5ed74c78ba404004_4512	Pseudomonase_1_01411 Pseudomonase_1_01160
sdhB		succinate dehydrogenase iron-sulfur subunit SdhB	4	5	1.25	1	1102				716	716	716	1c58dc8b1c0b0cb7c89dc05980566ffe_3420	dcf007684d8598380507220e605e8e2c_1453	7ef7127a3f11d26e5ed74c78ba404004_6714	Pseudomonase_1_06880 Pseudomonase_1_02194
gltA		citrate synthase	4	5	1.25	1	1097				1283	1283	1283	1c58dc8b1c0b0cb7c89dc05980566ffe_3428	dcf007684d8598380507220e605e8e2c_1443	7ef7127a3f11d26e5ed74c78ba404004_6724	Pseudomonase_1_06876 Pseudomonase_1_02199
pgm		phosphoglucomutase (alpha-D-glucose-1,6-bisphosphate-dependent)	4	5	1.25	1	1074				1640	1640	1640	1c58dc8b1c0b0cb7c89dc05980566ffe_3466	dcf007684d8598380507220e605e8e2c_1401	7ef7127a3f11d26e5ed74c78ba404004_6766	Pseudomonase_1_06858 Pseudomonase_1_02218
fldA		flavodoxin FldA	4	5	1.25	1	1070				530	530	530	1c58dc8b1c0b0cb7c89dc05980566ffe_3474	dcf007684d8598380507220e605e8e2c_1393	7ef7127a3f11d26e5ed74c78ba404004_6774	Pseudomonase_1_06854 Pseudomonase_1_02222
fur		ferric iron uptake transcriptional regulator	4	5	1.25	1	1066				446	452	448	1c58dc8b1c0b0cb7c89dc05980566ffe_3476	dcf007684d8598380507220e605e8e2c_1389	7ef7127a3f11d26e5ed74c78ba404004_6778	Pseudomonase_1_06853 Pseudomonase_1_02223
miaB		tRNA (N6-isopentenyl adenosine(37)-C2)-methylthiotransferase MiaB	4	5	1.25	1	1046				1424	1424	1424	1c58dc8b1c0b0cb7c89dc05980566ffe_3523	dcf007684d8598380507220e605e8e2c_1349	7ef7127a3f11d26e5ed74c78ba404004_6839	Pseudomonase_1_06833 Pseudomonase_1_02250
leuS		leucine--tRNA ligase	4	5	1.25	1	1031				2582	2582	2582	1c58dc8b1c0b0cb7c89dc05980566ffe_3547	dcf007684d8598380507220e605e8e2c_1325	7ef7127a3f11d26e5ed74c78ba404004_6863	Pseudomonase_1_06821 Pseudomonase_1_02262
mrdB		peptidoglycan glycosyltransferase MrdB	4	5	1.25	1	1019				1112	1112	1112	1c58dc8b1c0b0cb7c89dc05980566ffe_3563	dcf007684d8598380507220e605e8e2c_1309	7ef7127a3f11d26e5ed74c78ba404004_6879	Pseudomonase_1_06813 Pseudomonase_1_02270
ybeD		DUF493 family protein YbeD	4	5	1.25	1	1012				263	263	263	1c58dc8b1c0b0cb7c89dc05980566ffe_3569	dcf007684d8598380507220e605e8e2c_1303	7ef7127a3f11d26e5ed74c78ba404004_6885	Pseudomonase_1_06810 Pseudomonase_1_02273
lipA		lipoyl synthase	4	5	1.25	1	1009				965	965	965	1c58dc8b1c0b0cb7c89dc05980566ffe_3575	dcf007684d8598380507220e605e8e2c_1297	7ef7127a3f11d26e5ed74c78ba404004_6891	Pseudomonase_1_06807 Pseudomonase_1_02276
betT		choline BCCT transporter BetT	4	4	1	1	2471				2033	2033	2033	1c58dc8b1c0b0cb7c89dc05980566ffe_3729	dcf007684d8598380507220e605e8e2c_656	7ef7127a3f11d26e5ed74c78ba404004_7424	Pseudomonase_1_07373
cysS		cysteine--tRNA ligase	4	5	1.25	1	10998				1385	1385	1385	1c58dc8b1c0b0cb7c89dc05980566ffe_4115	dcf007684d8598380507220e605e8e2c_1042	7ef7127a3f11d26e5ed74c78ba404004_7032	Pseudomonase_1_03996 Pseudomonase_1_07117
ppiB		peptidylprolyl isomerase B	4	5	1.25	1	10999				494	494	494	1c58dc8b1c0b0cb7c89dc05980566ffe_4117	dcf007684d8598380507220e605e8e2c_1040	7ef7127a3f11d26e5ed74c78ba404004_7034	Pseudomonase_1_03997 Pseudomonase_1_07116
adk		adenylate kinase	4	5	1.25	1	184				644	644	644	1c58dc8b1c0b0cb7c89dc05980566ffe_4169	dcf007684d8598380507220e605e8e2c_940	7ef7127a3f11d26e5ed74c78ba404004_7134	Pseudomonase_1_04021 Pseudomonase_1_07067
recR		recombination mediator RecR	4	5	1.25	1	181				605	605	605	1c58dc8b1c0b0cb7c89dc05980566ffe_4173	dcf007684d8598380507220e605e8e2c_936	7ef7127a3f11d26e5ed74c78ba404004_7138	Pseudomonase_1_04023 Pseudomonase_1_07065
hha		hemolysin expression modulator Hha	4	5	1.25	1	168				218	218	218	1c58dc8b1c0b0cb7c89dc05980566ffe_4200	dcf007684d8598380507220e605e8e2c_911	7ef7127a3f11d26e5ed74c78ba404004_7163	Pseudomonase_1_04036 Pseudomonase_1_07053
glnK		P-II family nitrogen regulator	4	5	1.25	1	140				338	338	338	1c58dc8b1c0b0cb7c89dc05980566ffe_4261	dcf007684d8598380507220e605e8e2c_890	7ef7127a3f11d26e5ed74c78ba404004_7184	Pseudomonase_1_04064 Pseudomonase_1_07044
hupB		DNA-binding protein HU-beta	4	5	1.25	1	120				272	272	272	1c58dc8b1c0b0cb7c89dc05980566ffe_4283	dcf007684d8598380507220e605e8e2c_870	7ef7127a3f11d26e5ed74c78ba404004_7204	Pseudomonase_1_04075 Pseudomonase_1_07034
yajC		preprotein translocase subunit YajC	4	5	1.25	1	73				332	332	332	1c58dc8b1c0b0cb7c89dc05980566ffe_4371	dcf007684d8598380507220e605e8e2c_804	7ef7127a3f11d26e5ed74c78ba404004_7270	Pseudomonase_1_04120 Pseudomonase_1_07001
tgt		tRNA guanosine(34) transglycosylase Tgt	4	5	1.25	1	72				1127	1127	1127	1c58dc8b1c0b0cb7c89dc05980566ffe_4373	dcf007684d8598380507220e605e8e2c_802	7ef7127a3f11d26e5ed74c78ba404004_7272	Pseudomonase_1_04121 Pseudomonase_1_07000
phoB		phosphate response regulator transcription factor PhoB	4	5	1.25	1	4560				689	689	689	1c58dc8b1c0b0cb7c89dc05980566ffe_4411	dcf007684d8598380507220e605e8e2c_788	7ef7127a3f11d26e5ed74c78ba404004_7286	Pseudomonase_1_04139 Pseudomonase_1_06993
ecpD		fimbrial adhesin EcpD	4	5	1.25	1	4835				1643	1643	1643	1c58dc8b1c0b0cb7c89dc05980566ffe_4507	dcf007684d8598380507220e605e8e2c_588	7ef7127a3f11d26e5ed74c78ba404004_7495	Pseudomonase_1_04185 Pseudomonase_1_09136
gpt		xanthine phosphoribosyltransferase	4	5	1.25	1	5492				458	458	458	1c58dc8b1c0b0cb7c89dc05980566ffe_4612	dcf007684d8598380507220e605e8e2c_528	7ef7127a3f11d26e5ed74c78ba404004_7677	Pseudomonase_1_04249 Pseudomonase_1_08901
metI		methionine ABC transporter permease MetI	4	5	1.25	1	5461				653	653	653	1c58dc8b1c0b0cb7c89dc05980566ffe_4695	dcf007684d8598380507220e605e8e2c_417	7ef7127a3f11d26e5ed74c78ba404004_7880	Pseudomonase_1_07544 Pseudomonase_1_05161
metQ		methionine ABC transporter substrate-binding lipoprotein MetQ	4	5	1.25	1	5460				815	815	815	1c58dc8b1c0b0cb7c89dc05980566ffe_4697	dcf007684d8598380507220e605e8e2c_415	7ef7127a3f11d26e5ed74c78ba404004_7882	Pseudomonase_1_07543 Pseudomonase_1_05162
proS		proline--tRNA ligase	4	5	1.25	1	5457				1718	1718	1718	1c58dc8b1c0b0cb7c89dc05980566ffe_4703	dcf007684d8598380507220e605e8e2c_409	7ef7127a3f11d26e5ed74c78ba404004_7888	Pseudomonase_1_07540 Pseudomonase_1_05165
accA		acetyl-CoA carboxylase carboxyl transferase subunit alpha	4	5	1.25	1	5438				959	959	959	1c58dc8b1c0b0cb7c89dc05980566ffe_4723	dcf007684d8598380507220e605e8e2c_389	7ef7127a3f11d26e5ed74c78ba404004_7908	Pseudomonase_1_07530 Pseudomonase_1_05175
dnaE		DNA polymerase III subunit alpha	4	5	1.25	1	5437				3482	3482	3482	1c58dc8b1c0b0cb7c89dc05980566ffe_4725	dcf007684d8598380507220e605e8e2c_387	7ef7127a3f11d26e5ed74c78ba404004_7910	Pseudomonase_1_07529 Pseudomonase_1_05176
fabZ		3-hydroxyacyl-ACP dehydratase FabZ	4	5	1.25	1	5433				455	455	455	1c58dc8b1c0b0cb7c89dc05980566ffe_4733	dcf007684d8598380507220e605e8e2c_379	7ef7127a3f11d26e5ed74c78ba404004_7918	Pseudomonase_1_07525 Pseudomonase_1_05180
frr		ribosome recycling factor	4	5	1.25	1	5422				557	557	557	1c58dc8b1c0b0cb7c89dc05980566ffe_4749	dcf007684d8598380507220e605e8e2c_363	7ef7127a3f11d26e5ed74c78ba404004_7934	Pseudomonase_1_07517 Pseudomonase_1_05188
tsf		translation elongation factor Ts	4	5	1.25	1	5420				851	851	851	1c58dc8b1c0b0cb7c89dc05980566ffe_4753	dcf007684d8598380507220e605e8e2c_359	7ef7127a3f11d26e5ed74c78ba404004_7938	Pseudomonase_1_07515 Pseudomonase_1_05190
map		type I methionyl aminopeptidase	4	5	1.25	1	5418				794	794	794	1c58dc8b1c0b0cb7c89dc05980566ffe_4757	dcf007684d8598380507220e605e8e2c_355	7ef7127a3f11d26e5ed74c78ba404004_7942	Pseudomonase_1_07513 Pseudomonase_1_05192
dapD		2,3,4,5-tetrahydropyridine-2,6-dicarboxylate N-succinyltransferase	4	5	1.25	1	5416				824	824	824	1c58dc8b1c0b0cb7c89dc05980566ffe_4761	dcf007684d8598380507220e605e8e2c_351	7ef7127a3f11d26e5ed74c78ba404004_7946	Pseudomonase_1_07511 Pseudomonase_1_05194
yaeH		DUF3461 family protein	4	5	1.25	1	5414				386	386	386	1c58dc8b1c0b0cb7c89dc05980566ffe_4763	dcf007684d8598380507220e605e8e2c_349	7ef7127a3f11d26e5ed74c78ba404004_7948	Pseudomonase_1_07510 Pseudomonase_1_05195
erpA		iron-sulfur cluster insertion protein ErpA	4	5	1.25	1	5407				344	344	344	1c58dc8b1c0b0cb7c89dc05980566ffe_4777	dcf007684d8598380507220e605e8e2c_335	7ef7127a3f11d26e5ed74c78ba404004_7962	Pseudomonase_1_07503 Pseudomonase_1_05202
can		carbonate dehydratase	4	5	1.25	1	10609				662	662	662	1c58dc8b1c0b0cb7c89dc05980566ffe_4857	dcf007684d8598380507220e605e8e2c_269	7ef7127a3f11d26e5ed74c78ba404004_8028	Pseudomonase_1_07465 Pseudomonase_1_05233
acnB		bifunctional aconitate hydratase 2/2-methylisocitrate dehydratase	4	5	1.25	1	10628				2597	2597	2597	1c58dc8b1c0b0cb7c89dc05980566ffe_4884	dcf007684d8598380507220e605e8e2c_253	7ef7127a3f11d26e5ed74c78ba404004_8044	Pseudomonase_1_07455 Pseudomonase_1_05241
lpdA		dihydrolipoyl dehydrogenase	4	5	1.25	1	10643				1424	1424	1424	1c58dc8b1c0b0cb7c89dc05980566ffe_4892	dcf007684d8598380507220e605e8e2c_249	7ef7127a3f11d26e5ed74c78ba404004_8048	Pseudomonase_1_07451 Pseudomonase_1_05243
fabA		bifunctional 3-hydroxydecanoyl-ACP dehydratase/trans-2-decenoyl-ACP isomerase	4	5	1.25	1	5854				518	626	539	1c58dc8b1c0b0cb7c89dc05980566ffe_2814	dcf007684d8598380507220e605e8e2c_1913	7ef7127a3f11d26e5ed74c78ba404004_6022	Pseudomonase_1_06527 Pseudomonase_1_01962
lpxC		UDP-3-O-acyl-N-acetylglucosamine deacetylase	4	5	1.25	1	10567				917	917	917	1c58dc8b1c0b0cb7c89dc05980566ffe_4932	dcf007684d8598380507220e605e8e2c_199	7ef7127a3f11d26e5ed74c78ba404004_8098	Pseudomonase_1_07431 Pseudomonase_1_05265
mraY		phospho-N-acetylmuramoyl-pentapeptide-transferase	4	5	1.25	1	10553				1082	1082	1082	1c58dc8b1c0b0cb7c89dc05980566ffe_4950	dcf007684d8598380507220e605e8e2c_181	7ef7127a3f11d26e5ed74c78ba404004_8116	Pseudomonase_1_07422 Pseudomonase_1_05274
ftsL		cell division protein FtsL	4	5	1.25	1	10549				365	365	365	1c58dc8b1c0b0cb7c89dc05980566ffe_4958	dcf007684d8598380507220e605e8e2c_173	7ef7127a3f11d26e5ed74c78ba404004_8124	Pseudomonase_1_07418 Pseudomonase_1_05278
cra		catabolite repressor/activator	4	5	1.25	1	10545				1004	1004	1004	1c58dc8b1c0b0cb7c89dc05980566ffe_4964	dcf007684d8598380507220e605e8e2c_167	7ef7127a3f11d26e5ed74c78ba404004_8130	Pseudomonase_1_07415 Pseudomonase_1_05281
ilvN		acetolactate synthase small subunit	4	5	1.25	1	10544				491	491	491	1c58dc8b1c0b0cb7c89dc05980566ffe_4966	dcf007684d8598380507220e605e8e2c_163	7ef7127a3f11d26e5ed74c78ba404004_8134	Pseudomonase_1_07414 Pseudomonase_1_05282
leuC		3-isopropylmalate dehydratase large subunit	4	5	1.25	1	10538				1400	1400	1400	1c58dc8b1c0b0cb7c89dc05980566ffe_4978	dcf007684d8598380507220e605e8e2c_149	7ef7127a3f11d26e5ed74c78ba404004_8148	Pseudomonase_1_06767 Pseudomonase_1_05287
carB		carbamoyl-phosphate synthase large subunit	4	5	1.25	1	4100				3218	3224	3220	1c58dc8b1c0b0cb7c89dc05980566ffe_5053	dcf007684d8598380507220e605e8e2c_64	7ef7127a3f11d26e5ed74c78ba404004_8233	Pseudomonase_1_06730 Pseudomonase_1_05328
dnaJ		molecular chaperone DnaJ	4	5	1.25	1	4124				1130	1133	1131	1c58dc8b1c0b0cb7c89dc05980566ffe_5105	dcf007684d8598380507220e605e8e2c_30	7ef7127a3f11d26e5ed74c78ba404004_8267	Pseudomonase_1_06704 Pseudomonase_1_05345
dnaK		molecular chaperone DnaK	4	5	1.25	1	4027				1916	1916	1916	1c58dc8b1c0b0cb7c89dc05980566ffe_5107	dcf007684d8598380507220e605e8e2c_28	7ef7127a3f11d26e5ed74c78ba404004_8269	Pseudomonase_1_06703 Pseudomonase_1_05346
arcA		two-component system response regulator ArcA	4	5	1.25	1	4001				716	716	716	1c58dc8b1c0b0cb7c89dc05980566ffe_5140	dcf007684d8598380507220e605e8e2c_9434	7ef7127a3f11d26e5ed74c78ba404004_8300	Pseudomonase_1_06689 Pseudomonase_1_05359
ettA		energy-dependent translational throttle protein EttA	4	5	1.25	1	747				1667	1667	1667	1c58dc8b1c0b0cb7c89dc05980566ffe_5160	dcf007684d8598380507220e605e8e2c_9414	7ef7127a3f11d26e5ed74c78ba404004_8320	Pseudomonase_1_06678 Pseudomonase_1_05369
radA		DNA repair protein RadA	4	5	1.25	1	749				1382	1382	1382	1c58dc8b1c0b0cb7c89dc05980566ffe_5164	dcf007684d8598380507220e605e8e2c_9406	7ef7127a3f11d26e5ed74c78ba404004_8328	Pseudomonase_1_06676 Pseudomonase_1_05373
deoD		purine-nucleoside phosphorylase	4	5	1.25	1	754				719	719	719	1c58dc8b1c0b0cb7c89dc05980566ffe_5172	dcf007684d8598380507220e605e8e2c_9396	7ef7127a3f11d26e5ed74c78ba404004_8338	Pseudomonase_1_06672 Pseudomonase_1_05378
pflB		formate C-acetyltransferase	4	5	1.25	1	5919				782	2282	1982	1c58dc8b1c0b0cb7c89dc05980566ffe_2910	dcf007684d8598380507220e605e8e2c_1825	7ef7127a3f11d26e5ed74c78ba404004_6110	Pseudomonase_1_02006 Pseudomonase_1_07692
deoB		phosphopentomutase	4	5	1.25	1	755				1223	1223	1223	1c58dc8b1c0b0cb7c89dc05980566ffe_5174	dcf007684d8598380507220e605e8e2c_9394	7ef7127a3f11d26e5ed74c78ba404004_8340	Pseudomonase_1_06671 Pseudomonase_1_05379
deoC		deoxyribose-phosphate aldolase	4	5	1.25	1	757				779	779	779	1c58dc8b1c0b0cb7c89dc05980566ffe_5178	dcf007684d8598380507220e605e8e2c_9390	7ef7127a3f11d26e5ed74c78ba404004_8344	Pseudomonase_1_06669 Pseudomonase_1_05381
ytjA		DUF1328 domain-containing protein	4	5	1.25	1	763				161	161	161	1c58dc8b1c0b0cb7c89dc05980566ffe_5186	dcf007684d8598380507220e605e8e2c_9380	7ef7127a3f11d26e5ed74c78ba404004_8354	Pseudomonase_1_06665 Pseudomonase_1_05386
prfC		peptide chain release factor 3	4	5	1.25	1	765				1586	1589	1587	1c58dc8b1c0b0cb7c89dc05980566ffe_5190	dcf007684d8598380507220e605e8e2c_9376	7ef7127a3f11d26e5ed74c78ba404004_8358	Pseudomonase_1_06663 Pseudomonase_1_05388
ftsK		DNA translocase FtsK	4	5	1.25	1	5966				4019	4253	4083	1c58dc8b1c0b0cb7c89dc05980566ffe_2928	dcf007684d8598380507220e605e8e2c_1805	7ef7127a3f11d26e5ed74c78ba404004_6130	Pseudomonase_1_02016 Pseudomonase_1_07701
pepA		leucyl aminopeptidase	4	5	1.25	1	4739				1511	1511	1511	1c58dc8b1c0b0cb7c89dc05980566ffe_5532	dcf007684d8598380507220e605e8e2c_8886	7ef7127a3f11d26e5ed74c78ba404004_8862	Pseudomonase_1_08719 Pseudomonase_1_00705
ybeZ		PhoH family protein	4	5	1.25	1	1045				1040	1079	1050	1c58dc8b1c0b0cb7c89dc05980566ffe_3525	dcf007684d8598380507220e605e8e2c_1347	7ef7127a3f11d26e5ed74c78ba404004_6841	Pseudomonase_1_06832 Pseudomonase_1_02251
valS		valine--tRNA ligase	4	5	1.25	1	4675				2855	2855	2855	1c58dc8b1c0b0cb7c89dc05980566ffe_5536	dcf007684d8598380507220e605e8e2c_8882	7ef7127a3f11d26e5ed74c78ba404004_8866	Pseudomonase_1_08721 Pseudomonase_1_00703
fbp		class 1 fructose-bisphosphatase	4	5	1.25	1	6459				998	998	998	1c58dc8b1c0b0cb7c89dc05980566ffe_5630	dcf007684d8598380507220e605e8e2c_8830	7ef7127a3f11d26e5ed74c78ba404004_8918	Pseudomonase_1_07689 Pseudomonase_1_00679
ppa		inorganic diphosphatase	4	5	1.25	1	6464				530	530	530	1c58dc8b1c0b0cb7c89dc05980566ffe_5640	dcf007684d8598380507220e605e8e2c_8820	7ef7127a3f11d26e5ed74c78ba404004_8928	Pseudomonase_1_07684 Pseudomonase_1_00674
ulaB		PTS ascorbate transporter subunit IIB	4	5	1.25	1	6509				305	305	305	1c58dc8b1c0b0cb7c89dc05980566ffe_5702	dcf007684d8598380507220e605e8e2c_8748	7ef7127a3f11d26e5ed74c78ba404004_9000	Pseudomonase_1_07653 Pseudomonase_1_00638
ulaA		PTS ascorbate transporter subunit IIC	4	5	1.25	1	6510				1397	1400	1398	1c58dc8b1c0b0cb7c89dc05980566ffe_5704	dcf007684d8598380507220e605e8e2c_8746	7ef7127a3f11d26e5ed74c78ba404004_9002	Pseudomonase_1_07652 Pseudomonase_1_00637
ulaG		L-ascorbate 6-phosphate lactonase	4	5	1.25	1	6511				1064	1064	1064	1c58dc8b1c0b0cb7c89dc05980566ffe_5706	dcf007684d8598380507220e605e8e2c_8744	7ef7127a3f11d26e5ed74c78ba404004_9004	Pseudomonase_1_07651 Pseudomonase_1_00636
rlmB		23S rRNA (guanosine(2251)-2'-O)-methyltransferase RlmB	4	5	1.25	1	6528				731	731	731	1c58dc8b1c0b0cb7c89dc05980566ffe_5718	dcf007684d8598380507220e605e8e2c_8720	7ef7127a3f11d26e5ed74c78ba404004_9028	Pseudomonase_1_07645 Pseudomonase_1_00624
purA		adenylosuccinate synthase	4	5	1.25	1	6531				1298	1298	1298	1c58dc8b1c0b0cb7c89dc05980566ffe_5724	dcf007684d8598380507220e605e8e2c_8714	7ef7127a3f11d26e5ed74c78ba404004_9034	Pseudomonase_1_07642 Pseudomonase_1_00621
corC		CNNM family magnesium/cobalt transport protein CorC	4	5	1.25	1	1042				878	947	891	1c58dc8b1c0b0cb7c89dc05980566ffe_3529	dcf007684d8598380507220e605e8e2c_1343	7ef7127a3f11d26e5ed74c78ba404004_6845	Pseudomonase_1_06830 Pseudomonase_1_02253
groL		chaperonin GroEL	4	5	1.25	1	6598				1646	1646	1646	1c58dc8b1c0b0cb7c89dc05980566ffe_5815	dcf007684d8598380507220e605e8e2c_8644	7ef7127a3f11d26e5ed74c78ba404004_9107	Pseudomonase_1_07598 Pseudomonase_1_00587
uvrA		excinuclease ABC subunit UvrA	4	5	1.25	1	2571				2822	2825	2823	1c58dc8b1c0b0cb7c89dc05980566ffe_5995	dcf007684d8598380507220e605e8e2c_8457	7ef7127a3f11d26e5ed74c78ba404004_9297	Pseudomonase_1_08551 Pseudomonase_1_08371
malE		maltose/maltodextrin ABC transporter substrate-binding protein MalE	4	5	1.25	1	2609				1190	1190	1190	1c58dc8b1c0b0cb7c89dc05980566ffe_6041	dcf007684d8598380507220e605e8e2c_8391	7ef7127a3f11d26e5ed74c78ba404004_9363	Pseudomonase_1_08573 Pseudomonase_1_08405
pgi		glucose-6-phosphate isomerase	4	5	1.25	1	2328				1649	1649	1649	1c58dc8b1c0b0cb7c89dc05980566ffe_6061	dcf007684d8598380507220e605e8e2c_8373	7ef7127a3f11d26e5ed74c78ba404004_9381	Pseudomonase_1_08583 Pseudomonase_1_08417
WP_000437896.1		PTS system mannose/fructose/sorbose family transporter subunit IID	4	4	1	1	2313				824	824	824	1c58dc8b1c0b0cb7c89dc05980566ffe_6081	dcf007684d8598380507220e605e8e2c_8354	7ef7127a3f11d26e5ed74c78ba404004_9400	Pseudomonase_1_08426
purH		bifunctional phosphoribosylaminoimidazolecarboxamide formyltransferase/IMP cyclohydrolase	4	5	1.25	1	2290				1589	1589	1589	1c58dc8b1c0b0cb7c89dc05980566ffe_6115	dcf007684d8598380507220e605e8e2c_8324	7ef7127a3f11d26e5ed74c78ba404004_9440	Pseudomonase_1_06122 Pseudomonase_1_05868
hupA		DNA-binding protein HU-alpha	4	5	1.25	1	2284				272	272	272	1c58dc8b1c0b0cb7c89dc05980566ffe_6127	dcf007684d8598380507220e605e8e2c_8312	7ef7127a3f11d26e5ed74c78ba404004_9452	Pseudomonase_1_06128 Pseudomonase_1_05862
hemE		uroporphyrinogen decarboxylase	4	5	1.25	1	2280				1064	1064	1064	1c58dc8b1c0b0cb7c89dc05980566ffe_6133	dcf007684d8598380507220e605e8e2c_8306	7ef7127a3f11d26e5ed74c78ba404004_9458	Pseudomonase_1_06131 Pseudomonase_1_05859
rpoC		DNA-directed RNA polymerase subunit beta'	4	5	1.25	1	2267				4223	4223	4223	1c58dc8b1c0b0cb7c89dc05980566ffe_6160	dcf007684d8598380507220e605e8e2c_8287	7ef7127a3f11d26e5ed74c78ba404004_9477	Pseudomonase_1_06145 Pseudomonase_1_05850
rplL		50S ribosomal protein L7/L12	4	5	1.25	1	2262				365	365	365	1c58dc8b1c0b0cb7c89dc05980566ffe_6164	dcf007684d8598380507220e605e8e2c_8283	7ef7127a3f11d26e5ed74c78ba404004_9481	Pseudomonase_1_06148 Pseudomonase_1_05848
trkH		Trk system potassium transporter TrkH	4	5	1.25	1	2248				1451	1451	1451	1c58dc8b1c0b0cb7c89dc05980566ffe_6213	dcf007684d8598380507220e605e8e2c_8012	7ef7127a3f11d26e5ed74c78ba404004_9774	Pseudomonase_1_08992 Pseudomonase_1_08033
ubiD		4-hydroxy-3-polyprenylbenzoate decarboxylase	4	5	1.25	1	2224				1475	1493	1485	1c58dc8b1c0b0cb7c89dc05980566ffe_6225	dcf007684d8598380507220e605e8e2c_8000	7ef7127a3f11d26e5ed74c78ba404004_9786	Pseudomonase_1_08998 Pseudomonase_1_08027
udp		uridine phosphorylase	4	5	1.25	1	2204				761	764	762	1c58dc8b1c0b0cb7c89dc05980566ffe_6245	dcf007684d8598380507220e605e8e2c_7968	7ef7127a3f11d26e5ed74c78ba404004_9818	Pseudomonase_1_09008 Pseudomonase_1_08011
uvrD		DNA helicase II	4	5	1.25	1	2189				2162	2162	2162	1c58dc8b1c0b0cb7c89dc05980566ffe_6275	dcf007684d8598380507220e605e8e2c_7900	7ef7127a3f11d26e5ed74c78ba404004_9886	Pseudomonase_1_09023 Pseudomonase_1_07977
dapF		diaminopimelate epimerase	4	5	1.25	1	2157				824	824	824	1c58dc8b1c0b0cb7c89dc05980566ffe_6283	dcf007684d8598380507220e605e8e2c_7892	7ef7127a3f11d26e5ed74c78ba404004_9894	Pseudomonase_1_09027 Pseudomonase_1_07973
trxA		thioredoxin TrxA	4	5	1.25	1	2121				329	329	329	1c58dc8b1c0b0cb7c89dc05980566ffe_6339	dcf007684d8598380507220e605e8e2c_7828	7ef7127a3f11d26e5ed74c78ba404004_9958	Pseudomonase_1_09053 Pseudomonase_1_07945
rhlB		ATP-dependent RNA helicase RhlB	4	5	1.25	1	2120				1265	1265	1265	1c58dc8b1c0b0cb7c89dc05980566ffe_6341	dcf007684d8598380507220e605e8e2c_7826	7ef7127a3f11d26e5ed74c78ba404004_9960	Pseudomonase_1_09054 Pseudomonase_1_07944
ppiC		peptidylprolyl isomerase PpiC	4	5	1.25	1	2113				281	281	281	1c58dc8b1c0b0cb7c89dc05980566ffe_6355	dcf007684d8598380507220e605e8e2c_7820	7ef7127a3f11d26e5ed74c78ba404004_9966	Pseudomonase_1_09912 Pseudomonase_1_07941
ilvC		ketol-acid reductoisomerase	4	5	1.25	1	2111				1475	1475	1475	1c58dc8b1c0b0cb7c89dc05980566ffe_6357	dcf007684d8598380507220e605e8e2c_7818	7ef7127a3f11d26e5ed74c78ba404004_9968	Pseudomonase_1_09913 Pseudomonase_1_07940
ilvA		threonine ammonia-lyase, biosynthetic	4	5	1.25	1	2108				1544	1547	1544	1c58dc8b1c0b0cb7c89dc05980566ffe_6361	dcf007684d8598380507220e605e8e2c_7814	7ef7127a3f11d26e5ed74c78ba404004_9972	Pseudomonase_1_09915 Pseudomonase_1_07938
ilvD		dihydroxy-acid dehydratase	4	5	1.25	1	2107				1850	1850	1850	1c58dc8b1c0b0cb7c89dc05980566ffe_6363	dcf007684d8598380507220e605e8e2c_7812	7ef7127a3f11d26e5ed74c78ba404004_9974	Pseudomonase_1_09916 Pseudomonase_1_07937
oxyR		DNA-binding transcriptional regulator OxyR	4	5	1.25	1	1614				917	917	917	1c58dc8b1c0b0cb7c89dc05980566ffe_6415	dcf007684d8598380507220e605e8e2c_8232	7ef7127a3f11d26e5ed74c78ba404004_9542	Pseudomonase_1_08342 Pseudomonase_1_07920
metB		cystathionine gamma-synthase	4	5	1.25	1	1592				1160	1160	1160	1c58dc8b1c0b0cb7c89dc05980566ffe_6449	dcf007684d8598380507220e605e8e2c_8176	7ef7127a3f11d26e5ed74c78ba404004_9598	Pseudomonase_1_08325 Pseudomonase_1_07891
ecpA		common pilus major fimbrillin subunit EcpA	4	5	1.25	1	4832				572	587	584	1c58dc8b1c0b0cb7c89dc05980566ffe_4513	dcf007684d8598380507220e605e8e2c_594	7ef7127a3f11d26e5ed74c78ba404004_7489	Pseudomonase_1_04188 Pseudomonase_1_09133
hslV		ATP-dependent protease subunit HslV	4	5	1.25	1	1580				530	530	530	1c58dc8b1c0b0cb7c89dc05980566ffe_6461	dcf007684d8598380507220e605e8e2c_8162	7ef7127a3f11d26e5ed74c78ba404004_9612	Pseudomonase_1_08319 Pseudomonase_1_07884
cpxR		envelope stress response regulator transcription factor CpxR	4	5	1.25	1	1561				698	698	698	1c58dc8b1c0b0cb7c89dc05980566ffe_6475	dcf007684d8598380507220e605e8e2c_8124	7ef7127a3f11d26e5ed74c78ba404004_9650	Pseudomonase_1_08312 Pseudomonase_1_07865
typA		ribosome-dependent GTPase TypA	4	5	1.25	1	6989				1823	1823	1823	1c58dc8b1c0b0cb7c89dc05980566ffe_6559	dcf007684d8598380507220e605e8e2c_8048	7ef7127a3f11d26e5ed74c78ba404004_9726	Pseudomonase_1_08269 Pseudomonase_1_07827
rbsB		ribose ABC transporter substrate-binding protein RbsB	4	5	1.25	1	7029				890	890	890	1c58dc8b1c0b0cb7c89dc05980566ffe_6609	dcf007684d8598380507220e605e8e2c_7783	7ef7127a3f11d26e5ed74c78ba404004_10021	Pseudomonase_1_04905 Pseudomonase_1_05397
rbsC		ribose ABC transporter permease	4	5	1.25	1	7030				965	965	965	1c58dc8b1c0b0cb7c89dc05980566ffe_6611	dcf007684d8598380507220e605e8e2c_7781	7ef7127a3f11d26e5ed74c78ba404004_10023	Pseudomonase_1_04906 Pseudomonase_1_05398
rbsA		ribose ABC transporter ATP-binding protein RbsA	4	5	1.25	1	7031				1505	1505	1505	1c58dc8b1c0b0cb7c89dc05980566ffe_6613	dcf007684d8598380507220e605e8e2c_7779	7ef7127a3f11d26e5ed74c78ba404004_10025	Pseudomonase_1_04907 Pseudomonase_1_05399
mnmG		tRNA uridine-5-carboxymethylaminomethyl(34) synthesis enzyme MnmG	4	5	1.25	1	7045				1889	1889	1889	1c58dc8b1c0b0cb7c89dc05980566ffe_6629	dcf007684d8598380507220e605e8e2c_7763	7ef7127a3f11d26e5ed74c78ba404004_10041	Pseudomonase_1_04915 Pseudomonase_1_05407
atpG		F0F1 ATP synthase subunit gamma	4	5	1.25	1	7053				863	863	863	1c58dc8b1c0b0cb7c89dc05980566ffe_6645	dcf007684d8598380507220e605e8e2c_7747	7ef7127a3f11d26e5ed74c78ba404004_10057	Pseudomonase_1_04923 Pseudomonase_1_05415
atpC		F0F1 ATP synthase subunit epsilon	4	5	1.25	1	7055				419	419	419	1c58dc8b1c0b0cb7c89dc05980566ffe_6649	dcf007684d8598380507220e605e8e2c_7743	7ef7127a3f11d26e5ed74c78ba404004_10061	Pseudomonase_1_04925 Pseudomonase_1_05417
dnaN		DNA polymerase III subunit beta	4	5	1.25	1	7080				1100	1100	1100	1c58dc8b1c0b0cb7c89dc05980566ffe_6697	dcf007684d8598380507220e605e8e2c_7681	7ef7127a3f11d26e5ed74c78ba404004_5	Pseudomonase_1_04952 Pseudomonase_1_05444
gyrB		DNA topoisomerase (ATP-hydrolyzing) subunit B	4	5	1.25	1	7082				2414	2414	2414	1c58dc8b1c0b0cb7c89dc05980566ffe_6701	dcf007684d8598380507220e605e8e2c_7677	7ef7127a3f11d26e5ed74c78ba404004_9	Pseudomonase_1_04954 Pseudomonase_1_05446
ibpA		heat shock chaperone IbpA	4	5	1.25	1	7093				413	413	413	1c58dc8b1c0b0cb7c89dc05980566ffe_6724	dcf007684d8598380507220e605e8e2c_7652	7ef7127a3f11d26e5ed74c78ba404004_34	Pseudomonase_1_04965 Pseudomonase_1_05458
uhpT		hexose-6-phosphate:phosphate antiporter	4	5	1.25	1	7377				1391	1391	1391	1c58dc8b1c0b0cb7c89dc05980566ffe_6774	dcf007684d8598380507220e605e8e2c_7616	7ef7127a3f11d26e5ed74c78ba404004_70	Pseudomonase_1_04988 Pseudomonase_1_05475
spoT		bifunctional GTP diphosphokinase/guanosine-3',5'-bis pyrophosphate 3'-pyrophosphohydrolase	4	5	1.25	1	7340				2108	2120	2112	1c58dc8b1c0b0cb7c89dc05980566ffe_6923	dcf007684d8598380507220e605e8e2c_7539	7ef7127a3f11d26e5ed74c78ba404004_147	Pseudomonase_1_05061 Pseudomonase_1_05512
secA		preprotein translocase subunit SecA	4	7	1.75	1	10670				668	2705	2123	1c58dc8b1c0b0cb7c89dc05980566ffe_4928 1c58dc8b1c0b0cb7c89dc05980566ffe_10385	dcf007684d8598380507220e605e8e2c_203	7ef7127a3f11d26e5ed74c78ba404004_8094	Pseudomonase_1_07433 Pseudomonase_1_05985 Pseudomonase_1_05263
rph		ribonuclease PH	4	5	1.25	1	7322				716	716	716	1c58dc8b1c0b0cb7c89dc05980566ffe_6951	dcf007684d8598380507220e605e8e2c_7525	7ef7127a3f11d26e5ed74c78ba404004_161	Pseudomonase_1_05075 Pseudomonase_1_05519
slmA		nucleoid occlusion factor SlmA	4	5	1.25	1	7317				596	596	596	1c58dc8b1c0b0cb7c89dc05980566ffe_6955	dcf007684d8598380507220e605e8e2c_7521	7ef7127a3f11d26e5ed74c78ba404004_165	Pseudomonase_1_05077 Pseudomonase_1_05521
rpmG		50S ribosomal protein L33	4	5	1.25	1	7312				167	167	167	1c58dc8b1c0b0cb7c89dc05980566ffe_6965	dcf007684d8598380507220e605e8e2c_7511	7ef7127a3f11d26e5ed74c78ba404004_175	Pseudomonase_1_05082 Pseudomonase_1_05526
rfaD		ADP-glyceromanno-heptose 6-epimerase	4	5	1.25	1	7296				932	932	932	1c58dc8b1c0b0cb7c89dc05980566ffe_6995	dcf007684d8598380507220e605e8e2c_7481	7ef7127a3f11d26e5ed74c78ba404004_205	Pseudomonase_1_05097 Pseudomonase_1_05541
tdh		L-threonine 3-dehydrogenase	4	5	1.25	1	7294				1025	1025	1025	1c58dc8b1c0b0cb7c89dc05980566ffe_6999	dcf007684d8598380507220e605e8e2c_7477	7ef7127a3f11d26e5ed74c78ba404004_209	Pseudomonase_1_05099 Pseudomonase_1_05543
cysE		serine O-acetyltransferase	4	5	1.25	1	7284				821	821	821	1c58dc8b1c0b0cb7c89dc05980566ffe_7017	dcf007684d8598380507220e605e8e2c_7459	7ef7127a3f11d26e5ed74c78ba404004_227	Pseudomonase_1_05108 Pseudomonase_1_05552
dppF		dipeptide ABC transporter ATP-binding subunit DppF	4	5	1.25	1	6401				1004	1013	1007	1c58dc8b1c0b0cb7c89dc05980566ffe_7136	dcf007684d8598380507220e605e8e2c_7328	7ef7127a3f11d26e5ed74c78ba404004_356	Pseudomonase_1_06327 Pseudomonase_1_05617
rsmJ		16S rRNA (guanine(1516)-N(2))-methyltransferase RsmJ	4	5	1.25	1	7849				752	752	752	1c58dc8b1c0b0cb7c89dc05980566ffe_7206	dcf007684d8598380507220e605e8e2c_7182	7ef7127a3f11d26e5ed74c78ba404004_458	Pseudomonase_1_06293 Pseudomonase_1_05685
uspB		universal stress protein UspB	4	5	1.25	1	7845				335	335	335	1c58dc8b1c0b0cb7c89dc05980566ffe_7212	dcf007684d8598380507220e605e8e2c_7174	7ef7127a3f11d26e5ed74c78ba404004_466	Pseudomonase_1_06290 Pseudomonase_1_05688
rpoH		RNA polymerase sigma factor RpoH	4	5	1.25	1	4480				854	854	854	1c58dc8b1c0b0cb7c89dc05980566ffe_7276	dcf007684d8598380507220e605e8e2c_7118	7ef7127a3f11d26e5ed74c78ba404004_522	Pseudomonase_1_06258 Pseudomonase_1_05715
deoA		thymidine phosphorylase	4	5	1.25	1	756				1322	1373	1332	1c58dc8b1c0b0cb7c89dc05980566ffe_5176	dcf007684d8598380507220e605e8e2c_9392	7ef7127a3f11d26e5ed74c78ba404004_8342	Pseudomonase_1_06670 Pseudomonase_1_05380
livJ		branched chain amino acid ABC transporter substrate-binding protein LivJ	4	5	1.25	1	4481				1097	1103	1101	1c58dc8b1c0b0cb7c89dc05980566ffe_7286	dcf007684d8598380507220e605e8e2c_7116	7ef7127a3f11d26e5ed74c78ba404004_524	Pseudomonase_1_06253 Pseudomonase_1_05716
livH		high-affinity branched-chain amino acid ABC transporter permease LivH	4	5	1.25	1	4435				926	926	926	1c58dc8b1c0b0cb7c89dc05980566ffe_7292	dcf007684d8598380507220e605e8e2c_7110	7ef7127a3f11d26e5ed74c78ba404004_530	Pseudomonase_1_06250 Pseudomonase_1_05719
livG		high-affinity branched-chain amino acid ABC transporter ATP-binding protein LivG	4	5	1.25	1	4431				767	767	767	1c58dc8b1c0b0cb7c89dc05980566ffe_7296	dcf007684d8598380507220e605e8e2c_7106	7ef7127a3f11d26e5ed74c78ba404004_534	Pseudomonase_1_06248 Pseudomonase_1_05721
gntU		gluconate transporter	4	5	1.25	1	4413				1340	1340	1340	1c58dc8b1c0b0cb7c89dc05980566ffe_7330	dcf007684d8598380507220e605e8e2c_7070	7ef7127a3f11d26e5ed74c78ba404004_570	Pseudomonase_1_06231 Pseudomonase_1_05738
nfuA		Fe-S biogenesis protein NfuA	4	5	1.25	1	4395				575	575	575	1c58dc8b1c0b0cb7c89dc05980566ffe_7366	dcf007684d8598380507220e605e8e2c_7006	7ef7127a3f11d26e5ed74c78ba404004_634	Pseudomonase_1_06214 Pseudomonase_1_05770
aroK		shikimate kinase AroK	4	5	1.25	1	1666				521	521	521	1c58dc8b1c0b0cb7c89dc05980566ffe_7412	dcf007684d8598380507220e605e8e2c_6956	7ef7127a3f11d26e5ed74c78ba404004_684	Pseudomonase_1_06192 Pseudomonase_1_05795
slyD		peptidylprolyl isomerase	4	5	1.25	1	1705				587	590	588	1c58dc8b1c0b0cb7c89dc05980566ffe_7466	dcf007684d8598380507220e605e8e2c_6884	7ef7127a3f11d26e5ed74c78ba404004_756	Pseudomonase_1_06164 Pseudomonase_1_05832
yheO		transcriptional regulator	4	5	1.25	1	1708				722	722	722	1c58dc8b1c0b0cb7c89dc05980566ffe_7472	dcf007684d8598380507220e605e8e2c_6878	7ef7127a3f11d26e5ed74c78ba404004_762	Pseudomonase_1_06161 Pseudomonase_1_05835
rpsE		30S ribosomal protein S5	4	5	1.25	1	2055				503	503	503	1c58dc8b1c0b0cb7c89dc05980566ffe_7530	dcf007684d8598380507220e605e8e2c_6800	7ef7127a3f11d26e5ed74c78ba404004_848	Pseudomonase_1_09676 Pseudomonase_1_09826
rpmD		50S ribosomal protein L30	4	5	1.25	1	2054				179	179	179	1c58dc8b1c0b0cb7c89dc05980566ffe_7532	dcf007684d8598380507220e605e8e2c_6798	7ef7127a3f11d26e5ed74c78ba404004_850	Pseudomonase_1_09677 Pseudomonase_1_09827
rplO		50S ribosomal protein L15	4	5	1.25	1	2053				434	434	434	1c58dc8b1c0b0cb7c89dc05980566ffe_7534	dcf007684d8598380507220e605e8e2c_6796	7ef7127a3f11d26e5ed74c78ba404004_852	Pseudomonase_1_09678 Pseudomonase_1_09828
fabR		HTH-type transcriptional repressor FabR	4	5	1.25	1	1618				635	704	654	1c58dc8b1c0b0cb7c89dc05980566ffe_6411	dcf007684d8598380507220e605e8e2c_8240	7ef7127a3f11d26e5ed74c78ba404004_9534	Pseudomonase_1_08344 Pseudomonase_1_07924
trkA		Trk system potassium transporter TrkA	4	5	1.25	1	2039				1376	1376	1376	1c58dc8b1c0b0cb7c89dc05980566ffe_7558	dcf007684d8598380507220e605e8e2c_6776	7ef7127a3f11d26e5ed74c78ba404004_876	Pseudomonase_1_09690 Pseudomonase_1_09840
dusB		tRNA dihydrouridine synthase DusB	4	5	1.25	1	1987				965	965	965	1c58dc8b1c0b0cb7c89dc05980566ffe_7651	dcf007684d8598380507220e605e8e2c_6732	7ef7127a3f11d26e5ed74c78ba404004_941	Pseudomonase_1_04581 Pseudomonase_1_03904
prmA		50S ribosomal protein L11 methyltransferase	4	5	1.25	1	1986				881	881	881	1c58dc8b1c0b0cb7c89dc05980566ffe_7653	dcf007684d8598380507220e605e8e2c_6730	7ef7127a3f11d26e5ed74c78ba404004_943	Pseudomonase_1_04580 Pseudomonase_1_03903
accC		acetyl-CoA carboxylase biotin carboxylase subunit	4	5	1.25	1	1982				1349	1349	1349	1c58dc8b1c0b0cb7c89dc05980566ffe_7659	dcf007684d8598380507220e605e8e2c_6708	7ef7127a3f11d26e5ed74c78ba404004_965	Pseudomonase_1_04577 Pseudomonase_1_03892
mreC		rod shape-determining protein MreC	4	5	1.25	1	1976				992	1103	1058	1c58dc8b1c0b0cb7c89dc05980566ffe_7675	dcf007684d8598380507220e605e8e2c_6696	7ef7127a3f11d26e5ed74c78ba404004_977	Pseudomonase_1_04570 Pseudomonase_1_03886
rng		ribonuclease G	4	5	1.25	1	1973				1469	1469	1469	1c58dc8b1c0b0cb7c89dc05980566ffe_7681	dcf007684d8598380507220e605e8e2c_6690	7ef7127a3f11d26e5ed74c78ba404004_983	Pseudomonase_1_04567 Pseudomonase_1_03883
aaeX		p-hydroxybenzoic acid efflux pump operon protein AaeX	4	5	1.25	1	1969				203	203	203	1c58dc8b1c0b0cb7c89dc05980566ffe_7689	dcf007684d8598380507220e605e8e2c_6682	7ef7127a3f11d26e5ed74c78ba404004_991	Pseudomonase_1_04563 Pseudomonase_1_03879
npr		PTS phosphocarrier protein NPr	4	5	1.25	1	1918				272	272	272	1c58dc8b1c0b0cb7c89dc05980566ffe_7743	dcf007684d8598380507220e605e8e2c_6624	7ef7127a3f11d26e5ed74c78ba404004_1049	Pseudomonase_1_04537 Pseudomonase_1_03850
rapZ		RNase adapter RapZ	4	5	1.25	1	1917				854	854	854	1c58dc8b1c0b0cb7c89dc05980566ffe_7745	dcf007684d8598380507220e605e8e2c_6622	7ef7127a3f11d26e5ed74c78ba404004_1051	Pseudomonase_1_04536 Pseudomonase_1_03849
lptB		LPS export ABC transporter ATP-binding protein	4	5	1.25	1	1913				725	725	725	1c58dc8b1c0b0cb7c89dc05980566ffe_7753	dcf007684d8598380507220e605e8e2c_6614	7ef7127a3f11d26e5ed74c78ba404004_1059	Pseudomonase_1_04532 Pseudomonase_1_03845
icd		Isocitrate dehydrogenase [NADP]	4	9	2.25	1	10973				152	1250	755	1c58dc8b1c0b0cb7c89dc05980566ffe_2503	dcf007684d8598380507220e605e8e2c_2301 dcf007684d8598380507220e605e8e2c_2313	7ef7127a3f11d26e5ed74c78ba404004_5682 7ef7127a3f11d26e5ed74c78ba404004_5528	Pseudomonase_1_08826 Pseudomonase_1_09297 Pseudomonase_1_08821 Pseudomonase_1_04647
rplP		50S ribosomal protein L16	4	5	1.25	1	2065				199	410	367	1c58dc8b1c0b0cb7c89dc05980566ffe_7510	dcf007684d8598380507220e605e8e2c_6816	7ef7127a3f11d26e5ed74c78ba404004_828	Pseudomonase_1_09666 Pseudomonase_1_10048
rplU		50S ribosomal protein L21	4	5	1.25	1	1898				311	311	311	1c58dc8b1c0b0cb7c89dc05980566ffe_7783	dcf007684d8598380507220e605e8e2c_6584	7ef7127a3f11d26e5ed74c78ba404004_1089	Pseudomonase_1_04517 Pseudomonase_1_03830
rlmE		23S rRNA (uridine(2552)-2'-O)-methyltransferase RlmE	4	5	1.25	1	1874				629	629	629	1c58dc8b1c0b0cb7c89dc05980566ffe_7797	dcf007684d8598380507220e605e8e2c_6570	7ef7127a3f11d26e5ed74c78ba404004_1103	Pseudomonase_1_04510 Pseudomonase_1_03823
argG		argininosuccinate synthase	4	5	1.25	1	1865				1343	1343	1343	1c58dc8b1c0b0cb7c89dc05980566ffe_7816	dcf007684d8598380507220e605e8e2c_6555	7ef7127a3f11d26e5ed74c78ba404004_1118	Pseudomonase_1_04501 Pseudomonase_1_03815
rimP		ribosome maturation factor RimP	4	5	1.25	1	1860				452	452	452	1c58dc8b1c0b0cb7c89dc05980566ffe_7821	dcf007684d8598380507220e605e8e2c_6550	7ef7127a3f11d26e5ed74c78ba404004_1123	Pseudomonase_1_04499 Pseudomonase_1_03813
nusA		transcription termination factor NusA	4	5	1.25	1	1859				1487	1487	1487	1c58dc8b1c0b0cb7c89dc05980566ffe_7823	dcf007684d8598380507220e605e8e2c_6548	7ef7127a3f11d26e5ed74c78ba404004_1125	Pseudomonase_1_04498 Pseudomonase_1_03812
rbfA		30S ribosome-binding factor RbfA	4	5	1.25	1	1857				401	401	401	1c58dc8b1c0b0cb7c89dc05980566ffe_7827	dcf007684d8598380507220e605e8e2c_6544	7ef7127a3f11d26e5ed74c78ba404004_1129	Pseudomonase_1_04496 Pseudomonase_1_03810
pnp		polyribonucleotide nucleotidyltransferase	4	5	1.25	1	1852				2135	2135	2135	1c58dc8b1c0b0cb7c89dc05980566ffe_7833	dcf007684d8598380507220e605e8e2c_6538	7ef7127a3f11d26e5ed74c78ba404004_1135	Pseudomonase_1_04493 Pseudomonase_1_03807
rplM		50S ribosomal protein L13	4	5	1.25	1	1945				428	503	443	1c58dc8b1c0b0cb7c89dc05980566ffe_7713	dcf007684d8598380507220e605e8e2c_6660	7ef7127a3f11d26e5ed74c78ba404004_1013	Pseudomonase_1_04551 Pseudomonase_1_03868
ubiU		U32 family peptidase	4	5	1.25	1	1845				995	995	995	1c58dc8b1c0b0cb7c89dc05980566ffe_7847	dcf007684d8598380507220e605e8e2c_6524	7ef7127a3f11d26e5ed74c78ba404004_1149	Pseudomonase_1_04487 Pseudomonase_1_03801
diaA		DnaA initiator-associating protein DiaA	4	5	1.25	1	1830				590	590	590	1c58dc8b1c0b0cb7c89dc05980566ffe_7865	dcf007684d8598380507220e605e8e2c_6506	7ef7127a3f11d26e5ed74c78ba404004_1167	Pseudomonase_1_04478 Pseudomonase_1_03792
garR		2-hydroxy-3-oxopropionate reductase	4	5	1.25	1	5132				890	890	890	1c58dc8b1c0b0cb7c89dc05980566ffe_7905	dcf007684d8598380507220e605e8e2c_6462	7ef7127a3f11d26e5ed74c78ba404004_1211	Pseudomonase_1_04457 Pseudomonase_1_03770
uxaC		glucuronate isomerase	4	5	1.25	1	5082				1412	1412	1412	1c58dc8b1c0b0cb7c89dc05980566ffe_7944	dcf007684d8598380507220e605e8e2c_6393	7ef7127a3f11d26e5ed74c78ba404004_1280	Pseudomonase_1_04439 Pseudomonase_1_03740
ygjG		putrescine aminotransferase	4	5	1.25	1	5063				1379	1490	1401	1c58dc8b1c0b0cb7c89dc05980566ffe_7982	dcf007684d8598380507220e605e8e2c_6355	7ef7127a3f11d26e5ed74c78ba404004_1318	Pseudomonase_1_04420 Pseudomonase_1_03721
rpoD		RNA polymerase sigma factor RpoD	4	5	1.25	1	5032				1841	1841	1841	1c58dc8b1c0b0cb7c89dc05980566ffe_8039	dcf007684d8598380507220e605e8e2c_6342	7ef7127a3f11d26e5ed74c78ba404004_1331	Pseudomonase_1_04393 Pseudomonase_1_03715
metK		methionine adenosyltransferase	4	5	1.25	1	3621				1154	1154	1154	1c58dc8b1c0b0cb7c89dc05980566ffe_8363	dcf007684d8598380507220e605e8e2c_5974	7ef7127a3f11d26e5ed74c78ba404004_1822	Pseudomonase_1_04302 Pseudomonase_1_07235
speA		biosynthetic arginine decarboxylase	4	5	1.25	1	3622				1976	1976	1976	1c58dc8b1c0b0cb7c89dc05980566ffe_8369	dcf007684d8598380507220e605e8e2c_5970	7ef7127a3f11d26e5ed74c78ba404004_1826	Pseudomonase_1_04301 Pseudomonase_1_07233
tkt		transketolase	4	5	1.25	1	3634				542	1991	1701	1c58dc8b1c0b0cb7c89dc05980566ffe_8407	dcf007684d8598380507220e605e8e2c_5962	7ef7127a3f11d26e5ed74c78ba404004_1834	Pseudomonase_1_07229 Pseudomonase_1_09799
pgk		phosphoglycerate kinase	4	5	1.25	1	3648				1163	1163	1163	1c58dc8b1c0b0cb7c89dc05980566ffe_8411	dcf007684d8598380507220e605e8e2c_5934	7ef7127a3f11d26e5ed74c78ba404004_1862	Pseudomonase_1_09797 Pseudomonase_1_07215
argP		DNA-binding transcriptional regulator ArgP	4	5	1.25	1	3655				893	893	893	1c58dc8b1c0b0cb7c89dc05980566ffe_8421	dcf007684d8598380507220e605e8e2c_5918	7ef7127a3f11d26e5ed74c78ba404004_1878	Pseudomonase_1_09792 Pseudomonase_1_07208
rpiA		ribose-5-phosphate isomerase RpiA	4	5	1.25	1	3669				659	659	659	1c58dc8b1c0b0cb7c89dc05980566ffe_8423	dcf007684d8598380507220e605e8e2c_5914	7ef7127a3f11d26e5ed74c78ba404004_1882	Pseudomonase_1_09791 Pseudomonase_1_07206
gcvA		glycine cleavage system transcriptional regulator GcvA	4	5	1.25	1	3881				917	917	917	1c58dc8b1c0b0cb7c89dc05980566ffe_8786	dcf007684d8598380507220e605e8e2c_5683	7ef7127a3f11d26e5ed74c78ba404004_2122	Pseudomonase_1_02505 Pseudomonase_1_08659
pyrG		CTP synthase (glutamine hydrolyzing)	4	5	1.25	1	3918				1637	1637	1637	1c58dc8b1c0b0cb7c89dc05980566ffe_8862	dcf007684d8598380507220e605e8e2c_5627	7ef7127a3f11d26e5ed74c78ba404004_2178	Pseudomonase_1_02542 Pseudomonase_1_08631
eno		phosphopyruvate hydratase	4	5	1.25	1	3929				1298	1298	1298	1c58dc8b1c0b0cb7c89dc05980566ffe_8864	dcf007684d8598380507220e605e8e2c_5625	7ef7127a3f11d26e5ed74c78ba404004_2180	Pseudomonase_1_02543 Pseudomonase_1_08630
accD		acetyl-CoA carboxylase, carboxyltransferase subunit beta	4	5	1.25	1	9536				914	983	929	1c58dc8b1c0b0cb7c89dc05980566ffe_9690	dcf007684d8598380507220e605e8e2c_4724	7ef7127a3f11d26e5ed74c78ba404004_3141	Pseudomonase_1_03402 Pseudomonase_1_00321
cysH		phosphoadenosine phosphosulfate reductase	4	5	1.25	1	4137				734	734	734	1c58dc8b1c0b0cb7c89dc05980566ffe_8876	dcf007684d8598380507220e605e8e2c_5577	7ef7127a3f11d26e5ed74c78ba404004_2228	Pseudomonase_1_02549 Pseudomonase_1_08606
cysD		sulfate adenylyltransferase subunit CysD	4	5	1.25	1	4141				908	908	908	1c58dc8b1c0b0cb7c89dc05980566ffe_8882	dcf007684d8598380507220e605e8e2c_5571	7ef7127a3f11d26e5ed74c78ba404004_2234	Pseudomonase_1_02552 Pseudomonase_1_09622
ispF		2-C-methyl-D-erythritol 2,4-cyclodiphosphate synthase	4	5	1.25	1	4151				479	479	479	1c58dc8b1c0b0cb7c89dc05980566ffe_8894	dcf007684d8598380507220e605e8e2c_5559	7ef7127a3f11d26e5ed74c78ba404004_2246	Pseudomonase_1_02558 Pseudomonase_1_09616
hycE		formate hydrogenlyase subunit HycE	4	5	1.25	1	4204				1709	1709	1709	1c58dc8b1c0b0cb7c89dc05980566ffe_8996	dcf007684d8598380507220e605e8e2c_5487	7ef7127a3f11d26e5ed74c78ba404004_2320	Pseudomonase_1_02606 Pseudomonase_1_08052
uvrC		excinuclease ABC subunit UvrC	4	5	1.25	1	10682				1766	1832	1818	1c58dc8b1c0b0cb7c89dc05980566ffe_10370	dcf007684d8598380507220e605e8e2c_3718	7ef7127a3f11d26e5ed74c78ba404004_4121	Pseudomonase_1_05933 Pseudomonase_1_00950
nadK		NAD(+) kinase	4	5	1.25	1	3324				878	878	878	1c58dc8b1c0b0cb7c89dc05980566ffe_9206	dcf007684d8598380507220e605e8e2c_5334	7ef7127a3f11d26e5ed74c78ba404004_2470	Pseudomonase_1_02790 Pseudomonase_1_08123
ffh		signal recognition particle protein	4	5	1.25	1	3320				1361	1364	1362	1c58dc8b1c0b0cb7c89dc05980566ffe_9214	dcf007684d8598380507220e605e8e2c_5326	7ef7127a3f11d26e5ed74c78ba404004_2478	Pseudomonase_1_02794 Pseudomonase_1_08127
rpoE		RNA polymerase sigma factor RpoE	4	5	1.25	1	3286				575	575	575	1c58dc8b1c0b0cb7c89dc05980566ffe_9293	dcf007684d8598380507220e605e8e2c_5255	7ef7127a3f11d26e5ed74c78ba404004_2700	Pseudomonase_1_03209 Pseudomonase_1_09356
lepA		translation elongation factor 4	4	5	1.25	1	3282				1799	1799	1799	1c58dc8b1c0b0cb7c89dc05980566ffe_9301	dcf007684d8598380507220e605e8e2c_5247	7ef7127a3f11d26e5ed74c78ba404004_2692	Pseudomonase_1_03214 Pseudomonase_1_09360
rnc		ribonuclease III	4	5	1.25	1	3280				680	680	680	1c58dc8b1c0b0cb7c89dc05980566ffe_9305	dcf007684d8598380507220e605e8e2c_5243	7ef7127a3f11d26e5ed74c78ba404004_2688	Pseudomonase_1_03216 Pseudomonase_1_09362
era		GTPase Era	4	5	1.25	1	3279				905	905	905	1c58dc8b1c0b0cb7c89dc05980566ffe_9307	dcf007684d8598380507220e605e8e2c_5241	7ef7127a3f11d26e5ed74c78ba404004_2686	Pseudomonase_1_03217 Pseudomonase_1_09363
iscU		Fe-S cluster assembly scaffold IscU	4	5	1.25	1	3182				386	386	386	1c58dc8b1c0b0cb7c89dc05980566ffe_9367	dcf007684d8598380507220e605e8e2c_5177	7ef7127a3f11d26e5ed74c78ba404004_2761	Pseudomonase_1_03247 Pseudomonase_1_00504
iscX		Fe-S cluster assembly protein IscX	4	5	1.25	1	3173				200	200	200	1c58dc8b1c0b0cb7c89dc05980566ffe_9377	dcf007684d8598380507220e605e8e2c_5167	7ef7127a3f11d26e5ed74c78ba404004_2771	Pseudomonase_1_03252 Pseudomonase_1_00499
ndk		nucleoside-diphosphate kinase	4	5	1.25	1	3164				431	431	431	1c58dc8b1c0b0cb7c89dc05980566ffe_9391	dcf007684d8598380507220e605e8e2c_5153	7ef7127a3f11d26e5ed74c78ba404004_2785	Pseudomonase_1_03259 Pseudomonase_1_00493
guaB		IMP dehydrogenase	4	5	1.25	1	3145				1466	1466	1466	1c58dc8b1c0b0cb7c89dc05980566ffe_9413	dcf007684d8598380507220e605e8e2c_5127	7ef7127a3f11d26e5ed74c78ba404004_2811	Pseudomonase_1_03270 Pseudomonase_1_00479
guaA		glutamine-hydrolyzing GMP synthase	4	5	1.25	1	3144				1577	1577	1577	1c58dc8b1c0b0cb7c89dc05980566ffe_9415	dcf007684d8598380507220e605e8e2c_5125	7ef7127a3f11d26e5ed74c78ba404004_2813	Pseudomonase_1_03271 Pseudomonase_1_00478
bcp		thioredoxin-dependent thiol peroxidase	4	5	1.25	1	3123				470	470	470	1c58dc8b1c0b0cb7c89dc05980566ffe_9457	dcf007684d8598380507220e605e8e2c_5093	7ef7127a3f11d26e5ed74c78ba404004_2845	Pseudomonase_1_03292 Pseudomonase_1_00462
eutM		ethanolamine utilization microcompartment protein EutM	4	5	1.25	1	3070				290	293	291	1c58dc8b1c0b0cb7c89dc05980566ffe_9505	dcf007684d8598380507220e605e8e2c_5043	7ef7127a3f11d26e5ed74c78ba404004_2895	Pseudomonase_1_03315 Pseudomonase_1_00437
cysT		sulfate/thiosulfate ABC transporter permease CysT	4	5	1.25	1	3049				833	833	833	1c58dc8b1c0b0cb7c89dc05980566ffe_9545	dcf007684d8598380507220e605e8e2c_4997	7ef7127a3f11d26e5ed74c78ba404004_2941	Pseudomonase_1_03334 Pseudomonase_1_00415
ptsI		phosphoenolpyruvate-protein phosphotransferase PtsI	4	5	1.25	1	3019				1727	1727	1727	1c58dc8b1c0b0cb7c89dc05980566ffe_9563	dcf007684d8598380507220e605e8e2c_4983	7ef7127a3f11d26e5ed74c78ba404004_2955	Pseudomonase_1_03343 Pseudomonase_1_00408
cysK		cysteine synthase A	4	5	1.25	1	3017				971	971	971	1c58dc8b1c0b0cb7c89dc05980566ffe_9567	dcf007684d8598380507220e605e8e2c_4979	7ef7127a3f11d26e5ed74c78ba404004_2959	Pseudomonase_1_03345 Pseudomonase_1_00406
gltX		glutamate--tRNA ligase	4	5	1.25	1	3007				1415	1418	1416	1c58dc8b1c0b0cb7c89dc05980566ffe_9593	dcf007684d8598380507220e605e8e2c_4955	7ef7127a3f11d26e5ed74c78ba404004_2998	Pseudomonase_1_03356 Pseudomonase_1_00389
alaC		alanine transaminase	4	5	1.25	1	2985				1214	1238	1228	1c58dc8b1c0b0cb7c89dc05980566ffe_9629	dcf007684d8598380507220e605e8e2c_4915	7ef7127a3f11d26e5ed74c78ba404004_3038	Pseudomonase_1_03371 Pseudomonase_1_00370
fabB		beta-ketoacyl-ACP synthase I	4	5	1.25	1	9527				1220	1220	1220	1c58dc8b1c0b0cb7c89dc05980566ffe_9676	dcf007684d8598380507220e605e8e2c_4738	7ef7127a3f11d26e5ed74c78ba404004_3127	Pseudomonase_1_03395 Pseudomonase_1_00328
purF		amidophosphoribosyltransferase	4	5	1.25	1	9542				1517	1517	1517	1c58dc8b1c0b0cb7c89dc05980566ffe_9698	dcf007684d8598380507220e605e8e2c_4716	7ef7127a3f11d26e5ed74c78ba404004_3149	Pseudomonase_1_03406 Pseudomonase_1_00317
pta		phosphate acetyltransferase	4	5	1.25	1	9558				2144	2147	2145	1c58dc8b1c0b0cb7c89dc05980566ffe_9730	dcf007684d8598380507220e605e8e2c_4686	7ef7127a3f11d26e5ed74c78ba404004_3179	Pseudomonase_1_03420 Pseudomonase_1_00302
ackA		acetate kinase	4	5	1.25	1	9559				1202	1202	1202	1c58dc8b1c0b0cb7c89dc05980566ffe_9732	dcf007684d8598380507220e605e8e2c_4684	7ef7127a3f11d26e5ed74c78ba404004_3181	Pseudomonase_1_03421 Pseudomonase_1_00301
alaA		alanine transaminase AlaA	4	5	1.25	1	9567				1217	1217	1217	1c58dc8b1c0b0cb7c89dc05980566ffe_9744	dcf007684d8598380507220e605e8e2c_4672	7ef7127a3f11d26e5ed74c78ba404004_3193	Pseudomonase_1_03427 Pseudomonase_1_00295
nuoC		NADH-quinone oxidoreductase subunit C/D	4	5	1.25	1	9572				1802	1808	1804	1c58dc8b1c0b0cb7c89dc05980566ffe_9752	dcf007684d8598380507220e605e8e2c_4664	7ef7127a3f11d26e5ed74c78ba404004_3201	Pseudomonase_1_03431 Pseudomonase_1_00290
nuoE		NADH-quinone oxidoreductase subunit NuoE	4	5	1.25	1	9573				500	500	500	1c58dc8b1c0b0cb7c89dc05980566ffe_9754	dcf007684d8598380507220e605e8e2c_4662	7ef7127a3f11d26e5ed74c78ba404004_3203	Pseudomonase_1_03432 Pseudomonase_1_00289
nuoF		NADH-quinone oxidoreductase subunit NuoF	4	5	1.25	1	9574				1337	1337	1337	1c58dc8b1c0b0cb7c89dc05980566ffe_9756	dcf007684d8598380507220e605e8e2c_4660	7ef7127a3f11d26e5ed74c78ba404004_3205	Pseudomonase_1_03433 Pseudomonase_1_00288
menB		1,4-dihydroxy-2-naphthoyl-CoA synthase	4	5	1.25	1	9614				857	857	857	1c58dc8b1c0b0cb7c89dc05980566ffe_9784	dcf007684d8598380507220e605e8e2c_4624	7ef7127a3f11d26e5ed74c78ba404004_3241	Pseudomonase_1_03447 Pseudomonase_1_00270
nrdB		ribonucleotide-diphosphate reductase subunit beta	4	5	1.25	1	9648				1130	1130	1130	1c58dc8b1c0b0cb7c89dc05980566ffe_9818	dcf007684d8598380507220e605e8e2c_4568	7ef7127a3f11d26e5ed74c78ba404004_3297	Pseudomonase_1_03464 Pseudomonase_1_00241
rcsB		transcriptional regulator RcsB	4	5	1.25	1	9653				650	650	650	1c58dc8b1c0b0cb7c89dc05980566ffe_9828	dcf007684d8598380507220e605e8e2c_4534	7ef7127a3f11d26e5ed74c78ba404004_3331	Pseudomonase_1_03469 Pseudomonase_1_00223
fruK		1-phosphofructokinase	4	5	1.25	1	9700				938	938	938	1c58dc8b1c0b0cb7c89dc05980566ffe_9929	dcf007684d8598380507220e605e8e2c_4435	7ef7127a3f11d26e5ed74c78ba404004_3428	Pseudomonase_1_03530 Pseudomonase_1_00175
fbaB		class I fructose-bisphosphate aldolase	4	5	1.25	1	9762				1052	1052	1052	1c58dc8b1c0b0cb7c89dc05980566ffe_10030	dcf007684d8598380507220e605e8e2c_4292	7ef7127a3f11d26e5ed74c78ba404004_3569	Pseudomonase_1_09254 Pseudomonase_1_00103
yegQ		tRNA 5-hydroxyuridine modification protein YegQ	4	5	1.25	1	9772				1361	1361	1361	1c58dc8b1c0b0cb7c89dc05980566ffe_10052	dcf007684d8598380507220e605e8e2c_4272	7ef7127a3f11d26e5ed74c78ba404004_3589	Pseudomonase_1_09237 Pseudomonase_1_00093
dcd		dCTP deaminase	4	5	1.25	1	9787				581	581	581	1c58dc8b1c0b0cb7c89dc05980566ffe_10082	dcf007684d8598380507220e605e8e2c_4230	7ef7127a3f11d26e5ed74c78ba404004_3631	Pseudomonase_1_09063 Pseudomonase_1_00074
gndA		NADP-dependent phosphogluconate dehydrogenase	4	5	1.25	1	9821				1406	1406	1406	1c58dc8b1c0b0cb7c89dc05980566ffe_10122	dcf007684d8598380507220e605e8e2c_4158	7ef7127a3f11d26e5ed74c78ba404004_3697	Pseudomonase_1_09082 Pseudomonase_1_00041
hisF		imidazole glycerol phosphate synthase subunit HisF	4	5	1.25	1	9849				776	776	776	1c58dc8b1c0b0cb7c89dc05980566ffe_10150	dcf007684d8598380507220e605e8e2c_4150	7ef7127a3f11d26e5ed74c78ba404004_3705	Pseudomonase_1_09100 Pseudomonase_1_00037
plaP		putrescine/proton symporter PlaP	4	5	1.25	1	9863				1358	1358	1358	1c58dc8b1c0b0cb7c89dc05980566ffe_10173	dcf007684d8598380507220e605e8e2c_4123	7ef7127a3f11d26e5ed74c78ba404004_3732	Pseudomonase_1_09109 Pseudomonase_1_00026
tmaR		DUF496 family protein	4	5	1.25	1	10751				323	329	326	1c58dc8b1c0b0cb7c89dc05980566ffe_10189	dcf007684d8598380507220e605e8e2c_4113	7ef7127a3f11d26e5ed74c78ba404004_3742	Pseudomonase_1_05876 Pseudomonase_1_00021
WP_000572033.1		replication/maintenance protein RepL	4	5	1.25	1	10130				569	581	576	1c58dc8b1c0b0cb7c89dc05980566ffe_10273	dcf007684d8598380507220e605e8e2c_3868	7ef7127a3f11d26e5ed74c78ba404004_3973	Pseudomonase_1_00834 Pseudomonase_1_00878
ruvC		crossover junction endodeoxyribonuclease RuvC	4	5	1.25	1	10479				521	521	521	1c58dc8b1c0b0cb7c89dc05980566ffe_10447	dcf007684d8598380507220e605e8e2c_3619	7ef7127a3f11d26e5ed74c78ba404004_4218	Pseudomonase_1_06013 Pseudomonase_1_01019
ruvA		Holliday junction branch migration protein RuvA	4	5	1.25	1	10469				611	611	611	1c58dc8b1c0b0cb7c89dc05980566ffe_10449	dcf007684d8598380507220e605e8e2c_3613	7ef7127a3f11d26e5ed74c78ba404004_4224	Pseudomonase_1_06014 Pseudomonase_1_01021
ruvB		Holliday junction branch migration DNA helicase RuvB	4	5	1.25	1	10468				1010	1010	1010	1c58dc8b1c0b0cb7c89dc05980566ffe_10451	dcf007684d8598380507220e605e8e2c_3611	7ef7127a3f11d26e5ed74c78ba404004_4226	Pseudomonase_1_06015 Pseudomonase_1_01022
pyk		pyruvate kinase	4	5	1.25	1	10462				1442	1442	1442	1c58dc8b1c0b0cb7c89dc05980566ffe_10463	dcf007684d8598380507220e605e8e2c_3599	7ef7127a3f11d26e5ed74c78ba404004_4238	Pseudomonase_1_06021 Pseudomonase_1_01028
zwf		glucose-6-phosphate dehydrogenase	4	5	1.25	1	10460				1475	1475	1475	1c58dc8b1c0b0cb7c89dc05980566ffe_10469	dcf007684d8598380507220e605e8e2c_3595	7ef7127a3f11d26e5ed74c78ba404004_4242	Pseudomonase_1_06023 Pseudomonase_1_01031
minD		septum site-determining protein MinD	4	5	1.25	1	10367				812	812	812	1c58dc8b1c0b0cb7c89dc05980566ffe_10585	dcf007684d8598380507220e605e8e2c_2355	7ef7127a3f11d26e5ed74c78ba404004_5486	Pseudomonase_1_06072 Pseudomonase_1_04664
metG		methionine--tRNA ligase	4	5	1.25	1	9751				2033	2042	2034	1c58dc8b1c0b0cb7c89dc05980566ffe_10007	dcf007684d8598380507220e605e8e2c_4327	7ef7127a3f11d26e5ed74c78ba404004_3534	Pseudomonase_1_00120 Pseudomonase_1_09265
ftsH		ATP-dependent zinc metalloprotease FtsH	4	5	1.25	1	1873				1934	1943	1937	1c58dc8b1c0b0cb7c89dc05980566ffe_7799	dcf007684d8598380507220e605e8e2c_6568	7ef7127a3f11d26e5ed74c78ba404004_1105	Pseudomonase_1_03822 Pseudomonase_1_04509
yeeT		DUF987 domain-containing protein	3	10	3.34	1	5982				221	221	221		dcf007684d8598380507220e605e8e2c_4099	7ef7127a3f11d26e5ed74c78ba404004_3756 7ef7127a3f11d26e5ed74c78ba404004_8623 7ef7127a3f11d26e5ed74c78ba404004_7529 7ef7127a3f11d26e5ed74c78ba404004_6159 7ef7127a3f11d26e5ed74c78ba404004_1629	Pseudomonase_1_00017 Pseudomonase_1_09902 Pseudomonase_1_09149 Pseudomonase_1_03564
WP_001445422.1		hypothetical protein	3	3	1	1	4935	327	5		758	770	762		dcf007684d8598380507220e605e8e2c_6145	7ef7127a3f11d26e5ed74c78ba404004_1528	Pseudomonase_1_03616
WP_001298372.1		iron ABC transporter permease	3	3	1	1	4985	310	46		1037	1049	1041		dcf007684d8598380507220e605e8e2c_6247	7ef7127a3f11d26e5ed74c78ba404004_1426	Pseudomonase_1_03669
yciQ		DUF2207 domain-containing protein	3	3	1	1	8154	309	25		1889	1892	1890		dcf007684d8598380507220e605e8e2c_2563	7ef7127a3f11d26e5ed74c78ba404004_5280	Pseudomonase_1_04763
yhjG		AsmA family protein	3	3	1	1	2683	366	10		2060	2075	2065		dcf007684d8598380507220e605e8e2c_7294	7ef7127a3f11d26e5ed74c78ba404004_390	Pseudomonase_1_05650
yhiM		DUF2776 family protein	3	3	1	1	4455	343	4		1052	1064	1056		dcf007684d8598380507220e605e8e2c_7168	7ef7127a3f11d26e5ed74c78ba404004_472	Pseudomonase_1_05691
WP_001298216.1		RecQ family ATP-dependent DNA helicase	3	3	1	1	4337	333	4		2096	2099	2097		dcf007684d8598380507220e605e8e2c_7068	7ef7127a3f11d26e5ed74c78ba404004_572	Pseudomonase_1_05739
hofM		DNA utilization protein HofM	3	3	1	1	4375	395	6		779	782	780		dcf007684d8598380507220e605e8e2c_6966	7ef7127a3f11d26e5ed74c78ba404004_674	Pseudomonase_1_05791
recQ		ATP-dependent DNA helicase RecQ	3	3	1	1	2179	328	35		1829	1835	1831		dcf007684d8598380507220e605e8e2c_7920	7ef7127a3f11d26e5ed74c78ba404004_9866	Pseudomonase_1_07987
ascG		DNA-binding transcriptional regulator AscG	3	3	1	1	3400	345	18		1010	1013	1011		dcf007684d8598380507220e605e8e2c_5469	7ef7127a3f11d26e5ed74c78ba404004_2338	Pseudomonase_1_08061
queD		6-carboxytetrahydropterin synthase QueD	3	3	1	1	3462	349	21		362	365	363		dcf007684d8598380507220e605e8e2c_5583	7ef7127a3f11d26e5ed74c78ba404004_2222	Pseudomonase_1_08609
dnaQ		DNA polymerase III subunit epsilon	3	3	1	1	5346	336	26		731	740	734		dcf007684d8598380507220e605e8e2c_439	7ef7127a3f11d26e5ed74c78ba404004_7840	Pseudomonase_1_08855
tssM		type VI secretion system membrane subunit TssM	3	3	1	1	5342	336	22		3467	3527	3487		dcf007684d8598380507220e605e8e2c_450	7ef7127a3f11d26e5ed74c78ba404004_7829	Pseudomonase_1_08860
yafL		C40 family peptidase	3	3	1	1	5284	354	20		749	758	752		dcf007684d8598380507220e605e8e2c_506	7ef7127a3f11d26e5ed74c78ba404004_7699	Pseudomonase_1_08890
flhA_2		flagellar biosynthesis protein FlhA	3	3	1	1	5286	354	18		1712	1739	1721		dcf007684d8598380507220e605e8e2c_510	7ef7127a3f11d26e5ed74c78ba404004_7695	Pseudomonase_1_08892
ykgM		type B 50S ribosomal protein L31	3	3	1	1	4829	357	3		263	266	264		dcf007684d8598380507220e605e8e2c_602	7ef7127a3f11d26e5ed74c78ba404004_7481	Pseudomonase_1_09130
mfd		transcription-repair coupling factor	3	3	1	1	530	352	15		3446	3494	3462		dcf007684d8598380507220e605e8e2c_2257	7ef7127a3f11d26e5ed74c78ba404004_5726	Pseudomonase_1_09320
group_10829		hypothetical protein	3	3	1	1	7941	1	194		149	155	151		dcf007684d8598380507220e605e8e2c_9217	7ef7127a3f11d26e5ed74c78ba404004_8613	Pseudomonase_1_09907
group_10865	vgrG	type VI secretion system tip protein VgrG	3	3	1	1	6115	5	115		2516	2519	2517		dcf007684d8598380507220e605e8e2c_5715	7ef7127a3f11d26e5ed74c78ba404004_2081	Pseudomonase_1_09979
WP_001298149.1		type VI secretion protein VasK	3	3	1	1	6119	5	119		3326	3383	3345		dcf007684d8598380507220e605e8e2c_5723	7ef7127a3f11d26e5ed74c78ba404004_2073	Pseudomonase_1_09983
tssA		type VI secretion system protein TssA	3	3	1	1	6120	5	120		1610	1637	1619		dcf007684d8598380507220e605e8e2c_5725	7ef7127a3f11d26e5ed74c78ba404004_2071	Pseudomonase_1_09984
cpsG		colanic acid biosynthesis phosphomannomutase CpsG	3	7	2.34	1	9818				413	1370	973		dcf007684d8598380507220e605e8e2c_4162 dcf007684d8598380507220e605e8e2c_4196 dcf007684d8598380507220e605e8e2c_4194	7ef7127a3f11d26e5ed74c78ba404004_3695 7ef7127a3f11d26e5ed74c78ba404004_3665	Pseudomonase_1_00042 Pseudomonase_1_00057
pheM		pheST operon leader peptide PheM	3	3	1	1	8287	543	1		44	44	44	1c58dc8b1c0b0cb7c89dc05980566ffe_264	dcf007684d8598380507220e605e8e2c_3319	7ef7127a3f11d26e5ed74c78ba404004_4519
WP_001275823.1		hypothetical protein	3	4	1.34	1	8009				368	368	368		dcf007684d8598380507220e605e8e2c_9021	7ef7127a3f11d26e5ed74c78ba404004_1759 7ef7127a3f11d26e5ed74c78ba404004_8829	Pseudomonase_1_00720
WP_001363619.1		fimbria/pilus periplasmic chaperone	3	4	1.34	1	8028				719	719	719		dcf007684d8598380507220e605e8e2c_9037	7ef7127a3f11d26e5ed74c78ba404004_1743 7ef7127a3f11d26e5ed74c78ba404004_8813	Pseudomonase_1_00728
rbsK		ribokinase	3	4	1.34	1	8053				920	920	920		dcf007684d8598380507220e605e8e2c_9175	7ef7127a3f11d26e5ed74c78ba404004_1667 7ef7127a3f11d26e5ed74c78ba404004_6316	Pseudomonase_1_09806
fucP		L-fucose:H+ symporter permease	3	4	1.34	1	8054				1316	1316	1316		dcf007684d8598380507220e605e8e2c_9173	7ef7127a3f11d26e5ed74c78ba404004_1669 7ef7127a3f11d26e5ed74c78ba404004_6314	Pseudomonase_1_09805
WP_000261302.1		protein papJ	3	4	1.34	1	8029				581	581	581		dcf007684d8598380507220e605e8e2c_9035	7ef7127a3f11d26e5ed74c78ba404004_1745 7ef7127a3f11d26e5ed74c78ba404004_8815	Pseudomonase_1_00727
rpsC		30S ribosomal protein S3	3	4	1.34	1	2066				698	701	699	1c58dc8b1c0b0cb7c89dc05980566ffe_7508		7ef7127a3f11d26e5ed74c78ba404004_826	Pseudomonase_1_09665 Pseudomonase_1_10047
rpsK		30S ribosomal protein S11	3	4	1.34	1	2049				389	389	389	1c58dc8b1c0b0cb7c89dc05980566ffe_7542		7ef7127a3f11d26e5ed74c78ba404004_860	Pseudomonase_1_09682 Pseudomonase_1_09832
WP_000597719.1		type 1 fimbrial protein	3	4	1.34	1	8030				536	536	536		dcf007684d8598380507220e605e8e2c_9033	7ef7127a3f11d26e5ed74c78ba404004_1747 7ef7127a3f11d26e5ed74c78ba404004_8817	Pseudomonase_1_00726
papC		P fimbrial usher protein PapC	3	4	1.34	1	8027				2510	2519	2512		dcf007684d8598380507220e605e8e2c_9039	7ef7127a3f11d26e5ed74c78ba404004_1741 7ef7127a3f11d26e5ed74c78ba404004_8811	Pseudomonase_1_00729
WP_000335706.1		YfjI family protein	3	4	1.34	1	5503				1433	1433	1433		dcf007684d8598380507220e605e8e2c_551	7ef7127a3f11d26e5ed74c78ba404004_6346 7ef7127a3f11d26e5ed74c78ba404004_7654	Pseudomonase_1_08912
rpoA		DNA-directed RNA polymerase subunit alpha	3	4	1.34	1	2045				989	989	989	1c58dc8b1c0b0cb7c89dc05980566ffe_7546		7ef7127a3f11d26e5ed74c78ba404004_864	Pseudomonase_1_09684 Pseudomonase_1_09834
rplC		50S ribosomal protein L3	3	4	1.34	1	2072				629	629	629	1c58dc8b1c0b0cb7c89dc05980566ffe_7496		7ef7127a3f11d26e5ed74c78ba404004_814	Pseudomonase_1_09659 Pseudomonase_1_10041
WP_001186726.1		RadC family protein	3	8	2.67	1	4511				476	476	476		dcf007684d8598380507220e605e8e2c_4097	7ef7127a3f11d26e5ed74c78ba404004_1631 7ef7127a3f11d26e5ed74c78ba404004_3758 7ef7127a3f11d26e5ed74c78ba404004_6161 7ef7127a3f11d26e5ed74c78ba404004_8625	Pseudomonase_1_00016 Pseudomonase_1_03563 Pseudomonase_1_09901
WP_001531933.1		outer membrane beta-barrel protein	3	4	1.34	1	8005				740	740	740		dcf007684d8598380507220e605e8e2c_9019	7ef7127a3f11d26e5ed74c78ba404004_1761 7ef7127a3f11d26e5ed74c78ba404004_8831	Pseudomonase_1_00719
dsdA		D-serine ammonia-lyase	3	5	1.67	1	674				1328	1328	1328		dcf007684d8598380507220e605e8e2c_4887	7ef7127a3f11d26e5ed74c78ba404004_3066 7ef7127a3f11d26e5ed74c78ba404004_8705	Pseudomonase_1_00357 Pseudomonase_1_00780
rplA		50S ribosomal protein L1	3	4	1.34	1	2258				704	704	704	1c58dc8b1c0b0cb7c89dc05980566ffe_6168		7ef7127a3f11d26e5ed74c78ba404004_9485	Pseudomonase_1_05846 Pseudomonase_1_06150
WP_001234571.1		DUF945 domain-containing protein	3	4	1.34	1	6007				821	821	821		dcf007684d8598380507220e605e8e2c_4093	7ef7127a3f11d26e5ed74c78ba404004_1635 7ef7127a3f11d26e5ed74c78ba404004_3762	Pseudomonase_1_00014
rpsJ		30S ribosomal protein S10	3	4	1.34	1	2073				311	311	311	1c58dc8b1c0b0cb7c89dc05980566ffe_7494		7ef7127a3f11d26e5ed74c78ba404004_812	Pseudomonase_1_09658 Pseudomonase_1_10040
WP_021538680.1		GTPase family protein	3	4	1.34	1	4493				872	872	872		dcf007684d8598380507220e605e8e2c_4049	7ef7127a3f11d26e5ed74c78ba404004_6175 7ef7127a3f11d26e5ed74c78ba404004_7539	Pseudomonase_1_09157
agaR		aga operon transcriptional regulator AgaR	3	4	1.34	1	5139				809	824	812		dcf007684d8598380507220e605e8e2c_6474	7ef7127a3f11d26e5ed74c78ba404004_6326 7ef7127a3f11d26e5ed74c78ba404004_1199	Pseudomonase_1_03776
fusA		elongation factor G	3	4	1.34	1	2253				2114	2114	2114	1c58dc8b1c0b0cb7c89dc05980566ffe_7484		7ef7127a3f11d26e5ed74c78ba404004_774	Pseudomonase_1_05841 Pseudomonase_1_06155
papF		P fimbrial tip protein PapF	3	4	1.34	1	8032				503	503	503		dcf007684d8598380507220e605e8e2c_9029	7ef7127a3f11d26e5ed74c78ba404004_1751 7ef7127a3f11d26e5ed74c78ba404004_8821	Pseudomonase_1_00724
atpA		ATP synthase subunit alpha	3	4	1.34	1	7052				1541	1541	1541	1c58dc8b1c0b0cb7c89dc05980566ffe_6643		7ef7127a3f11d26e5ed74c78ba404004_10055	Pseudomonase_1_04922 Pseudomonase_1_05414
rpsD		30S ribosomal protein S4	3	4	1.34	1	2046				620	620	620	1c58dc8b1c0b0cb7c89dc05980566ffe_7544		7ef7127a3f11d26e5ed74c78ba404004_862	Pseudomonase_1_09683 Pseudomonase_1_09833
rpsG		30S ribosomal protein S7	3	4	1.34	1	1712				470	470	470	1c58dc8b1c0b0cb7c89dc05980566ffe_7482		7ef7127a3f11d26e5ed74c78ba404004_772	Pseudomonase_1_05840 Pseudomonase_1_06156
atpD		F0F1 ATP synthase subunit beta	3	4	1.34	1	7054				1382	1382	1382	1c58dc8b1c0b0cb7c89dc05980566ffe_6647		7ef7127a3f11d26e5ed74c78ba404004_10059	Pseudomonase_1_04924 Pseudomonase_1_05416
psiE		Protein PsiE	3	6	2	1	8635				227	1544	525		dcf007684d8598380507220e605e8e2c_8385	7ef7127a3f11d26e5ed74c78ba404004_9369	Pseudomonase_1_08408 Pseudomonase_1_08411 Pseudomonase_1_09871 Pseudomonase_1_09642
sfaX		HTH-type transcriptional regulator SfaX	3	6	2	1	8051				500	551	534		dcf007684d8598380507220e605e8e2c_9025	7ef7127a3f11d26e5ed74c78ba404004_1755 7ef7127a3f11d26e5ed74c78ba404004_8825 7ef7127a3f11d26e5ed74c78ba404004_7598	Pseudomonase_1_00722 Pseudomonase_1_08456
WP_152768572.1		adhesin	3	5	1.67	1	4811				1082	2297	1364		dcf007684d8598380507220e605e8e2c_640 dcf007684d8598380507220e605e8e2c_642	7ef7127a3f11d26e5ed74c78ba404004_7440 7ef7127a3f11d26e5ed74c78ba404004_7438	Pseudomonase_1_09112
yaiP		glycosyltransferase family 2 protein	3	6	2	1	4246				110	1196	968		dcf007684d8598380507220e605e8e2c_722 dcf007684d8598380507220e605e8e2c_4009	7ef7127a3f11d26e5ed74c78ba404004_7352 7ef7127a3f11d26e5ed74c78ba404004_3832	Pseudomonase_1_08489 Pseudomonase_1_06961
gspL		type II secretion system protein GspL	3	4	1.34	1	5202				257	1178	876		dcf007684d8598380507220e605e8e2c_6083 dcf007684d8598380507220e605e8e2c_6085	7ef7127a3f11d26e5ed74c78ba404004_1588	Pseudomonase_1_03586
tadA		Putative type II secretion system protein E	3	5	1.67	1	1716				521	1481	899		dcf007684d8598380507220e605e8e2c_6838 dcf007684d8598380507220e605e8e2c_6836	7ef7127a3f11d26e5ed74c78ba404004_802	Pseudomonase_1_10077 Pseudomonase_1_10035
cdiA		tRNA nuclease CdiA	3	5	1.67	1	8081				1376	9866	8100		dcf007684d8598380507220e605e8e2c_9119	7ef7127a3f11d26e5ed74c78ba404004_8721 7ef7127a3f11d26e5ed74c78ba404004_1687	Pseudomonase_1_00772 Pseudomonase_1_09472
WP_001295754.1		hypothetical protein	3	3	1	1	4002	38	15		140	140	140	1c58dc8b1c0b0cb7c89dc05980566ffe_5138	dcf007684d8598380507220e605e8e2c_9436	7ef7127a3f11d26e5ed74c78ba404004_8298
ilvL		ilv operon leader peptide	3	3	1	1	7017	53	12		98	98	98	1c58dc8b1c0b0cb7c89dc05980566ffe_6373	dcf007684d8598380507220e605e8e2c_7802	7ef7127a3f11d26e5ed74c78ba404004_9984
rpmH		50S ribosomal protein L34	3	3	1	1	7077	215	4		140	140	140	1c58dc8b1c0b0cb7c89dc05980566ffe_6693	dcf007684d8598380507220e605e8e2c_7687	7ef7127a3f11d26e5ed74c78ba404004_10117
agn43		autotransporter adhesin family protein	3	8	2.67	1	6042				287	3122	1718		dcf007684d8598380507220e605e8e2c_4051 dcf007684d8598380507220e605e8e2c_4053 dcf007684d8598380507220e605e8e2c_4055 dcf007684d8598380507220e605e8e2c_9199	7ef7127a3f11d26e5ed74c78ba404004_7537 7ef7127a3f11d26e5ed74c78ba404004_1643	Pseudomonase_1_09156 Pseudomonase_1_03557
yidD		membrane protein insertion efficiency factor YidD	3	3	1	1	6919	28	35		257	257	257	1c58dc8b1c0b0cb7c89dc05980566ffe_6689	dcf007684d8598380507220e605e8e2c_7691	7ef7127a3f11d26e5ed74c78ba404004_10113
rplV		50S ribosomal protein L22	3	4	1.34	1	2067				332	332	332	1c58dc8b1c0b0cb7c89dc05980566ffe_7506		7ef7127a3f11d26e5ed74c78ba404004_824	Pseudomonase_1_09664 Pseudomonase_1_10046
rpsQ		30S ribosomal protein S17	3	4	1.34	1	2063				254	254	254	1c58dc8b1c0b0cb7c89dc05980566ffe_7514		7ef7127a3f11d26e5ed74c78ba404004_832	Pseudomonase_1_09668 Pseudomonase_1_10050
WP_009310009.1		M48 family metallopeptidase	3	3	1	1	6086	14	38		755	755	755	1c58dc8b1c0b0cb7c89dc05980566ffe_10704	dcf007684d8598380507220e605e8e2c_9203		Pseudomonase_1_00974
WP_000443938.1		DUF262 domain-containing protein	3	3	1	1	7951	1	195		1451	1451	1451	1c58dc8b1c0b0cb7c89dc05980566ffe_10712	dcf007684d8598380507220e605e8e2c_9211		Pseudomonase_1_09632
WP_003026799.1		DUF1778 domain-containing protein	3	3	1	1	7887	1	436		266	266	266	1c58dc8b1c0b0cb7c89dc05980566ffe_10790	dcf007684d8598380507220e605e8e2c_7196		Pseudomonase_1_09768
arsB		arsenite efflux transporter membrane subunit ArsB	3	3	1	1	7881	1	422		1289	1289	1289	1c58dc8b1c0b0cb7c89dc05980566ffe_10816	dcf007684d8598380507220e605e8e2c_7218		Pseudomonase_1_09627
group_536	prfB	peptide chain release factor 2	3	3	1	1	3735	5	52		74	74	74	1c58dc8b1c0b0cb7c89dc05980566ffe_8480	dcf007684d8598380507220e605e8e2c_5864	7ef7127a3f11d26e5ed74c78ba404004_1931
thrA		bifunctional aspartate kinase/homoserine dehydrogenase I	3	3	1	1	4005	38	29		2462	2462	2462		dcf007684d8598380507220e605e8e2c_6	7ef7127a3f11d26e5ed74c78ba404004_8291	Pseudomonase_1_05357
thrB		homoserine kinase	3	3	1	1	4006	38	28		932	932	932		dcf007684d8598380507220e605e8e2c_8	7ef7127a3f11d26e5ed74c78ba404004_8289	Pseudomonase_1_05356
thrC		threonine synthase	3	3	1	1	4007	38	27		1286	1286	1286		dcf007684d8598380507220e605e8e2c_10	7ef7127a3f11d26e5ed74c78ba404004_8287	Pseudomonase_1_05355
yaaA		peroxide stress protein YaaA	3	3	1	1	4009	38	25		776	776	776		dcf007684d8598380507220e605e8e2c_14	7ef7127a3f11d26e5ed74c78ba404004_8283	Pseudomonase_1_05353
yaaJ		sodium:alanine symporter family protein	3	3	1	1	4010	38	24		1430	1430	1430		dcf007684d8598380507220e605e8e2c_16	7ef7127a3f11d26e5ed74c78ba404004_8281	Pseudomonase_1_05352
tal		transaldolase	3	3	1	1	4011	38	23		953	953	953		dcf007684d8598380507220e605e8e2c_18	7ef7127a3f11d26e5ed74c78ba404004_8279	Pseudomonase_1_05351
mog		molybdopterin adenylyltransferase	3	3	1	1	4012	38	22		587	587	587		dcf007684d8598380507220e605e8e2c_20	7ef7127a3f11d26e5ed74c78ba404004_8277	Pseudomonase_1_05350
satP		acetate uptake transporter	3	3	1	1	4013	38	21		566	566	566		dcf007684d8598380507220e605e8e2c_22	7ef7127a3f11d26e5ed74c78ba404004_8275	Pseudomonase_1_05349
msyB		acidic protein MsyB	3	3	1	1	4014	38	20		713	713	713		dcf007684d8598380507220e605e8e2c_24	7ef7127a3f11d26e5ed74c78ba404004_8273	Pseudomonase_1_05348
yaaI		DUF2541 family protein	3	3	1	1	4015	38	19		404	404	404		dcf007684d8598380507220e605e8e2c_26	7ef7127a3f11d26e5ed74c78ba404004_8271	Pseudomonase_1_05347
mokC		type I toxin-antitoxin system toxin MokC	3	3	1	1	4130	440	1		152	152	152		dcf007684d8598380507220e605e8e2c_32	7ef7127a3f11d26e5ed74c78ba404004_8265	Pseudomonase_1_05343
WP_001274828.1		hypothetical protein	3	3	1	1	4129	440	2		761	761	761		dcf007684d8598380507220e605e8e2c_34	7ef7127a3f11d26e5ed74c78ba404004_8263	Pseudomonase_1_05342
WP_001314416.1		sulfatase-like hydrolase/transferase	3	3	1	1	4128	440	3		1493	1493	1493		dcf007684d8598380507220e605e8e2c_36	7ef7127a3f11d26e5ed74c78ba404004_8261	Pseudomonase_1_05341
WP_000494927.1		hypothetical protein	3	3	1	1	4127	440	4		1259	1259	1259		dcf007684d8598380507220e605e8e2c_38	7ef7127a3f11d26e5ed74c78ba404004_8259	Pseudomonase_1_05340
nhaA		Na+/H+ antiporter NhaA	3	3	1	1	4126	440	5		1166	1166	1166		dcf007684d8598380507220e605e8e2c_40	7ef7127a3f11d26e5ed74c78ba404004_8257	Pseudomonase_1_05339
nhaR		transcriptional activator NhaR	3	3	1	1	4125	440	6		899	905	903		dcf007684d8598380507220e605e8e2c_42	7ef7127a3f11d26e5ed74c78ba404004_8255	Pseudomonase_1_05338
ribF		bifunctional riboflavin kinase/FAD synthetase	3	3	1	1	4108	418	6		941	941	941		dcf007684d8598380507220e605e8e2c_48	7ef7127a3f11d26e5ed74c78ba404004_8249	Pseudomonase_1_05336
ileS		isoleucine--tRNA ligase	3	3	1	1	4107	418	7		2816	2816	2816		dcf007684d8598380507220e605e8e2c_50	7ef7127a3f11d26e5ed74c78ba404004_8247	Pseudomonase_1_05335
lspA		signal peptidase II	3	3	1	1	4106	418	8		494	494	494		dcf007684d8598380507220e605e8e2c_52	7ef7127a3f11d26e5ed74c78ba404004_8245	Pseudomonase_1_05334
fkpB		FKBP-type peptidyl-prolyl cis-trans isomerase	3	3	1	1	4105	418	9		449	449	449		dcf007684d8598380507220e605e8e2c_54	7ef7127a3f11d26e5ed74c78ba404004_8243	Pseudomonase_1_05333
ispH		4-hydroxy-3-methylbut-2-enyl diphosphate reductase	3	3	1	1	4104	418	4		950	950	950		dcf007684d8598380507220e605e8e2c_56	7ef7127a3f11d26e5ed74c78ba404004_8241	Pseudomonase_1_05332
rihC		ribonucleoside hydrolase RihC	3	3	1	1	4103	418	3		914	914	914		dcf007684d8598380507220e605e8e2c_58	7ef7127a3f11d26e5ed74c78ba404004_8239	Pseudomonase_1_05331
dapB		4-hydroxy-tetrahydrodipicolinate reductase	3	3	1	1	4102	418	2		821	821	821		dcf007684d8598380507220e605e8e2c_60	7ef7127a3f11d26e5ed74c78ba404004_8237	Pseudomonase_1_05330
carA		glutamine-hydrolyzing carbamoyl-phosphate synthase small subunit	3	3	1	1	4101	418	1		1148	1148	1148		dcf007684d8598380507220e605e8e2c_62	7ef7127a3f11d26e5ed74c78ba404004_8235	Pseudomonase_1_05329
caiF		carnitine metabolism transcriptional regulator CaiF	3	3	1	1	4078	321	17		395	395	395		dcf007684d8598380507220e605e8e2c_66	7ef7127a3f11d26e5ed74c78ba404004_8231	Pseudomonase_1_05327
caiE		carnitine operon protein CaiE	3	3	1	1	4077	321	18		590	590	590		dcf007684d8598380507220e605e8e2c_68	7ef7127a3f11d26e5ed74c78ba404004_8229	Pseudomonase_1_05326
caiD		crotonobetainyl-CoA hydratase	3	3	1	1	4076	321	19		785	785	785		dcf007684d8598380507220e605e8e2c_70	7ef7127a3f11d26e5ed74c78ba404004_8227	Pseudomonase_1_05325
caiC		crotonobetaine/carnitine-CoA ligase	3	3	1	1	4075	321	20		1553	1553	1553		dcf007684d8598380507220e605e8e2c_72	7ef7127a3f11d26e5ed74c78ba404004_8225	Pseudomonase_1_05324
caiB		L-carnitine CoA-transferase	3	3	1	1	4074	321	21		1217	1217	1217		dcf007684d8598380507220e605e8e2c_74	7ef7127a3f11d26e5ed74c78ba404004_8223	Pseudomonase_1_05323
caiA		crotonobetainyl-CoA dehydrogenase	3	3	1	1	4073	321	22		1142	1142	1142		dcf007684d8598380507220e605e8e2c_76	7ef7127a3f11d26e5ed74c78ba404004_8221	Pseudomonase_1_05322
caiT		L-carnitine/gamma-butyrobetaine antiporter	3	3	1	1	4072	321	23		1514	1514	1514		dcf007684d8598380507220e605e8e2c_78	7ef7127a3f11d26e5ed74c78ba404004_8219	Pseudomonase_1_05321
fixA		electron transfer flavoprotein FixA	3	3	1	1	4071	321	24		770	770	770		dcf007684d8598380507220e605e8e2c_80	7ef7127a3f11d26e5ed74c78ba404004_8217	Pseudomonase_1_05320
fixB		electron transfer flavoprotein subunit alpha/FixB family protein	3	3	1	1	4070	321	25		941	941	941		dcf007684d8598380507220e605e8e2c_82	7ef7127a3f11d26e5ed74c78ba404004_8215	Pseudomonase_1_05319
fixC		FAD-dependent oxidoreductase	3	3	1	1	4069	321	26		1286	1286	1286		dcf007684d8598380507220e605e8e2c_84	7ef7127a3f11d26e5ed74c78ba404004_8213	Pseudomonase_1_05318
fixX		ferredoxin-like protein FixX	3	3	1	1	4068	321	27		287	287	287		dcf007684d8598380507220e605e8e2c_86	7ef7127a3f11d26e5ed74c78ba404004_8211	Pseudomonase_1_05317
yaaU		MFS transporter	3	3	1	1	4067	321	28		1331	1331	1331		dcf007684d8598380507220e605e8e2c_88	7ef7127a3f11d26e5ed74c78ba404004_8209	Pseudomonase_1_05316
kefF		glutathione-regulated potassium-efflux system oxidoreductase KefF	3	3	1	1	4066	321	29		530	530	530		dcf007684d8598380507220e605e8e2c_90	7ef7127a3f11d26e5ed74c78ba404004_8207	Pseudomonase_1_05315
kefC		glutathione-regulated potassium-efflux system protein KefC	3	3	1	1	4065	321	30		1862	1862	1862		dcf007684d8598380507220e605e8e2c_92	7ef7127a3f11d26e5ed74c78ba404004_8205	Pseudomonase_1_05314
WP_000125568.1		type II toxin-antitoxin system CcdA family antitoxin	3	3	1	1	4063	321	32		233	233	233		dcf007684d8598380507220e605e8e2c_96	7ef7127a3f11d26e5ed74c78ba404004_8201	Pseudomonase_1_05312
WP_001160966.1		CcdB family protein	3	3	1	1	4062	321	33		314	314	314		dcf007684d8598380507220e605e8e2c_98	7ef7127a3f11d26e5ed74c78ba404004_8199	Pseudomonase_1_05311
apaH		bis(5'-nucleosyl)-tetraphosphatase (symmetrical) ApaH	3	3	1	1	4061	321	34		848	848	848		dcf007684d8598380507220e605e8e2c_100	7ef7127a3f11d26e5ed74c78ba404004_8197	Pseudomonase_1_05310
apaG		Co2+/Mg2+ efflux protein ApaG	3	3	1	1	4060	321	35		377	377	377		dcf007684d8598380507220e605e8e2c_102	7ef7127a3f11d26e5ed74c78ba404004_8195	Pseudomonase_1_05309
rsmA		16S rRNA (adenine(1518)-N(6)/adenine(1519)-N(6))-dimethyltransferase RsmA	3	3	1	1	4059	321	36		821	821	821		dcf007684d8598380507220e605e8e2c_104	7ef7127a3f11d26e5ed74c78ba404004_8193	Pseudomonase_1_05308
pdxA		4-hydroxythreonine-4-phosphate dehydrogenase PdxA	3	3	1	1	4058	321	37		989	989	989		dcf007684d8598380507220e605e8e2c_106	7ef7127a3f11d26e5ed74c78ba404004_8191	Pseudomonase_1_05307
surA		peptidylprolyl isomerase SurA	3	3	1	1	4057	321	38		1286	1286	1286		dcf007684d8598380507220e605e8e2c_108	7ef7127a3f11d26e5ed74c78ba404004_8189	Pseudomonase_1_05306
lptD		LPS assembly protein LptD	3	3	1	1	4056	321	39		2354	2354	2354		dcf007684d8598380507220e605e8e2c_110	7ef7127a3f11d26e5ed74c78ba404004_8187	Pseudomonase_1_05305
rluA		bifunctional tRNA pseudouridine(32) synthase/23S rRNA pseudouridine(746) synthase RluA	3	3	1	1	4054	321	16		659	659	659		dcf007684d8598380507220e605e8e2c_114	7ef7127a3f11d26e5ed74c78ba404004_8183	Pseudomonase_1_05303
rapA		RNA polymerase-associated protein RapA	3	3	1	1	4053	321	15		2906	2906	2906		dcf007684d8598380507220e605e8e2c_116	7ef7127a3f11d26e5ed74c78ba404004_8181	Pseudomonase_1_05302
polB		DNA polymerase II	3	3	1	1	4052	321	14		2351	2351	2351		dcf007684d8598380507220e605e8e2c_118	7ef7127a3f11d26e5ed74c78ba404004_8179	Pseudomonase_1_05301
group_5696	araD	L-ribulose-5-phosphate 4-epimerase	3	3	1	1	4051	321	13		695	695	695		dcf007684d8598380507220e605e8e2c_120	7ef7127a3f11d26e5ed74c78ba404004_8177	Pseudomonase_1_05300
araA		L-arabinose isomerase	3	3	1	1	4050	321	12		1502	1502	1502		dcf007684d8598380507220e605e8e2c_122	7ef7127a3f11d26e5ed74c78ba404004_8175	Pseudomonase_1_05299
araB		ribulokinase	3	3	1	1	4049	321	11		1700	1700	1700		dcf007684d8598380507220e605e8e2c_124	7ef7127a3f11d26e5ed74c78ba404004_8173	Pseudomonase_1_05298
araC		arabinose operon transcriptional regulator AraC	3	3	1	1	4048	321	10		845	845	845		dcf007684d8598380507220e605e8e2c_126	7ef7127a3f11d26e5ed74c78ba404004_8171	Pseudomonase_1_05297
group_57		integrase core domain-containing protein	3	4	1.34	1	7950				206	308	270	1c58dc8b1c0b0cb7c89dc05980566ffe_10710	dcf007684d8598380507220e605e8e2c_9209		Pseudomonase_1_09633 Pseudomonase_1_09945
WP_000049681.1		hypothetical protein	3	3	1	1	4046	321	8		422	422	422		dcf007684d8598380507220e605e8e2c_132	7ef7127a3f11d26e5ed74c78ba404004_8165	Pseudomonase_1_05295
yabI		DedA family protein	3	3	1	1	4045	321	7		764	764	764		dcf007684d8598380507220e605e8e2c_134	7ef7127a3f11d26e5ed74c78ba404004_8163	Pseudomonase_1_05294
thiQ		thiamine ABC transporter ATP-binding protein ThiQ	3	3	1	1	4044	321	6		698	698	698		dcf007684d8598380507220e605e8e2c_136	7ef7127a3f11d26e5ed74c78ba404004_8161	Pseudomonase_1_05293
thiP		thiamine/thiamine pyrophosphate ABC transporter permease ThiP	3	3	1	1	4043	321	5		1610	1610	1610		dcf007684d8598380507220e605e8e2c_138	7ef7127a3f11d26e5ed74c78ba404004_8159	Pseudomonase_1_05292
thiB		thiamine ABC transporter substrate binding subunit	3	3	1	1	4042	321	4		983	983	983		dcf007684d8598380507220e605e8e2c_140	7ef7127a3f11d26e5ed74c78ba404004_8157	Pseudomonase_1_05291
sgrR		DNA-binding transcriptional regulator SgrR	3	3	1	1	4041	321	3		1655	1655	1655		dcf007684d8598380507220e605e8e2c_143	7ef7127a3f11d26e5ed74c78ba404004_8154	Pseudomonase_1_05290
WP_001248768.1		glucose uptake inhibitor SgrT	3	3	1	1	10516	321	2		131	131	131		dcf007684d8598380507220e605e8e2c_145	7ef7127a3f11d26e5ed74c78ba404004_8152	Pseudomonase_1_05289
leuD		3-isopropylmalate dehydratase small subunit	3	3	1	1	10517	321	1		605	605	605		dcf007684d8598380507220e605e8e2c_147	7ef7127a3f11d26e5ed74c78ba404004_8150	Pseudomonase_1_05288
leuB		3-isopropylmalate dehydrogenase	3	3	1	1	10522	450	2		1091	1091	1091		dcf007684d8598380507220e605e8e2c_151	7ef7127a3f11d26e5ed74c78ba404004_8146	Pseudomonase_1_05286
leuA		2-isopropylmalate synthase	3	3	1	1	10521	450	3		1571	1571	1571		dcf007684d8598380507220e605e8e2c_153	7ef7127a3f11d26e5ed74c78ba404004_8144	Pseudomonase_1_05285
leuO		transcriptional regulator LeuO	3	3	1	1	10520	450	6		944	944	944		dcf007684d8598380507220e605e8e2c_157	7ef7127a3f11d26e5ed74c78ba404004_8140	Pseudomonase_1_05284
ilvI		acetolactate synthase 3 large subunit	3	3	1	1	10514	450	5		1724	1724	1724		dcf007684d8598380507220e605e8e2c_161	7ef7127a3f11d26e5ed74c78ba404004_8136	Pseudomonase_1_05283
mraZ		division/cell wall cluster transcriptional repressor MraZ	3	3	1	1	10546	519	2		458	458	458		dcf007684d8598380507220e605e8e2c_169	7ef7127a3f11d26e5ed74c78ba404004_8128	Pseudomonase_1_05280
rsmH		16S rRNA (cytosine(1402)-N(4))-methyltransferase RsmH	3	3	1	1	10547	519	1		941	941	941		dcf007684d8598380507220e605e8e2c_171	7ef7127a3f11d26e5ed74c78ba404004_8126	Pseudomonase_1_05279
ftsI		peptidoglycan glycosyltransferase FtsI	3	3	1	1	10550	493	1		1766	1766	1766		dcf007684d8598380507220e605e8e2c_175	7ef7127a3f11d26e5ed74c78ba404004_8122	Pseudomonase_1_05277
murE		UDP-N-acetylmuramoyl-L-alanyl-D-glutamate--2,6-diaminopimelate ligase	3	3	1	1	10551	493	2		1487	1487	1487		dcf007684d8598380507220e605e8e2c_177	7ef7127a3f11d26e5ed74c78ba404004_8120	Pseudomonase_1_05276
murF		UDP-N-acetylmuramoyl-tripeptide--D-alanyl-D-alanine ligase	3	3	1	1	10552	493	3		1358	1358	1358		dcf007684d8598380507220e605e8e2c_179	7ef7127a3f11d26e5ed74c78ba404004_8118	Pseudomonase_1_05275
murD		UDP-N-acetylmuramoyl-L-alanine--D-glutamate ligase	3	3	1	1	10554	441	6		1316	1316	1316		dcf007684d8598380507220e605e8e2c_183	7ef7127a3f11d26e5ed74c78ba404004_8114	Pseudomonase_1_05273
ftsW		cell division protein FtsW	3	3	1	1	10555	441	5		1244	1244	1244		dcf007684d8598380507220e605e8e2c_185	7ef7127a3f11d26e5ed74c78ba404004_8112	Pseudomonase_1_05272
murG		undecaprenyldiphospho-muramoylpentapeptide beta-N-acetylglucosaminyltransferase	3	3	1	1	10556	441	4		1067	1067	1067		dcf007684d8598380507220e605e8e2c_187	7ef7127a3f11d26e5ed74c78ba404004_8110	Pseudomonase_1_05271
murC		UDP-N-acetylmuramate--L-alanine ligase	3	3	1	1	10557	441	3		1475	1475	1475		dcf007684d8598380507220e605e8e2c_189	7ef7127a3f11d26e5ed74c78ba404004_8108	Pseudomonase_1_05270
ddlB		D-alanine--D-alanine ligase	3	3	1	1	10558	441	2		920	920	920		dcf007684d8598380507220e605e8e2c_191	7ef7127a3f11d26e5ed74c78ba404004_8106	Pseudomonase_1_05269
ftsQ		cell division protein FtsQ	3	3	1	1	10559	441	1		830	830	830		dcf007684d8598380507220e605e8e2c_193	7ef7127a3f11d26e5ed74c78ba404004_8104	Pseudomonase_1_05268
mutT		8-oxo-dGTP diphosphatase MutT	3	3	1	1	10664	356	1		398	398	398		dcf007684d8598380507220e605e8e2c_205	7ef7127a3f11d26e5ed74c78ba404004_8092	Pseudomonase_1_05262
yacG		DNA gyrase inhibitor YacG	3	3	1	1	10663	356	2		197	197	197		dcf007684d8598380507220e605e8e2c_207	7ef7127a3f11d26e5ed74c78ba404004_8090	Pseudomonase_1_05261
zapD		cell division protein ZapD	3	3	1	1	10662	356	3		743	743	743		dcf007684d8598380507220e605e8e2c_209	7ef7127a3f11d26e5ed74c78ba404004_8088	Pseudomonase_1_05260
coaE		dephospho-CoA kinase	3	3	1	1	10661	356	4		620	620	620		dcf007684d8598380507220e605e8e2c_211	7ef7127a3f11d26e5ed74c78ba404004_8086	Pseudomonase_1_05259
guaC		GMP reductase	3	3	1	1	10659	356	6		1043	1043	1043		dcf007684d8598380507220e605e8e2c_215	7ef7127a3f11d26e5ed74c78ba404004_8082	Pseudomonase_1_05258
hofC		protein transport protein HofC	3	3	1	1	10658	356	7		1202	1202	1202		dcf007684d8598380507220e605e8e2c_217	7ef7127a3f11d26e5ed74c78ba404004_8080	Pseudomonase_1_05257
gspE		type II secretion system protein GspE	3	3	1	1	10657	356	22		1385	1385	1385		dcf007684d8598380507220e605e8e2c_219	7ef7127a3f11d26e5ed74c78ba404004_8078	Pseudomonase_1_05256
ppdD		prepilin peptidase-dependent pilin	3	3	1	1	10656	356	21		440	440	440		dcf007684d8598380507220e605e8e2c_221	7ef7127a3f11d26e5ed74c78ba404004_8076	Pseudomonase_1_05255
nadC		carboxylating nicotinate-nucleotide diphosphorylase	3	3	1	1	10655	356	20		893	893	893		dcf007684d8598380507220e605e8e2c_223	7ef7127a3f11d26e5ed74c78ba404004_8074	Pseudomonase_1_05254
ampD		1,6-anhydro-N-acetylmuramyl-L-alanine amidase AmpD	3	3	1	1	10654	356	19		551	551	551		dcf007684d8598380507220e605e8e2c_225	7ef7127a3f11d26e5ed74c78ba404004_8072	Pseudomonase_1_05253
ampE		beta-lactamase regulator AmpE	3	3	1	1	10653	356	18		854	854	854		dcf007684d8598380507220e605e8e2c_227	7ef7127a3f11d26e5ed74c78ba404004_8070	Pseudomonase_1_05252
aroP		aromatic amino acid transporter AroP	3	3	1	1	10652	356	17		1370	1370	1370		dcf007684d8598380507220e605e8e2c_229	7ef7127a3f11d26e5ed74c78ba404004_8068	Pseudomonase_1_05251
group_5737	hcp	type VI secretion system tube protein Hcp	3	3	1	1	10651	356	16		1781	1781	1781		dcf007684d8598380507220e605e8e2c_231	7ef7127a3f11d26e5ed74c78ba404004_8066	Pseudomonase_1_05250
WP_000471925.1		bacteriocin immunity protein	3	3	1	1	10650	356	15		284	284	284		dcf007684d8598380507220e605e8e2c_233	7ef7127a3f11d26e5ed74c78ba404004_8064	Pseudomonase_1_05249
WP_000282227.1		bacteriocin immunity protein	3	3	1	1	10648	356	14		290	290	290		dcf007684d8598380507220e605e8e2c_237	7ef7127a3f11d26e5ed74c78ba404004_8060	Pseudomonase_1_05248
WP_000543774.1		bacteriocin immunity protein	3	3	1	1	10647	356	11		290	290	290		dcf007684d8598380507220e605e8e2c_241	7ef7127a3f11d26e5ed74c78ba404004_8056	Pseudomonase_1_05247
pdhR		pyruvate dehydrogenase complex transcriptional repressor PdhR	3	3	1	1	10646	356	10		764	764	764		dcf007684d8598380507220e605e8e2c_243	7ef7127a3f11d26e5ed74c78ba404004_8054	Pseudomonase_1_05246
aceE		pyruvate dehydrogenase (acetyl-transferring), homodimeric type	3	3	1	1	10645	356	9		2663	2663	2663		dcf007684d8598380507220e605e8e2c_245	7ef7127a3f11d26e5ed74c78ba404004_8052	Pseudomonase_1_05245
aceF		pyruvate dehydrogenase complex dihydrolipoyllysine-residue acetyltransferase	3	3	1	1	10644	356	8		1892	1892	1892		dcf007684d8598380507220e605e8e2c_247	7ef7127a3f11d26e5ed74c78ba404004_8050	Pseudomonase_1_05244
yacH		DUF3300 domain-containing protein	3	3	1	1	10629	566	1		1757	1757	1757		dcf007684d8598380507220e605e8e2c_251	7ef7127a3f11d26e5ed74c78ba404004_8046	Pseudomonase_1_05242
yacL		protein YacL	3	3	1	1	10627	432	1		362	362	362		dcf007684d8598380507220e605e8e2c_255	7ef7127a3f11d26e5ed74c78ba404004_8042	Pseudomonase_1_05240
speD		adenosylmethionine decarboxylase	3	3	1	1	10626	432	2		794	794	794		dcf007684d8598380507220e605e8e2c_257	7ef7127a3f11d26e5ed74c78ba404004_8040	Pseudomonase_1_05239
speE		polyamine aminopropyltransferase	3	3	1	1	10625	432	3		866	866	866		dcf007684d8598380507220e605e8e2c_259	7ef7127a3f11d26e5ed74c78ba404004_8038	Pseudomonase_1_05238
yacC		YacC family pilotin-like protein	3	3	1	1	10624	432	4		347	347	347		dcf007684d8598380507220e605e8e2c_261	7ef7127a3f11d26e5ed74c78ba404004_8036	Pseudomonase_1_05237
cueO		multicopper oxidase CueO	3	3	1	1	10623	432	5		1550	1550	1550		dcf007684d8598380507220e605e8e2c_263	7ef7127a3f11d26e5ed74c78ba404004_8034	Pseudomonase_1_05236
gcd		quinoprotein glucose dehydrogenase	3	3	1	1	10622	432	7		2390	2390	2390		dcf007684d8598380507220e605e8e2c_265	7ef7127a3f11d26e5ed74c78ba404004_8032	Pseudomonase_1_05235
hpt		hypoxanthine phosphoribosyltransferase	3	3	1	1	10572	432	6		536	536	536		dcf007684d8598380507220e605e8e2c_267	7ef7127a3f11d26e5ed74c78ba404004_8030	Pseudomonase_1_05234
yadG		ABC transporter ATP-binding protein	3	3	1	1	10598	361	14		926	926	926		dcf007684d8598380507220e605e8e2c_271	7ef7127a3f11d26e5ed74c78ba404004_8026	Pseudomonase_1_05232
yadH		ABC transporter permease	3	3	1	1	10597	361	15		770	770	770		dcf007684d8598380507220e605e8e2c_273	7ef7127a3f11d26e5ed74c78ba404004_8024	Pseudomonase_1_05231
yadI		PTS sugar transporter subunit IIA	3	3	1	1	10596	361	16		440	440	440		dcf007684d8598380507220e605e8e2c_275	7ef7127a3f11d26e5ed74c78ba404004_8022	Pseudomonase_1_05230
yadE		polysaccharide deacetylase family protein	3	3	1	1	10595	361	17		1229	1229	1229		dcf007684d8598380507220e605e8e2c_277	7ef7127a3f11d26e5ed74c78ba404004_8020	Pseudomonase_1_05229
panD		aspartate 1-decarboxylase	3	3	1	1	10594	361	18		380	380	380		dcf007684d8598380507220e605e8e2c_279	7ef7127a3f11d26e5ed74c78ba404004_8018	Pseudomonase_1_05228
WP_000339891.1		Rpn family recombination-promoting nuclease/putative transposase	3	3	1	1	10593	361	19		932	932	932		dcf007684d8598380507220e605e8e2c_281	7ef7127a3f11d26e5ed74c78ba404004_8016	Pseudomonase_1_05227
WP_000404125.1		hypothetical protein	3	3	1	1	10592	361	13		203	203	203		dcf007684d8598380507220e605e8e2c_283	7ef7127a3f11d26e5ed74c78ba404004_8014	Pseudomonase_1_05226
panC		pantoate--beta-alanine ligase	3	3	1	1	10591	361	12		851	851	851		dcf007684d8598380507220e605e8e2c_285	7ef7127a3f11d26e5ed74c78ba404004_8012	Pseudomonase_1_05225
panB		3-methyl-2-oxobutanoate hydroxymethyltransferase	3	3	1	1	10590	361	11		794	794	794		dcf007684d8598380507220e605e8e2c_287	7ef7127a3f11d26e5ed74c78ba404004_8010	Pseudomonase_1_05224
WP_000846619.1		fimbrial-like adhesin	3	3	1	1	10589	361	10		1262	1262	1262		dcf007684d8598380507220e605e8e2c_289	7ef7127a3f11d26e5ed74c78ba404004_8008	Pseudomonase_1_05223
WP_001247914.1		fimbrial-like protein	3	3	1	1	10588	361	9		596	596	596		dcf007684d8598380507220e605e8e2c_291	7ef7127a3f11d26e5ed74c78ba404004_8006	Pseudomonase_1_05222
yadL		fimbrial-like protein YadL	3	3	1	1	10587	361	8		608	608	608		dcf007684d8598380507220e605e8e2c_293	7ef7127a3f11d26e5ed74c78ba404004_8004	Pseudomonase_1_05221
WP_000591066.1		fimbrial protein	3	3	1	1	10586	361	7		566	566	566		dcf007684d8598380507220e605e8e2c_295	7ef7127a3f11d26e5ed74c78ba404004_8002	Pseudomonase_1_05220
htrE		outer membrane usher protein	3	3	1	1	10585	361	6		2588	2588	2588		dcf007684d8598380507220e605e8e2c_297	7ef7127a3f11d26e5ed74c78ba404004_8000	Pseudomonase_1_05219
WP_000465917.1		fimbrial chaperone	3	3	1	1	10584	361	5		740	740	740		dcf007684d8598380507220e605e8e2c_299	7ef7127a3f11d26e5ed74c78ba404004_7998	Pseudomonase_1_05218
WP_000038450.1		fimbrial protein	3	3	1	1	10583	361	4		590	590	590		dcf007684d8598380507220e605e8e2c_301	7ef7127a3f11d26e5ed74c78ba404004_7996	Pseudomonase_1_05217
folK		2-amino-4-hydroxy-6-hydroxymethyldihydropteridine diphosphokinase	3	3	1	1	10582	361	3		479	479	479		dcf007684d8598380507220e605e8e2c_303	7ef7127a3f11d26e5ed74c78ba404004_7994	Pseudomonase_1_05216
sfsA		DNA/RNA nuclease SfsA	3	3	1	1	10578	404	1		704	704	704		dcf007684d8598380507220e605e8e2c_311	7ef7127a3f11d26e5ed74c78ba404004_7986	Pseudomonase_1_05212
thpR		RNA 2',3'-cyclic phosphodiesterase	3	3	1	1	10577	404	2		530	530	530		dcf007684d8598380507220e605e8e2c_313	7ef7127a3f11d26e5ed74c78ba404004_7984	Pseudomonase_1_05211
hrpB		ATP-dependent helicase HrpB	3	3	1	1	10576	404	3		2429	2429	2429		dcf007684d8598380507220e605e8e2c_315	7ef7127a3f11d26e5ed74c78ba404004_7982	Pseudomonase_1_05210
mrcB		bifunctional glycosyl transferase/transpeptidase	3	3	1	1	10575	404	4		2534	2534	2534		dcf007684d8598380507220e605e8e2c_317	7ef7127a3f11d26e5ed74c78ba404004_7980	Pseudomonase_1_05209
fhuC		Fe3+-hydroxamate ABC transporter ATP-binding protein FhuC	3	3	1	1	10573	404	12		797	797	797		dcf007684d8598380507220e605e8e2c_321	7ef7127a3f11d26e5ed74c78ba404004_7976	Pseudomonase_1_05207
fhuD		Fe(3+)-hydroxamate ABC transporter substrate-binding protein FhuD	3	3	1	1	5368	404	11		890	890	890		dcf007684d8598380507220e605e8e2c_323	7ef7127a3f11d26e5ed74c78ba404004_7974	Pseudomonase_1_05206
fhuB		Fe(3+)-hydroxamate ABC transporter permease FhuB	3	3	1	1	5369	404	10		1982	1982	1982		dcf007684d8598380507220e605e8e2c_325	7ef7127a3f11d26e5ed74c78ba404004_7972	Pseudomonase_1_05205
hemL		glutamate-1-semialdehyde 2,1-aminomutase	3	3	1	1	5370	404	9		1280	1280	1280		dcf007684d8598380507220e605e8e2c_327	7ef7127a3f11d26e5ed74c78ba404004_7970	Pseudomonase_1_05204
clcA		H(+)/Cl(-) exchange transporter ClcA	3	3	1	1	5371	404	7		1421	1421	1421		dcf007684d8598380507220e605e8e2c_331	7ef7127a3f11d26e5ed74c78ba404004_7966	Pseudomonase_1_05203
yadS		TRIC cation channel family protein	3	3	1	1	5408	446	1		623	623	623		dcf007684d8598380507220e605e8e2c_337	7ef7127a3f11d26e5ed74c78ba404004_7960	Pseudomonase_1_05201
btuF		vitamin B12 ABC transporter substrate-binding protein BtuF	3	3	1	1	5409	446	2		800	800	800		dcf007684d8598380507220e605e8e2c_339	7ef7127a3f11d26e5ed74c78ba404004_7958	Pseudomonase_1_05200
mtnN		5'-methylthioadenosine/S-adenosylhomocysteine nucleosidase	3	3	1	1	5410	446	3		698	698	698		dcf007684d8598380507220e605e8e2c_341	7ef7127a3f11d26e5ed74c78ba404004_7956	Pseudomonase_1_05199
dgt		dGTPase	3	3	1	1	5411	446	6		1517	1517	1517		dcf007684d8598380507220e605e8e2c_343	7ef7127a3f11d26e5ed74c78ba404004_7954	Pseudomonase_1_05198
degP		serine endoprotease DegP	3	3	1	1	5412	446	5		1424	1424	1424		dcf007684d8598380507220e605e8e2c_345	7ef7127a3f11d26e5ed74c78ba404004_7952	Pseudomonase_1_05197
cdaR		DNA-binding transcriptional regulator CdaR	3	3	1	1	5413	446	4		1157	1157	1157		dcf007684d8598380507220e605e8e2c_347	7ef7127a3f11d26e5ed74c78ba404004_7950	Pseudomonase_1_05196
glnD		bifunctional uridylyltransferase/uridylyl-removing protein GlnD	3	3	1	1	5417	546	1		2672	2672	2672		dcf007684d8598380507220e605e8e2c_353	7ef7127a3f11d26e5ed74c78ba404004_7944	Pseudomonase_1_05193
ispC		1-deoxy-D-xylulose-5-phosphate reductoisomerase	3	3	1	1	5423	436	4		1196	1196	1196		dcf007684d8598380507220e605e8e2c_365	7ef7127a3f11d26e5ed74c78ba404004_7932	Pseudomonase_1_05187
cdsA		phosphatidate cytidylyltransferase	3	3	1	1	5425	436	6		857	857	857		dcf007684d8598380507220e605e8e2c_369	7ef7127a3f11d26e5ed74c78ba404004_7928	Pseudomonase_1_05185
rseP		sigma E protease regulator RseP	3	3	1	1	5426	436	7		1352	1352	1352		dcf007684d8598380507220e605e8e2c_371	7ef7127a3f11d26e5ed74c78ba404004_7926	Pseudomonase_1_05184
bamA		outer membrane protein assembly factor BamA	3	3	1	1	5427	436	3		2432	2432	2432		dcf007684d8598380507220e605e8e2c_373	7ef7127a3f11d26e5ed74c78ba404004_7924	Pseudomonase_1_05183
skp		molecular chaperone Skp	3	3	1	1	5428	436	2		485	485	485		dcf007684d8598380507220e605e8e2c_375	7ef7127a3f11d26e5ed74c78ba404004_7922	Pseudomonase_1_05182
lpxD		UDP-3-O-(3-hydroxymyristoyl)glucosamine N-acyltransferase	3	3	1	1	5429	436	1		1025	1025	1025		dcf007684d8598380507220e605e8e2c_377	7ef7127a3f11d26e5ed74c78ba404004_7920	Pseudomonase_1_05181
lpxA		acyl-ACP--UDP-N-acetylglucosamine O-acyltransferase	3	3	1	1	5434	481	3		788	788	788		dcf007684d8598380507220e605e8e2c_381	7ef7127a3f11d26e5ed74c78ba404004_7916	Pseudomonase_1_05179
lpxB		lipid-A-disaccharide synthase	3	3	1	1	5435	481	2		1148	1148	1148		dcf007684d8598380507220e605e8e2c_383	7ef7127a3f11d26e5ed74c78ba404004_7914	Pseudomonase_1_05178
rnhB		ribonuclease HII	3	3	1	1	5436	481	1		596	596	596		dcf007684d8598380507220e605e8e2c_385	7ef7127a3f11d26e5ed74c78ba404004_7912	Pseudomonase_1_05177
ldcC		lysine decarboxylase LdcC	3	3	1	1	5439	415	5		2141	2141	2141		dcf007684d8598380507220e605e8e2c_391	7ef7127a3f11d26e5ed74c78ba404004_7906	Pseudomonase_1_05174
yaeR		VOC family protein	3	3	1	1	5440	415	6		389	389	389		dcf007684d8598380507220e605e8e2c_393	7ef7127a3f11d26e5ed74c78ba404004_7904	Pseudomonase_1_05173
tilS		tRNA lysidine(34) synthetase TilS	3	3	1	1	5441	415	7		1313	1313	1313		dcf007684d8598380507220e605e8e2c_395	7ef7127a3f11d26e5ed74c78ba404004_7902	Pseudomonase_1_05172
rof		Rho-binding antiterminator	3	3	1	1	5442	415	8		260	260	260		dcf007684d8598380507220e605e8e2c_397	7ef7127a3f11d26e5ed74c78ba404004_7900	Pseudomonase_1_05171
yaeP		YaeP family protein	3	3	1	1	5443	415	9		200	200	200		dcf007684d8598380507220e605e8e2c_399	7ef7127a3f11d26e5ed74c78ba404004_7898	Pseudomonase_1_05170
yaeQ		YaeQ family protein	3	3	1	1	5444	415	4		545	545	545		dcf007684d8598380507220e605e8e2c_401	7ef7127a3f11d26e5ed74c78ba404004_7896	Pseudomonase_1_05169
arfB		aminoacyl-tRNA hydrolase	3	3	1	1	5445	415	3		422	422	422		dcf007684d8598380507220e605e8e2c_403	7ef7127a3f11d26e5ed74c78ba404004_7894	Pseudomonase_1_05168
nlpE		envelope stress response activation lipoprotein NlpE	3	3	1	1	5446	415	2		710	710	710		dcf007684d8598380507220e605e8e2c_405	7ef7127a3f11d26e5ed74c78ba404004_7892	Pseudomonase_1_05167
yaeF		YaeF family permuted papain-like enzyme	3	3	1	1	5447	415	1		824	824	824		dcf007684d8598380507220e605e8e2c_407	7ef7127a3f11d26e5ed74c78ba404004_7890	Pseudomonase_1_05166
tsaA		tRNA (N6-threonylcarbamoyladenosine(37)-N6)-methyltransferase TrmO	3	3	1	1	5458	526	1		707	707	707		dcf007684d8598380507220e605e8e2c_411	7ef7127a3f11d26e5ed74c78ba404004_7886	Pseudomonase_1_05164
rcsF		Rcs stress response system protein RcsF	3	3	1	1	5459	526	2		404	404	404		dcf007684d8598380507220e605e8e2c_413	7ef7127a3f11d26e5ed74c78ba404004_7884	Pseudomonase_1_05163
metN		methionine ABC transporter ATP-binding protein MetN	3	3	1	1	5357	336	1		1031	1031	1031		dcf007684d8598380507220e605e8e2c_419	7ef7127a3f11d26e5ed74c78ba404004_7878	Pseudomonase_1_05160
gmhB		D-glycero-beta-D-manno-heptose 1,7-bisphosphate 7-phosphatase	3	3	1	1	5356	336	2		572	572	572		dcf007684d8598380507220e605e8e2c_421	7ef7127a3f11d26e5ed74c78ba404004_7876	Pseudomonase_1_05159
dkgB		2,5-didehydrogluconate reductase DkgB	3	3	1	1	5355	336	3		803	803	803		dcf007684d8598380507220e605e8e2c_423	7ef7127a3f11d26e5ed74c78ba404004_7856	Pseudomonase_1_08846
yafC		DNA-binding transcriptional regulator YafC	3	3	1	1	5354	336	5		914	914	914		dcf007684d8598380507220e605e8e2c_425	7ef7127a3f11d26e5ed74c78ba404004_7854	Pseudomonase_1_08847
WP_000211721.1		class I SAM-dependent methyltransferase	3	3	1	1	5351	336	31		770	770	770		dcf007684d8598380507220e605e8e2c_429	7ef7127a3f11d26e5ed74c78ba404004_7850	Pseudomonase_1_08850
gloB		hydroxyacylglutathione hydrolase	3	3	1	1	5349	336	29		755	755	755		dcf007684d8598380507220e605e8e2c_433	7ef7127a3f11d26e5ed74c78ba404004_7846	Pseudomonase_1_08852
yafS		class I SAM-dependent methyltransferase	3	3	1	1	5348	336	28		722	722	722		dcf007684d8598380507220e605e8e2c_435	7ef7127a3f11d26e5ed74c78ba404004_7844	Pseudomonase_1_08853
rnhA		ribonuclease HI	3	3	1	1	5347	336	27		467	467	467		dcf007684d8598380507220e605e8e2c_437	7ef7127a3f11d26e5ed74c78ba404004_7842	Pseudomonase_1_08854
WP_001049698.1		hypothetical protein	3	3	1	1	5345	336	25		785	785	785		dcf007684d8598380507220e605e8e2c_444	7ef7127a3f11d26e5ed74c78ba404004_7835	Pseudomonase_1_08857
WP_000013180.1		Hcp family type VI secretion system effector	3	3	1	1	5344	336	24		479	479	479		dcf007684d8598380507220e605e8e2c_446	7ef7127a3f11d26e5ed74c78ba404004_7833	Pseudomonase_1_08858
WP_000069182.1		type VI secretion system ImpA and VasL domain-containing protein	3	3	1	1	5343	336	23		1358	1358	1358		dcf007684d8598380507220e605e8e2c_448	7ef7127a3f11d26e5ed74c78ba404004_7831	Pseudomonase_1_08859
group_5819	tssA	type VI secretion system protein TssA	3	3	1	1	5341	336	21		1442	1442	1442		dcf007684d8598380507220e605e8e2c_452	7ef7127a3f11d26e5ed74c78ba404004_7827	Pseudomonase_1_08861
tagO		type VI secretion system-associated protein TagO	3	3	1	1	5340	336	20		743	743	743		dcf007684d8598380507220e605e8e2c_454	7ef7127a3f11d26e5ed74c78ba404004_7825	Pseudomonase_1_08862
group_5821	tssH	type VI secretion system ATPase TssH	3	3	1	1	5339	336	19		2762	2762	2762		dcf007684d8598380507220e605e8e2c_456	7ef7127a3f11d26e5ed74c78ba404004_7823	Pseudomonase_1_08863
icmH		type IVB secretion system protein IcmH/DotU	3	3	1	1	5338	336	18		764	764	764		dcf007684d8598380507220e605e8e2c_458	7ef7127a3f11d26e5ed74c78ba404004_7821	Pseudomonase_1_08864
group_5823	tssK	type VI secretion system baseplate subunit TssK	3	3	1	1	5337	336	17		1346	1346	1346		dcf007684d8598380507220e605e8e2c_460	7ef7127a3f11d26e5ed74c78ba404004_7819	Pseudomonase_1_08865
tssJ		type VI secretion system lipoprotein TssJ	3	3	1	1	5336	336	16		524	524	524		dcf007684d8598380507220e605e8e2c_462	7ef7127a3f11d26e5ed74c78ba404004_7817	Pseudomonase_1_08866
tagH		type VI secretion system-associated FHA domain protein TagH	3	3	1	1	5335	336	15		1280	1292	1288		dcf007684d8598380507220e605e8e2c_464	7ef7127a3f11d26e5ed74c78ba404004_7815	Pseudomonase_1_08867
tssG		type VI secretion system baseplate subunit TssG	3	3	1	1	5265	336	14		1049	1049	1049		dcf007684d8598380507220e605e8e2c_466	7ef7127a3f11d26e5ed74c78ba404004_7813	Pseudomonase_1_08868
tssF		type VI secretion system baseplate subunit TssF	3	3	1	1	5266	336	13		1841	1841	1841		dcf007684d8598380507220e605e8e2c_468	7ef7127a3f11d26e5ed74c78ba404004_7811	Pseudomonase_1_08869
tssE		type VI secretion system baseplate subunit TssE	3	3	1	1	5267	336	12		425	425	425		dcf007684d8598380507220e605e8e2c_470	7ef7127a3f11d26e5ed74c78ba404004_7809	Pseudomonase_1_08870
tssC		type VI secretion system contractile sheath large subunit	3	3	1	1	5268	336	11		1484	1484	1484		dcf007684d8598380507220e605e8e2c_472	7ef7127a3f11d26e5ed74c78ba404004_7807	Pseudomonase_1_08871
tssB		type VI secretion system contractile sheath small subunit	3	3	1	1	5269	336	10		503	503	503		dcf007684d8598380507220e605e8e2c_474	7ef7127a3f11d26e5ed74c78ba404004_7805	Pseudomonase_1_08872
WP_001142963.1		Hcp family type VI secretion system effector	3	3	1	1	5270	336	9		518	518	518		dcf007684d8598380507220e605e8e2c_476	7ef7127a3f11d26e5ed74c78ba404004_7803	Pseudomonase_1_08873
WP_000571853.1		DUF2169 domain-containing protein	3	3	1	1	5271	336	8		1046	1046	1046		dcf007684d8598380507220e605e8e2c_480	7ef7127a3f11d26e5ed74c78ba404004_7799	Pseudomonase_1_08876
WP_000513317.1		hypothetical protein	3	3	1	1	5273	354	4		290	290	290		dcf007684d8598380507220e605e8e2c_484	7ef7127a3f11d26e5ed74c78ba404004_7795	Pseudomonase_1_08879
WP_001298174.1		integrating conjugative element protein	3	3	1	1	5277	354	6		488	488	488		dcf007684d8598380507220e605e8e2c_490	7ef7127a3f11d26e5ed74c78ba404004_7715	Pseudomonase_1_08883
yafV		2-oxoglutaramate amidase	3	3	1	1	5278	354	7		770	770	770		dcf007684d8598380507220e605e8e2c_494	7ef7127a3f11d26e5ed74c78ba404004_7711	Pseudomonase_1_08884
ivy		Ivy family C-type lysozyme inhibitor	3	3	1	1	5279	354	8		446	446	446		dcf007684d8598380507220e605e8e2c_496	7ef7127a3f11d26e5ed74c78ba404004_7709	Pseudomonase_1_08885
fadE		acyl-CoA dehydrogenase FadE	3	3	1	1	5280	354	9		2444	2444	2444		dcf007684d8598380507220e605e8e2c_498	7ef7127a3f11d26e5ed74c78ba404004_7707	Pseudomonase_1_08886
lpcA		D-sedoheptulose 7-phosphate isomerase	3	3	1	1	5281	354	23		578	578	578		dcf007684d8598380507220e605e8e2c_500	7ef7127a3f11d26e5ed74c78ba404004_7705	Pseudomonase_1_08887
yafJ		class II glutamine amidotransferase	3	3	1	1	5282	354	22		767	767	767		dcf007684d8598380507220e605e8e2c_502	7ef7127a3f11d26e5ed74c78ba404004_7703	Pseudomonase_1_08888
dpaA		peptidoglycan meso-diaminopimelic acid protein amidase	3	3	1	1	5283	354	21		740	740	740		dcf007684d8598380507220e605e8e2c_504	7ef7127a3f11d26e5ed74c78ba404004_7701	Pseudomonase_1_08889
rayT		REP-associated tyrosine transposase RayT	3	3	1	1	5285	354	19		497	497	497		dcf007684d8598380507220e605e8e2c_508	7ef7127a3f11d26e5ed74c78ba404004_7697	Pseudomonase_1_08891
dinB		DNA polymerase IV	3	3	1	1	5288	354	16		1055	1055	1055		dcf007684d8598380507220e605e8e2c_514	7ef7127a3f11d26e5ed74c78ba404004_7691	Pseudomonase_1_08894
yafN		type I toxin-antitoxin system antitoxin YafN	3	3	1	1	5289	354	15		293	293	293		dcf007684d8598380507220e605e8e2c_516	7ef7127a3f11d26e5ed74c78ba404004_7689	Pseudomonase_1_08895
yafO		type II toxin-antitoxin system mRNA interferase toxin YafO	3	3	1	1	5290	354	14		398	398	398		dcf007684d8598380507220e605e8e2c_518	7ef7127a3f11d26e5ed74c78ba404004_7687	Pseudomonase_1_08896
WP_000521561.1		RNA ligase RtcB family protein	3	3	1	1	5292	354	12		1139	1139	1139		dcf007684d8598380507220e605e8e2c_522	7ef7127a3f11d26e5ed74c78ba404004_7683	Pseudomonase_1_08898
prfH		peptide chain release factor H	3	3	1	1	5293	354	11		614	614	614		dcf007684d8598380507220e605e8e2c_524	7ef7127a3f11d26e5ed74c78ba404004_7681	Pseudomonase_1_08899
pepD		cytosol nonspecific dipeptidase	3	3	1	1	5294	354	10		1457	1457	1457		dcf007684d8598380507220e605e8e2c_526	7ef7127a3f11d26e5ed74c78ba404004_7679	Pseudomonase_1_08900
frsA		esterase FrsA	3	3	1	1	5493	422	1		1244	1244	1244		dcf007684d8598380507220e605e8e2c_530	7ef7127a3f11d26e5ed74c78ba404004_7675	Pseudomonase_1_08902
crl		sigma factor-binding protein Crl	3	3	1	1	5494	422	2		401	401	401		dcf007684d8598380507220e605e8e2c_532	7ef7127a3f11d26e5ed74c78ba404004_7673	Pseudomonase_1_08903
phoE		phosphoporin PhoE	3	3	1	1	5495	422	3		1055	1055	1055		dcf007684d8598380507220e605e8e2c_534	7ef7127a3f11d26e5ed74c78ba404004_7671	Pseudomonase_1_08904
proB		glutamate 5-kinase	3	3	1	1	5496	422	4		1103	1103	1103		dcf007684d8598380507220e605e8e2c_536	7ef7127a3f11d26e5ed74c78ba404004_7669	Pseudomonase_1_08905
proA		glutamate-5-semialdehyde dehydrogenase	3	3	1	1	5497	422	8		1253	1253	1253		dcf007684d8598380507220e605e8e2c_538	7ef7127a3f11d26e5ed74c78ba404004_7667	Pseudomonase_1_08906
WP_001335540.1		hypothetical protein	3	3	1	1	5498	422	7		596	596	596		dcf007684d8598380507220e605e8e2c_543	7ef7127a3f11d26e5ed74c78ba404004_7662	Pseudomonase_1_08908
WP_000258743.1		hypothetical protein	3	3	1	1	5499	422	6		1637	1637	1637		dcf007684d8598380507220e605e8e2c_545	7ef7127a3f11d26e5ed74c78ba404004_7660	Pseudomonase_1_08909
WP_000266639.1		AlpA family phage regulatory protein	3	3	1	1	5500	422	5		227	227	227		dcf007684d8598380507220e605e8e2c_547	7ef7127a3f11d26e5ed74c78ba404004_7658	Pseudomonase_1_08910
WP_000144686.1		site-specific integrase	3	3	1	1	4843	411	5		1319	1319	1319		dcf007684d8598380507220e605e8e2c_564	7ef7127a3f11d26e5ed74c78ba404004_7517	Pseudomonase_1_09142
intS_4		Arm DNA-binding domain-containing protein	3	3	1	1	4842	411	6		335	338	336		dcf007684d8598380507220e605e8e2c_566	7ef7127a3f11d26e5ed74c78ba404004_7515	Pseudomonase_1_09141
vat		vacuolating autotransporter toxin Vat	3	3	1	1	4840	411	9		4130	4130	4130		dcf007684d8598380507220e605e8e2c_570	7ef7127a3f11d26e5ed74c78ba404004_7511	Pseudomonase_1_09139
yagU		YagU family protein	3	3	1	1	4839	411	10		614	614	614		dcf007684d8598380507220e605e8e2c_580	7ef7127a3f11d26e5ed74c78ba404004_7503	Pseudomonase_1_09138
ecpE		fimbrial chaperone EcpE	3	3	1	1	4836	411	1		710	710	710		dcf007684d8598380507220e605e8e2c_586	7ef7127a3f11d26e5ed74c78ba404004_7497	Pseudomonase_1_09137
ecpC		fimbrial usher EcpC	3	3	1	1	4608	511	1		2525	2525	2525		dcf007684d8598380507220e605e8e2c_590	7ef7127a3f11d26e5ed74c78ba404004_7493	Pseudomonase_1_09135
ecpB		fimbrial chaperone EcpB	3	3	1	1	4609	511	2		668	668	668		dcf007684d8598380507220e605e8e2c_592	7ef7127a3f11d26e5ed74c78ba404004_7491	Pseudomonase_1_09134
ecpR		ECP biosynthesis operon DNA-binding transcriptional regulator EcpR	3	3	1	1	4831	357	1		542	542	542		dcf007684d8598380507220e605e8e2c_596	7ef7127a3f11d26e5ed74c78ba404004_7487	Pseudomonase_1_09132
ykgO		type B 50S ribosomal protein L36	3	3	1	1	4830	357	2		140	140	140		dcf007684d8598380507220e605e8e2c_600	7ef7127a3f11d26e5ed74c78ba404004_7483	Pseudomonase_1_09131
WP_000662258.1		hypothetical protein	3	3	1	1	4828	357	4		101	101	101		dcf007684d8598380507220e605e8e2c_604	7ef7127a3f11d26e5ed74c78ba404004_7479	Pseudomonase_1_09129
WP_000182341.1		NADH-dependent flavin oxidoreductase	3	3	1	1	4827	357	5		1142	1142	1142		dcf007684d8598380507220e605e8e2c_606	7ef7127a3f11d26e5ed74c78ba404004_7477	Pseudomonase_1_09128
WP_000860032.1		alpha/beta hydrolase	3	3	1	1	4826	357	6		920	920	920		dcf007684d8598380507220e605e8e2c_608	7ef7127a3f11d26e5ed74c78ba404004_7475	Pseudomonase_1_09127
WP_001304867.1		LysR family transcriptional regulator	3	3	1	1	4825	357	7		926	926	926		dcf007684d8598380507220e605e8e2c_610	7ef7127a3f11d26e5ed74c78ba404004_7473	Pseudomonase_1_09126
WP_000910711.1		LysR family transcriptional regulator	3	3	1	1	4824	357	8		893	893	893		dcf007684d8598380507220e605e8e2c_612	7ef7127a3f11d26e5ed74c78ba404004_7471	Pseudomonase_1_09125
WP_001172293.1		aldo/keto reductase	3	3	1	1	4823	357	9		989	989	989		dcf007684d8598380507220e605e8e2c_614	7ef7127a3f11d26e5ed74c78ba404004_7469	Pseudomonase_1_09124
WP_001174452.1		aldo/keto reductase	3	3	1	1	4822	357	10		848	851	850		dcf007684d8598380507220e605e8e2c_616	7ef7127a3f11d26e5ed74c78ba404004_7467	Pseudomonase_1_09123
fdeC		inverse autotransporter adhesin FdeC	3	3	1	1	4821	357	11		4247	4247	4247		dcf007684d8598380507220e605e8e2c_618	7ef7127a3f11d26e5ed74c78ba404004_7465	Pseudomonase_1_09122
WP_000620997.1		helix-turn-helix domain-containing protein	3	3	1	1	4820	357	12		857	857	857		dcf007684d8598380507220e605e8e2c_620	7ef7127a3f11d26e5ed74c78ba404004_7463	Pseudomonase_1_09121
WP_001295799.1		aldo/keto reductase	3	3	1	1	4819	357	13		869	869	869		dcf007684d8598380507220e605e8e2c_622	7ef7127a3f11d26e5ed74c78ba404004_7461	Pseudomonase_1_09120
rclC		reactive chlorine species resistance protein RclC	3	3	1	1	4818	357	21		593	593	593		dcf007684d8598380507220e605e8e2c_624	7ef7127a3f11d26e5ed74c78ba404004_7459	Pseudomonase_1_09119
rclA		reactive chlorine resistance oxidoreductase RclA	3	3	1	1	4817	357	20		1325	1325	1325		dcf007684d8598380507220e605e8e2c_628	7ef7127a3f11d26e5ed74c78ba404004_7455	Pseudomonase_1_09118
rclR		reactive chlorine-specific transcriptional regulator RclR	3	3	1	1	4816	357	19		854	854	854		dcf007684d8598380507220e605e8e2c_630	7ef7127a3f11d26e5ed74c78ba404004_7453	Pseudomonase_1_09117
ykgE		(Fe-S)-binding protein	3	3	1	1	4815	357	18		719	719	719		dcf007684d8598380507220e605e8e2c_632	7ef7127a3f11d26e5ed74c78ba404004_7448	Pseudomonase_1_09116
ykgF		LutB/LldF family L-lactate oxidation iron-sulfur protein	3	3	1	1	4814	357	17		1427	1427	1427		dcf007684d8598380507220e605e8e2c_634	7ef7127a3f11d26e5ed74c78ba404004_7446	Pseudomonase_1_09115
ykgG		lactate utilization protein C	3	3	1	1	4813	357	16		695	695	695		dcf007684d8598380507220e605e8e2c_636	7ef7127a3f11d26e5ed74c78ba404004_7444	Pseudomonase_1_09114
WP_001005267.1		membrane protein	3	3	1	1	4812	357	15		668	668	668		dcf007684d8598380507220e605e8e2c_638	7ef7127a3f11d26e5ed74c78ba404004_7442	Pseudomonase_1_09113
ypdK		membrane protein YpdK	3	3	1	1	2975	30	13		71	71	71	1c58dc8b1c0b0cb7c89dc05980566ffe_9631	dcf007684d8598380507220e605e8e2c_4913	7ef7127a3f11d26e5ed74c78ba404004_3040
lacY		lactose permease	3	3	1	1	2498	17	22		1253	1253	1253		dcf007684d8598380507220e605e8e2c_702	7ef7127a3f11d26e5ed74c78ba404004_7375	Pseudomonase_1_10171
WP_000362014.1		PIG-L family deacetylase	3	3	1	1	4244	329	1		671	671	671		dcf007684d8598380507220e605e8e2c_724	7ef7127a3f11d26e5ed74c78ba404004_7350	Pseudomonase_1_06962
tauA		taurine ABC transporter substrate-binding protein	3	3	1	1	4514	329	33		962	962	962		dcf007684d8598380507220e605e8e2c_726	7ef7127a3f11d26e5ed74c78ba404004_7348	Pseudomonase_1_06963
tauB		taurine ABC transporter ATP-binding subunit	3	3	1	1	4515	329	32		767	767	767		dcf007684d8598380507220e605e8e2c_728	7ef7127a3f11d26e5ed74c78ba404004_7346	Pseudomonase_1_06964
tauC		taurine ABC transporter permease TauC	3	3	1	1	4516	329	31		827	827	827		dcf007684d8598380507220e605e8e2c_730	7ef7127a3f11d26e5ed74c78ba404004_7344	Pseudomonase_1_06965
tauD		taurine dioxygenase	3	3	1	1	4517	329	30		851	851	851		dcf007684d8598380507220e605e8e2c_732	7ef7127a3f11d26e5ed74c78ba404004_7342	Pseudomonase_1_06966
WP_000556418.1		autotransporter outer membrane beta-barrel domain-containing protein	3	3	1	1	4519	329	28		2987	2987	2987		dcf007684d8598380507220e605e8e2c_736	7ef7127a3f11d26e5ed74c78ba404004_7338	Pseudomonase_1_06968
iprA		hydrogen peroxide resistance inhibitor IprA	3	3	1	1	4520	329	27		623	623	623		dcf007684d8598380507220e605e8e2c_738	7ef7127a3f11d26e5ed74c78ba404004_7336	Pseudomonase_1_06969
ampH		D-alanyl-D-alanine-carboxypeptidase/endopeptidase AmpH	3	3	1	1	4521	329	26		1157	1157	1157		dcf007684d8598380507220e605e8e2c_740	7ef7127a3f11d26e5ed74c78ba404004_7334	Pseudomonase_1_06970
sbmA		peptide antibiotic transporter SbmA	3	3	1	1	4523	329	25		1220	1220	1220		dcf007684d8598380507220e605e8e2c_742	7ef7127a3f11d26e5ed74c78ba404004_7332	Pseudomonase_1_06972
yaiW		surface-exposed outer membrane lipoprotein YaiW	3	3	1	1	4524	329	24		1094	1094	1094		dcf007684d8598380507220e605e8e2c_744	7ef7127a3f11d26e5ed74c78ba404004_7330	Pseudomonase_1_06973
yaiY		YaiY family protein	3	3	1	1	4525	329	23		308	308	308		dcf007684d8598380507220e605e8e2c_746	7ef7127a3f11d26e5ed74c78ba404004_7328	Pseudomonase_1_06974
yaiZ		DUF2754 domain-containing protein	3	3	1	1	4526	329	22		212	212	212		dcf007684d8598380507220e605e8e2c_748	7ef7127a3f11d26e5ed74c78ba404004_7326	Pseudomonase_1_06975
ddlA		D-alanine--D-alanine ligase	3	3	1	1	4527	329	21		1094	1094	1094		dcf007684d8598380507220e605e8e2c_750	7ef7127a3f11d26e5ed74c78ba404004_7324	Pseudomonase_1_06976
iraP		anti-adapter protein IraP	3	3	1	1	4528	329	20		260	260	260		dcf007684d8598380507220e605e8e2c_754	7ef7127a3f11d26e5ed74c78ba404004_7320	Pseudomonase_1_06977
phoA		alkaline phosphatase	3	3	1	1	4529	329	19		1415	1415	1415		dcf007684d8598380507220e605e8e2c_756	7ef7127a3f11d26e5ed74c78ba404004_7318	Pseudomonase_1_06978
psiF		phosphate starvation-inducible protein PsiF	3	3	1	1	4530	329	18		320	320	320		dcf007684d8598380507220e605e8e2c_758	7ef7127a3f11d26e5ed74c78ba404004_7316	Pseudomonase_1_06979
adrA		diguanylate cyclase AdrA	3	3	1	1	4531	329	17		1115	1115	1115		dcf007684d8598380507220e605e8e2c_760	7ef7127a3f11d26e5ed74c78ba404004_7314	Pseudomonase_1_06980
proC		pyrroline-5-carboxylate reductase	3	3	1	1	4532	329	16		809	809	809		dcf007684d8598380507220e605e8e2c_762	7ef7127a3f11d26e5ed74c78ba404004_7312	Pseudomonase_1_06981
yaiI		YaiI/YqxD family protein	3	3	1	1	4533	329	15		458	458	458		dcf007684d8598380507220e605e8e2c_764	7ef7127a3f11d26e5ed74c78ba404004_7310	Pseudomonase_1_06982
aroL		shikimate kinase AroL	3	3	1	1	4534	329	14		524	524	524		dcf007684d8598380507220e605e8e2c_766	7ef7127a3f11d26e5ed74c78ba404004_7308	Pseudomonase_1_06983
yaiA		YaiA family protein	3	3	1	1	4535	329	13		191	191	191		dcf007684d8598380507220e605e8e2c_768	7ef7127a3f11d26e5ed74c78ba404004_7306	Pseudomonase_1_06984
aroM		AroM family protein	3	3	1	1	4536	329	12		677	677	677		dcf007684d8598380507220e605e8e2c_770	7ef7127a3f11d26e5ed74c78ba404004_7304	Pseudomonase_1_06985
ppnP		pyrimidine/purine nucleoside phosphorylase	3	3	1	1	4537	329	11		284	284	284		dcf007684d8598380507220e605e8e2c_772	7ef7127a3f11d26e5ed74c78ba404004_7302	Pseudomonase_1_06986
mak		fructokinase	3	3	1	1	4541	329	6		908	908	908		dcf007684d8598380507220e605e8e2c_780	7ef7127a3f11d26e5ed74c78ba404004_7294	Pseudomonase_1_06989
sbcC		exonuclease subunit SbcC	3	3	1	1	4543	329	4		3143	3143	3143		dcf007684d8598380507220e605e8e2c_784	7ef7127a3f11d26e5ed74c78ba404004_7290	Pseudomonase_1_06991
sbcD		exonuclease subunit SbcD	3	3	1	1	4544	329	3		1202	1202	1202		dcf007684d8598380507220e605e8e2c_786	7ef7127a3f11d26e5ed74c78ba404004_7288	Pseudomonase_1_06992
phoR		phosphate regulon sensor histidine kinase PhoR	3	3	1	1	4512	444	2		1295	1295	1295		dcf007684d8598380507220e605e8e2c_790	7ef7127a3f11d26e5ed74c78ba404004_7284	Pseudomonase_1_06994
brnQ		branched-chain amino acid transporter carrier protein BrnQ	3	3	1	1	63	444	3		1319	1319	1319		dcf007684d8598380507220e605e8e2c_792	7ef7127a3f11d26e5ed74c78ba404004_7282	Pseudomonase_1_06995
proY		proline-specific permease ProY	3	3	1	1	64	444	4		1373	1373	1373		dcf007684d8598380507220e605e8e2c_794	7ef7127a3f11d26e5ed74c78ba404004_7280	Pseudomonase_1_06996
malZ		maltodextrin glucosidase	3	3	1	1	65	444	5		1817	1817	1817		dcf007684d8598380507220e605e8e2c_796	7ef7127a3f11d26e5ed74c78ba404004_7278	Pseudomonase_1_06997
acpH		ACP phosphodiesterase	3	3	1	1	66	444	6		581	581	581		dcf007684d8598380507220e605e8e2c_798	7ef7127a3f11d26e5ed74c78ba404004_7276	Pseudomonase_1_06998
queA		tRNA preQ1(34) S-adenosylmethionine ribosyltransferase-isomerase QueA	3	3	1	1	67	444	1		1070	1070	1070		dcf007684d8598380507220e605e8e2c_800	7ef7127a3f11d26e5ed74c78ba404004_7274	Pseudomonase_1_06999
secD		protein translocase subunit SecD	3	3	1	1	62	434	1		1814	1847	1836		dcf007684d8598380507220e605e8e2c_806	7ef7127a3f11d26e5ed74c78ba404004_7268	Pseudomonase_1_07002
secF		protein translocase subunit SecF	3	3	1	1	61	434	2		971	971	971		dcf007684d8598380507220e605e8e2c_808	7ef7127a3f11d26e5ed74c78ba404004_7266	Pseudomonase_1_07003
yajD		HNH nuclease YajD	3	3	1	1	60	434	3		347	347	347		dcf007684d8598380507220e605e8e2c_810	7ef7127a3f11d26e5ed74c78ba404004_7264	Pseudomonase_1_07004
tsx		nucleoside-specific channel-forming protein Tsx	3	3	1	1	37	434	4		884	884	884		dcf007684d8598380507220e605e8e2c_812	7ef7127a3f11d26e5ed74c78ba404004_7262	Pseudomonase_1_07005
yajI		DUF3251 domain-containing protein	3	3	1	1	38	434	5		539	539	539		dcf007684d8598380507220e605e8e2c_814	7ef7127a3f11d26e5ed74c78ba404004_7260	Pseudomonase_1_07006
nrdR		transcriptional regulator NrdR	3	3	1	1	39	434	7		449	449	449		dcf007684d8598380507220e605e8e2c_816	7ef7127a3f11d26e5ed74c78ba404004_7258	Pseudomonase_1_07007
ribD		bifunctional diaminohydroxyphosphoribosylaminopyrimidine deaminase/5-amino-6-(5-phosphoribosylamino)uracil reductase RibD	3	3	1	1	40	434	6		1103	1103	1103		dcf007684d8598380507220e605e8e2c_818	7ef7127a3f11d26e5ed74c78ba404004_7256	Pseudomonase_1_07008
nusB		transcription antitermination factor NusB	3	3	1	1	59	355	5		419	419	419		dcf007684d8598380507220e605e8e2c_822	7ef7127a3f11d26e5ed74c78ba404004_7252	Pseudomonase_1_07010
thiL		thiamine-phosphate kinase	3	3	1	1	58	355	6		977	977	977		dcf007684d8598380507220e605e8e2c_824	7ef7127a3f11d26e5ed74c78ba404004_7250	Pseudomonase_1_07011
pgpA		phosphatidylglycerophosphatase A	3	3	1	1	57	355	7		518	518	518		dcf007684d8598380507220e605e8e2c_826	7ef7127a3f11d26e5ed74c78ba404004_7248	Pseudomonase_1_07012
yajO		1-deoxyxylulose-5-phosphate synthase YajO	3	3	1	1	56	355	8		974	974	974		dcf007684d8598380507220e605e8e2c_828	7ef7127a3f11d26e5ed74c78ba404004_7246	Pseudomonase_1_07013
dxs		1-deoxy-D-xylulose-5-phosphate synthase	3	3	1	1	55	355	9		1862	1862	1862		dcf007684d8598380507220e605e8e2c_830	7ef7127a3f11d26e5ed74c78ba404004_7244	Pseudomonase_1_07014
ispA		(2E,6E)-farnesyl diphosphate synthase	3	3	1	1	54	355	10		899	899	899		dcf007684d8598380507220e605e8e2c_832	7ef7127a3f11d26e5ed74c78ba404004_7242	Pseudomonase_1_07015
xseB		exodeoxyribonuclease VII small subunit	3	3	1	1	53	355	11		242	242	242		dcf007684d8598380507220e605e8e2c_834	7ef7127a3f11d26e5ed74c78ba404004_7240	Pseudomonase_1_07016
thiI		tRNA 4-thiouridine(8) synthase ThiI	3	3	1	1	52	355	12		1448	1448	1448		dcf007684d8598380507220e605e8e2c_836	7ef7127a3f11d26e5ed74c78ba404004_7238	Pseudomonase_1_07017
yajL		protein deglycase YajL	3	3	1	1	51	355	13		590	590	590		dcf007684d8598380507220e605e8e2c_838	7ef7127a3f11d26e5ed74c78ba404004_7236	Pseudomonase_1_07018
panE		2-dehydropantoate 2-reductase	3	3	1	1	50	355	14		911	911	911		dcf007684d8598380507220e605e8e2c_840	7ef7127a3f11d26e5ed74c78ba404004_7234	Pseudomonase_1_07019
yajQ		nucleotide binding protein YajQ	3	3	1	1	49	355	15		491	491	491		dcf007684d8598380507220e605e8e2c_842	7ef7127a3f11d26e5ed74c78ba404004_7232	Pseudomonase_1_07020
yajR		MFS transporter	3	3	1	1	48	355	16		1364	1364	1364		dcf007684d8598380507220e605e8e2c_844	7ef7127a3f11d26e5ed74c78ba404004_7230	Pseudomonase_1_07021
cyoE		heme o synthase	3	3	1	1	47	355	17		890	890	890		dcf007684d8598380507220e605e8e2c_846	7ef7127a3f11d26e5ed74c78ba404004_7228	Pseudomonase_1_07022
cyoD		cytochrome o ubiquinol oxidase subunit IV	3	3	1	1	46	355	18		329	329	329		dcf007684d8598380507220e605e8e2c_848	7ef7127a3f11d26e5ed74c78ba404004_7226	Pseudomonase_1_07023
cyoC		cytochrome o ubiquinol oxidase subunit III	3	3	1	1	45	355	19		614	614	614		dcf007684d8598380507220e605e8e2c_850	7ef7127a3f11d26e5ed74c78ba404004_7224	Pseudomonase_1_07024
cyoB		cytochrome o ubiquinol oxidase subunit I	3	3	1	1	44	355	20		1991	1991	1991		dcf007684d8598380507220e605e8e2c_852	7ef7127a3f11d26e5ed74c78ba404004_7222	Pseudomonase_1_07025
cyoA		cytochrome o ubiquinol oxidase subunit II	3	3	1	1	43	355	21		947	947	947		dcf007684d8598380507220e605e8e2c_854	7ef7127a3f11d26e5ed74c78ba404004_7220	Pseudomonase_1_07026
ampG		muropeptide MFS transporter AmpG	3	3	1	1	42	355	4		1475	1475	1475		dcf007684d8598380507220e605e8e2c_856	7ef7127a3f11d26e5ed74c78ba404004_7218	Pseudomonase_1_07027
yajG		lipoprotein	3	3	1	1	41	355	3		578	578	578		dcf007684d8598380507220e605e8e2c_858	7ef7127a3f11d26e5ed74c78ba404004_7216	Pseudomonase_1_07028
bolA		transcriptional regulator BolA	3	3	1	1	35	355	2		314	317	316		dcf007684d8598380507220e605e8e2c_860	7ef7127a3f11d26e5ed74c78ba404004_7214	Pseudomonase_1_07029
tig		trigger factor	3	3	1	1	36	355	1		1298	1298	1298		dcf007684d8598380507220e605e8e2c_862	7ef7127a3f11d26e5ed74c78ba404004_7212	Pseudomonase_1_07030
ppiD		peptidylprolyl isomerase	3	3	1	1	119	417	5		1871	1871	1871		dcf007684d8598380507220e605e8e2c_872	7ef7127a3f11d26e5ed74c78ba404004_7202	Pseudomonase_1_07035
ybaV		helix-hairpin-helix domain-containing protein	3	3	1	1	118	417	6		371	371	371		dcf007684d8598380507220e605e8e2c_874	7ef7127a3f11d26e5ed74c78ba404004_7200	Pseudomonase_1_07036
fadM		long-chain acyl-CoA thioesterase FadM	3	3	1	1	117	417	7		398	398	398		dcf007684d8598380507220e605e8e2c_876	7ef7127a3f11d26e5ed74c78ba404004_7198	Pseudomonase_1_07037
queC		7-cyano-7-deazaguanine synthase QueC	3	3	1	1	134	417	8		695	695	695		dcf007684d8598380507220e605e8e2c_878	7ef7127a3f11d26e5ed74c78ba404004_7196	Pseudomonase_1_07038
ybaE		SgrR family transcriptional regulator	3	3	1	1	135	417	9		1700	1700	1700		dcf007684d8598380507220e605e8e2c_880	7ef7127a3f11d26e5ed74c78ba404004_7194	Pseudomonase_1_07039
cof		HMP-PP phosphatase	3	3	1	1	136	417	4		818	818	818		dcf007684d8598380507220e605e8e2c_882	7ef7127a3f11d26e5ed74c78ba404004_7192	Pseudomonase_1_07040
decR		DNA-binding transcriptional regulator DecR	3	3	1	1	137	417	3		458	458	458		dcf007684d8598380507220e605e8e2c_884	7ef7127a3f11d26e5ed74c78ba404004_7190	Pseudomonase_1_07041
mdlA		SmdA family multidrug ABC transporter permease/ATP-binding protein	3	3	1	1	138	417	2		1772	1772	1772		dcf007684d8598380507220e605e8e2c_886	7ef7127a3f11d26e5ed74c78ba404004_7188	Pseudomonase_1_07042
mdlB		SmdB family multidrug efflux ABC transporter permease/ATP-binding protein	3	3	1	1	139	417	1		1781	1781	1781		dcf007684d8598380507220e605e8e2c_888	7ef7127a3f11d26e5ed74c78ba404004_7186	Pseudomonase_1_07043
amtB		ammonium transporter AmtB	3	3	1	1	133	421	1		1286	1286	1286		dcf007684d8598380507220e605e8e2c_892	7ef7127a3f11d26e5ed74c78ba404004_7182	Pseudomonase_1_07045
tesB		acyl-CoA thioesterase II	3	3	1	1	132	421	2		860	860	860		dcf007684d8598380507220e605e8e2c_894	7ef7127a3f11d26e5ed74c78ba404004_7180	Pseudomonase_1_07046
ybaY		YbaY family lipoprotein	3	3	1	1	131	421	3		572	572	572		dcf007684d8598380507220e605e8e2c_896	7ef7127a3f11d26e5ed74c78ba404004_7178	Pseudomonase_1_07047
WP_000409908.1		MGMT family protein	3	3	1	1	29	421	4		311	311	311		dcf007684d8598380507220e605e8e2c_898	7ef7127a3f11d26e5ed74c78ba404004_7176	Pseudomonase_1_07048
ybaA		DUF1428 family protein	3	3	1	1	30	421	5		353	353	353		dcf007684d8598380507220e605e8e2c_903	7ef7127a3f11d26e5ed74c78ba404004_7171	Pseudomonase_1_07049
pdeB		cyclic-guanylate-specific phosphodiesterase PdeB	3	3	1	1	31	421	6		1550	1550	1550		dcf007684d8598380507220e605e8e2c_905	7ef7127a3f11d26e5ed74c78ba404004_7169	Pseudomonase_1_07050
ylaC		YlaC family protein	3	3	1	1	32	421	8		470	470	470		dcf007684d8598380507220e605e8e2c_907	7ef7127a3f11d26e5ed74c78ba404004_7167	Pseudomonase_1_07051
maa		maltose O-acetyltransferase	3	3	1	1	33	421	7		551	551	551		dcf007684d8598380507220e605e8e2c_909	7ef7127a3f11d26e5ed74c78ba404004_7165	Pseudomonase_1_07052
tomB		Hha toxicity modulator TomB	3	3	1	1	19	410	5		374	374	374		dcf007684d8598380507220e605e8e2c_913	7ef7127a3f11d26e5ed74c78ba404004_7161	Pseudomonase_1_07054
acrB		efflux RND transporter permease AcrB	3	3	1	1	20	410	6		3149	3149	3149		dcf007684d8598380507220e605e8e2c_915	7ef7127a3f11d26e5ed74c78ba404004_7159	Pseudomonase_1_07055
acrA		multidrug efflux RND transporter periplasmic adaptor subunit AcrA	3	3	1	1	21	410	7		1193	1193	1193		dcf007684d8598380507220e605e8e2c_917	7ef7127a3f11d26e5ed74c78ba404004_7157	Pseudomonase_1_07056
WP_000080200.1		hypothetical protein	3	3	1	1	4302	17	54		80	1613	613	1c58dc8b1c0b0cb7c89dc05980566ffe_11033	dcf007684d8598380507220e605e8e2c_4109	7ef7127a3f11d26e5ed74c78ba404004_3746
acrR		multidrug efflux transporter transcriptional repressor AcrR	3	3	1	1	22	410	8		647	647	647		dcf007684d8598380507220e605e8e2c_919	7ef7127a3f11d26e5ed74c78ba404004_7155	Pseudomonase_1_07057
mscK		mechanosensitive channel MscK	3	3	1	1	23	410	9		3362	3362	3362		dcf007684d8598380507220e605e8e2c_921	7ef7127a3f11d26e5ed74c78ba404004_7153	Pseudomonase_1_07058
rsmS		pleiotropic regulatory protein RsmS	3	3	1	1	24	410	10		161	161	161		dcf007684d8598380507220e605e8e2c_923	7ef7127a3f11d26e5ed74c78ba404004_7151	Pseudomonase_1_07059
priC		primosomal replication protein N''	3	3	1	1	25	410	4		527	527	527		dcf007684d8598380507220e605e8e2c_925	7ef7127a3f11d26e5ed74c78ba404004_7149	Pseudomonase_1_07060
ybaN		DUF454 family protein	3	3	1	1	26	410	3		377	377	377		dcf007684d8598380507220e605e8e2c_927	7ef7127a3f11d26e5ed74c78ba404004_7147	Pseudomonase_1_07061
apt		adenine phosphoribosyltransferase	3	3	1	1	27	410	2		551	551	551		dcf007684d8598380507220e605e8e2c_929	7ef7127a3f11d26e5ed74c78ba404004_7145	Pseudomonase_1_07062
dnaX		DNA polymerase III subunit gamma/tau	3	3	1	1	28	410	1		1931	1931	1931		dcf007684d8598380507220e605e8e2c_931	7ef7127a3f11d26e5ed74c78ba404004_7142	Pseudomonase_1_07063
htpG		molecular chaperone HtpG	3	3	1	1	183	549	1		1874	1874	1874		dcf007684d8598380507220e605e8e2c_938	7ef7127a3f11d26e5ed74c78ba404004_7136	Pseudomonase_1_07066
hemH		ferrochelatase	3	3	1	1	18	315	1		962	962	962		dcf007684d8598380507220e605e8e2c_942	7ef7127a3f11d26e5ed74c78ba404004_7132	Pseudomonase_1_07068
aes		acetyl esterase	3	3	1	1	17	315	2		968	968	968		dcf007684d8598380507220e605e8e2c_944	7ef7127a3f11d26e5ed74c78ba404004_7130	Pseudomonase_1_07069
gsk		inosine/guanosine kinase	3	3	1	1	16	315	3		1304	1304	1304		dcf007684d8598380507220e605e8e2c_946	7ef7127a3f11d26e5ed74c78ba404004_7128	Pseudomonase_1_07070
ybaL		Kef family K(+) transporter	3	3	1	1	15	315	48		1676	1676	1676		dcf007684d8598380507220e605e8e2c_948	7ef7127a3f11d26e5ed74c78ba404004_7126	Pseudomonase_1_07071
fsr		fosmidomycin MFS transporter	3	3	1	1	14	315	47		1220	1220	1220		dcf007684d8598380507220e605e8e2c_950	7ef7127a3f11d26e5ed74c78ba404004_7124	Pseudomonase_1_07072
ushA		bifunctional UDP-sugar hydrolase/5'-nucleotidase	3	3	1	1	13	315	46		1652	1652	1652		dcf007684d8598380507220e605e8e2c_952	7ef7127a3f11d26e5ed74c78ba404004_7122	Pseudomonase_1_07073
WP_000667000.1		hypothetical protein	3	3	1	1	12	315	45		503	503	503		dcf007684d8598380507220e605e8e2c_954	7ef7127a3f11d26e5ed74c78ba404004_7120	Pseudomonase_1_07074
WP_000439798.1		hypothetical protein	3	3	1	1	11	315	44		800	800	800		dcf007684d8598380507220e605e8e2c_956	7ef7127a3f11d26e5ed74c78ba404004_7118	Pseudomonase_1_07075
ybaK		Cys-tRNA(Pro)/Cys-tRNA(Cys) deacylase YbaK	3	3	1	1	10	315	43		479	479	479		dcf007684d8598380507220e605e8e2c_958	7ef7127a3f11d26e5ed74c78ba404004_7116	Pseudomonase_1_07076
ybaP		TraB/GumN family protein	3	3	1	1	9	315	42		794	794	794		dcf007684d8598380507220e605e8e2c_960	7ef7127a3f11d26e5ed74c78ba404004_7114	Pseudomonase_1_07077
WP_000057523.1		type II toxin-antitoxin system RelE/ParE family toxin	3	3	1	1	8	315	41		302	302	302		dcf007684d8598380507220e605e8e2c_962	7ef7127a3f11d26e5ed74c78ba404004_7112	Pseudomonase_1_07078
ybaQ		HigA family addiction module antitoxin	3	3	1	1	7	315	40		341	341	341		dcf007684d8598380507220e605e8e2c_964	7ef7127a3f11d26e5ed74c78ba404004_7110	Pseudomonase_1_07079
copA		copper-exporting P-type ATPase CopA	3	3	1	1	6	315	39		2504	2504	2504		dcf007684d8598380507220e605e8e2c_966	7ef7127a3f11d26e5ed74c78ba404004_7108	Pseudomonase_1_07080
glsA		glutaminase A	3	3	1	1	5	315	38		932	932	932		dcf007684d8598380507220e605e8e2c_968	7ef7127a3f11d26e5ed74c78ba404004_7106	Pseudomonase_1_07081
ybaT		APC family permease	3	3	1	1	4	315	37		1292	1292	1292		dcf007684d8598380507220e605e8e2c_970	7ef7127a3f11d26e5ed74c78ba404004_7104	Pseudomonase_1_07082
cueR		Cu(I)-responsive transcriptional regulator	3	3	1	1	3	315	36		407	407	407		dcf007684d8598380507220e605e8e2c_974	7ef7127a3f11d26e5ed74c78ba404004_7100	Pseudomonase_1_07083
WP_000492614.1		hypothetical protein	3	3	1	1	202	315	35		1223	1223	1223		dcf007684d8598380507220e605e8e2c_976	7ef7127a3f11d26e5ed74c78ba404004_7098	Pseudomonase_1_07084
ybbJ		NfeD family protein	3	3	1	1	203	315	34		458	458	458		dcf007684d8598380507220e605e8e2c_978	7ef7127a3f11d26e5ed74c78ba404004_7096	Pseudomonase_1_07085
qmcA		SPFH/Band 7/PHB domain protein	3	3	1	1	204	315	33		917	917	917		dcf007684d8598380507220e605e8e2c_980	7ef7127a3f11d26e5ed74c78ba404004_7094	Pseudomonase_1_07086
fetA		iron ABC transporter ATP-binding protein FetA	3	3	1	1	205	315	32		677	677	677		dcf007684d8598380507220e605e8e2c_982	7ef7127a3f11d26e5ed74c78ba404004_7092	Pseudomonase_1_07087
fetB		iron export ABC transporter permease subunit FetB	3	3	1	1	206	315	31		779	779	779		dcf007684d8598380507220e605e8e2c_984	7ef7127a3f11d26e5ed74c78ba404004_7090	Pseudomonase_1_07088
cnoX		chaperedoxin	3	3	1	1	207	315	30		854	854	854		dcf007684d8598380507220e605e8e2c_986	7ef7127a3f11d26e5ed74c78ba404004_7088	Pseudomonase_1_07089
ybbA		ABC transporter ATP-binding protein	3	3	1	1	210	315	27		686	686	686		dcf007684d8598380507220e605e8e2c_992	7ef7127a3f11d26e5ed74c78ba404004_7082	Pseudomonase_1_07092
ybbP		ABC transporter permease	3	3	1	1	211	315	26		2414	2414	2414		dcf007684d8598380507220e605e8e2c_994	7ef7127a3f11d26e5ed74c78ba404004_7080	Pseudomonase_1_07093
mnmH		tRNA 2-selenouridine(34) synthase MnmH	3	3	1	1	212	315	25		1094	1094	1094		dcf007684d8598380507220e605e8e2c_996	7ef7127a3f11d26e5ed74c78ba404004_7078	Pseudomonase_1_07094
allS		HTH-type transcriptional activator AllS	3	3	1	1	213	315	24		926	926	926		dcf007684d8598380507220e605e8e2c_998	7ef7127a3f11d26e5ed74c78ba404004_7076	Pseudomonase_1_07095
allA		ureidoglycolate lyase	3	3	1	1	214	315	23		482	482	482		dcf007684d8598380507220e605e8e2c_1000	7ef7127a3f11d26e5ed74c78ba404004_7074	Pseudomonase_1_07096
allR		HTH-type transcriptional repressor AllR	3	3	1	1	215	315	22		815	815	815		dcf007684d8598380507220e605e8e2c_1002	7ef7127a3f11d26e5ed74c78ba404004_7072	Pseudomonase_1_07097
gcl		glyoxylate carboligase	3	3	1	1	216	315	21		1781	1781	1781		dcf007684d8598380507220e605e8e2c_1004	7ef7127a3f11d26e5ed74c78ba404004_7070	Pseudomonase_1_07098
hyi		hydroxypyruvate isomerase	3	3	1	1	217	315	20		776	776	776		dcf007684d8598380507220e605e8e2c_1006	7ef7127a3f11d26e5ed74c78ba404004_7068	Pseudomonase_1_07099
glxR		2-hydroxy-3-oxopropionate reductase	3	3	1	1	218	315	19		878	878	878		dcf007684d8598380507220e605e8e2c_1008	7ef7127a3f11d26e5ed74c78ba404004_7066	Pseudomonase_1_07100
ybbW		putative allantoin permease	3	3	1	1	219	315	18		1454	1454	1454		dcf007684d8598380507220e605e8e2c_1010	7ef7127a3f11d26e5ed74c78ba404004_7064	Pseudomonase_1_07101
allB		allantoinase AllB	3	3	1	1	220	315	17		1361	1361	1361		dcf007684d8598380507220e605e8e2c_1012	7ef7127a3f11d26e5ed74c78ba404004_7062	Pseudomonase_1_07102
ybbY		uracil/xanthine transporter	3	3	1	1	221	315	16		1301	1301	1301		dcf007684d8598380507220e605e8e2c_1014	7ef7127a3f11d26e5ed74c78ba404004_7060	Pseudomonase_1_07103
glxK		glycerate 3-kinase	3	3	1	1	222	315	15		1145	1145	1145		dcf007684d8598380507220e605e8e2c_1016	7ef7127a3f11d26e5ed74c78ba404004_7058	Pseudomonase_1_07104
allE		(S)-ureidoglycine aminohydrolase	3	3	1	1	223	315	14		785	785	785		dcf007684d8598380507220e605e8e2c_1018	7ef7127a3f11d26e5ed74c78ba404004_7056	Pseudomonase_1_07105
allC		allantoate deiminase	3	3	1	1	224	315	13		1235	1235	1235		dcf007684d8598380507220e605e8e2c_1020	7ef7127a3f11d26e5ed74c78ba404004_7054	Pseudomonase_1_07106
allD		ureidoglycolate dehydrogenase	3	3	1	1	225	315	12		1049	1049	1049		dcf007684d8598380507220e605e8e2c_1022	7ef7127a3f11d26e5ed74c78ba404004_7052	Pseudomonase_1_07107
group_6046	fdrA	acyl-CoA synthetase FdrA	3	3	1	1	226	315	11		1667	1667	1667		dcf007684d8598380507220e605e8e2c_1024	7ef7127a3f11d26e5ed74c78ba404004_7050	Pseudomonase_1_07108
ylbE		DUF1116 domain-containing protein	3	3	1	1	227	315	10		1259	1259	1259		dcf007684d8598380507220e605e8e2c_1026	7ef7127a3f11d26e5ed74c78ba404004_7048	Pseudomonase_1_07109
ylbF		DUF2877 domain-containing protein	3	3	1	1	228	315	9		815	815	815		dcf007684d8598380507220e605e8e2c_1028	7ef7127a3f11d26e5ed74c78ba404004_7046	Pseudomonase_1_07110
ybcF		carbamate kinase	3	3	1	1	229	315	8		893	893	893		dcf007684d8598380507220e605e8e2c_1030	7ef7127a3f11d26e5ed74c78ba404004_7044	Pseudomonase_1_07111
purK		5-(carboxyamino)imidazole ribonucleotide synthase	3	3	1	1	230	315	7		1067	1067	1067		dcf007684d8598380507220e605e8e2c_1032	7ef7127a3f11d26e5ed74c78ba404004_7042	Pseudomonase_1_07112
purE		5-(carboxyamino)imidazole ribonucleotide mutase	3	3	1	1	231	315	6		509	509	509		dcf007684d8598380507220e605e8e2c_1034	7ef7127a3f11d26e5ed74c78ba404004_7040	Pseudomonase_1_07113
WP_001188438.1		hypothetical protein	3	3	1	1	232	315	5		329	329	329		dcf007684d8598380507220e605e8e2c_1036	7ef7127a3f11d26e5ed74c78ba404004_7038	Pseudomonase_1_07114
lpxH		UDP-2,3-diacylglucosamine diphosphatase	3	3	1	1	233	315	4		722	722	722		dcf007684d8598380507220e605e8e2c_1038	7ef7127a3f11d26e5ed74c78ba404004_7036	Pseudomonase_1_07115
ybcI		metal-dependent hydrolase	3	3	1	1	10997	307	1		521	521	521		dcf007684d8598380507220e605e8e2c_1044	7ef7127a3f11d26e5ed74c78ba404004_7030	Pseudomonase_1_07118
ybcJ		ribosome-associated protein YbcJ	3	3	1	1	10996	307	2		212	212	212		dcf007684d8598380507220e605e8e2c_1046	7ef7127a3f11d26e5ed74c78ba404004_7028	Pseudomonase_1_07119
folD		bifunctional methylenetetrahydrofolate dehydrogenase/methenyltetrahydrofolate cyclohydrolase FolD	3	3	1	1	10995	307	4		866	866	866		dcf007684d8598380507220e605e8e2c_1048	7ef7127a3f11d26e5ed74c78ba404004_7026	Pseudomonase_1_07120
WP_000741334.1		site-specific integrase	3	3	1	1	10974	307	420		1142	1142	1142		dcf007684d8598380507220e605e8e2c_1059	7ef7127a3f11d26e5ed74c78ba404004_5680	Pseudomonase_1_09296
WP_000088653.1		excisionase	3	3	1	1	518	307	421		236	236	236		dcf007684d8598380507220e605e8e2c_1061	7ef7127a3f11d26e5ed74c78ba404004_5678	Pseudomonase_1_09295
WP_000186790.1		YqaJ viral recombinase family protein	3	3	1	1	514	307	436		680	680	680		dcf007684d8598380507220e605e8e2c_1073	7ef7127a3f11d26e5ed74c78ba404004_5652	Pseudomonase_1_09291
bet		phage recombination protein Bet	3	3	1	1	513	307	437		785	785	785		dcf007684d8598380507220e605e8e2c_1075	7ef7127a3f11d26e5ed74c78ba404004_5650	Pseudomonase_1_09290
WP_001577005.1		host-nuclease inhibitor protein Gam	3	3	1	1	512	307	438		296	296	296		dcf007684d8598380507220e605e8e2c_1077	7ef7127a3f11d26e5ed74c78ba404004_5648	Pseudomonase_1_09289
kil		host cell division inhibitory peptide Kil	3	3	1	1	511	307	440		143	143	143		dcf007684d8598380507220e605e8e2c_1079	7ef7127a3f11d26e5ed74c78ba404004_5646	Pseudomonase_1_09288
WP_001066176.1		superinfection exclusion B family protein	3	3	1	1	507	307	444		581	581	581		dcf007684d8598380507220e605e8e2c_1085	7ef7127a3f11d26e5ed74c78ba404004_5638	Pseudomonase_1_09285
WP_000968518.1		DUF1828 domain-containing protein	3	3	1	1	506	307	446		749	752	751		dcf007684d8598380507220e605e8e2c_1091	7ef7127a3f11d26e5ed74c78ba404004_5632	Pseudomonase_1_09284
WP_001062368.1		hypothetical protein	3	3	1	1	504	307	447		557	557	557		dcf007684d8598380507220e605e8e2c_1093	7ef7127a3f11d26e5ed74c78ba404004_5630	Pseudomonase_1_09283
WP_000067727.1		helix-turn-helix transcriptional regulator	3	3	1	1	502	307	449		215	215	215		dcf007684d8598380507220e605e8e2c_1097	7ef7127a3f11d26e5ed74c78ba404004_5626	Pseudomonase_1_09281
WP_000185431.1		replication protein	3	3	1	1	500	307	458		899	899	899		dcf007684d8598380507220e605e8e2c_1101	7ef7127a3f11d26e5ed74c78ba404004_5622	Pseudomonase_1_09279
WP_000788872.1		replication protein P	3	3	1	1	499	307	457		701	701	701		dcf007684d8598380507220e605e8e2c_1103	7ef7127a3f11d26e5ed74c78ba404004_5620	Pseudomonase_1_09278
WP_000145927.1		protein ren	3	3	1	1	498	307	456		290	290	290		dcf007684d8598380507220e605e8e2c_1105	7ef7127a3f11d26e5ed74c78ba404004_5618	Pseudomonase_1_09277
WP_000153286.1		phage N-6-adenine-methyltransferase	3	3	1	1	496	307	454		527	527	527		dcf007684d8598380507220e605e8e2c_1109	7ef7127a3f11d26e5ed74c78ba404004_5614	Pseudomonase_1_04607
WP_000386643.1		DUF2591 family protein	3	3	1	1	495	307	453		341	341	341		dcf007684d8598380507220e605e8e2c_1113	7ef7127a3f11d26e5ed74c78ba404004_5610	Pseudomonase_1_04608
rusA		crossover junction endodeoxyribonuclease RusA	3	3	1	1	492	307	88		362	362	362		dcf007684d8598380507220e605e8e2c_1119	7ef7127a3f11d26e5ed74c78ba404004_5604	Pseudomonase_1_04609
quuD		antitermination protein QuuD	3	3	1	1	490	307	90		383	383	383		dcf007684d8598380507220e605e8e2c_1123	7ef7127a3f11d26e5ed74c78ba404004_5600	Pseudomonase_1_04611
group_6083	ompC	porin OmpC	3	3	1	1	489	307	91		1082	1082	1082		dcf007684d8598380507220e605e8e2c_1125	7ef7127a3f11d26e5ed74c78ba404004_5598	Pseudomonase_1_04612
essD		phage lysis protein EssD	3	3	1	1	488	307	92		215	215	215		dcf007684d8598380507220e605e8e2c_1127	7ef7127a3f11d26e5ed74c78ba404004_5596	Pseudomonase_1_04613
rrrD		lysozyme RrrD	3	3	1	1	487	307	93		497	497	497		dcf007684d8598380507220e605e8e2c_1129	7ef7127a3f11d26e5ed74c78ba404004_5594	Pseudomonase_1_04614
iss		increased serum survival lipoprotein Iss	3	3	1	1	485	307	95		293	293	293		dcf007684d8598380507220e605e8e2c_1133	7ef7127a3f11d26e5ed74c78ba404004_5590	Pseudomonase_1_04616
WP_000830178.1		TonB family protein	3	3	1	1	484	307	96		326	326	326		dcf007684d8598380507220e605e8e2c_1135	7ef7127a3f11d26e5ed74c78ba404004_5588	Pseudomonase_1_04617
WP_000867568.1		terminase small subunit	3	3	1	1	482	307	98		548	548	548		dcf007684d8598380507220e605e8e2c_1139	7ef7127a3f11d26e5ed74c78ba404004_5584	Pseudomonase_1_04619
WP_000258997.1		phage head-stabilizing protein	3	3	1	1	480	307	100		206	206	206		dcf007684d8598380507220e605e8e2c_1143	7ef7127a3f11d26e5ed74c78ba404004_5580	Pseudomonase_1_04621
WP_000831761.1		phage portal protein	3	3	1	1	479	307	101		1592	1592	1592		dcf007684d8598380507220e605e8e2c_1145	7ef7127a3f11d26e5ed74c78ba404004_5578	Pseudomonase_1_04622
WP_001253913.1		S49 family peptidase	3	3	1	1	478	307	102		1505	1505	1505		dcf007684d8598380507220e605e8e2c_1147	7ef7127a3f11d26e5ed74c78ba404004_5576	Pseudomonase_1_04623
WP_000256840.1		head decoration protein	3	3	1	1	477	307	103		347	347	347		dcf007684d8598380507220e605e8e2c_1149	7ef7127a3f11d26e5ed74c78ba404004_5574	Pseudomonase_1_04624
WP_000522649.1		major capsid protein	3	3	1	1	476	307	104		1028	1028	1028		dcf007684d8598380507220e605e8e2c_1151	7ef7127a3f11d26e5ed74c78ba404004_5572	Pseudomonase_1_04625
WP_000201530.1		DNA-packaging protein FI	3	3	1	1	770	307	105		374	374	374		dcf007684d8598380507220e605e8e2c_1153	7ef7127a3f11d26e5ed74c78ba404004_5570	Pseudomonase_1_04626
WP_001204540.1		head-tail joining protein	3	3	1	1	771	307	106		353	353	353		dcf007684d8598380507220e605e8e2c_1155	7ef7127a3f11d26e5ed74c78ba404004_5568	Pseudomonase_1_04627
WP_000975062.1		phage tail protein	3	3	1	1	772	307	107		578	578	578		dcf007684d8598380507220e605e8e2c_1157	7ef7127a3f11d26e5ed74c78ba404004_5566	Pseudomonase_1_04628
WP_001351266.1		phage tail protein	3	3	1	1	774	307	109		740	740	740		dcf007684d8598380507220e605e8e2c_1161	7ef7127a3f11d26e5ed74c78ba404004_5562	Pseudomonase_1_04630
WP_000479129.1		phage minor tail protein G	3	3	1	1	775	307	110		422	422	422		dcf007684d8598380507220e605e8e2c_1163	7ef7127a3f11d26e5ed74c78ba404004_5560	Pseudomonase_1_04631
WP_000459474.1		phage tail assembly protein T	3	3	1	1	776	307	111		434	434	434		dcf007684d8598380507220e605e8e2c_1165	7ef7127a3f11d26e5ed74c78ba404004_5558	Pseudomonase_1_04632
WP_000840269.1		phage tail tape measure protein	3	3	1	1	777	307	112		2561	2561	2561		dcf007684d8598380507220e605e8e2c_1167	7ef7127a3f11d26e5ed74c78ba404004_5556	Pseudomonase_1_04633
WP_000847405.1		phage tail protein	3	3	1	1	778	307	113		329	329	329		dcf007684d8598380507220e605e8e2c_1169	7ef7127a3f11d26e5ed74c78ba404004_5554	Pseudomonase_1_04634
WP_000239877.1		class I SAM-dependent methyltransferase	3	3	1	1	10992	307	418		656	668	664		dcf007684d8598380507220e605e8e2c_1173	7ef7127a3f11d26e5ed74c78ba404004_7015	Pseudomonase_1_02341
ompT		omptin family outer membrane protease OmpT	3	3	1	1	10991	307	417		953	953	953		dcf007684d8598380507220e605e8e2c_1175	7ef7127a3f11d26e5ed74c78ba404004_7013	Pseudomonase_1_02340
ybcH		DUF4434 family protein	3	3	1	1	10990	307	416		890	890	890		dcf007684d8598380507220e605e8e2c_1177	7ef7127a3f11d26e5ed74c78ba404004_7011	Pseudomonase_1_02339
nfrA		bacteriophage adsorption protein NfrA	3	3	1	1	10989	307	415		2972	2972	2972		dcf007684d8598380507220e605e8e2c_1179	7ef7127a3f11d26e5ed74c78ba404004_7009	Pseudomonase_1_02338
group_6108	nrfB	cyclic di-3',5'-guanylate-activated glycosyltransferase NrfB	3	3	1	1	10988	307	414		2237	2237	2237		dcf007684d8598380507220e605e8e2c_1181	7ef7127a3f11d26e5ed74c78ba404004_7007	Pseudomonase_1_02337
cusS		Cu(+)/Ag(+) sensor histidine kinase CusS	3	3	1	1	10987	307	413		1442	1442	1442		dcf007684d8598380507220e605e8e2c_1183	7ef7127a3f11d26e5ed74c78ba404004_7005	Pseudomonase_1_02336
cusR		copper response regulator transcription factor CusR	3	3	1	1	10986	307	412		683	683	683		dcf007684d8598380507220e605e8e2c_1185	7ef7127a3f11d26e5ed74c78ba404004_7003	Pseudomonase_1_02335
cusC		Cu(+)/Ag(+) efflux RND transporter outer membrane channel CusC	3	3	1	1	10985	307	411		1382	1382	1382		dcf007684d8598380507220e605e8e2c_1187	7ef7127a3f11d26e5ed74c78ba404004_7001	Pseudomonase_1_02334
cusF		Cu(+)/Ag(+) efflux RND transporter periplasmic metallochaperone CusF	3	3	1	1	10984	307	410		332	332	332		dcf007684d8598380507220e605e8e2c_1189	7ef7127a3f11d26e5ed74c78ba404004_6999	Pseudomonase_1_02333
cusB		Cu(+)/Ag(+) efflux RND transporter periplasmic adaptor subunit CusB	3	3	1	1	10983	307	409		1223	1223	1223		dcf007684d8598380507220e605e8e2c_1191	7ef7127a3f11d26e5ed74c78ba404004_6997	Pseudomonase_1_02332
cusA		Cu(+)/Ag(+) efflux RND transporter permease subunit CusA	3	3	1	1	10982	307	408		3143	3143	3143		dcf007684d8598380507220e605e8e2c_1193	7ef7127a3f11d26e5ed74c78ba404004_6995	Pseudomonase_1_02331
pheP		phenylalanine transporter	3	3	1	1	10981	307	407		1382	1382	1382		dcf007684d8598380507220e605e8e2c_1195	7ef7127a3f11d26e5ed74c78ba404004_6993	Pseudomonase_1_02330
ybdG		mechanosensitive ion channel YbdG	3	3	1	1	10980	307	406		1247	1247	1247		dcf007684d8598380507220e605e8e2c_1197	7ef7127a3f11d26e5ed74c78ba404004_6991	Pseudomonase_1_02329
nfsB		oxygen-insensitive NAD(P)H nitroreductase	3	3	1	1	10979	307	405		653	653	653		dcf007684d8598380507220e605e8e2c_1199	7ef7127a3f11d26e5ed74c78ba404004_6989	Pseudomonase_1_02328
ybdF		MmcQ/YjbR family DNA-binding protein	3	3	1	1	10978	307	404		383	383	383		dcf007684d8598380507220e605e8e2c_1201	7ef7127a3f11d26e5ed74c78ba404004_6987	Pseudomonase_1_02327
ybdJ		DUF1158 domain-containing protein	3	3	1	1	10977	307	403		248	248	248		dcf007684d8598380507220e605e8e2c_1203	7ef7127a3f11d26e5ed74c78ba404004_6985	Pseudomonase_1_02326
ybdK		YbdK family carboxylate-amine ligase	3	3	1	1	10976	307	402		1118	1118	1118		dcf007684d8598380507220e605e8e2c_1205	7ef7127a3f11d26e5ed74c78ba404004_6983	Pseudomonase_1_02325
hokE		type I toxin-antitoxin system toxin HokE	3	3	1	1	3988	307	399		152	152	152		dcf007684d8598380507220e605e8e2c_1207	7ef7127a3f11d26e5ed74c78ba404004_6981	Pseudomonase_1_02322
fepA		siderophore enterobactin receptor FepA	3	3	1	1	3958	307	397		2249	2249	2249		dcf007684d8598380507220e605e8e2c_1211	7ef7127a3f11d26e5ed74c78ba404004_6977	Pseudomonase_1_02319
fes		enterochelin esterase	3	3	1	1	3957	307	396		1202	1202	1202		dcf007684d8598380507220e605e8e2c_1213	7ef7127a3f11d26e5ed74c78ba404004_6975	Pseudomonase_1_02318
ybdZ		enterobactin biosynthesis protein YbdZ	3	3	1	1	3956	307	395		218	218	218		dcf007684d8598380507220e605e8e2c_1215	7ef7127a3f11d26e5ed74c78ba404004_6973	Pseudomonase_1_02317
entF		enterobactin non-ribosomal peptide synthetase EntF	3	3	1	1	3955	307	394		3881	3881	3881		dcf007684d8598380507220e605e8e2c_1217	7ef7127a3f11d26e5ed74c78ba404004_6971	Pseudomonase_1_02316
wzz(fepE)		LPS O-antigen length regulator Wzz(fepE)	3	3	1	1	3954	307	393		1133	1133	1133		dcf007684d8598380507220e605e8e2c_1219	7ef7127a3f11d26e5ed74c78ba404004_6969	Pseudomonase_1_02315
fepC		iron-enterobactin ABC transporter ATP-binding protein	3	3	1	1	3953	307	392		815	815	815		dcf007684d8598380507220e605e8e2c_1221	7ef7127a3f11d26e5ed74c78ba404004_6967	Pseudomonase_1_02314
fepG		iron-enterobactin ABC transporter permease	3	3	1	1	3952	307	391		992	992	992		dcf007684d8598380507220e605e8e2c_1223	7ef7127a3f11d26e5ed74c78ba404004_6965	Pseudomonase_1_02313
fepD		Fe(3+)-siderophore ABC transporter permease	3	3	1	1	3951	307	390		1004	1004	1004		dcf007684d8598380507220e605e8e2c_1225	7ef7127a3f11d26e5ed74c78ba404004_6963	Pseudomonase_1_02312
entS		enterobactin transporter EntS	3	3	1	1	3950	307	389		1250	1250	1250		dcf007684d8598380507220e605e8e2c_1227	7ef7127a3f11d26e5ed74c78ba404004_6961	Pseudomonase_1_02311
fepB		Fe2+-enterobactin ABC transporter substrate-binding protein	3	3	1	1	3949	307	388		956	956	956		dcf007684d8598380507220e605e8e2c_1229	7ef7127a3f11d26e5ed74c78ba404004_6959	Pseudomonase_1_02310
entC		isochorismate synthase EntC	3	3	1	1	3948	307	387		1175	1175	1175		dcf007684d8598380507220e605e8e2c_1231	7ef7127a3f11d26e5ed74c78ba404004_6957	Pseudomonase_1_02309
entE		(2,3-dihydroxybenzoyl)adenylate synthase EntE	3	3	1	1	3947	307	386		1610	1610	1610		dcf007684d8598380507220e605e8e2c_1233	7ef7127a3f11d26e5ed74c78ba404004_6955	Pseudomonase_1_02308
entB		enterobactin biosynthesis bifunctional isochorismatase/aryl carrier protein EntB	3	3	1	1	3946	307	385		857	857	857		dcf007684d8598380507220e605e8e2c_1235	7ef7127a3f11d26e5ed74c78ba404004_6953	Pseudomonase_1_02307
entA		2,3-dihydro-2,3-dihydroxybenzoate dehydrogenase EntA	3	3	1	1	3945	307	384		746	746	746		dcf007684d8598380507220e605e8e2c_1237	7ef7127a3f11d26e5ed74c78ba404004_6951	Pseudomonase_1_02306
entH		proofreading thioesterase EntH	3	3	1	1	3944	307	383		413	413	413		dcf007684d8598380507220e605e8e2c_1239	7ef7127a3f11d26e5ed74c78ba404004_6949	Pseudomonase_1_02305
cstA		pyruvate/proton symporter CstA	3	3	1	1	3943	307	382		2105	2105	2105		dcf007684d8598380507220e605e8e2c_1241	7ef7127a3f11d26e5ed74c78ba404004_6947	Pseudomonase_1_02304
ybdD		YbdD/YjiX family protein	3	3	1	1	3942	307	381		197	197	197		dcf007684d8598380507220e605e8e2c_1243	7ef7127a3f11d26e5ed74c78ba404004_6945	Pseudomonase_1_02303
hcxA		hydroxycarboxylate dehydrogenase HcxA	3	3	1	1	3941	307	380		1088	1088	1088		dcf007684d8598380507220e605e8e2c_1245	7ef7127a3f11d26e5ed74c78ba404004_6943	Pseudomonase_1_02302
ybdL		methionine-oxo-acid transaminase	3	3	1	1	985	307	379		1160	1160	1160		dcf007684d8598380507220e605e8e2c_1247	7ef7127a3f11d26e5ed74c78ba404004_6941	Pseudomonase_1_02301
ybdM		ParB/RepB/Spo0J family partition protein	3	3	1	1	986	307	378		629	629	629		dcf007684d8598380507220e605e8e2c_1249	7ef7127a3f11d26e5ed74c78ba404004_6939	Pseudomonase_1_02300
ybdN		phosphoadenosine phosphosulfate reductase	3	3	1	1	987	307	377		1220	1220	1220		dcf007684d8598380507220e605e8e2c_1251	7ef7127a3f11d26e5ed74c78ba404004_6937	Pseudomonase_1_02299
ybdO		LysR family transcriptional regulator	3	3	1	1	988	307	376		902	902	902		dcf007684d8598380507220e605e8e2c_1253	7ef7127a3f11d26e5ed74c78ba404004_6935	Pseudomonase_1_02298
dsbG		thiol:disulfide interchange protein DsbG	3	3	1	1	989	307	375		746	746	746		dcf007684d8598380507220e605e8e2c_1255	7ef7127a3f11d26e5ed74c78ba404004_6933	Pseudomonase_1_02297
uspG		universal stress protein UspG	3	3	1	1	994	383	2		428	428	428		dcf007684d8598380507220e605e8e2c_1261	7ef7127a3f11d26e5ed74c78ba404004_6927	Pseudomonase_1_02294
rnk		nucleoside diphosphate kinase regulator	3	3	1	1	993	383	3		410	410	410		dcf007684d8598380507220e605e8e2c_1263	7ef7127a3f11d26e5ed74c78ba404004_6925	Pseudomonase_1_02293
rna		ribonuclease I	3	3	1	1	992	383	4		806	806	806		dcf007684d8598380507220e605e8e2c_1265	7ef7127a3f11d26e5ed74c78ba404004_6923	Pseudomonase_1_02292
citT		citrate/succinate antiporter CitT	3	3	1	1	991	383	5		1463	1463	1463		dcf007684d8598380507220e605e8e2c_1267	7ef7127a3f11d26e5ed74c78ba404004_6921	Pseudomonase_1_02291
citG		triphosphoribosyl-dephospho-CoA synthase CitG	3	3	1	1	990	383	6		878	878	878		dcf007684d8598380507220e605e8e2c_1269	7ef7127a3f11d26e5ed74c78ba404004_6919	Pseudomonase_1_02290
citX		citrate lyase holo-[acyl-carrier protein] synthase	3	3	1	1	939	383	7		551	551	551		dcf007684d8598380507220e605e8e2c_1271	7ef7127a3f11d26e5ed74c78ba404004_6917	Pseudomonase_1_02289
citF		citrate lyase subunit alpha	3	3	1	1	940	383	8		1532	1532	1532		dcf007684d8598380507220e605e8e2c_1273	7ef7127a3f11d26e5ed74c78ba404004_6915	Pseudomonase_1_02288
citE		citrate (pro-3S)-lyase subunit beta	3	3	1	1	941	383	9		908	908	908		dcf007684d8598380507220e605e8e2c_1275	7ef7127a3f11d26e5ed74c78ba404004_6913	Pseudomonase_1_02287
citD		citrate lyase acyl carrier protein	3	3	1	1	942	383	10		296	296	296		dcf007684d8598380507220e605e8e2c_1277	7ef7127a3f11d26e5ed74c78ba404004_6911	Pseudomonase_1_02286
citC		[citrate (pro-3S)-lyase] ligase	3	3	1	1	943	383	11		1058	1058	1058		dcf007684d8598380507220e605e8e2c_1279	7ef7127a3f11d26e5ed74c78ba404004_6909	Pseudomonase_1_02285
dpiB		sensor histidine kinase DpiB	3	3	1	1	944	383	15		1658	1658	1658		dcf007684d8598380507220e605e8e2c_1281	7ef7127a3f11d26e5ed74c78ba404004_6907	Pseudomonase_1_02284
dpiA		two-component response regulator DpiA	3	3	1	1	945	383	14		680	680	680		dcf007684d8598380507220e605e8e2c_1283	7ef7127a3f11d26e5ed74c78ba404004_6905	Pseudomonase_1_02283
dcuC		anaerobic C4-dicarboxylate transporter DcuC	3	3	1	1	946	383	13		1385	1385	1385		dcf007684d8598380507220e605e8e2c_1285	7ef7127a3f11d26e5ed74c78ba404004_6903	Pseudomonase_1_02282
pagP		lipid IV(A) palmitoyltransferase PagP	3	3	1	1	947	383	12		560	560	560		dcf007684d8598380507220e605e8e2c_1287	7ef7127a3f11d26e5ed74c78ba404004_6901	Pseudomonase_1_02281
crcB		fluoride efflux transporter CrcB	3	3	1	1	1006	496	3		383	383	383		dcf007684d8598380507220e605e8e2c_1291	7ef7127a3f11d26e5ed74c78ba404004_6897	Pseudomonase_1_02279
WP_001298343.1		deaminated glutathione amidase	3	3	1	1	1007	496	2		788	788	788		dcf007684d8598380507220e605e8e2c_1293	7ef7127a3f11d26e5ed74c78ba404004_6895	Pseudomonase_1_02278
tatE		twin-arginine translocase subunit TatE	3	3	1	1	1008	496	1		203	203	203		dcf007684d8598380507220e605e8e2c_1295	7ef7127a3f11d26e5ed74c78ba404004_6893	Pseudomonase_1_02277
lipB		lipoyl(octanoyl) transferase LipB	3	3	1	1	935	523	1		641	641	641		dcf007684d8598380507220e605e8e2c_1301	7ef7127a3f11d26e5ed74c78ba404004_6887	Pseudomonase_1_02274
dacA		D-alanyl-D-alanine carboxypeptidase DacA	3	3	1	1	1013	524	2		1211	1211	1211		dcf007684d8598380507220e605e8e2c_1305	7ef7127a3f11d26e5ed74c78ba404004_6883	Pseudomonase_1_02272
rlpA		endolytic peptidoglycan transglycosylase RlpA	3	3	1	1	1014	524	1		1088	1088	1088		dcf007684d8598380507220e605e8e2c_1307	7ef7127a3f11d26e5ed74c78ba404004_6881	Pseudomonase_1_02271
mrdA		peptidoglycan DD-transpeptidase MrdA	3	3	1	1	1020	433	1		1901	1901	1901		dcf007684d8598380507220e605e8e2c_1311	7ef7127a3f11d26e5ed74c78ba404004_6877	Pseudomonase_1_02269
rlmH		23S rRNA (pseudouridine(1915)-N(3))-methyltransferase RlmH	3	3	1	1	1021	433	2		467	467	467		dcf007684d8598380507220e605e8e2c_1313	7ef7127a3f11d26e5ed74c78ba404004_6875	Pseudomonase_1_02268
rsfS		ribosome silencing factor	3	3	1	1	1022	433	3		317	317	317		dcf007684d8598380507220e605e8e2c_1315	7ef7127a3f11d26e5ed74c78ba404004_6873	Pseudomonase_1_02267
cobC		adenosylcobalamin/alpha-ribazole phosphatase	3	3	1	1	1023	433	4		611	611	611		dcf007684d8598380507220e605e8e2c_1317	7ef7127a3f11d26e5ed74c78ba404004_6871	Pseudomonase_1_02266
nadD		nicotinate-nucleotide adenylyltransferase	3	3	1	1	1024	433	7		641	641	641		dcf007684d8598380507220e605e8e2c_1319	7ef7127a3f11d26e5ed74c78ba404004_6869	Pseudomonase_1_02265
holA		DNA polymerase III subunit delta	3	3	1	1	1025	433	6		1031	1031	1031		dcf007684d8598380507220e605e8e2c_1321	7ef7127a3f11d26e5ed74c78ba404004_6867	Pseudomonase_1_02264
lptE		LPS assembly lipoprotein LptE	3	3	1	1	1026	433	5		581	581	581		dcf007684d8598380507220e605e8e2c_1323	7ef7127a3f11d26e5ed74c78ba404004_6865	Pseudomonase_1_02263
ybeL		zinc ribbon-containing protein	3	3	1	1	1032	420	1		482	482	482		dcf007684d8598380507220e605e8e2c_1327	7ef7127a3f11d26e5ed74c78ba404004_6861	Pseudomonase_1_02261
rihA		pyrimidine-specific ribonucleoside hydrolase RihA	3	3	1	1	1033	420	2		935	935	935		dcf007684d8598380507220e605e8e2c_1329	7ef7127a3f11d26e5ed74c78ba404004_6859	Pseudomonase_1_02260
gltL		glutamate/aspartate ABC transporter ATP-binding protein GltL	3	3	1	1	1034	420	8		725	725	725		dcf007684d8598380507220e605e8e2c_1331	7ef7127a3f11d26e5ed74c78ba404004_6857	Pseudomonase_1_02259
gltK		glutamate/aspartate ABC transporter permease GltK	3	3	1	1	1035	420	7		674	674	674		dcf007684d8598380507220e605e8e2c_1333	7ef7127a3f11d26e5ed74c78ba404004_6855	Pseudomonase_1_02258
gltJ		glutamate/aspartate ABC transporter permease GltJ	3	3	1	1	1036	420	6		740	740	740		dcf007684d8598380507220e605e8e2c_1335	7ef7127a3f11d26e5ed74c78ba404004_6853	Pseudomonase_1_02257
gltI		glutamate/aspartate ABC transporter substrate-binding protein GltI	3	3	1	1	1037	420	5		908	908	908		dcf007684d8598380507220e605e8e2c_1337	7ef7127a3f11d26e5ed74c78ba404004_6851	Pseudomonase_1_02256
WP_001276744.1		rhomboid family intramembrane serine protease	3	3	1	1	1038	420	4		1877	1877	1877		dcf007684d8598380507220e605e8e2c_1339	7ef7127a3f11d26e5ed74c78ba404004_6849	Pseudomonase_1_02255
lnt		apolipoprotein N-acyltransferase	3	3	1	1	1039	420	3		1538	1538	1538		dcf007684d8598380507220e605e8e2c_1341	7ef7127a3f11d26e5ed74c78ba404004_6847	Pseudomonase_1_02254
ybeY		rRNA maturation RNase YbeY	3	3	1	1	1043	554	1		467	467	467		dcf007684d8598380507220e605e8e2c_1345	7ef7127a3f11d26e5ed74c78ba404004_6843	Pseudomonase_1_02252
ubiF		3-demethoxyubiquinol 3-hydroxylase	3	3	1	1	1047	360	19		1175	1175	1175		dcf007684d8598380507220e605e8e2c_1351	7ef7127a3f11d26e5ed74c78ba404004_6837	Pseudomonase_1_02249
asnB		asparagine synthase B	3	3	1	1	1048	360	18		1664	1664	1664		dcf007684d8598380507220e605e8e2c_1353	7ef7127a3f11d26e5ed74c78ba404004_6814	Pseudomonase_1_02241
nagD		ribonucleotide monophosphatase NagD	3	3	1	1	1049	360	17		752	752	752		dcf007684d8598380507220e605e8e2c_1355	7ef7127a3f11d26e5ed74c78ba404004_6812	Pseudomonase_1_02240
nagC		DNA-binding transcriptional regulator NagC	3	3	1	1	1050	360	16		1220	1220	1220		dcf007684d8598380507220e605e8e2c_1357	7ef7127a3f11d26e5ed74c78ba404004_6810	Pseudomonase_1_02239
nagA		N-acetylglucosamine-6-phosphate deacetylase	3	3	1	1	1051	360	15		1148	1148	1148		dcf007684d8598380507220e605e8e2c_1359	7ef7127a3f11d26e5ed74c78ba404004_6808	Pseudomonase_1_02238
nagB		glucosamine-6-phosphate deaminase	3	3	1	1	1052	360	14		800	800	800		dcf007684d8598380507220e605e8e2c_1361	7ef7127a3f11d26e5ed74c78ba404004_6806	Pseudomonase_1_02237
nagE		PTS N-acetyl glucosamine transporter subunit IIABC	3	3	1	1	1053	360	13		1946	1946	1946		dcf007684d8598380507220e605e8e2c_1363	7ef7127a3f11d26e5ed74c78ba404004_6804	Pseudomonase_1_02236
WP_000177663.1		SLC13 family permease	3	3	1	1	1054	360	12		1280	1280	1280		dcf007684d8598380507220e605e8e2c_1365	7ef7127a3f11d26e5ed74c78ba404004_6802	Pseudomonase_1_02235
WP_000583483.1		YhcH/YjgK/YiaL family protein	3	3	1	1	1055	360	11		470	470	470		dcf007684d8598380507220e605e8e2c_1367	7ef7127a3f11d26e5ed74c78ba404004_6800	Pseudomonase_1_02234
WP_000109424.1		exo-alpha-sialidase	3	3	1	1	1056	360	10		1169	1169	1169		dcf007684d8598380507220e605e8e2c_1369	7ef7127a3f11d26e5ed74c78ba404004_6798	Pseudomonase_1_02233
WP_000480539.1		TerC family protein	3	3	1	1	1057	360	9		758	758	758		dcf007684d8598380507220e605e8e2c_1371	7ef7127a3f11d26e5ed74c78ba404004_6796	Pseudomonase_1_02232
WP_001126957.1		dihydrodipicolinate synthase family protein	3	3	1	1	1058	360	8		887	887	887		dcf007684d8598380507220e605e8e2c_1373	7ef7127a3f11d26e5ed74c78ba404004_6794	Pseudomonase_1_02231
WP_000234744.1		iron-containing alcohol dehydrogenase	3	3	1	1	1059	360	7		1157	1157	1157		dcf007684d8598380507220e605e8e2c_1375	7ef7127a3f11d26e5ed74c78ba404004_6792	Pseudomonase_1_02230
dtnK_1		four-carbon acid sugar kinase family protein	3	3	1	1	1060	360	6		1235	1235	1235		dcf007684d8598380507220e605e8e2c_1377	7ef7127a3f11d26e5ed74c78ba404004_6790	Pseudomonase_1_02229
WP_001059578.1		D-threonate 4-phosphate dehydrogenase	3	3	1	1	1061	360	5		986	986	986		dcf007684d8598380507220e605e8e2c_1379	7ef7127a3f11d26e5ed74c78ba404004_6788	Pseudomonase_1_02228
WP_000679501.1		DeoR/GlpR family DNA-binding transcription regulator	3	3	1	1	1062	360	4		761	761	761		dcf007684d8598380507220e605e8e2c_1381	7ef7127a3f11d26e5ed74c78ba404004_6786	Pseudomonase_1_02227
glnS		glutamine--tRNA ligase	3	3	1	1	1063	360	3		1664	1664	1664		dcf007684d8598380507220e605e8e2c_1383	7ef7127a3f11d26e5ed74c78ba404004_6784	Pseudomonase_1_02226
chiP		chitoporin	3	3	1	1	1064	360	2		1406	1406	1406		dcf007684d8598380507220e605e8e2c_1385	7ef7127a3f11d26e5ed74c78ba404004_6782	Pseudomonase_1_02225
chiQ		ChiQ/YbfN family lipoprotein	3	3	1	1	1065	360	1		326	326	326		dcf007684d8598380507220e605e8e2c_1387	7ef7127a3f11d26e5ed74c78ba404004_6780	Pseudomonase_1_02224
ybfF		esterase	3	3	1	1	1068	499	3		764	764	764		dcf007684d8598380507220e605e8e2c_1397	7ef7127a3f11d26e5ed74c78ba404004_6770	Pseudomonase_1_02220
seqA		replication initiation negative regulator SeqA	3	3	1	1	1067	499	1		545	545	545		dcf007684d8598380507220e605e8e2c_1399	7ef7127a3f11d26e5ed74c78ba404004_6768	Pseudomonase_1_02219
potE		putrescine-ornithine antiporter	3	3	1	1	1075	362	6		1319	1319	1319		dcf007684d8598380507220e605e8e2c_1403	7ef7127a3f11d26e5ed74c78ba404004_6764	Pseudomonase_1_02217
speF		ornithine decarboxylase SpeF	3	3	1	1	1076	362	7		2198	2198	2198		dcf007684d8598380507220e605e8e2c_1405	7ef7127a3f11d26e5ed74c78ba404004_6762	Pseudomonase_1_02216
kdpE		two-component system response regulator KdpE	3	3	1	1	1078	362	9		677	677	677		dcf007684d8598380507220e605e8e2c_1409	7ef7127a3f11d26e5ed74c78ba404004_6758	Pseudomonase_1_02215
kdpD		two-component system sensor histidine kinase KdpD	3	3	1	1	1079	362	10		2684	2684	2684		dcf007684d8598380507220e605e8e2c_1411	7ef7127a3f11d26e5ed74c78ba404004_6756	Pseudomonase_1_02214
kdpC		K(+)-transporting ATPase subunit C	3	3	1	1	1080	362	11		572	572	572		dcf007684d8598380507220e605e8e2c_1413	7ef7127a3f11d26e5ed74c78ba404004_6754	Pseudomonase_1_02213
kdpB		potassium-transporting ATPase subunit KdpB	3	3	1	1	1081	362	12		2048	2048	2048		dcf007684d8598380507220e605e8e2c_1415	7ef7127a3f11d26e5ed74c78ba404004_6752	Pseudomonase_1_02212
kdpA		potassium-transporting ATPase subunit KdpA	3	3	1	1	1082	362	13		1673	1673	1673		dcf007684d8598380507220e605e8e2c_1417	7ef7127a3f11d26e5ed74c78ba404004_6750	Pseudomonase_1_02211
ybfA		YbfA family protein	3	3	1	1	1084	362	15		206	206	206		dcf007684d8598380507220e605e8e2c_1421	7ef7127a3f11d26e5ed74c78ba404004_6746	Pseudomonase_1_02210
ybgA		YbgA family protein	3	3	1	1	1085	362	16		509	509	509		dcf007684d8598380507220e605e8e2c_1423	7ef7127a3f11d26e5ed74c78ba404004_6744	Pseudomonase_1_02209
phrB		deoxyribodipyrimidine photo-lyase	3	3	1	1	1086	362	17		1418	1418	1418		dcf007684d8598380507220e605e8e2c_1425	7ef7127a3f11d26e5ed74c78ba404004_6742	Pseudomonase_1_02208
dtpD		dipeptide permease DtpD	3	3	1	1	1087	362	18		1481	1481	1481		dcf007684d8598380507220e605e8e2c_1427	7ef7127a3f11d26e5ed74c78ba404004_6740	Pseudomonase_1_02207
ybgI		radiation resistance protein YbgI	3	3	1	1	1088	362	19		743	743	743		dcf007684d8598380507220e605e8e2c_1429	7ef7127a3f11d26e5ed74c78ba404004_6738	Pseudomonase_1_02206
pxpB		5-oxoprolinase subunit PxpB	3	3	1	1	1089	362	20		656	656	656		dcf007684d8598380507220e605e8e2c_1431	7ef7127a3f11d26e5ed74c78ba404004_6736	Pseudomonase_1_02205
pxpC		5-oxoprolinase subunit PxpC	3	3	1	1	1090	362	5		932	932	932		dcf007684d8598380507220e605e8e2c_1433	7ef7127a3f11d26e5ed74c78ba404004_6734	Pseudomonase_1_02204
pxpA		5-oxoprolinase subunit PxpA	3	3	1	1	1091	362	4		734	734	734		dcf007684d8598380507220e605e8e2c_1435	7ef7127a3f11d26e5ed74c78ba404004_6732	Pseudomonase_1_02203
nei		endonuclease VIII	3	3	1	1	1092	362	3		791	791	791		dcf007684d8598380507220e605e8e2c_1437	7ef7127a3f11d26e5ed74c78ba404004_6730	Pseudomonase_1_02202
abrB		AbrB family transcriptional regulator	3	3	1	1	1093	362	2		1046	1046	1046		dcf007684d8598380507220e605e8e2c_1439	7ef7127a3f11d26e5ed74c78ba404004_6728	Pseudomonase_1_02201
WP_001305582.1		hypothetical protein	3	3	1	1	1098	489	1		107	107	107		dcf007684d8598380507220e605e8e2c_1445	7ef7127a3f11d26e5ed74c78ba404004_6722	Pseudomonase_1_02198
sdhC		succinate dehydrogenase cytochrome b556 subunit	3	3	1	1	1099	489	3		404	404	404		dcf007684d8598380507220e605e8e2c_1447	7ef7127a3f11d26e5ed74c78ba404004_6720	Pseudomonase_1_02197
sdhD		succinate dehydrogenase membrane anchor subunit	3	3	1	1	1100	489	2		347	347	347		dcf007684d8598380507220e605e8e2c_1449	7ef7127a3f11d26e5ed74c78ba404004_6718	Pseudomonase_1_02196
sucA		2-oxoglutarate dehydrogenase E1 component	3	3	1	1	1103	516	2		2801	2801	2801		dcf007684d8598380507220e605e8e2c_1455	7ef7127a3f11d26e5ed74c78ba404004_6712	Pseudomonase_1_02193
odhB		2-oxoglutarate dehydrogenase complex dihydrolipoyllysine-residue succinyltransferase	3	3	1	1	1104	516	1		1217	1217	1217		dcf007684d8598380507220e605e8e2c_1457	7ef7127a3f11d26e5ed74c78ba404004_6710	Pseudomonase_1_02192
WP_000538734.1		tetratricopeptide repeat protein	3	3	1	1	1107	438	5		1115	1115	1115		dcf007684d8598380507220e605e8e2c_1463	7ef7127a3f11d26e5ed74c78ba404004_6704	Pseudomonase_1_02189
cydA		cytochrome ubiquinol oxidase subunit I	3	3	1	1	1109	438	6		1568	1568	1568		dcf007684d8598380507220e605e8e2c_1465	7ef7127a3f11d26e5ed74c78ba404004_6702	Pseudomonase_1_02187
cydB		cytochrome d ubiquinol oxidase subunit II	3	3	1	1	1110	438	4		1139	1139	1139		dcf007684d8598380507220e605e8e2c_1467	7ef7127a3f11d26e5ed74c78ba404004_6700	Pseudomonase_1_02186
cydX		cytochrome bd-I oxidase subunit CydX	3	3	1	1	1111	438	3		113	113	113		dcf007684d8598380507220e605e8e2c_1469	7ef7127a3f11d26e5ed74c78ba404004_6698	Pseudomonase_1_02185
ybgE		cyd operon protein YbgE	3	3	1	1	1112	438	2		293	293	293		dcf007684d8598380507220e605e8e2c_1471	7ef7127a3f11d26e5ed74c78ba404004_6696	Pseudomonase_1_02184
tolR		colicin uptake protein TolR	3	3	1	1	1116	498	3		428	428	428		dcf007684d8598380507220e605e8e2c_1477	7ef7127a3f11d26e5ed74c78ba404004_6690	Pseudomonase_1_02181
tolA		cell envelope integrity protein TolA	3	3	1	1	1117	498	2		1265	1265	1265		dcf007684d8598380507220e605e8e2c_1479	7ef7127a3f11d26e5ed74c78ba404004_6688	Pseudomonase_1_02180
tolB		Tol-Pal system beta propeller repeat protein TolB	3	3	1	1	1118	498	1		1292	1292	1292		dcf007684d8598380507220e605e8e2c_1481	7ef7127a3f11d26e5ed74c78ba404004_6686	Pseudomonase_1_02179
cpoB		cell division protein CpoB	3	3	1	1	1138	311	1		791	791	791		dcf007684d8598380507220e605e8e2c_1485	7ef7127a3f11d26e5ed74c78ba404004_6682	Pseudomonase_1_02177
nadA		quinolinate synthase NadA	3	3	1	1	1139	311	2		1043	1043	1043		dcf007684d8598380507220e605e8e2c_1487	7ef7127a3f11d26e5ed74c78ba404004_6659	Pseudomonase_1_02169
pnuC		nicotinamide riboside transporter PnuC	3	3	1	1	1140	311	3		719	719	719		dcf007684d8598380507220e605e8e2c_1489	7ef7127a3f11d26e5ed74c78ba404004_6657	Pseudomonase_1_02168
zitB		CDF family zinc transporter ZitB	3	3	1	1	1141	311	4		941	941	941		dcf007684d8598380507220e605e8e2c_1491	7ef7127a3f11d26e5ed74c78ba404004_6655	Pseudomonase_1_02167
ybgS		YbgS-like family protein	3	3	1	1	1142	311	5		380	380	380		dcf007684d8598380507220e605e8e2c_1493	7ef7127a3f11d26e5ed74c78ba404004_6653	Pseudomonase_1_02166
aroG		3-deoxy-7-phosphoheptulonate synthase AroG	3	3	1	1	1143	311	6		1052	1052	1052		dcf007684d8598380507220e605e8e2c_1495	7ef7127a3f11d26e5ed74c78ba404004_6651	Pseudomonase_1_02165
gpmA		2,3-diphosphoglycerate-dependent phosphoglycerate mutase	3	3	1	1	1144	311	7		752	752	752		dcf007684d8598380507220e605e8e2c_1497	7ef7127a3f11d26e5ed74c78ba404004_6649	Pseudomonase_1_02164
galM		galactose-1-epimerase	3	3	1	1	1145	311	8		1040	1040	1040		dcf007684d8598380507220e605e8e2c_1499	7ef7127a3f11d26e5ed74c78ba404004_6647	Pseudomonase_1_02163
galK		galactokinase	3	3	1	1	1146	311	9		1148	1148	1148		dcf007684d8598380507220e605e8e2c_1501	7ef7127a3f11d26e5ed74c78ba404004_6645	Pseudomonase_1_02162
galT		galactose-1-phosphate uridylyltransferase	3	3	1	1	1147	311	10		1046	1046	1046		dcf007684d8598380507220e605e8e2c_1503	7ef7127a3f11d26e5ed74c78ba404004_6643	Pseudomonase_1_02161
group_6245	galE	UDP-glucose 4-epimerase GalE	3	3	1	1	1148	311	11		1016	1016	1016		dcf007684d8598380507220e605e8e2c_1505	7ef7127a3f11d26e5ed74c78ba404004_6641	Pseudomonase_1_02160
modF		molybdate ABC transporter ATP-binding protein ModF	3	3	1	1	1149	311	12		1472	1472	1472		dcf007684d8598380507220e605e8e2c_1507	7ef7127a3f11d26e5ed74c78ba404004_6639	Pseudomonase_1_02159
modE		molybdenum-dependent transcriptional regulator	3	3	1	1	1150	311	13		788	788	788		dcf007684d8598380507220e605e8e2c_1509	7ef7127a3f11d26e5ed74c78ba404004_6637	Pseudomonase_1_02158
acrZ		multidrug efflux pump accessory protein AcrZ	3	3	1	1	1151	311	14		149	149	149		dcf007684d8598380507220e605e8e2c_1511	7ef7127a3f11d26e5ed74c78ba404004_6635	Pseudomonase_1_02157
modA		molybdate ABC transporter substrate-binding protein	3	3	1	1	1152	311	15		773	773	773		dcf007684d8598380507220e605e8e2c_1513	7ef7127a3f11d26e5ed74c78ba404004_6633	Pseudomonase_1_02156
modB		molybdate ABC transporter permease subunit	3	3	1	1	1153	311	16		689	689	689		dcf007684d8598380507220e605e8e2c_1515	7ef7127a3f11d26e5ed74c78ba404004_6631	Pseudomonase_1_02155
modC		molybdenum ABC transporter ATP-binding protein ModC	3	3	1	1	1154	311	17		1058	1058	1058		dcf007684d8598380507220e605e8e2c_1517	7ef7127a3f11d26e5ed74c78ba404004_6629	Pseudomonase_1_02154
ybhA		bifunctional pyridoxal phosphate/fructose-1,6-bisphosphate phosphatase	3	3	1	1	1155	311	18		818	818	818		dcf007684d8598380507220e605e8e2c_1519	7ef7127a3f11d26e5ed74c78ba404004_6627	Pseudomonase_1_02153
pgl		6-phosphogluconolactonase	3	3	1	1	1156	311	19		995	995	995		dcf007684d8598380507220e605e8e2c_1521	7ef7127a3f11d26e5ed74c78ba404004_6625	Pseudomonase_1_02152
ybhD		LysR family transcriptional regulator	3	3	1	1	1157	311	20		953	953	953		dcf007684d8598380507220e605e8e2c_1523	7ef7127a3f11d26e5ed74c78ba404004_6623	Pseudomonase_1_02151
ybhH		4-oxalomesaconate tautomerase	3	3	1	1	1158	311	21		1052	1052	1052		dcf007684d8598380507220e605e8e2c_1525	7ef7127a3f11d26e5ed74c78ba404004_6621	Pseudomonase_1_02150
ybhI		anion permease	3	3	1	1	1159	311	22		1433	1433	1433		dcf007684d8598380507220e605e8e2c_1527	7ef7127a3f11d26e5ed74c78ba404004_6619	Pseudomonase_1_02149
ybhJ		hydratase	3	3	1	1	1160	311	23		2261	2261	2261		dcf007684d8598380507220e605e8e2c_1529	7ef7127a3f11d26e5ed74c78ba404004_6617	Pseudomonase_1_02148
ybhC		putative acyl-CoA thioester hydrolase	3	3	1	1	1161	311	24		1283	1283	1283		dcf007684d8598380507220e605e8e2c_1531	7ef7127a3f11d26e5ed74c78ba404004_6615	Pseudomonase_1_02147
ybhB		kinase inhibitor	3	3	1	1	1162	311	25		476	476	476		dcf007684d8598380507220e605e8e2c_1533	7ef7127a3f11d26e5ed74c78ba404004_6613	Pseudomonase_1_02146
WP_000817272.1		RNA-guided endonuclease TnpB family protein	3	3	1	1	1163	311	26		1130	1130	1130		dcf007684d8598380507220e605e8e2c_1535	7ef7127a3f11d26e5ed74c78ba404004_6611	Pseudomonase_1_02145
bioA		adenosylmethionine--8-amino-7-oxononanoate transaminase	3	3	1	1	1164	311	27		1289	1289	1289		dcf007684d8598380507220e605e8e2c_1537	7ef7127a3f11d26e5ed74c78ba404004_6609	Pseudomonase_1_02144
bioB		biotin synthase BioB	3	3	1	1	1165	311	28		1040	1040	1040		dcf007684d8598380507220e605e8e2c_1539	7ef7127a3f11d26e5ed74c78ba404004_6607	Pseudomonase_1_02143
bioF		8-amino-7-oxononanoate synthase	3	3	1	1	1166	311	29		1154	1154	1154		dcf007684d8598380507220e605e8e2c_1541	7ef7127a3f11d26e5ed74c78ba404004_6605	Pseudomonase_1_02142
bioC		malonyl-ACP O-methyltransferase BioC	3	3	1	1	1167	311	30		755	755	755		dcf007684d8598380507220e605e8e2c_1543	7ef7127a3f11d26e5ed74c78ba404004_6603	Pseudomonase_1_02141
bioD		dethiobiotin synthase	3	3	1	1	1168	311	31		677	677	677		dcf007684d8598380507220e605e8e2c_1545	7ef7127a3f11d26e5ed74c78ba404004_6601	Pseudomonase_1_02140
uvrB		excinuclease ABC subunit B	3	3	1	1	1169	311	32		2021	2021	2021		dcf007684d8598380507220e605e8e2c_1547	7ef7127a3f11d26e5ed74c78ba404004_6599	Pseudomonase_1_02139
yvcK		uridine diphosphate-N-acetylglucosamine-binding protein YvcK	3	3	1	1	1170	311	33		908	908	908		dcf007684d8598380507220e605e8e2c_1549	7ef7127a3f11d26e5ed74c78ba404004_6597	Pseudomonase_1_02138
moaA		GTP 3',8-cyclase MoaA	3	3	1	1	1171	311	34		989	989	989		dcf007684d8598380507220e605e8e2c_1552	7ef7127a3f11d26e5ed74c78ba404004_6594	Pseudomonase_1_02137
moaB		molybdenum cofactor biosynthesis protein B	3	3	1	1	1172	311	35		512	512	512		dcf007684d8598380507220e605e8e2c_1554	7ef7127a3f11d26e5ed74c78ba404004_6592	Pseudomonase_1_02136
moaC		cyclic pyranopterin monophosphate synthase MoaC	3	3	1	1	1173	311	36		485	485	485		dcf007684d8598380507220e605e8e2c_1556	7ef7127a3f11d26e5ed74c78ba404004_6590	Pseudomonase_1_02135
moaD		molybdopterin synthase sulfur carrier subunit	3	3	1	1	1174	311	37		245	245	245		dcf007684d8598380507220e605e8e2c_1558	7ef7127a3f11d26e5ed74c78ba404004_6588	Pseudomonase_1_02134
moaE		molybdopterin synthase catalytic subunit MoaE	3	3	1	1	1175	311	38		452	452	452		dcf007684d8598380507220e605e8e2c_1560	7ef7127a3f11d26e5ed74c78ba404004_6586	Pseudomonase_1_02133
ybhL		Bax inhibitor-1/YccA family protein	3	3	1	1	1176	311	74		704	704	704		dcf007684d8598380507220e605e8e2c_1562	7ef7127a3f11d26e5ed74c78ba404004_6584	Pseudomonase_1_02132
ybhM		Bax inhibitor-1/YccA family protein	3	3	1	1	1177	311	73		713	713	713		dcf007684d8598380507220e605e8e2c_1564	7ef7127a3f11d26e5ed74c78ba404004_6582	Pseudomonase_1_02131
ybhN		YbhN family protein	3	3	1	1	1178	311	72		956	956	956		dcf007684d8598380507220e605e8e2c_1566	7ef7127a3f11d26e5ed74c78ba404004_6580	Pseudomonase_1_02130
clsB		cardiolipin synthase ClsB	3	3	1	1	1179	311	71		1241	1241	1241		dcf007684d8598380507220e605e8e2c_1568	7ef7127a3f11d26e5ed74c78ba404004_6578	Pseudomonase_1_02129
ybhP		endonuclease/exonuclease/phosphatase family protein	3	3	1	1	1180	311	70		761	761	761		dcf007684d8598380507220e605e8e2c_1570	7ef7127a3f11d26e5ed74c78ba404004_6576	Pseudomonase_1_02128
ybhQ		YbhQ family protein	3	3	1	1	1181	311	69		410	410	410		dcf007684d8598380507220e605e8e2c_1572	7ef7127a3f11d26e5ed74c78ba404004_6574	Pseudomonase_1_02127
ybhR		ABC transporter permease	3	3	1	1	1182	311	68		1106	1106	1106		dcf007684d8598380507220e605e8e2c_1574	7ef7127a3f11d26e5ed74c78ba404004_6572	Pseudomonase_1_02126
ybhS		ABC transporter permease	3	3	1	1	1183	311	67		1133	1133	1133		dcf007684d8598380507220e605e8e2c_1576	7ef7127a3f11d26e5ed74c78ba404004_6570	Pseudomonase_1_02125
ybhF		ATP-binding cassette domain-containing protein	3	3	1	1	1184	311	66		1736	1736	1736		dcf007684d8598380507220e605e8e2c_1578	7ef7127a3f11d26e5ed74c78ba404004_6568	Pseudomonase_1_02124
hlyD		secretion protein HlyD	3	3	1	1	1185	311	65		995	995	995		dcf007684d8598380507220e605e8e2c_1580	7ef7127a3f11d26e5ed74c78ba404004_6566	Pseudomonase_1_02123
cecR		DNA-binding transcriptional regulator CecR	3	3	1	1	1186	311	64		671	671	671		dcf007684d8598380507220e605e8e2c_1582	7ef7127a3f11d26e5ed74c78ba404004_6564	Pseudomonase_1_02122
rhlE		ATP-dependent RNA helicase RhlE	3	3	1	1	1187	311	63		1361	1361	1361		dcf007684d8598380507220e605e8e2c_1584	7ef7127a3f11d26e5ed74c78ba404004_6562	Pseudomonase_1_02121
dinG		ATP-dependent DNA helicase DinG	3	3	1	1	1189	311	62		2150	2150	2150		dcf007684d8598380507220e605e8e2c_1588	7ef7127a3f11d26e5ed74c78ba404004_6558	Pseudomonase_1_02120
ybiB		DNA-binding protein YbiB	3	3	1	1	1190	311	61		962	962	962		dcf007684d8598380507220e605e8e2c_1590	7ef7127a3f11d26e5ed74c78ba404004_6556	Pseudomonase_1_02119
hcxB		hydroxycarboxylate dehydrogenase HcXB	3	3	1	1	1191	311	60		1085	1085	1085		dcf007684d8598380507220e605e8e2c_1592	7ef7127a3f11d26e5ed74c78ba404004_6554	Pseudomonase_1_02118
ybiJ		DUF1471 family protein YbiJ	3	3	1	1	1192	311	59		260	260	260		dcf007684d8598380507220e605e8e2c_1596	7ef7127a3f11d26e5ed74c78ba404004_6550	Pseudomonase_1_02117
ybiI		C4-type zinc finger protein YbiI	3	3	1	1	1193	311	58		266	266	266		dcf007684d8598380507220e605e8e2c_1598	7ef7127a3f11d26e5ed74c78ba404004_6548	Pseudomonase_1_02116
ybiX		PKHD-type hydroxylase YbiX	3	3	1	1	1194	311	57		674	677	676		dcf007684d8598380507220e605e8e2c_1600	7ef7127a3f11d26e5ed74c78ba404004_6546	Pseudomonase_1_02115
fiu		catecholate siderophore receptor Fiu	3	3	1	1	1195	311	56		2282	2282	2282		dcf007684d8598380507220e605e8e2c_1602	7ef7127a3f11d26e5ed74c78ba404004_6544	Pseudomonase_1_02114
mcbA		DUF1471 family periplasmic protein McbA	3	3	1	1	1196	311	55		260	260	260		dcf007684d8598380507220e605e8e2c_1604	7ef7127a3f11d26e5ed74c78ba404004_6542	Pseudomonase_1_02113
rlmF		23S rRNA (adenine(1618)-N(6))-methyltransferase RlmF	3	3	1	1	1197	311	54		926	926	926		dcf007684d8598380507220e605e8e2c_1606	7ef7127a3f11d26e5ed74c78ba404004_6540	Pseudomonase_1_02112
ybiO		mechanosensitive channel protein	3	3	1	1	1198	311	53		2225	2225	2225		dcf007684d8598380507220e605e8e2c_1608	7ef7127a3f11d26e5ed74c78ba404004_6538	Pseudomonase_1_02111
glnQ		glutamine ABC transporter ATP-binding protein GlnQ	3	3	1	1	1199	311	52		722	722	722		dcf007684d8598380507220e605e8e2c_1610	7ef7127a3f11d26e5ed74c78ba404004_6536	Pseudomonase_1_02110
glnP		glutamine ABC transporter permease GlnP	3	3	1	1	1200	311	51		659	659	659		dcf007684d8598380507220e605e8e2c_1612	7ef7127a3f11d26e5ed74c78ba404004_6534	Pseudomonase_1_02109
glnH		glutamine ABC transporter substrate-binding protein GlnH	3	3	1	1	1201	311	50		746	746	746		dcf007684d8598380507220e605e8e2c_1614	7ef7127a3f11d26e5ed74c78ba404004_6532	Pseudomonase_1_02108
WP_000044502.1		hypothetical protein	3	3	1	1	4047	321	9		608	848	704		dcf007684d8598380507220e605e8e2c_130	7ef7127a3f11d26e5ed74c78ba404004_8167	Pseudomonase_1_05296
dps		DNA starvation/stationary phase protection protein Dps	3	3	1	1	1202	311	49		503	503	503		dcf007684d8598380507220e605e8e2c_1616	7ef7127a3f11d26e5ed74c78ba404004_6530	Pseudomonase_1_02107
rhtA		threonine/homoserine exporter RhtA	3	3	1	1	1203	311	48		887	887	887		dcf007684d8598380507220e605e8e2c_1618	7ef7127a3f11d26e5ed74c78ba404004_6528	Pseudomonase_1_02106
ompX		outer membrane protein OmpX	3	3	1	1	1205	311	46		515	515	515		dcf007684d8598380507220e605e8e2c_1622	7ef7127a3f11d26e5ed74c78ba404004_6524	Pseudomonase_1_02105
opgE		phosphoethanolamine transferase	3	3	1	1	1206	311	45		1583	1583	1583		dcf007684d8598380507220e605e8e2c_1624	7ef7127a3f11d26e5ed74c78ba404004_6522	Pseudomonase_1_02104
mntS		manganase accumulation protein MntS	3	3	1	1	1207	311	44		128	128	128		dcf007684d8598380507220e605e8e2c_1626	7ef7127a3f11d26e5ed74c78ba404004_6520	Pseudomonase_1_02103
mntR		manganese-binding transcriptional regulator MntR	3	3	1	1	1208	311	43		467	467	467		dcf007684d8598380507220e605e8e2c_1628	7ef7127a3f11d26e5ed74c78ba404004_6518	Pseudomonase_1_02102
ybiR		anion transporter	3	3	1	1	1209	311	42		1118	1118	1118		dcf007684d8598380507220e605e8e2c_1630	7ef7127a3f11d26e5ed74c78ba404004_6516	Pseudomonase_1_02101
ldtB		L,D-transpeptidase	3	3	1	1	1210	311	41		920	920	920		dcf007684d8598380507220e605e8e2c_1632	7ef7127a3f11d26e5ed74c78ba404004_6514	Pseudomonase_1_02100
ybiV		sugar-phosphatase YbiV	3	3	1	1	1336	319	4		815	815	815		dcf007684d8598380507220e605e8e2c_1636	7ef7127a3f11d26e5ed74c78ba404004_6510	Pseudomonase_1_02098
ybiW		glycyl radical protein	3	3	1	1	1335	319	5		2432	2432	2432		dcf007684d8598380507220e605e8e2c_1638	7ef7127a3f11d26e5ed74c78ba404004_6508	Pseudomonase_1_02097
ybiY		glycyl-radical enzyme activating protein	3	3	1	1	1334	319	6		899	899	899		dcf007684d8598380507220e605e8e2c_1640	7ef7127a3f11d26e5ed74c78ba404004_6506	Pseudomonase_1_02096
fsa		fructose-6-phosphate aldolase	3	3	1	1	1333	319	7		662	662	662		dcf007684d8598380507220e605e8e2c_1642	7ef7127a3f11d26e5ed74c78ba404004_6504	Pseudomonase_1_02095
moeB		molybdopterin-synthase adenylyltransferase MoeB	3	3	1	1	1332	319	8		749	749	749		dcf007684d8598380507220e605e8e2c_1644	7ef7127a3f11d26e5ed74c78ba404004_6502	Pseudomonase_1_02094
moeA		molybdopterin molybdotransferase MoeA	3	3	1	1	1331	319	9		1235	1235	1235		dcf007684d8598380507220e605e8e2c_1646	7ef7127a3f11d26e5ed74c78ba404004_6500	Pseudomonase_1_02093
iaaA		beta-aspartyl-peptidase	3	3	1	1	1330	319	10		965	965	965		dcf007684d8598380507220e605e8e2c_1648	7ef7127a3f11d26e5ed74c78ba404004_6498	Pseudomonase_1_02092
gsiA		glutathione ABC transporter ATP-binding protein GsiA	3	3	1	1	1329	319	11		1871	1871	1871		dcf007684d8598380507220e605e8e2c_1650	7ef7127a3f11d26e5ed74c78ba404004_6496	Pseudomonase_1_02091
gsiB		glutathione ABC transporter substrate-binding protein GsiB	3	3	1	1	1328	319	12		1538	1538	1538		dcf007684d8598380507220e605e8e2c_1652	7ef7127a3f11d26e5ed74c78ba404004_6494	Pseudomonase_1_02090
gsiC		glutathione ABC transporter permease GsiC	3	3	1	1	1327	319	13		920	920	920		dcf007684d8598380507220e605e8e2c_1654	7ef7127a3f11d26e5ed74c78ba404004_6492	Pseudomonase_1_02089
gsiD		glutathione ABC transporter permease GsiD	3	3	1	1	1326	319	14		911	911	911		dcf007684d8598380507220e605e8e2c_1656	7ef7127a3f11d26e5ed74c78ba404004_6490	Pseudomonase_1_02088
pdeI		EAL domain-containing protein	3	3	1	1	1325	319	15		2348	2348	2348		dcf007684d8598380507220e605e8e2c_1658	7ef7127a3f11d26e5ed74c78ba404004_6488	Pseudomonase_1_02087
dgcI		GGDEF domain-containing protein	3	3	1	1	1324	319	16		1328	1328	1328		dcf007684d8598380507220e605e8e2c_1660	7ef7127a3f11d26e5ed74c78ba404004_6486	Pseudomonase_1_02086
rimO		30S ribosomal protein S12 methylthiotransferase RimO	3	3	1	1	1323	319	17		1325	1325	1325		dcf007684d8598380507220e605e8e2c_1662	7ef7127a3f11d26e5ed74c78ba404004_6484	Pseudomonase_1_02085
bssR		biofilm formation regulator BssR	3	3	1	1	1322	319	18		383	383	383		dcf007684d8598380507220e605e8e2c_1664	7ef7127a3f11d26e5ed74c78ba404004_6482	Pseudomonase_1_02084
yliI		aldose sugar dehydrogenase YliI	3	3	1	1	1321	319	19		1115	1115	1115		dcf007684d8598380507220e605e8e2c_1666	7ef7127a3f11d26e5ed74c78ba404004_6480	Pseudomonase_1_02083
gstB		glutathione S-transferase GstB	3	3	1	1	1320	319	20		626	626	626		dcf007684d8598380507220e605e8e2c_1668	7ef7127a3f11d26e5ed74c78ba404004_6478	Pseudomonase_1_02082
dacC		serine-type D-Ala-D-Ala carboxypeptidase	3	3	1	1	1319	319	21		1202	1202	1202		dcf007684d8598380507220e605e8e2c_1670	7ef7127a3f11d26e5ed74c78ba404004_6476	Pseudomonase_1_02081
deoR		DNA-binding transcriptional repressor DeoR	3	3	1	1	1318	319	22		758	758	758		dcf007684d8598380507220e605e8e2c_1672	7ef7127a3f11d26e5ed74c78ba404004_6474	Pseudomonase_1_02080
ybjG		undecaprenyl-diphosphate phosphatase	3	3	1	1	1317	319	23		596	596	596		dcf007684d8598380507220e605e8e2c_1674	7ef7127a3f11d26e5ed74c78ba404004_6472	Pseudomonase_1_02079
mdfA		Multidrug transporter MdfA	3	3	1	1	1316	319	24		1232	1232	1232		dcf007684d8598380507220e605e8e2c_1676	7ef7127a3f11d26e5ed74c78ba404004_6470	Pseudomonase_1_02078
ybjI		5-amino-6-(5-phospho-D-ribitylamino)uracil phosphatase	3	3	1	1	1314	319	26		815	815	815		dcf007684d8598380507220e605e8e2c_1680	7ef7127a3f11d26e5ed74c78ba404004_6466	Pseudomonase_1_02076
ybjJ		MFS transporter	3	3	1	1	1313	319	27		1208	1208	1208		dcf007684d8598380507220e605e8e2c_1682	7ef7127a3f11d26e5ed74c78ba404004_6464	Pseudomonase_1_02075
rcdA		DNA-binding transcriptional regulator RcdA	3	3	1	1	1312	319	28		536	536	536		dcf007684d8598380507220e605e8e2c_1684	7ef7127a3f11d26e5ed74c78ba404004_6462	Pseudomonase_1_02074
ybjL		aspartate:alanine antiporter	3	3	1	1	1311	319	29		1685	1685	1685		dcf007684d8598380507220e605e8e2c_1686	7ef7127a3f11d26e5ed74c78ba404004_6460	Pseudomonase_1_02073
ybjM		inner membrane protein YbjM	3	3	1	1	1310	319	30		377	377	377		dcf007684d8598380507220e605e8e2c_1688	7ef7127a3f11d26e5ed74c78ba404004_6458	Pseudomonase_1_02072
grxA		glutaredoxin 1	3	3	1	1	1309	319	31		257	257	257		dcf007684d8598380507220e605e8e2c_1690	7ef7127a3f11d26e5ed74c78ba404004_6456	Pseudomonase_1_02071
ybjC		DUF1418 family protein	3	3	1	1	1308	319	32		287	287	287		dcf007684d8598380507220e605e8e2c_1692	7ef7127a3f11d26e5ed74c78ba404004_6454	Pseudomonase_1_02070
nfsA		nitroreductase NfsA	3	3	1	1	1307	319	33		722	722	722		dcf007684d8598380507220e605e8e2c_1694	7ef7127a3f11d26e5ed74c78ba404004_6452	Pseudomonase_1_02069
rimK		30S ribosomal protein S6--L-glutamate ligase	3	3	1	1	1306	319	34		902	902	902		dcf007684d8598380507220e605e8e2c_1696	7ef7127a3f11d26e5ed74c78ba404004_6450	Pseudomonase_1_02068
ybjN		YbjN domain-containing protein	3	3	1	1	1305	319	35		476	476	476		dcf007684d8598380507220e605e8e2c_1698	7ef7127a3f11d26e5ed74c78ba404004_6448	Pseudomonase_1_02067
potF		spermidine/putrescine ABC transporter substrate-binding protein PotF	3	3	1	1	1304	319	36		1112	1112	1112		dcf007684d8598380507220e605e8e2c_1700	7ef7127a3f11d26e5ed74c78ba404004_6446	Pseudomonase_1_02066
potG		putrescine ABC transporter ATP-binding subunit PotG	3	3	1	1	1303	319	37		1133	1133	1133		dcf007684d8598380507220e605e8e2c_1702	7ef7127a3f11d26e5ed74c78ba404004_6444	Pseudomonase_1_02065
potH		putrescine ABC transporter permease PotH	3	3	1	1	1302	319	38		944	944	944		dcf007684d8598380507220e605e8e2c_1704	7ef7127a3f11d26e5ed74c78ba404004_6442	Pseudomonase_1_02064
potI		putrescine ABC transporter permease PotI	3	3	1	1	1301	319	39		845	845	845		dcf007684d8598380507220e605e8e2c_1706	7ef7127a3f11d26e5ed74c78ba404004_6440	Pseudomonase_1_02063
ybjO		YbjO family protein	3	3	1	1	1300	319	40		488	488	488		dcf007684d8598380507220e605e8e2c_1708	7ef7127a3f11d26e5ed74c78ba404004_6438	Pseudomonase_1_02062
rlmC		23S rRNA (uracil(747)-C(5))-methyltransferase RlmC	3	3	1	1	1299	319	41		1127	1127	1127		dcf007684d8598380507220e605e8e2c_1710	7ef7127a3f11d26e5ed74c78ba404004_6436	Pseudomonase_1_02061
artJ		ABC transporter substrate-binding protein ArtJ	3	3	1	1	1298	319	42		731	731	731		dcf007684d8598380507220e605e8e2c_1712	7ef7127a3f11d26e5ed74c78ba404004_6434	Pseudomonase_1_02060
artM		arginine ABC transporter permease ArtM	3	3	1	1	1297	319	3		668	668	668		dcf007684d8598380507220e605e8e2c_1714	7ef7127a3f11d26e5ed74c78ba404004_6432	Pseudomonase_1_02059
artQ		arginine ABC transporter permease ArtQ	3	3	1	1	1296	319	2		716	716	716		dcf007684d8598380507220e605e8e2c_1716	7ef7127a3f11d26e5ed74c78ba404004_6430	Pseudomonase_1_02058
group_6349	artJ	arginine ABC transporter substrate-binding protein	3	3	1	1	7445	319	1		731	731	731		dcf007684d8598380507220e605e8e2c_1718	7ef7127a3f11d26e5ed74c78ba404004_6428	Pseudomonase_1_02057
ybjQ		heavy metal-binding domain-containing protein	3	3	1	1	7443	331	2		323	323	323		dcf007684d8598380507220e605e8e2c_1724	7ef7127a3f11d26e5ed74c78ba404004_6422	Pseudomonase_1_02053
amiD		N-acetylmuramoyl-L-alanine amidase AmiD	3	3	1	1	7442	331	3		830	830	830		dcf007684d8598380507220e605e8e2c_1726	7ef7127a3f11d26e5ed74c78ba404004_6420	Pseudomonase_1_02052
ybjT		SDR family oxidoreductase	3	3	1	1	7440	331	5		1430	1430	1430		dcf007684d8598380507220e605e8e2c_1730	7ef7127a3f11d26e5ed74c78ba404004_6416	Pseudomonase_1_02050
ltaE		low-specificity L-threonine aldolase	3	3	1	1	7439	331	6		1001	1001	1001		dcf007684d8598380507220e605e8e2c_1732	7ef7127a3f11d26e5ed74c78ba404004_6414	Pseudomonase_1_02049
poxB		ubiquinone-dependent pyruvate dehydrogenase	3	3	1	1	7438	331	7		1718	1718	1718		dcf007684d8598380507220e605e8e2c_1734	7ef7127a3f11d26e5ed74c78ba404004_6412	Pseudomonase_1_02048
hcr		NADH oxidoreductase	3	3	1	1	7437	331	8		968	968	968		dcf007684d8598380507220e605e8e2c_1736	7ef7127a3f11d26e5ed74c78ba404004_6410	Pseudomonase_1_02047
group_6356	hcp	hydroxylamine reductase	3	3	1	1	7436	331	9		1652	1652	1652		dcf007684d8598380507220e605e8e2c_1738	7ef7127a3f11d26e5ed74c78ba404004_6408	Pseudomonase_1_02046
lysO		Lysine exporter LysO	3	3	1	1	7435	331	10		899	899	899		dcf007684d8598380507220e605e8e2c_1740	7ef7127a3f11d26e5ed74c78ba404004_6406	Pseudomonase_1_02045
aqpZ		aquaporin Z	3	3	1	1	7434	331	11		695	695	695		dcf007684d8598380507220e605e8e2c_1742	7ef7127a3f11d26e5ed74c78ba404004_6404	Pseudomonase_1_02044
ybjD		ATP-dependent endonuclease	3	3	1	1	7433	331	12		1658	1658	1658		dcf007684d8598380507220e605e8e2c_1744	7ef7127a3f11d26e5ed74c78ba404004_6402	Pseudomonase_1_02043
macA		macrolide transporter subunit MacA	3	3	1	1	7431	331	14		1115	1115	1115		dcf007684d8598380507220e605e8e2c_1748	7ef7127a3f11d26e5ed74c78ba404004_6398	Pseudomonase_1_02041
macB		macrolide ABC transporter ATP-binding protein/permease MacB	3	3	1	1	7430	331	15		1946	1946	1946		dcf007684d8598380507220e605e8e2c_1750	7ef7127a3f11d26e5ed74c78ba404004_6396	Pseudomonase_1_02040
cspD		cold shock-like protein CspD	3	3	1	1	7429	331	16		224	224	224		dcf007684d8598380507220e605e8e2c_1752	7ef7127a3f11d26e5ed74c78ba404004_6394	Pseudomonase_1_02039
WP_000085201.1		site-specific integrase	3	3	1	1	7428	331	17		1238	1238	1238		dcf007684d8598380507220e605e8e2c_1756	7ef7127a3f11d26e5ed74c78ba404004_6390	Pseudomonase_1_02038
WP_001206970.1		AlpA family phage regulatory protein	3	3	1	1	7427	331	18		209	209	209		dcf007684d8598380507220e605e8e2c_1758	7ef7127a3f11d26e5ed74c78ba404004_6388	Pseudomonase_1_02037
WP_021527564.1		host cell division inhibitor Icd-like protein	3	3	1	1	7426	331	20		197	197	197		dcf007684d8598380507220e605e8e2c_1762	7ef7127a3f11d26e5ed74c78ba404004_6384	Pseudomonase_1_02036
WP_000543626.1		hypothetical protein	3	3	1	1	7424	331	33		227	227	227		dcf007684d8598380507220e605e8e2c_1766	7ef7127a3f11d26e5ed74c78ba404004_6380	Pseudomonase_1_02034
WP_000791981.1		DUF4222 domain-containing protein	3	3	1	1	7423	331	32		287	287	287		dcf007684d8598380507220e605e8e2c_1768	7ef7127a3f11d26e5ed74c78ba404004_6378	Pseudomonase_1_02033
WP_000761778.1		DUF5906 domain-containing protein	3	3	1	1	7422	331	31		1754	1754	1754		dcf007684d8598380507220e605e8e2c_1770	7ef7127a3f11d26e5ed74c78ba404004_6376	Pseudomonase_1_02032
WP_000557485.1		hypothetical protein	3	3	1	1	7421	331	30		257	257	257		dcf007684d8598380507220e605e8e2c_1772	7ef7127a3f11d26e5ed74c78ba404004_6374	Pseudomonase_1_02031
WP_000126651.1		single-stranded DNA-binding protein	3	3	1	1	7420	331	29		422	422	422		dcf007684d8598380507220e605e8e2c_1774	7ef7127a3f11d26e5ed74c78ba404004_6372	Pseudomonase_1_02030
WP_001082952.1		Clp protease ClpP	3	3	1	1	7418	331	27		1913	1913	1913		dcf007684d8598380507220e605e8e2c_1778	7ef7127a3f11d26e5ed74c78ba404004_6368	Pseudomonase_1_02028
WP_000373413.1		DUF1441 family protein	3	3	1	1	7417	331	26		485	485	485		dcf007684d8598380507220e605e8e2c_1780	7ef7127a3f11d26e5ed74c78ba404004_6366	Pseudomonase_1_02027
WP_000140261.1		hypothetical protein	3	3	1	1	7416	331	25		281	281	281		dcf007684d8598380507220e605e8e2c_1782	7ef7127a3f11d26e5ed74c78ba404004_6364	Pseudomonase_1_02026
clpS		ATP-dependent Clp protease adapter ClpS	3	3	1	1	7449	331	23		320	320	320		dcf007684d8598380507220e605e8e2c_1786	7ef7127a3f11d26e5ed74c78ba404004_6360	Pseudomonase_1_02025
aat		leucyl/phenylalanyl-tRNA--protein transferase	3	3	1	1	5510	497	2		704	704	704		dcf007684d8598380507220e605e8e2c_1795	7ef7127a3f11d26e5ed74c78ba404004_6140	Pseudomonase_1_02021
cydC		cysteine/glutathione ABC transporter ATP-binding protein/permease CydC	3	3	1	1	5968	497	3		1721	1721	1721		dcf007684d8598380507220e605e8e2c_1797	7ef7127a3f11d26e5ed74c78ba404004_6138	Pseudomonase_1_02020
cydD		cysteine/glutathione ABC transporter permease/ATP-binding protein CydD	3	3	1	1	5969	497	1		1766	1766	1766		dcf007684d8598380507220e605e8e2c_1799	7ef7127a3f11d26e5ed74c78ba404004_6136	Pseudomonase_1_02019
lolA		outer membrane lipoprotein chaperone LolA	3	3	1	1	5965	553	1		611	611	611		dcf007684d8598380507220e605e8e2c_1807	7ef7127a3f11d26e5ed74c78ba404004_6128	Pseudomonase_1_02015
serS		serine--tRNA ligase	3	3	1	1	5511	439	1		1292	1292	1292		dcf007684d8598380507220e605e8e2c_1811	7ef7127a3f11d26e5ed74c78ba404004_6124	Pseudomonase_1_02013
dmsA		dimethylsulfoxide reductase subunit A	3	3	1	1	5512	439	2		2444	2444	2444		dcf007684d8598380507220e605e8e2c_1813	7ef7127a3f11d26e5ed74c78ba404004_6122	Pseudomonase_1_02012
group_6385	dmsB	dimethylsulfoxide reductase subunit B	3	3	1	1	5513	439	3		617	617	617		dcf007684d8598380507220e605e8e2c_1815	7ef7127a3f11d26e5ed74c78ba404004_6120	Pseudomonase_1_02011
dmsC		dimethyl sulfoxide reductase anchor subunit DmsC	3	3	1	1	5514	439	4		863	863	863		dcf007684d8598380507220e605e8e2c_1817	7ef7127a3f11d26e5ed74c78ba404004_6118	Pseudomonase_1_02010
ycaC		hydrolase	3	3	1	1	5515	439	6		626	626	626		dcf007684d8598380507220e605e8e2c_1819	7ef7127a3f11d26e5ed74c78ba404004_6116	Pseudomonase_1_02009
ycaD		MFS transporter	3	3	1	1	5516	439	5		1148	1148	1148		dcf007684d8598380507220e605e8e2c_1821	7ef7127a3f11d26e5ed74c78ba404004_6114	Pseudomonase_1_02008
ycaO		30S ribosomal protein S12 methylthiotransferase accessory protein YcaO	3	3	1	1	5915	429	7		1760	1760	1760		dcf007684d8598380507220e605e8e2c_1829	7ef7127a3f11d26e5ed74c78ba404004_6106	Pseudomonase_1_02004
ycaP		DUF421 domain-containing protein	3	3	1	1	5914	429	6		692	692	692		dcf007684d8598380507220e605e8e2c_1831	7ef7127a3f11d26e5ed74c78ba404004_6104	Pseudomonase_1_02003
serC		3-phosphoserine/phosphohydroxythreonine transaminase	3	3	1	1	5913	429	5		1088	1088	1088		dcf007684d8598380507220e605e8e2c_1833	7ef7127a3f11d26e5ed74c78ba404004_6102	Pseudomonase_1_02002
aroA		3-phosphoshikimate 1-carboxyvinyltransferase	3	3	1	1	5912	429	4		1283	1283	1283		dcf007684d8598380507220e605e8e2c_1835	7ef7127a3f11d26e5ed74c78ba404004_6100	Pseudomonase_1_02001
ycaL		metallopeptidase YcaL	3	3	1	1	5911	429	3		764	764	764		dcf007684d8598380507220e605e8e2c_1837	7ef7127a3f11d26e5ed74c78ba404004_6098	Pseudomonase_1_02000
cmk		(d)CMP kinase	3	3	1	1	5910	429	2		683	683	683		dcf007684d8598380507220e605e8e2c_1839	7ef7127a3f11d26e5ed74c78ba404004_6096	Pseudomonase_1_01999
ycaI		ComEC family protein	3	3	1	1	5535	369	1		2264	2264	2264		dcf007684d8598380507220e605e8e2c_1845	7ef7127a3f11d26e5ed74c78ba404004_6090	Pseudomonase_1_01996
msbA		lipid A ABC transporter ATP-binding protein/permease MsbA	3	3	1	1	5534	369	2		1748	1748	1748		dcf007684d8598380507220e605e8e2c_1847	7ef7127a3f11d26e5ed74c78ba404004_6088	Pseudomonase_1_01995
lpxK		tetraacyldisaccharide 4'-kinase	3	3	1	1	5533	369	3		986	986	986		dcf007684d8598380507220e605e8e2c_1849	7ef7127a3f11d26e5ed74c78ba404004_6086	Pseudomonase_1_01994
ycaQ		winged helix-turn-helix domain-containing protein	3	3	1	1	5532	369	4		1232	1232	1232		dcf007684d8598380507220e605e8e2c_1851	7ef7127a3f11d26e5ed74c78ba404004_6084	Pseudomonase_1_01993
ycaR		protein YcaR	3	3	1	1	5531	369	5		182	182	182		dcf007684d8598380507220e605e8e2c_1853	7ef7127a3f11d26e5ed74c78ba404004_6082	Pseudomonase_1_01992
WP_000528851.1		hypothetical protein	3	4	1.34	1	5272				572	1439	1079		dcf007684d8598380507220e605e8e2c_482	7ef7127a3f11d26e5ed74c78ba404004_7797	Pseudomonase_1_08877 Pseudomonase_1_08878
group_6400	kdsB	3-deoxy-manno-octulosonate cytidylyltransferase	3	3	1	1	5530	369	6		746	746	746		dcf007684d8598380507220e605e8e2c_1855	7ef7127a3f11d26e5ed74c78ba404004_6080	Pseudomonase_1_01991
ycbJ		YcbJ family phosphotransferase	3	3	1	1	5529	369	17		893	893	893		dcf007684d8598380507220e605e8e2c_1857	7ef7127a3f11d26e5ed74c78ba404004_6078	Pseudomonase_1_01990
elyC		envelope biogenesis factor ElyC	3	3	1	1	5528	369	16		779	779	779		dcf007684d8598380507220e605e8e2c_1859	7ef7127a3f11d26e5ed74c78ba404004_6076	Pseudomonase_1_01989
cmoM		tRNA uridine 5-oxyacetic acid(34) methyltransferase CmoM	3	3	1	1	5527	369	15		785	785	785		dcf007684d8598380507220e605e8e2c_1861	7ef7127a3f11d26e5ed74c78ba404004_6074	Pseudomonase_1_01988
mukF		chromosome partition protein MukF	3	3	1	1	5526	369	14		1322	1322	1322		dcf007684d8598380507220e605e8e2c_1863	7ef7127a3f11d26e5ed74c78ba404004_6072	Pseudomonase_1_01987
mukE		chromosome partition protein MukE	3	3	1	1	5525	369	13		704	704	704		dcf007684d8598380507220e605e8e2c_1865	7ef7127a3f11d26e5ed74c78ba404004_6070	Pseudomonase_1_01986
mukB		chromosome partition protein MukB	3	3	1	1	5524	369	12		4460	4460	4460		dcf007684d8598380507220e605e8e2c_1867	7ef7127a3f11d26e5ed74c78ba404004_6068	Pseudomonase_1_01985
ldtD		L,D-transpeptidase	3	3	1	1	5523	369	11		1847	1847	1847		dcf007684d8598380507220e605e8e2c_1869	7ef7127a3f11d26e5ed74c78ba404004_6066	Pseudomonase_1_01984
mepK		YcbK family protein	3	3	1	1	5522	369	10		548	548	548		dcf007684d8598380507220e605e8e2c_1871	7ef7127a3f11d26e5ed74c78ba404004_6064	Pseudomonase_1_01983
gloC		Hydroxyacylglutathione hydrolase GloC	3	3	1	1	5521	369	9		647	647	647		dcf007684d8598380507220e605e8e2c_1873	7ef7127a3f11d26e5ed74c78ba404004_6062	Pseudomonase_1_01982
aspC		aspartate transaminase	3	3	1	1	5538	369	8		1190	1190	1190		dcf007684d8598380507220e605e8e2c_1875	7ef7127a3f11d26e5ed74c78ba404004_6060	Pseudomonase_1_01981
ompF		porin OmpF	3	3	1	1	5539	369	7		1088	1088	1088		dcf007684d8598380507220e605e8e2c_1877	7ef7127a3f11d26e5ed74c78ba404004_6058	Pseudomonase_1_01980
pncB		nicotinate phosphoribosyltransferase	3	3	1	1	5889	379	7		1202	1202	1202		dcf007684d8598380507220e605e8e2c_1881	7ef7127a3f11d26e5ed74c78ba404004_6054	Pseudomonase_1_01978
pepN		aminopeptidase N	3	3	1	1	5888	379	8		2612	2612	2612		dcf007684d8598380507220e605e8e2c_1883	7ef7127a3f11d26e5ed74c78ba404004_6052	Pseudomonase_1_01977
ssuB		aliphatic sulfonates ABC transporter ATP-binding protein	3	3	1	1	5887	379	9		767	767	767		dcf007684d8598380507220e605e8e2c_1885	7ef7127a3f11d26e5ed74c78ba404004_6050	Pseudomonase_1_01976
ssuC		aliphatic sulfonate ABC transporter permease SsuC	3	3	1	1	5886	379	10		791	791	791		dcf007684d8598380507220e605e8e2c_1887	7ef7127a3f11d26e5ed74c78ba404004_6048	Pseudomonase_1_01975
ssuD		FMNH2-dependent alkanesulfonate monooxygenase	3	3	1	1	5885	379	11		1145	1145	1145		dcf007684d8598380507220e605e8e2c_1889	7ef7127a3f11d26e5ed74c78ba404004_6046	Pseudomonase_1_01974
ssuA		aliphatic sulfonate ABC transporter substrate-binding protein SsuA	3	3	1	1	5884	379	12		959	959	959		dcf007684d8598380507220e605e8e2c_1891	7ef7127a3f11d26e5ed74c78ba404004_6044	Pseudomonase_1_01973
ssuE		NADPH-dependent FMN reductase	3	3	1	1	5883	379	13		575	575	575		dcf007684d8598380507220e605e8e2c_1893	7ef7127a3f11d26e5ed74c78ba404004_6042	Pseudomonase_1_01972
pyrD		quinone-dependent dihydroorotate dehydrogenase	3	3	1	1	5882	379	14		1010	1010	1010		dcf007684d8598380507220e605e8e2c_1895	7ef7127a3f11d26e5ed74c78ba404004_6040	Pseudomonase_1_01971
zapC		cell division protein ZapC	3	3	1	1	5881	379	15		542	542	542		dcf007684d8598380507220e605e8e2c_1897	7ef7127a3f11d26e5ed74c78ba404004_6038	Pseudomonase_1_01970
ycbX		6-N-hydroxylaminopurine resistance protein YcbX	3	3	1	1	5880	379	16		1109	1109	1109		dcf007684d8598380507220e605e8e2c_1899	7ef7127a3f11d26e5ed74c78ba404004_6036	Pseudomonase_1_01969
rlmKL		bifunctional 23S rRNA (guanine(2069)-N(7))-methyltransferase RlmK/23S rRNA (guanine(2445)-N(2))-methyltransferase RlmL	3	3	1	1	5879	379	6		2108	2108	2108		dcf007684d8598380507220e605e8e2c_1901	7ef7127a3f11d26e5ed74c78ba404004_6034	Pseudomonase_1_01968
uup		ABC transporter ATP-binding protein	3	3	1	1	5878	379	5		1907	1907	1907		dcf007684d8598380507220e605e8e2c_1903	7ef7127a3f11d26e5ed74c78ba404004_6032	Pseudomonase_1_01967
pqiA		membrane integrity-associated transporter subunit PqiA	3	3	1	1	5877	379	4		1253	1253	1253		dcf007684d8598380507220e605e8e2c_1905	7ef7127a3f11d26e5ed74c78ba404004_6030	Pseudomonase_1_01966
pqiB		intermembrane transport protein PqiB	3	3	1	1	5876	379	3		1640	1640	1640		dcf007684d8598380507220e605e8e2c_1907	7ef7127a3f11d26e5ed74c78ba404004_6028	Pseudomonase_1_01965
pqiC		membrane integrity-associated transporter subunit PqiC	3	3	1	1	5875	379	2		563	563	563		dcf007684d8598380507220e605e8e2c_1909	7ef7127a3f11d26e5ed74c78ba404004_6026	Pseudomonase_1_01964
rmf		ribosome modulation factor	3	3	1	1	5540	379	1		167	167	167		dcf007684d8598380507220e605e8e2c_1911	7ef7127a3f11d26e5ed74c78ba404004_6024	Pseudomonase_1_01963
ycbZ		Lon protease family protein	3	3	1	1	5833	409	5		1760	1760	1760		dcf007684d8598380507220e605e8e2c_1915	7ef7127a3f11d26e5ed74c78ba404004_6020	Pseudomonase_1_01961
matP		macrodomain Ter protein MatP	3	3	1	1	5834	409	6		452	452	452		dcf007684d8598380507220e605e8e2c_1917	7ef7127a3f11d26e5ed74c78ba404004_6018	Pseudomonase_1_01960
yobF		YobF family protein	3	3	1	1	10388	18	32		71	143	119	1c58dc8b1c0b0cb7c89dc05980566ffe_10541	dcf007684d8598380507220e605e8e2c_3537	7ef7127a3f11d26e5ed74c78ba404004_4300
ompA		porin OmpA	3	3	1	1	5835	409	7		1040	1040	1040		dcf007684d8598380507220e605e8e2c_1919	7ef7127a3f11d26e5ed74c78ba404004_6016	Pseudomonase_1_01959
sulA		cell division inhibitor SulA	3	3	1	1	5836	409	8		509	509	509		dcf007684d8598380507220e605e8e2c_1921	7ef7127a3f11d26e5ed74c78ba404004_6014	Pseudomonase_1_01958
sxy		CRP-S regulon transcriptional coactivator Sxy	3	3	1	1	5837	409	9		629	629	629		dcf007684d8598380507220e605e8e2c_1923	7ef7127a3f11d26e5ed74c78ba404004_6012	Pseudomonase_1_01957
yccS		YccS family putative transporter	3	3	1	1	5838	409	10		2162	2162	2162		dcf007684d8598380507220e605e8e2c_1925	7ef7127a3f11d26e5ed74c78ba404004_6010	Pseudomonase_1_01956
yccF		YccF domain-containing protein	3	3	1	1	5839	409	4		446	446	446		dcf007684d8598380507220e605e8e2c_1927	7ef7127a3f11d26e5ed74c78ba404004_6008	Pseudomonase_1_01955
mgsA		methylglyoxal synthase	3	3	1	1	5841	409	2		458	458	458		dcf007684d8598380507220e605e8e2c_1931	7ef7127a3f11d26e5ed74c78ba404004_6004	Pseudomonase_1_01953
yccT		DUF2057 family protein	3	3	1	1	5842	409	1		662	662	662		dcf007684d8598380507220e605e8e2c_1933	7ef7127a3f11d26e5ed74c78ba404004_6002	Pseudomonase_1_01952
hspQ		heat shock protein HspQ	3	3	1	1	5634	322	20		317	317	317		dcf007684d8598380507220e605e8e2c_1937	7ef7127a3f11d26e5ed74c78ba404004_5998	Pseudomonase_1_01950
rlmI		23S rRNA (cytosine(1962)-C(5))-methyltransferase RlmI	3	3	1	1	5635	322	21		1175	1190	1185		dcf007684d8598380507220e605e8e2c_1939	7ef7127a3f11d26e5ed74c78ba404004_5996	Pseudomonase_1_01949
yccX		acylphosphatase	3	3	1	1	5636	322	22		278	278	278		dcf007684d8598380507220e605e8e2c_1941	7ef7127a3f11d26e5ed74c78ba404004_5994	Pseudomonase_1_01948
tusE		sulfurtransferase TusE	3	3	1	1	5637	322	23		329	329	329		dcf007684d8598380507220e605e8e2c_1943	7ef7127a3f11d26e5ed74c78ba404004_5992	Pseudomonase_1_01947
yccA		FtsH protease modulator YccA	3	3	1	1	5638	322	24		659	659	659		dcf007684d8598380507220e605e8e2c_1945	7ef7127a3f11d26e5ed74c78ba404004_5990	Pseudomonase_1_01946
hyaA		hydrogenase 1 small subunit	3	3	1	1	5639	322	25		1118	1118	1118		dcf007684d8598380507220e605e8e2c_1950	7ef7127a3f11d26e5ed74c78ba404004_5985	Pseudomonase_1_01944
hyaB		Ni/Fe-hydrogenase large subunit	3	3	1	1	5640	322	26		1793	1793	1793		dcf007684d8598380507220e605e8e2c_1952	7ef7127a3f11d26e5ed74c78ba404004_5983	Pseudomonase_1_01943
hyaC		Ni/Fe-hydrogenase b-type cytochrome subunit	3	3	1	1	5641	322	27		707	707	707		dcf007684d8598380507220e605e8e2c_1954	7ef7127a3f11d26e5ed74c78ba404004_5981	Pseudomonase_1_01942
hyaD		hydrogenase 1 maturation protease	3	3	1	1	5642	322	28		587	587	587		dcf007684d8598380507220e605e8e2c_1956	7ef7127a3f11d26e5ed74c78ba404004_5979	Pseudomonase_1_01941
hyaE		hydrogenase-1 operon protein HyaE	3	3	1	1	5643	322	29		398	398	398		dcf007684d8598380507220e605e8e2c_1958	7ef7127a3f11d26e5ed74c78ba404004_5977	Pseudomonase_1_01940
hyaF		hydrogenase expression/formation protein	3	3	1	1	5644	322	30		857	857	857		dcf007684d8598380507220e605e8e2c_1960	7ef7127a3f11d26e5ed74c78ba404004_5975	Pseudomonase_1_01939
appC		cytochrome bd-II oxidase subunit 1	3	3	1	1	5645	322	31		1544	1544	1544		dcf007684d8598380507220e605e8e2c_1962	7ef7127a3f11d26e5ed74c78ba404004_5973	Pseudomonase_1_01938
appB		cytochrome d ubiquinol oxidase subunit II	3	3	1	1	5646	322	32		1136	1136	1136		dcf007684d8598380507220e605e8e2c_1964	7ef7127a3f11d26e5ed74c78ba404004_5971	Pseudomonase_1_01937
cbdX		cytochrome bd-II oxidase subunit CbdX	3	3	1	1	5647	322	33		92	92	92		dcf007684d8598380507220e605e8e2c_1966	7ef7127a3f11d26e5ed74c78ba404004_5969	Pseudomonase_1_01936
appA		bifunctional acid phosphatase/4-phytase	3	3	1	1	5648	322	35		1310	1310	1310		dcf007684d8598380507220e605e8e2c_1968	7ef7127a3f11d26e5ed74c78ba404004_5967	Pseudomonase_1_01935
cspG		cold shock protein CspG	3	3	1	1	5650	322	36		212	212	212		dcf007684d8598380507220e605e8e2c_1972	7ef7127a3f11d26e5ed74c78ba404004_5963	Pseudomonase_1_01934
gnsA		addiction module toxin, GnsA/GnsB family	3	3	1	1	5651	322	37		173	173	173		dcf007684d8598380507220e605e8e2c_1978	7ef7127a3f11d26e5ed74c78ba404004_5957	Pseudomonase_1_01933
yccM		4Fe-4S binding protein	3	3	1	1	5652	322	52		1073	1073	1073		dcf007684d8598380507220e605e8e2c_1980	7ef7127a3f11d26e5ed74c78ba404004_5955	Pseudomonase_1_01932
torT		TMAO reductase system periplasmic protein TorT	3	3	1	1	5654	322	53		1028	1028	1028		dcf007684d8598380507220e605e8e2c_2032	7ef7127a3f11d26e5ed74c78ba404004_5951	Pseudomonase_1_01930
torR		two-component system response regulator TorR	3	3	1	1	5655	322	17		692	692	692		dcf007684d8598380507220e605e8e2c_2034	7ef7127a3f11d26e5ed74c78ba404004_5949	Pseudomonase_1_01929
torC		pentaheme c-type cytochrome TorC	3	3	1	1	5656	322	16		1172	1172	1172		dcf007684d8598380507220e605e8e2c_2036	7ef7127a3f11d26e5ed74c78ba404004_5947	Pseudomonase_1_01928
torA		trimethylamine-N-oxide reductase TorA	3	3	1	1	5657	322	15		2546	2546	2546		dcf007684d8598380507220e605e8e2c_2038	7ef7127a3f11d26e5ed74c78ba404004_5945	Pseudomonase_1_01927
torD		molecular chaperone TorD	3	3	1	1	5658	322	14		599	599	599		dcf007684d8598380507220e605e8e2c_2040	7ef7127a3f11d26e5ed74c78ba404004_5943	Pseudomonase_1_01926
cbpM		chaperone modulator CbpM	3	3	1	1	5659	322	13		305	305	305		dcf007684d8598380507220e605e8e2c_2042	7ef7127a3f11d26e5ed74c78ba404004_5941	Pseudomonase_1_01925
cbpA		curved DNA-binding protein	3	3	1	1	5660	322	12		920	920	920		dcf007684d8598380507220e605e8e2c_2044	7ef7127a3f11d26e5ed74c78ba404004_5939	Pseudomonase_1_01924
agp		bifunctional glucose-1-phosphatase/inositol phosphatase	3	3	1	1	5662	322	10		1241	1241	1241		dcf007684d8598380507220e605e8e2c_2048	7ef7127a3f11d26e5ed74c78ba404004_5935	Pseudomonase_1_01923
group_649		IS110 family transposase	3	3	1	1	6104	174	1		239	1076	518	1c58dc8b1c0b0cb7c89dc05980566ffe_10708	dcf007684d8598380507220e605e8e2c_9207		Pseudomonase_1_09946
yccJ		YccJ family protein	3	3	1	1	5663	322	9		227	227	227		dcf007684d8598380507220e605e8e2c_2050	7ef7127a3f11d26e5ed74c78ba404004_5933	Pseudomonase_1_01922
wrbA		NAD(P)H:quinone oxidoreductase	3	3	1	1	5664	322	8		596	596	596		dcf007684d8598380507220e605e8e2c_2052	7ef7127a3f11d26e5ed74c78ba404004_5931	Pseudomonase_1_01921
rutG		pyrimidine utilization transport protein G	3	3	1	1	5670	408	1		1328	1328	1328		dcf007684d8598380507220e605e8e2c_2056	7ef7127a3f11d26e5ed74c78ba404004_5927	Pseudomonase_1_01919
rutF		pyrimidine utilization flavin reductase protein F	3	3	1	1	5669	408	2		494	494	494		dcf007684d8598380507220e605e8e2c_2058	7ef7127a3f11d26e5ed74c78ba404004_5925	Pseudomonase_1_01918
rutE		malonic semialdehyde reductase	3	3	1	1	5668	408	3		590	590	590		dcf007684d8598380507220e605e8e2c_2060	7ef7127a3f11d26e5ed74c78ba404004_5923	Pseudomonase_1_01917
rutD		pyrimidine utilization protein D	3	3	1	1	5667	408	4		800	800	800		dcf007684d8598380507220e605e8e2c_2062	7ef7127a3f11d26e5ed74c78ba404004_5921	Pseudomonase_1_01916
rutC		3-aminoacrylate deaminase	3	3	1	1	5666	408	5		386	386	386		dcf007684d8598380507220e605e8e2c_2064	7ef7127a3f11d26e5ed74c78ba404004_5919	Pseudomonase_1_01915
rutA		pyrimidine utilization protein A	3	3	1	1	5674	408	7		1091	1091	1091		dcf007684d8598380507220e605e8e2c_2068	7ef7127a3f11d26e5ed74c78ba404004_5915	Pseudomonase_1_01913
rutR		HTH-type transcriptional regulator RutR	3	3	1	1	5675	408	8		638	638	638		dcf007684d8598380507220e605e8e2c_2070	7ef7127a3f11d26e5ed74c78ba404004_5913	Pseudomonase_1_01912
putA		trifunctional transcriptional regulator/proline dehydrogenase/L-glutamate gamma-semialdehyde dehydrogenase	3	3	1	1	5676	408	10		3962	3962	3962		dcf007684d8598380507220e605e8e2c_2072	7ef7127a3f11d26e5ed74c78ba404004_5911	Pseudomonase_1_01911
WP_219102342.1		hypothetical protein	3	3	1	1	5506	411	3		626	719	678		dcf007684d8598380507220e605e8e2c_558	7ef7127a3f11d26e5ed74c78ba404004_7647	Pseudomonase_1_08915
WP_013214046.1		hypothetical protein	3	3	1	1	7952	1	196		935	2042	1673	1c58dc8b1c0b0cb7c89dc05980566ffe_10714	dcf007684d8598380507220e605e8e2c_9213		Pseudomonase_1_09631
WP_000979523.1		hypothetical protein	3	3	1	1	5677	408	9		209	209	209		dcf007684d8598380507220e605e8e2c_2074	7ef7127a3f11d26e5ed74c78ba404004_5909	Pseudomonase_1_01910
WP_000497947.1		FTR1 family protein	3	3	1	1	5673	501	1		830	830	830		dcf007684d8598380507220e605e8e2c_2078	7ef7127a3f11d26e5ed74c78ba404004_5905	Pseudomonase_1_01908
efeO		iron uptake system protein EfeO	3	3	1	1	5672	501	2		1127	1127	1127		dcf007684d8598380507220e605e8e2c_2080	7ef7127a3f11d26e5ed74c78ba404004_5903	Pseudomonase_1_01907
efeB		iron uptake transporter deferrochelatase/peroxidase subunit	3	3	1	1	5782	501	3		1271	1271	1271		dcf007684d8598380507220e605e8e2c_2082	7ef7127a3f11d26e5ed74c78ba404004_5901	Pseudomonase_1_01906
pgaD		poly-beta-1,6-N-acetyl-D-glucosamine biosynthesis protein PgaD	3	3	1	1	5735	312	3		413	413	413		dcf007684d8598380507220e605e8e2c_2086	7ef7127a3f11d26e5ed74c78ba404004_5897	Pseudomonase_1_01904
pgaC		poly-beta-1,6-N-acetyl-D-glucosamine synthase	3	3	1	1	5734	312	4		1325	1325	1325		dcf007684d8598380507220e605e8e2c_2088	7ef7127a3f11d26e5ed74c78ba404004_5895	Pseudomonase_1_01903
pgaB		poly-beta-1,6-N-acetyl-D-glucosamine N-deacetylase PgaB	3	3	1	1	5733	312	5		2018	2018	2018		dcf007684d8598380507220e605e8e2c_2090	7ef7127a3f11d26e5ed74c78ba404004_5893	Pseudomonase_1_01902
pgaA		poly-beta-1,6 N-acetyl-D-glucosamine export porin PgaA	3	3	1	1	5732	312	6		2423	2423	2423		dcf007684d8598380507220e605e8e2c_2092	7ef7127a3f11d26e5ed74c78ba404004_5891	Pseudomonase_1_01901
dgcT		GGDEF domain-containing protein	3	3	1	1	5731	312	7		1367	1367	1367		dcf007684d8598380507220e605e8e2c_2094	7ef7127a3f11d26e5ed74c78ba404004_5889	Pseudomonase_1_01900
ghrA		glyoxylate/hydroxypyruvate reductase GhrA	3	3	1	1	5730	312	8		938	938	938		dcf007684d8598380507220e605e8e2c_2099	7ef7127a3f11d26e5ed74c78ba404004_5884	Pseudomonase_1_01898
ycdX		zinc-binding phosphatase	3	3	1	1	5729	312	9		737	737	737		dcf007684d8598380507220e605e8e2c_2101	7ef7127a3f11d26e5ed74c78ba404004_5882	Pseudomonase_1_01897
ycdY		molecular chaperone YcdY	3	3	1	1	5728	312	10		554	554	554		dcf007684d8598380507220e605e8e2c_2103	7ef7127a3f11d26e5ed74c78ba404004_5880	Pseudomonase_1_01896
csgG		curli production assembly/transport protein CsgG	3	3	1	1	5726	312	12		833	833	833		dcf007684d8598380507220e605e8e2c_2107	7ef7127a3f11d26e5ed74c78ba404004_5876	Pseudomonase_1_01894
csgF		curli production assembly/transport protein CsgF	3	3	1	1	5725	312	13		416	416	416		dcf007684d8598380507220e605e8e2c_2109	7ef7127a3f11d26e5ed74c78ba404004_5874	Pseudomonase_1_01893
csgE		curli production assembly/transport protein CsgE	3	3	1	1	5724	312	14		389	389	389		dcf007684d8598380507220e605e8e2c_2111	7ef7127a3f11d26e5ed74c78ba404004_5872	Pseudomonase_1_01892
csgD		transcriptional regulator CsgD	3	3	1	1	5723	312	15		650	650	650		dcf007684d8598380507220e605e8e2c_2113	7ef7127a3f11d26e5ed74c78ba404004_5870	Pseudomonase_1_01891
csgB		curlin minor subunit CsgB	3	3	1	1	5722	312	16		455	455	455		dcf007684d8598380507220e605e8e2c_2115	7ef7127a3f11d26e5ed74c78ba404004_5868	Pseudomonase_1_01890
csgA		curlin major subunit CsgA	3	3	1	1	5721	312	17		458	458	458		dcf007684d8598380507220e605e8e2c_2117	7ef7127a3f11d26e5ed74c78ba404004_5866	Pseudomonase_1_01889
csgC		curli assembly protein CsgC	3	3	1	1	5720	312	18		332	332	332		dcf007684d8598380507220e605e8e2c_2119	7ef7127a3f11d26e5ed74c78ba404004_5864	Pseudomonase_1_01888
ymdA		type 1 fimbrial protein	3	3	1	1	5719	312	19		311	311	311		dcf007684d8598380507220e605e8e2c_2121	7ef7127a3f11d26e5ed74c78ba404004_5862	Pseudomonase_1_01887
WP_003026803.1		GNAT family N-acetyltransferase	3	3	1	1	7806	1	437		482	482	482	1c58dc8b1c0b0cb7c89dc05980566ffe_10788	dcf007684d8598380507220e605e8e2c_7194		Pseudomonase_1_09769
ymdB		O-acetyl-ADP-ribose deacetylase	3	3	1	1	5718	312	20		533	533	533		dcf007684d8598380507220e605e8e2c_2123	7ef7127a3f11d26e5ed74c78ba404004_5860	Pseudomonase_1_01886
clsC		cardiolipin synthase ClsC	3	3	1	1	5717	312	21		1481	1481	1481		dcf007684d8598380507220e605e8e2c_2125	7ef7127a3f11d26e5ed74c78ba404004_5858	Pseudomonase_1_01885
mdoC		glucans biosynthesis protein MdoC	3	3	1	1	5716	312	22		1157	1157	1157		dcf007684d8598380507220e605e8e2c_2127	7ef7127a3f11d26e5ed74c78ba404004_5856	Pseudomonase_1_01884
mdoH		glucans biosynthesis glucosyltransferase MdoH	3	3	1	1	5714	312	24		2513	2543	2533		dcf007684d8598380507220e605e8e2c_2131	7ef7127a3f11d26e5ed74c78ba404004_5852	Pseudomonase_1_01882
yceK		YceK/YidQ family lipoprotein	3	3	1	1	5713	312	25		227	227	227		dcf007684d8598380507220e605e8e2c_2133	7ef7127a3f11d26e5ed74c78ba404004_5850	Pseudomonase_1_01881
group_6525	msyB	MysB family protein	3	3	1	1	5712	312	26		374	374	374		dcf007684d8598380507220e605e8e2c_2135	7ef7127a3f11d26e5ed74c78ba404004_5848	Pseudomonase_1_01880
mdtG		multidrug efflux MFS transporter MdtG	3	3	1	1	5711	312	27		1226	1226	1226		dcf007684d8598380507220e605e8e2c_2137	7ef7127a3f11d26e5ed74c78ba404004_5846	Pseudomonase_1_01879
lpxL		kdo(2)-lipid IV(A) lauroyltransferase	3	3	1	1	5710	312	28		920	920	920		dcf007684d8598380507220e605e8e2c_2139	7ef7127a3f11d26e5ed74c78ba404004_5844	Pseudomonase_1_01878
trhO		rhodanese-related sulfurtransferase	3	3	1	1	5709	312	29		1052	1052	1052		dcf007684d8598380507220e605e8e2c_2141	7ef7127a3f11d26e5ed74c78ba404004_5842	Pseudomonase_1_01877
yceI		YceI family protein	3	3	1	1	5708	312	30		575	575	575		dcf007684d8598380507220e605e8e2c_2143	7ef7127a3f11d26e5ed74c78ba404004_5840	Pseudomonase_1_01876
yceJ		cytochrome b	3	3	1	1	5707	312	31		566	566	566		dcf007684d8598380507220e605e8e2c_2145	7ef7127a3f11d26e5ed74c78ba404004_5838	Pseudomonase_1_01875
WP_001253418.1		YceO family protein	3	3	1	1	5706	312	32		113	113	113		dcf007684d8598380507220e605e8e2c_2147	7ef7127a3f11d26e5ed74c78ba404004_5836	Pseudomonase_1_01874
solA		N-methyl-L-tryptophan oxidase	3	3	1	1	5705	312	33		1118	1118	1118		dcf007684d8598380507220e605e8e2c_2149	7ef7127a3f11d26e5ed74c78ba404004_5834	Pseudomonase_1_01873
dinI		DNA damage-inducible protein I	3	3	1	1	5703	312	35		245	245	245		dcf007684d8598380507220e605e8e2c_2153	7ef7127a3f11d26e5ed74c78ba404004_5830	Pseudomonase_1_01871
pyrC		dihydroorotase	3	3	1	1	5702	312	36		1046	1046	1046		dcf007684d8598380507220e605e8e2c_2155	7ef7127a3f11d26e5ed74c78ba404004_5828	Pseudomonase_1_01870
yceB		lipoprotein	3	3	1	1	5701	312	37		560	560	560		dcf007684d8598380507220e605e8e2c_2157	7ef7127a3f11d26e5ed74c78ba404004_5826	Pseudomonase_1_01869
grxB		glutaredoxin 2	3	3	1	1	5700	312	38		647	647	647		dcf007684d8598380507220e605e8e2c_2159	7ef7127a3f11d26e5ed74c78ba404004_5824	Pseudomonase_1_01868
mdtH		multidrug efflux MFS transporter MdtH	3	3	1	1	5699	312	39		1208	1208	1208		dcf007684d8598380507220e605e8e2c_2161	7ef7127a3f11d26e5ed74c78ba404004_5822	Pseudomonase_1_01867
rimJ		ribosomal protein S5-alanine N-acetyltransferase	3	3	1	1	5698	312	40		584	584	584		dcf007684d8598380507220e605e8e2c_2163	7ef7127a3f11d26e5ed74c78ba404004_5820	Pseudomonase_1_01866
yceH		YceH family protein	3	3	1	1	5697	312	41		647	647	647		dcf007684d8598380507220e605e8e2c_2165	7ef7127a3f11d26e5ed74c78ba404004_5818	Pseudomonase_1_01865
yceM		Gfo/Idh/MocA family oxidoreductase	3	3	1	1	5696	312	42		923	923	923		dcf007684d8598380507220e605e8e2c_2167	7ef7127a3f11d26e5ed74c78ba404004_5816	Pseudomonase_1_01864
murJ		murein biosynthesis integral membrane protein MurJ	3	3	1	1	5695	312	43		1535	1535	1535		dcf007684d8598380507220e605e8e2c_2169	7ef7127a3f11d26e5ed74c78ba404004_5814	Pseudomonase_1_01863
flgN		flagella biosynthesis chaperone FlgN	3	3	1	1	5694	312	44		416	416	416		dcf007684d8598380507220e605e8e2c_2171	7ef7127a3f11d26e5ed74c78ba404004_5812	Pseudomonase_1_01862
flgM		anti-sigma-28 factor FlgM	3	3	1	1	5693	312	45		293	293	293		dcf007684d8598380507220e605e8e2c_2173	7ef7127a3f11d26e5ed74c78ba404004_5810	Pseudomonase_1_01861
flgA		flagellar basal body P-ring formation protein FlgA	3	3	1	1	5692	312	46		659	659	659		dcf007684d8598380507220e605e8e2c_2175	7ef7127a3f11d26e5ed74c78ba404004_5808	Pseudomonase_1_01860
flgB		flagellar basal body rod protein FlgB	3	3	1	1	5691	312	47		416	416	416		dcf007684d8598380507220e605e8e2c_2177	7ef7127a3f11d26e5ed74c78ba404004_5806	Pseudomonase_1_01859
flgC		flagellar basal body rod protein FlgC	3	3	1	1	5690	312	48		404	404	404		dcf007684d8598380507220e605e8e2c_2179	7ef7127a3f11d26e5ed74c78ba404004_5804	Pseudomonase_1_01858
flgD		flagellar hook assembly protein FlgD	3	3	1	1	5689	312	49		695	695	695		dcf007684d8598380507220e605e8e2c_2181	7ef7127a3f11d26e5ed74c78ba404004_5802	Pseudomonase_1_01857
flgE		flagellar hook protein FlgE	3	3	1	1	5688	312	50		1205	1205	1205		dcf007684d8598380507220e605e8e2c_2183	7ef7127a3f11d26e5ed74c78ba404004_5800	Pseudomonase_1_01856
flgF		flagellar basal-body rod protein FlgF	3	3	1	1	5687	312	51		755	755	755		dcf007684d8598380507220e605e8e2c_2185	7ef7127a3f11d26e5ed74c78ba404004_5798	Pseudomonase_1_01855
flgG		flagellar basal-body rod protein FlgG	3	3	1	1	5686	312	52		782	782	782		dcf007684d8598380507220e605e8e2c_2187	7ef7127a3f11d26e5ed74c78ba404004_5796	Pseudomonase_1_01854
flgH		flagellar basal body L-ring protein FlgH	3	3	1	1	5685	312	53		698	698	698		dcf007684d8598380507220e605e8e2c_2189	7ef7127a3f11d26e5ed74c78ba404004_5794	Pseudomonase_1_01853
flgI		flagellar basal body P-ring protein FlgI	3	3	1	1	5684	312	54		1097	1097	1097		dcf007684d8598380507220e605e8e2c_2191	7ef7127a3f11d26e5ed74c78ba404004_5792	Pseudomonase_1_01852
flgJ		flagellar assembly peptidoglycan hydrolase FlgJ	3	3	1	1	5683	312	55		941	941	941		dcf007684d8598380507220e605e8e2c_2193	7ef7127a3f11d26e5ed74c78ba404004_5790	Pseudomonase_1_01851
flgK		flagellar hook-associated protein FlgK	3	3	1	1	5682	312	56		1643	1643	1643		dcf007684d8598380507220e605e8e2c_2195	7ef7127a3f11d26e5ed74c78ba404004_5788	Pseudomonase_1_01850
flgL		flagellar hook-associated protein FlgL	3	3	1	1	5681	312	57		953	953	953		dcf007684d8598380507220e605e8e2c_2197	7ef7127a3f11d26e5ed74c78ba404004_5786	Pseudomonase_1_01849
rne		ribonuclease E	3	3	1	1	5680	312	58		3185	3185	3185		dcf007684d8598380507220e605e8e2c_2199	7ef7127a3f11d26e5ed74c78ba404004_5784	Pseudomonase_1_01848
rluC		23S rRNA pseudouridine(955/2504/2580) synthase RluC	3	3	1	1	5679	312	59		959	959	959		dcf007684d8598380507220e605e8e2c_2201	7ef7127a3f11d26e5ed74c78ba404004_5782	Pseudomonase_1_01847
yceD		23S rRNA accumulation protein YceD	3	3	1	1	5737	312	1		521	521	521		dcf007684d8598380507220e605e8e2c_2205	7ef7127a3f11d26e5ed74c78ba404004_5778	Pseudomonase_1_01845
pabC		aminodeoxychorismate lyase	3	3	1	1	563	465	3		809	809	809		dcf007684d8598380507220e605e8e2c_2221	7ef7127a3f11d26e5ed74c78ba404004_5762	Pseudomonase_1_09338
yceG		cell division protein YceG	3	3	1	1	562	465	4		1022	1022	1022		dcf007684d8598380507220e605e8e2c_2223	7ef7127a3f11d26e5ed74c78ba404004_5760	Pseudomonase_1_09337
tmk		dTMP kinase	3	3	1	1	561	465	5		641	641	641		dcf007684d8598380507220e605e8e2c_2225	7ef7127a3f11d26e5ed74c78ba404004_5758	Pseudomonase_1_09336
holB		DNA polymerase III subunit delta'	3	3	1	1	560	465	2		1004	1004	1004		dcf007684d8598380507220e605e8e2c_2227	7ef7127a3f11d26e5ed74c78ba404004_5756	Pseudomonase_1_09335
ycfH		metal-dependent hydrolase	3	3	1	1	571	465	1		797	797	797		dcf007684d8598380507220e605e8e2c_2229	7ef7127a3f11d26e5ed74c78ba404004_5754	Pseudomonase_1_09334
hinT		purine nucleoside phosphoramidase	3	3	1	1	558	352	4		359	359	359		dcf007684d8598380507220e605e8e2c_2235	7ef7127a3f11d26e5ed74c78ba404004_5748	Pseudomonase_1_09331
lpoB		penicillin-binding protein activator LpoB	3	3	1	1	520	352	6		641	641	641		dcf007684d8598380507220e605e8e2c_2239	7ef7127a3f11d26e5ed74c78ba404004_5744	Pseudomonase_1_09329
group_657	tnpB	IS66 family insertion sequence element accessory protein TnpB	3	3	1	1	4487	17	55		71	350	164	1c58dc8b1c0b0cb7c89dc05980566ffe_11035	dcf007684d8598380507220e605e8e2c_4045	7ef7127a3f11d26e5ed74c78ba404004_7543
thiK		thiamine kinase	3	3	1	1	521	352	7		824	824	824		dcf007684d8598380507220e605e8e2c_2241	7ef7127a3f11d26e5ed74c78ba404004_5742	Pseudomonase_1_09328
nagZ		beta-N-acetylhexosaminidase	3	3	1	1	522	352	8		1025	1025	1025		dcf007684d8598380507220e605e8e2c_2243	7ef7127a3f11d26e5ed74c78ba404004_5740	Pseudomonase_1_09327
ycfP		alpha/beta hydrolase YcfP	3	3	1	1	523	352	9		542	542	542		dcf007684d8598380507220e605e8e2c_2245	7ef7127a3f11d26e5ed74c78ba404004_5738	Pseudomonase_1_09326
ndh		NADH-quinone dehydrogenase	3	3	1	1	524	352	10		1304	1304	1304		dcf007684d8598380507220e605e8e2c_2247	7ef7127a3f11d26e5ed74c78ba404004_5736	Pseudomonase_1_09325
ycfJ		glycine zipper 2TM domain-containing protein	3	3	1	1	525	352	11		539	539	539		dcf007684d8598380507220e605e8e2c_2249	7ef7127a3f11d26e5ed74c78ba404004_5734	Pseudomonase_1_09324
bhsA		multiple stress resistance protein BhsA	3	3	1	1	527	352	13		257	257	257		dcf007684d8598380507220e605e8e2c_2253	7ef7127a3f11d26e5ed74c78ba404004_5730	Pseudomonase_1_09322
ldtC		L,D-transpeptidase LdtC	3	3	1	1	528	352	14		959	962	961		dcf007684d8598380507220e605e8e2c_2255	7ef7127a3f11d26e5ed74c78ba404004_5728	Pseudomonase_1_09321
lolC		lipoprotein-releasing ABC transporter permease subunit LolC	3	3	1	1	532	352	16		1199	1199	1199		dcf007684d8598380507220e605e8e2c_2261	7ef7127a3f11d26e5ed74c78ba404004_5722	Pseudomonase_1_09317
lolD		lipoprotein-releasing ABC transporter ATP-binding protein LolD	3	3	1	1	533	352	17		701	701	701		dcf007684d8598380507220e605e8e2c_2263	7ef7127a3f11d26e5ed74c78ba404004_5720	Pseudomonase_1_09316
lolE		lipoprotein-releasing ABC transporter permease subunit LolE	3	3	1	1	534	352	18		1238	1244	1242		dcf007684d8598380507220e605e8e2c_2265	7ef7127a3f11d26e5ed74c78ba404004_5718	Pseudomonase_1_09315
nagK		N-acetylglucosamine kinase	3	3	1	1	535	352	19		911	911	911		dcf007684d8598380507220e605e8e2c_2267	7ef7127a3f11d26e5ed74c78ba404004_5716	Pseudomonase_1_09314
cobB		NAD-dependent protein deacylase	3	3	1	1	536	352	20		821	821	821		dcf007684d8598380507220e605e8e2c_2269	7ef7127a3f11d26e5ed74c78ba404004_5714	Pseudomonase_1_09313
WP_000720230.1		TPM domain-containing protein	3	3	1	1	537	352	23		785	785	785		dcf007684d8598380507220e605e8e2c_2271	7ef7127a3f11d26e5ed74c78ba404004_5712	Pseudomonase_1_09312
ymfA		DUF3592 domain-containing protein	3	3	1	1	538	352	22		461	461	461		dcf007684d8598380507220e605e8e2c_2273	7ef7127a3f11d26e5ed74c78ba404004_5710	Pseudomonase_1_09311
potD		spermidine/putrescine ABC transporter substrate-binding protein PotD	3	3	1	1	539	352	21		1046	1046	1046		dcf007684d8598380507220e605e8e2c_2275	7ef7127a3f11d26e5ed74c78ba404004_5708	Pseudomonase_1_09310
potB		spermidine/putrescine ABC transporter permease PotB	3	3	1	1	549	403	1		857	857	857		dcf007684d8598380507220e605e8e2c_2279	7ef7127a3f11d26e5ed74c78ba404004_5704	Pseudomonase_1_09308
potA		spermidine/putrescine ABC transporter ATP-binding protein PotA	3	3	1	1	548	403	2		1136	1136	1136		dcf007684d8598380507220e605e8e2c_2281	7ef7127a3f11d26e5ed74c78ba404004_5702	Pseudomonase_1_09307
pepT		peptidase T	3	3	1	1	547	403	11		1226	1226	1226		dcf007684d8598380507220e605e8e2c_2283	7ef7127a3f11d26e5ed74c78ba404004_5700	Pseudomonase_1_09306
roxA		[50S ribosomal protein L16]-arginine 3-hydroxylase	3	3	1	1	546	403	10		1121	1121	1121		dcf007684d8598380507220e605e8e2c_2285	7ef7127a3f11d26e5ed74c78ba404004_5698	Pseudomonase_1_09305
phoQ		two-component system sensor histidine kinase PhoQ	3	3	1	1	545	403	9		1460	1460	1460		dcf007684d8598380507220e605e8e2c_2287	7ef7127a3f11d26e5ed74c78ba404004_5696	Pseudomonase_1_09304
phoP		two-component system response regulator PhoP	3	3	1	1	544	403	8		671	671	671		dcf007684d8598380507220e605e8e2c_2289	7ef7127a3f11d26e5ed74c78ba404004_5694	Pseudomonase_1_09303
purB		adenylosuccinate lyase	3	3	1	1	543	403	7		1370	1370	1370		dcf007684d8598380507220e605e8e2c_2291	7ef7127a3f11d26e5ed74c78ba404004_5692	Pseudomonase_1_09302
hflD		high frequency lysogenization protein HflD	3	3	1	1	542	403	6		641	641	641		dcf007684d8598380507220e605e8e2c_2293	7ef7127a3f11d26e5ed74c78ba404004_5690	Pseudomonase_1_09301
mnmA		tRNA 2-thiouridine(34) synthase MnmA	3	3	1	1	541	403	5		1106	1106	1106		dcf007684d8598380507220e605e8e2c_2295	7ef7127a3f11d26e5ed74c78ba404004_5688	Pseudomonase_1_09300
nudJ		phosphatase NudJ	3	3	1	1	540	403	4		461	461	461		dcf007684d8598380507220e605e8e2c_2297	7ef7127a3f11d26e5ed74c78ba404004_5686	Pseudomonase_1_09299
rluE		23S rRNA pseudouridine(2457) synthase RluE	3	3	1	1	801	403	3		653	653	653		dcf007684d8598380507220e605e8e2c_2299	7ef7127a3f11d26e5ed74c78ba404004_5684	Pseudomonase_1_09298
sitD		iron/manganese ABC transporter permease subunit SitD	3	3	1	1	786	453	2		854	857	856		dcf007684d8598380507220e605e8e2c_2303	7ef7127a3f11d26e5ed74c78ba404004_5538	Pseudomonase_1_04642
sitC		iron/manganese ABC transporter permease subunit SitC	3	3	1	1	612	453	3		857	857	857		dcf007684d8598380507220e605e8e2c_2305	7ef7127a3f11d26e5ed74c78ba404004_5536	Pseudomonase_1_04643
sitB		iron/manganese ABC transporter ATP-binding protein SitB	3	3	1	1	613	453	4		827	827	827		dcf007684d8598380507220e605e8e2c_2307	7ef7127a3f11d26e5ed74c78ba404004_5534	Pseudomonase_1_04644
sitA		iron/manganese ABC transporter substrate-binding protein SitA	3	3	1	1	614	453	5		914	914	914		dcf007684d8598380507220e605e8e2c_2309	7ef7127a3f11d26e5ed74c78ba404004_5532	Pseudomonase_1_04645
WP_000567449.1		hypothetical protein	3	3	1	1	615	453	1		758	770	766		dcf007684d8598380507220e605e8e2c_2311	7ef7127a3f11d26e5ed74c78ba404004_5530	Pseudomonase_1_04646
WP_001445545.1		hypothetical protein	3	3	1	1	800	364	1		125	125	125		dcf007684d8598380507220e605e8e2c_2315	7ef7127a3f11d26e5ed74c78ba404004_5526	Pseudomonase_1_04648
ycgX		DUF1398 domain-containing protein	3	3	1	1	799	364	2		404	404	404		dcf007684d8598380507220e605e8e2c_2317	7ef7127a3f11d26e5ed74c78ba404004_5524	Pseudomonase_1_04649
bluR		DNA-binding transcriptional repressor BluR	3	3	1	1	798	364	20		731	731	731		dcf007684d8598380507220e605e8e2c_2319	7ef7127a3f11d26e5ed74c78ba404004_5522	Pseudomonase_1_04650
bluF		blue light-responsive regulator BluF	3	3	1	1	797	364	19		1211	1211	1211		dcf007684d8598380507220e605e8e2c_2321	7ef7127a3f11d26e5ed74c78ba404004_5520	Pseudomonase_1_04651
ycgZ		regulatory protein YcgZ	3	3	1	1	796	364	18		236	236	236		dcf007684d8598380507220e605e8e2c_2323	7ef7127a3f11d26e5ed74c78ba404004_5518	Pseudomonase_1_04652
ariR		biofilm/acid-resistance regulator AriR	3	3	1	1	794	364	17		266	266	266		dcf007684d8598380507220e605e8e2c_2327	7ef7127a3f11d26e5ed74c78ba404004_5514	Pseudomonase_1_04653
WP_001065750.1		hypothetical protein	3	3	1	1	793	364	15		248	248	248		dcf007684d8598380507220e605e8e2c_2329	7ef7127a3f11d26e5ed74c78ba404004_5512	Pseudomonase_1_04654
WP_001304450.1		hypothetical protein	3	3	1	1	10299	364	12		179	179	179		dcf007684d8598380507220e605e8e2c_2335	7ef7127a3f11d26e5ed74c78ba404004_5506	Pseudomonase_1_04657
ymgD		YmgD family protein	3	3	1	1	10302	364	9		329	335	333		dcf007684d8598380507220e605e8e2c_2341	7ef7127a3f11d26e5ed74c78ba404004_5500	Pseudomonase_1_04659
WP_000120099.1		hypothetical protein	3	3	1	1	10306	364	7		173	173	173		dcf007684d8598380507220e605e8e2c_2345	7ef7127a3f11d26e5ed74c78ba404004_5496	Pseudomonase_1_04661
minE		cell division topological specificity factor MinE	3	3	1	1	10308	364	5		266	266	266		dcf007684d8598380507220e605e8e2c_2353	7ef7127a3f11d26e5ed74c78ba404004_5488	Pseudomonase_1_04663
minC		septum site-determining protein MinC	3	3	1	1	10298	326	2		695	695	695		dcf007684d8598380507220e605e8e2c_2357	7ef7127a3f11d26e5ed74c78ba404004_5484	Pseudomonase_1_04665
ycgJ		YcgJ family protein	3	3	1	1	10297	326	3		368	368	368		dcf007684d8598380507220e605e8e2c_2359	7ef7127a3f11d26e5ed74c78ba404004_5482	Pseudomonase_1_04666
pliG		PPC domain-containing protein	3	3	1	1	10296	326	4		401	401	401		dcf007684d8598380507220e605e8e2c_2361	7ef7127a3f11d26e5ed74c78ba404004_5480	Pseudomonase_1_04667
WP_001295992.1		YcgL domain-containing protein	3	3	1	1	10295	326	5		293	293	293		dcf007684d8598380507220e605e8e2c_2363	7ef7127a3f11d26e5ed74c78ba404004_5478	Pseudomonase_1_04668
ycgM		fumarylacetoacetate hydrolase family protein	3	3	1	1	10294	326	6		659	659	659		dcf007684d8598380507220e605e8e2c_2365	7ef7127a3f11d26e5ed74c78ba404004_5476	Pseudomonase_1_04669
ycgN		YcgN family cysteine cluster protein	3	3	1	1	10293	326	7		446	446	446		dcf007684d8598380507220e605e8e2c_2367	7ef7127a3f11d26e5ed74c78ba404004_5474	Pseudomonase_1_04670
umuD		translesion error-prone DNA polymerase V autoproteolytic subunit	3	3	1	1	10291	326	9		419	419	419		dcf007684d8598380507220e605e8e2c_2371	7ef7127a3f11d26e5ed74c78ba404004_5470	Pseudomonase_1_04672
umuC		DNA polymerase V catalytic protein	3	3	1	1	10290	326	10		1268	1268	1268		dcf007684d8598380507220e605e8e2c_2373	7ef7127a3f11d26e5ed74c78ba404004_5468	Pseudomonase_1_04673
dsbB		disulfide bond formation protein DsbB	3	3	1	1	10289	326	11		530	530	530		dcf007684d8598380507220e605e8e2c_2375	7ef7127a3f11d26e5ed74c78ba404004_5466	Pseudomonase_1_04674
nhaB		Na(+)/H(+) antiporter NhaB	3	3	1	1	10288	326	12		1541	1541	1541		dcf007684d8598380507220e605e8e2c_2377	7ef7127a3f11d26e5ed74c78ba404004_5464	Pseudomonase_1_04675
fadR		fatty acid metabolism transcriptional regulator FadR	3	3	1	1	10287	326	13		719	719	719		dcf007684d8598380507220e605e8e2c_2379	7ef7127a3f11d26e5ed74c78ba404004_5462	Pseudomonase_1_04676
ycgB		SpoVR family protein	3	3	1	1	10286	326	14		1532	1532	1532		dcf007684d8598380507220e605e8e2c_2381	7ef7127a3f11d26e5ed74c78ba404004_5460	Pseudomonase_1_04677
dadA		D-amino acid dehydrogenase	3	3	1	1	10285	326	15		1298	1298	1298		dcf007684d8598380507220e605e8e2c_2383	7ef7127a3f11d26e5ed74c78ba404004_5458	Pseudomonase_1_04678
dadX		catabolic alanine racemase DadX	3	3	1	1	10284	326	16		1070	1070	1070		dcf007684d8598380507220e605e8e2c_2385	7ef7127a3f11d26e5ed74c78ba404004_5456	Pseudomonase_1_04679
cvrA		potassium/proton antiporter	3	3	1	1	10283	326	17		1736	1736	1736		dcf007684d8598380507220e605e8e2c_2387	7ef7127a3f11d26e5ed74c78ba404004_5454	Pseudomonase_1_04680
ldcA		muramoyltetrapeptide carboxypeptidase	3	3	1	1	10282	326	18		914	914	914		dcf007684d8598380507220e605e8e2c_2389	7ef7127a3f11d26e5ed74c78ba404004_5452	Pseudomonase_1_04681
emtA		membrane-bound lytic murein transglycosylase EmtA	3	3	1	1	10281	326	19		611	611	611		dcf007684d8598380507220e605e8e2c_2391	7ef7127a3f11d26e5ed74c78ba404004_5450	Pseudomonase_1_04682
ycgR		flagellar brake protein	3	3	1	1	10280	326	20		734	734	734		dcf007684d8598380507220e605e8e2c_2393	7ef7127a3f11d26e5ed74c78ba404004_5448	Pseudomonase_1_04683
ymgE		GlsB/YeaQ/YmgE family stress response membrane protein	3	3	1	1	10279	326	21		254	254	254		dcf007684d8598380507220e605e8e2c_2395	7ef7127a3f11d26e5ed74c78ba404004_5446	Pseudomonase_1_04684
WP_001298111.1		TonB-dependent receptor	3	3	1	1	10278	326	22		1970	1970	1970		dcf007684d8598380507220e605e8e2c_2397	7ef7127a3f11d26e5ed74c78ba404004_5444	Pseudomonase_1_04685
modD		ModD protein	3	3	1	1	10277	326	23		854	854	854		dcf007684d8598380507220e605e8e2c_2399	7ef7127a3f11d26e5ed74c78ba404004_5442	Pseudomonase_1_04686
WP_000904011.1		class I SAM-dependent methyltransferase	3	3	1	1	10276	326	24		812	812	812		dcf007684d8598380507220e605e8e2c_2401	7ef7127a3f11d26e5ed74c78ba404004_5440	Pseudomonase_1_04687
WP_000173319.1		ABC transporter ATP-binding protein	3	3	1	1	10275	326	25		758	758	758		dcf007684d8598380507220e605e8e2c_2403	7ef7127a3f11d26e5ed74c78ba404004_5438	Pseudomonase_1_04688
WP_001261262.1		iron ABC transporter permease	3	3	1	1	8495	326	26		980	980	980		dcf007684d8598380507220e605e8e2c_2405	7ef7127a3f11d26e5ed74c78ba404004_5436	Pseudomonase_1_04689
WP_000060149.1		iron ABC transporter substrate-binding protein	3	3	1	1	8496	326	27		1022	1022	1022		dcf007684d8598380507220e605e8e2c_2407	7ef7127a3f11d26e5ed74c78ba404004_5434	Pseudomonase_1_04690
treA		alpha,alpha-trehalase	3	3	1	1	8497	326	28		1697	1697	1697		dcf007684d8598380507220e605e8e2c_2409	7ef7127a3f11d26e5ed74c78ba404004_5432	Pseudomonase_1_04691
dhaM		dihydroxyacetone kinase phosphoryl donor subunit DhaM	3	3	1	1	8498	326	29		1418	1418	1418		dcf007684d8598380507220e605e8e2c_2411	7ef7127a3f11d26e5ed74c78ba404004_5430	Pseudomonase_1_04692
dhaL		dihydroxyacetone kinase subunit DhaL	3	3	1	1	8499	326	30		632	632	632		dcf007684d8598380507220e605e8e2c_2413	7ef7127a3f11d26e5ed74c78ba404004_5428	Pseudomonase_1_04693
dhaK		dihydroxyacetone kinase subunit DhaK	3	3	1	1	8500	326	31		1070	1070	1070		dcf007684d8598380507220e605e8e2c_2415	7ef7127a3f11d26e5ed74c78ba404004_5426	Pseudomonase_1_04694
dhaR		dihydroxyacetone kinase operon transcriptional regulator DhaR	3	3	1	1	8501	326	32		1919	1919	1919		dcf007684d8598380507220e605e8e2c_2417	7ef7127a3f11d26e5ed74c78ba404004_5424	Pseudomonase_1_04695
ychF		redox-regulated ATPase YchF	3	3	1	1	8502	326	33		1091	1091	1091		dcf007684d8598380507220e605e8e2c_2421	7ef7127a3f11d26e5ed74c78ba404004_5420	Pseudomonase_1_04696
pth		aminoacyl-tRNA hydrolase	3	3	1	1	8503	326	34		584	584	584		dcf007684d8598380507220e605e8e2c_2423	7ef7127a3f11d26e5ed74c78ba404004_5418	Pseudomonase_1_04697
ychH		stress-induced protein YchH	3	3	1	1	8504	326	35		278	278	278		dcf007684d8598380507220e605e8e2c_2425	7ef7127a3f11d26e5ed74c78ba404004_5416	Pseudomonase_1_04698
dauA		C4-dicarboxylic acid transporter DauA	3	3	1	1	8505	326	36		1652	1652	1652		dcf007684d8598380507220e605e8e2c_2427	7ef7127a3f11d26e5ed74c78ba404004_5414	Pseudomonase_1_04699
ispE		4-(cytidine 5'-diphospho)-2-C-methyl-D-erythritol kinase	3	3	1	1	8493	435	1		851	851	851		dcf007684d8598380507220e605e8e2c_2431	7ef7127a3f11d26e5ed74c78ba404004_5410	Pseudomonase_1_04701
lolB		lipoprotein insertase outer membrane protein LolB	3	3	1	1	8492	435	2		623	623	623		dcf007684d8598380507220e605e8e2c_2433	7ef7127a3f11d26e5ed74c78ba404004_5408	Pseudomonase_1_04702
hemA		glutamyl-tRNA reductase	3	3	1	1	8491	435	3		1256	1256	1256		dcf007684d8598380507220e605e8e2c_2435	7ef7127a3f11d26e5ed74c78ba404004_5406	Pseudomonase_1_04703
prfA		peptide chain release factor 1	3	3	1	1	8490	435	4		1082	1082	1082		dcf007684d8598380507220e605e8e2c_2437	7ef7127a3f11d26e5ed74c78ba404004_5404	Pseudomonase_1_04704
prmC		peptide chain release factor N(5)-glutamine methyltransferase	3	3	1	1	8489	435	7		833	833	833		dcf007684d8598380507220e605e8e2c_2439	7ef7127a3f11d26e5ed74c78ba404004_5402	Pseudomonase_1_04705
sirB2		invasion regulator SirB2	3	3	1	1	8488	435	6		392	392	392		dcf007684d8598380507220e605e8e2c_2441	7ef7127a3f11d26e5ed74c78ba404004_5400	Pseudomonase_1_04706
sirB1		invasion regulator SirB1	3	3	1	1	8553	435	5		809	809	809		dcf007684d8598380507220e605e8e2c_2443	7ef7127a3f11d26e5ed74c78ba404004_5398	Pseudomonase_1_04707
WP_000170954.1		type I toxin-antitoxin system toxin Ldr family protein	3	3	1	1	8487	388	13		107	107	107		dcf007684d8598380507220e605e8e2c_2447	7ef7127a3f11d26e5ed74c78ba404004_5394	Pseudomonase_1_04709
chaA		sodium-potassium/proton antiporter ChaA	3	3	1	1	8486	388	14		1100	1100	1100		dcf007684d8598380507220e605e8e2c_2449	7ef7127a3f11d26e5ed74c78ba404004_5392	Pseudomonase_1_04710
chaB		putative cation transport regulator ChaB	3	3	1	1	8485	388	15		230	230	230		dcf007684d8598380507220e605e8e2c_2451	7ef7127a3f11d26e5ed74c78ba404004_5390	Pseudomonase_1_04711
ychN		DsrE/F sulfur relay family protein YchN	3	3	1	1	8483	388	11		353	353	353		dcf007684d8598380507220e605e8e2c_2455	7ef7127a3f11d26e5ed74c78ba404004_5386	Pseudomonase_1_04713
narL		two-component system response regulator NarL	3	3	1	1	8481	388	9		650	650	650		dcf007684d8598380507220e605e8e2c_2459	7ef7127a3f11d26e5ed74c78ba404004_5382	Pseudomonase_1_04715
narX		nitrate/nitrite two-component system sensor histidine kinase NarX	3	3	1	1	8480	388	8		1796	1796	1796		dcf007684d8598380507220e605e8e2c_2461	7ef7127a3f11d26e5ed74c78ba404004_5380	Pseudomonase_1_04716
narK		nitrate transporter NarK	3	3	1	1	8479	388	7		1391	1391	1391		dcf007684d8598380507220e605e8e2c_2463	7ef7127a3f11d26e5ed74c78ba404004_5378	Pseudomonase_1_04718
narG		nitrate reductase subunit alpha	3	3	1	1	8478	388	6		3743	3743	3743		dcf007684d8598380507220e605e8e2c_2465	7ef7127a3f11d26e5ed74c78ba404004_5376	Pseudomonase_1_04719
narH		nitrate reductase subunit beta	3	3	1	1	8477	388	5		1538	1538	1538		dcf007684d8598380507220e605e8e2c_2467	7ef7127a3f11d26e5ed74c78ba404004_5374	Pseudomonase_1_04720
narJ		nitrate reductase molybdenum cofactor assembly chaperone	3	3	1	1	8581	388	4		710	710	710		dcf007684d8598380507220e605e8e2c_2469	7ef7127a3f11d26e5ed74c78ba404004_5372	Pseudomonase_1_04721
group_6668	narI	respiratory nitrate reductase subunit gamma	3	3	1	1	8582	388	3		677	677	677		dcf007684d8598380507220e605e8e2c_2471	7ef7127a3f11d26e5ed74c78ba404004_5370	Pseudomonase_1_04722
WP_001111618.1		IS4 family transposase	3	3	1	1	8583	388	2		1199	1199	1199		dcf007684d8598380507220e605e8e2c_2473	7ef7127a3f11d26e5ed74c78ba404004_5368	Pseudomonase_1_04723
rssB		two-component system response regulator RssB	3	3	1	1	8578	448	4		1013	1013	1013		dcf007684d8598380507220e605e8e2c_2490	7ef7127a3f11d26e5ed74c78ba404004_5351	Pseudomonase_1_04728
galU		UTP--glucose-1-phosphate uridylyltransferase GalU	3	3	1	1	8577	448	3		908	908	908		dcf007684d8598380507220e605e8e2c_2492	7ef7127a3f11d26e5ed74c78ba404004_5349	Pseudomonase_1_04729
hns		DNA-binding transcriptional regulator H-NS	3	3	1	1	8593	448	2		413	413	413		dcf007684d8598380507220e605e8e2c_2494	7ef7127a3f11d26e5ed74c78ba404004_5347	Pseudomonase_1_04730
tdk		thymidine kinase	3	3	1	1	8594	448	1		617	617	617		dcf007684d8598380507220e605e8e2c_2496	7ef7127a3f11d26e5ed74c78ba404004_5345	Pseudomonase_1_04731
ychE		NAAT family transporter YchE	3	3	1	1	8475	478	2		647	647	647		dcf007684d8598380507220e605e8e2c_2504	7ef7127a3f11d26e5ed74c78ba404004_5337	Pseudomonase_1_04734
oppC		oligopeptide ABC transporter permease OppC	3	3	1	1	8146	520	2		908	908	908		dcf007684d8598380507220e605e8e2c_2512	7ef7127a3f11d26e5ed74c78ba404004_5331	Pseudomonase_1_04739
oppD		murein tripeptide/oligopeptide ABC transporter ATP-binding protein OppD	3	3	1	1	8145	520	1		1013	1013	1013		dcf007684d8598380507220e605e8e2c_2514	7ef7127a3f11d26e5ed74c78ba404004_5329	Pseudomonase_1_04740
yciU		HI1450 family dsDNA-mimic protein	3	3	1	1	8176	309	3		329	329	329		dcf007684d8598380507220e605e8e2c_2518	7ef7127a3f11d26e5ed74c78ba404004_5325	Pseudomonase_1_04742
cls		cardiolipin synthase	3	3	1	1	8175	309	4		1460	1460	1460		dcf007684d8598380507220e605e8e2c_2520	7ef7127a3f11d26e5ed74c78ba404004_5323	Pseudomonase_1_04743
kch		voltage-gated potassium channel protein	3	3	1	1	8173	309	6		1253	1253	1253		dcf007684d8598380507220e605e8e2c_2524	7ef7127a3f11d26e5ed74c78ba404004_5319	Pseudomonase_1_04745
tonB		TonB system transport protein TonB	3	3	1	1	8171	309	8		716	716	716		dcf007684d8598380507220e605e8e2c_2528	7ef7127a3f11d26e5ed74c78ba404004_5315	Pseudomonase_1_04747
yciB		septation protein A	3	3	1	1	8168	309	11		539	539	539		dcf007684d8598380507220e605e8e2c_2532	7ef7127a3f11d26e5ed74c78ba404004_5311	Pseudomonase_1_04750
yciC		envelope biogenesis factor ElyC	3	3	1	1	8167	309	12		743	743	743		dcf007684d8598380507220e605e8e2c_2534	7ef7127a3f11d26e5ed74c78ba404004_5309	Pseudomonase_1_04751
ompW		outer membrane protein OmpW	3	3	1	1	8166	309	13		638	638	638		dcf007684d8598380507220e605e8e2c_2538	7ef7127a3f11d26e5ed74c78ba404004_5305	Pseudomonase_1_04752
yciE		ferritin-like domain-containing protein	3	3	1	1	8165	309	14		506	506	506		dcf007684d8598380507220e605e8e2c_2540	7ef7127a3f11d26e5ed74c78ba404004_5303	Pseudomonase_1_04753
yciF		ferritin-like domain-containing protein	3	3	1	1	8164	309	15		500	500	500		dcf007684d8598380507220e605e8e2c_2542	7ef7127a3f11d26e5ed74c78ba404004_5301	Pseudomonase_1_04754
yciG		general stress protein	3	3	1	1	8163	309	16		179	179	179		dcf007684d8598380507220e605e8e2c_2544	7ef7127a3f11d26e5ed74c78ba404004_5299	Pseudomonase_1_04755
trpA		tryptophan synthase subunit alpha	3	3	1	1	8162	309	17		806	806	806		dcf007684d8598380507220e605e8e2c_2546	7ef7127a3f11d26e5ed74c78ba404004_5297	Pseudomonase_1_04756
trpB		tryptophan synthase subunit beta	3	3	1	1	8161	309	18		1193	1193	1193		dcf007684d8598380507220e605e8e2c_2548	7ef7127a3f11d26e5ed74c78ba404004_5295	Pseudomonase_1_04757
trpCF		bifunctional indole-3-glycerol-phosphate synthase TrpC/phosphoribosylanthranilate isomerase TrpF	3	3	1	1	8160	309	19		1358	1361	1360		dcf007684d8598380507220e605e8e2c_2550	7ef7127a3f11d26e5ed74c78ba404004_5293	Pseudomonase_1_04758
trpD		bifunctional anthranilate synthase glutamate amidotransferase component TrpG/anthranilate phosphoribosyltransferase TrpD	3	3	1	1	8159	309	20		1595	1595	1595		dcf007684d8598380507220e605e8e2c_2552	7ef7127a3f11d26e5ed74c78ba404004_5291	Pseudomonase_1_04759
trpE		anthranilate synthase component I	3	3	1	1	8158	309	21		1562	1562	1562		dcf007684d8598380507220e605e8e2c_2554	7ef7127a3f11d26e5ed74c78ba404004_5289	Pseudomonase_1_04760
yciV_2		5'-3' exoribonuclease	3	3	1	1	8156	309	23		881	881	881		dcf007684d8598380507220e605e8e2c_2559	7ef7127a3f11d26e5ed74c78ba404004_5284	Pseudomonase_1_04761
yciO		L-threonylcarbamoyladenylate synthase	3	3	1	1	8155	309	24		620	620	620		dcf007684d8598380507220e605e8e2c_2561	7ef7127a3f11d26e5ed74c78ba404004_5282	Pseudomonase_1_04762
rluB		23S rRNA pseudouridine(2605) synthase RluB	3	3	1	1	8153	309	26		875	875	875		dcf007684d8598380507220e605e8e2c_2565	7ef7127a3f11d26e5ed74c78ba404004_5278	Pseudomonase_1_04764
WP_000622019.1		hypothetical protein	3	3	1	1	8152	309	27		1022	1022	1022		dcf007684d8598380507220e605e8e2c_2567	7ef7127a3f11d26e5ed74c78ba404004_5276	Pseudomonase_1_04765
WP_001335023.1		hypothetical protein	3	3	1	1	8151	309	28		308	308	308		dcf007684d8598380507220e605e8e2c_2569	7ef7127a3f11d26e5ed74c78ba404004_5274	Pseudomonase_1_04766
ybjP		putative lipoprotein YbjP	3	4	1.34	1	7444				104	515	380		dcf007684d8598380507220e605e8e2c_1722	7ef7127a3f11d26e5ed74c78ba404004_6424	Pseudomonase_1_02054 Pseudomonase_1_02055
cobO		cob(I)yrinic acid a,c-diamide adenosyltransferase	3	3	1	1	8150	309	29		590	590	590		dcf007684d8598380507220e605e8e2c_2571	7ef7127a3f11d26e5ed74c78ba404004_5272	Pseudomonase_1_04767
yciK		YciK family oxidoreductase	3	3	1	1	8149	309	30		758	758	758		dcf007684d8598380507220e605e8e2c_2573	7ef7127a3f11d26e5ed74c78ba404004_5270	Pseudomonase_1_04768
sohB		protease SohB	3	3	1	1	8148	309	31		1049	1049	1049		dcf007684d8598380507220e605e8e2c_2575	7ef7127a3f11d26e5ed74c78ba404004_5268	Pseudomonase_1_04769
yciN		YciN family protein	3	3	1	1	9891	309	32		251	251	251		dcf007684d8598380507220e605e8e2c_2577	7ef7127a3f11d26e5ed74c78ba404004_5266	Pseudomonase_1_04770
topA		type I DNA topoisomerase	3	3	1	1	9892	309	33		2597	2597	2597		dcf007684d8598380507220e605e8e2c_2579	7ef7127a3f11d26e5ed74c78ba404004_5264	Pseudomonase_1_04771
cysB		HTH-type transcriptional regulator CysB	3	3	1	1	9893	309	34		974	974	974		dcf007684d8598380507220e605e8e2c_2581	7ef7127a3f11d26e5ed74c78ba404004_5262	Pseudomonase_1_04772
WP_001296035.1		hypothetical protein	3	3	1	1	9895	309	36		167	167	167		dcf007684d8598380507220e605e8e2c_2585	7ef7127a3f11d26e5ed74c78ba404004_5258	Pseudomonase_1_04774
WP_001310756.1		hypothetical protein	3	3	1	1	9896	309	37		95	95	95		dcf007684d8598380507220e605e8e2c_2587	7ef7127a3f11d26e5ed74c78ba404004_5256	Pseudomonase_1_04775
acnA		aconitate hydratase AcnA	3	3	1	1	9897	309	38		2675	2675	2675		dcf007684d8598380507220e605e8e2c_2589	7ef7127a3f11d26e5ed74c78ba404004_5254	Pseudomonase_1_04776
ribA		GTP cyclohydrolase II	3	3	1	1	9898	309	39		590	590	590		dcf007684d8598380507220e605e8e2c_2591	7ef7127a3f11d26e5ed74c78ba404004_5252	Pseudomonase_1_04777
folA		type 3 dihydrofolate reductase	3	3	1	1	4064	321	31		479	590	516		dcf007684d8598380507220e605e8e2c_94	7ef7127a3f11d26e5ed74c78ba404004_8203	Pseudomonase_1_05313
pgpB		phosphatidylglycerophosphatase B	3	3	1	1	9899	309	40		764	764	764		dcf007684d8598380507220e605e8e2c_2593	7ef7127a3f11d26e5ed74c78ba404004_5250	Pseudomonase_1_04778
lapA		lipopolysaccharide assembly protein LapA	3	3	1	1	9900	309	41		308	308	308		dcf007684d8598380507220e605e8e2c_2595	7ef7127a3f11d26e5ed74c78ba404004_5248	Pseudomonase_1_04779
lapB		lipopolysaccharide assembly protein LapB	3	3	1	1	9901	309	42		1169	1169	1169		dcf007684d8598380507220e605e8e2c_2597	7ef7127a3f11d26e5ed74c78ba404004_5246	Pseudomonase_1_04780
yciH		stress response translation initiation inhibitor YciH	3	3	1	1	9903	309	44		326	326	326		dcf007684d8598380507220e605e8e2c_2601	7ef7127a3f11d26e5ed74c78ba404004_5242	Pseudomonase_1_04782
osmB		osmotically-inducible lipoprotein OsmB	3	3	1	1	9904	309	45		218	218	218		dcf007684d8598380507220e605e8e2c_2603	7ef7127a3f11d26e5ed74c78ba404004_5240	Pseudomonase_1_04783
yciT		Glucitol operon repressor	3	3	1	1	9905	309	46		749	749	749		dcf007684d8598380507220e605e8e2c_2605	7ef7127a3f11d26e5ed74c78ba404004_5238	Pseudomonase_1_04784
WP_001288368.1		hypothetical protein	3	3	1	1	9906	309	47		173	173	173		dcf007684d8598380507220e605e8e2c_2607	7ef7127a3f11d26e5ed74c78ba404004_5236	Pseudomonase_1_04785
pdeR		cyclic di-GMP phosphodiesterase	3	3	1	1	9907	309	49		1985	1985	1985		dcf007684d8598380507220e605e8e2c_2611	7ef7127a3f11d26e5ed74c78ba404004_5232	Pseudomonase_1_04786
rnb		exoribonuclease II	3	3	1	1	9908	309	50		1934	1934	1934		dcf007684d8598380507220e605e8e2c_2615	7ef7127a3f11d26e5ed74c78ba404004_5228	Pseudomonase_1_04787
djlA		co-chaperone DjlA	3	3	1	1	4055	321	40		815	881	837		dcf007684d8598380507220e605e8e2c_112	7ef7127a3f11d26e5ed74c78ba404004_8185	Pseudomonase_1_05304
yciW		CMD domain-containing protein	3	3	1	1	9909	309	51		1127	1127	1127		dcf007684d8598380507220e605e8e2c_2617	7ef7127a3f11d26e5ed74c78ba404004_5226	Pseudomonase_1_04788
fabI		enoyl-ACP reductase FabI	3	3	1	1	9910	309	52		788	788	788		dcf007684d8598380507220e605e8e2c_2619	7ef7127a3f11d26e5ed74c78ba404004_5224	Pseudomonase_1_04789
WP_001298113.1		TetR/AcrR family transcriptional regulator	3	3	1	1	9911	309	53		566	566	566		dcf007684d8598380507220e605e8e2c_2621	7ef7127a3f11d26e5ed74c78ba404004_5222	Pseudomonase_1_04790
WP_000873803.1		efflux RND transporter periplasmic adaptor subunit	3	3	1	1	9912	309	54		1121	1121	1121		dcf007684d8598380507220e605e8e2c_2623	7ef7127a3f11d26e5ed74c78ba404004_5220	Pseudomonase_1_04791
WP_000492814.1		efflux RND transporter permease subunit	3	3	1	1	9913	309	55		3107	3107	3107		dcf007684d8598380507220e605e8e2c_2625	7ef7127a3f11d26e5ed74c78ba404004_5218	Pseudomonase_1_04792
WP_000946226.1		TolC family protein	3	3	1	1	9914	309	56		1373	1373	1373		dcf007684d8598380507220e605e8e2c_2627	7ef7127a3f11d26e5ed74c78ba404004_5216	Pseudomonase_1_04793
WP_000135020.1		multidrug effflux MFS transporter	3	3	1	1	9915	309	57		1163	1163	1163		dcf007684d8598380507220e605e8e2c_2629	7ef7127a3f11d26e5ed74c78ba404004_5214	Pseudomonase_1_04794
sapF		peptide ABC transporter ATP-binding protein SapF	3	3	1	1	9916	309	58		806	806	806		dcf007684d8598380507220e605e8e2c_2631	7ef7127a3f11d26e5ed74c78ba404004_5212	Pseudomonase_1_04795
sapD		peptide ABC transporter ATP-binding protein SapD	3	3	1	1	9917	309	59		992	992	992		dcf007684d8598380507220e605e8e2c_2633	7ef7127a3f11d26e5ed74c78ba404004_5210	Pseudomonase_1_04796
sapC		peptide ABC transporter permease SapC	3	3	1	1	9918	309	60		890	890	890		dcf007684d8598380507220e605e8e2c_2635	7ef7127a3f11d26e5ed74c78ba404004_5208	Pseudomonase_1_04797
secM		secA translation cis-regulator SecM	3	3	1	1	10568	562	1		512	587	537		dcf007684d8598380507220e605e8e2c_201	7ef7127a3f11d26e5ed74c78ba404004_8096	Pseudomonase_1_05264
sapB		putrescine ABC transporter permease SapB	3	3	1	1	9919	309	61		965	965	965		dcf007684d8598380507220e605e8e2c_2637	7ef7127a3f11d26e5ed74c78ba404004_5206	Pseudomonase_1_04798
sapA		peptide ABC transporter substrate-binding protein SapA	3	3	1	1	9920	309	62		1643	1643	1643		dcf007684d8598380507220e605e8e2c_2639	7ef7127a3f11d26e5ed74c78ba404004_5204	Pseudomonase_1_04799
ymjA		YmjA family protein	3	3	1	1	9922	309	63		245	245	245		dcf007684d8598380507220e605e8e2c_2641	7ef7127a3f11d26e5ed74c78ba404004_5202	Pseudomonase_1_04800
pspF		phage shock protein operon transcriptional activator	3	3	1	1	9924	309	65		977	977	977		dcf007684d8598380507220e605e8e2c_2645	7ef7127a3f11d26e5ed74c78ba404004_5198	Pseudomonase_1_04802
pspA		phage shock protein PspA	3	3	1	1	9925	309	66		668	668	668		dcf007684d8598380507220e605e8e2c_2647	7ef7127a3f11d26e5ed74c78ba404004_5196	Pseudomonase_1_04803
pspB		envelope stress response membrane protein PspB	3	3	1	1	9926	309	67		224	224	224		dcf007684d8598380507220e605e8e2c_2649	7ef7127a3f11d26e5ed74c78ba404004_5194	Pseudomonase_1_04804
pspC		envelope stress response membrane protein PspC	3	3	1	1	9927	309	68		359	359	359		dcf007684d8598380507220e605e8e2c_2651	7ef7127a3f11d26e5ed74c78ba404004_5192	Pseudomonase_1_04805
pspD		phage shock protein PspD	3	3	1	1	9928	309	69		221	221	221		dcf007684d8598380507220e605e8e2c_2653	7ef7127a3f11d26e5ed74c78ba404004_5190	Pseudomonase_1_04806
pspE		thiosulfate sulfurtransferase PspE	3	3	1	1	9929	309	70		314	314	314		dcf007684d8598380507220e605e8e2c_2655	7ef7127a3f11d26e5ed74c78ba404004_5188	Pseudomonase_1_04807
pcnB		polynucleotide adenylyltransferase PcnB	3	3	1	1	10581	361	2		1364	1397	1386		dcf007684d8598380507220e605e8e2c_305	7ef7127a3f11d26e5ed74c78ba404004_7992	Pseudomonase_1_05215
ycjM		glucosylglycerate phosphorylase	3	3	1	1	9930	309	71		1679	1679	1679		dcf007684d8598380507220e605e8e2c_2657	7ef7127a3f11d26e5ed74c78ba404004_5186	Pseudomonase_1_04808
ycjN		ABC transporter substrate-binding protein	3	3	1	1	9931	309	72		1292	1292	1292		dcf007684d8598380507220e605e8e2c_2659	7ef7127a3f11d26e5ed74c78ba404004_5184	Pseudomonase_1_04809
ycjO		sugar ABC transporter permease	3	3	1	1	9932	309	73		881	881	881		dcf007684d8598380507220e605e8e2c_2661	7ef7127a3f11d26e5ed74c78ba404004_5182	Pseudomonase_1_04810
ycjP		carbohydrate ABC transporter permease	3	3	1	1	9933	309	74		842	842	842		dcf007684d8598380507220e605e8e2c_2663	7ef7127a3f11d26e5ed74c78ba404004_5180	Pseudomonase_1_04811
ycjQ		zinc-binding alcohol dehydrogenase	3	3	1	1	9934	309	75		1052	1052	1052		dcf007684d8598380507220e605e8e2c_2665	7ef7127a3f11d26e5ed74c78ba404004_5178	Pseudomonase_1_04812
ycjR		sugar phosphate isomerase/epimerase	3	3	1	1	9935	309	76		788	788	788		dcf007684d8598380507220e605e8e2c_2667	7ef7127a3f11d26e5ed74c78ba404004_5176	Pseudomonase_1_04813
ycjS		Gfo/Idh/MocA family oxidoreductase	3	3	1	1	9936	309	77		1055	1055	1055		dcf007684d8598380507220e605e8e2c_2669	7ef7127a3f11d26e5ed74c78ba404004_5174	Pseudomonase_1_04814
ycjT		kojibiose phosphorylase	3	3	1	1	9937	309	96		2267	2267	2267		dcf007684d8598380507220e605e8e2c_2671	7ef7127a3f11d26e5ed74c78ba404004_5172	Pseudomonase_1_04815
pgmB		beta-phosphoglucomutase	3	3	1	1	9938	309	95		659	659	659		dcf007684d8598380507220e605e8e2c_2673	7ef7127a3f11d26e5ed74c78ba404004_5170	Pseudomonase_1_04816
ompG		monomeric porin OmpG	3	3	1	1	9939	309	94		905	905	905		dcf007684d8598380507220e605e8e2c_2677	7ef7127a3f11d26e5ed74c78ba404004_5166	Pseudomonase_1_04819
gluQRS		tRNA glutamyl-Q(34) synthetase GluQRS	3	3	1	1	10580	361	1		896	926	906		dcf007684d8598380507220e605e8e2c_307	7ef7127a3f11d26e5ed74c78ba404004_7990	Pseudomonase_1_05214
ycjW		LacI family transcriptional regulator	3	3	1	1	9940	309	92		998	998	998		dcf007684d8598380507220e605e8e2c_2679	7ef7127a3f11d26e5ed74c78ba404004_5164	Pseudomonase_1_04820
ycjX		YcjX family protein	3	3	1	1	9941	309	91		1397	1397	1397		dcf007684d8598380507220e605e8e2c_2681	7ef7127a3f11d26e5ed74c78ba404004_5162	Pseudomonase_1_04821
ycjF		YcjF family protein	3	3	1	1	9942	309	90		1061	1061	1061		dcf007684d8598380507220e605e8e2c_2683	7ef7127a3f11d26e5ed74c78ba404004_5160	Pseudomonase_1_04822
tyrR		transcriptional regulator TyrR	3	3	1	1	9943	309	89		1541	1541	1541		dcf007684d8598380507220e605e8e2c_2685	7ef7127a3f11d26e5ed74c78ba404004_5158	Pseudomonase_1_04823
tpx		thiol peroxidase	3	3	1	1	9944	309	88		506	506	506		dcf007684d8598380507220e605e8e2c_2687	7ef7127a3f11d26e5ed74c78ba404004_5156	Pseudomonase_1_04824
ycjG		L-Ala-D/L-Glu epimerase	3	3	1	1	9945	309	87		965	965	965		dcf007684d8598380507220e605e8e2c_2689	7ef7127a3f11d26e5ed74c78ba404004_5154	Pseudomonase_1_04825
mpaA		murein tripeptide amidase MpaA	3	3	1	1	9946	309	86		728	728	728		dcf007684d8598380507220e605e8e2c_2691	7ef7127a3f11d26e5ed74c78ba404004_5152	Pseudomonase_1_04826
WP_000800177.1		SDR family oxidoreductase	3	3	1	1	9947	309	85		638	638	638		dcf007684d8598380507220e605e8e2c_2693	7ef7127a3f11d26e5ed74c78ba404004_5150	Pseudomonase_1_04827
ycjY		alpha/beta hydrolase	3	3	1	1	9948	309	84		920	920	920		dcf007684d8598380507220e605e8e2c_2695	7ef7127a3f11d26e5ed74c78ba404004_5148	Pseudomonase_1_04828
pgrR		DNA-binding transcriptional regulator PgrR	3	3	1	1	9949	309	83		899	899	899		dcf007684d8598380507220e605e8e2c_2697	7ef7127a3f11d26e5ed74c78ba404004_5146	Pseudomonase_1_04829
ispU		(2E,6E)-farnesyl-diphosphate-specific ditrans,polycis-undecaprenyl-diphosphate synthase	3	3	1	1	5424	436	5		689	758	735		dcf007684d8598380507220e605e8e2c_367	7ef7127a3f11d26e5ed74c78ba404004_7930	Pseudomonase_1_05186
mppA		murein tripeptide ABC transporter substrate-binding protein MppA	3	3	1	1	9950	309	82		1613	1613	1613		dcf007684d8598380507220e605e8e2c_2699	7ef7127a3f11d26e5ed74c78ba404004_5144	Pseudomonase_1_04830
ynaI		low conductance mechanosensitive channel YnaI	3	3	1	1	9951	309	81		1031	1031	1031		dcf007684d8598380507220e605e8e2c_2701	7ef7127a3f11d26e5ed74c78ba404004_5142	Pseudomonase_1_04831
ynaJ		DUF2534 family protein	3	3	1	1	9952	309	80		257	257	257		dcf007684d8598380507220e605e8e2c_2703	7ef7127a3f11d26e5ed74c78ba404004_5140	Pseudomonase_1_04832
uspE		universal stress protein UspE	3	3	1	1	9953	309	79		950	950	950		dcf007684d8598380507220e605e8e2c_2705	7ef7127a3f11d26e5ed74c78ba404004_5138	Pseudomonase_1_04833
ogt		methylated-DNA--[protein]-cysteine S-methyltransferase	3	3	1	1	9957	307	295		515	515	515		dcf007684d8598380507220e605e8e2c_2709	7ef7127a3f11d26e5ed74c78ba404004_5134	Pseudomonase_1_04835
WP_000587194.1		HlyD family secretion protein	3	3	1	1	9954	307	297		1028	1028	1028		dcf007684d8598380507220e605e8e2c_2715	7ef7127a3f11d26e5ed74c78ba404004_5128	Pseudomonase_1_04837
WP_000987379.1		DHA2 family efflux MFS transporter permease subunit	3	3	1	1	2699	307	298		1511	1514	1513		dcf007684d8598380507220e605e8e2c_2717	7ef7127a3f11d26e5ed74c78ba404004_5126	Pseudomonase_1_04838
smrA		DNA endonuclease SmrA	3	3	1	1	2700	307	299		563	563	563		dcf007684d8598380507220e605e8e2c_2719	7ef7127a3f11d26e5ed74c78ba404004_5124	Pseudomonase_1_04839
dgcM		diguanylate cyclase DgcM	3	3	1	1	2701	307	300		1232	1232	1232		dcf007684d8598380507220e605e8e2c_2721	7ef7127a3f11d26e5ed74c78ba404004_5122	Pseudomonase_1_04840
yafD		endonuclease/exonuclease/phosphatase family protein	3	3	1	1	5353	336	32		800	824	808		dcf007684d8598380507220e605e8e2c_427	7ef7127a3f11d26e5ed74c78ba404004_7852	Pseudomonase_1_08849
zntB		zinc transporter ZntB	3	3	1	1	2703	307	302		983	983	983		dcf007684d8598380507220e605e8e2c_2725	7ef7127a3f11d26e5ed74c78ba404004_5118	Pseudomonase_1_04841
dbpA		ATP-dependent RNA helicase DbpA	3	3	1	1	2704	307	303		1373	1373	1373		dcf007684d8598380507220e605e8e2c_2727	7ef7127a3f11d26e5ed74c78ba404004_5116	Pseudomonase_1_04842
mltD		murein transglycosylase D	3	3	1	1	5350	336	30		1220	1358	1312		dcf007684d8598380507220e605e8e2c_431	7ef7127a3f11d26e5ed74c78ba404004_7848	Pseudomonase_1_08851
uspF		universal stress protein UspF	3	3	1	1	2716	307	315		434	434	434		dcf007684d8598380507220e605e8e2c_2751	7ef7127a3f11d26e5ed74c78ba404004_5106	Pseudomonase_1_04845
ompN		porin OmpN	3	3	1	1	2717	307	316		1133	1133	1133		dcf007684d8598380507220e605e8e2c_2753	7ef7127a3f11d26e5ed74c78ba404004_5104	Pseudomonase_1_04846
nifJ		pyruvate:ferredoxin (flavodoxin) oxidoreductase	3	3	1	1	2718	307	317		3524	3524	3524		dcf007684d8598380507220e605e8e2c_2755	7ef7127a3f11d26e5ed74c78ba404004_5102	Pseudomonase_1_04847
ydbJ		DUF333 domain-containing protein	3	3	1	1	2719	307	318		266	266	266		dcf007684d8598380507220e605e8e2c_2757	7ef7127a3f11d26e5ed74c78ba404004_5100	Pseudomonase_1_04848
hslJ		heat shock protein HslJ	3	3	1	1	2720	307	319		422	422	422		dcf007684d8598380507220e605e8e2c_2759	7ef7127a3f11d26e5ed74c78ba404004_5098	Pseudomonase_1_04849
ldhA		D-lactate dehydrogenase	3	3	1	1	2721	307	320		989	989	989		dcf007684d8598380507220e605e8e2c_2761	7ef7127a3f11d26e5ed74c78ba404004_5096	Pseudomonase_1_04850
ydbH		YdbH family protein	3	3	1	1	2722	307	321		2639	2639	2639		dcf007684d8598380507220e605e8e2c_2763	7ef7127a3f11d26e5ed74c78ba404004_5094	Pseudomonase_1_04851
ynbE		YnbE family lipoprotein	3	3	1	1	2723	307	322		185	185	185		dcf007684d8598380507220e605e8e2c_2765	7ef7127a3f11d26e5ed74c78ba404004_5092	Pseudomonase_1_04852
ydbL		YdbL family protein	3	3	1	1	2724	307	323		326	326	326		dcf007684d8598380507220e605e8e2c_2767	7ef7127a3f11d26e5ed74c78ba404004_5090	Pseudomonase_1_04853
WP_000227712.1		hypothetical protein	3	3	1	1	5276	354	5		269	503	425		dcf007684d8598380507220e605e8e2c_488	7ef7127a3f11d26e5ed74c78ba404004_7791	Pseudomonase_1_08882
pdxI		pyridoxine 4-dehydrogenase	3	3	1	1	2726	307	325		860	860	860		dcf007684d8598380507220e605e8e2c_2773	7ef7127a3f11d26e5ed74c78ba404004_5086	Pseudomonase_1_04855
ynbA		CDP-alcohol phosphatidyltransferase family protein	3	3	1	1	2727	307	326		605	605	605		dcf007684d8598380507220e605e8e2c_2775	7ef7127a3f11d26e5ed74c78ba404004_5084	Pseudomonase_1_04856
ynbB		phosphatidate cytidylyltransferase	3	3	1	1	2728	307	327		896	896	896		dcf007684d8598380507220e605e8e2c_2777	7ef7127a3f11d26e5ed74c78ba404004_5082	Pseudomonase_1_04857
ynbC		bifunctional alpha/beta hydrolase/class I SAM-dependent methyltransferase	3	3	1	1	2729	307	328		1757	1757	1757		dcf007684d8598380507220e605e8e2c_2779	7ef7127a3f11d26e5ed74c78ba404004_5080	Pseudomonase_1_04858
azoR		FMN-dependent NADH-azoreductase	3	3	1	1	2731	307	330		605	605	605		dcf007684d8598380507220e605e8e2c_2783	7ef7127a3f11d26e5ed74c78ba404004_5076	Pseudomonase_1_04860
hrpA		ATP-dependent RNA helicase HrpA	3	3	1	1	2732	307	331		3902	3902	3902		dcf007684d8598380507220e605e8e2c_2785	7ef7127a3f11d26e5ed74c78ba404004_5074	Pseudomonase_1_04861
ydcF		YdcF family protein	3	3	1	1	2733	307	332		800	800	800		dcf007684d8598380507220e605e8e2c_2787	7ef7127a3f11d26e5ed74c78ba404004_5072	Pseudomonase_1_04862
aldA		aldehyde dehydrogenase	3	3	1	1	2734	307	333		1439	1439	1439		dcf007684d8598380507220e605e8e2c_2789	7ef7127a3f11d26e5ed74c78ba404004_5070	Pseudomonase_1_04863
gap		type I glyceraldehyde-3-phosphate dehydrogenase	3	3	1	1	2735	307	334		1001	1001	1001		dcf007684d8598380507220e605e8e2c_2791	7ef7127a3f11d26e5ed74c78ba404004_5068	Pseudomonase_1_04864
cybB		cytochrome b561	3	3	1	1	2736	307	335		530	530	530		dcf007684d8598380507220e605e8e2c_2793	7ef7127a3f11d26e5ed74c78ba404004_5066	Pseudomonase_1_04865
group_68		IS4 family transposase	3	4	1.34	1	8595				410	1205	927		dcf007684d8598380507220e605e8e2c_2498	7ef7127a3f11d26e5ed74c78ba404004_5343	Pseudomonase_1_04732 Pseudomonase_1_09494
lafU		putative lateral flagellar export/assembly protein LafU	3	3	1	1	5287	354	17		635	785	735		dcf007684d8598380507220e605e8e2c_512	7ef7127a3f11d26e5ed74c78ba404004_7693	Pseudomonase_1_08893
WP_000731859.1		hypothetical protein	3	3	1	1	2737	307	336		173	173	173		dcf007684d8598380507220e605e8e2c_2795	7ef7127a3f11d26e5ed74c78ba404004_5064	Pseudomonase_1_04866
ydcI		LysR substrate-binding domain-containing protein	3	3	1	1	2742	307	292		923	923	923		dcf007684d8598380507220e605e8e2c_2805	7ef7127a3f11d26e5ed74c78ba404004_5056	Pseudomonase_1_04871
ydcJ		VOC family protein	3	3	1	1	2743	307	289		1343	1343	1343		dcf007684d8598380507220e605e8e2c_2807	7ef7127a3f11d26e5ed74c78ba404004_5054	Pseudomonase_1_04872
ydcH		YdcH family protein	3	3	1	1	2745	307	287		224	224	224		dcf007684d8598380507220e605e8e2c_2811	7ef7127a3f11d26e5ed74c78ba404004_5050	Pseudomonase_1_04874
rimL		50S ribosomal protein L7/L12-serine acetyltransferase	3	3	1	1	2746	307	286		539	539	539		dcf007684d8598380507220e605e8e2c_2813	7ef7127a3f11d26e5ed74c78ba404004_5048	Pseudomonase_1_04875
ydcK		YdcK family protein	3	3	1	1	2747	307	285		980	980	980		dcf007684d8598380507220e605e8e2c_2815	7ef7127a3f11d26e5ed74c78ba404004_5046	Pseudomonase_1_04876
tehA		dicarboxylate transporter/tellurite-resistance protein TehA	3	3	1	1	2748	307	284		992	992	992		dcf007684d8598380507220e605e8e2c_2817	7ef7127a3f11d26e5ed74c78ba404004_5044	Pseudomonase_1_04877
tehB		tellurite resistance methyltransferase TehB	3	3	1	1	2749	307	283		593	593	593		dcf007684d8598380507220e605e8e2c_2819	7ef7127a3f11d26e5ed74c78ba404004_5042	Pseudomonase_1_04878
yafP		GNAT family N-acetyltransferase	3	3	1	1	5291	354	13		374	452	426		dcf007684d8598380507220e605e8e2c_520	7ef7127a3f11d26e5ed74c78ba404004_7685	Pseudomonase_1_08897
ydcL		DUF3313 domain-containing protein	3	3	1	1	2750	307	282		668	668	668		dcf007684d8598380507220e605e8e2c_2821	7ef7127a3f11d26e5ed74c78ba404004_5040	Pseudomonase_1_04879
ydcO		BenE family transporter YdcO	3	3	1	1	2751	307	281		1172	1172	1172		dcf007684d8598380507220e605e8e2c_2823	7ef7127a3f11d26e5ed74c78ba404004_5038	Pseudomonase_1_04880
sutR		DNA-binding transcriptional regulator SutR	3	3	1	1	2752	307	280		536	536	536		dcf007684d8598380507220e605e8e2c_2825	7ef7127a3f11d26e5ed74c78ba404004_5036	Pseudomonase_1_04881
ydcR		PLP-dependent aminotransferase family protein	3	3	1	1	2756	307	277		1406	1406	1406		dcf007684d8598380507220e605e8e2c_2833	7ef7127a3f11d26e5ed74c78ba404004_5028	Pseudomonase_1_04884
ydcS		ABC transporter substrate-binding protein	3	3	1	1	2757	307	275		1145	1145	1145		dcf007684d8598380507220e605e8e2c_2835	7ef7127a3f11d26e5ed74c78ba404004_5026	Pseudomonase_1_04885
ydcT		ABC transporter ATP-binding protein	3	3	1	1	2758	307	274		1013	1013	1013		dcf007684d8598380507220e605e8e2c_2837	7ef7127a3f11d26e5ed74c78ba404004_5024	Pseudomonase_1_04886
ydcU		ABC transporter permease	3	3	1	1	2759	307	273		941	941	941		dcf007684d8598380507220e605e8e2c_2839	7ef7127a3f11d26e5ed74c78ba404004_5022	Pseudomonase_1_04887
ydcV		ABC transporter permease	3	3	1	1	2760	307	272		794	794	794		dcf007684d8598380507220e605e8e2c_2841	7ef7127a3f11d26e5ed74c78ba404004_5020	Pseudomonase_1_04888
patD		aminobutyraldehyde dehydrogenase	3	3	1	1	2761	307	271		1424	1424	1424		dcf007684d8598380507220e605e8e2c_2843	7ef7127a3f11d26e5ed74c78ba404004_5018	Pseudomonase_1_04889
WP_001451890.1		hypothetical protein	3	4	1.34	1	5502				116	227	197		dcf007684d8598380507220e605e8e2c_549	7ef7127a3f11d26e5ed74c78ba404004_7656 7ef7127a3f11d26e5ed74c78ba404004_6348	Pseudomonase_1_08911
ortT		orphan toxin OrtT	3	3	1	1	2763	307	269		173	173	173		dcf007684d8598380507220e605e8e2c_2847	7ef7127a3f11d26e5ed74c78ba404004_5014	Pseudomonase_1_04890
ydcY		YdcY family protein	3	3	1	1	2764	307	268		233	233	233		dcf007684d8598380507220e605e8e2c_2849	7ef7127a3f11d26e5ed74c78ba404004_5012	Pseudomonase_1_04891
ydcZ		DMT family transporter	3	3	1	1	2765	307	267		449	449	449		dcf007684d8598380507220e605e8e2c_2851	7ef7127a3f11d26e5ed74c78ba404004_5010	Pseudomonase_1_04892
mddA		L-methionine sulfoximine/L-methionine sulfone acetyltransferase	3	3	1	1	2766	307	266		518	518	518		dcf007684d8598380507220e605e8e2c_2853	7ef7127a3f11d26e5ed74c78ba404004_5008	Pseudomonase_1_04893
yncD		TonB-dependent receptor	3	3	1	1	2767	307	265		2102	2102	2102		dcf007684d8598380507220e605e8e2c_2857	7ef7127a3f11d26e5ed74c78ba404004_5004	Pseudomonase_1_04894
yncE		YncE family protein	3	3	1	1	2768	307	264		1061	1061	1061		dcf007684d8598380507220e605e8e2c_2859	7ef7127a3f11d26e5ed74c78ba404004_5002	Pseudomonase_1_04895
ansP		L-asparagine permease	3	3	1	1	2769	307	263		1499	1499	1499		dcf007684d8598380507220e605e8e2c_2861	7ef7127a3f11d26e5ed74c78ba404004_5000	Pseudomonase_1_04896
WP_001127493.1		type VI secretion system PAAR protein	3	3	1	1	2772	307	262		284	284	284		dcf007684d8598380507220e605e8e2c_2865	7ef7127a3f11d26e5ed74c78ba404004_4996	Pseudomonase_1_04899
WP_000282079.1		inovirus-type Gp2 protein	3	4	1.34	1	5504				563	563	563		dcf007684d8598380507220e605e8e2c_553	7ef7127a3f11d26e5ed74c78ba404004_7652 7ef7127a3f11d26e5ed74c78ba404004_6344	Pseudomonase_1_08913
WP_000342574.1		peptidase M35	3	3	1	1	2774	307	261		761	761	761		dcf007684d8598380507220e605e8e2c_2869	7ef7127a3f11d26e5ed74c78ba404004_4992	Pseudomonase_1_09546
WP_001304381.1		hypothetical protein	3	3	1	1	2775	307	259		467	467	467		dcf007684d8598380507220e605e8e2c_2873	7ef7127a3f11d26e5ed74c78ba404004_4988	Pseudomonase_1_09547
WP_000470661.1		hypothetical protein	3	3	1	1	2776	307	257		215	215	215		dcf007684d8598380507220e605e8e2c_2877	7ef7127a3f11d26e5ed74c78ba404004_4984	Pseudomonase_1_09548
yddH		flavin reductase family protein	3	3	1	1	2777	307	256		569	569	569		dcf007684d8598380507220e605e8e2c_2879	7ef7127a3f11d26e5ed74c78ba404004_4982	Pseudomonase_1_09549
nhoA		N-hydroxyarylamine O-acetyltransferase	3	3	1	1	2778	307	255		845	845	845		dcf007684d8598380507220e605e8e2c_2881	7ef7127a3f11d26e5ed74c78ba404004_4980	Pseudomonase_1_09550
yddE		PhzF family isomerase	3	3	1	1	2779	307	254		893	893	893		dcf007684d8598380507220e605e8e2c_2883	7ef7127a3f11d26e5ed74c78ba404004_4978	Pseudomonase_1_09551
narI		respiratory nitrate reductase subunit gamma	3	3	1	1	2780	307	253		680	680	680		dcf007684d8598380507220e605e8e2c_2885	7ef7127a3f11d26e5ed74c78ba404004_4976	Pseudomonase_1_09552
narW		nitrate reductase molybdenum cofactor assembly chaperone	3	3	1	1	2781	307	252		695	695	695		dcf007684d8598380507220e605e8e2c_2887	7ef7127a3f11d26e5ed74c78ba404004_4974	Pseudomonase_1_09553
WP_089644009.1		IS3 family transposase	3	3	1	1	5505	411	2		1251	1286	1262		dcf007684d8598380507220e605e8e2c_555	7ef7127a3f11d26e5ed74c78ba404004_7649	Pseudomonase_1_08914
group_6840	narH	nitrate reductase subunit beta	3	3	1	1	2782	307	251		1544	1544	1544		dcf007684d8598380507220e605e8e2c_2889	7ef7127a3f11d26e5ed74c78ba404004_4972	Pseudomonase_1_09554
narZ		nitrate reductase Z subunit alpha	3	3	1	1	2783	307	250		3740	3740	3740		dcf007684d8598380507220e605e8e2c_2891	7ef7127a3f11d26e5ed74c78ba404004_4970	Pseudomonase_1_09555
narU		nitrate/nitrite transporter NarU	3	3	1	1	2784	307	249		1388	1388	1388		dcf007684d8598380507220e605e8e2c_2893	7ef7127a3f11d26e5ed74c78ba404004_4968	Pseudomonase_1_09556
fdnH		formate dehydrogenase N subunit beta	3	3	1	1	2787	307	247		884	884	884		dcf007684d8598380507220e605e8e2c_2899	7ef7127a3f11d26e5ed74c78ba404004_4962	Pseudomonase_1_09560
fdnI		formate dehydrogenase-N subunit gamma	3	3	1	1	2788	307	245		653	653	653		dcf007684d8598380507220e605e8e2c_2901	7ef7127a3f11d26e5ed74c78ba404004_4960	Pseudomonase_1_09561
yddM		HigA family addiction module antitoxin	3	3	1	1	2789	307	244		284	284	284		dcf007684d8598380507220e605e8e2c_2903	7ef7127a3f11d26e5ed74c78ba404004_4958	Pseudomonase_1_09562
WP_000605675.1		type II toxin-antitoxin system RelE/ParE family toxin	3	3	1	1	2790	307	243		278	278	278		dcf007684d8598380507220e605e8e2c_2905	7ef7127a3f11d26e5ed74c78ba404004_4956	Pseudomonase_1_09563
adhP		alcohol dehydrogenase AdhP	3	3	1	1	2791	307	241		1010	1010	1010		dcf007684d8598380507220e605e8e2c_2907	7ef7127a3f11d26e5ed74c78ba404004_4954	Pseudomonase_1_09565
maeA		malate dehydrogenase	3	3	1	1	2792	307	240		1697	1697	1697		dcf007684d8598380507220e605e8e2c_2909	7ef7127a3f11d26e5ed74c78ba404004_4952	Pseudomonase_1_09566
sra		stationary-phase-induced ribosome-associated protein	3	3	1	1	2793	307	239		137	137	137		dcf007684d8598380507220e605e8e2c_2911	7ef7127a3f11d26e5ed74c78ba404004_4950	Pseudomonase_1_09567
WP_024174313.1		DUF4942 domain-containing protein	3	3	1	1	5507	411	4		824	854	844		dcf007684d8598380507220e605e8e2c_562	7ef7127a3f11d26e5ed74c78ba404004_7519	Pseudomonase_1_09143
bdm		biofilm-dependent modulation protein	3	3	1	1	2794	307	238		215	215	215		dcf007684d8598380507220e605e8e2c_2913	7ef7127a3f11d26e5ed74c78ba404004_4948	Pseudomonase_1_09568
osmC		peroxiredoxin OsmC	3	3	1	1	2795	307	237		431	431	431		dcf007684d8598380507220e605e8e2c_2915	7ef7127a3f11d26e5ed74c78ba404004_4946	Pseudomonase_1_09569
dosP		oxygen-sensing cyclic-di-GMP phosphodiesterase	3	3	1	1	2796	307	236		2399	2399	2399		dcf007684d8598380507220e605e8e2c_2917	7ef7127a3f11d26e5ed74c78ba404004_4944	Pseudomonase_1_09570
digH		glycoside hydrolase family 10 protein	3	3	1	1	2798	307	235		1319	1319	1319		dcf007684d8598380507220e605e8e2c_2921	7ef7127a3f11d26e5ed74c78ba404004_4940	Pseudomonase_1_09571
gadC		acid resistance gamma-aminobutyrate antiporter GadC	3	3	1	1	2799	307	234		1535	1535	1535		dcf007684d8598380507220e605e8e2c_2923	7ef7127a3f11d26e5ed74c78ba404004_4938	Pseudomonase_1_09572
pqqL		insulinase family protein	3	3	1	1	2801	307	232		2783	2783	2783		dcf007684d8598380507220e605e8e2c_2927	7ef7127a3f11d26e5ed74c78ba404004_4934	Pseudomonase_1_10004
yddB		TonB-dependent receptor plug domain-containing protein	3	3	1	1	2802	307	231		2372	2372	2372		dcf007684d8598380507220e605e8e2c_2929	7ef7127a3f11d26e5ed74c78ba404004_4932	Pseudomonase_1_10005
yddA		ABC transporter ATP-binding protein/permease	3	3	1	1	2803	307	230		1685	1685	1685		dcf007684d8598380507220e605e8e2c_2931	7ef7127a3f11d26e5ed74c78ba404004_4930	Pseudomonase_1_10006
WP_001059463.1		MarR family transcriptional regulator	3	3	1	1	4841	411	7		494	524	504		dcf007684d8598380507220e605e8e2c_568	7ef7127a3f11d26e5ed74c78ba404004_7513	Pseudomonase_1_09140
ydeM		anaerobic sulfatase maturase	3	3	1	1	2805	307	229		1157	1157	1157		dcf007684d8598380507220e605e8e2c_2935	7ef7127a3f11d26e5ed74c78ba404004_4926	Pseudomonase_1_10007
ydeN		sulfatase	3	3	1	1	2806	307	228		1682	1682	1682		dcf007684d8598380507220e605e8e2c_2937	7ef7127a3f11d26e5ed74c78ba404004_4924	Pseudomonase_1_10008
ydeO		acid stress response transcriptional regulator YdeO	3	3	1	1	2807	307	227		761	761	761		dcf007684d8598380507220e605e8e2c_2939	7ef7127a3f11d26e5ed74c78ba404004_4922	Pseudomonase_1_10009
safA		two-component system connector SafA	3	3	1	1	2808	307	226		197	197	197		dcf007684d8598380507220e605e8e2c_2941	7ef7127a3f11d26e5ed74c78ba404004_4920	Pseudomonase_1_10010
hipA		type II toxin-antitoxin system serine/threonine protein kinase toxin HipA	3	3	1	1	2675	307	218		1322	1322	1322		dcf007684d8598380507220e605e8e2c_2977	7ef7127a3f11d26e5ed74c78ba404004_4860	Pseudomonase_1_01321
tam		trans-aconitate 2-methyltransferase	3	3	1	1	2673	307	214		758	758	758		dcf007684d8598380507220e605e8e2c_2981	7ef7127a3f11d26e5ed74c78ba404004_4856	Pseudomonase_1_01319
uxaB		tagaturonate reductase	3	3	1	1	2671	307	212		1451	1451	1451		dcf007684d8598380507220e605e8e2c_2985	7ef7127a3f11d26e5ed74c78ba404004_4852	Pseudomonase_1_01317
lacZ		beta-galactosidase	3	3	1	1	2497	17	23		3074	3074	3074		dcf007684d8598380507220e605e8e2c_704	7ef7127a3f11d26e5ed74c78ba404004_7373	Pseudomonase_1_10170
WP_237808918.1		GGDEF domain-containing protein	3	3	1	1	2670	307	211		1418	1418	1418		dcf007684d8598380507220e605e8e2c_2987	7ef7127a3f11d26e5ed74c78ba404004_4850	Pseudomonase_1_01316
yneG		DUF4186 domain-containing protein	3	3	1	1	2669	307	210		359	359	359		dcf007684d8598380507220e605e8e2c_2989	7ef7127a3f11d26e5ed74c78ba404004_4848	Pseudomonase_1_01315
glsB		glutaminase B	3	3	1	1	2668	307	209		926	926	926		dcf007684d8598380507220e605e8e2c_2991	7ef7127a3f11d26e5ed74c78ba404004_4846	Pseudomonase_1_01314
sad		succinate-semialdehyde dehydrogenase	3	3	1	1	2667	307	208		1388	1388	1388		dcf007684d8598380507220e605e8e2c_2993	7ef7127a3f11d26e5ed74c78ba404004_4844	Pseudomonase_1_01313
yneJ		LysR family transcriptional regulator	3	3	1	1	2666	307	207		881	881	881		dcf007684d8598380507220e605e8e2c_2995	7ef7127a3f11d26e5ed74c78ba404004_4842	Pseudomonase_1_01312
ydeA		L-arabinose MFS transporter	3	3	1	1	2664	307	206		1190	1190	1190		dcf007684d8598380507220e605e8e2c_2999	7ef7127a3f11d26e5ed74c78ba404004_4838	Pseudomonase_1_01311
marC		NAAT family transporter MarC	3	3	1	1	2663	307	204		665	665	665		dcf007684d8598380507220e605e8e2c_3001	7ef7127a3f11d26e5ed74c78ba404004_4836	Pseudomonase_1_01310
marR		multiple antibiotic resistance transcriptional regulator MarR	3	3	1	1	2662	307	203		434	434	434		dcf007684d8598380507220e605e8e2c_3003	7ef7127a3f11d26e5ed74c78ba404004_4834	Pseudomonase_1_01309
marA		MDR efflux pump AcrAB transcriptional activator MarA	3	3	1	1	2661	307	202		383	383	383		dcf007684d8598380507220e605e8e2c_3005	7ef7127a3f11d26e5ed74c78ba404004_4832	Pseudomonase_1_01308
lacI		DNA-binding transcriptional repressor LacI	3	3	1	1	2496	17	80		1082	1148	1104		dcf007684d8598380507220e605e8e2c_706	7ef7127a3f11d26e5ed74c78ba404004_7371	Pseudomonase_1_10169
marB		multiple antibiotic resistance protein MarB	3	3	1	1	2660	307	201		218	218	218		dcf007684d8598380507220e605e8e2c_3007	7ef7127a3f11d26e5ed74c78ba404004_4830	Pseudomonase_1_01307
WP_000012593.1		6-phospho-beta-glucosidase	3	3	1	1	2659	307	200		1439	1439	1439		dcf007684d8598380507220e605e8e2c_3009	7ef7127a3f11d26e5ed74c78ba404004_4828	Pseudomonase_1_01306
eamA		O-acetylserine/cysteine exporter	3	3	1	1	2656	307	197		899	899	899		dcf007684d8598380507220e605e8e2c_3015	7ef7127a3f11d26e5ed74c78ba404004_4822	Pseudomonase_1_01303
ydeE		efflux MFS transporter YdeE	3	3	1	1	2655	307	196		1187	1187	1187		dcf007684d8598380507220e605e8e2c_3017	7ef7127a3f11d26e5ed74c78ba404004_4820	Pseudomonase_1_01302
mgtS		protein MgtS	3	3	1	1	2654	307	195		95	95	95		dcf007684d8598380507220e605e8e2c_3019	7ef7127a3f11d26e5ed74c78ba404004_4818	Pseudomonase_1_01301
dgcZ		diguanylate cyclase DgcZ	3	3	1	1	2652	307	194		890	890	890		dcf007684d8598380507220e605e8e2c_3023	7ef7127a3f11d26e5ed74c78ba404004_4814	Pseudomonase_1_01300
dcp		peptidyl-dipeptidase Dcp	3	3	1	1	2651	307	192		2045	2045	2045		dcf007684d8598380507220e605e8e2c_3029	7ef7127a3f11d26e5ed74c78ba404004_4808	Pseudomonase_1_01299
WP_024185765.1		hypothetical protein	3	3	1	1	2725	307	324		758	7817	4729		dcf007684d8598380507220e605e8e2c_2769	7ef7127a3f11d26e5ed74c78ba404004_5088	Pseudomonase_1_04854
ydfG		bifunctional NADP-dependent 3-hydroxy acid dehydrogenase/3-hydroxypropionate dehydrogenase YdfG	3	3	1	1	2650	307	190		746	746	746		dcf007684d8598380507220e605e8e2c_3031	7ef7127a3f11d26e5ed74c78ba404004_4806	Pseudomonase_1_01298
rspR		DNA-binding transcriptional regulator YdfH	3	3	1	1	2649	307	189		686	686	686		dcf007684d8598380507220e605e8e2c_3033	7ef7127a3f11d26e5ed74c78ba404004_4804	Pseudomonase_1_01297
ydfZ		putative selenium delivery protein YdfZ	3	3	1	1	2648	307	188		203	203	203		dcf007684d8598380507220e605e8e2c_3035	7ef7127a3f11d26e5ed74c78ba404004_4802	Pseudomonase_1_01296
ydfI		mannitol dehydrogenase family protein	3	3	1	1	2647	307	187		1460	1460	1460		dcf007684d8598380507220e605e8e2c_3037	7ef7127a3f11d26e5ed74c78ba404004_4800	Pseudomonase_1_01295
ydfJ		MHS family MFS transporter YdfJ	3	3	1	1	2646	307	186		1367	1367	1367		dcf007684d8598380507220e605e8e2c_3039	7ef7127a3f11d26e5ed74c78ba404004_4798	Pseudomonase_1_01294
rspB		Zn-dependent oxidoreductase	3	3	1	1	2645	307	185		1019	1019	1019		dcf007684d8598380507220e605e8e2c_3041	7ef7127a3f11d26e5ed74c78ba404004_4796	Pseudomonase_1_01293
rspA		D-galactonate dehydratase family member RspA	3	3	1	1	2644	307	184		1214	1214	1214		dcf007684d8598380507220e605e8e2c_3043	7ef7127a3f11d26e5ed74c78ba404004_4794	Pseudomonase_1_01292
ynfA		YnfA family protein	3	3	1	1	2643	307	183		326	326	326		dcf007684d8598380507220e605e8e2c_3045	7ef7127a3f11d26e5ed74c78ba404004_4792	Pseudomonase_1_01291
ynfB		DUF1283 family protein	3	3	1	1	2642	307	182		341	341	341		dcf007684d8598380507220e605e8e2c_3047	7ef7127a3f11d26e5ed74c78ba404004_4790	Pseudomonase_1_01290
speG		spermidine N1-acetyltransferase	3	3	1	1	2641	307	181		560	560	560		dcf007684d8598380507220e605e8e2c_3049	7ef7127a3f11d26e5ed74c78ba404004_4788	Pseudomonase_1_01289
hemB		porphobilinogen synthase	3	3	1	1	4518	329	29		974	1007	985		dcf007684d8598380507220e605e8e2c_734	7ef7127a3f11d26e5ed74c78ba404004_7340	Pseudomonase_1_06967
ynfD		DUF1161 domain-containing protein	3	3	1	1	2639	307	179		305	305	305		dcf007684d8598380507220e605e8e2c_3053	7ef7127a3f11d26e5ed74c78ba404004_4784	Pseudomonase_1_01287
dmsD		Tat proofreading chaperone DmsD	3	3	1	1	2637	307	178		614	614	614		dcf007684d8598380507220e605e8e2c_3057	7ef7127a3f11d26e5ed74c78ba404004_4780	Pseudomonase_1_01286
group_6913	bioD	dethiobiotin synthase	3	3	1	1	2635	307	176		695	695	695		dcf007684d8598380507220e605e8e2c_3061	7ef7127a3f11d26e5ed74c78ba404004_4776	Pseudomonase_1_01284
mlc		DNA-binding transcriptional repressor Mlc	3	3	1	1	2634	307	175		1220	1220	1220		dcf007684d8598380507220e605e8e2c_3063	7ef7127a3f11d26e5ed74c78ba404004_4774	Pseudomonase_1_01283
ynfL		LysR family transcriptional regulator	3	3	1	1	7663	307	174		893	893	893		dcf007684d8598380507220e605e8e2c_3065	7ef7127a3f11d26e5ed74c78ba404004_4772	Pseudomonase_1_01282
ynfM		MFS transporter	3	3	1	1	7664	307	173		1253	1253	1253		dcf007684d8598380507220e605e8e2c_3067	7ef7127a3f11d26e5ed74c78ba404004_4770	Pseudomonase_1_01281
asr		acid resistance repetitive basic protein Asr	3	3	1	1	7665	307	172		308	308	308		dcf007684d8598380507220e605e8e2c_3069	7ef7127a3f11d26e5ed74c78ba404004_4768	Pseudomonase_1_01280
ydgD		serine protease	3	3	1	1	7666	307	170		821	821	821		dcf007684d8598380507220e605e8e2c_3073	7ef7127a3f11d26e5ed74c78ba404004_4764	Pseudomonase_1_01279
rdgC		recombination-associated protein RdgC	3	3	1	1	4540	329	8		911	977	933		dcf007684d8598380507220e605e8e2c_778	7ef7127a3f11d26e5ed74c78ba404004_7296	Pseudomonase_1_06988
mdtI		multidrug/spermidine efflux SMR transporter subunit MdtI	3	3	1	1	7667	307	169		329	329	329		dcf007684d8598380507220e605e8e2c_3075	7ef7127a3f11d26e5ed74c78ba404004_4762	Pseudomonase_1_01278
mdtJ		multidrug/spermidine efflux SMR transporter subunit MdtJ	3	3	1	1	7668	307	168		365	365	365		dcf007684d8598380507220e605e8e2c_3077	7ef7127a3f11d26e5ed74c78ba404004_4760	Pseudomonase_1_01277
tqsA		AI-2 transporter TqsA	3	3	1	1	7669	307	167		1034	1034	1034		dcf007684d8598380507220e605e8e2c_3079	7ef7127a3f11d26e5ed74c78ba404004_4758	Pseudomonase_1_01276
pntB		Re/Si-specific NAD(P)(+) transhydrogenase subunit beta	3	3	1	1	7670	307	166		1388	1388	1388		dcf007684d8598380507220e605e8e2c_3081	7ef7127a3f11d26e5ed74c78ba404004_4756	Pseudomonase_1_01275
pntA		Re/Si-specific NAD(P)(+) transhydrogenase subunit alpha	3	3	1	1	7671	307	165		1532	1532	1532		dcf007684d8598380507220e605e8e2c_3083	7ef7127a3f11d26e5ed74c78ba404004_4754	Pseudomonase_1_01274
ydgH		DUF1471 family protein YdgH	3	3	1	1	7672	307	164		944	944	944		dcf007684d8598380507220e605e8e2c_3085	7ef7127a3f11d26e5ed74c78ba404004_4752	Pseudomonase_1_01273
ydgI		amino acid permease	3	3	1	1	7673	307	163		1382	1382	1382		dcf007684d8598380507220e605e8e2c_3087	7ef7127a3f11d26e5ed74c78ba404004_4750	Pseudomonase_1_01272
folM		dihydromonapterin reductase	3	3	1	1	7674	307	162		722	722	722		dcf007684d8598380507220e605e8e2c_3089	7ef7127a3f11d26e5ed74c78ba404004_4748	Pseudomonase_1_01271
ydgC		GlpM family protein	3	3	1	1	7675	307	161		335	335	335		dcf007684d8598380507220e605e8e2c_3091	7ef7127a3f11d26e5ed74c78ba404004_4746	Pseudomonase_1_01270
rstA		two-component system response regulator RstA	3	3	1	1	7676	307	160		719	719	719		dcf007684d8598380507220e605e8e2c_3093	7ef7127a3f11d26e5ed74c78ba404004_4744	Pseudomonase_1_01269
araJ		MFS transporter AraJ	3	3	1	1	4542	329	5		1184	1268	1212		dcf007684d8598380507220e605e8e2c_782	7ef7127a3f11d26e5ed74c78ba404004_7292	Pseudomonase_1_06990
rstB		two-component system sensor histidine kinase RstB	3	3	1	1	7677	307	159		1301	1301	1301		dcf007684d8598380507220e605e8e2c_3095	7ef7127a3f11d26e5ed74c78ba404004_4742	Pseudomonase_1_01268
tus		DNA replication terminus site-binding protein	3	3	1	1	7678	307	158		929	929	929		dcf007684d8598380507220e605e8e2c_3097	7ef7127a3f11d26e5ed74c78ba404004_4740	Pseudomonase_1_01267
fumC		class II fumarate hydratase	3	3	1	1	7679	307	157		1403	1403	1403		dcf007684d8598380507220e605e8e2c_3099	7ef7127a3f11d26e5ed74c78ba404004_4738	Pseudomonase_1_01266
fumB		class I fumarate hydratase	3	3	1	1	7680	307	156		1646	1646	1646		dcf007684d8598380507220e605e8e2c_3101	7ef7127a3f11d26e5ed74c78ba404004_4736	Pseudomonase_1_01265
manA		mannose-6-phosphate isomerase	3	3	1	1	7681	307	155		1175	1175	1175		dcf007684d8598380507220e605e8e2c_3103	7ef7127a3f11d26e5ed74c78ba404004_4734	Pseudomonase_1_01264
ydgA		YdgA family protein	3	3	1	1	7682	307	154		1508	1508	1508		dcf007684d8598380507220e605e8e2c_3105	7ef7127a3f11d26e5ed74c78ba404004_4732	Pseudomonase_1_01263
uidC		glucuronide uptake porin UidC	3	3	1	1	7683	307	153		1265	1265	1265		dcf007684d8598380507220e605e8e2c_3107	7ef7127a3f11d26e5ed74c78ba404004_4730	Pseudomonase_1_01262
uidB		glucuronide transporter	3	3	1	1	7684	307	152		1373	1373	1373		dcf007684d8598380507220e605e8e2c_3109	7ef7127a3f11d26e5ed74c78ba404004_4728	Pseudomonase_1_01261
uidA		beta-glucuronidase	3	3	1	1	7685	307	151		1811	1811	1811		dcf007684d8598380507220e605e8e2c_3111	7ef7127a3f11d26e5ed74c78ba404004_4726	Pseudomonase_1_01260
uidR		DNA-binding transcriptional regulator UidR	3	3	1	1	7686	307	150		590	590	590		dcf007684d8598380507220e605e8e2c_3113	7ef7127a3f11d26e5ed74c78ba404004_4724	Pseudomonase_1_01259
ybbO		NADP(+)-dependent aldehyde reductase	3	3	1	1	208	315	29		770	809	796		dcf007684d8598380507220e605e8e2c_988	7ef7127a3f11d26e5ed74c78ba404004_7086	Pseudomonase_1_07090
hdhA		7-alpha-hydroxysteroid dehydrogenase	3	3	1	1	7687	307	149		767	767	767		dcf007684d8598380507220e605e8e2c_3115	7ef7127a3f11d26e5ed74c78ba404004_4722	Pseudomonase_1_01258
malI		mal regulon transcriptional regulator MalI	3	3	1	1	7688	307	148		1028	1028	1028		dcf007684d8598380507220e605e8e2c_3117	7ef7127a3f11d26e5ed74c78ba404004_4720	Pseudomonase_1_01257
malX		PTS maltose transporter subunit IICB	3	3	1	1	7689	307	147		1592	1592	1592		dcf007684d8598380507220e605e8e2c_3119	7ef7127a3f11d26e5ed74c78ba404004_4718	Pseudomonase_1_01256
malY		bifunctional maltose regulon transcriptional repressor/cystathionine beta-lyase MalY	3	3	1	1	7690	307	146		1172	1172	1172		dcf007684d8598380507220e605e8e2c_3121	7ef7127a3f11d26e5ed74c78ba404004_4716	Pseudomonase_1_01255
add		adenosine deaminase	3	3	1	1	7691	307	145		1001	1001	1001		dcf007684d8598380507220e605e8e2c_3123	7ef7127a3f11d26e5ed74c78ba404004_4714	Pseudomonase_1_01254
ydgJ		oxidoreductase	3	3	1	1	7692	307	144		1040	1040	1040		dcf007684d8598380507220e605e8e2c_3125	7ef7127a3f11d26e5ed74c78ba404004_4712	Pseudomonase_1_01253
ydgT		transcription modulator YdgT	3	3	1	1	7694	307	142		215	215	215		dcf007684d8598380507220e605e8e2c_3129	7ef7127a3f11d26e5ed74c78ba404004_4708	Pseudomonase_1_01252
ydgK		DUF2569 domain-containing protein	3	3	1	1	7695	307	141		440	440	440		dcf007684d8598380507220e605e8e2c_3131	7ef7127a3f11d26e5ed74c78ba404004_4706	Pseudomonase_1_01251
rsxB		electron transport complex subunit RsxB	3	3	1	1	7698	454	5		578	578	578		dcf007684d8598380507220e605e8e2c_3135	7ef7127a3f11d26e5ed74c78ba404004_4702	Pseudomonase_1_01249
tesA		multifunctional acyl-CoA thioesterase I/protease I/lysophospholipase L1	3	3	1	1	209	315	28		593	623	613		dcf007684d8598380507220e605e8e2c_990	7ef7127a3f11d26e5ed74c78ba404004_7084	Pseudomonase_1_07091
rsxD		electron transport complex subunit RsxD	3	3	1	1	7696	454	3		1058	1058	1058		dcf007684d8598380507220e605e8e2c_3139	7ef7127a3f11d26e5ed74c78ba404004_4698	Pseudomonase_1_01247
rsxG		electron transport complex subunit RsxG	3	3	1	1	7629	454	2		620	620	620		dcf007684d8598380507220e605e8e2c_3141	7ef7127a3f11d26e5ed74c78ba404004_4696	Pseudomonase_1_01246
rsxE		electron transport complex subunit RsxE	3	3	1	1	7630	454	1		695	695	695		dcf007684d8598380507220e605e8e2c_3143	7ef7127a3f11d26e5ed74c78ba404004_4694	Pseudomonase_1_01245
dtpA		dipeptide/tripeptide permease DtpA	3	3	1	1	7628	370	17		1502	1502	1502		dcf007684d8598380507220e605e8e2c_3147	7ef7127a3f11d26e5ed74c78ba404004_4690	Pseudomonase_1_01243
gstA		glutathione transferase GstA	3	3	1	1	7627	370	16		605	605	605		dcf007684d8598380507220e605e8e2c_3149	7ef7127a3f11d26e5ed74c78ba404004_4688	Pseudomonase_1_01242
pdxY		pyridoxal kinase PdxY	3	3	1	1	7626	370	15		860	860	860		dcf007684d8598380507220e605e8e2c_3151	7ef7127a3f11d26e5ed74c78ba404004_4686	Pseudomonase_1_01241
tyrS		tyrosine--tRNA ligase	3	3	1	1	7625	370	14		1274	1274	1274		dcf007684d8598380507220e605e8e2c_3153	7ef7127a3f11d26e5ed74c78ba404004_4684	Pseudomonase_1_01240
pdxH		pyridoxamine 5'-phosphate oxidase	3	3	1	1	7624	370	13		656	656	656		dcf007684d8598380507220e605e8e2c_3155	7ef7127a3f11d26e5ed74c78ba404004_4682	Pseudomonase_1_01239
mliC		C-type lysozyme inhibitor	3	3	1	1	7623	370	12		323	329	327		dcf007684d8598380507220e605e8e2c_3157	7ef7127a3f11d26e5ed74c78ba404004_4680	Pseudomonase_1_01238
anmK		anhydro-N-acetylmuramic acid kinase	3	3	1	1	7622	370	11		1109	1109	1109		dcf007684d8598380507220e605e8e2c_3159	7ef7127a3f11d26e5ed74c78ba404004_4678	Pseudomonase_1_01237
WP_000490215.1		DUF4222 domain-containing protein	3	3	1	1	517	307	428		239	239	239		dcf007684d8598380507220e605e8e2c_1063	7ef7127a3f11d26e5ed74c78ba404004_5676	Pseudomonase_1_09294
slyB		outer membrane lipoprotein SlyB	3	3	1	1	7724	370	10		467	467	467		dcf007684d8598380507220e605e8e2c_3161	7ef7127a3f11d26e5ed74c78ba404004_4676	Pseudomonase_1_01236
slyA		transcriptional regulator SlyA	3	3	1	1	7725	370	9		434	434	434		dcf007684d8598380507220e605e8e2c_3163	7ef7127a3f11d26e5ed74c78ba404004_4674	Pseudomonase_1_01235
ydhI		DUF1656 domain-containing protein	3	3	1	1	7726	370	8		236	236	236		dcf007684d8598380507220e605e8e2c_3165	7ef7127a3f11d26e5ed74c78ba404004_4672	Pseudomonase_1_01234
ydhJ		HlyD family secretion protein	3	3	1	1	7727	370	7		857	857	857		dcf007684d8598380507220e605e8e2c_3167	7ef7127a3f11d26e5ed74c78ba404004_4670	Pseudomonase_1_01233
ydhK		FUSC family protein	3	3	1	1	7728	370	6		2012	2012	2012		dcf007684d8598380507220e605e8e2c_3169	7ef7127a3f11d26e5ed74c78ba404004_4668	Pseudomonase_1_01232
sodC		superoxide dismutase [Cu-Zn] SodC	3	3	1	1	7729	370	5		521	521	521		dcf007684d8598380507220e605e8e2c_3171	7ef7127a3f11d26e5ed74c78ba404004_4666	Pseudomonase_1_01231
ydhF		aldo/keto reductase family oxidoreductase	3	3	1	1	7731	370	4		896	896	896		dcf007684d8598380507220e605e8e2c_3173	7ef7127a3f11d26e5ed74c78ba404004_4664	Pseudomonase_1_01230
nemR		DNA-binding transcriptional regulator NemR	3	3	1	1	7732	370	2		599	599	599		dcf007684d8598380507220e605e8e2c_3177	7ef7127a3f11d26e5ed74c78ba404004_4660	Pseudomonase_1_01229
nemA		N-ethylmaleimide reductase	3	3	1	1	7733	370	1		1097	1097	1097		dcf007684d8598380507220e605e8e2c_3179	7ef7127a3f11d26e5ed74c78ba404004_4658	Pseudomonase_1_01228
rnt		ribonuclease T	3	3	1	1	7746	334	1		647	647	647		dcf007684d8598380507220e605e8e2c_3183	7ef7127a3f11d26e5ed74c78ba404004_4654	Pseudomonase_1_01226
grxD		monothiol glutaredoxin 4	3	3	1	1	7745	334	3		347	347	347		dcf007684d8598380507220e605e8e2c_3187	7ef7127a3f11d26e5ed74c78ba404004_4650	Pseudomonase_1_01225
mepH		peptidoglycan DD-endopeptidase MepH	3	3	1	1	7744	334	4		815	815	815		dcf007684d8598380507220e605e8e2c_3189	7ef7127a3f11d26e5ed74c78ba404004_4648	Pseudomonase_1_01224
sodB		superoxide dismutase [Fe]	3	3	1	1	7743	334	5		581	581	581		dcf007684d8598380507220e605e8e2c_3191	7ef7127a3f11d26e5ed74c78ba404004_4646	Pseudomonase_1_01223
ydhP		MFS transporter	3	3	1	1	7742	334	6		1169	1169	1169		dcf007684d8598380507220e605e8e2c_3193	7ef7127a3f11d26e5ed74c78ba404004_4644	Pseudomonase_1_01222
ynhF		cytochrome bd-I accessory subunit CydH	3	3	1	1	7741	334	7		89	89	89		dcf007684d8598380507220e605e8e2c_3195	7ef7127a3f11d26e5ed74c78ba404004_4642	Pseudomonase_1_01221
purR		HTH-type transcriptional repressor PurR	3	3	1	1	7740	334	8		1025	1025	1025		dcf007684d8598380507220e605e8e2c_3197	7ef7127a3f11d26e5ed74c78ba404004_4640	Pseudomonase_1_01220
punR		LysR family transcriptional regulator	3	3	1	1	7739	334	9		932	932	932		dcf007684d8598380507220e605e8e2c_3199	7ef7127a3f11d26e5ed74c78ba404004_4638	Pseudomonase_1_01219
punC		Inner membrane transport protein YdhC	3	3	1	1	7738	334	10		1211	1211	1211		dcf007684d8598380507220e605e8e2c_3201	7ef7127a3f11d26e5ed74c78ba404004_4636	Pseudomonase_1_01218
WP_000149544.1		DUF1317 domain-containing protein	3	3	1	1	515	307	435		182	182	182		dcf007684d8598380507220e605e8e2c_1071	7ef7127a3f11d26e5ed74c78ba404004_5654	Pseudomonase_1_09292
cfa		cyclopropane fatty acyl phospholipid synthase	3	3	1	1	7737	334	11		1148	1148	1148		dcf007684d8598380507220e605e8e2c_3203	7ef7127a3f11d26e5ed74c78ba404004_4634	Pseudomonase_1_01217
group_6981	ribE	riboflavin synthase	3	3	1	1	7736	334	12		641	641	641		dcf007684d8598380507220e605e8e2c_3205	7ef7127a3f11d26e5ed74c78ba404004_4632	Pseudomonase_1_01216
mdtK		multidrug efflux MATE transporter MdtK	3	3	1	1	7735	334	13		1373	1373	1373		dcf007684d8598380507220e605e8e2c_3207	7ef7127a3f11d26e5ed74c78ba404004_4630	Pseudomonase_1_01215
ydhQ		AIDA repeat-containing protein	3	3	1	1	8380	334	14		1256	1256	1256		dcf007684d8598380507220e605e8e2c_3209	7ef7127a3f11d26e5ed74c78ba404004_4628	Pseudomonase_1_01214
ydhR		monooxygenase	3	3	1	1	8381	334	15		305	305	305		dcf007684d8598380507220e605e8e2c_3217	7ef7127a3f11d26e5ed74c78ba404004_4620	Pseudomonase_1_01211
ydhS		FAD-NAD(P)-binding protein	3	3	1	1	8382	334	16		1610	1610	1610		dcf007684d8598380507220e605e8e2c_3219	7ef7127a3f11d26e5ed74c78ba404004_4618	Pseudomonase_1_01210
ydhU		thiosulfate reductase cytochrome B subunit	3	3	1	1	8384	334	18		785	785	785		dcf007684d8598380507220e605e8e2c_3223	7ef7127a3f11d26e5ed74c78ba404004_4614	Pseudomonase_1_01208
ydhX		4Fe-4S dicluster domain-containing protein	3	3	1	1	8385	334	19		668	668	668		dcf007684d8598380507220e605e8e2c_3225	7ef7127a3f11d26e5ed74c78ba404004_4612	Pseudomonase_1_01207
ydhW		YdhW family putative oxidoreductase system protein	3	3	1	1	8386	334	20		638	638	638		dcf007684d8598380507220e605e8e2c_3227	7ef7127a3f11d26e5ed74c78ba404004_4610	Pseudomonase_1_01206
ydhY		ferredoxin-like protein	3	3	1	1	8388	334	22		626	626	626		dcf007684d8598380507220e605e8e2c_3231	7ef7127a3f11d26e5ed74c78ba404004_4606	Pseudomonase_1_01204
WP_001302016.1		LexA family transcriptional regulator	3	3	1	1	503	307	448		653	695	681		dcf007684d8598380507220e605e8e2c_1095	7ef7127a3f11d26e5ed74c78ba404004_5628	Pseudomonase_1_09282
fumD		fumarate hydratase FumD	3	3	1	1	8389	334	24		209	209	209		dcf007684d8598380507220e605e8e2c_3233	7ef7127a3f11d26e5ed74c78ba404004_4604	Pseudomonase_1_01203
pykF		pyruvate kinase PykF	3	3	1	1	8391	334	25		1412	1412	1412		dcf007684d8598380507220e605e8e2c_3237	7ef7127a3f11d26e5ed74c78ba404004_4600	Pseudomonase_1_01202
lpp		murein lipoprotein Lpp	3	3	1	1	8392	334	26		236	236	236		dcf007684d8598380507220e605e8e2c_3239	7ef7127a3f11d26e5ed74c78ba404004_4598	Pseudomonase_1_01201
ldtE		L,D-transpeptidase LdtE	3	3	1	1	8393	334	27		1004	1004	1004		dcf007684d8598380507220e605e8e2c_3241	7ef7127a3f11d26e5ed74c78ba404004_4596	Pseudomonase_1_01200
sufE		cysteine desulfuration protein SufE	3	3	1	1	8394	334	28		416	416	416		dcf007684d8598380507220e605e8e2c_3243	7ef7127a3f11d26e5ed74c78ba404004_4594	Pseudomonase_1_01199
sufS		cysteine desulfurase SufS	3	3	1	1	8395	334	29		1220	1220	1220		dcf007684d8598380507220e605e8e2c_3245	7ef7127a3f11d26e5ed74c78ba404004_4592	Pseudomonase_1_01198
sufD		Fe-S cluster assembly protein SufD	3	3	1	1	8396	334	30		1271	1271	1271		dcf007684d8598380507220e605e8e2c_3247	7ef7127a3f11d26e5ed74c78ba404004_4590	Pseudomonase_1_01197
sufC		Fe-S cluster assembly ATPase SufC	3	3	1	1	8397	334	31		746	746	746		dcf007684d8598380507220e605e8e2c_3249	7ef7127a3f11d26e5ed74c78ba404004_4588	Pseudomonase_1_01196
sufA		Fe-S cluster assembly scaffold SufA	3	3	1	1	8307	363	3		368	368	368		dcf007684d8598380507220e605e8e2c_3253	7ef7127a3f11d26e5ed74c78ba404004_4584	Pseudomonase_1_01194
WP_001234732.1		hypothetical protein	3	6	2	1	6003				161	818	654		dcf007684d8598380507220e605e8e2c_4063	7ef7127a3f11d26e5ed74c78ba404004_6165 7ef7127a3f11d26e5ed74c78ba404004_7535	Pseudomonase_1_03561 Pseudomonase_1_09152 Pseudomonase_1_09155
pgrR_1		LysR family transcriptional regulator	3	3	1	1	2677	307	223		122	671	456		dcf007684d8598380507220e605e8e2c_2963	7ef7127a3f11d26e5ed74c78ba404004_4914	Pseudomonase_1_01323
WP_000442609.1		CII family transcriptional regulator	3	3	1	1	501	307	459		296	299	297		dcf007684d8598380507220e605e8e2c_1099	7ef7127a3f11d26e5ed74c78ba404004_5624	Pseudomonase_1_09280
ydiH		YdiH family protein	3	3	1	1	8306	363	4		188	188	188		dcf007684d8598380507220e605e8e2c_3255	7ef7127a3f11d26e5ed74c78ba404004_4582	Pseudomonase_1_01193
menI		1,4-dihydroxy-2-naphthoyl-CoA hydrolase	3	3	1	1	8305	363	5		410	410	410		dcf007684d8598380507220e605e8e2c_3257	7ef7127a3f11d26e5ed74c78ba404004_4580	Pseudomonase_1_01192
ydiJ		FAD-binding oxidoreductase	3	3	1	1	8304	363	6		3056	3056	3056		dcf007684d8598380507220e605e8e2c_3259	7ef7127a3f11d26e5ed74c78ba404004_4578	Pseudomonase_1_01191
ydiK		AI-2E family transporter YdiK	3	3	1	1	8303	363	7		1112	1112	1112		dcf007684d8598380507220e605e8e2c_3261	7ef7127a3f11d26e5ed74c78ba404004_4576	Pseudomonase_1_01190
ydiL		YdiL family protein	3	3	1	1	8302	363	8		356	356	356		dcf007684d8598380507220e605e8e2c_3266	7ef7127a3f11d26e5ed74c78ba404004_4571	Pseudomonase_1_01189
ydiM		MFS transporter	3	3	1	1	8301	363	9		1214	1214	1214		dcf007684d8598380507220e605e8e2c_3268	7ef7127a3f11d26e5ed74c78ba404004_4569	Pseudomonase_1_01188
ydiN		MFS transporter	3	3	1	1	8300	363	10		1265	1265	1265		dcf007684d8598380507220e605e8e2c_3270	7ef7127a3f11d26e5ed74c78ba404004_4567	Pseudomonase_1_01187
ydiB		quinate/shikimate dehydrogenase	3	3	1	1	8299	363	11		866	866	866		dcf007684d8598380507220e605e8e2c_3272	7ef7127a3f11d26e5ed74c78ba404004_4565	Pseudomonase_1_01186
aroD		type I 3-dehydroquinate dehydratase	3	3	1	1	8298	363	12		758	758	758		dcf007684d8598380507220e605e8e2c_3274	7ef7127a3f11d26e5ed74c78ba404004_4563	Pseudomonase_1_01185
ydiF		acyl CoA:acetate/3-ketoacid CoA transferase	3	3	1	1	8297	363	13		1595	1595	1595		dcf007684d8598380507220e605e8e2c_3276	7ef7127a3f11d26e5ed74c78ba404004_4561	Pseudomonase_1_01184
ylcG		YlcG family protein	3	3	1	1	491	307	89		137	140	139		dcf007684d8598380507220e605e8e2c_1121	7ef7127a3f11d26e5ed74c78ba404004_5602	Pseudomonase_1_04610
ydiO		acyl-CoA dehydrogenase	3	3	1	1	8296	363	14		1151	1151	1151		dcf007684d8598380507220e605e8e2c_3278	7ef7127a3f11d26e5ed74c78ba404004_4559	Pseudomonase_1_01183
ydiP		AraC family transcriptional regulator	3	3	1	1	8295	363	16		911	911	911		dcf007684d8598380507220e605e8e2c_3280	7ef7127a3f11d26e5ed74c78ba404004_4557	Pseudomonase_1_01182
ydiQ		electron transfer flavoprotein	3	3	1	1	8289	363	17		764	764	764		dcf007684d8598380507220e605e8e2c_3282	7ef7127a3f11d26e5ed74c78ba404004_4555	Pseudomonase_1_01180
ydiR		electron transfer flavoprotein subunit alpha	3	3	1	1	8290	363	18		938	938	938		dcf007684d8598380507220e605e8e2c_3284	7ef7127a3f11d26e5ed74c78ba404004_4553	Pseudomonase_1_01179
ydiS		FAD-dependent oxidoreductase	3	3	1	1	8291	363	19		1289	1289	1289		dcf007684d8598380507220e605e8e2c_3286	7ef7127a3f11d26e5ed74c78ba404004_4551	Pseudomonase_1_01178
ydiT		ferredoxin family protein	3	3	1	1	8292	363	2		293	293	293		dcf007684d8598380507220e605e8e2c_3288	7ef7127a3f11d26e5ed74c78ba404004_4549	Pseudomonase_1_01177
fadK		medium-chain fatty-acid--CoA ligase	3	3	1	1	8293	363	1		1646	1646	1646		dcf007684d8598380507220e605e8e2c_3290	7ef7127a3f11d26e5ed74c78ba404004_4547	Pseudomonase_1_01176
aroH		3-deoxy-7-phosphoheptulonate synthase AroH	3	3	1	1	8424	412	8		1046	1046	1046		dcf007684d8598380507220e605e8e2c_3296	7ef7127a3f11d26e5ed74c78ba404004_4541	Pseudomonase_1_01173
hemP		hemin uptake protein HemP	3	3	1	1	8423	412	7		191	191	191		dcf007684d8598380507220e605e8e2c_3298	7ef7127a3f11d26e5ed74c78ba404004_4539	Pseudomonase_1_01172
selO		protein adenylyltransferase SelO	3	3	1	1	8440	412	6		1436	1436	1436		dcf007684d8598380507220e605e8e2c_3300	7ef7127a3f11d26e5ed74c78ba404004_4537	Pseudomonase_1_01171
WP_001304453.1		phage terminase large subunit family protein	3	3	1	1	481	307	99		1748	1928	1868		dcf007684d8598380507220e605e8e2c_1141	7ef7127a3f11d26e5ed74c78ba404004_5582	Pseudomonase_1_04620
ydiV		anti-FlhDC factor	3	3	1	1	8441	412	5		713	713	713		dcf007684d8598380507220e605e8e2c_3302	7ef7127a3f11d26e5ed74c78ba404004_4535	Pseudomonase_1_01170
nlpC		NlpC/P60 family protein	3	3	1	1	8442	412	4		464	464	464		dcf007684d8598380507220e605e8e2c_3304	7ef7127a3f11d26e5ed74c78ba404004_4533	Pseudomonase_1_01169
btuD		vitamin B12 ABC transporter ATP-binding protein BtuD	3	3	1	1	8443	412	3		749	749	749		dcf007684d8598380507220e605e8e2c_3306	7ef7127a3f11d26e5ed74c78ba404004_4531	Pseudomonase_1_01168
btuE		bifunctional thioredoxin/glutathione peroxidase	3	3	1	1	8444	412	2		551	551	551		dcf007684d8598380507220e605e8e2c_3308	7ef7127a3f11d26e5ed74c78ba404004_4529	Pseudomonase_1_01167
btuC		vitamin B12 ABC transporter permease BtuC	3	3	1	1	8445	412	1		980	980	980		dcf007684d8598380507220e605e8e2c_3310	7ef7127a3f11d26e5ed74c78ba404004_4527	Pseudomonase_1_01166
pheT		phenylalanine--tRNA ligase subunit beta	3	3	1	1	8288	539	1		2387	2387	2387		dcf007684d8598380507220e605e8e2c_3314	7ef7127a3f11d26e5ed74c78ba404004_4523	Pseudomonase_1_01164
thrS		threonine--tRNA ligase	3	3	1	1	8286	368	2		1928	1928	1928		dcf007684d8598380507220e605e8e2c_3327	7ef7127a3f11d26e5ed74c78ba404004_4510	Pseudomonase_1_01159
WP_001313892.1		hypothetical protein	3	3	1	1	8284	368	3		107	107	107		dcf007684d8598380507220e605e8e2c_3331	7ef7127a3f11d26e5ed74c78ba404004_4506	Pseudomonase_1_01157
ydiY		YdiY family protein	3	3	1	1	8283	368	4		758	758	758		dcf007684d8598380507220e605e8e2c_3333	7ef7127a3f11d26e5ed74c78ba404004_4504	Pseudomonase_1_01156
pfkB		6-phosphofructokinase II	3	3	1	1	8282	368	5		929	929	929		dcf007684d8598380507220e605e8e2c_3335	7ef7127a3f11d26e5ed74c78ba404004_4502	Pseudomonase_1_01155
WP_021548330.1		phage minor tail protein L	3	3	1	1	779	307	114		88	698	494		dcf007684d8598380507220e605e8e2c_1171	7ef7127a3f11d26e5ed74c78ba404004_5552	Pseudomonase_1_04635
ghoS		type V toxin-antitoxin system endoribonuclease antitoxin GhoS	3	3	1	1	8281	368	6		290	290	290		dcf007684d8598380507220e605e8e2c_3337	7ef7127a3f11d26e5ed74c78ba404004_4500	Pseudomonase_1_01154
yniA		fructosamine kinase family protein	3	3	1	1	8280	368	18		860	860	860		dcf007684d8598380507220e605e8e2c_3339	7ef7127a3f11d26e5ed74c78ba404004_4498	Pseudomonase_1_01153
yniB		YniB family protein	3	3	1	1	8279	368	17		536	536	536		dcf007684d8598380507220e605e8e2c_3341	7ef7127a3f11d26e5ed74c78ba404004_4496	Pseudomonase_1_01152
hxpB		hexitol phosphatase HxpB	3	3	1	1	8278	368	16		668	668	668		dcf007684d8598380507220e605e8e2c_3343	7ef7127a3f11d26e5ed74c78ba404004_4494	Pseudomonase_1_01151
ydjM		metal-dependent hydrolase	3	3	1	1	8277	368	15		590	590	590		dcf007684d8598380507220e605e8e2c_3345	7ef7127a3f11d26e5ed74c78ba404004_4492	Pseudomonase_1_01150
tcyP		cystine/sulfocysteine:cation symporter	3	3	1	1	8276	368	14		1391	1391	1391		dcf007684d8598380507220e605e8e2c_3347	7ef7127a3f11d26e5ed74c78ba404004_4490	Pseudomonase_1_01149
cedA		cell division activator CedA	3	3	1	1	8275	368	13		263	263	263		dcf007684d8598380507220e605e8e2c_3349	7ef7127a3f11d26e5ed74c78ba404004_4488	Pseudomonase_1_01148
katE		catalase HPII	3	3	1	1	8274	368	12		2261	2261	2261		dcf007684d8598380507220e605e8e2c_3351	7ef7127a3f11d26e5ed74c78ba404004_4486	Pseudomonase_1_01147
chbG		chitin disaccharide deacetylase	3	3	1	1	8273	368	11		758	758	758		dcf007684d8598380507220e605e8e2c_3353	7ef7127a3f11d26e5ed74c78ba404004_4484	Pseudomonase_1_01146
celF		6-phospho-beta-glucosidase	3	3	1	1	8272	368	10		1352	1352	1352		dcf007684d8598380507220e605e8e2c_3355	7ef7127a3f11d26e5ed74c78ba404004_4482	Pseudomonase_1_01145
entD		enterobactin synthase subunit EntD	3	3	1	1	3989	307	398		620	743	661		dcf007684d8598380507220e605e8e2c_1209	7ef7127a3f11d26e5ed74c78ba404004_6979	Pseudomonase_1_02320
chbR		transcriptional regulator ChbR	3	3	1	1	8271	368	9		839	842	841		dcf007684d8598380507220e605e8e2c_3357	7ef7127a3f11d26e5ed74c78ba404004_4480	Pseudomonase_1_01144
chbA		PTS N,N'-diacetylchitobiose transporter subunit IIA	3	3	1	1	8270	368	8		350	350	350		dcf007684d8598380507220e605e8e2c_3359	7ef7127a3f11d26e5ed74c78ba404004_4478	Pseudomonase_1_01143
chbC		PTS N,N'-diacetylchitobiose transporter subunit IIC	3	3	1	1	8269	368	7		1358	1358	1358		dcf007684d8598380507220e605e8e2c_3361	7ef7127a3f11d26e5ed74c78ba404004_4476	Pseudomonase_1_01142
osmE		osmotically-inducible lipoprotein OsmE	3	3	1	1	8267	320	1		338	338	338		dcf007684d8598380507220e605e8e2c_3365	7ef7127a3f11d26e5ed74c78ba404004_4472	Pseudomonase_1_01140
nadE		ammonia-dependent NAD(+) synthetase	3	3	1	1	8266	320	2		827	827	827		dcf007684d8598380507220e605e8e2c_3367	7ef7127a3f11d26e5ed74c78ba404004_4470	Pseudomonase_1_01139
cho		excinuclease Cho	3	3	1	1	8265	320	3		887	887	887		dcf007684d8598380507220e605e8e2c_3369	7ef7127a3f11d26e5ed74c78ba404004_4468	Pseudomonase_1_01138
ves		environmental stress-induced protein Ves	3	3	1	1	8264	320	4		575	575	575		dcf007684d8598380507220e605e8e2c_3371	7ef7127a3f11d26e5ed74c78ba404004_4466	Pseudomonase_1_01137
spy		ATP-independent periplasmic protein-refolding chaperone Spy	3	3	1	1	8263	320	5		485	485	485		dcf007684d8598380507220e605e8e2c_3373	7ef7127a3f11d26e5ed74c78ba404004_4464	Pseudomonase_1_01136
astE		succinylglutamate desuccinylase	3	3	1	1	8262	320	6		968	968	968		dcf007684d8598380507220e605e8e2c_3375	7ef7127a3f11d26e5ed74c78ba404004_4462	Pseudomonase_1_01135
astB		N-succinylarginine dihydrolase	3	3	1	1	8261	320	7		1343	1343	1343		dcf007684d8598380507220e605e8e2c_3377	7ef7127a3f11d26e5ed74c78ba404004_4460	Pseudomonase_1_01134
group_705		LysR family transcriptional regulator	3	3	1	1	937	523	2		188	320	276		dcf007684d8598380507220e605e8e2c_1299	7ef7127a3f11d26e5ed74c78ba404004_6889	Pseudomonase_1_02275
astD		succinylglutamate-semialdehyde dehydrogenase	3	3	1	1	8260	320	8		1478	1478	1478		dcf007684d8598380507220e605e8e2c_3379	7ef7127a3f11d26e5ed74c78ba404004_4458	Pseudomonase_1_01133
astA		arginine N-succinyltransferase	3	3	1	1	8259	320	9		1034	1034	1034		dcf007684d8598380507220e605e8e2c_3381	7ef7127a3f11d26e5ed74c78ba404004_4456	Pseudomonase_1_01132
astC		succinylornithine/acetylornithine transaminase	3	3	1	1	8258	320	10		1220	1220	1220		dcf007684d8598380507220e605e8e2c_3383	7ef7127a3f11d26e5ed74c78ba404004_4454	Pseudomonase_1_01131
xthA		exodeoxyribonuclease III	3	3	1	1	8257	320	42		806	806	806		dcf007684d8598380507220e605e8e2c_3385	7ef7127a3f11d26e5ed74c78ba404004_4452	Pseudomonase_1_01130
ydjX		TVP38/TMEM64 family protein	3	3	1	1	8256	320	41		710	710	710		dcf007684d8598380507220e605e8e2c_3387	7ef7127a3f11d26e5ed74c78ba404004_4450	Pseudomonase_1_01129
ydjY		lipoprotein YdjY	3	3	1	1	8255	320	40		677	677	677		dcf007684d8598380507220e605e8e2c_3389	7ef7127a3f11d26e5ed74c78ba404004_4448	Pseudomonase_1_01128
ydjZ		TVP38/TMEM64 family protein	3	3	1	1	8254	320	39		704	707	706		dcf007684d8598380507220e605e8e2c_3391	7ef7127a3f11d26e5ed74c78ba404004_4446	Pseudomonase_1_01127
ynjA		carboxymuconolactone decarboxylase family protein	3	3	1	1	8253	320	38		548	548	548		dcf007684d8598380507220e605e8e2c_3393	7ef7127a3f11d26e5ed74c78ba404004_4444	Pseudomonase_1_01126
ynjB		ABC transporter substrate-binding protein	3	3	1	1	8252	320	37		1166	1166	1166		dcf007684d8598380507220e605e8e2c_3395	7ef7127a3f11d26e5ed74c78ba404004_4442	Pseudomonase_1_01125
ynjC		ABC transporter permease	3	3	1	1	8251	320	36		1535	1535	1535		dcf007684d8598380507220e605e8e2c_3397	7ef7127a3f11d26e5ed74c78ba404004_4440	Pseudomonase_1_01124
ybfE		LexA regulated protein	3	3	1	1	1069	499	2		293	362	316		dcf007684d8598380507220e605e8e2c_1395	7ef7127a3f11d26e5ed74c78ba404004_6772	Pseudomonase_1_02221
ynjD		ATP-binding cassette domain-containing protein	3	3	1	1	8250	320	35		653	653	653		dcf007684d8598380507220e605e8e2c_3399	7ef7127a3f11d26e5ed74c78ba404004_4438	Pseudomonase_1_01123
ynjE		thiosulfate sulfurtransferase YnjE	3	3	1	1	8249	320	34		1307	1307	1307		dcf007684d8598380507220e605e8e2c_3401	7ef7127a3f11d26e5ed74c78ba404004_4436	Pseudomonase_1_01122
ynjF		CDP-alcohol phosphatidyltransferase family protein	3	3	1	1	8248	320	33		620	620	620		dcf007684d8598380507220e605e8e2c_3403	7ef7127a3f11d26e5ed74c78ba404004_4434	Pseudomonase_1_01121
nudG		CTP pyrophosphohydrolase	3	3	1	1	8247	320	32		407	407	407		dcf007684d8598380507220e605e8e2c_3405	7ef7127a3f11d26e5ed74c78ba404004_4432	Pseudomonase_1_01120
ynjH		YnjH family protein	3	3	1	1	8246	320	31	Hypothetical protein with no hits to refseq/uniprot/clusters/cdd/tigrfams/pfam overlapping another protein with hits	272	272	272		dcf007684d8598380507220e605e8e2c_3407	7ef7127a3f11d26e5ed74c78ba404004_4430	Pseudomonase_1_01119
gdhA		NADP-specific glutamate dehydrogenase	3	3	1	1	8245	320	30		1343	1343	1343		dcf007684d8598380507220e605e8e2c_3409	7ef7127a3f11d26e5ed74c78ba404004_4428	Pseudomonase_1_01118
WP_000995920.1		SEL1-like repeat protein	3	3	1	1	8244	320	29		1943	1943	1943		dcf007684d8598380507220e605e8e2c_3411	7ef7127a3f11d26e5ed74c78ba404004_4426	Pseudomonase_1_01117
WP_000995913.1		SEL1-like repeat protein	3	3	1	1	8243	320	28		1949	1949	1949		dcf007684d8598380507220e605e8e2c_3413	7ef7127a3f11d26e5ed74c78ba404004_4424	Pseudomonase_1_01116
WP_000583404.1		molecular chaperone HscC	3	3	1	1	8242	320	27		1700	1700	1700		dcf007684d8598380507220e605e8e2c_3415	7ef7127a3f11d26e5ed74c78ba404004_4422	Pseudomonase_1_01115
topB		DNA topoisomerase III	3	3	1	1	8241	320	26		1946	1946	1946		dcf007684d8598380507220e605e8e2c_3417	7ef7127a3f11d26e5ed74c78ba404004_4420	Pseudomonase_1_01114
ybgC		tol-pal system-associated acyl-CoA thioesterase	3	3	1	1	1113	438	1		362	404	390		dcf007684d8598380507220e605e8e2c_1473	7ef7127a3f11d26e5ed74c78ba404004_6694	Pseudomonase_1_02183
selD		selenide, water dikinase SelD	3	3	1	1	8240	320	25		1043	1043	1043		dcf007684d8598380507220e605e8e2c_3419	7ef7127a3f11d26e5ed74c78ba404004_4418	Pseudomonase_1_01113
ydjA		NAD(P)H nitroreductase	3	3	1	1	8239	320	24		551	551	551		dcf007684d8598380507220e605e8e2c_3421	7ef7127a3f11d26e5ed74c78ba404004_4416	Pseudomonase_1_01112
sppA		signal peptide peptidase SppA	3	3	1	1	10876	320	23		1856	1856	1856		dcf007684d8598380507220e605e8e2c_3423	7ef7127a3f11d26e5ed74c78ba404004_4414	Pseudomonase_1_01111
ansA		asparaginase	3	3	1	1	10877	320	22		1016	1016	1016		dcf007684d8598380507220e605e8e2c_3425	7ef7127a3f11d26e5ed74c78ba404004_4412	Pseudomonase_1_01110
pncA		bifunctional nicotinamidase/pyrazinamidase	3	3	1	1	10878	320	21		641	641	641		dcf007684d8598380507220e605e8e2c_3427	7ef7127a3f11d26e5ed74c78ba404004_4410	Pseudomonase_1_01109
ydjE		MFS transporter	3	3	1	1	10879	320	20		1358	1358	1358		dcf007684d8598380507220e605e8e2c_3429	7ef7127a3f11d26e5ed74c78ba404004_4408	Pseudomonase_1_01108
ydjF		DeoR/GlpR family DNA-binding transcription regulator	3	3	1	1	10880	320	19		758	758	758		dcf007684d8598380507220e605e8e2c_3431	7ef7127a3f11d26e5ed74c78ba404004_4406	Pseudomonase_1_01107
ydjG		NADH-dependent methylglyoxal reductase	3	3	1	1	10881	320	18		980	980	980		dcf007684d8598380507220e605e8e2c_3433	7ef7127a3f11d26e5ed74c78ba404004_4404	Pseudomonase_1_01106
ydjH		sugar kinase	3	3	1	1	10882	320	17		947	947	947		dcf007684d8598380507220e605e8e2c_3435	7ef7127a3f11d26e5ed74c78ba404004_4402	Pseudomonase_1_01105
ydjI		ketose-bisphosphate aldolase	3	3	1	1	10883	320	16		836	836	836		dcf007684d8598380507220e605e8e2c_3437	7ef7127a3f11d26e5ed74c78ba404004_4400	Pseudomonase_1_01104
WP_000605480.1		hypothetical protein	3	3	1	1	1315	319	25		278	284	282		dcf007684d8598380507220e605e8e2c_1678	7ef7127a3f11d26e5ed74c78ba404004_6468	Pseudomonase_1_02077
ydjJ		NAD(P)-dependent alcohol dehydrogenase	3	3	1	1	10884	320	15		1043	1043	1043		dcf007684d8598380507220e605e8e2c_3439	7ef7127a3f11d26e5ed74c78ba404004_4398	Pseudomonase_1_01103
ydjK		MFS transporter	3	3	1	1	10885	320	14		1379	1379	1379		dcf007684d8598380507220e605e8e2c_3441	7ef7127a3f11d26e5ed74c78ba404004_4396	Pseudomonase_1_01102
ydjL		zinc-binding dehydrogenase	3	3	1	1	10886	320	13		1076	1076	1076		dcf007684d8598380507220e605e8e2c_3443	7ef7127a3f11d26e5ed74c78ba404004_4394	Pseudomonase_1_01101
yeaC		YeaC family protein	3	3	1	1	10887	320	12		272	272	272		dcf007684d8598380507220e605e8e2c_3445	7ef7127a3f11d26e5ed74c78ba404004_4392	Pseudomonase_1_01100
msrB		peptide-methionine (R)-S-oxide reductase MsrB	3	3	1	1	10888	320	11		413	413	413		dcf007684d8598380507220e605e8e2c_3447	7ef7127a3f11d26e5ed74c78ba404004_4390	Pseudomonase_1_01099
yeaD		D-hexose-6-phosphate mutarotase	3	3	1	1	10890	484	3		884	884	884		dcf007684d8598380507220e605e8e2c_3451	7ef7127a3f11d26e5ed74c78ba404004_4386	Pseudomonase_1_01097
yeaE		methylglyoxal reductase YeaE	3	3	1	1	10889	484	2		854	854	854		dcf007684d8598380507220e605e8e2c_3453	7ef7127a3f11d26e5ed74c78ba404004_4384	Pseudomonase_1_01096
mipA		scaffolding protein MipA	3	3	1	1	10872	484	1		746	746	746		dcf007684d8598380507220e605e8e2c_3455	7ef7127a3f11d26e5ed74c78ba404004_4382	Pseudomonase_1_01095
yeaH		YeaH/YhbH family protein	3	3	1	1	10875	324	36		1283	1283	1283		dcf007684d8598380507220e605e8e2c_3459	7ef7127a3f11d26e5ed74c78ba404004_4378	Pseudomonase_1_01093
dgcJ		putative diguanylate cyclase DgcJ	3	3	1	1	10873	324	38		1490	1490	1490		dcf007684d8598380507220e605e8e2c_3463	7ef7127a3f11d26e5ed74c78ba404004_4374	Pseudomonase_1_01091
ybjS		NAD(P)-dependent oxidoreductase	3	3	1	1	7441	331	4		1013	1049	1025		dcf007684d8598380507220e605e8e2c_1728	7ef7127a3f11d26e5ed74c78ba404004_6418	Pseudomonase_1_02051
yeaK		mischarged aminoacyl-tRNA deacylase	3	3	1	1	10392	324	35		503	503	503		dcf007684d8598380507220e605e8e2c_3465	7ef7127a3f11d26e5ed74c78ba404004_4372	Pseudomonase_1_01090
yeaL		DUF441 domain-containing protein	3	3	1	1	10393	324	34		446	446	446		dcf007684d8598380507220e605e8e2c_3469	7ef7127a3f11d26e5ed74c78ba404004_4368	Pseudomonase_1_01089
nimR		DNA-binding transcriptional regulator NimR	3	3	1	1	10394	324	33		818	821	820		dcf007684d8598380507220e605e8e2c_3471	7ef7127a3f11d26e5ed74c78ba404004_4366	Pseudomonase_1_01088
nimT		2-nitroimidazole transporter	3	3	1	1	10395	324	32		1181	1181	1181		dcf007684d8598380507220e605e8e2c_3473	7ef7127a3f11d26e5ed74c78ba404004_4364	Pseudomonase_1_01087
yeaO		DUF488 domain-containing protein	3	3	1	1	10396	324	31		347	347	347		dcf007684d8598380507220e605e8e2c_3475	7ef7127a3f11d26e5ed74c78ba404004_4362	Pseudomonase_1_01086
yoaF		DUF333 domain-containing lipoprotein YoaF	3	3	1	1	10397	324	30		254	254	254		dcf007684d8598380507220e605e8e2c_3477	7ef7127a3f11d26e5ed74c78ba404004_4360	Pseudomonase_1_01085
dgcP		diguanylate cyclase DgcP	3	3	1	1	10398	324	29		1025	1025	1025		dcf007684d8598380507220e605e8e2c_3479	7ef7127a3f11d26e5ed74c78ba404004_4358	Pseudomonase_1_01084
WP_001119729.1		DUF905 family protein	3	4	1.34	1	6006				89	233	197		dcf007684d8598380507220e605e8e2c_4061	7ef7127a3f11d26e5ed74c78ba404004_6167 7ef7127a3f11d26e5ed74c78ba404004_1637	Pseudomonase_1_03560
ybjX		VirK/YbjX family protein	3	3	1	1	7432	331	13		956	992	968		dcf007684d8598380507220e605e8e2c_1746	7ef7127a3f11d26e5ed74c78ba404004_6400	Pseudomonase_1_02042
yeaQ		GlsB/YeaQ/YmgE family stress response membrane protein	3	3	1	1	10401	324	28		248	248	248		dcf007684d8598380507220e605e8e2c_3485	7ef7127a3f11d26e5ed74c78ba404004_4352	Pseudomonase_1_01083
yoaG		DUF1869 domain-containing protein	3	3	1	1	10402	324	25		182	182	182		dcf007684d8598380507220e605e8e2c_3487	7ef7127a3f11d26e5ed74c78ba404004_4350	Pseudomonase_1_01082
yeaR		DUF1971 domain-containing protein YeaR	3	3	1	1	10403	324	24		359	359	359		dcf007684d8598380507220e605e8e2c_3489	7ef7127a3f11d26e5ed74c78ba404004_4348	Pseudomonase_1_01081
leuE		leucine efflux protein LeuE	3	3	1	1	10404	324	23		638	638	638		dcf007684d8598380507220e605e8e2c_3491	7ef7127a3f11d26e5ed74c78ba404004_4346	Pseudomonase_1_01080
rnd		ribonuclease D	3	3	1	1	10405	324	22		1115	1115	1115		dcf007684d8598380507220e605e8e2c_3497	7ef7127a3f11d26e5ed74c78ba404004_4340	Pseudomonase_1_01079
yeaY		Slp family lipoprotein YeaY	3	3	1	1	10407	324	20		581	581	581		dcf007684d8598380507220e605e8e2c_3501	7ef7127a3f11d26e5ed74c78ba404004_4336	Pseudomonase_1_01077
tsaB		tRNA (adenosine(37)-N6)-threonylcarbamoyltransferase complex dimerization subunit type 1 TsaB	3	3	1	1	10408	324	19		695	695	695		dcf007684d8598380507220e605e8e2c_3503	7ef7127a3f11d26e5ed74c78ba404004_4334	Pseudomonase_1_01076
yoaA		ATP-dependent DNA helicase	3	3	1	1	10409	324	18		1910	1910	1910		dcf007684d8598380507220e605e8e2c_3505	7ef7127a3f11d26e5ed74c78ba404004_4332	Pseudomonase_1_01075
WP_049094351.1		hypothetical protein	3	3	1	1	7425	331	21		203	311	239		dcf007684d8598380507220e605e8e2c_1764	7ef7127a3f11d26e5ed74c78ba404004_6382	Pseudomonase_1_02035
yoaC		DUF1889 family protein	3	3	1	1	10411	324	16		299	299	299		dcf007684d8598380507220e605e8e2c_3509	7ef7127a3f11d26e5ed74c78ba404004_4328	Pseudomonase_1_01073
yoaH		YoaH family protein	3	3	1	1	10412	324	15		179	179	179		dcf007684d8598380507220e605e8e2c_3511	7ef7127a3f11d26e5ed74c78ba404004_4326	Pseudomonase_1_01072
pabB		aminodeoxychorismate synthase component 1	3	3	1	1	10413	324	14		1361	1361	1361		dcf007684d8598380507220e605e8e2c_3513	7ef7127a3f11d26e5ed74c78ba404004_4324	Pseudomonase_1_01071
nudL		CoA pyrophosphatase	3	3	1	1	10414	324	13		578	578	578		dcf007684d8598380507220e605e8e2c_3515	7ef7127a3f11d26e5ed74c78ba404004_4322	Pseudomonase_1_01070
sdaA		L-serine ammonia-lyase	3	3	1	1	10415	324	12		1364	1364	1364		dcf007684d8598380507220e605e8e2c_3517	7ef7127a3f11d26e5ed74c78ba404004_4320	Pseudomonase_1_01069
pdeD		cyclic diguanylate phosphodiesterase	3	3	1	1	10416	324	11		1598	1598	1598		dcf007684d8598380507220e605e8e2c_3519	7ef7127a3f11d26e5ed74c78ba404004_4318	Pseudomonase_1_01068
yoaE		CNNM family cation transport protein YoaE	3	3	1	1	10417	324	10		1556	1556	1556		dcf007684d8598380507220e605e8e2c_3521	7ef7127a3f11d26e5ed74c78ba404004_4316	Pseudomonase_1_01067
manX		PTS mannose transporter subunit IIAB	3	3	1	1	10418	324	9		971	971	971		dcf007684d8598380507220e605e8e2c_3523	7ef7127a3f11d26e5ed74c78ba404004_4314	Pseudomonase_1_01066
manY		PTS mannose transporter subunit IIC	3	3	1	1	10419	324	8		800	800	800		dcf007684d8598380507220e605e8e2c_3525	7ef7127a3f11d26e5ed74c78ba404004_4312	Pseudomonase_1_01065
manZ		PTS mannose transporter subunit IID	3	3	1	1	10420	324	7		851	851	851		dcf007684d8598380507220e605e8e2c_3527	7ef7127a3f11d26e5ed74c78ba404004_4310	Pseudomonase_1_01064
focA		formate transporter FocA	3	3	1	1	5916	429	1		857	1196	970		dcf007684d8598380507220e605e8e2c_1827	7ef7127a3f11d26e5ed74c78ba404004_6108	Pseudomonase_1_02005
yobD		DUF986 family protein	3	3	1	1	10421	324	6		458	458	458		dcf007684d8598380507220e605e8e2c_3529	7ef7127a3f11d26e5ed74c78ba404004_4308	Pseudomonase_1_01063
mntP		manganese efflux pump MntP	3	3	1	1	10422	324	5		566	566	566		dcf007684d8598380507220e605e8e2c_3531	7ef7127a3f11d26e5ed74c78ba404004_4306	Pseudomonase_1_01062
rlmA		23S rRNA (guanine(745)-N(1))-methyltransferase	3	3	1	1	10423	324	4		809	809	809		dcf007684d8598380507220e605e8e2c_3533	7ef7127a3f11d26e5ed74c78ba404004_4304	Pseudomonase_1_01061
yebO		YebO family protein	3	3	1	1	10274	18	31		287	287	287		dcf007684d8598380507220e605e8e2c_3539	7ef7127a3f11d26e5ed74c78ba404004_4298	Pseudomonase_1_01059
yobH		YobH family protein	3	3	1	1	10272	18	29		239	239	239		dcf007684d8598380507220e605e8e2c_3543	7ef7127a3f11d26e5ed74c78ba404004_4294	Pseudomonase_1_01058
kdgR		DNA-binding transcriptional regulator KdgR	3	3	1	1	10271	18	28		791	791	791		dcf007684d8598380507220e605e8e2c_3545	7ef7127a3f11d26e5ed74c78ba404004_4292	Pseudomonase_1_01057
yebQ		MFS transporter	3	3	1	1	10245	18	27		1373	1373	1373		dcf007684d8598380507220e605e8e2c_3547	7ef7127a3f11d26e5ed74c78ba404004_4290	Pseudomonase_1_01056
htpX		protease HtpX	3	3	1	1	10246	18	26		881	881	881		dcf007684d8598380507220e605e8e2c_3549	7ef7127a3f11d26e5ed74c78ba404004_4288	Pseudomonase_1_01055
prc		carboxy terminal-processing peptidase	3	3	1	1	10247	18	25		2048	2048	2048		dcf007684d8598380507220e605e8e2c_3551	7ef7127a3f11d26e5ed74c78ba404004_4286	Pseudomonase_1_01054
helD		DNA helicase IV	3	3	1	1	5840	409	3		2054	2147	2085		dcf007684d8598380507220e605e8e2c_1929	7ef7127a3f11d26e5ed74c78ba404004_6006	Pseudomonase_1_01954
proQ		RNA chaperone ProQ	3	3	1	1	10248	18	24		698	698	698		dcf007684d8598380507220e605e8e2c_3553	7ef7127a3f11d26e5ed74c78ba404004_4284	Pseudomonase_1_01053
yebS		membrane integrity lipid transport subunit YebS	3	3	1	1	10250	18	22		1283	1283	1283		dcf007684d8598380507220e605e8e2c_3557	7ef7127a3f11d26e5ed74c78ba404004_4280	Pseudomonase_1_01051
yebT		lipid-binding membrane homeostasis protein YebT	3	3	1	1	10251	18	21		2633	2633	2633		dcf007684d8598380507220e605e8e2c_3559	7ef7127a3f11d26e5ed74c78ba404004_4278	Pseudomonase_1_01050
yebV		DUF1480 family protein	3	3	1	1	10253	18	19		236	236	236		dcf007684d8598380507220e605e8e2c_3563	7ef7127a3f11d26e5ed74c78ba404004_4274	Pseudomonase_1_01048
pphA		protein-serine/threonine phosphatase	3	3	1	1	10255	18	16		656	656	656		dcf007684d8598380507220e605e8e2c_3567	7ef7127a3f11d26e5ed74c78ba404004_4270	Pseudomonase_1_01046
yebY		YebY family protein	3	3	1	1	10256	18	15		341	341	341		dcf007684d8598380507220e605e8e2c_3569	7ef7127a3f11d26e5ed74c78ba404004_4268	Pseudomonase_1_01045
copD		copper homeostasis membrane protein CopD	3	3	1	1	10257	18	14		872	872	872		dcf007684d8598380507220e605e8e2c_3571	7ef7127a3f11d26e5ed74c78ba404004_4266	Pseudomonase_1_01044
yobA		CopC domain-containing protein YobA	3	3	1	1	10258	18	13		374	374	374		dcf007684d8598380507220e605e8e2c_3573	7ef7127a3f11d26e5ed74c78ba404004_4264	Pseudomonase_1_01043
holE		DNA polymerase III subunit theta	3	3	1	1	10259	18	12		230	230	230		dcf007684d8598380507220e605e8e2c_3575	7ef7127a3f11d26e5ed74c78ba404004_4262	Pseudomonase_1_01042
ycdZ		DUF1097 domain-containing protein	3	3	1	1	5727	312	11		491	521	501		dcf007684d8598380507220e605e8e2c_2105	7ef7127a3f11d26e5ed74c78ba404004_5878	Pseudomonase_1_01895
yobB		carbon-nitrogen hydrolase family protein	3	3	1	1	10260	18	11		656	656	656		dcf007684d8598380507220e605e8e2c_3577	7ef7127a3f11d26e5ed74c78ba404004_4260	Pseudomonase_1_01041
exoX		exodeoxyribonuclease X	3	3	1	1	10261	18	10		662	662	662		dcf007684d8598380507220e605e8e2c_3579	7ef7127a3f11d26e5ed74c78ba404004_4258	Pseudomonase_1_01040
ptrB		oligopeptidase B	3	3	1	1	10262	18	9		2060	2060	2060		dcf007684d8598380507220e605e8e2c_3581	7ef7127a3f11d26e5ed74c78ba404004_4256	Pseudomonase_1_01039
yebE		tellurite resistance TerB family protein	3	3	1	1	10263	18	8		659	659	659		dcf007684d8598380507220e605e8e2c_3583	7ef7127a3f11d26e5ed74c78ba404004_4254	Pseudomonase_1_01038
yebF		protein YebF	3	3	1	1	10264	18	7		356	356	356		dcf007684d8598380507220e605e8e2c_3585	7ef7127a3f11d26e5ed74c78ba404004_4252	Pseudomonase_1_01036
yebG		DNA damage-inducible protein YebG	3	3	1	1	10265	18	6		290	290	290		dcf007684d8598380507220e605e8e2c_3587	7ef7127a3f11d26e5ed74c78ba404004_4250	Pseudomonase_1_01035
purT		formate-dependent phosphoribosylglycinamide formyltransferase	3	3	1	1	10266	18	5		1178	1178	1178		dcf007684d8598380507220e605e8e2c_3589	7ef7127a3f11d26e5ed74c78ba404004_4248	Pseudomonase_1_01034
kdgA		bifunctional 4-hydroxy-2-oxoglutarate aldolase/2-dehydro-3-deoxy-phosphogluconate aldolase	3	3	1	1	10267	18	4		641	641	641		dcf007684d8598380507220e605e8e2c_3591	7ef7127a3f11d26e5ed74c78ba404004_4246	Pseudomonase_1_01033
edd		phosphogluconate dehydratase	3	3	1	1	10268	18	3		1811	1811	1811		dcf007684d8598380507220e605e8e2c_3593	7ef7127a3f11d26e5ed74c78ba404004_4244	Pseudomonase_1_01032
hexR		DNA-binding transcriptional regulator HexR	3	3	1	1	10270	533	2		869	869	869		dcf007684d8598380507220e605e8e2c_3597	7ef7127a3f11d26e5ed74c78ba404004_4240	Pseudomonase_1_01029
mdoG		glucans biosynthesis protein MdoG	3	3	1	1	5715	312	23		1502	1535	1524		dcf007684d8598380507220e605e8e2c_2129	7ef7127a3f11d26e5ed74c78ba404004_5854	Pseudomonase_1_01883
lpxM		lauroyl-Kdo(2)-lipid IV(A) myristoyltransferase	3	3	1	1	10241	461	1		971	971	971		dcf007684d8598380507220e605e8e2c_3601	7ef7127a3f11d26e5ed74c78ba404004_4236	Pseudomonase_1_01027
mepM		murein DD-endopeptidase MepM	3	3	1	1	10240	461	2		1322	1322	1322		dcf007684d8598380507220e605e8e2c_3603	7ef7127a3f11d26e5ed74c78ba404004_4234	Pseudomonase_1_01026
znuC		zinc ABC transporter ATP-binding protein ZnuC	3	3	1	1	10237	461	4		755	755	755		dcf007684d8598380507220e605e8e2c_3607	7ef7127a3f11d26e5ed74c78ba404004_4230	Pseudomonase_1_01024
znuB		zinc ABC transporter permease subunit ZnuB	3	3	1	1	10238	461	5		785	785	785		dcf007684d8598380507220e605e8e2c_3609	7ef7127a3f11d26e5ed74c78ba404004_4228	Pseudomonase_1_01023
yebB		YebB family permuted papain-like enzyme	3	3	1	1	10470	530	1		602	602	602		dcf007684d8598380507220e605e8e2c_3617	7ef7127a3f11d26e5ed74c78ba404004_4220	Pseudomonase_1_01020
yebC		YebC/PmpR family DNA-binding transcriptional regulator	3	3	1	1	10478	14	59		740	740	740		dcf007684d8598380507220e605e8e2c_3621	7ef7127a3f11d26e5ed74c78ba404004_4216	Pseudomonase_1_01018
nudB		dihydroneopterin triphosphate diphosphatase	3	3	1	1	10477	14	60		443	452	449		dcf007684d8598380507220e605e8e2c_3623	7ef7127a3f11d26e5ed74c78ba404004_4214	Pseudomonase_1_01017
aspS		aspartate--tRNA ligase	3	3	1	1	10476	14	61		1772	1772	1772		dcf007684d8598380507220e605e8e2c_3625	7ef7127a3f11d26e5ed74c78ba404004_4212	Pseudomonase_1_01016
yecD		hydrolase	3	3	1	1	10475	14	62		566	566	566		dcf007684d8598380507220e605e8e2c_3627	7ef7127a3f11d26e5ed74c78ba404004_4210	Pseudomonase_1_01015
yceF		7-methyl-GTP pyrophosphatase	3	3	1	1	5678	312	2		584	623	597		dcf007684d8598380507220e605e8e2c_2203	7ef7127a3f11d26e5ed74c78ba404004_5780	Pseudomonase_1_01846
yecE		DUF72 domain-containing protein	3	3	1	1	10474	14	63		818	818	818		dcf007684d8598380507220e605e8e2c_3629	7ef7127a3f11d26e5ed74c78ba404004_4208	Pseudomonase_1_01014
yecN		MAPEG family protein	3	3	1	1	10473	14	64		395	395	395		dcf007684d8598380507220e605e8e2c_3631	7ef7127a3f11d26e5ed74c78ba404004_4206	Pseudomonase_1_01013
cmoA		carboxy-S-adenosyl-L-methionine synthase CmoA	3	3	1	1	10472	14	65		743	743	743		dcf007684d8598380507220e605e8e2c_3633	7ef7127a3f11d26e5ed74c78ba404004_4204	Pseudomonase_1_01012
cmoB		tRNA 5-methoxyuridine(34)/uridine 5-oxyacetic acid(34) synthase CmoB	3	3	1	1	10471	14	66		971	971	971		dcf007684d8598380507220e605e8e2c_3635	7ef7127a3f11d26e5ed74c78ba404004_4202	Pseudomonase_1_01011
torZ		trimethylamine N-oxide reductase TorZ	3	3	1	1	2818	14	67		2429	2429	2429		dcf007684d8598380507220e605e8e2c_3637	7ef7127a3f11d26e5ed74c78ba404004_4200	Pseudomonase_1_01010
torY		NapC/NirT family cytochrome c	3	3	1	1	2819	14	68		1100	1100	1100		dcf007684d8598380507220e605e8e2c_3639	7ef7127a3f11d26e5ed74c78ba404004_4198	Pseudomonase_1_01009
cutC		copper homeostasis protein CutC	3	3	1	1	2820	14	69		746	746	746		dcf007684d8598380507220e605e8e2c_3641	7ef7127a3f11d26e5ed74c78ba404004_4196	Pseudomonase_1_01008
yecM		VOC family protein	3	3	1	1	2821	14	70		566	566	566		dcf007684d8598380507220e605e8e2c_3643	7ef7127a3f11d26e5ed74c78ba404004_4194	Pseudomonase_1_01007
argS		arginine--tRNA ligase	3	3	1	1	2822	14	71		1733	1733	1733		dcf007684d8598380507220e605e8e2c_3645	7ef7127a3f11d26e5ed74c78ba404004_4192	Pseudomonase_1_01006
flhe		flagellar protein FlhE	3	3	1	1	2823	14	72		392	392	392		dcf007684d8598380507220e605e8e2c_3647	7ef7127a3f11d26e5ed74c78ba404004_4190	Pseudomonase_1_01005
ycfL		YcfL family protein	3	3	1	1	519	352	5		353	377	369		dcf007684d8598380507220e605e8e2c_2237	7ef7127a3f11d26e5ed74c78ba404004_5746	Pseudomonase_1_09330
flhA		flagellar biosynthesis protein FlhA	3	3	1	1	2824	14	73		2078	2078	2078		dcf007684d8598380507220e605e8e2c_3649	7ef7127a3f11d26e5ed74c78ba404004_4188	Pseudomonase_1_01004
cheZ		protein phosphatase CheZ	3	3	1	1	2827	14	76		644	644	644		dcf007684d8598380507220e605e8e2c_3653	7ef7127a3f11d26e5ed74c78ba404004_4184	Pseudomonase_1_01001
cheY		chemotaxis response regulator CheY	3	3	1	1	2828	14	77		389	389	389		dcf007684d8598380507220e605e8e2c_3655	7ef7127a3f11d26e5ed74c78ba404004_4182	Pseudomonase_1_01000
cheB		protein-glutamate methylesterase/protein glutamine deamidase	3	3	1	1	2829	14	78		1049	1049	1049		dcf007684d8598380507220e605e8e2c_3657	7ef7127a3f11d26e5ed74c78ba404004_4180	Pseudomonase_1_00999
cheR		protein-glutamate O-methyltransferase CheR	3	3	1	1	2830	14	79		860	860	860		dcf007684d8598380507220e605e8e2c_3659	7ef7127a3f11d26e5ed74c78ba404004_4178	Pseudomonase_1_00998
tar		methyl-accepting chemotaxis protein II	3	3	1	1	2832	14	81		1661	1661	1661		dcf007684d8598380507220e605e8e2c_3663	7ef7127a3f11d26e5ed74c78ba404004_4174	Pseudomonase_1_00996
cheW		chemotaxis protein CheW	3	3	1	1	2833	14	82		503	503	503		dcf007684d8598380507220e605e8e2c_3665	7ef7127a3f11d26e5ed74c78ba404004_4172	Pseudomonase_1_00995
motB		flagellar motor protein MotB	3	3	1	1	2835	14	84		926	926	926		dcf007684d8598380507220e605e8e2c_3671	7ef7127a3f11d26e5ed74c78ba404004_4168	Pseudomonase_1_00993
motA		flagellar motor stator protein MotA	3	3	1	1	2836	14	85		887	887	887		dcf007684d8598380507220e605e8e2c_3673	7ef7127a3f11d26e5ed74c78ba404004_4166	Pseudomonase_1_00992
comR		TetR family copper-responsive transcriptional repressor ComR	3	3	1	1	526	352	12		632	710	658		dcf007684d8598380507220e605e8e2c_2251	7ef7127a3f11d26e5ed74c78ba404004_5732	Pseudomonase_1_09323
flhC		flagellar transcriptional regulator FlhC	3	3	1	1	2837	14	86		578	578	578		dcf007684d8598380507220e605e8e2c_3675	7ef7127a3f11d26e5ed74c78ba404004_4164	Pseudomonase_1_00991
flhD		flagellar transcriptional regulator FlhD	3	3	1	1	2838	14	87		350	350	350		dcf007684d8598380507220e605e8e2c_3677	7ef7127a3f11d26e5ed74c78ba404004_4162	Pseudomonase_1_00990
uspC		universal stress protein UspC	3	3	1	1	2839	14	88		428	428	428		dcf007684d8598380507220e605e8e2c_3679	7ef7127a3f11d26e5ed74c78ba404004_4160	Pseudomonase_1_00989
otsA		alpha,alpha-trehalose-phosphate synthase	3	3	1	1	2840	14	89		1424	1424	1424		dcf007684d8598380507220e605e8e2c_3681	7ef7127a3f11d26e5ed74c78ba404004_4158	Pseudomonase_1_00988
otsB		trehalose-phosphatase	3	3	1	1	2841	14	90		800	800	800		dcf007684d8598380507220e605e8e2c_3683	7ef7127a3f11d26e5ed74c78ba404004_4156	Pseudomonase_1_00987
araH		arabinose ABC transporter permease AraH	3	3	1	1	2842	14	58		986	986	986		dcf007684d8598380507220e605e8e2c_3685	7ef7127a3f11d26e5ed74c78ba404004_4154	Pseudomonase_1_00986
araG		arabinose ABC transporter ATP-binding protein AraG	3	3	1	1	2843	14	57		1514	1514	1514		dcf007684d8598380507220e605e8e2c_3687	7ef7127a3f11d26e5ed74c78ba404004_4152	Pseudomonase_1_00985
araF		arabinose ABC transporter substrate-binding protein AraF	3	3	1	1	2844	14	56		989	989	989		dcf007684d8598380507220e605e8e2c_3689	7ef7127a3f11d26e5ed74c78ba404004_4150	Pseudomonase_1_00984
ftnB		non-heme ferritin-like protein	3	3	1	1	2845	14	55		503	503	503		dcf007684d8598380507220e605e8e2c_3691	7ef7127a3f11d26e5ed74c78ba404004_4148	Pseudomonase_1_00983
yecJ		DUF2766 domain-containing protein	3	3	1	1	2846	14	54		251	251	251		dcf007684d8598380507220e605e8e2c_3693	7ef7127a3f11d26e5ed74c78ba404004_4146	Pseudomonase_1_00982
pdeG_1		cyclic diguanylate phosphodiesterase	3	3	1	1	792	364	14		851	893	879		dcf007684d8598380507220e605e8e2c_2331	7ef7127a3f11d26e5ed74c78ba404004_5510	Pseudomonase_1_04655
yecR		YecR-like lipofamily protein	3	3	1	1	2848	14	53		323	323	323		dcf007684d8598380507220e605e8e2c_3697	7ef7127a3f11d26e5ed74c78ba404004_4142	Pseudomonase_1_00981
ftnA		non-heme ferritin	3	3	1	1	2849	14	52		497	497	497		dcf007684d8598380507220e605e8e2c_3699	7ef7127a3f11d26e5ed74c78ba404004_4140	Pseudomonase_1_00980
yecH		YecH family protein	3	3	1	1	2850	14	51		239	239	239		dcf007684d8598380507220e605e8e2c_3701	7ef7127a3f11d26e5ed74c78ba404004_4138	Pseudomonase_1_00979
tyrP		tyrosine transporter TyrP	3	3	1	1	2851	14	50		1211	1211	1211		dcf007684d8598380507220e605e8e2c_3703	7ef7127a3f11d26e5ed74c78ba404004_4136	Pseudomonase_1_00978
yecA		UPF0149 family protein YecA	3	3	1	1	2852	14	49		665	665	665		dcf007684d8598380507220e605e8e2c_3705	7ef7127a3f11d26e5ed74c78ba404004_4134	Pseudomonase_1_00977
pgsA		CDP-diacylglycerol--glycerol-3-phosphate 3-phosphatidyltransferase	3	3	1	1	10681	14	48		548	548	548		dcf007684d8598380507220e605e8e2c_3716	7ef7127a3f11d26e5ed74c78ba404004_4123	Pseudomonase_1_00951
uvrY		UvrY/SirA/GacA family response regulator transcription factor	3	3	1	1	10680	373	2		656	656	656		dcf007684d8598380507220e605e8e2c_3720	7ef7127a3f11d26e5ed74c78ba404004_4119	Pseudomonase_1_00949
yecF		DUF2594 family protein	3	3	1	1	10679	373	3		224	224	224		dcf007684d8598380507220e605e8e2c_3724	7ef7127a3f11d26e5ed74c78ba404004_4115	Pseudomonase_1_00948
cbeA_4		type IV toxin-antitoxin system YeeU family antitoxin	3	5	1.67	1	4499				368	428	380		dcf007684d8598380507220e605e8e2c_4101	7ef7127a3f11d26e5ed74c78ba404004_3754 7ef7127a3f11d26e5ed74c78ba404004_8621	Pseudomonase_1_00018 Pseudomonase_1_09903
ymgF		hypothetical protein	3	3	1	1	791	364	13		218	254	230		dcf007684d8598380507220e605e8e2c_2333	7ef7127a3f11d26e5ed74c78ba404004_5508	Pseudomonase_1_04656
sdiA		transcriptional regulator SdiA	3	3	1	1	10678	373	4		722	722	722		dcf007684d8598380507220e605e8e2c_3726	7ef7127a3f11d26e5ed74c78ba404004_4113	Pseudomonase_1_00947
yecC		L-cystine ABC transporter ATP-binding protein YecC	3	3	1	1	10677	373	5		752	752	752		dcf007684d8598380507220e605e8e2c_3728	7ef7127a3f11d26e5ed74c78ba404004_4111	Pseudomonase_1_00946
tcyL		cystine ABC transporter permease	3	3	1	1	10676	373	6		668	668	668		dcf007684d8598380507220e605e8e2c_3730	7ef7127a3f11d26e5ed74c78ba404004_4109	Pseudomonase_1_00945
dcyD		D-cysteine desulfhydrase	3	3	1	1	10675	373	7		986	986	986		dcf007684d8598380507220e605e8e2c_3732	7ef7127a3f11d26e5ed74c78ba404004_4107	Pseudomonase_1_00944
fliZ		flagella biosynthesis regulatory protein FliZ	3	3	1	1	10003	373	9		551	551	551		dcf007684d8598380507220e605e8e2c_3736	7ef7127a3f11d26e5ed74c78ba404004_4103	Pseudomonase_1_00942
fliA		RNA polymerase sigma factor FliA	3	3	1	1	10004	373	10		719	719	719		dcf007684d8598380507220e605e8e2c_3738	7ef7127a3f11d26e5ed74c78ba404004_4101	Pseudomonase_1_00941
WP_000079710.1		FliC/FljB family flagellin	3	3	1	1	10005	373	11		1667	1667	1667		dcf007684d8598380507220e605e8e2c_3740	7ef7127a3f11d26e5ed74c78ba404004_4099	Pseudomonase_1_00940
fliD		flagellar filament capping protein FliD	3	3	1	1	10006	373	12		1406	1406	1406		dcf007684d8598380507220e605e8e2c_3742	7ef7127a3f11d26e5ed74c78ba404004_4097	Pseudomonase_1_00939
fliS		flagellar export chaperone FliS	3	3	1	1	10007	373	13		410	410	410		dcf007684d8598380507220e605e8e2c_3744	7ef7127a3f11d26e5ed74c78ba404004_4095	Pseudomonase_1_00938
fliT		flagella biosynthesis regulatory protein FliT	3	3	1	1	10008	373	14		365	365	365		dcf007684d8598380507220e605e8e2c_3746	7ef7127a3f11d26e5ed74c78ba404004_4093	Pseudomonase_1_00937
WP_229459057.1		autotransporter outer membrane beta-barrel domain-containing protein	3	3	1	1	10301	364	11		527	587	567		dcf007684d8598380507220e605e8e2c_2339	7ef7127a3f11d26e5ed74c78ba404004_5502	Pseudomonase_1_04658
amyA		alpha-amylase	3	3	1	1	10009	373	15		1487	1487	1487		dcf007684d8598380507220e605e8e2c_3748	7ef7127a3f11d26e5ed74c78ba404004_4091	Pseudomonase_1_00936
yedD		lipoprotein	3	3	1	1	10010	373	16		413	413	413		dcf007684d8598380507220e605e8e2c_3750	7ef7127a3f11d26e5ed74c78ba404004_4089	Pseudomonase_1_00935
yedE		selenium metabolism membrane protein YedE/FdhT	3	3	1	1	10011	373	17		1205	1205	1205		dcf007684d8598380507220e605e8e2c_3752	7ef7127a3f11d26e5ed74c78ba404004_4087	Pseudomonase_1_00934
yedK		SOS response-associated peptidase	3	3	1	1	10075	313	15		668	668	668		dcf007684d8598380507220e605e8e2c_3756	7ef7127a3f11d26e5ed74c78ba404004_4083	Pseudomonase_1_00932
WP_000737290.1		porin OmpD	3	3	1	1	10076	313	16		1082	1082	1082		dcf007684d8598380507220e605e8e2c_3758	7ef7127a3f11d26e5ed74c78ba404004_4081	Pseudomonase_1_00931
ybcM		helix-turn-helix transcriptional regulator	3	3	1	1	10078	313	18		797	797	797		dcf007684d8598380507220e605e8e2c_3762	7ef7127a3f11d26e5ed74c78ba404004_4077	Pseudomonase_1_00930
ybcL		Raf kinase inhibitor-like protein YbcL	3	3	1	1	10079	313	19		551	551	551		dcf007684d8598380507220e605e8e2c_3764	7ef7127a3f11d26e5ed74c78ba404004_4075	Pseudomonase_1_00929
emrE		SMR family multidrug efflux protein EmrE	3	3	1	1	10080	313	20		332	332	332		dcf007684d8598380507220e605e8e2c_3766	7ef7127a3f11d26e5ed74c78ba404004_4073	Pseudomonase_1_00928
fliE		flagellar hook-basal body complex protein FliE	3	3	1	1	10081	313	21		314	314	314		dcf007684d8598380507220e605e8e2c_3768	7ef7127a3f11d26e5ed74c78ba404004_4071	Pseudomonase_1_00927
ymgG		glycine zipper domain-containing protein	3	3	1	1	10303	364	8		284	344	324		dcf007684d8598380507220e605e8e2c_2343	7ef7127a3f11d26e5ed74c78ba404004_5498	Pseudomonase_1_04660
fliF		flagellar M-ring protein FliF	3	3	1	1	10082	313	22		1658	1658	1658		dcf007684d8598380507220e605e8e2c_3770	7ef7127a3f11d26e5ed74c78ba404004_4069	Pseudomonase_1_00926
fliG		flagellar motor switch protein FliG	3	3	1	1	10083	313	23		995	995	995		dcf007684d8598380507220e605e8e2c_3772	7ef7127a3f11d26e5ed74c78ba404004_4067	Pseudomonase_1_00925
fliH		flagellar assembly protein FliH	3	3	1	1	10084	313	24		686	686	686		dcf007684d8598380507220e605e8e2c_3774	7ef7127a3f11d26e5ed74c78ba404004_4065	Pseudomonase_1_00924
fliI		flagellum-specific ATP synthase FliI	3	3	1	1	10085	313	25		1373	1373	1373		dcf007684d8598380507220e605e8e2c_3776	7ef7127a3f11d26e5ed74c78ba404004_4063	Pseudomonase_1_00923
fliJ		flagella biosynthesis chaperone FliJ	3	3	1	1	10086	313	26		443	443	443		dcf007684d8598380507220e605e8e2c_3778	7ef7127a3f11d26e5ed74c78ba404004_4061	Pseudomonase_1_00922
fliK		flagellar hook length control protein FliK	3	3	1	1	10087	313	27		1127	1127	1127		dcf007684d8598380507220e605e8e2c_3780	7ef7127a3f11d26e5ed74c78ba404004_4059	Pseudomonase_1_00921
fliL		flagellar basal body-associated protein FliL	3	3	1	1	10088	313	28		464	464	464		dcf007684d8598380507220e605e8e2c_3782	7ef7127a3f11d26e5ed74c78ba404004_4057	Pseudomonase_1_00920
fliM		flagellar motor switch protein FliM	3	3	1	1	10089	313	29		1004	1004	1004		dcf007684d8598380507220e605e8e2c_3784	7ef7127a3f11d26e5ed74c78ba404004_4055	Pseudomonase_1_00919
fliN		flagellar motor switch protein FliN	3	3	1	1	10090	313	30		413	413	413		dcf007684d8598380507220e605e8e2c_3786	7ef7127a3f11d26e5ed74c78ba404004_4053	Pseudomonase_1_00918
fliO		flagellar type III secretion system protein FliO	3	3	1	1	10091	313	31		365	365	365		dcf007684d8598380507220e605e8e2c_3788	7ef7127a3f11d26e5ed74c78ba404004_4051	Pseudomonase_1_00917
hlyE		hemolysin HlyE	3	3	1	1	10292	326	8		260	317	298		dcf007684d8598380507220e605e8e2c_2369	7ef7127a3f11d26e5ed74c78ba404004_5472	Pseudomonase_1_04671
fliP		flagellar type III secretion system pore protein FliP	3	3	1	1	10092	313	32		737	737	737		dcf007684d8598380507220e605e8e2c_3790	7ef7127a3f11d26e5ed74c78ba404004_4049	Pseudomonase_1_00916
fliQ		flagellar biosynthesis protein FliQ	3	3	1	1	10093	313	33		269	269	269		dcf007684d8598380507220e605e8e2c_3792	7ef7127a3f11d26e5ed74c78ba404004_4047	Pseudomonase_1_00915
fliR		flagellar type III secretion system protein FliR	3	3	1	1	10094	313	34		785	785	785		dcf007684d8598380507220e605e8e2c_3794	7ef7127a3f11d26e5ed74c78ba404004_4045	Pseudomonase_1_00914
rcsA		transcriptional regulator RcsA	3	3	1	1	10095	313	35		623	623	623		dcf007684d8598380507220e605e8e2c_3796	7ef7127a3f11d26e5ed74c78ba404004_4043	Pseudomonase_1_00913
dsrB		protein DsrB	3	3	1	1	10096	313	36		188	188	188		dcf007684d8598380507220e605e8e2c_3798	7ef7127a3f11d26e5ed74c78ba404004_4041	Pseudomonase_1_00912
yodD		peroxide/acid resistance protein YodD	3	3	1	1	10097	313	37		227	227	227		dcf007684d8598380507220e605e8e2c_3800	7ef7127a3f11d26e5ed74c78ba404004_4039	Pseudomonase_1_00911
yedQ		cellulose biosynthesis regulator YedQ	3	3	1	1	10099	313	39		1694	1694	1694		dcf007684d8598380507220e605e8e2c_3804	7ef7127a3f11d26e5ed74c78ba404004_4035	Pseudomonase_1_00909
yodC		DUF2158 domain-containing protein	3	3	1	1	10100	313	40		182	182	182		dcf007684d8598380507220e605e8e2c_3806	7ef7127a3f11d26e5ed74c78ba404004_4033	Pseudomonase_1_00908
yedI		DUF808 domain-containing protein	3	3	1	1	10101	313	41		917	917	917		dcf007684d8598380507220e605e8e2c_3808	7ef7127a3f11d26e5ed74c78ba404004_4031	Pseudomonase_1_00907
yedA		drug/metabolite exporter YedA	3	3	1	1	10102	313	42		920	920	920		dcf007684d8598380507220e605e8e2c_3810	7ef7127a3f11d26e5ed74c78ba404004_4029	Pseudomonase_1_00906
chaC		glutathione-specific gamma-glutamylcyclotransferase	3	3	1	1	8484	388	12		695	716	702		dcf007684d8598380507220e605e8e2c_2453	7ef7127a3f11d26e5ed74c78ba404004_5388	Pseudomonase_1_04712
vsr		VSPR family DNA mismatch endonuclease	3	3	1	1	10103	313	43		470	470	470		dcf007684d8598380507220e605e8e2c_3812	7ef7127a3f11d26e5ed74c78ba404004_4027	Pseudomonase_1_00905
dcm		DNA-cytosine methyltransferase	3	3	1	1	10104	313	44		1418	1418	1418		dcf007684d8598380507220e605e8e2c_3814	7ef7127a3f11d26e5ed74c78ba404004_4025	Pseudomonase_1_00904
yedJ		phosphohydrolase	3	3	1	1	10106	313	45		695	695	695		dcf007684d8598380507220e605e8e2c_3816	7ef7127a3f11d26e5ed74c78ba404004_4023	Pseudomonase_1_00903
WP_000824392.1		porin	3	3	1	1	10107	313	47		1058	1058	1058		dcf007684d8598380507220e605e8e2c_3820	7ef7127a3f11d26e5ed74c78ba404004_4019	Pseudomonase_1_00902
hchA		protein deglycase HchA	3	3	1	1	10108	313	48		851	851	851		dcf007684d8598380507220e605e8e2c_3822	7ef7127a3f11d26e5ed74c78ba404004_4017	Pseudomonase_1_00901
hprS		two-component system sensor histidine kinase HprS	3	3	1	1	10109	313	49		1358	1358	1358		dcf007684d8598380507220e605e8e2c_3824	7ef7127a3f11d26e5ed74c78ba404004_4015	Pseudomonase_1_00900
hiuH		hydroxyisourate hydrolase	3	3	1	1	10111	313	51		413	413	413		dcf007684d8598380507220e605e8e2c_3828	7ef7127a3f11d26e5ed74c78ba404004_4011	Pseudomonase_1_00898
msrP		protein-methionine-sulfoxide reductase catalytic subunit MsrP	3	3	1	1	10112	313	52		1004	1004	1004		dcf007684d8598380507220e605e8e2c_3830	7ef7127a3f11d26e5ed74c78ba404004_4009	Pseudomonase_1_00897
msrQ		protein-methionine-sulfoxide reductase heme-binding subunit MsrQ	3	3	1	1	10113	313	53		635	635	635		dcf007684d8598380507220e605e8e2c_3832	7ef7127a3f11d26e5ed74c78ba404004_4007	Pseudomonase_1_00896
ychO		inverse autotransporter invasin YchO	3	3	1	1	8482	388	10		1253	1394	1347		dcf007684d8598380507220e605e8e2c_2457	7ef7127a3f11d26e5ed74c78ba404004_5384	Pseudomonase_1_04714
zinT		metal-binding protein ZinT	3	3	1	1	10114	313	54		650	650	650		dcf007684d8598380507220e605e8e2c_3834	7ef7127a3f11d26e5ed74c78ba404004_4005	Pseudomonase_1_00895
WP_001298509.1		site-specific integrase	3	3	1	1	10115	313	55		1220	1220	1220		dcf007684d8598380507220e605e8e2c_3836	7ef7127a3f11d26e5ed74c78ba404004_4003	Pseudomonase_1_00894
pilV		shufflon system plasmid conjugative transfer pilus tip adhesin PilV	3	3	1	1	10117	313	14		1463	1463	1463		dcf007684d8598380507220e605e8e2c_3840	7ef7127a3f11d26e5ed74c78ba404004_3999	Pseudomonase_1_00892
traD		conjugal transfer protein TraD	3	3	1	1	10119	313	12		305	305	305		dcf007684d8598380507220e605e8e2c_3846	7ef7127a3f11d26e5ed74c78ba404004_3995	Pseudomonase_1_00890
WP_000964096.1		MobA/MobL family protein	3	3	1	1	10120	313	11		1502	1502	1502		dcf007684d8598380507220e605e8e2c_3848	7ef7127a3f11d26e5ed74c78ba404004_3993	Pseudomonase_1_00889
tcpC		NAD(+) hydrolase TcpC	3	3	1	1	10121	313	10		923	923	923		dcf007684d8598380507220e605e8e2c_3850	7ef7127a3f11d26e5ed74c78ba404004_3991	Pseudomonase_1_00888
WP_000122165.1		TIR domain-containing protein	3	3	1	1	10122	313	9		509	509	509		dcf007684d8598380507220e605e8e2c_3852	7ef7127a3f11d26e5ed74c78ba404004_3989	Pseudomonase_1_00887
WP_001151469.1		DUF6430 domain-containing protein	3	3	1	1	10123	313	8		836	836	836		dcf007684d8598380507220e605e8e2c_3854	7ef7127a3f11d26e5ed74c78ba404004_3987	Pseudomonase_1_00886
WP_000430097.1		hypothetical protein	3	3	1	1	10124	313	7		275	275	275		dcf007684d8598380507220e605e8e2c_3856	7ef7127a3f11d26e5ed74c78ba404004_3985	Pseudomonase_1_00885
WP_000722536.1		lipoprotein	3	3	1	1	10125	313	6		530	530	530		dcf007684d8598380507220e605e8e2c_3858	7ef7127a3f11d26e5ed74c78ba404004_3983	Pseudomonase_1_00884
rssA		patatin-like phospholipase RssA	3	3	1	1	8580	448	5		905	944	918		dcf007684d8598380507220e605e8e2c_2488	7ef7127a3f11d26e5ed74c78ba404004_5353	Pseudomonase_1_04727
WP_001298513.1		DUF4755 domain-containing protein	3	3	1	1	10126	313	5		473	473	473		dcf007684d8598380507220e605e8e2c_3860	7ef7127a3f11d26e5ed74c78ba404004_3981	Pseudomonase_1_00883
WP_001351135.1		hypothetical protein	3	3	1	1	10127	313	4		170	170	170		dcf007684d8598380507220e605e8e2c_3862	7ef7127a3f11d26e5ed74c78ba404004_3979	Pseudomonase_1_00882
WP_001120270.1		helix-hairpin-helix domain-containing protein	3	3	1	1	10128	313	3		1172	1172	1172		dcf007684d8598380507220e605e8e2c_3864	7ef7127a3f11d26e5ed74c78ba404004_3977	Pseudomonase_1_00881
WP_000398601.1		hypothetical protein	3	3	1	1	10129	313	2		962	962	962		dcf007684d8598380507220e605e8e2c_3866	7ef7127a3f11d26e5ed74c78ba404004_3975	Pseudomonase_1_00880
WP_001233369.1		DUF4756 family protein	3	3	1	1	10132	4	6		479	479	479		dcf007684d8598380507220e605e8e2c_3872	7ef7127a3f11d26e5ed74c78ba404004_3969	Pseudomonase_1_00876
WP_001287374.1		H-NS histone family protein	3	3	1	1	10133	4	7		404	404	404		dcf007684d8598380507220e605e8e2c_3874	7ef7127a3f11d26e5ed74c78ba404004_3967	Pseudomonase_1_00875
WP_000505229.1		DUF6404 family protein	3	3	1	1	10134	4	8		350	350	350		dcf007684d8598380507220e605e8e2c_3876	7ef7127a3f11d26e5ed74c78ba404004_3965	Pseudomonase_1_00874
WP_000564596.1		hypothetical protein	3	3	1	1	10135	4	9		242	242	242		dcf007684d8598380507220e605e8e2c_3878	7ef7127a3f11d26e5ed74c78ba404004_3963	Pseudomonase_1_00873
WP_001091321.1		hypothetical protein	3	3	1	1	10136	4	10		296	296	296		dcf007684d8598380507220e605e8e2c_3880	7ef7127a3f11d26e5ed74c78ba404004_3961	Pseudomonase_1_00872
WP_000687678.1		hypothetical protein	3	3	1	1	10137	4	11		290	290	290		dcf007684d8598380507220e605e8e2c_3882	7ef7127a3f11d26e5ed74c78ba404004_3959	Pseudomonase_1_00871
oppA		oligopeptide ABC transporter substrate-binding protein OppA	3	3	1	1	8144	478	3		1631	1676	1646		dcf007684d8598380507220e605e8e2c_2508	7ef7127a3f11d26e5ed74c78ba404004_5335	Pseudomonase_1_04737
WP_001298701.1		AlpA family transcriptional regulator	3	3	1	1	10138	4	12		218	218	218		dcf007684d8598380507220e605e8e2c_3884	7ef7127a3f11d26e5ed74c78ba404004_3957	Pseudomonase_1_00870
WP_000830396.1		DUF6387 family protein	3	3	1	1	10139	4	13		836	836	836		dcf007684d8598380507220e605e8e2c_3886	7ef7127a3f11d26e5ed74c78ba404004_3955	Pseudomonase_1_00869
mtfA		DgsA anti-repressor MtfA	3	3	1	1	10140	4	14		797	797	797		dcf007684d8598380507220e605e8e2c_3891	7ef7127a3f11d26e5ed74c78ba404004_3950	Pseudomonase_1_00867
ybtS		yersiniabactin biosynthesis salicylate synthase Irp9/YbtS	3	3	1	1	10142	4	16		1304	1304	1304		dcf007684d8598380507220e605e8e2c_3898	7ef7127a3f11d26e5ed74c78ba404004_3943	Pseudomonase_1_00864
ybtX		yersiniabactin-associated zinc MFS transporter YbtX	3	3	1	1	10143	4	17		1280	1280	1280		dcf007684d8598380507220e605e8e2c_3900	7ef7127a3f11d26e5ed74c78ba404004_3941	Pseudomonase_1_00863
ybtQ		yersiniabactin ABC transporter ATP-binding/permease protein YbtQ	3	3	1	1	10144	4	18		1802	1802	1802		dcf007684d8598380507220e605e8e2c_3902	7ef7127a3f11d26e5ed74c78ba404004_3939	Pseudomonase_1_00862
ybtA		yersiniabactin transcriptional regulator YbtA	3	3	1	1	10146	4	20		959	959	959		dcf007684d8598380507220e605e8e2c_3906	7ef7127a3f11d26e5ed74c78ba404004_3935	Pseudomonase_1_00860
irp2		yersiniabactin non-ribosomal peptide synthetase HMWP2	3	3	1	1	10147	4	21		6107	6107	6107		dcf007684d8598380507220e605e8e2c_3908	7ef7127a3f11d26e5ed74c78ba404004_3933	Pseudomonase_1_00859
irp1		yersiniabactin polyketide synthase HMWP1	3	3	1	1	10148	4	22		9491	9491	9491		dcf007684d8598380507220e605e8e2c_3910	7ef7127a3f11d26e5ed74c78ba404004_3931	Pseudomonase_1_00858
ybtU		yersiniabactin biosynthesis oxidoreductase YbtU	3	3	1	1	10149	4	23		1100	1100	1100		dcf007684d8598380507220e605e8e2c_3912	7ef7127a3f11d26e5ed74c78ba404004_3929	Pseudomonase_1_00857
yciY		YciY family protein	3	3	1	1	8174	309	5		173	284	210		dcf007684d8598380507220e605e8e2c_2522	7ef7127a3f11d26e5ed74c78ba404004_5321	Pseudomonase_1_04744
ybtT		yersiniabactin biosynthesis thioesterase YbtT	3	3	1	1	10150	4	24		803	803	803		dcf007684d8598380507220e605e8e2c_3914	7ef7127a3f11d26e5ed74c78ba404004_3927	Pseudomonase_1_00856
ybtE		yersiniabactin biosynthesis salycil-AMP ligase YbtE	3	3	1	1	10151	4	25		1577	1577	1577		dcf007684d8598380507220e605e8e2c_3916	7ef7127a3f11d26e5ed74c78ba404004_3925	Pseudomonase_1_00855
fyuA		siderophore yersiniabactin receptor FyuA	3	3	1	1	10152	4	26		2021	2021	2021		dcf007684d8598380507220e605e8e2c_3918	7ef7127a3f11d26e5ed74c78ba404004_3923	Pseudomonase_1_00854
WP_000039786.1		inverse autotransporter beta domain-containing protein	3	3	1	1	10154	4	27		749	749	749		dcf007684d8598380507220e605e8e2c_3920	7ef7127a3f11d26e5ed74c78ba404004_3921	Pseudomonase_1_00853
WP_000480495.1		glycosyltransferase family 9 protein	3	3	1	1	10156	4	30		1052	1052	1052		dcf007684d8598380507220e605e8e2c_3924	7ef7127a3f11d26e5ed74c78ba404004_3917	Pseudomonase_1_00850
shiA		shikimate transporter	3	3	1	1	10157	4	31		1316	1316	1316		dcf007684d8598380507220e605e8e2c_3926	7ef7127a3f11d26e5ed74c78ba404004_3915	Pseudomonase_1_00849
amn		AMP nucleosidase	3	3	1	1	10158	4	32		1454	1454	1454		dcf007684d8598380507220e605e8e2c_3928	7ef7127a3f11d26e5ed74c78ba404004_3913	Pseudomonase_1_00848
yeeN		YebC/PmpR family DNA-binding transcriptional regulator	3	3	1	1	10200	4	45		716	716	716		dcf007684d8598380507220e605e8e2c_3930	7ef7127a3f11d26e5ed74c78ba404004_3911	Pseudomonase_1_00847
nac		nitrogen assimilation transcriptional regulator NAC	3	3	1	1	10199	4	120		917	917	917		dcf007684d8598380507220e605e8e2c_3935	7ef7127a3f11d26e5ed74c78ba404004_3906	Pseudomonase_1_00816
cbl		HTH-type transcriptional regulator Cbl	3	3	1	1	10198	4	121		950	950	950		dcf007684d8598380507220e605e8e2c_3937	7ef7127a3f11d26e5ed74c78ba404004_3904	Pseudomonase_1_00815
yciI		YciI family protein	3	3	1	1	8172	309	7		296	392	328		dcf007684d8598380507220e605e8e2c_2526	7ef7127a3f11d26e5ed74c78ba404004_5317	Pseudomonase_1_04746
WP_000055670.1		tyrosine-type recombinase/integrase	3	3	1	1	10196	4	123		1271	1271	1271		dcf007684d8598380507220e605e8e2c_3947	7ef7127a3f11d26e5ed74c78ba404004_3894	Pseudomonase_1_00811
clbS		colibactin self-protection protein ClbS	3	3	1	1	10195	4	124		512	512	512		dcf007684d8598380507220e605e8e2c_3949	7ef7127a3f11d26e5ed74c78ba404004_3892	Pseudomonase_1_00810
clbQ		colibactin biosynthesis thioesterase ClbQ	3	3	1	1	10194	4	125		722	722	722		dcf007684d8598380507220e605e8e2c_3951	7ef7127a3f11d26e5ed74c78ba404004_3890	Pseudomonase_1_00809
clbP		precolibactin peptidase ClbP	3	3	1	1	10193	4	126		1505	1514	1511		dcf007684d8598380507220e605e8e2c_3953	7ef7127a3f11d26e5ed74c78ba404004_3888	Pseudomonase_1_00808
clbO		colibactin polyketide synthase ClbO	3	3	1	1	10192	4	127		2459	2459	2459		dcf007684d8598380507220e605e8e2c_3955	7ef7127a3f11d26e5ed74c78ba404004_3886	Pseudomonase_1_00807
clbN		colibactin non-ribosomal peptide synthetase ClbN	3	3	1	1	10191	4	128		4367	4367	4367		dcf007684d8598380507220e605e8e2c_3957	7ef7127a3f11d26e5ed74c78ba404004_3884	Pseudomonase_1_00806
clbM		precolibactin export MATE transporter ClbM	3	3	1	1	10190	4	129		1439	1439	1439		dcf007684d8598380507220e605e8e2c_3959	7ef7127a3f11d26e5ed74c78ba404004_3882	Pseudomonase_1_00805
clbL		colibactin biosynthesis amidase ClbL	3	3	1	1	10189	4	130		1463	1463	1463		dcf007684d8598380507220e605e8e2c_3961	7ef7127a3f11d26e5ed74c78ba404004_3880	Pseudomonase_1_00804
clbI		colibactin polyketide synthase ClbI	3	3	1	1	10185	4	134		3032	3032	3032		dcf007684d8598380507220e605e8e2c_3967	7ef7127a3f11d26e5ed74c78ba404004_3874	Pseudomonase_1_08511
clbH		colibactin non-ribosomal peptide synthetase ClbH	3	3	1	1	10180	4	135		4796	4796	4796		dcf007684d8598380507220e605e8e2c_3969	7ef7127a3f11d26e5ed74c78ba404004_3872	Pseudomonase_1_08510
dsdX		D-serine transporter DsdX	3	5	1.67	1	675				218	1337	668		dcf007684d8598380507220e605e8e2c_4885	7ef7127a3f11d26e5ed74c78ba404004_3068 7ef7127a3f11d26e5ed74c78ba404004_8703	Pseudomonase_1_00356 Pseudomonase_1_00781
yciA		acyl-CoA thioester hydrolase YciA	3	3	1	1	8170	309	10		344	398	380		dcf007684d8598380507220e605e8e2c_2530	7ef7127a3f11d26e5ed74c78ba404004_5313	Pseudomonase_1_04748
clbG		colibactin biosynthesis acyltransferase ClbG	3	3	1	1	10179	4	136		1268	1268	1268		dcf007684d8598380507220e605e8e2c_3971	7ef7127a3f11d26e5ed74c78ba404004_3870	Pseudomonase_1_08509
clbF		colibactin biosynthesis dehydrogenase ClbF	3	3	1	1	10178	4	137		1130	1130	1130		dcf007684d8598380507220e605e8e2c_3973	7ef7127a3f11d26e5ed74c78ba404004_3868	Pseudomonase_1_08508
clbE		colibactin biosynthesis aminomalonyl-acyl carrier protein ClbE	3	3	1	1	10177	4	138		248	248	248		dcf007684d8598380507220e605e8e2c_3975	7ef7127a3f11d26e5ed74c78ba404004_3866	Pseudomonase_1_08507
clbD		colibactin biosynthesis dehydrogenase ClbD	3	3	1	1	10176	4	139		866	869	868		dcf007684d8598380507220e605e8e2c_3977	7ef7127a3f11d26e5ed74c78ba404004_3864	Pseudomonase_1_08506
clbC		colibactin polyketide synthase ClbC	3	3	1	1	10175	4	140		2600	2600	2600		dcf007684d8598380507220e605e8e2c_3979	7ef7127a3f11d26e5ed74c78ba404004_3862	Pseudomonase_1_08505
clbB		colibactin hybrid non-ribosomal peptide synthetase/type I polyketide synthase ClbB	3	3	1	1	10174	4	157		9620	9620	9620		dcf007684d8598380507220e605e8e2c_3981	7ef7127a3f11d26e5ed74c78ba404004_3860	Pseudomonase_1_08504
clbR		colibactin biosynthesis LuxR family transcriptional regulator ClbR	3	3	1	1	10173	4	156		212	212	212		dcf007684d8598380507220e605e8e2c_3983	7ef7127a3f11d26e5ed74c78ba404004_3858	Pseudomonase_1_08503
clbA		colibactin biosynthesis phosphopantetheinyl transferase ClbA	3	3	1	1	10172	4	155		734	734	734		dcf007684d8598380507220e605e8e2c_3985	7ef7127a3f11d26e5ed74c78ba404004_3856	Pseudomonase_1_08502
ldtA		L,D-transpeptidase	3	3	1	1	10167	4	152		935	935	935		dcf007684d8598380507220e605e8e2c_3991	7ef7127a3f11d26e5ed74c78ba404004_3850	Pseudomonase_1_08498
ymiA		YmiA family putative membrane protein	3	3	1	1	9894	309	35		128	140	136		dcf007684d8598380507220e605e8e2c_2583	7ef7127a3f11d26e5ed74c78ba404004_5260	Pseudomonase_1_04773
cobT		nicotinate-nucleotide--dimethylbenzimidazole phosphoribosyltransferase	3	3	1	1	10166	4	151		1079	1079	1079		dcf007684d8598380507220e605e8e2c_3993	7ef7127a3f11d26e5ed74c78ba404004_3848	Pseudomonase_1_08497
cobS		adenosylcobinamide-GDP ribazoletransferase	3	3	1	1	10165	4	150		743	743	743		dcf007684d8598380507220e605e8e2c_3995	7ef7127a3f11d26e5ed74c78ba404004_3846	Pseudomonase_1_08496
cobU		bifunctional adenosylcobinamide kinase/adenosylcobinamide-phosphate guanylyltransferase	3	3	1	1	10164	4	149		545	545	545		dcf007684d8598380507220e605e8e2c_3997	7ef7127a3f11d26e5ed74c78ba404004_3844	Pseudomonase_1_08495
WP_000966628.1		TonB-dependent receptor	3	3	1	1	10163	4	147		2147	2147	2147		dcf007684d8598380507220e605e8e2c_4001	7ef7127a3f11d26e5ed74c78ba404004_3840	Pseudomonase_1_08494
WP_000502870.1		ParB N-terminal domain-containing protein	3	3	1	1	10161	4	146		644	644	644		dcf007684d8598380507220e605e8e2c_4003	7ef7127a3f11d26e5ed74c78ba404004_3838	Pseudomonase_1_08492
WP_001362826.1		phosphoadenosine phosphosulfate reductase	3	3	1	1	10160	4	145		1223	1223	1223		dcf007684d8598380507220e605e8e2c_4005	7ef7127a3f11d26e5ed74c78ba404004_3836	Pseudomonase_1_08491
WP_024174324.1		PIG-L family deacetylase	3	3	1	1	4245	4	144		653	662	659		dcf007684d8598380507220e605e8e2c_4007	7ef7127a3f11d26e5ed74c78ba404004_3834	Pseudomonase_1_08490
WP_000667429.1		PfkB family carbohydrate kinase	3	3	1	1	4253	17	70		1214	1214	1214		dcf007684d8598380507220e605e8e2c_4015	7ef7127a3f11d26e5ed74c78ba404004_3824	Pseudomonase_1_08485
WP_001066372.1		glutamine amidotransferase	3	3	1	1	4254	17	69		758	758	758		dcf007684d8598380507220e605e8e2c_4017	7ef7127a3f11d26e5ed74c78ba404004_3822	Pseudomonase_1_08484
pyrF		orotidine-5'-phosphate decarboxylase	3	3	1	1	9902	309	43		737	797	757		dcf007684d8598380507220e605e8e2c_2599	7ef7127a3f11d26e5ed74c78ba404004_5244	Pseudomonase_1_04781
WP_000739817.1		DMT family transporter	3	3	1	1	4255	17	68		965	965	965		dcf007684d8598380507220e605e8e2c_4019	7ef7127a3f11d26e5ed74c78ba404004_3820	Pseudomonase_1_08483
WP_000656349.1		phosphotriesterase	3	3	1	1	4276	17	67		1034	1034	1034		dcf007684d8598380507220e605e8e2c_4021	7ef7127a3f11d26e5ed74c78ba404004_3818	Pseudomonase_1_08482
group_7322	tnpB	IS66 family insertion sequence element accessory protein TnpB	3	3	1	1	4278	17	65		347	347	347		dcf007684d8598380507220e605e8e2c_4029	7ef7127a3f11d26e5ed74c78ba404004_7559	Pseudomonase_1_09166
WP_000239761.1		transposase	3	3	1	1	4279	17	64		362	362	362		dcf007684d8598380507220e605e8e2c_4031	7ef7127a3f11d26e5ed74c78ba404004_7557	Pseudomonase_1_09165
WP_001178453.1		HTH-type transcriptional regulator ArgP	3	3	1	1	4280	17	63		887	887	887		dcf007684d8598380507220e605e8e2c_4033	7ef7127a3f11d26e5ed74c78ba404004_7555	Pseudomonase_1_09164
group_7325	lysS	lysine--tRNA ligase	3	3	1	1	4281	17	62		1496	1496	1496		dcf007684d8598380507220e605e8e2c_4035	7ef7127a3f11d26e5ed74c78ba404004_7553	Pseudomonase_1_09163
WP_000215693.1		helix-turn-helix domain-containing protein	3	3	1	1	4282	17	61		710	710	710		dcf007684d8598380507220e605e8e2c_4037	7ef7127a3f11d26e5ed74c78ba404004_7551	Pseudomonase_1_09162
WP_001092280.1		lysine decarboxylase LdcC	3	3	1	1	4283	17	60		2126	2126	2126		dcf007684d8598380507220e605e8e2c_4039	7ef7127a3f11d26e5ed74c78ba404004_7549	Pseudomonase_1_09161
group_7328	cadB	cadaverine/lysine antiporter	3	3	1	1	4284	17	59		1310	1310	1310		dcf007684d8598380507220e605e8e2c_4041	7ef7127a3f11d26e5ed74c78ba404004_7547	Pseudomonase_1_09160
WP_000156569.1		helix-turn-helix transcriptional regulator	3	3	1	1	9956	307	296		386	815	672		dcf007684d8598380507220e605e8e2c_2713	7ef7127a3f11d26e5ed74c78ba404004_5130	Pseudomonase_1_04836
WP_000282123.1		hypothetical protein	3	3	1	1	4488	17	56		182	182	182		dcf007684d8598380507220e605e8e2c_4047	7ef7127a3f11d26e5ed74c78ba404004_7541	Pseudomonase_1_09158
[truncated: 9,157 more rows]

## Sheet: Column Info
Column	Column Name	Description
A	Gene	The gene name, which is the most frequently occurring gene name from the sequences in the cluster. If there is no gene name, then it is given a generic unique name group_XXX.
B	Non-unique Gene name	A non unique gene name, where sequences with the same gene name have ended up in different groups. It might be because of split genes, or miss annotation.
C	Annotation	Functional annotation. The most frequently occurring functional annotation from the cluster is used.
D	No. isolates	Number of isolates represented in the cluster.
E	No. sequences	Number of sequences in the cluster.
F	Avg sequences per isolate	Average number of sequences per isolate. This is normally 1. If this is greater than 1 then there is over clustering and the paralogs couldnt be split.
G	Genome Fragment	Genome fragment, where there is evidence at the contig level that the genes are linked.
H	Order within Fragment	Order within fragment, combined with the genome fragment this gives an indication of the order of genes within the graph. In Excel, sort on Column G and H.
I	Accessory Fragment	Accessory Fragment is where core genes are excluded and there is evidence at contig level that the genes are linked.
J	Accessory Order with Fragment	Accessory order with fragment, combined with the Accessory fragment this gives an indication of the order of genes within the accessory graph. In Excel, sort on columns I and J.
K	QC	Comments on the quality of the cluster. Miss predictions are noted, as are single genes on single contigs, which can be evidence of low level contamination.
L	Min group size nuc	Minimum sequence length in nucleotides of the cluster.
M	Max group size nuc	Maximum sequence length in nucleotides of the cluster.
N	Avg group size nuc	Average sequence length in nucleotides of the cluster.
