# Supplementary material for: Comparative De Novo and Pan-Genome Analysis of MDR Nosocomial Bacteria Isolated from Hospitals in Jeddah, Saudi Arabia
Source: MDPI journal article supplement (doi:10.3390/microorganisms11102432), 2023-09-28
Supplement: s1 [file Table S2 gene_presence of E. coli_7_absence.xls]

## Sheet: Gene Presence Absence
Gene	Non-unique Gene name	Annotation	No. isolates	No. sequences	Avg sequences per isolate	Genome Fragment	Order within Fragment	Accessory Fragment	Accessory Order with Fragment	QC	Min group size nuc	Max group size nuc	Avg group size nuc	AP022409.1	CP042969.1	CP057487.1	CP062901	E_coli	LR782232
WP_053266728.1		rhomboid family intramembrane serine protease	6	6	1	4	5358				1877	1877	1877	81f6f292c45231c81cff920b572a826a_6347	d5a5a6aae91cabb186fe594057e8ea03_6667	ea50daa39c6c4a0574d509aa68b507b7_3287	4cb190364575d751463119e92857d019_6321	E_coli_7_01306	4840fb5d2d4897d217f65ba1ef1b22a7_6881
iraD		anti-adapter protein IraD	6	6	1	4	1371				392	392	392	81f6f292c45231c81cff920b572a826a_7884	d5a5a6aae91cabb186fe594057e8ea03_8199	ea50daa39c6c4a0574d509aa68b507b7_4787	4cb190364575d751463119e92857d019_7919	E_coli_7_00987	4840fb5d2d4897d217f65ba1ef1b22a7_8445
WP_000277135.1		fimbrial biogenesis outer membrane usher protein	6	7	1.17	4	5984				722	2513	2249	81f6f292c45231c81cff920b572a826a_7911 81f6f292c45231c81cff920b572a826a_1345	d5a5a6aae91cabb186fe594057e8ea03_1436	ea50daa39c6c4a0574d509aa68b507b7_7502	4cb190364575d751463119e92857d019_1359	E_coli_7_03925	4840fb5d2d4897d217f65ba1ef1b22a7_1906
yjcF		pentapeptide repeat-containing protein	6	6	1	4	1501				1292	1292	1292	81f6f292c45231c81cff920b572a826a_8468	d5a5a6aae91cabb186fe594057e8ea03_8840	ea50daa39c6c4a0574d509aa68b507b7_5245	4cb190364575d751463119e92857d019_8544	E_coli_7_02306	4840fb5d2d4897d217f65ba1ef1b22a7_8914
WP_000395831.1		arylsulfatase	6	6	1	4	1178				137	161	149	81f6f292c45231c81cff920b572a826a_9092	d5a5a6aae91cabb186fe594057e8ea03_9527	ea50daa39c6c4a0574d509aa68b507b7_5931	4cb190364575d751463119e92857d019_9166	E_coli_7_04252	4840fb5d2d4897d217f65ba1ef1b22a7_361
WP_000996695.1		type II toxin-antitoxin system PemK/MazF family toxin	6	6	1	4	1200				449	449	449	81f6f292c45231c81cff920b572a826a_9146	d5a5a6aae91cabb186fe594057e8ea03_9581	ea50daa39c6c4a0574d509aa68b507b7_5985	4cb190364575d751463119e92857d019_9220	E_coli_7_04227	4840fb5d2d4897d217f65ba1ef1b22a7_415
yifB		YifB family Mg chelatase-like AAA ATPase	6	7	1.17	4	1231				173	1520	1305	81f6f292c45231c81cff920b572a826a_9168	d5a5a6aae91cabb186fe594057e8ea03_9603	ea50daa39c6c4a0574d509aa68b507b7_6043 ea50daa39c6c4a0574d509aa68b507b7_6007	4cb190364575d751463119e92857d019_9242	E_coli_7_04218	4840fb5d2d4897d217f65ba1ef1b22a7_437
yidB		YidB family protein	6	6	1	4	5191				398	407	399	81f6f292c45231c81cff920b572a826a_11	d5a5a6aae91cabb186fe594057e8ea03_11	ea50daa39c6c4a0574d509aa68b507b7_6193	4cb190364575d751463119e92857d019_11	E_coli_7_02945	4840fb5d2d4897d217f65ba1ef1b22a7_585
dgoK		2-dehydro-3-deoxygalactonokinase	6	6	1	4	5196				878	878	878	81f6f292c45231c81cff920b572a826a_19	d5a5a6aae91cabb186fe594057e8ea03_19	ea50daa39c6c4a0574d509aa68b507b7_6201	4cb190364575d751463119e92857d019_19	E_coli_7_02941	4840fb5d2d4897d217f65ba1ef1b22a7_593
dgoT		MFS transporter	6	6	1	4	5199				1292	1337	1329	81f6f292c45231c81cff920b572a826a_25	d5a5a6aae91cabb186fe594057e8ea03_25	ea50daa39c6c4a0574d509aa68b507b7_6207	4cb190364575d751463119e92857d019_25	E_coli_7_02938	4840fb5d2d4897d217f65ba1ef1b22a7_599
yidQ		YceK/YidQ family lipoprotein	6	6	1	4	5202				260	332	320	81f6f292c45231c81cff920b572a826a_31	d5a5a6aae91cabb186fe594057e8ea03_31	ea50daa39c6c4a0574d509aa68b507b7_6213	4cb190364575d751463119e92857d019_31	E_coli_7_02935	4840fb5d2d4897d217f65ba1ef1b22a7_605
nlpA		lipoprotein NlpA	6	6	1	4	5232				818	818	818	81f6f292c45231c81cff920b572a826a_90	d5a5a6aae91cabb186fe594057e8ea03_90	ea50daa39c6c4a0574d509aa68b507b7_6270	4cb190364575d751463119e92857d019_90	E_coli_7_02907	4840fb5d2d4897d217f65ba1ef1b22a7_664
trmH		tRNA (guanosine(18)-2'-O)-methyltransferase TrmH	6	6	1	4	5240				656	689	683	81f6f292c45231c81cff920b572a826a_115	d5a5a6aae91cabb186fe594057e8ea03_111	ea50daa39c6c4a0574d509aa68b507b7_6293	4cb190364575d751463119e92857d019_113	E_coli_7_02896	4840fb5d2d4897d217f65ba1ef1b22a7_689
rfaC		lipopolysaccharide heptosyltransferase RfaC	6	6	1	4	5271				980	992	990	81f6f292c45231c81cff920b572a826a_171	d5a5a6aae91cabb186fe594057e8ea03_165	ea50daa39c6c4a0574d509aa68b507b7_6347	4cb190364575d751463119e92857d019_167	E_coli_7_02869	4840fb5d2d4897d217f65ba1ef1b22a7_743
yibN		rhodanese-like domain-containing protein	6	6	1	4	5281				431	431	431	81f6f292c45231c81cff920b572a826a_189	d5a5a6aae91cabb186fe594057e8ea03_185	ea50daa39c6c4a0574d509aa68b507b7_6367	4cb190364575d751463119e92857d019_187	E_coli_7_02859	4840fb5d2d4897d217f65ba1ef1b22a7_763
WP_001493459.1		hypothetical protein	6	6	1	4	4954				767	767	767	81f6f292c45231c81cff920b572a826a_576	d5a5a6aae91cabb186fe594057e8ea03_595	ea50daa39c6c4a0574d509aa68b507b7_6771	4cb190364575d751463119e92857d019_586	E_coli_7_01731	4840fb5d2d4897d217f65ba1ef1b22a7_1171
QMI19694.1		AraC family transcriptional regulator	6	6	1	4	5126				101	815	577	81f6f292c45231c81cff920b572a826a_249	d5a5a6aae91cabb186fe594057e8ea03_257	ea50daa39c6c4a0574d509aa68b507b7_6441	4cb190364575d751463119e92857d019_247	E_coli_7_02829	4840fb5d2d4897d217f65ba1ef1b22a7_833
WP_000858193.1		hypothetical protein	6	6	1	4	5105				341	341	341	81f6f292c45231c81cff920b572a826a_291	d5a5a6aae91cabb186fe594057e8ea03_299	ea50daa39c6c4a0574d509aa68b507b7_6483	4cb190364575d751463119e92857d019_289	E_coli_7_02808	4840fb5d2d4897d217f65ba1ef1b22a7_875
hokA		type I toxin-antitoxin system toxin HokA	6	6	1	4	5099				149	212	161	81f6f292c45231c81cff920b572a826a_306	d5a5a6aae91cabb186fe594057e8ea03_311	ea50daa39c6c4a0574d509aa68b507b7_6495	4cb190364575d751463119e92857d019_304	E_coli_7_01872	4840fb5d2d4897d217f65ba1ef1b22a7_887
yiaC		N-acetyltransferase	6	6	1	4	5091				440	440	440	81f6f292c45231c81cff920b572a826a_320	d5a5a6aae91cabb186fe594057e8ea03_327	ea50daa39c6c4a0574d509aa68b507b7_6509	4cb190364575d751463119e92857d019_318	E_coli_7_01865	4840fb5d2d4897d217f65ba1ef1b22a7_903
rcdB		LysR family transcriptional regulator	6	6	1	4	5060				899	971	923	81f6f292c45231c81cff920b572a826a_388	d5a5a6aae91cabb186fe594057e8ea03_395	ea50daa39c6c4a0574d509aa68b507b7_6577	4cb190364575d751463119e92857d019_386	E_coli_7_01828	4840fb5d2d4897d217f65ba1ef1b22a7_971
WP_001205329.1		hypothetical protein	6	6	1	4	5050				278	278	278	81f6f292c45231c81cff920b572a826a_406	d5a5a6aae91cabb186fe594057e8ea03_413	ea50daa39c6c4a0574d509aa68b507b7_6595	4cb190364575d751463119e92857d019_404	E_coli_7_01818	4840fb5d2d4897d217f65ba1ef1b22a7_989
hdeB		acid-activated periplasmic chaperone HdeB	6	6	1	4	5046				326	338	328	81f6f292c45231c81cff920b572a826a_414	d5a5a6aae91cabb186fe594057e8ea03_421	ea50daa39c6c4a0574d509aa68b507b7_6603	4cb190364575d751463119e92857d019_412	E_coli_7_01814	4840fb5d2d4897d217f65ba1ef1b22a7_997
yhiD		MgtC/SapB family protein	6	6	1	4	5045				575	647	635	81f6f292c45231c81cff920b572a826a_416	d5a5a6aae91cabb186fe594057e8ea03_423	ea50daa39c6c4a0574d509aa68b507b7_6605	4cb190364575d751463119e92857d019_414	E_coli_7_01813	4840fb5d2d4897d217f65ba1ef1b22a7_999
WP_000100287.1		permease	6	6	1	4	5042				1001	1013	1009	81f6f292c45231c81cff920b572a826a_424	d5a5a6aae91cabb186fe594057e8ea03_431	ea50daa39c6c4a0574d509aa68b507b7_6613	4cb190364575d751463119e92857d019_422	E_coli_7_01809	4840fb5d2d4897d217f65ba1ef1b22a7_1007
yehI		DUF4132 domain-containing protein	6	6	1	4	3756				3632	3632	3632	81f6f292c45231c81cff920b572a826a_3276	d5a5a6aae91cabb186fe594057e8ea03_3349	ea50daa39c6c4a0574d509aa68b507b7_9501	4cb190364575d751463119e92857d019_3249	E_coli_7_00270	4840fb5d2d4897d217f65ba1ef1b22a7_3835
arsC		glutaredoxin-dependent arsenate reductase	6	6	1	4	5040				425	425	425	81f6f292c45231c81cff920b572a826a_428	d5a5a6aae91cabb186fe594057e8ea03_435	ea50daa39c6c4a0574d509aa68b507b7_6617	4cb190364575d751463119e92857d019_426	E_coli_7_01807	4840fb5d2d4897d217f65ba1ef1b22a7_1011
WP_087651000.1		DUF4049 domain-containing protein	6	6	1	4	5024				1622	1622	1622	81f6f292c45231c81cff920b572a826a_460	d5a5a6aae91cabb186fe594057e8ea03_467	ea50daa39c6c4a0574d509aa68b507b7_6647	4cb190364575d751463119e92857d019_458	E_coli_7_01792	4840fb5d2d4897d217f65ba1ef1b22a7_1043
yhhS		MFS transporter	6	6	1	4	5007				1217	1250	1222	81f6f292c45231c81cff920b572a826a_490	d5a5a6aae91cabb186fe594057e8ea03_497	ea50daa39c6c4a0574d509aa68b507b7_6675	4cb190364575d751463119e92857d019_488	E_coli_7_01779	4840fb5d2d4897d217f65ba1ef1b22a7_1073
ugpQ		glycerophosphodiester phosphodiesterase	6	6	1	4	4979				743	743	743	81f6f292c45231c81cff920b572a826a_538	d5a5a6aae91cabb186fe594057e8ea03_545	ea50daa39c6c4a0574d509aa68b507b7_6723	4cb190364575d751463119e92857d019_540	E_coli_7_01749	4840fb5d2d4897d217f65ba1ef1b22a7_1121
yhhX		oxidoreductase	6	6	1	4	4971				1037	1037	1037	81f6f292c45231c81cff920b572a826a_546	d5a5a6aae91cabb186fe594057e8ea03_561	ea50daa39c6c4a0574d509aa68b507b7_6739	4cb190364575d751463119e92857d019_556	E_coli_7_01745	4840fb5d2d4897d217f65ba1ef1b22a7_1137
WP_000424560.1		hypothetical protein	6	6	1	4	4956				710	710	710	81f6f292c45231c81cff920b572a826a_574	d5a5a6aae91cabb186fe594057e8ea03_593	ea50daa39c6c4a0574d509aa68b507b7_6769	4cb190364575d751463119e92857d019_584	E_coli_7_01732	4840fb5d2d4897d217f65ba1ef1b22a7_1169
feoC		[Fe-S]-dependent transcriptional repressor FeoC	6	6	1	4	4938				236	236	236	81f6f292c45231c81cff920b572a826a_610	d5a5a6aae91cabb186fe594057e8ea03_629	ea50daa39c6c4a0574d509aa68b507b7_6805	4cb190364575d751463119e92857d019_620	E_coli_7_01713	4840fb5d2d4897d217f65ba1ef1b22a7_1205
hslR		ribosome-associated heat shock protein Hsp15	6	6	1	4	4925				401	401	401	81f6f292c45231c81cff920b572a826a_634	d5a5a6aae91cabb186fe594057e8ea03_649	ea50daa39c6c4a0574d509aa68b507b7_6825	4cb190364575d751463119e92857d019_644	E_coli_7_01701	4840fb5d2d4897d217f65ba1ef1b22a7_1225
hofN		DNA utilization protein HofN	6	6	1	4	4919				539	539	539	81f6f292c45231c81cff920b572a826a_646	d5a5a6aae91cabb186fe594057e8ea03_661	ea50daa39c6c4a0574d509aa68b507b7_6837	4cb190364575d751463119e92857d019_656	E_coli_7_01695	4840fb5d2d4897d217f65ba1ef1b22a7_1237
hofQ		DNA uptake porin HofQ	6	6	1	4	4916				1208	1238	1233	81f6f292c45231c81cff920b572a826a_652	d5a5a6aae91cabb186fe594057e8ea03_667	ea50daa39c6c4a0574d509aa68b507b7_6843	4cb190364575d751463119e92857d019_662	E_coli_7_01692	4840fb5d2d4897d217f65ba1ef1b22a7_1243
gph		phosphoglycolate phosphatase	6	6	1	4	4910				758	758	758	81f6f292c45231c81cff920b572a826a_664	d5a5a6aae91cabb186fe594057e8ea03_679	ea50daa39c6c4a0574d509aa68b507b7_6855	4cb190364575d751463119e92857d019_674	E_coli_7_01686	4840fb5d2d4897d217f65ba1ef1b22a7_1255
yhfX		YhfX family PLP-dependent enzyme	6	6	1	4	4906				1163	1163	1163	81f6f292c45231c81cff920b572a826a_672	d5a5a6aae91cabb186fe594057e8ea03_687	ea50daa39c6c4a0574d509aa68b507b7_6863	4cb190364575d751463119e92857d019_682	E_coli_7_01682	4840fb5d2d4897d217f65ba1ef1b22a7_1263
yhfW		phosphopentomutase	6	6	1	4	4905				1226	1226	1226	81f6f292c45231c81cff920b572a826a_674	d5a5a6aae91cabb186fe594057e8ea03_689	ea50daa39c6c4a0574d509aa68b507b7_6865	4cb190364575d751463119e92857d019_684	E_coli_7_01681	4840fb5d2d4897d217f65ba1ef1b22a7_1265
yhfU		DUF2620 domain-containing protein	6	6	1	4	4903				302	353	344	81f6f292c45231c81cff920b572a826a_678	d5a5a6aae91cabb186fe594057e8ea03_693	ea50daa39c6c4a0574d509aa68b507b7_6869	4cb190364575d751463119e92857d019_688	E_coli_7_01679	4840fb5d2d4897d217f65ba1ef1b22a7_1269
tusC		sulfurtransferase complex subunit TusC	6	6	1	4	4874				359	359	359	81f6f292c45231c81cff920b572a826a_736	d5a5a6aae91cabb186fe594057e8ea03_761	ea50daa39c6c4a0574d509aa68b507b7_6927	4cb190364575d751463119e92857d019_746	E_coli_7_01645	4840fb5d2d4897d217f65ba1ef1b22a7_1327
yhdN		DUF1992 domain-containing protein	6	6	1	4	143				368	368	368	81f6f292c45231c81cff920b572a826a_838	d5a5a6aae91cabb186fe594057e8ea03_835	ea50daa39c6c4a0574d509aa68b507b7_7001	4cb190364575d751463119e92857d019_848	E_coli_7_01594	4840fb5d2d4897d217f65ba1ef1b22a7_1401
yhdJ		adenine-specific DNA-methyltransferase	6	6	1	4	168				884	884	884	81f6f292c45231c81cff920b572a826a_907	d5a5a6aae91cabb186fe594057e8ea03_904	ea50daa39c6c4a0574d509aa68b507b7_7070	4cb190364575d751463119e92857d019_917	E_coli_7_03675	4840fb5d2d4897d217f65ba1ef1b22a7_1470
dusB		tRNA dihydrouridine synthase DusB	6	6	1	4	170				872	965	949	81f6f292c45231c81cff920b572a826a_911	d5a5a6aae91cabb186fe594057e8ea03_908	ea50daa39c6c4a0574d509aa68b507b7_7074	4cb190364575d751463119e92857d019_921	E_coli_7_03673	4840fb5d2d4897d217f65ba1ef1b22a7_1474
yhdT		YhdT family protein	6	6	1	4	173				242	242	242	81f6f292c45231c81cff920b572a826a_917	d5a5a6aae91cabb186fe594057e8ea03_914	ea50daa39c6c4a0574d509aa68b507b7_7080	4cb190364575d751463119e92857d019_927	E_coli_7_03670	4840fb5d2d4897d217f65ba1ef1b22a7_1480
wcaM		colanic acid biosynthesis protein WcaM	6	6	1	4	3684				1394	1394	1394	81f6f292c45231c81cff920b572a826a_3503	d5a5a6aae91cabb186fe594057e8ea03_3498	ea50daa39c6c4a0574d509aa68b507b7_155	4cb190364575d751463119e92857d019_3476	E_coli_7_00338	4840fb5d2d4897d217f65ba1ef1b22a7_4064
gltB		glutamate synthase large subunit	6	6	1	4	212				4460	4553	4475	81f6f292c45231c81cff920b572a826a_995	d5a5a6aae91cabb186fe594057e8ea03_988	ea50daa39c6c4a0574d509aa68b507b7_7154	4cb190364575d751463119e92857d019_1005	E_coli_7_03633	4840fb5d2d4897d217f65ba1ef1b22a7_1554
ibaG		BolA family iron metabolism protein IbaG	6	6	1	4	234				254	269	256	81f6f292c45231c81cff920b572a826a_1039	d5a5a6aae91cabb186fe594057e8ea03_1032	ea50daa39c6c4a0574d509aa68b507b7_7198	4cb190364575d751463119e92857d019_1049	E_coli_7_03611	4840fb5d2d4897d217f65ba1ef1b22a7_1598
yhbQ		DNA damage response exodeoxyribonuclease YhbQ	6	6	1	4	268				302	302	302	81f6f292c45231c81cff920b572a826a_1113	d5a5a6aae91cabb186fe594057e8ea03_1106	ea50daa39c6c4a0574d509aa68b507b7_7272	4cb190364575d751463119e92857d019_1123	E_coli_7_03576	4840fb5d2d4897d217f65ba1ef1b22a7_1672
yhbP		YhbP family protein	6	6	1	4	269				443	443	443	81f6f292c45231c81cff920b572a826a_1115	d5a5a6aae91cabb186fe594057e8ea03_1108	ea50daa39c6c4a0574d509aa68b507b7_7274	4cb190364575d751463119e92857d019_1125	E_coli_7_03575	4840fb5d2d4897d217f65ba1ef1b22a7_1674
yraN		YraN family protein	6	6	1	4	275				395	395	395	81f6f292c45231c81cff920b572a826a_1127	d5a5a6aae91cabb186fe594057e8ea03_1120	ea50daa39c6c4a0574d509aa68b507b7_7286	4cb190364575d751463119e92857d019_1137	E_coli_7_03569	4840fb5d2d4897d217f65ba1ef1b22a7_1686
yraK		fimbrial protein	6	6	1	4	278				1091	1091	1091	81f6f292c45231c81cff920b572a826a_1133	d5a5a6aae91cabb186fe594057e8ea03_1126	ea50daa39c6c4a0574d509aa68b507b7_7292	4cb190364575d751463119e92857d019_1143	E_coli_7_03566	4840fb5d2d4897d217f65ba1ef1b22a7_1692
agaI		galactosamine-6-phosphate isomerase	6	6	1	4	282				701	755	746	81f6f292c45231c81cff920b572a826a_1141	d5a5a6aae91cabb186fe594057e8ea03_1134	ea50daa39c6c4a0574d509aa68b507b7_7300	4cb190364575d751463119e92857d019_1151	E_coli_7_03562	4840fb5d2d4897d217f65ba1ef1b22a7_1700
WP_000675745.1		hypothetical protein	6	6	1	4	5903				539	539	539	81f6f292c45231c81cff920b572a826a_1186	d5a5a6aae91cabb186fe594057e8ea03_1181	ea50daa39c6c4a0574d509aa68b507b7_7345	4cb190364575d751463119e92857d019_1198	E_coli_7_03851	4840fb5d2d4897d217f65ba1ef1b22a7_1747
yccX		acylphosphatase	6	6	1	4	3508				278	278	278	81f6f292c45231c81cff920b572a826a_5674	d5a5a6aae91cabb186fe594057e8ea03_6022	ea50daa39c6c4a0574d509aa68b507b7_2644	4cb190364575d751463119e92857d019_5648	E_coli_7_03076	4840fb5d2d4897d217f65ba1ef1b22a7_6239
yqjF		DoxX family protein	6	6	1	4	5920				392	482	407	81f6f292c45231c81cff920b572a826a_1220	d5a5a6aae91cabb186fe594057e8ea03_1215	ea50daa39c6c4a0574d509aa68b507b7_7379	4cb190364575d751463119e92857d019_1232	E_coli_7_03867	4840fb5d2d4897d217f65ba1ef1b22a7_1781
WP_000755097.1		CS1 type fimbrial major subunit	6	6	1	4	5930				455	500	492	81f6f292c45231c81cff920b572a826a_1240	d5a5a6aae91cabb186fe594057e8ea03_1237	ea50daa39c6c4a0574d509aa68b507b7_7397	4cb190364575d751463119e92857d019_1252	E_coli_7_03876	4840fb5d2d4897d217f65ba1ef1b22a7_1801
ygjG		putrescine aminotransferase	6	6	1	4	5953				1379	1490	1397	81f6f292c45231c81cff920b572a826a_1286	d5a5a6aae91cabb186fe594057e8ea03_1283	ea50daa39c6c4a0574d509aa68b507b7_7443	4cb190364575d751463119e92857d019_1298	E_coli_7_03898	4840fb5d2d4897d217f65ba1ef1b22a7_1847
yqiK		flotillin family protein	6	6	1	4	5979				1661	1661	1661	81f6f292c45231c81cff920b572a826a_1335	d5a5a6aae91cabb186fe594057e8ea03_1426	ea50daa39c6c4a0574d509aa68b507b7_7492	4cb190364575d751463119e92857d019_1349	E_coli_7_03920	4840fb5d2d4897d217f65ba1ef1b22a7_1896
mdaB		NADPH:quinone oxidoreductase MdaB	6	6	1	4	6000				581	582	581	81f6f292c45231c81cff920b572a826a_1378	d5a5a6aae91cabb186fe594057e8ea03_1469	ea50daa39c6c4a0574d509aa68b507b7_7535	4cb190364575d751463119e92857d019_1392	E_coli_7_03941	4840fb5d2d4897d217f65ba1ef1b22a7_1939
yqhC		DNA-binding transcriptional regulator YqhC	6	6	1	4	6015				899	956	918	81f6f292c45231c81cff920b572a826a_1406	d5a5a6aae91cabb186fe594057e8ea03_1497	ea50daa39c6c4a0574d509aa68b507b7_7563	4cb190364575d751463119e92857d019_1426	E_coli_7_03955	4840fb5d2d4897d217f65ba1ef1b22a7_1967
yghA		NADP(+)-dependent aldehyde reductase	6	6	1	4	6020				815	884	872	81f6f292c45231c81cff920b572a826a_1416	d5a5a6aae91cabb186fe594057e8ea03_1507	ea50daa39c6c4a0574d509aa68b507b7_7573	4cb190364575d751463119e92857d019_1436	E_coli_7_03960	4840fb5d2d4897d217f65ba1ef1b22a7_1977
hybD		HyaD/HybD family hydrogenase maturation endopeptidase	6	6	1	4	6029				494	494	494	81f6f292c45231c81cff920b572a826a_1434	d5a5a6aae91cabb186fe594057e8ea03_1527	ea50daa39c6c4a0574d509aa68b507b7_7591	4cb190364575d751463119e92857d019_1454	E_coli_7_03969	4840fb5d2d4897d217f65ba1ef1b22a7_1995
WP_001299422.1		YtfJ family protein	6	6	1	4	349				560	560	560	81f6f292c45231c81cff920b572a826a_1458	d5a5a6aae91cabb186fe594057e8ea03_1555	ea50daa39c6c4a0574d509aa68b507b7_7615	4cb190364575d751463119e92857d019_1478	E_coli_7_02576	4840fb5d2d4897d217f65ba1ef1b22a7_2021
bioF		8-amino-7-oxononanoate synthase	6	6	1	4	93				1154	1154	1154	81f6f292c45231c81cff920b572a826a_6072	d5a5a6aae91cabb186fe594057e8ea03_6418	ea50daa39c6c4a0574d509aa68b507b7_3038	4cb190364575d751463119e92857d019_6046	E_coli_7_03278	4840fb5d2d4897d217f65ba1ef1b22a7_6637
lptG		LPS export ABC transporter permease LptG	6	6	1	4	351				1079	1079	1079	81f6f292c45231c81cff920b572a826a_1462	d5a5a6aae91cabb186fe594057e8ea03_1559	ea50daa39c6c4a0574d509aa68b507b7_7619	4cb190364575d751463119e92857d019_1482	E_coli_7_02574	4840fb5d2d4897d217f65ba1ef1b22a7_2025
oleD_1		NAD-dependent epimerase/dehydratase family protein	6	6	1	4	354				914	914	914	81f6f292c45231c81cff920b572a826a_1468	d5a5a6aae91cabb186fe594057e8ea03_1565	ea50daa39c6c4a0574d509aa68b507b7_7625	4cb190364575d751463119e92857d019_1488	E_coli_7_02571	4840fb5d2d4897d217f65ba1ef1b22a7_2031
WP_001345956.1		fatty acyl-AMP ligase	6	6	1	4	355				1688	1730	1711	81f6f292c45231c81cff920b572a826a_1470	d5a5a6aae91cabb186fe594057e8ea03_1567	ea50daa39c6c4a0574d509aa68b507b7_7627	4cb190364575d751463119e92857d019_1490	E_coli_7_02570	4840fb5d2d4897d217f65ba1ef1b22a7_2033
pppA		prepilin peptidase PppA	6	6	1	4	366				809	809	809	81f6f292c45231c81cff920b572a826a_1490	d5a5a6aae91cabb186fe594057e8ea03_1587	ea50daa39c6c4a0574d509aa68b507b7_7647	4cb190364575d751463119e92857d019_1510	E_coli_7_02560	4840fb5d2d4897d217f65ba1ef1b22a7_2053
gspC		type II secretion system protein GspC	6	6	1	4	368				818	959	935	81f6f292c45231c81cff920b572a826a_1494	d5a5a6aae91cabb186fe594057e8ea03_1591	ea50daa39c6c4a0574d509aa68b507b7_7651	4cb190364575d751463119e92857d019_1514	E_coli_7_02558	4840fb5d2d4897d217f65ba1ef1b22a7_2057
gspI		type II secretion system minor pseudopilin GspI	6	6	1	4	374				371	371	371	81f6f292c45231c81cff920b572a826a_1506	d5a5a6aae91cabb186fe594057e8ea03_1603	ea50daa39c6c4a0574d509aa68b507b7_7663	4cb190364575d751463119e92857d019_1526	E_coli_7_02552	4840fb5d2d4897d217f65ba1ef1b22a7_2069
yqgE		YqgE/AlgH family protein	6	6	1	4	529				563	635	575	81f6f292c45231c81cff920b572a826a_1563	d5a5a6aae91cabb186fe594057e8ea03_1656	ea50daa39c6c4a0574d509aa68b507b7_7818	4cb190364575d751463119e92857d019_1577	E_coli_7_02525	4840fb5d2d4897d217f65ba1ef1b22a7_2120
yggI		SprT family zinc-dependent metalloprotease	6	6	1	4	525				455	497	490	81f6f292c45231c81cff920b572a826a_1571	d5a5a6aae91cabb186fe594057e8ea03_1664	ea50daa39c6c4a0574d509aa68b507b7_7826	4cb190364575d751463119e92857d019_1585	E_coli_7_02521	4840fb5d2d4897d217f65ba1ef1b22a7_2128
WP_000956872.1		sulfate/molybdate ABC transporter ATP-binding protein	6	6	1	4	6116				497	677	647	81f6f292c45231c81cff920b572a826a_1605	d5a5a6aae91cabb186fe594057e8ea03_1696	ea50daa39c6c4a0574d509aa68b507b7_7858	4cb190364575d751463119e92857d019_1617	E_coli_7_02505	4840fb5d2d4897d217f65ba1ef1b22a7_2158
yahE		DUF2877 domain-containing protein	6	6	1	4	5875				863	863	863	81f6f292c45231c81cff920b572a826a_6946	d5a5a6aae91cabb186fe594057e8ea03_7317	ea50daa39c6c4a0574d509aa68b507b7_3888	4cb190364575d751463119e92857d019_6922	E_coli_7_04106	4840fb5d2d4897d217f65ba1ef1b22a7_7504
ygfF		SDR family oxidoreductase	6	6	1	4	6148				743	743	743	81f6f292c45231c81cff920b572a826a_1672	d5a5a6aae91cabb186fe594057e8ea03_1763	ea50daa39c6c4a0574d509aa68b507b7_7927	4cb190364575d751463119e92857d019_1684	E_coli_7_02476	4840fb5d2d4897d217f65ba1ef1b22a7_2225
prfB		peptide chain release factor 2	6	6	1	4	6160				881	1022	998	81f6f292c45231c81cff920b572a826a_1695	d5a5a6aae91cabb186fe594057e8ea03_1786	ea50daa39c6c4a0574d509aa68b507b7_7950	4cb190364575d751463119e92857d019_1707	E_coli_7_02465	4840fb5d2d4897d217f65ba1ef1b22a7_2248
idi		isopentenyl-diphosphate Delta-isomerase	6	6	1	4	6162				548	548	548	81f6f292c45231c81cff920b572a826a_1699	d5a5a6aae91cabb186fe594057e8ea03_1790	ea50daa39c6c4a0574d509aa68b507b7_7954	4cb190364575d751463119e92857d019_1711	E_coli_7_02463	4840fb5d2d4897d217f65ba1ef1b22a7_2252
WP_001010156.1		hypothetical protein	6	6	1	4	6164				125	125	125	81f6f292c45231c81cff920b572a826a_1703	d5a5a6aae91cabb186fe594057e8ea03_1794	ea50daa39c6c4a0574d509aa68b507b7_7958	4cb190364575d751463119e92857d019_1715	E_coli_7_02462	4840fb5d2d4897d217f65ba1ef1b22a7_2256
WP_000676929.1		hypothetical protein	6	6	1	4	6188				1532	1610	1597	81f6f292c45231c81cff920b572a826a_1754	d5a5a6aae91cabb186fe594057e8ea03_1845	ea50daa39c6c4a0574d509aa68b507b7_8009	4cb190364575d751463119e92857d019_1766	E_coli_7_02437	4840fb5d2d4897d217f65ba1ef1b22a7_2307
WP_000060558.1		invasion protein	6	6	1	4	6196				293	293	293	81f6f292c45231c81cff920b572a826a_1768	d5a5a6aae91cabb186fe594057e8ea03_1861	ea50daa39c6c4a0574d509aa68b507b7_8025	4cb190364575d751463119e92857d019_1780	E_coli_7_02429	4840fb5d2d4897d217f65ba1ef1b22a7_2321
WP_032283509.1		hypothetical protein	6	6	1	4	6199				209	431	394	81f6f292c45231c81cff920b572a826a_1782	d5a5a6aae91cabb186fe594057e8ea03_1877	ea50daa39c6c4a0574d509aa68b507b7_8039	4cb190364575d751463119e92857d019_1794	E_coli_7_02422	4840fb5d2d4897d217f65ba1ef1b22a7_2335
WP_001352551.1		lytic transglycosylase domain-containing protein	6	6	1	4	6201				374	476	442	81f6f292c45231c81cff920b572a826a_1786	d5a5a6aae91cabb186fe594057e8ea03_1881	ea50daa39c6c4a0574d509aa68b507b7_8043	4cb190364575d751463119e92857d019_1798	E_coli_7_02419	4840fb5d2d4897d217f65ba1ef1b22a7_2339
WP_000655821.1		hypothetical protein	6	6	1	4	6207				80	140	90	81f6f292c45231c81cff920b572a826a_1798	d5a5a6aae91cabb186fe594057e8ea03_1895	ea50daa39c6c4a0574d509aa68b507b7_8055	4cb190364575d751463119e92857d019_1810	E_coli_7_02412	4840fb5d2d4897d217f65ba1ef1b22a7_2351
WP_032296867.1		glycosyltransferase	6	6	1	4	5777				2444	2444	2444	81f6f292c45231c81cff920b572a826a_7149	d5a5a6aae91cabb186fe594057e8ea03_7470	ea50daa39c6c4a0574d509aa68b507b7_4041	4cb190364575d751463119e92857d019_7081	E_coli_7_04180	4840fb5d2d4897d217f65ba1ef1b22a7_7717
ppdB		prepilin peptidase-dependent protein	6	6	1	4	6232				563	563	563	81f6f292c45231c81cff920b572a826a_1846	d5a5a6aae91cabb186fe594057e8ea03_1943	ea50daa39c6c4a0574d509aa68b507b7_8103	4cb190364575d751463119e92857d019_1858	E_coli_7_02386	4840fb5d2d4897d217f65ba1ef1b22a7_2399
ygdB		DUF2509 family protein	6	6	1	4	6233				407	407	407	81f6f292c45231c81cff920b572a826a_1848	d5a5a6aae91cabb186fe594057e8ea03_1945	ea50daa39c6c4a0574d509aa68b507b7_8105	4cb190364575d751463119e92857d019_1860	E_coli_7_02385	4840fb5d2d4897d217f65ba1ef1b22a7_2401
xni		flap endonuclease Xni	6	6	1	4	6283				755	845	770	81f6f292c45231c81cff920b572a826a_1965	d5a5a6aae91cabb186fe594057e8ea03_2058	ea50daa39c6c4a0574d509aa68b507b7_8170	4cb190364575d751463119e92857d019_1970	E_coli_7_02763	4840fb5d2d4897d217f65ba1ef1b22a7_2504
nanS		sialate O-acetylesterase	6	6	1	4	2506				272	980	862	81f6f292c45231c81cff920b572a826a_7950	d5a5a6aae91cabb186fe594057e8ea03_8235	ea50daa39c6c4a0574d509aa68b507b7_4823	4cb190364575d751463119e92857d019_7955	E_coli_7_00969	4840fb5d2d4897d217f65ba1ef1b22a7_8481
yqcC		YqcC family protein	6	6	1	4	6289				329	329	329	81f6f292c45231c81cff920b572a826a_1977	d5a5a6aae91cabb186fe594057e8ea03_2070	ea50daa39c6c4a0574d509aa68b507b7_8182	4cb190364575d751463119e92857d019_1982	E_coli_7_02757	4840fb5d2d4897d217f65ba1ef1b22a7_2516
ygcR		electron transfer flavoprotein subunit beta/FixA family protein	6	6	1	4	6310				779	779	779	81f6f292c45231c81cff920b572a826a_2022	d5a5a6aae91cabb186fe594057e8ea03_2115	ea50daa39c6c4a0574d509aa68b507b7_8227	4cb190364575d751463119e92857d019_2027	E_coli_7_02735	4840fb5d2d4897d217f65ba1ef1b22a7_2561
ygcQ		electron transfer flavoprotein subunit alpha/FixB family protein	6	6	1	4	6311				860	860	860	81f6f292c45231c81cff920b572a826a_2024	d5a5a6aae91cabb186fe594057e8ea03_2117	ea50daa39c6c4a0574d509aa68b507b7_8229	4cb190364575d751463119e92857d019_2029	E_coli_7_02734	4840fb5d2d4897d217f65ba1ef1b22a7_2563
ygcO		ferredoxin family protein	6	6	1	4	6313				260	260	260	81f6f292c45231c81cff920b572a826a_2028	d5a5a6aae91cabb186fe594057e8ea03_2121	ea50daa39c6c4a0574d509aa68b507b7_8233	4cb190364575d751463119e92857d019_2033	E_coli_7_02732	4840fb5d2d4897d217f65ba1ef1b22a7_2567
casA		type I-E CRISPR-associated protein Cse1/CasA	6	6	1	4	6330				1562	1562	1562	81f6f292c45231c81cff920b572a826a_2044	d5a5a6aae91cabb186fe594057e8ea03_2137	ea50daa39c6c4a0574d509aa68b507b7_8249	4cb190364575d751463119e92857d019_2049	E_coli_7_02724	4840fb5d2d4897d217f65ba1ef1b22a7_2583
cas5e		type I-E CRISPR-associated protein Cas5/CasD	6	6	1	4	6325				746	746	746	81f6f292c45231c81cff920b572a826a_2050	d5a5a6aae91cabb186fe594057e8ea03_2143	ea50daa39c6c4a0574d509aa68b507b7_8255	4cb190364575d751463119e92857d019_2055	E_coli_7_02721	4840fb5d2d4897d217f65ba1ef1b22a7_2589
iap		alkaline phosphatase isozyme conversion aminopeptidase	6	6	1	4	6321				1037	1037	1037	81f6f292c45231c81cff920b572a826a_2059	d5a5a6aae91cabb186fe594057e8ea03_2152	ea50daa39c6c4a0574d509aa68b507b7_8264	4cb190364575d751463119e92857d019_2064	E_coli_7_02717	4840fb5d2d4897d217f65ba1ef1b22a7_2598
pphB		protein-serine/threonine phosphatase	6	6	1	4	1050				656	656	656	81f6f292c45231c81cff920b572a826a_2097	d5a5a6aae91cabb186fe594057e8ea03_2198	ea50daa39c6c4a0574d509aa68b507b7_8310	4cb190364575d751463119e92857d019_2102	E_coli_7_02698	4840fb5d2d4897d217f65ba1ef1b22a7_2636
WP_000611928.1		hypothetical protein	6	6	1	4	1052				134	179	171	81f6f292c45231c81cff920b572a826a_2101	d5a5a6aae91cabb186fe594057e8ea03_2202	ea50daa39c6c4a0574d509aa68b507b7_8314	4cb190364575d751463119e92857d019_2106	E_coli_7_02696	4840fb5d2d4897d217f65ba1ef1b22a7_2640
hypF		carbamoyltransferase HypF	6	6	1	4	1076				2252	2252	2252	81f6f292c45231c81cff920b572a826a_2147	d5a5a6aae91cabb186fe594057e8ea03_2248	ea50daa39c6c4a0574d509aa68b507b7_8356	4cb190364575d751463119e92857d019_2148	E_coli_7_02673	4840fb5d2d4897d217f65ba1ef1b22a7_2686
mltB		lytic murein transglycosylase B	6	6	1	4	1087				1085	1190	1102	81f6f292c45231c81cff920b572a826a_2169	d5a5a6aae91cabb186fe594057e8ea03_2270	ea50daa39c6c4a0574d509aa68b507b7_8378	4cb190364575d751463119e92857d019_2170	E_coli_7_02662	4840fb5d2d4897d217f65ba1ef1b22a7_2708
ratA		type II toxin-antitoxin system toxin RatA	6	6	1	4	4306				437	476	450	81f6f292c45231c81cff920b572a826a_2276	d5a5a6aae91cabb186fe594057e8ea03_2377	ea50daa39c6c4a0574d509aa68b507b7_8513	4cb190364575d751463119e92857d019_2280	E_coli_7_02610	4840fb5d2d4897d217f65ba1ef1b22a7_2837
yfjD		HlyC/CorC family transporter	6	6	1	4	4299				1241	1286	1278	81f6f292c45231c81cff920b572a826a_2290	d5a5a6aae91cabb186fe594057e8ea03_2389	ea50daa39c6c4a0574d509aa68b507b7_8525	4cb190364575d751463119e92857d019_2294	E_coli_7_02603	4840fb5d2d4897d217f65ba1ef1b22a7_2849
ypjD		inner membrane protein YpjD	6	6	1	4	4298				791	866	803	81f6f292c45231c81cff920b572a826a_2292	d5a5a6aae91cabb186fe594057e8ea03_2391	ea50daa39c6c4a0574d509aa68b507b7_8527	4cb190364575d751463119e92857d019_2296	E_coli_7_02602	4840fb5d2d4897d217f65ba1ef1b22a7_2851
yfiM		YfiM family lipoprotein	6	6	1	4	3826				272	323	314	81f6f292c45231c81cff920b572a826a_2345	d5a5a6aae91cabb186fe594057e8ea03_2444	ea50daa39c6c4a0574d509aa68b507b7_8580	4cb190364575d751463119e92857d019_2349	E_coli_7_03388	4840fb5d2d4897d217f65ba1ef1b22a7_2904
yfiE		LysR family transcriptional regulator	6	6	1	4	3836				881	881	881	81f6f292c45231c81cff920b572a826a_2365	d5a5a6aae91cabb186fe594057e8ea03_2464	ea50daa39c6c4a0574d509aa68b507b7_8598	4cb190364575d751463119e92857d019_2369	E_coli_7_03397	4840fb5d2d4897d217f65ba1ef1b22a7_2924
trmN		tRNA(1)(Val) (adenine(37)-N(6))-methyltransferase TrmN	6	6	1	4	3838				737	737	737	81f6f292c45231c81cff920b572a826a_2369	d5a5a6aae91cabb186fe594057e8ea03_2470	ea50daa39c6c4a0574d509aa68b507b7_8602	4cb190364575d751463119e92857d019_2373	E_coli_7_03399	4840fb5d2d4897d217f65ba1ef1b22a7_2928
WP_001309158.1		hypothetical protein	6	10	1.67	4	618				230	1559	877	81f6f292c45231c81cff920b572a826a_8096 81f6f292c45231c81cff920b572a826a_8098	d5a5a6aae91cabb186fe594057e8ea03_8293 d5a5a6aae91cabb186fe594057e8ea03_8295	ea50daa39c6c4a0574d509aa68b507b7_4869 ea50daa39c6c4a0574d509aa68b507b7_4871	4cb190364575d751463119e92857d019_8172	E_coli_7_04430 E_coli_7_04429	4840fb5d2d4897d217f65ba1ef1b22a7_8536
tadA		tRNA adenosine(34) deaminase TadA	6	6	1	4	3856				503	536	508	81f6f292c45231c81cff920b572a826a_2405	d5a5a6aae91cabb186fe594057e8ea03_2506	ea50daa39c6c4a0574d509aa68b507b7_8638	4cb190364575d751463119e92857d019_2409	E_coli_7_03415	4840fb5d2d4897d217f65ba1ef1b22a7_2964
qseE		two component system sensor histidine kinase QseE/GlrK	6	6	1	4	3859				1382	1427	1419	81f6f292c45231c81cff920b572a826a_2411	d5a5a6aae91cabb186fe594057e8ea03_2512	ea50daa39c6c4a0574d509aa68b507b7_8644	4cb190364575d751463119e92857d019_2415	E_coli_7_03418	4840fb5d2d4897d217f65ba1ef1b22a7_2970
yphC		zinc-binding dehydrogenase	6	6	1	4	3870				1061	1094	1088	81f6f292c45231c81cff920b572a826a_2433	d5a5a6aae91cabb186fe594057e8ea03_2534	ea50daa39c6c4a0574d509aa68b507b7_8666	4cb190364575d751463119e92857d019_2437	E_coli_7_03429	4840fb5d2d4897d217f65ba1ef1b22a7_2992
yfgJ		zinc ribbon domain-containing protein	6	6	1	4	3906				215	215	215	81f6f292c45231c81cff920b572a826a_2505	d5a5a6aae91cabb186fe594057e8ea03_2604	ea50daa39c6c4a0574d509aa68b507b7_8736	4cb190364575d751463119e92857d019_2509	E_coli_7_03464	4840fb5d2d4897d217f65ba1ef1b22a7_3064
yfgG		DUF2633 family protein	6	6	1	4	3926				173	191	188	81f6f292c45231c81cff920b572a826a_2517	d5a5a6aae91cabb186fe594057e8ea03_2616	ea50daa39c6c4a0574d509aa68b507b7_8748	4cb190364575d751463119e92857d019_2521	E_coli_7_03470	4840fb5d2d4897d217f65ba1ef1b22a7_3108
hda		DnaA inactivator Hda	6	6	1	4	3935				701	746	716	81f6f292c45231c81cff920b572a826a_2535	d5a5a6aae91cabb186fe594057e8ea03_2634	ea50daa39c6c4a0574d509aa68b507b7_8766	4cb190364575d751463119e92857d019_2539	E_coli_7_03479	4840fb5d2d4897d217f65ba1ef1b22a7_3126
hyfJ		hydrogenase 4 assembly chaperone HyfJ	6	6	1	4	3940				413	413	413	81f6f292c45231c81cff920b572a826a_2547	d5a5a6aae91cabb186fe594057e8ea03_2646	ea50daa39c6c4a0574d509aa68b507b7_8778	4cb190364575d751463119e92857d019_2551	E_coli_7_03485	4840fb5d2d4897d217f65ba1ef1b22a7_3138
hyfG		hydrogenase 4 catalytic subunit HyfG	6	6	1	4	3943				1667	1715	1691	81f6f292c45231c81cff920b572a826a_2553	d5a5a6aae91cabb186fe594057e8ea03_2652	ea50daa39c6c4a0574d509aa68b507b7_8784	4cb190364575d751463119e92857d019_2557	E_coli_7_03488	4840fb5d2d4897d217f65ba1ef1b22a7_3144
hyfA		hydrogenase 4 subunit HyfA	6	6	1	4	3949				617	617	617	81f6f292c45231c81cff920b572a826a_2565	d5a5a6aae91cabb186fe594057e8ea03_2664	ea50daa39c6c4a0574d509aa68b507b7_8796	4cb190364575d751463119e92857d019_2569	E_coli_7_03497	4840fb5d2d4897d217f65ba1ef1b22a7_3156
eutM		ethanolamine utilization microcompartment protein EutM	6	6	1	4	3978				293	335	300	81f6f292c45231c81cff920b572a826a_2621	d5a5a6aae91cabb186fe594057e8ea03_2720	ea50daa39c6c4a0574d509aa68b507b7_8852	4cb190364575d751463119e92857d019_2625	E_coli_7_03525	4840fb5d2d4897d217f65ba1ef1b22a7_3212
WP_072056505.1		RNA-guided endonuclease TnpB family protein	6	9	1.5	4	1636				1148	1208	1194	81f6f292c45231c81cff920b572a826a_8186	d5a5a6aae91cabb186fe594057e8ea03_4166	ea50daa39c6c4a0574d509aa68b507b7_864 ea50daa39c6c4a0574d509aa68b507b7_4963	4cb190364575d751463119e92857d019_8264	E_coli_7_01898 E_coli_7_02168	4840fb5d2d4897d217f65ba1ef1b22a7_4553 4840fb5d2d4897d217f65ba1ef1b22a7_4266
yfeZ		DUF2919 domain-containing protein	6	6	1	4	3998				449	449	449	81f6f292c45231c81cff920b572a826a_2651	d5a5a6aae91cabb186fe594057e8ea03_2750	ea50daa39c6c4a0574d509aa68b507b7_8916	4cb190364575d751463119e92857d019_2655	E_coli_7_03540	4840fb5d2d4897d217f65ba1ef1b22a7_3242
murR		HTH-type transcriptional regulator MurR	6	6	1	4	4004				857	857	857	81f6f292c45231c81cff920b572a826a_2663	d5a5a6aae91cabb186fe594057e8ea03_2762	ea50daa39c6c4a0574d509aa68b507b7_8928	4cb190364575d751463119e92857d019_2667	E_coli_7_04538	4840fb5d2d4897d217f65ba1ef1b22a7_3254
yfeD		putative DNA-binding transcriptional regulator	6	6	1	4	4029				371	392	385	81f6f292c45231c81cff920b572a826a_2728	d5a5a6aae91cabb186fe594057e8ea03_2827	ea50daa39c6c4a0574d509aa68b507b7_8985	4cb190364575d751463119e92857d019_2735	E_coli_7_00009	4840fb5d2d4897d217f65ba1ef1b22a7_3319
yfeC		putative DNA-binding transcriptional regulator	6	6	1	4	4030				344	359	356	81f6f292c45231c81cff920b572a826a_2730	d5a5a6aae91cabb186fe594057e8ea03_2829	ea50daa39c6c4a0574d509aa68b507b7_8987	4cb190364575d751463119e92857d019_2737	E_coli_7_00010	4840fb5d2d4897d217f65ba1ef1b22a7_3321
ypdF		aminopeptidase	6	6	1	4	4039				1085	1085	1085	81f6f292c45231c81cff920b572a826a_2754	d5a5a6aae91cabb186fe594057e8ea03_2853	ea50daa39c6c4a0574d509aa68b507b7_9011	4cb190364575d751463119e92857d019_2761	E_coli_7_00021	4840fb5d2d4897d217f65ba1ef1b22a7_3345
dsdX		D-serine transporter DsdX	6	6	1	4	4070				218	1337	591	81f6f292c45231c81cff920b572a826a_2796	d5a5a6aae91cabb186fe594057e8ea03_2895	ea50daa39c6c4a0574d509aa68b507b7_9053	4cb190364575d751463119e92857d019_2803	E_coli_7_00041	4840fb5d2d4897d217f65ba1ef1b22a7_3387
yfcZ		YfcZ/YiiS family protein	6	6	1	4	4082				284	284	284	81f6f292c45231c81cff920b572a826a_2835	d5a5a6aae91cabb186fe594057e8ea03_2916	ea50daa39c6c4a0574d509aa68b507b7_9074	4cb190364575d751463119e92857d019_2824	E_coli_7_00058	4840fb5d2d4897d217f65ba1ef1b22a7_3408
yfcU		fimbrial usher protein YfcU	6	6	1	4	4087				2642	2645	2644	81f6f292c45231c81cff920b572a826a_2845	d5a5a6aae91cabb186fe594057e8ea03_2926	ea50daa39c6c4a0574d509aa68b507b7_9084	4cb190364575d751463119e92857d019_2834	E_coli_7_00063	4840fb5d2d4897d217f65ba1ef1b22a7_3418
pdxB		4-phosphoerythronate dehydrogenase PdxB	6	6	1	4	4111				1136	1136	1136	81f6f292c45231c81cff920b572a826a_2879	d5a5a6aae91cabb186fe594057e8ea03_2960	ea50daa39c6c4a0574d509aa68b507b7_9118	4cb190364575d751463119e92857d019_2868	E_coli_7_00080	4840fb5d2d4897d217f65ba1ef1b22a7_3452
dusA		tRNA dihydrouridine(20/20a) synthase DusA	6	8	1.34	4	1482				122	1037	808	81f6f292c45231c81cff920b572a826a_8506	d5a5a6aae91cabb186fe594057e8ea03_8876 d5a5a6aae91cabb186fe594057e8ea03_8998	ea50daa39c6c4a0574d509aa68b507b7_5281 ea50daa39c6c4a0574d509aa68b507b7_5404	4cb190364575d751463119e92857d019_8582	E_coli_7_02324	4840fb5d2d4897d217f65ba1ef1b22a7_8952
yfcC		putative basic amino acid antiporter YfcC	6	6	1	4	4134				1478	1520	1513	81f6f292c45231c81cff920b572a826a_2923	d5a5a6aae91cabb186fe594057e8ea03_3004	ea50daa39c6c4a0574d509aa68b507b7_9162	4cb190364575d751463119e92857d019_2912	E_coli_7_00102	4840fb5d2d4897d217f65ba1ef1b22a7_3496
yfaA		DUF2138 domain-containing protein	6	6	1	4	4198				1688	1688	1688	81f6f292c45231c81cff920b572a826a_3049	d5a5a6aae91cabb186fe594057e8ea03_3132	ea50daa39c6c4a0574d509aa68b507b7_9286	4cb190364575d751463119e92857d019_3038	E_coli_7_00164	4840fb5d2d4897d217f65ba1ef1b22a7_3624
alkB		DNA oxidative demethylase AlkB	6	6	1	4	4210				650	650	650	81f6f292c45231c81cff920b572a826a_3083	d5a5a6aae91cabb186fe594057e8ea03_3154	ea50daa39c6c4a0574d509aa68b507b7_9308	4cb190364575d751463119e92857d019_3060	E_coli_7_00175	4840fb5d2d4897d217f65ba1ef1b22a7_3646
psuG		pseudouridine-5'-phosphate glycosidase	6	6	1	4	4255				470	938	860	81f6f292c45231c81cff920b572a826a_3180	d5a5a6aae91cabb186fe594057e8ea03_3249	ea50daa39c6c4a0574d509aa68b507b7_9403	4cb190364575d751463119e92857d019_3153	E_coli_7_00222	4840fb5d2d4897d217f65ba1ef1b22a7_3739
yehY		glycine betaine ABC transporter permease YehY	6	6	1	4	3770				689	1157	1079	81f6f292c45231c81cff920b572a826a_3248	d5a5a6aae91cabb186fe594057e8ea03_3321	ea50daa39c6c4a0574d509aa68b507b7_9473	4cb190364575d751463119e92857d019_3221	E_coli_7_00256	4840fb5d2d4897d217f65ba1ef1b22a7_3807
yohO		protein YohO	6	6	1	4	3767				107	107	107	81f6f292c45231c81cff920b572a826a_3254	d5a5a6aae91cabb186fe594057e8ea03_3327	ea50daa39c6c4a0574d509aa68b507b7_9479	4cb190364575d751463119e92857d019_3227	E_coli_7_00259	4840fb5d2d4897d217f65ba1ef1b22a7_3813
yehM		DUF5682 family protein	6	6	1	4	3759				2279	2279	2279	81f6f292c45231c81cff920b572a826a_3270	d5a5a6aae91cabb186fe594057e8ea03_3343	ea50daa39c6c4a0574d509aa68b507b7_9495	4cb190364575d751463119e92857d019_3243	E_coli_7_00267	4840fb5d2d4897d217f65ba1ef1b22a7_3829
yehE		YehE family protein	6	6	1	4	3752				281	281	281	81f6f292c45231c81cff920b572a826a_3286	d5a5a6aae91cabb186fe594057e8ea03_3357	ea50daa39c6c4a0574d509aa68b507b7_9509	4cb190364575d751463119e92857d019_3257	E_coli_7_00275	4840fb5d2d4897d217f65ba1ef1b22a7_3843
thiM		hydroxyethylthiazole kinase	6	6	1	4	3744				788	788	788	81f6f292c45231c81cff920b572a826a_3303	d5a5a6aae91cabb186fe594057e8ea03_3374	ea50daa39c6c4a0574d509aa68b507b7_9526	4cb190364575d751463119e92857d019_3274	E_coli_7_00283	4840fb5d2d4897d217f65ba1ef1b22a7_3860
yegX		glycoside hydrolase family 25 protein	6	6	1	4	3742				818	818	818	81f6f292c45231c81cff920b572a826a_3307	d5a5a6aae91cabb186fe594057e8ea03_3378	ea50daa39c6c4a0574d509aa68b507b7_9530	4cb190364575d751463119e92857d019_3278	E_coli_7_00285	4840fb5d2d4897d217f65ba1ef1b22a7_3864
gatB		PTS galactitol transporter subunit IIB	6	6	1	4	3733				284	284	284	81f6f292c45231c81cff920b572a826a_3325	d5a5a6aae91cabb186fe594057e8ea03_3396	ea50daa39c6c4a0574d509aa68b507b7_9548	4cb190364575d751463119e92857d019_3296	E_coli_7_00294	4840fb5d2d4897d217f65ba1ef1b22a7_3882
mdtA		multidrug efflux RND transporter subunit MdtA	6	6	1	4	3719				1247	1367	1267	81f6f292c45231c81cff920b572a826a_3435	d5a5a6aae91cabb186fe594057e8ea03_3430	ea50daa39c6c4a0574d509aa68b507b7_87	4cb190364575d751463119e92857d019_3408	E_coli_7_00307	4840fb5d2d4897d217f65ba1ef1b22a7_3996
yegI		protein kinase YegI	6	6	1	4	3712				1940	1940	1940	81f6f292c45231c81cff920b572a826a_3447	d5a5a6aae91cabb186fe594057e8ea03_3442	ea50daa39c6c4a0574d509aa68b507b7_99	4cb190364575d751463119e92857d019_3420	E_coli_7_00311	4840fb5d2d4897d217f65ba1ef1b22a7_4008
wcaE		colanic acid biosynthesis glycosyltransferase WcaE	6	6	1	4	3696				746	746	746	81f6f292c45231c81cff920b572a826a_3479	d5a5a6aae91cabb186fe594057e8ea03_3474	ea50daa39c6c4a0574d509aa68b507b7_131	4cb190364575d751463119e92857d019_3452	E_coli_7_00326	4840fb5d2d4897d217f65ba1ef1b22a7_4040
wcaI		colanic acid biosynthesis fucosyltransferase WcaI	6	6	1	4	3691				779	1223	1149	81f6f292c45231c81cff920b572a826a_3489	d5a5a6aae91cabb186fe594057e8ea03_3484	ea50daa39c6c4a0574d509aa68b507b7_141	4cb190364575d751463119e92857d019_3462	E_coli_7_00331	4840fb5d2d4897d217f65ba1ef1b22a7_4050
cpsB		mannose-1-phosphate guanyltransferase	6	6	1	4	3690				1181	1436	1393	81f6f292c45231c81cff920b572a826a_3491	d5a5a6aae91cabb186fe594057e8ea03_3486	ea50daa39c6c4a0574d509aa68b507b7_143	4cb190364575d751463119e92857d019_3464	E_coli_7_00332	4840fb5d2d4897d217f65ba1ef1b22a7_4052
yiaN		2,3-diketo-L-gulonate transporter large permease YiaN	6	6	1	4	5120				1277	1277	1277	81f6f292c45231c81cff920b572a826a_261	d5a5a6aae91cabb186fe594057e8ea03_269	ea50daa39c6c4a0574d509aa68b507b7_6453	4cb190364575d751463119e92857d019_259	E_coli_7_02823	4840fb5d2d4897d217f65ba1ef1b22a7_845
menB		1,4-dihydroxy-2-naphthoyl-CoA synthase	6	6	1	4	4166				857	857	857	81f6f292c45231c81cff920b572a826a_2987	d5a5a6aae91cabb186fe594057e8ea03_3070	ea50daa39c6c4a0574d509aa68b507b7_9226	4cb190364575d751463119e92857d019_2976	E_coli_7_00134	4840fb5d2d4897d217f65ba1ef1b22a7_3560
dppB		dipeptide ABC transporter permease DppB	6	6	1	4	5084				1019	1019	1019	81f6f292c45231c81cff920b572a826a_338	d5a5a6aae91cabb186fe594057e8ea03_345	ea50daa39c6c4a0574d509aa68b507b7_6527	4cb190364575d751463119e92857d019_336	E_coli_7_01853	4840fb5d2d4897d217f65ba1ef1b22a7_921
cydX		cytochrome bd-I oxidase subunit CydX	6	6	1	4	58				113	113	113	81f6f292c45231c81cff920b572a826a_6166	d5a5a6aae91cabb186fe594057e8ea03_6512	ea50daa39c6c4a0574d509aa68b507b7_3132	4cb190364575d751463119e92857d019_6140	E_coli_7_03236	4840fb5d2d4897d217f65ba1ef1b22a7_6728
tsuA		thiosulfate transporter TsuA	6	6	1	4	1770				1004	1058	1049	81f6f292c45231c81cff920b572a826a_3591	d5a5a6aae91cabb186fe594057e8ea03_3561	ea50daa39c6c4a0574d509aa68b507b7_210	4cb190364575d751463119e92857d019_3537	E_coli_7_00368	4840fb5d2d4897d217f65ba1ef1b22a7_4129
tuf		elongation factor Tu	6	6	1	4	706				1184	1184	1184	81f6f292c45231c81cff920b572a826a_8708	d5a5a6aae91cabb186fe594057e8ea03_9147	ea50daa39c6c4a0574d509aa68b507b7_5553	4cb190364575d751463119e92857d019_8782	E_coli_7_04471	4840fb5d2d4897d217f65ba1ef1b22a7_9104
yecR		YecR-like lipofamily protein	6	6	1	4	2839				323	323	323	81f6f292c45231c81cff920b572a826a_3888	d5a5a6aae91cabb186fe594057e8ea03_3946	ea50daa39c6c4a0574d509aa68b507b7_614	4cb190364575d751463119e92857d019_3725	E_coli_7_00482	4840fb5d2d4897d217f65ba1ef1b22a7_4327
serB		phosphoserine phosphatase	6	6	1	4	1448				968	968	968	81f6f292c45231c81cff920b572a826a_7738	d5a5a6aae91cabb186fe594057e8ea03_8064	ea50daa39c6c4a0574d509aa68b507b7_4652	4cb190364575d751463119e92857d019_7666	E_coli_7_01059	4840fb5d2d4897d217f65ba1ef1b22a7_8310
melR		transcriptional regulator MelR	6	6	1	4	1549				908	908	908	81f6f292c45231c81cff920b572a826a_8374	d5a5a6aae91cabb186fe594057e8ea03_8746	ea50daa39c6c4a0574d509aa68b507b7_5151	4cb190364575d751463119e92857d019_8450	E_coli_7_02258	4840fb5d2d4897d217f65ba1ef1b22a7_8820
udk		uridine kinase	6	6	1	4	3708				641	641	641	81f6f292c45231c81cff920b572a826a_3455	d5a5a6aae91cabb186fe594057e8ea03_3450	ea50daa39c6c4a0574d509aa68b507b7_107	4cb190364575d751463119e92857d019_3428	E_coli_7_00315	4840fb5d2d4897d217f65ba1ef1b22a7_4016
nadD		nicotinate-nucleotide adenylyltransferase	6	6	1	4	5375				641	641	641	81f6f292c45231c81cff920b572a826a_6381	d5a5a6aae91cabb186fe594057e8ea03_6701	ea50daa39c6c4a0574d509aa68b507b7_3321	4cb190364575d751463119e92857d019_6355	E_coli_7_01323	4840fb5d2d4897d217f65ba1ef1b22a7_6915
aldB		aldehyde dehydrogenase AldB	6	6	1	4	5135				1538	1538	1538	81f6f292c45231c81cff920b572a826a_233	d5a5a6aae91cabb186fe594057e8ea03_245	ea50daa39c6c4a0574d509aa68b507b7_6425	4cb190364575d751463119e92857d019_231	E_coli_7_02837	4840fb5d2d4897d217f65ba1ef1b22a7_819
mntP		manganese efflux pump MntP	6	6	1	4	2924				566	566	566	81f6f292c45231c81cff920b572a826a_4056	d5a5a6aae91cabb186fe594057e8ea03_4116	ea50daa39c6c4a0574d509aa68b507b7_810	4cb190364575d751463119e92857d019_3893	E_coli_7_00579	4840fb5d2d4897d217f65ba1ef1b22a7_4499
ydfZ		putative selenium delivery protein YdfZ	6	6	1	4	3197				203	203	203	81f6f292c45231c81cff920b572a826a_4562	d5a5a6aae91cabb186fe594057e8ea03_4710	ea50daa39c6c4a0574d509aa68b507b7_1436	4cb190364575d751463119e92857d019_4525	E_coli_7_00826	4840fb5d2d4897d217f65ba1ef1b22a7_5129
yhbO		protein/nucleic acid deglycase	6	6	1	4	270				518	518	518	81f6f292c45231c81cff920b572a826a_1117	d5a5a6aae91cabb186fe594057e8ea03_1110	ea50daa39c6c4a0574d509aa68b507b7_7276	4cb190364575d751463119e92857d019_1127	E_coli_7_03574	4840fb5d2d4897d217f65ba1ef1b22a7_1676
sbmC		DNA gyrase inhibitor SbmC	6	6	1	4	1774				473	473	473	81f6f292c45231c81cff920b572a826a_3599	d5a5a6aae91cabb186fe594057e8ea03_3569	ea50daa39c6c4a0574d509aa68b507b7_218	4cb190364575d751463119e92857d019_3545	E_coli_7_00372	4840fb5d2d4897d217f65ba1ef1b22a7_4137
ccmB		heme exporter protein CcmB	6	6	1	4	4223				662	662	662	81f6f292c45231c81cff920b572a826a_3111	d5a5a6aae91cabb186fe594057e8ea03_3180	ea50daa39c6c4a0574d509aa68b507b7_9334	4cb190364575d751463119e92857d019_3084	E_coli_7_00188	4840fb5d2d4897d217f65ba1ef1b22a7_3670
ulaC		PTS ascorbate transporter subunit IIA	6	6	1	4	1625				464	464	464	81f6f292c45231c81cff920b572a826a_8212	d5a5a6aae91cabb186fe594057e8ea03_8421	ea50daa39c6c4a0574d509aa68b507b7_4989	4cb190364575d751463119e92857d019_8288	E_coli_7_02180	4840fb5d2d4897d217f65ba1ef1b22a7_8658
ribE		riboflavin synthase	6	6	1	4	3085				641	641	641	81f6f292c45231c81cff920b572a826a_4384	d5a5a6aae91cabb186fe594057e8ea03_4432	ea50daa39c6c4a0574d509aa68b507b7_1144	4cb190364575d751463119e92857d019_4225	E_coli_7_00739	4840fb5d2d4897d217f65ba1ef1b22a7_4835
yeaH		YeaH/YhbH family protein	6	6	1	4	2963				1283	1283	1283	81f6f292c45231c81cff920b572a826a_4134	d5a5a6aae91cabb186fe594057e8ea03_4194	ea50daa39c6c4a0574d509aa68b507b7_892	4cb190364575d751463119e92857d019_3971	E_coli_7_00616	4840fb5d2d4897d217f65ba1ef1b22a7_4581
WP_000825639.1		membrane protein	6	6	1	4	163				221	221	221	81f6f292c45231c81cff920b572a826a_897	d5a5a6aae91cabb186fe594057e8ea03_894	ea50daa39c6c4a0574d509aa68b507b7_7060	4cb190364575d751463119e92857d019_907	E_coli_7_03681	4840fb5d2d4897d217f65ba1ef1b22a7_1460
yfgM		ancillary SecYEG translocon subunit YfgM	6	6	1	4	3903				620	620	620	81f6f292c45231c81cff920b572a826a_2499	d5a5a6aae91cabb186fe594057e8ea03_2598	ea50daa39c6c4a0574d509aa68b507b7_8730	4cb190364575d751463119e92857d019_2503	E_coli_7_03461	4840fb5d2d4897d217f65ba1ef1b22a7_3058
group_3136	artJ	ABC transporter substrate-binding protein ArtJ	6	6	1	4	3400				731	731	731	81f6f292c45231c81cff920b572a826a_5893	d5a5a6aae91cabb186fe594057e8ea03_6241	ea50daa39c6c4a0574d509aa68b507b7_2863	4cb190364575d751463119e92857d019_5867	E_coli_7_03184	4840fb5d2d4897d217f65ba1ef1b22a7_6458
murI		glutamate racemase	6	6	1	4	702				857	857	857	81f6f292c45231c81cff920b572a826a_8740	d5a5a6aae91cabb186fe594057e8ea03_9179	ea50daa39c6c4a0574d509aa68b507b7_5585	4cb190364575d751463119e92857d019_8814	E_coli_7_04091	4840fb5d2d4897d217f65ba1ef1b22a7_3
vapB		toxin-antitoxin system antitoxin VapB	6	6	1	4	3956				227	227	227	81f6f292c45231c81cff920b572a826a_2577	d5a5a6aae91cabb186fe594057e8ea03_2676	ea50daa39c6c4a0574d509aa68b507b7_8808	4cb190364575d751463119e92857d019_2581	E_coli_7_03504	4840fb5d2d4897d217f65ba1ef1b22a7_3168
rpsP		30S ribosomal protein S16	6	6	1	4	4296				248	248	248	81f6f292c45231c81cff920b572a826a_2296	d5a5a6aae91cabb186fe594057e8ea03_2395	ea50daa39c6c4a0574d509aa68b507b7_8531	4cb190364575d751463119e92857d019_2300	E_coli_7_02600	4840fb5d2d4897d217f65ba1ef1b22a7_2855
cobU		bifunctional adenosylcobinamide kinase/adenosylcobinamide-phosphate guanylyltransferase	6	6	1	4	2701				542	545	544	81f6f292c45231c81cff920b572a826a_3650	d5a5a6aae91cabb186fe594057e8ea03_3636	ea50daa39c6c4a0574d509aa68b507b7_269	4cb190364575d751463119e92857d019_3553	E_coli_7_00400	4840fb5d2d4897d217f65ba1ef1b22a7_4145
accD		acetyl-CoA carboxylase, carboxyltransferase subunit beta	6	6	1	4	4116				914	914	914	81f6f292c45231c81cff920b572a826a_2887	d5a5a6aae91cabb186fe594057e8ea03_2968	ea50daa39c6c4a0574d509aa68b507b7_9126	4cb190364575d751463119e92857d019_2876	E_coli_7_00084	4840fb5d2d4897d217f65ba1ef1b22a7_3460
gltJ		glutamate/aspartate ABC transporter permease GltJ	6	6	1	4	5360				740	740	740	81f6f292c45231c81cff920b572a826a_6351	d5a5a6aae91cabb186fe594057e8ea03_6671	ea50daa39c6c4a0574d509aa68b507b7_3291	4cb190364575d751463119e92857d019_6325	E_coli_7_01308	4840fb5d2d4897d217f65ba1ef1b22a7_6885
dpiB		sensor histidine kinase DpiB	6	6	1	4	5394				1658	1658	1658	81f6f292c45231c81cff920b572a826a_6419	d5a5a6aae91cabb186fe594057e8ea03_6739	ea50daa39c6c4a0574d509aa68b507b7_3359	4cb190364575d751463119e92857d019_6393	E_coli_7_01342	4840fb5d2d4897d217f65ba1ef1b22a7_6953
group_3143	ribE	6,7-dimethyl-8-ribityllumazine synthase	6	6	1	4	5532				470	470	470	81f6f292c45231c81cff920b572a826a_6764	d5a5a6aae91cabb186fe594057e8ea03_7131	ea50daa39c6c4a0574d509aa68b507b7_3738	4cb190364575d751463119e92857d019_6738	E_coli_7_01511	4840fb5d2d4897d217f65ba1ef1b22a7_7322
flhD		flagellar transcriptional regulator FlhD	6	6	1	4	2849				350	350	350	81f6f292c45231c81cff920b572a826a_3908	d5a5a6aae91cabb186fe594057e8ea03_3968	ea50daa39c6c4a0574d509aa68b507b7_634	4cb190364575d751463119e92857d019_3745	E_coli_7_00491	4840fb5d2d4897d217f65ba1ef1b22a7_4347
yicN		DUF1198 domain-containing protein	6	6	1	4	5229				452	452	452	81f6f292c45231c81cff920b572a826a_84	d5a5a6aae91cabb186fe594057e8ea03_84	ea50daa39c6c4a0574d509aa68b507b7_6264	4cb190364575d751463119e92857d019_84	E_coli_7_02910	4840fb5d2d4897d217f65ba1ef1b22a7_658
yobD		DUF986 family protein	6	6	1	4	2925				458	458	458	81f6f292c45231c81cff920b572a826a_4058	d5a5a6aae91cabb186fe594057e8ea03_4118	ea50daa39c6c4a0574d509aa68b507b7_812	4cb190364575d751463119e92857d019_3895	E_coli_7_00580	4840fb5d2d4897d217f65ba1ef1b22a7_4501
WP_000959109.1		deaminated glutathione amidase	6	6	1	4	5388				788	788	788	81f6f292c45231c81cff920b572a826a_6407	d5a5a6aae91cabb186fe594057e8ea03_6727	ea50daa39c6c4a0574d509aa68b507b7_3347	4cb190364575d751463119e92857d019_6381	E_coli_7_01336	4840fb5d2d4897d217f65ba1ef1b22a7_6941
cytR		DNA-binding transcriptional regulator CytR	6	6	1	4	6036				1025	1025	1025	81f6f292c45231c81cff920b572a826a_8815	d5a5a6aae91cabb186fe594057e8ea03_9254	ea50daa39c6c4a0574d509aa68b507b7_5656	4cb190364575d751463119e92857d019_8889	E_coli_7_04057	4840fb5d2d4897d217f65ba1ef1b22a7_78
WP_001175589.1		helix-turn-helix domain-containing protein	6	6	1	4	5041				296	296	296	81f6f292c45231c81cff920b572a826a_426	d5a5a6aae91cabb186fe594057e8ea03_433	ea50daa39c6c4a0574d509aa68b507b7_6615	4cb190364575d751463119e92857d019_424	E_coli_7_01808	4840fb5d2d4897d217f65ba1ef1b22a7_1009
cobT		nicotinate-nucleotide--dimethylbenzimidazole phosphoribosyltransferase	6	6	1	4	2703				1079	1079	1079	81f6f292c45231c81cff920b572a826a_3654	d5a5a6aae91cabb186fe594057e8ea03_3640	ea50daa39c6c4a0574d509aa68b507b7_273	4cb190364575d751463119e92857d019_3557	E_coli_7_00402	4840fb5d2d4897d217f65ba1ef1b22a7_4149
dcuB		anaerobic C4-dicarboxylate transporter DcuB	6	6	1	4	1554				1340	1340	1340	81f6f292c45231c81cff920b572a826a_8364	d5a5a6aae91cabb186fe594057e8ea03_8736	ea50daa39c6c4a0574d509aa68b507b7_5141	4cb190364575d751463119e92857d019_8440	E_coli_7_02253	4840fb5d2d4897d217f65ba1ef1b22a7_8810
citT		citrate/succinate antiporter CitT	6	6	1	4	5401				1463	1463	1463	81f6f292c45231c81cff920b572a826a_6433	d5a5a6aae91cabb186fe594057e8ea03_6753	ea50daa39c6c4a0574d509aa68b507b7_3373	4cb190364575d751463119e92857d019_6407	E_coli_7_01349	4840fb5d2d4897d217f65ba1ef1b22a7_6967
murE		UDP-N-acetylmuramoyl-L-alanyl-D-glutamate--2,6-diaminopimelate ligase	6	6	1	4	503				1487	1487	1487	81f6f292c45231c81cff920b572a826a_7538	d5a5a6aae91cabb186fe594057e8ea03_7860	ea50daa39c6c4a0574d509aa68b507b7_4436	4cb190364575d751463119e92857d019_7466	E_coli_7_01153	4840fb5d2d4897d217f65ba1ef1b22a7_8106
uspC		universal stress protein UspC	6	6	1	4	2848				428	428	428	81f6f292c45231c81cff920b572a826a_3906	d5a5a6aae91cabb186fe594057e8ea03_3964	ea50daa39c6c4a0574d509aa68b507b7_632	4cb190364575d751463119e92857d019_3743	E_coli_7_00490	4840fb5d2d4897d217f65ba1ef1b22a7_4345
ytfE		iron-sulfur cluster repair protein YtfE	6	6	1	4	659				662	662	662	81f6f292c45231c81cff920b572a826a_8176	d5a5a6aae91cabb186fe594057e8ea03_8377	ea50daa39c6c4a0574d509aa68b507b7_4953	4cb190364575d751463119e92857d019_8254	E_coli_7_02164	4840fb5d2d4897d217f65ba1ef1b22a7_8616
glpC		anaerobic glycerol-3-phosphate dehydrogenase subunit GlpC	6	6	1	4	4183				1190	1190	1190	81f6f292c45231c81cff920b572a826a_3021	d5a5a6aae91cabb186fe594057e8ea03_3104	ea50daa39c6c4a0574d509aa68b507b7_9260	4cb190364575d751463119e92857d019_3010	E_coli_7_00151	4840fb5d2d4897d217f65ba1ef1b22a7_3594
yecJ		DUF2766 domain-containing protein	6	6	1	4	2841				251	251	251	81f6f292c45231c81cff920b572a826a_3892	d5a5a6aae91cabb186fe594057e8ea03_3950	ea50daa39c6c4a0574d509aa68b507b7_618	4cb190364575d751463119e92857d019_3729	E_coli_7_00483	4840fb5d2d4897d217f65ba1ef1b22a7_4331
yieE		DNA-binding transcriptional regulator YeiE	6	6	1	4	4263				881	881	881	81f6f292c45231c81cff920b572a826a_3196	d5a5a6aae91cabb186fe594057e8ea03_3265	ea50daa39c6c4a0574d509aa68b507b7_9419	4cb190364575d751463119e92857d019_3169	E_coli_7_00230	4840fb5d2d4897d217f65ba1ef1b22a7_3755
hdeD		acid-resistance protein HdeD	6	6	1	4	5048				572	572	572	81f6f292c45231c81cff920b572a826a_410	d5a5a6aae91cabb186fe594057e8ea03_417	ea50daa39c6c4a0574d509aa68b507b7_6599	4cb190364575d751463119e92857d019_408	E_coli_7_01816	4840fb5d2d4897d217f65ba1ef1b22a7_993
WP_000593555.1		type II toxin-antitoxin system HicB family antitoxin	6	6	1	4	5016				359	359	359	81f6f292c45231c81cff920b572a826a_472	d5a5a6aae91cabb186fe594057e8ea03_479	ea50daa39c6c4a0574d509aa68b507b7_6657	4cb190364575d751463119e92857d019_470	E_coli_7_01788	4840fb5d2d4897d217f65ba1ef1b22a7_1055
ldtA		L,D-transpeptidase	6	6	1	4	2704				935	935	935	81f6f292c45231c81cff920b572a826a_3656	d5a5a6aae91cabb186fe594057e8ea03_3642	ea50daa39c6c4a0574d509aa68b507b7_275	4cb190364575d751463119e92857d019_3559	E_coli_7_00403	4840fb5d2d4897d217f65ba1ef1b22a7_4151
malE		maltose/maltodextrin ABC transporter substrate-binding protein MalE	6	6	1	4	786				1190	1190	1190	81f6f292c45231c81cff920b572a826a_8534	d5a5a6aae91cabb186fe594057e8ea03_9026	ea50daa39c6c4a0574d509aa68b507b7_5432	4cb190364575d751463119e92857d019_8610	E_coli_7_02342	4840fb5d2d4897d217f65ba1ef1b22a7_8980
pdeD		cyclic diguanylate phosphodiesterase	6	6	1	4	2930				1598	1598	1598	81f6f292c45231c81cff920b572a826a_4068	d5a5a6aae91cabb186fe594057e8ea03_4128	ea50daa39c6c4a0574d509aa68b507b7_822	4cb190364575d751463119e92857d019_3905	E_coli_7_00586	4840fb5d2d4897d217f65ba1ef1b22a7_4511
rfaD		ADP-glyceromanno-heptose 6-epimerase	6	6	1	4	5273				932	932	932	81f6f292c45231c81cff920b572a826a_175	d5a5a6aae91cabb186fe594057e8ea03_169	ea50daa39c6c4a0574d509aa68b507b7_6351	4cb190364575d751463119e92857d019_171	E_coli_7_02867	4840fb5d2d4897d217f65ba1ef1b22a7_747
hpaH		2-oxo-hepta-3-ene-1,7-dioic acid hydratase	6	6	1	4	1406				803	803	803	81f6f292c45231c81cff920b572a826a_7817	d5a5a6aae91cabb186fe594057e8ea03_8149	ea50daa39c6c4a0574d509aa68b507b7_4737	4cb190364575d751463119e92857d019_7855	E_coli_7_01018	4840fb5d2d4897d217f65ba1ef1b22a7_8395
fumE		fumarase E	6	6	1	4	6114				509	509	509	81f6f292c45231c81cff920b572a826a_1601	d5a5a6aae91cabb186fe594057e8ea03_1692	ea50daa39c6c4a0574d509aa68b507b7_7854	4cb190364575d751463119e92857d019_1613	E_coli_7_02507	4840fb5d2d4897d217f65ba1ef1b22a7_2154
tyrA		bifunctional chorismate mutase/prephenate dehydrogenase	6	6	1	4	3817				1121	1121	1121	81f6f292c45231c81cff920b572a826a_2314	d5a5a6aae91cabb186fe594057e8ea03_2413	ea50daa39c6c4a0574d509aa68b507b7_8549	4cb190364575d751463119e92857d019_2318	E_coli_7_02591	4840fb5d2d4897d217f65ba1ef1b22a7_2873
hypA		hydrogenase maturation nickel metallochaperone HypA	6	6	1	4	1059				350	350	350	81f6f292c45231c81cff920b572a826a_2115	d5a5a6aae91cabb186fe594057e8ea03_2216	ea50daa39c6c4a0574d509aa68b507b7_8328	4cb190364575d751463119e92857d019_2120	E_coli_7_02689	4840fb5d2d4897d217f65ba1ef1b22a7_2654
ycfH		metal-dependent hydrolase	6	6	1	4	4389				797	797	797	81f6f292c45231c81cff920b572a826a_5425	d5a5a6aae91cabb186fe594057e8ea03_5676	ea50daa39c6c4a0574d509aa68b507b7_2383	4cb190364575d751463119e92857d019_5402	E_coli_7_03801	4840fb5d2d4897d217f65ba1ef1b22a7_5970
pmrD		signal transduction protein PmrD	6	6	1	4	4169				266	266	266	81f6f292c45231c81cff920b572a826a_2993	d5a5a6aae91cabb186fe594057e8ea03_3076	ea50daa39c6c4a0574d509aa68b507b7_9232	4cb190364575d751463119e92857d019_2982	E_coli_7_00137	4840fb5d2d4897d217f65ba1ef1b22a7_3566
rplD		50S ribosomal protein L4	6	6	1	4	4853				605	605	605	81f6f292c45231c81cff920b572a826a_786	d5a5a6aae91cabb186fe594057e8ea03_783	ea50daa39c6c4a0574d509aa68b507b7_6949	4cb190364575d751463119e92857d019_796	E_coli_7_01620	4840fb5d2d4897d217f65ba1ef1b22a7_1349
hprR		response regulator transcription factor HprR	6	6	1	4	2783				671	782	689	81f6f292c45231c81cff920b572a826a_3769	d5a5a6aae91cabb186fe594057e8ea03_3817	ea50daa39c6c4a0574d509aa68b507b7_481	4cb190364575d751463119e92857d019_3604	E_coli_7_00425	4840fb5d2d4897d217f65ba1ef1b22a7_4196
hisQ		histidine ABC transporter permease HisQ	6	6	1	4	4124				686	686	686	81f6f292c45231c81cff920b572a826a_2903	d5a5a6aae91cabb186fe594057e8ea03_2984	ea50daa39c6c4a0574d509aa68b507b7_9142	4cb190364575d751463119e92857d019_2892	E_coli_7_00092	4840fb5d2d4897d217f65ba1ef1b22a7_3476
yciO		L-threonylcarbamoyladenylate synthase	6	6	1	4	4540				620	620	620	81f6f292c45231c81cff920b572a826a_5118	d5a5a6aae91cabb186fe594057e8ea03_5249	ea50daa39c6c4a0574d509aa68b507b7_1956	4cb190364575d751463119e92857d019_5089	E_coli_7_02033	4840fb5d2d4897d217f65ba1ef1b22a7_5661
sodC		superoxide dismutase [Cu-Zn] SodC	6	6	1	4	3102				521	521	521	81f6f292c45231c81cff920b572a826a_4418	d5a5a6aae91cabb186fe594057e8ea03_4466	ea50daa39c6c4a0574d509aa68b507b7_1178	4cb190364575d751463119e92857d019_4259	E_coli_7_00756	4840fb5d2d4897d217f65ba1ef1b22a7_4869
yciG		general stress protein	6	6	1	4	4532				179	179	179	81f6f292c45231c81cff920b572a826a_5135	d5a5a6aae91cabb186fe594057e8ea03_5266	ea50daa39c6c4a0574d509aa68b507b7_1973	4cb190364575d751463119e92857d019_5106	E_coli_7_02040	4840fb5d2d4897d217f65ba1ef1b22a7_5678
paaI		hydroxyphenylacetyl-CoA thioesterase PaaI	6	6	1	4	4649				422	422	422	81f6f292c45231c81cff920b572a826a_4900	d5a5a6aae91cabb186fe594057e8ea03_5031	ea50daa39c6c4a0574d509aa68b507b7_1746	4cb190364575d751463119e92857d019_4871	E_coli_7_01927	4840fb5d2d4897d217f65ba1ef1b22a7_5447
hcaT		3-phenylpropionate MFS transporter	6	6	1	4	3879				1139	1139	1139	81f6f292c45231c81cff920b572a826a_2451	d5a5a6aae91cabb186fe594057e8ea03_2552	ea50daa39c6c4a0574d509aa68b507b7_8684	4cb190364575d751463119e92857d019_2455	E_coli_7_03438	4840fb5d2d4897d217f65ba1ef1b22a7_3010
murA		UDP-N-acetylglucosamine 1-carboxyvinyltransferase	6	6	1	4	235				1259	1259	1259	81f6f292c45231c81cff920b572a826a_1041	d5a5a6aae91cabb186fe594057e8ea03_1034	ea50daa39c6c4a0574d509aa68b507b7_7200	4cb190364575d751463119e92857d019_1051	E_coli_7_03610	4840fb5d2d4897d217f65ba1ef1b22a7_1600
livJ		branched chain amino acid ABC transporter substrate-binding protein LivJ	6	6	1	4	4994				1103	1103	1103	81f6f292c45231c81cff920b572a826a_516	d5a5a6aae91cabb186fe594057e8ea03_523	ea50daa39c6c4a0574d509aa68b507b7_6701	4cb190364575d751463119e92857d019_514	E_coli_7_01766	4840fb5d2d4897d217f65ba1ef1b22a7_1099
WP_001253418.1		YceO family protein	6	6	1	4	4348				113	113	113	81f6f292c45231c81cff920b572a826a_5507	d5a5a6aae91cabb186fe594057e8ea03_5758	ea50daa39c6c4a0574d509aa68b507b7_2465	4cb190364575d751463119e92857d019_5484	E_coli_7_03842	4840fb5d2d4897d217f65ba1ef1b22a7_6052
ypdA		two-component system sensor histidine kinase YpdA	6	6	1	4	4044				1697	1697	1697	81f6f292c45231c81cff920b572a826a_2764	d5a5a6aae91cabb186fe594057e8ea03_2863	ea50daa39c6c4a0574d509aa68b507b7_9021	4cb190364575d751463119e92857d019_2771	E_coli_7_00026	4840fb5d2d4897d217f65ba1ef1b22a7_3355
hchA		protein deglycase HchA	6	6	1	4	2785				851	851	851	81f6f292c45231c81cff920b572a826a_3773	d5a5a6aae91cabb186fe594057e8ea03_3821	ea50daa39c6c4a0574d509aa68b507b7_485	4cb190364575d751463119e92857d019_3608	E_coli_7_00427	4840fb5d2d4897d217f65ba1ef1b22a7_4200
gsiC		glutathione ABC transporter permease GsiC	6	6	1	4	3371				920	920	920	81f6f292c45231c81cff920b572a826a_5951	d5a5a6aae91cabb186fe594057e8ea03_6299	ea50daa39c6c4a0574d509aa68b507b7_2921	4cb190364575d751463119e92857d019_5925	E_coli_7_03336	4840fb5d2d4897d217f65ba1ef1b22a7_6516
WP_000511287.1		membrane protein	6	6	1	4	5213				449	449	449	81f6f292c45231c81cff920b572a826a_52	d5a5a6aae91cabb186fe594057e8ea03_52	ea50daa39c6c4a0574d509aa68b507b7_6234	4cb190364575d751463119e92857d019_52	E_coli_7_02924	4840fb5d2d4897d217f65ba1ef1b22a7_626
minC		septum site-determining protein MinC	6	6	1	4	4448				695	695	695	81f6f292c45231c81cff920b572a826a_5313	d5a5a6aae91cabb186fe594057e8ea03_5446	ea50daa39c6c4a0574d509aa68b507b7_2265	4cb190364575d751463119e92857d019_5286	E_coli_7_02127	4840fb5d2d4897d217f65ba1ef1b22a7_5854
yjeT		DUF2065 domain-containing protein	6	6	1	4	1606				197	197	197	81f6f292c45231c81cff920b572a826a_8250	d5a5a6aae91cabb186fe594057e8ea03_8459	ea50daa39c6c4a0574d509aa68b507b7_5027	4cb190364575d751463119e92857d019_8326	E_coli_7_02199	4840fb5d2d4897d217f65ba1ef1b22a7_8696
gadC		acid resistance gamma-aminobutyrate antiporter GadC	6	6	1	4	3255				1535	1535	1535	81f6f292c45231c81cff920b572a826a_4680	d5a5a6aae91cabb186fe594057e8ea03_4837	ea50daa39c6c4a0574d509aa68b507b7_1552	4cb190364575d751463119e92857d019_4651	E_coli_7_00883	4840fb5d2d4897d217f65ba1ef1b22a7_5247
yiiS		DUF406 domain-containing protein	6	6	1	4	6048				299	299	299	81f6f292c45231c81cff920b572a826a_8839	d5a5a6aae91cabb186fe594057e8ea03_9278	ea50daa39c6c4a0574d509aa68b507b7_5680	4cb190364575d751463119e92857d019_8913	E_coli_7_04045	4840fb5d2d4897d217f65ba1ef1b22a7_102
uhpA		transcriptional regulator UhpA	6	6	1	4	5223				590	590	590	81f6f292c45231c81cff920b572a826a_72	d5a5a6aae91cabb186fe594057e8ea03_72	ea50daa39c6c4a0574d509aa68b507b7_6252	4cb190364575d751463119e92857d019_72	E_coli_7_02916	4840fb5d2d4897d217f65ba1ef1b22a7_646
ytfJ		YtfJ family protein	6	6	1	4	653				557	557	557	81f6f292c45231c81cff920b572a826a_8164	d5a5a6aae91cabb186fe594057e8ea03_8365	ea50daa39c6c4a0574d509aa68b507b7_4941	4cb190364575d751463119e92857d019_8242	E_coli_7_02158	4840fb5d2d4897d217f65ba1ef1b22a7_8604
hipB		type II toxin-antitoxin system antitoxin HipB	6	6	1	4	3237				266	266	266	81f6f292c45231c81cff920b572a826a_4642	d5a5a6aae91cabb186fe594057e8ea03_4795	ea50daa39c6c4a0574d509aa68b507b7_1514	4cb190364575d751463119e92857d019_4605	E_coli_7_00866	4840fb5d2d4897d217f65ba1ef1b22a7_5209
ydiK		AI-2E family transporter YdiK	6	6	1	4	3061				1112	1112	1112	81f6f292c45231c81cff920b572a826a_4328	d5a5a6aae91cabb186fe594057e8ea03_4376	ea50daa39c6c4a0574d509aa68b507b7_1090	4cb190364575d751463119e92857d019_4169	E_coli_7_00713	4840fb5d2d4897d217f65ba1ef1b22a7_4779
rpoD		RNA polymerase sigma factor RpoD	6	6	1	4	5958				1841	1841	1841	81f6f292c45231c81cff920b572a826a_1299	d5a5a6aae91cabb186fe594057e8ea03_1390	ea50daa39c6c4a0574d509aa68b507b7_7456	4cb190364575d751463119e92857d019_1311	E_coli_7_03904	4840fb5d2d4897d217f65ba1ef1b22a7_1860
nusB		transcription antitermination factor NusB	6	6	1	4	5533				419	419	419	81f6f292c45231c81cff920b572a826a_6762	d5a5a6aae91cabb186fe594057e8ea03_7129	ea50daa39c6c4a0574d509aa68b507b7_3736	4cb190364575d751463119e92857d019_6736	E_coli_7_01510	4840fb5d2d4897d217f65ba1ef1b22a7_7320
yjjU		patatin family protein	6	6	1	4	1459				1073	1073	1073	81f6f292c45231c81cff920b572a826a_7760	d5a5a6aae91cabb186fe594057e8ea03_8086	ea50daa39c6c4a0574d509aa68b507b7_4674	4cb190364575d751463119e92857d019_7688	E_coli_7_01048	4840fb5d2d4897d217f65ba1ef1b22a7_8332
rpsH		30S ribosomal protein S8	6	6	1	4	130				392	392	392	81f6f292c45231c81cff920b572a826a_812	d5a5a6aae91cabb186fe594057e8ea03_809	ea50daa39c6c4a0574d509aa68b507b7_6975	4cb190364575d751463119e92857d019_822	E_coli_7_01607	4840fb5d2d4897d217f65ba1ef1b22a7_1375
kefG		glutathione-regulated potassium-efflux system ancillary protein KefG	6	6	1	4	4882				551	551	551	81f6f292c45231c81cff920b572a826a_720	d5a5a6aae91cabb186fe594057e8ea03_745	ea50daa39c6c4a0574d509aa68b507b7_6911	4cb190364575d751463119e92857d019_730	E_coli_7_01653	4840fb5d2d4897d217f65ba1ef1b22a7_1311
yjgA		ribosome-associated protein	6	6	1	4	637				551	551	551	81f6f292c45231c81cff920b572a826a_8132	d5a5a6aae91cabb186fe594057e8ea03_8333	ea50daa39c6c4a0574d509aa68b507b7_4909	4cb190364575d751463119e92857d019_8210	E_coli_7_02142	4840fb5d2d4897d217f65ba1ef1b22a7_8572
glpK		glycerol kinase GlpK	6	6	1	4	6044				1508	1508	1508	81f6f292c45231c81cff920b572a826a_8831	d5a5a6aae91cabb186fe594057e8ea03_9270	ea50daa39c6c4a0574d509aa68b507b7_5672	4cb190364575d751463119e92857d019_8905	E_coli_7_04049	4840fb5d2d4897d217f65ba1ef1b22a7_94
btuD		vitamin B12 ABC transporter ATP-binding protein BtuD	6	6	1	4	3040				749	749	749	81f6f292c45231c81cff920b572a826a_4283	d5a5a6aae91cabb186fe594057e8ea03_4331	ea50daa39c6c4a0574d509aa68b507b7_1045	4cb190364575d751463119e92857d019_4124	E_coli_7_00691	4840fb5d2d4897d217f65ba1ef1b22a7_4734
yifK		amino acid permease	6	6	1	4	1180				1385	1385	1385	81f6f292c45231c81cff920b572a826a_9108	d5a5a6aae91cabb186fe594057e8ea03_9543	ea50daa39c6c4a0574d509aa68b507b7_5947	4cb190364575d751463119e92857d019_9182	E_coli_7_04246	4840fb5d2d4897d217f65ba1ef1b22a7_377
ompF		porin OmpF	6	6	1	4	3469				1088	1088	1088	81f6f292c45231c81cff920b572a826a_5752	d5a5a6aae91cabb186fe594057e8ea03_6100	ea50daa39c6c4a0574d509aa68b507b7_2722	4cb190364575d751463119e92857d019_5726	E_coli_7_03115	4840fb5d2d4897d217f65ba1ef1b22a7_6317
yedJ		phosphohydrolase	6	6	1	4	2788				695	695	695	81f6f292c45231c81cff920b572a826a_3779	d5a5a6aae91cabb186fe594057e8ea03_3827	ea50daa39c6c4a0574d509aa68b507b7_493	4cb190364575d751463119e92857d019_3616	E_coli_7_00430	4840fb5d2d4897d217f65ba1ef1b22a7_4206
tesB		acyl-CoA thioesterase II	6	6	1	4	5571				860	860	860	81f6f292c45231c81cff920b572a826a_6690	d5a5a6aae91cabb186fe594057e8ea03_7051	ea50daa39c6c4a0574d509aa68b507b7_3658	4cb190364575d751463119e92857d019_6664	E_coli_7_01474	4840fb5d2d4897d217f65ba1ef1b22a7_7242
dacC		serine-type D-Ala-D-Ala carboxypeptidase	6	6	1	4	3379				1202	1202	1202	81f6f292c45231c81cff920b572a826a_5935	d5a5a6aae91cabb186fe594057e8ea03_6283	ea50daa39c6c4a0574d509aa68b507b7_2905	4cb190364575d751463119e92857d019_5909	E_coli_7_03344	4840fb5d2d4897d217f65ba1ef1b22a7_6500
cheB		protein-glutamate methylesterase/protein glutamine deamidase	6	6	1	4	2858				1049	1049	1049	81f6f292c45231c81cff920b572a826a_3926	d5a5a6aae91cabb186fe594057e8ea03_3986	ea50daa39c6c4a0574d509aa68b507b7_652	4cb190364575d751463119e92857d019_3763	E_coli_7_00500	4840fb5d2d4897d217f65ba1ef1b22a7_4365
bssS		biofilm formation regulator BssS	6	6	1	4	4350				254	254	254	81f6f292c45231c81cff920b572a826a_5503	d5a5a6aae91cabb186fe594057e8ea03_5754	ea50daa39c6c4a0574d509aa68b507b7_2461	4cb190364575d751463119e92857d019_5480	E_coli_7_03840	4840fb5d2d4897d217f65ba1ef1b22a7_6048
rpmD		50S ribosomal protein L30	6	6	1	4	134				179	179	179	81f6f292c45231c81cff920b572a826a_820	d5a5a6aae91cabb186fe594057e8ea03_817	ea50daa39c6c4a0574d509aa68b507b7_6983	4cb190364575d751463119e92857d019_830	E_coli_7_01603	4840fb5d2d4897d217f65ba1ef1b22a7_1383
bamA		outer membrane protein assembly factor BamA	6	6	1	4	2547				2432	2432	2432	81f6f292c45231c81cff920b572a826a_7356	d5a5a6aae91cabb186fe594057e8ea03_7673	ea50daa39c6c4a0574d509aa68b507b7_4254	4cb190364575d751463119e92857d019_7282	E_coli_7_01243	4840fb5d2d4897d217f65ba1ef1b22a7_7924
ytfK		DUF1107 domain-containing protein	6	6	1	4	652				206	206	206	81f6f292c45231c81cff920b572a826a_8162	d5a5a6aae91cabb186fe594057e8ea03_8363	ea50daa39c6c4a0574d509aa68b507b7_4939	4cb190364575d751463119e92857d019_8240	E_coli_7_02157	4840fb5d2d4897d217f65ba1ef1b22a7_8602
ycgX		DUF1398 domain-containing protein	6	6	1	4	4429				404	404	404	81f6f292c45231c81cff920b572a826a_5349	d5a5a6aae91cabb186fe594057e8ea03_5484	ea50daa39c6c4a0574d509aa68b507b7_2303	4cb190364575d751463119e92857d019_5322	E_coli_7_03698	4840fb5d2d4897d217f65ba1ef1b22a7_5890
sanA		outer membrane permeability protein SanA	6	6	1	4	4276				719	719	719	81f6f292c45231c81cff920b572a826a_3222	d5a5a6aae91cabb186fe594057e8ea03_3291	ea50daa39c6c4a0574d509aa68b507b7_9445	4cb190364575d751463119e92857d019_3195	E_coli_7_00243	4840fb5d2d4897d217f65ba1ef1b22a7_3781
yidE		putative transporter	6	6	1	4	5205				1661	1661	1661	81f6f292c45231c81cff920b572a826a_38	d5a5a6aae91cabb186fe594057e8ea03_38	ea50daa39c6c4a0574d509aa68b507b7_6220	4cb190364575d751463119e92857d019_38	E_coli_7_02932	4840fb5d2d4897d217f65ba1ef1b22a7_612
dgcQ		cellulose biosynthesis regulator diguanylate cyclase DgcQ	6	6	1	4	2794				1694	1694	1694	81f6f292c45231c81cff920b572a826a_3791	d5a5a6aae91cabb186fe594057e8ea03_3839	ea50daa39c6c4a0574d509aa68b507b7_505	4cb190364575d751463119e92857d019_3628	E_coli_7_00436	4840fb5d2d4897d217f65ba1ef1b22a7_4218
rbsK		ribokinase	6	6	1	4	1225				929	929	929	81f6f292c45231c81cff920b572a826a_9198	d5a5a6aae91cabb186fe594057e8ea03_9633	ea50daa39c6c4a0574d509aa68b507b7_6073	4cb190364575d751463119e92857d019_9272	E_coli_7_03002	4840fb5d2d4897d217f65ba1ef1b22a7_467
cyuP		amino acid permease	6	6	1	4	5912				1331	1331	1331	81f6f292c45231c81cff920b572a826a_1204	d5a5a6aae91cabb186fe594057e8ea03_1199	ea50daa39c6c4a0574d509aa68b507b7_7363	4cb190364575d751463119e92857d019_1216	E_coli_7_03859	4840fb5d2d4897d217f65ba1ef1b22a7_1765
group_3212	asd	aspartate-semialdehyde dehydrogenase	6	6	1	4	4963				1103	1103	1103	81f6f292c45231c81cff920b572a826a_558	d5a5a6aae91cabb186fe594057e8ea03_577	ea50daa39c6c4a0574d509aa68b507b7_6755	4cb190364575d751463119e92857d019_568	E_coli_7_01739	4840fb5d2d4897d217f65ba1ef1b22a7_1153
yggX		oxidative damage protection protein	6	6	1	4	397				275	275	275	81f6f292c45231c81cff920b572a826a_1529	d5a5a6aae91cabb186fe594057e8ea03_1626	ea50daa39c6c4a0574d509aa68b507b7_7790	4cb190364575d751463119e92857d019_1549	E_coli_7_02542	4840fb5d2d4897d217f65ba1ef1b22a7_2092
ydeN		sulfatase	6	6	1	4	3248				1682	1682	1682	81f6f292c45231c81cff920b572a826a_4666	d5a5a6aae91cabb186fe594057e8ea03_4819	ea50daa39c6c4a0574d509aa68b507b7_1538	4cb190364575d751463119e92857d019_4637	E_coli_7_00877	4840fb5d2d4897d217f65ba1ef1b22a7_5233
rho		transcription termination factor Rho	6	6	1	4	1194				1259	1259	1259	81f6f292c45231c81cff920b572a826a_9134	d5a5a6aae91cabb186fe594057e8ea03_9569	ea50daa39c6c4a0574d509aa68b507b7_5973	4cb190364575d751463119e92857d019_9208	E_coli_7_04232	4840fb5d2d4897d217f65ba1ef1b22a7_403
wcaJ		undecaprenyl-phosphate glucose phosphotransferase	6	6	1	4	3688				1394	1394	1394	81f6f292c45231c81cff920b572a826a_3495	d5a5a6aae91cabb186fe594057e8ea03_3490	ea50daa39c6c4a0574d509aa68b507b7_147	4cb190364575d751463119e92857d019_3468	E_coli_7_00334	4840fb5d2d4897d217f65ba1ef1b22a7_4056
yfjF		RnfH family protein	6	6	1	4	4305				290	290	290	81f6f292c45231c81cff920b572a826a_2278	d5a5a6aae91cabb186fe594057e8ea03_2379	ea50daa39c6c4a0574d509aa68b507b7_8515	4cb190364575d751463119e92857d019_2282	E_coli_7_02609	4840fb5d2d4897d217f65ba1ef1b22a7_2839
yfcG		GSH-dependent disulfide bond oxidoreductase	6	6	1	4	4130				647	647	647	81f6f292c45231c81cff920b572a826a_2915	d5a5a6aae91cabb186fe594057e8ea03_2996	ea50daa39c6c4a0574d509aa68b507b7_9154	4cb190364575d751463119e92857d019_2904	E_coli_7_00098	4840fb5d2d4897d217f65ba1ef1b22a7_3488
fxsA		membrane protein FxsA	6	6	1	4	1572				476	476	476	81f6f292c45231c81cff920b572a826a_8327	d5a5a6aae91cabb186fe594057e8ea03_8542	ea50daa39c6c4a0574d509aa68b507b7_5104	4cb190364575d751463119e92857d019_8403	E_coli_7_02235	4840fb5d2d4897d217f65ba1ef1b22a7_8773
fliK		flagellar hook length control protein FliK	6	6	1	4	2806				1127	1127	1127	81f6f292c45231c81cff920b572a826a_3815	d5a5a6aae91cabb186fe594057e8ea03_3863	ea50daa39c6c4a0574d509aa68b507b7_529	4cb190364575d751463119e92857d019_3652	E_coli_7_00448	4840fb5d2d4897d217f65ba1ef1b22a7_4242
yhhL		DUF1145 family protein	6	6	1	4	5000				269	269	269	81f6f292c45231c81cff920b572a826a_504	d5a5a6aae91cabb186fe594057e8ea03_511	ea50daa39c6c4a0574d509aa68b507b7_6689	4cb190364575d751463119e92857d019_502	E_coli_7_01772	4840fb5d2d4897d217f65ba1ef1b22a7_1087
ulaA		PTS ascorbate transporter subunit IIC	6	6	1	4	1623				1397	1397	1397	81f6f292c45231c81cff920b572a826a_8216	d5a5a6aae91cabb186fe594057e8ea03_8425	ea50daa39c6c4a0574d509aa68b507b7_4993	4cb190364575d751463119e92857d019_8292	E_coli_7_02182	4840fb5d2d4897d217f65ba1ef1b22a7_8662
yggE		oxidative stress defense protein	6	6	1	4	6126				740	740	740	81f6f292c45231c81cff920b572a826a_1625	d5a5a6aae91cabb186fe594057e8ea03_1716	ea50daa39c6c4a0574d509aa68b507b7_7880	4cb190364575d751463119e92857d019_1637	E_coli_7_02495	4840fb5d2d4897d217f65ba1ef1b22a7_2178
group_3223	flgM	anti-sigma-28 factor FlgM	6	6	1	4	4361				293	293	293	81f6f292c45231c81cff920b572a826a_5481	d5a5a6aae91cabb186fe594057e8ea03_5732	ea50daa39c6c4a0574d509aa68b507b7_2439	4cb190364575d751463119e92857d019_5458	E_coli_7_03829	4840fb5d2d4897d217f65ba1ef1b22a7_6026
cysK		cysteine synthase A	6	6	1	4	4016				971	971	971	81f6f292c45231c81cff920b572a826a_2687	d5a5a6aae91cabb186fe594057e8ea03_2786	ea50daa39c6c4a0574d509aa68b507b7_8952	4cb190364575d751463119e92857d019_2691	E_coli_7_04550	4840fb5d2d4897d217f65ba1ef1b22a7_3278
ygiQ		YgiQ family radical SAM protein	6	6	1	4	6010				2219	2219	2219	81f6f292c45231c81cff920b572a826a_1396	d5a5a6aae91cabb186fe594057e8ea03_1487	ea50daa39c6c4a0574d509aa68b507b7_7553	4cb190364575d751463119e92857d019_1416	E_coli_7_03950	4840fb5d2d4897d217f65ba1ef1b22a7_1957
ypeC		DUF2502 domain-containing protein	6	6	1	4	4034				326	326	326	81f6f292c45231c81cff920b572a826a_2744	d5a5a6aae91cabb186fe594057e8ea03_2843	ea50daa39c6c4a0574d509aa68b507b7_9001	4cb190364575d751463119e92857d019_2751	E_coli_7_00016	4840fb5d2d4897d217f65ba1ef1b22a7_3335
nudE		ADP compounds hydrolase NudE	6	6	1	4	4922				560	560	560	81f6f292c45231c81cff920b572a826a_640	d5a5a6aae91cabb186fe594057e8ea03_655	ea50daa39c6c4a0574d509aa68b507b7_6831	4cb190364575d751463119e92857d019_650	E_coli_7_01698	4840fb5d2d4897d217f65ba1ef1b22a7_1231
accB		acetyl-CoA carboxylase biotin carboxyl carrier protein	6	6	1	4	175				470	470	470	81f6f292c45231c81cff920b572a826a_921	d5a5a6aae91cabb186fe594057e8ea03_918	ea50daa39c6c4a0574d509aa68b507b7_7084	4cb190364575d751463119e92857d019_931	E_coli_7_03668	4840fb5d2d4897d217f65ba1ef1b22a7_1484
ybgS		YbgS-like family protein	6	6	1	4	70				380	380	380	81f6f292c45231c81cff920b572a826a_6118	d5a5a6aae91cabb186fe594057e8ea03_6464	ea50daa39c6c4a0574d509aa68b507b7_3084	4cb190364575d751463119e92857d019_6092	E_coli_7_03255	4840fb5d2d4897d217f65ba1ef1b22a7_6683
group_323	fliS	flagellar export chaperone FliS	6	6	1	4	2819				410	410	410	81f6f292c45231c81cff920b572a826a_3841	d5a5a6aae91cabb186fe594057e8ea03_3899	ea50daa39c6c4a0574d509aa68b507b7_565	4cb190364575d751463119e92857d019_3678	E_coli_7_00461	4840fb5d2d4897d217f65ba1ef1b22a7_4280
yqaA		DedA family protein	6	6	1	4	1094				428	428	428	81f6f292c45231c81cff920b572a826a_2198	d5a5a6aae91cabb186fe594057e8ea03_2299	ea50daa39c6c4a0574d509aa68b507b7_8407	4cb190364575d751463119e92857d019_2199	E_coli_7_02649	4840fb5d2d4897d217f65ba1ef1b22a7_2737
hflK		FtsH protease activity modulator HflK	6	6	1	4	1604				1259	1259	1259	81f6f292c45231c81cff920b572a826a_8254	d5a5a6aae91cabb186fe594057e8ea03_8463	ea50daa39c6c4a0574d509aa68b507b7_5031	4cb190364575d751463119e92857d019_8330	E_coli_7_02201	4840fb5d2d4897d217f65ba1ef1b22a7_8700
rimJ		ribosomal protein S5-alanine N-acetyltransferase	6	6	1	4	4356				584	584	584	81f6f292c45231c81cff920b572a826a_5491	d5a5a6aae91cabb186fe594057e8ea03_5742	ea50daa39c6c4a0574d509aa68b507b7_2449	4cb190364575d751463119e92857d019_5468	E_coli_7_03834	4840fb5d2d4897d217f65ba1ef1b22a7_6036
yhjD		inner membrane protein YhjD	6	6	1	4	5061				1013	1013	1013	81f6f292c45231c81cff920b572a826a_386	d5a5a6aae91cabb186fe594057e8ea03_393	ea50daa39c6c4a0574d509aa68b507b7_6575	4cb190364575d751463119e92857d019_384	E_coli_7_01829	4840fb5d2d4897d217f65ba1ef1b22a7_969
pqiB		intermembrane transport protein PqiB	6	6	1	4	3491				1640	1640	1640	81f6f292c45231c81cff920b572a826a_5708	d5a5a6aae91cabb186fe594057e8ea03_6056	ea50daa39c6c4a0574d509aa68b507b7_2678	4cb190364575d751463119e92857d019_5682	E_coli_7_03093	4840fb5d2d4897d217f65ba1ef1b22a7_6273
sutR		DNA-binding transcriptional regulator SutR	6	6	1	4	4681				536	536	536	81f6f292c45231c81cff920b572a826a_4834	d5a5a6aae91cabb186fe594057e8ea03_4965	ea50daa39c6c4a0574d509aa68b507b7_1682	4cb190364575d751463119e92857d019_4805	E_coli_7_01896	4840fb5d2d4897d217f65ba1ef1b22a7_5381
dnaJ		molecular chaperone DnaJ	6	6	1	4	454				1130	1130	1130	81f6f292c45231c81cff920b572a826a_7679	d5a5a6aae91cabb186fe594057e8ea03_8003	ea50daa39c6c4a0574d509aa68b507b7_4515	4cb190364575d751463119e92857d019_7605	E_coli_7_01086	4840fb5d2d4897d217f65ba1ef1b22a7_8251
uhpB		signal transduction histidine-protein kinase/phosphatase UhpB	6	6	1	4	5224				1502	1502	1502	81f6f292c45231c81cff920b572a826a_74	d5a5a6aae91cabb186fe594057e8ea03_74	ea50daa39c6c4a0574d509aa68b507b7_6254	4cb190364575d751463119e92857d019_74	E_coli_7_02915	4840fb5d2d4897d217f65ba1ef1b22a7_648
btuF		vitamin B12 ABC transporter substrate-binding protein BtuF	6	6	1	4	2567				800	800	800	81f6f292c45231c81cff920b572a826a_7390	d5a5a6aae91cabb186fe594057e8ea03_7707	ea50daa39c6c4a0574d509aa68b507b7_4288	4cb190364575d751463119e92857d019_7318	E_coli_7_01224	4840fb5d2d4897d217f65ba1ef1b22a7_7958
evgA		acid-sensing system DNA-binding response regulator EvgA	6	6	1	4	4056				614	614	614	81f6f292c45231c81cff920b572a826a_2788	d5a5a6aae91cabb186fe594057e8ea03_2887	ea50daa39c6c4a0574d509aa68b507b7_9045	4cb190364575d751463119e92857d019_2795	E_coli_7_00037	4840fb5d2d4897d217f65ba1ef1b22a7_3379
tcyJ		cystine ABC transporter substrate-binding protein	6	6	1	4	2825				800	857	809	81f6f292c45231c81cff920b572a826a_3851	d5a5a6aae91cabb186fe594057e8ea03_3909	ea50daa39c6c4a0574d509aa68b507b7_577	4cb190364575d751463119e92857d019_3688	E_coli_7_00466	4840fb5d2d4897d217f65ba1ef1b22a7_4290
leuD		3-isopropylmalate dehydratase small subunit	6	6	1	4	488				605	605	605	81f6f292c45231c81cff920b572a826a_7568	d5a5a6aae91cabb186fe594057e8ea03_7890	ea50daa39c6c4a0574d509aa68b507b7_4466	4cb190364575d751463119e92857d019_7496	E_coli_7_01141	4840fb5d2d4897d217f65ba1ef1b22a7_8136
glnP		glutamine ABC transporter permease GlnP	6	6	1	4	20				659	659	659	81f6f292c45231c81cff920b572a826a_6001	d5a5a6aae91cabb186fe594057e8ea03_6345	ea50daa39c6c4a0574d509aa68b507b7_2967	4cb190364575d751463119e92857d019_5975	E_coli_7_03312	4840fb5d2d4897d217f65ba1ef1b22a7_6562
nadA		quinolinate synthase NadA	6	6	1	4	67				1043	1043	1043	81f6f292c45231c81cff920b572a826a_6124	d5a5a6aae91cabb186fe594057e8ea03_6470	ea50daa39c6c4a0574d509aa68b507b7_3090	4cb190364575d751463119e92857d019_6098	E_coli_7_03252	4840fb5d2d4897d217f65ba1ef1b22a7_6689
potE		putrescine-ornithine antiporter	6	6	1	4	5334				1319	1319	1319	81f6f292c45231c81cff920b572a826a_6280	d5a5a6aae91cabb186fe594057e8ea03_6600	ea50daa39c6c4a0574d509aa68b507b7_3220	4cb190364575d751463119e92857d019_6254	E_coli_7_01276	4840fb5d2d4897d217f65ba1ef1b22a7_6814
fucO		lactaldehyde reductase	6	6	1	4	6282				1148	1148	1148	81f6f292c45231c81cff920b572a826a_1963	d5a5a6aae91cabb186fe594057e8ea03_2056	ea50daa39c6c4a0574d509aa68b507b7_8168	4cb190364575d751463119e92857d019_1968	E_coli_7_02764	4840fb5d2d4897d217f65ba1ef1b22a7_2502
yiaD		OmpA family lipoprotein	6	6	1	4	5093				659	659	659	81f6f292c45231c81cff920b572a826a_316	d5a5a6aae91cabb186fe594057e8ea03_323	ea50daa39c6c4a0574d509aa68b507b7_6505	4cb190364575d751463119e92857d019_314	E_coli_7_01867	4840fb5d2d4897d217f65ba1ef1b22a7_899
yggT		osmotic shock tolerance protein YggT	6	6	1	4	410				566	566	566	81f6f292c45231c81cff920b572a826a_1555	d5a5a6aae91cabb186fe594057e8ea03_1646	ea50daa39c6c4a0574d509aa68b507b7_7810	4cb190364575d751463119e92857d019_1569	E_coli_7_02529	4840fb5d2d4897d217f65ba1ef1b22a7_2112
ulaR		HTH-type transcriptional regulator UlaR	6	6	1	4	1621				755	755	755	81f6f292c45231c81cff920b572a826a_8220	d5a5a6aae91cabb186fe594057e8ea03_8429	ea50daa39c6c4a0574d509aa68b507b7_4997	4cb190364575d751463119e92857d019_8296	E_coli_7_02184	4840fb5d2d4897d217f65ba1ef1b22a7_8666
nanR		transcriptional regulator NanR	6	6	1	4	203				791	791	791	81f6f292c45231c81cff920b572a826a_977	d5a5a6aae91cabb186fe594057e8ea03_972	ea50daa39c6c4a0574d509aa68b507b7_7138	4cb190364575d751463119e92857d019_987	E_coli_7_03641	4840fb5d2d4897d217f65ba1ef1b22a7_1538
ygiW		OB fold stress tolerance protein YgiW	6	6	1	4	6004				392	392	392	81f6f292c45231c81cff920b572a826a_1386	d5a5a6aae91cabb186fe594057e8ea03_1477	ea50daa39c6c4a0574d509aa68b507b7_7543	4cb190364575d751463119e92857d019_1400	E_coli_7_03944	4840fb5d2d4897d217f65ba1ef1b22a7_1947
nudB		dihydroneopterin triphosphate diphosphatase	6	6	1	4	2877				452	509	461	81f6f292c45231c81cff920b572a826a_3964	d5a5a6aae91cabb186fe594057e8ea03_4024	ea50daa39c6c4a0574d509aa68b507b7_688	4cb190364575d751463119e92857d019_3801	E_coli_7_00518	4840fb5d2d4897d217f65ba1ef1b22a7_4407
yigI		thioesterase family protein	6	6	1	4	1153				467	467	467	81f6f292c45231c81cff920b572a826a_9052	d5a5a6aae91cabb186fe594057e8ea03_9485	ea50daa39c6c4a0574d509aa68b507b7_5891	4cb190364575d751463119e92857d019_9126	E_coli_7_04270	4840fb5d2d4897d217f65ba1ef1b22a7_313
eutL		ethanolamine utilization microcompartment protein EutL	6	6	1	4	3992				659	659	659	81f6f292c45231c81cff920b572a826a_2639	d5a5a6aae91cabb186fe594057e8ea03_2738	ea50daa39c6c4a0574d509aa68b507b7_8904	4cb190364575d751463119e92857d019_2643	E_coli_7_03534	4840fb5d2d4897d217f65ba1ef1b22a7_3230
sdhB		succinate dehydrogenase iron-sulfur subunit SdhB	6	6	1	4	48				716	716	716	81f6f292c45231c81cff920b572a826a_6186	d5a5a6aae91cabb186fe594057e8ea03_6532	ea50daa39c6c4a0574d509aa68b507b7_3152	4cb190364575d751463119e92857d019_6160	E_coli_7_03226	4840fb5d2d4897d217f65ba1ef1b22a7_6748
rssB		two-component system response regulator RssB	6	6	1	4	4505				1013	1013	1013	81f6f292c45231c81cff920b572a826a_5185	d5a5a6aae91cabb186fe594057e8ea03_5318	ea50daa39c6c4a0574d509aa68b507b7_2140	4cb190364575d751463119e92857d019_5158	E_coli_7_02064	4840fb5d2d4897d217f65ba1ef1b22a7_5732
mepH		peptidoglycan DD-endopeptidase MepH	6	6	1	4	3093				815	815	815	81f6f292c45231c81cff920b572a826a_4400	d5a5a6aae91cabb186fe594057e8ea03_4448	ea50daa39c6c4a0574d509aa68b507b7_1160	4cb190364575d751463119e92857d019_4241	E_coli_7_00747	4840fb5d2d4897d217f65ba1ef1b22a7_4851
WP_000716757.1		hypothetical protein	6	6	1	4	3728				317	317	317	81f6f292c45231c81cff920b572a826a_3335	d5a5a6aae91cabb186fe594057e8ea03_3406	ea50daa39c6c4a0574d509aa68b507b7_9558	4cb190364575d751463119e92857d019_3306	E_coli_7_00299	4840fb5d2d4897d217f65ba1ef1b22a7_3892
artQ		arginine ABC transporter permease ArtQ	6	6	1	4	3402				716	716	716	81f6f292c45231c81cff920b572a826a_5889	d5a5a6aae91cabb186fe594057e8ea03_6237	ea50daa39c6c4a0574d509aa68b507b7_2857	4cb190364575d751463119e92857d019_5863	E_coli_7_03182	4840fb5d2d4897d217f65ba1ef1b22a7_6454
WP_000409911.1		MGMT family protein	6	6	1	4	5573				311	311	311	81f6f292c45231c81cff920b572a826a_6686	d5a5a6aae91cabb186fe594057e8ea03_7047	ea50daa39c6c4a0574d509aa68b507b7_3654	4cb190364575d751463119e92857d019_6660	E_coli_7_01472	4840fb5d2d4897d217f65ba1ef1b22a7_7238
fbaB		class I fructose-bisphosphate aldolase	6	6	1	4	3737				1052	1052	1052	81f6f292c45231c81cff920b572a826a_3317	d5a5a6aae91cabb186fe594057e8ea03_3388	ea50daa39c6c4a0574d509aa68b507b7_9540	4cb190364575d751463119e92857d019_3288	E_coli_7_00290	4840fb5d2d4897d217f65ba1ef1b22a7_3874
pdxH		pyridoxamine 5'-phosphate oxidase	6	6	1	4	3110				656	656	656	81f6f292c45231c81cff920b572a826a_4434	d5a5a6aae91cabb186fe594057e8ea03_4482	ea50daa39c6c4a0574d509aa68b507b7_1194	4cb190364575d751463119e92857d019_4275	E_coli_7_00764	4840fb5d2d4897d217f65ba1ef1b22a7_4885
znuA		zinc ABC transporter substrate-binding protein ZnuA	6	6	1	4	2886				932	986	941	81f6f292c45231c81cff920b572a826a_3982	d5a5a6aae91cabb186fe594057e8ea03_4042	ea50daa39c6c4a0574d509aa68b507b7_706	4cb190364575d751463119e92857d019_3819	E_coli_7_00526	4840fb5d2d4897d217f65ba1ef1b22a7_4425
iprA		hydrogen peroxide resistance inhibitor IprA	6	6	1	4	5488				623	623	623	81f6f292c45231c81cff920b572a826a_6846	d5a5a6aae91cabb186fe594057e8ea03_7211	ea50daa39c6c4a0574d509aa68b507b7_3818	4cb190364575d751463119e92857d019_6818	E_coli_7_01551	4840fb5d2d4897d217f65ba1ef1b22a7_7402
yicC		YicC family protein	6	6	1	4	5247				863	863	863	81f6f292c45231c81cff920b572a826a_129	d5a5a6aae91cabb186fe594057e8ea03_125	ea50daa39c6c4a0574d509aa68b507b7_6307	4cb190364575d751463119e92857d019_127	E_coli_7_02889	4840fb5d2d4897d217f65ba1ef1b22a7_703
yadH		ABC transporter permease	6	6	1	4	2597				770	770	770	81f6f292c45231c81cff920b572a826a_7454	d5a5a6aae91cabb186fe594057e8ea03_7776	ea50daa39c6c4a0574d509aa68b507b7_4350	4cb190364575d751463119e92857d019_7382	E_coli_7_01194	4840fb5d2d4897d217f65ba1ef1b22a7_8022
citX		citrate lyase holo-[acyl-carrier protein] synthase	6	6	1	4	5399				551	551	551	81f6f292c45231c81cff920b572a826a_6429	d5a5a6aae91cabb186fe594057e8ea03_6749	ea50daa39c6c4a0574d509aa68b507b7_3369	4cb190364575d751463119e92857d019_6403	E_coli_7_01347	4840fb5d2d4897d217f65ba1ef1b22a7_6963
yjdM		zinc ribbon domain-containing protein YjdM	6	6	1	4	1538				335	335	335	81f6f292c45231c81cff920b572a826a_8396	d5a5a6aae91cabb186fe594057e8ea03_8768	ea50daa39c6c4a0574d509aa68b507b7_5173	4cb190364575d751463119e92857d019_8472	E_coli_7_02269	4840fb5d2d4897d217f65ba1ef1b22a7_8842
hemP		hemin uptake protein HemP	6	6	1	4	3044				191	191	191	81f6f292c45231c81cff920b572a826a_4291	d5a5a6aae91cabb186fe594057e8ea03_4339	ea50daa39c6c4a0574d509aa68b507b7_1053	4cb190364575d751463119e92857d019_4132	E_coli_7_00695	4840fb5d2d4897d217f65ba1ef1b22a7_4742
nuoB		NADH-quinone oxidoreductase subunit NuoB	6	6	1	4	4146				662	662	662	81f6f292c45231c81cff920b572a826a_2945	d5a5a6aae91cabb186fe594057e8ea03_3026	ea50daa39c6c4a0574d509aa68b507b7_9184	4cb190364575d751463119e92857d019_2934	E_coli_7_00114	4840fb5d2d4897d217f65ba1ef1b22a7_3518
fabY		fatty acid biosynthesis protein FabY	6	6	1	4	2082				941	941	941	81f6f292c45231c81cff920b572a826a_8911	d5a5a6aae91cabb186fe594057e8ea03_9350	ea50daa39c6c4a0574d509aa68b507b7_5754	4cb190364575d751463119e92857d019_8985	E_coli_7_04005	4840fb5d2d4897d217f65ba1ef1b22a7_174
ribF		bifunctional riboflavin kinase/FAD synthetase	6	6	1	4	447				941	941	941	81f6f292c45231c81cff920b572a826a_7661	d5a5a6aae91cabb186fe594057e8ea03_7981	ea50daa39c6c4a0574d509aa68b507b7_4539	4cb190364575d751463119e92857d019_7587	E_coli_7_01095	4840fb5d2d4897d217f65ba1ef1b22a7_8233
yjfL		DUF350 domain-containing protein	6	6	1	4	1614				398	398	398	81f6f292c45231c81cff920b572a826a_8234	d5a5a6aae91cabb186fe594057e8ea03_8443	ea50daa39c6c4a0574d509aa68b507b7_5011	4cb190364575d751463119e92857d019_8310	E_coli_7_02191	4840fb5d2d4897d217f65ba1ef1b22a7_8680
yebW		YebW family protein	6	6	1	4	2907				191	275	205	81f6f292c45231c81cff920b572a826a_4022	d5a5a6aae91cabb186fe594057e8ea03_4082	ea50daa39c6c4a0574d509aa68b507b7_776	4cb190364575d751463119e92857d019_3859	E_coli_7_00564	4840fb5d2d4897d217f65ba1ef1b22a7_4465
apbC		iron-sulfur cluster carrier protein ApbC	6	6	1	4	3753				1109	1109	1109	81f6f292c45231c81cff920b572a826a_3284	d5a5a6aae91cabb186fe594057e8ea03_3355	ea50daa39c6c4a0574d509aa68b507b7_9507	4cb190364575d751463119e92857d019_3255	E_coli_7_00274	4840fb5d2d4897d217f65ba1ef1b22a7_3841
aaeX		p-hydroxybenzoic acid efflux pump operon protein AaeX	6	6	1	4	187				203	203	203	81f6f292c45231c81cff920b572a826a_945	d5a5a6aae91cabb186fe594057e8ea03_940	ea50daa39c6c4a0574d509aa68b507b7_7106	4cb190364575d751463119e92857d019_955	E_coli_7_03657	4840fb5d2d4897d217f65ba1ef1b22a7_1506
dppD		dipeptide ABC transporter ATP-binding protein	6	6	1	4	5082				983	983	983	81f6f292c45231c81cff920b572a826a_342	d5a5a6aae91cabb186fe594057e8ea03_349	ea50daa39c6c4a0574d509aa68b507b7_6531	4cb190364575d751463119e92857d019_340	E_coli_7_01851	4840fb5d2d4897d217f65ba1ef1b22a7_925
agaC		PTS galactosamine transporter subunit IIC	6	6	1	4	284				803	803	803	81f6f292c45231c81cff920b572a826a_1145	d5a5a6aae91cabb186fe594057e8ea03_1138	ea50daa39c6c4a0574d509aa68b507b7_7304	4cb190364575d751463119e92857d019_1155	E_coli_7_03560	4840fb5d2d4897d217f65ba1ef1b22a7_1704
tpiA		triose-phosphate isomerase	6	6	1	4	6051				767	767	767	81f6f292c45231c81cff920b572a826a_8845	d5a5a6aae91cabb186fe594057e8ea03_9284	ea50daa39c6c4a0574d509aa68b507b7_5686	4cb190364575d751463119e92857d019_8919	E_coli_7_04042	4840fb5d2d4897d217f65ba1ef1b22a7_108
etk		tyrosine-protein kinase	6	6	1	4	3521				2180	2180	2180	81f6f292c45231c81cff920b572a826a_5645	d5a5a6aae91cabb186fe594057e8ea03_5993	ea50daa39c6c4a0574d509aa68b507b7_2615	4cb190364575d751463119e92857d019_5619	E_coli_7_03062	4840fb5d2d4897d217f65ba1ef1b22a7_6210
yecH		YecH family protein	6	6	1	4	2837				239	239	239	81f6f292c45231c81cff920b572a826a_3884	d5a5a6aae91cabb186fe594057e8ea03_3942	ea50daa39c6c4a0574d509aa68b507b7_610	4cb190364575d751463119e92857d019_3721	E_coli_7_00480	4840fb5d2d4897d217f65ba1ef1b22a7_4323
ybdZ		enterobactin biosynthesis protein YbdZ	6	6	1	4	5429				218	218	218	81f6f292c45231c81cff920b572a826a_6487	d5a5a6aae91cabb186fe594057e8ea03_6807	ea50daa39c6c4a0574d509aa68b507b7_3427	4cb190364575d751463119e92857d019_6461	E_coli_7_01377	4840fb5d2d4897d217f65ba1ef1b22a7_7021
hfq		RNA chaperone Hfq	6	6	1	4	1602				308	308	308	81f6f292c45231c81cff920b572a826a_8258	d5a5a6aae91cabb186fe594057e8ea03_8467	ea50daa39c6c4a0574d509aa68b507b7_5035	4cb190364575d751463119e92857d019_8334	E_coli_7_02203	4840fb5d2d4897d217f65ba1ef1b22a7_8704
exoX		exodeoxyribonuclease X	6	6	1	4	2900				662	662	662	81f6f292c45231c81cff920b572a826a_4008	d5a5a6aae91cabb186fe594057e8ea03_4068	ea50daa39c6c4a0574d509aa68b507b7_762	4cb190364575d751463119e92857d019_3845	E_coli_7_00557	4840fb5d2d4897d217f65ba1ef1b22a7_4451
msrC		L-methionine (R)-S-oxide reductase	6	6	1	4	2912				497	551	506	81f6f292c45231c81cff920b572a826a_4032	d5a5a6aae91cabb186fe594057e8ea03_4092	ea50daa39c6c4a0574d509aa68b507b7_786	4cb190364575d751463119e92857d019_3869	E_coli_7_00569	4840fb5d2d4897d217f65ba1ef1b22a7_4475
group_3280	ghoS	type V toxin-antitoxin system endoribonuclease antitoxin GhoS	6	6	1	4	3024				290	290	290	81f6f292c45231c81cff920b572a826a_4252	d5a5a6aae91cabb186fe594057e8ea03_4300	ea50daa39c6c4a0574d509aa68b507b7_1014	4cb190364575d751463119e92857d019_4093	E_coli_7_00676	4840fb5d2d4897d217f65ba1ef1b22a7_4703
ompR		two-component system response regulator OmpR	6	6	1	4	4933				719	719	719	81f6f292c45231c81cff920b572a826a_620	d5a5a6aae91cabb186fe594057e8ea03_639	ea50daa39c6c4a0574d509aa68b507b7_6815	4cb190364575d751463119e92857d019_630	E_coli_7_01708	4840fb5d2d4897d217f65ba1ef1b22a7_1215
kbl		glycine C-acetyltransferase	6	6	1	4	5275				1196	1196	1196	81f6f292c45231c81cff920b572a826a_177	d5a5a6aae91cabb186fe594057e8ea03_173	ea50daa39c6c4a0574d509aa68b507b7_6355	4cb190364575d751463119e92857d019_175	E_coli_7_02865	4840fb5d2d4897d217f65ba1ef1b22a7_751
yfaZ		YfaZ family outer membrane protein	6	6	1	4	4179				542	542	542	81f6f292c45231c81cff920b572a826a_3013	d5a5a6aae91cabb186fe594057e8ea03_3096	ea50daa39c6c4a0574d509aa68b507b7_9252	4cb190364575d751463119e92857d019_3002	E_coli_7_00147	4840fb5d2d4897d217f65ba1ef1b22a7_3586
waaA		lipid IV(A) 3-deoxy-D-manno-octulosonic acid transferase	6	6	1	4	5258				1277	1277	1277	81f6f292c45231c81cff920b572a826a_151	d5a5a6aae91cabb186fe594057e8ea03_147	ea50daa39c6c4a0574d509aa68b507b7_6329	4cb190364575d751463119e92857d019_149	E_coli_7_02878	4840fb5d2d4897d217f65ba1ef1b22a7_725
uspE		universal stress protein UspE	6	6	1	4	4615				950	950	950	81f6f292c45231c81cff920b572a826a_4968	d5a5a6aae91cabb186fe594057e8ea03_5099	ea50daa39c6c4a0574d509aa68b507b7_1812	4cb190364575d751463119e92857d019_4939	E_coli_7_01961	4840fb5d2d4897d217f65ba1ef1b22a7_5515
dnaB		replicative DNA helicase	6	6	1	4	1485				1415	1415	1415	81f6f292c45231c81cff920b572a826a_8500	d5a5a6aae91cabb186fe594057e8ea03_8870	ea50daa39c6c4a0574d509aa68b507b7_5275	4cb190364575d751463119e92857d019_8576	E_coli_7_02321	4840fb5d2d4897d217f65ba1ef1b22a7_8946
luxS		S-ribosylhomocysteine lyase	6	6	1	4	1096				515	515	515	81f6f292c45231c81cff920b572a826a_2202	d5a5a6aae91cabb186fe594057e8ea03_2303	ea50daa39c6c4a0574d509aa68b507b7_8411	4cb190364575d751463119e92857d019_2203	E_coli_7_02647	4840fb5d2d4897d217f65ba1ef1b22a7_2741
ydgC		GlpM family protein	6	6	1	4	3142				335	335	335	81f6f292c45231c81cff920b572a826a_4498	d5a5a6aae91cabb186fe594057e8ea03_4546	ea50daa39c6c4a0574d509aa68b507b7_1258	4cb190364575d751463119e92857d019_4339	E_coli_7_00796	4840fb5d2d4897d217f65ba1ef1b22a7_4949
tatC		Sec-independent protein translocase subunit TatC	6	6	1	4	1135				776	776	776	81f6f292c45231c81cff920b572a826a_9016	d5a5a6aae91cabb186fe594057e8ea03_9449	ea50daa39c6c4a0574d509aa68b507b7_5855	4cb190364575d751463119e92857d019_9090	E_coli_7_04288	4840fb5d2d4897d217f65ba1ef1b22a7_277
manZ		PTS mannose transporter subunit IID	6	6	1	4	2926				851	851	851	81f6f292c45231c81cff920b572a826a_4060	d5a5a6aae91cabb186fe594057e8ea03_4120	ea50daa39c6c4a0574d509aa68b507b7_814	4cb190364575d751463119e92857d019_3897	E_coli_7_00581	4840fb5d2d4897d217f65ba1ef1b22a7_4503
yjeI		DUF4156 domain-containing protein	6	6	1	4	1576				353	353	353	81f6f292c45231c81cff920b572a826a_8319	d5a5a6aae91cabb186fe594057e8ea03_8534	ea50daa39c6c4a0574d509aa68b507b7_5096	4cb190364575d751463119e92857d019_8395	E_coli_7_02231	4840fb5d2d4897d217f65ba1ef1b22a7_8765
ecnB		lipoprotein toxin entericidin B	6	6	1	4	1581				146	146	146	81f6f292c45231c81cff920b572a826a_8309	d5a5a6aae91cabb186fe594057e8ea03_8522	ea50daa39c6c4a0574d509aa68b507b7_5086	4cb190364575d751463119e92857d019_8385	E_coli_7_02226	4840fb5d2d4897d217f65ba1ef1b22a7_8755
hns		DNA-binding transcriptional regulator H-NS	6	6	1	4	4507				413	413	413	81f6f292c45231c81cff920b572a826a_5181	d5a5a6aae91cabb186fe594057e8ea03_5314	ea50daa39c6c4a0574d509aa68b507b7_2136	4cb190364575d751463119e92857d019_5154	E_coli_7_02062	4840fb5d2d4897d217f65ba1ef1b22a7_5728
stpA		DNA-binding protein StpA	6	6	1	4	1108				404	404	404	81f6f292c45231c81cff920b572a826a_2236	d5a5a6aae91cabb186fe594057e8ea03_2337	ea50daa39c6c4a0574d509aa68b507b7_8473	4cb190364575d751463119e92857d019_2237	E_coli_7_02630	4840fb5d2d4897d217f65ba1ef1b22a7_2775
ycaP		DUF421 domain-containing protein	6	6	1	4	3446				692	692	692	81f6f292c45231c81cff920b572a826a_5798	d5a5a6aae91cabb186fe594057e8ea03_6146	ea50daa39c6c4a0574d509aa68b507b7_2768	4cb190364575d751463119e92857d019_5772	E_coli_7_03138	4840fb5d2d4897d217f65ba1ef1b22a7_6363
group_3295	lysS	lysine--tRNA ligase	6	6	1	4	6161				1517	1517	1517	81f6f292c45231c81cff920b572a826a_1697	d5a5a6aae91cabb186fe594057e8ea03_1788	ea50daa39c6c4a0574d509aa68b507b7_7952	4cb190364575d751463119e92857d019_1709	E_coli_7_02464	4840fb5d2d4897d217f65ba1ef1b22a7_2250
atpB		F0F1 ATP synthase subunit A	6	6	1	4	1211				815	815	815	81f6f292c45231c81cff920b572a826a_9226	d5a5a6aae91cabb186fe594057e8ea03_9661	ea50daa39c6c4a0574d509aa68b507b7_6101	4cb190364575d751463119e92857d019_9300	E_coli_7_02988	4840fb5d2d4897d217f65ba1ef1b22a7_495
tolC		outer membrane channel protein TolC	6	6	1	4	5993				1481	1481	1481	81f6f292c45231c81cff920b572a826a_1364	d5a5a6aae91cabb186fe594057e8ea03_1455	ea50daa39c6c4a0574d509aa68b507b7_7521	4cb190364575d751463119e92857d019_1378	E_coli_7_03934	4840fb5d2d4897d217f65ba1ef1b22a7_1925
flhC		flagellar transcriptional regulator FlhC	6	6	1	4	2850				578	578	578	81f6f292c45231c81cff920b572a826a_3910	d5a5a6aae91cabb186fe594057e8ea03_3970	ea50daa39c6c4a0574d509aa68b507b7_636	4cb190364575d751463119e92857d019_3747	E_coli_7_00492	4840fb5d2d4897d217f65ba1ef1b22a7_4349
ylaC		YlaC family protein	6	6	1	4	5576				470	470	470	81f6f292c45231c81cff920b572a826a_6677	d5a5a6aae91cabb186fe594057e8ea03_7038	ea50daa39c6c4a0574d509aa68b507b7_3645	4cb190364575d751463119e92857d019_6651	E_coli_7_01469	4840fb5d2d4897d217f65ba1ef1b22a7_7229
fadD		long-chain-fatty-acid--CoA ligase FadD	6	6	1	4	2940				1685	1751	1696	81f6f292c45231c81cff920b572a826a_4088	d5a5a6aae91cabb186fe594057e8ea03_4148	ea50daa39c6c4a0574d509aa68b507b7_842	4cb190364575d751463119e92857d019_3925	E_coli_7_00596	4840fb5d2d4897d217f65ba1ef1b22a7_4531
yfeK		YfeK family protein	6	6	1	4	4011				368	368	368	81f6f292c45231c81cff920b572a826a_2677	d5a5a6aae91cabb186fe594057e8ea03_2776	ea50daa39c6c4a0574d509aa68b507b7_8942	4cb190364575d751463119e92857d019_2681	E_coli_7_04545	4840fb5d2d4897d217f65ba1ef1b22a7_3268
nfuA		Fe-S biogenesis protein NfuA	6	6	1	4	4941				575	575	575	81f6f292c45231c81cff920b572a826a_602	d5a5a6aae91cabb186fe594057e8ea03_621	ea50daa39c6c4a0574d509aa68b507b7_6797	4cb190364575d751463119e92857d019_612	E_coli_7_01718	4840fb5d2d4897d217f65ba1ef1b22a7_1197
acrA		multidrug efflux RND transporter periplasmic adaptor subunit AcrA	6	6	1	4	5581				1193	1193	1193	81f6f292c45231c81cff920b572a826a_6667	d5a5a6aae91cabb186fe594057e8ea03_7028	ea50daa39c6c4a0574d509aa68b507b7_3635	4cb190364575d751463119e92857d019_6641	E_coli_7_01464	4840fb5d2d4897d217f65ba1ef1b22a7_7219
ispB		octaprenyl diphosphate synthase	6	6	1	4	237				971	971	971	81f6f292c45231c81cff920b572a826a_1045	d5a5a6aae91cabb186fe594057e8ea03_1038	ea50daa39c6c4a0574d509aa68b507b7_7204	4cb190364575d751463119e92857d019_1055	E_coli_7_03608	4840fb5d2d4897d217f65ba1ef1b22a7_1604
lysP		lysine-specific permease	6	6	1	4	4264				1469	1469	1469	81f6f292c45231c81cff920b572a826a_3198	d5a5a6aae91cabb186fe594057e8ea03_3267	ea50daa39c6c4a0574d509aa68b507b7_9421	4cb190364575d751463119e92857d019_3171	E_coli_7_00231	4840fb5d2d4897d217f65ba1ef1b22a7_3757
ansB		L-asparaginase 2	6	6	1	4	402				1046	1046	1046	81f6f292c45231c81cff920b572a826a_1539	d5a5a6aae91cabb186fe594057e8ea03_1636	ea50daa39c6c4a0574d509aa68b507b7_7800	4cb190364575d751463119e92857d019_1559	E_coli_7_02537	4840fb5d2d4897d217f65ba1ef1b22a7_2102
rsmE		16S rRNA (uracil(1498)-N(3))-methyltransferase	6	6	1	4	527				731	731	731	81f6f292c45231c81cff920b572a826a_1567	d5a5a6aae91cabb186fe594057e8ea03_1660	ea50daa39c6c4a0574d509aa68b507b7_7822	4cb190364575d751463119e92857d019_1581	E_coli_7_02523	4840fb5d2d4897d217f65ba1ef1b22a7_2124
atpF		F0F1 ATP synthase subunit B	6	6	1	4	5149				470	470	470	81f6f292c45231c81cff920b572a826a_9230	d5a5a6aae91cabb186fe594057e8ea03_9665	ea50daa39c6c4a0574d509aa68b507b7_6105	4cb190364575d751463119e92857d019_9304	E_coli_7_02986	4840fb5d2d4897d217f65ba1ef1b22a7_499
rpiA		ribose-5-phosphate isomerase RpiA	6	6	1	4	6134				659	659	659	81f6f292c45231c81cff920b572a826a_1641	d5a5a6aae91cabb186fe594057e8ea03_1732	ea50daa39c6c4a0574d509aa68b507b7_7896	4cb190364575d751463119e92857d019_1653	E_coli_7_02487	4840fb5d2d4897d217f65ba1ef1b22a7_2194
dsbA		thiol:disulfide interchange protein DsbA	6	6	1	4	2092				626	626	626	81f6f292c45231c81cff920b572a826a_8971	d5a5a6aae91cabb186fe594057e8ea03_9404	ea50daa39c6c4a0574d509aa68b507b7_5810	4cb190364575d751463119e92857d019_9045	E_coli_7_03978	4840fb5d2d4897d217f65ba1ef1b22a7_232
yoaF		DUF333 domain-containing lipoprotein YoaF	6	6	1	4	2954				254	254	254	81f6f292c45231c81cff920b572a826a_4116	d5a5a6aae91cabb186fe594057e8ea03_4176	ea50daa39c6c4a0574d509aa68b507b7_874	4cb190364575d751463119e92857d019_3953	E_coli_7_00608	4840fb5d2d4897d217f65ba1ef1b22a7_4563
tdcG		L-serine ammonia-lyase	6	6	1	4	5911				1364	1364	1364	81f6f292c45231c81cff920b572a826a_1202	d5a5a6aae91cabb186fe594057e8ea03_1197	ea50daa39c6c4a0574d509aa68b507b7_7361	4cb190364575d751463119e92857d019_1214	E_coli_7_03858	4840fb5d2d4897d217f65ba1ef1b22a7_1763
dut		dUTP diphosphatase	6	6	1	4	5251				458	458	458	81f6f292c45231c81cff920b572a826a_137	d5a5a6aae91cabb186fe594057e8ea03_133	ea50daa39c6c4a0574d509aa68b507b7_6315	4cb190364575d751463119e92857d019_135	E_coli_7_02885	4840fb5d2d4897d217f65ba1ef1b22a7_711
WP_000043127.1		FliM/FliN family flagellar motor switch protein	6	6	1	4	5767				371	371	371	81f6f292c45231c81cff920b572a826a_7169	d5a5a6aae91cabb186fe594057e8ea03_7490	ea50daa39c6c4a0574d509aa68b507b7_4063	4cb190364575d751463119e92857d019_7101	E_coli_7_04190	4840fb5d2d4897d217f65ba1ef1b22a7_7737
hcaC		bifunctional 3-phenylpropionate/cinnamic acid dioxygenase ferredoxin subunit	6	6	1	4	3875				320	320	320	81f6f292c45231c81cff920b572a826a_2443	d5a5a6aae91cabb186fe594057e8ea03_2544	ea50daa39c6c4a0574d509aa68b507b7_8676	4cb190364575d751463119e92857d019_2447	E_coli_7_03434	4840fb5d2d4897d217f65ba1ef1b22a7_3002
eutN		ethanolamine utilization microcompartment protein EutN	6	6	1	4	3979				287	287	287	81f6f292c45231c81cff920b572a826a_2623	d5a5a6aae91cabb186fe594057e8ea03_2722	ea50daa39c6c4a0574d509aa68b507b7_8854	4cb190364575d751463119e92857d019_2627	E_coli_7_03526	4840fb5d2d4897d217f65ba1ef1b22a7_3214
glnQ		glutamine ABC transporter ATP-binding protein GlnQ	6	6	1	4	21				722	722	722	81f6f292c45231c81cff920b572a826a_6003	d5a5a6aae91cabb186fe594057e8ea03_6347	ea50daa39c6c4a0574d509aa68b507b7_2969	4cb190364575d751463119e92857d019_5977	E_coli_7_03311	4840fb5d2d4897d217f65ba1ef1b22a7_6564
msyB		acidic protein MsyB	6	6	1	4	4342				374	374	374	81f6f292c45231c81cff920b572a826a_5519	d5a5a6aae91cabb186fe594057e8ea03_5770	ea50daa39c6c4a0574d509aa68b507b7_2477	4cb190364575d751463119e92857d019_5496	E_coli_7_03848	4840fb5d2d4897d217f65ba1ef1b22a7_6064
yfbU		YfbU family protein	6	6	1	4	4138				494	494	494	81f6f292c45231c81cff920b572a826a_2931	d5a5a6aae91cabb186fe594057e8ea03_3012	ea50daa39c6c4a0574d509aa68b507b7_9170	4cb190364575d751463119e92857d019_2920	E_coli_7_00106	4840fb5d2d4897d217f65ba1ef1b22a7_3504
dcd		dCTP deaminase	6	6	1	4	3707				581	581	581	81f6f292c45231c81cff920b572a826a_3457	d5a5a6aae91cabb186fe594057e8ea03_3452	ea50daa39c6c4a0574d509aa68b507b7_109	4cb190364575d751463119e92857d019_3430	E_coli_7_00316	4840fb5d2d4897d217f65ba1ef1b22a7_4018
apaG		Co2+/Mg2+ efflux protein ApaG	6	6	1	4	6083				377	377	377	81f6f292c45231c81cff920b572a826a_7611	d5a5a6aae91cabb186fe594057e8ea03_7931	ea50daa39c6c4a0574d509aa68b507b7_4595	4cb190364575d751463119e92857d019_7537	E_coli_7_01121	4840fb5d2d4897d217f65ba1ef1b22a7_8177
yeaO		DUF488 domain-containing protein	6	6	1	4	2955				347	347	347	81f6f292c45231c81cff920b572a826a_4118	d5a5a6aae91cabb186fe594057e8ea03_4178	ea50daa39c6c4a0574d509aa68b507b7_876	4cb190364575d751463119e92857d019_3955	E_coli_7_00609	4840fb5d2d4897d217f65ba1ef1b22a7_4565
ruvB		Holliday junction branch migration DNA helicase RuvB	6	6	1	4	2883				1010	1010	1010	81f6f292c45231c81cff920b572a826a_3976	d5a5a6aae91cabb186fe594057e8ea03_4036	ea50daa39c6c4a0574d509aa68b507b7_700	4cb190364575d751463119e92857d019_3813	E_coli_7_00523	4840fb5d2d4897d217f65ba1ef1b22a7_4419
frdD		fumarate reductase subunit FrdD	6	6	1	4	1585				359	359	359	81f6f292c45231c81cff920b572a826a_8301	d5a5a6aae91cabb186fe594057e8ea03_8514	ea50daa39c6c4a0574d509aa68b507b7_5078	4cb190364575d751463119e92857d019_8377	E_coli_7_02222	4840fb5d2d4897d217f65ba1ef1b22a7_8747
ybjD		ATP-dependent endonuclease	6	6	1	4	3416				1658	1658	1658	81f6f292c45231c81cff920b572a826a_5861	d5a5a6aae91cabb186fe594057e8ea03_6209	ea50daa39c6c4a0574d509aa68b507b7_2829	4cb190364575d751463119e92857d019_5835	E_coli_7_03168	4840fb5d2d4897d217f65ba1ef1b22a7_6426
ptsN		PTS IIA-like nitrogen regulatory protein PtsN	6	6	1	4	220				491	491	491	81f6f292c45231c81cff920b572a826a_1011	d5a5a6aae91cabb186fe594057e8ea03_1004	ea50daa39c6c4a0574d509aa68b507b7_7170	4cb190364575d751463119e92857d019_1021	E_coli_7_03625	4840fb5d2d4897d217f65ba1ef1b22a7_1570
yciB		septation protein A	6	6	1	4	4526				539	539	539	81f6f292c45231c81cff920b572a826a_5147	d5a5a6aae91cabb186fe594057e8ea03_5278	ea50daa39c6c4a0574d509aa68b507b7_2102	4cb190364575d751463119e92857d019_5118	E_coli_7_02045	4840fb5d2d4897d217f65ba1ef1b22a7_5690
hlyD		secretion protein HlyD	6	6	1	4	113				995	995	995	81f6f292c45231c81cff920b572a826a_6033	d5a5a6aae91cabb186fe594057e8ea03_6377	ea50daa39c6c4a0574d509aa68b507b7_2997	4cb190364575d751463119e92857d019_6007	E_coli_7_03297	4840fb5d2d4897d217f65ba1ef1b22a7_6596
yjfN		DUF1471 family protease activator YjfN	6	6	1	4	1618				275	275	275	81f6f292c45231c81cff920b572a826a_8226	d5a5a6aae91cabb186fe594057e8ea03_8435	ea50daa39c6c4a0574d509aa68b507b7_5003	4cb190364575d751463119e92857d019_8302	E_coli_7_02187	4840fb5d2d4897d217f65ba1ef1b22a7_8672
glyQ		glycine--tRNA ligase subunit alpha	6	6	1	4	5101				911	911	911	81f6f292c45231c81cff920b572a826a_299	d5a5a6aae91cabb186fe594057e8ea03_307	ea50daa39c6c4a0574d509aa68b507b7_6491	4cb190364575d751463119e92857d019_297	E_coli_7_02805	4840fb5d2d4897d217f65ba1ef1b22a7_883
ltaE		low-specificity L-threonine aldolase	6	6	1	4	3410				1001	1001	1001	81f6f292c45231c81cff920b572a826a_5873	d5a5a6aae91cabb186fe594057e8ea03_6221	ea50daa39c6c4a0574d509aa68b507b7_2841	4cb190364575d751463119e92857d019_5847	E_coli_7_03174	4840fb5d2d4897d217f65ba1ef1b22a7_6438
uxaB		tagaturonate reductase	6	6	1	4	3225				1451	1451	1451	81f6f292c45231c81cff920b572a826a_4618	d5a5a6aae91cabb186fe594057e8ea03_4771	ea50daa39c6c4a0574d509aa68b507b7_1490	4cb190364575d751463119e92857d019_4581	E_coli_7_00853	4840fb5d2d4897d217f65ba1ef1b22a7_5185
topB		DNA topoisomerase III	6	6	1	4	2984				1946	1961	1958	81f6f292c45231c81cff920b572a826a_4176	d5a5a6aae91cabb186fe594057e8ea03_4220	ea50daa39c6c4a0574d509aa68b507b7_934	4cb190364575d751463119e92857d019_4013	E_coli_7_00637	4840fb5d2d4897d217f65ba1ef1b22a7_4623
rpoZ		DNA-directed RNA polymerase subunit omega	6	6	1	4	5242				275	275	275	81f6f292c45231c81cff920b572a826a_119	d5a5a6aae91cabb186fe594057e8ea03_115	ea50daa39c6c4a0574d509aa68b507b7_6297	4cb190364575d751463119e92857d019_117	E_coli_7_02894	4840fb5d2d4897d217f65ba1ef1b22a7_693
ppc		phosphoenolpyruvate carboxylase	6	6	1	4	691				2651	2651	2651	81f6f292c45231c81cff920b572a826a_8767	d5a5a6aae91cabb186fe594057e8ea03_9206	ea50daa39c6c4a0574d509aa68b507b7_5608	4cb190364575d751463119e92857d019_8841	E_coli_7_04078	4840fb5d2d4897d217f65ba1ef1b22a7_30
yejL		YejL family protein	6	6	1	4	4232				227	227	227	81f6f292c45231c81cff920b572a826a_3134	d5a5a6aae91cabb186fe594057e8ea03_3203	ea50daa39c6c4a0574d509aa68b507b7_9357	4cb190364575d751463119e92857d019_3107	E_coli_7_00199	4840fb5d2d4897d217f65ba1ef1b22a7_3693
yfcE		phosphodiesterase	6	6	1	4	4132				551	551	551	81f6f292c45231c81cff920b572a826a_2919	d5a5a6aae91cabb186fe594057e8ea03_3000	ea50daa39c6c4a0574d509aa68b507b7_9158	4cb190364575d751463119e92857d019_2908	E_coli_7_00100	4840fb5d2d4897d217f65ba1ef1b22a7_3492
gfcE		polysaccharide export protein	6	6	1	4	3523				1139	1139	1139	81f6f292c45231c81cff920b572a826a_5641	d5a5a6aae91cabb186fe594057e8ea03_5989	ea50daa39c6c4a0574d509aa68b507b7_2611	4cb190364575d751463119e92857d019_5615	E_coli_7_03060	4840fb5d2d4897d217f65ba1ef1b22a7_6206
lepA		translation elongation factor 4	6	6	1	4	3845				1799	1799	1799	81f6f292c45231c81cff920b572a826a_2383	d5a5a6aae91cabb186fe594057e8ea03_2484	ea50daa39c6c4a0574d509aa68b507b7_8616	4cb190364575d751463119e92857d019_2387	E_coli_7_03405	4840fb5d2d4897d217f65ba1ef1b22a7_2942
mreB		rod shape-determining protein MreB	6	6	1	4	179				1043	1043	1043	81f6f292c45231c81cff920b572a826a_929	d5a5a6aae91cabb186fe594057e8ea03_924	ea50daa39c6c4a0574d509aa68b507b7_7090	4cb190364575d751463119e92857d019_939	E_coli_7_03665	4840fb5d2d4897d217f65ba1ef1b22a7_1490
yeiS		DUF2542 family protein	6	6	1	4	4275				239	239	239	81f6f292c45231c81cff920b572a826a_3220	d5a5a6aae91cabb186fe594057e8ea03_3289	ea50daa39c6c4a0574d509aa68b507b7_9443	4cb190364575d751463119e92857d019_3193	E_coli_7_00242	4840fb5d2d4897d217f65ba1ef1b22a7_3779
yqjK		YqjK-like family protein	6	6	1	4	5921				299	299	299	81f6f292c45231c81cff920b572a826a_1222	d5a5a6aae91cabb186fe594057e8ea03_1217	ea50daa39c6c4a0574d509aa68b507b7_7381	4cb190364575d751463119e92857d019_1234	E_coli_7_03868	4840fb5d2d4897d217f65ba1ef1b22a7_1783
acpS		holo-ACP synthase	6	6	1	4	3851				380	380	380	81f6f292c45231c81cff920b572a826a_2395	d5a5a6aae91cabb186fe594057e8ea03_2496	ea50daa39c6c4a0574d509aa68b507b7_8628	4cb190364575d751463119e92857d019_2399	E_coli_7_03411	4840fb5d2d4897d217f65ba1ef1b22a7_2954
ynjH		YnjH family protein	6	6	1	4	2987			Hypothetical protein with no hits to refseq/uniprot/clusters/cdd/tigrfams/pfam overlapping another protein with hits	272	272	272	81f6f292c45231c81cff920b572a826a_4182	d5a5a6aae91cabb186fe594057e8ea03_4226	ea50daa39c6c4a0574d509aa68b507b7_940	4cb190364575d751463119e92857d019_4021	E_coli_7_00640	4840fb5d2d4897d217f65ba1ef1b22a7_4629
mrdB		peptidoglycan glycosyltransferase MrdB	6	6	1	4	5380				1112	1112	1112	81f6f292c45231c81cff920b572a826a_6391	d5a5a6aae91cabb186fe594057e8ea03_6711	ea50daa39c6c4a0574d509aa68b507b7_3331	4cb190364575d751463119e92857d019_6365	E_coli_7_01328	4840fb5d2d4897d217f65ba1ef1b22a7_6925
dapF		diaminopimelate epimerase	6	6	1	4	1170				824	824	824	81f6f292c45231c81cff920b572a826a_9074	d5a5a6aae91cabb186fe594057e8ea03_9511	ea50daa39c6c4a0574d509aa68b507b7_5915	4cb190364575d751463119e92857d019_9148	E_coli_7_04260	4840fb5d2d4897d217f65ba1ef1b22a7_339
aspC		aspartate transaminase	6	6	1	4	3468				1190	1190	1190	81f6f292c45231c81cff920b572a826a_5754	d5a5a6aae91cabb186fe594057e8ea03_6102	ea50daa39c6c4a0574d509aa68b507b7_2724	4cb190364575d751463119e92857d019_5728	E_coli_7_03116	4840fb5d2d4897d217f65ba1ef1b22a7_6319
qseB		two-component system response regulator QseB	6	6	1	4	6003				659	659	659	81f6f292c45231c81cff920b572a826a_1384	d5a5a6aae91cabb186fe594057e8ea03_1475	ea50daa39c6c4a0574d509aa68b507b7_7541	4cb190364575d751463119e92857d019_1398	E_coli_7_03943	4840fb5d2d4897d217f65ba1ef1b22a7_1945
tatB		Sec-independent protein translocase protein TatB	6	6	1	4	1136				515	515	515	81f6f292c45231c81cff920b572a826a_9018	d5a5a6aae91cabb186fe594057e8ea03_9451	ea50daa39c6c4a0574d509aa68b507b7_5857	4cb190364575d751463119e92857d019_9092	E_coli_7_04287	4840fb5d2d4897d217f65ba1ef1b22a7_279
ygdQ		TerC family protein	6	6	1	4	6225				713	713	713	81f6f292c45231c81cff920b572a826a_1832	d5a5a6aae91cabb186fe594057e8ea03_1929	ea50daa39c6c4a0574d509aa68b507b7_8089	4cb190364575d751463119e92857d019_1844	E_coli_7_02394	4840fb5d2d4897d217f65ba1ef1b22a7_2385
yshB		YshB family small membrane protein	6	6	1	4	2099				110	110	110	81f6f292c45231c81cff920b572a826a_8955	d5a5a6aae91cabb186fe594057e8ea03_9390	ea50daa39c6c4a0574d509aa68b507b7_5796	4cb190364575d751463119e92857d019_9029	E_coli_7_03986	4840fb5d2d4897d217f65ba1ef1b22a7_216
ibpB		heat shock chaperone IbpB	6	6	1	4	5204				428	428	428	81f6f292c45231c81cff920b572a826a_36	d5a5a6aae91cabb186fe594057e8ea03_36	ea50daa39c6c4a0574d509aa68b507b7_6218	4cb190364575d751463119e92857d019_36	E_coli_7_02933	4840fb5d2d4897d217f65ba1ef1b22a7_610
fkpA		FKBP-type peptidyl-prolyl cis-trans isomerase	6	6	1	4	4877				812	812	812	81f6f292c45231c81cff920b572a826a_730	d5a5a6aae91cabb186fe594057e8ea03_755	ea50daa39c6c4a0574d509aa68b507b7_6921	4cb190364575d751463119e92857d019_740	E_coli_7_01648	4840fb5d2d4897d217f65ba1ef1b22a7_1321
lexA		transcriptional repressor LexA	6	6	1	4	797				608	608	608	81f6f292c45231c81cff920b572a826a_8516	d5a5a6aae91cabb186fe594057e8ea03_9008	ea50daa39c6c4a0574d509aa68b507b7_5414	4cb190364575d751463119e92857d019_8592	E_coli_7_02330	4840fb5d2d4897d217f65ba1ef1b22a7_8962
nudG		CTP pyrophosphohydrolase	6	6	1	4	2988				407	407	407	81f6f292c45231c81cff920b572a826a_4184	d5a5a6aae91cabb186fe594057e8ea03_4228	ea50daa39c6c4a0574d509aa68b507b7_942	4cb190364575d751463119e92857d019_4023	E_coli_7_00641	4840fb5d2d4897d217f65ba1ef1b22a7_4631
gntT		gluconate transporter	6	6	1	4	4942				1316	1316	1316	81f6f292c45231c81cff920b572a826a_600	d5a5a6aae91cabb186fe594057e8ea03_619	ea50daa39c6c4a0574d509aa68b507b7_6795	4cb190364575d751463119e92857d019_610	E_coli_7_01719	4840fb5d2d4897d217f65ba1ef1b22a7_1195
creA		protein CreA	6	6	1	4	1439				473	473	473	81f6f292c45231c81cff920b572a826a_7720	d5a5a6aae91cabb186fe594057e8ea03_8046	ea50daa39c6c4a0574d509aa68b507b7_4632	4cb190364575d751463119e92857d019_7648	E_coli_7_01068	4840fb5d2d4897d217f65ba1ef1b22a7_8292
degQ		serine endoprotease DegQ	6	6	1	4	195				1367	1367	1367	81f6f292c45231c81cff920b572a826a_961	d5a5a6aae91cabb186fe594057e8ea03_956	ea50daa39c6c4a0574d509aa68b507b7_7122	4cb190364575d751463119e92857d019_971	E_coli_7_03649	4840fb5d2d4897d217f65ba1ef1b22a7_1522
rpsR		30S ribosomal protein S18	6	6	1	4	1633				227	227	227	81f6f292c45231c81cff920b572a826a_8196	d5a5a6aae91cabb186fe594057e8ea03_8405	ea50daa39c6c4a0574d509aa68b507b7_4973	4cb190364575d751463119e92857d019_8274	E_coli_7_02172	4840fb5d2d4897d217f65ba1ef1b22a7_8644
decR		DNA-binding transcriptional regulator DecR	6	6	1	4	5566				458	458	458	81f6f292c45231c81cff920b572a826a_6700	d5a5a6aae91cabb186fe594057e8ea03_7061	ea50daa39c6c4a0574d509aa68b507b7_3668	4cb190364575d751463119e92857d019_6674	E_coli_7_01479	4840fb5d2d4897d217f65ba1ef1b22a7_7252
ytjB		YtjB family periplasmic protein	6	6	1	4	1449				644	644	644	81f6f292c45231c81cff920b572a826a_7740	d5a5a6aae91cabb186fe594057e8ea03_8066	ea50daa39c6c4a0574d509aa68b507b7_4654	4cb190364575d751463119e92857d019_7668	E_coli_7_01058	4840fb5d2d4897d217f65ba1ef1b22a7_8312
yajI		DUF3251 domain-containing protein	6	6	1	4	5529				539	539	539	81f6f292c45231c81cff920b572a826a_6770	d5a5a6aae91cabb186fe594057e8ea03_7137	ea50daa39c6c4a0574d509aa68b507b7_3744	4cb190364575d751463119e92857d019_6744	E_coli_7_01514	4840fb5d2d4897d217f65ba1ef1b22a7_7328
artM		arginine ABC transporter permease ArtM	6	6	1	4	3401				668	668	668	81f6f292c45231c81cff920b572a826a_5891	d5a5a6aae91cabb186fe594057e8ea03_6239	ea50daa39c6c4a0574d509aa68b507b7_2859	4cb190364575d751463119e92857d019_5865	E_coli_7_03183	4840fb5d2d4897d217f65ba1ef1b22a7_6456
rpsJ		30S ribosomal protein S10	6	6	1	4	4865				311	311	311	81f6f292c45231c81cff920b572a826a_782	d5a5a6aae91cabb186fe594057e8ea03_779	ea50daa39c6c4a0574d509aa68b507b7_6945	4cb190364575d751463119e92857d019_792	E_coli_7_01622	4840fb5d2d4897d217f65ba1ef1b22a7_1345
rraB		ribonuclease E inhibitor RraB	6	6	1	4	2298				416	416	416	81f6f292c45231c81cff920b572a826a_8092	d5a5a6aae91cabb186fe594057e8ea03_8289	ea50daa39c6c4a0574d509aa68b507b7_4865	4cb190364575d751463119e92857d019_8168	E_coli_7_04432	4840fb5d2d4897d217f65ba1ef1b22a7_8532
chbG		chitin disaccharide deacetylase	6	6	1	4	3016				758	758	758	81f6f292c45231c81cff920b572a826a_4234	d5a5a6aae91cabb186fe594057e8ea03_4280	ea50daa39c6c4a0574d509aa68b507b7_994	4cb190364575d751463119e92857d019_4075	E_coli_7_00667	4840fb5d2d4897d217f65ba1ef1b22a7_4683
ycjY		alpha/beta hydrolase	6	6	1	4	4610				920	920	920	81f6f292c45231c81cff920b572a826a_4978	d5a5a6aae91cabb186fe594057e8ea03_5109	ea50daa39c6c4a0574d509aa68b507b7_1822	4cb190364575d751463119e92857d019_4949	E_coli_7_01966	4840fb5d2d4897d217f65ba1ef1b22a7_5525
epmC		elongation factor P hydroxylase	6	6	1	4	4105				548	548	548	81f6f292c45231c81cff920b572a826a_2867	d5a5a6aae91cabb186fe594057e8ea03_2948	ea50daa39c6c4a0574d509aa68b507b7_9106	4cb190364575d751463119e92857d019_2856	E_coli_7_00074	4840fb5d2d4897d217f65ba1ef1b22a7_3440
ymdF		general stress protein	6	6	1	4	3547				173	173	173	81f6f292c45231c81cff920b572a826a_5595	d5a5a6aae91cabb186fe594057e8ea03_5943	ea50daa39c6c4a0574d509aa68b507b7_2565	4cb190364575d751463119e92857d019_5569	E_coli_7_03040	4840fb5d2d4897d217f65ba1ef1b22a7_6160
WP_000750284.1		fimbrial protein	6	6	1	4	3478				542	542	542	81f6f292c45231c81cff920b572a826a_5734	d5a5a6aae91cabb186fe594057e8ea03_6082	ea50daa39c6c4a0574d509aa68b507b7_2704	4cb190364575d751463119e92857d019_5708	E_coli_7_03106	4840fb5d2d4897d217f65ba1ef1b22a7_6299
crl		sigma factor-binding protein Crl	6	6	1	4	5811				401	401	401	81f6f292c45231c81cff920b572a826a_7081	d5a5a6aae91cabb186fe594057e8ea03_7402	ea50daa39c6c4a0574d509aa68b507b7_3973	4cb190364575d751463119e92857d019_7013	E_coli_7_04144	4840fb5d2d4897d217f65ba1ef1b22a7_7649
rpsN		30S ribosomal protein S14	6	6	1	4	129				305	305	305	81f6f292c45231c81cff920b572a826a_810	d5a5a6aae91cabb186fe594057e8ea03_807	ea50daa39c6c4a0574d509aa68b507b7_6973	4cb190364575d751463119e92857d019_820	E_coli_7_01608	4840fb5d2d4897d217f65ba1ef1b22a7_1373
yohK		CidB/LrgB family autolysis modulator	6	6	1	4	4278				695	695	695	81f6f292c45231c81cff920b572a826a_3226	d5a5a6aae91cabb186fe594057e8ea03_3295	ea50daa39c6c4a0574d509aa68b507b7_9449	4cb190364575d751463119e92857d019_3199	E_coli_7_00245	4840fb5d2d4897d217f65ba1ef1b22a7_3785
osmB		osmotically-inducible lipoprotein OsmB	6	6	1	4	4560				218	218	218	81f6f292c45231c81cff920b572a826a_5076	d5a5a6aae91cabb186fe594057e8ea03_5213	ea50daa39c6c4a0574d509aa68b507b7_1920	4cb190364575d751463119e92857d019_5047	E_coli_7_02012	4840fb5d2d4897d217f65ba1ef1b22a7_5625
murG		undecaprenyldiphospho-muramoylpentapeptide beta-N-acetylglucosaminyltransferase	6	6	1	4	508				1067	1067	1067	81f6f292c45231c81cff920b572a826a_7528	d5a5a6aae91cabb186fe594057e8ea03_7850	ea50daa39c6c4a0574d509aa68b507b7_4426	4cb190364575d751463119e92857d019_7456	E_coli_7_01158	4840fb5d2d4897d217f65ba1ef1b22a7_8096
hha		hemolysin expression modulator Hha	6	6	1	4	5578				218	218	218	81f6f292c45231c81cff920b572a826a_6673	d5a5a6aae91cabb186fe594057e8ea03_7034	ea50daa39c6c4a0574d509aa68b507b7_3641	4cb190364575d751463119e92857d019_6647	E_coli_7_01467	4840fb5d2d4897d217f65ba1ef1b22a7_7225
cedA		cell division activator CedA	6	6	1	4	3018				242	263	259	81f6f292c45231c81cff920b572a826a_4238	d5a5a6aae91cabb186fe594057e8ea03_4284	ea50daa39c6c4a0574d509aa68b507b7_998	4cb190364575d751463119e92857d019_4079	E_coli_7_00669	4840fb5d2d4897d217f65ba1ef1b22a7_4689
purC		phosphoribosylaminoimidazolesuccinocarboxamide synthase	6	6	1	4	3955				713	713	713	81f6f292c45231c81cff920b572a826a_2575	d5a5a6aae91cabb186fe594057e8ea03_2674	ea50daa39c6c4a0574d509aa68b507b7_8806	4cb190364575d751463119e92857d019_2579	E_coli_7_03503	4840fb5d2d4897d217f65ba1ef1b22a7_3166
mreD		rod shape-determining protein MreD	6	6	1	4	181				488	488	488	81f6f292c45231c81cff920b572a826a_933	d5a5a6aae91cabb186fe594057e8ea03_928	ea50daa39c6c4a0574d509aa68b507b7_7094	4cb190364575d751463119e92857d019_943	E_coli_7_03663	4840fb5d2d4897d217f65ba1ef1b22a7_1494
folX		dihydroneopterin triphosphate 2'-epimerase	6	6	1	4	4129				362	362	362	81f6f292c45231c81cff920b572a826a_2913	d5a5a6aae91cabb186fe594057e8ea03_2994	ea50daa39c6c4a0574d509aa68b507b7_9152	4cb190364575d751463119e92857d019_2902	E_coli_7_00097	4840fb5d2d4897d217f65ba1ef1b22a7_3486
hdfR		HTH-type transcriptional regulator HdfR	6	6	1	4	1229				839	839	839	81f6f292c45231c81cff920b572a826a_9172	d5a5a6aae91cabb186fe594057e8ea03_9607	ea50daa39c6c4a0574d509aa68b507b7_6047	4cb190364575d751463119e92857d019_9246	E_coli_7_04216	4840fb5d2d4897d217f65ba1ef1b22a7_441
cysQ		3'(2'),5'-bisphosphate nucleotidase CysQ	6	6	1	4	654				740	740	740	81f6f292c45231c81cff920b572a826a_8166	d5a5a6aae91cabb186fe594057e8ea03_8367	ea50daa39c6c4a0574d509aa68b507b7_4943	4cb190364575d751463119e92857d019_8244	E_coli_7_02159	4840fb5d2d4897d217f65ba1ef1b22a7_8606
hupB		DNA-binding protein HU-beta	6	6	1	4	5559				272	272	272	81f6f292c45231c81cff920b572a826a_6714	d5a5a6aae91cabb186fe594057e8ea03_7075	ea50daa39c6c4a0574d509aa68b507b7_3682	4cb190364575d751463119e92857d019_6688	E_coli_7_01486	4840fb5d2d4897d217f65ba1ef1b22a7_7266
ycaR		protein YcaR	6	6	1	4	3457				182	182	182	81f6f292c45231c81cff920b572a826a_5776	d5a5a6aae91cabb186fe594057e8ea03_6124	ea50daa39c6c4a0574d509aa68b507b7_2746	4cb190364575d751463119e92857d019_5750	E_coli_7_03127	4840fb5d2d4897d217f65ba1ef1b22a7_6341
rpsS		30S ribosomal protein S19	6	6	1	4	120				278	278	278	81f6f292c45231c81cff920b572a826a_792	d5a5a6aae91cabb186fe594057e8ea03_789	ea50daa39c6c4a0574d509aa68b507b7_6955	4cb190364575d751463119e92857d019_802	E_coli_7_01617	4840fb5d2d4897d217f65ba1ef1b22a7_1355
pstB		phosphate ABC transporter ATP-binding protein PstB	6	6	1	4	5163				773	773	773	81f6f292c45231c81cff920b572a826a_9260	d5a5a6aae91cabb186fe594057e8ea03_9695	ea50daa39c6c4a0574d509aa68b507b7_6135	4cb190364575d751463119e92857d019_9334	E_coli_7_02971	4840fb5d2d4897d217f65ba1ef1b22a7_529
ftsA		cell division protein FtsA	6	6	1	4	512				1262	1262	1262	81f6f292c45231c81cff920b572a826a_7520	d5a5a6aae91cabb186fe594057e8ea03_7842	ea50daa39c6c4a0574d509aa68b507b7_4418	4cb190364575d751463119e92857d019_7448	E_coli_7_01162	4840fb5d2d4897d217f65ba1ef1b22a7_8088
infC		translation initiation factor IF-3	6	6	1	4	3031				434	542	524	81f6f292c45231c81cff920b572a826a_4264	d5a5a6aae91cabb186fe594057e8ea03_4312	ea50daa39c6c4a0574d509aa68b507b7_1026	4cb190364575d751463119e92857d019_4105	E_coli_7_00683	4840fb5d2d4897d217f65ba1ef1b22a7_4715
dps		DNA starvation/stationary phase protection protein Dps	6	6	1	4	18				503	503	503	81f6f292c45231c81cff920b572a826a_5997	d5a5a6aae91cabb186fe594057e8ea03_6341	ea50daa39c6c4a0574d509aa68b507b7_2963	4cb190364575d751463119e92857d019_5971	E_coli_7_03314	4840fb5d2d4897d217f65ba1ef1b22a7_6558
feoA		ferrous iron transporter A	6	6	1	4	4936				227	227	227	81f6f292c45231c81cff920b572a826a_614	d5a5a6aae91cabb186fe594057e8ea03_633	ea50daa39c6c4a0574d509aa68b507b7_6809	4cb190364575d751463119e92857d019_624	E_coli_7_01711	4840fb5d2d4897d217f65ba1ef1b22a7_1209
nupG		nucleoside permease NupG	6	6	1	4	395				1256	1256	1256	81f6f292c45231c81cff920b572a826a_1525	d5a5a6aae91cabb186fe594057e8ea03_1622	ea50daa39c6c4a0574d509aa68b507b7_7786	4cb190364575d751463119e92857d019_1545	E_coli_7_02544	4840fb5d2d4897d217f65ba1ef1b22a7_2088
araC		arabinose operon transcriptional regulator AraC	6	6	1	4	6076				878	878	878	81f6f292c45231c81cff920b572a826a_7585	d5a5a6aae91cabb186fe594057e8ea03_7907	ea50daa39c6c4a0574d509aa68b507b7_4483	4cb190364575d751463119e92857d019_7513	E_coli_7_01133	4840fb5d2d4897d217f65ba1ef1b22a7_8153
holE		DNA polymerase III subunit theta	6	6	1	4	2902				230	230	230	81f6f292c45231c81cff920b572a826a_4012	d5a5a6aae91cabb186fe594057e8ea03_4072	ea50daa39c6c4a0574d509aa68b507b7_766	4cb190364575d751463119e92857d019_3849	E_coli_7_00559	4840fb5d2d4897d217f65ba1ef1b22a7_4455
atpH		F0F1 ATP synthase subunit delta	6	6	1	4	5150				533	533	533	81f6f292c45231c81cff920b572a826a_9232	d5a5a6aae91cabb186fe594057e8ea03_9667	ea50daa39c6c4a0574d509aa68b507b7_6107	4cb190364575d751463119e92857d019_9306	E_coli_7_02985	4840fb5d2d4897d217f65ba1ef1b22a7_501
livF		high-affinity branched-chain amino acid ABC transporter ATP-binding protein LivF	6	6	1	4	4984				713	713	713	81f6f292c45231c81cff920b572a826a_528	d5a5a6aae91cabb186fe594057e8ea03_535	ea50daa39c6c4a0574d509aa68b507b7_6713	4cb190364575d751463119e92857d019_530	E_coli_7_01754	4840fb5d2d4897d217f65ba1ef1b22a7_1111
rimK		30S ribosomal protein S6--L-glutamate ligase	6	6	1	4	3392				902	902	902	81f6f292c45231c81cff920b572a826a_5909	d5a5a6aae91cabb186fe594057e8ea03_6257	ea50daa39c6c4a0574d509aa68b507b7_2879	4cb190364575d751463119e92857d019_5883	E_coli_7_03192	4840fb5d2d4897d217f65ba1ef1b22a7_6474
group_3388	flgC	flagellar basal body rod protein FlgC	6	6	1	4	4364				404	404	404	81f6f292c45231c81cff920b572a826a_5475	d5a5a6aae91cabb186fe594057e8ea03_5726	ea50daa39c6c4a0574d509aa68b507b7_2433	4cb190364575d751463119e92857d019_5452	E_coli_7_03826	4840fb5d2d4897d217f65ba1ef1b22a7_6020
tdcF		enamine/imine deaminase	6	6	1	4	5910				389	389	389	81f6f292c45231c81cff920b572a826a_1200	d5a5a6aae91cabb186fe594057e8ea03_1195	ea50daa39c6c4a0574d509aa68b507b7_7359	4cb190364575d751463119e92857d019_1212	E_coli_7_03857	4840fb5d2d4897d217f65ba1ef1b22a7_1761
ydhY		ferredoxin-like protein	6	6	1	4	3075				584	626	619	81f6f292c45231c81cff920b572a826a_4358	d5a5a6aae91cabb186fe594057e8ea03_4404	ea50daa39c6c4a0574d509aa68b507b7_1118	4cb190364575d751463119e92857d019_4199	E_coli_7_00727	4840fb5d2d4897d217f65ba1ef1b22a7_4809
yfiB		OmpA family protein	6	6	1	4	4292				482	482	482	81f6f292c45231c81cff920b572a826a_2304	d5a5a6aae91cabb186fe594057e8ea03_2403	ea50daa39c6c4a0574d509aa68b507b7_8539	4cb190364575d751463119e92857d019_2308	E_coli_7_02596	4840fb5d2d4897d217f65ba1ef1b22a7_2863
ilvM		acetolactate synthase 2 small subunit	6	6	1	4	1207				263	263	263	81f6f292c45231c81cff920b572a826a_9160	d5a5a6aae91cabb186fe594057e8ea03_9595	ea50daa39c6c4a0574d509aa68b507b7_5999	4cb190364575d751463119e92857d019_9234	E_coli_7_04220	4840fb5d2d4897d217f65ba1ef1b22a7_429
dgoR		D-galactonate utilization transcriptional regulator DgoR	6	6	1	4	5195				689	689	689	81f6f292c45231c81cff920b572a826a_17	d5a5a6aae91cabb186fe594057e8ea03_17	ea50daa39c6c4a0574d509aa68b507b7_6199	4cb190364575d751463119e92857d019_17	E_coli_7_02942	4840fb5d2d4897d217f65ba1ef1b22a7_591
yehR		YehR family lipoprotein	6	6	1	4	3762				461	461	461	81f6f292c45231c81cff920b572a826a_3264	d5a5a6aae91cabb186fe594057e8ea03_3337	ea50daa39c6c4a0574d509aa68b507b7_9489	4cb190364575d751463119e92857d019_3237	E_coli_7_00264	4840fb5d2d4897d217f65ba1ef1b22a7_3823
bcsF		cellulose biosynthesis protein BcsF	6	6	1	4	5076				191	191	191	81f6f292c45231c81cff920b572a826a_356	d5a5a6aae91cabb186fe594057e8ea03_363	ea50daa39c6c4a0574d509aa68b507b7_6545	4cb190364575d751463119e92857d019_354	E_coli_7_01844	4840fb5d2d4897d217f65ba1ef1b22a7_939
lipA		lipoyl synthase	6	6	1	4	5386				965	965	965	81f6f292c45231c81cff920b572a826a_6403	d5a5a6aae91cabb186fe594057e8ea03_6723	ea50daa39c6c4a0574d509aa68b507b7_3343	4cb190364575d751463119e92857d019_6377	E_coli_7_01334	4840fb5d2d4897d217f65ba1ef1b22a7_6937
alaE		L-alanine exporter AlaE	6	6	1	4	1109				449	449	449	81f6f292c45231c81cff920b572a826a_2234	d5a5a6aae91cabb186fe594057e8ea03_2335	ea50daa39c6c4a0574d509aa68b507b7_8471	4cb190364575d751463119e92857d019_2235	E_coli_7_02631	4840fb5d2d4897d217f65ba1ef1b22a7_2773
lapA		lipopolysaccharide assembly protein LapA	6	6	1	4	4556				308	308	308	81f6f292c45231c81cff920b572a826a_5084	d5a5a6aae91cabb186fe594057e8ea03_5221	ea50daa39c6c4a0574d509aa68b507b7_1928	4cb190364575d751463119e92857d019_5055	E_coli_7_02016	4840fb5d2d4897d217f65ba1ef1b22a7_5633
nfo		deoxyribonuclease IV	6	6	1	4	4261				857	857	857	81f6f292c45231c81cff920b572a826a_3192	d5a5a6aae91cabb186fe594057e8ea03_3261	ea50daa39c6c4a0574d509aa68b507b7_9415	4cb190364575d751463119e92857d019_3165	E_coli_7_00228	4840fb5d2d4897d217f65ba1ef1b22a7_3751
cyaY		iron donor protein CyaY	6	6	1	4	1172				320	320	320	81f6f292c45231c81cff920b572a826a_9080	d5a5a6aae91cabb186fe594057e8ea03_9515	ea50daa39c6c4a0574d509aa68b507b7_5919	4cb190364575d751463119e92857d019_9154	E_coli_7_04258	4840fb5d2d4897d217f65ba1ef1b22a7_349
tnpA		IS200/IS605 family transposase	6	7	1.17	4	1635				425	962	531	81f6f292c45231c81cff920b572a826a_8188	d5a5a6aae91cabb186fe594057e8ea03_4164	ea50daa39c6c4a0574d509aa68b507b7_862 ea50daa39c6c4a0574d509aa68b507b7_4965	4cb190364575d751463119e92857d019_8266	E_coli_7_02169	4840fb5d2d4897d217f65ba1ef1b22a7_4551
ydhU		thiosulfate reductase cytochrome B subunit	6	6	1	4	3079				785	785	785	81f6f292c45231c81cff920b572a826a_4366	d5a5a6aae91cabb186fe594057e8ea03_4414	ea50daa39c6c4a0574d509aa68b507b7_1126	4cb190364575d751463119e92857d019_4207	E_coli_7_00731	4840fb5d2d4897d217f65ba1ef1b22a7_4817
ybdD		YbdD/YjiX family protein	6	6	1	4	5415				197	197	197	81f6f292c45231c81cff920b572a826a_6459	d5a5a6aae91cabb186fe594057e8ea03_6779	ea50daa39c6c4a0574d509aa68b507b7_3399	4cb190364575d751463119e92857d019_6433	E_coli_7_01363	4840fb5d2d4897d217f65ba1ef1b22a7_6993
rpoB		DNA-directed RNA polymerase subunit beta	6	6	1	4	713				4028	4028	4028	81f6f292c45231c81cff920b572a826a_8694	d5a5a6aae91cabb186fe594057e8ea03_9133	ea50daa39c6c4a0574d509aa68b507b7_5539	4cb190364575d751463119e92857d019_8768	E_coli_7_04478	4840fb5d2d4897d217f65ba1ef1b22a7_9090
clcA		H(+)/Cl(-) exchange transporter ClcA	6	6	1	4	2571				1421	1421	1421	81f6f292c45231c81cff920b572a826a_7398	d5a5a6aae91cabb186fe594057e8ea03_7715	ea50daa39c6c4a0574d509aa68b507b7_4296	4cb190364575d751463119e92857d019_7326	E_coli_7_01221	4840fb5d2d4897d217f65ba1ef1b22a7_7966
yidC		membrane protein insertase YidC	6	6	1	4	5182				1646	1646	1646	81f6f292c45231c81cff920b572a826a_9300	d5a5a6aae91cabb186fe594057e8ea03_9735	ea50daa39c6c4a0574d509aa68b507b7_6175	4cb190364575d751463119e92857d019_9374	E_coli_7_02952	4840fb5d2d4897d217f65ba1ef1b22a7_567
cysC		adenylyl-sulfate kinase	6	6	1	4	1030				605	605	605	81f6f292c45231c81cff920b572a826a_2065	d5a5a6aae91cabb186fe594057e8ea03_2158	ea50daa39c6c4a0574d509aa68b507b7_8270	4cb190364575d751463119e92857d019_2070	E_coli_7_02714	4840fb5d2d4897d217f65ba1ef1b22a7_2604
tolR		colicin uptake protein TolR	6	6	1	4	62				428	428	428	81f6f292c45231c81cff920b572a826a_6158	d5a5a6aae91cabb186fe594057e8ea03_6504	ea50daa39c6c4a0574d509aa68b507b7_3124	4cb190364575d751463119e92857d019_6132	E_coli_7_03240	4840fb5d2d4897d217f65ba1ef1b22a7_6720
atpA		F0F1 ATP synthase subunit alpha	6	6	1	4	5151				1541	1541	1541	81f6f292c45231c81cff920b572a826a_9234	d5a5a6aae91cabb186fe594057e8ea03_9669	ea50daa39c6c4a0574d509aa68b507b7_6109	4cb190364575d751463119e92857d019_9308	E_coli_7_02984	4840fb5d2d4897d217f65ba1ef1b22a7_503
aroK		shikimate kinase AroK	6	6	1	4	4915				521	521	521	81f6f292c45231c81cff920b572a826a_654	d5a5a6aae91cabb186fe594057e8ea03_669	ea50daa39c6c4a0574d509aa68b507b7_6845	4cb190364575d751463119e92857d019_664	E_coli_7_01691	4840fb5d2d4897d217f65ba1ef1b22a7_1245
hycH		formate hydrogenlyase assembly protein HycH	6	6	1	4	1067				410	410	410	81f6f292c45231c81cff920b572a826a_2131	d5a5a6aae91cabb186fe594057e8ea03_2232	ea50daa39c6c4a0574d509aa68b507b7_8344	4cb190364575d751463119e92857d019_2136	E_coli_7_02681	4840fb5d2d4897d217f65ba1ef1b22a7_2670
cheZ		protein phosphatase CheZ	6	6	1	4	2860				644	644	644	81f6f292c45231c81cff920b572a826a_3930	d5a5a6aae91cabb186fe594057e8ea03_3990	ea50daa39c6c4a0574d509aa68b507b7_656	4cb190364575d751463119e92857d019_3767	E_coli_7_00502	4840fb5d2d4897d217f65ba1ef1b22a7_4369
ydhT		protein YdhT	6	6	1	4	3080				764	812	804	81f6f292c45231c81cff920b572a826a_4368	d5a5a6aae91cabb186fe594057e8ea03_4416	ea50daa39c6c4a0574d509aa68b507b7_1128	4cb190364575d751463119e92857d019_4209	E_coli_7_00732	4840fb5d2d4897d217f65ba1ef1b22a7_4819
pyrG		CTP synthase (glutamine hydrolyzing)	6	6	1	4	6301				1637	1637	1637	81f6f292c45231c81cff920b572a826a_2001	d5a5a6aae91cabb186fe594057e8ea03_2094	ea50daa39c6c4a0574d509aa68b507b7_8206	4cb190364575d751463119e92857d019_2006	E_coli_7_02745	4840fb5d2d4897d217f65ba1ef1b22a7_2540
fnr		fumarate/nitrate reduction transcriptional regulator Fnr	6	6	1	4	4616				752	752	752	81f6f292c45231c81cff920b572a826a_4966	d5a5a6aae91cabb186fe594057e8ea03_5097	ea50daa39c6c4a0574d509aa68b507b7_1810	4cb190364575d751463119e92857d019_4937	E_coli_7_01960	4840fb5d2d4897d217f65ba1ef1b22a7_5513
gloC		hydroxyacylglutathione hydrolase GloC	6	6	1	4	3467				647	647	647	81f6f292c45231c81cff920b572a826a_5756	d5a5a6aae91cabb186fe594057e8ea03_6104	ea50daa39c6c4a0574d509aa68b507b7_2726	4cb190364575d751463119e92857d019_5730	E_coli_7_03117	4840fb5d2d4897d217f65ba1ef1b22a7_6321
yqfA		hemolysin III family protein	6	6	1	4	6151				659	659	659	81f6f292c45231c81cff920b572a826a_1678	d5a5a6aae91cabb186fe594057e8ea03_1769	ea50daa39c6c4a0574d509aa68b507b7_7933	4cb190364575d751463119e92857d019_1690	E_coli_7_02473	4840fb5d2d4897d217f65ba1ef1b22a7_2231
yhhA		DUF2756 family protein	6	6	1	4	4978				440	440	440	81f6f292c45231c81cff920b572a826a_540	d5a5a6aae91cabb186fe594057e8ea03_547	ea50daa39c6c4a0574d509aa68b507b7_6725	4cb190364575d751463119e92857d019_542	E_coli_7_01748	4840fb5d2d4897d217f65ba1ef1b22a7_1123
napB		nitrate reductase cytochrome c-type subunit	6	6	1	4	4220				449	449	449	81f6f292c45231c81cff920b572a826a_3105	d5a5a6aae91cabb186fe594057e8ea03_3174	ea50daa39c6c4a0574d509aa68b507b7_9328	4cb190364575d751463119e92857d019_3078	E_coli_7_00185	4840fb5d2d4897d217f65ba1ef1b22a7_3664
metJ		met regulon transcriptional regulator MetJ	6	6	1	4	5319				317	317	317	81f6f292c45231c81cff920b572a826a_8805	d5a5a6aae91cabb186fe594057e8ea03_9240	ea50daa39c6c4a0574d509aa68b507b7_5642	4cb190364575d751463119e92857d019_8879	E_coli_7_04061	4840fb5d2d4897d217f65ba1ef1b22a7_64
frdA		fumarate reductase (quinol) flavoprotein subunit	6	6	1	4	1588				1808	1808	1808	81f6f292c45231c81cff920b572a826a_8295	d5a5a6aae91cabb186fe594057e8ea03_8508	ea50daa39c6c4a0574d509aa68b507b7_5072	4cb190364575d751463119e92857d019_8371	E_coli_7_02219	4840fb5d2d4897d217f65ba1ef1b22a7_8741
ppx		exopolyphosphatase	6	6	1	4	3929				1541	1541	1541	81f6f292c45231c81cff920b572a826a_2523	d5a5a6aae91cabb186fe594057e8ea03_2622	ea50daa39c6c4a0574d509aa68b507b7_8754	4cb190364575d751463119e92857d019_2527	E_coli_7_03473	4840fb5d2d4897d217f65ba1ef1b22a7_3114
xerD		site-specific tyrosine recombinase XerD	6	6	1	4	6156				896	896	896	81f6f292c45231c81cff920b572a826a_1688	d5a5a6aae91cabb186fe594057e8ea03_1779	ea50daa39c6c4a0574d509aa68b507b7_7943	4cb190364575d751463119e92857d019_1700	E_coli_7_02468	4840fb5d2d4897d217f65ba1ef1b22a7_2241
ydhL		DUF1289 domain-containing protein	6	6	1	4	3100				239	269	244	81f6f292c45231c81cff920b572a826a_4414	d5a5a6aae91cabb186fe594057e8ea03_4462	ea50daa39c6c4a0574d509aa68b507b7_1174	4cb190364575d751463119e92857d019_4255	E_coli_7_00754	4840fb5d2d4897d217f65ba1ef1b22a7_4865
hpaR		homoprotocatechuate degradation operon regulator HpaR	6	6	1	4	1411				446	446	446	81f6f292c45231c81cff920b572a826a_7807	d5a5a6aae91cabb186fe594057e8ea03_8139	ea50daa39c6c4a0574d509aa68b507b7_4727	4cb190364575d751463119e92857d019_7845	E_coli_7_01023	4840fb5d2d4897d217f65ba1ef1b22a7_8385
yqjA		DedA family protein	6	6	1	4	5926				662	662	662	81f6f292c45231c81cff920b572a826a_1232	d5a5a6aae91cabb186fe594057e8ea03_1227	ea50daa39c6c4a0574d509aa68b507b7_7391	4cb190364575d751463119e92857d019_1244	E_coli_7_03873	4840fb5d2d4897d217f65ba1ef1b22a7_1793
thiB		thiamine ABC transporter substrate binding subunit	6	6	1	4	484				983	983	983	81f6f292c45231c81cff920b572a826a_7577	d5a5a6aae91cabb186fe594057e8ea03_7899	ea50daa39c6c4a0574d509aa68b507b7_4475	4cb190364575d751463119e92857d019_7505	E_coli_7_01137	4840fb5d2d4897d217f65ba1ef1b22a7_8145
yaiA		YaiA family protein	6	6	1	4	5504				191	191	191	81f6f292c45231c81cff920b572a826a_6816	d5a5a6aae91cabb186fe594057e8ea03_7181	ea50daa39c6c4a0574d509aa68b507b7_3788	4cb190364575d751463119e92857d019_6788	E_coli_7_01536	4840fb5d2d4897d217f65ba1ef1b22a7_7372
ubiT		SCP2 domain-containing protein	6	6	1	4	266				524	524	524	81f6f292c45231c81cff920b572a826a_1109	d5a5a6aae91cabb186fe594057e8ea03_1102	ea50daa39c6c4a0574d509aa68b507b7_7268	4cb190364575d751463119e92857d019_1119	E_coli_7_03578	4840fb5d2d4897d217f65ba1ef1b22a7_1668
fbaA		class II fructose-bisphosphate aldolase	6	6	1	4	6123				1079	1079	1079	81f6f292c45231c81cff920b572a826a_1619	d5a5a6aae91cabb186fe594057e8ea03_1710	ea50daa39c6c4a0574d509aa68b507b7_7872	4cb190364575d751463119e92857d019_1631	E_coli_7_02498	4840fb5d2d4897d217f65ba1ef1b22a7_2172
glpG		rhomboid family intramembrane serine protease GlpG	6	6	1	4	4950				830	830	830	81f6f292c45231c81cff920b572a826a_584	d5a5a6aae91cabb186fe594057e8ea03_603	ea50daa39c6c4a0574d509aa68b507b7_6779	4cb190364575d751463119e92857d019_594	E_coli_7_01727	4840fb5d2d4897d217f65ba1ef1b22a7_1179
yggN		DUF2884 domain-containing protein	6	6	1	4	401				719	719	719	81f6f292c45231c81cff920b572a826a_1537	d5a5a6aae91cabb186fe594057e8ea03_1634	ea50daa39c6c4a0574d509aa68b507b7_7798	4cb190364575d751463119e92857d019_1557	E_coli_7_02538	4840fb5d2d4897d217f65ba1ef1b22a7_2100
pgk		phosphoglycerate kinase	6	6	1	4	6122				1163	1163	1163	81f6f292c45231c81cff920b572a826a_1617	d5a5a6aae91cabb186fe594057e8ea03_1708	ea50daa39c6c4a0574d509aa68b507b7_7870	4cb190364575d751463119e92857d019_1629	E_coli_7_02499	4840fb5d2d4897d217f65ba1ef1b22a7_2170
der		ribosome biogenesis GTPase Der	6	6	1	4	3905				1472	1472	1472	81f6f292c45231c81cff920b572a826a_2503	d5a5a6aae91cabb186fe594057e8ea03_2602	ea50daa39c6c4a0574d509aa68b507b7_8734	4cb190364575d751463119e92857d019_2507	E_coli_7_03463	4840fb5d2d4897d217f65ba1ef1b22a7_3062
ydhJ		HlyD family secretion protein	6	6	1	4	3104				770	857	842	81f6f292c45231c81cff920b572a826a_4422	d5a5a6aae91cabb186fe594057e8ea03_4470	ea50daa39c6c4a0574d509aa68b507b7_1182	4cb190364575d751463119e92857d019_4263	E_coli_7_00758	4840fb5d2d4897d217f65ba1ef1b22a7_4873
rplS		50S ribosomal protein L19	6	6	1	4	4293				347	347	347	81f6f292c45231c81cff920b572a826a_2302	d5a5a6aae91cabb186fe594057e8ea03_2401	ea50daa39c6c4a0574d509aa68b507b7_8537	4cb190364575d751463119e92857d019_2306	E_coli_7_02597	4840fb5d2d4897d217f65ba1ef1b22a7_2861
ybaN		DUF454 family protein	6	6	1	4	5586				377	377	377	81f6f292c45231c81cff920b572a826a_6657	d5a5a6aae91cabb186fe594057e8ea03_7018	ea50daa39c6c4a0574d509aa68b507b7_3625	4cb190364575d751463119e92857d019_6631	E_coli_7_01459	4840fb5d2d4897d217f65ba1ef1b22a7_7209
hcaB		3-phenylpropionate-dihydrodiol/cinnamic acid-dihydrodiol dehydrogenase	6	6	1	4	3874				812	812	812	81f6f292c45231c81cff920b572a826a_2441	d5a5a6aae91cabb186fe594057e8ea03_2542	ea50daa39c6c4a0574d509aa68b507b7_8674	4cb190364575d751463119e92857d019_2445	E_coli_7_03433	4840fb5d2d4897d217f65ba1ef1b22a7_3000
rhlB		ATP-dependent RNA helicase RhlB	6	6	1	4	1197				1265	1265	1265	81f6f292c45231c81cff920b572a826a_9140	d5a5a6aae91cabb186fe594057e8ea03_9575	ea50daa39c6c4a0574d509aa68b507b7_5979	4cb190364575d751463119e92857d019_9214	E_coli_7_04230	4840fb5d2d4897d217f65ba1ef1b22a7_409
cpxR		envelope stress response regulator transcription factor CpxR	6	6	1	4	6057				698	698	698	81f6f292c45231c81cff920b572a826a_8857	d5a5a6aae91cabb186fe594057e8ea03_9296	ea50daa39c6c4a0574d509aa68b507b7_5698	4cb190364575d751463119e92857d019_8933	E_coli_7_04035	4840fb5d2d4897d217f65ba1ef1b22a7_120
wecA		UDP-N-acetylglucosamine--undecaprenyl-phosphate N-acetylglucosaminephosphotransferase	6	6	1	4	1192				1103	1103	1103	81f6f292c45231c81cff920b572a826a_9132	d5a5a6aae91cabb186fe594057e8ea03_9567	ea50daa39c6c4a0574d509aa68b507b7_5971	4cb190364575d751463119e92857d019_9206	E_coli_7_04234	4840fb5d2d4897d217f65ba1ef1b22a7_401
yqhD		alcohol dehydrogenase	6	6	1	4	6014				1163	1163	1163	81f6f292c45231c81cff920b572a826a_1404	d5a5a6aae91cabb186fe594057e8ea03_1495	ea50daa39c6c4a0574d509aa68b507b7_7561	4cb190364575d751463119e92857d019_1424	E_coli_7_03954	4840fb5d2d4897d217f65ba1ef1b22a7_1965
rpmA		50S ribosomal protein L27	6	6	1	4	239				257	257	257	81f6f292c45231c81cff920b572a826a_1049	d5a5a6aae91cabb186fe594057e8ea03_1042	ea50daa39c6c4a0574d509aa68b507b7_7208	4cb190364575d751463119e92857d019_1059	E_coli_7_03606	4840fb5d2d4897d217f65ba1ef1b22a7_1608
WP_001297679.1		YcgL domain-containing protein	6	6	1	4	4451				293	293	293	81f6f292c45231c81cff920b572a826a_5307	d5a5a6aae91cabb186fe594057e8ea03_5440	ea50daa39c6c4a0574d509aa68b507b7_2259	4cb190364575d751463119e92857d019_5280	E_coli_7_02124	4840fb5d2d4897d217f65ba1ef1b22a7_5848
gcvT		glycine cleavage system aminomethyltransferase GcvT	6	6	1	4	6145				1094	1094	1094	81f6f292c45231c81cff920b572a826a_1666	d5a5a6aae91cabb186fe594057e8ea03_1757	ea50daa39c6c4a0574d509aa68b507b7_7921	4cb190364575d751463119e92857d019_1678	E_coli_7_02479	4840fb5d2d4897d217f65ba1ef1b22a7_2219
rsxC		electron transport complex subunit RsxC	6	6	1	4	3119				2126	2222	2206	81f6f292c45231c81cff920b572a826a_4452	d5a5a6aae91cabb186fe594057e8ea03_4500	ea50daa39c6c4a0574d509aa68b507b7_1212	4cb190364575d751463119e92857d019_4293	E_coli_7_00774	4840fb5d2d4897d217f65ba1ef1b22a7_4903
rseB		sigma-E factor regulatory protein RseB	6	6	1	4	3843				956	956	956	81f6f292c45231c81cff920b572a826a_2379	d5a5a6aae91cabb186fe594057e8ea03_2480	ea50daa39c6c4a0574d509aa68b507b7_8612	4cb190364575d751463119e92857d019_2383	E_coli_7_03403	4840fb5d2d4897d217f65ba1ef1b22a7_2938
fis		DNA-binding transcriptional regulator Fis	6	6	1	4	169				296	296	296	81f6f292c45231c81cff920b572a826a_909	d5a5a6aae91cabb186fe594057e8ea03_906	ea50daa39c6c4a0574d509aa68b507b7_7072	4cb190364575d751463119e92857d019_919	E_coli_7_03674	4840fb5d2d4897d217f65ba1ef1b22a7_1472
rplT		50S ribosomal protein L20	6	6	1	4	3033				356	356	356	81f6f292c45231c81cff920b572a826a_4268	d5a5a6aae91cabb186fe594057e8ea03_4316	ea50daa39c6c4a0574d509aa68b507b7_1030	4cb190364575d751463119e92857d019_4109	E_coli_7_00685	4840fb5d2d4897d217f65ba1ef1b22a7_4719
artP		arginine ABC transporter ATP-binding protein ArtP	6	6	1	4	3404				728	728	728	81f6f292c45231c81cff920b572a826a_5885	d5a5a6aae91cabb186fe594057e8ea03_6233	ea50daa39c6c4a0574d509aa68b507b7_2853	4cb190364575d751463119e92857d019_5859	E_coli_7_03180	4840fb5d2d4897d217f65ba1ef1b22a7_6450
yhbE		DMT family transporter	6	6	1	4	240				965	965	965	81f6f292c45231c81cff920b572a826a_1051	d5a5a6aae91cabb186fe594057e8ea03_1044	ea50daa39c6c4a0574d509aa68b507b7_7210	4cb190364575d751463119e92857d019_1061	E_coli_7_03605	4840fb5d2d4897d217f65ba1ef1b22a7_1610
gpt		xanthine phosphoribosyltransferase	6	6	1	4	5809				458	458	458	81f6f292c45231c81cff920b572a826a_7085	d5a5a6aae91cabb186fe594057e8ea03_7406	ea50daa39c6c4a0574d509aa68b507b7_3977	4cb190364575d751463119e92857d019_7017	E_coli_7_04146	4840fb5d2d4897d217f65ba1ef1b22a7_7653
ygaZ		L-valine exporter subunit YgaZ	6	6	1	4	1101				737	737	737	81f6f292c45231c81cff920b572a826a_2212	d5a5a6aae91cabb186fe594057e8ea03_2313	ea50daa39c6c4a0574d509aa68b507b7_8421	4cb190364575d751463119e92857d019_2213	E_coli_7_02642	4840fb5d2d4897d217f65ba1ef1b22a7_2751
yqiA		esterase YqiA	6	6	1	4	5997				581	581	581	81f6f292c45231c81cff920b572a826a_1372	d5a5a6aae91cabb186fe594057e8ea03_1463	ea50daa39c6c4a0574d509aa68b507b7_7529	4cb190364575d751463119e92857d019_1386	E_coli_7_03938	4840fb5d2d4897d217f65ba1ef1b22a7_1933
robA		MDR efflux pump AcrAB transcriptional activator RobA	6	6	1	4	1440				869	869	869	81f6f292c45231c81cff920b572a826a_7722	d5a5a6aae91cabb186fe594057e8ea03_8048	ea50daa39c6c4a0574d509aa68b507b7_4634	4cb190364575d751463119e92857d019_7650	E_coli_7_01067	4840fb5d2d4897d217f65ba1ef1b22a7_8294
yciI		YciI family protein	6	6	1	4	4523				296	296	296	81f6f292c45231c81cff920b572a826a_5153	d5a5a6aae91cabb186fe594057e8ea03_5284	ea50daa39c6c4a0574d509aa68b507b7_2108	4cb190364575d751463119e92857d019_5124	E_coli_7_02048	4840fb5d2d4897d217f65ba1ef1b22a7_5696
fliA		RNA polymerase sigma factor FliA	6	6	1	4	2823				719	719	719	81f6f292c45231c81cff920b572a826a_3847	d5a5a6aae91cabb186fe594057e8ea03_3905	ea50daa39c6c4a0574d509aa68b507b7_573	4cb190364575d751463119e92857d019_3684	E_coli_7_00464	4840fb5d2d4897d217f65ba1ef1b22a7_4286
zapC		cell division protein ZapC	6	6	1	4	3486				542	542	542	81f6f292c45231c81cff920b572a826a_5718	d5a5a6aae91cabb186fe594057e8ea03_6066	ea50daa39c6c4a0574d509aa68b507b7_2688	4cb190364575d751463119e92857d019_5692	E_coli_7_03098	4840fb5d2d4897d217f65ba1ef1b22a7_6283
cgtA		Obg family GTPase CgtA	6	6	1	4	241				1172	1172	1172	81f6f292c45231c81cff920b572a826a_1053	d5a5a6aae91cabb186fe594057e8ea03_1046	ea50daa39c6c4a0574d509aa68b507b7_7212	4cb190364575d751463119e92857d019_1063	E_coli_7_03604	4840fb5d2d4897d217f65ba1ef1b22a7_1612
glgC		glucose-1-phosphate adenylyltransferase	6	6	1	4	4959				1295	1295	1295	81f6f292c45231c81cff920b572a826a_566	d5a5a6aae91cabb186fe594057e8ea03_585	ea50daa39c6c4a0574d509aa68b507b7_6761	4cb190364575d751463119e92857d019_576	E_coli_7_01736	4840fb5d2d4897d217f65ba1ef1b22a7_1161
yfbR		5'-deoxynucleotidase	6	6	1	4	4141				599	599	599	81f6f292c45231c81cff920b572a826a_2937	d5a5a6aae91cabb186fe594057e8ea03_3018	ea50daa39c6c4a0574d509aa68b507b7_9176	4cb190364575d751463119e92857d019_2926	E_coli_7_00109	4840fb5d2d4897d217f65ba1ef1b22a7_3510
ygjH		tRNA-binding protein	6	6	1	4	5952				332	332	332	81f6f292c45231c81cff920b572a826a_1284	d5a5a6aae91cabb186fe594057e8ea03_1281	ea50daa39c6c4a0574d509aa68b507b7_7441	4cb190364575d751463119e92857d019_1296	E_coli_7_03897	4840fb5d2d4897d217f65ba1ef1b22a7_1845
marA		MDR efflux pump AcrAB transcriptional activator MarA	6	6	1	4	3215				383	383	383	81f6f292c45231c81cff920b572a826a_4598	d5a5a6aae91cabb186fe594057e8ea03_4751	ea50daa39c6c4a0574d509aa68b507b7_1470	4cb190364575d751463119e92857d019_4561	E_coli_7_00843	4840fb5d2d4897d217f65ba1ef1b22a7_5165
eutS		ethanolamine utilization microcompartment protein EutS	6	6	1	4	3973				335	335	335	81f6f292c45231c81cff920b572a826a_2611	d5a5a6aae91cabb186fe594057e8ea03_2710	ea50daa39c6c4a0574d509aa68b507b7_8842	4cb190364575d751463119e92857d019_2615	E_coli_7_03520	4840fb5d2d4897d217f65ba1ef1b22a7_3202
bamD		outer membrane protein assembly factor BamD	6	6	1	4	3821				737	737	737	81f6f292c45231c81cff920b572a826a_2323	d5a5a6aae91cabb186fe594057e8ea03_2422	ea50daa39c6c4a0574d509aa68b507b7_8558	4cb190364575d751463119e92857d019_2327	E_coli_7_02588	4840fb5d2d4897d217f65ba1ef1b22a7_2882
hslV		ATP-dependent protease subunit HslV	6	6	1	4	6038				530	530	530	81f6f292c45231c81cff920b572a826a_8819	d5a5a6aae91cabb186fe594057e8ea03_9258	ea50daa39c6c4a0574d509aa68b507b7_5660	4cb190364575d751463119e92857d019_8893	E_coli_7_04055	4840fb5d2d4897d217f65ba1ef1b22a7_82
uidR		DNA-binding transcriptional regulator UidR	6	6	1	4	3131				578	590	588	81f6f292c45231c81cff920b572a826a_4476	d5a5a6aae91cabb186fe594057e8ea03_4524	ea50daa39c6c4a0574d509aa68b507b7_1236	4cb190364575d751463119e92857d019_4317	E_coli_7_00785	4840fb5d2d4897d217f65ba1ef1b22a7_4927
yeiP		elongation factor P-like protein YeiP	6	6	1	4	4248				572	572	572	81f6f292c45231c81cff920b572a826a_3166	d5a5a6aae91cabb186fe594057e8ea03_3235	ea50daa39c6c4a0574d509aa68b507b7_9389	4cb190364575d751463119e92857d019_3139	E_coli_7_00215	4840fb5d2d4897d217f65ba1ef1b22a7_3725
fklB		FKBP-type peptidyl-prolyl cis-trans isomerase	6	6	1	4	661				620	620	620	81f6f292c45231c81cff920b572a826a_8180	d5a5a6aae91cabb186fe594057e8ea03_8381	ea50daa39c6c4a0574d509aa68b507b7_4957	4cb190364575d751463119e92857d019_8258	E_coli_7_02166	4840fb5d2d4897d217f65ba1ef1b22a7_8620
spy		ATP-independent periplasmic protein-refolding chaperone Spy	6	6	1	4	3006				485	485	485	81f6f292c45231c81cff920b572a826a_4214	d5a5a6aae91cabb186fe594057e8ea03_4260	ea50daa39c6c4a0574d509aa68b507b7_974	4cb190364575d751463119e92857d019_4055	E_coli_7_00657	4840fb5d2d4897d217f65ba1ef1b22a7_4663
metA		homoserine O-succinyltransferase	6	6	1	4	736				929	929	929	81f6f292c45231c81cff920b572a826a_8639	d5a5a6aae91cabb186fe594057e8ea03_9076	ea50daa39c6c4a0574d509aa68b507b7_5482	4cb190364575d751463119e92857d019_8713	E_coli_7_02366	4840fb5d2d4897d217f65ba1ef1b22a7_9033
rpsO		30S ribosomal protein S15	6	6	1	4	257				269	269	269	81f6f292c45231c81cff920b572a826a_1091	d5a5a6aae91cabb186fe594057e8ea03_1084	ea50daa39c6c4a0574d509aa68b507b7_7250	4cb190364575d751463119e92857d019_1101	E_coli_7_03586	4840fb5d2d4897d217f65ba1ef1b22a7_1650
manY		PTS mannose transporter subunit IIC	6	6	1	4	2927				800	800	800	81f6f292c45231c81cff920b572a826a_4062	d5a5a6aae91cabb186fe594057e8ea03_4122	ea50daa39c6c4a0574d509aa68b507b7_816	4cb190364575d751463119e92857d019_3899	E_coli_7_00582	4840fb5d2d4897d217f65ba1ef1b22a7_4505
ydhR		monooxygenase	6	6	1	4	3082				305	305	305	81f6f292c45231c81cff920b572a826a_4372	d5a5a6aae91cabb186fe594057e8ea03_4420	ea50daa39c6c4a0574d509aa68b507b7_1132	4cb190364575d751463119e92857d019_4213	E_coli_7_00734	4840fb5d2d4897d217f65ba1ef1b22a7_4823
ihfB		integration host factor subunit beta	6	6	1	4	3452				284	284	284	81f6f292c45231c81cff920b572a826a_5786	d5a5a6aae91cabb186fe594057e8ea03_6134	ea50daa39c6c4a0574d509aa68b507b7_2756	4cb190364575d751463119e92857d019_5760	E_coli_7_03132	4840fb5d2d4897d217f65ba1ef1b22a7_6351
bioP		biotin transporter	6	6	1	4	1146				899	899	899	81f6f292c45231c81cff920b572a826a_9038	d5a5a6aae91cabb186fe594057e8ea03_9471	ea50daa39c6c4a0574d509aa68b507b7_5877	4cb190364575d751463119e92857d019_9112	E_coli_7_04277	4840fb5d2d4897d217f65ba1ef1b22a7_299
fabZ		3-hydroxyacyl-ACP dehydratase FabZ	6	6	1	4	2544				455	455	455	81f6f292c45231c81cff920b572a826a_7350	d5a5a6aae91cabb186fe594057e8ea03_7667	ea50daa39c6c4a0574d509aa68b507b7_4248	4cb190364575d751463119e92857d019_7276	E_coli_7_01246	4840fb5d2d4897d217f65ba1ef1b22a7_7918
rstA		two-component system response regulator RstA	6	6	1	4	3141				719	719	719	81f6f292c45231c81cff920b572a826a_4496	d5a5a6aae91cabb186fe594057e8ea03_4544	ea50daa39c6c4a0574d509aa68b507b7_1256	4cb190364575d751463119e92857d019_4337	E_coli_7_00795	4840fb5d2d4897d217f65ba1ef1b22a7_4947
bioB		biotin synthase BioB	6	6	1	4	92				1040	1040	1040	81f6f292c45231c81cff920b572a826a_6074	d5a5a6aae91cabb186fe594057e8ea03_6420	ea50daa39c6c4a0574d509aa68b507b7_3040	4cb190364575d751463119e92857d019_6048	E_coli_7_03277	4840fb5d2d4897d217f65ba1ef1b22a7_6639
cutA		divalent cation tolerance protein CutA	6	6	1	4	1569				338	338	338	81f6f292c45231c81cff920b572a826a_8333	d5a5a6aae91cabb186fe594057e8ea03_8548	ea50daa39c6c4a0574d509aa68b507b7_5110	4cb190364575d751463119e92857d019_8409	E_coli_7_02238	4840fb5d2d4897d217f65ba1ef1b22a7_8779
rpsD		30S ribosomal protein S4	6	6	1	4	140				620	620	620	81f6f292c45231c81cff920b572a826a_832	d5a5a6aae91cabb186fe594057e8ea03_829	ea50daa39c6c4a0574d509aa68b507b7_6995	4cb190364575d751463119e92857d019_842	E_coli_7_01597	4840fb5d2d4897d217f65ba1ef1b22a7_1395
WP_000867987.1		CatB-related O-acetyltransferase	6	6	1	4	4692				809	809	809	81f6f292c45231c81cff920b572a826a_4812	d5a5a6aae91cabb186fe594057e8ea03_4943	ea50daa39c6c4a0574d509aa68b507b7_1660	4cb190364575d751463119e92857d019_4783	E_coli_7_01885	4840fb5d2d4897d217f65ba1ef1b22a7_5359
mntH		Nramp family divalent metal transporter	6	6	1	4	4033				1238	1238	1238	81f6f292c45231c81cff920b572a826a_2742	d5a5a6aae91cabb186fe594057e8ea03_2841	ea50daa39c6c4a0574d509aa68b507b7_8999	4cb190364575d751463119e92857d019_2749	E_coli_7_00015	4840fb5d2d4897d217f65ba1ef1b22a7_3333
cydB		cytochrome d ubiquinol oxidase subunit II	6	6	1	4	57				1139	1139	1139	81f6f292c45231c81cff920b572a826a_6168	d5a5a6aae91cabb186fe594057e8ea03_6514	ea50daa39c6c4a0574d509aa68b507b7_3134	4cb190364575d751463119e92857d019_6142	E_coli_7_03235	4840fb5d2d4897d217f65ba1ef1b22a7_6730
yjcE		Na+/H+ antiporter	6	6	1	4	1500				1649	1649	1649	81f6f292c45231c81cff920b572a826a_8470	d5a5a6aae91cabb186fe594057e8ea03_8842	ea50daa39c6c4a0574d509aa68b507b7_5247	4cb190364575d751463119e92857d019_8546	E_coli_7_02307	4840fb5d2d4897d217f65ba1ef1b22a7_8916
WP_000184091.1		hypothetical protein	6	6	1	4	6202				218	218	218	81f6f292c45231c81cff920b572a826a_1788	d5a5a6aae91cabb186fe594057e8ea03_1883	ea50daa39c6c4a0574d509aa68b507b7_8045	4cb190364575d751463119e92857d019_1800	E_coli_7_02418	4840fb5d2d4897d217f65ba1ef1b22a7_2341
trhO		rhodanese-related sulfurtransferase	6	6	1	4	4345				1052	1052	1052	81f6f292c45231c81cff920b572a826a_5513	d5a5a6aae91cabb186fe594057e8ea03_5764	ea50daa39c6c4a0574d509aa68b507b7_2471	4cb190364575d751463119e92857d019_5490	E_coli_7_03845	4840fb5d2d4897d217f65ba1ef1b22a7_6058
pldA		phospholipase A	6	6	1	4	1152				869	869	869	81f6f292c45231c81cff920b572a826a_9050	d5a5a6aae91cabb186fe594057e8ea03_9483	ea50daa39c6c4a0574d509aa68b507b7_5889	4cb190364575d751463119e92857d019_9124	E_coli_7_04271	4840fb5d2d4897d217f65ba1ef1b22a7_311
mdtJ		multidrug/spermidine efflux SMR transporter subunit MdtJ	6	6	1	4	3149				302	365	354	81f6f292c45231c81cff920b572a826a_4514	d5a5a6aae91cabb186fe594057e8ea03_4562	ea50daa39c6c4a0574d509aa68b507b7_1272	4cb190364575d751463119e92857d019_4353	E_coli_7_00803	4840fb5d2d4897d217f65ba1ef1b22a7_4963
yjfI		DUF2170 family protein	6	6	1	4	1611				401	401	401	81f6f292c45231c81cff920b572a826a_8240	d5a5a6aae91cabb186fe594057e8ea03_8449	ea50daa39c6c4a0574d509aa68b507b7_5017	4cb190364575d751463119e92857d019_8316	E_coli_7_02194	4840fb5d2d4897d217f65ba1ef1b22a7_8686
fruK		1-phosphofructokinase	6	6	1	4	4252				938	938	938	81f6f292c45231c81cff920b572a826a_3174	d5a5a6aae91cabb186fe594057e8ea03_3243	ea50daa39c6c4a0574d509aa68b507b7_9397	4cb190364575d751463119e92857d019_3147	E_coli_7_00219	4840fb5d2d4897d217f65ba1ef1b22a7_3733
rsmS		pleiotropic regulatory protein RsmS	6	6	1	4	5584				161	161	161	81f6f292c45231c81cff920b572a826a_6661	d5a5a6aae91cabb186fe594057e8ea03_7022	ea50daa39c6c4a0574d509aa68b507b7_3629	4cb190364575d751463119e92857d019_6635	E_coli_7_01461	4840fb5d2d4897d217f65ba1ef1b22a7_7213
ydcY		YdcY family protein	6	6	1	4	4695				233	233	233	81f6f292c45231c81cff920b572a826a_4806	d5a5a6aae91cabb186fe594057e8ea03_4937	ea50daa39c6c4a0574d509aa68b507b7_1654	4cb190364575d751463119e92857d019_4777	E_coli_7_01883	4840fb5d2d4897d217f65ba1ef1b22a7_5353
pabB		aminodeoxychorismate synthase component 1	6	6	1	4	2933				1361	1361	1361	81f6f292c45231c81cff920b572a826a_4074	d5a5a6aae91cabb186fe594057e8ea03_4134	ea50daa39c6c4a0574d509aa68b507b7_828	4cb190364575d751463119e92857d019_3911	E_coli_7_00589	4840fb5d2d4897d217f65ba1ef1b22a7_4517
umuD		translesion error-prone DNA polymerase V autoproteolytic subunit	6	6	1	4	4454				419	419	419	81f6f292c45231c81cff920b572a826a_5299	d5a5a6aae91cabb186fe594057e8ea03_5432	ea50daa39c6c4a0574d509aa68b507b7_2251	4cb190364575d751463119e92857d019_5272	E_coli_7_02119	4840fb5d2d4897d217f65ba1ef1b22a7_5840
WP_001012978.1		helix-turn-helix transcriptional regulator	6	6	1	4	250				953	953	953	81f6f292c45231c81cff920b572a826a_1074	d5a5a6aae91cabb186fe594057e8ea03_1067	ea50daa39c6c4a0574d509aa68b507b7_7233	4cb190364575d751463119e92857d019_1084	E_coli_7_03594	4840fb5d2d4897d217f65ba1ef1b22a7_1633
rplA		50S ribosomal protein L1	6	6	1	4	710				704	704	704	81f6f292c45231c81cff920b572a826a_8700	d5a5a6aae91cabb186fe594057e8ea03_9139	ea50daa39c6c4a0574d509aa68b507b7_5545	4cb190364575d751463119e92857d019_8774	E_coli_7_04475	4840fb5d2d4897d217f65ba1ef1b22a7_9096
group_3488	dmsB	dimethylsulfoxide reductase subunit B	6	6	1	4	3435				617	617	617	81f6f292c45231c81cff920b572a826a_5820	d5a5a6aae91cabb186fe594057e8ea03_6168	ea50daa39c6c4a0574d509aa68b507b7_2790	4cb190364575d751463119e92857d019_5794	E_coli_7_03149	4840fb5d2d4897d217f65ba1ef1b22a7_6385
yidL		AraC family transcriptional regulator	6	6	1	4	5210				893	893	893	81f6f292c45231c81cff920b572a826a_46	d5a5a6aae91cabb186fe594057e8ea03_46	ea50daa39c6c4a0574d509aa68b507b7_6228	4cb190364575d751463119e92857d019_46	E_coli_7_02927	4840fb5d2d4897d217f65ba1ef1b22a7_620
WP_001297116.1		hypothetical protein	6	6	1	4	4551				167	167	167	81f6f292c45231c81cff920b572a826a_5094	d5a5a6aae91cabb186fe594057e8ea03_5231	ea50daa39c6c4a0574d509aa68b507b7_1938	4cb190364575d751463119e92857d019_5065	E_coli_7_02020	4840fb5d2d4897d217f65ba1ef1b22a7_5643
fliG		flagellar motor switch protein FliG	6	6	1	4	2810				995	995	995	81f6f292c45231c81cff920b572a826a_3823	d5a5a6aae91cabb186fe594057e8ea03_3871	ea50daa39c6c4a0574d509aa68b507b7_537	4cb190364575d751463119e92857d019_3660	E_coli_7_00452	4840fb5d2d4897d217f65ba1ef1b22a7_4250
sucD		succinate--CoA ligase subunit alpha	6	6	1	4	52				869	869	869	81f6f292c45231c81cff920b572a826a_6178	d5a5a6aae91cabb186fe594057e8ea03_6524	ea50daa39c6c4a0574d509aa68b507b7_3144	4cb190364575d751463119e92857d019_6152	E_coli_7_03230	4840fb5d2d4897d217f65ba1ef1b22a7_6740
rppH		RNA pyrophosphohydrolase	6	6	1	4	6227				530	530	530	81f6f292c45231c81cff920b572a826a_1836	d5a5a6aae91cabb186fe594057e8ea03_1933	ea50daa39c6c4a0574d509aa68b507b7_8093	4cb190364575d751463119e92857d019_1848	E_coli_7_02391	4840fb5d2d4897d217f65ba1ef1b22a7_2389
fumD		fumarate hydratase FumD	6	6	1	4	3074				209	209	209	81f6f292c45231c81cff920b572a826a_4356	d5a5a6aae91cabb186fe594057e8ea03_4402	ea50daa39c6c4a0574d509aa68b507b7_1116	4cb190364575d751463119e92857d019_4197	E_coli_7_00726	4840fb5d2d4897d217f65ba1ef1b22a7_4807
yggU		DUF167 family protein YggU	6	6	1	4	409				290	290	290	81f6f292c45231c81cff920b572a826a_1553	d5a5a6aae91cabb186fe594057e8ea03_1644	ea50daa39c6c4a0574d509aa68b507b7_7808	4cb190364575d751463119e92857d019_1567	E_coli_7_02530	4840fb5d2d4897d217f65ba1ef1b22a7_2110
ybaK		Cys-tRNA(Pro)/Cys-tRNA(Cys) deacylase YbaK	6	6	1	4	5600				479	479	479	81f6f292c45231c81cff920b572a826a_6630	d5a5a6aae91cabb186fe594057e8ea03_6991	ea50daa39c6c4a0574d509aa68b507b7_3598	4cb190364575d751463119e92857d019_6604	E_coli_7_01446	4840fb5d2d4897d217f65ba1ef1b22a7_7182
yaaX		DUF2502 domain-containing protein	6	6	1	4	5895				296	296	296	81f6f292c45231c81cff920b572a826a_7697	d5a5a6aae91cabb186fe594057e8ea03_8023	ea50daa39c6c4a0574d509aa68b507b7_4609	4cb190364575d751463119e92857d019_7625	E_coli_7_01077	4840fb5d2d4897d217f65ba1ef1b22a7_8269
pntB		Re/Si-specific NAD(P)(+) transhydrogenase subunit beta	6	6	1	4	3147				1388	1388	1388	81f6f292c45231c81cff920b572a826a_4510	d5a5a6aae91cabb186fe594057e8ea03_4556	ea50daa39c6c4a0574d509aa68b507b7_1268	4cb190364575d751463119e92857d019_4349	E_coli_7_00801	4840fb5d2d4897d217f65ba1ef1b22a7_4959
WP_000758915.1		hypothetical protein	6	6	1	4	6105				731	731	731	81f6f292c45231c81cff920b572a826a_1581	d5a5a6aae91cabb186fe594057e8ea03_1676	ea50daa39c6c4a0574d509aa68b507b7_7838	4cb190364575d751463119e92857d019_1595	E_coli_7_02516	4840fb5d2d4897d217f65ba1ef1b22a7_2138
clcB		voltage-gated ClC-type chloride channel ClcB	6	6	1	4	3158				1256	1292	1286	81f6f292c45231c81cff920b572a826a_4532	d5a5a6aae91cabb186fe594057e8ea03_4582	ea50daa39c6c4a0574d509aa68b507b7_1290	4cb190364575d751463119e92857d019_4371	E_coli_7_00811	4840fb5d2d4897d217f65ba1ef1b22a7_4981
glyA		serine hydroxymethyltransferase	6	6	1	4	3864				1253	1253	1253	81f6f292c45231c81cff920b572a826a_2421	d5a5a6aae91cabb186fe594057e8ea03_2522	ea50daa39c6c4a0574d509aa68b507b7_8654	4cb190364575d751463119e92857d019_2425	E_coli_7_03423	4840fb5d2d4897d217f65ba1ef1b22a7_2980
mglC		galactose/methyl galactoside ABC transporter permease MglC	6	6	1	4	4272				1010	1010	1010	81f6f292c45231c81cff920b572a826a_3214	d5a5a6aae91cabb186fe594057e8ea03_3283	ea50daa39c6c4a0574d509aa68b507b7_9437	4cb190364575d751463119e92857d019_3187	E_coli_7_00239	4840fb5d2d4897d217f65ba1ef1b22a7_3773
lamB		maltoporin LamB	6	6	1	4	788				1340	1340	1340	81f6f292c45231c81cff920b572a826a_8530	d5a5a6aae91cabb186fe594057e8ea03_9022	ea50daa39c6c4a0574d509aa68b507b7_5428	4cb190364575d751463119e92857d019_8606	E_coli_7_02339	4840fb5d2d4897d217f65ba1ef1b22a7_8976
moaE		molybdopterin synthase catalytic subunit MoaE	6	6	1	4	102				452	452	452	81f6f292c45231c81cff920b572a826a_6053	d5a5a6aae91cabb186fe594057e8ea03_6399	ea50daa39c6c4a0574d509aa68b507b7_3019	4cb190364575d751463119e92857d019_6027	E_coli_7_03287	4840fb5d2d4897d217f65ba1ef1b22a7_6618
oppD		murein tripeptide/oligopeptide ABC transporter ATP-binding protein OppD	6	6	1	4	4517				1013	1013	1013	81f6f292c45231c81cff920b572a826a_5165	d5a5a6aae91cabb186fe594057e8ea03_5296	ea50daa39c6c4a0574d509aa68b507b7_2120	4cb190364575d751463119e92857d019_5136	E_coli_7_02053	4840fb5d2d4897d217f65ba1ef1b22a7_5708
ubiE		bifunctional demethylmenaquinone methyltransferase/2-methoxy-6-polyprenyl-1,4-benzoquinol methylase UbiE	6	6	1	4	1140				755	755	755	81f6f292c45231c81cff920b572a826a_9026	d5a5a6aae91cabb186fe594057e8ea03_9459	ea50daa39c6c4a0574d509aa68b507b7_5865	4cb190364575d751463119e92857d019_9100	E_coli_7_04283	4840fb5d2d4897d217f65ba1ef1b22a7_287
rnc		ribonuclease III	6	6	1	4	3847				680	680	680	81f6f292c45231c81cff920b572a826a_2387	d5a5a6aae91cabb186fe594057e8ea03_2488	ea50daa39c6c4a0574d509aa68b507b7_8620	4cb190364575d751463119e92857d019_2391	E_coli_7_03407	4840fb5d2d4897d217f65ba1ef1b22a7_2946
hyaE		hydrogenase-1 operon protein HyaE	6	6	1	4	3515				398	398	398	81f6f292c45231c81cff920b572a826a_5657	d5a5a6aae91cabb186fe594057e8ea03_6005	ea50daa39c6c4a0574d509aa68b507b7_2627	4cb190364575d751463119e92857d019_5631	E_coli_7_03068	4840fb5d2d4897d217f65ba1ef1b22a7_6222
infA		translation initiation factor IF-1	6	6	1	4	3424				218	218	218	81f6f292c45231c81cff920b572a826a_5842	d5a5a6aae91cabb186fe594057e8ea03_6190	ea50daa39c6c4a0574d509aa68b507b7_2812	4cb190364575d751463119e92857d019_5816	E_coli_7_03160	4840fb5d2d4897d217f65ba1ef1b22a7_6407
ybaT		APC family permease	6	6	1	4	5606				1292	1292	1292	81f6f292c45231c81cff920b572a826a_6618	d5a5a6aae91cabb186fe594057e8ea03_6981	ea50daa39c6c4a0574d509aa68b507b7_3588	4cb190364575d751463119e92857d019_6592	E_coli_7_01440	4840fb5d2d4897d217f65ba1ef1b22a7_7172
ynfC		YnfC family lipoprotein	6	6	1	4	3165				710	746	716	81f6f292c45231c81cff920b572a826a_4546	d5a5a6aae91cabb186fe594057e8ea03_4596	ea50daa39c6c4a0574d509aa68b507b7_1304	4cb190364575d751463119e92857d019_4385	E_coli_7_00818	4840fb5d2d4897d217f65ba1ef1b22a7_4995
lptE		LPS assembly lipoprotein LptE	6	6	1	4	5373				581	581	581	81f6f292c45231c81cff920b572a826a_6377	d5a5a6aae91cabb186fe594057e8ea03_6697	ea50daa39c6c4a0574d509aa68b507b7_3317	4cb190364575d751463119e92857d019_6351	E_coli_7_01321	4840fb5d2d4897d217f65ba1ef1b22a7_6911
trmD		tRNA (guanosine(37)-N1)-methyltransferase TrmD	6	6	1	4	4294				767	767	767	81f6f292c45231c81cff920b572a826a_2300	d5a5a6aae91cabb186fe594057e8ea03_2399	ea50daa39c6c4a0574d509aa68b507b7_8535	4cb190364575d751463119e92857d019_2304	E_coli_7_02598	4840fb5d2d4897d217f65ba1ef1b22a7_2859
fdoI		formate dehydrogenase cytochrome b556 subunit	6	6	1	4	2074				635	635	635	81f6f292c45231c81cff920b572a826a_8897	d5a5a6aae91cabb186fe594057e8ea03_9336	ea50daa39c6c4a0574d509aa68b507b7_5738	4cb190364575d751463119e92857d019_8975	E_coli_7_04014	4840fb5d2d4897d217f65ba1ef1b22a7_160
acpP		acyl carrier protein	6	6	1	4	4383				236	236	236	81f6f292c45231c81cff920b572a826a_5437	d5a5a6aae91cabb186fe594057e8ea03_5688	ea50daa39c6c4a0574d509aa68b507b7_2395	4cb190364575d751463119e92857d019_5414	E_coli_7_03807	4840fb5d2d4897d217f65ba1ef1b22a7_5982
tisB		type I toxin-antitoxin system toxin TisB	6	6	1	4	5219				89	89	89	81f6f292c45231c81cff920b572a826a_64	d5a5a6aae91cabb186fe594057e8ea03_64	ea50daa39c6c4a0574d509aa68b507b7_6244	4cb190364575d751463119e92857d019_64	E_coli_7_02919	4840fb5d2d4897d217f65ba1ef1b22a7_638
plsY		glycerol-3-phosphate 1-O-acyltransferase PlsY	6	6	1	4	5966				617	617	617	81f6f292c45231c81cff920b572a826a_1315	d5a5a6aae91cabb186fe594057e8ea03_1406	ea50daa39c6c4a0574d509aa68b507b7_7472	4cb190364575d751463119e92857d019_1327	E_coli_7_03912	4840fb5d2d4897d217f65ba1ef1b22a7_1876
dtd		D-aminoacyl-tRNA deacylase	6	6	1	4	2083				437	437	437	81f6f292c45231c81cff920b572a826a_8913	d5a5a6aae91cabb186fe594057e8ea03_9352	ea50daa39c6c4a0574d509aa68b507b7_5756	4cb190364575d751463119e92857d019_8987	E_coli_7_04004	4840fb5d2d4897d217f65ba1ef1b22a7_176
clpP		ATP-dependent Clp endopeptidase proteolytic subunit ClpP	6	6	1	4	5556				623	623	623	81f6f292c45231c81cff920b572a826a_6720	d5a5a6aae91cabb186fe594057e8ea03_7081	ea50daa39c6c4a0574d509aa68b507b7_3688	4cb190364575d751463119e92857d019_6694	E_coli_7_01489	4840fb5d2d4897d217f65ba1ef1b22a7_7272
cyoB		cytochrome o ubiquinol oxidase subunit I	6	6	1	4	5550				1991	1991	1991	81f6f292c45231c81cff920b572a826a_6732	d5a5a6aae91cabb186fe594057e8ea03_7093	ea50daa39c6c4a0574d509aa68b507b7_3700	4cb190364575d751463119e92857d019_6706	E_coli_7_01495	4840fb5d2d4897d217f65ba1ef1b22a7_7284
yggL		YggL family protein	6	6	1	4	400				326	326	326	81f6f292c45231c81cff920b572a826a_1535	d5a5a6aae91cabb186fe594057e8ea03_1632	ea50daa39c6c4a0574d509aa68b507b7_7796	4cb190364575d751463119e92857d019_1555	E_coli_7_02539	4840fb5d2d4897d217f65ba1ef1b22a7_2098
ydfJ		MHS family MFS transporter YdfJ	6	6	1	4	3195				1283	1367	1311	81f6f292c45231c81cff920b572a826a_4558	d5a5a6aae91cabb186fe594057e8ea03_4706	ea50daa39c6c4a0574d509aa68b507b7_1432	4cb190364575d751463119e92857d019_4521	E_coli_7_00824	4840fb5d2d4897d217f65ba1ef1b22a7_5125
yciU		HI1450 family dsDNA-mimic protein	6	6	1	4	4519				329	329	329	81f6f292c45231c81cff920b572a826a_5161	d5a5a6aae91cabb186fe594057e8ea03_5292	ea50daa39c6c4a0574d509aa68b507b7_2116	4cb190364575d751463119e92857d019_5132	E_coli_7_02051	4840fb5d2d4897d217f65ba1ef1b22a7_5704
ccmD		heme exporter protein CcmD	6	6	1	4	4225				209	209	209	81f6f292c45231c81cff920b572a826a_3115	d5a5a6aae91cabb186fe594057e8ea03_3184	ea50daa39c6c4a0574d509aa68b507b7_9338	4cb190364575d751463119e92857d019_3088	E_coli_7_00190	4840fb5d2d4897d217f65ba1ef1b22a7_3674
maoP		macrodomain Ori organization protein MaoP	6	6	1	4	1230				338	338	338	81f6f292c45231c81cff920b572a826a_9170	d5a5a6aae91cabb186fe594057e8ea03_9605	ea50daa39c6c4a0574d509aa68b507b7_6045	4cb190364575d751463119e92857d019_9244	E_coli_7_04217	4840fb5d2d4897d217f65ba1ef1b22a7_439
nikA		nickel ABC transporter substrate-binding protein	6	6	1	4	5010				1574	1574	1574	81f6f292c45231c81cff920b572a826a_484	d5a5a6aae91cabb186fe594057e8ea03_491	ea50daa39c6c4a0574d509aa68b507b7_6669	4cb190364575d751463119e92857d019_482	E_coli_7_01782	4840fb5d2d4897d217f65ba1ef1b22a7_1067
fadR		fatty acid metabolism transcriptional regulator FadR	6	6	1	4	4458				719	719	719	81f6f292c45231c81cff920b572a826a_5291	d5a5a6aae91cabb186fe594057e8ea03_5424	ea50daa39c6c4a0574d509aa68b507b7_2243	4cb190364575d751463119e92857d019_5264	E_coli_7_02115	4840fb5d2d4897d217f65ba1ef1b22a7_5832
lpcA		D-sedoheptulose 7-phosphate isomerase	6	6	1	4	5754				578	578	578	81f6f292c45231c81cff920b572a826a_7195	d5a5a6aae91cabb186fe594057e8ea03_7516	ea50daa39c6c4a0574d509aa68b507b7_4089	4cb190364575d751463119e92857d019_7121	E_coli_7_04200	4840fb5d2d4897d217f65ba1ef1b22a7_7763
dkgA		2,5-didehydrogluconate reductase DkgA	6	6	1	4	6013				827	827	827	81f6f292c45231c81cff920b572a826a_1402	d5a5a6aae91cabb186fe594057e8ea03_1493	ea50daa39c6c4a0574d509aa68b507b7_7559	4cb190364575d751463119e92857d019_1422	E_coli_7_03953	4840fb5d2d4897d217f65ba1ef1b22a7_1963
oppC		oligopeptide ABC transporter permease OppC	6	6	1	4	4516				908	908	908	81f6f292c45231c81cff920b572a826a_5167	d5a5a6aae91cabb186fe594057e8ea03_5298	ea50daa39c6c4a0574d509aa68b507b7_2122	4cb190364575d751463119e92857d019_5138	E_coli_7_02054	4840fb5d2d4897d217f65ba1ef1b22a7_5710
oppB		oligopeptide ABC transporter permease OppB	6	6	1	4	4515				920	920	920	81f6f292c45231c81cff920b572a826a_5169	d5a5a6aae91cabb186fe594057e8ea03_5300	ea50daa39c6c4a0574d509aa68b507b7_2124	4cb190364575d751463119e92857d019_5140	E_coli_7_02055	4840fb5d2d4897d217f65ba1ef1b22a7_5712
zapD		cell division protein ZapD	6	6	1	4	481				743	743	743	81f6f292c45231c81cff920b572a826a_7506	d5a5a6aae91cabb186fe594057e8ea03_7828	ea50daa39c6c4a0574d509aa68b507b7_4402	4cb190364575d751463119e92857d019_7434	E_coli_7_01169	4840fb5d2d4897d217f65ba1ef1b22a7_8074
ydeJ		2-oxo-tetronate isomerase	6	6	1	4	3201				518	518	518	81f6f292c45231c81cff920b572a826a_4570	d5a5a6aae91cabb186fe594057e8ea03_4723	ea50daa39c6c4a0574d509aa68b507b7_1444	4cb190364575d751463119e92857d019_4533	E_coli_7_00830	4840fb5d2d4897d217f65ba1ef1b22a7_5137
yhfG		YhfG family protein	6	6	1	4	4893				167	167	167	81f6f292c45231c81cff920b572a826a_698	d5a5a6aae91cabb186fe594057e8ea03_723	ea50daa39c6c4a0574d509aa68b507b7_6889	4cb190364575d751463119e92857d019_708	E_coli_7_01664	4840fb5d2d4897d217f65ba1ef1b22a7_1289
pdhR		pyruvate dehydrogenase complex transcriptional repressor PdhR	6	6	1	4	470				764	764	764	81f6f292c45231c81cff920b572a826a_7484	d5a5a6aae91cabb186fe594057e8ea03_7806	ea50daa39c6c4a0574d509aa68b507b7_4380	4cb190364575d751463119e92857d019_7412	E_coli_7_01179	4840fb5d2d4897d217f65ba1ef1b22a7_8052
rpmC		50S ribosomal protein L29	6	6	1	4	124				191	191	191	81f6f292c45231c81cff920b572a826a_800	d5a5a6aae91cabb186fe594057e8ea03_797	ea50daa39c6c4a0574d509aa68b507b7_6963	4cb190364575d751463119e92857d019_810	E_coli_7_01613	4840fb5d2d4897d217f65ba1ef1b22a7_1363
ygaH		L-valine transporter subunit YgaH	6	6	1	4	1100				335	335	335	81f6f292c45231c81cff920b572a826a_2210	d5a5a6aae91cabb186fe594057e8ea03_2311	ea50daa39c6c4a0574d509aa68b507b7_8419	4cb190364575d751463119e92857d019_2211	E_coli_7_02643	4840fb5d2d4897d217f65ba1ef1b22a7_2749
ydcZ		DMT family transporter	6	6	1	4	4696				449	449	449	81f6f292c45231c81cff920b572a826a_4804	d5a5a6aae91cabb186fe594057e8ea03_4935	ea50daa39c6c4a0574d509aa68b507b7_1652	4cb190364575d751463119e92857d019_4775	E_coli_7_01882	4840fb5d2d4897d217f65ba1ef1b22a7_5351
ygbI		DNA-binding transcriptional repressor YgbI	6	6	1	4	1049				767	767	767	81f6f292c45231c81cff920b572a826a_2095	d5a5a6aae91cabb186fe594057e8ea03_2196	ea50daa39c6c4a0574d509aa68b507b7_8308	4cb190364575d751463119e92857d019_2100	E_coli_7_02699	4840fb5d2d4897d217f65ba1ef1b22a7_2634
speD		adenosylmethionine decarboxylase	6	6	1	4	463				794	794	794	81f6f292c45231c81cff920b572a826a_7470	d5a5a6aae91cabb186fe594057e8ea03_7792	ea50daa39c6c4a0574d509aa68b507b7_4366	4cb190364575d751463119e92857d019_7398	E_coli_7_01186	4840fb5d2d4897d217f65ba1ef1b22a7_8038
carA		glutamine-hydrolyzing carbamoyl-phosphate synthase small subunit	6	6	1	4	440				1148	1148	1148	81f6f292c45231c81cff920b572a826a_7647	d5a5a6aae91cabb186fe594057e8ea03_7967	ea50daa39c6c4a0574d509aa68b507b7_4553	4cb190364575d751463119e92857d019_7573	E_coli_7_01102	4840fb5d2d4897d217f65ba1ef1b22a7_8219
gltX		glutamate--tRNA ligase	6	6	1	4	4028				1415	1415	1415	81f6f292c45231c81cff920b572a826a_2726	d5a5a6aae91cabb186fe594057e8ea03_2825	ea50daa39c6c4a0574d509aa68b507b7_8983	4cb190364575d751463119e92857d019_2733	E_coli_7_00008	4840fb5d2d4897d217f65ba1ef1b22a7_3317
kdgK		2-dehydro-3-deoxygluconokinase	6	6	1	4	5065				929	929	929	81f6f292c45231c81cff920b572a826a_378	d5a5a6aae91cabb186fe594057e8ea03_385	ea50daa39c6c4a0574d509aa68b507b7_6567	4cb190364575d751463119e92857d019_376	E_coli_7_01833	4840fb5d2d4897d217f65ba1ef1b22a7_961
ydeI		YdeI family stress tolerance OB fold protein	6	6	1	4	3202				392	392	392	81f6f292c45231c81cff920b572a826a_4572	d5a5a6aae91cabb186fe594057e8ea03_4725	ea50daa39c6c4a0574d509aa68b507b7_1446	4cb190364575d751463119e92857d019_4535	E_coli_7_00831	4840fb5d2d4897d217f65ba1ef1b22a7_5139
lptA		lipopolysaccharide ABC transporter substrate-binding protein LptA	6	6	1	4	224				557	557	557	81f6f292c45231c81cff920b572a826a_1019	d5a5a6aae91cabb186fe594057e8ea03_1012	ea50daa39c6c4a0574d509aa68b507b7_7178	4cb190364575d751463119e92857d019_1029	E_coli_7_03621	4840fb5d2d4897d217f65ba1ef1b22a7_1578
ubiB		ubiquinone biosynthesis regulatory protein kinase UbiB	6	6	1	4	1138				1640	1640	1640	81f6f292c45231c81cff920b572a826a_9022	d5a5a6aae91cabb186fe594057e8ea03_9455	ea50daa39c6c4a0574d509aa68b507b7_5861	4cb190364575d751463119e92857d019_9096	E_coli_7_04285	4840fb5d2d4897d217f65ba1ef1b22a7_283
recX		recombination regulator RecX	6	6	1	4	1090				500	500	500	81f6f292c45231c81cff920b572a826a_2175	d5a5a6aae91cabb186fe594057e8ea03_2276	ea50daa39c6c4a0574d509aa68b507b7_8384	4cb190364575d751463119e92857d019_2176	E_coli_7_02659	4840fb5d2d4897d217f65ba1ef1b22a7_2714
fabI		enoyl-ACP reductase FabI	6	6	1	4	4568				788	788	788	81f6f292c45231c81cff920b572a826a_5060	d5a5a6aae91cabb186fe594057e8ea03_5197	ea50daa39c6c4a0574d509aa68b507b7_1906	4cb190364575d751463119e92857d019_5031	E_coli_7_02006	4840fb5d2d4897d217f65ba1ef1b22a7_5609
gltL		glutamate/aspartate ABC transporter ATP-binding protein GltL	6	6	1	4	5362				725	725	725	81f6f292c45231c81cff920b572a826a_6355	d5a5a6aae91cabb186fe594057e8ea03_6675	ea50daa39c6c4a0574d509aa68b507b7_3295	4cb190364575d751463119e92857d019_6329	E_coli_7_01310	4840fb5d2d4897d217f65ba1ef1b22a7_6889
sugE		quaternary ammonium compound efflux SMR transporter SugE	6	6	1	4	1582				317	317	317	81f6f292c45231c81cff920b572a826a_8307	d5a5a6aae91cabb186fe594057e8ea03_8520	ea50daa39c6c4a0574d509aa68b507b7_5084	4cb190364575d751463119e92857d019_8383	E_coli_7_02225	4840fb5d2d4897d217f65ba1ef1b22a7_8753
mepK		YcbK family protein	6	6	1	4	3466				548	548	548	81f6f292c45231c81cff920b572a826a_5758	d5a5a6aae91cabb186fe594057e8ea03_6106	ea50daa39c6c4a0574d509aa68b507b7_2728	4cb190364575d751463119e92857d019_5732	E_coli_7_03118	4840fb5d2d4897d217f65ba1ef1b22a7_6323
srlA		PTS glucitol/sorbitol transporter subunit IIC	6	6	1	4	1086				563	563	563	81f6f292c45231c81cff920b572a826a_2167	d5a5a6aae91cabb186fe594057e8ea03_2268	ea50daa39c6c4a0574d509aa68b507b7_8376	4cb190364575d751463119e92857d019_2168	E_coli_7_02663	4840fb5d2d4897d217f65ba1ef1b22a7_2706
yegP		YegP family protein	6	6	1	4	3726				332	332	332	81f6f292c45231c81cff920b572a826a_3423	d5a5a6aae91cabb186fe594057e8ea03_3414	ea50daa39c6c4a0574d509aa68b507b7_75	4cb190364575d751463119e92857d019_3396	E_coli_7_00301	4840fb5d2d4897d217f65ba1ef1b22a7_3984
bepA		beta-barrel assembly-enhancing protease	6	6	1	4	3937				1463	1463	1463	81f6f292c45231c81cff920b572a826a_2539	d5a5a6aae91cabb186fe594057e8ea03_2638	ea50daa39c6c4a0574d509aa68b507b7_8770	4cb190364575d751463119e92857d019_2543	E_coli_7_03481	4840fb5d2d4897d217f65ba1ef1b22a7_3130
ytfP		gamma-glutamylcyclotransferase	6	6	1	4	647				341	341	341	81f6f292c45231c81cff920b572a826a_8152	d5a5a6aae91cabb186fe594057e8ea03_8353	ea50daa39c6c4a0574d509aa68b507b7_4929	4cb190364575d751463119e92857d019_8230	E_coli_7_02152	4840fb5d2d4897d217f65ba1ef1b22a7_8592
coaD		pantetheine-phosphate adenylyltransferase	6	6	1	4	5257				479	479	479	81f6f292c45231c81cff920b572a826a_149	d5a5a6aae91cabb186fe594057e8ea03_145	ea50daa39c6c4a0574d509aa68b507b7_6327	4cb190364575d751463119e92857d019_147	E_coli_7_02879	4840fb5d2d4897d217f65ba1ef1b22a7_723
hycB		formate hydrogenlyase subunit HycB	6	6	1	4	1061				611	611	611	81f6f292c45231c81cff920b572a826a_2119	d5a5a6aae91cabb186fe594057e8ea03_2220	ea50daa39c6c4a0574d509aa68b507b7_8332	4cb190364575d751463119e92857d019_2124	E_coli_7_02687	4840fb5d2d4897d217f65ba1ef1b22a7_2658
dpaA		peptidoglycan meso-diaminopimelic acid protein amidase	6	6	1	4	5756				740	740	740	81f6f292c45231c81cff920b572a826a_7191	d5a5a6aae91cabb186fe594057e8ea03_7512	ea50daa39c6c4a0574d509aa68b507b7_4085	4cb190364575d751463119e92857d019_7117	E_coli_7_04198	4840fb5d2d4897d217f65ba1ef1b22a7_7759
glnH		glutamine ABC transporter substrate-binding protein GlnH	6	6	1	4	19				746	746	746	81f6f292c45231c81cff920b572a826a_5999	d5a5a6aae91cabb186fe594057e8ea03_6343	ea50daa39c6c4a0574d509aa68b507b7_2965	4cb190364575d751463119e92857d019_5973	E_coli_7_03313	4840fb5d2d4897d217f65ba1ef1b22a7_6560
yecD		hydrolase	6	6	1	4	2875				566	566	566	81f6f292c45231c81cff920b572a826a_3960	d5a5a6aae91cabb186fe594057e8ea03_4020	ea50daa39c6c4a0574d509aa68b507b7_684	4cb190364575d751463119e92857d019_3797	E_coli_7_00516	4840fb5d2d4897d217f65ba1ef1b22a7_4403
yqfB		N(4)-acetylcytidine aminohydrolase	6	6	1	4	6150				311	311	311	81f6f292c45231c81cff920b572a826a_1676	d5a5a6aae91cabb186fe594057e8ea03_1767	ea50daa39c6c4a0574d509aa68b507b7_7931	4cb190364575d751463119e92857d019_1688	E_coli_7_02474	4840fb5d2d4897d217f65ba1ef1b22a7_2229
cspE		transcription antiterminator/RNA stability regulator CspE	6	6	1	4	2922				209	209	209	81f6f292c45231c81cff920b572a826a_4052	d5a5a6aae91cabb186fe594057e8ea03_4112	ea50daa39c6c4a0574d509aa68b507b7_806	4cb190364575d751463119e92857d019_3889	E_coli_7_00577	4840fb5d2d4897d217f65ba1ef1b22a7_4495
lptB		LPS export ABC transporter ATP-binding protein	6	6	1	4	223				725	725	725	81f6f292c45231c81cff920b572a826a_1017	d5a5a6aae91cabb186fe594057e8ea03_1010	ea50daa39c6c4a0574d509aa68b507b7_7176	4cb190364575d751463119e92857d019_1027	E_coli_7_03622	4840fb5d2d4897d217f65ba1ef1b22a7_1576
uspA		universal stress protein UspA	6	6	1	4	5029				434	434	434	81f6f292c45231c81cff920b572a826a_448	d5a5a6aae91cabb186fe594057e8ea03_455	ea50daa39c6c4a0574d509aa68b507b7_6635	4cb190364575d751463119e92857d019_446	E_coli_7_01798	4840fb5d2d4897d217f65ba1ef1b22a7_1031
marB		multiple antibiotic resistance protein MarB	6	6	1	4	3214				218	218	218	81f6f292c45231c81cff920b572a826a_4596	d5a5a6aae91cabb186fe594057e8ea03_4749	ea50daa39c6c4a0574d509aa68b507b7_1468	4cb190364575d751463119e92857d019_4559	E_coli_7_00842	4840fb5d2d4897d217f65ba1ef1b22a7_5163
gcvA		glycine cleavage system transcriptional regulator GcvA	6	6	1	4	6273				917	917	917	81f6f292c45231c81cff920b572a826a_1945	d5a5a6aae91cabb186fe594057e8ea03_2038	ea50daa39c6c4a0574d509aa68b507b7_8150	4cb190364575d751463119e92857d019_1950	E_coli_7_02773	4840fb5d2d4897d217f65ba1ef1b22a7_2484
WP_000725257.1		flagellar basal body-associated FliL family protein	6	6	1	4	5800				467	467	467	81f6f292c45231c81cff920b572a826a_7103	d5a5a6aae91cabb186fe594057e8ea03_7424	ea50daa39c6c4a0574d509aa68b507b7_3995	4cb190364575d751463119e92857d019_7035	E_coli_7_04157	4840fb5d2d4897d217f65ba1ef1b22a7_7671
yiaM		2,3-diketo-L-gulonate TRAP transporter small permease YiaM	6	6	1	4	5119				473	473	473	81f6f292c45231c81cff920b572a826a_263	d5a5a6aae91cabb186fe594057e8ea03_271	ea50daa39c6c4a0574d509aa68b507b7_6455	4cb190364575d751463119e92857d019_261	E_coli_7_02822	4840fb5d2d4897d217f65ba1ef1b22a7_847
araE		arabinose-proton symporter AraE	6	6	1	4	6216				1418	1418	1418	81f6f292c45231c81cff920b572a826a_1814	d5a5a6aae91cabb186fe594057e8ea03_1911	ea50daa39c6c4a0574d509aa68b507b7_8071	4cb190364575d751463119e92857d019_1826	E_coli_7_02403	4840fb5d2d4897d217f65ba1ef1b22a7_2367
pyrC		dihydroorotase	6	6	1	4	4352				1046	1046	1046	81f6f292c45231c81cff920b572a826a_5499	d5a5a6aae91cabb186fe594057e8ea03_5750	ea50daa39c6c4a0574d509aa68b507b7_2457	4cb190364575d751463119e92857d019_5476	E_coli_7_03838	4840fb5d2d4897d217f65ba1ef1b22a7_6044
ynfA		YnfA family protein	6	6	1	4	3168				326	326	326	81f6f292c45231c81cff920b572a826a_4552	d5a5a6aae91cabb186fe594057e8ea03_4602	ea50daa39c6c4a0574d509aa68b507b7_1310	4cb190364575d751463119e92857d019_4391	E_coli_7_00821	4840fb5d2d4897d217f65ba1ef1b22a7_5001
lpxD		UDP-3-O-(3-hydroxymyristoyl)glucosamine N-acyltransferase	6	6	1	4	2545				1025	1025	1025	81f6f292c45231c81cff920b572a826a_7352	d5a5a6aae91cabb186fe594057e8ea03_7669	ea50daa39c6c4a0574d509aa68b507b7_4250	4cb190364575d751463119e92857d019_7278	E_coli_7_01245	4840fb5d2d4897d217f65ba1ef1b22a7_7920
gntU		gluconate transporter	6	6	1	4	4967				1340	1340	1340	81f6f292c45231c81cff920b572a826a_554	d5a5a6aae91cabb186fe594057e8ea03_569	ea50daa39c6c4a0574d509aa68b507b7_6747	4cb190364575d751463119e92857d019_564	E_coli_7_01741	4840fb5d2d4897d217f65ba1ef1b22a7_1145
gpmB		2,3-diphosphoglycerate-dependent phosphoglycerate mutase GpmB	6	6	1	4	1441				647	647	647	81f6f292c45231c81cff920b572a826a_7724	d5a5a6aae91cabb186fe594057e8ea03_8050	ea50daa39c6c4a0574d509aa68b507b7_4636	4cb190364575d751463119e92857d019_7652	E_coli_7_01066	4840fb5d2d4897d217f65ba1ef1b22a7_8296
orn		oligoribonuclease	6	6	1	4	1594				545	545	545	81f6f292c45231c81cff920b572a826a_8283	d5a5a6aae91cabb186fe594057e8ea03_8492	ea50daa39c6c4a0574d509aa68b507b7_5060	4cb190364575d751463119e92857d019_8359	E_coli_7_02213	4840fb5d2d4897d217f65ba1ef1b22a7_8729
tam		trans-aconitate 2-methyltransferase	6	6	1	4	3227				758	758	758	81f6f292c45231c81cff920b572a826a_4622	d5a5a6aae91cabb186fe594057e8ea03_4775	ea50daa39c6c4a0574d509aa68b507b7_1494	4cb190364575d751463119e92857d019_4585	E_coli_7_00855	4840fb5d2d4897d217f65ba1ef1b22a7_5189
yniB		YniB family protein	6	6	1	4	3022				536	536	536	81f6f292c45231c81cff920b572a826a_4248	d5a5a6aae91cabb186fe594057e8ea03_4296	ea50daa39c6c4a0574d509aa68b507b7_1010	4cb190364575d751463119e92857d019_4089	E_coli_7_00674	4840fb5d2d4897d217f65ba1ef1b22a7_4699
flhe		flagellar protein FlhE	6	6	1	4	2863				392	392	392	81f6f292c45231c81cff920b572a826a_3936	d5a5a6aae91cabb186fe594057e8ea03_3996	ea50daa39c6c4a0574d509aa68b507b7_662	4cb190364575d751463119e92857d019_3773	E_coli_7_00505	4840fb5d2d4897d217f65ba1ef1b22a7_4379
znuC		zinc ABC transporter ATP-binding protein ZnuC	6	6	1	4	2885				755	755	755	81f6f292c45231c81cff920b572a826a_3980	d5a5a6aae91cabb186fe594057e8ea03_4040	ea50daa39c6c4a0574d509aa68b507b7_704	4cb190364575d751463119e92857d019_3817	E_coli_7_00525	4840fb5d2d4897d217f65ba1ef1b22a7_4423
arnC		undecaprenyl-phosphate 4-deoxy-4-formamido-L-arabinose transferase	6	6	1	4	4175				968	968	968	81f6f292c45231c81cff920b572a826a_3005	d5a5a6aae91cabb186fe594057e8ea03_3088	ea50daa39c6c4a0574d509aa68b507b7_9244	4cb190364575d751463119e92857d019_2994	E_coli_7_00143	4840fb5d2d4897d217f65ba1ef1b22a7_3578
rmf		ribosome modulation factor	6	6	1	4	3493				167	167	167	81f6f292c45231c81cff920b572a826a_5704	d5a5a6aae91cabb186fe594057e8ea03_6052	ea50daa39c6c4a0574d509aa68b507b7_2674	4cb190364575d751463119e92857d019_5678	E_coli_7_03091	4840fb5d2d4897d217f65ba1ef1b22a7_6269
selA		L-seryl-tRNA(Sec) selenium transferase	6	6	1	4	5138				1391	1391	1391	81f6f292c45231c81cff920b572a826a_227	d5a5a6aae91cabb186fe594057e8ea03_239	ea50daa39c6c4a0574d509aa68b507b7_6419	4cb190364575d751463119e92857d019_225	E_coli_7_02840	4840fb5d2d4897d217f65ba1ef1b22a7_813
bcsQ		cellulose biosynthesis protein BcsQ	6	6	1	4	5073				752	752	752	81f6f292c45231c81cff920b572a826a_362	d5a5a6aae91cabb186fe594057e8ea03_369	ea50daa39c6c4a0574d509aa68b507b7_6551	4cb190364575d751463119e92857d019_360	E_coli_7_01841	4840fb5d2d4897d217f65ba1ef1b22a7_945
yebV		DUF1480 family protein	6	6	1	4	2908				236	236	236	81f6f292c45231c81cff920b572a826a_4024	d5a5a6aae91cabb186fe594057e8ea03_4084	ea50daa39c6c4a0574d509aa68b507b7_778	4cb190364575d751463119e92857d019_3861	E_coli_7_00565	4840fb5d2d4897d217f65ba1ef1b22a7_4467
dpiA		two-component response regulator DpiA	6	6	1	4	5393				680	680	680	81f6f292c45231c81cff920b572a826a_6417	d5a5a6aae91cabb186fe594057e8ea03_6737	ea50daa39c6c4a0574d509aa68b507b7_3357	4cb190364575d751463119e92857d019_6391	E_coli_7_01341	4840fb5d2d4897d217f65ba1ef1b22a7_6951
glcD		glycolate oxidase subunit GlcD	6	6	1	4	358				1499	1499	1499	81f6f292c45231c81cff920b572a826a_1476	d5a5a6aae91cabb186fe594057e8ea03_1573	ea50daa39c6c4a0574d509aa68b507b7_7633	4cb190364575d751463119e92857d019_1496	E_coli_7_02567	4840fb5d2d4897d217f65ba1ef1b22a7_2039
safA		two-component system connector SafA	6	6	1	4	3246				197	233	203	81f6f292c45231c81cff920b572a826a_4662	d5a5a6aae91cabb186fe594057e8ea03_4815	ea50daa39c6c4a0574d509aa68b507b7_1534	4cb190364575d751463119e92857d019_4633	E_coli_7_00875	4840fb5d2d4897d217f65ba1ef1b22a7_5229
motA		flagellar motor stator protein MotA	6	6	1	4	5802				863	863	863	81f6f292c45231c81cff920b572a826a_7099	d5a5a6aae91cabb186fe594057e8ea03_7420	ea50daa39c6c4a0574d509aa68b507b7_3991	4cb190364575d751463119e92857d019_7031	E_coli_7_04155	4840fb5d2d4897d217f65ba1ef1b22a7_7667
hisM		ABC transporter permease	6	6	1	4	4125				716	716	716	81f6f292c45231c81cff920b572a826a_2905	d5a5a6aae91cabb186fe594057e8ea03_2986	ea50daa39c6c4a0574d509aa68b507b7_9144	4cb190364575d751463119e92857d019_2894	E_coli_7_00093	4840fb5d2d4897d217f65ba1ef1b22a7_3478
maeB		NADP-dependent oxaloacetate-decarboxylating malate dehydrogenase	6	6	1	4	3972				2279	2279	2279	81f6f292c45231c81cff920b572a826a_2609	d5a5a6aae91cabb186fe594057e8ea03_2708	ea50daa39c6c4a0574d509aa68b507b7_8840	4cb190364575d751463119e92857d019_2613	E_coli_7_03519	4840fb5d2d4897d217f65ba1ef1b22a7_3200
leuC		3-isopropylmalate dehydratase large subunit	6	6	1	4	489				1400	1400	1400	81f6f292c45231c81cff920b572a826a_7566	d5a5a6aae91cabb186fe594057e8ea03_7888	ea50daa39c6c4a0574d509aa68b507b7_4464	4cb190364575d751463119e92857d019_7494	E_coli_7_01142	4840fb5d2d4897d217f65ba1ef1b22a7_8134
nuoE		NADH-quinone oxidoreductase subunit NuoE	6	6	1	4	4148				500	500	500	81f6f292c45231c81cff920b572a826a_2949	d5a5a6aae91cabb186fe594057e8ea03_3030	ea50daa39c6c4a0574d509aa68b507b7_9188	4cb190364575d751463119e92857d019_2938	E_coli_7_00116	4840fb5d2d4897d217f65ba1ef1b22a7_3522
ariR		biofilm/acid-resistance regulator AriR	6	6	1	4	4434				266	266	266	81f6f292c45231c81cff920b572a826a_5339	d5a5a6aae91cabb186fe594057e8ea03_5474	ea50daa39c6c4a0574d509aa68b507b7_2293	4cb190364575d751463119e92857d019_5312	E_coli_7_03694	4840fb5d2d4897d217f65ba1ef1b22a7_5880
ygaM		DUF883 domain-containing protein	6	6	1	4	1111				329	329	329	81f6f292c45231c81cff920b572a826a_2230	d5a5a6aae91cabb186fe594057e8ea03_2331	ea50daa39c6c4a0574d509aa68b507b7_8467	4cb190364575d751463119e92857d019_2231	E_coli_7_02633	4840fb5d2d4897d217f65ba1ef1b22a7_2769
WP_000248097.1		acyl carrier protein	6	6	1	4	353				248	248	248	81f6f292c45231c81cff920b572a826a_1466	d5a5a6aae91cabb186fe594057e8ea03_1563	ea50daa39c6c4a0574d509aa68b507b7_7623	4cb190364575d751463119e92857d019_1486	E_coli_7_02572	4840fb5d2d4897d217f65ba1ef1b22a7_2029
speG		spermidine N1-acetyltransferase	6	6	1	4	3166				560	560	560	81f6f292c45231c81cff920b572a826a_4548	d5a5a6aae91cabb186fe594057e8ea03_4598	ea50daa39c6c4a0574d509aa68b507b7_1306	4cb190364575d751463119e92857d019_4387	E_coli_7_00819	4840fb5d2d4897d217f65ba1ef1b22a7_4997
gpmA		2,3-diphosphoglycerate-dependent phosphoglycerate mutase	6	6	1	4	72				752	752	752	81f6f292c45231c81cff920b572a826a_6114	d5a5a6aae91cabb186fe594057e8ea03_6460	ea50daa39c6c4a0574d509aa68b507b7_3080	4cb190364575d751463119e92857d019_6088	E_coli_7_03257	4840fb5d2d4897d217f65ba1ef1b22a7_6679
ddpD		ABC transporter ATP-binding protein	6	6	1	4	3263				986	986	986	81f6f292c45231c81cff920b572a826a_4698	d5a5a6aae91cabb186fe594057e8ea03_4853	ea50daa39c6c4a0574d509aa68b507b7_1568	4cb190364575d751463119e92857d019_4669	E_coli_7_00891	4840fb5d2d4897d217f65ba1ef1b22a7_5265
ackA		acetate kinase	6	6	1	4	4136				1202	1202	1202	81f6f292c45231c81cff920b572a826a_2927	d5a5a6aae91cabb186fe594057e8ea03_3008	ea50daa39c6c4a0574d509aa68b507b7_9166	4cb190364575d751463119e92857d019_2916	E_coli_7_00104	4840fb5d2d4897d217f65ba1ef1b22a7_3500
yggP		zinc-binding dehydrogenase	6	6	1	4	6112				1277	1277	1277	81f6f292c45231c81cff920b572a826a_1597	d5a5a6aae91cabb186fe594057e8ea03_1688	ea50daa39c6c4a0574d509aa68b507b7_7850	4cb190364575d751463119e92857d019_1609	E_coli_7_02509	4840fb5d2d4897d217f65ba1ef1b22a7_2150
torR		two-component system response regulator TorR	6	6	1	4	3536				692	692	692	81f6f292c45231c81cff920b572a826a_5615	d5a5a6aae91cabb186fe594057e8ea03_5963	ea50daa39c6c4a0574d509aa68b507b7_2585	4cb190364575d751463119e92857d019_5589	E_coli_7_03050	4840fb5d2d4897d217f65ba1ef1b22a7_6180
araF		arabinose ABC transporter substrate-binding protein AraF	6	6	1	4	2843				989	989	989	81f6f292c45231c81cff920b572a826a_3896	d5a5a6aae91cabb186fe594057e8ea03_3954	ea50daa39c6c4a0574d509aa68b507b7_622	4cb190364575d751463119e92857d019_3733	E_coli_7_00485	4840fb5d2d4897d217f65ba1ef1b22a7_4335
gnsA		addiction module toxin, GnsA/GnsB family	6	6	1	4	3532				173	173	173	81f6f292c45231c81cff920b572a826a_5623	d5a5a6aae91cabb186fe594057e8ea03_5971	ea50daa39c6c4a0574d509aa68b507b7_2593	4cb190364575d751463119e92857d019_5597	E_coli_7_03054	4840fb5d2d4897d217f65ba1ef1b22a7_6188
entH		proofreading thioesterase EntH	6	6	1	4	5417				413	413	413	81f6f292c45231c81cff920b572a826a_6463	d5a5a6aae91cabb186fe594057e8ea03_6783	ea50daa39c6c4a0574d509aa68b507b7_3403	4cb190364575d751463119e92857d019_6437	E_coli_7_01365	4840fb5d2d4897d217f65ba1ef1b22a7_6997
caiD		crotonobetainyl-CoA hydratase	6	6	1	4	436				785	785	785	81f6f292c45231c81cff920b572a826a_7639	d5a5a6aae91cabb186fe594057e8ea03_7959	ea50daa39c6c4a0574d509aa68b507b7_4561	4cb190364575d751463119e92857d019_7565	E_coli_7_01107	4840fb5d2d4897d217f65ba1ef1b22a7_8211
secF		protein translocase subunit SecF	6	6	1	4	5526				971	971	971	81f6f292c45231c81cff920b572a826a_6776	d5a5a6aae91cabb186fe594057e8ea03_7143	ea50daa39c6c4a0574d509aa68b507b7_3750	4cb190364575d751463119e92857d019_6750	E_coli_7_01517	4840fb5d2d4897d217f65ba1ef1b22a7_7334
fusA		elongation factor G	6	6	1	4	4870				2114	2114	2114	81f6f292c45231c81cff920b572a826a_744	d5a5a6aae91cabb186fe594057e8ea03_769	ea50daa39c6c4a0574d509aa68b507b7_6935	4cb190364575d751463119e92857d019_754	E_coli_7_01641	4840fb5d2d4897d217f65ba1ef1b22a7_1335
fdoH		formate dehydrogenase O subunit beta	6	6	1	4	2073				902	902	902	81f6f292c45231c81cff920b572a826a_8895	d5a5a6aae91cabb186fe594057e8ea03_9334	ea50daa39c6c4a0574d509aa68b507b7_5736	4cb190364575d751463119e92857d019_8973	E_coli_7_04015	4840fb5d2d4897d217f65ba1ef1b22a7_158
sra		stationary-phase-induced ribosome-associated protein	6	6	1	4	3267				137	137	137	81f6f292c45231c81cff920b572a826a_4706	d5a5a6aae91cabb186fe594057e8ea03_4861	ea50daa39c6c4a0574d509aa68b507b7_1576	4cb190364575d751463119e92857d019_4677	E_coli_7_00895	4840fb5d2d4897d217f65ba1ef1b22a7_5273
glgB		1,4-alpha-glucan branching enzyme	6	6	1	4	4961				2186	2186	2186	81f6f292c45231c81cff920b572a826a_562	d5a5a6aae91cabb186fe594057e8ea03_581	ea50daa39c6c4a0574d509aa68b507b7_6757	4cb190364575d751463119e92857d019_572	E_coli_7_01738	4840fb5d2d4897d217f65ba1ef1b22a7_1157
yddM		HigA family addiction module antitoxin	6	6	1	4	3270				284	284	284	81f6f292c45231c81cff920b572a826a_4712	d5a5a6aae91cabb186fe594057e8ea03_4867	ea50daa39c6c4a0574d509aa68b507b7_1582	4cb190364575d751463119e92857d019_4683	E_coli_7_00898	4840fb5d2d4897d217f65ba1ef1b22a7_5279
rpmI		50S ribosomal protein L35	6	6	1	4	3032				197	197	197	81f6f292c45231c81cff920b572a826a_4266	d5a5a6aae91cabb186fe594057e8ea03_4314	ea50daa39c6c4a0574d509aa68b507b7_1028	4cb190364575d751463119e92857d019_4107	E_coli_7_00684	4840fb5d2d4897d217f65ba1ef1b22a7_4717
sdhC		succinate dehydrogenase cytochrome b556 subunit	6	6	1	4	45				404	404	404	81f6f292c45231c81cff920b572a826a_6192	d5a5a6aae91cabb186fe594057e8ea03_6538	ea50daa39c6c4a0574d509aa68b507b7_3158	4cb190364575d751463119e92857d019_6166	E_coli_7_03223	4840fb5d2d4897d217f65ba1ef1b22a7_6754
dam		adenine-specific DNA-methyltransferase	6	6	1	4	4912				836	836	836	81f6f292c45231c81cff920b572a826a_660	d5a5a6aae91cabb186fe594057e8ea03_675	ea50daa39c6c4a0574d509aa68b507b7_6851	4cb190364575d751463119e92857d019_670	E_coli_7_01688	4840fb5d2d4897d217f65ba1ef1b22a7_1251
dksA		RNA polymerase-binding protein DksA	6	6	1	4	2583				455	455	455	81f6f292c45231c81cff920b572a826a_7420	d5a5a6aae91cabb186fe594057e8ea03_7737	ea50daa39c6c4a0574d509aa68b507b7_4316	4cb190364575d751463119e92857d019_7348	E_coli_7_01211	4840fb5d2d4897d217f65ba1ef1b22a7_7988
adhE		bifunctional acetaldehyde-CoA/alcohol dehydrogenase	6	6	1	4	4509				2675	2675	2675	81f6f292c45231c81cff920b572a826a_5177	d5a5a6aae91cabb186fe594057e8ea03_5310	ea50daa39c6c4a0574d509aa68b507b7_2132	4cb190364575d751463119e92857d019_5150	E_coli_7_02060	4840fb5d2d4897d217f65ba1ef1b22a7_5722
ndk		nucleoside-diphosphate kinase	6	6	1	4	3898				431	431	431	81f6f292c45231c81cff920b572a826a_2489	d5a5a6aae91cabb186fe594057e8ea03_2588	ea50daa39c6c4a0574d509aa68b507b7_8720	4cb190364575d751463119e92857d019_2493	E_coli_7_03456	4840fb5d2d4897d217f65ba1ef1b22a7_3048
grxA		glutaredoxin 1	6	6	1	4	3389				257	257	257	81f6f292c45231c81cff920b572a826a_5915	d5a5a6aae91cabb186fe594057e8ea03_6263	ea50daa39c6c4a0574d509aa68b507b7_2885	4cb190364575d751463119e92857d019_5889	E_coli_7_03195	4840fb5d2d4897d217f65ba1ef1b22a7_6480
fau		5-formyltetrahydrofolate cyclo-ligase	6	6	1	4	6138				602	602	602	81f6f292c45231c81cff920b572a826a_1649	d5a5a6aae91cabb186fe594057e8ea03_1740	ea50daa39c6c4a0574d509aa68b507b7_7904	4cb190364575d751463119e92857d019_1661	E_coli_7_02485	4840fb5d2d4897d217f65ba1ef1b22a7_2202
yddG		aromatic amino acid efflux DMT transporter YddG	6	6	1	4	3275				824	881	871	81f6f292c45231c81cff920b572a826a_4720	d5a5a6aae91cabb186fe594057e8ea03_4875	ea50daa39c6c4a0574d509aa68b507b7_1590	4cb190364575d751463119e92857d019_4691	E_coli_7_00903	4840fb5d2d4897d217f65ba1ef1b22a7_5287
rnk		nucleoside diphosphate kinase regulator	6	6	1	4	5404				410	410	410	81f6f292c45231c81cff920b572a826a_6437	d5a5a6aae91cabb186fe594057e8ea03_6757	ea50daa39c6c4a0574d509aa68b507b7_3377	4cb190364575d751463119e92857d019_6411	E_coli_7_01351	4840fb5d2d4897d217f65ba1ef1b22a7_6971
iraP		anti-adapter protein IraP	6	6	1	4	5497				260	260	260	81f6f292c45231c81cff920b572a826a_6830	d5a5a6aae91cabb186fe594057e8ea03_7195	ea50daa39c6c4a0574d509aa68b507b7_3802	4cb190364575d751463119e92857d019_6802	E_coli_7_01543	4840fb5d2d4897d217f65ba1ef1b22a7_7386
recR		recombination mediator RecR	6	6	1	4	5590				605	605	605	81f6f292c45231c81cff920b572a826a_6648	d5a5a6aae91cabb186fe594057e8ea03_7009	ea50daa39c6c4a0574d509aa68b507b7_3616	4cb190364575d751463119e92857d019_6622	E_coli_7_01455	4840fb5d2d4897d217f65ba1ef1b22a7_7200
can		carbonate dehydratase	6	6	1	4	2595				662	662	662	81f6f292c45231c81cff920b572a826a_7458	d5a5a6aae91cabb186fe594057e8ea03_7780	ea50daa39c6c4a0574d509aa68b507b7_4354	4cb190364575d751463119e92857d019_7386	E_coli_7_01192	4840fb5d2d4897d217f65ba1ef1b22a7_8026
flgG		flagellar basal-body rod protein FlgG	6	6	1	4	4368				782	782	782	81f6f292c45231c81cff920b572a826a_5467	d5a5a6aae91cabb186fe594057e8ea03_5718	ea50daa39c6c4a0574d509aa68b507b7_2425	4cb190364575d751463119e92857d019_5444	E_coli_7_03822	4840fb5d2d4897d217f65ba1ef1b22a7_6012
htpX		protease HtpX	6	6	1	4	2915				881	881	881	81f6f292c45231c81cff920b572a826a_4038	d5a5a6aae91cabb186fe594057e8ea03_4098	ea50daa39c6c4a0574d509aa68b507b7_792	4cb190364575d751463119e92857d019_3875	E_coli_7_00572	4840fb5d2d4897d217f65ba1ef1b22a7_4481
iscA		iron-sulfur cluster assembly protein IscA	6	6	1	4	3887				323	323	323	81f6f292c45231c81cff920b572a826a_2467	d5a5a6aae91cabb186fe594057e8ea03_2568	ea50daa39c6c4a0574d509aa68b507b7_8700	4cb190364575d751463119e92857d019_2471	E_coli_7_03446	4840fb5d2d4897d217f65ba1ef1b22a7_3026
nrdR		transcriptional regulator NrdR	6	6	1	4	5530				449	449	449	81f6f292c45231c81cff920b572a826a_6768	d5a5a6aae91cabb186fe594057e8ea03_7135	ea50daa39c6c4a0574d509aa68b507b7_3742	4cb190364575d751463119e92857d019_6742	E_coli_7_01513	4840fb5d2d4897d217f65ba1ef1b22a7_7326
agaD		PTS galactosamine transporter subunit IID	6	6	1	4	283				791	791	791	81f6f292c45231c81cff920b572a826a_1143	d5a5a6aae91cabb186fe594057e8ea03_1136	ea50daa39c6c4a0574d509aa68b507b7_7302	4cb190364575d751463119e92857d019_1153	E_coli_7_03561	4840fb5d2d4897d217f65ba1ef1b22a7_1702
glpF		glycerol uptake facilitator protein GlpF	6	6	1	4	6043				845	845	845	81f6f292c45231c81cff920b572a826a_8829	d5a5a6aae91cabb186fe594057e8ea03_9268	ea50daa39c6c4a0574d509aa68b507b7_5670	4cb190364575d751463119e92857d019_8903	E_coli_7_04050	4840fb5d2d4897d217f65ba1ef1b22a7_92
yddL		porin	6	6	1	4	3276				275	290	282	81f6f292c45231c81cff920b572a826a_4722	d5a5a6aae91cabb186fe594057e8ea03_4877	ea50daa39c6c4a0574d509aa68b507b7_1592	4cb190364575d751463119e92857d019_4693	E_coli_7_00904	4840fb5d2d4897d217f65ba1ef1b22a7_5289
galP		galactose/proton symporter	6	6	1	4	524				1394	1394	1394	81f6f292c45231c81cff920b572a826a_1573	d5a5a6aae91cabb186fe594057e8ea03_1666	ea50daa39c6c4a0574d509aa68b507b7_7828	4cb190364575d751463119e92857d019_1587	E_coli_7_02520	4840fb5d2d4897d217f65ba1ef1b22a7_2130
lptD		LPS assembly protein LptD	6	6	1	4	6087				2354	2354	2354	81f6f292c45231c81cff920b572a826a_7603	d5a5a6aae91cabb186fe594057e8ea03_7923	ea50daa39c6c4a0574d509aa68b507b7_4603	4cb190364575d751463119e92857d019_7529	E_coli_7_01125	4840fb5d2d4897d217f65ba1ef1b22a7_8169
xerC		tyrosine recombinase XerC	6	6	1	4	1168				896	896	896	81f6f292c45231c81cff920b572a826a_9070	d5a5a6aae91cabb186fe594057e8ea03_9507	ea50daa39c6c4a0574d509aa68b507b7_5911	4cb190364575d751463119e92857d019_9144	E_coli_7_04262	4840fb5d2d4897d217f65ba1ef1b22a7_335
yiaK		3-dehydro-L-gulonate 2-dehydrogenase	6	6	1	4	5117				998	998	998	81f6f292c45231c81cff920b572a826a_267	d5a5a6aae91cabb186fe594057e8ea03_275	ea50daa39c6c4a0574d509aa68b507b7_6459	4cb190364575d751463119e92857d019_265	E_coli_7_02820	4840fb5d2d4897d217f65ba1ef1b22a7_851
speFL		leader peptide SpeFL	6	6	1	4	5332				104	104	104	81f6f292c45231c81cff920b572a826a_6276	d5a5a6aae91cabb186fe594057e8ea03_6596	ea50daa39c6c4a0574d509aa68b507b7_3216	4cb190364575d751463119e92857d019_6250	E_coli_7_01274	4840fb5d2d4897d217f65ba1ef1b22a7_6810
ettA		energy-dependent translational throttle protein EttA	6	6	1	4	1445				1667	1667	1667	81f6f292c45231c81cff920b572a826a_7732	d5a5a6aae91cabb186fe594057e8ea03_8058	ea50daa39c6c4a0574d509aa68b507b7_4646	4cb190364575d751463119e92857d019_7660	E_coli_7_01062	4840fb5d2d4897d217f65ba1ef1b22a7_8304
ispD		2-C-methyl-D-erythritol 4-phosphate cytidylyltransferase	6	6	1	4	1033				710	710	710	81f6f292c45231c81cff920b572a826a_2071	d5a5a6aae91cabb186fe594057e8ea03_2164	ea50daa39c6c4a0574d509aa68b507b7_8276	4cb190364575d751463119e92857d019_2076	E_coli_7_02711	4840fb5d2d4897d217f65ba1ef1b22a7_2610
ppdA		prepilin peptidase-dependent protein	6	6	1	4	6231				470	470	470	81f6f292c45231c81cff920b572a826a_1844	d5a5a6aae91cabb186fe594057e8ea03_1941	ea50daa39c6c4a0574d509aa68b507b7_8101	4cb190364575d751463119e92857d019_1856	E_coli_7_02387	4840fb5d2d4897d217f65ba1ef1b22a7_2397
miaA		tRNA (adenosine(37)-N6)-dimethylallyltransferase MiaA	6	6	1	4	1601				950	950	950	81f6f292c45231c81cff920b572a826a_8260	d5a5a6aae91cabb186fe594057e8ea03_8469	ea50daa39c6c4a0574d509aa68b507b7_5037	4cb190364575d751463119e92857d019_8336	E_coli_7_02204	4840fb5d2d4897d217f65ba1ef1b22a7_8706
dppC		dipeptide ABC transporter permease DppC	6	6	1	4	5083				902	902	902	81f6f292c45231c81cff920b572a826a_340	d5a5a6aae91cabb186fe594057e8ea03_347	ea50daa39c6c4a0574d509aa68b507b7_6529	4cb190364575d751463119e92857d019_338	E_coli_7_01852	4840fb5d2d4897d217f65ba1ef1b22a7_923
QMI17516.1		leucine-rich repeat domain-containing protein	6	6	1	4	3277				1295	1331	1307	81f6f292c45231c81cff920b572a826a_4724	d5a5a6aae91cabb186fe594057e8ea03_4879	ea50daa39c6c4a0574d509aa68b507b7_1594	4cb190364575d751463119e92857d019_4695	E_coli_7_00905	4840fb5d2d4897d217f65ba1ef1b22a7_5291
cecR		DNA-binding transcriptional regulator CecR	6	6	1	4	114				671	671	671	81f6f292c45231c81cff920b572a826a_6031	d5a5a6aae91cabb186fe594057e8ea03_6375	ea50daa39c6c4a0574d509aa68b507b7_2995	4cb190364575d751463119e92857d019_6005	E_coli_7_03298	4840fb5d2d4897d217f65ba1ef1b22a7_6594
pflA		pyruvate formate lyase 1-activating protein	6	6	1	4	3442				740	740	740	81f6f292c45231c81cff920b572a826a_5806	d5a5a6aae91cabb186fe594057e8ea03_6154	ea50daa39c6c4a0574d509aa68b507b7_2776	4cb190364575d751463119e92857d019_5780	E_coli_7_03142	4840fb5d2d4897d217f65ba1ef1b22a7_6371
ampE		beta-lactamase regulator AmpE	6	6	1	4	472				854	854	854	81f6f292c45231c81cff920b572a826a_7488	d5a5a6aae91cabb186fe594057e8ea03_7810	ea50daa39c6c4a0574d509aa68b507b7_4384	4cb190364575d751463119e92857d019_7416	E_coli_7_01177	4840fb5d2d4897d217f65ba1ef1b22a7_8056
napG		ferredoxin-type protein NapG	6	6	1	4	4218				695	695	695	81f6f292c45231c81cff920b572a826a_3101	d5a5a6aae91cabb186fe594057e8ea03_3170	ea50daa39c6c4a0574d509aa68b507b7_9324	4cb190364575d751463119e92857d019_3074	E_coli_7_00183	4840fb5d2d4897d217f65ba1ef1b22a7_3660
csgA		curlin major subunit CsgA	6	6	1	4	4333				455	455	455	81f6f292c45231c81cff920b572a826a_5537	d5a5a6aae91cabb186fe594057e8ea03_5788	ea50daa39c6c4a0574d509aa68b507b7_2495	4cb190364575d751463119e92857d019_5514	E_coli_7_03013	4840fb5d2d4897d217f65ba1ef1b22a7_6082
yacL		protein YacL	6	6	1	4	464				362	362	362	81f6f292c45231c81cff920b572a826a_7472	d5a5a6aae91cabb186fe594057e8ea03_7794	ea50daa39c6c4a0574d509aa68b507b7_4368	4cb190364575d751463119e92857d019_7400	E_coli_7_01185	4840fb5d2d4897d217f65ba1ef1b22a7_8040
dctA		C4-dicarboxylate transporter DctC	6	6	1	4	5067				1286	1286	1286	81f6f292c45231c81cff920b572a826a_374	d5a5a6aae91cabb186fe594057e8ea03_381	ea50daa39c6c4a0574d509aa68b507b7_6563	4cb190364575d751463119e92857d019_372	E_coli_7_01835	4840fb5d2d4897d217f65ba1ef1b22a7_957
ulaG		L-ascorbate 6-phosphate lactonase	6	6	1	4	1622				1064	1064	1064	81f6f292c45231c81cff920b572a826a_8218	d5a5a6aae91cabb186fe594057e8ea03_8427	ea50daa39c6c4a0574d509aa68b507b7_4995	4cb190364575d751463119e92857d019_8294	E_coli_7_02183	4840fb5d2d4897d217f65ba1ef1b22a7_8664
adiC		arginine/agmatine antiporter	6	6	1	4	1546				1337	1337	1337	81f6f292c45231c81cff920b572a826a_8380	d5a5a6aae91cabb186fe594057e8ea03_8752	ea50daa39c6c4a0574d509aa68b507b7_5157	4cb190364575d751463119e92857d019_8456	E_coli_7_02261	4840fb5d2d4897d217f65ba1ef1b22a7_8826
frmR		formaldehyde-responsive transcriptional repressor FrmR	6	6	1	4	5476				275	275	275	81f6f292c45231c81cff920b572a826a_6868	d5a5a6aae91cabb186fe594057e8ea03_7233	ea50daa39c6c4a0574d509aa68b507b7_3840	4cb190364575d751463119e92857d019_6840	E_coli_7_01561	4840fb5d2d4897d217f65ba1ef1b22a7_7424
yddE		PhzF family isomerase	6	6	1	4	3283				893	893	893	81f6f292c45231c81cff920b572a826a_4736	d5a5a6aae91cabb186fe594057e8ea03_4891	ea50daa39c6c4a0574d509aa68b507b7_1606	4cb190364575d751463119e92857d019_4707	E_coli_7_00911	4840fb5d2d4897d217f65ba1ef1b22a7_5303
rplM		50S ribosomal protein L13	6	6	1	4	198				428	428	428	81f6f292c45231c81cff920b572a826a_967	d5a5a6aae91cabb186fe594057e8ea03_962	ea50daa39c6c4a0574d509aa68b507b7_7128	4cb190364575d751463119e92857d019_977	E_coli_7_03646	4840fb5d2d4897d217f65ba1ef1b22a7_1528
yqjE		phage holin family protein	6	6	1	4	5922				404	404	404	81f6f292c45231c81cff920b572a826a_1224	d5a5a6aae91cabb186fe594057e8ea03_1219	ea50daa39c6c4a0574d509aa68b507b7_7383	4cb190364575d751463119e92857d019_1236	E_coli_7_03869	4840fb5d2d4897d217f65ba1ef1b22a7_1785
uvrA		excinuclease ABC subunit UvrA	6	6	1	4	1493				2822	2822	2822	81f6f292c45231c81cff920b572a826a_8484	d5a5a6aae91cabb186fe594057e8ea03_8856	ea50daa39c6c4a0574d509aa68b507b7_5261	4cb190364575d751463119e92857d019_8560	E_coli_7_02314	4840fb5d2d4897d217f65ba1ef1b22a7_8930
rplL		50S ribosomal protein L7/L12	6	6	1	4	712				365	365	365	81f6f292c45231c81cff920b572a826a_8696	d5a5a6aae91cabb186fe594057e8ea03_9135	ea50daa39c6c4a0574d509aa68b507b7_5541	4cb190364575d751463119e92857d019_8770	E_coli_7_04477	4840fb5d2d4897d217f65ba1ef1b22a7_9092
WP_000859525.1		adenylyltransferase/cytidyltransferase family protein	6	6	1	4	5776				395	395	395	81f6f292c45231c81cff920b572a826a_7151	d5a5a6aae91cabb186fe594057e8ea03_7472	ea50daa39c6c4a0574d509aa68b507b7_4045	4cb190364575d751463119e92857d019_7083	E_coli_7_04181	4840fb5d2d4897d217f65ba1ef1b22a7_7719
macA		macrolide transporter subunit MacA	6	6	1	4	3418				1115	1115	1115	81f6f292c45231c81cff920b572a826a_5857	d5a5a6aae91cabb186fe594057e8ea03_6205	ea50daa39c6c4a0574d509aa68b507b7_2825	4cb190364575d751463119e92857d019_5831	E_coli_7_03166	4840fb5d2d4897d217f65ba1ef1b22a7_6422
rpsC		30S ribosomal protein S3	6	6	1	4	122				701	701	701	81f6f292c45231c81cff920b572a826a_796	d5a5a6aae91cabb186fe594057e8ea03_793	ea50daa39c6c4a0574d509aa68b507b7_6959	4cb190364575d751463119e92857d019_806	E_coli_7_01615	4840fb5d2d4897d217f65ba1ef1b22a7_1359
agaR		aga operon transcriptional regulator AgaR	6	6	1	4	294				809	809	809	81f6f292c45231c81cff920b572a826a_1165	d5a5a6aae91cabb186fe594057e8ea03_1158	ea50daa39c6c4a0574d509aa68b507b7_7324	4cb190364575d751463119e92857d019_1175	E_coli_7_03550	4840fb5d2d4897d217f65ba1ef1b22a7_1724
ygfB		UPF0149 family protein YgfB	6	6	1	4	6140				578	578	578	81f6f292c45231c81cff920b572a826a_1656	d5a5a6aae91cabb186fe594057e8ea03_1747	ea50daa39c6c4a0574d509aa68b507b7_7911	4cb190364575d751463119e92857d019_1668	E_coli_7_02483	4840fb5d2d4897d217f65ba1ef1b22a7_2209
ftsP		cell division protein FtsP	6	6	1	4	6009				1412	1412	1412	81f6f292c45231c81cff920b572a826a_1394	d5a5a6aae91cabb186fe594057e8ea03_1485	ea50daa39c6c4a0574d509aa68b507b7_7551	4cb190364575d751463119e92857d019_1414	E_coli_7_03949	4840fb5d2d4897d217f65ba1ef1b22a7_1955
pptA		tautomerase PptA	6	6	1	4	5658				227	233	230	81f6f292c45231c81cff920b572a826a_4742	d5a5a6aae91cabb186fe594057e8ea03_4897	ea50daa39c6c4a0574d509aa68b507b7_1612	4cb190364575d751463119e92857d019_4713	E_coli_7_00914	4840fb5d2d4897d217f65ba1ef1b22a7_5309
yjbD		DUF3811 domain-containing protein	6	6	1	4	749				272	272	272	81f6f292c45231c81cff920b572a826a_8605	d5a5a6aae91cabb186fe594057e8ea03_9056	ea50daa39c6c4a0574d509aa68b507b7_5462	4cb190364575d751463119e92857d019_8679	E_coli_7_02356	4840fb5d2d4897d217f65ba1ef1b22a7_9013
rbsR		ribose operon transcriptional repressor RbsR	6	6	1	4	1226				992	992	992	81f6f292c45231c81cff920b572a826a_9196	d5a5a6aae91cabb186fe594057e8ea03_9631	ea50daa39c6c4a0574d509aa68b507b7_6071	4cb190364575d751463119e92857d019_9270	E_coli_7_03003	4840fb5d2d4897d217f65ba1ef1b22a7_465
ldtB		L,D-transpeptidase	6	6	1	4	519				920	920	920	81f6f292c45231c81cff920b572a826a_5981	d5a5a6aae91cabb186fe594057e8ea03_6325	ea50daa39c6c4a0574d509aa68b507b7_2947	4cb190364575d751463119e92857d019_5955	E_coli_7_03321	4840fb5d2d4897d217f65ba1ef1b22a7_6542
arsR		As(III)-sensing metalloregulatory transcriptional repressor ArsR	6	6	1	4	5038				353	353	353	81f6f292c45231c81cff920b572a826a_432	d5a5a6aae91cabb186fe594057e8ea03_439	ea50daa39c6c4a0574d509aa68b507b7_6621	4cb190364575d751463119e92857d019_430	E_coli_7_01805	4840fb5d2d4897d217f65ba1ef1b22a7_1015
yebF		protein YebF	6	6	1	4	2897				356	356	356	81f6f292c45231c81cff920b572a826a_4002	d5a5a6aae91cabb186fe594057e8ea03_4062	ea50daa39c6c4a0574d509aa68b507b7_756	4cb190364575d751463119e92857d019_3839	E_coli_7_00552	4840fb5d2d4897d217f65ba1ef1b22a7_4445
citD		citrate lyase acyl carrier protein	6	6	1	4	5396				296	296	296	81f6f292c45231c81cff920b572a826a_6423	d5a5a6aae91cabb186fe594057e8ea03_6743	ea50daa39c6c4a0574d509aa68b507b7_3363	4cb190364575d751463119e92857d019_6397	E_coli_7_01344	4840fb5d2d4897d217f65ba1ef1b22a7_6957
ygbL		aldolase	6	6	1	4	1046				638	638	638	81f6f292c45231c81cff920b572a826a_2089	d5a5a6aae91cabb186fe594057e8ea03_2190	ea50daa39c6c4a0574d509aa68b507b7_8302	4cb190364575d751463119e92857d019_2094	E_coli_7_02702	4840fb5d2d4897d217f65ba1ef1b22a7_2628
crr		PTS glucose transporter subunit IIA	6	6	1	4	4013				509	509	509	81f6f292c45231c81cff920b572a826a_2681	d5a5a6aae91cabb186fe594057e8ea03_2780	ea50daa39c6c4a0574d509aa68b507b7_8946	4cb190364575d751463119e92857d019_2685	E_coli_7_04547	4840fb5d2d4897d217f65ba1ef1b22a7_3272
tdcE		2-ketobutyrate formate-lyase/pyruvate formate-lyase	6	6	1	4	5909				2294	2294	2294	81f6f292c45231c81cff920b572a826a_1198	d5a5a6aae91cabb186fe594057e8ea03_1193	ea50daa39c6c4a0574d509aa68b507b7_7357	4cb190364575d751463119e92857d019_1210	E_coli_7_03856	4840fb5d2d4897d217f65ba1ef1b22a7_1759
folE		GTP cyclohydrolase I FolE	6	6	1	4	4267				668	668	668	81f6f292c45231c81cff920b572a826a_3204	d5a5a6aae91cabb186fe594057e8ea03_3273	ea50daa39c6c4a0574d509aa68b507b7_9427	4cb190364575d751463119e92857d019_3177	E_coli_7_00234	4840fb5d2d4897d217f65ba1ef1b22a7_3763
galR		HTH-type transcriptional regulator GalR	6	6	1	4	6220				1031	1031	1031	81f6f292c45231c81cff920b572a826a_1822	d5a5a6aae91cabb186fe594057e8ea03_1919	ea50daa39c6c4a0574d509aa68b507b7_8079	4cb190364575d751463119e92857d019_1834	E_coli_7_02399	4840fb5d2d4897d217f65ba1ef1b22a7_2375
ompX		outer membrane protein OmpX	6	6	1	4	15				515	515	515	81f6f292c45231c81cff920b572a826a_5991	d5a5a6aae91cabb186fe594057e8ea03_6335	ea50daa39c6c4a0574d509aa68b507b7_2957	4cb190364575d751463119e92857d019_5965	E_coli_7_03316	4840fb5d2d4897d217f65ba1ef1b22a7_6552
yihN		MFS transporter	6	6	1	4	2107				1265	1265	1265	81f6f292c45231c81cff920b572a826a_8941	d5a5a6aae91cabb186fe594057e8ea03_9376	ea50daa39c6c4a0574d509aa68b507b7_5782	4cb190364575d751463119e92857d019_9015	E_coli_7_03993	4840fb5d2d4897d217f65ba1ef1b22a7_202
yidH		YidH family protein	6	6	1	4	5214				347	347	347	81f6f292c45231c81cff920b572a826a_54	d5a5a6aae91cabb186fe594057e8ea03_54	ea50daa39c6c4a0574d509aa68b507b7_6236	4cb190364575d751463119e92857d019_54	E_coli_7_02923	4840fb5d2d4897d217f65ba1ef1b22a7_628
nagD		ribonucleotide monophosphatase NagD	6	6	1	4	5350				752	752	752	81f6f292c45231c81cff920b572a826a_6310	d5a5a6aae91cabb186fe594057e8ea03_6630	ea50daa39c6c4a0574d509aa68b507b7_3250	4cb190364575d751463119e92857d019_6284	E_coli_7_01291	4840fb5d2d4897d217f65ba1ef1b22a7_6844
sxy		CRP-S regulon transcriptional coactivator Sxy	6	6	1	4	3499				629	629	629	81f6f292c45231c81cff920b572a826a_5692	d5a5a6aae91cabb186fe594057e8ea03_6040	ea50daa39c6c4a0574d509aa68b507b7_2662	4cb190364575d751463119e92857d019_5666	E_coli_7_03085	4840fb5d2d4897d217f65ba1ef1b22a7_6257
yebE		tellurite resistance TerB family protein	6	6	1	4	2898				659	659	659	81f6f292c45231c81cff920b572a826a_4004	d5a5a6aae91cabb186fe594057e8ea03_4064	ea50daa39c6c4a0574d509aa68b507b7_758	4cb190364575d751463119e92857d019_3841	E_coli_7_00555	4840fb5d2d4897d217f65ba1ef1b22a7_4447
ridA		2-iminobutanoate/2-iminopropanoate deaminase	6	6	1	4	627				386	386	386	81f6f292c45231c81cff920b572a826a_8112	d5a5a6aae91cabb186fe594057e8ea03_8311	ea50daa39c6c4a0574d509aa68b507b7_4887	4cb190364575d751463119e92857d019_8188	E_coli_7_04424	4840fb5d2d4897d217f65ba1ef1b22a7_8552
yihA		ribosome biogenesis GTP-binding protein YihA/YsxC	6	6	1	4	2096				632	632	632	81f6f292c45231c81cff920b572a826a_8963	d5a5a6aae91cabb186fe594057e8ea03_9396	ea50daa39c6c4a0574d509aa68b507b7_5802	4cb190364575d751463119e92857d019_9037	E_coli_7_03983	4840fb5d2d4897d217f65ba1ef1b22a7_224
ybhQ		YbhQ family protein	6	6	1	4	109				410	410	410	81f6f292c45231c81cff920b572a826a_6041	d5a5a6aae91cabb186fe594057e8ea03_6385	ea50daa39c6c4a0574d509aa68b507b7_3005	4cb190364575d751463119e92857d019_6015	E_coli_7_03293	4840fb5d2d4897d217f65ba1ef1b22a7_6604
yqjC		DUF1090 domain-containing protein	6	6	1	4	5924				368	368	368	81f6f292c45231c81cff920b572a826a_1228	d5a5a6aae91cabb186fe594057e8ea03_1223	ea50daa39c6c4a0574d509aa68b507b7_7387	4cb190364575d751463119e92857d019_1240	E_coli_7_03871	4840fb5d2d4897d217f65ba1ef1b22a7_1789
glxR		2-hydroxy-3-oxopropionate reductase	6	6	1	4	5623				878	878	878	81f6f292c45231c81cff920b572a826a_6582	d5a5a6aae91cabb186fe594057e8ea03_6935	ea50daa39c6c4a0574d509aa68b507b7_3544	4cb190364575d751463119e92857d019_6556	E_coli_7_01423	4840fb5d2d4897d217f65ba1ef1b22a7_7126
cysZ		sulfate transporter CysZ	6	6	1	4	4017				761	761	761	81f6f292c45231c81cff920b572a826a_2689	d5a5a6aae91cabb186fe594057e8ea03_2788	ea50daa39c6c4a0574d509aa68b507b7_8954	4cb190364575d751463119e92857d019_2693	E_coli_7_04551	4840fb5d2d4897d217f65ba1ef1b22a7_3280
yrdA		gamma carbonic anhydrase family protein	6	6	1	4	157				554	554	554	81f6f292c45231c81cff920b572a826a_866	d5a5a6aae91cabb186fe594057e8ea03_863	ea50daa39c6c4a0574d509aa68b507b7_7029	4cb190364575d751463119e92857d019_876	E_coli_7_01580	4840fb5d2d4897d217f65ba1ef1b22a7_1429
rpsK		30S ribosomal protein S11	6	6	1	4	139				389	389	389	81f6f292c45231c81cff920b572a826a_830	d5a5a6aae91cabb186fe594057e8ea03_827	ea50daa39c6c4a0574d509aa68b507b7_6993	4cb190364575d751463119e92857d019_840	E_coli_7_01598	4840fb5d2d4897d217f65ba1ef1b22a7_1393
hpaE		5-carboxymethyl-2-hydroxymuconate semialdehyde dehydrogenase	6	6	1	4	1409				1466	1466	1466	81f6f292c45231c81cff920b572a826a_7811	d5a5a6aae91cabb186fe594057e8ea03_8143	ea50daa39c6c4a0574d509aa68b507b7_4731	4cb190364575d751463119e92857d019_7849	E_coli_7_01021	4840fb5d2d4897d217f65ba1ef1b22a7_8389
deoB		phosphopentomutase	6	6	1	4	1453				1223	1223	1223	81f6f292c45231c81cff920b572a826a_7748	d5a5a6aae91cabb186fe594057e8ea03_8074	ea50daa39c6c4a0574d509aa68b507b7_4662	4cb190364575d751463119e92857d019_7676	E_coli_7_01054	4840fb5d2d4897d217f65ba1ef1b22a7_8320
plaP		putrescine/proton symporter PlaP	6	6	1	4	1769				1358	1358	1358	81f6f292c45231c81cff920b572a826a_3589	d5a5a6aae91cabb186fe594057e8ea03_3559	ea50daa39c6c4a0574d509aa68b507b7_208	4cb190364575d751463119e92857d019_3535	E_coli_7_00367	4840fb5d2d4897d217f65ba1ef1b22a7_4127
nadC		carboxylating nicotinate-nucleotide diphosphorylase	6	6	1	4	474				893	893	893	81f6f292c45231c81cff920b572a826a_7492	d5a5a6aae91cabb186fe594057e8ea03_7814	ea50daa39c6c4a0574d509aa68b507b7_4388	4cb190364575d751463119e92857d019_7420	E_coli_7_01175	4840fb5d2d4897d217f65ba1ef1b22a7_8060
sirB1		invasion regulator SirB1	6	6	1	4	4485				809	809	809	81f6f292c45231c81cff920b572a826a_5237	d5a5a6aae91cabb186fe594057e8ea03_5370	ea50daa39c6c4a0574d509aa68b507b7_2189	4cb190364575d751463119e92857d019_5210	E_coli_7_02087	4840fb5d2d4897d217f65ba1ef1b22a7_5778
uraA		uracil permease	6	6	1	4	3934				1289	1289	1289	81f6f292c45231c81cff920b572a826a_2533	d5a5a6aae91cabb186fe594057e8ea03_2632	ea50daa39c6c4a0574d509aa68b507b7_8764	4cb190364575d751463119e92857d019_2537	E_coli_7_03478	4840fb5d2d4897d217f65ba1ef1b22a7_3124
yihY		virulence factor BrkB family protein	6	6	1	4	2084				872	872	872	81f6f292c45231c81cff920b572a826a_8915	d5a5a6aae91cabb186fe594057e8ea03_9354	ea50daa39c6c4a0574d509aa68b507b7_5758	4cb190364575d751463119e92857d019_8989	E_coli_7_04003	4840fb5d2d4897d217f65ba1ef1b22a7_178
yhbS		N-acetyltransferase	6	6	1	4	267				503	503	503	81f6f292c45231c81cff920b572a826a_1111	d5a5a6aae91cabb186fe594057e8ea03_1104	ea50daa39c6c4a0574d509aa68b507b7_7270	4cb190364575d751463119e92857d019_1121	E_coli_7_03577	4840fb5d2d4897d217f65ba1ef1b22a7_1670
sapB		putrescine ABC transporter permease SapB	6	6	1	4	4573				965	965	965	81f6f292c45231c81cff920b572a826a_5050	d5a5a6aae91cabb186fe594057e8ea03_5187	ea50daa39c6c4a0574d509aa68b507b7_1896	4cb190364575d751463119e92857d019_5021	E_coli_7_02001	4840fb5d2d4897d217f65ba1ef1b22a7_5599
hemY		protoheme IX biogenesis protein HemY	6	6	1	4	1177				1196	1196	1196	81f6f292c45231c81cff920b572a826a_9090	d5a5a6aae91cabb186fe594057e8ea03_9525	ea50daa39c6c4a0574d509aa68b507b7_5929	4cb190364575d751463119e92857d019_9164	E_coli_7_04253	4840fb5d2d4897d217f65ba1ef1b22a7_359
rpsT		30S ribosomal protein S20	6	6	1	4	448				263	263	263	81f6f292c45231c81cff920b572a826a_7665	d5a5a6aae91cabb186fe594057e8ea03_7985	ea50daa39c6c4a0574d509aa68b507b7_4535	4cb190364575d751463119e92857d019_7591	E_coli_7_01094	4840fb5d2d4897d217f65ba1ef1b22a7_8237
gcvH		glycine cleavage system protein GcvH	6	6	1	4	6147				389	389	389	81f6f292c45231c81cff920b572a826a_1668	d5a5a6aae91cabb186fe594057e8ea03_1759	ea50daa39c6c4a0574d509aa68b507b7_7923	4cb190364575d751463119e92857d019_1680	E_coli_7_02478	4840fb5d2d4897d217f65ba1ef1b22a7_2221
csgG		curli production assembly/transport protein CsgG	6	6	1	4	4328				833	833	833	81f6f292c45231c81cff920b572a826a_5547	d5a5a6aae91cabb186fe594057e8ea03_5798	ea50daa39c6c4a0574d509aa68b507b7_2505	4cb190364575d751463119e92857d019_5524	E_coli_7_03018	4840fb5d2d4897d217f65ba1ef1b22a7_6092
purR		HTH-type transcriptional repressor PurR	6	6	1	4	3089				1025	1025	1025	81f6f292c45231c81cff920b572a826a_4392	d5a5a6aae91cabb186fe594057e8ea03_4440	ea50daa39c6c4a0574d509aa68b507b7_1152	4cb190364575d751463119e92857d019_4233	E_coli_7_00743	4840fb5d2d4897d217f65ba1ef1b22a7_4843
trpD		bifunctional anthranilate synthase glutamate amidotransferase component TrpG/anthranilate phosphoribosyltransferase TrpD	6	6	1	4	4536				1595	1595	1595	81f6f292c45231c81cff920b572a826a_5127	d5a5a6aae91cabb186fe594057e8ea03_5258	ea50daa39c6c4a0574d509aa68b507b7_1965	4cb190364575d751463119e92857d019_5098	E_coli_7_02036	4840fb5d2d4897d217f65ba1ef1b22a7_5670
hicB		type II toxin-antitoxin system antitoxin HicB	6	6	1	4	4685				416	437	419	81f6f292c45231c81cff920b572a826a_4826	d5a5a6aae91cabb186fe594057e8ea03_4957	ea50daa39c6c4a0574d509aa68b507b7_1674	4cb190364575d751463119e92857d019_4797	E_coli_7_01892	4840fb5d2d4897d217f65ba1ef1b22a7_5373
gudP		galactarate/glucarate/glycerate transporter GudP	6	6	1	4	6292				1352	1352	1352	81f6f292c45231c81cff920b572a826a_1983	d5a5a6aae91cabb186fe594057e8ea03_2076	ea50daa39c6c4a0574d509aa68b507b7_8188	4cb190364575d751463119e92857d019_1988	E_coli_7_02754	4840fb5d2d4897d217f65ba1ef1b22a7_2522
yjiL		putative 2-hydroxyacyl-CoA dehydratase activator YjiL	6	6	1	4	1379				767	767	767	81f6f292c45231c81cff920b572a826a_7866	d5a5a6aae91cabb186fe594057e8ea03_8181	ea50daa39c6c4a0574d509aa68b507b7_4769	4cb190364575d751463119e92857d019_7901	E_coli_7_00996	4840fb5d2d4897d217f65ba1ef1b22a7_8427
pal		peptidoglycan-associated lipoprotein Pal	6	6	1	4	65				521	521	521	81f6f292c45231c81cff920b572a826a_6152	d5a5a6aae91cabb186fe594057e8ea03_6498	ea50daa39c6c4a0574d509aa68b507b7_3118	4cb190364575d751463119e92857d019_6126	E_coli_7_03243	4840fb5d2d4897d217f65ba1ef1b22a7_6714
zapG		Z-ring associated protein ZapG	6	6	1	4	196				398	398	398	81f6f292c45231c81cff920b572a826a_963	d5a5a6aae91cabb186fe594057e8ea03_958	ea50daa39c6c4a0574d509aa68b507b7_7124	4cb190364575d751463119e92857d019_973	E_coli_7_03648	4840fb5d2d4897d217f65ba1ef1b22a7_1524
rplE		50S ribosomal protein L5	6	6	1	4	128				539	539	539	81f6f292c45231c81cff920b572a826a_808	d5a5a6aae91cabb186fe594057e8ea03_805	ea50daa39c6c4a0574d509aa68b507b7_6971	4cb190364575d751463119e92857d019_818	E_coli_7_01609	4840fb5d2d4897d217f65ba1ef1b22a7_1371
ydgH		DUF1471 family protein YdgH	6	6	1	4	3145				944	944	944	81f6f292c45231c81cff920b572a826a_4504	d5a5a6aae91cabb186fe594057e8ea03_4552	ea50daa39c6c4a0574d509aa68b507b7_1264	4cb190364575d751463119e92857d019_4345	E_coli_7_00799	4840fb5d2d4897d217f65ba1ef1b22a7_4955
sucC		ADP-forming succinate--CoA ligase subunit beta	6	6	1	4	51				1166	1166	1166	81f6f292c45231c81cff920b572a826a_6180	d5a5a6aae91cabb186fe594057e8ea03_6526	ea50daa39c6c4a0574d509aa68b507b7_3146	4cb190364575d751463119e92857d019_6154	E_coli_7_03229	4840fb5d2d4897d217f65ba1ef1b22a7_6742
hpf		ribosome hibernation promoting factor	6	6	1	4	221				287	287	287	81f6f292c45231c81cff920b572a826a_1013	d5a5a6aae91cabb186fe594057e8ea03_1006	ea50daa39c6c4a0574d509aa68b507b7_7172	4cb190364575d751463119e92857d019_1023	E_coli_7_03624	4840fb5d2d4897d217f65ba1ef1b22a7_1572
zntR		Zn(2+)-responsive transcriptional regulator	6	6	1	4	144				425	425	425	81f6f292c45231c81cff920b572a826a_840	d5a5a6aae91cabb186fe594057e8ea03_837	ea50daa39c6c4a0574d509aa68b507b7_7003	4cb190364575d751463119e92857d019_850	E_coli_7_01593	4840fb5d2d4897d217f65ba1ef1b22a7_1403
lgt		prolipoprotein diacylglyceryl transferase	6	6	1	4	6229				875	875	875	81f6f292c45231c81cff920b572a826a_1840	d5a5a6aae91cabb186fe594057e8ea03_1937	ea50daa39c6c4a0574d509aa68b507b7_8097	4cb190364575d751463119e92857d019_1852	E_coli_7_02389	4840fb5d2d4897d217f65ba1ef1b22a7_2393
yncJ		YncJ family protein	6	6	1	4	4683				170	230	220	81f6f292c45231c81cff920b572a826a_4830	d5a5a6aae91cabb186fe594057e8ea03_4961	ea50daa39c6c4a0574d509aa68b507b7_1678	4cb190364575d751463119e92857d019_4801	E_coli_7_01894	4840fb5d2d4897d217f65ba1ef1b22a7_5377
flgB		flagellar basal body rod protein FlgB	6	6	1	4	4363				416	416	416	81f6f292c45231c81cff920b572a826a_5477	d5a5a6aae91cabb186fe594057e8ea03_5728	ea50daa39c6c4a0574d509aa68b507b7_2435	4cb190364575d751463119e92857d019_5454	E_coli_7_03827	4840fb5d2d4897d217f65ba1ef1b22a7_6022
gmk		guanylate kinase	6	6	1	4	5243				623	623	623	81f6f292c45231c81cff920b572a826a_121	d5a5a6aae91cabb186fe594057e8ea03_117	ea50daa39c6c4a0574d509aa68b507b7_6299	4cb190364575d751463119e92857d019_119	E_coli_7_02893	4840fb5d2d4897d217f65ba1ef1b22a7_695
eutB		ethanolamine ammonia-lyase subunit alpha	6	6	1	4	3990				1361	1361	1361	81f6f292c45231c81cff920b572a826a_2635	d5a5a6aae91cabb186fe594057e8ea03_2734	ea50daa39c6c4a0574d509aa68b507b7_8900	4cb190364575d751463119e92857d019_2639	E_coli_7_03532	4840fb5d2d4897d217f65ba1ef1b22a7_3226
nusG		transcription termination/antitermination protein NusG	6	6	1	4	708				545	545	545	81f6f292c45231c81cff920b572a826a_8704	d5a5a6aae91cabb186fe594057e8ea03_9143	ea50daa39c6c4a0574d509aa68b507b7_5549	4cb190364575d751463119e92857d019_8778	E_coli_7_04473	4840fb5d2d4897d217f65ba1ef1b22a7_9100
WP_001245988.1		minor pilin and initiator	6	6	1	4	5932				1088	1088	1088	81f6f292c45231c81cff920b572a826a_1244	d5a5a6aae91cabb186fe594057e8ea03_1241	ea50daa39c6c4a0574d509aa68b507b7_7401	4cb190364575d751463119e92857d019_1256	E_coli_7_03878	4840fb5d2d4897d217f65ba1ef1b22a7_1805
yccJ		YccJ family protein	6	6	1	4	3545				227	227	227	81f6f292c45231c81cff920b572a826a_5599	d5a5a6aae91cabb186fe594057e8ea03_5947	ea50daa39c6c4a0574d509aa68b507b7_2569	4cb190364575d751463119e92857d019_5573	E_coli_7_03042	4840fb5d2d4897d217f65ba1ef1b22a7_6164
yqhA		TIGR00645 family protein	6	6	1	4	6021				494	494	494	81f6f292c45231c81cff920b572a826a_1418	d5a5a6aae91cabb186fe594057e8ea03_1511	ea50daa39c6c4a0574d509aa68b507b7_7575	4cb190364575d751463119e92857d019_1438	E_coli_7_03961	4840fb5d2d4897d217f65ba1ef1b22a7_1979
nirD		nitrite reductase small subunit NirD	6	6	1	4	4897				326	326	326	81f6f292c45231c81cff920b572a826a_690	d5a5a6aae91cabb186fe594057e8ea03_715	ea50daa39c6c4a0574d509aa68b507b7_6881	4cb190364575d751463119e92857d019_700	E_coli_7_01668	4840fb5d2d4897d217f65ba1ef1b22a7_1281
ykgO		type B 50S ribosomal protein L36	6	6	1	4	5849				140	140	140	81f6f292c45231c81cff920b572a826a_6994	d5a5a6aae91cabb186fe594057e8ea03_7363	ea50daa39c6c4a0574d509aa68b507b7_3934	4cb190364575d751463119e92857d019_6970	E_coli_7_04127	4840fb5d2d4897d217f65ba1ef1b22a7_7552
wzb		low molecular weight protein-tyrosine-phosphatase Wzb	6	6	1	4	3702				443	443	443	81f6f292c45231c81cff920b572a826a_3467	d5a5a6aae91cabb186fe594057e8ea03_3462	ea50daa39c6c4a0574d509aa68b507b7_119	4cb190364575d751463119e92857d019_3440	E_coli_7_00320	4840fb5d2d4897d217f65ba1ef1b22a7_4028
ydcO		BenE family transporter YdcO	6	6	1	4	4680				1175	1214	1188	81f6f292c45231c81cff920b572a826a_4836	d5a5a6aae91cabb186fe594057e8ea03_4967	ea50daa39c6c4a0574d509aa68b507b7_1684	4cb190364575d751463119e92857d019_4807	E_coli_7_01897	4840fb5d2d4897d217f65ba1ef1b22a7_5383
yicG		trimeric intracellular cation channel family protein	6	6	1	4	5245				617	617	617	81f6f292c45231c81cff920b572a826a_125	d5a5a6aae91cabb186fe594057e8ea03_121	ea50daa39c6c4a0574d509aa68b507b7_6303	4cb190364575d751463119e92857d019_123	E_coli_7_02891	4840fb5d2d4897d217f65ba1ef1b22a7_699
yhaH		DUF805 domain-containing protein	6	6	1	4	5918				365	365	365	81f6f292c45231c81cff920b572a826a_1216	d5a5a6aae91cabb186fe594057e8ea03_1211	ea50daa39c6c4a0574d509aa68b507b7_7375	4cb190364575d751463119e92857d019_1228	E_coli_7_03865	4840fb5d2d4897d217f65ba1ef1b22a7_1777
yfaE		ferredoxin-like diferric-tyrosyl radical cofactor maintenance protein YfaE	6	6	1	4	4191				254	254	254	81f6f292c45231c81cff920b572a826a_3037	d5a5a6aae91cabb186fe594057e8ea03_3118	ea50daa39c6c4a0574d509aa68b507b7_9274	4cb190364575d751463119e92857d019_3026	E_coli_7_00158	4840fb5d2d4897d217f65ba1ef1b22a7_3610
ydjA		NAD(P)H nitroreductase	6	6	1	4	2982				551	551	551	81f6f292c45231c81cff920b572a826a_4172	d5a5a6aae91cabb186fe594057e8ea03_4216	ea50daa39c6c4a0574d509aa68b507b7_930	4cb190364575d751463119e92857d019_4009	E_coli_7_00635	4840fb5d2d4897d217f65ba1ef1b22a7_4619
arnF		4-amino-4-deoxy-L-arabinose-phosphoundecaprenol flippase subunit ArnF	6	6	1	4	4170				386	386	386	81f6f292c45231c81cff920b572a826a_2995	d5a5a6aae91cabb186fe594057e8ea03_3078	ea50daa39c6c4a0574d509aa68b507b7_9234	4cb190364575d751463119e92857d019_2984	E_coli_7_00138	4840fb5d2d4897d217f65ba1ef1b22a7_3568
betT		choline BCCT transporter BetT	6	6	1	4	5869				2033	2033	2033	81f6f292c45231c81cff920b572a826a_6958	d5a5a6aae91cabb186fe594057e8ea03_7329	ea50daa39c6c4a0574d509aa68b507b7_3900	4cb190364575d751463119e92857d019_6934	E_coli_7_04111	4840fb5d2d4897d217f65ba1ef1b22a7_7516
bamE		outer membrane protein assembly factor BamE	6	6	1	4	4304				341	341	341	81f6f292c45231c81cff920b572a826a_2280	d5a5a6aae91cabb186fe594057e8ea03_2381	ea50daa39c6c4a0574d509aa68b507b7_8517	4cb190364575d751463119e92857d019_2284	E_coli_7_02608	4840fb5d2d4897d217f65ba1ef1b22a7_2841
lsrK		autoinducer-2 kinase	6	6	1	4	3235				1592	1592	1592	81f6f292c45231c81cff920b572a826a_4638	d5a5a6aae91cabb186fe594057e8ea03_4791	ea50daa39c6c4a0574d509aa68b507b7_1510	4cb190364575d751463119e92857d019_4601	E_coli_7_00863	4840fb5d2d4897d217f65ba1ef1b22a7_5205
yaiY		YaiY family protein	6	6	1	4	5493				308	308	308	81f6f292c45231c81cff920b572a826a_6838	d5a5a6aae91cabb186fe594057e8ea03_7203	ea50daa39c6c4a0574d509aa68b507b7_3810	4cb190364575d751463119e92857d019_6810	E_coli_7_01546	4840fb5d2d4897d217f65ba1ef1b22a7_7394
srlD		sorbitol-6-phosphate dehydrogenase	6	6	1	4	1083				779	779	779	81f6f292c45231c81cff920b572a826a_2161	d5a5a6aae91cabb186fe594057e8ea03_2262	ea50daa39c6c4a0574d509aa68b507b7_8370	4cb190364575d751463119e92857d019_2162	E_coli_7_02666	4840fb5d2d4897d217f65ba1ef1b22a7_2700
opgD		glucan biosynthesis protein OpgD	6	6	1	4	4672				1619	1655	1649	81f6f292c45231c81cff920b572a826a_4854	d5a5a6aae91cabb186fe594057e8ea03_4985	ea50daa39c6c4a0574d509aa68b507b7_1702	4cb190364575d751463119e92857d019_4825	E_coli_7_01905	4840fb5d2d4897d217f65ba1ef1b22a7_5401
yaiZ		DUF2754 domain-containing protein	6	6	1	4	5494				212	212	212	81f6f292c45231c81cff920b572a826a_6836	d5a5a6aae91cabb186fe594057e8ea03_7201	ea50daa39c6c4a0574d509aa68b507b7_3808	4cb190364575d751463119e92857d019_6808	E_coli_7_01545	4840fb5d2d4897d217f65ba1ef1b22a7_7392
syd		SecY-interacting protein	6	6	1	4	6288				545	545	545	81f6f292c45231c81cff920b572a826a_1975	d5a5a6aae91cabb186fe594057e8ea03_2068	ea50daa39c6c4a0574d509aa68b507b7_8180	4cb190364575d751463119e92857d019_1980	E_coli_7_02758	4840fb5d2d4897d217f65ba1ef1b22a7_2514
hupA		DNA-binding protein HU-alpha	6	6	1	4	727				272	272	272	81f6f292c45231c81cff920b572a826a_8667	d5a5a6aae91cabb186fe594057e8ea03_9104	ea50daa39c6c4a0574d509aa68b507b7_5510	4cb190364575d751463119e92857d019_8741	E_coli_7_04492	4840fb5d2d4897d217f65ba1ef1b22a7_9061
chbA		PTS N,N'-diacetylchitobiose transporter subunit IIA	6	6	1	4	3013				350	350	350	81f6f292c45231c81cff920b572a826a_4228	d5a5a6aae91cabb186fe594057e8ea03_4274	ea50daa39c6c4a0574d509aa68b507b7_988	4cb190364575d751463119e92857d019_4069	E_coli_7_00664	4840fb5d2d4897d217f65ba1ef1b22a7_4677
ydfG		bifunctional NADP-dependent 3-hydroxy acid dehydrogenase/3-hydroxypropionate dehydrogenase YdfG	6	6	1	4	3199				746	746	746	81f6f292c45231c81cff920b572a826a_4566	d5a5a6aae91cabb186fe594057e8ea03_4714	ea50daa39c6c4a0574d509aa68b507b7_1440	4cb190364575d751463119e92857d019_4529	E_coli_7_00828	4840fb5d2d4897d217f65ba1ef1b22a7_5133
rpmF		50S ribosomal protein L32	6	6	1	4	4378				173	173	173	81f6f292c45231c81cff920b572a826a_5447	d5a5a6aae91cabb186fe594057e8ea03_5698	ea50daa39c6c4a0574d509aa68b507b7_2405	4cb190364575d751463119e92857d019_5424	E_coli_7_03812	4840fb5d2d4897d217f65ba1ef1b22a7_5992
malI		mal regulon transcriptional regulator MalI	6	6	1	4	3129				1028	1028	1028	81f6f292c45231c81cff920b572a826a_4472	d5a5a6aae91cabb186fe594057e8ea03_4520	ea50daa39c6c4a0574d509aa68b507b7_1232	4cb190364575d751463119e92857d019_4313	E_coli_7_00783	4840fb5d2d4897d217f65ba1ef1b22a7_4923
hpaB		4-hydroxyphenylacetate 3-monooxygenase, oxygenase component	6	6	1	4	1401				1562	1562	1562	81f6f292c45231c81cff920b572a826a_7825	d5a5a6aae91cabb186fe594057e8ea03_8157	ea50daa39c6c4a0574d509aa68b507b7_4745	4cb190364575d751463119e92857d019_7863	E_coli_7_01014	4840fb5d2d4897d217f65ba1ef1b22a7_8403
soxR		redox-sensitive transcriptional activator SoxR	6	6	1	4	1498				464	464	464	81f6f292c45231c81cff920b572a826a_8474	d5a5a6aae91cabb186fe594057e8ea03_8846	ea50daa39c6c4a0574d509aa68b507b7_5251	4cb190364575d751463119e92857d019_8550	E_coli_7_02309	4840fb5d2d4897d217f65ba1ef1b22a7_8920
yagU		YagU family protein	6	6	1	4	5840				614	614	614	81f6f292c45231c81cff920b572a826a_7012	d5a5a6aae91cabb186fe594057e8ea03_7381	ea50daa39c6c4a0574d509aa68b507b7_3952	4cb190364575d751463119e92857d019_6988	E_coli_7_04134	4840fb5d2d4897d217f65ba1ef1b22a7_7570
ynbC		bifunctional alpha/beta hydrolase/class I SAM-dependent methyltransferase	6	6	1	4	4658				1757	1757	1757	81f6f292c45231c81cff920b572a826a_4882	d5a5a6aae91cabb186fe594057e8ea03_5013	ea50daa39c6c4a0574d509aa68b507b7_1728	4cb190364575d751463119e92857d019_4853	E_coli_7_01918	4840fb5d2d4897d217f65ba1ef1b22a7_5429
cyoE		heme o synthase	6	6	1	4	5547				890	890	890	81f6f292c45231c81cff920b572a826a_6738	d5a5a6aae91cabb186fe594057e8ea03_7099	ea50daa39c6c4a0574d509aa68b507b7_3706	4cb190364575d751463119e92857d019_6712	E_coli_7_01498	4840fb5d2d4897d217f65ba1ef1b22a7_7290
yieP		FadR family transcriptional regulator	6	6	1	4	1228				692	692	692	81f6f292c45231c81cff920b572a826a_9192	d5a5a6aae91cabb186fe594057e8ea03_9627	ea50daa39c6c4a0574d509aa68b507b7_6067	4cb190364575d751463119e92857d019_9266	E_coli_7_03005	4840fb5d2d4897d217f65ba1ef1b22a7_461
ypfN		YpfN family protein	6	6	1	4	3961				200	200	200	81f6f292c45231c81cff920b572a826a_2587	d5a5a6aae91cabb186fe594057e8ea03_2686	ea50daa39c6c4a0574d509aa68b507b7_8818	4cb190364575d751463119e92857d019_2591	E_coli_7_03509	4840fb5d2d4897d217f65ba1ef1b22a7_3178
group_3733	narH	nitrate reductase subunit beta	6	6	1	4	3280				1544	1544	1544	81f6f292c45231c81cff920b572a826a_4730	d5a5a6aae91cabb186fe594057e8ea03_4885	ea50daa39c6c4a0574d509aa68b507b7_1600	4cb190364575d751463119e92857d019_4701	E_coli_7_00908	4840fb5d2d4897d217f65ba1ef1b22a7_5297
rlmN		bifunctional tRNA (adenosine(37)-C2)-methyltransferase TrmG/ribosomal RNA large subunit methyltransferase RlmN	6	6	1	4	3899				1154	1154	1154	81f6f292c45231c81cff920b572a826a_2491	d5a5a6aae91cabb186fe594057e8ea03_2590	ea50daa39c6c4a0574d509aa68b507b7_8722	4cb190364575d751463119e92857d019_2495	E_coli_7_03457	4840fb5d2d4897d217f65ba1ef1b22a7_3050
yohC		YIP1 family protein	6	6	1	4	3776				587	587	587	81f6f292c45231c81cff920b572a826a_3238	d5a5a6aae91cabb186fe594057e8ea03_3307	ea50daa39c6c4a0574d509aa68b507b7_9463	4cb190364575d751463119e92857d019_3211	E_coli_7_00251	4840fb5d2d4897d217f65ba1ef1b22a7_3797
yjiX		YbdD/YjiX family protein	6	6	1	4	1398				203	203	203	81f6f292c45231c81cff920b572a826a_7831	d5a5a6aae91cabb186fe594057e8ea03_8163	ea50daa39c6c4a0574d509aa68b507b7_4751	4cb190364575d751463119e92857d019_7869	E_coli_7_01011	4840fb5d2d4897d217f65ba1ef1b22a7_8409
csiR		DNA-binding transcriptional regulator CsiR	6	6	1	4	3566				662	662	662	81f6f292c45231c81cff920b572a826a_2246	d5a5a6aae91cabb186fe594057e8ea03_2347	ea50daa39c6c4a0574d509aa68b507b7_8483	4cb190364575d751463119e92857d019_2247	E_coli_7_02625	4840fb5d2d4897d217f65ba1ef1b22a7_2785
ihfA		integration host factor subunit alpha	6	6	1	4	3037				299	299	299	81f6f292c45231c81cff920b572a826a_4277	d5a5a6aae91cabb186fe594057e8ea03_4325	ea50daa39c6c4a0574d509aa68b507b7_1039	4cb190364575d751463119e92857d019_4118	E_coli_7_00688	4840fb5d2d4897d217f65ba1ef1b22a7_4728
yhhN		lysoplasmalogenase	6	6	1	4	5002				626	626	626	81f6f292c45231c81cff920b572a826a_500	d5a5a6aae91cabb186fe594057e8ea03_507	ea50daa39c6c4a0574d509aa68b507b7_6685	4cb190364575d751463119e92857d019_498	E_coli_7_01774	4840fb5d2d4897d217f65ba1ef1b22a7_1083
group_374	paaC	3-hydroxyacyl-CoA dehydrogenase PaaC	6	6	1	4	4648				1382	1427	1419	81f6f292c45231c81cff920b572a826a_4902	d5a5a6aae91cabb186fe594057e8ea03_5033	ea50daa39c6c4a0574d509aa68b507b7_1748	4cb190364575d751463119e92857d019_4873	E_coli_7_01928	4840fb5d2d4897d217f65ba1ef1b22a7_5449
nrfA		ammonia-forming nitrite reductase cytochrome c552 subunit	6	6	1	4	1505				1436	1436	1436	81f6f292c45231c81cff920b572a826a_8460	d5a5a6aae91cabb186fe594057e8ea03_8832	ea50daa39c6c4a0574d509aa68b507b7_5237	4cb190364575d751463119e92857d019_8536	E_coli_7_02302	4840fb5d2d4897d217f65ba1ef1b22a7_8906
rpoC		DNA-directed RNA polymerase subunit beta'	6	6	1	4	715				4223	4223	4223	81f6f292c45231c81cff920b572a826a_8692	d5a5a6aae91cabb186fe594057e8ea03_9131	ea50daa39c6c4a0574d509aa68b507b7_5537	4cb190364575d751463119e92857d019_8766	E_coli_7_04479	4840fb5d2d4897d217f65ba1ef1b22a7_9088
raiA		ribosome-associated translation inhibitor RaiA	6	6	1	4	3820				341	341	341	81f6f292c45231c81cff920b572a826a_2321	d5a5a6aae91cabb186fe594057e8ea03_2420	ea50daa39c6c4a0574d509aa68b507b7_8556	4cb190364575d751463119e92857d019_2325	E_coli_7_02589	4840fb5d2d4897d217f65ba1ef1b22a7_2880
rpsU		30S ribosomal protein S21	6	6	1	4	5960				215	215	215	81f6f292c45231c81cff920b572a826a_1303	d5a5a6aae91cabb186fe594057e8ea03_1394	ea50daa39c6c4a0574d509aa68b507b7_7460	4cb190364575d751463119e92857d019_1315	E_coli_7_03906	4840fb5d2d4897d217f65ba1ef1b22a7_1864
ybaB		YbaB/EbfC family nucleoid-associated protein	6	6	1	4	5589				329	329	329	81f6f292c45231c81cff920b572a826a_6650	d5a5a6aae91cabb186fe594057e8ea03_7011	ea50daa39c6c4a0574d509aa68b507b7_3618	4cb190364575d751463119e92857d019_6624	E_coli_7_01456	4840fb5d2d4897d217f65ba1ef1b22a7_7202
zitB		CDF family zinc transporter ZitB	6	6	1	4	69				941	941	941	81f6f292c45231c81cff920b572a826a_6120	d5a5a6aae91cabb186fe594057e8ea03_6466	ea50daa39c6c4a0574d509aa68b507b7_3086	4cb190364575d751463119e92857d019_6094	E_coli_7_03254	4840fb5d2d4897d217f65ba1ef1b22a7_6685
potI		putrescine ABC transporter permease PotI	6	6	1	4	3397				845	845	845	81f6f292c45231c81cff920b572a826a_5899	d5a5a6aae91cabb186fe594057e8ea03_6247	ea50daa39c6c4a0574d509aa68b507b7_2869	4cb190364575d751463119e92857d019_5873	E_coli_7_03187	4840fb5d2d4897d217f65ba1ef1b22a7_6464
proC		pyrroline-5-carboxylate reductase	6	6	1	4	5501				809	809	809	81f6f292c45231c81cff920b572a826a_6822	d5a5a6aae91cabb186fe594057e8ea03_7187	ea50daa39c6c4a0574d509aa68b507b7_3794	4cb190364575d751463119e92857d019_6794	E_coli_7_01539	4840fb5d2d4897d217f65ba1ef1b22a7_7378
ynaJ		DUF2534 family protein	6	6	1	4	4614				257	257	257	81f6f292c45231c81cff920b572a826a_4970	d5a5a6aae91cabb186fe594057e8ea03_5101	ea50daa39c6c4a0574d509aa68b507b7_1814	4cb190364575d751463119e92857d019_4941	E_coli_7_01962	4840fb5d2d4897d217f65ba1ef1b22a7_5517
mlaE		lipid asymmetry maintenance ABC transporter permease subunit MlaE	6	6	1	4	230				782	782	782	81f6f292c45231c81cff920b572a826a_1031	d5a5a6aae91cabb186fe594057e8ea03_1024	ea50daa39c6c4a0574d509aa68b507b7_7190	4cb190364575d751463119e92857d019_1041	E_coli_7_03615	4840fb5d2d4897d217f65ba1ef1b22a7_1590
ynbE		YnbE family lipoprotein	6	6	1	4	4635				185	185	185	81f6f292c45231c81cff920b572a826a_4928	d5a5a6aae91cabb186fe594057e8ea03_5059	ea50daa39c6c4a0574d509aa68b507b7_1774	4cb190364575d751463119e92857d019_4899	E_coli_7_01941	4840fb5d2d4897d217f65ba1ef1b22a7_5475
murF		UDP-N-acetylmuramoyl-tripeptide--D-alanyl-D-alanine ligase	6	6	1	4	504				1358	1358	1358	81f6f292c45231c81cff920b572a826a_7536	d5a5a6aae91cabb186fe594057e8ea03_7858	ea50daa39c6c4a0574d509aa68b507b7_4434	4cb190364575d751463119e92857d019_7464	E_coli_7_01154	4840fb5d2d4897d217f65ba1ef1b22a7_8104
yeaQ		GlsB/YeaQ/YmgE family stress response membrane protein	6	6	1	4	2950				248	248	248	81f6f292c45231c81cff920b572a826a_4108	d5a5a6aae91cabb186fe594057e8ea03_4168	ea50daa39c6c4a0574d509aa68b507b7_866	4cb190364575d751463119e92857d019_3945	E_coli_7_00606	4840fb5d2d4897d217f65ba1ef1b22a7_4555
malK		maltose/maltodextrin ABC transporter ATP-binding protein MalK	6	6	1	4	787				1115	1115	1115	81f6f292c45231c81cff920b572a826a_8532	d5a5a6aae91cabb186fe594057e8ea03_9024	ea50daa39c6c4a0574d509aa68b507b7_5430	4cb190364575d751463119e92857d019_8608	E_coli_7_02340	4840fb5d2d4897d217f65ba1ef1b22a7_8978
tsaD		tRNA (adenosine(37)-N6)-threonylcarbamoyltransferase complex transferase subunit TsaD	6	6	1	4	5961				1013	1013	1013	81f6f292c45231c81cff920b572a826a_1305	d5a5a6aae91cabb186fe594057e8ea03_1396	ea50daa39c6c4a0574d509aa68b507b7_7462	4cb190364575d751463119e92857d019_1317	E_coli_7_03907	4840fb5d2d4897d217f65ba1ef1b22a7_1866
group_3754	nagA	N-acetylglucosamine-6-phosphate deacetylase	6	6	1	4	288				1133	1133	1133	81f6f292c45231c81cff920b572a826a_1153	d5a5a6aae91cabb186fe594057e8ea03_1146	ea50daa39c6c4a0574d509aa68b507b7_7312	4cb190364575d751463119e92857d019_1163	E_coli_7_03556	4840fb5d2d4897d217f65ba1ef1b22a7_1712
sfsA		DNA/RNA nuclease SfsA	6	6	1	4	2582				704	704	704	81f6f292c45231c81cff920b572a826a_7418	d5a5a6aae91cabb186fe594057e8ea03_7735	ea50daa39c6c4a0574d509aa68b507b7_4314	4cb190364575d751463119e92857d019_7346	E_coli_7_01212	4840fb5d2d4897d217f65ba1ef1b22a7_7986
fur		ferric iron uptake transcriptional regulator	6	6	1	4	5341				446	446	446	81f6f292c45231c81cff920b572a826a_6294	d5a5a6aae91cabb186fe594057e8ea03_6614	ea50daa39c6c4a0574d509aa68b507b7_3234	4cb190364575d751463119e92857d019_6268	E_coli_7_01282	4840fb5d2d4897d217f65ba1ef1b22a7_6828
WP_001198780.1		DUF805 domain-containing protein	6	6	1	4	5917				356	356	356	81f6f292c45231c81cff920b572a826a_1214	d5a5a6aae91cabb186fe594057e8ea03_1209	ea50daa39c6c4a0574d509aa68b507b7_7373	4cb190364575d751463119e92857d019_1226	E_coli_7_03864	4840fb5d2d4897d217f65ba1ef1b22a7_1775
dgkA		diacylglycerol kinase	6	6	1	4	796				368	368	368	81f6f292c45231c81cff920b572a826a_8518	d5a5a6aae91cabb186fe594057e8ea03_9010	ea50daa39c6c4a0574d509aa68b507b7_5416	4cb190364575d751463119e92857d019_8594	E_coli_7_02331	4840fb5d2d4897d217f65ba1ef1b22a7_8964
ygbE		DUF3561 family protein	6	6	1	4	1031				323	323	323	81f6f292c45231c81cff920b572a826a_2067	d5a5a6aae91cabb186fe594057e8ea03_2160	ea50daa39c6c4a0574d509aa68b507b7_8272	4cb190364575d751463119e92857d019_2072	E_coli_7_02713	4840fb5d2d4897d217f65ba1ef1b22a7_2606
hslJ		heat shock protein HslJ	6	6	1	4	4632				422	422	422	81f6f292c45231c81cff920b572a826a_4934	d5a5a6aae91cabb186fe594057e8ea03_5065	ea50daa39c6c4a0574d509aa68b507b7_1780	4cb190364575d751463119e92857d019_4905	E_coli_7_01944	4840fb5d2d4897d217f65ba1ef1b22a7_5481
hydN		electron transport protein HydN	6	6	1	4	1075				527	527	527	81f6f292c45231c81cff920b572a826a_2145	d5a5a6aae91cabb186fe594057e8ea03_2246	ea50daa39c6c4a0574d509aa68b507b7_8354	4cb190364575d751463119e92857d019_2146	E_coli_7_02674	4840fb5d2d4897d217f65ba1ef1b22a7_2684
lolD		lipoprotein-releasing ABC transporter ATP-binding protein LolD	6	6	1	4	4406				701	701	701	81f6f292c45231c81cff920b572a826a_5391	d5a5a6aae91cabb186fe594057e8ea03_5642	ea50daa39c6c4a0574d509aa68b507b7_2349	4cb190364575d751463119e92857d019_5368	E_coli_7_03784	4840fb5d2d4897d217f65ba1ef1b22a7_5936
glgA		glycogen synthase GlgA	6	6	1	4	4958				1433	1433	1433	81f6f292c45231c81cff920b572a826a_568	d5a5a6aae91cabb186fe594057e8ea03_587	ea50daa39c6c4a0574d509aa68b507b7_6763	4cb190364575d751463119e92857d019_578	E_coli_7_01735	4840fb5d2d4897d217f65ba1ef1b22a7_1163
hflC		protease modulator HflC	6	6	1	4	1605				1004	1004	1004	81f6f292c45231c81cff920b572a826a_8252	d5a5a6aae91cabb186fe594057e8ea03_8461	ea50daa39c6c4a0574d509aa68b507b7_5029	4cb190364575d751463119e92857d019_8328	E_coli_7_02200	4840fb5d2d4897d217f65ba1ef1b22a7_8698
pgpB		phosphatidylglycerophosphatase B	6	6	1	4	4555				764	764	764	81f6f292c45231c81cff920b572a826a_5086	d5a5a6aae91cabb186fe594057e8ea03_5223	ea50daa39c6c4a0574d509aa68b507b7_1930	4cb190364575d751463119e92857d019_5057	E_coli_7_02017	4840fb5d2d4897d217f65ba1ef1b22a7_5635
dsbE		thiol:disulfide interchange protein DsbE	6	6	1	4	4228				557	557	557	81f6f292c45231c81cff920b572a826a_3121	d5a5a6aae91cabb186fe594057e8ea03_3190	ea50daa39c6c4a0574d509aa68b507b7_9344	4cb190364575d751463119e92857d019_3094	E_coli_7_00193	4840fb5d2d4897d217f65ba1ef1b22a7_3680
nuoA		NADH-quinone oxidoreductase subunit NuoA	6	6	1	4	4145				443	443	443	81f6f292c45231c81cff920b572a826a_2943	d5a5a6aae91cabb186fe594057e8ea03_3024	ea50daa39c6c4a0574d509aa68b507b7_9182	4cb190364575d751463119e92857d019_2932	E_coli_7_00113	4840fb5d2d4897d217f65ba1ef1b22a7_3516
WP_000731833.1		periplasmic protein	6	6	1	4	4666				173	173	173	81f6f292c45231c81cff920b572a826a_4866	d5a5a6aae91cabb186fe594057e8ea03_4997	ea50daa39c6c4a0574d509aa68b507b7_1712	4cb190364575d751463119e92857d019_4837	E_coli_7_01910	4840fb5d2d4897d217f65ba1ef1b22a7_5413
mdtE		multidrug transporter subunit MdtE	6	6	1	4	5051				1157	1157	1157	81f6f292c45231c81cff920b572a826a_404	d5a5a6aae91cabb186fe594057e8ea03_411	ea50daa39c6c4a0574d509aa68b507b7_6593	4cb190364575d751463119e92857d019_402	E_coli_7_01819	4840fb5d2d4897d217f65ba1ef1b22a7_987
corA		magnesium/cobalt transporter CorA	6	6	1	4	1163				950	950	950	81f6f292c45231c81cff920b572a826a_9060	d5a5a6aae91cabb186fe594057e8ea03_9497	ea50daa39c6c4a0574d509aa68b507b7_5903	4cb190364575d751463119e92857d019_9134	E_coli_7_04266	4840fb5d2d4897d217f65ba1ef1b22a7_325
pgmB		beta-phosphoglucomutase	6	6	1	4	4598				659	659	659	81f6f292c45231c81cff920b572a826a_5000	d5a5a6aae91cabb186fe594057e8ea03_5133	ea50daa39c6c4a0574d509aa68b507b7_1846	4cb190364575d751463119e92857d019_4971	E_coli_7_01977	4840fb5d2d4897d217f65ba1ef1b22a7_5549
agaV		PTS N-acetylgalactosamine transporter subunit IIB	6	6	1	4	292				473	473	473	81f6f292c45231c81cff920b572a826a_1161	d5a5a6aae91cabb186fe594057e8ea03_1154	ea50daa39c6c4a0574d509aa68b507b7_7320	4cb190364575d751463119e92857d019_1171	E_coli_7_03552	4840fb5d2d4897d217f65ba1ef1b22a7_1720
kdgA		bifunctional 4-hydroxy-2-oxoglutarate aldolase/2-dehydro-3-deoxy-phosphogluconate aldolase	6	6	1	4	2894				641	641	641	81f6f292c45231c81cff920b572a826a_3996	d5a5a6aae91cabb186fe594057e8ea03_4056	ea50daa39c6c4a0574d509aa68b507b7_750	4cb190364575d751463119e92857d019_3833	E_coli_7_00549	4840fb5d2d4897d217f65ba1ef1b22a7_4439
yajD		HNH nuclease YajD	6	6	1	4	5527				347	347	347	81f6f292c45231c81cff920b572a826a_6774	d5a5a6aae91cabb186fe594057e8ea03_7141	ea50daa39c6c4a0574d509aa68b507b7_3748	4cb190364575d751463119e92857d019_6748	E_coli_7_01516	4840fb5d2d4897d217f65ba1ef1b22a7_7332
ubiJ		ubiquinone biosynthesis protein UbiJ	6	6	1	4	1139				605	605	605	81f6f292c45231c81cff920b572a826a_9024	d5a5a6aae91cabb186fe594057e8ea03_9457	ea50daa39c6c4a0574d509aa68b507b7_5863	4cb190364575d751463119e92857d019_9098	E_coli_7_04284	4840fb5d2d4897d217f65ba1ef1b22a7_285
mraZ		division/cell wall cluster transcriptional repressor MraZ	6	6	1	4	499				458	458	458	81f6f292c45231c81cff920b572a826a_7546	d5a5a6aae91cabb186fe594057e8ea03_7868	ea50daa39c6c4a0574d509aa68b507b7_4444	4cb190364575d751463119e92857d019_7474	E_coli_7_01149	4840fb5d2d4897d217f65ba1ef1b22a7_8114
murJ		murein biosynthesis integral membrane protein MurJ	6	6	1	4	4359				1535	1535	1535	81f6f292c45231c81cff920b572a826a_5485	d5a5a6aae91cabb186fe594057e8ea03_5736	ea50daa39c6c4a0574d509aa68b507b7_2443	4cb190364575d751463119e92857d019_5462	E_coli_7_03831	4840fb5d2d4897d217f65ba1ef1b22a7_6030
acpT		4'-phosphopantetheinyl transferase AcpT	6	6	1	4	5009				587	587	587	81f6f292c45231c81cff920b572a826a_486	d5a5a6aae91cabb186fe594057e8ea03_493	ea50daa39c6c4a0574d509aa68b507b7_6671	4cb190364575d751463119e92857d019_484	E_coli_7_01781	4840fb5d2d4897d217f65ba1ef1b22a7_1069
hycA		formate hydrogenlyase regulator HycA	6	6	1	4	1060				461	461	461	81f6f292c45231c81cff920b572a826a_2117	d5a5a6aae91cabb186fe594057e8ea03_2218	ea50daa39c6c4a0574d509aa68b507b7_8330	4cb190364575d751463119e92857d019_2122	E_coli_7_02688	4840fb5d2d4897d217f65ba1ef1b22a7_2656
cls		cardiolipin synthase	6	6	1	4	4520				1460	1460	1460	81f6f292c45231c81cff920b572a826a_5159	d5a5a6aae91cabb186fe594057e8ea03_5290	ea50daa39c6c4a0574d509aa68b507b7_2114	4cb190364575d751463119e92857d019_5130	E_coli_7_02050	4840fb5d2d4897d217f65ba1ef1b22a7_5702
pyrF		orotidine-5'-phosphate decarboxylase	6	6	1	4	4558				737	797	747	81f6f292c45231c81cff920b572a826a_5080	d5a5a6aae91cabb186fe594057e8ea03_5217	ea50daa39c6c4a0574d509aa68b507b7_1924	4cb190364575d751463119e92857d019_5051	E_coli_7_02014	4840fb5d2d4897d217f65ba1ef1b22a7_5629
sltY		murein transglycosylase	6	6	1	4	1444				1937	1937	1937	81f6f292c45231c81cff920b572a826a_7730	d5a5a6aae91cabb186fe594057e8ea03_8056	ea50daa39c6c4a0574d509aa68b507b7_4644	4cb190364575d751463119e92857d019_7658	E_coli_7_01063	4840fb5d2d4897d217f65ba1ef1b22a7_8302
sdaA		L-serine ammonia-lyase	6	6	1	4	2931				1364	1364	1364	81f6f292c45231c81cff920b572a826a_4070	d5a5a6aae91cabb186fe594057e8ea03_4130	ea50daa39c6c4a0574d509aa68b507b7_824	4cb190364575d751463119e92857d019_3907	E_coli_7_00587	4840fb5d2d4897d217f65ba1ef1b22a7_4513
nagC		DNA-binding transcriptional regulator NagC	6	6	1	4	5349				1220	1220	1220	81f6f292c45231c81cff920b572a826a_6308	d5a5a6aae91cabb186fe594057e8ea03_6628	ea50daa39c6c4a0574d509aa68b507b7_3248	4cb190364575d751463119e92857d019_6282	E_coli_7_01290	4840fb5d2d4897d217f65ba1ef1b22a7_6842
napD		chaperone NapD	6	6	1	4	4216				263	263	263	81f6f292c45231c81cff920b572a826a_3097	d5a5a6aae91cabb186fe594057e8ea03_3166	ea50daa39c6c4a0574d509aa68b507b7_9320	4cb190364575d751463119e92857d019_3070	E_coli_7_00181	4840fb5d2d4897d217f65ba1ef1b22a7_3656
bioA		adenosylmethionine--8-amino-7-oxononanoate transaminase	6	6	1	4	91				1289	1289	1289	81f6f292c45231c81cff920b572a826a_6076	d5a5a6aae91cabb186fe594057e8ea03_6422	ea50daa39c6c4a0574d509aa68b507b7_3042	4cb190364575d751463119e92857d019_6050	E_coli_7_03276	4840fb5d2d4897d217f65ba1ef1b22a7_6641
epmB		EF-P beta-lysylation protein EpmB	6	6	1	4	1578				1028	1028	1028	81f6f292c45231c81cff920b572a826a_8315	d5a5a6aae91cabb186fe594057e8ea03_8528	ea50daa39c6c4a0574d509aa68b507b7_5092	4cb190364575d751463119e92857d019_8391	E_coli_7_02229	4840fb5d2d4897d217f65ba1ef1b22a7_8761
panD		aspartate 1-decarboxylase	6	6	1	4	2600				380	380	380	81f6f292c45231c81cff920b572a826a_7448	d5a5a6aae91cabb186fe594057e8ea03_7770	ea50daa39c6c4a0574d509aa68b507b7_4344	4cb190364575d751463119e92857d019_7376	E_coli_7_01197	4840fb5d2d4897d217f65ba1ef1b22a7_8016
nuoC		NADH-quinone oxidoreductase subunit C/D	6	6	1	4	4147				1802	1802	1802	81f6f292c45231c81cff920b572a826a_2947	d5a5a6aae91cabb186fe594057e8ea03_3028	ea50daa39c6c4a0574d509aa68b507b7_9186	4cb190364575d751463119e92857d019_2936	E_coli_7_00115	4840fb5d2d4897d217f65ba1ef1b22a7_3520
narI		respiratory nitrate reductase subunit gamma	6	6	1	4	3282				680	680	680	81f6f292c45231c81cff920b572a826a_4734	d5a5a6aae91cabb186fe594057e8ea03_4889	ea50daa39c6c4a0574d509aa68b507b7_1604	4cb190364575d751463119e92857d019_4705	E_coli_7_00910	4840fb5d2d4897d217f65ba1ef1b22a7_5301
lpxM		lauroyl-Kdo(2)-lipid IV(A) myristoyltransferase	6	6	1	4	2888				971	971	971	81f6f292c45231c81cff920b572a826a_3986	d5a5a6aae91cabb186fe594057e8ea03_4046	ea50daa39c6c4a0574d509aa68b507b7_710	4cb190364575d751463119e92857d019_3823	E_coli_7_00528	4840fb5d2d4897d217f65ba1ef1b22a7_4429
cobO		cob(I)yrinic acid a,c-diamide adenosyltransferase	6	6	1	4	4544				590	590	590	81f6f292c45231c81cff920b572a826a_5108	d5a5a6aae91cabb186fe594057e8ea03_5245	ea50daa39c6c4a0574d509aa68b507b7_1952	4cb190364575d751463119e92857d019_5079	E_coli_7_02027	4840fb5d2d4897d217f65ba1ef1b22a7_5657
yecF		DUF2594 family protein	6	6	1	4	2830				224	224	224	81f6f292c45231c81cff920b572a826a_3861	d5a5a6aae91cabb186fe594057e8ea03_3919	ea50daa39c6c4a0574d509aa68b507b7_587	4cb190364575d751463119e92857d019_3698	E_coli_7_00471	4840fb5d2d4897d217f65ba1ef1b22a7_4300
rpsQ		30S ribosomal protein S17	6	6	1	4	125				254	254	254	81f6f292c45231c81cff920b572a826a_802	d5a5a6aae91cabb186fe594057e8ea03_799	ea50daa39c6c4a0574d509aa68b507b7_6965	4cb190364575d751463119e92857d019_812	E_coli_7_01612	4840fb5d2d4897d217f65ba1ef1b22a7_1365
mntS		manganase accumulation protein MntS	6	6	1	4	13				128	128	128	81f6f292c45231c81cff920b572a826a_5987	d5a5a6aae91cabb186fe594057e8ea03_6331	ea50daa39c6c4a0574d509aa68b507b7_2953	4cb190364575d751463119e92857d019_5961	E_coli_7_03318	4840fb5d2d4897d217f65ba1ef1b22a7_6548
yqiB		DUF1249 family protein	6	6	1	4	5995				422	422	422	81f6f292c45231c81cff920b572a826a_1368	d5a5a6aae91cabb186fe594057e8ea03_1459	ea50daa39c6c4a0574d509aa68b507b7_7525	4cb190364575d751463119e92857d019_1382	E_coli_7_03936	4840fb5d2d4897d217f65ba1ef1b22a7_1929
rseA		anti-sigma-E factor RseA	6	6	1	4	3842				650	650	650	81f6f292c45231c81cff920b572a826a_2377	d5a5a6aae91cabb186fe594057e8ea03_2478	ea50daa39c6c4a0574d509aa68b507b7_8610	4cb190364575d751463119e92857d019_2381	E_coli_7_03402	4840fb5d2d4897d217f65ba1ef1b22a7_2936
yqhG		YbjP/YqhG family protein	6	6	1	4	6012				926	926	926	81f6f292c45231c81cff920b572a826a_1400	d5a5a6aae91cabb186fe594057e8ea03_1491	ea50daa39c6c4a0574d509aa68b507b7_7557	4cb190364575d751463119e92857d019_1420	E_coli_7_03952	4840fb5d2d4897d217f65ba1ef1b22a7_1961
fbp		class 1 fructose-bisphosphatase	6	6	1	4	639				998	998	998	81f6f292c45231c81cff920b572a826a_8136	d5a5a6aae91cabb186fe594057e8ea03_8337	ea50daa39c6c4a0574d509aa68b507b7_4913	4cb190364575d751463119e92857d019_8214	E_coli_7_02144	4840fb5d2d4897d217f65ba1ef1b22a7_8576
nlpE		envelope stress response activation lipoprotein NlpE	6	6	1	4	523				710	710	710	81f6f292c45231c81cff920b572a826a_7324	d5a5a6aae91cabb186fe594057e8ea03_7641	ea50daa39c6c4a0574d509aa68b507b7_4222	4cb190364575d751463119e92857d019_7250	E_coli_7_01259	4840fb5d2d4897d217f65ba1ef1b22a7_7892
cysB		HTH-type transcriptional regulator CysB	6	6	1	4	4549				974	974	974	81f6f292c45231c81cff920b572a826a_5098	d5a5a6aae91cabb186fe594057e8ea03_5235	ea50daa39c6c4a0574d509aa68b507b7_1942	4cb190364575d751463119e92857d019_5069	E_coli_7_02022	4840fb5d2d4897d217f65ba1ef1b22a7_5647
fliN		flagellar motor switch protein FliN	6	6	1	4	2803				413	413	413	81f6f292c45231c81cff920b572a826a_3809	d5a5a6aae91cabb186fe594057e8ea03_3857	ea50daa39c6c4a0574d509aa68b507b7_523	4cb190364575d751463119e92857d019_3646	E_coli_7_00445	4840fb5d2d4897d217f65ba1ef1b22a7_4236
tonB		TonB system transport protein TonB	6	6	1	4	4524				719	734	721	81f6f292c45231c81cff920b572a826a_5151	d5a5a6aae91cabb186fe594057e8ea03_5282	ea50daa39c6c4a0574d509aa68b507b7_2106	4cb190364575d751463119e92857d019_5122	E_coli_7_02047	4840fb5d2d4897d217f65ba1ef1b22a7_5694
acrZ		multidrug efflux pump accessory protein AcrZ	6	6	1	4	79				149	149	149	81f6f292c45231c81cff920b572a826a_6100	d5a5a6aae91cabb186fe594057e8ea03_6446	ea50daa39c6c4a0574d509aa68b507b7_3066	4cb190364575d751463119e92857d019_6074	E_coli_7_03264	4840fb5d2d4897d217f65ba1ef1b22a7_6665
rpsF		30S ribosomal protein S6	6	6	1	4	1631				395	395	395	81f6f292c45231c81cff920b572a826a_8200	d5a5a6aae91cabb186fe594057e8ea03_8409	ea50daa39c6c4a0574d509aa68b507b7_4977	4cb190364575d751463119e92857d019_8278	E_coli_7_02174	4840fb5d2d4897d217f65ba1ef1b22a7_8648
galM		galactose-1-epimerase	6	6	1	4	73				1040	1040	1040	81f6f292c45231c81cff920b572a826a_6112	d5a5a6aae91cabb186fe594057e8ea03_6458	ea50daa39c6c4a0574d509aa68b507b7_3078	4cb190364575d751463119e92857d019_6086	E_coli_7_03258	4840fb5d2d4897d217f65ba1ef1b22a7_6677
yggS		pyridoxal phosphate homeostasis protein	6	6	1	4	411				704	704	704	81f6f292c45231c81cff920b572a826a_1557	d5a5a6aae91cabb186fe594057e8ea03_1648	ea50daa39c6c4a0574d509aa68b507b7_7812	4cb190364575d751463119e92857d019_1571	E_coli_7_02528	4840fb5d2d4897d217f65ba1ef1b22a7_2114
uxaC		glucuronate isomerase	6	6	1	4	5934				1412	1412	1412	81f6f292c45231c81cff920b572a826a_1248	d5a5a6aae91cabb186fe594057e8ea03_1245	ea50daa39c6c4a0574d509aa68b507b7_7405	4cb190364575d751463119e92857d019_1260	E_coli_7_03880	4840fb5d2d4897d217f65ba1ef1b22a7_1809
uvrC		excinuclease ABC subunit UvrC	6	6	1	4	2833				1832	1832	1832	81f6f292c45231c81cff920b572a826a_3867	d5a5a6aae91cabb186fe594057e8ea03_3925	ea50daa39c6c4a0574d509aa68b507b7_593	4cb190364575d751463119e92857d019_3704	E_coli_7_00473	4840fb5d2d4897d217f65ba1ef1b22a7_4306
cobB		NAD-dependent protein deacylase	6	6	1	4	4409				821	821	821	81f6f292c45231c81cff920b572a826a_5385	d5a5a6aae91cabb186fe594057e8ea03_5636	ea50daa39c6c4a0574d509aa68b507b7_2343	4cb190364575d751463119e92857d019_5362	E_coli_7_03781	4840fb5d2d4897d217f65ba1ef1b22a7_5930
csgB		curlin minor subunit CsgB	6	6	1	4	4332				455	455	455	81f6f292c45231c81cff920b572a826a_5539	d5a5a6aae91cabb186fe594057e8ea03_5790	ea50daa39c6c4a0574d509aa68b507b7_2497	4cb190364575d751463119e92857d019_5516	E_coli_7_03014	4840fb5d2d4897d217f65ba1ef1b22a7_6084
hinT		purine nucleoside phosphoramidase	6	6	1	4	4392				359	359	359	81f6f292c45231c81cff920b572a826a_5419	d5a5a6aae91cabb186fe594057e8ea03_5670	ea50daa39c6c4a0574d509aa68b507b7_2377	4cb190364575d751463119e92857d019_5396	E_coli_7_03798	4840fb5d2d4897d217f65ba1ef1b22a7_5964
hemA		glutamyl-tRNA reductase	6	6	1	4	4481				1256	1256	1256	81f6f292c45231c81cff920b572a826a_5245	d5a5a6aae91cabb186fe594057e8ea03_5378	ea50daa39c6c4a0574d509aa68b507b7_2197	4cb190364575d751463119e92857d019_5218	E_coli_7_02091	4840fb5d2d4897d217f65ba1ef1b22a7_5786
oppA		oligopeptide ABC transporter substrate-binding protein OppA	6	6	1	4	4514				1631	1676	1638	81f6f292c45231c81cff920b572a826a_5171	d5a5a6aae91cabb186fe594057e8ea03_5302	ea50daa39c6c4a0574d509aa68b507b7_2126	4cb190364575d751463119e92857d019_5142	E_coli_7_02056	4840fb5d2d4897d217f65ba1ef1b22a7_5714
chpS		type II toxin-antitoxin system antitoxin ChpS	6	6	1	4	646				251	251	251	81f6f292c45231c81cff920b572a826a_8150	d5a5a6aae91cabb186fe594057e8ea03_8351	ea50daa39c6c4a0574d509aa68b507b7_4927	4cb190364575d751463119e92857d019_8228	E_coli_7_02151	4840fb5d2d4897d217f65ba1ef1b22a7_8590
ychN		DsrE/F sulfur relay family protein YchN	6	6	1	4	4493				353	353	353	81f6f292c45231c81cff920b572a826a_5221	d5a5a6aae91cabb186fe594057e8ea03_5354	ea50daa39c6c4a0574d509aa68b507b7_2173	4cb190364575d751463119e92857d019_5194	E_coli_7_02079	4840fb5d2d4897d217f65ba1ef1b22a7_5762
ubiA		4-hydroxybenzoate octaprenyltransferase	6	6	1	4	794				872	872	872	81f6f292c45231c81cff920b572a826a_8522	d5a5a6aae91cabb186fe594057e8ea03_9014	ea50daa39c6c4a0574d509aa68b507b7_5420	4cb190364575d751463119e92857d019_8598	E_coli_7_02333	4840fb5d2d4897d217f65ba1ef1b22a7_8968
rsmH		16S rRNA (cytosine(1402)-N(4))-methyltransferase RsmH	6	6	1	4	500				941	941	941	81f6f292c45231c81cff920b572a826a_7544	d5a5a6aae91cabb186fe594057e8ea03_7866	ea50daa39c6c4a0574d509aa68b507b7_4442	4cb190364575d751463119e92857d019_7472	E_coli_7_01150	4840fb5d2d4897d217f65ba1ef1b22a7_8112
def		peptide deformylase	6	6	1	4	150				509	509	509	81f6f292c45231c81cff920b572a826a_852	d5a5a6aae91cabb186fe594057e8ea03_849	ea50daa39c6c4a0574d509aa68b507b7_7015	4cb190364575d751463119e92857d019_862	E_coli_7_01587	4840fb5d2d4897d217f65ba1ef1b22a7_1415
nuoH		NADH-quinone oxidoreductase subunit NuoH	6	6	1	4	4151				977	977	977	81f6f292c45231c81cff920b572a826a_2955	d5a5a6aae91cabb186fe594057e8ea03_3036	ea50daa39c6c4a0574d509aa68b507b7_9194	4cb190364575d751463119e92857d019_2944	E_coli_7_00119	4840fb5d2d4897d217f65ba1ef1b22a7_3528
dsrB		protein DsrB	6	6	1	4	2797				188	188	188	81f6f292c45231c81cff920b572a826a_3797	d5a5a6aae91cabb186fe594057e8ea03_3845	ea50daa39c6c4a0574d509aa68b507b7_511	4cb190364575d751463119e92857d019_3634	E_coli_7_00439	4840fb5d2d4897d217f65ba1ef1b22a7_4224
torC		pentaheme c-type cytochrome TorC	6	6	1	4	3537				1172	1172	1172	81f6f292c45231c81cff920b572a826a_5613	d5a5a6aae91cabb186fe594057e8ea03_5961	ea50daa39c6c4a0574d509aa68b507b7_2583	4cb190364575d751463119e92857d019_5587	E_coli_7_03049	4840fb5d2d4897d217f65ba1ef1b22a7_6178
nupC		nucleoside permease NupC	6	6	1	4	4032				1202	1202	1202	81f6f292c45231c81cff920b572a826a_2740	d5a5a6aae91cabb186fe594057e8ea03_2839	ea50daa39c6c4a0574d509aa68b507b7_8997	4cb190364575d751463119e92857d019_2747	E_coli_7_00014	4840fb5d2d4897d217f65ba1ef1b22a7_3331
pykF		pyruvate kinase PykF	6	6	1	4	3073				1412	1412	1412	81f6f292c45231c81cff920b572a826a_4352	d5a5a6aae91cabb186fe594057e8ea03_4400	ea50daa39c6c4a0574d509aa68b507b7_1114	4cb190364575d751463119e92857d019_4193	E_coli_7_00725	4840fb5d2d4897d217f65ba1ef1b22a7_4803
rssA		patatin-like phospholipase RssA	6	6	1	4	4504				905	944	911	81f6f292c45231c81cff920b572a826a_5187	d5a5a6aae91cabb186fe594057e8ea03_5320	ea50daa39c6c4a0574d509aa68b507b7_2142	4cb190364575d751463119e92857d019_5160	E_coli_7_02065	4840fb5d2d4897d217f65ba1ef1b22a7_5734
rspA		starvation-sensing protein RspA	6	6	1	4	3169				1214	1214	1214	81f6f292c45231c81cff920b572a826a_4554	d5a5a6aae91cabb186fe594057e8ea03_4604	ea50daa39c6c4a0574d509aa68b507b7_1312	4cb190364575d751463119e92857d019_4393	E_coli_7_00822	4840fb5d2d4897d217f65ba1ef1b22a7_5003
yijD		YijD family membrane protein	6	6	1	4	699				359	359	359	81f6f292c45231c81cff920b572a826a_8747	d5a5a6aae91cabb186fe594057e8ea03_9186	ea50daa39c6c4a0574d509aa68b507b7_5592	4cb190364575d751463119e92857d019_8821	E_coli_7_04088	4840fb5d2d4897d217f65ba1ef1b22a7_10
frdC		fumarate reductase subunit FrdC	6	6	1	4	1586				395	395	395	81f6f292c45231c81cff920b572a826a_8299	d5a5a6aae91cabb186fe594057e8ea03_8512	ea50daa39c6c4a0574d509aa68b507b7_5076	4cb190364575d751463119e92857d019_8375	E_coli_7_02221	4840fb5d2d4897d217f65ba1ef1b22a7_8745
zapA		cell division protein ZapA	6	6	1	4	6139				329	329	329	81f6f292c45231c81cff920b572a826a_1654	d5a5a6aae91cabb186fe594057e8ea03_1745	ea50daa39c6c4a0574d509aa68b507b7_7909	4cb190364575d751463119e92857d019_1666	E_coli_7_02484	4840fb5d2d4897d217f65ba1ef1b22a7_2207
yegW		GntR family transcriptional regulator	6	6	1	4	3741				746	746	746	81f6f292c45231c81cff920b572a826a_3309	d5a5a6aae91cabb186fe594057e8ea03_3380	ea50daa39c6c4a0574d509aa68b507b7_9532	4cb190364575d751463119e92857d019_3280	E_coli_7_00286	4840fb5d2d4897d217f65ba1ef1b22a7_3866
phoB		phosphate response regulator transcription factor PhoB	6	6	1	4	5516				689	689	689	81f6f292c45231c81cff920b572a826a_6796	d5a5a6aae91cabb186fe594057e8ea03_7163	ea50daa39c6c4a0574d509aa68b507b7_3770	4cb190364575d751463119e92857d019_6770	E_coli_7_01527	4840fb5d2d4897d217f65ba1ef1b22a7_7354
pspA		phage shock protein PspA	6	6	1	4	4585				668	668	668	81f6f292c45231c81cff920b572a826a_5026	d5a5a6aae91cabb186fe594057e8ea03_5163	ea50daa39c6c4a0574d509aa68b507b7_1872	4cb190364575d751463119e92857d019_4997	E_coli_7_01990	4840fb5d2d4897d217f65ba1ef1b22a7_5575
mgsA		methylglyoxal synthase	6	6	1	4	3503				458	458	458	81f6f292c45231c81cff920b572a826a_5684	d5a5a6aae91cabb186fe594057e8ea03_6032	ea50daa39c6c4a0574d509aa68b507b7_2654	4cb190364575d751463119e92857d019_5658	E_coli_7_03081	4840fb5d2d4897d217f65ba1ef1b22a7_6249
ygjV		YgjV family protein	6	6	1	4	5936				551	551	551	81f6f292c45231c81cff920b572a826a_1252	d5a5a6aae91cabb186fe594057e8ea03_1249	ea50daa39c6c4a0574d509aa68b507b7_7409	4cb190364575d751463119e92857d019_1264	E_coli_7_03882	4840fb5d2d4897d217f65ba1ef1b22a7_1813
glnB		nitrogen regulatory protein P-II	6	6	1	4	3862				338	338	338	81f6f292c45231c81cff920b572a826a_2417	d5a5a6aae91cabb186fe594057e8ea03_2518	ea50daa39c6c4a0574d509aa68b507b7_8650	4cb190364575d751463119e92857d019_2421	E_coli_7_03421	4840fb5d2d4897d217f65ba1ef1b22a7_2976
chaC		glutathione-specific gamma-glutamylcyclotransferase	6	6	1	4	4492				695	716	698	81f6f292c45231c81cff920b572a826a_5223	d5a5a6aae91cabb186fe594057e8ea03_5356	ea50daa39c6c4a0574d509aa68b507b7_2175	4cb190364575d751463119e92857d019_5196	E_coli_7_02080	4840fb5d2d4897d217f65ba1ef1b22a7_5764
ydiO		acyl-CoA dehydrogenase	6	6	1	4	3054				1151	1151	1151	81f6f292c45231c81cff920b572a826a_4311	d5a5a6aae91cabb186fe594057e8ea03_4359	ea50daa39c6c4a0574d509aa68b507b7_1073	4cb190364575d751463119e92857d019_4152	E_coli_7_00706	4840fb5d2d4897d217f65ba1ef1b22a7_4762
yidP		GntR family transcriptional regulator	6	6	1	4	5206				716	716	716	81f6f292c45231c81cff920b572a826a_40	d5a5a6aae91cabb186fe594057e8ea03_40	ea50daa39c6c4a0574d509aa68b507b7_6222	4cb190364575d751463119e92857d019_40	E_coli_7_02931	4840fb5d2d4897d217f65ba1ef1b22a7_614
speE		polyamine aminopropyltransferase	6	6	1	4	2590				866	866	866	81f6f292c45231c81cff920b572a826a_7468	d5a5a6aae91cabb186fe594057e8ea03_7790	ea50daa39c6c4a0574d509aa68b507b7_4364	4cb190364575d751463119e92857d019_7396	E_coli_7_01187	4840fb5d2d4897d217f65ba1ef1b22a7_8036
nagE		PTS N-acetyl glucosamine transporter subunit IIABC	6	6	1	4	5346				1946	1946	1946	81f6f292c45231c81cff920b572a826a_6302	d5a5a6aae91cabb186fe594057e8ea03_6622	ea50daa39c6c4a0574d509aa68b507b7_3242	4cb190364575d751463119e92857d019_6276	E_coli_7_01287	4840fb5d2d4897d217f65ba1ef1b22a7_6836
yibF		glutathione S-transferase	6	6	1	4	5299				608	608	608	81f6f292c45231c81cff920b572a826a_225	d5a5a6aae91cabb186fe594057e8ea03_237	ea50daa39c6c4a0574d509aa68b507b7_6417	4cb190364575d751463119e92857d019_223	E_coli_7_02841	4840fb5d2d4897d217f65ba1ef1b22a7_811
ytjA		DUF1328 domain-containing protein	6	6	1	4	1460				161	161	161	81f6f292c45231c81cff920b572a826a_7762	d5a5a6aae91cabb186fe594057e8ea03_8088	ea50daa39c6c4a0574d509aa68b507b7_4676	4cb190364575d751463119e92857d019_7690	E_coli_7_01047	4840fb5d2d4897d217f65ba1ef1b22a7_8334
lsrD		autoinducer 2 ABC transporter permease LsrD	6	6	1	4	3231				992	992	992	81f6f292c45231c81cff920b572a826a_4630	d5a5a6aae91cabb186fe594057e8ea03_4783	ea50daa39c6c4a0574d509aa68b507b7_1502	4cb190364575d751463119e92857d019_4593	E_coli_7_00859	4840fb5d2d4897d217f65ba1ef1b22a7_5197
glnK		P-II family nitrogen regulator	6	6	1	4	5569				338	338	338	81f6f292c45231c81cff920b572a826a_6694	d5a5a6aae91cabb186fe594057e8ea03_7055	ea50daa39c6c4a0574d509aa68b507b7_3662	4cb190364575d751463119e92857d019_6668	E_coli_7_01476	4840fb5d2d4897d217f65ba1ef1b22a7_7246
sulA		cell division inhibitor SulA	6	6	1	4	3498				509	509	509	81f6f292c45231c81cff920b572a826a_5694	d5a5a6aae91cabb186fe594057e8ea03_6042	ea50daa39c6c4a0574d509aa68b507b7_2664	4cb190364575d751463119e92857d019_5668	E_coli_7_03086	4840fb5d2d4897d217f65ba1ef1b22a7_6259
cdaR		DNA-binding transcriptional regulator CdaR	6	6	1	4	2563				1157	1157	1157	81f6f292c45231c81cff920b572a826a_7382	d5a5a6aae91cabb186fe594057e8ea03_7699	ea50daa39c6c4a0574d509aa68b507b7_4280	4cb190364575d751463119e92857d019_7310	E_coli_7_01228	4840fb5d2d4897d217f65ba1ef1b22a7_7950
WP_000170965.1		type I toxin-antitoxin system toxin Ldr family protein	6	6	1	4	4489				107	107	107	81f6f292c45231c81cff920b572a826a_5229	d5a5a6aae91cabb186fe594057e8ea03_5362	ea50daa39c6c4a0574d509aa68b507b7_2181	4cb190364575d751463119e92857d019_5202	E_coli_7_02083	4840fb5d2d4897d217f65ba1ef1b22a7_5770
arcA		two-component system response regulator ArcA	6	6	1	4	1435				716	716	716	81f6f292c45231c81cff920b572a826a_7712	d5a5a6aae91cabb186fe594057e8ea03_8038	ea50daa39c6c4a0574d509aa68b507b7_4624	4cb190364575d751463119e92857d019_7640	E_coli_7_01072	4840fb5d2d4897d217f65ba1ef1b22a7_8284
grxC		glutaredoxin 3	6	6	1	4	5282				251	251	251	81f6f292c45231c81cff920b572a826a_191	d5a5a6aae91cabb186fe594057e8ea03_187	ea50daa39c6c4a0574d509aa68b507b7_6369	4cb190364575d751463119e92857d019_189	E_coli_7_02858	4840fb5d2d4897d217f65ba1ef1b22a7_765
rbsB		ribose ABC transporter substrate-binding protein RbsB	6	6	1	4	1224				890	890	890	81f6f292c45231c81cff920b572a826a_9200	d5a5a6aae91cabb186fe594057e8ea03_9635	ea50daa39c6c4a0574d509aa68b507b7_6075	4cb190364575d751463119e92857d019_9274	E_coli_7_03001	4840fb5d2d4897d217f65ba1ef1b22a7_469
lpdA		dihydrolipoyl dehydrogenase	6	6	1	4	467				1424	1424	1424	81f6f292c45231c81cff920b572a826a_7478	d5a5a6aae91cabb186fe594057e8ea03_7800	ea50daa39c6c4a0574d509aa68b507b7_4374	4cb190364575d751463119e92857d019_7406	E_coli_7_01182	4840fb5d2d4897d217f65ba1ef1b22a7_8046
sodA		superoxide dismutase [Mn]	6	6	1	4	6072				620	620	620	81f6f292c45231c81cff920b572a826a_8865	d5a5a6aae91cabb186fe594057e8ea03_9304	ea50daa39c6c4a0574d509aa68b507b7_5706	4cb190364575d751463119e92857d019_8943	E_coli_7_04031	4840fb5d2d4897d217f65ba1ef1b22a7_128
rpoA		DNA-directed RNA polymerase subunit alpha	6	6	1	4	141				989	989	989	81f6f292c45231c81cff920b572a826a_834	d5a5a6aae91cabb186fe594057e8ea03_831	ea50daa39c6c4a0574d509aa68b507b7_6997	4cb190364575d751463119e92857d019_844	E_coli_7_01596	4840fb5d2d4897d217f65ba1ef1b22a7_1397
bssR		biofilm formation regulator BssR	6	6	1	4	3376				383	383	383	81f6f292c45231c81cff920b572a826a_5941	d5a5a6aae91cabb186fe594057e8ea03_6289	ea50daa39c6c4a0574d509aa68b507b7_2911	4cb190364575d751463119e92857d019_5915	E_coli_7_03341	4840fb5d2d4897d217f65ba1ef1b22a7_6506
group_3847	fimA	type 1 fimbrial major subunit FimA	6	6	1	4	3239				563	563	563	81f6f292c45231c81cff920b572a826a_4648	d5a5a6aae91cabb186fe594057e8ea03_4801	ea50daa39c6c4a0574d509aa68b507b7_1520	4cb190364575d751463119e92857d019_4619	E_coli_7_00868	4840fb5d2d4897d217f65ba1ef1b22a7_5215
flgH		flagellar basal body L-ring protein FlgH	6	6	1	4	4369				698	698	698	81f6f292c45231c81cff920b572a826a_5465	d5a5a6aae91cabb186fe594057e8ea03_5716	ea50daa39c6c4a0574d509aa68b507b7_2423	4cb190364575d751463119e92857d019_5442	E_coli_7_03821	4840fb5d2d4897d217f65ba1ef1b22a7_6010
yhhT		AI-2E family transporter	6	6	1	4	5008				1049	1049	1049	81f6f292c45231c81cff920b572a826a_488	d5a5a6aae91cabb186fe594057e8ea03_495	ea50daa39c6c4a0574d509aa68b507b7_6673	4cb190364575d751463119e92857d019_486	E_coli_7_01780	4840fb5d2d4897d217f65ba1ef1b22a7_1071
prs		ribose-phosphate diphosphokinase	6	6	1	4	4478				947	1013	958	81f6f292c45231c81cff920b572a826a_5251	d5a5a6aae91cabb186fe594057e8ea03_5384	ea50daa39c6c4a0574d509aa68b507b7_2203	4cb190364575d751463119e92857d019_5224	E_coli_7_02094	4840fb5d2d4897d217f65ba1ef1b22a7_5792
yheV		YheV family putative metal-binding protein	6	6	1	4	4880				200	200	200	81f6f292c45231c81cff920b572a826a_724	d5a5a6aae91cabb186fe594057e8ea03_749	ea50daa39c6c4a0574d509aa68b507b7_6915	4cb190364575d751463119e92857d019_734	E_coli_7_01651	4840fb5d2d4897d217f65ba1ef1b22a7_1315
thyA		thymidylate synthase	6	6	1	4	6230				794	794	794	81f6f292c45231c81cff920b572a826a_1842	d5a5a6aae91cabb186fe594057e8ea03_1939	ea50daa39c6c4a0574d509aa68b507b7_8099	4cb190364575d751463119e92857d019_1854	E_coli_7_02388	4840fb5d2d4897d217f65ba1ef1b22a7_2395
kdsD		arabinose-5-phosphate isomerase KdsD	6	6	1	4	227				986	986	986	81f6f292c45231c81cff920b572a826a_1025	d5a5a6aae91cabb186fe594057e8ea03_1018	ea50daa39c6c4a0574d509aa68b507b7_7184	4cb190364575d751463119e92857d019_1035	E_coli_7_03618	4840fb5d2d4897d217f65ba1ef1b22a7_1584
sucA		2-oxoglutarate dehydrogenase E1 component	6	6	1	4	49				2801	2801	2801	81f6f292c45231c81cff920b572a826a_6184	d5a5a6aae91cabb186fe594057e8ea03_6530	ea50daa39c6c4a0574d509aa68b507b7_3150	4cb190364575d751463119e92857d019_6158	E_coli_7_03227	4840fb5d2d4897d217f65ba1ef1b22a7_6746
ftsL		cell division protein FtsL	6	6	1	4	501				365	365	365	81f6f292c45231c81cff920b572a826a_7542	d5a5a6aae91cabb186fe594057e8ea03_7864	ea50daa39c6c4a0574d509aa68b507b7_4440	4cb190364575d751463119e92857d019_7470	E_coli_7_01151	4840fb5d2d4897d217f65ba1ef1b22a7_8110
phoP		two-component system response regulator PhoP	6	6	1	4	4419				671	671	671	81f6f292c45231c81cff920b572a826a_5369	d5a5a6aae91cabb186fe594057e8ea03_5616	ea50daa39c6c4a0574d509aa68b507b7_2323	4cb190364575d751463119e92857d019_5342	E_coli_7_03705	4840fb5d2d4897d217f65ba1ef1b22a7_5910
hybG		hydrogenase maturation factor HybG	6	6	1	4	6032				248	248	248	81f6f292c45231c81cff920b572a826a_1440	d5a5a6aae91cabb186fe594057e8ea03_1533	ea50daa39c6c4a0574d509aa68b507b7_7597	4cb190364575d751463119e92857d019_1460	E_coli_7_03972	4840fb5d2d4897d217f65ba1ef1b22a7_2001
metF		methylenetetrahydrofolate reductase	6	6	1	4	5314				890	890	890	81f6f292c45231c81cff920b572a826a_8795	d5a5a6aae91cabb186fe594057e8ea03_9234	ea50daa39c6c4a0574d509aa68b507b7_5636	4cb190364575d751463119e92857d019_8869	E_coli_7_04064	4840fb5d2d4897d217f65ba1ef1b22a7_58
ftsE		cell division ATP-binding protein FtsE	6	6	1	4	4997				668	668	668	81f6f292c45231c81cff920b572a826a_510	d5a5a6aae91cabb186fe594057e8ea03_517	ea50daa39c6c4a0574d509aa68b507b7_6695	4cb190364575d751463119e92857d019_508	E_coli_7_01769	4840fb5d2d4897d217f65ba1ef1b22a7_1093
glaH		glutarate dioxygenase GlaH	6	6	1	4	3576				977	977	977	81f6f292c45231c81cff920b572a826a_2256	d5a5a6aae91cabb186fe594057e8ea03_2357	ea50daa39c6c4a0574d509aa68b507b7_8493	4cb190364575d751463119e92857d019_2257	E_coli_7_02620	4840fb5d2d4897d217f65ba1ef1b22a7_2795
WP_000615067.1		hypothetical protein	6	6	1	4	4467				440	440	440	81f6f292c45231c81cff920b572a826a_5273	d5a5a6aae91cabb186fe594057e8ea03_5406	ea50daa39c6c4a0574d509aa68b507b7_2225	4cb190364575d751463119e92857d019_5246	E_coli_7_02106	4840fb5d2d4897d217f65ba1ef1b22a7_5814
yadL		fimbrial-like protein YadL	6	6	1	4	2606				602	602	602	81f6f292c45231c81cff920b572a826a_7436	d5a5a6aae91cabb186fe594057e8ea03_7758	ea50daa39c6c4a0574d509aa68b507b7_4332	4cb190364575d751463119e92857d019_7364	E_coli_7_01203	4840fb5d2d4897d217f65ba1ef1b22a7_8004
yghW		DUF2623 domain-containing protein	6	6	1	4	6024				287	287	287	81f6f292c45231c81cff920b572a826a_1424	d5a5a6aae91cabb186fe594057e8ea03_1517	ea50daa39c6c4a0574d509aa68b507b7_7581	4cb190364575d751463119e92857d019_1444	E_coli_7_03964	4840fb5d2d4897d217f65ba1ef1b22a7_1985
proW		glycine betaine/L-proline ABC transporter permease ProW	6	6	1	4	1117				1064	1064	1064	81f6f292c45231c81cff920b572a826a_2218	d5a5a6aae91cabb186fe594057e8ea03_2319	ea50daa39c6c4a0574d509aa68b507b7_8455	4cb190364575d751463119e92857d019_2219	E_coli_7_02639	4840fb5d2d4897d217f65ba1ef1b22a7_2757
fliS		flagellar export chaperone FliS	6	6	1	4	5797				392	392	392	81f6f292c45231c81cff920b572a826a_7109	d5a5a6aae91cabb186fe594057e8ea03_7430	ea50daa39c6c4a0574d509aa68b507b7_4001	4cb190364575d751463119e92857d019_7041	E_coli_7_04160	4840fb5d2d4897d217f65ba1ef1b22a7_7677
aaeR		HTH-type transcriptional activator AaeR	6	6	1	4	186				929	929	929	81f6f292c45231c81cff920b572a826a_943	d5a5a6aae91cabb186fe594057e8ea03_938	ea50daa39c6c4a0574d509aa68b507b7_7104	4cb190364575d751463119e92857d019_953	E_coli_7_03658	4840fb5d2d4897d217f65ba1ef1b22a7_1504
nikB		nickel ABC transporter permease subunit NikB	6	6	1	4	5011				944	944	944	81f6f292c45231c81cff920b572a826a_482	d5a5a6aae91cabb186fe594057e8ea03_489	ea50daa39c6c4a0574d509aa68b507b7_6667	4cb190364575d751463119e92857d019_480	E_coli_7_01783	4840fb5d2d4897d217f65ba1ef1b22a7_1065
ygdI		YgdI/YgdR family lipoprotein	6	6	1	4	6272				227	227	227	81f6f292c45231c81cff920b572a826a_1943	d5a5a6aae91cabb186fe594057e8ea03_2036	ea50daa39c6c4a0574d509aa68b507b7_8148	4cb190364575d751463119e92857d019_1948	E_coli_7_02774	4840fb5d2d4897d217f65ba1ef1b22a7_2482
yajC		preprotein translocase subunit YajC	6	6	1	4	5524				332	332	332	81f6f292c45231c81cff920b572a826a_6780	d5a5a6aae91cabb186fe594057e8ea03_7147	ea50daa39c6c4a0574d509aa68b507b7_3754	4cb190364575d751463119e92857d019_6754	E_coli_7_01519	4840fb5d2d4897d217f65ba1ef1b22a7_7338
exuT		hexuronate transporter ExuT	6	6	1	4	5933				1298	1298	1298	81f6f292c45231c81cff920b572a826a_1246	d5a5a6aae91cabb186fe594057e8ea03_1243	ea50daa39c6c4a0574d509aa68b507b7_7403	4cb190364575d751463119e92857d019_1258	E_coli_7_03879	4840fb5d2d4897d217f65ba1ef1b22a7_1807
uspD		universal stress protein UspD	6	6	1	4	6047				428	428	428	81f6f292c45231c81cff920b572a826a_8837	d5a5a6aae91cabb186fe594057e8ea03_9276	ea50daa39c6c4a0574d509aa68b507b7_5678	4cb190364575d751463119e92857d019_8911	E_coli_7_04046	4840fb5d2d4897d217f65ba1ef1b22a7_100
ycgR		flagellar brake protein	6	6	1	4	4465				734	773	740	81f6f292c45231c81cff920b572a826a_5277	d5a5a6aae91cabb186fe594057e8ea03_5410	ea50daa39c6c4a0574d509aa68b507b7_2229	4cb190364575d751463119e92857d019_5250	E_coli_7_02108	4840fb5d2d4897d217f65ba1ef1b22a7_5818
crp		cAMP-activated global transcriptional regulator CRP	6	6	1	4	4888				632	632	632	81f6f292c45231c81cff920b572a826a_708	d5a5a6aae91cabb186fe594057e8ea03_733	ea50daa39c6c4a0574d509aa68b507b7_6899	4cb190364575d751463119e92857d019_718	E_coli_7_01659	4840fb5d2d4897d217f65ba1ef1b22a7_1299
rplW		50S ribosomal protein L23	6	6	1	4	118				302	302	302	81f6f292c45231c81cff920b572a826a_788	d5a5a6aae91cabb186fe594057e8ea03_785	ea50daa39c6c4a0574d509aa68b507b7_6951	4cb190364575d751463119e92857d019_798	E_coli_7_01619	4840fb5d2d4897d217f65ba1ef1b22a7_1351
ispC		1-deoxy-D-xylulose-5-phosphate reductoisomerase	6	6	1	4	2552				1196	1196	1196	81f6f292c45231c81cff920b572a826a_7364	d5a5a6aae91cabb186fe594057e8ea03_7681	ea50daa39c6c4a0574d509aa68b507b7_4262	4cb190364575d751463119e92857d019_7290	E_coli_7_01238	4840fb5d2d4897d217f65ba1ef1b22a7_7932
yfeY		RpoE-regulated lipoprotein	6	6	1	4	3999				575	575	575	81f6f292c45231c81cff920b572a826a_2653	d5a5a6aae91cabb186fe594057e8ea03_2752	ea50daa39c6c4a0574d509aa68b507b7_8918	4cb190364575d751463119e92857d019_2657	E_coli_7_03541	4840fb5d2d4897d217f65ba1ef1b22a7_3244
yfdX		YfdX family protein	6	6	1	4	4050				632	632	632	81f6f292c45231c81cff920b572a826a_2776	d5a5a6aae91cabb186fe594057e8ea03_2875	ea50daa39c6c4a0574d509aa68b507b7_9033	4cb190364575d751463119e92857d019_2783	E_coli_7_00031	4840fb5d2d4897d217f65ba1ef1b22a7_3367
ypdI		colanic acid biosynthesis lipoprotein YpdI	6	6	1	4	4049				275	275	275	81f6f292c45231c81cff920b572a826a_2774	d5a5a6aae91cabb186fe594057e8ea03_2873	ea50daa39c6c4a0574d509aa68b507b7_9031	4cb190364575d751463119e92857d019_2781	E_coli_7_00030	4840fb5d2d4897d217f65ba1ef1b22a7_3365
thrC		threonine synthase	6	6	1	4	1429				1286	1286	1286	81f6f292c45231c81cff920b572a826a_7699	d5a5a6aae91cabb186fe594057e8ea03_8025	ea50daa39c6c4a0574d509aa68b507b7_4611	4cb190364575d751463119e92857d019_7627	E_coli_7_01076	4840fb5d2d4897d217f65ba1ef1b22a7_8271
yhbY		ribosome assembly RNA-binding protein YhbY	6	6	1	4	244				293	293	293	81f6f292c45231c81cff920b572a826a_1059	d5a5a6aae91cabb186fe594057e8ea03_1052	ea50daa39c6c4a0574d509aa68b507b7_7218	4cb190364575d751463119e92857d019_1069	E_coli_7_03601	4840fb5d2d4897d217f65ba1ef1b22a7_1618
mipA		scaffolding protein MipA	6	6	1	4	2965				746	746	746	81f6f292c45231c81cff920b572a826a_4138	d5a5a6aae91cabb186fe594057e8ea03_4198	ea50daa39c6c4a0574d509aa68b507b7_896	4cb190364575d751463119e92857d019_3975	E_coli_7_00618	4840fb5d2d4897d217f65ba1ef1b22a7_4585
yeiG		S-formylglutathione hydrolase	6	6	1	4	4266				836	836	836	81f6f292c45231c81cff920b572a826a_3202	d5a5a6aae91cabb186fe594057e8ea03_3271	ea50daa39c6c4a0574d509aa68b507b7_9425	4cb190364575d751463119e92857d019_3175	E_coli_7_00233	4840fb5d2d4897d217f65ba1ef1b22a7_3761
ycgN		YcgN family cysteine cluster protein	6	6	1	4	4453				446	461	448	81f6f292c45231c81cff920b572a826a_5303	d5a5a6aae91cabb186fe594057e8ea03_5436	ea50daa39c6c4a0574d509aa68b507b7_2255	4cb190364575d751463119e92857d019_5276	E_coli_7_02122	4840fb5d2d4897d217f65ba1ef1b22a7_5844
serA		phosphoglycerate dehydrogenase	6	6	1	4	6135				1232	1232	1232	81f6f292c45231c81cff920b572a826a_1643	d5a5a6aae91cabb186fe594057e8ea03_1734	ea50daa39c6c4a0574d509aa68b507b7_7898	4cb190364575d751463119e92857d019_1655	E_coli_7_02486	4840fb5d2d4897d217f65ba1ef1b22a7_2196
yjbJ		CsbD family protein	6	6	1	4	799				209	209	209	81f6f292c45231c81cff920b572a826a_8512	d5a5a6aae91cabb186fe594057e8ea03_9004	ea50daa39c6c4a0574d509aa68b507b7_5410	4cb190364575d751463119e92857d019_8588	E_coli_7_02328	4840fb5d2d4897d217f65ba1ef1b22a7_8958
rpsA		30S ribosomal protein S1	6	6	1	4	3451				1673	1673	1673	81f6f292c45231c81cff920b572a826a_5788	d5a5a6aae91cabb186fe594057e8ea03_6136	ea50daa39c6c4a0574d509aa68b507b7_2758	4cb190364575d751463119e92857d019_5762	E_coli_7_03133	4840fb5d2d4897d217f65ba1ef1b22a7_6353
mnmA		tRNA 2-thiouridine(34) synthase MnmA	6	6	1	4	4422				1106	1106	1106	81f6f292c45231c81cff920b572a826a_5363	d5a5a6aae91cabb186fe594057e8ea03_5610	ea50daa39c6c4a0574d509aa68b507b7_2317	4cb190364575d751463119e92857d019_5336	E_coli_7_03702	4840fb5d2d4897d217f65ba1ef1b22a7_5904
yjbE		exopolysaccharide production protein YjbE	6	6	1	4	775				242	242	242	81f6f292c45231c81cff920b572a826a_8554	d5a5a6aae91cabb186fe594057e8ea03_9044	ea50daa39c6c4a0574d509aa68b507b7_5450	4cb190364575d751463119e92857d019_8628	E_coli_7_02350	4840fb5d2d4897d217f65ba1ef1b22a7_9000
yjgH		RidA family protein	6	6	1	4	622				395	395	395	81f6f292c45231c81cff920b572a826a_8104	d5a5a6aae91cabb186fe594057e8ea03_8303	ea50daa39c6c4a0574d509aa68b507b7_4879	4cb190364575d751463119e92857d019_8180	E_coli_7_04427	4840fb5d2d4897d217f65ba1ef1b22a7_8544
lapB		lipopolysaccharide assembly protein LapB	6	6	1	4	4557				1169	1169	1169	81f6f292c45231c81cff920b572a826a_5082	d5a5a6aae91cabb186fe594057e8ea03_5219	ea50daa39c6c4a0574d509aa68b507b7_1926	4cb190364575d751463119e92857d019_5053	E_coli_7_02015	4840fb5d2d4897d217f65ba1ef1b22a7_5631
yjaG		YjaG family protein	6	6	1	4	726				590	590	590	81f6f292c45231c81cff920b572a826a_8669	d5a5a6aae91cabb186fe594057e8ea03_9106	ea50daa39c6c4a0574d509aa68b507b7_5512	4cb190364575d751463119e92857d019_8743	E_coli_7_04491	4840fb5d2d4897d217f65ba1ef1b22a7_9063
flhA		flagellar biosynthesis protein FlhA	6	6	1	4	2862				2078	2078	2078	81f6f292c45231c81cff920b572a826a_3934	d5a5a6aae91cabb186fe594057e8ea03_3994	ea50daa39c6c4a0574d509aa68b507b7_660	4cb190364575d751463119e92857d019_3771	E_coli_7_00504	4840fb5d2d4897d217f65ba1ef1b22a7_4377
fliM		flagellar motor switch protein FliM	6	6	1	4	2804				1004	1004	1004	81f6f292c45231c81cff920b572a826a_3811	d5a5a6aae91cabb186fe594057e8ea03_3859	ea50daa39c6c4a0574d509aa68b507b7_525	4cb190364575d751463119e92857d019_3648	E_coli_7_00446	4840fb5d2d4897d217f65ba1ef1b22a7_4238
ymgG		glycine zipper domain-containing protein	6	6	1	4	4441				284	344	324	81f6f292c45231c81cff920b572a826a_5327	d5a5a6aae91cabb186fe594057e8ea03_5460	ea50daa39c6c4a0574d509aa68b507b7_2279	4cb190364575d751463119e92857d019_5300	E_coli_7_02131	4840fb5d2d4897d217f65ba1ef1b22a7_5868
nirC		nitrite transporter NirC	6	6	1	4	4898				806	806	806	81f6f292c45231c81cff920b572a826a_688	d5a5a6aae91cabb186fe594057e8ea03_713	ea50daa39c6c4a0574d509aa68b507b7_6879	4cb190364575d751463119e92857d019_698	E_coli_7_01669	4840fb5d2d4897d217f65ba1ef1b22a7_1279
metK		methionine adenosyltransferase	6	6	1	4	6100				1154	1154	1154	81f6f292c45231c81cff920b572a826a_1575	d5a5a6aae91cabb186fe594057e8ea03_1668	ea50daa39c6c4a0574d509aa68b507b7_7830	4cb190364575d751463119e92857d019_1589	E_coli_7_02519	4840fb5d2d4897d217f65ba1ef1b22a7_2132
yhgN		NAAT family transporter YhgN	6	6	1	4	4964				593	593	593	81f6f292c45231c81cff920b572a826a_556	d5a5a6aae91cabb186fe594057e8ea03_575	ea50daa39c6c4a0574d509aa68b507b7_6753	4cb190364575d751463119e92857d019_566	E_coli_7_01740	4840fb5d2d4897d217f65ba1ef1b22a7_1151
rplI		50S ribosomal protein L9	6	6	1	4	1634				449	449	449	81f6f292c45231c81cff920b572a826a_8194	d5a5a6aae91cabb186fe594057e8ea03_8403	ea50daa39c6c4a0574d509aa68b507b7_4971	4cb190364575d751463119e92857d019_8272	E_coli_7_02171	4840fb5d2d4897d217f65ba1ef1b22a7_8642
ybgC		tol-pal system-associated acyl-CoA thioesterase	6	6	1	4	60				404	404	404	81f6f292c45231c81cff920b572a826a_6162	d5a5a6aae91cabb186fe594057e8ea03_6508	ea50daa39c6c4a0574d509aa68b507b7_3128	4cb190364575d751463119e92857d019_6136	E_coli_7_03238	4840fb5d2d4897d217f65ba1ef1b22a7_6724
actS		amidase activator ActS	6	6	1	4	6187				755	755	755	81f6f292c45231c81cff920b572a826a_1749	d5a5a6aae91cabb186fe594057e8ea03_1840	ea50daa39c6c4a0574d509aa68b507b7_8004	4cb190364575d751463119e92857d019_1761	E_coli_7_02439	4840fb5d2d4897d217f65ba1ef1b22a7_2302
slyD		peptidylprolyl isomerase	6	6	1	4	4879				590	590	590	81f6f292c45231c81cff920b572a826a_726	d5a5a6aae91cabb186fe594057e8ea03_751	ea50daa39c6c4a0574d509aa68b507b7_6917	4cb190364575d751463119e92857d019_736	E_coli_7_01650	4840fb5d2d4897d217f65ba1ef1b22a7_1317
nuoK		NADH-quinone oxidoreductase subunit NuoK	6	6	1	4	4154				302	302	302	81f6f292c45231c81cff920b572a826a_2961	d5a5a6aae91cabb186fe594057e8ea03_3042	ea50daa39c6c4a0574d509aa68b507b7_9200	4cb190364575d751463119e92857d019_2950	E_coli_7_00122	4840fb5d2d4897d217f65ba1ef1b22a7_3534
xdhB		xanthine dehydrogenase FAD-binding subunit XdhB	6	6	1	4	6185				878	878	878	81f6f292c45231c81cff920b572a826a_1745	d5a5a6aae91cabb186fe594057e8ea03_1836	ea50daa39c6c4a0574d509aa68b507b7_8000	4cb190364575d751463119e92857d019_1757	E_coli_7_02441	4840fb5d2d4897d217f65ba1ef1b22a7_2298
atpE		F0F1 ATP synthase subunit C	6	6	1	4	5148				239	239	239	81f6f292c45231c81cff920b572a826a_9228	d5a5a6aae91cabb186fe594057e8ea03_9663	ea50daa39c6c4a0574d509aa68b507b7_6103	4cb190364575d751463119e92857d019_9302	E_coli_7_02987	4840fb5d2d4897d217f65ba1ef1b22a7_497
ycgZ		regulatory protein YcgZ	6	6	1	4	4432				236	236	236	81f6f292c45231c81cff920b572a826a_5343	d5a5a6aae91cabb186fe594057e8ea03_5478	ea50daa39c6c4a0574d509aa68b507b7_2297	4cb190364575d751463119e92857d019_5316	E_coli_7_03695	4840fb5d2d4897d217f65ba1ef1b22a7_5884
glsB		glutaminase B	6	6	1	4	3222				926	926	926	81f6f292c45231c81cff920b572a826a_4612	d5a5a6aae91cabb186fe594057e8ea03_4765	ea50daa39c6c4a0574d509aa68b507b7_1484	4cb190364575d751463119e92857d019_4575	E_coli_7_00850	4840fb5d2d4897d217f65ba1ef1b22a7_5179
rplB		50S ribosomal protein L2	6	6	1	4	119				821	821	821	81f6f292c45231c81cff920b572a826a_790	d5a5a6aae91cabb186fe594057e8ea03_787	ea50daa39c6c4a0574d509aa68b507b7_6953	4cb190364575d751463119e92857d019_800	E_coli_7_01618	4840fb5d2d4897d217f65ba1ef1b22a7_1353
rraA		ribonuclease E activity regulator RraA	6	6	1	4	6041				485	485	485	81f6f292c45231c81cff920b572a826a_8825	d5a5a6aae91cabb186fe594057e8ea03_9264	ea50daa39c6c4a0574d509aa68b507b7_5666	4cb190364575d751463119e92857d019_8899	E_coli_7_04052	4840fb5d2d4897d217f65ba1ef1b22a7_88
mukE		chromosome partition protein MukE	6	6	1	4	3463				704	704	704	81f6f292c45231c81cff920b572a826a_5764	d5a5a6aae91cabb186fe594057e8ea03_6112	ea50daa39c6c4a0574d509aa68b507b7_2734	4cb190364575d751463119e92857d019_5738	E_coli_7_03121	4840fb5d2d4897d217f65ba1ef1b22a7_6329
nadK		NAD(+) kinase	6	6	1	4	4302				878	878	878	81f6f292c45231c81cff920b572a826a_2284	d5a5a6aae91cabb186fe594057e8ea03_2385	ea50daa39c6c4a0574d509aa68b507b7_8521	4cb190364575d751463119e92857d019_2288	E_coli_7_02606	4840fb5d2d4897d217f65ba1ef1b22a7_2845
sdhD		succinate dehydrogenase membrane anchor subunit	6	6	1	4	46				347	347	347	81f6f292c45231c81cff920b572a826a_6190	d5a5a6aae91cabb186fe594057e8ea03_6536	ea50daa39c6c4a0574d509aa68b507b7_3156	4cb190364575d751463119e92857d019_6164	E_coli_7_03224	4840fb5d2d4897d217f65ba1ef1b22a7_6752
ycjP		carbohydrate ABC transporter permease	6	6	1	4	4593				842	842	842	81f6f292c45231c81cff920b572a826a_5010	d5a5a6aae91cabb186fe594057e8ea03_5143	ea50daa39c6c4a0574d509aa68b507b7_1856	4cb190364575d751463119e92857d019_4981	E_coli_7_01982	4840fb5d2d4897d217f65ba1ef1b22a7_5559
WP_000738579.1		amino acid ABC transporter substrate-binding protein	6	6	1	4	161				1025	1025	1025	81f6f292c45231c81cff920b572a826a_895	d5a5a6aae91cabb186fe594057e8ea03_892	ea50daa39c6c4a0574d509aa68b507b7_7058	4cb190364575d751463119e92857d019_905	E_coli_7_03682	4840fb5d2d4897d217f65ba1ef1b22a7_1458
lolB		lipoprotein insertase outer membrane protein LolB	6	6	1	4	4480				623	623	623	81f6f292c45231c81cff920b572a826a_5247	d5a5a6aae91cabb186fe594057e8ea03_5380	ea50daa39c6c4a0574d509aa68b507b7_2199	4cb190364575d751463119e92857d019_5220	E_coli_7_02092	4840fb5d2d4897d217f65ba1ef1b22a7_5788
frdB		fumarate reductase iron-sulfur protein	6	6	1	4	1587				734	734	734	81f6f292c45231c81cff920b572a826a_8297	d5a5a6aae91cabb186fe594057e8ea03_8510	ea50daa39c6c4a0574d509aa68b507b7_5074	4cb190364575d751463119e92857d019_8373	E_coli_7_02220	4840fb5d2d4897d217f65ba1ef1b22a7_8743
clpS		ATP-dependent Clp protease adapter ClpS	6	6	1	4	3422				320	320	320	81f6f292c45231c81cff920b572a826a_5849	d5a5a6aae91cabb186fe594057e8ea03_6197	ea50daa39c6c4a0574d509aa68b507b7_2819	4cb190364575d751463119e92857d019_5823	E_coli_7_03163	4840fb5d2d4897d217f65ba1ef1b22a7_6414
sfsB		DNA-binding transcriptional regulator SfsB	6	6	1	4	236				278	278	278	81f6f292c45231c81cff920b572a826a_1043	d5a5a6aae91cabb186fe594057e8ea03_1036	ea50daa39c6c4a0574d509aa68b507b7_7202	4cb190364575d751463119e92857d019_1053	E_coli_7_03609	4840fb5d2d4897d217f65ba1ef1b22a7_1602
rcsB		transcriptional regulator RcsB	6	6	1	4	4205				650	650	650	81f6f292c45231c81cff920b572a826a_3073	d5a5a6aae91cabb186fe594057e8ea03_3144	ea50daa39c6c4a0574d509aa68b507b7_9298	4cb190364575d751463119e92857d019_3050	E_coli_7_00170	4840fb5d2d4897d217f65ba1ef1b22a7_3636
yobH		hypothetical protein	6	6	1	4	2918				239	239	239	81f6f292c45231c81cff920b572a826a_4044	d5a5a6aae91cabb186fe594057e8ea03_4104	ea50daa39c6c4a0574d509aa68b507b7_798	4cb190364575d751463119e92857d019_3881	E_coli_7_00575	4840fb5d2d4897d217f65ba1ef1b22a7_4487
ynfH		dimethyl sulfoxide reductase anchor subunit	6	6	1	4	3160				854	854	854	81f6f292c45231c81cff920b572a826a_4536	d5a5a6aae91cabb186fe594057e8ea03_4586	ea50daa39c6c4a0574d509aa68b507b7_1294	4cb190364575d751463119e92857d019_4375	E_coli_7_00813	4840fb5d2d4897d217f65ba1ef1b22a7_4985
fieF		CDF family cation-efflux transporter FieF	6	6	1	4	6055				902	902	902	81f6f292c45231c81cff920b572a826a_8853	d5a5a6aae91cabb186fe594057e8ea03_9292	ea50daa39c6c4a0574d509aa68b507b7_5694	4cb190364575d751463119e92857d019_8929	E_coli_7_04037	4840fb5d2d4897d217f65ba1ef1b22a7_116
hxpB		hexitol phosphatase HxpB	6	6	1	4	3021				668	668	668	81f6f292c45231c81cff920b572a826a_4246	d5a5a6aae91cabb186fe594057e8ea03_4294	ea50daa39c6c4a0574d509aa68b507b7_1008	4cb190364575d751463119e92857d019_4087	E_coli_7_00673	4840fb5d2d4897d217f65ba1ef1b22a7_4697
ybjQ		heavy metal-binding domain-containing protein	6	6	1	4	3406				323	323	323	81f6f292c45231c81cff920b572a826a_5881	d5a5a6aae91cabb186fe594057e8ea03_6229	ea50daa39c6c4a0574d509aa68b507b7_2849	4cb190364575d751463119e92857d019_5855	E_coli_7_03178	4840fb5d2d4897d217f65ba1ef1b22a7_6446
dnaC		DNA replication protein DnaC	6	6	1	4	1418				737	737	737	81f6f292c45231c81cff920b572a826a_7793	d5a5a6aae91cabb186fe594057e8ea03_8125	ea50daa39c6c4a0574d509aa68b507b7_4713	4cb190364575d751463119e92857d019_7831	E_coli_7_01030	4840fb5d2d4897d217f65ba1ef1b22a7_8371
rlmB		23S rRNA (guanosine(2251)-2'-O)-methyltransferase RlmB	6	6	1	4	1610				731	731	731	81f6f292c45231c81cff920b572a826a_8242	d5a5a6aae91cabb186fe594057e8ea03_8451	ea50daa39c6c4a0574d509aa68b507b7_5019	4cb190364575d751463119e92857d019_8318	E_coli_7_02195	4840fb5d2d4897d217f65ba1ef1b22a7_8688
comR		TetR family copper-responsive transcriptional repressor ComR	6	6	1	4	4400				632	695	642	81f6f292c45231c81cff920b572a826a_5403	d5a5a6aae91cabb186fe594057e8ea03_5654	ea50daa39c6c4a0574d509aa68b507b7_2361	4cb190364575d751463119e92857d019_5380	E_coli_7_03790	4840fb5d2d4897d217f65ba1ef1b22a7_5948
ilvE		branched-chain-amino-acid transaminase	6	6	1	4	1206				929	929	929	81f6f292c45231c81cff920b572a826a_9158	d5a5a6aae91cabb186fe594057e8ea03_9593	ea50daa39c6c4a0574d509aa68b507b7_5997	4cb190364575d751463119e92857d019_9232	E_coli_7_04221	4840fb5d2d4897d217f65ba1ef1b22a7_427
WP_000256969.1		energy-coupling factor ABC transporter ATP-binding protein	6	6	1	4	6117				677	677	677	81f6f292c45231c81cff920b572a826a_1607	d5a5a6aae91cabb186fe594057e8ea03_1698	ea50daa39c6c4a0574d509aa68b507b7_7860	4cb190364575d751463119e92857d019_1619	E_coli_7_02504	4840fb5d2d4897d217f65ba1ef1b22a7_2160
yhfL		YhfL family protein	6	6	1	4	4900				167	167	167	81f6f292c45231c81cff920b572a826a_684	d5a5a6aae91cabb186fe594057e8ea03_709	ea50daa39c6c4a0574d509aa68b507b7_6875	4cb190364575d751463119e92857d019_694	E_coli_7_01671	4840fb5d2d4897d217f65ba1ef1b22a7_1275
sseA		3-mercaptopyruvate sulfurtransferase	6	6	1	4	3895				845	845	845	81f6f292c45231c81cff920b572a826a_2483	d5a5a6aae91cabb186fe594057e8ea03_2582	ea50daa39c6c4a0574d509aa68b507b7_8714	4cb190364575d751463119e92857d019_2487	E_coli_7_03453	4840fb5d2d4897d217f65ba1ef1b22a7_3042
hldE		bifunctional D-glycero-beta-D-manno-heptose-7-phosphate kinase/D-glycero-beta-D-manno-heptose 1-phosphate adenylyltransferase HldE	6	6	1	4	5973				1433	1433	1433	81f6f292c45231c81cff920b572a826a_1329	d5a5a6aae91cabb186fe594057e8ea03_1420	ea50daa39c6c4a0574d509aa68b507b7_7486	4cb190364575d751463119e92857d019_1341	E_coli_7_03919	4840fb5d2d4897d217f65ba1ef1b22a7_1890
moaC		cyclic pyranopterin monophosphate synthase MoaC	6	6	1	4	100				485	485	485	81f6f292c45231c81cff920b572a826a_6057	d5a5a6aae91cabb186fe594057e8ea03_6403	ea50daa39c6c4a0574d509aa68b507b7_3023	4cb190364575d751463119e92857d019_6031	E_coli_7_03285	4840fb5d2d4897d217f65ba1ef1b22a7_6622
yfdC		formate/nitrite transporter family protein	6	6	1	4	4078				932	932	932	81f6f292c45231c81cff920b572a826a_2827	d5a5a6aae91cabb186fe594057e8ea03_2908	ea50daa39c6c4a0574d509aa68b507b7_9066	4cb190364575d751463119e92857d019_2816	E_coli_7_00054	4840fb5d2d4897d217f65ba1ef1b22a7_3400
yfbV		DUF412 domain-containing protein	6	6	1	4	4137				455	455	455	81f6f292c45231c81cff920b572a826a_2929	d5a5a6aae91cabb186fe594057e8ea03_3010	ea50daa39c6c4a0574d509aa68b507b7_9168	4cb190364575d751463119e92857d019_2918	E_coli_7_00105	4840fb5d2d4897d217f65ba1ef1b22a7_3502
ghrB		glyoxylate/hydroxypyruvate reductase GhrB	6	6	1	4	5094				974	974	974	81f6f292c45231c81cff920b572a826a_314	d5a5a6aae91cabb186fe594057e8ea03_321	ea50daa39c6c4a0574d509aa68b507b7_6503	4cb190364575d751463119e92857d019_312	E_coli_7_01868	4840fb5d2d4897d217f65ba1ef1b22a7_897
atpC		F0F1 ATP synthase subunit epsilon	6	6	1	4	5154				419	419	419	81f6f292c45231c81cff920b572a826a_9240	d5a5a6aae91cabb186fe594057e8ea03_9675	ea50daa39c6c4a0574d509aa68b507b7_6115	4cb190364575d751463119e92857d019_9314	E_coli_7_02981	4840fb5d2d4897d217f65ba1ef1b22a7_509
thiK		thiamine kinase	6	6	1	4	4395				824	824	824	81f6f292c45231c81cff920b572a826a_5413	d5a5a6aae91cabb186fe594057e8ea03_5664	ea50daa39c6c4a0574d509aa68b507b7_2371	4cb190364575d751463119e92857d019_5390	E_coli_7_03795	4840fb5d2d4897d217f65ba1ef1b22a7_5958
group_3930	tal	transaldolase	6	6	1	4	3971				950	950	950	81f6f292c45231c81cff920b572a826a_2607	d5a5a6aae91cabb186fe594057e8ea03_2706	ea50daa39c6c4a0574d509aa68b507b7_8838	4cb190364575d751463119e92857d019_2611	E_coli_7_03518	4840fb5d2d4897d217f65ba1ef1b22a7_3198
mddA		L-methionine sulfoximine/L-methionine sulfone acetyltransferase	6	6	1	4	4697				518	518	518	81f6f292c45231c81cff920b572a826a_4802	d5a5a6aae91cabb186fe594057e8ea03_4933	ea50daa39c6c4a0574d509aa68b507b7_1650	4cb190364575d751463119e92857d019_4773	E_coli_7_01881	4840fb5d2d4897d217f65ba1ef1b22a7_5349
rplF		50S ribosomal protein L6	6	6	1	4	131				533	533	533	81f6f292c45231c81cff920b572a826a_814	d5a5a6aae91cabb186fe594057e8ea03_811	ea50daa39c6c4a0574d509aa68b507b7_6977	4cb190364575d751463119e92857d019_824	E_coli_7_01606	4840fb5d2d4897d217f65ba1ef1b22a7_1377
ybjC		DUF1418 family protein	6	6	1	4	3390				287	287	287	81f6f292c45231c81cff920b572a826a_5913	d5a5a6aae91cabb186fe594057e8ea03_6261	ea50daa39c6c4a0574d509aa68b507b7_2883	4cb190364575d751463119e92857d019_5887	E_coli_7_03194	4840fb5d2d4897d217f65ba1ef1b22a7_6478
cydH		cytochrome bd-I accessory subunit CydH	6	6	1	4	3090				89	89	89	81f6f292c45231c81cff920b572a826a_4394	d5a5a6aae91cabb186fe594057e8ea03_4442	ea50daa39c6c4a0574d509aa68b507b7_1154	4cb190364575d751463119e92857d019_4235	E_coli_7_00744	4840fb5d2d4897d217f65ba1ef1b22a7_4845
ychH		stress-induced protein YchH	6	6	1	4	4476				278	278	278	81f6f292c45231c81cff920b572a826a_5255	d5a5a6aae91cabb186fe594057e8ea03_5388	ea50daa39c6c4a0574d509aa68b507b7_2207	4cb190364575d751463119e92857d019_5228	E_coli_7_02096	4840fb5d2d4897d217f65ba1ef1b22a7_5796
ygdR		lipoprotein YgdR	6	6	1	4	6224				218	218	218	81f6f292c45231c81cff920b572a826a_1830	d5a5a6aae91cabb186fe594057e8ea03_1927	ea50daa39c6c4a0574d509aa68b507b7_8087	4cb190364575d751463119e92857d019_1842	E_coli_7_02395	4840fb5d2d4897d217f65ba1ef1b22a7_2383
galU		UTP--glucose-1-phosphate uridylyltransferase GalU	6	6	1	4	4506				908	908	908	81f6f292c45231c81cff920b572a826a_5183	d5a5a6aae91cabb186fe594057e8ea03_5316	ea50daa39c6c4a0574d509aa68b507b7_2138	4cb190364575d751463119e92857d019_5156	E_coli_7_02063	4840fb5d2d4897d217f65ba1ef1b22a7_5730
yqaE		YqaE/Pmp3 family membrane protein	6	6	1	4	1105				158	158	158	81f6f292c45231c81cff920b572a826a_2242	d5a5a6aae91cabb186fe594057e8ea03_2343	ea50daa39c6c4a0574d509aa68b507b7_8479	4cb190364575d751463119e92857d019_2243	E_coli_7_02627	4840fb5d2d4897d217f65ba1ef1b22a7_2781
eno		phosphopyruvate hydratase	6	6	1	4	6302				1298	1298	1298	81f6f292c45231c81cff920b572a826a_2003	d5a5a6aae91cabb186fe594057e8ea03_2096	ea50daa39c6c4a0574d509aa68b507b7_8208	4cb190364575d751463119e92857d019_2008	E_coli_7_02744	4840fb5d2d4897d217f65ba1ef1b22a7_2542
plsX		phosphate acyltransferase PlsX	6	6	1	4	4379				1040	1070	1065	81f6f292c45231c81cff920b572a826a_5445	d5a5a6aae91cabb186fe594057e8ea03_5696	ea50daa39c6c4a0574d509aa68b507b7_2403	4cb190364575d751463119e92857d019_5422	E_coli_7_03811	4840fb5d2d4897d217f65ba1ef1b22a7_5990
mrdA		peptidoglycan DD-transpeptidase MrdA	6	6	1	4	5379				1901	1901	1901	81f6f292c45231c81cff920b572a826a_6389	d5a5a6aae91cabb186fe594057e8ea03_6709	ea50daa39c6c4a0574d509aa68b507b7_3329	4cb190364575d751463119e92857d019_6363	E_coli_7_01327	4840fb5d2d4897d217f65ba1ef1b22a7_6923
ygbM		HPr family phosphocarrier protein	6	6	1	4	1045				776	776	776	81f6f292c45231c81cff920b572a826a_2087	d5a5a6aae91cabb186fe594057e8ea03_2188	ea50daa39c6c4a0574d509aa68b507b7_8300	4cb190364575d751463119e92857d019_2092	E_coli_7_02703	4840fb5d2d4897d217f65ba1ef1b22a7_2626
dadX		catabolic alanine racemase DadX	6	6	1	4	4461				1070	1070	1070	81f6f292c45231c81cff920b572a826a_5285	d5a5a6aae91cabb186fe594057e8ea03_5418	ea50daa39c6c4a0574d509aa68b507b7_2237	4cb190364575d751463119e92857d019_5258	E_coli_7_02112	4840fb5d2d4897d217f65ba1ef1b22a7_5826
glcG		heme-binding protein	6	6	1	4	361				404	404	404	81f6f292c45231c81cff920b572a826a_1482	d5a5a6aae91cabb186fe594057e8ea03_1579	ea50daa39c6c4a0574d509aa68b507b7_7639	4cb190364575d751463119e92857d019_1502	E_coli_7_02564	4840fb5d2d4897d217f65ba1ef1b22a7_2045
btsS		two-component regulatory system sensor histidine kinase BtsS	6	6	1	4	3765				1685	1685	1685	81f6f292c45231c81cff920b572a826a_3258	d5a5a6aae91cabb186fe594057e8ea03_3331	ea50daa39c6c4a0574d509aa68b507b7_9483	4cb190364575d751463119e92857d019_3231	E_coli_7_00261	4840fb5d2d4897d217f65ba1ef1b22a7_3817
bcp		thioredoxin-dependent thiol peroxidase	6	6	1	4	3950				470	470	470	81f6f292c45231c81cff920b572a826a_2567	d5a5a6aae91cabb186fe594057e8ea03_2666	ea50daa39c6c4a0574d509aa68b507b7_8798	4cb190364575d751463119e92857d019_2571	E_coli_7_03498	4840fb5d2d4897d217f65ba1ef1b22a7_3158
pmbA		metalloprotease PmbA	6	6	1	4	636				1352	1352	1352	81f6f292c45231c81cff920b572a826a_8130	d5a5a6aae91cabb186fe594057e8ea03_8331	ea50daa39c6c4a0574d509aa68b507b7_4907	4cb190364575d751463119e92857d019_8208	E_coli_7_02141	4840fb5d2d4897d217f65ba1ef1b22a7_8570
tgt		tRNA guanosine(34) transglycosylase Tgt	6	6	1	4	5523				1127	1127	1127	81f6f292c45231c81cff920b572a826a_6782	d5a5a6aae91cabb186fe594057e8ea03_7149	ea50daa39c6c4a0574d509aa68b507b7_3756	4cb190364575d751463119e92857d019_6756	E_coli_7_01520	4840fb5d2d4897d217f65ba1ef1b22a7_7340
mppA		murein tripeptide ABC transporter substrate-binding protein MppA	6	6	1	4	4612				1613	1613	1613	81f6f292c45231c81cff920b572a826a_4974	d5a5a6aae91cabb186fe594057e8ea03_5105	ea50daa39c6c4a0574d509aa68b507b7_1818	4cb190364575d751463119e92857d019_4945	E_coli_7_01964	4840fb5d2d4897d217f65ba1ef1b22a7_5521
yffB		ArsC family reductase	6	6	1	4	3963				356	356	356	81f6f292c45231c81cff920b572a826a_2591	d5a5a6aae91cabb186fe594057e8ea03_2690	ea50daa39c6c4a0574d509aa68b507b7_8822	4cb190364575d751463119e92857d019_2595	E_coli_7_03511	4840fb5d2d4897d217f65ba1ef1b22a7_3182
yceF		7-methyl-GTP pyrophosphatase	6	6	1	4	4376				584	623	590	81f6f292c45231c81cff920b572a826a_5451	d5a5a6aae91cabb186fe594057e8ea03_5702	ea50daa39c6c4a0574d509aa68b507b7_2409	4cb190364575d751463119e92857d019_5428	E_coli_7_03814	4840fb5d2d4897d217f65ba1ef1b22a7_5996
marR		multiple antibiotic resistance transcriptional regulator MarR	6	6	1	4	3216				434	434	434	81f6f292c45231c81cff920b572a826a_4600	d5a5a6aae91cabb186fe594057e8ea03_4753	ea50daa39c6c4a0574d509aa68b507b7_1472	4cb190364575d751463119e92857d019_4563	E_coli_7_00844	4840fb5d2d4897d217f65ba1ef1b22a7_5167
WP_001295597.1		nucleoside recognition pore and gate family inner membrane transporter	6	6	1	4	1375				683	683	683	81f6f292c45231c81cff920b572a826a_7876	d5a5a6aae91cabb186fe594057e8ea03_8191	ea50daa39c6c4a0574d509aa68b507b7_4779	4cb190364575d751463119e92857d019_7911	E_coli_7_00991	4840fb5d2d4897d217f65ba1ef1b22a7_8437
rfaH		transcription/translation regulatory transformer protein RfaH	6	6	1	4	1133				488	488	488	81f6f292c45231c81cff920b572a826a_9012	d5a5a6aae91cabb186fe594057e8ea03_9445	ea50daa39c6c4a0574d509aa68b507b7_5851	4cb190364575d751463119e92857d019_9086	E_coli_7_04290	4840fb5d2d4897d217f65ba1ef1b22a7_273
ypeA		GNAT family acetyltransferase	6	6	1	4	3997				425	425	425	81f6f292c45231c81cff920b572a826a_2649	d5a5a6aae91cabb186fe594057e8ea03_2748	ea50daa39c6c4a0574d509aa68b507b7_8914	4cb190364575d751463119e92857d019_2653	E_coli_7_03539	4840fb5d2d4897d217f65ba1ef1b22a7_3240
ghoT		type V toxin-antitoxin system toxin GhoT	6	6	1	4	1560				173	173	173	81f6f292c45231c81cff920b572a826a_8352	d5a5a6aae91cabb186fe594057e8ea03_8724	ea50daa39c6c4a0574d509aa68b507b7_5129	4cb190364575d751463119e92857d019_8428	E_coli_7_02247	4840fb5d2d4897d217f65ba1ef1b22a7_8798
ruvC		crossover junction endodeoxyribonuclease RuvC	6	6	1	4	2879				521	521	521	81f6f292c45231c81cff920b572a826a_3968	d5a5a6aae91cabb186fe594057e8ea03_4028	ea50daa39c6c4a0574d509aa68b507b7_692	4cb190364575d751463119e92857d019_3805	E_coli_7_00520	4840fb5d2d4897d217f65ba1ef1b22a7_4411
exbD		TonB system transport protein ExbD	6	6	1	4	6019				425	425	425	81f6f292c45231c81cff920b572a826a_1414	d5a5a6aae91cabb186fe594057e8ea03_1505	ea50daa39c6c4a0574d509aa68b507b7_7571	4cb190364575d751463119e92857d019_1434	E_coli_7_03959	4840fb5d2d4897d217f65ba1ef1b22a7_1975
cyoC		cytochrome o ubiquinol oxidase subunit III	6	6	1	4	5549				614	614	614	81f6f292c45231c81cff920b572a826a_6734	d5a5a6aae91cabb186fe594057e8ea03_7095	ea50daa39c6c4a0574d509aa68b507b7_3702	4cb190364575d751463119e92857d019_6708	E_coli_7_01496	4840fb5d2d4897d217f65ba1ef1b22a7_7286
tsaE		tRNA (adenosine(37)-N6)-threonylcarbamoyltransferase complex ATPase subunit type 1 TsaE	6	6	1	4	1598				461	461	461	81f6f292c45231c81cff920b572a826a_8266	d5a5a6aae91cabb186fe594057e8ea03_8475	ea50daa39c6c4a0574d509aa68b507b7_5043	4cb190364575d751463119e92857d019_8342	E_coli_7_02207	4840fb5d2d4897d217f65ba1ef1b22a7_8712
ytfQ		galactofuranose ABC transporter substrate-binding protein YtfQ	6	6	1	4	643				956	956	956	81f6f292c45231c81cff920b572a826a_8144	d5a5a6aae91cabb186fe594057e8ea03_8345	ea50daa39c6c4a0574d509aa68b507b7_4921	4cb190364575d751463119e92857d019_8222	E_coli_7_02148	4840fb5d2d4897d217f65ba1ef1b22a7_8584
group_396	flgE	flagellar hook protein FlgE	6	6	1	4	4366				1205	1208	1205	81f6f292c45231c81cff920b572a826a_5471	d5a5a6aae91cabb186fe594057e8ea03_5722	ea50daa39c6c4a0574d509aa68b507b7_2429	4cb190364575d751463119e92857d019_5448	E_coli_7_03824	4840fb5d2d4897d217f65ba1ef1b22a7_6016
pdeG		cyclic diguanylate phosphodiesterase	6	6	1	4	4436				1523	1523	1523	81f6f292c45231c81cff920b572a826a_5335	d5a5a6aae91cabb186fe594057e8ea03_5470	ea50daa39c6c4a0574d509aa68b507b7_2289	4cb190364575d751463119e92857d019_5308	E_coli_7_03692	4840fb5d2d4897d217f65ba1ef1b22a7_5876
metI		methionine ABC transporter permease MetI	6	6	1	4	5686				653	653	653	81f6f292c45231c81cff920b572a826a_7312	d5a5a6aae91cabb186fe594057e8ea03_7627	ea50daa39c6c4a0574d509aa68b507b7_4208	4cb190364575d751463119e92857d019_7238	E_coli_7_01265	4840fb5d2d4897d217f65ba1ef1b22a7_7878
potC		spermidine/putrescine ABC transporter permease PotC	6	6	1	4	4413				794	794	794	81f6f292c45231c81cff920b572a826a_5381	d5a5a6aae91cabb186fe594057e8ea03_5628	ea50daa39c6c4a0574d509aa68b507b7_2335	4cb190364575d751463119e92857d019_5354	E_coli_7_03777	4840fb5d2d4897d217f65ba1ef1b22a7_5922
cra		catabolite repressor/activator	6	6	1	4	498				1004	1004	1004	81f6f292c45231c81cff920b572a826a_7548	d5a5a6aae91cabb186fe594057e8ea03_7870	ea50daa39c6c4a0574d509aa68b507b7_4446	4cb190364575d751463119e92857d019_7476	E_coli_7_01148	4840fb5d2d4897d217f65ba1ef1b22a7_8116
nudC		NAD(+) diphosphatase	6	6	1	4	723				773	773	773	81f6f292c45231c81cff920b572a826a_8675	d5a5a6aae91cabb186fe594057e8ea03_9112	ea50daa39c6c4a0574d509aa68b507b7_5518	4cb190364575d751463119e92857d019_8749	E_coli_7_04488	4840fb5d2d4897d217f65ba1ef1b22a7_9069
lrp		leucine-responsive transcriptional regulator Lrp	6	6	1	4	3429				494	494	494	81f6f292c45231c81cff920b572a826a_5832	d5a5a6aae91cabb186fe594057e8ea03_6180	ea50daa39c6c4a0574d509aa68b507b7_2802	4cb190364575d751463119e92857d019_5806	E_coli_7_03155	4840fb5d2d4897d217f65ba1ef1b22a7_6397
psiE		phosphate-starvation-inducible protein PsiE	6	6	1	4	781				410	410	410	81f6f292c45231c81cff920b572a826a_8542	d5a5a6aae91cabb186fe594057e8ea03_9034	ea50daa39c6c4a0574d509aa68b507b7_5440	4cb190364575d751463119e92857d019_8618	E_coli_7_02346	4840fb5d2d4897d217f65ba1ef1b22a7_8988
rplC		50S ribosomal protein L3	6	6	1	4	4854				629	629	629	81f6f292c45231c81cff920b572a826a_784	d5a5a6aae91cabb186fe594057e8ea03_781	ea50daa39c6c4a0574d509aa68b507b7_6947	4cb190364575d751463119e92857d019_794	E_coli_7_01621	4840fb5d2d4897d217f65ba1ef1b22a7_1347
pstC		phosphate ABC transporter permease PstC	6	6	1	4	5161				959	959	959	81f6f292c45231c81cff920b572a826a_9256	d5a5a6aae91cabb186fe594057e8ea03_9691	ea50daa39c6c4a0574d509aa68b507b7_6131	4cb190364575d751463119e92857d019_9330	E_coli_7_02973	4840fb5d2d4897d217f65ba1ef1b22a7_525
yebO		YebO family protein	6	6	1	4	2920				287	287	287	81f6f292c45231c81cff920b572a826a_4048	d5a5a6aae91cabb186fe594057e8ea03_4108	ea50daa39c6c4a0574d509aa68b507b7_802	4cb190364575d751463119e92857d019_3885	E_coli_7_00576	4840fb5d2d4897d217f65ba1ef1b22a7_4491
group_397	flgA	flagellar basal body P-ring formation chaperone FlgA	6	6	1	4	4362				659	659	659	81f6f292c45231c81cff920b572a826a_5479	d5a5a6aae91cabb186fe594057e8ea03_5730	ea50daa39c6c4a0574d509aa68b507b7_2437	4cb190364575d751463119e92857d019_5456	E_coli_7_03828	4840fb5d2d4897d217f65ba1ef1b22a7_6024
mngR		mannosyl-D-glycerate transport/metabolism system transcriptional repressor MngR	6	6	1	4	53				722	722	722	81f6f292c45231c81cff920b572a826a_6176	d5a5a6aae91cabb186fe594057e8ea03_6522	ea50daa39c6c4a0574d509aa68b507b7_3142	4cb190364575d751463119e92857d019_6150	E_coli_7_03231	4840fb5d2d4897d217f65ba1ef1b22a7_6738
chaA		sodium-potassium/proton antiporter ChaA	6	6	1	4	4490				1100	1100	1100	81f6f292c45231c81cff920b572a826a_5227	d5a5a6aae91cabb186fe594057e8ea03_5360	ea50daa39c6c4a0574d509aa68b507b7_2179	4cb190364575d751463119e92857d019_5200	E_coli_7_02082	4840fb5d2d4897d217f65ba1ef1b22a7_5768
guaC		GMP reductase	6	6	1	4	478				1043	1043	1043	81f6f292c45231c81cff920b572a826a_7500	d5a5a6aae91cabb186fe594057e8ea03_7822	ea50daa39c6c4a0574d509aa68b507b7_4396	4cb190364575d751463119e92857d019_7428	E_coli_7_01171	4840fb5d2d4897d217f65ba1ef1b22a7_8068
yigB		5-amino-6-(5-phospho-D-ribitylamino)uracil phosphatase YigB	6	6	1	4	1167				716	716	716	81f6f292c45231c81cff920b572a826a_9068	d5a5a6aae91cabb186fe594057e8ea03_9505	ea50daa39c6c4a0574d509aa68b507b7_5909	4cb190364575d751463119e92857d019_9142	E_coli_7_04263	4840fb5d2d4897d217f65ba1ef1b22a7_333
lpxP		kdo(2)-lipid IV(A) palmitoleoyltransferase	6	6	1	4	4047				920	920	920	81f6f292c45231c81cff920b572a826a_2770	d5a5a6aae91cabb186fe594057e8ea03_2869	ea50daa39c6c4a0574d509aa68b507b7_9027	4cb190364575d751463119e92857d019_2777	E_coli_7_00028	4840fb5d2d4897d217f65ba1ef1b22a7_3361
djlA		co-chaperone DjlA	6	6	1	4	6088				815	815	815	81f6f292c45231c81cff920b572a826a_7601	d5a5a6aae91cabb186fe594057e8ea03_7921	ea50daa39c6c4a0574d509aa68b507b7_4605	4cb190364575d751463119e92857d019_7527	E_coli_7_01126	4840fb5d2d4897d217f65ba1ef1b22a7_8167
rlmJ		23S rRNA (adenine(2030)-N(6))-methyltransferase	6	6	1	4	5034				842	842	842	81f6f292c45231c81cff920b572a826a_438	d5a5a6aae91cabb186fe594057e8ea03_445	ea50daa39c6c4a0574d509aa68b507b7_6627	4cb190364575d751463119e92857d019_436	E_coli_7_01802	4840fb5d2d4897d217f65ba1ef1b22a7_1021
group_3977	narI	respiratory nitrate reductase subunit gamma	6	6	1	4	4501				677	677	677	81f6f292c45231c81cff920b572a826a_5205	d5a5a6aae91cabb186fe594057e8ea03_5338	ea50daa39c6c4a0574d509aa68b507b7_2157	4cb190364575d751463119e92857d019_5178	E_coli_7_02070	4840fb5d2d4897d217f65ba1ef1b22a7_5746
fucP		L-fucose:H+ symporter permease	6	6	1	4	6280				1316	1316	1316	81f6f292c45231c81cff920b572a826a_1959	d5a5a6aae91cabb186fe594057e8ea03_2052	ea50daa39c6c4a0574d509aa68b507b7_8164	4cb190364575d751463119e92857d019_1964	E_coli_7_02766	4840fb5d2d4897d217f65ba1ef1b22a7_2498
hdeA		acid-activated periplasmic chaperone HdeA	6	6	1	4	5047				332	332	332	81f6f292c45231c81cff920b572a826a_412	d5a5a6aae91cabb186fe594057e8ea03_419	ea50daa39c6c4a0574d509aa68b507b7_6601	4cb190364575d751463119e92857d019_410	E_coli_7_01815	4840fb5d2d4897d217f65ba1ef1b22a7_995
mdoG		glucans biosynthesis protein MdoG	6	6	1	4	4339				1502	1535	1529	81f6f292c45231c81cff920b572a826a_5525	d5a5a6aae91cabb186fe594057e8ea03_5776	ea50daa39c6c4a0574d509aa68b507b7_2483	4cb190364575d751463119e92857d019_5502	E_coli_7_03007	4840fb5d2d4897d217f65ba1ef1b22a7_6070
dcrB		phage sensitivity protein DcrB	6	6	1	4	5006				557	557	557	81f6f292c45231c81cff920b572a826a_492	d5a5a6aae91cabb186fe594057e8ea03_499	ea50daa39c6c4a0574d509aa68b507b7_6677	4cb190364575d751463119e92857d019_490	E_coli_7_01778	4840fb5d2d4897d217f65ba1ef1b22a7_1075
tsaC		L-threonylcarbamoyladenylate synthase type 1 TsaC	6	6	1	4	154				572	572	572	81f6f292c45231c81cff920b572a826a_860	d5a5a6aae91cabb186fe594057e8ea03_857	ea50daa39c6c4a0574d509aa68b507b7_7023	4cb190364575d751463119e92857d019_870	E_coli_7_01583	4840fb5d2d4897d217f65ba1ef1b22a7_1423
elfD		molecular chaperone	6	6	1	4	3479				701	701	701	81f6f292c45231c81cff920b572a826a_5732	d5a5a6aae91cabb186fe594057e8ea03_6080	ea50daa39c6c4a0574d509aa68b507b7_2702	4cb190364575d751463119e92857d019_5706	E_coli_7_03105	4840fb5d2d4897d217f65ba1ef1b22a7_6297
ycbZ		Lon protease family protein	6	6	1	4	3495				1760	1760	1760	81f6f292c45231c81cff920b572a826a_5700	d5a5a6aae91cabb186fe594057e8ea03_6048	ea50daa39c6c4a0574d509aa68b507b7_2670	4cb190364575d751463119e92857d019_5674	E_coli_7_03089	4840fb5d2d4897d217f65ba1ef1b22a7_6265
allB		allantoinase AllB	6	6	1	4	5625				1361	1361	1361	81f6f292c45231c81cff920b572a826a_6578	d5a5a6aae91cabb186fe594057e8ea03_6931	ea50daa39c6c4a0574d509aa68b507b7_3540	4cb190364575d751463119e92857d019_6552	E_coli_7_01421	4840fb5d2d4897d217f65ba1ef1b22a7_7122
yccF		YccF domain-containing protein	6	6	1	4	3501				446	446	446	81f6f292c45231c81cff920b572a826a_5688	d5a5a6aae91cabb186fe594057e8ea03_6036	ea50daa39c6c4a0574d509aa68b507b7_2658	4cb190364575d751463119e92857d019_5662	E_coli_7_03083	4840fb5d2d4897d217f65ba1ef1b22a7_6253
pspD		phage shock protein PspD	6	6	1	4	4588				221	221	221	81f6f292c45231c81cff920b572a826a_5020	d5a5a6aae91cabb186fe594057e8ea03_5157	ea50daa39c6c4a0574d509aa68b507b7_1866	4cb190364575d751463119e92857d019_4991	E_coli_7_01987	4840fb5d2d4897d217f65ba1ef1b22a7_5569
yfdV		transporter YfdV	6	6	1	4	4053				944	944	944	81f6f292c45231c81cff920b572a826a_2782	d5a5a6aae91cabb186fe594057e8ea03_2881	ea50daa39c6c4a0574d509aa68b507b7_9039	4cb190364575d751463119e92857d019_2789	E_coli_7_00034	4840fb5d2d4897d217f65ba1ef1b22a7_3373
rsmD		16S rRNA (guanine(966)-N(2))-methyltransferase	6	6	1	4	4999				596	596	596	81f6f292c45231c81cff920b572a826a_506	d5a5a6aae91cabb186fe594057e8ea03_513	ea50daa39c6c4a0574d509aa68b507b7_6691	4cb190364575d751463119e92857d019_504	E_coli_7_01771	4840fb5d2d4897d217f65ba1ef1b22a7_1089
mrcB		bifunctional glycosyl transferase/transpeptidase	6	6	1	4	2579				2534	2534	2534	81f6f292c45231c81cff920b572a826a_7412	d5a5a6aae91cabb186fe594057e8ea03_7729	ea50daa39c6c4a0574d509aa68b507b7_4308	4cb190364575d751463119e92857d019_7340	E_coli_7_01215	4840fb5d2d4897d217f65ba1ef1b22a7_7980
ymdA		type 1 fimbrial protein	6	6	1	4	4335				311	311	311	81f6f292c45231c81cff920b572a826a_5533	d5a5a6aae91cabb186fe594057e8ea03_5784	ea50daa39c6c4a0574d509aa68b507b7_2491	4cb190364575d751463119e92857d019_5510	E_coli_7_03011	4840fb5d2d4897d217f65ba1ef1b22a7_6078
narH		nitrate reductase subunit beta	6	6	1	4	4499				1538	1538	1538	81f6f292c45231c81cff920b572a826a_5209	d5a5a6aae91cabb186fe594057e8ea03_5342	ea50daa39c6c4a0574d509aa68b507b7_2161	4cb190364575d751463119e92857d019_5182	E_coli_7_02072	4840fb5d2d4897d217f65ba1ef1b22a7_5750
hisJ		histidine ABC transporter substrate-binding protein HisJ	6	6	1	4	4123				782	782	782	81f6f292c45231c81cff920b572a826a_2901	d5a5a6aae91cabb186fe594057e8ea03_2982	ea50daa39c6c4a0574d509aa68b507b7_9140	4cb190364575d751463119e92857d019_2890	E_coli_7_00091	4840fb5d2d4897d217f65ba1ef1b22a7_3474
rimP		ribosome maturation factor RimP	6	6	1	4	252				452	452	452	81f6f292c45231c81cff920b572a826a_1081	d5a5a6aae91cabb186fe594057e8ea03_1074	ea50daa39c6c4a0574d509aa68b507b7_7240	4cb190364575d751463119e92857d019_1091	E_coli_7_03591	4840fb5d2d4897d217f65ba1ef1b22a7_1640
WP_000469266.1		hypothetical protein	6	6	1	4	5988				170	170	170	81f6f292c45231c81cff920b572a826a_1354	d5a5a6aae91cabb186fe594057e8ea03_1445	ea50daa39c6c4a0574d509aa68b507b7_7511	4cb190364575d751463119e92857d019_1368	E_coli_7_03929	4840fb5d2d4897d217f65ba1ef1b22a7_1915
rpoS		RNA polymerase sigma factor RpoS	6	6	1	4	1039				992	992	992	81f6f292c45231c81cff920b572a826a_2083	d5a5a6aae91cabb186fe594057e8ea03_2176	ea50daa39c6c4a0574d509aa68b507b7_8288	4cb190364575d751463119e92857d019_2088	E_coli_7_02705	4840fb5d2d4897d217f65ba1ef1b22a7_2622
radA		DNA repair protein RadA	6	6	1	4	1447				1382	1382	1382	81f6f292c45231c81cff920b572a826a_7736	d5a5a6aae91cabb186fe594057e8ea03_8062	ea50daa39c6c4a0574d509aa68b507b7_4650	4cb190364575d751463119e92857d019_7664	E_coli_7_01060	4840fb5d2d4897d217f65ba1ef1b22a7_8308
npr		PTS phosphocarrier protein NPr	6	6	1	4	218				272	272	272	81f6f292c45231c81cff920b572a826a_1007	d5a5a6aae91cabb186fe594057e8ea03_1000	ea50daa39c6c4a0574d509aa68b507b7_7166	4cb190364575d751463119e92857d019_1017	E_coli_7_03627	4840fb5d2d4897d217f65ba1ef1b22a7_1566
rapZ		RNase adapter RapZ	6	6	1	4	219				854	854	854	81f6f292c45231c81cff920b572a826a_1009	d5a5a6aae91cabb186fe594057e8ea03_1002	ea50daa39c6c4a0574d509aa68b507b7_7168	4cb190364575d751463119e92857d019_1019	E_coli_7_03626	4840fb5d2d4897d217f65ba1ef1b22a7_1568
cpxP		cell-envelope stress modulator CpxP	6	6	1	4	6056				500	500	500	81f6f292c45231c81cff920b572a826a_8855	d5a5a6aae91cabb186fe594057e8ea03_9294	ea50daa39c6c4a0574d509aa68b507b7_5696	4cb190364575d751463119e92857d019_8931	E_coli_7_04036	4840fb5d2d4897d217f65ba1ef1b22a7_118
glnS		glutamine--tRNA ligase	6	6	1	4	5345				1664	1664	1664	81f6f292c45231c81cff920b572a826a_6300	d5a5a6aae91cabb186fe594057e8ea03_6620	ea50daa39c6c4a0574d509aa68b507b7_3240	4cb190364575d751463119e92857d019_6274	E_coli_7_01285	4840fb5d2d4897d217f65ba1ef1b22a7_6834
ycdZ		DUF1097 domain-containing protein	6	6	1	4	4327				491	521	496	81f6f292c45231c81cff920b572a826a_5549	d5a5a6aae91cabb186fe594057e8ea03_5800	ea50daa39c6c4a0574d509aa68b507b7_2507	4cb190364575d751463119e92857d019_5526	E_coli_7_03019	4840fb5d2d4897d217f65ba1ef1b22a7_6094
fldB		flavodoxin FldB	6	6	1	4	6155				521	521	521	81f6f292c45231c81cff920b572a826a_1686	d5a5a6aae91cabb186fe594057e8ea03_1777	ea50daa39c6c4a0574d509aa68b507b7_7941	4cb190364575d751463119e92857d019_1698	E_coli_7_02469	4840fb5d2d4897d217f65ba1ef1b22a7_2239
greA		transcription elongation factor GreA	6	6	1	4	243				476	476	476	81f6f292c45231c81cff920b572a826a_1057	d5a5a6aae91cabb186fe594057e8ea03_1050	ea50daa39c6c4a0574d509aa68b507b7_7216	4cb190364575d751463119e92857d019_1067	E_coli_7_03602	4840fb5d2d4897d217f65ba1ef1b22a7_1616
ytfH		helix-turn-helix transcriptional regulator	6	6	1	4	656				380	380	380	81f6f292c45231c81cff920b572a826a_8170	d5a5a6aae91cabb186fe594057e8ea03_8371	ea50daa39c6c4a0574d509aa68b507b7_4947	4cb190364575d751463119e92857d019_8248	E_coli_7_02161	4840fb5d2d4897d217f65ba1ef1b22a7_8610
purB		adenylosuccinate lyase	6	6	1	4	4420				1370	1370	1370	81f6f292c45231c81cff920b572a826a_5367	d5a5a6aae91cabb186fe594057e8ea03_5614	ea50daa39c6c4a0574d509aa68b507b7_2321	4cb190364575d751463119e92857d019_5340	E_coli_7_03704	4840fb5d2d4897d217f65ba1ef1b22a7_5908
rplJ		50S ribosomal protein L10	6	6	1	4	711				497	497	497	81f6f292c45231c81cff920b572a826a_8698	d5a5a6aae91cabb186fe594057e8ea03_9137	ea50daa39c6c4a0574d509aa68b507b7_5543	4cb190364575d751463119e92857d019_8772	E_coli_7_04476	4840fb5d2d4897d217f65ba1ef1b22a7_9094
mug		G/U mismatch-specific DNA glycosylase	6	6	1	4	5957				506	506	506	81f6f292c45231c81cff920b572a826a_1297	d5a5a6aae91cabb186fe594057e8ea03_1388	ea50daa39c6c4a0574d509aa68b507b7_7454	4cb190364575d751463119e92857d019_1309	E_coli_7_03903	4840fb5d2d4897d217f65ba1ef1b22a7_1858
WP_001288368.1		hypothetical protein	6	6	1	4	4562				173	173	173	81f6f292c45231c81cff920b572a826a_5072	d5a5a6aae91cabb186fe594057e8ea03_5209	ea50daa39c6c4a0574d509aa68b507b7_1916	4cb190364575d751463119e92857d019_5043	E_coli_7_02010	4840fb5d2d4897d217f65ba1ef1b22a7_5621
glpA		anaerobic glycerol-3-phosphate dehydrogenase subunit A	6	6	1	4	4185				1628	1628	1628	81f6f292c45231c81cff920b572a826a_3025	d5a5a6aae91cabb186fe594057e8ea03_3108	ea50daa39c6c4a0574d509aa68b507b7_9264	4cb190364575d751463119e92857d019_3014	E_coli_7_00153	4840fb5d2d4897d217f65ba1ef1b22a7_3598
minD		septum site-determining protein MinD	6	6	1	4	4447				812	812	812	81f6f292c45231c81cff920b572a826a_5315	d5a5a6aae91cabb186fe594057e8ea03_5448	ea50daa39c6c4a0574d509aa68b507b7_2267	4cb190364575d751463119e92857d019_5288	E_coli_7_02128	4840fb5d2d4897d217f65ba1ef1b22a7_5856
ppiA		peptidylprolyl isomerase A	6	6	1	4	4894				572	572	572	81f6f292c45231c81cff920b572a826a_696	d5a5a6aae91cabb186fe594057e8ea03_721	ea50daa39c6c4a0574d509aa68b507b7_6887	4cb190364575d751463119e92857d019_706	E_coli_7_01665	4840fb5d2d4897d217f65ba1ef1b22a7_1287
phoH		phosphate starvation-inducible protein PhoH	6	6	1	4	3563				788	1064	834	81f6f292c45231c81cff920b572a826a_5565	d5a5a6aae91cabb186fe594057e8ea03_5913	ea50daa39c6c4a0574d509aa68b507b7_2535	4cb190364575d751463119e92857d019_5539	E_coli_7_03025	4840fb5d2d4897d217f65ba1ef1b22a7_6128
prlF		type II toxin-antitoxin system antitoxin PrlF	6	6	1	4	296				335	335	335	81f6f292c45231c81cff920b572a826a_1169	d5a5a6aae91cabb186fe594057e8ea03_1162	ea50daa39c6c4a0574d509aa68b507b7_7328	4cb190364575d751463119e92857d019_1179	E_coli_7_03548	4840fb5d2d4897d217f65ba1ef1b22a7_1728
gstB		glutathione S-transferase GstB	6	6	1	4	3378				626	626	626	81f6f292c45231c81cff920b572a826a_5937	d5a5a6aae91cabb186fe594057e8ea03_6285	ea50daa39c6c4a0574d509aa68b507b7_2907	4cb190364575d751463119e92857d019_5911	E_coli_7_03343	4840fb5d2d4897d217f65ba1ef1b22a7_6502
sspB		ClpXP protease specificity-enhancing factor	6	6	1	4	201				497	497	497	81f6f292c45231c81cff920b572a826a_973	d5a5a6aae91cabb186fe594057e8ea03_968	ea50daa39c6c4a0574d509aa68b507b7_7134	4cb190364575d751463119e92857d019_983	E_coli_7_03643	4840fb5d2d4897d217f65ba1ef1b22a7_1534
rnd		ribonuclease D	6	6	1	4	2941				1115	1115	1115	81f6f292c45231c81cff920b572a826a_4090	d5a5a6aae91cabb186fe594057e8ea03_4150	ea50daa39c6c4a0574d509aa68b507b7_844	4cb190364575d751463119e92857d019_3927	E_coli_7_00597	4840fb5d2d4897d217f65ba1ef1b22a7_4533
ybhL		Bax inhibitor-1/YccA family protein	6	6	1	4	103				704	704	704	81f6f292c45231c81cff920b572a826a_6051	d5a5a6aae91cabb186fe594057e8ea03_6397	ea50daa39c6c4a0574d509aa68b507b7_3017	4cb190364575d751463119e92857d019_6025	E_coli_7_03288	4840fb5d2d4897d217f65ba1ef1b22a7_6616
pstA		phosphate ABC transporter permease PstA	6	6	1	4	5162				890	890	890	81f6f292c45231c81cff920b572a826a_9258	d5a5a6aae91cabb186fe594057e8ea03_9693	ea50daa39c6c4a0574d509aa68b507b7_6133	4cb190364575d751463119e92857d019_9332	E_coli_7_02972	4840fb5d2d4897d217f65ba1ef1b22a7_527
ycfP		alpha/beta hydrolase YcfP	6	6	1	4	4397				542	542	542	81f6f292c45231c81cff920b572a826a_5409	d5a5a6aae91cabb186fe594057e8ea03_5660	ea50daa39c6c4a0574d509aa68b507b7_2367	4cb190364575d751463119e92857d019_5386	E_coli_7_03793	4840fb5d2d4897d217f65ba1ef1b22a7_5954
cheY		chemotaxis response regulator CheY	6	6	1	4	2859				389	389	389	81f6f292c45231c81cff920b572a826a_3928	d5a5a6aae91cabb186fe594057e8ea03_3988	ea50daa39c6c4a0574d509aa68b507b7_654	4cb190364575d751463119e92857d019_3765	E_coli_7_00501	4840fb5d2d4897d217f65ba1ef1b22a7_4367
pyrH		UMP kinase	6	6	1	4	2554				725	725	725	81f6f292c45231c81cff920b572a826a_7368	d5a5a6aae91cabb186fe594057e8ea03_7685	ea50daa39c6c4a0574d509aa68b507b7_4266	4cb190364575d751463119e92857d019_7294	E_coli_7_01236	4840fb5d2d4897d217f65ba1ef1b22a7_7936
ygbJ		NAD(P)-dependent oxidoreductase	6	6	1	4	1048				908	908	908	81f6f292c45231c81cff920b572a826a_2093	d5a5a6aae91cabb186fe594057e8ea03_2194	ea50daa39c6c4a0574d509aa68b507b7_8306	4cb190364575d751463119e92857d019_2098	E_coli_7_02700	4840fb5d2d4897d217f65ba1ef1b22a7_2632
torD		molecular chaperone TorD	6	6	1	4	3539				599	599	599	81f6f292c45231c81cff920b572a826a_5609	d5a5a6aae91cabb186fe594057e8ea03_5957	ea50daa39c6c4a0574d509aa68b507b7_2579	4cb190364575d751463119e92857d019_5583	E_coli_7_03047	4840fb5d2d4897d217f65ba1ef1b22a7_6174
lpoB		penicillin-binding protein activator LpoB	6	6	1	4	4394				641	641	641	81f6f292c45231c81cff920b572a826a_5415	d5a5a6aae91cabb186fe594057e8ea03_5666	ea50daa39c6c4a0574d509aa68b507b7_2373	4cb190364575d751463119e92857d019_5392	E_coli_7_03796	4840fb5d2d4897d217f65ba1ef1b22a7_5960
guaB		IMP dehydrogenase	6	6	1	4	3908				1466	1466	1466	81f6f292c45231c81cff920b572a826a_2509	d5a5a6aae91cabb186fe594057e8ea03_2608	ea50daa39c6c4a0574d509aa68b507b7_8740	4cb190364575d751463119e92857d019_2513	E_coli_7_03466	4840fb5d2d4897d217f65ba1ef1b22a7_3068
hspQ		heat shock protein HspQ	6	6	1	4	3506				317	317	317	81f6f292c45231c81cff920b572a826a_5678	d5a5a6aae91cabb186fe594057e8ea03_6026	ea50daa39c6c4a0574d509aa68b507b7_2648	4cb190364575d751463119e92857d019_5652	E_coli_7_03078	4840fb5d2d4897d217f65ba1ef1b22a7_6243
alaA		alanine transaminase AlaA	6	6	1	4	4142				1217	1217	1217	81f6f292c45231c81cff920b572a826a_2939	d5a5a6aae91cabb186fe594057e8ea03_3020	ea50daa39c6c4a0574d509aa68b507b7_9178	4cb190364575d751463119e92857d019_2928	E_coli_7_00110	4840fb5d2d4897d217f65ba1ef1b22a7_3512
panB		3-methyl-2-oxobutanoate hydroxymethyltransferase	6	6	1	4	2603				794	794	794	81f6f292c45231c81cff920b572a826a_7442	d5a5a6aae91cabb186fe594057e8ea03_7764	ea50daa39c6c4a0574d509aa68b507b7_4338	4cb190364575d751463119e92857d019_7370	E_coli_7_01200	4840fb5d2d4897d217f65ba1ef1b22a7_8010
rplR		50S ribosomal protein L18	6	6	1	4	132				353	353	353	81f6f292c45231c81cff920b572a826a_816	d5a5a6aae91cabb186fe594057e8ea03_813	ea50daa39c6c4a0574d509aa68b507b7_6979	4cb190364575d751463119e92857d019_826	E_coli_7_01605	4840fb5d2d4897d217f65ba1ef1b22a7_1379
tsf		translation elongation factor Ts	6	6	1	4	2555				851	851	851	81f6f292c45231c81cff920b572a826a_7370	d5a5a6aae91cabb186fe594057e8ea03_7687	ea50daa39c6c4a0574d509aa68b507b7_4268	4cb190364575d751463119e92857d019_7296	E_coli_7_01235	4840fb5d2d4897d217f65ba1ef1b22a7_7938
mscS		small-conductance mechanosensitive channel MscS	6	6	1	4	6124				860	860	860	81f6f292c45231c81cff920b572a826a_1621	d5a5a6aae91cabb186fe594057e8ea03_1712	ea50daa39c6c4a0574d509aa68b507b7_7876	4cb190364575d751463119e92857d019_1633	E_coli_7_02497	4840fb5d2d4897d217f65ba1ef1b22a7_2174
narP		nitrate/nitrite response regulator protein NarP	6	6	1	4	4230				647	647	647	81f6f292c45231c81cff920b572a826a_3125	d5a5a6aae91cabb186fe594057e8ea03_3194	ea50daa39c6c4a0574d509aa68b507b7_9348	4cb190364575d751463119e92857d019_3098	E_coli_7_00195	4840fb5d2d4897d217f65ba1ef1b22a7_3684
elaB		stress response protein ElaB	6	6	1	4	4162				305	305	305	81f6f292c45231c81cff920b572a826a_2979	d5a5a6aae91cabb186fe594057e8ea03_3062	ea50daa39c6c4a0574d509aa68b507b7_9218	4cb190364575d751463119e92857d019_2968	E_coli_7_00130	4840fb5d2d4897d217f65ba1ef1b22a7_3552
torT		TMAO reductase system periplasmic protein TorT	6	6	1	4	3535				1028	1028	1028	81f6f292c45231c81cff920b572a826a_5617	d5a5a6aae91cabb186fe594057e8ea03_5965	ea50daa39c6c4a0574d509aa68b507b7_2587	4cb190364575d751463119e92857d019_5591	E_coli_7_03051	4840fb5d2d4897d217f65ba1ef1b22a7_6182
guaA		glutamine-hydrolyzing GMP synthase	6	6	1	4	3923				1577	1577	1577	81f6f292c45231c81cff920b572a826a_2511	d5a5a6aae91cabb186fe594057e8ea03_2610	ea50daa39c6c4a0574d509aa68b507b7_8742	4cb190364575d751463119e92857d019_2515	E_coli_7_03467	4840fb5d2d4897d217f65ba1ef1b22a7_3070
mreC		rod shape-determining protein MreC	6	6	1	4	180				1103	1103	1103	81f6f292c45231c81cff920b572a826a_931	d5a5a6aae91cabb186fe594057e8ea03_926	ea50daa39c6c4a0574d509aa68b507b7_7092	4cb190364575d751463119e92857d019_941	E_coli_7_03664	4840fb5d2d4897d217f65ba1ef1b22a7_1492
yfdY		YfdY family protein	6	6	1	4	4048				242	242	242	81f6f292c45231c81cff920b572a826a_2772	d5a5a6aae91cabb186fe594057e8ea03_2871	ea50daa39c6c4a0574d509aa68b507b7_9029	4cb190364575d751463119e92857d019_2779	E_coli_7_00029	4840fb5d2d4897d217f65ba1ef1b22a7_3363
lpp		murein lipoprotein Lpp	6	6	1	4	3072				236	236	236	81f6f292c45231c81cff920b572a826a_4350	d5a5a6aae91cabb186fe594057e8ea03_4398	ea50daa39c6c4a0574d509aa68b507b7_1112	4cb190364575d751463119e92857d019_4191	E_coli_7_00724	4840fb5d2d4897d217f65ba1ef1b22a7_4801
setA		sugar efflux transporter SetA	6	6	1	4	487				1178	1178	1178	81f6f292c45231c81cff920b572a826a_7570	d5a5a6aae91cabb186fe594057e8ea03_7892	ea50daa39c6c4a0574d509aa68b507b7_4468	4cb190364575d751463119e92857d019_7498	E_coli_7_01140	4840fb5d2d4897d217f65ba1ef1b22a7_8138
pdxJ		pyridoxine 5'-phosphate synthase	6	6	1	4	3850				731	731	731	81f6f292c45231c81cff920b572a826a_2393	d5a5a6aae91cabb186fe594057e8ea03_2494	ea50daa39c6c4a0574d509aa68b507b7_8626	4cb190364575d751463119e92857d019_2397	E_coli_7_03410	4840fb5d2d4897d217f65ba1ef1b22a7_2952
recO		DNA repair protein RecO	6	6	1	4	3849				728	728	728	81f6f292c45231c81cff920b572a826a_2391	d5a5a6aae91cabb186fe594057e8ea03_2492	ea50daa39c6c4a0574d509aa68b507b7_8624	4cb190364575d751463119e92857d019_2395	E_coli_7_03409	4840fb5d2d4897d217f65ba1ef1b22a7_2950
zur		zinc uptake transcriptional repressor Zur	6	6	1	4	800				515	515	515	81f6f292c45231c81cff920b572a826a_8510	d5a5a6aae91cabb186fe594057e8ea03_9002	ea50daa39c6c4a0574d509aa68b507b7_5408	4cb190364575d751463119e92857d019_8586	E_coli_7_02327	4840fb5d2d4897d217f65ba1ef1b22a7_8956
emrB		multidrug efflux MFS transporter permease subunit EmrB	6	6	1	4	1097				1538	1538	1538	81f6f292c45231c81cff920b572a826a_2204	d5a5a6aae91cabb186fe594057e8ea03_2305	ea50daa39c6c4a0574d509aa68b507b7_8413	4cb190364575d751463119e92857d019_2205	E_coli_7_02646	4840fb5d2d4897d217f65ba1ef1b22a7_2743
caiF		carnitine metabolism transcriptional regulator CaiF	6	6	1	4	438				395	395	395	81f6f292c45231c81cff920b572a826a_7643	d5a5a6aae91cabb186fe594057e8ea03_7963	ea50daa39c6c4a0574d509aa68b507b7_4557	4cb190364575d751463119e92857d019_7569	E_coli_7_01105	4840fb5d2d4897d217f65ba1ef1b22a7_8215
torS		TMAO reductase system sensor histidine kinase/response regulator TorS	6	6	1	4	3534				2699	2744	2736	81f6f292c45231c81cff920b572a826a_5619	d5a5a6aae91cabb186fe594057e8ea03_5967	ea50daa39c6c4a0574d509aa68b507b7_2589	4cb190364575d751463119e92857d019_5593	E_coli_7_03052	4840fb5d2d4897d217f65ba1ef1b22a7_6184
group_4040	lptG	LPS export ABC transporter permease LptG	6	6	1	4	2306				1082	1082	1082	81f6f292c45231c81cff920b572a826a_8076	d5a5a6aae91cabb186fe594057e8ea03_8273	ea50daa39c6c4a0574d509aa68b507b7_4851	4cb190364575d751463119e92857d019_8152	E_coli_7_04439	4840fb5d2d4897d217f65ba1ef1b22a7_8516
aroL		shikimate kinase AroL	6	6	1	4	5503				524	524	524	81f6f292c45231c81cff920b572a826a_6818	d5a5a6aae91cabb186fe594057e8ea03_7183	ea50daa39c6c4a0574d509aa68b507b7_3790	4cb190364575d751463119e92857d019_6790	E_coli_7_01537	4840fb5d2d4897d217f65ba1ef1b22a7_7374
dadA		D-amino acid dehydrogenase	6	6	1	4	4460				1298	1298	1298	81f6f292c45231c81cff920b572a826a_5287	d5a5a6aae91cabb186fe594057e8ea03_5420	ea50daa39c6c4a0574d509aa68b507b7_2239	4cb190364575d751463119e92857d019_5260	E_coli_7_02113	4840fb5d2d4897d217f65ba1ef1b22a7_5828
fucU		L-fucose mutarotase	6	6	1	4	6277				422	422	422	81f6f292c45231c81cff920b572a826a_1953	d5a5a6aae91cabb186fe594057e8ea03_2046	ea50daa39c6c4a0574d509aa68b507b7_8158	4cb190364575d751463119e92857d019_1958	E_coli_7_02769	4840fb5d2d4897d217f65ba1ef1b22a7_2492
uvrY		UvrY/SirA/GacA family response regulator transcription factor	6	6	1	4	2832				656	656	656	81f6f292c45231c81cff920b572a826a_3865	d5a5a6aae91cabb186fe594057e8ea03_3923	ea50daa39c6c4a0574d509aa68b507b7_591	4cb190364575d751463119e92857d019_3702	E_coli_7_00472	4840fb5d2d4897d217f65ba1ef1b22a7_4304
rng		ribonuclease G	6	6	1	4	183				1469	1469	1469	81f6f292c45231c81cff920b572a826a_937	d5a5a6aae91cabb186fe594057e8ea03_932	ea50daa39c6c4a0574d509aa68b507b7_7098	4cb190364575d751463119e92857d019_947	E_coli_7_03661	4840fb5d2d4897d217f65ba1ef1b22a7_1498
xseB		exodeoxyribonuclease VII small subunit	6	6	1	4	5539				242	242	242	81f6f292c45231c81cff920b572a826a_6750	d5a5a6aae91cabb186fe594057e8ea03_7117	ea50daa39c6c4a0574d509aa68b507b7_3724	4cb190364575d751463119e92857d019_6724	E_coli_7_01504	4840fb5d2d4897d217f65ba1ef1b22a7_7308
tcyL		cystine ABC transporter permease	6	6	1	4	2827				668	668	668	81f6f292c45231c81cff920b572a826a_3855	d5a5a6aae91cabb186fe594057e8ea03_3913	ea50daa39c6c4a0574d509aa68b507b7_581	4cb190364575d751463119e92857d019_3692	E_coli_7_00468	4840fb5d2d4897d217f65ba1ef1b22a7_4294
iclR		glyoxylate bypass operon transcriptional repressor IclR	6	6	1	4	740				824	824	824	81f6f292c45231c81cff920b572a826a_8629	d5a5a6aae91cabb186fe594057e8ea03_9066	ea50daa39c6c4a0574d509aa68b507b7_5472	4cb190364575d751463119e92857d019_8703	E_coli_7_02361	4840fb5d2d4897d217f65ba1ef1b22a7_9023
mdtI		multidrug/spermidine efflux SMR transporter subunit MdtI	6	6	1	4	3150				329	329	329	81f6f292c45231c81cff920b572a826a_4516	d5a5a6aae91cabb186fe594057e8ea03_4564	ea50daa39c6c4a0574d509aa68b507b7_1274	4cb190364575d751463119e92857d019_4355	E_coli_7_00804	4840fb5d2d4897d217f65ba1ef1b22a7_4965
xanP		xanthine/proton symporter XanP	6	6	1	4	5237				1391	1391	1391	81f6f292c45231c81cff920b572a826a_107	d5a5a6aae91cabb186fe594057e8ea03_105	ea50daa39c6c4a0574d509aa68b507b7_6287	4cb190364575d751463119e92857d019_107	E_coli_7_02899	4840fb5d2d4897d217f65ba1ef1b22a7_681
yjcO		sel1 repeat family protein	6	6	1	4	1515				689	689	689	81f6f292c45231c81cff920b572a826a_8444	d5a5a6aae91cabb186fe594057e8ea03_8816	ea50daa39c6c4a0574d509aa68b507b7_5221	4cb190364575d751463119e92857d019_8520	E_coli_7_02294	4840fb5d2d4897d217f65ba1ef1b22a7_8890
nfsB		oxygen-insensitive NAD(P)H nitroreductase	6	6	1	4	5437				653	653	653	81f6f292c45231c81cff920b572a826a_6503	d5a5a6aae91cabb186fe594057e8ea03_6828	ea50daa39c6c4a0574d509aa68b507b7_3445	4cb190364575d751463119e92857d019_6477	E_coli_7_01385	4840fb5d2d4897d217f65ba1ef1b22a7_7039
thrA		bifunctional aspartate kinase/homoserine dehydrogenase I	6	6	1	4	1431				2462	2462	2462	81f6f292c45231c81cff920b572a826a_7703	d5a5a6aae91cabb186fe594057e8ea03_8029	ea50daa39c6c4a0574d509aa68b507b7_4615	4cb190364575d751463119e92857d019_7631	E_coli_7_01074	4840fb5d2d4897d217f65ba1ef1b22a7_8275
clpX		ATP-dependent protease ATP-binding subunit ClpX	6	6	1	4	5557				1274	1274	1274	81f6f292c45231c81cff920b572a826a_6718	d5a5a6aae91cabb186fe594057e8ea03_7079	ea50daa39c6c4a0574d509aa68b507b7_3686	4cb190364575d751463119e92857d019_6692	E_coli_7_01488	4840fb5d2d4897d217f65ba1ef1b22a7_7270
brnQ		branched-chain amino acid transporter carrier protein BrnQ	6	6	1	4	5518				1319	1319	1319	81f6f292c45231c81cff920b572a826a_6792	d5a5a6aae91cabb186fe594057e8ea03_7159	ea50daa39c6c4a0574d509aa68b507b7_3766	4cb190364575d751463119e92857d019_6766	E_coli_7_01525	4840fb5d2d4897d217f65ba1ef1b22a7_7350
yciT		DNA-binding transcriptional regulator YciT	6	6	1	4	4561				749	749	749	81f6f292c45231c81cff920b572a826a_5074	d5a5a6aae91cabb186fe594057e8ea03_5211	ea50daa39c6c4a0574d509aa68b507b7_1918	4cb190364575d751463119e92857d019_5045	E_coli_7_02011	4840fb5d2d4897d217f65ba1ef1b22a7_5623
tsx		nucleoside-specific channel-forming protein Tsx	6	6	1	4	5528				884	884	884	81f6f292c45231c81cff920b572a826a_6772	d5a5a6aae91cabb186fe594057e8ea03_7139	ea50daa39c6c4a0574d509aa68b507b7_3746	4cb190364575d751463119e92857d019_6746	E_coli_7_01515	4840fb5d2d4897d217f65ba1ef1b22a7_7330
yjdJ		GNAT family N-acetyltransferase	6	6	1	4	1558				272	272	272	81f6f292c45231c81cff920b572a826a_8356	d5a5a6aae91cabb186fe594057e8ea03_8728	ea50daa39c6c4a0574d509aa68b507b7_5133	4cb190364575d751463119e92857d019_8432	E_coli_7_02249	4840fb5d2d4897d217f65ba1ef1b22a7_8802
rpsI		30S ribosomal protein S9	6	6	1	4	199				392	392	392	81f6f292c45231c81cff920b572a826a_969	d5a5a6aae91cabb186fe594057e8ea03_964	ea50daa39c6c4a0574d509aa68b507b7_7130	4cb190364575d751463119e92857d019_979	E_coli_7_03645	4840fb5d2d4897d217f65ba1ef1b22a7_1530
cbdX		cytochrome bd-II oxidase subunit CbdX	6	6	1	4	3519				92	92	92	81f6f292c45231c81cff920b572a826a_5649	d5a5a6aae91cabb186fe594057e8ea03_5997	ea50daa39c6c4a0574d509aa68b507b7_2619	4cb190364575d751463119e92857d019_5623	E_coli_7_03064	4840fb5d2d4897d217f65ba1ef1b22a7_6214
yoaE		CNNM family cation transport protein YoaE	6	6	1	4	2929				1556	1556	1556	81f6f292c45231c81cff920b572a826a_4066	d5a5a6aae91cabb186fe594057e8ea03_4126	ea50daa39c6c4a0574d509aa68b507b7_820	4cb190364575d751463119e92857d019_3903	E_coli_7_00585	4840fb5d2d4897d217f65ba1ef1b22a7_4509
ftnA		non-heme ferritin	6	6	1	4	2838				497	497	497	81f6f292c45231c81cff920b572a826a_3886	d5a5a6aae91cabb186fe594057e8ea03_3944	ea50daa39c6c4a0574d509aa68b507b7_612	4cb190364575d751463119e92857d019_3723	E_coli_7_00481	4840fb5d2d4897d217f65ba1ef1b22a7_4325
hcaD		phenylpropionate dioxygenase ferredoxin reductase subunit	6	6	1	4	3873				1202	1202	1202	81f6f292c45231c81cff920b572a826a_2439	d5a5a6aae91cabb186fe594057e8ea03_2540	ea50daa39c6c4a0574d509aa68b507b7_8672	4cb190364575d751463119e92857d019_2443	E_coli_7_03432	4840fb5d2d4897d217f65ba1ef1b22a7_2998
grxD		monothiol glutaredoxin 4	6	6	1	4	3094				347	347	347	81f6f292c45231c81cff920b572a826a_4402	d5a5a6aae91cabb186fe594057e8ea03_4450	ea50daa39c6c4a0574d509aa68b507b7_1162	4cb190364575d751463119e92857d019_4243	E_coli_7_00748	4840fb5d2d4897d217f65ba1ef1b22a7_4853
slp		outer membrane lipoprotein Slp	6	6	1	4	5043				566	566	566	81f6f292c45231c81cff920b572a826a_420	d5a5a6aae91cabb186fe594057e8ea03_427	ea50daa39c6c4a0574d509aa68b507b7_6609	4cb190364575d751463119e92857d019_418	E_coli_7_01811	4840fb5d2d4897d217f65ba1ef1b22a7_1003
ecpB		fimbrial chaperone EcpB	6	6	1	4	5845				668	668	668	81f6f292c45231c81cff920b572a826a_7002	d5a5a6aae91cabb186fe594057e8ea03_7371	ea50daa39c6c4a0574d509aa68b507b7_3942	4cb190364575d751463119e92857d019_6978	E_coli_7_04130	4840fb5d2d4897d217f65ba1ef1b22a7_7560
rplV		50S ribosomal protein L22	6	6	1	4	121				332	332	332	81f6f292c45231c81cff920b572a826a_794	d5a5a6aae91cabb186fe594057e8ea03_791	ea50daa39c6c4a0574d509aa68b507b7_6957	4cb190364575d751463119e92857d019_804	E_coli_7_01616	4840fb5d2d4897d217f65ba1ef1b22a7_1357
pdxK		pyridoxine/pyridoxal/pyridoxamine kinase	6	6	1	4	4012				851	851	851	81f6f292c45231c81cff920b572a826a_2679	d5a5a6aae91cabb186fe594057e8ea03_2778	ea50daa39c6c4a0574d509aa68b507b7_8944	4cb190364575d751463119e92857d019_2683	E_coli_7_04546	4840fb5d2d4897d217f65ba1ef1b22a7_3270
yceB		lipoprotein	6	6	1	4	4353				560	560	560	81f6f292c45231c81cff920b572a826a_5497	d5a5a6aae91cabb186fe594057e8ea03_5748	ea50daa39c6c4a0574d509aa68b507b7_2455	4cb190364575d751463119e92857d019_5474	E_coli_7_03837	4840fb5d2d4897d217f65ba1ef1b22a7_6042
sufA		Fe-S cluster assembly scaffold SufA	6	6	1	4	3065				368	368	368	81f6f292c45231c81cff920b572a826a_4336	d5a5a6aae91cabb186fe594057e8ea03_4384	ea50daa39c6c4a0574d509aa68b507b7_1098	4cb190364575d751463119e92857d019_4177	E_coli_7_00717	4840fb5d2d4897d217f65ba1ef1b22a7_4787
ompA		porin OmpA	6	6	1	4	3497				1040	1052	1048	81f6f292c45231c81cff920b572a826a_5696	d5a5a6aae91cabb186fe594057e8ea03_6044	ea50daa39c6c4a0574d509aa68b507b7_2666	4cb190364575d751463119e92857d019_5670	E_coli_7_03087	4840fb5d2d4897d217f65ba1ef1b22a7_6261
tolB		Tol-Pal system beta propeller repeat protein TolB	6	6	1	4	64				1292	1292	1292	81f6f292c45231c81cff920b572a826a_6154	d5a5a6aae91cabb186fe594057e8ea03_6500	ea50daa39c6c4a0574d509aa68b507b7_3120	4cb190364575d751463119e92857d019_6128	E_coli_7_03242	4840fb5d2d4897d217f65ba1ef1b22a7_6716
ygiN		antibiotic biosynthesis monooxygenase	6	6	1	4	5999				314	314	314	81f6f292c45231c81cff920b572a826a_1376	d5a5a6aae91cabb186fe594057e8ea03_1467	ea50daa39c6c4a0574d509aa68b507b7_7533	4cb190364575d751463119e92857d019_1390	E_coli_7_03940	4840fb5d2d4897d217f65ba1ef1b22a7_1937
yheU		YheU family protein	6	6	1	4	4885				218	218	218	81f6f292c45231c81cff920b572a826a_714	d5a5a6aae91cabb186fe594057e8ea03_739	ea50daa39c6c4a0574d509aa68b507b7_6905	4cb190364575d751463119e92857d019_724	E_coli_7_01656	4840fb5d2d4897d217f65ba1ef1b22a7_1305
minE		cell division topological specificity factor MinE	6	6	1	4	4446				266	266	266	81f6f292c45231c81cff920b572a826a_5317	d5a5a6aae91cabb186fe594057e8ea03_5450	ea50daa39c6c4a0574d509aa68b507b7_2269	4cb190364575d751463119e92857d019_5290	E_coli_7_02129	4840fb5d2d4897d217f65ba1ef1b22a7_5858
smrA		DNA endonuclease SmrA	6	6	1	4	4622				563	563	563	81f6f292c45231c81cff920b572a826a_4954	d5a5a6aae91cabb186fe594057e8ea03_5085	ea50daa39c6c4a0574d509aa68b507b7_1798	4cb190364575d751463119e92857d019_4925	E_coli_7_01954	4840fb5d2d4897d217f65ba1ef1b22a7_5501
rplK		50S ribosomal protein L11	6	6	1	4	709				428	428	428	81f6f292c45231c81cff920b572a826a_8702	d5a5a6aae91cabb186fe594057e8ea03_9141	ea50daa39c6c4a0574d509aa68b507b7_5547	4cb190364575d751463119e92857d019_8776	E_coli_7_04474	4840fb5d2d4897d217f65ba1ef1b22a7_9098
smpB		SsrA-binding protein SmpB	6	6	1	4	4307				482	482	482	81f6f292c45231c81cff920b572a826a_2274	d5a5a6aae91cabb186fe594057e8ea03_2375	ea50daa39c6c4a0574d509aa68b507b7_8511	4cb190364575d751463119e92857d019_2278	E_coli_7_02611	4840fb5d2d4897d217f65ba1ef1b22a7_2835
ftsI		peptidoglycan glycosyltransferase FtsI	6	6	1	4	502				1766	1766	1766	81f6f292c45231c81cff920b572a826a_7540	d5a5a6aae91cabb186fe594057e8ea03_7862	ea50daa39c6c4a0574d509aa68b507b7_4438	4cb190364575d751463119e92857d019_7468	E_coli_7_01152	4840fb5d2d4897d217f65ba1ef1b22a7_8108
fic		putative adenosine monophosphate-protein transferase Fic	6	6	1	4	4892				602	602	602	81f6f292c45231c81cff920b572a826a_700	d5a5a6aae91cabb186fe594057e8ea03_725	ea50daa39c6c4a0574d509aa68b507b7_6891	4cb190364575d751463119e92857d019_710	E_coli_7_01663	4840fb5d2d4897d217f65ba1ef1b22a7_1291
rlmE		23S rRNA (uridine(2552)-2'-O)-methyltransferase RlmE	6	6	1	4	245				629	629	629	81f6f292c45231c81cff920b572a826a_1061	d5a5a6aae91cabb186fe594057e8ea03_1054	ea50daa39c6c4a0574d509aa68b507b7_7220	4cb190364575d751463119e92857d019_1071	E_coli_7_03600	4840fb5d2d4897d217f65ba1ef1b22a7_1620
fabA		bifunctional 3-hydroxydecanoyl-ACP dehydratase/trans-2-decenoyl-ACP isomerase	6	6	1	4	3494				518	626	536	81f6f292c45231c81cff920b572a826a_5702	d5a5a6aae91cabb186fe594057e8ea03_6050	ea50daa39c6c4a0574d509aa68b507b7_2672	4cb190364575d751463119e92857d019_5676	E_coli_7_03090	4840fb5d2d4897d217f65ba1ef1b22a7_6267
garP		galactarate/glucarate/glycerate transporter GarP	6	6	1	4	298				1334	1334	1334	81f6f292c45231c81cff920b572a826a_1173	d5a5a6aae91cabb186fe594057e8ea03_1166	ea50daa39c6c4a0574d509aa68b507b7_7332	4cb190364575d751463119e92857d019_1183	E_coli_7_03546	4840fb5d2d4897d217f65ba1ef1b22a7_1732
yeaL		DUF441 domain-containing protein	6	6	1	4	2958				446	446	446	81f6f292c45231c81cff920b572a826a_4124	d5a5a6aae91cabb186fe594057e8ea03_4184	ea50daa39c6c4a0574d509aa68b507b7_882	4cb190364575d751463119e92857d019_3961	E_coli_7_00612	4840fb5d2d4897d217f65ba1ef1b22a7_4571
nuoN		NADH-quinone oxidoreductase subunit NuoN	6	6	1	4	4157				1457	1457	1457	81f6f292c45231c81cff920b572a826a_2967	d5a5a6aae91cabb186fe594057e8ea03_3048	ea50daa39c6c4a0574d509aa68b507b7_9206	4cb190364575d751463119e92857d019_2956	E_coli_7_00125	4840fb5d2d4897d217f65ba1ef1b22a7_3540
dacB		serine-type D-Ala-D-Ala carboxypeptidase	6	6	1	4	242				1433	1433	1433	81f6f292c45231c81cff920b572a826a_1055	d5a5a6aae91cabb186fe594057e8ea03_1048	ea50daa39c6c4a0574d509aa68b507b7_7214	4cb190364575d751463119e92857d019_1065	E_coli_7_03603	4840fb5d2d4897d217f65ba1ef1b22a7_1614
acs		acetate--CoA ligase	6	6	1	4	1504				1958	1958	1958	81f6f292c45231c81cff920b572a826a_8462	d5a5a6aae91cabb186fe594057e8ea03_8834	ea50daa39c6c4a0574d509aa68b507b7_5239	4cb190364575d751463119e92857d019_8538	E_coli_7_02303	4840fb5d2d4897d217f65ba1ef1b22a7_8908
mlc		DNA-binding transcriptional repressor Mlc	6	6	1	4	3156				1220	1220	1220	81f6f292c45231c81cff920b572a826a_4528	d5a5a6aae91cabb186fe594057e8ea03_4578	ea50daa39c6c4a0574d509aa68b507b7_1286	4cb190364575d751463119e92857d019_4367	E_coli_7_00809	4840fb5d2d4897d217f65ba1ef1b22a7_4977
yfbS		SLC13 family permease	6	6	1	4	4140				1832	1832	1832	81f6f292c45231c81cff920b572a826a_2935	d5a5a6aae91cabb186fe594057e8ea03_3016	ea50daa39c6c4a0574d509aa68b507b7_9174	4cb190364575d751463119e92857d019_2924	E_coli_7_00108	4840fb5d2d4897d217f65ba1ef1b22a7_3508
nanT		sialic acid transporter NanT	6	6	1	4	205				1490	1490	1490	81f6f292c45231c81cff920b572a826a_981	d5a5a6aae91cabb186fe594057e8ea03_976	ea50daa39c6c4a0574d509aa68b507b7_7142	4cb190364575d751463119e92857d019_991	E_coli_7_03639	4840fb5d2d4897d217f65ba1ef1b22a7_1542
WP_000517100.1		hypothetical protein	6	6	1	4	5293				209	209	209	81f6f292c45231c81cff920b572a826a_213	d5a5a6aae91cabb186fe594057e8ea03_209	ea50daa39c6c4a0574d509aa68b507b7_6391	4cb190364575d751463119e92857d019_211	E_coli_7_02847	4840fb5d2d4897d217f65ba1ef1b22a7_787
trkA		Trk system potassium transporter TrkA	6	6	1	4	147				1376	1376	1376	81f6f292c45231c81cff920b572a826a_846	d5a5a6aae91cabb186fe594057e8ea03_843	ea50daa39c6c4a0574d509aa68b507b7_7009	4cb190364575d751463119e92857d019_856	E_coli_7_01590	4840fb5d2d4897d217f65ba1ef1b22a7_1409
ssuB		aliphatic sulfonates ABC transporter ATP-binding protein	6	6	1	4	3473				767	767	767	81f6f292c45231c81cff920b572a826a_5744	d5a5a6aae91cabb186fe594057e8ea03_6092	ea50daa39c6c4a0574d509aa68b507b7_2714	4cb190364575d751463119e92857d019_5718	E_coli_7_03111	4840fb5d2d4897d217f65ba1ef1b22a7_6309
ptsI		phosphoenolpyruvate-protein phosphotransferase PtsI	6	6	1	4	4014				1727	1727	1727	81f6f292c45231c81cff920b572a826a_2683	d5a5a6aae91cabb186fe594057e8ea03_2782	ea50daa39c6c4a0574d509aa68b507b7_8948	4cb190364575d751463119e92857d019_2687	E_coli_7_04548	4840fb5d2d4897d217f65ba1ef1b22a7_3274
deoD		purine-nucleoside phosphorylase	6	6	1	4	1452				719	719	719	81f6f292c45231c81cff920b572a826a_7746	d5a5a6aae91cabb186fe594057e8ea03_8072	ea50daa39c6c4a0574d509aa68b507b7_4660	4cb190364575d751463119e92857d019_7674	E_coli_7_01055	4840fb5d2d4897d217f65ba1ef1b22a7_8318
ybjS		NAD(P)-dependent oxidoreductase	6	6	1	4	3408				1013	1013	1013	81f6f292c45231c81cff920b572a826a_5877	d5a5a6aae91cabb186fe594057e8ea03_6225	ea50daa39c6c4a0574d509aa68b507b7_2845	4cb190364575d751463119e92857d019_5851	E_coli_7_03176	4840fb5d2d4897d217f65ba1ef1b22a7_6442
ftnB		non-heme ferritin-like protein	6	6	1	4	2842				503	503	503	81f6f292c45231c81cff920b572a826a_3894	d5a5a6aae91cabb186fe594057e8ea03_3952	ea50daa39c6c4a0574d509aa68b507b7_620	4cb190364575d751463119e92857d019_3731	E_coli_7_00484	4840fb5d2d4897d217f65ba1ef1b22a7_4333
pyrB		aspartate carbamoyltransferase	6	6	1	4	624				935	935	935	81f6f292c45231c81cff920b572a826a_8108	d5a5a6aae91cabb186fe594057e8ea03_8307	ea50daa39c6c4a0574d509aa68b507b7_4883	4cb190364575d751463119e92857d019_8184	E_coli_7_04426	4840fb5d2d4897d217f65ba1ef1b22a7_8548
nlpI		lipoprotein NlpI	6	6	1	4	259				884	884	884	81f6f292c45231c81cff920b572a826a_1095	d5a5a6aae91cabb186fe594057e8ea03_1088	ea50daa39c6c4a0574d509aa68b507b7_7254	4cb190364575d751463119e92857d019_1105	E_coli_7_03584	4840fb5d2d4897d217f65ba1ef1b22a7_1654
proP		glycine betaine/L-proline transporter ProP	6	6	1	4	1541				1502	1502	1502	81f6f292c45231c81cff920b572a826a_8390	d5a5a6aae91cabb186fe594057e8ea03_8762	ea50daa39c6c4a0574d509aa68b507b7_5167	4cb190364575d751463119e92857d019_8466	E_coli_7_02266	4840fb5d2d4897d217f65ba1ef1b22a7_8836
yfcL		YfcL family protein	6	6	1	4	4106				278	278	278	81f6f292c45231c81cff920b572a826a_2869	d5a5a6aae91cabb186fe594057e8ea03_2950	ea50daa39c6c4a0574d509aa68b507b7_9108	4cb190364575d751463119e92857d019_2858	E_coli_7_00075	4840fb5d2d4897d217f65ba1ef1b22a7_3442
yceD		23S rRNA accumulation protein YceD	6	6	1	4	4377				521	521	521	81f6f292c45231c81cff920b572a826a_5449	d5a5a6aae91cabb186fe594057e8ea03_5700	ea50daa39c6c4a0574d509aa68b507b7_2407	4cb190364575d751463119e92857d019_5426	E_coli_7_03813	4840fb5d2d4897d217f65ba1ef1b22a7_5994
yadG		ABC transporter ATP-binding protein	6	6	1	4	2596				926	926	926	81f6f292c45231c81cff920b572a826a_7456	d5a5a6aae91cabb186fe594057e8ea03_7778	ea50daa39c6c4a0574d509aa68b507b7_4352	4cb190364575d751463119e92857d019_7384	E_coli_7_01193	4840fb5d2d4897d217f65ba1ef1b22a7_8024
focA		formate transporter FocA	6	6	1	4	3444				857	1196	913	81f6f292c45231c81cff920b572a826a_5802	d5a5a6aae91cabb186fe594057e8ea03_6150	ea50daa39c6c4a0574d509aa68b507b7_2772	4cb190364575d751463119e92857d019_5776	E_coli_7_03140	4840fb5d2d4897d217f65ba1ef1b22a7_6367
yraI		molecular chaperone	6	6	1	4	280				695	695	695	81f6f292c45231c81cff920b572a826a_1137	d5a5a6aae91cabb186fe594057e8ea03_1130	ea50daa39c6c4a0574d509aa68b507b7_7296	4cb190364575d751463119e92857d019_1147	E_coli_7_03564	4840fb5d2d4897d217f65ba1ef1b22a7_1696
lpxL		kdo(2)-lipid IV(A) lauroyltransferase	6	6	1	4	4344				920	920	920	81f6f292c45231c81cff920b572a826a_5515	d5a5a6aae91cabb186fe594057e8ea03_5766	ea50daa39c6c4a0574d509aa68b507b7_2473	4cb190364575d751463119e92857d019_5492	E_coli_7_03846	4840fb5d2d4897d217f65ba1ef1b22a7_6060
bamC		outer membrane protein assembly factor BamC	6	6	1	4	3953				1034	1034	1034	81f6f292c45231c81cff920b572a826a_2573	d5a5a6aae91cabb186fe594057e8ea03_2672	ea50daa39c6c4a0574d509aa68b507b7_8804	4cb190364575d751463119e92857d019_2577	E_coli_7_03501	4840fb5d2d4897d217f65ba1ef1b22a7_3164
emrR		multidrug efflux transporter EmrAB transcriptional repressor EmrR	6	6	1	4	1099				530	530	530	81f6f292c45231c81cff920b572a826a_2208	d5a5a6aae91cabb186fe594057e8ea03_2309	ea50daa39c6c4a0574d509aa68b507b7_8417	4cb190364575d751463119e92857d019_2209	E_coli_7_02644	4840fb5d2d4897d217f65ba1ef1b22a7_2747
yeiH		YeiH family protein	6	6	1	4	4262				1049	1049	1049	81f6f292c45231c81cff920b572a826a_3194	d5a5a6aae91cabb186fe594057e8ea03_3263	ea50daa39c6c4a0574d509aa68b507b7_9417	4cb190364575d751463119e92857d019_3167	E_coli_7_00229	4840fb5d2d4897d217f65ba1ef1b22a7_3753
ptsH		phosphocarrier protein Hpr	6	6	1	4	4015				257	257	257	81f6f292c45231c81cff920b572a826a_2685	d5a5a6aae91cabb186fe594057e8ea03_2784	ea50daa39c6c4a0574d509aa68b507b7_8950	4cb190364575d751463119e92857d019_2689	E_coli_7_04549	4840fb5d2d4897d217f65ba1ef1b22a7_3276
rhaM		L-rhamnose mutarotase	6	6	1	4	6065				314	314	314	81f6f292c45231c81cff920b572a826a_8879	d5a5a6aae91cabb186fe594057e8ea03_9318	ea50daa39c6c4a0574d509aa68b507b7_5720	4cb190364575d751463119e92857d019_8957	E_coli_7_04024	4840fb5d2d4897d217f65ba1ef1b22a7_142
tusA		sulfurtransferase TusA	6	6	1	4	5004				245	245	245	81f6f292c45231c81cff920b572a826a_496	d5a5a6aae91cabb186fe594057e8ea03_503	ea50daa39c6c4a0574d509aa68b507b7_6681	4cb190364575d751463119e92857d019_494	E_coli_7_01776	4840fb5d2d4897d217f65ba1ef1b22a7_1079
exuR		transcriptional regulator ExuR	6	6	1	4	5928				776	776	776	81f6f292c45231c81cff920b572a826a_1236	d5a5a6aae91cabb186fe594057e8ea03_1231	ea50daa39c6c4a0574d509aa68b507b7_7393	4cb190364575d751463119e92857d019_1248	E_coli_7_03874	4840fb5d2d4897d217f65ba1ef1b22a7_1797
sapD		peptide ABC transporter ATP-binding protein SapD	6	6	1	4	4571				992	992	992	81f6f292c45231c81cff920b572a826a_5054	d5a5a6aae91cabb186fe594057e8ea03_5191	ea50daa39c6c4a0574d509aa68b507b7_1900	4cb190364575d751463119e92857d019_5025	E_coli_7_02003	4840fb5d2d4897d217f65ba1ef1b22a7_5603
ycaD		MFS transporter	6	6	1	4	3438				1124	1148	1144	81f6f292c45231c81cff920b572a826a_5814	d5a5a6aae91cabb186fe594057e8ea03_6162	ea50daa39c6c4a0574d509aa68b507b7_2784	4cb190364575d751463119e92857d019_5788	E_coli_7_03146	4840fb5d2d4897d217f65ba1ef1b22a7_6379
yjfC		glutathionylspermidine synthase family protein	6	6	1	4	1616				1163	1163	1163	81f6f292c45231c81cff920b572a826a_8230	d5a5a6aae91cabb186fe594057e8ea03_8439	ea50daa39c6c4a0574d509aa68b507b7_5007	4cb190364575d751463119e92857d019_8306	E_coli_7_02189	4840fb5d2d4897d217f65ba1ef1b22a7_8676
glcC		transcriptional regulator GlcC	6	6	1	4	357				764	764	764	81f6f292c45231c81cff920b572a826a_1474	d5a5a6aae91cabb186fe594057e8ea03_1571	ea50daa39c6c4a0574d509aa68b507b7_7631	4cb190364575d751463119e92857d019_1494	E_coli_7_02568	4840fb5d2d4897d217f65ba1ef1b22a7_2037
arnE		4-amino-4-deoxy-L-arabinose-phosphoundecaprenol flippase subunit ArnE	6	6	1	4	4171				335	335	335	81f6f292c45231c81cff920b572a826a_2997	d5a5a6aae91cabb186fe594057e8ea03_3080	ea50daa39c6c4a0574d509aa68b507b7_9236	4cb190364575d751463119e92857d019_2986	E_coli_7_00139	4840fb5d2d4897d217f65ba1ef1b22a7_3570
yjfY		DUF1471 family protein YjfY	6	6	1	4	1630				275	275	275	81f6f292c45231c81cff920b572a826a_8202	d5a5a6aae91cabb186fe594057e8ea03_8411	ea50daa39c6c4a0574d509aa68b507b7_4979	4cb190364575d751463119e92857d019_8280	E_coli_7_02175	4840fb5d2d4897d217f65ba1ef1b22a7_8650
nudI		nucleoside triphosphatase NudI	6	6	1	4	4178				425	425	425	81f6f292c45231c81cff920b572a826a_3011	d5a5a6aae91cabb186fe594057e8ea03_3094	ea50daa39c6c4a0574d509aa68b507b7_9250	4cb190364575d751463119e92857d019_3000	E_coli_7_00146	4840fb5d2d4897d217f65ba1ef1b22a7_3584
efp		elongation factor P	6	6	1	4	1579				566	566	566	81f6f292c45231c81cff920b572a826a_8313	d5a5a6aae91cabb186fe594057e8ea03_8526	ea50daa39c6c4a0574d509aa68b507b7_5090	4cb190364575d751463119e92857d019_8389	E_coli_7_02228	4840fb5d2d4897d217f65ba1ef1b22a7_8759
pgrR		DNA-binding transcriptional regulator PgrR	6	6	1	4	4611				899	899	899	81f6f292c45231c81cff920b572a826a_4976	d5a5a6aae91cabb186fe594057e8ea03_5107	ea50daa39c6c4a0574d509aa68b507b7_1820	4cb190364575d751463119e92857d019_4947	E_coli_7_01965	4840fb5d2d4897d217f65ba1ef1b22a7_5523
ytfB		cell division protein YtfB	6	6	1	4	662				638	638	638	81f6f292c45231c81cff920b572a826a_8182	d5a5a6aae91cabb186fe594057e8ea03_8383	ea50daa39c6c4a0574d509aa68b507b7_4959	4cb190364575d751463119e92857d019_8260	E_coli_7_02167	4840fb5d2d4897d217f65ba1ef1b22a7_8622
modC		molybdenum ABC transporter ATP-binding protein ModC	6	6	1	4	82				1058	1058	1058	81f6f292c45231c81cff920b572a826a_6094	d5a5a6aae91cabb186fe594057e8ea03_6440	ea50daa39c6c4a0574d509aa68b507b7_3060	4cb190364575d751463119e92857d019_6068	E_coli_7_03267	4840fb5d2d4897d217f65ba1ef1b22a7_6659
yidK		solute:sodium symporter family transporter	6	6	1	4	5211				1715	1715	1715	81f6f292c45231c81cff920b572a826a_48	d5a5a6aae91cabb186fe594057e8ea03_48	ea50daa39c6c4a0574d509aa68b507b7_6230	4cb190364575d751463119e92857d019_48	E_coli_7_02926	4840fb5d2d4897d217f65ba1ef1b22a7_622
ftsK		DNA translocase FtsK	6	6	1	4	3430				4067	4145	4086	81f6f292c45231c81cff920b572a826a_5830	d5a5a6aae91cabb186fe594057e8ea03_6178	ea50daa39c6c4a0574d509aa68b507b7_2800	4cb190364575d751463119e92857d019_5804	E_coli_7_03154	4840fb5d2d4897d217f65ba1ef1b22a7_6395
elaA		GNAT family N-acetyltransferase	6	6	1	4	4161				461	461	461	81f6f292c45231c81cff920b572a826a_2977	d5a5a6aae91cabb186fe594057e8ea03_3060	ea50daa39c6c4a0574d509aa68b507b7_9216	4cb190364575d751463119e92857d019_2966	E_coli_7_00129	4840fb5d2d4897d217f65ba1ef1b22a7_3550
ydiT		ferredoxin family protein	6	6	1	4	3049				293	293	293	81f6f292c45231c81cff920b572a826a_4301	d5a5a6aae91cabb186fe594057e8ea03_4349	ea50daa39c6c4a0574d509aa68b507b7_1063	4cb190364575d751463119e92857d019_4142	E_coli_7_00700	4840fb5d2d4897d217f65ba1ef1b22a7_4752
asnS		asparagine--tRNA ligase	6	6	1	4	3470				1400	1400	1400	81f6f292c45231c81cff920b572a826a_5750	d5a5a6aae91cabb186fe594057e8ea03_6098	ea50daa39c6c4a0574d509aa68b507b7_2720	4cb190364575d751463119e92857d019_5724	E_coli_7_03114	4840fb5d2d4897d217f65ba1ef1b22a7_6315
dacA		D-alanyl-D-alanine carboxypeptidase DacA	6	6	1	4	5382				1211	1211	1211	81f6f292c45231c81cff920b572a826a_6395	d5a5a6aae91cabb186fe594057e8ea03_6715	ea50daa39c6c4a0574d509aa68b507b7_3335	4cb190364575d751463119e92857d019_6369	E_coli_7_01330	4840fb5d2d4897d217f65ba1ef1b22a7_6929
ypdB		two-component system response regulator YpdB	6	6	1	4	4043				734	734	734	81f6f292c45231c81cff920b572a826a_2762	d5a5a6aae91cabb186fe594057e8ea03_2861	ea50daa39c6c4a0574d509aa68b507b7_9019	4cb190364575d751463119e92857d019_2769	E_coli_7_00025	4840fb5d2d4897d217f65ba1ef1b22a7_3353
mukF		chromosome partition protein MukF	6	6	1	4	3462				1322	1322	1322	81f6f292c45231c81cff920b572a826a_5766	d5a5a6aae91cabb186fe594057e8ea03_6114	ea50daa39c6c4a0574d509aa68b507b7_2736	4cb190364575d751463119e92857d019_5740	E_coli_7_03122	4840fb5d2d4897d217f65ba1ef1b22a7_6331
sohB		protease SohB	6	6	1	4	4546				1049	1049	1049	81f6f292c45231c81cff920b572a826a_5104	d5a5a6aae91cabb186fe594057e8ea03_5241	ea50daa39c6c4a0574d509aa68b507b7_1948	4cb190364575d751463119e92857d019_5075	E_coli_7_02025	4840fb5d2d4897d217f65ba1ef1b22a7_5653
hcaF		3-phenylpropionate/cinnamic acid dioxygenase subunit beta	6	6	1	4	3876				518	518	518	81f6f292c45231c81cff920b572a826a_2445	d5a5a6aae91cabb186fe594057e8ea03_2546	ea50daa39c6c4a0574d509aa68b507b7_8678	4cb190364575d751463119e92857d019_2449	E_coli_7_03435	4840fb5d2d4897d217f65ba1ef1b22a7_3004
rpoH		RNA polymerase sigma factor RpoH	6	6	1	4	4995				854	854	854	81f6f292c45231c81cff920b572a826a_514	d5a5a6aae91cabb186fe594057e8ea03_521	ea50daa39c6c4a0574d509aa68b507b7_6699	4cb190364575d751463119e92857d019_512	E_coli_7_01767	4840fb5d2d4897d217f65ba1ef1b22a7_1097
gutM		transcriptional regulator GutM	6	6	1	4	1082				359	359	359	81f6f292c45231c81cff920b572a826a_2159	d5a5a6aae91cabb186fe594057e8ea03_2260	ea50daa39c6c4a0574d509aa68b507b7_8368	4cb190364575d751463119e92857d019_2160	E_coli_7_02667	4840fb5d2d4897d217f65ba1ef1b22a7_2698
ybjX		VirK/YbjX family protein	6	6	1	4	3417				956	992	962	81f6f292c45231c81cff920b572a826a_5859	d5a5a6aae91cabb186fe594057e8ea03_6207	ea50daa39c6c4a0574d509aa68b507b7_2827	4cb190364575d751463119e92857d019_5833	E_coli_7_03167	4840fb5d2d4897d217f65ba1ef1b22a7_6424
kgtP		alpha-ketoglutarate permease	6	6	1	4	3825				1298	1298	1298	81f6f292c45231c81cff920b572a826a_2343	d5a5a6aae91cabb186fe594057e8ea03_2442	ea50daa39c6c4a0574d509aa68b507b7_8578	4cb190364575d751463119e92857d019_2347	E_coli_7_03387	4840fb5d2d4897d217f65ba1ef1b22a7_2902
fkpB		FKBP-type peptidyl-prolyl cis-trans isomerase	6	6	1	4	444				449	449	449	81f6f292c45231c81cff920b572a826a_7655	d5a5a6aae91cabb186fe594057e8ea03_7975	ea50daa39c6c4a0574d509aa68b507b7_4545	4cb190364575d751463119e92857d019_7581	E_coli_7_01098	4840fb5d2d4897d217f65ba1ef1b22a7_8227
gntP		gluconate permease GntP	6	6	1	4	1363				1343	1343	1343	81f6f292c45231c81cff920b572a826a_7896	d5a5a6aae91cabb186fe594057e8ea03_8211	ea50daa39c6c4a0574d509aa68b507b7_4799	4cb190364575d751463119e92857d019_7931	E_coli_7_00981	4840fb5d2d4897d217f65ba1ef1b22a7_8457
sthA		Si-specific NAD(P)(+) transhydrogenase	6	6	1	4	697				1400	1400	1400	81f6f292c45231c81cff920b572a826a_8751	d5a5a6aae91cabb186fe594057e8ea03_9190	ea50daa39c6c4a0574d509aa68b507b7_5596	4cb190364575d751463119e92857d019_8825	E_coli_7_04086	4840fb5d2d4897d217f65ba1ef1b22a7_14
cspD		cold shock-like protein CspD	6	6	1	4	3420				224	224	224	81f6f292c45231c81cff920b572a826a_5853	d5a5a6aae91cabb186fe594057e8ea03_6201	ea50daa39c6c4a0574d509aa68b507b7_2821	4cb190364575d751463119e92857d019_5827	E_coli_7_03164	4840fb5d2d4897d217f65ba1ef1b22a7_6418
lolA		outer membrane lipoprotein chaperone LolA	6	6	1	4	3431				611	611	611	81f6f292c45231c81cff920b572a826a_5828	d5a5a6aae91cabb186fe594057e8ea03_6176	ea50daa39c6c4a0574d509aa68b507b7_2798	4cb190364575d751463119e92857d019_5802	E_coli_7_03153	4840fb5d2d4897d217f65ba1ef1b22a7_6393
ydgI		amino acid permease	6	6	1	4	3144				1382	1382	1382	81f6f292c45231c81cff920b572a826a_4502	d5a5a6aae91cabb186fe594057e8ea03_4550	ea50daa39c6c4a0574d509aa68b507b7_1262	4cb190364575d751463119e92857d019_4343	E_coli_7_00798	4840fb5d2d4897d217f65ba1ef1b22a7_4953
ytiA		DUF3343 domain-containing protein	6	6	1	4	1378				257	257	257	81f6f292c45231c81cff920b572a826a_7868	d5a5a6aae91cabb186fe594057e8ea03_8183	ea50daa39c6c4a0574d509aa68b507b7_4771	4cb190364575d751463119e92857d019_7903	E_coli_7_00995	4840fb5d2d4897d217f65ba1ef1b22a7_8429
ygdD		DUF423 domain-containing protein	6	6	1	4	6274				395	395	395	81f6f292c45231c81cff920b572a826a_1947	d5a5a6aae91cabb186fe594057e8ea03_2040	ea50daa39c6c4a0574d509aa68b507b7_8152	4cb190364575d751463119e92857d019_1952	E_coli_7_02772	4840fb5d2d4897d217f65ba1ef1b22a7_2486
ptsG		PTS glucose transporter subunit IIBC	6	6	1	4	4390				1433	1433	1433	81f6f292c45231c81cff920b572a826a_5423	d5a5a6aae91cabb186fe594057e8ea03_5674	ea50daa39c6c4a0574d509aa68b507b7_2381	4cb190364575d751463119e92857d019_5400	E_coli_7_03800	4840fb5d2d4897d217f65ba1ef1b22a7_5968
potG		putrescine ABC transporter ATP-binding subunit PotG	6	6	1	4	3395				1133	1133	1133	81f6f292c45231c81cff920b572a826a_5903	d5a5a6aae91cabb186fe594057e8ea03_6251	ea50daa39c6c4a0574d509aa68b507b7_2873	4cb190364575d751463119e92857d019_5877	E_coli_7_03189	4840fb5d2d4897d217f65ba1ef1b22a7_6468
lysR		DNA-binding transcriptional regulator LysR	6	6	1	4	6218				935	935	935	81f6f292c45231c81cff920b572a826a_1818	d5a5a6aae91cabb186fe594057e8ea03_1915	ea50daa39c6c4a0574d509aa68b507b7_8075	4cb190364575d751463119e92857d019_1830	E_coli_7_02401	4840fb5d2d4897d217f65ba1ef1b22a7_2371
pepA		leucyl aminopeptidase	6	6	1	4	2303				1511	1511	1511	81f6f292c45231c81cff920b572a826a_8082	d5a5a6aae91cabb186fe594057e8ea03_8279	ea50daa39c6c4a0574d509aa68b507b7_4855	4cb190364575d751463119e92857d019_8158	E_coli_7_04437	4840fb5d2d4897d217f65ba1ef1b22a7_8522
fabD		ACP S-malonyltransferase	6	6	1	4	4381				929	929	929	81f6f292c45231c81cff920b572a826a_5441	d5a5a6aae91cabb186fe594057e8ea03_5692	ea50daa39c6c4a0574d509aa68b507b7_2399	4cb190364575d751463119e92857d019_5418	E_coli_7_03809	4840fb5d2d4897d217f65ba1ef1b22a7_5986
sspA		stringent starvation protein A	6	6	1	4	200				638	638	638	81f6f292c45231c81cff920b572a826a_971	d5a5a6aae91cabb186fe594057e8ea03_966	ea50daa39c6c4a0574d509aa68b507b7_7132	4cb190364575d751463119e92857d019_981	E_coli_7_03644	4840fb5d2d4897d217f65ba1ef1b22a7_1532
groL		chaperonin GroEL	6	6	1	4	1575				1646	1646	1646	81f6f292c45231c81cff920b572a826a_8321	d5a5a6aae91cabb186fe594057e8ea03_8536	ea50daa39c6c4a0574d509aa68b507b7_5098	4cb190364575d751463119e92857d019_8397	E_coli_7_02232	4840fb5d2d4897d217f65ba1ef1b22a7_8767
rmuC		DNA recombination protein RmuC	6	6	1	4	1141				1427	1427	1427	81f6f292c45231c81cff920b572a826a_9028	d5a5a6aae91cabb186fe594057e8ea03_9461	ea50daa39c6c4a0574d509aa68b507b7_5867	4cb190364575d751463119e92857d019_9102	E_coli_7_04282	4840fb5d2d4897d217f65ba1ef1b22a7_289
barA		two-component sensor histidine kinase BarA	6	6	1	4	6295				2756	2756	2756	81f6f292c45231c81cff920b572a826a_1989	d5a5a6aae91cabb186fe594057e8ea03_2082	ea50daa39c6c4a0574d509aa68b507b7_8194	4cb190364575d751463119e92857d019_1994	E_coli_7_02751	4840fb5d2d4897d217f65ba1ef1b22a7_2528
yciA		acyl-CoA thioester hydrolase YciA	6	6	1	4	4525				398	398	398	81f6f292c45231c81cff920b572a826a_5149	d5a5a6aae91cabb186fe594057e8ea03_5280	ea50daa39c6c4a0574d509aa68b507b7_2104	4cb190364575d751463119e92857d019_5120	E_coli_7_02046	4840fb5d2d4897d217f65ba1ef1b22a7_5692
ygiB		DUF1190 family protein	6	6	1	4	5992				671	671	671	81f6f292c45231c81cff920b572a826a_1362	d5a5a6aae91cabb186fe594057e8ea03_1453	ea50daa39c6c4a0574d509aa68b507b7_7519	4cb190364575d751463119e92857d019_1376	E_coli_7_03933	4840fb5d2d4897d217f65ba1ef1b22a7_1923
crcB		fluoride efflux transporter CrcB	6	6	1	4	5389				383	383	383	81f6f292c45231c81cff920b572a826a_6409	d5a5a6aae91cabb186fe594057e8ea03_6729	ea50daa39c6c4a0574d509aa68b507b7_3349	4cb190364575d751463119e92857d019_6383	E_coli_7_01337	4840fb5d2d4897d217f65ba1ef1b22a7_6943
nfsA		nitroreductase NfsA	6	6	1	4	3391				722	722	722	81f6f292c45231c81cff920b572a826a_5911	d5a5a6aae91cabb186fe594057e8ea03_6259	ea50daa39c6c4a0574d509aa68b507b7_2881	4cb190364575d751463119e92857d019_5885	E_coli_7_03193	4840fb5d2d4897d217f65ba1ef1b22a7_6476
rplN		50S ribosomal protein L14	6	6	1	4	126				371	371	371	81f6f292c45231c81cff920b572a826a_804	d5a5a6aae91cabb186fe594057e8ea03_801	ea50daa39c6c4a0574d509aa68b507b7_6967	4cb190364575d751463119e92857d019_814	E_coli_7_01611	4840fb5d2d4897d217f65ba1ef1b22a7_1367
group_4151	ilvN	acetolactate synthase small subunit	6	6	1	4	5222				290	290	290	81f6f292c45231c81cff920b572a826a_70	d5a5a6aae91cabb186fe594057e8ea03_70	ea50daa39c6c4a0574d509aa68b507b7_6250	4cb190364575d751463119e92857d019_70	E_coli_7_02917	4840fb5d2d4897d217f65ba1ef1b22a7_644
rpmG		50S ribosomal protein L33	6	6	1	4	5255				167	167	167	81f6f292c45231c81cff920b572a826a_145	d5a5a6aae91cabb186fe594057e8ea03_141	ea50daa39c6c4a0574d509aa68b507b7_6323	4cb190364575d751463119e92857d019_143	E_coli_7_02881	4840fb5d2d4897d217f65ba1ef1b22a7_719
agaW		PTS N-acetylgalactosamine transporter subunit IIC	6	6	1	4	291				779	779	779	81f6f292c45231c81cff920b572a826a_1159	d5a5a6aae91cabb186fe594057e8ea03_1152	ea50daa39c6c4a0574d509aa68b507b7_7318	4cb190364575d751463119e92857d019_1169	E_coli_7_03553	4840fb5d2d4897d217f65ba1ef1b22a7_1718
csrA		carbon storage regulator CsrA	6	6	1	4	1092				185	185	185	81f6f292c45231c81cff920b572a826a_2179	d5a5a6aae91cabb186fe594057e8ea03_2280	ea50daa39c6c4a0574d509aa68b507b7_8388	4cb190364575d751463119e92857d019_2180	E_coli_7_02657	4840fb5d2d4897d217f65ba1ef1b22a7_2718
yoaB		RidA family protein	6	6	1	4	2936				344	344	344	81f6f292c45231c81cff920b572a826a_4080	d5a5a6aae91cabb186fe594057e8ea03_4140	ea50daa39c6c4a0574d509aa68b507b7_834	4cb190364575d751463119e92857d019_3917	E_coli_7_00592	4840fb5d2d4897d217f65ba1ef1b22a7_4523
WP_001288227.1		hypothetical protein	6	6	1	4	6303				140	140	140	81f6f292c45231c81cff920b572a826a_2007	d5a5a6aae91cabb186fe594057e8ea03_2100	ea50daa39c6c4a0574d509aa68b507b7_8212	4cb190364575d751463119e92857d019_2012	E_coli_7_02742	4840fb5d2d4897d217f65ba1ef1b22a7_2546
atpG		F0F1 ATP synthase subunit gamma	6	6	1	4	5152				863	863	863	81f6f292c45231c81cff920b572a826a_9236	d5a5a6aae91cabb186fe594057e8ea03_9671	ea50daa39c6c4a0574d509aa68b507b7_6111	4cb190364575d751463119e92857d019_9310	E_coli_7_02983	4840fb5d2d4897d217f65ba1ef1b22a7_505
tmk		dTMP kinase	6	6	1	4	4387				641	641	641	81f6f292c45231c81cff920b572a826a_5429	d5a5a6aae91cabb186fe594057e8ea03_5680	ea50daa39c6c4a0574d509aa68b507b7_2387	4cb190364575d751463119e92857d019_5406	E_coli_7_03803	4840fb5d2d4897d217f65ba1ef1b22a7_5974
rpmE		50S ribosomal protein L31	6	6	1	4	5323				212	212	212	81f6f292c45231c81cff920b572a826a_8811	d5a5a6aae91cabb186fe594057e8ea03_9250	ea50daa39c6c4a0574d509aa68b507b7_5652	4cb190364575d751463119e92857d019_8885	E_coli_7_04059	4840fb5d2d4897d217f65ba1ef1b22a7_74
ybjJ		MFS transporter	6	6	1	4	3385				1127	1208	1194	81f6f292c45231c81cff920b572a826a_5923	d5a5a6aae91cabb186fe594057e8ea03_6271	ea50daa39c6c4a0574d509aa68b507b7_2893	4cb190364575d751463119e92857d019_5897	E_coli_7_03351	4840fb5d2d4897d217f65ba1ef1b22a7_6488
ybeL		zinc ribbon-containing protein	6	6	1	4	5371				482	482	482	81f6f292c45231c81cff920b572a826a_6373	d5a5a6aae91cabb186fe594057e8ea03_6693	ea50daa39c6c4a0574d509aa68b507b7_3313	4cb190364575d751463119e92857d019_6347	E_coli_7_01319	4840fb5d2d4897d217f65ba1ef1b22a7_6907
ccmE		cytochrome c maturation protein CcmE	6	6	1	4	4226				479	479	479	81f6f292c45231c81cff920b572a826a_3117	d5a5a6aae91cabb186fe594057e8ea03_3186	ea50daa39c6c4a0574d509aa68b507b7_9340	4cb190364575d751463119e92857d019_3090	E_coli_7_00191	4840fb5d2d4897d217f65ba1ef1b22a7_3676
frr		ribosome recycling factor	6	6	1	4	2553				557	557	557	81f6f292c45231c81cff920b572a826a_7366	d5a5a6aae91cabb186fe594057e8ea03_7683	ea50daa39c6c4a0574d509aa68b507b7_4264	4cb190364575d751463119e92857d019_7292	E_coli_7_01237	4840fb5d2d4897d217f65ba1ef1b22a7_7934
tolQ		Tol-Pal system protein TolQ	6	6	1	4	61				692	692	692	81f6f292c45231c81cff920b572a826a_6160	d5a5a6aae91cabb186fe594057e8ea03_6506	ea50daa39c6c4a0574d509aa68b507b7_3126	4cb190364575d751463119e92857d019_6134	E_coli_7_03239	4840fb5d2d4897d217f65ba1ef1b22a7_6722
csgE		curli production assembly/transport protein CsgE	6	6	1	4	4330				389	389	389	81f6f292c45231c81cff920b572a826a_5543	d5a5a6aae91cabb186fe594057e8ea03_5794	ea50daa39c6c4a0574d509aa68b507b7_2501	4cb190364575d751463119e92857d019_5520	E_coli_7_03016	4840fb5d2d4897d217f65ba1ef1b22a7_6088
group_4165	dcuC	anaerobic C4-dicarboxylate transporter DcuC	6	6	1	4	5392				1385	1385	1385	81f6f292c45231c81cff920b572a826a_6415	d5a5a6aae91cabb186fe594057e8ea03_6735	ea50daa39c6c4a0574d509aa68b507b7_3355	4cb190364575d751463119e92857d019_6389	E_coli_7_01340	4840fb5d2d4897d217f65ba1ef1b22a7_6949
yihD		YihD family protein	6	6	1	4	2090				269	269	269	81f6f292c45231c81cff920b572a826a_8975	d5a5a6aae91cabb186fe594057e8ea03_9408	ea50daa39c6c4a0574d509aa68b507b7_5814	4cb190364575d751463119e92857d019_9049	E_coli_7_03976	4840fb5d2d4897d217f65ba1ef1b22a7_236
hscA		Fe-S protein assembly chaperone HscA	6	6	1	4	3889				1850	1850	1850	81f6f292c45231c81cff920b572a826a_2471	d5a5a6aae91cabb186fe594057e8ea03_2572	ea50daa39c6c4a0574d509aa68b507b7_8704	4cb190364575d751463119e92857d019_2475	E_coli_7_03448	4840fb5d2d4897d217f65ba1ef1b22a7_3030
rpsE		30S ribosomal protein S5	6	6	1	4	133				503	503	503	81f6f292c45231c81cff920b572a826a_818	d5a5a6aae91cabb186fe594057e8ea03_815	ea50daa39c6c4a0574d509aa68b507b7_6981	4cb190364575d751463119e92857d019_828	E_coli_7_01604	4840fb5d2d4897d217f65ba1ef1b22a7_1381
paoA		aldehyde dehydrogenase iron-sulfur subunit	6	6	1	4	5839				689	689	689	81f6f292c45231c81cff920b572a826a_7014	d5a5a6aae91cabb186fe594057e8ea03_7383	ea50daa39c6c4a0574d509aa68b507b7_3954	4cb190364575d751463119e92857d019_6990	E_coli_7_04135	4840fb5d2d4897d217f65ba1ef1b22a7_7572
moeB		molybdopterin-synthase adenylyltransferase MoeB	6	6	1	4	3366				749	749	749	81f6f292c45231c81cff920b572a826a_5961	d5a5a6aae91cabb186fe594057e8ea03_6309	ea50daa39c6c4a0574d509aa68b507b7_2931	4cb190364575d751463119e92857d019_5935	E_coli_7_03331	4840fb5d2d4897d217f65ba1ef1b22a7_6526
hslU		HslU--HslV peptidase ATPase subunit	6	6	1	4	6039				1331	1331	1331	81f6f292c45231c81cff920b572a826a_8821	d5a5a6aae91cabb186fe594057e8ea03_9260	ea50daa39c6c4a0574d509aa68b507b7_5662	4cb190364575d751463119e92857d019_8895	E_coli_7_04054	4840fb5d2d4897d217f65ba1ef1b22a7_84
rplP		50S ribosomal protein L16	6	6	1	4	123				410	410	410	81f6f292c45231c81cff920b572a826a_798	d5a5a6aae91cabb186fe594057e8ea03_795	ea50daa39c6c4a0574d509aa68b507b7_6961	4cb190364575d751463119e92857d019_808	E_coli_7_01614	4840fb5d2d4897d217f65ba1ef1b22a7_1361
yjdC		transcriptional regulator	6	6	1	4	1567				575	575	575	81f6f292c45231c81cff920b572a826a_8337	d5a5a6aae91cabb186fe594057e8ea03_8552	ea50daa39c6c4a0574d509aa68b507b7_5114	4cb190364575d751463119e92857d019_8413	E_coli_7_02240	4840fb5d2d4897d217f65ba1ef1b22a7_8783
rpsM		30S ribosomal protein S13	6	6	1	4	138				356	356	356	81f6f292c45231c81cff920b572a826a_828	d5a5a6aae91cabb186fe594057e8ea03_825	ea50daa39c6c4a0574d509aa68b507b7_6991	4cb190364575d751463119e92857d019_838	E_coli_7_01599	4840fb5d2d4897d217f65ba1ef1b22a7_1391
uspG		universal stress protein UspG	6	6	1	4	5406				428	428	428	81f6f292c45231c81cff920b572a826a_6441	d5a5a6aae91cabb186fe594057e8ea03_6761	ea50daa39c6c4a0574d509aa68b507b7_3381	4cb190364575d751463119e92857d019_6415	E_coli_7_01354	4840fb5d2d4897d217f65ba1ef1b22a7_6975
ilvN		acetolactate synthase small subunit	6	6	1	4	496				491	491	491	81f6f292c45231c81cff920b572a826a_7552	d5a5a6aae91cabb186fe594057e8ea03_7874	ea50daa39c6c4a0574d509aa68b507b7_4450	4cb190364575d751463119e92857d019_7480	E_coli_7_01147	4840fb5d2d4897d217f65ba1ef1b22a7_8120
folP		dihydropteroate synthase	6	6	1	4	247				848	848	848	81f6f292c45231c81cff920b572a826a_1065	d5a5a6aae91cabb186fe594057e8ea03_1058	ea50daa39c6c4a0574d509aa68b507b7_7224	4cb190364575d751463119e92857d019_1075	E_coli_7_03598	4840fb5d2d4897d217f65ba1ef1b22a7_1624
hcaE		aromatic ring-hydroxylating dioxygenase subunit alpha	6	6	1	4	3877				1361	1361	1361	81f6f292c45231c81cff920b572a826a_2447	d5a5a6aae91cabb186fe594057e8ea03_2548	ea50daa39c6c4a0574d509aa68b507b7_8680	4cb190364575d751463119e92857d019_2451	E_coli_7_03436	4840fb5d2d4897d217f65ba1ef1b22a7_3006
yoeB		type II toxin-antitoxin system mRNA interferase toxin YoeB	6	6	1	4	1765				254	254	254	81f6f292c45231c81cff920b572a826a_3581	d5a5a6aae91cabb186fe594057e8ea03_3551	ea50daa39c6c4a0574d509aa68b507b7_200	4cb190364575d751463119e92857d019_3527	E_coli_7_00364	4840fb5d2d4897d217f65ba1ef1b22a7_4119
ybjM		inner membrane protein YbjM	6	6	1	4	3388				377	377	377	81f6f292c45231c81cff920b572a826a_5917	d5a5a6aae91cabb186fe594057e8ea03_6265	ea50daa39c6c4a0574d509aa68b507b7_2887	4cb190364575d751463119e92857d019_5891	E_coli_7_03196	4840fb5d2d4897d217f65ba1ef1b22a7_6482
group_418	fsa	fructose-6-phosphate aldolase	6	6	1	4	3365				662	662	662	81f6f292c45231c81cff920b572a826a_5963	d5a5a6aae91cabb186fe594057e8ea03_6311	ea50daa39c6c4a0574d509aa68b507b7_2933	4cb190364575d751463119e92857d019_5937	E_coli_7_03330	4840fb5d2d4897d217f65ba1ef1b22a7_6528
iscX		Fe-S cluster assembly protein IscX	6	6	1	4	3891				200	200	200	81f6f292c45231c81cff920b572a826a_2475	d5a5a6aae91cabb186fe594057e8ea03_2576	ea50daa39c6c4a0574d509aa68b507b7_8708	4cb190364575d751463119e92857d019_2479	E_coli_7_03450	4840fb5d2d4897d217f65ba1ef1b22a7_3034
ydiY		YdiY family protein	6	6	1	4	3026				758	758	758	81f6f292c45231c81cff920b572a826a_4256	d5a5a6aae91cabb186fe594057e8ea03_4304	ea50daa39c6c4a0574d509aa68b507b7_1018	4cb190364575d751463119e92857d019_4097	E_coli_7_00678	4840fb5d2d4897d217f65ba1ef1b22a7_4707
ynjF		CDP-alcohol phosphatidyltransferase family protein	6	6	1	4	2989				620	620	620	81f6f292c45231c81cff920b572a826a_4186	d5a5a6aae91cabb186fe594057e8ea03_4230	ea50daa39c6c4a0574d509aa68b507b7_944	4cb190364575d751463119e92857d019_4025	E_coli_7_00642	4840fb5d2d4897d217f65ba1ef1b22a7_4633
cpoB		cell division protein CpoB	6	6	1	4	66				791	791	791	81f6f292c45231c81cff920b572a826a_6150	d5a5a6aae91cabb186fe594057e8ea03_6496	ea50daa39c6c4a0574d509aa68b507b7_3116	4cb190364575d751463119e92857d019_6124	E_coli_7_03244	4840fb5d2d4897d217f65ba1ef1b22a7_6712
rpsL		30S ribosomal protein S12	6	6	1	4	4872				374	374	374	81f6f292c45231c81cff920b572a826a_740	d5a5a6aae91cabb186fe594057e8ea03_765	ea50daa39c6c4a0574d509aa68b507b7_6931	4cb190364575d751463119e92857d019_750	E_coli_7_01643	4840fb5d2d4897d217f65ba1ef1b22a7_1331
rpsG		30S ribosomal protein S7	6	6	1	4	4871				470	470	470	81f6f292c45231c81cff920b572a826a_742	d5a5a6aae91cabb186fe594057e8ea03_767	ea50daa39c6c4a0574d509aa68b507b7_6933	4cb190364575d751463119e92857d019_752	E_coli_7_01642	4840fb5d2d4897d217f65ba1ef1b22a7_1333
atpD		F0F1 ATP synthase subunit beta	6	6	1	4	5153				1382	1382	1382	81f6f292c45231c81cff920b572a826a_9238	d5a5a6aae91cabb186fe594057e8ea03_9673	ea50daa39c6c4a0574d509aa68b507b7_6113	4cb190364575d751463119e92857d019_9312	E_coli_7_02982	4840fb5d2d4897d217f65ba1ef1b22a7_507
uvrB		excinuclease ABC subunit UvrB	6	6	1	4	96				2021	2021	2021	81f6f292c45231c81cff920b572a826a_6066	d5a5a6aae91cabb186fe594057e8ea03_6412	ea50daa39c6c4a0574d509aa68b507b7_3032	4cb190364575d751463119e92857d019_6040	E_coli_7_03281	4840fb5d2d4897d217f65ba1ef1b22a7_6631
gltS		sodium/glutamate symporter	6	6	1	4	5238				1205	1205	1205	81f6f292c45231c81cff920b572a826a_109	d5a5a6aae91cabb186fe594057e8ea03_107	ea50daa39c6c4a0574d509aa68b507b7_6289	4cb190364575d751463119e92857d019_109	E_coli_7_02898	4840fb5d2d4897d217f65ba1ef1b22a7_683
yhfY		PRD domain protein	6	6	1	4	4907				362	362	362	81f6f292c45231c81cff920b572a826a_670	d5a5a6aae91cabb186fe594057e8ea03_685	ea50daa39c6c4a0574d509aa68b507b7_6861	4cb190364575d751463119e92857d019_680	E_coli_7_01683	4840fb5d2d4897d217f65ba1ef1b22a7_1261
grcA		autonomous glycyl radical cofactor GrcA	6	6	1	4	3834				383	383	383	81f6f292c45231c81cff920b572a826a_2361	d5a5a6aae91cabb186fe594057e8ea03_2460	ea50daa39c6c4a0574d509aa68b507b7_8594	4cb190364575d751463119e92857d019_2365	E_coli_7_03395	4840fb5d2d4897d217f65ba1ef1b22a7_2920
yodD		peroxide/acid resistance protein YodD	6	6	1	4	2796				227	227	227	81f6f292c45231c81cff920b572a826a_3795	d5a5a6aae91cabb186fe594057e8ea03_3843	ea50daa39c6c4a0574d509aa68b507b7_509	4cb190364575d751463119e92857d019_3632	E_coli_7_00438	4840fb5d2d4897d217f65ba1ef1b22a7_4222
pfkA		6-phosphofructokinase	6	6	1	4	6054				962	962	962	81f6f292c45231c81cff920b572a826a_8851	d5a5a6aae91cabb186fe594057e8ea03_9290	ea50daa39c6c4a0574d509aa68b507b7_5692	4cb190364575d751463119e92857d019_8927	E_coli_7_04039	4840fb5d2d4897d217f65ba1ef1b22a7_114
yebT		lipid-binding membrane homeostasis protein YebT	6	6	1	4	2910				2633	2633	2633	81f6f292c45231c81cff920b572a826a_4028	d5a5a6aae91cabb186fe594057e8ea03_4088	ea50daa39c6c4a0574d509aa68b507b7_782	4cb190364575d751463119e92857d019_3865	E_coli_7_00567	4840fb5d2d4897d217f65ba1ef1b22a7_4471
oxyR		DNA-binding transcriptional regulator OxyR	6	6	1	4	696				917	917	917	81f6f292c45231c81cff920b572a826a_8753	d5a5a6aae91cabb186fe594057e8ea03_9192	ea50daa39c6c4a0574d509aa68b507b7_5598	4cb190364575d751463119e92857d019_8827	E_coli_7_04085	4840fb5d2d4897d217f65ba1ef1b22a7_16
flgI		flagellar basal body P-ring protein FlgI	6	6	1	4	4370				1097	1097	1097	81f6f292c45231c81cff920b572a826a_5463	d5a5a6aae91cabb186fe594057e8ea03_5714	ea50daa39c6c4a0574d509aa68b507b7_2421	4cb190364575d751463119e92857d019_5440	E_coli_7_03820	4840fb5d2d4897d217f65ba1ef1b22a7_6008
ypeB		DUF3820 family protein	6	6	1	4	4020				218	218	218	81f6f292c45231c81cff920b572a826a_2695	d5a5a6aae91cabb186fe594057e8ea03_2794	ea50daa39c6c4a0574d509aa68b507b7_8960	4cb190364575d751463119e92857d019_2699	E_coli_7_04554	4840fb5d2d4897d217f65ba1ef1b22a7_3286
tatE		twin-arginine translocase subunit TatE	6	6	1	4	5387				203	203	203	81f6f292c45231c81cff920b572a826a_6405	d5a5a6aae91cabb186fe594057e8ea03_6725	ea50daa39c6c4a0574d509aa68b507b7_3345	4cb190364575d751463119e92857d019_6379	E_coli_7_01335	4840fb5d2d4897d217f65ba1ef1b22a7_6939
relA		GTP pyrophosphokinase	6	6	1	4	6297				2234	2234	2234	81f6f292c45231c81cff920b572a826a_1993	d5a5a6aae91cabb186fe594057e8ea03_2086	ea50daa39c6c4a0574d509aa68b507b7_8198	4cb190364575d751463119e92857d019_1998	E_coli_7_02749	4840fb5d2d4897d217f65ba1ef1b22a7_2532
cvrA		potassium/proton antiporter	6	6	1	4	4462				1736	1736	1736	81f6f292c45231c81cff920b572a826a_5283	d5a5a6aae91cabb186fe594057e8ea03_5416	ea50daa39c6c4a0574d509aa68b507b7_2235	4cb190364575d751463119e92857d019_5256	E_coli_7_02111	4840fb5d2d4897d217f65ba1ef1b22a7_5824
WP_001066081.1		hypothetical protein	6	6	1	4	5134				143	212	154	81f6f292c45231c81cff920b572a826a_235	d5a5a6aae91cabb186fe594057e8ea03_247	ea50daa39c6c4a0574d509aa68b507b7_6427	4cb190364575d751463119e92857d019_233	E_coli_7_02836	4840fb5d2d4897d217f65ba1ef1b22a7_821
rimO		30S ribosomal protein S12 methylthiotransferase RimO	6	6	1	4	3375				1325	1325	1325	81f6f292c45231c81cff920b572a826a_5943	d5a5a6aae91cabb186fe594057e8ea03_6291	ea50daa39c6c4a0574d509aa68b507b7_2913	4cb190364575d751463119e92857d019_5917	E_coli_7_03340	4840fb5d2d4897d217f65ba1ef1b22a7_6508
WP_000339532.1		hypothetical protein	6	6	1	4	346				758	758	758	81f6f292c45231c81cff920b572a826a_1452	d5a5a6aae91cabb186fe594057e8ea03_1549	ea50daa39c6c4a0574d509aa68b507b7_7609	4cb190364575d751463119e92857d019_1472	E_coli_7_02579	4840fb5d2d4897d217f65ba1ef1b22a7_2015
plsC		1-acylglycerol-3-phosphate O-acyltransferase	6	6	1	4	6008				737	737	737	81f6f292c45231c81cff920b572a826a_1392	d5a5a6aae91cabb186fe594057e8ea03_1483	ea50daa39c6c4a0574d509aa68b507b7_7549	4cb190364575d751463119e92857d019_1412	E_coli_7_03948	4840fb5d2d4897d217f65ba1ef1b22a7_1953
rcnB		Ni(II)/Co(II) efflux transporter accessory subunit RcnB	6	6	1	4	3747				338	338	338	81f6f292c45231c81cff920b572a826a_3296	d5a5a6aae91cabb186fe594057e8ea03_3367	ea50daa39c6c4a0574d509aa68b507b7_9519	4cb190364575d751463119e92857d019_3267	E_coli_7_00280	4840fb5d2d4897d217f65ba1ef1b22a7_3853
WP_000805509.1		hypothetical protein	6	6	1	4	5231				293	293	293	81f6f292c45231c81cff920b572a826a_88	d5a5a6aae91cabb186fe594057e8ea03_88	ea50daa39c6c4a0574d509aa68b507b7_6268	4cb190364575d751463119e92857d019_88	E_coli_7_02908	4840fb5d2d4897d217f65ba1ef1b22a7_662
paaB		1,2-phenylacetyl-CoA epoxidase subunit B	6	6	1	4	4642				287	287	287	81f6f292c45231c81cff920b572a826a_4914	d5a5a6aae91cabb186fe594057e8ea03_5045	ea50daa39c6c4a0574d509aa68b507b7_1760	4cb190364575d751463119e92857d019_4885	E_coli_7_01934	4840fb5d2d4897d217f65ba1ef1b22a7_5461
recA		recombinase RecA	6	6	1	4	1089				1061	1061	1061	81f6f292c45231c81cff920b572a826a_2173	d5a5a6aae91cabb186fe594057e8ea03_2274	ea50daa39c6c4a0574d509aa68b507b7_8382	4cb190364575d751463119e92857d019_2174	E_coli_7_02660	4840fb5d2d4897d217f65ba1ef1b22a7_2712
malP		maltodextrin phosphorylase	6	6	1	4	4944				2393	2393	2393	81f6f292c45231c81cff920b572a826a_596	d5a5a6aae91cabb186fe594057e8ea03_615	ea50daa39c6c4a0574d509aa68b507b7_6791	4cb190364575d751463119e92857d019_606	E_coli_7_01721	4840fb5d2d4897d217f65ba1ef1b22a7_1191
pqiA		membrane integrity-associated transporter subunit PqiA	6	6	1	4	3490				1253	1253	1253	81f6f292c45231c81cff920b572a826a_5710	d5a5a6aae91cabb186fe594057e8ea03_6058	ea50daa39c6c4a0574d509aa68b507b7_2680	4cb190364575d751463119e92857d019_5684	E_coli_7_03094	4840fb5d2d4897d217f65ba1ef1b22a7_6275
arcB		aerobic respiration two-component sensor histidine kinase ArcB	6	6	1	4	214				2336	2336	2336	81f6f292c45231c81cff920b572a826a_999	d5a5a6aae91cabb186fe594057e8ea03_992	ea50daa39c6c4a0574d509aa68b507b7_7158	4cb190364575d751463119e92857d019_1009	E_coli_7_03631	4840fb5d2d4897d217f65ba1ef1b22a7_1558
ybiA		N-glycosidase YbiA	6	6	1	4	116				449	482	476	81f6f292c45231c81cff920b572a826a_6027	d5a5a6aae91cabb186fe594057e8ea03_6371	ea50daa39c6c4a0574d509aa68b507b7_2991	4cb190364575d751463119e92857d019_6001	E_coli_7_03300	4840fb5d2d4897d217f65ba1ef1b22a7_6588
rhtC		threonine export protein RhtC	6	6	1	4	1150				620	620	620	81f6f292c45231c81cff920b572a826a_9046	d5a5a6aae91cabb186fe594057e8ea03_9479	ea50daa39c6c4a0574d509aa68b507b7_5885	4cb190364575d751463119e92857d019_9120	E_coli_7_04273	4840fb5d2d4897d217f65ba1ef1b22a7_307
ldtE		L,D-transpeptidase LdtE	6	6	1	4	3071				1004	1004	1004	81f6f292c45231c81cff920b572a826a_4348	d5a5a6aae91cabb186fe594057e8ea03_4396	ea50daa39c6c4a0574d509aa68b507b7_1110	4cb190364575d751463119e92857d019_4189	E_coli_7_00723	4840fb5d2d4897d217f65ba1ef1b22a7_4799
yicJ		glycoside-pentoside-hexuronide family transporter	6	6	1	4	5234				1382	1382	1382	81f6f292c45231c81cff920b572a826a_101	d5a5a6aae91cabb186fe594057e8ea03_99	ea50daa39c6c4a0574d509aa68b507b7_6281	4cb190364575d751463119e92857d019_101	E_coli_7_02902	4840fb5d2d4897d217f65ba1ef1b22a7_675
cbpM		chaperone modulator CbpM	6	6	1	4	3540				305	305	305	81f6f292c45231c81cff920b572a826a_5607	d5a5a6aae91cabb186fe594057e8ea03_5955	ea50daa39c6c4a0574d509aa68b507b7_2577	4cb190364575d751463119e92857d019_5581	E_coli_7_03046	4840fb5d2d4897d217f65ba1ef1b22a7_6172
ydcH		YdcH family protein	6	6	1	4	4673				224	224	224	81f6f292c45231c81cff920b572a826a_4852	d5a5a6aae91cabb186fe594057e8ea03_4983	ea50daa39c6c4a0574d509aa68b507b7_1700	4cb190364575d751463119e92857d019_4823	E_coli_7_01904	4840fb5d2d4897d217f65ba1ef1b22a7_5399
rspR		DNA-binding transcriptional regulator rspR	6	6	1	4	3198				686	686	686	81f6f292c45231c81cff920b572a826a_4564	d5a5a6aae91cabb186fe594057e8ea03_4712	ea50daa39c6c4a0574d509aa68b507b7_1438	4cb190364575d751463119e92857d019_4527	E_coli_7_00827	4840fb5d2d4897d217f65ba1ef1b22a7_5131
argR		transcriptional regulator ArgR	6	6	1	4	192				470	470	470	81f6f292c45231c81cff920b572a826a_955	d5a5a6aae91cabb186fe594057e8ea03_950	ea50daa39c6c4a0574d509aa68b507b7_7116	4cb190364575d751463119e92857d019_965	E_coli_7_03652	4840fb5d2d4897d217f65ba1ef1b22a7_1516
phoU		phosphate signaling complex protein PhoU	6	6	1	4	5164				725	725	725	81f6f292c45231c81cff920b572a826a_9262	d5a5a6aae91cabb186fe594057e8ea03_9697	ea50daa39c6c4a0574d509aa68b507b7_6137	4cb190364575d751463119e92857d019_9336	E_coli_7_02970	4840fb5d2d4897d217f65ba1ef1b22a7_531
yfgO		AI-2E family transporter	6	6	1	4	3938				1061	1061	1061	81f6f292c45231c81cff920b572a826a_2541	d5a5a6aae91cabb186fe594057e8ea03_2640	ea50daa39c6c4a0574d509aa68b507b7_8772	4cb190364575d751463119e92857d019_2545	E_coli_7_03482	4840fb5d2d4897d217f65ba1ef1b22a7_3132
ychE		NAAT family transporter YchE	6	6	1	4	4511				647	647	647	81f6f292c45231c81cff920b572a826a_5173	d5a5a6aae91cabb186fe594057e8ea03_5306	ea50daa39c6c4a0574d509aa68b507b7_2130	4cb190364575d751463119e92857d019_5146	E_coli_7_02059	4840fb5d2d4897d217f65ba1ef1b22a7_5718
ybhM		Bax inhibitor-1/YccA family protein	6	6	1	4	105				713	713	713	81f6f292c45231c81cff920b572a826a_6049	d5a5a6aae91cabb186fe594057e8ea03_6393	ea50daa39c6c4a0574d509aa68b507b7_3013	4cb190364575d751463119e92857d019_6023	E_coli_7_03289	4840fb5d2d4897d217f65ba1ef1b22a7_6612
rplY		50S ribosomal protein L25	6	6	1	4	4234				284	284	284	81f6f292c45231c81cff920b572a826a_3138	d5a5a6aae91cabb186fe594057e8ea03_3207	ea50daa39c6c4a0574d509aa68b507b7_9361	4cb190364575d751463119e92857d019_3111	E_coli_7_00201	4840fb5d2d4897d217f65ba1ef1b22a7_3697
nrfF		heme lyase NrfEFG subunit NrfF	6	6	1	4	1510				383	383	383	81f6f292c45231c81cff920b572a826a_8450	d5a5a6aae91cabb186fe594057e8ea03_8822	ea50daa39c6c4a0574d509aa68b507b7_5227	4cb190364575d751463119e92857d019_8526	E_coli_7_02297	4840fb5d2d4897d217f65ba1ef1b22a7_8896
treF		alpha,alpha-trehalase	6	6	1	4	5058				1649	1649	1649	81f6f292c45231c81cff920b572a826a_392	d5a5a6aae91cabb186fe594057e8ea03_399	ea50daa39c6c4a0574d509aa68b507b7_6581	4cb190364575d751463119e92857d019_390	E_coli_7_01826	4840fb5d2d4897d217f65ba1ef1b22a7_975
gntK		gluconokinase	6	6	1	4	4968				527	527	527	81f6f292c45231c81cff920b572a826a_552	d5a5a6aae91cabb186fe594057e8ea03_567	ea50daa39c6c4a0574d509aa68b507b7_6745	4cb190364575d751463119e92857d019_562	E_coli_7_01742	4840fb5d2d4897d217f65ba1ef1b22a7_1143
purA		adenylosuccinate synthase	6	6	1	4	1607				1298	1298	1298	81f6f292c45231c81cff920b572a826a_8248	d5a5a6aae91cabb186fe594057e8ea03_8457	ea50daa39c6c4a0574d509aa68b507b7_5025	4cb190364575d751463119e92857d019_8324	E_coli_7_02198	4840fb5d2d4897d217f65ba1ef1b22a7_8694
map		type I methionyl aminopeptidase	6	6	1	4	2557				794	794	794	81f6f292c45231c81cff920b572a826a_7374	d5a5a6aae91cabb186fe594057e8ea03_7691	ea50daa39c6c4a0574d509aa68b507b7_4272	4cb190364575d751463119e92857d019_7300	E_coli_7_01233	4840fb5d2d4897d217f65ba1ef1b22a7_7942
rfbA		glucose-1-phosphate thymidylyltransferase RfbA	6	6	1	4	1187				881	881	881	81f6f292c45231c81cff920b572a826a_9122	d5a5a6aae91cabb186fe594057e8ea03_9557	ea50daa39c6c4a0574d509aa68b507b7_5961	4cb190364575d751463119e92857d019_9196	E_coli_7_04239	4840fb5d2d4897d217f65ba1ef1b22a7_391
rhlE		ATP-dependent RNA helicase RhlE	6	6	1	4	115				1364	1364	1364	81f6f292c45231c81cff920b572a826a_6029	d5a5a6aae91cabb186fe594057e8ea03_6373	ea50daa39c6c4a0574d509aa68b507b7_2993	4cb190364575d751463119e92857d019_6003	E_coli_7_03299	4840fb5d2d4897d217f65ba1ef1b22a7_6592
seqA		replication initiation negative regulator SeqA	6	6	1	4	5336				545	545	545	81f6f292c45231c81cff920b572a826a_6284	d5a5a6aae91cabb186fe594057e8ea03_6604	ea50daa39c6c4a0574d509aa68b507b7_3224	4cb190364575d751463119e92857d019_6258	E_coli_7_01278	4840fb5d2d4897d217f65ba1ef1b22a7_6818
exbB		tol-pal system-associated acyl-CoA thioesterase	6	6	1	4	6018				734	734	734	81f6f292c45231c81cff920b572a826a_1412	d5a5a6aae91cabb186fe594057e8ea03_1503	ea50daa39c6c4a0574d509aa68b507b7_7569	4cb190364575d751463119e92857d019_1432	E_coli_7_03958	4840fb5d2d4897d217f65ba1ef1b22a7_1973
moaD		molybdopterin synthase sulfur carrier subunit	6	6	1	4	101				245	245	245	81f6f292c45231c81cff920b572a826a_6055	d5a5a6aae91cabb186fe594057e8ea03_6401	ea50daa39c6c4a0574d509aa68b507b7_3021	4cb190364575d751463119e92857d019_6029	E_coli_7_03286	4840fb5d2d4897d217f65ba1ef1b22a7_6620
yibH		HlyD family secretion protein	6	6	1	4	5298				1136	1136	1136	81f6f292c45231c81cff920b572a826a_223	d5a5a6aae91cabb186fe594057e8ea03_219	ea50daa39c6c4a0574d509aa68b507b7_6401	4cb190364575d751463119e92857d019_221	E_coli_7_02842	4840fb5d2d4897d217f65ba1ef1b22a7_797
rplX		50S ribosomal protein L24	6	6	1	4	127				314	314	314	81f6f292c45231c81cff920b572a826a_806	d5a5a6aae91cabb186fe594057e8ea03_803	ea50daa39c6c4a0574d509aa68b507b7_6969	4cb190364575d751463119e92857d019_816	E_coli_7_01610	4840fb5d2d4897d217f65ba1ef1b22a7_1369
yejG		YejG family protein	6	6	1	4	4238				344	344	344	81f6f292c45231c81cff920b572a826a_3146	d5a5a6aae91cabb186fe594057e8ea03_3215	ea50daa39c6c4a0574d509aa68b507b7_9369	4cb190364575d751463119e92857d019_3119	E_coli_7_00205	4840fb5d2d4897d217f65ba1ef1b22a7_3705
rlmM		23S rRNA (cytidine(2498)-2'-O)-methyltransferase RlmM	6	6	1	4	6275				1100	1100	1100	81f6f292c45231c81cff920b572a826a_1949	d5a5a6aae91cabb186fe594057e8ea03_2042	ea50daa39c6c4a0574d509aa68b507b7_8154	4cb190364575d751463119e92857d019_1954	E_coli_7_02771	4840fb5d2d4897d217f65ba1ef1b22a7_2488
gadX		acid resistance transcriptional activator GadX	6	6	1	4	5055				824	824	824	81f6f292c45231c81cff920b572a826a_398	d5a5a6aae91cabb186fe594057e8ea03_405	ea50daa39c6c4a0574d509aa68b507b7_6587	4cb190364575d751463119e92857d019_396	E_coli_7_01823	4840fb5d2d4897d217f65ba1ef1b22a7_981
fadL		long-chain fatty acid transporter FadL	6	6	1	4	4081				1340	1340	1340	81f6f292c45231c81cff920b572a826a_2833	d5a5a6aae91cabb186fe594057e8ea03_2914	ea50daa39c6c4a0574d509aa68b507b7_9072	4cb190364575d751463119e92857d019_2822	E_coli_7_00057	4840fb5d2d4897d217f65ba1ef1b22a7_3406
bglJ		DNA-binding transcriptional activator BglJ	6	6	1	4	1423				677	677	677	81f6f292c45231c81cff920b572a826a_7783	d5a5a6aae91cabb186fe594057e8ea03_8115	ea50daa39c6c4a0574d509aa68b507b7_4703	4cb190364575d751463119e92857d019_7821	E_coli_7_01035	4840fb5d2d4897d217f65ba1ef1b22a7_8361
iscU		Fe-S cluster assembly scaffold IscU	6	6	1	4	3886				386	386	386	81f6f292c45231c81cff920b572a826a_2465	d5a5a6aae91cabb186fe594057e8ea03_2566	ea50daa39c6c4a0574d509aa68b507b7_8698	4cb190364575d751463119e92857d019_2469	E_coli_7_03445	4840fb5d2d4897d217f65ba1ef1b22a7_3024
cydA		cytochrome ubiquinol oxidase subunit I	6	6	1	4	56				1568	1568	1568	81f6f292c45231c81cff920b572a826a_6170	d5a5a6aae91cabb186fe594057e8ea03_6516	ea50daa39c6c4a0574d509aa68b507b7_3136	4cb190364575d751463119e92857d019_6144	E_coli_7_03234	4840fb5d2d4897d217f65ba1ef1b22a7_6732
yjbR		MmcQ/YjbR family DNA-binding protein	6	6	1	4	1492				356	356	356	81f6f292c45231c81cff920b572a826a_8486	d5a5a6aae91cabb186fe594057e8ea03_8858	ea50daa39c6c4a0574d509aa68b507b7_5263	4cb190364575d751463119e92857d019_8562	E_coli_7_02315	4840fb5d2d4897d217f65ba1ef1b22a7_8932
tolA		cell envelope integrity protein TolA	6	6	1	4	63				1184	1265	1251	81f6f292c45231c81cff920b572a826a_6156	d5a5a6aae91cabb186fe594057e8ea03_6502	ea50daa39c6c4a0574d509aa68b507b7_3122	4cb190364575d751463119e92857d019_6130	E_coli_7_03241	4840fb5d2d4897d217f65ba1ef1b22a7_6718
ibpA		heat shock chaperone IbpA	6	6	1	4	5203				413	413	413	81f6f292c45231c81cff920b572a826a_34	d5a5a6aae91cabb186fe594057e8ea03_34	ea50daa39c6c4a0574d509aa68b507b7_6216	4cb190364575d751463119e92857d019_34	E_coli_7_02934	4840fb5d2d4897d217f65ba1ef1b22a7_608
rbsC		ribose ABC transporter permease	6	6	1	4	1223				965	965	965	81f6f292c45231c81cff920b572a826a_9202	d5a5a6aae91cabb186fe594057e8ea03_9637	ea50daa39c6c4a0574d509aa68b507b7_6077	4cb190364575d751463119e92857d019_9276	E_coli_7_03000	4840fb5d2d4897d217f65ba1ef1b22a7_471
yajG		lipoprotein	6	6	1	4	5553				578	578	578	81f6f292c45231c81cff920b572a826a_6726	d5a5a6aae91cabb186fe594057e8ea03_7087	ea50daa39c6c4a0574d509aa68b507b7_3694	4cb190364575d751463119e92857d019_6700	E_coli_7_01492	4840fb5d2d4897d217f65ba1ef1b22a7_7278
pmrR		LpxT activity modulator PmrR	6	6	1	4	1542				89	89	89	81f6f292c45231c81cff920b572a826a_8388	d5a5a6aae91cabb186fe594057e8ea03_8760	ea50daa39c6c4a0574d509aa68b507b7_5165	4cb190364575d751463119e92857d019_8464	E_coli_7_02265	4840fb5d2d4897d217f65ba1ef1b22a7_8834
ygaC		DUF2002 family protein	6	6	1	4	1110				344	344	344	81f6f292c45231c81cff920b572a826a_2232	d5a5a6aae91cabb186fe594057e8ea03_2333	ea50daa39c6c4a0574d509aa68b507b7_8469	4cb190364575d751463119e92857d019_2233	E_coli_7_02632	4840fb5d2d4897d217f65ba1ef1b22a7_2771
ysaA		4Fe-4S binding protein	6	6	1	4	5115				473	473	473	81f6f292c45231c81cff920b572a826a_271	d5a5a6aae91cabb186fe594057e8ea03_279	ea50daa39c6c4a0574d509aa68b507b7_6463	4cb190364575d751463119e92857d019_269	E_coli_7_02818	4840fb5d2d4897d217f65ba1ef1b22a7_855
WP_000088114.1		fimbrial chaperone	6	6	1	4	5158				731	731	731	81f6f292c45231c81cff920b572a826a_9248	d5a5a6aae91cabb186fe594057e8ea03_9683	ea50daa39c6c4a0574d509aa68b507b7_6123	4cb190364575d751463119e92857d019_9322	E_coli_7_02977	4840fb5d2d4897d217f65ba1ef1b22a7_517
fdnH		formate dehydrogenase N subunit beta	6	6	1	4	3274				884	884	884	81f6f292c45231c81cff920b572a826a_4716	d5a5a6aae91cabb186fe594057e8ea03_4871	ea50daa39c6c4a0574d509aa68b507b7_1586	4cb190364575d751463119e92857d019_4687	E_coli_7_00900	4840fb5d2d4897d217f65ba1ef1b22a7_5283
rcsF		Rcs stress response system protein RcsF	6	6	1	4	6094				404	404	404	81f6f292c45231c81cff920b572a826a_7316	d5a5a6aae91cabb186fe594057e8ea03_7631	ea50daa39c6c4a0574d509aa68b507b7_4212	4cb190364575d751463119e92857d019_7242	E_coli_7_01263	4840fb5d2d4897d217f65ba1ef1b22a7_7882
yadS		TRIC cation channel family protein	6	6	1	4	2568				623	623	623	81f6f292c45231c81cff920b572a826a_7392	d5a5a6aae91cabb186fe594057e8ea03_7709	ea50daa39c6c4a0574d509aa68b507b7_4290	4cb190364575d751463119e92857d019_7320	E_coli_7_01223	4840fb5d2d4897d217f65ba1ef1b22a7_7960
ybgQ		fimbrial biogenesis outer membrane usher protein	6	6	1	4	41				344	2459	2105	81f6f292c45231c81cff920b572a826a_6200	d5a5a6aae91cabb186fe594057e8ea03_6546	ea50daa39c6c4a0574d509aa68b507b7_3166	4cb190364575d751463119e92857d019_6174	E_coli_7_03220	4840fb5d2d4897d217f65ba1ef1b22a7_6764
nuoJ		NADH-quinone oxidoreductase subunit J	6	6	1	4	4153				554	554	554	81f6f292c45231c81cff920b572a826a_2959	d5a5a6aae91cabb186fe594057e8ea03_3040	ea50daa39c6c4a0574d509aa68b507b7_9198	4cb190364575d751463119e92857d019_2948	E_coli_7_00121	4840fb5d2d4897d217f65ba1ef1b22a7_3532
phnC		phosphonate ABC transporter ATP-binding protein	6	6	1	4	1536				788	788	788	81f6f292c45231c81cff920b572a826a_8400	d5a5a6aae91cabb186fe594057e8ea03_8772	ea50daa39c6c4a0574d509aa68b507b7_5177	4cb190364575d751463119e92857d019_8476	E_coli_7_02271	4840fb5d2d4897d217f65ba1ef1b22a7_8846
yaeH		DUF3461 family protein	6	6	1	4	2562				386	386	386	81f6f292c45231c81cff920b572a826a_7380	d5a5a6aae91cabb186fe594057e8ea03_7697	ea50daa39c6c4a0574d509aa68b507b7_4278	4cb190364575d751463119e92857d019_7308	E_coli_7_01229	4840fb5d2d4897d217f65ba1ef1b22a7_7948
gap		type I glyceraldehyde-3-phosphate dehydrogenase	6	6	1	4	4664				1001	1001	1001	81f6f292c45231c81cff920b572a826a_4870	d5a5a6aae91cabb186fe594057e8ea03_5001	ea50daa39c6c4a0574d509aa68b507b7_1716	4cb190364575d751463119e92857d019_4841	E_coli_7_01912	4840fb5d2d4897d217f65ba1ef1b22a7_5417
malM		maltose operon protein MalM	6	6	1	4	792				920	920	920	81f6f292c45231c81cff920b572a826a_8528	d5a5a6aae91cabb186fe594057e8ea03_9020	ea50daa39c6c4a0574d509aa68b507b7_5426	4cb190364575d751463119e92857d019_8604	E_coli_7_02338	4840fb5d2d4897d217f65ba1ef1b22a7_8974
pssA		CDP-diacylglycerol--serine O-phosphatidyltransferase	6	6	1	4	3827				1355	1355	1355	81f6f292c45231c81cff920b572a826a_2347	d5a5a6aae91cabb186fe594057e8ea03_2446	ea50daa39c6c4a0574d509aa68b507b7_8582	4cb190364575d751463119e92857d019_2351	E_coli_7_03389	4840fb5d2d4897d217f65ba1ef1b22a7_2906
suhB		inositol-1-monophosphatase	6	6	1	4	3882				803	803	803	81f6f292c45231c81cff920b572a826a_2457	d5a5a6aae91cabb186fe594057e8ea03_2558	ea50daa39c6c4a0574d509aa68b507b7_8690	4cb190364575d751463119e92857d019_2461	E_coli_7_03441	4840fb5d2d4897d217f65ba1ef1b22a7_3016
apt		adenine phosphoribosyltransferase	6	6	1	4	5587				551	551	551	81f6f292c45231c81cff920b572a826a_6655	d5a5a6aae91cabb186fe594057e8ea03_7016	ea50daa39c6c4a0574d509aa68b507b7_3623	4cb190364575d751463119e92857d019_6629	E_coli_7_01458	4840fb5d2d4897d217f65ba1ef1b22a7_7207
yidJ		sulfatase-like hydrolase/transferase	6	6	1	4	5212				1493	1493	1493	81f6f292c45231c81cff920b572a826a_50	d5a5a6aae91cabb186fe594057e8ea03_50	ea50daa39c6c4a0574d509aa68b507b7_6232	4cb190364575d751463119e92857d019_50	E_coli_7_02925	4840fb5d2d4897d217f65ba1ef1b22a7_624
rnhB		ribonuclease HII	6	6	1	4	2541				596	596	596	81f6f292c45231c81cff920b572a826a_7344	d5a5a6aae91cabb186fe594057e8ea03_7661	ea50daa39c6c4a0574d509aa68b507b7_4242	4cb190364575d751463119e92857d019_7270	E_coli_7_01249	4840fb5d2d4897d217f65ba1ef1b22a7_7912
pxpA		5-oxoprolinase subunit PxpA	6	6	1	4	36				734	734	734	81f6f292c45231c81cff920b572a826a_6210	d5a5a6aae91cabb186fe594057e8ea03_6556	ea50daa39c6c4a0574d509aa68b507b7_3176	4cb190364575d751463119e92857d019_6184	E_coli_7_03215	4840fb5d2d4897d217f65ba1ef1b22a7_6774
osmY		molecular chaperone OsmY	6	6	1	4	1461				605	605	605	81f6f292c45231c81cff920b572a826a_7764	d5a5a6aae91cabb186fe594057e8ea03_8090	ea50daa39c6c4a0574d509aa68b507b7_4678	4cb190364575d751463119e92857d019_7692	E_coli_7_01046	4840fb5d2d4897d217f65ba1ef1b22a7_8336
cspA		RNA chaperone/antiterminator CspA	6	6	1	4	5097				212	212	212	81f6f292c45231c81cff920b572a826a_308	d5a5a6aae91cabb186fe594057e8ea03_315	ea50daa39c6c4a0574d509aa68b507b7_6497	4cb190364575d751463119e92857d019_306	E_coli_7_01871	4840fb5d2d4897d217f65ba1ef1b22a7_891
priB		primosomal replication protein N	6	6	1	4	1632				314	314	314	81f6f292c45231c81cff920b572a826a_8198	d5a5a6aae91cabb186fe594057e8ea03_8407	ea50daa39c6c4a0574d509aa68b507b7_4975	4cb190364575d751463119e92857d019_8276	E_coli_7_02173	4840fb5d2d4897d217f65ba1ef1b22a7_8646
pstS		phosphate ABC transporter substrate-binding protein PstS	6	6	1	4	5160				1040	1040	1040	81f6f292c45231c81cff920b572a826a_9254	d5a5a6aae91cabb186fe594057e8ea03_9689	ea50daa39c6c4a0574d509aa68b507b7_6129	4cb190364575d751463119e92857d019_9328	E_coli_7_02974	4840fb5d2d4897d217f65ba1ef1b22a7_523
dnaK		molecular chaperone DnaK	6	6	1	4	455				1916	1916	1916	81f6f292c45231c81cff920b572a826a_7681	d5a5a6aae91cabb186fe594057e8ea03_8005	ea50daa39c6c4a0574d509aa68b507b7_4513	4cb190364575d751463119e92857d019_7607	E_coli_7_01085	4840fb5d2d4897d217f65ba1ef1b22a7_8253
mlrA		HTH-type transcriptional regulator MlrA	6	6	1	4	3766				731	731	731	81f6f292c45231c81cff920b572a826a_3256	d5a5a6aae91cabb186fe594057e8ea03_3329	ea50daa39c6c4a0574d509aa68b507b7_9481	4cb190364575d751463119e92857d019_3229	E_coli_7_00260	4840fb5d2d4897d217f65ba1ef1b22a7_3815
yqjD		YqjD family protein	6	6	1	4	5923				305	305	305	81f6f292c45231c81cff920b572a826a_1226	d5a5a6aae91cabb186fe594057e8ea03_1221	ea50daa39c6c4a0574d509aa68b507b7_7385	4cb190364575d751463119e92857d019_1238	E_coli_7_03870	4840fb5d2d4897d217f65ba1ef1b22a7_1787
csgF		curli production assembly/transport protein CsgF	6	6	1	4	4329				416	416	416	81f6f292c45231c81cff920b572a826a_5545	d5a5a6aae91cabb186fe594057e8ea03_5796	ea50daa39c6c4a0574d509aa68b507b7_2503	4cb190364575d751463119e92857d019_5522	E_coli_7_03017	4840fb5d2d4897d217f65ba1ef1b22a7_6090
guaD		guanine deaminase	6	6	1	4	6169				1316	1316	1316	81f6f292c45231c81cff920b572a826a_1713	d5a5a6aae91cabb186fe594057e8ea03_1804	ea50daa39c6c4a0574d509aa68b507b7_7968	4cb190364575d751463119e92857d019_1725	E_coli_7_02457	4840fb5d2d4897d217f65ba1ef1b22a7_2266
ais		lipopolysaccharide core heptose(II)-phosphate phosphatase Ais	6	6	1	4	4177				602	602	602	81f6f292c45231c81cff920b572a826a_3009	d5a5a6aae91cabb186fe594057e8ea03_3092	ea50daa39c6c4a0574d509aa68b507b7_9248	4cb190364575d751463119e92857d019_2998	E_coli_7_00145	4840fb5d2d4897d217f65ba1ef1b22a7_3582
ybgA		YbgA family protein	6	6	1	4	5306				509	509	509	81f6f292c45231c81cff920b572a826a_6222	d5a5a6aae91cabb186fe594057e8ea03_6568	ea50daa39c6c4a0574d509aa68b507b7_3188	4cb190364575d751463119e92857d019_6196	E_coli_7_03209	4840fb5d2d4897d217f65ba1ef1b22a7_6786
msbA		lipid A ABC transporter ATP-binding protein/permease MsbA	6	6	1	4	3454				1748	1748	1748	81f6f292c45231c81cff920b572a826a_5782	d5a5a6aae91cabb186fe594057e8ea03_6130	ea50daa39c6c4a0574d509aa68b507b7_2752	4cb190364575d751463119e92857d019_5756	E_coli_7_03130	4840fb5d2d4897d217f65ba1ef1b22a7_6347
yigA		DUF484 domain-containing protein	6	6	1	4	1169				707	707	707	81f6f292c45231c81cff920b572a826a_9072	d5a5a6aae91cabb186fe594057e8ea03_9509	ea50daa39c6c4a0574d509aa68b507b7_5913	4cb190364575d751463119e92857d019_9146	E_coli_7_04261	4840fb5d2d4897d217f65ba1ef1b22a7_337
ygjP		M48 family metallopeptidase	6	6	1	4	5941				503	503	503	81f6f292c45231c81cff920b572a826a_1262	d5a5a6aae91cabb186fe594057e8ea03_1259	ea50daa39c6c4a0574d509aa68b507b7_7419	4cb190364575d751463119e92857d019_1274	E_coli_7_03887	4840fb5d2d4897d217f65ba1ef1b22a7_1823
ulaB		PTS ascorbate transporter subunit IIB	6	6	1	4	1624				305	305	305	81f6f292c45231c81cff920b572a826a_8214	d5a5a6aae91cabb186fe594057e8ea03_8423	ea50daa39c6c4a0574d509aa68b507b7_4991	4cb190364575d751463119e92857d019_8290	E_coli_7_02181	4840fb5d2d4897d217f65ba1ef1b22a7_8660
nuoI		NADH-quinone oxidoreductase subunit NuoI	6	6	1	4	4152				542	542	542	81f6f292c45231c81cff920b572a826a_2957	d5a5a6aae91cabb186fe594057e8ea03_3038	ea50daa39c6c4a0574d509aa68b507b7_9196	4cb190364575d751463119e92857d019_2946	E_coli_7_00120	4840fb5d2d4897d217f65ba1ef1b22a7_3530
ghoS		type V toxin-antitoxin system endoribonuclease antitoxin GhoS	6	6	1	4	1559				296	296	296	81f6f292c45231c81cff920b572a826a_8354	d5a5a6aae91cabb186fe594057e8ea03_8726	ea50daa39c6c4a0574d509aa68b507b7_5131	4cb190364575d751463119e92857d019_8430	E_coli_7_02248	4840fb5d2d4897d217f65ba1ef1b22a7_8800
tnaA		tryptophanase	6	6	1	4	5179				1415	1415	1415	81f6f292c45231c81cff920b572a826a_9294	d5a5a6aae91cabb186fe594057e8ea03_9729	ea50daa39c6c4a0574d509aa68b507b7_6169	4cb190364575d751463119e92857d019_9368	E_coli_7_02954	4840fb5d2d4897d217f65ba1ef1b22a7_561
abrB		AbrB family transcriptional regulator	6	6	1	4	38				1046	1046	1046	81f6f292c45231c81cff920b572a826a_6206	d5a5a6aae91cabb186fe594057e8ea03_6552	ea50daa39c6c4a0574d509aa68b507b7_3172	4cb190364575d751463119e92857d019_6180	E_coli_7_03217	4840fb5d2d4897d217f65ba1ef1b22a7_6770
ccmC		heme exporter protein CcmC	6	6	1	4	4224				737	737	737	81f6f292c45231c81cff920b572a826a_3113	d5a5a6aae91cabb186fe594057e8ea03_3182	ea50daa39c6c4a0574d509aa68b507b7_9336	4cb190364575d751463119e92857d019_3086	E_coli_7_00189	4840fb5d2d4897d217f65ba1ef1b22a7_3672
WP_001195166.1		fimbria/pilus periplasmic chaperone	6	6	1	4	3240				710	710	710	81f6f292c45231c81cff920b572a826a_4650	d5a5a6aae91cabb186fe594057e8ea03_4803	ea50daa39c6c4a0574d509aa68b507b7_1522	4cb190364575d751463119e92857d019_4621	E_coli_7_00869	4840fb5d2d4897d217f65ba1ef1b22a7_5217
yahO		DUF1471 family periplasmic protein YahO	6	6	1	4	5889				275	275	275	81f6f292c45231c81cff920b572a826a_6924	d5a5a6aae91cabb186fe594057e8ea03_7289	ea50daa39c6c4a0574d509aa68b507b7_3858	4cb190364575d751463119e92857d019_6894	E_coli_7_04097	4840fb5d2d4897d217f65ba1ef1b22a7_7476
leuA		2-isopropylmalate synthase	6	6	1	4	491				1571	1571	1571	81f6f292c45231c81cff920b572a826a_7562	d5a5a6aae91cabb186fe594057e8ea03_7884	ea50daa39c6c4a0574d509aa68b507b7_4460	4cb190364575d751463119e92857d019_7490	E_coli_7_01144	4840fb5d2d4897d217f65ba1ef1b22a7_8130
tdcA		transcriptional regulator TdcA	6	6	1	4	5905				938	938	938	81f6f292c45231c81cff920b572a826a_1190	d5a5a6aae91cabb186fe594057e8ea03_1185	ea50daa39c6c4a0574d509aa68b507b7_7349	4cb190364575d751463119e92857d019_1202	E_coli_7_03852	4840fb5d2d4897d217f65ba1ef1b22a7_1751
dcuR		two-component system response regulator DcuR	6	6	1	4	1555				719	719	719	81f6f292c45231c81cff920b572a826a_8362	d5a5a6aae91cabb186fe594057e8ea03_8734	ea50daa39c6c4a0574d509aa68b507b7_5139	4cb190364575d751463119e92857d019_8438	E_coli_7_02252	4840fb5d2d4897d217f65ba1ef1b22a7_8808
nadB		L-aspartate oxidase	6	6	1	4	3839				1622	1622	1622	81f6f292c45231c81cff920b572a826a_2371	d5a5a6aae91cabb186fe594057e8ea03_2472	ea50daa39c6c4a0574d509aa68b507b7_8604	4cb190364575d751463119e92857d019_2375	E_coli_7_03400	4840fb5d2d4897d217f65ba1ef1b22a7_2930
hybC		hydrogenase 2 large subunit	6	6	1	4	6028				1703	1703	1703	81f6f292c45231c81cff920b572a826a_1432	d5a5a6aae91cabb186fe594057e8ea03_1525	ea50daa39c6c4a0574d509aa68b507b7_7589	4cb190364575d751463119e92857d019_1452	E_coli_7_03968	4840fb5d2d4897d217f65ba1ef1b22a7_1993
uspB		universal stress protein UspB	6	6	1	4	5028				335	335	335	81f6f292c45231c81cff920b572a826a_450	d5a5a6aae91cabb186fe594057e8ea03_457	ea50daa39c6c4a0574d509aa68b507b7_6637	4cb190364575d751463119e92857d019_448	E_coli_7_01797	4840fb5d2d4897d217f65ba1ef1b22a7_1033
iscS		cysteine desulfurase	6	6	1	4	3885				1214	1214	1214	81f6f292c45231c81cff920b572a826a_2463	d5a5a6aae91cabb186fe594057e8ea03_2564	ea50daa39c6c4a0574d509aa68b507b7_8696	4cb190364575d751463119e92857d019_2467	E_coli_7_03444	4840fb5d2d4897d217f65ba1ef1b22a7_3022
yihI		Der GTPase-activating protein YihI	6	6	1	4	2097				509	509	509	81f6f292c45231c81cff920b572a826a_8959	d5a5a6aae91cabb186fe594057e8ea03_9394	ea50daa39c6c4a0574d509aa68b507b7_5800	4cb190364575d751463119e92857d019_9033	E_coli_7_03984	4840fb5d2d4897d217f65ba1ef1b22a7_220
yfeR		LysR family transcriptional regulator	6	6	1	4	4022				926	926	926	81f6f292c45231c81cff920b572a826a_2699	d5a5a6aae91cabb186fe594057e8ea03_2798	ea50daa39c6c4a0574d509aa68b507b7_8964	4cb190364575d751463119e92857d019_2703	E_coli_7_04556	4840fb5d2d4897d217f65ba1ef1b22a7_3290
kdpC		K(+)-transporting ATPase subunit C	6	6	1	4	5329				572	572	572	81f6f292c45231c81cff920b572a826a_6270	d5a5a6aae91cabb186fe594057e8ea03_6590	ea50daa39c6c4a0574d509aa68b507b7_3210	4cb190364575d751463119e92857d019_6244	E_coli_7_01271	4840fb5d2d4897d217f65ba1ef1b22a7_6804
rluA		bifunctional tRNA pseudouridine(32) synthase/23S rRNA pseudouridine(746) synthase RluA	6	6	1	4	6089				659	659	659	81f6f292c45231c81cff920b572a826a_7597	d5a5a6aae91cabb186fe594057e8ea03_7919	ea50daa39c6c4a0574d509aa68b507b7_4495	4cb190364575d751463119e92857d019_7525	E_coli_7_01127	4840fb5d2d4897d217f65ba1ef1b22a7_8165
skp		molecular chaperone Skp	6	6	1	4	2546				485	485	485	81f6f292c45231c81cff920b572a826a_7354	d5a5a6aae91cabb186fe594057e8ea03_7671	ea50daa39c6c4a0574d509aa68b507b7_4252	4cb190364575d751463119e92857d019_7280	E_coli_7_01244	4840fb5d2d4897d217f65ba1ef1b22a7_7922
yhhQ		7-cyano-7-deazaguanine/7-aminomethyl-7-deazaguanine transporter	6	6	1	4	5005				665	665	665	81f6f292c45231c81cff920b572a826a_494	d5a5a6aae91cabb186fe594057e8ea03_501	ea50daa39c6c4a0574d509aa68b507b7_6679	4cb190364575d751463119e92857d019_492	E_coli_7_01777	4840fb5d2d4897d217f65ba1ef1b22a7_1077
WP_000170926.1		type I toxin-antitoxin system toxin Ldr family protein	6	6	1	4	4488				107	107	107	81f6f292c45231c81cff920b572a826a_5231	d5a5a6aae91cabb186fe594057e8ea03_5364	ea50daa39c6c4a0574d509aa68b507b7_2183	4cb190364575d751463119e92857d019_5204	E_coli_7_02084	4840fb5d2d4897d217f65ba1ef1b22a7_5772
mdtG		multidrug efflux MFS transporter MdtG	6	6	1	4	4343				1226	1226	1226	81f6f292c45231c81cff920b572a826a_5517	d5a5a6aae91cabb186fe594057e8ea03_5768	ea50daa39c6c4a0574d509aa68b507b7_2475	4cb190364575d751463119e92857d019_5494	E_coli_7_03847	4840fb5d2d4897d217f65ba1ef1b22a7_6062
hyaA		hydrogenase 1 small subunit	6	6	1	4	3511				1118	1118	1118	81f6f292c45231c81cff920b572a826a_5665	d5a5a6aae91cabb186fe594057e8ea03_6013	ea50daa39c6c4a0574d509aa68b507b7_2635	4cb190364575d751463119e92857d019_5639	E_coli_7_03072	4840fb5d2d4897d217f65ba1ef1b22a7_6230
lspA		signal peptidase II	6	6	1	4	445				494	494	494	81f6f292c45231c81cff920b572a826a_7657	d5a5a6aae91cabb186fe594057e8ea03_7977	ea50daa39c6c4a0574d509aa68b507b7_4543	4cb190364575d751463119e92857d019_7583	E_coli_7_01097	4840fb5d2d4897d217f65ba1ef1b22a7_8229
yacG		DNA gyrase inhibitor YacG	6	6	1	4	482				197	197	197	81f6f292c45231c81cff920b572a826a_7508	d5a5a6aae91cabb186fe594057e8ea03_7830	ea50daa39c6c4a0574d509aa68b507b7_4404	4cb190364575d751463119e92857d019_7436	E_coli_7_01168	4840fb5d2d4897d217f65ba1ef1b22a7_8076
chbB		PTS N,N'-diacetylchitobiose transporter subunit IIB	6	6	1	4	3011				320	320	320	81f6f292c45231c81cff920b572a826a_4224	d5a5a6aae91cabb186fe594057e8ea03_4270	ea50daa39c6c4a0574d509aa68b507b7_984	4cb190364575d751463119e92857d019_4065	E_coli_7_00662	4840fb5d2d4897d217f65ba1ef1b22a7_4673
ispU		(2E,6E)-farnesyl-diphosphate-specific ditrans,polycis-undecaprenyl-diphosphate synthase	6	6	1	4	2551				758	758	758	81f6f292c45231c81cff920b572a826a_7362	d5a5a6aae91cabb186fe594057e8ea03_7679	ea50daa39c6c4a0574d509aa68b507b7_4260	4cb190364575d751463119e92857d019_7288	E_coli_7_01239	4840fb5d2d4897d217f65ba1ef1b22a7_7930
ybfE		LexA regulated protein	6	6	1	4	5338				293	362	304	81f6f292c45231c81cff920b572a826a_6288	d5a5a6aae91cabb186fe594057e8ea03_6608	ea50daa39c6c4a0574d509aa68b507b7_3228	4cb190364575d751463119e92857d019_6262	E_coli_7_01280	4840fb5d2d4897d217f65ba1ef1b22a7_6822
panC		pantoate--beta-alanine ligase	6	6	1	4	2602				851	851	851	81f6f292c45231c81cff920b572a826a_7444	d5a5a6aae91cabb186fe594057e8ea03_7766	ea50daa39c6c4a0574d509aa68b507b7_4340	4cb190364575d751463119e92857d019_7372	E_coli_7_01199	4840fb5d2d4897d217f65ba1ef1b22a7_8012
[truncated: 4,981 more rows]

## Sheet: Column Info
Column	Column Name	Description
[truncated: 14 more rows]
