# Supplementary material for: Comparative De Novo and Pan-Genome Analysis of MDR Nosocomial Bacteria Isolated from Hospitals in Jeddah, Saudi Arabia
Source: MDPI journal article supplement (doi:10.3390/microorganisms11102432), 2023-09-28
Supplement: s1 [file Table S3 gene_presence of K. pneumoniae_3 _absence.xlsx]

## Sheet: Gene Presence Absence
Gene	Non-unique Gene name	Annotation	No. isolates	No. sequences	Avg sequences per isolate	Genome Fragment	Order within Fragment	Accessory Fragment	Accessory Order with Fragment	QC	Min group size nuc	Max group size nuc	Avg group size nuc	AP023148.1	CP054232.1	CP054972.1	CP062792.1	CP080362.1	K_pneumoniae_3
trxB		thioredoxin-disulfide reductase	6	6	1	1	876				965	995	972	9645baa8bb46fe9f9ffaa8fccfada4b3_6511	fb55d8fe7cfc5cfebfa700165fb94f7d_8970	7073f0826909e86605b7f24ba93c455b_6868	4d8fdf303c55f8e586b180af2243e275_6894	2900b96dbbdb35d877a57143d080ad95_7008	K_pneumoniae_3_00698
artP		arginine ABC transporter ATP-binding protein ArtP	6	6	1	1	852				728	794	739	9645baa8bb46fe9f9ffaa8fccfada4b3_6557	fb55d8fe7cfc5cfebfa700165fb94f7d_8919	7073f0826909e86605b7f24ba93c455b_6914	4d8fdf303c55f8e586b180af2243e275_6942	2900b96dbbdb35d877a57143d080ad95_7056	K_pneumoniae_3_00674
corC		CNNM family magnesium/cobalt transport protein CorC	6	6	1	1	3043				878	947	889	9645baa8bb46fe9f9ffaa8fccfada4b3_7032	fb55d8fe7cfc5cfebfa700165fb94f7d_8478	7073f0826909e86605b7f24ba93c455b_7371	4d8fdf303c55f8e586b180af2243e275_7393	2900b96dbbdb35d877a57143d080ad95_7513	K_pneumoniae_3_00460
rnpA		ribonuclease P protein component	6	6	1	1	8679				326	359	353	9645baa8bb46fe9f9ffaa8fccfada4b3_10092	fb55d8fe7cfc5cfebfa700165fb94f7d_5341	7073f0826909e86605b7f24ba93c455b_10310	4d8fdf303c55f8e586b180af2243e275_10586	2900b96dbbdb35d877a57143d080ad95_10636	K_pneumoniae_3_02326
rpsR		30S ribosomal protein S18	6	6	1	1	10640				227	227	227	9645baa8bb46fe9f9ffaa8fccfada4b3_9048	fb55d8fe7cfc5cfebfa700165fb94f7d_6629	7073f0826909e86605b7f24ba93c455b_9337	4d8fdf303c55f8e586b180af2243e275_9570	2900b96dbbdb35d877a57143d080ad95_9654	K_pneumoniae_3_04600
infA		translation initiation factor IF-1	6	6	1	1	872				218	218	218	9645baa8bb46fe9f9ffaa8fccfada4b3_6519	fb55d8fe7cfc5cfebfa700165fb94f7d_8962	7073f0826909e86605b7f24ba93c455b_6876	4d8fdf303c55f8e586b180af2243e275_6902	2900b96dbbdb35d877a57143d080ad95_7016	K_pneumoniae_3_00694
rpmB		50S ribosomal protein L28	6	6	1	1	9189				236	236	236	9645baa8bb46fe9f9ffaa8fccfada4b3_288	fb55d8fe7cfc5cfebfa700165fb94f7d_5045	7073f0826909e86605b7f24ba93c455b_273	4d8fdf303c55f8e586b180af2243e275_275	2900b96dbbdb35d877a57143d080ad95_285	K_pneumoniae_3_02456
fis		DNA-binding transcriptional regulator Fis	6	6	1	1	8121				296	296	296	9645baa8bb46fe9f9ffaa8fccfada4b3_929	fb55d8fe7cfc5cfebfa700165fb94f7d_4265	7073f0826909e86605b7f24ba93c455b_905	4d8fdf303c55f8e586b180af2243e275_916	2900b96dbbdb35d877a57143d080ad95_920	K_pneumoniae_3_01776
atpE		F0F1 ATP synthase subunit C	6	6	1	1	8725				239	239	239	9645baa8bb46fe9f9ffaa8fccfada4b3_10038	fb55d8fe7cfc5cfebfa700165fb94f7d_5409	7073f0826909e86605b7f24ba93c455b_10256	4d8fdf303c55f8e586b180af2243e275_10532	2900b96dbbdb35d877a57143d080ad95_10582	K_pneumoniae_3_02300
csrA		carbon storage regulator CsrA	6	6	1	1	2078				185	185	185	9645baa8bb46fe9f9ffaa8fccfada4b3_2201	fb55d8fe7cfc5cfebfa700165fb94f7d_2974	7073f0826909e86605b7f24ba93c455b_2313	4d8fdf303c55f8e586b180af2243e275_2347	2900b96dbbdb35d877a57143d080ad95_2173	K_pneumoniae_3_04227
rpoZ		DNA-directed RNA polymerase subunit omega	6	6	1	1	9225				275	275	275	9645baa8bb46fe9f9ffaa8fccfada4b3_231	fb55d8fe7cfc5cfebfa700165fb94f7d_5113	7073f0826909e86605b7f24ba93c455b_233	4d8fdf303c55f8e586b180af2243e275_233	2900b96dbbdb35d877a57143d080ad95_245	K_pneumoniae_3_02438
cspA		RNA chaperone/antiterminator CspA	6	6	1	1	11775				212	212	212	9645baa8bb46fe9f9ffaa8fccfada4b3_408	fb55d8fe7cfc5cfebfa700165fb94f7d_4883	7073f0826909e86605b7f24ba93c455b_395	4d8fdf303c55f8e586b180af2243e275_402	2900b96dbbdb35d877a57143d080ad95_407	K_pneumoniae_3_02523
rpsI		30S ribosomal protein S9	6	6	1	1	8164				392	392	392	9645baa8bb46fe9f9ffaa8fccfada4b3_1013	fb55d8fe7cfc5cfebfa700165fb94f7d_4189	7073f0826909e86605b7f24ba93c455b_989	4d8fdf303c55f8e586b180af2243e275_1000	2900b96dbbdb35d877a57143d080ad95_986	K_pneumoniae_3_01817
acpP		acyl carrier protein	6	6	1	1	1204				236	236	236	9645baa8bb46fe9f9ffaa8fccfada4b3_6175	fb55d8fe7cfc5cfebfa700165fb94f7d_9338	7073f0826909e86605b7f24ba93c455b_6498	4d8fdf303c55f8e586b180af2243e275_6545	2900b96dbbdb35d877a57143d080ad95_6676	K_pneumoniae_3_00868
rpsU		30S ribosomal protein S21	6	6	1	1	8569				215	215	215	9645baa8bb46fe9f9ffaa8fccfada4b3_1315	fb55d8fe7cfc5cfebfa700165fb94f7d_3879	7073f0826909e86605b7f24ba93c455b_1405	4d8fdf303c55f8e586b180af2243e275_1396	2900b96dbbdb35d877a57143d080ad95_1314	K_pneumoniae_3_01978
rplR		50S ribosomal protein L18	6	6	1	1	10515				353	353	353	9645baa8bb46fe9f9ffaa8fccfada4b3_854	fb55d8fe7cfc5cfebfa700165fb94f7d_4358	7073f0826909e86605b7f24ba93c455b_830	4d8fdf303c55f8e586b180af2243e275_835	2900b96dbbdb35d877a57143d080ad95_845	K_pneumoniae_3_02738
rplE		50S ribosomal protein L5	6	6	1	1	10519				539	539	539	9645baa8bb46fe9f9ffaa8fccfada4b3_846	fb55d8fe7cfc5cfebfa700165fb94f7d_4366	7073f0826909e86605b7f24ba93c455b_822	4d8fdf303c55f8e586b180af2243e275_827	2900b96dbbdb35d877a57143d080ad95_837	K_pneumoniae_3_02734
ompR		two-component system response regulator OmpR	6	6	1	1	10124				719	719	719	9645baa8bb46fe9f9ffaa8fccfada4b3_710	fb55d8fe7cfc5cfebfa700165fb94f7d_4554	7073f0826909e86605b7f24ba93c455b_686	4d8fdf303c55f8e586b180af2243e275_691	2900b96dbbdb35d877a57143d080ad95_701	K_pneumoniae_3_02666
ribE		6,7-dimethyl-8-ribityllumazine synthase	6	6	1	1	272				470	470	470	9645baa8bb46fe9f9ffaa8fccfada4b3_7715	fb55d8fe7cfc5cfebfa700165fb94f7d_8027	7073f0826909e86605b7f24ba93c455b_8019	4d8fdf303c55f8e586b180af2243e275_8195	2900b96dbbdb35d877a57143d080ad95_8348	K_pneumoniae_3_00146
rpmI		50S ribosomal protein L35	6	6	1	1	9740				197	197	197	9645baa8bb46fe9f9ffaa8fccfada4b3_3999	fb55d8fe7cfc5cfebfa700165fb94f7d_786	7073f0826909e86605b7f24ba93c455b_4052	4d8fdf303c55f8e586b180af2243e275_4389	2900b96dbbdb35d877a57143d080ad95_4315	K_pneumoniae_3_01028
nusG		transcription termination/antitermination protein NusG	6	6	1	1	10498				545	545	545	9645baa8bb46fe9f9ffaa8fccfada4b3_9535	fb55d8fe7cfc5cfebfa700165fb94f7d_5964	7073f0826909e86605b7f24ba93c455b_9807	4d8fdf303c55f8e586b180af2243e275_10039	2900b96dbbdb35d877a57143d080ad95_10125	K_pneumoniae_3_04928
rplT		50S ribosomal protein L20	6	6	1	1	9739				356	356	356	9645baa8bb46fe9f9ffaa8fccfada4b3_4001	fb55d8fe7cfc5cfebfa700165fb94f7d_784	7073f0826909e86605b7f24ba93c455b_4054	4d8fdf303c55f8e586b180af2243e275_4391	2900b96dbbdb35d877a57143d080ad95_4317	K_pneumoniae_3_01027
cspE		transcription antiterminator/RNA stability regulator CspE	6	6	1	1	6171				209	209	209	9645baa8bb46fe9f9ffaa8fccfada4b3_3652	fb55d8fe7cfc5cfebfa700165fb94f7d_1002	7073f0826909e86605b7f24ba93c455b_3705	4d8fdf303c55f8e586b180af2243e275_3909	2900b96dbbdb35d877a57143d080ad95_3823	K_pneumoniae_3_01177
rho		transcription termination factor Rho	6	6	1	1	10240				1259	1259	1259	9645baa8bb46fe9f9ffaa8fccfada4b3_9752	fb55d8fe7cfc5cfebfa700165fb94f7d_5506	7073f0826909e86605b7f24ba93c455b_9972	4d8fdf303c55f8e586b180af2243e275_10204	2900b96dbbdb35d877a57143d080ad95_10300	K_pneumoniae_3_04800
rplW		50S ribosomal protein L23	6	6	1	1	10530				302	302	302	9645baa8bb46fe9f9ffaa8fccfada4b3_826	fb55d8fe7cfc5cfebfa700165fb94f7d_4386	7073f0826909e86605b7f24ba93c455b_802	4d8fdf303c55f8e586b180af2243e275_807	2900b96dbbdb35d877a57143d080ad95_817	K_pneumoniae_3_02724
rplD		50S ribosomal protein L4	6	6	1	1	10531				605	605	605	9645baa8bb46fe9f9ffaa8fccfada4b3_824	fb55d8fe7cfc5cfebfa700165fb94f7d_4388	7073f0826909e86605b7f24ba93c455b_800	4d8fdf303c55f8e586b180af2243e275_805	2900b96dbbdb35d877a57143d080ad95_815	K_pneumoniae_3_02723
rpsC		30S ribosomal protein S3	6	6	1	1	10526				698	701	698	9645baa8bb46fe9f9ffaa8fccfada4b3_834	fb55d8fe7cfc5cfebfa700165fb94f7d_4378	7073f0826909e86605b7f24ba93c455b_810	4d8fdf303c55f8e586b180af2243e275_815	2900b96dbbdb35d877a57143d080ad95_825	K_pneumoniae_3_02728
rpoA		DNA-directed RNA polymerase subunit alpha	6	6	1	1	8038				989	989	989	9645baa8bb46fe9f9ffaa8fccfada4b3_872	fb55d8fe7cfc5cfebfa700165fb94f7d_4340	7073f0826909e86605b7f24ba93c455b_848	4d8fdf303c55f8e586b180af2243e275_853	2900b96dbbdb35d877a57143d080ad95_863	K_pneumoniae_3_02745
clpP		ATP-dependent Clp endopeptidase proteolytic subunit ClpP	6	6	1	1	294				623	623	623	9645baa8bb46fe9f9ffaa8fccfada4b3_7651	fb55d8fe7cfc5cfebfa700165fb94f7d_8071	7073f0826909e86605b7f24ba93c455b_7955	4d8fdf303c55f8e586b180af2243e275_8131	2900b96dbbdb35d877a57143d080ad95_8284	K_pneumoniae_3_00178
WP_002892173.1		YbaB/EbfC family nucleoid-associated protein	6	6	1	1	335				329	332	331	9645baa8bb46fe9f9ffaa8fccfada4b3_7537	fb55d8fe7cfc5cfebfa700165fb94f7d_8141	7073f0826909e86605b7f24ba93c455b_7841	4d8fdf303c55f8e586b180af2243e275_8017	2900b96dbbdb35d877a57143d080ad95_8170	K_pneumoniae_3_00232
lrp		leucine-responsive transcriptional regulator Lrp	6	6	1	1	877				494	494	494	9645baa8bb46fe9f9ffaa8fccfada4b3_6509	fb55d8fe7cfc5cfebfa700165fb94f7d_8972	7073f0826909e86605b7f24ba93c455b_6866	4d8fdf303c55f8e586b180af2243e275_6892	2900b96dbbdb35d877a57143d080ad95_7006	K_pneumoniae_3_00699
uspA		universal stress protein UspA	6	6	1	1	11604				434	437	436	9645baa8bb46fe9f9ffaa8fccfada4b3_536	fb55d8fe7cfc5cfebfa700165fb94f7d_4736	7073f0826909e86605b7f24ba93c455b_517	4d8fdf303c55f8e586b180af2243e275_521	2900b96dbbdb35d877a57143d080ad95_529	K_pneumoniae_3_02581
crp		cAMP-activated global transcriptional regulator CRP	6	6	1	1	10575				632	632	632	9645baa8bb46fe9f9ffaa8fccfada4b3_774	fb55d8fe7cfc5cfebfa700165fb94f7d_4466	7073f0826909e86605b7f24ba93c455b_750	4d8fdf303c55f8e586b180af2243e275_755	2900b96dbbdb35d877a57143d080ad95_765	K_pneumoniae_3_02698
glyQ		glycine--tRNA ligase subunit alpha	6	6	1	1	11781				911	911	911	9645baa8bb46fe9f9ffaa8fccfada4b3_400	fb55d8fe7cfc5cfebfa700165fb94f7d_4891	7073f0826909e86605b7f24ba93c455b_387	4d8fdf303c55f8e586b180af2243e275_389	2900b96dbbdb35d877a57143d080ad95_399	K_pneumoniae_3_02519
rpsH		30S ribosomal protein S8	6	6	1	1	10517				392	392	392	9645baa8bb46fe9f9ffaa8fccfada4b3_850	fb55d8fe7cfc5cfebfa700165fb94f7d_4362	7073f0826909e86605b7f24ba93c455b_826	4d8fdf303c55f8e586b180af2243e275_831	2900b96dbbdb35d877a57143d080ad95_841	K_pneumoniae_3_02736
glnB		nitrogen regulatory protein P-II	6	6	1	1	3657				338	338	338	9645baa8bb46fe9f9ffaa8fccfada4b3_2511	fb55d8fe7cfc5cfebfa700165fb94f7d_2745	7073f0826909e86605b7f24ba93c455b_2588	4d8fdf303c55f8e586b180af2243e275_2652	2900b96dbbdb35d877a57143d080ad95_2458	K_pneumoniae_3_01735
rplQ		50S ribosomal protein L17	6	6	1	1	8039				383	386	385	9645baa8bb46fe9f9ffaa8fccfada4b3_874	fb55d8fe7cfc5cfebfa700165fb94f7d_4338	7073f0826909e86605b7f24ba93c455b_850	4d8fdf303c55f8e586b180af2243e275_855	2900b96dbbdb35d877a57143d080ad95_865	K_pneumoniae_3_02746
rplX		50S ribosomal protein L24	6	6	1	1	10520				314	314	314	9645baa8bb46fe9f9ffaa8fccfada4b3_844	fb55d8fe7cfc5cfebfa700165fb94f7d_4368	7073f0826909e86605b7f24ba93c455b_820	4d8fdf303c55f8e586b180af2243e275_825	2900b96dbbdb35d877a57143d080ad95_835	K_pneumoniae_3_02733
mreB		rod shape-determining protein MreB	6	6	1	1	8134				1043	1043	1043	9645baa8bb46fe9f9ffaa8fccfada4b3_953	fb55d8fe7cfc5cfebfa700165fb94f7d_4229	7073f0826909e86605b7f24ba93c455b_929	4d8fdf303c55f8e586b180af2243e275_940	2900b96dbbdb35d877a57143d080ad95_944	K_pneumoniae_3_01787
rpsL		30S ribosomal protein S12	6	6	1	1	10549				374	374	374	9645baa8bb46fe9f9ffaa8fccfada4b3_806	fb55d8fe7cfc5cfebfa700165fb94f7d_4434	7073f0826909e86605b7f24ba93c455b_782	4d8fdf303c55f8e586b180af2243e275_787	2900b96dbbdb35d877a57143d080ad95_797	K_pneumoniae_3_02714
rplK		50S ribosomal protein L11	6	6	1	1	10497				428	428	428	9645baa8bb46fe9f9ffaa8fccfada4b3_9533	fb55d8fe7cfc5cfebfa700165fb94f7d_5966	7073f0826909e86605b7f24ba93c455b_9805	4d8fdf303c55f8e586b180af2243e275_10037	2900b96dbbdb35d877a57143d080ad95_10123	K_pneumoniae_3_04929
rpsB		30S ribosomal protein S2	6	6	1	1	7357				725	725	725	9645baa8bb46fe9f9ffaa8fccfada4b3_8113	fb55d8fe7cfc5cfebfa700165fb94f7d_7540	7073f0826909e86605b7f24ba93c455b_8423	4d8fdf303c55f8e586b180af2243e275_8601	2900b96dbbdb35d877a57143d080ad95_8762	K_pneumoniae_3_03194
ihfA		integration host factor subunit alpha	6	6	1	1	3967				299	299	299	9645baa8bb46fe9f9ffaa8fccfada4b3_4010	fb55d8fe7cfc5cfebfa700165fb94f7d_775	7073f0826909e86605b7f24ba93c455b_4063	4d8fdf303c55f8e586b180af2243e275_4400	2900b96dbbdb35d877a57143d080ad95_4326	K_pneumoniae_3_01024
rplB		50S ribosomal protein L2	6	6	1	1	10529				821	821	821	9645baa8bb46fe9f9ffaa8fccfada4b3_828	fb55d8fe7cfc5cfebfa700165fb94f7d_4384	7073f0826909e86605b7f24ba93c455b_804	4d8fdf303c55f8e586b180af2243e275_809	2900b96dbbdb35d877a57143d080ad95_819	K_pneumoniae_3_02725
ptsH		phosphocarrier protein Hpr	6	6	1	1	3853				257	257	257	9645baa8bb46fe9f9ffaa8fccfada4b3_2747	fb55d8fe7cfc5cfebfa700165fb94f7d_2513	7073f0826909e86605b7f24ba93c455b_2824	4d8fdf303c55f8e586b180af2243e275_2916	2900b96dbbdb35d877a57143d080ad95_2690	K_pneumoniae_3_01621
ftsA		cell division protein FtsA	6	6	1	1	3437				1262	1262	1262	9645baa8bb46fe9f9ffaa8fccfada4b3_8291	fb55d8fe7cfc5cfebfa700165fb94f7d_7331	7073f0826909e86605b7f24ba93c455b_8601	4d8fdf303c55f8e586b180af2243e275_8779	2900b96dbbdb35d877a57143d080ad95_8942	K_pneumoniae_3_03278
ftsZ		cell division protein FtsZ	6	6	1	1	3436				1151	1151	1151	9645baa8bb46fe9f9ffaa8fccfada4b3_8289	fb55d8fe7cfc5cfebfa700165fb94f7d_7333	7073f0826909e86605b7f24ba93c455b_8599	4d8fdf303c55f8e586b180af2243e275_8777	2900b96dbbdb35d877a57143d080ad95_8940	K_pneumoniae_3_03277
rpsS		30S ribosomal protein S19	6	6	1	1	10528				278	278	278	9645baa8bb46fe9f9ffaa8fccfada4b3_830	fb55d8fe7cfc5cfebfa700165fb94f7d_4382	7073f0826909e86605b7f24ba93c455b_806	4d8fdf303c55f8e586b180af2243e275_811	2900b96dbbdb35d877a57143d080ad95_821	K_pneumoniae_3_02726
dksA		RNA polymerase-binding protein DksA	6	6	1	1	3363				455	455	455	9645baa8bb46fe9f9ffaa8fccfada4b3_8193	fb55d8fe7cfc5cfebfa700165fb94f7d_7484	7073f0826909e86605b7f24ba93c455b_8503	4d8fdf303c55f8e586b180af2243e275_8681	2900b96dbbdb35d877a57143d080ad95_8842	K_pneumoniae_3_03231
rpsA		30S ribosomal protein S1	6	6	1	1	902				1673	1673	1673	9645baa8bb46fe9f9ffaa8fccfada4b3_6475	fb55d8fe7cfc5cfebfa700165fb94f7d_9010	7073f0826909e86605b7f24ba93c455b_6832	4d8fdf303c55f8e586b180af2243e275_6858	2900b96dbbdb35d877a57143d080ad95_6972	K_pneumoniae_3_00716
sdhA		succinate dehydrogenase flavoprotein subunit	6	6	1	1	2966				1766	1766	1766	9645baa8bb46fe9f9ffaa8fccfada4b3_6925	fb55d8fe7cfc5cfebfa700165fb94f7d_8625	7073f0826909e86605b7f24ba93c455b_7264	4d8fdf303c55f8e586b180af2243e275_7286	2900b96dbbdb35d877a57143d080ad95_7406	K_pneumoniae_3_00509
rpoS		RNA polymerase sigma factor RpoS	6	6	1	1	11238				992	992	992	9645baa8bb46fe9f9ffaa8fccfada4b3_2049	fb55d8fe7cfc5cfebfa700165fb94f7d_3072	7073f0826909e86605b7f24ba93c455b_2161	4d8fdf303c55f8e586b180af2243e275_2173	2900b96dbbdb35d877a57143d080ad95_2021	K_pneumoniae_3_04301
WP_002886707.1		DUF1107 domain-containing protein	6	6	1	1	10627				206	206	206	9645baa8bb46fe9f9ffaa8fccfada4b3_9022	fb55d8fe7cfc5cfebfa700165fb94f7d_6665	7073f0826909e86605b7f24ba93c455b_9311	4d8fdf303c55f8e586b180af2243e275_9544	2900b96dbbdb35d877a57143d080ad95_9628	K_pneumoniae_3_04587
group_11815	cspE	transcription antiterminator/RNA stability regulator CspE	6	6	1	1	3075				209	209	209	9645baa8bb46fe9f9ffaa8fccfada4b3_7086	fb55d8fe7cfc5cfebfa700165fb94f7d_8414	7073f0826909e86605b7f24ba93c455b_7425	4d8fdf303c55f8e586b180af2243e275_7447	2900b96dbbdb35d877a57143d080ad95_7567	K_pneumoniae_3_00433
rplC		50S ribosomal protein L3	6	6	1	1	10532				629	629	629	9645baa8bb46fe9f9ffaa8fccfada4b3_822	fb55d8fe7cfc5cfebfa700165fb94f7d_4390	7073f0826909e86605b7f24ba93c455b_798	4d8fdf303c55f8e586b180af2243e275_803	2900b96dbbdb35d877a57143d080ad95_813	K_pneumoniae_3_02722
ahpC		alkyl hydroperoxide reductase subunit C	6	6	1	1	3096				563	563	563	9645baa8bb46fe9f9ffaa8fccfada4b3_7100	fb55d8fe7cfc5cfebfa700165fb94f7d_8382	7073f0826909e86605b7f24ba93c455b_7439	4d8fdf303c55f8e586b180af2243e275_7461	2900b96dbbdb35d877a57143d080ad95_7581	K_pneumoniae_3_00426
rplN		50S ribosomal protein L14	6	6	1	1	10521				371	371	371	9645baa8bb46fe9f9ffaa8fccfada4b3_842	fb55d8fe7cfc5cfebfa700165fb94f7d_4370	7073f0826909e86605b7f24ba93c455b_818	4d8fdf303c55f8e586b180af2243e275_823	2900b96dbbdb35d877a57143d080ad95_833	K_pneumoniae_3_02732
atpD		F0F1 ATP synthase subunit beta	6	6	1	1	8720				1382	1382	1382	9645baa8bb46fe9f9ffaa8fccfada4b3_10048	fb55d8fe7cfc5cfebfa700165fb94f7d_5399	7073f0826909e86605b7f24ba93c455b_10266	4d8fdf303c55f8e586b180af2243e275_10542	2900b96dbbdb35d877a57143d080ad95_10592	K_pneumoniae_3_02305
rpoB		DNA-directed RNA polymerase subunit beta	6	6	1	1	7711				4028	4028	4028	9645baa8bb46fe9f9ffaa8fccfada4b3_9525	fb55d8fe7cfc5cfebfa700165fb94f7d_5974	7073f0826909e86605b7f24ba93c455b_9797	4d8fdf303c55f8e586b180af2243e275_10029	2900b96dbbdb35d877a57143d080ad95_10115	K_pneumoniae_3_04933
ilvC		ketol-acid reductoisomerase	6	6	1	1	10232				1475	1475	1475	9645baa8bb46fe9f9ffaa8fccfada4b3_9772	fb55d8fe7cfc5cfebfa700165fb94f7d_5492	7073f0826909e86605b7f24ba93c455b_9992	4d8fdf303c55f8e586b180af2243e275_10224	2900b96dbbdb35d877a57143d080ad95_10320	K_pneumoniae_3_04790
nuoI		NADH-quinone oxidoreductase subunit NuoI	6	6	1	1	4934				542	542	542	9645baa8bb46fe9f9ffaa8fccfada4b3_2957	fb55d8fe7cfc5cfebfa700165fb94f7d_2248	7073f0826909e86605b7f24ba93c455b_3024	4d8fdf303c55f8e586b180af2243e275_3116	2900b96dbbdb35d877a57143d080ad95_3007	K_pneumoniae_3_01506
ispG		flavodoxin-dependent (E)-4-hydroxy-3-methylbut-2-enyl-diphosphate synthase	6	6	1	1	3706				1118	1121	1120	9645baa8bb46fe9f9ffaa8fccfada4b3_2575	fb55d8fe7cfc5cfebfa700165fb94f7d_2679	7073f0826909e86605b7f24ba93c455b_2652	4d8fdf303c55f8e586b180af2243e275_2716	2900b96dbbdb35d877a57143d080ad95_2522	K_pneumoniae_3_01703
secY		preprotein translocase subunit SecY	6	6	1	1	10511				1331	1331	1331	9645baa8bb46fe9f9ffaa8fccfada4b3_862	fb55d8fe7cfc5cfebfa700165fb94f7d_4350	7073f0826909e86605b7f24ba93c455b_838	4d8fdf303c55f8e586b180af2243e275_843	2900b96dbbdb35d877a57143d080ad95_853	K_pneumoniae_3_02742
efp		elongation factor P	6	6	1	1	10744				566	566	566	9645baa8bb46fe9f9ffaa8fccfada4b3_9153	fb55d8fe7cfc5cfebfa700165fb94f7d_6502	7073f0826909e86605b7f24ba93c455b_9442	4d8fdf303c55f8e586b180af2243e275_9675	2900b96dbbdb35d877a57143d080ad95_9759	K_pneumoniae_3_04651
ispF		2-C-methyl-D-erythritol 2,4-cyclodiphosphate synthase	6	6	1	1	11248				479	479	479	9645baa8bb46fe9f9ffaa8fccfada4b3_2039	fb55d8fe7cfc5cfebfa700165fb94f7d_3082	7073f0826909e86605b7f24ba93c455b_2151	4d8fdf303c55f8e586b180af2243e275_2163	2900b96dbbdb35d877a57143d080ad95_2011	K_pneumoniae_3_04306
crr		PTS glucose transporter subunit IIA	6	6	1	1	3851				509	509	509	9645baa8bb46fe9f9ffaa8fccfada4b3_2743	fb55d8fe7cfc5cfebfa700165fb94f7d_2517	7073f0826909e86605b7f24ba93c455b_2820	4d8fdf303c55f8e586b180af2243e275_2912	2900b96dbbdb35d877a57143d080ad95_2686	K_pneumoniae_3_01623
nuoB		NADH-quinone oxidoreductase subunit NuoB	6	6	1	1	4928				662	674	672	9645baa8bb46fe9f9ffaa8fccfada4b3_2945	fb55d8fe7cfc5cfebfa700165fb94f7d_2260	7073f0826909e86605b7f24ba93c455b_3012	4d8fdf303c55f8e586b180af2243e275_3104	2900b96dbbdb35d877a57143d080ad95_2995	K_pneumoniae_3_01512
atpA		F0F1 ATP synthase subunit alpha	6	6	1	1	8722				1541	1541	1541	9645baa8bb46fe9f9ffaa8fccfada4b3_10044	fb55d8fe7cfc5cfebfa700165fb94f7d_5403	7073f0826909e86605b7f24ba93c455b_10262	4d8fdf303c55f8e586b180af2243e275_10538	2900b96dbbdb35d877a57143d080ad95_10588	K_pneumoniae_3_02303
speB		agmatinase	6	6	1	1	10786				920	920	920	9645baa8bb46fe9f9ffaa8fccfada4b3_1511	fb55d8fe7cfc5cfebfa700165fb94f7d_3502	7073f0826909e86605b7f24ba93c455b_1617	4d8fdf303c55f8e586b180af2243e275_1602	2900b96dbbdb35d877a57143d080ad95_1516	K_pneumoniae_3_02076
yeaG		protein kinase YeaG	6	6	1	1	7114				1934	1934	1934	9645baa8bb46fe9f9ffaa8fccfada4b3_5942	fb55d8fe7cfc5cfebfa700165fb94f7d_924	7073f0826909e86605b7f24ba93c455b_6130	4d8fdf303c55f8e586b180af2243e275_6275	2900b96dbbdb35d877a57143d080ad95_6264	K_pneumoniae_3_02999
pyrH		UMP kinase	6	6	1	1	7359				725	725	725	9645baa8bb46fe9f9ffaa8fccfada4b3_8109	fb55d8fe7cfc5cfebfa700165fb94f7d_7544	7073f0826909e86605b7f24ba93c455b_8419	4d8fdf303c55f8e586b180af2243e275_8597	2900b96dbbdb35d877a57143d080ad95_8758	K_pneumoniae_3_03192
rpsN		30S ribosomal protein S14	6	6	1	1	10518				305	305	305	9645baa8bb46fe9f9ffaa8fccfada4b3_848	fb55d8fe7cfc5cfebfa700165fb94f7d_4364	7073f0826909e86605b7f24ba93c455b_824	4d8fdf303c55f8e586b180af2243e275_829	2900b96dbbdb35d877a57143d080ad95_839	K_pneumoniae_3_02735
rpsG		30S ribosomal protein S7	6	6	1	1	10548				470	470	470	9645baa8bb46fe9f9ffaa8fccfada4b3_808	fb55d8fe7cfc5cfebfa700165fb94f7d_4432	7073f0826909e86605b7f24ba93c455b_784	4d8fdf303c55f8e586b180af2243e275_789	2900b96dbbdb35d877a57143d080ad95_799	K_pneumoniae_3_02715
rpmF		50S ribosomal protein L32	6	6	1	1	1197				173	173	173	9645baa8bb46fe9f9ffaa8fccfada4b3_6185	fb55d8fe7cfc5cfebfa700165fb94f7d_9328	7073f0826909e86605b7f24ba93c455b_6508	4d8fdf303c55f8e586b180af2243e275_6555	2900b96dbbdb35d877a57143d080ad95_6686	K_pneumoniae_3_00863
pstB		phosphate ABC transporter ATP-binding protein PstB	6	6	1	1	8713				773	773	773	9645baa8bb46fe9f9ffaa8fccfada4b3_10062	fb55d8fe7cfc5cfebfa700165fb94f7d_5385	7073f0826909e86605b7f24ba93c455b_10280	4d8fdf303c55f8e586b180af2243e275_10556	2900b96dbbdb35d877a57143d080ad95_10606	K_pneumoniae_3_02312
rplF		50S ribosomal protein L6	6	6	1	1	10516				533	533	533	9645baa8bb46fe9f9ffaa8fccfada4b3_852	fb55d8fe7cfc5cfebfa700165fb94f7d_4360	7073f0826909e86605b7f24ba93c455b_828	4d8fdf303c55f8e586b180af2243e275_833	2900b96dbbdb35d877a57143d080ad95_843	K_pneumoniae_3_02737
rplA		50S ribosomal protein L1	6	6	1	1	10496				704	704	704	9645baa8bb46fe9f9ffaa8fccfada4b3_9531	fb55d8fe7cfc5cfebfa700165fb94f7d_5968	7073f0826909e86605b7f24ba93c455b_9803	4d8fdf303c55f8e586b180af2243e275_10035	2900b96dbbdb35d877a57143d080ad95_10121	K_pneumoniae_3_04930
fabA		bifunctional 3-hydroxydecanoyl-ACP dehydratase/trans-2-decenoyl-ACP isomerase	6	6	1	1	975				518	518	518	9645baa8bb46fe9f9ffaa8fccfada4b3_6393	fb55d8fe7cfc5cfebfa700165fb94f7d_9082	7073f0826909e86605b7f24ba93c455b_6750	4d8fdf303c55f8e586b180af2243e275_6776	2900b96dbbdb35d877a57143d080ad95_6890	K_pneumoniae_3_00757
clpX		ATP-dependent protease ATP-binding subunit ClpX	6	6	1	1	295				1274	1274	1274	9645baa8bb46fe9f9ffaa8fccfada4b3_7649	fb55d8fe7cfc5cfebfa700165fb94f7d_8073	7073f0826909e86605b7f24ba93c455b_7953	4d8fdf303c55f8e586b180af2243e275_8129	2900b96dbbdb35d877a57143d080ad95_8282	K_pneumoniae_3_00179
dnaB		replicative DNA helicase	6	6	1	1	7808				1415	1415	1415	9645baa8bb46fe9f9ffaa8fccfada4b3_9370	fb55d8fe7cfc5cfebfa700165fb94f7d_6128	7073f0826909e86605b7f24ba93c455b_9655	4d8fdf303c55f8e586b180af2243e275_9888	2900b96dbbdb35d877a57143d080ad95_9974	K_pneumoniae_3_04500
lon		endopeptidase La	6	6	1	1	296				2354	2354	2354	9645baa8bb46fe9f9ffaa8fccfada4b3_7647	fb55d8fe7cfc5cfebfa700165fb94f7d_8075	7073f0826909e86605b7f24ba93c455b_7951	4d8fdf303c55f8e586b180af2243e275_8127	2900b96dbbdb35d877a57143d080ad95_8280	K_pneumoniae_3_00180
rplJ		50S ribosomal protein L10	6	6	1	1	7709				497	497	497	9645baa8bb46fe9f9ffaa8fccfada4b3_9529	fb55d8fe7cfc5cfebfa700165fb94f7d_5970	7073f0826909e86605b7f24ba93c455b_9801	4d8fdf303c55f8e586b180af2243e275_10033	2900b96dbbdb35d877a57143d080ad95_10119	K_pneumoniae_3_04931
rpsD		30S ribosomal protein S4	6	6	1	1	8037				620	620	620	9645baa8bb46fe9f9ffaa8fccfada4b3_870	fb55d8fe7cfc5cfebfa700165fb94f7d_4342	7073f0826909e86605b7f24ba93c455b_846	4d8fdf303c55f8e586b180af2243e275_851	2900b96dbbdb35d877a57143d080ad95_861	K_pneumoniae_3_02744
rplS		50S ribosomal protein L19	6	6	1	1	2128				347	347	347	9645baa8bb46fe9f9ffaa8fccfada4b3_2400	fb55d8fe7cfc5cfebfa700165fb94f7d_2862	7073f0826909e86605b7f24ba93c455b_2479	4d8fdf303c55f8e586b180af2243e275_2543	2900b96dbbdb35d877a57143d080ad95_2349	K_pneumoniae_3_04150
rpsJ		30S ribosomal protein S10	6	6	1	1	10541				311	311	311	9645baa8bb46fe9f9ffaa8fccfada4b3_820	fb55d8fe7cfc5cfebfa700165fb94f7d_4392	7073f0826909e86605b7f24ba93c455b_796	4d8fdf303c55f8e586b180af2243e275_801	2900b96dbbdb35d877a57143d080ad95_811	K_pneumoniae_3_02721
WP_001235713.1		recombinase family protein	6	7	1.17	1	9731				317	557	491	9645baa8bb46fe9f9ffaa8fccfada4b3_10486	fb55d8fe7cfc5cfebfa700165fb94f7d_10020	7073f0826909e86605b7f24ba93c455b_10465	4d8fdf303c55f8e586b180af2243e275_10617 4d8fdf303c55f8e586b180af2243e275_10900	2900b96dbbdb35d877a57143d080ad95_10896	K_pneumoniae_3_05137
ftsK		DNA translocase FtsK	6	6	1	1	878				4106	4253	4199	9645baa8bb46fe9f9ffaa8fccfada4b3_6507	fb55d8fe7cfc5cfebfa700165fb94f7d_8974	7073f0826909e86605b7f24ba93c455b_6864	4d8fdf303c55f8e586b180af2243e275_6890	2900b96dbbdb35d877a57143d080ad95_7004	K_pneumoniae_3_00700
dnaN		DNA polymerase III subunit beta	6	6	1	1	6670				1100	1100	1100	9645baa8bb46fe9f9ffaa8fccfada4b3_5	fb55d8fe7cfc5cfebfa700165fb94f7d_5333	7073f0826909e86605b7f24ba93c455b_5	4d8fdf303c55f8e586b180af2243e275_5	2900b96dbbdb35d877a57143d080ad95_5	K_pneumoniae_3_02328
ibpA		heat shock chaperone IbpA	6	6	1	1	6691				413	413	413	9645baa8bb46fe9f9ffaa8fccfada4b3_32	fb55d8fe7cfc5cfebfa700165fb94f7d_5304	7073f0826909e86605b7f24ba93c455b_32	4d8fdf303c55f8e586b180af2243e275_32	2900b96dbbdb35d877a57143d080ad95_32	K_pneumoniae_3_02341
uhpT		hexose-6-phosphate:phosphate antiporter	6	6	1	1	6858				1391	1391	1391	9645baa8bb46fe9f9ffaa8fccfada4b3_80	fb55d8fe7cfc5cfebfa700165fb94f7d_5266	7073f0826909e86605b7f24ba93c455b_82	4d8fdf303c55f8e586b180af2243e275_82	2900b96dbbdb35d877a57143d080ad95_82	K_pneumoniae_3_02364
spoT		bifunctional GTP diphosphokinase/guanosine-3',5'-bis pyrophosphate 3'-pyrophosphohydrolase	6	6	1	1	9251				2108	2120	2118	9645baa8bb46fe9f9ffaa8fccfada4b3_229	fb55d8fe7cfc5cfebfa700165fb94f7d_5115	7073f0826909e86605b7f24ba93c455b_231	4d8fdf303c55f8e586b180af2243e275_231	2900b96dbbdb35d877a57143d080ad95_243	K_pneumoniae_3_02437
rph		ribonuclease PH	6	6	1	1	9197				716	716	716	9645baa8bb46fe9f9ffaa8fccfada4b3_276	fb55d8fe7cfc5cfebfa700165fb94f7d_5057	7073f0826909e86605b7f24ba93c455b_259	4d8fdf303c55f8e586b180af2243e275_263	2900b96dbbdb35d877a57143d080ad95_271	K_pneumoniae_3_02450
slmA		nucleoid occlusion factor SlmA	6	6	1	1	9194				596	596	596	9645baa8bb46fe9f9ffaa8fccfada4b3_280	fb55d8fe7cfc5cfebfa700165fb94f7d_5053	7073f0826909e86605b7f24ba93c455b_265	4d8fdf303c55f8e586b180af2243e275_267	2900b96dbbdb35d877a57143d080ad95_277	K_pneumoniae_3_02452
rpmG		50S ribosomal protein L33	6	6	1	1	9185				167	167	167	9645baa8bb46fe9f9ffaa8fccfada4b3_290	fb55d8fe7cfc5cfebfa700165fb94f7d_5043	7073f0826909e86605b7f24ba93c455b_275	4d8fdf303c55f8e586b180af2243e275_277	2900b96dbbdb35d877a57143d080ad95_287	K_pneumoniae_3_02457
rfaD		ADP-glyceromanno-heptose 6-epimerase	6	6	1	1	9168				932	932	932	9645baa8bb46fe9f9ffaa8fccfada4b3_320	fb55d8fe7cfc5cfebfa700165fb94f7d_5009	7073f0826909e86605b7f24ba93c455b_305	4d8fdf303c55f8e586b180af2243e275_307	2900b96dbbdb35d877a57143d080ad95_317	K_pneumoniae_3_02472
tdh		L-threonine 3-dehydrogenase	6	6	1	1	9166				1025	1025	1025	9645baa8bb46fe9f9ffaa8fccfada4b3_324	fb55d8fe7cfc5cfebfa700165fb94f7d_5005	7073f0826909e86605b7f24ba93c455b_309	4d8fdf303c55f8e586b180af2243e275_311	2900b96dbbdb35d877a57143d080ad95_321	K_pneumoniae_3_02474
cysE		serine O-acetyltransferase	6	6	1	1	19				821	821	821	9645baa8bb46fe9f9ffaa8fccfada4b3_342	fb55d8fe7cfc5cfebfa700165fb94f7d_4987	7073f0826909e86605b7f24ba93c455b_327	4d8fdf303c55f8e586b180af2243e275_329	2900b96dbbdb35d877a57143d080ad95_339	K_pneumoniae_3_02483
dppF		dipeptide ABC transporter ATP-binding subunit DppF	6	6	1	1	11759				1004	1013	1011	9645baa8bb46fe9f9ffaa8fccfada4b3_462	fb55d8fe7cfc5cfebfa700165fb94f7d_4848	7073f0826909e86605b7f24ba93c455b_443	4d8fdf303c55f8e586b180af2243e275_447	2900b96dbbdb35d877a57143d080ad95_455	K_pneumoniae_3_02545
rsmJ		16S rRNA (guanine(1516)-N(2))-methyltransferase RsmJ	6	6	1	1	11640				752	752	752	9645baa8bb46fe9f9ffaa8fccfada4b3_532	fb55d8fe7cfc5cfebfa700165fb94f7d_4742	7073f0826909e86605b7f24ba93c455b_513	4d8fdf303c55f8e586b180af2243e275_517	2900b96dbbdb35d877a57143d080ad95_525	K_pneumoniae_3_02579
uspB		universal stress protein UspB	6	6	1	1	11603				335	335	335	9645baa8bb46fe9f9ffaa8fccfada4b3_538	fb55d8fe7cfc5cfebfa700165fb94f7d_4734	7073f0826909e86605b7f24ba93c455b_519	4d8fdf303c55f8e586b180af2243e275_523	2900b96dbbdb35d877a57143d080ad95_531	K_pneumoniae_3_02582
rpoH		RNA polymerase sigma factor RpoH	6	6	1	1	11565				854	854	854	9645baa8bb46fe9f9ffaa8fccfada4b3_604	fb55d8fe7cfc5cfebfa700165fb94f7d_4664	7073f0826909e86605b7f24ba93c455b_584	4d8fdf303c55f8e586b180af2243e275_589	2900b96dbbdb35d877a57143d080ad95_595	K_pneumoniae_3_02614
livJ		branched chain amino acid ABC transporter substrate-binding protein LivJ	6	6	1	1	11564				1097	1103	1102	9645baa8bb46fe9f9ffaa8fccfada4b3_612	fb55d8fe7cfc5cfebfa700165fb94f7d_4662	7073f0826909e86605b7f24ba93c455b_592	4d8fdf303c55f8e586b180af2243e275_597	2900b96dbbdb35d877a57143d080ad95_603	K_pneumoniae_3_02618
livH		high-affinity branched-chain amino acid ABC transporter permease LivH	6	6	1	1	11561				926	926	926	9645baa8bb46fe9f9ffaa8fccfada4b3_618	fb55d8fe7cfc5cfebfa700165fb94f7d_4652	7073f0826909e86605b7f24ba93c455b_598	4d8fdf303c55f8e586b180af2243e275_603	2900b96dbbdb35d877a57143d080ad95_609	K_pneumoniae_3_02621
livG		high-affinity branched-chain amino acid ABC transporter ATP-binding protein LivG	6	6	1	1	11558				767	767	767	9645baa8bb46fe9f9ffaa8fccfada4b3_622	fb55d8fe7cfc5cfebfa700165fb94f7d_4648	7073f0826909e86605b7f24ba93c455b_602	4d8fdf303c55f8e586b180af2243e275_607	2900b96dbbdb35d877a57143d080ad95_613	K_pneumoniae_3_02623
nfuA		Fe-S biogenesis protein NfuA	6	6	1	1	10115				575	575	575	9645baa8bb46fe9f9ffaa8fccfada4b3_692	fb55d8fe7cfc5cfebfa700165fb94f7d_4572	7073f0826909e86605b7f24ba93c455b_668	4d8fdf303c55f8e586b180af2243e275_673	2900b96dbbdb35d877a57143d080ad95_683	K_pneumoniae_3_02657
aroK		shikimate kinase AroK	6	6	1	1	10602				521	521	521	9645baa8bb46fe9f9ffaa8fccfada4b3_738	fb55d8fe7cfc5cfebfa700165fb94f7d_4520	7073f0826909e86605b7f24ba93c455b_714	4d8fdf303c55f8e586b180af2243e275_719	2900b96dbbdb35d877a57143d080ad95_729	K_pneumoniae_3_02679
WP_002920130.1		transcriptional regulator	6	6	1	1	10556				722	722	722	9645baa8bb46fe9f9ffaa8fccfada4b3_798	fb55d8fe7cfc5cfebfa700165fb94f7d_4442	7073f0826909e86605b7f24ba93c455b_774	4d8fdf303c55f8e586b180af2243e275_779	2900b96dbbdb35d877a57143d080ad95_789	K_pneumoniae_3_02710
fusA		elongation factor G	6	6	1	1	10547				2114	2114	2114	9645baa8bb46fe9f9ffaa8fccfada4b3_810	fb55d8fe7cfc5cfebfa700165fb94f7d_4430	7073f0826909e86605b7f24ba93c455b_786	4d8fdf303c55f8e586b180af2243e275_791	2900b96dbbdb35d877a57143d080ad95_801	K_pneumoniae_3_02716
rplV		50S ribosomal protein L22	6	6	1	1	10527				332	332	332	9645baa8bb46fe9f9ffaa8fccfada4b3_832	fb55d8fe7cfc5cfebfa700165fb94f7d_4380	7073f0826909e86605b7f24ba93c455b_808	4d8fdf303c55f8e586b180af2243e275_813	2900b96dbbdb35d877a57143d080ad95_823	K_pneumoniae_3_02727
rplP		50S ribosomal protein L16	6	6	1	1	10525				410	410	410	9645baa8bb46fe9f9ffaa8fccfada4b3_836	fb55d8fe7cfc5cfebfa700165fb94f7d_4376	7073f0826909e86605b7f24ba93c455b_812	4d8fdf303c55f8e586b180af2243e275_817	2900b96dbbdb35d877a57143d080ad95_827	K_pneumoniae_3_02729
rpsQ		30S ribosomal protein S17	6	6	1	1	10523				254	254	254	9645baa8bb46fe9f9ffaa8fccfada4b3_840	fb55d8fe7cfc5cfebfa700165fb94f7d_4372	7073f0826909e86605b7f24ba93c455b_816	4d8fdf303c55f8e586b180af2243e275_821	2900b96dbbdb35d877a57143d080ad95_831	K_pneumoniae_3_02731
rpsE		30S ribosomal protein S5	6	6	1	1	10514				503	503	503	9645baa8bb46fe9f9ffaa8fccfada4b3_856	fb55d8fe7cfc5cfebfa700165fb94f7d_4356	7073f0826909e86605b7f24ba93c455b_832	4d8fdf303c55f8e586b180af2243e275_837	2900b96dbbdb35d877a57143d080ad95_847	K_pneumoniae_3_02739
rpmD		50S ribosomal protein L30	6	6	1	1	10513				179	179	179	9645baa8bb46fe9f9ffaa8fccfada4b3_858	fb55d8fe7cfc5cfebfa700165fb94f7d_4354	7073f0826909e86605b7f24ba93c455b_834	4d8fdf303c55f8e586b180af2243e275_839	2900b96dbbdb35d877a57143d080ad95_849	K_pneumoniae_3_02740
trkA		Trk system potassium transporter TrkA	6	6	1	1	8046				1376	1376	1376	9645baa8bb46fe9f9ffaa8fccfada4b3_884	fb55d8fe7cfc5cfebfa700165fb94f7d_4328	7073f0826909e86605b7f24ba93c455b_860	4d8fdf303c55f8e586b180af2243e275_865	2900b96dbbdb35d877a57143d080ad95_875	K_pneumoniae_3_02751
prmA		50S ribosomal protein L11 methyltransferase	6	6	1	1	8123				881	881	881	9645baa8bb46fe9f9ffaa8fccfada4b3_933	fb55d8fe7cfc5cfebfa700165fb94f7d_4261	7073f0826909e86605b7f24ba93c455b_909	4d8fdf303c55f8e586b180af2243e275_920	2900b96dbbdb35d877a57143d080ad95_924	K_pneumoniae_3_01778
accC		acetyl-CoA carboxylase biotin carboxylase subunit	6	6	1	1	8130				1349	1349	1349	9645baa8bb46fe9f9ffaa8fccfada4b3_939	fb55d8fe7cfc5cfebfa700165fb94f7d_4239	7073f0826909e86605b7f24ba93c455b_915	4d8fdf303c55f8e586b180af2243e275_926	2900b96dbbdb35d877a57143d080ad95_930	K_pneumoniae_3_01781
mreC		rod shape-determining protein MreC	6	6	1	1	8135				992	1103	1010	9645baa8bb46fe9f9ffaa8fccfada4b3_955	fb55d8fe7cfc5cfebfa700165fb94f7d_4227	7073f0826909e86605b7f24ba93c455b_931	4d8fdf303c55f8e586b180af2243e275_942	2900b96dbbdb35d877a57143d080ad95_946	K_pneumoniae_3_01788
rng		ribonuclease G	6	6	1	1	8141				1469	1469	1469	9645baa8bb46fe9f9ffaa8fccfada4b3_961	fb55d8fe7cfc5cfebfa700165fb94f7d_4221	7073f0826909e86605b7f24ba93c455b_937	4d8fdf303c55f8e586b180af2243e275_948	2900b96dbbdb35d877a57143d080ad95_952	K_pneumoniae_3_01791
WP_002918640.1		AaeX family protein	6	6	1	1	8152				203	203	203	9645baa8bb46fe9f9ffaa8fccfada4b3_969	fb55d8fe7cfc5cfebfa700165fb94f7d_4213	7073f0826909e86605b7f24ba93c455b_945	4d8fdf303c55f8e586b180af2243e275_956	2900b96dbbdb35d877a57143d080ad95_960	K_pneumoniae_3_01795
rplM		50S ribosomal protein L13	6	6	1	1	8163				428	428	428	9645baa8bb46fe9f9ffaa8fccfada4b3_1011	fb55d8fe7cfc5cfebfa700165fb94f7d_4191	7073f0826909e86605b7f24ba93c455b_987	4d8fdf303c55f8e586b180af2243e275_998	2900b96dbbdb35d877a57143d080ad95_984	K_pneumoniae_3_01816
npr		PTS phosphocarrier protein NPr	6	6	1	1	8193				272	272	272	9645baa8bb46fe9f9ffaa8fccfada4b3_1041	fb55d8fe7cfc5cfebfa700165fb94f7d_4157	7073f0826909e86605b7f24ba93c455b_1017	4d8fdf303c55f8e586b180af2243e275_1028	2900b96dbbdb35d877a57143d080ad95_1014	K_pneumoniae_3_01830
rapZ		RNase adapter RapZ	6	6	1	1	8197				854	854	854	9645baa8bb46fe9f9ffaa8fccfada4b3_1043	fb55d8fe7cfc5cfebfa700165fb94f7d_4155	7073f0826909e86605b7f24ba93c455b_1019	4d8fdf303c55f8e586b180af2243e275_1030	2900b96dbbdb35d877a57143d080ad95_1016	K_pneumoniae_3_01831
lptB		LPS export ABC transporter ATP-binding protein	6	6	1	1	8201				725	725	725	9645baa8bb46fe9f9ffaa8fccfada4b3_1051	fb55d8fe7cfc5cfebfa700165fb94f7d_4147	7073f0826909e86605b7f24ba93c455b_1027	4d8fdf303c55f8e586b180af2243e275_1038	2900b96dbbdb35d877a57143d080ad95_1024	K_pneumoniae_3_01835
rplU		50S ribosomal protein L21	6	6	1	1	8216				311	311	311	9645baa8bb46fe9f9ffaa8fccfada4b3_1081	fb55d8fe7cfc5cfebfa700165fb94f7d_4117	7073f0826909e86605b7f24ba93c455b_1057	4d8fdf303c55f8e586b180af2243e275_1068	2900b96dbbdb35d877a57143d080ad95_1054	K_pneumoniae_3_01850
rlmE		23S rRNA (uridine(2552)-2'-O)-methyltransferase RlmE	6	6	1	1	8223				629	629	629	9645baa8bb46fe9f9ffaa8fccfada4b3_1095	fb55d8fe7cfc5cfebfa700165fb94f7d_4103	7073f0826909e86605b7f24ba93c455b_1071	4d8fdf303c55f8e586b180af2243e275_1082	2900b96dbbdb35d877a57143d080ad95_1068	K_pneumoniae_3_01857
argG		argininosuccinate synthase	6	6	1	1	8235				1343	1343	1343	9645baa8bb46fe9f9ffaa8fccfada4b3_1114	fb55d8fe7cfc5cfebfa700165fb94f7d_4088	7073f0826909e86605b7f24ba93c455b_1090	4d8fdf303c55f8e586b180af2243e275_1101	2900b96dbbdb35d877a57143d080ad95_1087	K_pneumoniae_3_01866
nusA		transcription termination factor NusA	6	6	1	1	8238				1487	1487	1487	9645baa8bb46fe9f9ffaa8fccfada4b3_1121	fb55d8fe7cfc5cfebfa700165fb94f7d_4081	7073f0826909e86605b7f24ba93c455b_1097	4d8fdf303c55f8e586b180af2243e275_1108	2900b96dbbdb35d877a57143d080ad95_1094	K_pneumoniae_3_01869
rbfA		30S ribosome-binding factor RbfA	6	6	1	1	8242				401	401	401	9645baa8bb46fe9f9ffaa8fccfada4b3_1125	fb55d8fe7cfc5cfebfa700165fb94f7d_4077	7073f0826909e86605b7f24ba93c455b_1101	4d8fdf303c55f8e586b180af2243e275_1112	2900b96dbbdb35d877a57143d080ad95_1098	K_pneumoniae_3_01871
pnp		polyribonucleotide nucleotidyltransferase	6	6	1	1	8245				2135	2135	2135	9645baa8bb46fe9f9ffaa8fccfada4b3_1131	fb55d8fe7cfc5cfebfa700165fb94f7d_4071	7073f0826909e86605b7f24ba93c455b_1107	4d8fdf303c55f8e586b180af2243e275_1118	2900b96dbbdb35d877a57143d080ad95_1104	K_pneumoniae_3_01874
WP_002918232.1		U32 family peptidase	6	6	1	1	8262				995	995	995	9645baa8bb46fe9f9ffaa8fccfada4b3_1145	fb55d8fe7cfc5cfebfa700165fb94f7d_4057	7073f0826909e86605b7f24ba93c455b_1121	4d8fdf303c55f8e586b180af2243e275_1132	2900b96dbbdb35d877a57143d080ad95_1144	K_pneumoniae_3_01894
diaA		DnaA initiator-associating protein DiaA	6	6	1	1	8271				590	590	590	9645baa8bb46fe9f9ffaa8fccfada4b3_1163	fb55d8fe7cfc5cfebfa700165fb94f7d_4039	7073f0826909e86605b7f24ba93c455b_1139	4d8fdf303c55f8e586b180af2243e275_1150	2900b96dbbdb35d877a57143d080ad95_1162	K_pneumoniae_3_01903
garR		2-hydroxy-3-oxopropionate reductase	6	6	1	1	8296				890	890	890	9645baa8bb46fe9f9ffaa8fccfada4b3_1177	fb55d8fe7cfc5cfebfa700165fb94f7d_3995	7073f0826909e86605b7f24ba93c455b_1153	4d8fdf303c55f8e586b180af2243e275_1164	2900b96dbbdb35d877a57143d080ad95_1176	K_pneumoniae_3_01911
uxaC		glucuronate isomerase	6	6	1	1	8384				1412	1412	1412	9645baa8bb46fe9f9ffaa8fccfada4b3_1216	fb55d8fe7cfc5cfebfa700165fb94f7d_3934	7073f0826909e86605b7f24ba93c455b_1192	4d8fdf303c55f8e586b180af2243e275_1203	2900b96dbbdb35d877a57143d080ad95_1215	K_pneumoniae_3_01930
rpoD		RNA polymerase sigma factor RpoD	6	6	1	1	8495				1841	1841	1841	9645baa8bb46fe9f9ffaa8fccfada4b3_1311	fb55d8fe7cfc5cfebfa700165fb94f7d_3883	7073f0826909e86605b7f24ba93c455b_1401	4d8fdf303c55f8e586b180af2243e275_1392	2900b96dbbdb35d877a57143d080ad95_1310	K_pneumoniae_3_01976
metK		methionine adenosyltransferase	6	6	1	1	10783				1154	1154	1154	9645baa8bb46fe9f9ffaa8fccfada4b3_1503	fb55d8fe7cfc5cfebfa700165fb94f7d_3510	7073f0826909e86605b7f24ba93c455b_1611	4d8fdf303c55f8e586b180af2243e275_1596	2900b96dbbdb35d877a57143d080ad95_1508	K_pneumoniae_3_02074
speA		biosynthetic arginine decarboxylase	6	6	1	1	10785				1976	1976	1976	9645baa8bb46fe9f9ffaa8fccfada4b3_1509	fb55d8fe7cfc5cfebfa700165fb94f7d_3506	7073f0826909e86605b7f24ba93c455b_1615	4d8fdf303c55f8e586b180af2243e275_1600	2900b96dbbdb35d877a57143d080ad95_1514	K_pneumoniae_3_02075
pgk		phosphoglycerate kinase	6	6	1	1	10802				1163	1163	1163	9645baa8bb46fe9f9ffaa8fccfada4b3_1551	fb55d8fe7cfc5cfebfa700165fb94f7d_3470	7073f0826909e86605b7f24ba93c455b_1657	4d8fdf303c55f8e586b180af2243e275_1642	2900b96dbbdb35d877a57143d080ad95_1528	K_pneumoniae_3_02080
argP		DNA-binding transcriptional regulator ArgP	6	6	1	1	10814				893	893	893	9645baa8bb46fe9f9ffaa8fccfada4b3_1561	fb55d8fe7cfc5cfebfa700165fb94f7d_3454	7073f0826909e86605b7f24ba93c455b_1667	4d8fdf303c55f8e586b180af2243e275_1652	2900b96dbbdb35d877a57143d080ad95_1538	K_pneumoniae_3_02085
rpiA		ribose-5-phosphate isomerase RpiA	6	6	1	1	10829				659	659	659	9645baa8bb46fe9f9ffaa8fccfada4b3_1563	fb55d8fe7cfc5cfebfa700165fb94f7d_3450	7073f0826909e86605b7f24ba93c455b_1669	4d8fdf303c55f8e586b180af2243e275_1654	2900b96dbbdb35d877a57143d080ad95_1540	K_pneumoniae_3_02086
pyrG		CTP synthase (glutamine hydrolyzing)	6	6	1	1	11310				1637	1637	1637	9645baa8bb46fe9f9ffaa8fccfada4b3_2007	fb55d8fe7cfc5cfebfa700165fb94f7d_3146	7073f0826909e86605b7f24ba93c455b_2119	4d8fdf303c55f8e586b180af2243e275_2131	2900b96dbbdb35d877a57143d080ad95_1979	K_pneumoniae_3_04332
eno		phosphopyruvate hydratase	6	6	1	1	11295				1298	1298	1298	9645baa8bb46fe9f9ffaa8fccfada4b3_2009	fb55d8fe7cfc5cfebfa700165fb94f7d_3144	7073f0826909e86605b7f24ba93c455b_2121	4d8fdf303c55f8e586b180af2243e275_2133	2900b96dbbdb35d877a57143d080ad95_1981	K_pneumoniae_3_04331
cysH		phosphoadenosine phosphosulfate reductase	6	6	1	1	11270				734	734	734	9645baa8bb46fe9f9ffaa8fccfada4b3_2021	fb55d8fe7cfc5cfebfa700165fb94f7d_3100	7073f0826909e86605b7f24ba93c455b_2133	4d8fdf303c55f8e586b180af2243e275_2145	2900b96dbbdb35d877a57143d080ad95_1993	K_pneumoniae_3_04325
cysD		sulfate adenylyltransferase subunit CysD	6	6	1	1	11254				908	908	908	9645baa8bb46fe9f9ffaa8fccfada4b3_2027	fb55d8fe7cfc5cfebfa700165fb94f7d_3094	7073f0826909e86605b7f24ba93c455b_2139	4d8fdf303c55f8e586b180af2243e275_2151	2900b96dbbdb35d877a57143d080ad95_1999	K_pneumoniae_3_04312
hycE		formate hydrogenlyase subunit HycE	6	6	1	1	11211				1709	1709	1709	9645baa8bb46fe9f9ffaa8fccfada4b3_2141	fb55d8fe7cfc5cfebfa700165fb94f7d_3026	7073f0826909e86605b7f24ba93c455b_2253	4d8fdf303c55f8e586b180af2243e275_2287	2900b96dbbdb35d877a57143d080ad95_2113	K_pneumoniae_3_04258
nadK		NAD(+) kinase	6	6	1	1	2117				878	878	878	9645baa8bb46fe9f9ffaa8fccfada4b3_2384	fb55d8fe7cfc5cfebfa700165fb94f7d_2878	7073f0826909e86605b7f24ba93c455b_2463	4d8fdf303c55f8e586b180af2243e275_2527	2900b96dbbdb35d877a57143d080ad95_2333	K_pneumoniae_3_04158
ffh		signal recognition particle protein	6	6	1	1	2121				1361	1364	1363	9645baa8bb46fe9f9ffaa8fccfada4b3_2392	fb55d8fe7cfc5cfebfa700165fb94f7d_2870	7073f0826909e86605b7f24ba93c455b_2471	4d8fdf303c55f8e586b180af2243e275_2535	2900b96dbbdb35d877a57143d080ad95_2341	K_pneumoniae_3_04154
trmD		tRNA (guanosine(37)-N1)-methyltransferase TrmD	6	6	1	1	2126				767	767	767	9645baa8bb46fe9f9ffaa8fccfada4b3_2398	fb55d8fe7cfc5cfebfa700165fb94f7d_2864	7073f0826909e86605b7f24ba93c455b_2477	4d8fdf303c55f8e586b180af2243e275_2541	2900b96dbbdb35d877a57143d080ad95_2347	K_pneumoniae_3_04151
rpoE		RNA polymerase sigma factor RpoE	6	6	1	1	2175				575	575	575	9645baa8bb46fe9f9ffaa8fccfada4b3_2471	fb55d8fe7cfc5cfebfa700165fb94f7d_2787	7073f0826909e86605b7f24ba93c455b_2548	4d8fdf303c55f8e586b180af2243e275_2612	2900b96dbbdb35d877a57143d080ad95_2418	K_pneumoniae_3_01755
rnc		ribonuclease III	6	6	1	1	2169				680	680	680	9645baa8bb46fe9f9ffaa8fccfada4b3_2483	fb55d8fe7cfc5cfebfa700165fb94f7d_2775	7073f0826909e86605b7f24ba93c455b_2560	4d8fdf303c55f8e586b180af2243e275_2624	2900b96dbbdb35d877a57143d080ad95_2430	K_pneumoniae_3_01749
era		GTPase Era	6	6	1	1	3643				905	905	905	9645baa8bb46fe9f9ffaa8fccfada4b3_2485	fb55d8fe7cfc5cfebfa700165fb94f7d_2773	7073f0826909e86605b7f24ba93c455b_2562	4d8fdf303c55f8e586b180af2243e275_2626	2900b96dbbdb35d877a57143d080ad95_2432	K_pneumoniae_3_01748
iscU		Fe-S cluster assembly scaffold IscU	6	6	1	1	3689				386	386	386	9645baa8bb46fe9f9ffaa8fccfada4b3_2545	fb55d8fe7cfc5cfebfa700165fb94f7d_2709	7073f0826909e86605b7f24ba93c455b_2622	4d8fdf303c55f8e586b180af2243e275_2686	2900b96dbbdb35d877a57143d080ad95_2492	K_pneumoniae_3_01718
ndk		nucleoside-diphosphate kinase	6	6	1	1	3702				431	431	431	9645baa8bb46fe9f9ffaa8fccfada4b3_2569	fb55d8fe7cfc5cfebfa700165fb94f7d_2685	7073f0826909e86605b7f24ba93c455b_2646	4d8fdf303c55f8e586b180af2243e275_2710	2900b96dbbdb35d877a57143d080ad95_2516	K_pneumoniae_3_01706
guaB		IMP dehydrogenase	6	6	1	1	3715				1466	1466	1466	9645baa8bb46fe9f9ffaa8fccfada4b3_2595	fb55d8fe7cfc5cfebfa700165fb94f7d_2659	7073f0826909e86605b7f24ba93c455b_2672	4d8fdf303c55f8e586b180af2243e275_2732	2900b96dbbdb35d877a57143d080ad95_2538	K_pneumoniae_3_01695
guaA		glutamine-hydrolyzing GMP synthase	6	6	1	1	3742				1577	1577	1577	9645baa8bb46fe9f9ffaa8fccfada4b3_2597	fb55d8fe7cfc5cfebfa700165fb94f7d_2657	7073f0826909e86605b7f24ba93c455b_2674	4d8fdf303c55f8e586b180af2243e275_2734	2900b96dbbdb35d877a57143d080ad95_2540	K_pneumoniae_3_01694
bcp		thioredoxin-dependent thiol peroxidase	6	6	1	1	3792				470	470	470	9645baa8bb46fe9f9ffaa8fccfada4b3_2639	fb55d8fe7cfc5cfebfa700165fb94f7d_2625	7073f0826909e86605b7f24ba93c455b_2716	4d8fdf303c55f8e586b180af2243e275_2808	2900b96dbbdb35d877a57143d080ad95_2582	K_pneumoniae_3_01673
eutM		ethanolamine utilization microcompartment protein EutM	6	6	1	1	3817				290	293	290	9645baa8bb46fe9f9ffaa8fccfada4b3_2687	fb55d8fe7cfc5cfebfa700165fb94f7d_2575	7073f0826909e86605b7f24ba93c455b_2764	4d8fdf303c55f8e586b180af2243e275_2856	2900b96dbbdb35d877a57143d080ad95_2630	K_pneumoniae_3_01650
cysT		sulfate/thiosulfate ABC transporter permease CysT	6	6	1	1	3840				833	833	833	9645baa8bb46fe9f9ffaa8fccfada4b3_2727	fb55d8fe7cfc5cfebfa700165fb94f7d_2529	7073f0826909e86605b7f24ba93c455b_2804	4d8fdf303c55f8e586b180af2243e275_2896	2900b96dbbdb35d877a57143d080ad95_2670	K_pneumoniae_3_01631
ptsI		phosphoenolpyruvate-protein phosphotransferase PtsI	6	6	1	1	3852				1727	1727	1727	9645baa8bb46fe9f9ffaa8fccfada4b3_2745	fb55d8fe7cfc5cfebfa700165fb94f7d_2515	7073f0826909e86605b7f24ba93c455b_2822	4d8fdf303c55f8e586b180af2243e275_2914	2900b96dbbdb35d877a57143d080ad95_2688	K_pneumoniae_3_01622
cysK		cysteine synthase A	6	6	1	1	3870				971	971	971	9645baa8bb46fe9f9ffaa8fccfada4b3_2749	fb55d8fe7cfc5cfebfa700165fb94f7d_2511	7073f0826909e86605b7f24ba93c455b_2826	4d8fdf303c55f8e586b180af2243e275_2918	2900b96dbbdb35d877a57143d080ad95_2692	K_pneumoniae_3_01620
alaC		alanine transaminase	6	6	1	1	3254				1214	1238	1218	9645baa8bb46fe9f9ffaa8fccfada4b3_2814	fb55d8fe7cfc5cfebfa700165fb94f7d_2433	7073f0826909e86605b7f24ba93c455b_2891	4d8fdf303c55f8e586b180af2243e275_2983	2900b96dbbdb35d877a57143d080ad95_2754	K_pneumoniae_3_01594
fabB		beta-ketoacyl-ACP synthase I	6	6	1	1	3197				1220	1220	1220	9645baa8bb46fe9f9ffaa8fccfada4b3_2861	fb55d8fe7cfc5cfebfa700165fb94f7d_2330	7073f0826909e86605b7f24ba93c455b_2938	4d8fdf303c55f8e586b180af2243e275_3030	2900b96dbbdb35d877a57143d080ad95_2921	K_pneumoniae_3_01547
purF		amidophosphoribosyltransferase	6	6	1	1	3181				1517	1517	1517	9645baa8bb46fe9f9ffaa8fccfada4b3_2883	fb55d8fe7cfc5cfebfa700165fb94f7d_2308	7073f0826909e86605b7f24ba93c455b_2960	4d8fdf303c55f8e586b180af2243e275_3052	2900b96dbbdb35d877a57143d080ad95_2943	K_pneumoniae_3_01536
pta		phosphate acetyltransferase	6	6	1	1	3167				2144	2147	2146	9645baa8bb46fe9f9ffaa8fccfada4b3_2925	fb55d8fe7cfc5cfebfa700165fb94f7d_2280	7073f0826909e86605b7f24ba93c455b_2992	4d8fdf303c55f8e586b180af2243e275_3084	2900b96dbbdb35d877a57143d080ad95_2975	K_pneumoniae_3_01522
lplA		lipoate--protein ligase LplA	6	7	1.17	1	2725				137	1016	872	9645baa8bb46fe9f9ffaa8fccfada4b3_8527	fb55d8fe7cfc5cfebfa700165fb94f7d_7092	7073f0826909e86605b7f24ba93c455b_8815	4d8fdf303c55f8e586b180af2243e275_9035 4d8fdf303c55f8e586b180af2243e275_9013	2900b96dbbdb35d877a57143d080ad95_9176	K_pneumoniae_3_03391
ackA		acetate kinase	6	6	1	1	4917				1202	1202	1202	9645baa8bb46fe9f9ffaa8fccfada4b3_2927	fb55d8fe7cfc5cfebfa700165fb94f7d_2278	7073f0826909e86605b7f24ba93c455b_2994	4d8fdf303c55f8e586b180af2243e275_3086	2900b96dbbdb35d877a57143d080ad95_2977	K_pneumoniae_3_01521
alaA		alanine transaminase AlaA	6	6	1	1	4925				1217	1217	1217	9645baa8bb46fe9f9ffaa8fccfada4b3_2939	fb55d8fe7cfc5cfebfa700165fb94f7d_2266	7073f0826909e86605b7f24ba93c455b_3006	4d8fdf303c55f8e586b180af2243e275_3098	2900b96dbbdb35d877a57143d080ad95_2989	K_pneumoniae_3_01515
nuoC		NADH-quinone oxidoreductase subunit C/D	6	6	1	1	4929				1802	1808	1807	9645baa8bb46fe9f9ffaa8fccfada4b3_2947	fb55d8fe7cfc5cfebfa700165fb94f7d_2258	7073f0826909e86605b7f24ba93c455b_3014	4d8fdf303c55f8e586b180af2243e275_3106	2900b96dbbdb35d877a57143d080ad95_2997	K_pneumoniae_3_01511
nuoE		NADH-quinone oxidoreductase subunit NuoE	6	6	1	1	4930				500	500	500	9645baa8bb46fe9f9ffaa8fccfada4b3_2949	fb55d8fe7cfc5cfebfa700165fb94f7d_2256	7073f0826909e86605b7f24ba93c455b_3016	4d8fdf303c55f8e586b180af2243e275_3108	2900b96dbbdb35d877a57143d080ad95_2999	K_pneumoniae_3_01510
nuoF		NADH-quinone oxidoreductase subunit NuoF	6	6	1	1	4931				1337	1337	1337	9645baa8bb46fe9f9ffaa8fccfada4b3_2951	fb55d8fe7cfc5cfebfa700165fb94f7d_2254	7073f0826909e86605b7f24ba93c455b_3018	4d8fdf303c55f8e586b180af2243e275_3110	2900b96dbbdb35d877a57143d080ad95_3001	K_pneumoniae_3_01509
menB		1,4-dihydroxy-2-naphthoyl-CoA synthase	6	6	1	1	4955				857	857	857	9645baa8bb46fe9f9ffaa8fccfada4b3_2979	fb55d8fe7cfc5cfebfa700165fb94f7d_2218	7073f0826909e86605b7f24ba93c455b_3046	4d8fdf303c55f8e586b180af2243e275_3138	2900b96dbbdb35d877a57143d080ad95_3029	K_pneumoniae_3_01495
rhmD		L-rhamnonate dehydratase	6	6	1	1	4972				1205	1205	1205	9645baa8bb46fe9f9ffaa8fccfada4b3_2995	fb55d8fe7cfc5cfebfa700165fb94f7d_2186	7073f0826909e86605b7f24ba93c455b_3062	4d8fdf303c55f8e586b180af2243e275_3154	2900b96dbbdb35d877a57143d080ad95_3045	K_pneumoniae_3_01487
nrdB		ribonucleotide-diphosphate reductase subunit beta	6	6	1	1	4984				1130	1130	1130	9645baa8bb46fe9f9ffaa8fccfada4b3_3013	fb55d8fe7cfc5cfebfa700165fb94f7d_2162	7073f0826909e86605b7f24ba93c455b_3080	4d8fdf303c55f8e586b180af2243e275_3172	2900b96dbbdb35d877a57143d080ad95_3063	K_pneumoniae_3_01478
rcsB		transcriptional regulator RcsB	6	6	1	1	5018				650	650	650	9645baa8bb46fe9f9ffaa8fccfada4b3_3023	fb55d8fe7cfc5cfebfa700165fb94f7d_2128	7073f0826909e86605b7f24ba93c455b_3090	4d8fdf303c55f8e586b180af2243e275_3182	2900b96dbbdb35d877a57143d080ad95_3073	K_pneumoniae_3_01473
fruK		1-phosphofructokinase	6	6	1	1	5101				938	938	938	9645baa8bb46fe9f9ffaa8fccfada4b3_3102	fb55d8fe7cfc5cfebfa700165fb94f7d_2029	7073f0826909e86605b7f24ba93c455b_3169	4d8fdf303c55f8e586b180af2243e275_3261	2900b96dbbdb35d877a57143d080ad95_3154	K_pneumoniae_3_01434
yegQ		tRNA 5-hydroxyuridine modification protein YegQ	6	6	1	1	5219				1361	1361	1361	9645baa8bb46fe9f9ffaa8fccfada4b3_3223	fb55d8fe7cfc5cfebfa700165fb94f7d_1866	7073f0826909e86605b7f24ba93c455b_3292	4d8fdf303c55f8e586b180af2243e275_3394	2900b96dbbdb35d877a57143d080ad95_3289	K_pneumoniae_3_01368
dcd		dCTP deaminase	6	6	1	1	5234				581	581	581	9645baa8bb46fe9f9ffaa8fccfada4b3_3253	fb55d8fe7cfc5cfebfa700165fb94f7d_1832	7073f0826909e86605b7f24ba93c455b_3322	4d8fdf303c55f8e586b180af2243e275_3424	2900b96dbbdb35d877a57143d080ad95_3319	K_pneumoniae_3_01353
gndA		NADP-dependent phosphogluconate dehydrogenase	6	6	1	1	5346				1406	1406	1406	9645baa8bb46fe9f9ffaa8fccfada4b3_3291	fb55d8fe7cfc5cfebfa700165fb94f7d_1760	7073f0826909e86605b7f24ba93c455b_3360	4d8fdf303c55f8e586b180af2243e275_3462	2900b96dbbdb35d877a57143d080ad95_3355	K_pneumoniae_3_01335
hisF		imidazole glycerol phosphate synthase subunit HisF	6	6	1	1	5350				776	776	776	9645baa8bb46fe9f9ffaa8fccfada4b3_3329	fb55d8fe7cfc5cfebfa700165fb94f7d_1752	7073f0826909e86605b7f24ba93c455b_3388	4d8fdf303c55f8e586b180af2243e275_3490	2900b96dbbdb35d877a57143d080ad95_3383	K_pneumoniae_3_01323
plaP		putrescine/proton symporter PlaP	6	6	1	1	5362				1358	1358	1358	9645baa8bb46fe9f9ffaa8fccfada4b3_3352	fb55d8fe7cfc5cfebfa700165fb94f7d_1725	7073f0826909e86605b7f24ba93c455b_3409	4d8fdf303c55f8e586b180af2243e275_3511	2900b96dbbdb35d877a57143d080ad95_3404	K_pneumoniae_3_01314
WP_002911883.1		DUF496 family protein	6	6	1	1	6630				323	329	324	9645baa8bb46fe9f9ffaa8fccfada4b3_3368	fb55d8fe7cfc5cfebfa700165fb94f7d_1713	7073f0826909e86605b7f24ba93c455b_3423	4d8fdf303c55f8e586b180af2243e275_3525	2900b96dbbdb35d877a57143d080ad95_3418	K_pneumoniae_3_01307
uvrC		excinuclease ABC subunit UvrC	6	6	1	1	6285				1832	1832	1832	9645baa8bb46fe9f9ffaa8fccfada4b3_3493	fb55d8fe7cfc5cfebfa700165fb94f7d_1416	7073f0826909e86605b7f24ba93c455b_3546	4d8fdf303c55f8e586b180af2243e275_3750	2900b96dbbdb35d877a57143d080ad95_3658	K_pneumoniae_3_01249
ruvC		crossover junction endodeoxyribonuclease RuvC	6	6	1	1	6075				521	521	521	9645baa8bb46fe9f9ffaa8fccfada4b3_3570	fb55d8fe7cfc5cfebfa700165fb94f7d_1089	7073f0826909e86605b7f24ba93c455b_3623	4d8fdf303c55f8e586b180af2243e275_3827	2900b96dbbdb35d877a57143d080ad95_3737	K_pneumoniae_3_01215
ruvA		Holliday junction branch migration protein RuvA	6	6	1	1	6078				611	611	611	9645baa8bb46fe9f9ffaa8fccfada4b3_3572	fb55d8fe7cfc5cfebfa700165fb94f7d_1083	7073f0826909e86605b7f24ba93c455b_3625	4d8fdf303c55f8e586b180af2243e275_3829	2900b96dbbdb35d877a57143d080ad95_3739	K_pneumoniae_3_01214
pyk		pyruvate kinase	6	6	1	1	6220				1442	1442	1442	9645baa8bb46fe9f9ffaa8fccfada4b3_3586	fb55d8fe7cfc5cfebfa700165fb94f7d_1066	7073f0826909e86605b7f24ba93c455b_3639	4d8fdf303c55f8e586b180af2243e275_3843	2900b96dbbdb35d877a57143d080ad95_3753	K_pneumoniae_3_01207
zwf		glucose-6-phosphate dehydrogenase	6	6	1	1	6218				1475	1475	1475	9645baa8bb46fe9f9ffaa8fccfada4b3_3592	fb55d8fe7cfc5cfebfa700165fb94f7d_1062	7073f0826909e86605b7f24ba93c455b_3645	4d8fdf303c55f8e586b180af2243e275_3849	2900b96dbbdb35d877a57143d080ad95_3759	K_pneumoniae_3_01205
minD		septum site-determining protein MinD	6	6	1	1	2312				812	812	812	9645baa8bb46fe9f9ffaa8fccfada4b3_3694	fb55d8fe7cfc5cfebfa700165fb94f7d_9584	7073f0826909e86605b7f24ba93c455b_3747	4d8fdf303c55f8e586b180af2243e275_3951	2900b96dbbdb35d877a57143d080ad95_3865	K_pneumoniae_3_01156
prs		ribose-phosphate diphosphokinase	6	6	1	1	2253				947	947	947	9645baa8bb46fe9f9ffaa8fccfada4b3_3860	fb55d8fe7cfc5cfebfa700165fb94f7d_9711	7073f0826909e86605b7f24ba93c455b_3907	4d8fdf303c55f8e586b180af2243e275_4244	2900b96dbbdb35d877a57143d080ad95_4169	K_pneumoniae_3_01088
kdsA		3-deoxy-8-phosphooctulonate synthase	6	6	1	1	2245				854	854	854	9645baa8bb46fe9f9ffaa8fccfada4b3_3876	fb55d8fe7cfc5cfebfa700165fb94f7d_9727	7073f0826909e86605b7f24ba93c455b_3923	4d8fdf303c55f8e586b180af2243e275_4260	2900b96dbbdb35d877a57143d080ad95_4189	K_pneumoniae_3_01080
purU		formyltetrahydrofolate deformylase	6	6	1	1	2210				842	842	842	9645baa8bb46fe9f9ffaa8fccfada4b3_3937	fb55d8fe7cfc5cfebfa700165fb94f7d_9775	7073f0826909e86605b7f24ba93c455b_3990	4d8fdf303c55f8e586b180af2243e275_4327	2900b96dbbdb35d877a57143d080ad95_4253	K_pneumoniae_3_01056
adhE		bifunctional acetaldehyde-CoA/alcohol dehydrogenase	6	6	1	1	2046				2675	2675	2675	9645baa8bb46fe9f9ffaa8fccfada4b3_3953	fb55d8fe7cfc5cfebfa700165fb94f7d_9791	7073f0826909e86605b7f24ba93c455b_4006	4d8fdf303c55f8e586b180af2243e275_4343	2900b96dbbdb35d877a57143d080ad95_4269	K_pneumoniae_3_01049
oppB		oligopeptide ABC transporter permease OppB	6	6	1	1	2036				920	920	920	9645baa8bb46fe9f9ffaa8fccfada4b3_3961	fb55d8fe7cfc5cfebfa700165fb94f7d_9801	7073f0826909e86605b7f24ba93c455b_4014	4d8fdf303c55f8e586b180af2243e275_4351	2900b96dbbdb35d877a57143d080ad95_4277	K_pneumoniae_3_01046
oppF		murein tripeptide/oligopeptide ABC transporter ATP-binding protein OppF	6	6	1	1	2032				1004	1004	1004	9645baa8bb46fe9f9ffaa8fccfada4b3_3967	fb55d8fe7cfc5cfebfa700165fb94f7d_9807	7073f0826909e86605b7f24ba93c455b_4020	4d8fdf303c55f8e586b180af2243e275_4357	2900b96dbbdb35d877a57143d080ad95_4283	K_pneumoniae_3_01043
infC		translation initiation factor IF-3	6	6	1	1	9753				434	542	524	9645baa8bb46fe9f9ffaa8fccfada4b3_3997	fb55d8fe7cfc5cfebfa700165fb94f7d_788	7073f0826909e86605b7f24ba93c455b_4050	4d8fdf303c55f8e586b180af2243e275_4387	2900b96dbbdb35d877a57143d080ad95_4313	K_pneumoniae_3_01029
pheS		phenylalanine--tRNA ligase subunit alpha	6	6	1	1	3965				983	983	983	9645baa8bb46fe9f9ffaa8fccfada4b3_4006	fb55d8fe7cfc5cfebfa700165fb94f7d_779	7073f0826909e86605b7f24ba93c455b_4059	4d8fdf303c55f8e586b180af2243e275_4396	2900b96dbbdb35d877a57143d080ad95_4322	K_pneumoniae_3_01026
ppsA		phosphoenolpyruvate synthase	6	6	1	1	3977				2378	2378	2378	9645baa8bb46fe9f9ffaa8fccfada4b3_4040	fb55d8fe7cfc5cfebfa700165fb94f7d_755	7073f0826909e86605b7f24ba93c455b_4093	4d8fdf303c55f8e586b180af2243e275_4430	2900b96dbbdb35d877a57143d080ad95_4356	K_pneumoniae_3_01010
sufB		Fe-S cluster assembly protein SufB	6	6	1	1	3996				1487	1487	1487	9645baa8bb46fe9f9ffaa8fccfada4b3_4089	fb55d8fe7cfc5cfebfa700165fb94f7d_714	7073f0826909e86605b7f24ba93c455b_4282	4d8fdf303c55f8e586b180af2243e275_4479	2900b96dbbdb35d877a57143d080ad95_4401	K_pneumoniae_3_00988
gntU		gluconate transporter	6	6	1	1	10092				1265	1340	1327	9645baa8bb46fe9f9ffaa8fccfada4b3_656	fb55d8fe7cfc5cfebfa700165fb94f7d_4620	7073f0826909e86605b7f24ba93c455b_636	4d8fdf303c55f8e586b180af2243e275_641	2900b96dbbdb35d877a57143d080ad95_647	K_pneumoniae_3_02640
gloA		lactoylglutathione lyase	6	6	1	1	4072				407	407	407	9645baa8bb46fe9f9ffaa8fccfada4b3_4428	fb55d8fe7cfc5cfebfa700165fb94f7d_640	7073f0826909e86605b7f24ba93c455b_4603	4d8fdf303c55f8e586b180af2243e275_4766	2900b96dbbdb35d877a57143d080ad95_4716	K_pneumoniae_3_03758
rsxA		electron transport complex subunit RsxA	6	6	1	1	11422				581	581	581	9645baa8bb46fe9f9ffaa8fccfada4b3_4478	fb55d8fe7cfc5cfebfa700165fb94f7d_590	7073f0826909e86605b7f24ba93c455b_4653	4d8fdf303c55f8e586b180af2243e275_4816	2900b96dbbdb35d877a57143d080ad95_4766	K_pneumoniae_3_03732
rimP		ribosome maturation factor RimP	6	6	1	1	8236				422	452	447	9645baa8bb46fe9f9ffaa8fccfada4b3_1119	fb55d8fe7cfc5cfebfa700165fb94f7d_4083	7073f0826909e86605b7f24ba93c455b_1095	4d8fdf303c55f8e586b180af2243e275_1106	2900b96dbbdb35d877a57143d080ad95_1092	K_pneumoniae_3_01868
fnr		fumarate/nitrate reduction transcriptional regulator Fnr	6	6	1	1	2583				752	752	752	9645baa8bb46fe9f9ffaa8fccfada4b3_5385	fb55d8fe7cfc5cfebfa700165fb94f7d_218	7073f0826909e86605b7f24ba93c455b_5577	4d8fdf303c55f8e586b180af2243e275_5622	2900b96dbbdb35d877a57143d080ad95_5715	K_pneumoniae_3_04037
yedF		sulfurtransferase-like selenium metabolism protein YedF	6	6	1	1	6266				233	233	233	9645baa8bb46fe9f9ffaa8fccfada4b3_5437	fb55d8fe7cfc5cfebfa700165fb94f7d_1452	7073f0826909e86605b7f24ba93c455b_5629	4d8fdf303c55f8e586b180af2243e275_5674	2900b96dbbdb35d877a57143d080ad95_5767	K_pneumoniae_3_04062
prfB		peptide chain release factor 2	6	6	1	1	10912				962	1022	1012	9645baa8bb46fe9f9ffaa8fccfada4b3_1624	fb55d8fe7cfc5cfebfa700165fb94f7d_3401	7073f0826909e86605b7f24ba93c455b_1730	4d8fdf303c55f8e586b180af2243e275_1712	2900b96dbbdb35d877a57143d080ad95_1598	K_pneumoniae_3_02113
chbB		PTS N,N'-diacetylchitobiose transporter subunit IIB	6	6	1	1	7299				320	320	320	9645baa8bb46fe9f9ffaa8fccfada4b3_5868	fb55d8fe7cfc5cfebfa700165fb94f7d_834	7073f0826909e86605b7f24ba93c455b_6056	4d8fdf303c55f8e586b180af2243e275_6201	2900b96dbbdb35d877a57143d080ad95_6174	K_pneumoniae_3_02961
gapA		glyceraldehyde-3-phosphate dehydrogenase	6	6	1	1	7118				995	995	995	9645baa8bb46fe9f9ffaa8fccfada4b3_5934	fb55d8fe7cfc5cfebfa700165fb94f7d_916	7073f0826909e86605b7f24ba93c455b_6122	4d8fdf303c55f8e586b180af2243e275_6267	2900b96dbbdb35d877a57143d080ad95_6256	K_pneumoniae_3_02995
potC		spermidine/putrescine ABC transporter permease PotC	6	6	1	1	1244				785	794	786	9645baa8bb46fe9f9ffaa8fccfada4b3_6091	fb55d8fe7cfc5cfebfa700165fb94f7d_9398	7073f0826909e86605b7f24ba93c455b_6414	4d8fdf303c55f8e586b180af2243e275_6459	2900b96dbbdb35d877a57143d080ad95_6592	K_pneumoniae_3_00907
ptsG		PTS glucose transporter subunit IIBC	6	6	1	1	1215				1433	1433	1433	9645baa8bb46fe9f9ffaa8fccfada4b3_6161	fb55d8fe7cfc5cfebfa700165fb94f7d_9352	7073f0826909e86605b7f24ba93c455b_6484	4d8fdf303c55f8e586b180af2243e275_6531	2900b96dbbdb35d877a57143d080ad95_6662	K_pneumoniae_3_00875
fabF		beta-ketoacyl-ACP synthase II	6	6	1	1	1209				1241	1241	1241	9645baa8bb46fe9f9ffaa8fccfada4b3_6173	fb55d8fe7cfc5cfebfa700165fb94f7d_9340	7073f0826909e86605b7f24ba93c455b_6496	4d8fdf303c55f8e586b180af2243e275_6543	2900b96dbbdb35d877a57143d080ad95_6674	K_pneumoniae_3_00869
gcvA		glycine cleavage system transcriptional regulator GcvA	6	6	1	1	11336				824	917	901	9645baa8bb46fe9f9ffaa8fccfada4b3_1931	fb55d8fe7cfc5cfebfa700165fb94f7d_3198	7073f0826909e86605b7f24ba93c455b_2043	4d8fdf303c55f8e586b180af2243e275_2055	2900b96dbbdb35d877a57143d080ad95_1903	K_pneumoniae_3_02260
phoH		phosphate starvation-inducible protein PhoH	6	6	1	1	1101				788	788	788	9645baa8bb46fe9f9ffaa8fccfada4b3_6270	fb55d8fe7cfc5cfebfa700165fb94f7d_9205	7073f0826909e86605b7f24ba93c455b_6589	4d8fdf303c55f8e586b180af2243e275_6636	2900b96dbbdb35d877a57143d080ad95_6769	K_pneumoniae_3_00823
putP		sodium/proline symporter PutP	6	6	1	1	1094				1508	1508	1508	9645baa8bb46fe9f9ffaa8fccfada4b3_6282	fb55d8fe7cfc5cfebfa700165fb94f7d_9197	7073f0826909e86605b7f24ba93c455b_6601	4d8fdf303c55f8e586b180af2243e275_6648	2900b96dbbdb35d877a57143d080ad95_6781	K_pneumoniae_3_00817
WP_004144085.1		CoA-binding protein	6	6	1	1	1038				413	413	413	9645baa8bb46fe9f9ffaa8fccfada4b3_6373	fb55d8fe7cfc5cfebfa700165fb94f7d_9104	7073f0826909e86605b7f24ba93c455b_6730	4d8fdf303c55f8e586b180af2243e275_6756	2900b96dbbdb35d877a57143d080ad95_6870	K_pneumoniae_3_00767
asnS		asparagine--tRNA ligase	6	6	1	1	928				1400	1400	1400	9645baa8bb46fe9f9ffaa8fccfada4b3_6437	fb55d8fe7cfc5cfebfa700165fb94f7d_9048	7073f0826909e86605b7f24ba93c455b_6794	4d8fdf303c55f8e586b180af2243e275_6820	2900b96dbbdb35d877a57143d080ad95_6934	K_pneumoniae_3_00736
ihfB		integration host factor subunit beta	6	6	1	1	910				284	287	286	9645baa8bb46fe9f9ffaa8fccfada4b3_6473	fb55d8fe7cfc5cfebfa700165fb94f7d_9012	7073f0826909e86605b7f24ba93c455b_6830	4d8fdf303c55f8e586b180af2243e275_6856	2900b96dbbdb35d877a57143d080ad95_6970	K_pneumoniae_3_00717
pflB		formate C-acetyltransferase	6	6	1	1	894				2282	2282	2282	9645baa8bb46fe9f9ffaa8fccfada4b3_6489	fb55d8fe7cfc5cfebfa700165fb94f7d_8994	7073f0826909e86605b7f24ba93c455b_6846	4d8fdf303c55f8e586b180af2243e275_6872	2900b96dbbdb35d877a57143d080ad95_6986	K_pneumoniae_3_00709
pflA		pyruvate formate lyase 1-activating protein	6	6	1	1	887				740	740	740	9645baa8bb46fe9f9ffaa8fccfada4b3_6491	fb55d8fe7cfc5cfebfa700165fb94f7d_8992	7073f0826909e86605b7f24ba93c455b_6848	4d8fdf303c55f8e586b180af2243e275_6874	2900b96dbbdb35d877a57143d080ad95_6988	K_pneumoniae_3_00708
rarA		replication-associated recombination protein RarA	6	6	1	1	880				1343	1343	1343	9645baa8bb46fe9f9ffaa8fccfada4b3_6503	fb55d8fe7cfc5cfebfa700165fb94f7d_8978	7073f0826909e86605b7f24ba93c455b_6860	4d8fdf303c55f8e586b180af2243e275_6886	2900b96dbbdb35d877a57143d080ad95_7000	K_pneumoniae_3_00702
clpA		ATP-dependent Clp protease ATP-binding subunit ClpA	6	6	1	1	871				2276	2279	2278	9645baa8bb46fe9f9ffaa8fccfada4b3_6521	fb55d8fe7cfc5cfebfa700165fb94f7d_8957	7073f0826909e86605b7f24ba93c455b_6878	4d8fdf303c55f8e586b180af2243e275_6904	2900b96dbbdb35d877a57143d080ad95_7018	K_pneumoniae_3_00693
WP_002895876.1		ABC-F family ATPase	6	6	1	1	793				1592	1592	1592	9645baa8bb46fe9f9ffaa8fccfada4b3_6657	fb55d8fe7cfc5cfebfa700165fb94f7d_8833	7073f0826909e86605b7f24ba93c455b_7014	4d8fdf303c55f8e586b180af2243e275_7036	2900b96dbbdb35d877a57143d080ad95_7150	K_pneumoniae_3_00628
pal		peptidoglycan-associated lipoprotein Pal	6	6	1	1	719				521	524	523	9645baa8bb46fe9f9ffaa8fccfada4b3_6895	fb55d8fe7cfc5cfebfa700165fb94f7d_8663	7073f0826909e86605b7f24ba93c455b_7234	4d8fdf303c55f8e586b180af2243e275_7256	2900b96dbbdb35d877a57143d080ad95_7376	K_pneumoniae_3_00524
tolQ		Tol-Pal system protein TolQ	6	6	1	1	713				692	692	692	9645baa8bb46fe9f9ffaa8fccfada4b3_6903	fb55d8fe7cfc5cfebfa700165fb94f7d_8655	7073f0826909e86605b7f24ba93c455b_7242	4d8fdf303c55f8e586b180af2243e275_7264	2900b96dbbdb35d877a57143d080ad95_7384	K_pneumoniae_3_00520
sucD		succinate--CoA ligase subunit alpha	6	6	1	1	702				869	869	869	9645baa8bb46fe9f9ffaa8fccfada4b3_6915	fb55d8fe7cfc5cfebfa700165fb94f7d_8635	7073f0826909e86605b7f24ba93c455b_7254	4d8fdf303c55f8e586b180af2243e275_7276	2900b96dbbdb35d877a57143d080ad95_7396	K_pneumoniae_3_00514
sucC		ADP-forming succinate--CoA ligase subunit beta	6	6	1	1	701				1166	1166	1166	9645baa8bb46fe9f9ffaa8fccfada4b3_6917	fb55d8fe7cfc5cfebfa700165fb94f7d_8633	7073f0826909e86605b7f24ba93c455b_7256	4d8fdf303c55f8e586b180af2243e275_7278	2900b96dbbdb35d877a57143d080ad95_7398	K_pneumoniae_3_00513
sdhB		succinate dehydrogenase iron-sulfur subunit SdhB	6	6	1	1	696				716	716	716	9645baa8bb46fe9f9ffaa8fccfada4b3_6923	fb55d8fe7cfc5cfebfa700165fb94f7d_8627	7073f0826909e86605b7f24ba93c455b_7262	4d8fdf303c55f8e586b180af2243e275_7284	2900b96dbbdb35d877a57143d080ad95_7404	K_pneumoniae_3_00510
pgm		phosphoglucomutase (alpha-D-glucose-1,6-bisphosphate-dependent)	6	6	1	1	2999				1640	1640	1640	9645baa8bb46fe9f9ffaa8fccfada4b3_6969	fb55d8fe7cfc5cfebfa700165fb94f7d_8559	7073f0826909e86605b7f24ba93c455b_7308	4d8fdf303c55f8e586b180af2243e275_7330	2900b96dbbdb35d877a57143d080ad95_7450	K_pneumoniae_3_00488
fldA		flavodoxin FldA	6	6	1	1	3006				530	530	530	9645baa8bb46fe9f9ffaa8fccfada4b3_6977	fb55d8fe7cfc5cfebfa700165fb94f7d_8551	7073f0826909e86605b7f24ba93c455b_7316	4d8fdf303c55f8e586b180af2243e275_7338	2900b96dbbdb35d877a57143d080ad95_7458	K_pneumoniae_3_00484
fur		ferric iron uptake transcriptional regulator	6	6	1	1	3018				446	452	451	9645baa8bb46fe9f9ffaa8fccfada4b3_6979	fb55d8fe7cfc5cfebfa700165fb94f7d_8547	7073f0826909e86605b7f24ba93c455b_7318	4d8fdf303c55f8e586b180af2243e275_7340	2900b96dbbdb35d877a57143d080ad95_7460	K_pneumoniae_3_00483
asnB		asparagine synthase B	6	6	1	1	3036				1664	1664	1664	9645baa8bb46fe9f9ffaa8fccfada4b3_7001	fb55d8fe7cfc5cfebfa700165fb94f7d_8511	7073f0826909e86605b7f24ba93c455b_7340	4d8fdf303c55f8e586b180af2243e275_7362	2900b96dbbdb35d877a57143d080ad95_7482	K_pneumoniae_3_00472
miaB		tRNA (N6-isopentenyl adenosine(37)-C2)-methylthiotransferase MiaB	6	6	1	1	3039				1424	1424	1424	9645baa8bb46fe9f9ffaa8fccfada4b3_7026	fb55d8fe7cfc5cfebfa700165fb94f7d_8484	7073f0826909e86605b7f24ba93c455b_7365	4d8fdf303c55f8e586b180af2243e275_7387	2900b96dbbdb35d877a57143d080ad95_7507	K_pneumoniae_3_00463
WP_004176871.1		PhoH family protein	6	6	1	1	3041				1040	1046	1045	9645baa8bb46fe9f9ffaa8fccfada4b3_7028	fb55d8fe7cfc5cfebfa700165fb94f7d_8482	7073f0826909e86605b7f24ba93c455b_7367	4d8fdf303c55f8e586b180af2243e275_7389	2900b96dbbdb35d877a57143d080ad95_7509	K_pneumoniae_3_00462
leuS		leucine--tRNA ligase	6	6	1	1	3056				2582	2582	2582	9645baa8bb46fe9f9ffaa8fccfada4b3_7050	fb55d8fe7cfc5cfebfa700165fb94f7d_8450	7073f0826909e86605b7f24ba93c455b_7389	4d8fdf303c55f8e586b180af2243e275_7411	2900b96dbbdb35d877a57143d080ad95_7531	K_pneumoniae_3_00451
mrdB		peptidoglycan glycosyltransferase MrdB	6	6	1	1	3065				1112	1112	1112	9645baa8bb46fe9f9ffaa8fccfada4b3_7066	fb55d8fe7cfc5cfebfa700165fb94f7d_8434	7073f0826909e86605b7f24ba93c455b_7405	4d8fdf303c55f8e586b180af2243e275_7427	2900b96dbbdb35d877a57143d080ad95_7547	K_pneumoniae_3_00443
ybeD		DUF493 family protein YbeD	6	6	1	1	3068				263	263	263	9645baa8bb46fe9f9ffaa8fccfada4b3_7072	fb55d8fe7cfc5cfebfa700165fb94f7d_8428	7073f0826909e86605b7f24ba93c455b_7411	4d8fdf303c55f8e586b180af2243e275_7433	2900b96dbbdb35d877a57143d080ad95_7553	K_pneumoniae_3_00440
lipA		lipoyl synthase	6	6	1	1	3071				965	965	965	9645baa8bb46fe9f9ffaa8fccfada4b3_7078	fb55d8fe7cfc5cfebfa700165fb94f7d_8422	7073f0826909e86605b7f24ba93c455b_7417	4d8fdf303c55f8e586b180af2243e275_7439	2900b96dbbdb35d877a57143d080ad95_7559	K_pneumoniae_3_00437
secA		preprotein translocase subunit SecA	6	11	1.84	1	3433				668	2705	1779	9645baa8bb46fe9f9ffaa8fccfada4b3_3508 9645baa8bb46fe9f9ffaa8fccfada4b3_8283	fb55d8fe7cfc5cfebfa700165fb94f7d_7339	7073f0826909e86605b7f24ba93c455b_3561 7073f0826909e86605b7f24ba93c455b_8593	4d8fdf303c55f8e586b180af2243e275_3765 4d8fdf303c55f8e586b180af2243e275_8771	2900b96dbbdb35d877a57143d080ad95_3673 2900b96dbbdb35d877a57143d080ad95_8934	K_pneumoniae_3_01243 K_pneumoniae_3_03274
betT		choline BCCT transporter BetT	6	6	1	1	7560				2033	2033	2033	9645baa8bb46fe9f9ffaa8fccfada4b3_7232	fb55d8fe7cfc5cfebfa700165fb94f7d_7857	7073f0826909e86605b7f24ba93c455b_7571	4d8fdf303c55f8e586b180af2243e275_7596	2900b96dbbdb35d877a57143d080ad95_7733	K_pneumoniae_3_00361
icd		NADP-dependent isocitrate dehydrogenase	6	13	2.17	1	2330				152	1250	664	9645baa8bb46fe9f9ffaa8fccfada4b3_6046 9645baa8bb46fe9f9ffaa8fccfada4b3_6058	fb55d8fe7cfc5cfebfa700165fb94f7d_9422 fb55d8fe7cfc5cfebfa700165fb94f7d_9544	7073f0826909e86605b7f24ba93c455b_6232 7073f0826909e86605b7f24ba93c455b_6386	4d8fdf303c55f8e586b180af2243e275_6379 4d8fdf303c55f8e586b180af2243e275_6431	2900b96dbbdb35d877a57143d080ad95_6448 2900b96dbbdb35d877a57143d080ad95_6564	K_pneumoniae_3_03151 K_pneumoniae_3_03045 K_pneumoniae_3_03092
cysS		cysteine--tRNA ligase	6	6	1	1	398				1385	1385	1385	9645baa8bb46fe9f9ffaa8fccfada4b3_7477	fb55d8fe7cfc5cfebfa700165fb94f7d_8257	7073f0826909e86605b7f24ba93c455b_7781	4d8fdf303c55f8e586b180af2243e275_7957	2900b96dbbdb35d877a57143d080ad95_8110	K_pneumoniae_3_00261
ppiB		peptidylprolyl isomerase B	6	6	1	1	397				494	494	494	9645baa8bb46fe9f9ffaa8fccfada4b3_7479	fb55d8fe7cfc5cfebfa700165fb94f7d_8255	7073f0826909e86605b7f24ba93c455b_7783	4d8fdf303c55f8e586b180af2243e275_7959	2900b96dbbdb35d877a57143d080ad95_8112	K_pneumoniae_3_00260
adk		adenylate kinase	6	6	1	1	344				644	644	644	9645baa8bb46fe9f9ffaa8fccfada4b3_7531	fb55d8fe7cfc5cfebfa700165fb94f7d_8147	7073f0826909e86605b7f24ba93c455b_7835	4d8fdf303c55f8e586b180af2243e275_8011	2900b96dbbdb35d877a57143d080ad95_8164	K_pneumoniae_3_00235
recR		recombination mediator RecR	6	6	1	1	337				605	605	605	9645baa8bb46fe9f9ffaa8fccfada4b3_7535	fb55d8fe7cfc5cfebfa700165fb94f7d_8143	7073f0826909e86605b7f24ba93c455b_7839	4d8fdf303c55f8e586b180af2243e275_8015	2900b96dbbdb35d877a57143d080ad95_8168	K_pneumoniae_3_00233
hha		hemolysin expression modulator Hha	6	6	1	1	321				218	218	218	9645baa8bb46fe9f9ffaa8fccfada4b3_7562	fb55d8fe7cfc5cfebfa700165fb94f7d_8118	7073f0826909e86605b7f24ba93c455b_7866	4d8fdf303c55f8e586b180af2243e275_8042	2900b96dbbdb35d877a57143d080ad95_8195	K_pneumoniae_3_00220
glnK		P-II family nitrogen regulator	6	6	1	1	312				338	338	338	9645baa8bb46fe9f9ffaa8fccfada4b3_7623	fb55d8fe7cfc5cfebfa700165fb94f7d_8097	7073f0826909e86605b7f24ba93c455b_7927	4d8fdf303c55f8e586b180af2243e275_8103	2900b96dbbdb35d877a57143d080ad95_8256	K_pneumoniae_3_00192
hupB		DNA-binding protein HU-beta	6	6	1	1	302				272	272	272	9645baa8bb46fe9f9ffaa8fccfada4b3_7645	fb55d8fe7cfc5cfebfa700165fb94f7d_8077	7073f0826909e86605b7f24ba93c455b_7949	4d8fdf303c55f8e586b180af2243e275_8125	2900b96dbbdb35d877a57143d080ad95_8278	K_pneumoniae_3_00181
yajC		preprotein translocase subunit YajC	6	6	1	1	252				332	332	332	9645baa8bb46fe9f9ffaa8fccfada4b3_7733	fb55d8fe7cfc5cfebfa700165fb94f7d_8011	7073f0826909e86605b7f24ba93c455b_8037	4d8fdf303c55f8e586b180af2243e275_8213	2900b96dbbdb35d877a57143d080ad95_8366	K_pneumoniae_3_00137
tgt		tRNA guanosine(34) transglycosylase Tgt	6	6	1	1	7482				1127	1127	1127	9645baa8bb46fe9f9ffaa8fccfada4b3_7735	fb55d8fe7cfc5cfebfa700165fb94f7d_8009	7073f0826909e86605b7f24ba93c455b_8039	4d8fdf303c55f8e586b180af2243e275_8215	2900b96dbbdb35d877a57143d080ad95_8368	K_pneumoniae_3_00136
phoB		phosphate response regulator transcription factor PhoB	6	6	1	1	7492				689	689	689	9645baa8bb46fe9f9ffaa8fccfada4b3_7773	fb55d8fe7cfc5cfebfa700165fb94f7d_7995	7073f0826909e86605b7f24ba93c455b_8077	4d8fdf303c55f8e586b180af2243e275_8253	2900b96dbbdb35d877a57143d080ad95_8406	K_pneumoniae_3_00118
ecpD		fimbrial adhesin EcpD	6	6	1	1	7598				1643	1643	1643	9645baa8bb46fe9f9ffaa8fccfada4b3_7871	fb55d8fe7cfc5cfebfa700165fb94f7d_7789	7073f0826909e86605b7f24ba93c455b_8175	4d8fdf303c55f8e586b180af2243e275_8351	2900b96dbbdb35d877a57143d080ad95_8504	K_pneumoniae_3_00071
ecpA		common pilus major fimbrillin subunit EcpA	6	6	1	1	7595				587	587	587	9645baa8bb46fe9f9ffaa8fccfada4b3_7877	fb55d8fe7cfc5cfebfa700165fb94f7d_7795	7073f0826909e86605b7f24ba93c455b_8181	4d8fdf303c55f8e586b180af2243e275_8357	2900b96dbbdb35d877a57143d080ad95_8510	K_pneumoniae_3_00068
gpt		xanthine phosphoribosyltransferase	6	6	1	1	7633				458	458	458	9645baa8bb46fe9f9ffaa8fccfada4b3_7970	fb55d8fe7cfc5cfebfa700165fb94f7d_7742	7073f0826909e86605b7f24ba93c455b_8280	4d8fdf303c55f8e586b180af2243e275_8458	2900b96dbbdb35d877a57143d080ad95_8619	K_pneumoniae_3_00033
WP_002889448.1		methionine ABC transporter permease MetI	6	6	1	1	7390				653	653	653	9645baa8bb46fe9f9ffaa8fccfada4b3_8053	fb55d8fe7cfc5cfebfa700165fb94f7d_7600	7073f0826909e86605b7f24ba93c455b_8363	4d8fdf303c55f8e586b180af2243e275_8541	2900b96dbbdb35d877a57143d080ad95_8702	K_pneumoniae_3_03164
metQ		methionine ABC transporter substrate-binding lipoprotein MetQ	6	6	1	1	7389				815	815	815	9645baa8bb46fe9f9ffaa8fccfada4b3_8055	fb55d8fe7cfc5cfebfa700165fb94f7d_7598	7073f0826909e86605b7f24ba93c455b_8365	4d8fdf303c55f8e586b180af2243e275_8543	2900b96dbbdb35d877a57143d080ad95_8704	K_pneumoniae_3_03165
accA		acetyl-CoA carboxylase carboxyl transferase subunit alpha	6	6	1	1	7376				959	959	959	9645baa8bb46fe9f9ffaa8fccfada4b3_8081	fb55d8fe7cfc5cfebfa700165fb94f7d_7572	7073f0826909e86605b7f24ba93c455b_8391	4d8fdf303c55f8e586b180af2243e275_8569	2900b96dbbdb35d877a57143d080ad95_8730	K_pneumoniae_3_03178
dnaE		DNA polymerase III subunit alpha	6	6	1	1	7375				3482	3482	3482	9645baa8bb46fe9f9ffaa8fccfada4b3_8083	fb55d8fe7cfc5cfebfa700165fb94f7d_7570	7073f0826909e86605b7f24ba93c455b_8393	4d8fdf303c55f8e586b180af2243e275_8571	2900b96dbbdb35d877a57143d080ad95_8732	K_pneumoniae_3_03179
fabZ		3-hydroxyacyl-ACP dehydratase FabZ	6	6	1	1	7371				455	455	455	9645baa8bb46fe9f9ffaa8fccfada4b3_8091	fb55d8fe7cfc5cfebfa700165fb94f7d_7562	7073f0826909e86605b7f24ba93c455b_8401	4d8fdf303c55f8e586b180af2243e275_8579	2900b96dbbdb35d877a57143d080ad95_8740	K_pneumoniae_3_03183
frr		ribosome recycling factor	6	6	1	1	7363				557	557	557	9645baa8bb46fe9f9ffaa8fccfada4b3_8107	fb55d8fe7cfc5cfebfa700165fb94f7d_7546	7073f0826909e86605b7f24ba93c455b_8417	4d8fdf303c55f8e586b180af2243e275_8595	2900b96dbbdb35d877a57143d080ad95_8756	K_pneumoniae_3_03191
tsf		translation elongation factor Ts	6	6	1	1	7358				851	851	851	9645baa8bb46fe9f9ffaa8fccfada4b3_8111	fb55d8fe7cfc5cfebfa700165fb94f7d_7542	7073f0826909e86605b7f24ba93c455b_8421	4d8fdf303c55f8e586b180af2243e275_8599	2900b96dbbdb35d877a57143d080ad95_8760	K_pneumoniae_3_03193
map		type I methionyl aminopeptidase	6	6	1	1	3299				794	794	794	9645baa8bb46fe9f9ffaa8fccfada4b3_8115	fb55d8fe7cfc5cfebfa700165fb94f7d_7538	7073f0826909e86605b7f24ba93c455b_8425	4d8fdf303c55f8e586b180af2243e275_8603	2900b96dbbdb35d877a57143d080ad95_8764	K_pneumoniae_3_03195
dapD		2,3,4,5-tetrahydropyridine-2,6-dicarboxylate N-succinyltransferase	6	6	1	1	3301				824	824	824	9645baa8bb46fe9f9ffaa8fccfada4b3_8119	fb55d8fe7cfc5cfebfa700165fb94f7d_7534	7073f0826909e86605b7f24ba93c455b_8429	4d8fdf303c55f8e586b180af2243e275_8607	2900b96dbbdb35d877a57143d080ad95_8768	K_pneumoniae_3_03197
WP_002889292.1		DUF3461 family protein	6	6	1	1	3302				386	386	386	9645baa8bb46fe9f9ffaa8fccfada4b3_8121	fb55d8fe7cfc5cfebfa700165fb94f7d_7532	7073f0826909e86605b7f24ba93c455b_8431	4d8fdf303c55f8e586b180af2243e275_8609	2900b96dbbdb35d877a57143d080ad95_8770	K_pneumoniae_3_03198
erpA		iron-sulfur cluster insertion protein ErpA	6	6	1	1	3315				344	344	344	9645baa8bb46fe9f9ffaa8fccfada4b3_8135	fb55d8fe7cfc5cfebfa700165fb94f7d_7518	7073f0826909e86605b7f24ba93c455b_8445	4d8fdf303c55f8e586b180af2243e275_8623	2900b96dbbdb35d877a57143d080ad95_8784	K_pneumoniae_3_03205
can		carbonate dehydratase	6	6	1	1	3385				662	662	662	9645baa8bb46fe9f9ffaa8fccfada4b3_8215	fb55d8fe7cfc5cfebfa700165fb94f7d_7444	7073f0826909e86605b7f24ba93c455b_8525	4d8fdf303c55f8e586b180af2243e275_8703	2900b96dbbdb35d877a57143d080ad95_8864	K_pneumoniae_3_03242
speD		adenosylmethionine decarboxylase	6	6	1	1	3391				794	794	794	9645baa8bb46fe9f9ffaa8fccfada4b3_8235	fb55d8fe7cfc5cfebfa700165fb94f7d_7432	7073f0826909e86605b7f24ba93c455b_8545	4d8fdf303c55f8e586b180af2243e275_8723	2900b96dbbdb35d877a57143d080ad95_8886	K_pneumoniae_3_03250
acnB		bifunctional aconitate hydratase 2/2-methylisocitrate dehydratase	6	6	1	1	3393				2597	2597	2597	9645baa8bb46fe9f9ffaa8fccfada4b3_8239	fb55d8fe7cfc5cfebfa700165fb94f7d_7428	7073f0826909e86605b7f24ba93c455b_8549	4d8fdf303c55f8e586b180af2243e275_8727	2900b96dbbdb35d877a57143d080ad95_8890	K_pneumoniae_3_03252
lpdA		dihydrolipoyl dehydrogenase	6	6	1	1	3398				1424	1424	1424	9645baa8bb46fe9f9ffaa8fccfada4b3_8247	fb55d8fe7cfc5cfebfa700165fb94f7d_7424	7073f0826909e86605b7f24ba93c455b_8557	4d8fdf303c55f8e586b180af2243e275_8735	2900b96dbbdb35d877a57143d080ad95_8898	K_pneumoniae_3_03256
lpxC		UDP-3-O-acyl-N-acetylglucosamine deacetylase	6	6	1	1	3435				917	917	917	9645baa8bb46fe9f9ffaa8fccfada4b3_8287	fb55d8fe7cfc5cfebfa700165fb94f7d_7335	7073f0826909e86605b7f24ba93c455b_8597	4d8fdf303c55f8e586b180af2243e275_8775	2900b96dbbdb35d877a57143d080ad95_8938	K_pneumoniae_3_03276
mraY		phospho-N-acetylmuramoyl-pentapeptide-transferase	6	6	1	1	3444				1082	1082	1082	9645baa8bb46fe9f9ffaa8fccfada4b3_8305	fb55d8fe7cfc5cfebfa700165fb94f7d_7317	7073f0826909e86605b7f24ba93c455b_8615	4d8fdf303c55f8e586b180af2243e275_8793	2900b96dbbdb35d877a57143d080ad95_8956	K_pneumoniae_3_03285
ftsL		cell division protein FtsL	6	6	1	1	3448				365	365	365	9645baa8bb46fe9f9ffaa8fccfada4b3_8313	fb55d8fe7cfc5cfebfa700165fb94f7d_7309	7073f0826909e86605b7f24ba93c455b_8623	4d8fdf303c55f8e586b180af2243e275_8801	2900b96dbbdb35d877a57143d080ad95_8964	K_pneumoniae_3_03289
cra		catabolite repressor/activator	6	6	1	1	3451				1004	1004	1004	9645baa8bb46fe9f9ffaa8fccfada4b3_8319	fb55d8fe7cfc5cfebfa700165fb94f7d_7303	7073f0826909e86605b7f24ba93c455b_8629	4d8fdf303c55f8e586b180af2243e275_8807	2900b96dbbdb35d877a57143d080ad95_8970	K_pneumoniae_3_03292
ilvN		acetolactate synthase small subunit	6	6	1	1	3452				491	491	491	9645baa8bb46fe9f9ffaa8fccfada4b3_8321	fb55d8fe7cfc5cfebfa700165fb94f7d_7299	7073f0826909e86605b7f24ba93c455b_8631	4d8fdf303c55f8e586b180af2243e275_8809	2900b96dbbdb35d877a57143d080ad95_8972	K_pneumoniae_3_03293
leuC		3-isopropylmalate dehydratase large subunit	6	6	1	1	3501				1400	1400	1400	9645baa8bb46fe9f9ffaa8fccfada4b3_8333	fb55d8fe7cfc5cfebfa700165fb94f7d_7285	7073f0826909e86605b7f24ba93c455b_8643	4d8fdf303c55f8e586b180af2243e275_8821	2900b96dbbdb35d877a57143d080ad95_8984	K_pneumoniae_3_03298
carB		carbamoyl-phosphate synthase large subunit	6	6	1	1	3569				3221	3224	3223	9645baa8bb46fe9f9ffaa8fccfada4b3_8408	fb55d8fe7cfc5cfebfa700165fb94f7d_7197	7073f0826909e86605b7f24ba93c455b_8718	4d8fdf303c55f8e586b180af2243e275_8896	2900b96dbbdb35d877a57143d080ad95_9059	K_pneumoniae_3_03335
dnaJ		molecular chaperone DnaJ	6	6	1	1	4030				1130	1133	1132	9645baa8bb46fe9f9ffaa8fccfada4b3_8462	fb55d8fe7cfc5cfebfa700165fb94f7d_7155	7073f0826909e86605b7f24ba93c455b_8750	4d8fdf303c55f8e586b180af2243e275_8948	2900b96dbbdb35d877a57143d080ad95_9111	K_pneumoniae_3_03361
dnaK		molecular chaperone DnaK	6	6	1	1	4029				1916	1916	1916	9645baa8bb46fe9f9ffaa8fccfada4b3_8464	fb55d8fe7cfc5cfebfa700165fb94f7d_7153	7073f0826909e86605b7f24ba93c455b_8752	4d8fdf303c55f8e586b180af2243e275_8950	2900b96dbbdb35d877a57143d080ad95_9113	K_pneumoniae_3_03362
arcA		two-component system response regulator ArcA	6	6	1	1	2705				716	716	716	9645baa8bb46fe9f9ffaa8fccfada4b3_8497	fb55d8fe7cfc5cfebfa700165fb94f7d_7122	7073f0826909e86605b7f24ba93c455b_8785	4d8fdf303c55f8e586b180af2243e275_8983	2900b96dbbdb35d877a57143d080ad95_9146	K_pneumoniae_3_03376
ettA		energy-dependent translational throttle protein EttA	6	6	1	1	2715				1667	1667	1667	9645baa8bb46fe9f9ffaa8fccfada4b3_8517	fb55d8fe7cfc5cfebfa700165fb94f7d_7102	7073f0826909e86605b7f24ba93c455b_8805	4d8fdf303c55f8e586b180af2243e275_9003	2900b96dbbdb35d877a57143d080ad95_9166	K_pneumoniae_3_03386
radA		DNA repair protein RadA	6	6	1	1	2719				1382	1382	1382	9645baa8bb46fe9f9ffaa8fccfada4b3_8521	fb55d8fe7cfc5cfebfa700165fb94f7d_7098	7073f0826909e86605b7f24ba93c455b_8809	4d8fdf303c55f8e586b180af2243e275_9007	2900b96dbbdb35d877a57143d080ad95_9170	K_pneumoniae_3_03388
deoD		purine-nucleoside phosphorylase	6	6	1	1	2726				719	719	719	9645baa8bb46fe9f9ffaa8fccfada4b3_8529	fb55d8fe7cfc5cfebfa700165fb94f7d_7088	7073f0826909e86605b7f24ba93c455b_8817	4d8fdf303c55f8e586b180af2243e275_9037	2900b96dbbdb35d877a57143d080ad95_9178	K_pneumoniae_3_03392
deoB		phosphopentomutase	6	6	1	1	2727				1223	1223	1223	9645baa8bb46fe9f9ffaa8fccfada4b3_8531	fb55d8fe7cfc5cfebfa700165fb94f7d_7086	7073f0826909e86605b7f24ba93c455b_8819	4d8fdf303c55f8e586b180af2243e275_9039	2900b96dbbdb35d877a57143d080ad95_9180	K_pneumoniae_3_03393
deoA		thymidine phosphorylase	6	6	1	1	2728				1322	1322	1322	9645baa8bb46fe9f9ffaa8fccfada4b3_8533	fb55d8fe7cfc5cfebfa700165fb94f7d_7084	7073f0826909e86605b7f24ba93c455b_8821	4d8fdf303c55f8e586b180af2243e275_9041	2900b96dbbdb35d877a57143d080ad95_9182	K_pneumoniae_3_03394
WP_002887716.1		DUF1328 domain-containing protein	6	6	1	1	2735				161	161	161	9645baa8bb46fe9f9ffaa8fccfada4b3_8543	fb55d8fe7cfc5cfebfa700165fb94f7d_7072	7073f0826909e86605b7f24ba93c455b_8831	4d8fdf303c55f8e586b180af2243e275_9051	2900b96dbbdb35d877a57143d080ad95_9192	K_pneumoniae_3_03399
prfC		peptide chain release factor 3	6	6	1	1	2864				1589	1589	1589	9645baa8bb46fe9f9ffaa8fccfada4b3_8547	fb55d8fe7cfc5cfebfa700165fb94f7d_7068	7073f0826909e86605b7f24ba93c455b_8835	4d8fdf303c55f8e586b180af2243e275_9055	2900b96dbbdb35d877a57143d080ad95_9196	K_pneumoniae_3_03401
pepA		leucyl aminopeptidase	6	6	1	1	4799				1511	1511	1511	9645baa8bb46fe9f9ffaa8fccfada4b3_8908	fb55d8fe7cfc5cfebfa700165fb94f7d_6741	7073f0826909e86605b7f24ba93c455b_9195	4d8fdf303c55f8e586b180af2243e275_9428	2900b96dbbdb35d877a57143d080ad95_9510	K_pneumoniae_3_04384
valS		valine--tRNA ligase	6	6	1	1	9989				2855	2855	2855	9645baa8bb46fe9f9ffaa8fccfada4b3_8912	fb55d8fe7cfc5cfebfa700165fb94f7d_6737	7073f0826909e86605b7f24ba93c455b_9199	4d8fdf303c55f8e586b180af2243e275_9432	2900b96dbbdb35d877a57143d080ad95_9514	K_pneumoniae_3_04382
fbp		class 1 fructose-bisphosphatase	6	6	1	1	10013				998	998	998	9645baa8bb46fe9f9ffaa8fccfada4b3_8990	fb55d8fe7cfc5cfebfa700165fb94f7d_6687	7073f0826909e86605b7f24ba93c455b_9281	4d8fdf303c55f8e586b180af2243e275_9514	2900b96dbbdb35d877a57143d080ad95_9596	K_pneumoniae_3_04573
ppa		inorganic diphosphatase	6	6	1	1	10019				530	530	530	9645baa8bb46fe9f9ffaa8fccfada4b3_9000	fb55d8fe7cfc5cfebfa700165fb94f7d_6677	7073f0826909e86605b7f24ba93c455b_9291	4d8fdf303c55f8e586b180af2243e275_9524	2900b96dbbdb35d877a57143d080ad95_9606	K_pneumoniae_3_04578
ulaB		PTS ascorbate transporter subunit IIB	6	6	1	1	10649				305	305	305	9645baa8bb46fe9f9ffaa8fccfada4b3_9066	fb55d8fe7cfc5cfebfa700165fb94f7d_6611	7073f0826909e86605b7f24ba93c455b_9355	4d8fdf303c55f8e586b180af2243e275_9588	2900b96dbbdb35d877a57143d080ad95_9672	K_pneumoniae_3_04609
ulaA		PTS ascorbate transporter subunit IIC	6	6	1	1	10650				1397	1400	1399	9645baa8bb46fe9f9ffaa8fccfada4b3_9068	fb55d8fe7cfc5cfebfa700165fb94f7d_6609	7073f0826909e86605b7f24ba93c455b_9357	4d8fdf303c55f8e586b180af2243e275_9590	2900b96dbbdb35d877a57143d080ad95_9674	K_pneumoniae_3_04610
ulaG		L-ascorbate 6-phosphate lactonase	6	6	1	1	10651				1028	1064	1058	9645baa8bb46fe9f9ffaa8fccfada4b3_9070	fb55d8fe7cfc5cfebfa700165fb94f7d_6607	7073f0826909e86605b7f24ba93c455b_9359	4d8fdf303c55f8e586b180af2243e275_9592	2900b96dbbdb35d877a57143d080ad95_9676	K_pneumoniae_3_04611
rlmB		23S rRNA (guanosine(2251)-2'-O)-methyltransferase RlmB	6	6	1	1	10671				731	731	731	9645baa8bb46fe9f9ffaa8fccfada4b3_9082	fb55d8fe7cfc5cfebfa700165fb94f7d_6575	7073f0826909e86605b7f24ba93c455b_9371	4d8fdf303c55f8e586b180af2243e275_9604	2900b96dbbdb35d877a57143d080ad95_9688	K_pneumoniae_3_04617
WP_002885665.1		adenylosuccinate synthase	6	6	1	1	10687				1298	1298	1298	9645baa8bb46fe9f9ffaa8fccfada4b3_9088	fb55d8fe7cfc5cfebfa700165fb94f7d_6569	7073f0826909e86605b7f24ba93c455b_9377	4d8fdf303c55f8e586b180af2243e275_9610	2900b96dbbdb35d877a57143d080ad95_9694	K_pneumoniae_3_04620
frdA		fumarate reductase (quinol) flavoprotein subunit	6	6	1	1	10714				1790	1808	1793	9645baa8bb46fe9f9ffaa8fccfada4b3_9137	fb55d8fe7cfc5cfebfa700165fb94f7d_6520	7073f0826909e86605b7f24ba93c455b_9426	4d8fdf303c55f8e586b180af2243e275_9659	2900b96dbbdb35d877a57143d080ad95_9743	K_pneumoniae_3_04643
groL		chaperonin GroEL	6	6	1	1	10748				1646	1646	1646	9645baa8bb46fe9f9ffaa8fccfada4b3_9181	fb55d8fe7cfc5cfebfa700165fb94f7d_6494	7073f0826909e86605b7f24ba93c455b_9466	4d8fdf303c55f8e586b180af2243e275_9699	2900b96dbbdb35d877a57143d080ad95_9783	K_pneumoniae_3_04663
uvrA		excinuclease ABC subunit UvrA	6	6	1	1	6893				2822	2825	2824	9645baa8bb46fe9f9ffaa8fccfada4b3_9358	fb55d8fe7cfc5cfebfa700165fb94f7d_6163	7073f0826909e86605b7f24ba93c455b_9643	4d8fdf303c55f8e586b180af2243e275_9876	2900b96dbbdb35d877a57143d080ad95_9962	K_pneumoniae_3_04506
malE		maltose/maltodextrin ABC transporter substrate-binding protein MalE	6	6	1	1	7768				1190	1190	1190	9645baa8bb46fe9f9ffaa8fccfada4b3_9404	fb55d8fe7cfc5cfebfa700165fb94f7d_6088	7073f0826909e86605b7f24ba93c455b_9689	4d8fdf303c55f8e586b180af2243e275_9922	2900b96dbbdb35d877a57143d080ad95_10008	K_pneumoniae_3_04484
pgi		glucose-6-phosphate isomerase	6	6	1	1	7758				1649	1649	1649	9645baa8bb46fe9f9ffaa8fccfada4b3_9424	fb55d8fe7cfc5cfebfa700165fb94f7d_6070	7073f0826909e86605b7f24ba93c455b_9709	4d8fdf303c55f8e586b180af2243e275_9942	2900b96dbbdb35d877a57143d080ad95_10028	K_pneumoniae_3_04474
purH		bifunctional phosphoribosylaminoimidazolecarboxamide formyltransferase/IMP cyclohydrolase	6	6	1	1	7736				1589	1589	1589	9645baa8bb46fe9f9ffaa8fccfada4b3_9478	fb55d8fe7cfc5cfebfa700165fb94f7d_6013	7073f0826909e86605b7f24ba93c455b_9750	4d8fdf303c55f8e586b180af2243e275_9982	2900b96dbbdb35d877a57143d080ad95_10068	K_pneumoniae_3_04956
hupA		DNA-binding protein HU-alpha	6	6	1	1	7728				272	272	272	9645baa8bb46fe9f9ffaa8fccfada4b3_9490	fb55d8fe7cfc5cfebfa700165fb94f7d_6001	7073f0826909e86605b7f24ba93c455b_9762	4d8fdf303c55f8e586b180af2243e275_9994	2900b96dbbdb35d877a57143d080ad95_10080	K_pneumoniae_3_04950
hemE		uroporphyrinogen decarboxylase	6	6	1	1	7722				1064	1064	1064	9645baa8bb46fe9f9ffaa8fccfada4b3_9496	fb55d8fe7cfc5cfebfa700165fb94f7d_5995	7073f0826909e86605b7f24ba93c455b_9768	4d8fdf303c55f8e586b180af2243e275_10000	2900b96dbbdb35d877a57143d080ad95_10086	K_pneumoniae_3_04947
rpoC		DNA-directed RNA polymerase subunit beta'	6	6	1	1	7712				4223	4223	4223	9645baa8bb46fe9f9ffaa8fccfada4b3_9523	fb55d8fe7cfc5cfebfa700165fb94f7d_5976	7073f0826909e86605b7f24ba93c455b_9795	4d8fdf303c55f8e586b180af2243e275_10027	2900b96dbbdb35d877a57143d080ad95_10113	K_pneumoniae_3_04934
rplL		50S ribosomal protein L7/L12	6	6	1	1	7710				365	365	365	9645baa8bb46fe9f9ffaa8fccfada4b3_9527	fb55d8fe7cfc5cfebfa700165fb94f7d_5972	7073f0826909e86605b7f24ba93c455b_9799	4d8fdf303c55f8e586b180af2243e275_10031	2900b96dbbdb35d877a57143d080ad95_10117	K_pneumoniae_3_04932
trkH		Trk system potassium transporter TrkH	6	6	1	1	10337				1451	1451	1451	9645baa8bb46fe9f9ffaa8fccfada4b3_9576	fb55d8fe7cfc5cfebfa700165fb94f7d_5684	7073f0826909e86605b7f24ba93c455b_9848	4d8fdf303c55f8e586b180af2243e275_10080	2900b96dbbdb35d877a57143d080ad95_10166	K_pneumoniae_3_04866
ubiD		4-hydroxy-3-polyprenylbenzoate decarboxylase	6	6	1	1	10331				1475	1493	1478	9645baa8bb46fe9f9ffaa8fccfada4b3_9588	fb55d8fe7cfc5cfebfa700165fb94f7d_5672	7073f0826909e86605b7f24ba93c455b_9860	4d8fdf303c55f8e586b180af2243e275_10092	2900b96dbbdb35d877a57143d080ad95_10178	K_pneumoniae_3_04860
udp		uridine phosphorylase	6	6	1	1	10311				761	764	761	9645baa8bb46fe9f9ffaa8fccfada4b3_9608	fb55d8fe7cfc5cfebfa700165fb94f7d_5640	7073f0826909e86605b7f24ba93c455b_9880	4d8fdf303c55f8e586b180af2243e275_10112	2900b96dbbdb35d877a57143d080ad95_10198	K_pneumoniae_3_04850
uvrD		DNA helicase II	6	6	1	1	10279				2162	2162	2162	9645baa8bb46fe9f9ffaa8fccfada4b3_9690	fb55d8fe7cfc5cfebfa700165fb94f7d_5576	7073f0826909e86605b7f24ba93c455b_9910	4d8fdf303c55f8e586b180af2243e275_10142	2900b96dbbdb35d877a57143d080ad95_10238	K_pneumoniae_3_04829
cyaY		iron donor protein CyaY	6	6	1	1	10267				320	320	320	9645baa8bb46fe9f9ffaa8fccfada4b3_9702	fb55d8fe7cfc5cfebfa700165fb94f7d_5562	7073f0826909e86605b7f24ba93c455b_9922	4d8fdf303c55f8e586b180af2243e275_10154	2900b96dbbdb35d877a57143d080ad95_10250	K_pneumoniae_3_04823
trxA		thioredoxin TrxA	6	6	1	1	10238				329	329	329	9645baa8bb46fe9f9ffaa8fccfada4b3_9754	fb55d8fe7cfc5cfebfa700165fb94f7d_5502	7073f0826909e86605b7f24ba93c455b_9974	4d8fdf303c55f8e586b180af2243e275_10206	2900b96dbbdb35d877a57143d080ad95_10302	K_pneumoniae_3_04799
rhlB		ATP-dependent RNA helicase RhlB	6	6	1	1	10237				1265	1265	1265	9645baa8bb46fe9f9ffaa8fccfada4b3_9756	fb55d8fe7cfc5cfebfa700165fb94f7d_5500	7073f0826909e86605b7f24ba93c455b_9976	4d8fdf303c55f8e586b180af2243e275_10208	2900b96dbbdb35d877a57143d080ad95_10304	K_pneumoniae_3_04798
ppiC		peptidylprolyl isomerase PpiC	6	6	1	1	10233				281	281	281	9645baa8bb46fe9f9ffaa8fccfada4b3_9770	fb55d8fe7cfc5cfebfa700165fb94f7d_5494	7073f0826909e86605b7f24ba93c455b_9990	4d8fdf303c55f8e586b180af2243e275_10222	2900b96dbbdb35d877a57143d080ad95_10318	K_pneumoniae_3_04791
ilvA		threonine ammonia-lyase, biosynthetic	6	6	1	1	10229				1544	1544	1544	9645baa8bb46fe9f9ffaa8fccfada4b3_9776	fb55d8fe7cfc5cfebfa700165fb94f7d_5488	7073f0826909e86605b7f24ba93c455b_9996	4d8fdf303c55f8e586b180af2243e275_10228	2900b96dbbdb35d877a57143d080ad95_10324	K_pneumoniae_3_04788
ilvD		dihydroxy-acid dehydratase	6	6	1	1	8759				1850	1850	1850	9645baa8bb46fe9f9ffaa8fccfada4b3_9778	fb55d8fe7cfc5cfebfa700165fb94f7d_5486	7073f0826909e86605b7f24ba93c455b_9998	4d8fdf303c55f8e586b180af2243e275_10230	2900b96dbbdb35d877a57143d080ad95_10326	K_pneumoniae_3_04787
fabR		HTH-type transcriptional repressor FabR	6	6	1	1	10488				635	650	637	9645baa8bb46fe9f9ffaa8fccfada4b3_9826	fb55d8fe7cfc5cfebfa700165fb94f7d_5916	7073f0826909e86605b7f24ba93c455b_10044	4d8fdf303c55f8e586b180af2243e275_10276	2900b96dbbdb35d877a57143d080ad95_10372	K_pneumoniae_3_04774
oxyR		DNA-binding transcriptional regulator OxyR	6	6	1	1	10483				917	917	917	9645baa8bb46fe9f9ffaa8fccfada4b3_9830	fb55d8fe7cfc5cfebfa700165fb94f7d_5908	7073f0826909e86605b7f24ba93c455b_10048	4d8fdf303c55f8e586b180af2243e275_10280	2900b96dbbdb35d877a57143d080ad95_10376	K_pneumoniae_3_04772
metB		cystathionine gamma-synthase	6	6	1	1	10456				1160	1160	1160	9645baa8bb46fe9f9ffaa8fccfada4b3_9864	fb55d8fe7cfc5cfebfa700165fb94f7d_5862	7073f0826909e86605b7f24ba93c455b_10082	4d8fdf303c55f8e586b180af2243e275_10314	2900b96dbbdb35d877a57143d080ad95_10408	K_pneumoniae_3_04755
hslV		ATP-dependent protease subunit HslV	6	6	1	1	10436				530	530	530	9645baa8bb46fe9f9ffaa8fccfada4b3_9876	fb55d8fe7cfc5cfebfa700165fb94f7d_5848	7073f0826909e86605b7f24ba93c455b_10094	4d8fdf303c55f8e586b180af2243e275_10326	2900b96dbbdb35d877a57143d080ad95_10420	K_pneumoniae_3_04749
cpxR		envelope stress response regulator transcription factor CpxR	6	6	1	1	10413				698	698	698	9645baa8bb46fe9f9ffaa8fccfada4b3_9890	fb55d8fe7cfc5cfebfa700165fb94f7d_5810	7073f0826909e86605b7f24ba93c455b_10108	4d8fdf303c55f8e586b180af2243e275_10370	2900b96dbbdb35d877a57143d080ad95_10434	K_pneumoniae_3_04742
typA		ribosome-dependent GTPase TypA	6	6	1	1	10360				1823	1823	1823	9645baa8bb46fe9f9ffaa8fccfada4b3_9960	fb55d8fe7cfc5cfebfa700165fb94f7d_5732	7073f0826909e86605b7f24ba93c455b_10178	4d8fdf303c55f8e586b180af2243e275_10454	2900b96dbbdb35d877a57143d080ad95_10504	K_pneumoniae_3_04699
rbsC		ribose ABC transporter permease	6	6	1	1	8773				965	965	965	9645baa8bb46fe9f9ffaa8fccfada4b3_10012	fb55d8fe7cfc5cfebfa700165fb94f7d_5440	7073f0826909e86605b7f24ba93c455b_10230	4d8fdf303c55f8e586b180af2243e275_10506	2900b96dbbdb35d877a57143d080ad95_10556	K_pneumoniae_3_02287
rbsA		ribose ABC transporter ATP-binding protein RbsA	6	6	1	1	8774				1505	1505	1505	9645baa8bb46fe9f9ffaa8fccfada4b3_10014	fb55d8fe7cfc5cfebfa700165fb94f7d_5438	7073f0826909e86605b7f24ba93c455b_10232	4d8fdf303c55f8e586b180af2243e275_10508	2900b96dbbdb35d877a57143d080ad95_10558	K_pneumoniae_3_02288
mnmG		tRNA uridine-5-carboxymethylaminomethyl(34) synthesis enzyme MnmG	6	6	1	1	8729				1889	1889	1889	9645baa8bb46fe9f9ffaa8fccfada4b3_10030	fb55d8fe7cfc5cfebfa700165fb94f7d_5417	7073f0826909e86605b7f24ba93c455b_10248	4d8fdf303c55f8e586b180af2243e275_10524	2900b96dbbdb35d877a57143d080ad95_10574	K_pneumoniae_3_02296
atpG		F0F1 ATP synthase subunit gamma	6	6	1	1	8721				863	863	863	9645baa8bb46fe9f9ffaa8fccfada4b3_10046	fb55d8fe7cfc5cfebfa700165fb94f7d_5401	7073f0826909e86605b7f24ba93c455b_10264	4d8fdf303c55f8e586b180af2243e275_10540	2900b96dbbdb35d877a57143d080ad95_10590	K_pneumoniae_3_02304
atpC		F0F1 ATP synthase subunit epsilon	6	6	1	1	8719				419	419	419	9645baa8bb46fe9f9ffaa8fccfada4b3_10050	fb55d8fe7cfc5cfebfa700165fb94f7d_5397	7073f0826909e86605b7f24ba93c455b_10268	4d8fdf303c55f8e586b180af2243e275_10544	2900b96dbbdb35d877a57143d080ad95_10594	K_pneumoniae_3_02306
metG		methionine--tRNA ligase	6	6	1	1	5193				2033	2042	2034	9645baa8bb46fe9f9ffaa8fccfada4b3_3178	fb55d8fe7cfc5cfebfa700165fb94f7d_1921	7073f0826909e86605b7f24ba93c455b_3247	4d8fdf303c55f8e586b180af2243e275_3337	2900b96dbbdb35d877a57143d080ad95_3232	K_pneumoniae_3_01396
ftsH		ATP-dependent zinc metalloprotease FtsH	6	6	1	1	8230				1934	1943	1935	9645baa8bb46fe9f9ffaa8fccfada4b3_1097	fb55d8fe7cfc5cfebfa700165fb94f7d_4101	7073f0826909e86605b7f24ba93c455b_1073	4d8fdf303c55f8e586b180af2243e275_1084	2900b96dbbdb35d877a57143d080ad95_1070	K_pneumoniae_3_01858
slyD		peptidylprolyl isomerase	6	6	1	1	10559				587	593	588	9645baa8bb46fe9f9ffaa8fccfada4b3_792	fb55d8fe7cfc5cfebfa700165fb94f7d_4448	7073f0826909e86605b7f24ba93c455b_768	4d8fdf303c55f8e586b180af2243e275_773	2900b96dbbdb35d877a57143d080ad95_783	K_pneumoniae_3_02707
WP_014906863.1		oxaloacetate decarboxylase subunit gamma	5	10	2	1	3560				242	251	250	9645baa8bb46fe9f9ffaa8fccfada4b3_995 9645baa8bb46fe9f9ffaa8fccfada4b3_8426 9645baa8bb46fe9f9ffaa8fccfada4b3_9642 9645baa8bb46fe9f9ffaa8fccfada4b3_6848		7073f0826909e86605b7f24ba93c455b_971	4d8fdf303c55f8e586b180af2243e275_982 4d8fdf303c55f8e586b180af2243e275_8914	2900b96dbbdb35d877a57143d080ad95_9077	K_pneumoniae_3_03344 K_pneumoniae_3_01808
WP_000654804.1		IS5/IS1182 family transposase	5	8	1.6	1	9608				155	968	642	9645baa8bb46fe9f9ffaa8fccfada4b3_10384		7073f0826909e86605b7f24ba93c455b_10363	4d8fdf303c55f8e586b180af2243e275_5858 4d8fdf303c55f8e586b180af2243e275_5884 4d8fdf303c55f8e586b180af2243e275_5862	2900b96dbbdb35d877a57143d080ad95_11446 2900b96dbbdb35d877a57143d080ad95_11814	K_pneumoniae_3_05005
dsdA		D-serine ammonia-lyase	5	5	1	1	6718	53	18		1328	1328	1328	9645baa8bb46fe9f9ffaa8fccfada4b3_50		7073f0826909e86605b7f24ba93c455b_52	4d8fdf303c55f8e586b180af2243e275_52	2900b96dbbdb35d877a57143d080ad95_52	K_pneumoniae_3_02351
dsdX		D-serine transporter DsdX	5	5	1	1	6719	53	19		1337	1337	1337	9645baa8bb46fe9f9ffaa8fccfada4b3_52		7073f0826909e86605b7f24ba93c455b_54	4d8fdf303c55f8e586b180af2243e275_54	2900b96dbbdb35d877a57143d080ad95_54	K_pneumoniae_3_02352
dsdC		DNA-binding transcriptional regulator DsdC	5	5	1	1	6721	53	21		923	923	923	9645baa8bb46fe9f9ffaa8fccfada4b3_56		7073f0826909e86605b7f24ba93c455b_58	4d8fdf303c55f8e586b180af2243e275_58	2900b96dbbdb35d877a57143d080ad95_58	K_pneumoniae_3_02353
emrD		multidrug efflux MFS transporter EmrD	5	5	1	1	6722	53	22		1184	1184	1184	9645baa8bb46fe9f9ffaa8fccfada4b3_58		7073f0826909e86605b7f24ba93c455b_60	4d8fdf303c55f8e586b180af2243e275_60	2900b96dbbdb35d877a57143d080ad95_60	K_pneumoniae_3_02354
WP_002923296.1		DMT family transporter	5	5	1	1	6723	53	23		833	833	833	9645baa8bb46fe9f9ffaa8fccfada4b3_60		7073f0826909e86605b7f24ba93c455b_62	4d8fdf303c55f8e586b180af2243e275_62	2900b96dbbdb35d877a57143d080ad95_62	K_pneumoniae_3_02355
WP_002923294.1		GNAT family N-acetyltransferase	5	5	1	1	6724	53	24		446	446	446	9645baa8bb46fe9f9ffaa8fccfada4b3_62		7073f0826909e86605b7f24ba93c455b_64	4d8fdf303c55f8e586b180af2243e275_64	2900b96dbbdb35d877a57143d080ad95_64	K_pneumoniae_3_02356
ivbL		ilvB operon leader peptide IvbL	5	5	1	1	6727	53	6		95	95	95	9645baa8bb46fe9f9ffaa8fccfada4b3_68		7073f0826909e86605b7f24ba93c455b_70	4d8fdf303c55f8e586b180af2243e275_70	2900b96dbbdb35d877a57143d080ad95_70	K_pneumoniae_3_02358
ilvB		acetolactate synthase large subunit	5	5	1	1	6728	53	5		1688	1688	1688	9645baa8bb46fe9f9ffaa8fccfada4b3_70		7073f0826909e86605b7f24ba93c455b_72	4d8fdf303c55f8e586b180af2243e275_72	2900b96dbbdb35d877a57143d080ad95_72	K_pneumoniae_3_02359
group_1009	ilvN	acetolactate synthase small subunit	5	5	1	1	6729	53	4		287	287	287	9645baa8bb46fe9f9ffaa8fccfada4b3_72		7073f0826909e86605b7f24ba93c455b_74	4d8fdf303c55f8e586b180af2243e275_74	2900b96dbbdb35d877a57143d080ad95_74	K_pneumoniae_3_02360
yccX		acylphosphatase	5	5	1	1	1025	1	1201		281	293	283	9645baa8bb46fe9f9ffaa8fccfada4b3_6363		7073f0826909e86605b7f24ba93c455b_6708	4d8fdf303c55f8e586b180af2243e275_6729	2900b96dbbdb35d877a57143d080ad95_6860	K_pneumoniae_3_00779
uhpA		transcriptional regulator UhpA	5	5	1	1	6730	53	3		593	593	593	9645baa8bb46fe9f9ffaa8fccfada4b3_74		7073f0826909e86605b7f24ba93c455b_76	4d8fdf303c55f8e586b180af2243e275_76	2900b96dbbdb35d877a57143d080ad95_76	K_pneumoniae_3_02361
WP_004145056.1		MFS transporter	5	5	1	1	6732	53	1		1325	1328	1327	9645baa8bb46fe9f9ffaa8fccfada4b3_78		7073f0826909e86605b7f24ba93c455b_80	4d8fdf303c55f8e586b180af2243e275_80	2900b96dbbdb35d877a57143d080ad95_80	K_pneumoniae_3_02363
WP_002923278.1		DUF1198 family protein	5	5	1	1	6857	104	1		452	452	452	9645baa8bb46fe9f9ffaa8fccfada4b3_82		7073f0826909e86605b7f24ba93c455b_84	4d8fdf303c55f8e586b180af2243e275_84	2900b96dbbdb35d877a57143d080ad95_84	K_pneumoniae_3_02365
WP_004173862.1		DNA-binding transcriptional regulator	5	5	1	1	6856	104	2		323	323	323	9645baa8bb46fe9f9ffaa8fccfada4b3_84		7073f0826909e86605b7f24ba93c455b_86	4d8fdf303c55f8e586b180af2243e275_86	2900b96dbbdb35d877a57143d080ad95_86	K_pneumoniae_3_02366
nepI		purine ribonucleoside efflux pump NepI	5	5	1	1	6854	104	4		1193	1193	1193	9645baa8bb46fe9f9ffaa8fccfada4b3_88		7073f0826909e86605b7f24ba93c455b_90	4d8fdf303c55f8e586b180af2243e275_90	2900b96dbbdb35d877a57143d080ad95_90	K_pneumoniae_3_02368
phnW		2-aminoethylphosphonate--pyruvate transaminase	5	5	1	1	6852	104	10		1103	1103	1103	9645baa8bb46fe9f9ffaa8fccfada4b3_92		7073f0826909e86605b7f24ba93c455b_94	4d8fdf303c55f8e586b180af2243e275_94	2900b96dbbdb35d877a57143d080ad95_94	K_pneumoniae_3_02370
phnR		phosphonate utilization transcriptional regulator PhnR	5	5	1	1	6851	104	9		719	719	719	9645baa8bb46fe9f9ffaa8fccfada4b3_94		7073f0826909e86605b7f24ba93c455b_96	4d8fdf303c55f8e586b180af2243e275_96	2900b96dbbdb35d877a57143d080ad95_96	K_pneumoniae_3_02371
phnS		2-aminoethylphosphonate ABC transporter substrate-binding protein	5	5	1	1	6850	104	8		1013	1013	1013	9645baa8bb46fe9f9ffaa8fccfada4b3_96		7073f0826909e86605b7f24ba93c455b_98	4d8fdf303c55f8e586b180af2243e275_98	2900b96dbbdb35d877a57143d080ad95_98	K_pneumoniae_3_02372
phnT		2-aminoethylphosphonate ABC transport system ATP-binding subunit PhnT	5	5	1	1	6849	104	7		1112	1112	1112	9645baa8bb46fe9f9ffaa8fccfada4b3_98		7073f0826909e86605b7f24ba93c455b_100	4d8fdf303c55f8e586b180af2243e275_100	2900b96dbbdb35d877a57143d080ad95_100	K_pneumoniae_3_02373
phnU		2-aminoethylphosphonate ABC transporter permease subunit	5	5	1	1	6848	104	6		860	860	860	9645baa8bb46fe9f9ffaa8fccfada4b3_100		7073f0826909e86605b7f24ba93c455b_102	4d8fdf303c55f8e586b180af2243e275_102	2900b96dbbdb35d877a57143d080ad95_102	K_pneumoniae_3_02374
phnV		2-aminoethylphosphonate ABC transport system, membrane component PhnV	5	5	1	1	6847	104	5		797	797	797	9645baa8bb46fe9f9ffaa8fccfada4b3_102		7073f0826909e86605b7f24ba93c455b_104	4d8fdf303c55f8e586b180af2243e275_104	2900b96dbbdb35d877a57143d080ad95_104	K_pneumoniae_3_02375
WP_002923158.1		PTS lactose/cellobiose transporter subunit IIA	5	5	1	1	6845	14	1		302	302	302	9645baa8bb46fe9f9ffaa8fccfada4b3_106		7073f0826909e86605b7f24ba93c455b_108	4d8fdf303c55f8e586b180af2243e275_108	2900b96dbbdb35d877a57143d080ad95_108	K_pneumoniae_3_02377
WP_023280050.1		PhzF family phenazine biosynthesis protein	5	5	1	1	2445	2	125		791	794	792	9645baa8bb46fe9f9ffaa8fccfada4b3_5169		7073f0826909e86605b7f24ba93c455b_5363	4d8fdf303c55f8e586b180af2243e275_5408	2900b96dbbdb35d877a57143d080ad95_5499	K_pneumoniae_3_03933
WP_002923156.1		PTS cellobiose transporter subunit IIC	5	5	1	1	6844	14	2		1322	1322	1322	9645baa8bb46fe9f9ffaa8fccfada4b3_108		7073f0826909e86605b7f24ba93c455b_110	4d8fdf303c55f8e586b180af2243e275_110	2900b96dbbdb35d877a57143d080ad95_110	K_pneumoniae_3_02378
WP_004145041.1		PTS sugar transporter subunit IIB	5	5	1	1	6843	14	3		314	314	314	9645baa8bb46fe9f9ffaa8fccfada4b3_110		7073f0826909e86605b7f24ba93c455b_112	4d8fdf303c55f8e586b180af2243e275_112	2900b96dbbdb35d877a57143d080ad95_112	K_pneumoniae_3_02379
WP_002923153.1		aromatic acid/H+ symport family MFS transporter	5	5	1	1	6841	14	5		1370	1370	1370	9645baa8bb46fe9f9ffaa8fccfada4b3_114		7073f0826909e86605b7f24ba93c455b_116	4d8fdf303c55f8e586b180af2243e275_116	2900b96dbbdb35d877a57143d080ad95_116	K_pneumoniae_3_02381
WP_002923152.1		gallate dioxygenase	5	5	1	1	6840	14	6		1262	1262	1262	9645baa8bb46fe9f9ffaa8fccfada4b3_116		7073f0826909e86605b7f24ba93c455b_118	4d8fdf303c55f8e586b180af2243e275_118	2900b96dbbdb35d877a57143d080ad95_118	K_pneumoniae_3_02382
WP_002923147.1		LysR family transcriptional regulator	5	5	1	1	6839	14	7		1226	1226	1226	9645baa8bb46fe9f9ffaa8fccfada4b3_118		7073f0826909e86605b7f24ba93c455b_120	4d8fdf303c55f8e586b180af2243e275_120	2900b96dbbdb35d877a57143d080ad95_120	K_pneumoniae_3_02383
galB		4-oxalmesaconate hydratase	5	5	1	1	6838	14	8		740	740	740	9645baa8bb46fe9f9ffaa8fccfada4b3_120		7073f0826909e86605b7f24ba93c455b_122	4d8fdf303c55f8e586b180af2243e275_122	2900b96dbbdb35d877a57143d080ad95_122	K_pneumoniae_3_02384
WP_004145036.1		4-carboxy-4-hydroxy-2-oxoadipate aldolase/oxaloacetate decarboxylase	5	5	1	1	6837	14	9		713	713	713	9645baa8bb46fe9f9ffaa8fccfada4b3_122		7073f0826909e86605b7f24ba93c455b_124	4d8fdf303c55f8e586b180af2243e275_124	2900b96dbbdb35d877a57143d080ad95_124	K_pneumoniae_3_02385
WP_239593273.1		ComEC family protein	5	5	1	1	909	74	4		2264	2279	2267	9645baa8bb46fe9f9ffaa8fccfada4b3_6471		7073f0826909e86605b7f24ba93c455b_6828	4d8fdf303c55f8e586b180af2243e275_6854	2900b96dbbdb35d877a57143d080ad95_6968	K_pneumoniae_3_00718
WP_020325244.1		efflux RND transporter permease subunit	5	5	1	1	4491	1	2352		3092	3113	3096	9645baa8bb46fe9f9ffaa8fccfada4b3_7288		7073f0826909e86605b7f24ba93c455b_7616	4d8fdf303c55f8e586b180af2243e275_7650	2900b96dbbdb35d877a57143d080ad95_7787	K_pneumoniae_3_00340
WP_004145035.1		4-oxalomesaconate tautomerase	5	5	1	1	6836	14	10		1085	1085	1085	9645baa8bb46fe9f9ffaa8fccfada4b3_124		7073f0826909e86605b7f24ba93c455b_126	4d8fdf303c55f8e586b180af2243e275_126	2900b96dbbdb35d877a57143d080ad95_126	K_pneumoniae_3_02386
WP_004181570.1		NAD(P)-dependent oxidoreductase	5	5	1	1	6835	14	11		863	863	863	9645baa8bb46fe9f9ffaa8fccfada4b3_126		7073f0826909e86605b7f24ba93c455b_128	4d8fdf303c55f8e586b180af2243e275_128	2900b96dbbdb35d877a57143d080ad95_128	K_pneumoniae_3_02387
murP		PTS N-acetylmuramic acid transporter subunit IIBC	5	5	1	1	6832	14	14		1433	1433	1433	9645baa8bb46fe9f9ffaa8fccfada4b3_132		7073f0826909e86605b7f24ba93c455b_134	4d8fdf303c55f8e586b180af2243e275_134	2900b96dbbdb35d877a57143d080ad95_134	K_pneumoniae_3_02390
murQ		N-acetylmuramic acid 6-phosphate etherase	5	5	1	1	6831	14	15		902	902	902	9645baa8bb46fe9f9ffaa8fccfada4b3_134		7073f0826909e86605b7f24ba93c455b_136	4d8fdf303c55f8e586b180af2243e275_136	2900b96dbbdb35d877a57143d080ad95_136	K_pneumoniae_3_02391
WP_002923107.1		multidrug effflux MFS transporter	5	5	1	1	6830	14	16		1163	1163	1163	9645baa8bb46fe9f9ffaa8fccfada4b3_136		7073f0826909e86605b7f24ba93c455b_138	4d8fdf303c55f8e586b180af2243e275_138	2900b96dbbdb35d877a57143d080ad95_138	K_pneumoniae_3_02392
eefC		multidrug efflux RND transporter outer membrane subunit EefC	5	5	1	1	6829	14	17		1364	1364	1364	9645baa8bb46fe9f9ffaa8fccfada4b3_138		7073f0826909e86605b7f24ba93c455b_140	4d8fdf303c55f8e586b180af2243e275_140	2900b96dbbdb35d877a57143d080ad95_140	K_pneumoniae_3_02393
eefB		multidrug efflux RND transporter permease subunit EefB	5	5	1	1	6828	14	18		3107	3107	3107	9645baa8bb46fe9f9ffaa8fccfada4b3_140		7073f0826909e86605b7f24ba93c455b_142	4d8fdf303c55f8e586b180af2243e275_142	2900b96dbbdb35d877a57143d080ad95_142	K_pneumoniae_3_02394
eefA		multidrug efflux RND transporter periplasmic adaptor subunit EefA	5	5	1	1	6827	14	19		1124	1124	1124	9645baa8bb46fe9f9ffaa8fccfada4b3_142		7073f0826909e86605b7f24ba93c455b_144	4d8fdf303c55f8e586b180af2243e275_144	2900b96dbbdb35d877a57143d080ad95_144	K_pneumoniae_3_02395
WP_032445278.1		TetR/AcrR family transcriptional regulator	5	5	1	1	6822	14	24		647	647	647	9645baa8bb46fe9f9ffaa8fccfada4b3_150		7073f0826909e86605b7f24ba93c455b_152	4d8fdf303c55f8e586b180af2243e275_152	2900b96dbbdb35d877a57143d080ad95_152	K_pneumoniae_3_02398
WP_004145022.1		MFS transporter	5	5	1	1	6821	14	25		1493	1493	1493	9645baa8bb46fe9f9ffaa8fccfada4b3_152		7073f0826909e86605b7f24ba93c455b_154	4d8fdf303c55f8e586b180af2243e275_154	2900b96dbbdb35d877a57143d080ad95_154	K_pneumoniae_3_02399
WP_002923018.1		pyridoxamine 5'-phosphate oxidase family protein	5	5	1	1	6819	14	27		626	626	626	9645baa8bb46fe9f9ffaa8fccfada4b3_156		7073f0826909e86605b7f24ba93c455b_158	4d8fdf303c55f8e586b180af2243e275_158	2900b96dbbdb35d877a57143d080ad95_158	K_pneumoniae_3_02401
WP_016529674.1		nuclear transport factor 2 family protein	5	5	1	1	6818	14	28		470	470	470	9645baa8bb46fe9f9ffaa8fccfada4b3_158		7073f0826909e86605b7f24ba93c455b_160	4d8fdf303c55f8e586b180af2243e275_160	2900b96dbbdb35d877a57143d080ad95_160	K_pneumoniae_3_02402
nlpA		lipoprotein NlpA	5	5	1	1	6815	14	31		809	809	809	9645baa8bb46fe9f9ffaa8fccfada4b3_164		7073f0826909e86605b7f24ba93c455b_166	4d8fdf303c55f8e586b180af2243e275_166	2900b96dbbdb35d877a57143d080ad95_166	K_pneumoniae_3_02405
WP_002922972.1		DMT family transporter	5	5	1	1	6814	14	32		854	854	854	9645baa8bb46fe9f9ffaa8fccfada4b3_166		7073f0826909e86605b7f24ba93c455b_168	4d8fdf303c55f8e586b180af2243e275_168	2900b96dbbdb35d877a57143d080ad95_168	K_pneumoniae_3_02406
WP_002922970.1		NUDIX hydrolase	5	5	1	1	6813	14	33		560	560	560	9645baa8bb46fe9f9ffaa8fccfada4b3_168		7073f0826909e86605b7f24ba93c455b_170	4d8fdf303c55f8e586b180af2243e275_170	2900b96dbbdb35d877a57143d080ad95_170	K_pneumoniae_3_02407
WP_032420704.1		MBL fold metallo-hydrolase	5	5	1	1	6812	14	34		779	779	779	9645baa8bb46fe9f9ffaa8fccfada4b3_170		7073f0826909e86605b7f24ba93c455b_172	4d8fdf303c55f8e586b180af2243e275_172	2900b96dbbdb35d877a57143d080ad95_172	K_pneumoniae_3_02408
WP_049186256.1		helix-turn-helix domain-containing protein	5	5	1	1	6811	14	35		953	953	953	9645baa8bb46fe9f9ffaa8fccfada4b3_172		7073f0826909e86605b7f24ba93c455b_174	4d8fdf303c55f8e586b180af2243e275_174	2900b96dbbdb35d877a57143d080ad95_174	K_pneumoniae_3_02409
group_10470	bcsB	cellulose biosynthesis cyclic di-GMP-binding regulatory protein BcsB	5	5	1	1	11610	37	30		2435	2441	2436	9645baa8bb46fe9f9ffaa8fccfada4b3_472		7073f0826909e86605b7f24ba93c455b_453	4d8fdf303c55f8e586b180af2243e275_457	2900b96dbbdb35d877a57143d080ad95_465	K_pneumoniae_3_02549
WP_239593439.1		NAD(P)-dependent alcohol dehydrogenase	5	5	1	1	6810	14	36		1049	1049	1049	9645baa8bb46fe9f9ffaa8fccfada4b3_174		7073f0826909e86605b7f24ba93c455b_176	4d8fdf303c55f8e586b180af2243e275_176	2900b96dbbdb35d877a57143d080ad95_176	K_pneumoniae_3_02410
WP_004151047.1		4Fe-4S dicluster domain-containing protein	5	5	1	1	11208	21	3		608	611	608	9645baa8bb46fe9f9ffaa8fccfada4b3_2135		7073f0826909e86605b7f24ba93c455b_2247	4d8fdf303c55f8e586b180af2243e275_2281	2900b96dbbdb35d877a57143d080ad95_2107	K_pneumoniae_3_04261
WP_002922965.1		antibiotic biosynthesis monooxygenase	5	5	1	1	6807	14	66		290	290	290	9645baa8bb46fe9f9ffaa8fccfada4b3_178		7073f0826909e86605b7f24ba93c455b_180	4d8fdf303c55f8e586b180af2243e275_180	2900b96dbbdb35d877a57143d080ad95_180	K_pneumoniae_3_02412
WP_002914119.1		DUF2946 domain-containing protein	5	5	1	1	2127	46	1		458	461	458	9645baa8bb46fe9f9ffaa8fccfada4b3_2402		7073f0826909e86605b7f24ba93c455b_2481	4d8fdf303c55f8e586b180af2243e275_2545	2900b96dbbdb35d877a57143d080ad95_2351	K_pneumoniae_3_04149
WP_023300803.1		SDR family oxidoreductase	5	5	1	1	4448	1	2391		776	776	776	9645baa8bb46fe9f9ffaa8fccfada4b3_7368		7073f0826909e86605b7f24ba93c455b_7686	4d8fdf303c55f8e586b180af2243e275_7720	2900b96dbbdb35d877a57143d080ad95_7867	K_pneumoniae_3_00305
WP_002922964.1		zinc-binding alcohol dehydrogenase family protein	5	5	1	1	6806	14	65		1007	1007	1007	9645baa8bb46fe9f9ffaa8fccfada4b3_180		7073f0826909e86605b7f24ba93c455b_182	4d8fdf303c55f8e586b180af2243e275_182	2900b96dbbdb35d877a57143d080ad95_182	K_pneumoniae_3_02413
WP_002922963.1		DUF3237 domain-containing protein	5	5	1	1	6805	14	64		467	467	467	9645baa8bb46fe9f9ffaa8fccfada4b3_182		7073f0826909e86605b7f24ba93c455b_184	4d8fdf303c55f8e586b180af2243e275_184	2900b96dbbdb35d877a57143d080ad95_184	K_pneumoniae_3_02414
WP_002922962.1		glycoside-pentoside-hexuronide family transporter	5	5	1	1	9230	14	62		1394	1394	1394	9645baa8bb46fe9f9ffaa8fccfada4b3_187		7073f0826909e86605b7f24ba93c455b_189	4d8fdf303c55f8e586b180af2243e275_189	2900b96dbbdb35d877a57143d080ad95_201	K_pneumoniae_3_02416
yicI		alpha-xylosidase	5	5	1	1	9231	14	61		2318	2318	2318	9645baa8bb46fe9f9ffaa8fccfada4b3_189		7073f0826909e86605b7f24ba93c455b_191	4d8fdf303c55f8e586b180af2243e275_191	2900b96dbbdb35d877a57143d080ad95_203	K_pneumoniae_3_02417
WP_004173889.1		SIS domain-containing protein	5	5	1	1	9232	14	60		722	722	722	9645baa8bb46fe9f9ffaa8fccfada4b3_191		7073f0826909e86605b7f24ba93c455b_193	4d8fdf303c55f8e586b180af2243e275_193	2900b96dbbdb35d877a57143d080ad95_205	K_pneumoniae_3_02418
WP_004150228.1		glycoside hydrolase	5	5	1	1	9233	14	59		1379	1379	1379	9645baa8bb46fe9f9ffaa8fccfada4b3_193		7073f0826909e86605b7f24ba93c455b_195	4d8fdf303c55f8e586b180af2243e275_195	2900b96dbbdb35d877a57143d080ad95_207	K_pneumoniae_3_02419
yafP_2		GNAT family N-acetyltransferase	5	5	1	1	5191	52	10		461	464	461	9645baa8bb46fe9f9ffaa8fccfada4b3_3182		7073f0826909e86605b7f24ba93c455b_3251	4d8fdf303c55f8e586b180af2243e275_3341	2900b96dbbdb35d877a57143d080ad95_3236	K_pneumoniae_3_01394
WP_002922953.1		PTS transporter subunit EIIC	5	5	1	1	9234	14	58		1559	1559	1559	9645baa8bb46fe9f9ffaa8fccfada4b3_195		7073f0826909e86605b7f24ba93c455b_197	4d8fdf303c55f8e586b180af2243e275_197	2900b96dbbdb35d877a57143d080ad95_209	K_pneumoniae_3_02420
WP_032420696.1		AsmA family protein	5	5	1	1	9235	14	57		1715	1715	1715	9645baa8bb46fe9f9ffaa8fccfada4b3_197		7073f0826909e86605b7f24ba93c455b_199	4d8fdf303c55f8e586b180af2243e275_199	2900b96dbbdb35d877a57143d080ad95_211	K_pneumoniae_3_02421
WP_002922950.1		uracil-xanthine permease family protein	5	5	1	1	9236	14	56		1391	1391	1391	9645baa8bb46fe9f9ffaa8fccfada4b3_199		7073f0826909e86605b7f24ba93c455b_201	4d8fdf303c55f8e586b180af2243e275_201	2900b96dbbdb35d877a57143d080ad95_213	K_pneumoniae_3_02422
gltS		sodium/glutamate symporter	5	5	1	1	9237	14	55		1202	1202	1202	9645baa8bb46fe9f9ffaa8fccfada4b3_201		7073f0826909e86605b7f24ba93c455b_203	4d8fdf303c55f8e586b180af2243e275_203	2900b96dbbdb35d877a57143d080ad95_215	K_pneumoniae_3_02423
WP_049188613.1		EAL domain-containing protein	5	5	1	1	6126	63	9		1577	1601	1584	9645baa8bb46fe9f9ffaa8fccfada4b3_3670		7073f0826909e86605b7f24ba93c455b_3723	4d8fdf303c55f8e586b180af2243e275_3927	2900b96dbbdb35d877a57143d080ad95_3841	K_pneumoniae_3_01168
WP_004183268.1		MoaF N-terminal domain-containing protein	5	5	1	1	4447	1	2392		755	791	783	9645baa8bb46fe9f9ffaa8fccfada4b3_7370		7073f0826909e86605b7f24ba93c455b_7688	4d8fdf303c55f8e586b180af2243e275_7722	2900b96dbbdb35d877a57143d080ad95_7869	K_pneumoniae_3_00304
glpK		glycerol kinase GlpK	5	5	1	1	9238	14	54		1511	1511	1511	9645baa8bb46fe9f9ffaa8fccfada4b3_203		7073f0826909e86605b7f24ba93c455b_205	4d8fdf303c55f8e586b180af2243e275_205	2900b96dbbdb35d877a57143d080ad95_217	K_pneumoniae_3_02424
WP_002922941.1		aquaporin	5	5	1	1	9239	14	53		851	851	851	9645baa8bb46fe9f9ffaa8fccfada4b3_205		7073f0826909e86605b7f24ba93c455b_207	4d8fdf303c55f8e586b180af2243e275_207	2900b96dbbdb35d877a57143d080ad95_219	K_pneumoniae_3_02425
WP_002922936.1		sulfate ABC transporter substrate-binding protein	5	5	1	1	9241	14	51		989	989	989	9645baa8bb46fe9f9ffaa8fccfada4b3_209		7073f0826909e86605b7f24ba93c455b_211	4d8fdf303c55f8e586b180af2243e275_211	2900b96dbbdb35d877a57143d080ad95_223	K_pneumoniae_3_02427
WP_020803798.1		CDP-diacylglycerol diphosphatase	5	5	1	1	9242	14	50		764	770	768	9645baa8bb46fe9f9ffaa8fccfada4b3_211		7073f0826909e86605b7f24ba93c455b_213	4d8fdf303c55f8e586b180af2243e275_213	2900b96dbbdb35d877a57143d080ad95_225	K_pneumoniae_3_02428
WP_004151505.1		anion permease	5	5	1	1	9243	14	49		1304	1304	1304	9645baa8bb46fe9f9ffaa8fccfada4b3_213		7073f0826909e86605b7f24ba93c455b_215	4d8fdf303c55f8e586b180af2243e275_215	2900b96dbbdb35d877a57143d080ad95_227	K_pneumoniae_3_02429
tpiA		triose-phosphate isomerase	5	5	1	1	9244	14	48		767	767	767	9645baa8bb46fe9f9ffaa8fccfada4b3_215		7073f0826909e86605b7f24ba93c455b_217	4d8fdf303c55f8e586b180af2243e275_217	2900b96dbbdb35d877a57143d080ad95_229	K_pneumoniae_3_02430
WP_004186171.1		YiiQ family protein	5	5	1	1	9245	14	47		602	602	602	9645baa8bb46fe9f9ffaa8fccfada4b3_217		7073f0826909e86605b7f24ba93c455b_219	4d8fdf303c55f8e586b180af2243e275_219	2900b96dbbdb35d877a57143d080ad95_231	K_pneumoniae_3_02431
WP_085858897.1		DUF4056 domain-containing protein	5	5	1	1	8105	1	2791		1106	1121	1109	9645baa8bb46fe9f9ffaa8fccfada4b3_4827		7073f0826909e86605b7f24ba93c455b_5007	4d8fdf303c55f8e586b180af2243e275_5181	2900b96dbbdb35d877a57143d080ad95_5125	K_pneumoniae_3_03568
WP_004173894.1		DUF805 domain-containing protein	5	5	1	1	9246	14	46		428	428	428	9645baa8bb46fe9f9ffaa8fccfada4b3_219		7073f0826909e86605b7f24ba93c455b_221	4d8fdf303c55f8e586b180af2243e275_221	2900b96dbbdb35d877a57143d080ad95_233	K_pneumoniae_3_02432
fpr		ferredoxin--NADP(+) reductase	5	5	1	1	9247	14	45		746	746	746	9645baa8bb46fe9f9ffaa8fccfada4b3_221		7073f0826909e86605b7f24ba93c455b_223	4d8fdf303c55f8e586b180af2243e275_223	2900b96dbbdb35d877a57143d080ad95_235	K_pneumoniae_3_02433
hpxE		molybdenum cofactor-independent xanthine hydroxylase subunit HpxE	5	5	1	1	2406	58	8		974	983	976	9645baa8bb46fe9f9ffaa8fccfada4b3_5093		7073f0826909e86605b7f24ba93c455b_5301	4d8fdf303c55f8e586b180af2243e275_5328	2900b96dbbdb35d877a57143d080ad95_5427	K_pneumoniae_3_03902
glpX		class II fructose-bisphosphatase	5	5	1	1	9248	14	44		1010	1010	1010	9645baa8bb46fe9f9ffaa8fccfada4b3_223		7073f0826909e86605b7f24ba93c455b_225	4d8fdf303c55f8e586b180af2243e275_225	2900b96dbbdb35d877a57143d080ad95_237	K_pneumoniae_3_02434
WP_004190861.1		hypothetical protein	5	5	1	1	7110	15	3		563	566	563	9645baa8bb46fe9f9ffaa8fccfada4b3_5946		7073f0826909e86605b7f24ba93c455b_6134	4d8fdf303c55f8e586b180af2243e275_6279	2900b96dbbdb35d877a57143d080ad95_6268	K_pneumoniae_3_03001
trmH		tRNA (guanosine(18)-2'-O)-methyltransferase TrmH	5	5	1	1	9250	14	42		689	689	689	9645baa8bb46fe9f9ffaa8fccfada4b3_227		7073f0826909e86605b7f24ba93c455b_229	4d8fdf303c55f8e586b180af2243e275_229	2900b96dbbdb35d877a57143d080ad95_241	K_pneumoniae_3_02436
gmk		guanylate kinase	5	5	1	1	8927	8	13		623	623	623	9645baa8bb46fe9f9ffaa8fccfada4b3_233		7073f0826909e86605b7f24ba93c455b_235	4d8fdf303c55f8e586b180af2243e275_235	2900b96dbbdb35d877a57143d080ad95_247	K_pneumoniae_3_02439
ligB		NAD-dependent DNA ligase LigB	5	5	1	1	8926	8	14		1676	1676	1676	9645baa8bb46fe9f9ffaa8fccfada4b3_235		7073f0826909e86605b7f24ba93c455b_237	4d8fdf303c55f8e586b180af2243e275_237	2900b96dbbdb35d877a57143d080ad95_249	K_pneumoniae_3_02440
WP_002922654.1		trimeric intracellular cation channel family protein	5	5	1	1	8925	8	15		617	617	617	9645baa8bb46fe9f9ffaa8fccfada4b3_237		7073f0826909e86605b7f24ba93c455b_239	4d8fdf303c55f8e586b180af2243e275_239	2900b96dbbdb35d877a57143d080ad95_251	K_pneumoniae_3_02441
WP_040165227.1		chloride channel protein	5	5	1	1	8924	8	16		1250	1250	1250	9645baa8bb46fe9f9ffaa8fccfada4b3_239		7073f0826909e86605b7f24ba93c455b_241	4d8fdf303c55f8e586b180af2243e275_241	2900b96dbbdb35d877a57143d080ad95_253	K_pneumoniae_3_02442
WP_004151500.1		methylated-DNA--[protein]-cysteine S-methyltransferase	5	5	1	1	8923	8	17		1058	1058	1058	9645baa8bb46fe9f9ffaa8fccfada4b3_241		7073f0826909e86605b7f24ba93c455b_243	4d8fdf303c55f8e586b180af2243e275_243	2900b96dbbdb35d877a57143d080ad95_255	K_pneumoniae_3_02443
WP_002887654.1		DUF1435 domain-containing protein	5	5	1	1	2859	4	9		239	353	261	9645baa8bb46fe9f9ffaa8fccfada4b3_8566		7073f0826909e86605b7f24ba93c455b_8854	4d8fdf303c55f8e586b180af2243e275_9074	2900b96dbbdb35d877a57143d080ad95_9215	K_pneumoniae_3_03409
mrcB		bifunctional glycosyl transferase/transpeptidase	5	5	1	1	3331	45	20		2549	2561	2553	9645baa8bb46fe9f9ffaa8fccfada4b3_8149		7073f0826909e86605b7f24ba93c455b_8459	4d8fdf303c55f8e586b180af2243e275_8637	2900b96dbbdb35d877a57143d080ad95_8798	K_pneumoniae_3_03212
WP_002922636.1		YicC family protein	5	5	1	1	8929	8	19		863	863	863	9645baa8bb46fe9f9ffaa8fccfada4b3_264		7073f0826909e86605b7f24ba93c455b_247	4d8fdf303c55f8e586b180af2243e275_247	2900b96dbbdb35d877a57143d080ad95_259	K_pneumoniae_3_02445
WP_004181533.1		ABC transporter ATP-binding protein	5	5	1	1	9129	207	2		917	917	917	9645baa8bb46fe9f9ffaa8fccfada4b3_272		7073f0826909e86605b7f24ba93c455b_255	4d8fdf303c55f8e586b180af2243e275_259	2900b96dbbdb35d877a57143d080ad95_267	K_pneumoniae_3_02448
WP_004150202.1		ABC transporter permease	5	5	1	1	9130	207	1		1094	1094	1094	9645baa8bb46fe9f9ffaa8fccfada4b3_274		7073f0826909e86605b7f24ba93c455b_257	4d8fdf303c55f8e586b180af2243e275_261	2900b96dbbdb35d877a57143d080ad95_269	K_pneumoniae_3_02449
pyrE		orotate phosphoribosyltransferase	5	5	1	1	9196	232	1		641	641	641	9645baa8bb46fe9f9ffaa8fccfada4b3_278		7073f0826909e86605b7f24ba93c455b_261	4d8fdf303c55f8e586b180af2243e275_265	2900b96dbbdb35d877a57143d080ad95_273	K_pneumoniae_3_02451
WP_121593393.1		efflux RND transporter periplasmic adaptor subunit	5	5	1	1	2761	4	68		1262	1262	1262	9645baa8bb46fe9f9ffaa8fccfada4b3_8786		7073f0826909e86605b7f24ba93c455b_9052	4d8fdf303c55f8e586b180af2243e275_9272	2900b96dbbdb35d877a57143d080ad95_9417	K_pneumoniae_3_04453
dut		dUTP diphosphatase	5	5	1	1	9192	175	1		458	458	458	9645baa8bb46fe9f9ffaa8fccfada4b3_282		7073f0826909e86605b7f24ba93c455b_267	4d8fdf303c55f8e586b180af2243e275_269	2900b96dbbdb35d877a57143d080ad95_279	K_pneumoniae_3_02453
radC		DNA repair protein RadC	5	5	1	1	9190	175	2		665	665	665	9645baa8bb46fe9f9ffaa8fccfada4b3_286		7073f0826909e86605b7f24ba93c455b_271	4d8fdf303c55f8e586b180af2243e275_273	2900b96dbbdb35d877a57143d080ad95_283	K_pneumoniae_3_02455
mutM		bifunctional DNA-formamidopyrimidine glycosylase/DNA-(apurinic or apyrimidinic site) lyase	5	5	1	1	9143	87	2		809	809	809	9645baa8bb46fe9f9ffaa8fccfada4b3_292		7073f0826909e86605b7f24ba93c455b_277	4d8fdf303c55f8e586b180af2243e275_279	2900b96dbbdb35d877a57143d080ad95_289	K_pneumoniae_3_02458
coaD		pantetheine-phosphate adenylyltransferase	5	5	1	1	9142	87	3		479	479	479	9645baa8bb46fe9f9ffaa8fccfada4b3_294		7073f0826909e86605b7f24ba93c455b_279	4d8fdf303c55f8e586b180af2243e275_281	2900b96dbbdb35d877a57143d080ad95_291	K_pneumoniae_3_02459
waaA		lipid IV(A) 3-deoxy-D-manno-octulosonic acid transferase	5	5	1	1	9140	87	5		1274	1274	1274	9645baa8bb46fe9f9ffaa8fccfada4b3_298		7073f0826909e86605b7f24ba93c455b_283	4d8fdf303c55f8e586b180af2243e275_285	2900b96dbbdb35d877a57143d080ad95_295	K_pneumoniae_3_02461
WP_004173909.1		glycosyltransferase	5	5	1	1	9139	87	6		989	989	989	9645baa8bb46fe9f9ffaa8fccfada4b3_300		7073f0826909e86605b7f24ba93c455b_285	4d8fdf303c55f8e586b180af2243e275_287	2900b96dbbdb35d877a57143d080ad95_297	K_pneumoniae_3_02462
WP_004145262.1		glycosyltransferase	5	5	1	1	9138	87	7		1094	1094	1094	9645baa8bb46fe9f9ffaa8fccfada4b3_302		7073f0826909e86605b7f24ba93c455b_287	4d8fdf303c55f8e586b180af2243e275_289	2900b96dbbdb35d877a57143d080ad95_299	K_pneumoniae_3_02463
WP_009308781.1		glycosyltransferase family 4 protein	5	5	1	1	9137	87	8		1127	1127	1127	9645baa8bb46fe9f9ffaa8fccfada4b3_304		7073f0826909e86605b7f24ba93c455b_289	4d8fdf303c55f8e586b180af2243e275_291	2900b96dbbdb35d877a57143d080ad95_301	K_pneumoniae_3_02464
rfaQ		putative lipopolysaccharide heptosyltransferase III	5	5	1	1	9136	87	9		1076	1076	1076	9645baa8bb46fe9f9ffaa8fccfada4b3_306		7073f0826909e86605b7f24ba93c455b_291	4d8fdf303c55f8e586b180af2243e275_293	2900b96dbbdb35d877a57143d080ad95_303	K_pneumoniae_3_02465
ugpC_2		ABC transporter ATP-binding protein	5	5	1	1	4785	1	2632		1073	1073	1073	9645baa8bb46fe9f9ffaa8fccfada4b3_8880		7073f0826909e86605b7f24ba93c455b_9167	4d8fdf303c55f8e586b180af2243e275_9400	2900b96dbbdb35d877a57143d080ad95_9482	K_pneumoniae_3_04398
kbl		glycine C-acetyltransferase	5	5	1	1	9165	251	1		1193	1193	1193	9645baa8bb46fe9f9ffaa8fccfada4b3_322		7073f0826909e86605b7f24ba93c455b_307	4d8fdf303c55f8e586b180af2243e275_309	2900b96dbbdb35d877a57143d080ad95_319	K_pneumoniae_3_02473
WP_002922459.1		divergent polysaccharide deacetylase family protein	5	5	1	1	9163	121	2		947	956	948	9645baa8bb46fe9f9ffaa8fccfada4b3_328		7073f0826909e86605b7f24ba93c455b_313	4d8fdf303c55f8e586b180af2243e275_315	2900b96dbbdb35d877a57143d080ad95_325	K_pneumoniae_3_02476
envC		murein hydrolase activator EnvC	5	5	1	1	9162	121	3		1256	1271	1268	9645baa8bb46fe9f9ffaa8fccfada4b3_330		7073f0826909e86605b7f24ba93c455b_315	4d8fdf303c55f8e586b180af2243e275_317	2900b96dbbdb35d877a57143d080ad95_327	K_pneumoniae_3_02477
gpmM		2,3-bisphosphoglycerate-independent phosphoglycerate mutase	5	5	1	1	9161	121	4		1544	1544	1544	9645baa8bb46fe9f9ffaa8fccfada4b3_332		7073f0826909e86605b7f24ba93c455b_317	4d8fdf303c55f8e586b180af2243e275_319	2900b96dbbdb35d877a57143d080ad95_329	K_pneumoniae_3_02478
WP_002922436.1		rhodanese-like domain-containing protein	5	5	1	1	9160	121	5		431	431	431	9645baa8bb46fe9f9ffaa8fccfada4b3_334		7073f0826909e86605b7f24ba93c455b_319	4d8fdf303c55f8e586b180af2243e275_321	2900b96dbbdb35d877a57143d080ad95_331	K_pneumoniae_3_02479
grxC		glutaredoxin 3	5	5	1	1	9159	121	8		251	251	251	9645baa8bb46fe9f9ffaa8fccfada4b3_336		7073f0826909e86605b7f24ba93c455b_321	4d8fdf303c55f8e586b180af2243e275_323	2900b96dbbdb35d877a57143d080ad95_333	K_pneumoniae_3_02480
WP_023343017.1		hypothetical protein	5	5	1	1	10018	112	8		170	1187	780	9645baa8bb46fe9f9ffaa8fccfada4b3_9002		7073f0826909e86605b7f24ba93c455b_9293	4d8fdf303c55f8e586b180af2243e275_9526	2900b96dbbdb35d877a57143d080ad95_9608	K_pneumoniae_3_04579
secB		protein-export chaperone SecB	5	5	1	1	9158	121	7		467	467	467	9645baa8bb46fe9f9ffaa8fccfada4b3_338		7073f0826909e86605b7f24ba93c455b_323	4d8fdf303c55f8e586b180af2243e275_325	2900b96dbbdb35d877a57143d080ad95_335	K_pneumoniae_3_02481
gpsA		NAD(P)H-dependent glycerol-3-phosphate dehydrogenase	5	5	1	1	9157	121	6		1019	1019	1019	9645baa8bb46fe9f9ffaa8fccfada4b3_340		7073f0826909e86605b7f24ba93c455b_325	4d8fdf303c55f8e586b180af2243e275_327	2900b96dbbdb35d877a57143d080ad95_337	K_pneumoniae_3_02482
trmL		tRNA (uridine(34)/cytosine(34)/5-carboxymethylaminomethyluridine(34)-2'-O)-methyltransferase TrmL	5	5	1	1	18	9	22		473	473	473	9645baa8bb46fe9f9ffaa8fccfada4b3_344		7073f0826909e86605b7f24ba93c455b_329	4d8fdf303c55f8e586b180af2243e275_331	2900b96dbbdb35d877a57143d080ad95_341	K_pneumoniae_3_02484
group_1113	lldD	FMN-dependent L-lactate dehydrogenase LldD	5	5	1	1	17	9	23		1184	1184	1184	9645baa8bb46fe9f9ffaa8fccfada4b3_346		7073f0826909e86605b7f24ba93c455b_331	4d8fdf303c55f8e586b180af2243e275_333	2900b96dbbdb35d877a57143d080ad95_343	K_pneumoniae_3_02485
lldR		transcriptional regulator LldR	5	5	1	1	16	9	24		773	773	773	9645baa8bb46fe9f9ffaa8fccfada4b3_348		7073f0826909e86605b7f24ba93c455b_333	4d8fdf303c55f8e586b180af2243e275_335	2900b96dbbdb35d877a57143d080ad95_345	K_pneumoniae_3_02486
lldP		L-lactate permease	5	5	1	1	15	9	25		1655	1655	1655	9645baa8bb46fe9f9ffaa8fccfada4b3_350		7073f0826909e86605b7f24ba93c455b_335	4d8fdf303c55f8e586b180af2243e275_337	2900b96dbbdb35d877a57143d080ad95_347	K_pneumoniae_3_02487
WP_002922410.1		YibL family ribosome-associated protein	5	5	1	1	14	9	26		362	362	362	9645baa8bb46fe9f9ffaa8fccfada4b3_352		7073f0826909e86605b7f24ba93c455b_337	4d8fdf303c55f8e586b180af2243e275_339	2900b96dbbdb35d877a57143d080ad95_349	K_pneumoniae_3_02488
WP_002922402.1		hypothetical protein	5	5	1	1	13	9	27		224	224	224	9645baa8bb46fe9f9ffaa8fccfada4b3_354		7073f0826909e86605b7f24ba93c455b_339	4d8fdf303c55f8e586b180af2243e275_341	2900b96dbbdb35d877a57143d080ad95_351	K_pneumoniae_3_02489
mtlR		mannitol operon repressor MtlR	5	5	1	1	12	9	28		596	596	596	9645baa8bb46fe9f9ffaa8fccfada4b3_356		7073f0826909e86605b7f24ba93c455b_341	4d8fdf303c55f8e586b180af2243e275_343	2900b96dbbdb35d877a57143d080ad95_353	K_pneumoniae_3_02490
mtlD		mannitol-1-phosphate 5-dehydrogenase	5	5	1	1	11	9	29		1148	1148	1148	9645baa8bb46fe9f9ffaa8fccfada4b3_358		7073f0826909e86605b7f24ba93c455b_343	4d8fdf303c55f8e586b180af2243e275_345	2900b96dbbdb35d877a57143d080ad95_355	K_pneumoniae_3_02491
WP_002885663.1		hypothetical protein	5	5	1	1	10689	66	2		290	293	290	9645baa8bb46fe9f9ffaa8fccfada4b3_9092		7073f0826909e86605b7f24ba93c455b_9381	4d8fdf303c55f8e586b180af2243e275_9614	2900b96dbbdb35d877a57143d080ad95_9698	K_pneumoniae_3_04622
mtlA		PTS mannitol transporter subunit IICBA	5	5	1	1	10	9	31		1907	1907	1907	9645baa8bb46fe9f9ffaa8fccfada4b3_360		7073f0826909e86605b7f24ba93c455b_345	4d8fdf303c55f8e586b180af2243e275_347	2900b96dbbdb35d877a57143d080ad95_357	K_pneumoniae_3_02492
WP_004145238.1		glutathione S-transferase	5	5	1	1	11789	9	34		608	608	608	9645baa8bb46fe9f9ffaa8fccfada4b3_364		7073f0826909e86605b7f24ba93c455b_351	4d8fdf303c55f8e586b180af2243e275_353	2900b96dbbdb35d877a57143d080ad95_363	K_pneumoniae_3_02493
selA		L-seryl-tRNA(Sec) selenium transferase	5	5	1	1	11790	9	35		1388	1388	1388	9645baa8bb46fe9f9ffaa8fccfada4b3_366		7073f0826909e86605b7f24ba93c455b_353	4d8fdf303c55f8e586b180af2243e275_355	2900b96dbbdb35d877a57143d080ad95_365	K_pneumoniae_3_02494
selB		selenocysteine-specific translation elongation factor	5	5	1	1	11791	9	36		1841	1841	1841	9645baa8bb46fe9f9ffaa8fccfada4b3_368		7073f0826909e86605b7f24ba93c455b_355	4d8fdf303c55f8e586b180af2243e275_357	2900b96dbbdb35d877a57143d080ad95_367	K_pneumoniae_3_02495
WP_002922360.1		4Fe-4S binding protein	5	5	1	1	11793	9	20		485	485	485	9645baa8bb46fe9f9ffaa8fccfada4b3_372		7073f0826909e86605b7f24ba93c455b_359	4d8fdf303c55f8e586b180af2243e275_361	2900b96dbbdb35d877a57143d080ad95_371	K_pneumoniae_3_02505
WP_002889629.1		endonuclease/exonuclease/phosphatase family protein	5	5	1	1	7332	40	30		797	806	798	9645baa8bb46fe9f9ffaa8fccfada4b3_8023		7073f0826909e86605b7f24ba93c455b_8333	4d8fdf303c55f8e586b180af2243e275_8511	2900b96dbbdb35d877a57143d080ad95_8672	K_pneumoniae_3_00007
dnaQ		DNA polymerase III subunit epsilon	5	5	1	1	7326	40	19		731	740	732	9645baa8bb46fe9f9ffaa8fccfada4b3_8011		7073f0826909e86605b7f24ba93c455b_8321	4d8fdf303c55f8e586b180af2243e275_8499	2900b96dbbdb35d877a57143d080ad95_8660	K_pneumoniae_3_00013
avtA		valine--pyruvate transaminase	5	5	1	1	11794	9	19		1256	1256	1256	9645baa8bb46fe9f9ffaa8fccfada4b3_374		7073f0826909e86605b7f24ba93c455b_361	4d8fdf303c55f8e586b180af2243e275_363	2900b96dbbdb35d877a57143d080ad95_373	K_pneumoniae_3_02506
fba		class II fructose-1,6-bisphosphate aldolase	5	5	1	1	7472	71	11		854	860	855	9645baa8bb46fe9f9ffaa8fccfada4b3_7755		7073f0826909e86605b7f24ba93c455b_8059	4d8fdf303c55f8e586b180af2243e275_8235	2900b96dbbdb35d877a57143d080ad95_8388	K_pneumoniae_3_00128
WP_004191476.1		LacI family DNA-binding transcriptional regulator	5	5	1	1	5692	1	2415		1019	1034	1022	9645baa8bb46fe9f9ffaa8fccfada4b3_7418		7073f0826909e86605b7f24ba93c455b_7734	4d8fdf303c55f8e586b180af2243e275_7768	2900b96dbbdb35d877a57143d080ad95_7915	K_pneumoniae_3_00283
WP_004901315.1		alpha-amylase	5	5	1	1	11795	9	18		2033	2033	2033	9645baa8bb46fe9f9ffaa8fccfada4b3_376		7073f0826909e86605b7f24ba93c455b_363	4d8fdf303c55f8e586b180af2243e275_365	2900b96dbbdb35d877a57143d080ad95_375	K_pneumoniae_3_02507
WP_004152946.1		ABC transporter permease	5	5	1	1	5689	1	2412		1022	1031	1023	9645baa8bb46fe9f9ffaa8fccfada4b3_7412		7073f0826909e86605b7f24ba93c455b_7728	4d8fdf303c55f8e586b180af2243e275_7762	2900b96dbbdb35d877a57143d080ad95_7909	K_pneumoniae_3_00286
entA		2,3-dihydro-2,3-dihydroxybenzoate dehydrogenase EntA	5	5	1	1	4387	12	47		746	755	747	9645baa8bb46fe9f9ffaa8fccfada4b3_7174		7073f0826909e86605b7f24ba93c455b_7513	4d8fdf303c55f8e586b180af2243e275_7538	2900b96dbbdb35d877a57143d080ad95_7675	K_pneumoniae_3_00389
WP_072145327.1		pyridoxal phosphate-dependent aminotransferase	5	5	1	1	4334	12	16		1145	1160	1148	9645baa8bb46fe9f9ffaa8fccfada4b3_7110		7073f0826909e86605b7f24ba93c455b_7449	4d8fdf303c55f8e586b180af2243e275_7471	2900b96dbbdb35d877a57143d080ad95_7591	K_pneumoniae_3_00421
holA		DNA polymerase III subunit delta	5	5	1	1	2930	127	6		1031	1034	1031	9645baa8bb46fe9f9ffaa8fccfada4b3_7054		7073f0826909e86605b7f24ba93c455b_7393	4d8fdf303c55f8e586b180af2243e275_7415	2900b96dbbdb35d877a57143d080ad95_7535	K_pneumoniae_3_00449
WP_002894699.1		zinc ribbon-containing protein	5	5	1	1	2942	123	1		482	485	482	9645baa8bb46fe9f9ffaa8fccfada4b3_7048		7073f0826909e86605b7f24ba93c455b_7387	4d8fdf303c55f8e586b180af2243e275_7409	2900b96dbbdb35d877a57143d080ad95_7529	K_pneumoniae_3_00452
WP_002922351.1		XylR family transcriptional regulator	5	5	1	1	11797	9	16		1178	1178	1178	9645baa8bb46fe9f9ffaa8fccfada4b3_380		7073f0826909e86605b7f24ba93c455b_367	4d8fdf303c55f8e586b180af2243e275_369	2900b96dbbdb35d877a57143d080ad95_379	K_pneumoniae_3_02509
dacC		serine-type D-Ala-D-Ala carboxypeptidase	5	5	1	1	545	20	25		1202	1211	1203	9645baa8bb46fe9f9ffaa8fccfada4b3_6615		7073f0826909e86605b7f24ba93c455b_6972	4d8fdf303c55f8e586b180af2243e275_6994	2900b96dbbdb35d877a57143d080ad95_7108	K_pneumoniae_3_00648
WP_002898209.1		Lrp/AsnC family transcriptional regulator	5	5	1	1	946	64	11		461	464	461	9645baa8bb46fe9f9ffaa8fccfada4b3_6435		7073f0826909e86605b7f24ba93c455b_6792	4d8fdf303c55f8e586b180af2243e275_6818	2900b96dbbdb35d877a57143d080ad95_6932	K_pneumoniae_3_00737
WP_002922349.1		sugar ABC transporter permease	5	5	1	1	11798	9	15		1181	1181	1181	9645baa8bb46fe9f9ffaa8fccfada4b3_382		7073f0826909e86605b7f24ba93c455b_369	4d8fdf303c55f8e586b180af2243e275_371	2900b96dbbdb35d877a57143d080ad95_381	K_pneumoniae_3_02510
puuD		gamma-glutamyl-gamma-aminobutyrate hydrolase	5	5	1	1	1003	1	1169		752	764	754	9645baa8bb46fe9f9ffaa8fccfada4b3_6328		7073f0826909e86605b7f24ba93c455b_6647	4d8fdf303c55f8e586b180af2243e275_6694	2900b96dbbdb35d877a57143d080ad95_6827	K_pneumoniae_3_00796
WP_004140718.1		Gfo/Idh/MocA family oxidoreductase	5	5	1	1	1187	32	8		911	923	913	9645baa8bb46fe9f9ffaa8fccfada4b3_6201		7073f0826909e86605b7f24ba93c455b_6524	4d8fdf303c55f8e586b180af2243e275_6571	2900b96dbbdb35d877a57143d080ad95_6702	K_pneumoniae_3_00855
lpoB		penicillin-binding protein activator LpoB	5	5	1	1	502	50	3		638	647	639	9645baa8bb46fe9f9ffaa8fccfada4b3_6155		7073f0826909e86605b7f24ba93c455b_6478	4d8fdf303c55f8e586b180af2243e275_6525	2900b96dbbdb35d877a57143d080ad95_6656	K_pneumoniae_3_00878
nagZ		beta-N-acetylhexosaminidase	5	5	1	1	500	50	5		1010	1022	1012	9645baa8bb46fe9f9ffaa8fccfada4b3_6151		7073f0826909e86605b7f24ba93c455b_6474	4d8fdf303c55f8e586b180af2243e275_6521	2900b96dbbdb35d877a57143d080ad95_6652	K_pneumoniae_3_00880
WP_004211823.1		triose-phosphate isomerase	5	5	1	1	481	50	25		794	797	794	9645baa8bb46fe9f9ffaa8fccfada4b3_6113		7073f0826909e86605b7f24ba93c455b_6436	4d8fdf303c55f8e586b180af2243e275_6483	2900b96dbbdb35d877a57143d080ad95_6614	K_pneumoniae_3_00896
WP_002922346.1		xylose ABC transporter ATP-binding protein	5	5	1	1	11799	9	14		1541	1541	1541	9645baa8bb46fe9f9ffaa8fccfada4b3_384		7073f0826909e86605b7f24ba93c455b_371	4d8fdf303c55f8e586b180af2243e275_373	2900b96dbbdb35d877a57143d080ad95_383	K_pneumoniae_3_02511
WP_002910080.1		ion transporter	5	5	1	1	1972	89	3		827	833	828	9645baa8bb46fe9f9ffaa8fccfada4b3_3969		7073f0826909e86605b7f24ba93c455b_4022	4d8fdf303c55f8e586b180af2243e275_4359	2900b96dbbdb35d877a57143d080ad95_4285	K_pneumoniae_3_01042
ispE		4-(cytidine 5'-diphospho)-2-C-methyl-D-erythritol kinase	5	5	1	1	1954	146	5		848	851	848	9645baa8bb46fe9f9ffaa8fccfada4b3_3862		7073f0826909e86605b7f24ba93c455b_3909	4d8fdf303c55f8e586b180af2243e275_4246	2900b96dbbdb35d877a57143d080ad95_4171	K_pneumoniae_3_01087
WP_004189329.1		branched-chain amino acid ABC transporter substrate-binding protein	5	5	1	1	5806	22	36		1058	1064	1059	9645baa8bb46fe9f9ffaa8fccfada4b3_3762		7073f0826909e86605b7f24ba93c455b_3815	4d8fdf303c55f8e586b180af2243e275_4017	2900b96dbbdb35d877a57143d080ad95_3931	K_pneumoniae_3_01126
fadD		long-chain-fatty-acid--CoA ligase FadD	5	5	1	1	6117	63	18		1685	1718	1691	9645baa8bb46fe9f9ffaa8fccfada4b3_3688		7073f0826909e86605b7f24ba93c455b_3741	4d8fdf303c55f8e586b180af2243e275_3945	2900b96dbbdb35d877a57143d080ad95_3859	K_pneumoniae_3_01159
xylF		D-xylose ABC transporter substrate-binding protein	5	5	1	1	11800	9	13		995	995	995	9645baa8bb46fe9f9ffaa8fccfada4b3_386		7073f0826909e86605b7f24ba93c455b_373	4d8fdf303c55f8e586b180af2243e275_375	2900b96dbbdb35d877a57143d080ad95_385	K_pneumoniae_3_02512
WP_002911589.1		DUF2525 domain-containing protein	5	5	1	1	5617	1	2153		221	224	221	9645baa8bb46fe9f9ffaa8fccfada4b3_3469		7073f0826909e86605b7f24ba93c455b_3522	4d8fdf303c55f8e586b180af2243e275_3726	2900b96dbbdb35d877a57143d080ad95_3634	K_pneumoniae_3_01261
WP_004200342.1		very short patch repair endonuclease	5	5	1	1	5621	1	2157		494	497	494	9645baa8bb46fe9f9ffaa8fccfada4b3_3461		7073f0826909e86605b7f24ba93c455b_3514	4d8fdf303c55f8e586b180af2243e275_3718	2900b96dbbdb35d877a57143d080ad95_3626	K_pneumoniae_3_01265
WP_223174639.1		oxidoreductase	5	5	1	1	6605	1	1691		962	977	965	9645baa8bb46fe9f9ffaa8fccfada4b3_3426		7073f0826909e86605b7f24ba93c455b_3479	4d8fdf303c55f8e586b180af2243e275_3581	2900b96dbbdb35d877a57143d080ad95_3474	K_pneumoniae_3_01282
xylA		xylose isomerase	5	5	1	1	11787	9	12		1322	1322	1322	9645baa8bb46fe9f9ffaa8fccfada4b3_388		7073f0826909e86605b7f24ba93c455b_375	4d8fdf303c55f8e586b180af2243e275_377	2900b96dbbdb35d877a57143d080ad95_387	K_pneumoniae_3_02513
xylB		xylulokinase	5	5	1	1	11786	9	11		1454	1454	1454	9645baa8bb46fe9f9ffaa8fccfada4b3_390		7073f0826909e86605b7f24ba93c455b_377	4d8fdf303c55f8e586b180af2243e275_379	2900b96dbbdb35d877a57143d080ad95_389	K_pneumoniae_3_02514
WP_002913045.1		MFS transporter	5	5	1	1	4899	122	1		1289	1292	1289	9645baa8bb46fe9f9ffaa8fccfada4b3_2997		7073f0826909e86605b7f24ba93c455b_3064	4d8fdf303c55f8e586b180af2243e275_3156	2900b96dbbdb35d877a57143d080ad95_3047	K_pneumoniae_3_01486
WP_004181516.1		hypothetical protein	5	5	1	1	11785	9	10		371	371	371	9645baa8bb46fe9f9ffaa8fccfada4b3_392		7073f0826909e86605b7f24ba93c455b_379	4d8fdf303c55f8e586b180af2243e275_381	2900b96dbbdb35d877a57143d080ad95_391	K_pneumoniae_3_02515
WP_004188180.1		YiaB family inner membrane protein	5	5	1	1	11784	9	9		443	446	445	9645baa8bb46fe9f9ffaa8fccfada4b3_394		7073f0826909e86605b7f24ba93c455b_381	4d8fdf303c55f8e586b180af2243e275_383	2900b96dbbdb35d877a57143d080ad95_393	K_pneumoniae_3_02516
WP_016946692.1		acyltransferase	5	5	1	1	11783	9	8		995	995	995	9645baa8bb46fe9f9ffaa8fccfada4b3_396		7073f0826909e86605b7f24ba93c455b_383	4d8fdf303c55f8e586b180af2243e275_385	2900b96dbbdb35d877a57143d080ad95_395	K_pneumoniae_3_02517
mltC		membrane-bound lytic murein transglycosylase MltC	5	5	1	1	9814	6	34		1082	1085	1082	9645baa8bb46fe9f9ffaa8fccfada4b3_1457		7073f0826909e86605b7f24ba93c455b_1571	4d8fdf303c55f8e586b180af2243e275_1550	2900b96dbbdb35d877a57143d080ad95_1462	K_pneumoniae_3_02051
glyS		glycine--tRNA ligase subunit beta	5	5	1	1	11780	174	2		2069	2069	2069	9645baa8bb46fe9f9ffaa8fccfada4b3_402		7073f0826909e86605b7f24ba93c455b_389	4d8fdf303c55f8e586b180af2243e275_391	2900b96dbbdb35d877a57143d080ad95_401	K_pneumoniae_3_02520
WP_002916486.1		YecA family protein	5	5	1	1	10825	1	975		578	584	579	9645baa8bb46fe9f9ffaa8fccfada4b3_1574		7073f0826909e86605b7f24ba93c455b_1680	4d8fdf303c55f8e586b180af2243e275_1665	2900b96dbbdb35d877a57143d080ad95_1551	K_pneumoniae_3_02090
WP_109224343.1		fimbrial protein	5	5	1	1	10882	1	3039		902	908	904	9645baa8bb46fe9f9ffaa8fccfada4b3_1679		7073f0826909e86605b7f24ba93c455b_1793	4d8fdf303c55f8e586b180af2243e275_1799	2900b96dbbdb35d877a57143d080ad95_1653	K_pneumoniae_3_02140
WP_024622945.1		glycoside hydrolase family 32 protein	5	5	1	1	11034	5	25		1433	1436	1433	9645baa8bb46fe9f9ffaa8fccfada4b3_1745		7073f0826909e86605b7f24ba93c455b_1859	4d8fdf303c55f8e586b180af2243e275_1871	2900b96dbbdb35d877a57143d080ad95_1719	K_pneumoniae_3_02172
WP_004229436.1		LacI family DNA-binding transcriptional regulator	5	5	1	1	11044	5	35		1001	1010	1002	9645baa8bb46fe9f9ffaa8fccfada4b3_1765		7073f0826909e86605b7f24ba93c455b_1879	4d8fdf303c55f8e586b180af2243e275_1891	2900b96dbbdb35d877a57143d080ad95_1739	K_pneumoniae_3_02182
uhpB		signal transduction histidine-protein kinase/phosphatase UhpB	5	5	1	1	6731	53	2		1481	1502	1485	9645baa8bb46fe9f9ffaa8fccfada4b3_76		7073f0826909e86605b7f24ba93c455b_78	4d8fdf303c55f8e586b180af2243e275_78	2900b96dbbdb35d877a57143d080ad95_78	K_pneumoniae_3_02362
WP_002923154.1		LacI family transcriptional regulator	5	5	1	1	6842	14	4		941	944	941	9645baa8bb46fe9f9ffaa8fccfada4b3_112		7073f0826909e86605b7f24ba93c455b_114	4d8fdf303c55f8e586b180af2243e275_114	2900b96dbbdb35d877a57143d080ad95_114	K_pneumoniae_3_02380
coaBC		bifunctional phosphopantothenoylcysteine decarboxylase/phosphopantothenate--cysteine ligase CoaBC	5	5	1	1	9191	175	3		1214	1217	1214	9645baa8bb46fe9f9ffaa8fccfada4b3_284		7073f0826909e86605b7f24ba93c455b_269	4d8fdf303c55f8e586b180af2243e275_271	2900b96dbbdb35d877a57143d080ad95_281	K_pneumoniae_3_02454
hokA		type I toxin-antitoxin system toxin HokA	5	5	1	1	68	174	4		152	152	152	9645baa8bb46fe9f9ffaa8fccfada4b3_404		7073f0826909e86605b7f24ba93c455b_391	4d8fdf303c55f8e586b180af2243e275_398	2900b96dbbdb35d877a57143d080ad95_403	K_pneumoniae_3_02521
WP_002922129.1		YsaB family lipoprotein	5	5	1	1	11782	9	7		299	302	299	9645baa8bb46fe9f9ffaa8fccfada4b3_398		7073f0826909e86605b7f24ba93c455b_385	4d8fdf303c55f8e586b180af2243e275_387	2900b96dbbdb35d877a57143d080ad95_397	K_pneumoniae_3_02518
WP_023284385.1		ATP-binding cassette domain-containing protein	5	5	1	1	69	174	3		1619	1619	1619	9645baa8bb46fe9f9ffaa8fccfada4b3_406		7073f0826909e86605b7f24ba93c455b_393	4d8fdf303c55f8e586b180af2243e275_400	2900b96dbbdb35d877a57143d080ad95_405	K_pneumoniae_3_02522
WP_002921931.1		HTH-type transcriptional regulator	5	5	1	1	70	62	7		290	290	290	9645baa8bb46fe9f9ffaa8fccfada4b3_410		7073f0826909e86605b7f24ba93c455b_397	4d8fdf303c55f8e586b180af2243e275_404	2900b96dbbdb35d877a57143d080ad95_409	K_pneumoniae_3_02524
pspG		envelope stress response protein PspG	5	5	1	1	7806	81	4		242	242	242	9645baa8bb46fe9f9ffaa8fccfada4b3_9374		7073f0826909e86605b7f24ba93c455b_9659	4d8fdf303c55f8e586b180af2243e275_9892	2900b96dbbdb35d877a57143d080ad95_9978	K_pneumoniae_3_04498
WP_004188196.1		aromatic acid/H+ symport family MFS transporter	5	5	1	1	71	62	8		1355	1355	1355	9645baa8bb46fe9f9ffaa8fccfada4b3_412		7073f0826909e86605b7f24ba93c455b_399	4d8fdf303c55f8e586b180af2243e275_406	2900b96dbbdb35d877a57143d080ad95_411	K_pneumoniae_3_02525
WP_002921929.1		DUF3053 domain-containing protein	5	5	1	1	72	62	9		710	710	710	9645baa8bb46fe9f9ffaa8fccfada4b3_414		7073f0826909e86605b7f24ba93c455b_401	4d8fdf303c55f8e586b180af2243e275_408	2900b96dbbdb35d877a57143d080ad95_413	K_pneumoniae_3_02526
ghrB		glyoxylate/hydroxypyruvate reductase GhrB	5	5	1	1	73	62	10		971	971	971	9645baa8bb46fe9f9ffaa8fccfada4b3_416		7073f0826909e86605b7f24ba93c455b_403	4d8fdf303c55f8e586b180af2243e275_410	2900b96dbbdb35d877a57143d080ad95_415	K_pneumoniae_3_02527
osmB		osmotically-inducible lipoprotein OsmB	5	5	1	1	7240	1	1460		218	221	218	9645baa8bb46fe9f9ffaa8fccfada4b3_5765		7073f0826909e86605b7f24ba93c455b_5945	4d8fdf303c55f8e586b180af2243e275_5960	2900b96dbbdb35d877a57143d080ad95_6071	K_pneumoniae_3_02908
WP_014907796.1		glycosyltransferase family 9 protein	5	5	1	1	7099	15	14		1136	1139	1136	9645baa8bb46fe9f9ffaa8fccfada4b3_5968		7073f0826909e86605b7f24ba93c455b_6156	4d8fdf303c55f8e586b180af2243e275_6301	2900b96dbbdb35d877a57143d080ad95_6290	K_pneumoniae_3_03011
WP_020324105.1		CynX/NimT family MFS transporter	5	5	1	1	7094	15	91		1175	1184	1176	9645baa8bb46fe9f9ffaa8fccfada4b3_5978		7073f0826909e86605b7f24ba93c455b_6166	4d8fdf303c55f8e586b180af2243e275_6311	2900b96dbbdb35d877a57143d080ad95_6300	K_pneumoniae_3_03015
WP_002921927.1		MFS transporter	5	5	1	1	74	62	11		1280	1280	1280	9645baa8bb46fe9f9ffaa8fccfada4b3_418		7073f0826909e86605b7f24ba93c455b_405	4d8fdf303c55f8e586b180af2243e275_412	2900b96dbbdb35d877a57143d080ad95_417	K_pneumoniae_3_02528
WP_002921921.1		sugar kinase	5	5	1	1	75	62	12		935	935	935	9645baa8bb46fe9f9ffaa8fccfada4b3_420		7073f0826909e86605b7f24ba93c455b_407	4d8fdf303c55f8e586b180af2243e275_414	2900b96dbbdb35d877a57143d080ad95_419	K_pneumoniae_3_02529
WP_002921919.1		hypothetical protein	5	5	1	1	76	62	13		749	749	749	9645baa8bb46fe9f9ffaa8fccfada4b3_422		7073f0826909e86605b7f24ba93c455b_409	4d8fdf303c55f8e586b180af2243e275_416	2900b96dbbdb35d877a57143d080ad95_421	K_pneumoniae_3_02530
WP_002921918.1		LacI family DNA-binding transcriptional regulator	5	5	1	1	77	62	14		1016	1016	1016	9645baa8bb46fe9f9ffaa8fccfada4b3_424		7073f0826909e86605b7f24ba93c455b_411	4d8fdf303c55f8e586b180af2243e275_418	2900b96dbbdb35d877a57143d080ad95_423	K_pneumoniae_3_02531
ileS		isoleucine--tRNA ligase	5	5	1	1	7983	26	29		2816	2852	2823	9645baa8bb46fe9f9ffaa8fccfada4b3_8450		7073f0826909e86605b7f24ba93c455b_8738	4d8fdf303c55f8e586b180af2243e275_8938	2900b96dbbdb35d877a57143d080ad95_9101	K_pneumoniae_3_03356
WP_002921917.1		OmpA family lipoprotein	5	5	1	1	78	62	15		662	662	662	9645baa8bb46fe9f9ffaa8fccfada4b3_426		7073f0826909e86605b7f24ba93c455b_413	4d8fdf303c55f8e586b180af2243e275_420	2900b96dbbdb35d877a57143d080ad95_425	K_pneumoniae_3_02532
dnaC		DNA replication protein DnaC	5	5	1	1	2846	4	23		737	743	738	9645baa8bb46fe9f9ffaa8fccfada4b3_8592		7073f0826909e86605b7f24ba93c455b_8880	4d8fdf303c55f8e586b180af2243e275_9100	2900b96dbbdb35d877a57143d080ad95_9241	K_pneumoniae_3_03421
WP_023342579.1		molybdopterin guanine dinucleotide-containing S/N-oxide reductase	5	5	1	1	79	62	16		2330	2330	2330	9645baa8bb46fe9f9ffaa8fccfada4b3_428		7073f0826909e86605b7f24ba93c455b_415	4d8fdf303c55f8e586b180af2243e275_422	2900b96dbbdb35d877a57143d080ad95_427	K_pneumoniae_3_02533
rsxG		electron transport complex subunit RsxG	5	5	1	1	102	51	13		620	623	620	9645baa8bb46fe9f9ffaa8fccfada4b3_4470		7073f0826909e86605b7f24ba93c455b_4645	4d8fdf303c55f8e586b180af2243e275_4808	2900b96dbbdb35d877a57143d080ad95_4758	K_pneumoniae_3_03736
pdxH		pyridoxamine 5'-phosphate oxidase	5	5	1	1	95	51	20		656	662	657	9645baa8bb46fe9f9ffaa8fccfada4b3_4456		7073f0826909e86605b7f24ba93c455b_4631	4d8fdf303c55f8e586b180af2243e275_4794	2900b96dbbdb35d877a57143d080ad95_4744	K_pneumoniae_3_03744
WP_004217626.1		ABC transporter permease	5	5	1	1	2415	58	17		659	671	661	9645baa8bb46fe9f9ffaa8fccfada4b3_5111		7073f0826909e86605b7f24ba93c455b_5319	4d8fdf303c55f8e586b180af2243e275_5346	2900b96dbbdb35d877a57143d080ad95_5445	K_pneumoniae_3_03911
WP_004173935.1		N-acetyltransferase	5	5	1	1	80	62	17		440	440	440	9645baa8bb46fe9f9ffaa8fccfada4b3_430		7073f0826909e86605b7f24ba93c455b_417	4d8fdf303c55f8e586b180af2243e275_424	2900b96dbbdb35d877a57143d080ad95_429	K_pneumoniae_3_02534
WP_004205985.1		DUF4177 domain-containing protein	5	5	1	1	2463	2	94		215	218	215	9645baa8bb46fe9f9ffaa8fccfada4b3_5205		7073f0826909e86605b7f24ba93c455b_5399	4d8fdf303c55f8e586b180af2243e275_5444	2900b96dbbdb35d877a57143d080ad95_5535	K_pneumoniae_3_03950
WP_020802919.1		helix-turn-helix domain-containing protein	5	5	1	1	2477	2	80		926	941	929	9645baa8bb46fe9f9ffaa8fccfada4b3_5233		7073f0826909e86605b7f24ba93c455b_5427	4d8fdf303c55f8e586b180af2243e275_5472	2900b96dbbdb35d877a57143d080ad95_5563	K_pneumoniae_3_03964
WP_002903701.1		ROK family transcriptional regulator	5	5	1	1	2511	2	49		1220	1223	1220	9645baa8bb46fe9f9ffaa8fccfada4b3_5297		7073f0826909e86605b7f24ba93c455b_5489	4d8fdf303c55f8e586b180af2243e275_5534	2900b96dbbdb35d877a57143d080ad95_5627	K_pneumoniae_3_03992
nlhH		alpha/beta hydrolase	5	5	1	1	10176	29	34		917	917	917	9645baa8bb46fe9f9ffaa8fccfada4b3_9950		7073f0826909e86605b7f24ba93c455b_10168	4d8fdf303c55f8e586b180af2243e275_10444	2900b96dbbdb35d877a57143d080ad95_10494	K_pneumoniae_3_04704
tag		DNA-3-methyladenine glycosylase I	5	5	1	1	81	62	18		581	581	581	9645baa8bb46fe9f9ffaa8fccfada4b3_432		7073f0826909e86605b7f24ba93c455b_419	4d8fdf303c55f8e586b180af2243e275_426	2900b96dbbdb35d877a57143d080ad95_431	K_pneumoniae_3_02535
WP_004193671.1		helix-turn-helix domain-containing protein	5	5	1	1	8883	8	123		362	365	362	9645baa8bb46fe9f9ffaa8fccfada4b3_2324		7073f0826909e86605b7f24ba93c455b_2442	4d8fdf303c55f8e586b180af2243e275_2482	2900b96dbbdb35d877a57143d080ad95_2296	K_pneumoniae_3_04168
group_11505	cysG	siroheme synthase CysG	5	5	1	1	11268	163	1		1406	1415	1407	9645baa8bb46fe9f9ffaa8fccfada4b3_2025		7073f0826909e86605b7f24ba93c455b_2137	4d8fdf303c55f8e586b180af2243e275_2149	2900b96dbbdb35d877a57143d080ad95_1997	K_pneumoniae_3_04313
WP_004174643.1		aminopeptidase	5	5	1	1	11269	163	2		1046	1055	1047	9645baa8bb46fe9f9ffaa8fccfada4b3_2023		7073f0826909e86605b7f24ba93c455b_2135	4d8fdf303c55f8e586b180af2243e275_2147	2900b96dbbdb35d877a57143d080ad95_1995	K_pneumoniae_3_04314
WP_002921907.1		MFS transporter	5	5	1	1	83	62	20		1205	1205	1205	9645baa8bb46fe9f9ffaa8fccfada4b3_436		7073f0826909e86605b7f24ba93c455b_423	4d8fdf303c55f8e586b180af2243e275_430	2900b96dbbdb35d877a57143d080ad95_435	K_pneumoniae_3_02537
eptB		kdo(2)-lipid A phosphoethanolamine 7''-transferase	5	5	1	1	84	62	6		1673	1673	1673	9645baa8bb46fe9f9ffaa8fccfada4b3_438		7073f0826909e86605b7f24ba93c455b_425	4d8fdf303c55f8e586b180af2243e275_432	2900b96dbbdb35d877a57143d080ad95_437	K_pneumoniae_3_02538
WP_004214574.1		ankyrin repeat domain-containing protein	5	5	1	1	85	62	5		1394	1394	1394	9645baa8bb46fe9f9ffaa8fccfada4b3_440		7073f0826909e86605b7f24ba93c455b_427	4d8fdf303c55f8e586b180af2243e275_434	2900b96dbbdb35d877a57143d080ad95_439	K_pneumoniae_3_02539
WP_002921789.1		ABC transporter substrate-binding protein	5	5	1	1	86	62	4		1607	1607	1607	9645baa8bb46fe9f9ffaa8fccfada4b3_454		7073f0826909e86605b7f24ba93c455b_435	4d8fdf303c55f8e586b180af2243e275_439	2900b96dbbdb35d877a57143d080ad95_447	K_pneumoniae_3_02541
WP_004153321.1		MFS transporter	5	5	1	1	6803	1	2670		1439	1454	1442	9645baa8bb46fe9f9ffaa8fccfada4b3_8818		7073f0826909e86605b7f24ba93c455b_9084	4d8fdf303c55f8e586b180af2243e275_9307	2900b96dbbdb35d877a57143d080ad95_9449	K_pneumoniae_3_04437
aceA		isocitrate lyase	5	5	1	1	7677	33	38		1304	1319	1307	9645baa8bb46fe9f9ffaa8fccfada4b3_9458		7073f0826909e86605b7f24ba93c455b_9730	4d8fdf303c55f8e586b180af2243e275_9962	2900b96dbbdb35d877a57143d080ad95_10048	K_pneumoniae_3_04464
WP_004151742.1		ribonuclease Z	5	5	1	1	6879	1	536		758	770	760	9645baa8bb46fe9f9ffaa8fccfada4b3_9336		7073f0826909e86605b7f24ba93c455b_9621	4d8fdf303c55f8e586b180af2243e275_9854	2900b96dbbdb35d877a57143d080ad95_9940	K_pneumoniae_3_04516
actP		cation/acetate symporter ActP	5	5	1	1	9851	1	556		1652	1655	1652	9645baa8bb46fe9f9ffaa8fccfada4b3_9296		7073f0826909e86605b7f24ba93c455b_9581	4d8fdf303c55f8e586b180af2243e275_9814	2900b96dbbdb35d877a57143d080ad95_9900	K_pneumoniae_3_04536
dppB		dipeptide ABC transporter permease DppB	5	5	1	1	87	62	3		1019	1019	1019	9645baa8bb46fe9f9ffaa8fccfada4b3_456		7073f0826909e86605b7f24ba93c455b_437	4d8fdf303c55f8e586b180af2243e275_441	2900b96dbbdb35d877a57143d080ad95_449	K_pneumoniae_3_02542
hemC		hydroxymethylbilane synthase	5	5	1	1	10216	70	2		941	956	944	9645baa8bb46fe9f9ffaa8fccfada4b3_9706		7073f0826909e86605b7f24ba93c455b_9926	4d8fdf303c55f8e586b180af2243e275_10158	2900b96dbbdb35d877a57143d080ad95_10254	K_pneumoniae_3_04821
dppD		dipeptide ABC transporter ATP-binding protein	5	5	1	1	89	62	1		983	983	983	9645baa8bb46fe9f9ffaa8fccfada4b3_460		7073f0826909e86605b7f24ba93c455b_441	4d8fdf303c55f8e586b180af2243e275_445	2900b96dbbdb35d877a57143d080ad95_453	K_pneumoniae_3_02544
group_1157	bcsA	UDP-forming cellulose synthase catalytic subunit	5	5	1	1	11609	37	29		2102	2111	2109	9645baa8bb46fe9f9ffaa8fccfada4b3_470		7073f0826909e86605b7f24ba93c455b_451	4d8fdf303c55f8e586b180af2243e275_455	2900b96dbbdb35d877a57143d080ad95_463	K_pneumoniae_3_02548
bepA_2		cellulose biosynthesis protein BcsC	5	5	1	1	11611	37	31		4049	4052	4051	9645baa8bb46fe9f9ffaa8fccfada4b3_474		7073f0826909e86605b7f24ba93c455b_455	4d8fdf303c55f8e586b180af2243e275_459	2900b96dbbdb35d877a57143d080ad95_467	K_pneumoniae_3_02550
WP_002921529.1		hypothetical protein	5	5	1	1	11612	37	32		476	476	476	9645baa8bb46fe9f9ffaa8fccfada4b3_476		7073f0826909e86605b7f24ba93c455b_457	4d8fdf303c55f8e586b180af2243e275_461	2900b96dbbdb35d877a57143d080ad95_469	K_pneumoniae_3_02551
WP_002921526.1		endoglucanase	5	5	1	1	11613	37	33		1001	1001	1001	9645baa8bb46fe9f9ffaa8fccfada4b3_478		7073f0826909e86605b7f24ba93c455b_459	4d8fdf303c55f8e586b180af2243e275_463	2900b96dbbdb35d877a57143d080ad95_471	K_pneumoniae_3_02552
bcsG		cellulose biosynthesis protein BcsG	5	5	1	1	11614	37	34		1667	1679	1676	9645baa8bb46fe9f9ffaa8fccfada4b3_480		7073f0826909e86605b7f24ba93c455b_461	4d8fdf303c55f8e586b180af2243e275_465	2900b96dbbdb35d877a57143d080ad95_473	K_pneumoniae_3_02553
bcsF		cellulose biosynthesis protein BcsF	5	5	1	1	11615	37	25		197	197	197	9645baa8bb46fe9f9ffaa8fccfada4b3_482		7073f0826909e86605b7f24ba93c455b_463	4d8fdf303c55f8e586b180af2243e275_467	2900b96dbbdb35d877a57143d080ad95_475	K_pneumoniae_3_02554
bcsE		cellulose biosynthesis protein BcsE	5	5	1	1	11616	37	24		1553	1553	1553	9645baa8bb46fe9f9ffaa8fccfada4b3_484		7073f0826909e86605b7f24ba93c455b_465	4d8fdf303c55f8e586b180af2243e275_469	2900b96dbbdb35d877a57143d080ad95_477	K_pneumoniae_3_02555
WP_002921513.1		YhjR family protein	5	5	1	1	11617	37	23		188	188	188	9645baa8bb46fe9f9ffaa8fccfada4b3_486		7073f0826909e86605b7f24ba93c455b_467	4d8fdf303c55f8e586b180af2243e275_471	2900b96dbbdb35d877a57143d080ad95_479	K_pneumoniae_3_02556
bcsQ		cellulose biosynthesis protein BcsQ	5	5	1	1	11618	37	22		731	731	731	9645baa8bb46fe9f9ffaa8fccfada4b3_488		7073f0826909e86605b7f24ba93c455b_469	4d8fdf303c55f8e586b180af2243e275_473	2900b96dbbdb35d877a57143d080ad95_481	K_pneumoniae_3_02557
bcsA		UDP-forming cellulose synthase catalytic subunit	5	5	1	1	11619	37	21		2618	2618	2618	9645baa8bb46fe9f9ffaa8fccfada4b3_490		7073f0826909e86605b7f24ba93c455b_471	4d8fdf303c55f8e586b180af2243e275_475	2900b96dbbdb35d877a57143d080ad95_483	K_pneumoniae_3_02558
bcsB		cellulose biosynthesis cyclic di-GMP-binding regulatory protein BcsB	5	5	1	1	11620	37	20		2303	2345	2336	9645baa8bb46fe9f9ffaa8fccfada4b3_492		7073f0826909e86605b7f24ba93c455b_473	4d8fdf303c55f8e586b180af2243e275_477	2900b96dbbdb35d877a57143d080ad95_485	K_pneumoniae_3_02559
bcsZ		cellulase	5	5	1	1	11621	37	19		1094	1109	1106	9645baa8bb46fe9f9ffaa8fccfada4b3_494		7073f0826909e86605b7f24ba93c455b_475	4d8fdf303c55f8e586b180af2243e275_479	2900b96dbbdb35d877a57143d080ad95_487	K_pneumoniae_3_02560
bcsC		cellulose biosynthesis protein BcsC	5	5	1	1	11622	37	18		3479	3479	3479	9645baa8bb46fe9f9ffaa8fccfada4b3_496		7073f0826909e86605b7f24ba93c455b_477	4d8fdf303c55f8e586b180af2243e275_481	2900b96dbbdb35d877a57143d080ad95_489	K_pneumoniae_3_02561
hmsP		biofilm formation regulator HmsP	5	5	1	1	11623	37	17		2006	2006	2006	9645baa8bb46fe9f9ffaa8fccfada4b3_498		7073f0826909e86605b7f24ba93c455b_479	4d8fdf303c55f8e586b180af2243e275_483	2900b96dbbdb35d877a57143d080ad95_491	K_pneumoniae_3_02562
WP_002921436.1		insulinase family protein	5	5	1	1	11625	37	15		1502	1502	1502	9645baa8bb46fe9f9ffaa8fccfada4b3_502		7073f0826909e86605b7f24ba93c455b_483	4d8fdf303c55f8e586b180af2243e275_487	2900b96dbbdb35d877a57143d080ad95_495	K_pneumoniae_3_02564
WP_002921434.1		sugar kinase	5	5	1	1	11626	37	14		929	929	929	9645baa8bb46fe9f9ffaa8fccfada4b3_504		7073f0826909e86605b7f24ba93c455b_485	4d8fdf303c55f8e586b180af2243e275_489	2900b96dbbdb35d877a57143d080ad95_497	K_pneumoniae_3_02565
WP_121592984.1		AsmA family protein	5	5	1	1	11627	37	13		2051	2051	2051	9645baa8bb46fe9f9ffaa8fccfada4b3_506		7073f0826909e86605b7f24ba93c455b_487	4d8fdf303c55f8e586b180af2243e275_491	2900b96dbbdb35d877a57143d080ad95_499	K_pneumoniae_3_02566
WP_004150118.1		MHS family MFS transporter	5	5	1	1	11628	37	12		1322	1322	1322	9645baa8bb46fe9f9ffaa8fccfada4b3_508		7073f0826909e86605b7f24ba93c455b_489	4d8fdf303c55f8e586b180af2243e275_493	2900b96dbbdb35d877a57143d080ad95_501	K_pneumoniae_3_02567
yhjD		inner membrane protein YhjD	5	5	1	1	11629	37	11		1031	1031	1031	9645baa8bb46fe9f9ffaa8fccfada4b3_510		7073f0826909e86605b7f24ba93c455b_491	4d8fdf303c55f8e586b180af2243e275_495	2900b96dbbdb35d877a57143d080ad95_503	K_pneumoniae_3_02568
pheM		pheST operon leader peptide PheM	5	5	1	1	3964	258	1		44	44	44	9645baa8bb46fe9f9ffaa8fccfada4b3_4004	fb55d8fe7cfc5cfebfa700165fb94f7d_782	7073f0826909e86605b7f24ba93c455b_4057	4d8fdf303c55f8e586b180af2243e275_4394	2900b96dbbdb35d877a57143d080ad95_4320
WP_000027057.1		class A broad-spectrum beta-lactamase TEM-1	5	6	1.2	1	4131				860	860	860	9645baa8bb46fe9f9ffaa8fccfada4b3_10488	fb55d8fe7cfc5cfebfa700165fb94f7d_7381 fb55d8fe7cfc5cfebfa700165fb94f7d_10022	7073f0826909e86605b7f24ba93c455b_10467	4d8fdf303c55f8e586b180af2243e275_10615	2900b96dbbdb35d877a57143d080ad95_10898
WP_002921336.1		SDR family oxidoreductase	5	5	1	1	11631	37	9		758	758	758	9645baa8bb46fe9f9ffaa8fccfada4b3_514		7073f0826909e86605b7f24ba93c455b_495	4d8fdf303c55f8e586b180af2243e275_499	2900b96dbbdb35d877a57143d080ad95_507	K_pneumoniae_3_02570
tuf		elongation factor Tu	5	10	2	1	10546				1184	1184	1184	9645baa8bb46fe9f9ffaa8fccfada4b3_812 9645baa8bb46fe9f9ffaa8fccfada4b3_9539		7073f0826909e86605b7f24ba93c455b_788 7073f0826909e86605b7f24ba93c455b_9811	4d8fdf303c55f8e586b180af2243e275_793 4d8fdf303c55f8e586b180af2243e275_10043	2900b96dbbdb35d877a57143d080ad95_803 2900b96dbbdb35d877a57143d080ad95_10129	K_pneumoniae_3_02717 K_pneumoniae_3_04926
WP_172879243.1		GNAT family N-acetyltransferase	5	5	1	1	11632	37	8		533	533	533	9645baa8bb46fe9f9ffaa8fccfada4b3_516		7073f0826909e86605b7f24ba93c455b_497	4d8fdf303c55f8e586b180af2243e275_501	2900b96dbbdb35d877a57143d080ad95_509	K_pneumoniae_3_02571
WP_004181423.1		oxalacetate decarboxylase subunit beta	5	10	2	1	8001				1301	1301	1301	9645baa8bb46fe9f9ffaa8fccfada4b3_999 9645baa8bb46fe9f9ffaa8fccfada4b3_6844 9645baa8bb46fe9f9ffaa8fccfada4b3_8430 9645baa8bb46fe9f9ffaa8fccfada4b3_9646		7073f0826909e86605b7f24ba93c455b_975	4d8fdf303c55f8e586b180af2243e275_986 4d8fdf303c55f8e586b180af2243e275_8918	2900b96dbbdb35d877a57143d080ad95_9081	K_pneumoniae_3_01810 K_pneumoniae_3_03346
treF		alpha,alpha-trehalase	5	5	1	1	11633	37	7		1652	1652	1652	9645baa8bb46fe9f9ffaa8fccfada4b3_518		7073f0826909e86605b7f24ba93c455b_499	4d8fdf303c55f8e586b180af2243e275_503	2900b96dbbdb35d877a57143d080ad95_511	K_pneumoniae_3_02572
WP_001067855.1		IS6-like element IS26 family transposase	5	28	5.6	1	9732				704	704	704	9645baa8bb46fe9f9ffaa8fccfada4b3_10400 9645baa8bb46fe9f9ffaa8fccfada4b3_10412 9645baa8bb46fe9f9ffaa8fccfada4b3_10416 9645baa8bb46fe9f9ffaa8fccfada4b3_10424 9645baa8bb46fe9f9ffaa8fccfada4b3_10466 9645baa8bb46fe9f9ffaa8fccfada4b3_10521	fb55d8fe7cfc5cfebfa700165fb94f7d_7395 fb55d8fe7cfc5cfebfa700165fb94f7d_10018 fb55d8fe7cfc5cfebfa700165fb94f7d_10028 fb55d8fe7cfc5cfebfa700165fb94f7d_10047	7073f0826909e86605b7f24ba93c455b_10379 7073f0826909e86605b7f24ba93c455b_10391 7073f0826909e86605b7f24ba93c455b_10399 7073f0826909e86605b7f24ba93c455b_10403 7073f0826909e86605b7f24ba93c455b_10445 7073f0826909e86605b7f24ba93c455b_10500	4d8fdf303c55f8e586b180af2243e275_10601 4d8fdf303c55f8e586b180af2243e275_10613 4d8fdf303c55f8e586b180af2243e275_10629 4d8fdf303c55f8e586b180af2243e275_10673 4d8fdf303c55f8e586b180af2243e275_10689 4d8fdf303c55f8e586b180af2243e275_10703	2900b96dbbdb35d877a57143d080ad95_10659 2900b96dbbdb35d877a57143d080ad95_10870 2900b96dbbdb35d877a57143d080ad95_10892 2900b96dbbdb35d877a57143d080ad95_11071 2900b96dbbdb35d877a57143d080ad95_11177 2900b96dbbdb35d877a57143d080ad95_11601
sul1		sulfonamide-resistant dihydropteroate synthase Sul1	5	7	1.4	1	8807				839	839	839	9645baa8bb46fe9f9ffaa8fccfada4b3_10438 9645baa8bb46fe9f9ffaa8fccfada4b3_10452	fb55d8fe7cfc5cfebfa700165fb94f7d_7409	7073f0826909e86605b7f24ba93c455b_10417 7073f0826909e86605b7f24ba93c455b_10431	4d8fdf303c55f8e586b180af2243e275_10645		K_pneumoniae_3_05176
WP_004173953.1		glutathione S-transferase	5	5	1	1	11635	37	5		623	623	623	9645baa8bb46fe9f9ffaa8fccfada4b3_522		7073f0826909e86605b7f24ba93c455b_503	4d8fdf303c55f8e586b180af2243e275_507	2900b96dbbdb35d877a57143d080ad95_515	K_pneumoniae_3_02574
dmsB		dimethylsulfoxide reductase subunit B	5	9	1.8	1	2506				617	617	617	9645baa8bb46fe9f9ffaa8fccfada4b3_6497		7073f0826909e86605b7f24ba93c455b_5479 7073f0826909e86605b7f24ba93c455b_6854	4d8fdf303c55f8e586b180af2243e275_5524 4d8fdf303c55f8e586b180af2243e275_6880	2900b96dbbdb35d877a57143d080ad95_5617 2900b96dbbdb35d877a57143d080ad95_6994	K_pneumoniae_3_00705 K_pneumoniae_3_03987
gorA		glutathione-disulfide reductase	5	5	1	1	11636	37	4		1352	1352	1352	9645baa8bb46fe9f9ffaa8fccfada4b3_524		7073f0826909e86605b7f24ba93c455b_505	4d8fdf303c55f8e586b180af2243e275_509	2900b96dbbdb35d877a57143d080ad95_517	K_pneumoniae_3_02575
WP_002921269.1		23S rRNA (adenine(2030)-N(6))-methyltransferase RlmJ	5	5	1	1	11637	37	3		842	842	842	9645baa8bb46fe9f9ffaa8fccfada4b3_526		7073f0826909e86605b7f24ba93c455b_507	4d8fdf303c55f8e586b180af2243e275_511	2900b96dbbdb35d877a57143d080ad95_519	K_pneumoniae_3_02576
tkt		transketolase	5	10	2	1	9779				1991	2006	1997	9645baa8bb46fe9f9ffaa8fccfada4b3_1547 9645baa8bb46fe9f9ffaa8fccfada4b3_6099		7073f0826909e86605b7f24ba93c455b_1653 7073f0826909e86605b7f24ba93c455b_6422	4d8fdf303c55f8e586b180af2243e275_1638 4d8fdf303c55f8e586b180af2243e275_6467	2900b96dbbdb35d877a57143d080ad95_1524 2900b96dbbdb35d877a57143d080ad95_6600	K_pneumoniae_3_00903 K_pneumoniae_3_02078
dtpB		dipeptide/tripeptide permease DtpB	5	5	1	1	11510	243	1		1448	1472	1467	9645baa8bb46fe9f9ffaa8fccfada4b3_534		7073f0826909e86605b7f24ba93c455b_515	4d8fdf303c55f8e586b180af2243e275_519	2900b96dbbdb35d877a57143d080ad95_527	K_pneumoniae_3_02580
pitA		inorganic phosphate transporter PitA	5	5	1	1	11602	38	2		1496	1496	1496	9645baa8bb46fe9f9ffaa8fccfada4b3_540		7073f0826909e86605b7f24ba93c455b_521	4d8fdf303c55f8e586b180af2243e275_525	2900b96dbbdb35d877a57143d080ad95_533	K_pneumoniae_3_02583
WP_004181490.1		magnesium transporter	5	5	1	1	11600	38	4		1013	1013	1013	9645baa8bb46fe9f9ffaa8fccfada4b3_544		7073f0826909e86605b7f24ba93c455b_525	4d8fdf303c55f8e586b180af2243e275_529	2900b96dbbdb35d877a57143d080ad95_537	K_pneumoniae_3_02585
nikR		nickel-responsive transcriptional regulator NikR	5	5	1	1	11512	38	32		398	401	399	9645baa8bb46fe9f9ffaa8fccfada4b3_548		7073f0826909e86605b7f24ba93c455b_528	4d8fdf303c55f8e586b180af2243e275_533	2900b96dbbdb35d877a57143d080ad95_539	K_pneumoniae_3_02586
WP_004173959.1		nickel import ATP-binding protein NikD	5	5	1	1	11514	38	30		764	764	764	9645baa8bb46fe9f9ffaa8fccfada4b3_552		7073f0826909e86605b7f24ba93c455b_532	4d8fdf303c55f8e586b180af2243e275_537	2900b96dbbdb35d877a57143d080ad95_543	K_pneumoniae_3_02588
nikC		nickel ABC transporter permease subunit NikC	5	5	1	1	11515	38	29		833	833	833	9645baa8bb46fe9f9ffaa8fccfada4b3_554		7073f0826909e86605b7f24ba93c455b_534	4d8fdf303c55f8e586b180af2243e275_539	2900b96dbbdb35d877a57143d080ad95_545	K_pneumoniae_3_02589
nikB		nickel ABC transporter permease subunit NikB	5	5	1	1	11516	38	28		944	944	944	9645baa8bb46fe9f9ffaa8fccfada4b3_556		7073f0826909e86605b7f24ba93c455b_536	4d8fdf303c55f8e586b180af2243e275_541	2900b96dbbdb35d877a57143d080ad95_547	K_pneumoniae_3_02590
nikA		nickel ABC transporter substrate-binding protein	5	5	1	1	11517	38	27		1568	1568	1568	9645baa8bb46fe9f9ffaa8fccfada4b3_558		7073f0826909e86605b7f24ba93c455b_538	4d8fdf303c55f8e586b180af2243e275_543	2900b96dbbdb35d877a57143d080ad95_549	K_pneumoniae_3_02591
WP_023301451.1		LysR family transcriptional regulator	5	5	1	1	11518	38	26		860	860	860	9645baa8bb46fe9f9ffaa8fccfada4b3_560		7073f0826909e86605b7f24ba93c455b_540	4d8fdf303c55f8e586b180af2243e275_545	2900b96dbbdb35d877a57143d080ad95_551	K_pneumoniae_3_02592
WP_004181483.1		phenolic acid decarboxylase	5	5	1	1	11519	38	25		506	506	506	9645baa8bb46fe9f9ffaa8fccfada4b3_562		7073f0826909e86605b7f24ba93c455b_542	4d8fdf303c55f8e586b180af2243e275_547	2900b96dbbdb35d877a57143d080ad95_553	K_pneumoniae_3_02593
arnB		UDP-4-amino-4-deoxy-L-arabinose aminotransferase	5	5	1	1	11520	38	24		1139	1139	1139	9645baa8bb46fe9f9ffaa8fccfada4b3_564		7073f0826909e86605b7f24ba93c455b_544	4d8fdf303c55f8e586b180af2243e275_549	2900b96dbbdb35d877a57143d080ad95_555	K_pneumoniae_3_02594
arnC		undecaprenyl-phosphate 4-deoxy-4-formamido-L-arabinose transferase ArnC	5	5	1	1	11521	38	23		983	983	983	9645baa8bb46fe9f9ffaa8fccfada4b3_566		7073f0826909e86605b7f24ba93c455b_546	4d8fdf303c55f8e586b180af2243e275_551	2900b96dbbdb35d877a57143d080ad95_557	K_pneumoniae_3_02595
arnA		bifunctional UDP-4-amino-4-deoxy-L-arabinose formyltransferase/UDP-glucuronic acid oxidase ArnA	5	5	1	1	11522	38	22		1985	1985	1985	9645baa8bb46fe9f9ffaa8fccfada4b3_568		7073f0826909e86605b7f24ba93c455b_548	4d8fdf303c55f8e586b180af2243e275_553	2900b96dbbdb35d877a57143d080ad95_559	K_pneumoniae_3_02596
WP_009308746.1		4-deoxy-4-formamido-L-arabinose-phosphoundecaprenol deformylase	5	5	1	1	11523	38	21		902	902	902	9645baa8bb46fe9f9ffaa8fccfada4b3_570		7073f0826909e86605b7f24ba93c455b_550	4d8fdf303c55f8e586b180af2243e275_555	2900b96dbbdb35d877a57143d080ad95_561	K_pneumoniae_3_02597
arnT		lipid IV(A) 4-amino-4-deoxy-L-arabinosyltransferase	5	5	1	1	11524	38	20		1655	1655	1655	9645baa8bb46fe9f9ffaa8fccfada4b3_572		7073f0826909e86605b7f24ba93c455b_552	4d8fdf303c55f8e586b180af2243e275_557	2900b96dbbdb35d877a57143d080ad95_563	K_pneumoniae_3_02598
arnE		4-amino-4-deoxy-L-arabinose-phosphoundecaprenol flippase subunit ArnE	5	5	1	1	11525	38	19		338	338	338	9645baa8bb46fe9f9ffaa8fccfada4b3_574		7073f0826909e86605b7f24ba93c455b_554	4d8fdf303c55f8e586b180af2243e275_559	2900b96dbbdb35d877a57143d080ad95_565	K_pneumoniae_3_02599
WP_002920863.1		4-amino-4-deoxy-L-arabinose-phosphoundecaprenol flippase subunit ArnF	5	5	1	1	11526	38	18		380	380	380	9645baa8bb46fe9f9ffaa8fccfada4b3_576		7073f0826909e86605b7f24ba93c455b_556	4d8fdf303c55f8e586b180af2243e275_561	2900b96dbbdb35d877a57143d080ad95_567	K_pneumoniae_3_02600
WP_004145147.1		AI-2E family transporter	5	5	1	1	11527	38	17		1049	1049	1049	9645baa8bb46fe9f9ffaa8fccfada4b3_578		7073f0826909e86605b7f24ba93c455b_558	4d8fdf303c55f8e586b180af2243e275_563	2900b96dbbdb35d877a57143d080ad95_569	K_pneumoniae_3_02601
WP_032420656.1		MFS transporter	5	5	1	1	11528	38	16		1220	1220	1220	9645baa8bb46fe9f9ffaa8fccfada4b3_580		7073f0826909e86605b7f24ba93c455b_560	4d8fdf303c55f8e586b180af2243e275_565	2900b96dbbdb35d877a57143d080ad95_571	K_pneumoniae_3_02602
WP_002920861.1		DcrB family lipoprotein	5	5	1	1	11529	38	15		557	557	557	9645baa8bb46fe9f9ffaa8fccfada4b3_582		7073f0826909e86605b7f24ba93c455b_562	4d8fdf303c55f8e586b180af2243e275_567	2900b96dbbdb35d877a57143d080ad95_573	K_pneumoniae_3_02603
WP_002920860.1		7-cyano-7-deazaguanine/7-aminomethyl-7-deazaguanine transporter	5	5	1	1	11530	38	14		665	665	665	9645baa8bb46fe9f9ffaa8fccfada4b3_584		7073f0826909e86605b7f24ba93c455b_564	4d8fdf303c55f8e586b180af2243e275_569	2900b96dbbdb35d877a57143d080ad95_575	K_pneumoniae_3_02604
tusA		sulfurtransferase TusA	5	5	1	1	11531	38	13		245	245	245	9645baa8bb46fe9f9ffaa8fccfada4b3_586		7073f0826909e86605b7f24ba93c455b_566	4d8fdf303c55f8e586b180af2243e275_571	2900b96dbbdb35d877a57143d080ad95_577	K_pneumoniae_3_02605
zntA		Zn(II)/Cd(II)/Pb(II) translocating P-type ATPase ZntA	5	5	1	1	11532	38	12		2210	2210	2210	9645baa8bb46fe9f9ffaa8fccfada4b3_588		7073f0826909e86605b7f24ba93c455b_568	4d8fdf303c55f8e586b180af2243e275_573	2900b96dbbdb35d877a57143d080ad95_579	K_pneumoniae_3_02606
WP_004173987.1		lysoplasmalogenase	5	5	1	1	11533	38	11		626	626	626	9645baa8bb46fe9f9ffaa8fccfada4b3_590		7073f0826909e86605b7f24ba93c455b_570	4d8fdf303c55f8e586b180af2243e275_575	2900b96dbbdb35d877a57143d080ad95_581	K_pneumoniae_3_02607
WP_004173989.1		DUF2500 domain-containing protein	5	5	1	1	11534	38	10		350	350	350	9645baa8bb46fe9f9ffaa8fccfada4b3_592		7073f0826909e86605b7f24ba93c455b_572	4d8fdf303c55f8e586b180af2243e275_577	2900b96dbbdb35d877a57143d080ad95_583	K_pneumoniae_3_02608
WP_002920822.1		DUF1145 family protein	5	5	1	1	11535	38	9		275	275	275	9645baa8bb46fe9f9ffaa8fccfada4b3_594		7073f0826909e86605b7f24ba93c455b_574	4d8fdf303c55f8e586b180af2243e275_579	2900b96dbbdb35d877a57143d080ad95_585	K_pneumoniae_3_02609
rsmD		16S rRNA (guanine(966)-N(2))-methyltransferase	5	5	1	1	11536	38	8		596	596	596	9645baa8bb46fe9f9ffaa8fccfada4b3_596		7073f0826909e86605b7f24ba93c455b_576	4d8fdf303c55f8e586b180af2243e275_581	2900b96dbbdb35d877a57143d080ad95_587	K_pneumoniae_3_02610
ftsY		signal recognition particle-docking protein FtsY	5	5	1	1	11537	38	7		1523	1523	1523	9645baa8bb46fe9f9ffaa8fccfada4b3_598		7073f0826909e86605b7f24ba93c455b_578	4d8fdf303c55f8e586b180af2243e275_583	2900b96dbbdb35d877a57143d080ad95_589	K_pneumoniae_3_02611
ftsE		cell division ATP-binding protein FtsE	5	5	1	1	11538	38	6		668	668	668	9645baa8bb46fe9f9ffaa8fccfada4b3_600		7073f0826909e86605b7f24ba93c455b_580	4d8fdf303c55f8e586b180af2243e275_585	2900b96dbbdb35d877a57143d080ad95_591	K_pneumoniae_3_02612
ftsX		permease-like cell division protein FtsX	5	5	1	1	11539	38	5		1055	1055	1055	9645baa8bb46fe9f9ffaa8fccfada4b3_602		7073f0826909e86605b7f24ba93c455b_582	4d8fdf303c55f8e586b180af2243e275_587	2900b96dbbdb35d877a57143d080ad95_593	K_pneumoniae_3_02613
gabR_2		PLP-dependent aminotransferase family protein	5	5	1	1	11540	188	1		1523	1523	1523	9645baa8bb46fe9f9ffaa8fccfada4b3_606		7073f0826909e86605b7f24ba93c455b_586	4d8fdf303c55f8e586b180af2243e275_591	2900b96dbbdb35d877a57143d080ad95_597	K_pneumoniae_3_02615
WP_201720407.1		4-aminobutyrate--2-oxoglutarate transaminase	5	5	1	1	11541	188	2		1265	1265	1265	9645baa8bb46fe9f9ffaa8fccfada4b3_608		7073f0826909e86605b7f24ba93c455b_588	4d8fdf303c55f8e586b180af2243e275_593	2900b96dbbdb35d877a57143d080ad95_599	K_pneumoniae_3_02616
WP_004150081.1		amino acid permease	5	5	1	1	11542	188	3		1244	1244	1244	9645baa8bb46fe9f9ffaa8fccfada4b3_610		7073f0826909e86605b7f24ba93c455b_590	4d8fdf303c55f8e586b180af2243e275_595	2900b96dbbdb35d877a57143d080ad95_601	K_pneumoniae_3_02617
panM		aspartate 1-decarboxylase autocleavage activator PanM	5	5	1	1	11563	221	2		383	383	383	9645baa8bb46fe9f9ffaa8fccfada4b3_614		7073f0826909e86605b7f24ba93c455b_594	4d8fdf303c55f8e586b180af2243e275_599	2900b96dbbdb35d877a57143d080ad95_605	K_pneumoniae_3_02619
livK		high-affinity branched-chain amino acid ABC transporter substrate-binding protein LivK	5	5	1	1	11562	221	1		1109	1109	1109	9645baa8bb46fe9f9ffaa8fccfada4b3_616		7073f0826909e86605b7f24ba93c455b_596	4d8fdf303c55f8e586b180af2243e275_601	2900b96dbbdb35d877a57143d080ad95_607	K_pneumoniae_3_02620
livM		branched chain amino acid ABC transporter permease LivM	5	5	1	1	11560	262	1		1277	1277	1277	9645baa8bb46fe9f9ffaa8fccfada4b3_620		7073f0826909e86605b7f24ba93c455b_600	4d8fdf303c55f8e586b180af2243e275_605	2900b96dbbdb35d877a57143d080ad95_611	K_pneumoniae_3_02622
livF		high-affinity branched-chain amino acid ABC transporter ATP-binding protein LivF	5	5	1	1	11557	80	1		713	713	713	9645baa8bb46fe9f9ffaa8fccfada4b3_624		7073f0826909e86605b7f24ba93c455b_604	4d8fdf303c55f8e586b180af2243e275_609	2900b96dbbdb35d877a57143d080ad95_615	K_pneumoniae_3_02624
WP_004174006.1		type II toxin-antitoxin system Phd/YefM family antitoxin	5	5	1	1	11556	80	2		221	221	221	9645baa8bb46fe9f9ffaa8fccfada4b3_626		7073f0826909e86605b7f24ba93c455b_606	4d8fdf303c55f8e586b180af2243e275_611	2900b96dbbdb35d877a57143d080ad95_617	K_pneumoniae_3_02625
WP_002920800.1		type II toxin-antitoxin system death-on-curing family toxin	5	5	1	1	11555	80	3		368	368	368	9645baa8bb46fe9f9ffaa8fccfada4b3_628		7073f0826909e86605b7f24ba93c455b_608	4d8fdf303c55f8e586b180af2243e275_613	2900b96dbbdb35d877a57143d080ad95_619	K_pneumoniae_3_02626
ugpB		sn-glycerol-3-phosphate ABC transporter substrate-binding protein UgpB	5	5	1	1	11554	80	4		1316	1316	1316	9645baa8bb46fe9f9ffaa8fccfada4b3_630		7073f0826909e86605b7f24ba93c455b_610	4d8fdf303c55f8e586b180af2243e275_615	2900b96dbbdb35d877a57143d080ad95_621	K_pneumoniae_3_02627
ugpA		sn-glycerol-3-phosphate ABC transporter permease UgpA	5	5	1	1	11553	80	5		887	887	887	9645baa8bb46fe9f9ffaa8fccfada4b3_632		7073f0826909e86605b7f24ba93c455b_612	4d8fdf303c55f8e586b180af2243e275_617	2900b96dbbdb35d877a57143d080ad95_623	K_pneumoniae_3_02628
ugpE		sn-glycerol-3-phosphate ABC transporter permease UgpE	5	5	1	1	11552	80	6		845	845	845	9645baa8bb46fe9f9ffaa8fccfada4b3_634		7073f0826909e86605b7f24ba93c455b_614	4d8fdf303c55f8e586b180af2243e275_619	2900b96dbbdb35d877a57143d080ad95_625	K_pneumoniae_3_02629
WP_004150074.1		sn-glycerol-3-phosphate import ATP-binding protein UgpC	5	5	1	1	11551	80	7		1070	1070	1070	9645baa8bb46fe9f9ffaa8fccfada4b3_636		7073f0826909e86605b7f24ba93c455b_616	4d8fdf303c55f8e586b180af2243e275_621	2900b96dbbdb35d877a57143d080ad95_627	K_pneumoniae_3_02630
ugpQ		glycerophosphodiester phosphodiesterase	5	5	1	1	11550	80	8		740	740	740	9645baa8bb46fe9f9ffaa8fccfada4b3_638		7073f0826909e86605b7f24ba93c455b_618	4d8fdf303c55f8e586b180af2243e275_623	2900b96dbbdb35d877a57143d080ad95_629	K_pneumoniae_3_02631
WP_004150073.1		DUF2756 family protein	5	5	1	1	11549	80	9		320	320	320	9645baa8bb46fe9f9ffaa8fccfada4b3_640		7073f0826909e86605b7f24ba93c455b_620	4d8fdf303c55f8e586b180af2243e275_625	2900b96dbbdb35d877a57143d080ad95_631	K_pneumoniae_3_02632
ggt		gamma-glutamyltransferase	5	5	1	1	11548	80	10		1745	1745	1745	9645baa8bb46fe9f9ffaa8fccfada4b3_642		7073f0826909e86605b7f24ba93c455b_622	4d8fdf303c55f8e586b180af2243e275_627	2900b96dbbdb35d877a57143d080ad95_633	K_pneumoniae_3_02633
WP_004181468.1		oxidoreductase	5	5	1	1	10088	80	15		1037	1037	1037	9645baa8bb46fe9f9ffaa8fccfada4b3_648		7073f0826909e86605b7f24ba93c455b_628	4d8fdf303c55f8e586b180af2243e275_633	2900b96dbbdb35d877a57143d080ad95_639	K_pneumoniae_3_02636
WP_002920779.1		pirin family protein	5	5	1	1	10089	80	14		695	695	695	9645baa8bb46fe9f9ffaa8fccfada4b3_650		7073f0826909e86605b7f24ba93c455b_630	4d8fdf303c55f8e586b180af2243e275_635	2900b96dbbdb35d877a57143d080ad95_641	K_pneumoniae_3_02637
gntR		gluconate operon transcriptional repressor GntR	5	5	1	1	10090	80	13		995	995	995	9645baa8bb46fe9f9ffaa8fccfada4b3_652		7073f0826909e86605b7f24ba93c455b_632	4d8fdf303c55f8e586b180af2243e275_637	2900b96dbbdb35d877a57143d080ad95_643	K_pneumoniae_3_02638
gntK		gluconokinase	5	5	1	1	10091	80	12		530	530	530	9645baa8bb46fe9f9ffaa8fccfada4b3_654		7073f0826909e86605b7f24ba93c455b_634	4d8fdf303c55f8e586b180af2243e275_639	2900b96dbbdb35d877a57143d080ad95_645	K_pneumoniae_3_02639
group_1237	asd	aspartate-semialdehyde dehydrogenase	5	5	1	1	10084	79	3		1106	1106	1106	9645baa8bb46fe9f9ffaa8fccfada4b3_660		7073f0826909e86605b7f24ba93c455b_640	4d8fdf303c55f8e586b180af2243e275_645	2900b96dbbdb35d877a57143d080ad95_651	K_pneumoniae_3_02641
glgB		1,4-alpha-glucan branching enzyme	5	5	1	1	10083	79	4		2186	2186	2186	9645baa8bb46fe9f9ffaa8fccfada4b3_662		7073f0826909e86605b7f24ba93c455b_642	4d8fdf303c55f8e586b180af2243e275_647	2900b96dbbdb35d877a57143d080ad95_653	K_pneumoniae_3_02642
glgX		glycogen debranching protein GlgX	5	5	1	1	10082	79	5		1976	1976	1976	9645baa8bb46fe9f9ffaa8fccfada4b3_664		7073f0826909e86605b7f24ba93c455b_644	4d8fdf303c55f8e586b180af2243e275_649	2900b96dbbdb35d877a57143d080ad95_655	K_pneumoniae_3_02643
WP_000608644.1		IS1380-like element ISEcp1 family transposase	5	7	1.4	1	4281				194	1262	854	9645baa8bb46fe9f9ffaa8fccfada4b3_10494 9645baa8bb46fe9f9ffaa8fccfada4b3_10499		7073f0826909e86605b7f24ba93c455b_10473 7073f0826909e86605b7f24ba93c455b_10478	4d8fdf303c55f8e586b180af2243e275_10621	2900b96dbbdb35d877a57143d080ad95_10759	K_pneumoniae_3_05135
glgC		glucose-1-phosphate adenylyltransferase	5	5	1	1	10081	79	6		1295	1295	1295	9645baa8bb46fe9f9ffaa8fccfada4b3_666		7073f0826909e86605b7f24ba93c455b_646	4d8fdf303c55f8e586b180af2243e275_651	2900b96dbbdb35d877a57143d080ad95_657	K_pneumoniae_3_02644
glgA		glycogen synthase GlgA	5	5	1	1	10080	79	7		1433	1433	1433	9645baa8bb46fe9f9ffaa8fccfada4b3_668		7073f0826909e86605b7f24ba93c455b_648	4d8fdf303c55f8e586b180af2243e275_653	2900b96dbbdb35d877a57143d080ad95_659	K_pneumoniae_3_02645
glgP		glycogen phosphorylase	5	5	1	1	10079	79	8		2447	2447	2447	9645baa8bb46fe9f9ffaa8fccfada4b3_670		7073f0826909e86605b7f24ba93c455b_650	4d8fdf303c55f8e586b180af2243e275_655	2900b96dbbdb35d877a57143d080ad95_661	K_pneumoniae_3_02646
glpD		glycerol-3-phosphate dehydrogenase	5	5	1	1	10056	79	11		1508	1508	1508	9645baa8bb46fe9f9ffaa8fccfada4b3_676		7073f0826909e86605b7f24ba93c455b_652	4d8fdf303c55f8e586b180af2243e275_657	2900b96dbbdb35d877a57143d080ad95_667	K_pneumoniae_3_02649
glpE		thiosulfate sulfurtransferase GlpE	5	5	1	1	10057	79	12		329	329	329	9645baa8bb46fe9f9ffaa8fccfada4b3_678		7073f0826909e86605b7f24ba93c455b_654	4d8fdf303c55f8e586b180af2243e275_659	2900b96dbbdb35d877a57143d080ad95_669	K_pneumoniae_3_02650
glpG		rhomboid family intramembrane serine protease GlpG	5	5	1	1	10058	79	13		824	830	828	9645baa8bb46fe9f9ffaa8fccfada4b3_680		7073f0826909e86605b7f24ba93c455b_656	4d8fdf303c55f8e586b180af2243e275_661	2900b96dbbdb35d877a57143d080ad95_671	K_pneumoniae_3_02651
WP_002920548.1		DeoR/GlpR family transcriptional regulator	5	5	1	1	10059	79	14		758	758	758	9645baa8bb46fe9f9ffaa8fccfada4b3_682		7073f0826909e86605b7f24ba93c455b_658	4d8fdf303c55f8e586b180af2243e275_663	2900b96dbbdb35d877a57143d080ad95_673	K_pneumoniae_3_02652
malT		HTH-type transcriptional regulator MalT	5	5	1	1	10060	79	15		2705	2705	2705	9645baa8bb46fe9f9ffaa8fccfada4b3_684		7073f0826909e86605b7f24ba93c455b_660	4d8fdf303c55f8e586b180af2243e275_665	2900b96dbbdb35d877a57143d080ad95_675	K_pneumoniae_3_02653
malP		maltodextrin phosphorylase	5	5	1	1	10061	79	16		2390	2390	2390	9645baa8bb46fe9f9ffaa8fccfada4b3_686		7073f0826909e86605b7f24ba93c455b_662	4d8fdf303c55f8e586b180af2243e275_667	2900b96dbbdb35d877a57143d080ad95_677	K_pneumoniae_3_02654
malQ		4-alpha-glucanotransferase	5	5	1	1	10062	79	17		2093	2093	2093	9645baa8bb46fe9f9ffaa8fccfada4b3_688		7073f0826909e86605b7f24ba93c455b_664	4d8fdf303c55f8e586b180af2243e275_669	2900b96dbbdb35d877a57143d080ad95_679	K_pneumoniae_3_02655
gntT		gluconate transporter	5	5	1	1	10063	79	1		1316	1316	1316	9645baa8bb46fe9f9ffaa8fccfada4b3_690		7073f0826909e86605b7f24ba93c455b_666	4d8fdf303c55f8e586b180af2243e275_671	2900b96dbbdb35d877a57143d080ad95_681	K_pneumoniae_3_02656
gntX		DNA utilization protein GntX	5	5	1	1	10055	119	3		674	674	674	9645baa8bb46fe9f9ffaa8fccfada4b3_694		7073f0826909e86605b7f24ba93c455b_670	4d8fdf303c55f8e586b180af2243e275_675	2900b96dbbdb35d877a57143d080ad95_685	K_pneumoniae_3_02658
bioH		pimeloyl-ACP methyl ester esterase BioH	5	5	1	1	10054	119	4		773	773	773	9645baa8bb46fe9f9ffaa8fccfada4b3_696		7073f0826909e86605b7f24ba93c455b_672	4d8fdf303c55f8e586b180af2243e275_677	2900b96dbbdb35d877a57143d080ad95_687	K_pneumoniae_3_02659
WP_002920510.1		DUF1471 domain-containing protein	5	5	1	1	10053	119	5		269	269	269	9645baa8bb46fe9f9ffaa8fccfada4b3_698		7073f0826909e86605b7f24ba93c455b_674	4d8fdf303c55f8e586b180af2243e275_679	2900b96dbbdb35d877a57143d080ad95_689	K_pneumoniae_3_02660
feoC		[Fe-S]-dependent transcriptional repressor FeoC	5	5	1	1	10052	119	6		239	239	239	9645baa8bb46fe9f9ffaa8fccfada4b3_700		7073f0826909e86605b7f24ba93c455b_676	4d8fdf303c55f8e586b180af2243e275_681	2900b96dbbdb35d877a57143d080ad95_691	K_pneumoniae_3_02661
feoB		Fe(2+) transporter permease subunit FeoB	5	5	1	1	10051	119	7		2318	2318	2318	9645baa8bb46fe9f9ffaa8fccfada4b3_702		7073f0826909e86605b7f24ba93c455b_678	4d8fdf303c55f8e586b180af2243e275_683	2900b96dbbdb35d877a57143d080ad95_693	K_pneumoniae_3_02662
feoA		ferrous iron transporter A	5	5	1	1	10050	119	8		227	227	227	9645baa8bb46fe9f9ffaa8fccfada4b3_704		7073f0826909e86605b7f24ba93c455b_680	4d8fdf303c55f8e586b180af2243e275_685	2900b96dbbdb35d877a57143d080ad95_695	K_pneumoniae_3_02663
WP_004150056.1		RNA-binding transcriptional accessory protein	5	5	1	1	10049	119	2		2330	2330	2330	9645baa8bb46fe9f9ffaa8fccfada4b3_706		7073f0826909e86605b7f24ba93c455b_682	4d8fdf303c55f8e586b180af2243e275_687	2900b96dbbdb35d877a57143d080ad95_697	K_pneumoniae_3_02664
greB		transcription elongation factor GreB	5	5	1	1	10048	119	1		473	473	473	9645baa8bb46fe9f9ffaa8fccfada4b3_708		7073f0826909e86605b7f24ba93c455b_684	4d8fdf303c55f8e586b180af2243e275_689	2900b96dbbdb35d877a57143d080ad95_699	K_pneumoniae_3_02665
envZ		two-component system sensor histidine kinase EnvZ	5	5	1	1	10047	92	1		1355	1355	1355	9645baa8bb46fe9f9ffaa8fccfada4b3_712		7073f0826909e86605b7f24ba93c455b_688	4d8fdf303c55f8e586b180af2243e275_693	2900b96dbbdb35d877a57143d080ad95_703	K_pneumoniae_3_02667
group_1261	pckA	phosphoenolpyruvate carboxykinase (ATP)	5	5	1	1	10046	92	2		1622	1622	1622	9645baa8bb46fe9f9ffaa8fccfada4b3_714		7073f0826909e86605b7f24ba93c455b_690	4d8fdf303c55f8e586b180af2243e275_695	2900b96dbbdb35d877a57143d080ad95_705	K_pneumoniae_3_02668
hslO		Hsp33 family molecular chaperone HslO	5	5	1	1	10045	92	3		878	884	882	9645baa8bb46fe9f9ffaa8fccfada4b3_716		7073f0826909e86605b7f24ba93c455b_692	4d8fdf303c55f8e586b180af2243e275_697	2900b96dbbdb35d877a57143d080ad95_707	K_pneumoniae_3_02669
hslR		ribosome-associated heat shock protein Hsp15	5	5	1	1	10044	92	14		401	401	401	9645baa8bb46fe9f9ffaa8fccfada4b3_718		7073f0826909e86605b7f24ba93c455b_694	4d8fdf303c55f8e586b180af2243e275_699	2900b96dbbdb35d877a57143d080ad95_709	K_pneumoniae_3_02670
yrfG		GMP/IMP nucleotidase	5	5	1	1	10043	92	13		683	683	683	9645baa8bb46fe9f9ffaa8fccfada4b3_720		7073f0826909e86605b7f24ba93c455b_696	4d8fdf303c55f8e586b180af2243e275_701	2900b96dbbdb35d877a57143d080ad95_711	K_pneumoniae_3_02671
WP_004174025.1		intracellular growth attenuator family protein	5	5	1	1	10042	92	12		2129	2129	2129	9645baa8bb46fe9f9ffaa8fccfada4b3_722		7073f0826909e86605b7f24ba93c455b_698	4d8fdf303c55f8e586b180af2243e275_703	2900b96dbbdb35d877a57143d080ad95_713	K_pneumoniae_3_02672
nudE		ADP compounds hydrolase NudE	5	5	1	1	10041	92	11		560	560	560	9645baa8bb46fe9f9ffaa8fccfada4b3_724		7073f0826909e86605b7f24ba93c455b_700	4d8fdf303c55f8e586b180af2243e275_705	2900b96dbbdb35d877a57143d080ad95_715	K_pneumoniae_3_02673
mrcA		peptidoglycan glycosyltransferase/peptidoglycan DD-transpeptidase MrcA	5	5	1	1	10040	92	10		2558	2558	2558	9645baa8bb46fe9f9ffaa8fccfada4b3_726		7073f0826909e86605b7f24ba93c455b_702	4d8fdf303c55f8e586b180af2243e275_707	2900b96dbbdb35d877a57143d080ad95_717	K_pneumoniae_3_02674
WP_004174027.1		hypothetical protein	5	5	1	1	10039	92	9		800	800	800	9645baa8bb46fe9f9ffaa8fccfada4b3_728		7073f0826909e86605b7f24ba93c455b_704	4d8fdf303c55f8e586b180af2243e275_709	2900b96dbbdb35d877a57143d080ad95_719	K_pneumoniae_3_02675
WP_004174029.1		hypothetical protein	5	5	1	1	10037	92	7		428	428	428	9645baa8bb46fe9f9ffaa8fccfada4b3_732		7073f0826909e86605b7f24ba93c455b_708	4d8fdf303c55f8e586b180af2243e275_713	2900b96dbbdb35d877a57143d080ad95_723	K_pneumoniae_3_02677
aroB		3-dehydroquinate synthase	5	5	1	1	10137	76	1		1094	1094	1094	9645baa8bb46fe9f9ffaa8fccfada4b3_740		7073f0826909e86605b7f24ba93c455b_716	4d8fdf303c55f8e586b180af2243e275_721	2900b96dbbdb35d877a57143d080ad95_731	K_pneumoniae_3_02680
dam		adenine-specific DNA-methyltransferase	5	5	1	1	10135	76	3		827	827	827	9645baa8bb46fe9f9ffaa8fccfada4b3_744		7073f0826909e86605b7f24ba93c455b_720	4d8fdf303c55f8e586b180af2243e275_725	2900b96dbbdb35d877a57143d080ad95_735	K_pneumoniae_3_02682
rpe		ribulose-phosphate 3-epimerase	5	5	1	1	10134	76	4		677	677	677	9645baa8bb46fe9f9ffaa8fccfada4b3_746		7073f0826909e86605b7f24ba93c455b_722	4d8fdf303c55f8e586b180af2243e275_727	2900b96dbbdb35d877a57143d080ad95_737	K_pneumoniae_3_02683
gph		phosphoglycolate phosphatase	5	5	1	1	10133	76	5		761	761	761	9645baa8bb46fe9f9ffaa8fccfada4b3_748		7073f0826909e86605b7f24ba93c455b_724	4d8fdf303c55f8e586b180af2243e275_729	2900b96dbbdb35d877a57143d080ad95_739	K_pneumoniae_3_02684
trpS		tryptophan--tRNA ligase	5	5	1	1	10132	76	6		1004	1004	1004	9645baa8bb46fe9f9ffaa8fccfada4b3_750		7073f0826909e86605b7f24ba93c455b_726	4d8fdf303c55f8e586b180af2243e275_731	2900b96dbbdb35d877a57143d080ad95_741	K_pneumoniae_3_02685
cysG		siroheme synthase CysG	5	5	1	1	10131	76	7		1373	1373	1373	9645baa8bb46fe9f9ffaa8fccfada4b3_752		7073f0826909e86605b7f24ba93c455b_728	4d8fdf303c55f8e586b180af2243e275_733	2900b96dbbdb35d877a57143d080ad95_743	K_pneumoniae_3_02686
nirD		nitrite reductase small subunit NirD	5	5	1	1	10130	76	8		326	326	326	9645baa8bb46fe9f9ffaa8fccfada4b3_754		7073f0826909e86605b7f24ba93c455b_730	4d8fdf303c55f8e586b180af2243e275_735	2900b96dbbdb35d877a57143d080ad95_745	K_pneumoniae_3_02687
nirB		nitrite reductase large subunit NirB	5	5	1	1	10129	76	17		2543	2543	2543	9645baa8bb46fe9f9ffaa8fccfada4b3_756		7073f0826909e86605b7f24ba93c455b_732	4d8fdf303c55f8e586b180af2243e275_737	2900b96dbbdb35d877a57143d080ad95_747	K_pneumoniae_3_02688
tsgA		MFS transporter TsgA	5	5	1	1	10141	76	15		1187	1187	1187	9645baa8bb46fe9f9ffaa8fccfada4b3_760		7073f0826909e86605b7f24ba93c455b_736	4d8fdf303c55f8e586b180af2243e275_741	2900b96dbbdb35d877a57143d080ad95_751	K_pneumoniae_3_02691
ppiA		peptidylprolyl isomerase A	5	5	1	1	10142	76	14		569	569	569	9645baa8bb46fe9f9ffaa8fccfada4b3_762		7073f0826909e86605b7f24ba93c455b_738	4d8fdf303c55f8e586b180af2243e275_743	2900b96dbbdb35d877a57143d080ad95_753	K_pneumoniae_3_02692
WP_002920231.1		YhfG family protein	5	5	1	1	10143	76	13		167	167	167	9645baa8bb46fe9f9ffaa8fccfada4b3_764		7073f0826909e86605b7f24ba93c455b_740	4d8fdf303c55f8e586b180af2243e275_745	2900b96dbbdb35d877a57143d080ad95_755	K_pneumoniae_3_02693
WP_004181446.1		putative adenosine monophosphate-protein transferase Fic	5	5	1	1	10144	76	12		602	602	602	9645baa8bb46fe9f9ffaa8fccfada4b3_766		7073f0826909e86605b7f24ba93c455b_742	4d8fdf303c55f8e586b180af2243e275_747	2900b96dbbdb35d877a57143d080ad95_757	K_pneumoniae_3_02694
pabA		aminodeoxychorismate synthase component 2	5	5	1	1	10145	76	11		563	563	563	9645baa8bb46fe9f9ffaa8fccfada4b3_768		7073f0826909e86605b7f24ba93c455b_744	4d8fdf303c55f8e586b180af2243e275_749	2900b96dbbdb35d877a57143d080ad95_759	K_pneumoniae_3_02695
WP_002920226.1		aspartate aminotransferase family protein	5	5	1	1	10146	76	10		1220	1220	1220	9645baa8bb46fe9f9ffaa8fccfada4b3_770		7073f0826909e86605b7f24ba93c455b_746	4d8fdf303c55f8e586b180af2243e275_751	2900b96dbbdb35d877a57143d080ad95_761	K_pneumoniae_3_02696
WP_020323923.1		YccS/YhfK family putative transporter	5	5	1	1	10147	76	9		2078	2078	2078	9645baa8bb46fe9f9ffaa8fccfada4b3_772		7073f0826909e86605b7f24ba93c455b_748	4d8fdf303c55f8e586b180af2243e275_753	2900b96dbbdb35d877a57143d080ad95_763	K_pneumoniae_3_02697
WP_002920158.1		OsmC family protein	5	5	1	1	10574	126	6		404	404	404	9645baa8bb46fe9f9ffaa8fccfada4b3_776		7073f0826909e86605b7f24ba93c455b_752	4d8fdf303c55f8e586b180af2243e275_757	2900b96dbbdb35d877a57143d080ad95_767	K_pneumoniae_3_02699
WP_002920153.1		phosphoribulokinase	5	5	1	1	10573	126	7		869	869	869	9645baa8bb46fe9f9ffaa8fccfada4b3_778		7073f0826909e86605b7f24ba93c455b_754	4d8fdf303c55f8e586b180af2243e275_759	2900b96dbbdb35d877a57143d080ad95_769	K_pneumoniae_3_02700
WP_004174055.1		YheU family protein	5	5	1	1	10572	126	8		218	218	218	9645baa8bb46fe9f9ffaa8fccfada4b3_780		7073f0826909e86605b7f24ba93c455b_756	4d8fdf303c55f8e586b180af2243e275_761	2900b96dbbdb35d877a57143d080ad95_771	K_pneumoniae_3_02701
WP_004185926.1		ABC transporter ATP-binding protein	5	5	1	1	10570	126	4		1904	1904	1904	9645baa8bb46fe9f9ffaa8fccfada4b3_784		7073f0826909e86605b7f24ba93c455b_760	4d8fdf303c55f8e586b180af2243e275_765	2900b96dbbdb35d877a57143d080ad95_775	K_pneumoniae_3_02703
kefG		glutathione-regulated potassium-efflux system ancillary protein KefG	5	5	1	1	10569	126	3		560	563	562	9645baa8bb46fe9f9ffaa8fccfada4b3_786		7073f0826909e86605b7f24ba93c455b_762	4d8fdf303c55f8e586b180af2243e275_767	2900b96dbbdb35d877a57143d080ad95_777	K_pneumoniae_3_02704
WP_002920143.1		YheV family putative metal-binding protein	5	5	1	1	10150	126	1		200	200	200	9645baa8bb46fe9f9ffaa8fccfada4b3_790		7073f0826909e86605b7f24ba93c455b_766	4d8fdf303c55f8e586b180af2243e275_771	2900b96dbbdb35d877a57143d080ad95_781	K_pneumoniae_3_02706
WP_002920136.1		protein SlyX	5	5	1	1	10149	218	2		218	218	218	9645baa8bb46fe9f9ffaa8fccfada4b3_794		7073f0826909e86605b7f24ba93c455b_770	4d8fdf303c55f8e586b180af2243e275_775	2900b96dbbdb35d877a57143d080ad95_785	K_pneumoniae_3_02708
fkpA		FKBP-type peptidyl-prolyl cis-trans isomerase	5	5	1	1	10148	218	1		830	830	830	9645baa8bb46fe9f9ffaa8fccfada4b3_796		7073f0826909e86605b7f24ba93c455b_772	4d8fdf303c55f8e586b180af2243e275_777	2900b96dbbdb35d877a57143d080ad95_787	K_pneumoniae_3_02709
tusD		sulfurtransferase complex subunit TusD	5	5	1	1	10552	187	1		386	386	386	9645baa8bb46fe9f9ffaa8fccfada4b3_800		7073f0826909e86605b7f24ba93c455b_776	4d8fdf303c55f8e586b180af2243e275_781	2900b96dbbdb35d877a57143d080ad95_791	K_pneumoniae_3_02711
tusC		sulfurtransferase complex subunit TusC	5	5	1	1	10551	187	2		359	359	359	9645baa8bb46fe9f9ffaa8fccfada4b3_802		7073f0826909e86605b7f24ba93c455b_778	4d8fdf303c55f8e586b180af2243e275_783	2900b96dbbdb35d877a57143d080ad95_793	K_pneumoniae_3_02712
tusB		sulfurtransferase complex subunit TusB	5	5	1	1	10550	187	3		287	287	287	9645baa8bb46fe9f9ffaa8fccfada4b3_804		7073f0826909e86605b7f24ba93c455b_780	4d8fdf303c55f8e586b180af2243e275_785	2900b96dbbdb35d877a57143d080ad95_795	K_pneumoniae_3_02713
bfd		bacterioferritin-associated ferredoxin	5	5	1	1	10544	186	3		194	194	194	9645baa8bb46fe9f9ffaa8fccfada4b3_814		7073f0826909e86605b7f24ba93c455b_790	4d8fdf303c55f8e586b180af2243e275_795	2900b96dbbdb35d877a57143d080ad95_805	K_pneumoniae_3_02718
bfr		bacterioferritin	5	5	1	1	10543	186	2		476	476	476	9645baa8bb46fe9f9ffaa8fccfada4b3_816		7073f0826909e86605b7f24ba93c455b_792	4d8fdf303c55f8e586b180af2243e275_797	2900b96dbbdb35d877a57143d080ad95_807	K_pneumoniae_3_02719
rpmC		50S ribosomal protein L29	5	5	1	1	10522	248	1		191	191	191	9645baa8bb46fe9f9ffaa8fccfada4b3_838		7073f0826909e86605b7f24ba93c455b_814	4d8fdf303c55f8e586b180af2243e275_819	2900b96dbbdb35d877a57143d080ad95_829	K_pneumoniae_3_02730
rplO		50S ribosomal protein L15	5	5	1	1	10510	255	1		434	434	434	9645baa8bb46fe9f9ffaa8fccfada4b3_860		7073f0826909e86605b7f24ba93c455b_836	4d8fdf303c55f8e586b180af2243e275_841	2900b96dbbdb35d877a57143d080ad95_851	K_pneumoniae_3_02741
rpmJ		50S ribosomal protein L36	5	5	1	1	8033	162	2		116	116	116	9645baa8bb46fe9f9ffaa8fccfada4b3_864	fb55d8fe7cfc5cfebfa700165fb94f7d_4348	7073f0826909e86605b7f24ba93c455b_840	4d8fdf303c55f8e586b180af2243e275_845	2900b96dbbdb35d877a57143d080ad95_855
rpsM		30S ribosomal protein S13	5	5	1	1	8035	162	1		356	356	356	9645baa8bb46fe9f9ffaa8fccfada4b3_866		7073f0826909e86605b7f24ba93c455b_842	4d8fdf303c55f8e586b180af2243e275_847	2900b96dbbdb35d877a57143d080ad95_857	K_pneumoniae_3_02743
rpsK		30S ribosomal protein S11	5	5	1	1	8036	162	4		389	389	389	9645baa8bb46fe9f9ffaa8fccfada4b3_868	fb55d8fe7cfc5cfebfa700165fb94f7d_4344	7073f0826909e86605b7f24ba93c455b_844	4d8fdf303c55f8e586b180af2243e275_849	2900b96dbbdb35d877a57143d080ad95_859
WP_002919204.1		DUF1992 domain-containing protein	5	5	1	1	8032	169	3		368	368	368	9645baa8bb46fe9f9ffaa8fccfada4b3_876		7073f0826909e86605b7f24ba93c455b_852	4d8fdf303c55f8e586b180af2243e275_857	2900b96dbbdb35d877a57143d080ad95_867	K_pneumoniae_3_02747
zntR		Zn(2+)-responsive transcriptional regulator	5	5	1	1	8031	169	4		425	425	425	9645baa8bb46fe9f9ffaa8fccfada4b3_878		7073f0826909e86605b7f24ba93c455b_854	4d8fdf303c55f8e586b180af2243e275_859	2900b96dbbdb35d877a57143d080ad95_869	K_pneumoniae_3_02748
mscL		large-conductance mechanosensitive channel protein MscL	5	5	1	1	8045	169	1		413	413	413	9645baa8bb46fe9f9ffaa8fccfada4b3_882		7073f0826909e86605b7f24ba93c455b_858	4d8fdf303c55f8e586b180af2243e275_863	2900b96dbbdb35d877a57143d080ad95_873	K_pneumoniae_3_02750
rsmB		16S rRNA (cytosine(967)-C(5))-methyltransferase RsmB	5	5	1	1	8030	90	11		1295	1295	1295	9645baa8bb46fe9f9ffaa8fccfada4b3_886		7073f0826909e86605b7f24ba93c455b_862	4d8fdf303c55f8e586b180af2243e275_867	2900b96dbbdb35d877a57143d080ad95_877	K_pneumoniae_3_02752
fmt		methionyl-tRNA formyltransferase	5	5	1	1	8029	90	12		947	947	947	9645baa8bb46fe9f9ffaa8fccfada4b3_888		7073f0826909e86605b7f24ba93c455b_864	4d8fdf303c55f8e586b180af2243e275_869	2900b96dbbdb35d877a57143d080ad95_879	K_pneumoniae_3_02753
def		peptide deformylase	5	5	1	1	8028	90	13		509	509	509	9645baa8bb46fe9f9ffaa8fccfada4b3_890		7073f0826909e86605b7f24ba93c455b_866	4d8fdf303c55f8e586b180af2243e275_871	2900b96dbbdb35d877a57143d080ad95_881	K_pneumoniae_3_02754
dprA		DNA-protecting protein DprA	5	5	1	1	8027	90	14		1124	1124	1124	9645baa8bb46fe9f9ffaa8fccfada4b3_892		7073f0826909e86605b7f24ba93c455b_868	4d8fdf303c55f8e586b180af2243e275_873	2900b96dbbdb35d877a57143d080ad95_883	K_pneumoniae_3_02755
smg		DUF494 family protein Smg	5	5	1	1	8026	90	10		473	473	473	9645baa8bb46fe9f9ffaa8fccfada4b3_894		7073f0826909e86605b7f24ba93c455b_870	4d8fdf303c55f8e586b180af2243e275_875	2900b96dbbdb35d877a57143d080ad95_885	K_pneumoniae_3_02756
WP_004145330.1		topoisomerase DNA-binding C4 zinc finger domain-containing protein	5	5	1	1	8025	90	9		542	542	542	9645baa8bb46fe9f9ffaa8fccfada4b3_896		7073f0826909e86605b7f24ba93c455b_872	4d8fdf303c55f8e586b180af2243e275_877	2900b96dbbdb35d877a57143d080ad95_887	K_pneumoniae_3_02757
tsaC		L-threonylcarbamoyladenylate synthase type 1 TsaC	5	5	1	1	8024	90	8		572	572	572	9645baa8bb46fe9f9ffaa8fccfada4b3_898		7073f0826909e86605b7f24ba93c455b_874	4d8fdf303c55f8e586b180af2243e275_879	2900b96dbbdb35d877a57143d080ad95_889	K_pneumoniae_3_02758
aroE		shikimate dehydrogenase	5	5	1	1	8023	90	7		818	818	818	9645baa8bb46fe9f9ffaa8fccfada4b3_900		7073f0826909e86605b7f24ba93c455b_876	4d8fdf303c55f8e586b180af2243e275_881	2900b96dbbdb35d877a57143d080ad95_891	K_pneumoniae_3_02759
WP_002919125.1		DUF1488 domain-containing protein	5	5	1	1	8022	90	6		257	257	257	9645baa8bb46fe9f9ffaa8fccfada4b3_902		7073f0826909e86605b7f24ba93c455b_878	4d8fdf303c55f8e586b180af2243e275_883	2900b96dbbdb35d877a57143d080ad95_893	K_pneumoniae_3_02760
WP_002919123.1		gamma carbonic anhydrase family protein	5	5	1	1	8021	90	5		554	554	554	9645baa8bb46fe9f9ffaa8fccfada4b3_904		7073f0826909e86605b7f24ba93c455b_880	4d8fdf303c55f8e586b180af2243e275_885	2900b96dbbdb35d877a57143d080ad95_895	K_pneumoniae_3_02761
WP_002919103.1		membrane protein	5	5	1	1	8117	90	4		221	221	221	9645baa8bb46fe9f9ffaa8fccfada4b3_921		7073f0826909e86605b7f24ba93c455b_897	4d8fdf303c55f8e586b180af2243e275_902	2900b96dbbdb35d877a57143d080ad95_912	K_pneumoniae_3_01772
WP_004174089.1		multidrug efflux RND transporter permease subunit	5	5	1	1	8118	90	3		3110	3110	3110	9645baa8bb46fe9f9ffaa8fccfada4b3_923		7073f0826909e86605b7f24ba93c455b_899	4d8fdf303c55f8e586b180af2243e275_910	2900b96dbbdb35d877a57143d080ad95_914	K_pneumoniae_3_01773
WP_023301466.1		efflux RND transporter periplasmic adaptor subunit	5	5	1	1	8119	90	2		1139	1139	1139	9645baa8bb46fe9f9ffaa8fccfada4b3_925		7073f0826909e86605b7f24ba93c455b_901	4d8fdf303c55f8e586b180af2243e275_912	2900b96dbbdb35d877a57143d080ad95_916	K_pneumoniae_3_01774
envR		acrEF/envCD operon transcriptional regulator	5	5	1	1	8120	90	1		653	653	653	9645baa8bb46fe9f9ffaa8fccfada4b3_927		7073f0826909e86605b7f24ba93c455b_903	4d8fdf303c55f8e586b180af2243e275_914	2900b96dbbdb35d877a57143d080ad95_918	K_pneumoniae_3_01775
panF		sodium/pantothenate symporter	5	5	1	1	8124	214	1		1451	1451	1451	9645baa8bb46fe9f9ffaa8fccfada4b3_935		7073f0826909e86605b7f24ba93c455b_911	4d8fdf303c55f8e586b180af2243e275_922	2900b96dbbdb35d877a57143d080ad95_926	K_pneumoniae_3_01779
WP_002918740.1		YhdT family protein	5	5	1	1	8125	214	2		242	242	242	9645baa8bb46fe9f9ffaa8fccfada4b3_937		7073f0826909e86605b7f24ba93c455b_913	4d8fdf303c55f8e586b180af2243e275_924	2900b96dbbdb35d877a57143d080ad95_928	K_pneumoniae_3_01780
accB		acetyl-CoA carboxylase biotin carboxyl carrier protein	5	5	1	1	8129	144	5		467	467	467	9645baa8bb46fe9f9ffaa8fccfada4b3_941		7073f0826909e86605b7f24ba93c455b_917	4d8fdf303c55f8e586b180af2243e275_928	2900b96dbbdb35d877a57143d080ad95_932	K_pneumoniae_3_01782
aroQ		type II 3-dehydroquinate dehydratase	5	5	1	1	8128	144	6		452	452	452	9645baa8bb46fe9f9ffaa8fccfada4b3_943		7073f0826909e86605b7f24ba93c455b_919	4d8fdf303c55f8e586b180af2243e275_930	2900b96dbbdb35d877a57143d080ad95_934	K_pneumoniae_3_01783
msrQ		protein-methionine-sulfoxide reductase heme-binding subunit MsrQ	5	5	1	1	8127	144	4		608	608	608	9645baa8bb46fe9f9ffaa8fccfada4b3_945		7073f0826909e86605b7f24ba93c455b_921	4d8fdf303c55f8e586b180af2243e275_932	2900b96dbbdb35d877a57143d080ad95_936	K_pneumoniae_3_01784
msrP		protein-methionine-sulfoxide reductase catalytic subunit MsrP	5	5	1	1	8126	144	3		1001	1001	1001	9645baa8bb46fe9f9ffaa8fccfada4b3_947		7073f0826909e86605b7f24ba93c455b_923	4d8fdf303c55f8e586b180af2243e275_934	2900b96dbbdb35d877a57143d080ad95_938	K_pneumoniae_3_01785
csrD		RNase E specificity factor CsrD	5	5	1	1	8010	144	1		1940	1940	1940	9645baa8bb46fe9f9ffaa8fccfada4b3_951		7073f0826909e86605b7f24ba93c455b_927	4d8fdf303c55f8e586b180af2243e275_938	2900b96dbbdb35d877a57143d080ad95_942	K_pneumoniae_3_01786
mreD		rod shape-determining protein MreD	5	5	1	1	8136	220	1		488	488	488	9645baa8bb46fe9f9ffaa8fccfada4b3_957		7073f0826909e86605b7f24ba93c455b_933	4d8fdf303c55f8e586b180af2243e275_944	2900b96dbbdb35d877a57143d080ad95_948	K_pneumoniae_3_01789
WP_002918646.1		Maf-like protein	5	5	1	1	8137	220	2		581	581	581	9645baa8bb46fe9f9ffaa8fccfada4b3_959		7073f0826909e86605b7f24ba93c455b_935	4d8fdf303c55f8e586b180af2243e275_946	2900b96dbbdb35d877a57143d080ad95_950	K_pneumoniae_3_01790
yhdP		AsmA2 domain-containing protein YhdP	5	5	1	1	8142	191	1		3797	3797	3797	9645baa8bb46fe9f9ffaa8fccfada4b3_963		7073f0826909e86605b7f24ba93c455b_939	4d8fdf303c55f8e586b180af2243e275_950	2900b96dbbdb35d877a57143d080ad95_954	K_pneumoniae_3_01792
tldD		metalloprotease TldD	5	5	1	1	8143	191	2		1445	1445	1445	9645baa8bb46fe9f9ffaa8fccfada4b3_965		7073f0826909e86605b7f24ba93c455b_941	4d8fdf303c55f8e586b180af2243e275_952	2900b96dbbdb35d877a57143d080ad95_956	K_pneumoniae_3_01793
aaeR		HTH-type transcriptional activator AaeR	5	5	1	1	8144	191	3		929	929	929	9645baa8bb46fe9f9ffaa8fccfada4b3_967		7073f0826909e86605b7f24ba93c455b_943	4d8fdf303c55f8e586b180af2243e275_954	2900b96dbbdb35d877a57143d080ad95_958	K_pneumoniae_3_01794
aaeA		p-hydroxybenzoic acid efflux pump subunit AaeA	5	5	1	1	8151	3	1		932	932	932	9645baa8bb46fe9f9ffaa8fccfada4b3_971		7073f0826909e86605b7f24ba93c455b_947	4d8fdf303c55f8e586b180af2243e275_958	2900b96dbbdb35d877a57143d080ad95_962	K_pneumoniae_3_01796
aaeB		p-hydroxybenzoic acid efflux pump subunit AaeB	5	5	1	1	8150	3	2		1967	1967	1967	9645baa8bb46fe9f9ffaa8fccfada4b3_973		7073f0826909e86605b7f24ba93c455b_949	4d8fdf303c55f8e586b180af2243e275_960	2900b96dbbdb35d877a57143d080ad95_964	K_pneumoniae_3_01797
WP_002918629.1		barstar family protein	5	5	1	1	8149	3	3		275	275	275	9645baa8bb46fe9f9ffaa8fccfada4b3_975		7073f0826909e86605b7f24ba93c455b_951	4d8fdf303c55f8e586b180af2243e275_962	2900b96dbbdb35d877a57143d080ad95_966	K_pneumoniae_3_01798
yhcN-B		DUF1471 family stress response protein YhcN-B	5	5	1	1	8148	3	4		266	266	266	9645baa8bb46fe9f9ffaa8fccfada4b3_977		7073f0826909e86605b7f24ba93c455b_953	4d8fdf303c55f8e586b180af2243e275_964	2900b96dbbdb35d877a57143d080ad95_968	K_pneumoniae_3_01799
mlaB		lipid asymmetry maintenance protein MlaB	5	5	1	1	8211	85	11		287	290	288	9645baa8bb46fe9f9ffaa8fccfada4b3_1071		7073f0826909e86605b7f24ba93c455b_1047	4d8fdf303c55f8e586b180af2243e275_1058	2900b96dbbdb35d877a57143d080ad95_1044	K_pneumoniae_3_01845
argR		transcriptional regulator ArgR	5	5	1	1	8146	3	6		470	470	470	9645baa8bb46fe9f9ffaa8fccfada4b3_981		7073f0826909e86605b7f24ba93c455b_957	4d8fdf303c55f8e586b180af2243e275_968	2900b96dbbdb35d877a57143d080ad95_972	K_pneumoniae_3_01801
mdh		malate dehydrogenase	5	5	1	1	8145	3	118		938	938	938	9645baa8bb46fe9f9ffaa8fccfada4b3_983		7073f0826909e86605b7f24ba93c455b_959	4d8fdf303c55f8e586b180af2243e275_970	2900b96dbbdb35d877a57143d080ad95_974	K_pneumoniae_3_01802
degS		outer membrane-stress sensor serine endopeptidase DegS	5	5	1	1	8003	3	117		1058	1058	1058	9645baa8bb46fe9f9ffaa8fccfada4b3_1003		7073f0826909e86605b7f24ba93c455b_979	4d8fdf303c55f8e586b180af2243e275_990	2900b96dbbdb35d877a57143d080ad95_976	K_pneumoniae_3_01812
degQ		serine endoprotease DegQ	5	5	1	1	8004	3	9		1367	1367	1367	9645baa8bb46fe9f9ffaa8fccfada4b3_1005		7073f0826909e86605b7f24ba93c455b_981	4d8fdf303c55f8e586b180af2243e275_992	2900b96dbbdb35d877a57143d080ad95_978	K_pneumoniae_3_01813
WP_002918565.1		DUF1043 family protein	5	5	1	1	8005	3	8		398	398	398	9645baa8bb46fe9f9ffaa8fccfada4b3_1007		7073f0826909e86605b7f24ba93c455b_983	4d8fdf303c55f8e586b180af2243e275_994	2900b96dbbdb35d877a57143d080ad95_980	K_pneumoniae_3_01814
WP_004144945.1		cell division protein ZapE	5	5	1	1	8006	3	7		1127	1127	1127	9645baa8bb46fe9f9ffaa8fccfada4b3_1009		7073f0826909e86605b7f24ba93c455b_985	4d8fdf303c55f8e586b180af2243e275_996	2900b96dbbdb35d877a57143d080ad95_982	K_pneumoniae_3_01815
sspA		stringent starvation protein A	5	5	1	1	8181	93	13		638	638	638	9645baa8bb46fe9f9ffaa8fccfada4b3_1017		7073f0826909e86605b7f24ba93c455b_993	4d8fdf303c55f8e586b180af2243e275_1004	2900b96dbbdb35d877a57143d080ad95_990	K_pneumoniae_3_01818
sspB		ClpXP protease specificity-enhancing factor	5	5	1	1	8182	93	12		494	494	494	9645baa8bb46fe9f9ffaa8fccfada4b3_1019		7073f0826909e86605b7f24ba93c455b_995	4d8fdf303c55f8e586b180af2243e275_1006	2900b96dbbdb35d877a57143d080ad95_992	K_pneumoniae_3_01819
WP_002918461.1		glutamate synthase small subunit	5	5	1	1	8184	93	10		1418	1418	1418	9645baa8bb46fe9f9ffaa8fccfada4b3_1023		7073f0826909e86605b7f24ba93c455b_999	4d8fdf303c55f8e586b180af2243e275_1010	2900b96dbbdb35d877a57143d080ad95_996	K_pneumoniae_3_01821
gltB		glutamate synthase large subunit	5	5	1	1	8185	93	9		4460	4460	4460	9645baa8bb46fe9f9ffaa8fccfada4b3_1025		7073f0826909e86605b7f24ba93c455b_1001	4d8fdf303c55f8e586b180af2243e275_1012	2900b96dbbdb35d877a57143d080ad95_998	K_pneumoniae_3_01822
WP_002918455.1		TIGR01212 family radical SAM protein	5	5	1	1	8186	93	8		932	932	932	9645baa8bb46fe9f9ffaa8fccfada4b3_1027		7073f0826909e86605b7f24ba93c455b_1003	4d8fdf303c55f8e586b180af2243e275_1014	2900b96dbbdb35d877a57143d080ad95_1000	K_pneumoniae_3_01823
WP_002918453.1		MFS transporter	5	5	1	1	8187	93	7		1283	1283	1283	9645baa8bb46fe9f9ffaa8fccfada4b3_1029		7073f0826909e86605b7f24ba93c455b_1005	4d8fdf303c55f8e586b180af2243e275_1016	2900b96dbbdb35d877a57143d080ad95_1002	K_pneumoniae_3_01824
WP_002918451.1		Zn-dependent oxidoreductase	5	5	1	1	8188	93	6		1016	1016	1016	9645baa8bb46fe9f9ffaa8fccfada4b3_1031		7073f0826909e86605b7f24ba93c455b_1007	4d8fdf303c55f8e586b180af2243e275_1018	2900b96dbbdb35d877a57143d080ad95_1004	K_pneumoniae_3_01825
group_1360	uxuA	mannonate dehydratase	5	5	1	1	8189	93	5		1064	1064	1064	9645baa8bb46fe9f9ffaa8fccfada4b3_1033		7073f0826909e86605b7f24ba93c455b_1009	4d8fdf303c55f8e586b180af2243e275_1020	2900b96dbbdb35d877a57143d080ad95_1006	K_pneumoniae_3_01826
arcB		aerobic respiration two-component sensor histidine kinase ArcB	5	5	1	1	8190	93	4		2339	2339	2339	9645baa8bb46fe9f9ffaa8fccfada4b3_1035		7073f0826909e86605b7f24ba93c455b_1011	4d8fdf303c55f8e586b180af2243e275_1022	2900b96dbbdb35d877a57143d080ad95_1008	K_pneumoniae_3_01827
elbB		isoprenoid biosynthesis glyoxalase ElbB	5	5	1	1	8191	93	3		653	653	653	9645baa8bb46fe9f9ffaa8fccfada4b3_1037		7073f0826909e86605b7f24ba93c455b_1013	4d8fdf303c55f8e586b180af2243e275_1024	2900b96dbbdb35d877a57143d080ad95_1010	K_pneumoniae_3_01828
mtgA		monofunctional biosynthetic peptidoglycan transglycosylase	5	5	1	1	8192	93	2		725	725	725	9645baa8bb46fe9f9ffaa8fccfada4b3_1039		7073f0826909e86605b7f24ba93c455b_1015	4d8fdf303c55f8e586b180af2243e275_1026	2900b96dbbdb35d877a57143d080ad95_1012	K_pneumoniae_3_01829
ptsN		PTS IIA-like nitrogen regulatory protein PtsN	5	5	1	1	8198	178	3		488	488	488	9645baa8bb46fe9f9ffaa8fccfada4b3_1045		7073f0826909e86605b7f24ba93c455b_1021	4d8fdf303c55f8e586b180af2243e275_1032	2900b96dbbdb35d877a57143d080ad95_1018	K_pneumoniae_3_01832
hpf		ribosome hibernation promoting factor	5	5	1	1	8199	178	2		287	287	287	9645baa8bb46fe9f9ffaa8fccfada4b3_1047		7073f0826909e86605b7f24ba93c455b_1023	4d8fdf303c55f8e586b180af2243e275_1034	2900b96dbbdb35d877a57143d080ad95_1020	K_pneumoniae_3_01833
rpoN		RNA polymerase factor sigma-54	5	5	1	1	8200	178	1		1433	1433	1433	9645baa8bb46fe9f9ffaa8fccfada4b3_1049		7073f0826909e86605b7f24ba93c455b_1025	4d8fdf303c55f8e586b180af2243e275_1036	2900b96dbbdb35d877a57143d080ad95_1022	K_pneumoniae_3_01834
lptA		lipopolysaccharide ABC transporter substrate-binding protein LptA	5	5	1	1	8202	85	1		545	545	545	9645baa8bb46fe9f9ffaa8fccfada4b3_1053		7073f0826909e86605b7f24ba93c455b_1029	4d8fdf303c55f8e586b180af2243e275_1040	2900b96dbbdb35d877a57143d080ad95_1026	K_pneumoniae_3_01836
lptC		LPS export ABC transporter periplasmic protein LptC	5	5	1	1	8203	85	2		575	575	575	9645baa8bb46fe9f9ffaa8fccfada4b3_1055		7073f0826909e86605b7f24ba93c455b_1031	4d8fdf303c55f8e586b180af2243e275_1042	2900b96dbbdb35d877a57143d080ad95_1028	K_pneumoniae_3_01837
kdsC		3-deoxy-manno-octulosonate-8-phosphatase KdsC	5	5	1	1	8204	85	3		566	566	566	9645baa8bb46fe9f9ffaa8fccfada4b3_1057		7073f0826909e86605b7f24ba93c455b_1033	4d8fdf303c55f8e586b180af2243e275_1044	2900b96dbbdb35d877a57143d080ad95_1030	K_pneumoniae_3_01838
kdsD		arabinose-5-phosphate isomerase KdsD	5	5	1	1	8205	85	4		986	986	986	9645baa8bb46fe9f9ffaa8fccfada4b3_1059		7073f0826909e86605b7f24ba93c455b_1035	4d8fdf303c55f8e586b180af2243e275_1046	2900b96dbbdb35d877a57143d080ad95_1032	K_pneumoniae_3_01839
WP_002918397.1		calcium/sodium antiporter	5	5	1	1	8206	85	5		977	977	977	9645baa8bb46fe9f9ffaa8fccfada4b3_1061		7073f0826909e86605b7f24ba93c455b_1037	4d8fdf303c55f8e586b180af2243e275_1048	2900b96dbbdb35d877a57143d080ad95_1034	K_pneumoniae_3_01840
mlaF		phospholipid ABC transporter ATP-binding protein MlaF	5	5	1	1	8207	85	6		812	812	812	9645baa8bb46fe9f9ffaa8fccfada4b3_1063		7073f0826909e86605b7f24ba93c455b_1039	4d8fdf303c55f8e586b180af2243e275_1050	2900b96dbbdb35d877a57143d080ad95_1036	K_pneumoniae_3_01841
mlaE		lipid asymmetry maintenance ABC transporter permease subunit MlaE	5	5	1	1	8208	85	14		782	782	782	9645baa8bb46fe9f9ffaa8fccfada4b3_1065		7073f0826909e86605b7f24ba93c455b_1041	4d8fdf303c55f8e586b180af2243e275_1052	2900b96dbbdb35d877a57143d080ad95_1038	K_pneumoniae_3_01842
mlaD		outer membrane lipid asymmetry maintenance protein MlaD	5	5	1	1	8209	85	13		551	551	551	9645baa8bb46fe9f9ffaa8fccfada4b3_1067		7073f0826909e86605b7f24ba93c455b_1043	4d8fdf303c55f8e586b180af2243e275_1054	2900b96dbbdb35d877a57143d080ad95_1040	K_pneumoniae_3_01843
mlaC		phospholipid-binding protein MlaC	5	5	1	1	8210	85	12		635	635	635	9645baa8bb46fe9f9ffaa8fccfada4b3_1069		7073f0826909e86605b7f24ba93c455b_1045	4d8fdf303c55f8e586b180af2243e275_1056	2900b96dbbdb35d877a57143d080ad95_1042	K_pneumoniae_3_01844
ibaG		BolA family iron metabolism protein IbaG	5	5	1	1	8212	85	10		254	254	254	9645baa8bb46fe9f9ffaa8fccfada4b3_1073		7073f0826909e86605b7f24ba93c455b_1049	4d8fdf303c55f8e586b180af2243e275_1060	2900b96dbbdb35d877a57143d080ad95_1046	K_pneumoniae_3_01846
murA		UDP-N-acetylglucosamine 1-carboxyvinyltransferase	5	5	1	1	8213	85	9		1259	1259	1259	9645baa8bb46fe9f9ffaa8fccfada4b3_1075		7073f0826909e86605b7f24ba93c455b_1051	4d8fdf303c55f8e586b180af2243e275_1062	2900b96dbbdb35d877a57143d080ad95_1048	K_pneumoniae_3_01847
sfsB		DNA-binding transcriptional regulator SfsB	5	5	1	1	8214	85	8		272	272	272	9645baa8bb46fe9f9ffaa8fccfada4b3_1077		7073f0826909e86605b7f24ba93c455b_1053	4d8fdf303c55f8e586b180af2243e275_1064	2900b96dbbdb35d877a57143d080ad95_1050	K_pneumoniae_3_01848
ispB		octaprenyl diphosphate synthase	5	5	1	1	8215	85	7		971	971	971	9645baa8bb46fe9f9ffaa8fccfada4b3_1079		7073f0826909e86605b7f24ba93c455b_1055	4d8fdf303c55f8e586b180af2243e275_1066	2900b96dbbdb35d877a57143d080ad95_1052	K_pneumoniae_3_01849
rpmA		50S ribosomal protein L27	5	5	1	1	8217	136	1		257	257	257	9645baa8bb46fe9f9ffaa8fccfada4b3_1083		7073f0826909e86605b7f24ba93c455b_1059	4d8fdf303c55f8e586b180af2243e275_1070	2900b96dbbdb35d877a57143d080ad95_1056	K_pneumoniae_3_01851
WP_004149938.1		DMT family transporter	5	5	1	1	8218	136	6		965	965	965	9645baa8bb46fe9f9ffaa8fccfada4b3_1085		7073f0826909e86605b7f24ba93c455b_1061	4d8fdf303c55f8e586b180af2243e275_1072	2900b96dbbdb35d877a57143d080ad95_1058	K_pneumoniae_3_01852
cgtA		Obg family GTPase CgtA	5	5	1	1	8219	136	5		1178	1178	1178	9645baa8bb46fe9f9ffaa8fccfada4b3_1087		7073f0826909e86605b7f24ba93c455b_1063	4d8fdf303c55f8e586b180af2243e275_1074	2900b96dbbdb35d877a57143d080ad95_1060	K_pneumoniae_3_01853
dacB		serine-type D-Ala-D-Ala carboxypeptidase	5	5	1	1	8220	136	4		1433	1433	1433	9645baa8bb46fe9f9ffaa8fccfada4b3_1089		7073f0826909e86605b7f24ba93c455b_1065	4d8fdf303c55f8e586b180af2243e275_1076	2900b96dbbdb35d877a57143d080ad95_1062	K_pneumoniae_3_01854
greA		transcription elongation factor GreA	5	5	1	1	8221	136	3		476	476	476	9645baa8bb46fe9f9ffaa8fccfada4b3_1091		7073f0826909e86605b7f24ba93c455b_1067	4d8fdf303c55f8e586b180af2243e275_1078	2900b96dbbdb35d877a57143d080ad95_1064	K_pneumoniae_3_01855
folP		dihydropteroate synthase	5	5	1	1	8229	139	1		848	848	848	9645baa8bb46fe9f9ffaa8fccfada4b3_1099		7073f0826909e86605b7f24ba93c455b_1075	4d8fdf303c55f8e586b180af2243e275_1086	2900b96dbbdb35d877a57143d080ad95_1072	K_pneumoniae_3_01859
glmM		phosphoglucosamine mutase	5	5	1	1	8228	139	2		1337	1337	1337	9645baa8bb46fe9f9ffaa8fccfada4b3_1101		7073f0826909e86605b7f24ba93c455b_1077	4d8fdf303c55f8e586b180af2243e275_1088	2900b96dbbdb35d877a57143d080ad95_1074	K_pneumoniae_3_01860
secG		preprotein translocase subunit SecG	5	5	1	1	8227	139	6		329	329	329	9645baa8bb46fe9f9ffaa8fccfada4b3_1103		7073f0826909e86605b7f24ba93c455b_1079	4d8fdf303c55f8e586b180af2243e275_1090	2900b96dbbdb35d877a57143d080ad95_1076	K_pneumoniae_3_01861
WP_032420620.1		YfaZ family outer membrane protein	5	5	1	1	8225	139	4		551	551	551	9645baa8bb46fe9f9ffaa8fccfada4b3_1110		7073f0826909e86605b7f24ba93c455b_1086	4d8fdf303c55f8e586b180af2243e275_1097	2900b96dbbdb35d877a57143d080ad95_1083	K_pneumoniae_3_01864
WP_004185827.1		winged helix-turn-helix transcriptional regulator	5	5	1	1	8224	139	3		629	629	629	9645baa8bb46fe9f9ffaa8fccfada4b3_1112		7073f0826909e86605b7f24ba93c455b_1088	4d8fdf303c55f8e586b180af2243e275_1099	2900b96dbbdb35d877a57143d080ad95_1085	K_pneumoniae_3_01865
infB		translation initiation factor IF-2	5	5	1	1	8237	253	1		2690	2690	2690	9645baa8bb46fe9f9ffaa8fccfada4b3_1123		7073f0826909e86605b7f24ba93c455b_1099	4d8fdf303c55f8e586b180af2243e275_1110	2900b96dbbdb35d877a57143d080ad95_1096	K_pneumoniae_3_01870
truB		tRNA pseudouridine(55) synthase TruB	5	5	1	1	8243	199	1		944	944	944	9645baa8bb46fe9f9ffaa8fccfada4b3_1127		7073f0826909e86605b7f24ba93c455b_1103	4d8fdf303c55f8e586b180af2243e275_1114	2900b96dbbdb35d877a57143d080ad95_1100	K_pneumoniae_3_01872
rpsO		30S ribosomal protein S15	5	5	1	1	8244	199	2		269	269	269	9645baa8bb46fe9f9ffaa8fccfada4b3_1129		7073f0826909e86605b7f24ba93c455b_1105	4d8fdf303c55f8e586b180af2243e275_1116	2900b96dbbdb35d877a57143d080ad95_1102	K_pneumoniae_3_01873
nlpI		lipoprotein NlpI	5	5	1	1	7959	101	11		884	884	884	9645baa8bb46fe9f9ffaa8fccfada4b3_1133		7073f0826909e86605b7f24ba93c455b_1109	4d8fdf303c55f8e586b180af2243e275_1120	2900b96dbbdb35d877a57143d080ad95_1106	K_pneumoniae_3_01875
deaD		ATP-dependent RNA helicase DeaD	5	5	1	1	7957	101	13		1931	1931	1931	9645baa8bb46fe9f9ffaa8fccfada4b3_1137		7073f0826909e86605b7f24ba93c455b_1113	4d8fdf303c55f8e586b180af2243e275_1124	2900b96dbbdb35d877a57143d080ad95_1110	K_pneumoniae_3_01876
mtr		tryptophan permease	5	5	1	1	7956	101	18		1244	1244	1244	9645baa8bb46fe9f9ffaa8fccfada4b3_1139		7073f0826909e86605b7f24ba93c455b_1115	4d8fdf303c55f8e586b180af2243e275_1126	2900b96dbbdb35d877a57143d080ad95_1112	K_pneumoniae_3_01877
WP_002918234.1		LLM class flavin-dependent oxidoreductase	5	5	1	1	8260	101	17		1007	1007	1007	9645baa8bb46fe9f9ffaa8fccfada4b3_1141		7073f0826909e86605b7f24ba93c455b_1117	4d8fdf303c55f8e586b180af2243e275_1128	2900b96dbbdb35d877a57143d080ad95_1140	K_pneumoniae_3_01892
WP_002918233.1		U32 family peptidase	5	5	1	1	8261	101	16		878	878	878	9645baa8bb46fe9f9ffaa8fccfada4b3_1143		7073f0826909e86605b7f24ba93c455b_1119	4d8fdf303c55f8e586b180af2243e275_1130	2900b96dbbdb35d877a57143d080ad95_1142	K_pneumoniae_3_01893
WP_002918231.1		SCP2 domain-containing protein	5	5	1	1	8263	120	1		524	524	524	9645baa8bb46fe9f9ffaa8fccfada4b3_1147		7073f0826909e86605b7f24ba93c455b_1123	4d8fdf303c55f8e586b180af2243e275_1134	2900b96dbbdb35d877a57143d080ad95_1146	K_pneumoniae_3_01895
WP_020316982.1		HlyD family efflux transporter periplasmic adaptor subunit	5	6	1.2	1	9128				314	965	753	9645baa8bb46fe9f9ffaa8fccfada4b3_270		7073f0826909e86605b7f24ba93c455b_253	4d8fdf303c55f8e586b180af2243e275_257 4d8fdf303c55f8e586b180af2243e275_253	2900b96dbbdb35d877a57143d080ad95_265	K_pneumoniae_3_02447
WP_002918229.1		N-acetyltransferase	5	5	1	1	8264	120	2		503	503	503	9645baa8bb46fe9f9ffaa8fccfada4b3_1149		7073f0826909e86605b7f24ba93c455b_1125	4d8fdf303c55f8e586b180af2243e275_1136	2900b96dbbdb35d877a57143d080ad95_1148	K_pneumoniae_3_01896
WP_002918223.1		YhbP family protein	5	5	1	1	8266	120	4		443	443	443	9645baa8bb46fe9f9ffaa8fccfada4b3_1153		7073f0826909e86605b7f24ba93c455b_1129	4d8fdf303c55f8e586b180af2243e275_1140	2900b96dbbdb35d877a57143d080ad95_1152	K_pneumoniae_3_01898
WP_002918221.1		type 1 glutamine amidotransferase	5	5	1	1	8267	120	5		536	536	536	9645baa8bb46fe9f9ffaa8fccfada4b3_1155		7073f0826909e86605b7f24ba93c455b_1131	4d8fdf303c55f8e586b180af2243e275_1142	2900b96dbbdb35d877a57143d080ad95_1154	K_pneumoniae_3_01899
WP_004181410.1		NAD(P)H-binding protein	5	5	1	1	8268	120	6		647	647	647	9645baa8bb46fe9f9ffaa8fccfada4b3_1157		7073f0826909e86605b7f24ba93c455b_1133	4d8fdf303c55f8e586b180af2243e275_1144	2900b96dbbdb35d877a57143d080ad95_1156	K_pneumoniae_3_01900
yraP		divisome-associated lipoprotein YraP	5	5	1	1	8270	120	8		575	575	575	9645baa8bb46fe9f9ffaa8fccfada4b3_1161		7073f0826909e86605b7f24ba93c455b_1137	4d8fdf303c55f8e586b180af2243e275_1148	2900b96dbbdb35d877a57143d080ad95_1160	K_pneumoniae_3_01902
WP_002918206.1		YraN family protein	5	5	1	1	7941	134	1		386	386	386	9645baa8bb46fe9f9ffaa8fccfada4b3_1165		7073f0826909e86605b7f24ba93c455b_1141	4d8fdf303c55f8e586b180af2243e275_1152	2900b96dbbdb35d877a57143d080ad95_1164	K_pneumoniae_3_01904
WP_020802042.1		penicillin-binding protein activator	5	5	1	1	7940	134	2		2108	2108	2108	9645baa8bb46fe9f9ffaa8fccfada4b3_1167		7073f0826909e86605b7f24ba93c455b_1143	4d8fdf303c55f8e586b180af2243e275_1154	2900b96dbbdb35d877a57143d080ad95_1166	K_pneumoniae_3_01905
rsmI		16S rRNA (cytidine(1402)-2'-O)-methyltransferase	5	5	1	1	7939	134	3		863	863	863	9645baa8bb46fe9f9ffaa8fccfada4b3_1169		7073f0826909e86605b7f24ba93c455b_1145	4d8fdf303c55f8e586b180af2243e275_1156	2900b96dbbdb35d877a57143d080ad95_1168	K_pneumoniae_3_01906
garD		galactarate dehydratase	5	5	1	1	7938	134	4		1571	1571	1571	9645baa8bb46fe9f9ffaa8fccfada4b3_1171		7073f0826909e86605b7f24ba93c455b_1147	4d8fdf303c55f8e586b180af2243e275_1158	2900b96dbbdb35d877a57143d080ad95_1170	K_pneumoniae_3_01907
WP_004181408.1		MFS transporter	5	5	1	1	8294	134	6		1331	1331	1331	9645baa8bb46fe9f9ffaa8fccfada4b3_1173		7073f0826909e86605b7f24ba93c455b_1149	4d8fdf303c55f8e586b180af2243e275_1160	2900b96dbbdb35d877a57143d080ad95_1172	K_pneumoniae_3_01909
garL		2-dehydro-3-deoxyglucarate aldolase	5	5	1	1	8295	134	5		770	770	770	9645baa8bb46fe9f9ffaa8fccfada4b3_1175		7073f0826909e86605b7f24ba93c455b_1151	4d8fdf303c55f8e586b180af2243e275_1162	2900b96dbbdb35d877a57143d080ad95_1174	K_pneumoniae_3_01910
WP_004150939.1		OB-fold putative lipoprotein	5	5	1	1	7920	73	17		464	464	464	9645baa8bb46fe9f9ffaa8fccfada4b3_1184		7073f0826909e86605b7f24ba93c455b_1160	4d8fdf303c55f8e586b180af2243e275_1171	2900b96dbbdb35d877a57143d080ad95_1183	K_pneumoniae_3_01914
WP_004149907.1		Spy/CpxP family protein refolding chaperone	5	5	1	1	7921	73	15		410	410	410	9645baa8bb46fe9f9ffaa8fccfada4b3_1186		7073f0826909e86605b7f24ba93c455b_1162	4d8fdf303c55f8e586b180af2243e275_1173	2900b96dbbdb35d877a57143d080ad95_1185	K_pneumoniae_3_01915
WP_002917926.1		hypothetical protein	5	5	1	1	7922	73	14		167	167	167	9645baa8bb46fe9f9ffaa8fccfada4b3_1188		7073f0826909e86605b7f24ba93c455b_1164	4d8fdf303c55f8e586b180af2243e275_1175	2900b96dbbdb35d877a57143d080ad95_1187	K_pneumoniae_3_01916
WP_002917925.1		pirin family protein	5	5	1	1	7923	73	13		701	701	701	9645baa8bb46fe9f9ffaa8fccfada4b3_1190		7073f0826909e86605b7f24ba93c455b_1166	4d8fdf303c55f8e586b180af2243e275_1177	2900b96dbbdb35d877a57143d080ad95_1189	K_pneumoniae_3_01917
WP_004144865.1		LysR family transcriptional regulator	5	5	1	1	7924	73	12		896	896	896	9645baa8bb46fe9f9ffaa8fccfada4b3_1192		7073f0826909e86605b7f24ba93c455b_1168	4d8fdf303c55f8e586b180af2243e275_1179	2900b96dbbdb35d877a57143d080ad95_1191	K_pneumoniae_3_01918
WP_002917923.1		DUF805 domain-containing protein	5	5	1	1	7925	73	11		368	368	368	9645baa8bb46fe9f9ffaa8fccfada4b3_1194		7073f0826909e86605b7f24ba93c455b_1170	4d8fdf303c55f8e586b180af2243e275_1181	2900b96dbbdb35d877a57143d080ad95_1193	K_pneumoniae_3_01919
WP_002917922.1		glutathione S-transferase family protein	5	5	1	1	7926	73	10		986	986	986	9645baa8bb46fe9f9ffaa8fccfada4b3_1196		7073f0826909e86605b7f24ba93c455b_1172	4d8fdf303c55f8e586b180af2243e275_1183	2900b96dbbdb35d877a57143d080ad95_1195	K_pneumoniae_3_01920
WP_002917920.1		DoxX family protein	5	5	1	1	7927	73	9		392	392	392	9645baa8bb46fe9f9ffaa8fccfada4b3_1198		7073f0826909e86605b7f24ba93c455b_1174	4d8fdf303c55f8e586b180af2243e275_1185	2900b96dbbdb35d877a57143d080ad95_1197	K_pneumoniae_3_01921
WP_002917917.1		phage holin family protein	5	5	1	1	7929	73	7		398	398	398	9645baa8bb46fe9f9ffaa8fccfada4b3_1202		7073f0826909e86605b7f24ba93c455b_1178	4d8fdf303c55f8e586b180af2243e275_1189	2900b96dbbdb35d877a57143d080ad95_1201	K_pneumoniae_3_01923
WP_002917916.1		YqjD family protein	5	5	1	1	7930	73	6		305	305	305	9645baa8bb46fe9f9ffaa8fccfada4b3_1204		7073f0826909e86605b7f24ba93c455b_1180	4d8fdf303c55f8e586b180af2243e275_1191	2900b96dbbdb35d877a57143d080ad95_1203	K_pneumoniae_3_01924
WP_004144860.1		DUF1090 domain-containing protein	5	5	1	1	7931	73	5		368	368	368	9645baa8bb46fe9f9ffaa8fccfada4b3_1206		7073f0826909e86605b7f24ba93c455b_1182	4d8fdf303c55f8e586b180af2243e275_1193	2900b96dbbdb35d877a57143d080ad95_1205	K_pneumoniae_3_01925
WP_002917909.1		DedA family protein	5	5	1	1	7933	73	3		662	662	662	9645baa8bb46fe9f9ffaa8fccfada4b3_1210		7073f0826909e86605b7f24ba93c455b_1186	4d8fdf303c55f8e586b180af2243e275_1197	2900b96dbbdb35d877a57143d080ad95_1209	K_pneumoniae_3_01927
exuR		transcriptional regulator ExuR	5	5	1	1	7934	73	2		776	776	776	9645baa8bb46fe9f9ffaa8fccfada4b3_1212		7073f0826909e86605b7f24ba93c455b_1188	4d8fdf303c55f8e586b180af2243e275_1199	2900b96dbbdb35d877a57143d080ad95_1211	K_pneumoniae_3_01928
WP_002917905.1		MFS transporter	5	5	1	1	7935	73	1		1301	1301	1301	9645baa8bb46fe9f9ffaa8fccfada4b3_1214		7073f0826909e86605b7f24ba93c455b_1190	4d8fdf303c55f8e586b180af2243e275_1201	2900b96dbbdb35d877a57143d080ad95_1213	K_pneumoniae_3_01929
WP_002917898.1		altronate dehydratase family protein	5	5	1	1	8383	11	30		1487	1487	1487	9645baa8bb46fe9f9ffaa8fccfada4b3_1218		7073f0826909e86605b7f24ba93c455b_1194	4d8fdf303c55f8e586b180af2243e275_1205	2900b96dbbdb35d877a57143d080ad95_1217	K_pneumoniae_3_01931
WP_002917897.1		YgjV family protein	5	5	1	1	8382	11	31		554	554	554	9645baa8bb46fe9f9ffaa8fccfada4b3_1220		7073f0826909e86605b7f24ba93c455b_1196	4d8fdf303c55f8e586b180af2243e275_1207	2900b96dbbdb35d877a57143d080ad95_1219	K_pneumoniae_3_01932
sstT		serine/threonine transporter SstT	5	5	1	1	8381	11	32		1247	1247	1247	9645baa8bb46fe9f9ffaa8fccfada4b3_1222		7073f0826909e86605b7f24ba93c455b_1198	4d8fdf303c55f8e586b180af2243e275_1209	2900b96dbbdb35d877a57143d080ad95_1221	K_pneumoniae_3_01933
WP_004144845.1		TerC family protein	5	5	1	1	8380	11	33		971	971	971	9645baa8bb46fe9f9ffaa8fccfada4b3_1224		7073f0826909e86605b7f24ba93c455b_1200	4d8fdf303c55f8e586b180af2243e275_1211	2900b96dbbdb35d877a57143d080ad95_1223	K_pneumoniae_3_01934
WP_004149902.1		Gfo/Idh/MocA family oxidoreductase	5	5	1	1	8379	11	34		989	989	989	9645baa8bb46fe9f9ffaa8fccfada4b3_1226		7073f0826909e86605b7f24ba93c455b_1202	4d8fdf303c55f8e586b180af2243e275_1213	2900b96dbbdb35d877a57143d080ad95_1225	K_pneumoniae_3_01935
WP_004144843.1		M48 family metallopeptidase	5	5	1	1	8378	11	35		500	500	500	9645baa8bb46fe9f9ffaa8fccfada4b3_1228		7073f0826909e86605b7f24ba93c455b_1204	4d8fdf303c55f8e586b180af2243e275_1215	2900b96dbbdb35d877a57143d080ad95_1227	K_pneumoniae_3_01936
WP_004144842.1		XRE family transcriptional regulator	5	5	1	1	8377	11	36		602	602	602	9645baa8bb46fe9f9ffaa8fccfada4b3_1230		7073f0826909e86605b7f24ba93c455b_1206	4d8fdf303c55f8e586b180af2243e275_1217	2900b96dbbdb35d877a57143d080ad95_1229	K_pneumoniae_3_01937
WP_002917889.1		B3/4 domain-containing protein	5	5	1	1	8376	11	37		707	707	707	9645baa8bb46fe9f9ffaa8fccfada4b3_1232		7073f0826909e86605b7f24ba93c455b_1208	4d8fdf303c55f8e586b180af2243e275_1219	2900b96dbbdb35d877a57143d080ad95_1231	K_pneumoniae_3_01938
rlmG		23S rRNA (guanine(1835)-N(2))-methyltransferase RlmG	5	5	1	1	8375	11	38		1130	1130	1130	9645baa8bb46fe9f9ffaa8fccfada4b3_1234		7073f0826909e86605b7f24ba93c455b_1210	4d8fdf303c55f8e586b180af2243e275_1221	2900b96dbbdb35d877a57143d080ad95_1233	K_pneumoniae_3_01939
WP_004181395.1		NADPH-dependent 2,4-dienoyl-CoA reductase	5	5	1	1	8374	11	39		2021	2021	2021	9645baa8bb46fe9f9ffaa8fccfada4b3_1236		7073f0826909e86605b7f24ba93c455b_1212	4d8fdf303c55f8e586b180af2243e275_1223	2900b96dbbdb35d877a57143d080ad95_1235	K_pneumoniae_3_01940
lsrK		autoinducer-2 kinase	5	5	1	1	8373	11	40		1598	1598	1598	9645baa8bb46fe9f9ffaa8fccfada4b3_1238		7073f0826909e86605b7f24ba93c455b_1214	4d8fdf303c55f8e586b180af2243e275_1225	2900b96dbbdb35d877a57143d080ad95_1237	K_pneumoniae_3_01941
lsrR		transcriptional regulator LsrR	5	5	1	1	8372	11	41		971	971	971	9645baa8bb46fe9f9ffaa8fccfada4b3_1240		7073f0826909e86605b7f24ba93c455b_1216	4d8fdf303c55f8e586b180af2243e275_1227	2900b96dbbdb35d877a57143d080ad95_1239	K_pneumoniae_3_01942
lsrA		autoinducer 2 ABC transporter ATP-binding protein LsrA	5	5	1	1	8371	11	42		1487	1487	1487	9645baa8bb46fe9f9ffaa8fccfada4b3_1242		7073f0826909e86605b7f24ba93c455b_1218	4d8fdf303c55f8e586b180af2243e275_1229	2900b96dbbdb35d877a57143d080ad95_1241	K_pneumoniae_3_01943
lsrC		autoinducer 2 ABC transporter permease LsrC	5	5	1	1	8370	11	43		1034	1034	1034	9645baa8bb46fe9f9ffaa8fccfada4b3_1244		7073f0826909e86605b7f24ba93c455b_1220	4d8fdf303c55f8e586b180af2243e275_1231	2900b96dbbdb35d877a57143d080ad95_1243	K_pneumoniae_3_01944
WP_002917727.1		histidine kinase	5	5	1	1	8369	11	44		998	998	998	9645baa8bb46fe9f9ffaa8fccfada4b3_1246		7073f0826909e86605b7f24ba93c455b_1222	4d8fdf303c55f8e586b180af2243e275_1233	2900b96dbbdb35d877a57143d080ad95_1245	K_pneumoniae_3_01945
lsrB		autoinducer 2 ABC transporter substrate-binding protein LsrB	5	5	1	1	8368	11	45		1001	1001	1001	9645baa8bb46fe9f9ffaa8fccfada4b3_1248		7073f0826909e86605b7f24ba93c455b_1224	4d8fdf303c55f8e586b180af2243e275_1235	2900b96dbbdb35d877a57143d080ad95_1247	K_pneumoniae_3_01946
lsrF		3-hydroxy-5-phosphonooxypentane-2,4-dione thiolase	5	5	1	1	8367	11	46		887	887	887	9645baa8bb46fe9f9ffaa8fccfada4b3_1250		7073f0826909e86605b7f24ba93c455b_1226	4d8fdf303c55f8e586b180af2243e275_1237	2900b96dbbdb35d877a57143d080ad95_1249	K_pneumoniae_3_01947
lsrG		(4S)-4-hydroxy-5-phosphonooxypentane-2,3-dione isomerase	5	5	1	1	8366	11	47		296	296	296	9645baa8bb46fe9f9ffaa8fccfada4b3_1252		7073f0826909e86605b7f24ba93c455b_1228	4d8fdf303c55f8e586b180af2243e275_1239	2900b96dbbdb35d877a57143d080ad95_1251	K_pneumoniae_3_01948
ygjG		putrescine aminotransferase	5	5	1	1	8365	11	48		1379	1379	1379	9645baa8bb46fe9f9ffaa8fccfada4b3_1254		7073f0826909e86605b7f24ba93c455b_1230	4d8fdf303c55f8e586b180af2243e275_1241	2900b96dbbdb35d877a57143d080ad95_1253	K_pneumoniae_3_01949
WP_002917718.1		PadR family transcriptional regulator	5	5	1	1	8364	11	49		554	554	554	9645baa8bb46fe9f9ffaa8fccfada4b3_1256		7073f0826909e86605b7f24ba93c455b_1232	4d8fdf303c55f8e586b180af2243e275_1243	2900b96dbbdb35d877a57143d080ad95_1255	K_pneumoniae_3_01950
WP_004144829.1		siderophore-interacting protein	5	5	1	1	8363	11	50		776	776	776	9645baa8bb46fe9f9ffaa8fccfada4b3_1258		7073f0826909e86605b7f24ba93c455b_1234	4d8fdf303c55f8e586b180af2243e275_1245	2900b96dbbdb35d877a57143d080ad95_1257	K_pneumoniae_3_01951
WP_172879258.1		glycerone kinase	5	5	1	1	8362	11	51		1649	1649	1649	9645baa8bb46fe9f9ffaa8fccfada4b3_1260		7073f0826909e86605b7f24ba93c455b_1236	4d8fdf303c55f8e586b180af2243e275_1247	2900b96dbbdb35d877a57143d080ad95_1259	K_pneumoniae_3_01952
dhaM		dihydroxyacetone kinase subunit DhaM	5	5	1	1	8361	11	52		1421	1421	1421	9645baa8bb46fe9f9ffaa8fccfada4b3_1262		7073f0826909e86605b7f24ba93c455b_1238	4d8fdf303c55f8e586b180af2243e275_1249	2900b96dbbdb35d877a57143d080ad95_1261	K_pneumoniae_3_01953
dhaL		dihydroxyacetone kinase ADP-binding subunit DhaL	5	5	1	1	8360	11	53		632	632	632	9645baa8bb46fe9f9ffaa8fccfada4b3_1264		7073f0826909e86605b7f24ba93c455b_1240	4d8fdf303c55f8e586b180af2243e275_1251	2900b96dbbdb35d877a57143d080ad95_1263	K_pneumoniae_3_01954
dhaK		dihydroxyacetone kinase subunit DhaK	5	5	1	1	8359	11	54		1070	1070	1070	9645baa8bb46fe9f9ffaa8fccfada4b3_1266		7073f0826909e86605b7f24ba93c455b_1242	4d8fdf303c55f8e586b180af2243e275_1253	2900b96dbbdb35d877a57143d080ad95_1265	K_pneumoniae_3_01955
WP_002917681.1		glycerol dehydrogenase	5	5	1	1	8357	11	56		1097	1097	1097	9645baa8bb46fe9f9ffaa8fccfada4b3_1270		7073f0826909e86605b7f24ba93c455b_1246	4d8fdf303c55f8e586b180af2243e275_1257	2900b96dbbdb35d877a57143d080ad95_1269	K_pneumoniae_3_01956
dhaR		PTS-dependent dihydroxyacetone kinase operon transcriptional regulator DhaR	5	5	1	1	8356	11	57		1925	1925	1925	9645baa8bb46fe9f9ffaa8fccfada4b3_1272		7073f0826909e86605b7f24ba93c455b_1248	4d8fdf303c55f8e586b180af2243e275_1259	2900b96dbbdb35d877a57143d080ad95_1271	K_pneumoniae_3_01957
WP_002917678.1		glycerol dehydratase reactivase beta/small subunit family protein	5	5	1	1	8354	11	59		353	353	353	9645baa8bb46fe9f9ffaa8fccfada4b3_1276		7073f0826909e86605b7f24ba93c455b_1252	4d8fdf303c55f8e586b180af2243e275_1263	2900b96dbbdb35d877a57143d080ad95_1275	K_pneumoniae_3_01959
dhaT		1,3-propanediol dehydrogenase	5	5	1	1	8353	11	60		1163	1163	1163	9645baa8bb46fe9f9ffaa8fccfada4b3_1278		7073f0826909e86605b7f24ba93c455b_1254	4d8fdf303c55f8e586b180af2243e275_1265	2900b96dbbdb35d877a57143d080ad95_1277	K_pneumoniae_3_01960
WP_002917672.1		propanediol/glycerol family dehydratase medium subunit	5	5	1	1	8350	11	63		584	584	584	9645baa8bb46fe9f9ffaa8fccfada4b3_1284		7073f0826909e86605b7f24ba93c455b_1260	4d8fdf303c55f8e586b180af2243e275_1271	2900b96dbbdb35d877a57143d080ad95_1283	K_pneumoniae_3_01963
WP_002917670.1		glycerol dehydratase small subunit DhaB3	5	5	1	1	8349	11	64		425	425	425	9645baa8bb46fe9f9ffaa8fccfada4b3_1286		7073f0826909e86605b7f24ba93c455b_1262	4d8fdf303c55f8e586b180af2243e275_1273	2900b96dbbdb35d877a57143d080ad95_1285	K_pneumoniae_3_01964
WP_002917661.1		diol dehydratase reactivase subunit alpha	5	5	1	1	8348	11	65		1823	1823	1823	9645baa8bb46fe9f9ffaa8fccfada4b3_1288		7073f0826909e86605b7f24ba93c455b_1264	4d8fdf303c55f8e586b180af2243e275_1275	2900b96dbbdb35d877a57143d080ad95_1287	K_pneumoniae_3_01965
WP_002917658.1		aquaporin	5	5	1	1	8347	11	66		803	803	803	9645baa8bb46fe9f9ffaa8fccfada4b3_1290		7073f0826909e86605b7f24ba93c455b_1266	4d8fdf303c55f8e586b180af2243e275_1277	2900b96dbbdb35d877a57143d080ad95_1289	K_pneumoniae_3_01966
hdeB		acid-activated periplasmic chaperone HdeB	5	5	1	1	8346	11	67		305	305	305	9645baa8bb46fe9f9ffaa8fccfada4b3_1292		7073f0826909e86605b7f24ba93c455b_1268	4d8fdf303c55f8e586b180af2243e275_1279	2900b96dbbdb35d877a57143d080ad95_1291	K_pneumoniae_3_01967
hdeD		HdeD family acid-resistance protein	5	5	1	1	8345	11	68		575	575	575	9645baa8bb46fe9f9ffaa8fccfada4b3_1294		7073f0826909e86605b7f24ba93c455b_1270	4d8fdf303c55f8e586b180af2243e275_1281	2900b96dbbdb35d877a57143d080ad95_1293	K_pneumoniae_3_01968
WP_192906242.1		transporter substrate-binding domain-containing protein	5	5	1	1	8343	11	70		3242	3242	3242	9645baa8bb46fe9f9ffaa8fccfada4b3_1298		7073f0826909e86605b7f24ba93c455b_1274	4d8fdf303c55f8e586b180af2243e275_1285	2900b96dbbdb35d877a57143d080ad95_1297	K_pneumoniae_3_01970
evgA		acid-sensing system DNA-binding response regulator EvgA	5	5	1	1	8342	11	71		614	614	614	9645baa8bb46fe9f9ffaa8fccfada4b3_1300		7073f0826909e86605b7f24ba93c455b_1276	4d8fdf303c55f8e586b180af2243e275_1287	2900b96dbbdb35d877a57143d080ad95_1299	K_pneumoniae_3_01971
mug		G/U mismatch-specific DNA glycosylase	5	5	1	1	8494	11	74		506	506	506	9645baa8bb46fe9f9ffaa8fccfada4b3_1309		7073f0826909e86605b7f24ba93c455b_1399	4d8fdf303c55f8e586b180af2243e275_1390	2900b96dbbdb35d877a57143d080ad95_1308	K_pneumoniae_3_01975
dnaG		DNA primase	5	5	1	1	8408	247	1		1745	1745	1745	9645baa8bb46fe9f9ffaa8fccfada4b3_1313		7073f0826909e86605b7f24ba93c455b_1403	4d8fdf303c55f8e586b180af2243e275_1394	2900b96dbbdb35d877a57143d080ad95_1312	K_pneumoniae_3_01977
tsaD		tRNA (adenosine(37)-N6)-threonylcarbamoyltransferase complex transferase subunit TsaD	5	5	1	1	8568	6	81		1013	1013	1013	9645baa8bb46fe9f9ffaa8fccfada4b3_1317		7073f0826909e86605b7f24ba93c455b_1407	4d8fdf303c55f8e586b180af2243e275_1398	2900b96dbbdb35d877a57143d080ad95_1316	K_pneumoniae_3_01979
WP_004181356.1		cytosine permease	5	5	1	1	8567	6	82		1607	1607	1607	9645baa8bb46fe9f9ffaa8fccfada4b3_1319		7073f0826909e86605b7f24ba93c455b_1409	4d8fdf303c55f8e586b180af2243e275_1400	2900b96dbbdb35d877a57143d080ad95_1318	K_pneumoniae_3_01980
ureG		urease accessory protein UreG	5	5	1	1	8566	6	83		617	617	617	9645baa8bb46fe9f9ffaa8fccfada4b3_1321		7073f0826909e86605b7f24ba93c455b_1411	4d8fdf303c55f8e586b180af2243e275_1402	2900b96dbbdb35d877a57143d080ad95_1320	K_pneumoniae_3_01981
ureE		urease accessory protein UreE	5	5	1	1	8564	6	85		476	476	476	9645baa8bb46fe9f9ffaa8fccfada4b3_1325		7073f0826909e86605b7f24ba93c455b_1415	4d8fdf303c55f8e586b180af2243e275_1406	2900b96dbbdb35d877a57143d080ad95_1324	K_pneumoniae_3_01983
ureC		urease subunit alpha	5	5	1	1	8563	6	86		1703	1703	1703	9645baa8bb46fe9f9ffaa8fccfada4b3_1327		7073f0826909e86605b7f24ba93c455b_1417	4d8fdf303c55f8e586b180af2243e275_1408	2900b96dbbdb35d877a57143d080ad95_1326	K_pneumoniae_3_01984
WP_002916872.1		urease subunit beta	5	5	1	1	8562	6	87		320	320	320	9645baa8bb46fe9f9ffaa8fccfada4b3_1329		7073f0826909e86605b7f24ba93c455b_1419	4d8fdf303c55f8e586b180af2243e275_1410	2900b96dbbdb35d877a57143d080ad95_1328	K_pneumoniae_3_01985
WP_002916871.1		urease subunit gamma	5	5	1	1	8561	6	88		302	302	302	9645baa8bb46fe9f9ffaa8fccfada4b3_1331		7073f0826909e86605b7f24ba93c455b_1421	4d8fdf303c55f8e586b180af2243e275_1412	2900b96dbbdb35d877a57143d080ad95_1330	K_pneumoniae_3_01986
WP_004174349.1		urease accessory protein UreD	5	5	1	1	8560	6	89		824	824	824	9645baa8bb46fe9f9ffaa8fccfada4b3_1333		7073f0826909e86605b7f24ba93c455b_1423	4d8fdf303c55f8e586b180af2243e275_1414	2900b96dbbdb35d877a57143d080ad95_1332	K_pneumoniae_3_01987
plsY		glycerol-3-phosphate 1-O-acyltransferase PlsY	5	5	1	1	8557	6	92		617	617	617	9645baa8bb46fe9f9ffaa8fccfada4b3_1339		7073f0826909e86605b7f24ba93c455b_1429	4d8fdf303c55f8e586b180af2243e275_1420	2900b96dbbdb35d877a57143d080ad95_1338	K_pneumoniae_3_01988
folB		bifunctional dihydroneopterin aldolase/7,8-dihydroneopterin epimerase	5	5	1	1	8556	6	93		383	383	383	9645baa8bb46fe9f9ffaa8fccfada4b3_1341		7073f0826909e86605b7f24ba93c455b_1431	4d8fdf303c55f8e586b180af2243e275_1422	2900b96dbbdb35d877a57143d080ad95_1340	K_pneumoniae_3_01989
bacA		undecaprenyl-diphosphate phosphatase	5	5	1	1	8555	6	94		821	821	821	9645baa8bb46fe9f9ffaa8fccfada4b3_1343		7073f0826909e86605b7f24ba93c455b_1433	4d8fdf303c55f8e586b180af2243e275_1424	2900b96dbbdb35d877a57143d080ad95_1342	K_pneumoniae_3_01990
WP_002916864.1		multifunctional CCA addition/repair protein	5	5	1	1	8554	6	95		1241	1241	1241	9645baa8bb46fe9f9ffaa8fccfada4b3_1345		7073f0826909e86605b7f24ba93c455b_1435	4d8fdf303c55f8e586b180af2243e275_1426	2900b96dbbdb35d877a57143d080ad95_1344	K_pneumoniae_3_01991
WP_002916862.1		SH3 domain-containing protein	5	5	1	1	8553	6	96		620	620	620	9645baa8bb46fe9f9ffaa8fccfada4b3_1347		7073f0826909e86605b7f24ba93c455b_1437	4d8fdf303c55f8e586b180af2243e275_1428	2900b96dbbdb35d877a57143d080ad95_1346	K_pneumoniae_3_01992
WP_192906248.1		inorganic triphosphatase	5	5	1	1	8552	6	97		1298	1298	1298	9645baa8bb46fe9f9ffaa8fccfada4b3_1349		7073f0826909e86605b7f24ba93c455b_1439	4d8fdf303c55f8e586b180af2243e275_1430	2900b96dbbdb35d877a57143d080ad95_1348	K_pneumoniae_3_01993
glnE		bifunctional [glutamate--ammonia ligase]-adenylyl-L-tyrosine phosphorylase/[glutamate--ammonia-ligase] adenylyltransferase	5	5	1	1	8551	6	98		2837	2837	2837	9645baa8bb46fe9f9ffaa8fccfada4b3_1351		7073f0826909e86605b7f24ba93c455b_1441	4d8fdf303c55f8e586b180af2243e275_1432	2900b96dbbdb35d877a57143d080ad95_1350	K_pneumoniae_3_01994
hldE		bifunctional D-glycero-beta-D-manno-heptose-7-phosphate kinase/D-glycero-beta-D-manno-heptose 1-phosphate adenylyltransferase HldE	5	5	1	1	8550	6	99		1433	1433	1433	9645baa8bb46fe9f9ffaa8fccfada4b3_1353		7073f0826909e86605b7f24ba93c455b_1443	4d8fdf303c55f8e586b180af2243e275_1434	2900b96dbbdb35d877a57143d080ad95_1352	K_pneumoniae_3_01995
glgS		cell surface composition regulator GlgS	5	5	1	1	8548	6	101		197	197	197	9645baa8bb46fe9f9ffaa8fccfada4b3_1357		7073f0826909e86605b7f24ba93c455b_1447	4d8fdf303c55f8e586b180af2243e275_1438	2900b96dbbdb35d877a57143d080ad95_1356	K_pneumoniae_3_01996
WP_002916856.1		accessory factor UbiK family protein	5	5	1	1	8547	6	102		272	272	272	9645baa8bb46fe9f9ffaa8fccfada4b3_1359		7073f0826909e86605b7f24ba93c455b_1449	4d8fdf303c55f8e586b180af2243e275_1440	2900b96dbbdb35d877a57143d080ad95_1358	K_pneumoniae_3_01997
ribB		3,4-dihydroxy-2-butanone-4-phosphate synthase	5	5	1	1	8546	6	103		653	653	653	9645baa8bb46fe9f9ffaa8fccfada4b3_1362		7073f0826909e86605b7f24ba93c455b_1452	4d8fdf303c55f8e586b180af2243e275_1443	2900b96dbbdb35d877a57143d080ad95_1361	K_pneumoniae_3_01998
zupT		zinc transporter ZupT	5	5	1	1	8545	6	104		770	770	770	9645baa8bb46fe9f9ffaa8fccfada4b3_1364		7073f0826909e86605b7f24ba93c455b_1454	4d8fdf303c55f8e586b180af2243e275_1445	2900b96dbbdb35d877a57143d080ad95_1363	K_pneumoniae_3_01999
ygiD		4,5-DOPA dioxygenase extradiol	5	5	1	1	8544	6	105		791	791	791	9645baa8bb46fe9f9ffaa8fccfada4b3_1366		7073f0826909e86605b7f24ba93c455b_1456	4d8fdf303c55f8e586b180af2243e275_1447	2900b96dbbdb35d877a57143d080ad95_1365	K_pneumoniae_3_02000
WP_004144540.1		glutathionylspermidine synthase family protein	5	5	1	1	8543	6	106		1160	1160	1160	9645baa8bb46fe9f9ffaa8fccfada4b3_1368		7073f0826909e86605b7f24ba93c455b_1458	4d8fdf303c55f8e586b180af2243e275_1449	2900b96dbbdb35d877a57143d080ad95_1367	K_pneumoniae_3_02001
WP_002916849.1		DUF1190 family protein	5	5	1	1	8542	6	107		671	671	671	9645baa8bb46fe9f9ffaa8fccfada4b3_1370		7073f0826909e86605b7f24ba93c455b_1460	4d8fdf303c55f8e586b180af2243e275_1451	2900b96dbbdb35d877a57143d080ad95_1369	K_pneumoniae_3_02002
nudF		ADP-ribose diphosphatase	5	5	1	1	8540	6	109		632	632	632	9645baa8bb46fe9f9ffaa8fccfada4b3_1374		7073f0826909e86605b7f24ba93c455b_1464	4d8fdf303c55f8e586b180af2243e275_1455	2900b96dbbdb35d877a57143d080ad95_1373	K_pneumoniae_3_02004
WP_002916847.1		DUF1249 family protein	5	5	1	1	8539	6	110		422	422	422	9645baa8bb46fe9f9ffaa8fccfada4b3_1376		7073f0826909e86605b7f24ba93c455b_1466	4d8fdf303c55f8e586b180af2243e275_1457	2900b96dbbdb35d877a57143d080ad95_1375	K_pneumoniae_3_02005
cpdA		3',5'-cyclic-AMP phosphodiesterase	5	5	1	1	8538	6	111		827	827	827	9645baa8bb46fe9f9ffaa8fccfada4b3_1378		7073f0826909e86605b7f24ba93c455b_1468	4d8fdf303c55f8e586b180af2243e275_1459	2900b96dbbdb35d877a57143d080ad95_1377	K_pneumoniae_3_02006
yqiA		esterase YqiA	5	5	1	1	8537	6	80		575	575	575	9645baa8bb46fe9f9ffaa8fccfada4b3_1380		7073f0826909e86605b7f24ba93c455b_1470	4d8fdf303c55f8e586b180af2243e275_1461	2900b96dbbdb35d877a57143d080ad95_1379	K_pneumoniae_3_02007
parE		DNA topoisomerase IV subunit B	5	5	1	1	8536	6	79		1895	1895	1895	9645baa8bb46fe9f9ffaa8fccfada4b3_1382		7073f0826909e86605b7f24ba93c455b_1472	4d8fdf303c55f8e586b180af2243e275_1463	2900b96dbbdb35d877a57143d080ad95_1381	K_pneumoniae_3_02008
WP_002916842.1		antibiotic biosynthesis monooxygenase	5	5	1	1	8535	6	78		314	314	314	9645baa8bb46fe9f9ffaa8fccfada4b3_1384		7073f0826909e86605b7f24ba93c455b_1474	4d8fdf303c55f8e586b180af2243e275_1465	2900b96dbbdb35d877a57143d080ad95_1383	K_pneumoniae_3_02009
WP_002916840.1		NAD(P)H-dependent oxidoreductase	5	5	1	1	8534	6	77		581	581	581	9645baa8bb46fe9f9ffaa8fccfada4b3_1386		7073f0826909e86605b7f24ba93c455b_1476	4d8fdf303c55f8e586b180af2243e275_1467	2900b96dbbdb35d877a57143d080ad95_1385	K_pneumoniae_3_02010
qseC		two-component system sensor histidine kinase QseC	5	5	1	1	8533	6	76		1343	1349	1347	9645baa8bb46fe9f9ffaa8fccfada4b3_1388		7073f0826909e86605b7f24ba93c455b_1478	4d8fdf303c55f8e586b180af2243e275_1469	2900b96dbbdb35d877a57143d080ad95_1387	K_pneumoniae_3_02011
qseB		two-component system response regulator QseB	5	5	1	1	8532	6	75		659	659	659	9645baa8bb46fe9f9ffaa8fccfada4b3_1390		7073f0826909e86605b7f24ba93c455b_1480	4d8fdf303c55f8e586b180af2243e275_1471	2900b96dbbdb35d877a57143d080ad95_1389	K_pneumoniae_3_02012
WP_002916833.1		YgiW/YdeI family stress tolerance OB fold protein	5	5	1	1	8531	6	74		395	395	395	9645baa8bb46fe9f9ffaa8fccfada4b3_1392		7073f0826909e86605b7f24ba93c455b_1482	4d8fdf303c55f8e586b180af2243e275_1473	2900b96dbbdb35d877a57143d080ad95_1391	K_pneumoniae_3_02013
WP_002916831.1		AraC family transcriptional regulator	5	5	1	1	8530	6	73		869	869	869	9645baa8bb46fe9f9ffaa8fccfada4b3_1394		7073f0826909e86605b7f24ba93c455b_1484	4d8fdf303c55f8e586b180af2243e275_1475	2900b96dbbdb35d877a57143d080ad95_1393	K_pneumoniae_3_02014
parC		DNA topoisomerase IV subunit A	5	5	1	1	8529	6	72		2258	2258	2258	9645baa8bb46fe9f9ffaa8fccfada4b3_1396		7073f0826909e86605b7f24ba93c455b_1486	4d8fdf303c55f8e586b180af2243e275_1477	2900b96dbbdb35d877a57143d080ad95_1395	K_pneumoniae_3_02015
plsC		1-acylglycerol-3-phosphate O-acyltransferase	5	5	1	1	8528	6	71		737	737	737	9645baa8bb46fe9f9ffaa8fccfada4b3_1398		7073f0826909e86605b7f24ba93c455b_1488	4d8fdf303c55f8e586b180af2243e275_1479	2900b96dbbdb35d877a57143d080ad95_1397	K_pneumoniae_3_02016
ftsP		cell division protein FtsP	5	5	1	1	8527	6	70		1412	1412	1412	9645baa8bb46fe9f9ffaa8fccfada4b3_1400		7073f0826909e86605b7f24ba93c455b_1490	4d8fdf303c55f8e586b180af2243e275_1481	2900b96dbbdb35d877a57143d080ad95_1399	K_pneumoniae_3_02017
WP_004144550.1		GNAT family N-acetyltransferase	5	5	1	1	8526	6	69		527	527	527	9645baa8bb46fe9f9ffaa8fccfada4b3_1404		7073f0826909e86605b7f24ba93c455b_1494	4d8fdf303c55f8e586b180af2243e275_1485	2900b96dbbdb35d877a57143d080ad95_1403	K_pneumoniae_3_02019
dkgA		2,5-didehydrogluconate reductase DkgA	5	5	1	1	8524	6	67		827	827	827	9645baa8bb46fe9f9ffaa8fccfada4b3_1406		7073f0826909e86605b7f24ba93c455b_1496	4d8fdf303c55f8e586b180af2243e275_1487	2900b96dbbdb35d877a57143d080ad95_1405	K_pneumoniae_3_02020
yqhD		alcohol dehydrogenase	5	5	1	1	8523	6	66		1163	1163	1163	9645baa8bb46fe9f9ffaa8fccfada4b3_1408		7073f0826909e86605b7f24ba93c455b_1498	4d8fdf303c55f8e586b180af2243e275_1489	2900b96dbbdb35d877a57143d080ad95_1407	K_pneumoniae_3_02021
WP_004144552.1		AraC family transcriptional regulator	5	5	1	1	8522	6	65		899	899	899	9645baa8bb46fe9f9ffaa8fccfada4b3_1410		7073f0826909e86605b7f24ba93c455b_1500	4d8fdf303c55f8e586b180af2243e275_1491	2900b96dbbdb35d877a57143d080ad95_1409	K_pneumoniae_3_02022
WP_002916791.1		DedA family protein	5	5	1	1	8521	6	64		659	659	659	9645baa8bb46fe9f9ffaa8fccfada4b3_1412		7073f0826909e86605b7f24ba93c455b_1502	4d8fdf303c55f8e586b180af2243e275_1493	2900b96dbbdb35d877a57143d080ad95_1411	K_pneumoniae_3_02023
metC		cystathionine beta-lyase	5	5	1	1	8520	6	63		1187	1187	1187	9645baa8bb46fe9f9ffaa8fccfada4b3_1414		7073f0826909e86605b7f24ba93c455b_1504	4d8fdf303c55f8e586b180af2243e275_1495	2900b96dbbdb35d877a57143d080ad95_1413	K_pneumoniae_3_02024
exbB		tol-pal system-associated acyl-CoA thioesterase	5	5	1	1	8519	6	62		731	731	731	9645baa8bb46fe9f9ffaa8fccfada4b3_1416		7073f0826909e86605b7f24ba93c455b_1506	4d8fdf303c55f8e586b180af2243e275_1497	2900b96dbbdb35d877a57143d080ad95_1417	K_pneumoniae_3_02025
exbD		TonB system transport protein ExbD	5	5	1	1	8517	6	60		425	425	425	9645baa8bb46fe9f9ffaa8fccfada4b3_1418		7073f0826909e86605b7f24ba93c455b_1508	4d8fdf303c55f8e586b180af2243e275_1499	2900b96dbbdb35d877a57143d080ad95_1419	K_pneumoniae_3_02026
WP_004105804.1		TIGR00645 family protein	5	5	1	1	8514	6	57		494	494	494	9645baa8bb46fe9f9ffaa8fccfada4b3_1420		7073f0826909e86605b7f24ba93c455b_1514	4d8fdf303c55f8e586b180af2243e275_1505	2900b96dbbdb35d877a57143d080ad95_1425	K_pneumoniae_3_02029
WP_019704982.1		dienelactone hydrolase family protein	5	5	1	1	8513	6	56		887	887	887	9645baa8bb46fe9f9ffaa8fccfada4b3_1422		7073f0826909e86605b7f24ba93c455b_1516	4d8fdf303c55f8e586b180af2243e275_1507	2900b96dbbdb35d877a57143d080ad95_1427	K_pneumoniae_3_02030
WP_002916743.1		DUF2623 domain-containing protein	5	5	1	1	8512	6	55		287	287	287	9645baa8bb46fe9f9ffaa8fccfada4b3_1424		7073f0826909e86605b7f24ba93c455b_1518	4d8fdf303c55f8e586b180af2243e275_1509	2900b96dbbdb35d877a57143d080ad95_1429	K_pneumoniae_3_02031
yghU		glutathione-dependent disulfide-bond oxidoreductase	5	5	1	1	8511	6	54		866	866	866	9645baa8bb46fe9f9ffaa8fccfada4b3_1426		7073f0826909e86605b7f24ba93c455b_1520	4d8fdf303c55f8e586b180af2243e275_1511	2900b96dbbdb35d877a57143d080ad95_1431	K_pneumoniae_3_02032
WP_004150918.1		thioredoxin domain-containing protein	5	5	1	1	8510	6	53		560	560	560	9645baa8bb46fe9f9ffaa8fccfada4b3_1428		7073f0826909e86605b7f24ba93c455b_1522	4d8fdf303c55f8e586b180af2243e275_1513	2900b96dbbdb35d877a57143d080ad95_1433	K_pneumoniae_3_02033
gss		bifunctional glutathionylspermidine amidase/synthase	5	5	1	1	8508	6	51		1865	1865	1865	9645baa8bb46fe9f9ffaa8fccfada4b3_1432		7073f0826909e86605b7f24ba93c455b_1526	4d8fdf303c55f8e586b180af2243e275_1517	2900b96dbbdb35d877a57143d080ad95_1437	K_pneumoniae_3_02034
WP_004149825.1		PLP-dependent aminotransferase family protein	5	5	1	1	8507	6	50		1181	1181	1181	9645baa8bb46fe9f9ffaa8fccfada4b3_1434		7073f0826909e86605b7f24ba93c455b_1528	4d8fdf303c55f8e586b180af2243e275_1519	2900b96dbbdb35d877a57143d080ad95_1439	K_pneumoniae_3_02035
WP_002916738.1		hypothetical protein	5	5	1	1	8506	6	49		188	188	188	9645baa8bb46fe9f9ffaa8fccfada4b3_1436		7073f0826909e86605b7f24ba93c455b_1530	4d8fdf303c55f8e586b180af2243e275_1521	2900b96dbbdb35d877a57143d080ad95_1441	K_pneumoniae_3_02037
WP_004174410.1		short chain dehydrogenase	5	5	1	1	8504	6	47		602	602	602	9645baa8bb46fe9f9ffaa8fccfada4b3_1440		7073f0826909e86605b7f24ba93c455b_1534	4d8fdf303c55f8e586b180af2243e275_1525	2900b96dbbdb35d877a57143d080ad95_1445	K_pneumoniae_3_02039
WP_004181308.1		LysR family transcriptional regulator	5	5	1	1	8503	6	46		911	911	911	9645baa8bb46fe9f9ffaa8fccfada4b3_1442		7073f0826909e86605b7f24ba93c455b_1536	4d8fdf303c55f8e586b180af2243e275_1527	2900b96dbbdb35d877a57143d080ad95_1447	K_pneumoniae_3_02040
metC_2		PLP-dependent aspartate aminotransferase family protein	5	5	1	1	8502	6	45		1148	1148	1148	9645baa8bb46fe9f9ffaa8fccfada4b3_1444		7073f0826909e86605b7f24ba93c455b_1538	4d8fdf303c55f8e586b180af2243e275_1529	2900b96dbbdb35d877a57143d080ad95_1449	K_pneumoniae_3_02041
WP_074183192.1		cystathionine beta-synthase	5	5	1	1	8501	6	44		1376	1376	1376	9645baa8bb46fe9f9ffaa8fccfada4b3_1446		7073f0826909e86605b7f24ba93c455b_1540	4d8fdf303c55f8e586b180af2243e275_1531	2900b96dbbdb35d877a57143d080ad95_1451	K_pneumoniae_3_02042
WP_002916694.1		DUF554 domain-containing protein	5	5	1	1	9811	6	39		713	713	713	9645baa8bb46fe9f9ffaa8fccfada4b3_1451		7073f0826909e86605b7f24ba93c455b_1565	4d8fdf303c55f8e586b180af2243e275_1544	2900b96dbbdb35d877a57143d080ad95_1456	K_pneumoniae_3_02048
WP_009484134.1		ornithine decarboxylase	5	5	1	1	9812	6	36		2138	2138	2138	9645baa8bb46fe9f9ffaa8fccfada4b3_1453		7073f0826909e86605b7f24ba93c455b_1567	4d8fdf303c55f8e586b180af2243e275_1546	2900b96dbbdb35d877a57143d080ad95_1458	K_pneumoniae_3_02049
WP_004144787.1		nucleoside permease	5	5	1	1	9813	6	35		1253	1253	1253	9645baa8bb46fe9f9ffaa8fccfada4b3_1455		7073f0826909e86605b7f24ba93c455b_1569	4d8fdf303c55f8e586b180af2243e275_1548	2900b96dbbdb35d877a57143d080ad95_1460	K_pneumoniae_3_02050
WP_004105744.1		oxidative damage protection protein	5	5	1	1	9815	6	33		275	275	275	9645baa8bb46fe9f9ffaa8fccfada4b3_1459		7073f0826909e86605b7f24ba93c455b_1573	4d8fdf303c55f8e586b180af2243e275_1552	2900b96dbbdb35d877a57143d080ad95_1464	K_pneumoniae_3_02052
mutY		A/G-specific adenine glycosylase	5	5	1	1	9816	6	32		1058	1058	1058	9645baa8bb46fe9f9ffaa8fccfada4b3_1461		7073f0826909e86605b7f24ba93c455b_1575	4d8fdf303c55f8e586b180af2243e275_1554	2900b96dbbdb35d877a57143d080ad95_1466	K_pneumoniae_3_02053
trmB		tRNA (guanosine(46)-N7)-methyltransferase TrmB	5	5	1	1	9817	6	31		719	719	719	9645baa8bb46fe9f9ffaa8fccfada4b3_1463		7073f0826909e86605b7f24ba93c455b_1577	4d8fdf303c55f8e586b180af2243e275_1556	2900b96dbbdb35d877a57143d080ad95_1468	K_pneumoniae_3_02054
WP_002916620.1		YggL family protein	5	5	1	1	9818	6	30		326	326	326	9645baa8bb46fe9f9ffaa8fccfada4b3_1465		7073f0826909e86605b7f24ba93c455b_1579	4d8fdf303c55f8e586b180af2243e275_1558	2900b96dbbdb35d877a57143d080ad95_1470	K_pneumoniae_3_02055
WP_019704316.1		DUF2884 domain-containing protein	5	5	1	1	9819	6	29		716	719	718	9645baa8bb46fe9f9ffaa8fccfada4b3_1467		7073f0826909e86605b7f24ba93c455b_1581	4d8fdf303c55f8e586b180af2243e275_1560	2900b96dbbdb35d877a57143d080ad95_1472	K_pneumoniae_3_02056
WP_002916615.1		XTP/dITP diphosphatase	5	5	1	1	9824	6	23		593	593	593	9645baa8bb46fe9f9ffaa8fccfada4b3_1477		7073f0826909e86605b7f24ba93c455b_1585	4d8fdf303c55f8e586b180af2243e275_1570	2900b96dbbdb35d877a57143d080ad95_1482	K_pneumoniae_3_02061
yggU		DUF167 family protein YggU	5	5	1	1	9825	6	22		290	290	290	9645baa8bb46fe9f9ffaa8fccfada4b3_1479		7073f0826909e86605b7f24ba93c455b_1587	4d8fdf303c55f8e586b180af2243e275_1572	2900b96dbbdb35d877a57143d080ad95_1484	K_pneumoniae_3_02062
WP_002916613.1		YggT family protein	5	5	1	1	9826	6	21		566	566	566	9645baa8bb46fe9f9ffaa8fccfada4b3_1481		7073f0826909e86605b7f24ba93c455b_1589	4d8fdf303c55f8e586b180af2243e275_1574	2900b96dbbdb35d877a57143d080ad95_1486	K_pneumoniae_3_02063
WP_004144780.1		YggS family pyridoxal phosphate-dependent enzyme	5	5	1	1	9827	6	20		701	701	701	9645baa8bb46fe9f9ffaa8fccfada4b3_1483		7073f0826909e86605b7f24ba93c455b_1591	4d8fdf303c55f8e586b180af2243e275_1576	2900b96dbbdb35d877a57143d080ad95_1488	K_pneumoniae_3_02064
WP_004149811.1		type IV pilus twitching motility protein PilT	5	5	1	1	9828	6	19		980	980	980	9645baa8bb46fe9f9ffaa8fccfada4b3_1485		7073f0826909e86605b7f24ba93c455b_1593	4d8fdf303c55f8e586b180af2243e275_1578	2900b96dbbdb35d877a57143d080ad95_1490	K_pneumoniae_3_02065
csgD		transcriptional regulator CsgD	5	5	1	1	9829	6	18		653	653	653	9645baa8bb46fe9f9ffaa8fccfada4b3_1487		7073f0826909e86605b7f24ba93c455b_1595	4d8fdf303c55f8e586b180af2243e275_1580	2900b96dbbdb35d877a57143d080ad95_1492	K_pneumoniae_3_02066
ruvX		Holliday junction resolvase RuvX	5	5	1	1	9830	6	17		416	416	416	9645baa8bb46fe9f9ffaa8fccfada4b3_1489		7073f0826909e86605b7f24ba93c455b_1597	4d8fdf303c55f8e586b180af2243e275_1582	2900b96dbbdb35d877a57143d080ad95_1494	K_pneumoniae_3_02067
WP_002916603.1		YqgE/AlgH family protein	5	5	1	1	9831	6	16		563	563	563	9645baa8bb46fe9f9ffaa8fccfada4b3_1491		7073f0826909e86605b7f24ba93c455b_1599	4d8fdf303c55f8e586b180af2243e275_1584	2900b96dbbdb35d877a57143d080ad95_1496	K_pneumoniae_3_02068
gshB		glutathione synthase	5	5	1	1	9832	6	15		950	950	950	9645baa8bb46fe9f9ffaa8fccfada4b3_1493		7073f0826909e86605b7f24ba93c455b_1601	4d8fdf303c55f8e586b180af2243e275_1586	2900b96dbbdb35d877a57143d080ad95_1498	K_pneumoniae_3_02069
rsmE		16S rRNA (uracil(1498)-N(3))-methyltransferase	5	5	1	1	9833	6	14		731	731	731	9645baa8bb46fe9f9ffaa8fccfada4b3_1495		7073f0826909e86605b7f24ba93c455b_1603	4d8fdf303c55f8e586b180af2243e275_1588	2900b96dbbdb35d877a57143d080ad95_1500	K_pneumoniae_3_02070
endA		deoxyribonuclease I	5	5	1	1	9834	6	13		707	707	707	9645baa8bb46fe9f9ffaa8fccfada4b3_1497		7073f0826909e86605b7f24ba93c455b_1605	4d8fdf303c55f8e586b180af2243e275_1590	2900b96dbbdb35d877a57143d080ad95_1502	K_pneumoniae_3_02071
WP_002916587.1		sugar porter family MFS transporter	5	5	1	1	9836	6	11		1394	1394	1394	9645baa8bb46fe9f9ffaa8fccfada4b3_1501		7073f0826909e86605b7f24ba93c455b_1609	4d8fdf303c55f8e586b180af2243e275_1594	2900b96dbbdb35d877a57143d080ad95_1506	K_pneumoniae_3_02073
WP_004151780.1		M48 family metallopeptidase	5	5	1	1	9778	105	3		758	758	758	9645baa8bb46fe9f9ffaa8fccfada4b3_1545		7073f0826909e86605b7f24ba93c455b_1651	4d8fdf303c55f8e586b180af2243e275_1636	2900b96dbbdb35d877a57143d080ad95_1522	K_pneumoniae_3_02077
epd		erythrose-4-phosphate dehydrogenase	5	5	1	1	9780	246	1		1028	1028	1028	9645baa8bb46fe9f9ffaa8fccfada4b3_1549		7073f0826909e86605b7f24ba93c455b_1655	4d8fdf303c55f8e586b180af2243e275_1640	2900b96dbbdb35d877a57143d080ad95_1526	K_pneumoniae_3_02079
fbaA		class II fructose-bisphosphate aldolase	5	5	1	1	10803	165	1		1079	1079	1079	9645baa8bb46fe9f9ffaa8fccfada4b3_1553		7073f0826909e86605b7f24ba93c455b_1659	4d8fdf303c55f8e586b180af2243e275_1644	2900b96dbbdb35d877a57143d080ad95_1530	K_pneumoniae_3_02081
WP_002916504.1		small-conductance mechanosensitive channel MscS	5	5	1	1	10804	165	2		857	857	857	9645baa8bb46fe9f9ffaa8fccfada4b3_1555		7073f0826909e86605b7f24ba93c455b_1661	4d8fdf303c55f8e586b180af2243e275_1646	2900b96dbbdb35d877a57143d080ad95_1532	K_pneumoniae_3_02082
argO		arginine exporter ArgO	5	5	1	1	10805	165	4		635	635	635	9645baa8bb46fe9f9ffaa8fccfada4b3_1557		7073f0826909e86605b7f24ba93c455b_1663	4d8fdf303c55f8e586b180af2243e275_1648	2900b96dbbdb35d877a57143d080ad95_1534	K_pneumoniae_3_02083
WP_002916499.1		oxidative stress defense protein	5	5	1	1	10806	165	3		767	767	767	9645baa8bb46fe9f9ffaa8fccfada4b3_1559		7073f0826909e86605b7f24ba93c455b_1665	4d8fdf303c55f8e586b180af2243e275_1650	2900b96dbbdb35d877a57143d080ad95_1536	K_pneumoniae_3_02084
serA		phosphoglycerate dehydrogenase	5	5	1	1	10828	1	972		1232	1232	1232	9645baa8bb46fe9f9ffaa8fccfada4b3_1565		7073f0826909e86605b7f24ba93c455b_1671	4d8fdf303c55f8e586b180af2243e275_1656	2900b96dbbdb35d877a57143d080ad95_1542	K_pneumoniae_3_02087
WP_004144746.1		5-formyltetrahydrofolate cyclo-ligase	5	5	1	1	10827	1	973		596	596	596	9645baa8bb46fe9f9ffaa8fccfada4b3_1567		7073f0826909e86605b7f24ba93c455b_1673	4d8fdf303c55f8e586b180af2243e275_1658	2900b96dbbdb35d877a57143d080ad95_1544	K_pneumoniae_3_02088
zapA		cell division protein ZapA	5	5	1	1	10826	1	974		329	329	329	9645baa8bb46fe9f9ffaa8fccfada4b3_1572		7073f0826909e86605b7f24ba93c455b_1678	4d8fdf303c55f8e586b180af2243e275_1663	2900b96dbbdb35d877a57143d080ad95_1549	K_pneumoniae_3_02089
pepP		Xaa-Pro aminopeptidase	5	5	1	1	10824	1	976		1316	1316	1316	9645baa8bb46fe9f9ffaa8fccfada4b3_1576		7073f0826909e86605b7f24ba93c455b_1682	4d8fdf303c55f8e586b180af2243e275_1667	2900b96dbbdb35d877a57143d080ad95_1553	K_pneumoniae_3_02091
ubiH		2-octaprenyl-6-methoxyphenyl hydroxylase	5	5	1	1	10823	1	977		1178	1178	1178	9645baa8bb46fe9f9ffaa8fccfada4b3_1578		7073f0826909e86605b7f24ba93c455b_1684	4d8fdf303c55f8e586b180af2243e275_1669	2900b96dbbdb35d877a57143d080ad95_1555	K_pneumoniae_3_02092
ubiI		FAD-dependent 2-octaprenylphenol hydroxylase	5	5	1	1	10822	1	978		1202	1202	1202	9645baa8bb46fe9f9ffaa8fccfada4b3_1580		7073f0826909e86605b7f24ba93c455b_1686	4d8fdf303c55f8e586b180af2243e275_1671	2900b96dbbdb35d877a57143d080ad95_1557	K_pneumoniae_3_02093
gcvT		glycine cleavage system aminomethyltransferase GcvT	5	5	1	1	10821	1	979		1094	1094	1094	9645baa8bb46fe9f9ffaa8fccfada4b3_1582		7073f0826909e86605b7f24ba93c455b_1688	4d8fdf303c55f8e586b180af2243e275_1673	2900b96dbbdb35d877a57143d080ad95_1559	K_pneumoniae_3_02094
gcvH		glycine cleavage system protein GcvH	5	5	1	1	10820	1	980		389	389	389	9645baa8bb46fe9f9ffaa8fccfada4b3_1584		7073f0826909e86605b7f24ba93c455b_1690	4d8fdf303c55f8e586b180af2243e275_1675	2900b96dbbdb35d877a57143d080ad95_1561	K_pneumoniae_3_02095
gcvP		aminomethyl-transferring glycine dehydrogenase	5	5	1	1	10819	1	981		2873	2873	2873	9645baa8bb46fe9f9ffaa8fccfada4b3_1586		7073f0826909e86605b7f24ba93c455b_1692	4d8fdf303c55f8e586b180af2243e275_1677	2900b96dbbdb35d877a57143d080ad95_1563	K_pneumoniae_3_02096
WP_004174442.1		SDR family oxidoreductase	5	5	1	1	10818	1	982		743	743	743	9645baa8bb46fe9f9ffaa8fccfada4b3_1588		7073f0826909e86605b7f24ba93c455b_1694	4d8fdf303c55f8e586b180af2243e275_1679	2900b96dbbdb35d877a57143d080ad95_1565	K_pneumoniae_3_02097
WP_009308617.1		thioredoxin domain-containing protein	5	5	1	1	10914	1	1000		611	611	611	9645baa8bb46fe9f9ffaa8fccfada4b3_1595		7073f0826909e86605b7f24ba93c455b_1701	4d8fdf303c55f8e586b180af2243e275_1683	2900b96dbbdb35d877a57143d080ad95_1569	K_pneumoniae_3_02099
cusF		cation efflux system protein CusF	5	5	1	1	2762	4	69		344	347	344	9645baa8bb46fe9f9ffaa8fccfada4b3_8784		7073f0826909e86605b7f24ba93c455b_9050	4d8fdf303c55f8e586b180af2243e275_9270	2900b96dbbdb35d877a57143d080ad95_9415	K_pneumoniae_3_04454
WP_023284287.1		thioredoxin family protein	5	5	1	1	10915	1	1001		2009	2009	2009	9645baa8bb46fe9f9ffaa8fccfada4b3_1597		7073f0826909e86605b7f24ba93c455b_1703	4d8fdf303c55f8e586b180af2243e275_1685	2900b96dbbdb35d877a57143d080ad95_1571	K_pneumoniae_3_02100
WP_032420566.1		hypothetical protein	5	5	1	1	10916	1	1002		359	359	359	9645baa8bb46fe9f9ffaa8fccfada4b3_1599		7073f0826909e86605b7f24ba93c455b_1705	4d8fdf303c55f8e586b180af2243e275_1687	2900b96dbbdb35d877a57143d080ad95_1573	K_pneumoniae_3_02101
bglA		6-phospho-beta-glucosidase BglA	5	5	1	1	10917	1	1003		1433	1433	1433	9645baa8bb46fe9f9ffaa8fccfada4b3_1601		7073f0826909e86605b7f24ba93c455b_1707	4d8fdf303c55f8e586b180af2243e275_1689	2900b96dbbdb35d877a57143d080ad95_1575	K_pneumoniae_3_02102
WP_002916321.1		MurR/RpiR family transcriptional regulator	5	5	1	1	10918	1	1004		728	728	728	9645baa8bb46fe9f9ffaa8fccfada4b3_1603		7073f0826909e86605b7f24ba93c455b_1709	4d8fdf303c55f8e586b180af2243e275_1691	2900b96dbbdb35d877a57143d080ad95_1577	K_pneumoniae_3_02103
yqfB		N(4)-acetylcytidine aminohydrolase	5	5	1	1	10919	1	1005		311	311	311	9645baa8bb46fe9f9ffaa8fccfada4b3_1605		7073f0826909e86605b7f24ba93c455b_1711	4d8fdf303c55f8e586b180af2243e275_1693	2900b96dbbdb35d877a57143d080ad95_1579	K_pneumoniae_3_02104
WP_002916317.1		hemolysin III family protein	5	5	1	1	10920	1	1006		659	659	659	9645baa8bb46fe9f9ffaa8fccfada4b3_1607		7073f0826909e86605b7f24ba93c455b_1713	4d8fdf303c55f8e586b180af2243e275_1695	2900b96dbbdb35d877a57143d080ad95_1581	K_pneumoniae_3_02105
ygfZ		tRNA-modifying protein YgfZ	5	5	1	1	10921	1	1007		983	983	983	9645baa8bb46fe9f9ffaa8fccfada4b3_1609		7073f0826909e86605b7f24ba93c455b_1715	4d8fdf303c55f8e586b180af2243e275_1697	2900b96dbbdb35d877a57143d080ad95_1583	K_pneumoniae_3_02106
sdhE		FAD assembly factor SdhE	5	5	1	1	10922	1	1008		266	266	266	9645baa8bb46fe9f9ffaa8fccfada4b3_1611		7073f0826909e86605b7f24ba93c455b_1717	4d8fdf303c55f8e586b180af2243e275_1699	2900b96dbbdb35d877a57143d080ad95_1585	K_pneumoniae_3_02107
WP_002916310.1		protein YgfX	5	5	1	1	10923	1	1009		410	410	410	9645baa8bb46fe9f9ffaa8fccfada4b3_1613		7073f0826909e86605b7f24ba93c455b_1719	4d8fdf303c55f8e586b180af2243e275_1701	2900b96dbbdb35d877a57143d080ad95_1587	K_pneumoniae_3_02108
fldB		flavodoxin FldB	5	5	1	1	10924	1	1010		521	521	521	9645baa8bb46fe9f9ffaa8fccfada4b3_1615		7073f0826909e86605b7f24ba93c455b_1721	4d8fdf303c55f8e586b180af2243e275_1703	2900b96dbbdb35d877a57143d080ad95_1589	K_pneumoniae_3_02109
xerD		site-specific tyrosine recombinase XerD	5	5	1	1	10925	1	1011		896	896	896	9645baa8bb46fe9f9ffaa8fccfada4b3_1617		7073f0826909e86605b7f24ba93c455b_1723	4d8fdf303c55f8e586b180af2243e275_1705	2900b96dbbdb35d877a57143d080ad95_1591	K_pneumoniae_3_02110
dsbC		bifunctional protein-disulfide isomerase/oxidoreductase DsbC	5	5	1	1	10926	1	1012		713	713	713	9645baa8bb46fe9f9ffaa8fccfada4b3_1619		7073f0826909e86605b7f24ba93c455b_1725	4d8fdf303c55f8e586b180af2243e275_1707	2900b96dbbdb35d877a57143d080ad95_1593	K_pneumoniae_3_02111
recJ		single-stranded-DNA-specific exonuclease RecJ	5	5	1	1	10927	1	1013		1733	1733	1733	9645baa8bb46fe9f9ffaa8fccfada4b3_1621		7073f0826909e86605b7f24ba93c455b_1727	4d8fdf303c55f8e586b180af2243e275_1709	2900b96dbbdb35d877a57143d080ad95_1595	K_pneumoniae_3_02112
group_1593	lysS	lysine--tRNA ligase	5	5	1	1	10911	1	3074		1517	1517	1517	9645baa8bb46fe9f9ffaa8fccfada4b3_1626		7073f0826909e86605b7f24ba93c455b_1732	4d8fdf303c55f8e586b180af2243e275_1714	2900b96dbbdb35d877a57143d080ad95_1600	K_pneumoniae_3_02114
idi		isopentenyl-diphosphate Delta-isomerase	5	5	1	1	10910	1	3079		554	554	554	9645baa8bb46fe9f9ffaa8fccfada4b3_1628		7073f0826909e86605b7f24ba93c455b_1734	4d8fdf303c55f8e586b180af2243e275_1716	2900b96dbbdb35d877a57143d080ad95_1602	K_pneumoniae_3_02115
WP_004157874.1		peptidoglycan DD-metalloendopeptidase family protein	5	5	1	1	10909	1	3080		713	713	713	9645baa8bb46fe9f9ffaa8fccfada4b3_1630		7073f0826909e86605b7f24ba93c455b_1744	4d8fdf303c55f8e586b180af2243e275_1718	2900b96dbbdb35d877a57143d080ad95_1604	K_pneumoniae_3_02116
WP_015958948.1		LysR family transcriptional regulator	5	5	1	1	10907	1	3082		929	929	929	9645baa8bb46fe9f9ffaa8fccfada4b3_1637		7073f0826909e86605b7f24ba93c455b_1751	4d8fdf303c55f8e586b180af2243e275_1755	2900b96dbbdb35d877a57143d080ad95_1611	K_pneumoniae_3_02119
WP_004889869.1		carboxymuconolactone decarboxylase family protein	5	5	1	1	10902	1	3083		803	803	803	9645baa8bb46fe9f9ffaa8fccfada4b3_1639		7073f0826909e86605b7f24ba93c455b_1753	4d8fdf303c55f8e586b180af2243e275_1759	2900b96dbbdb35d877a57143d080ad95_1613	K_pneumoniae_3_02120
WP_004174492.1		NAD(P)H-dependent oxidoreductase	5	5	1	1	10900	1	3057		557	557	557	9645baa8bb46fe9f9ffaa8fccfada4b3_1643		7073f0826909e86605b7f24ba93c455b_1757	4d8fdf303c55f8e586b180af2243e275_1763	2900b96dbbdb35d877a57143d080ad95_1617	K_pneumoniae_3_02122
WP_008804092.1		polysaccharide export protein	5	5	1	1	5301	78	49		1133	1136	1135	9645baa8bb46fe9f9ffaa8fccfada4b3_3267		7073f0826909e86605b7f24ba93c455b_3336	4d8fdf303c55f8e586b180af2243e275_3438	2900b96dbbdb35d877a57143d080ad95_3333	K_pneumoniae_3_01347
WP_004151785.1		superoxide dismutase	5	5	1	1	10899	1	3056		308	308	308	9645baa8bb46fe9f9ffaa8fccfada4b3_1645		7073f0826909e86605b7f24ba93c455b_1759	4d8fdf303c55f8e586b180af2243e275_1765	2900b96dbbdb35d877a57143d080ad95_1619	K_pneumoniae_3_02123
WP_004174493.1		LysR family transcriptional regulator	5	5	1	1	10898	1	3055		899	899	899	9645baa8bb46fe9f9ffaa8fccfada4b3_1647		7073f0826909e86605b7f24ba93c455b_1761	4d8fdf303c55f8e586b180af2243e275_1767	2900b96dbbdb35d877a57143d080ad95_1621	K_pneumoniae_3_02124
WP_002916283.1		DUF1349 domain-containing protein	5	5	1	1	10896	1	3053		572	572	572	9645baa8bb46fe9f9ffaa8fccfada4b3_1651		7073f0826909e86605b7f24ba93c455b_1765	4d8fdf303c55f8e586b180af2243e275_1771	2900b96dbbdb35d877a57143d080ad95_1625	K_pneumoniae_3_02126
WP_002916281.1		metalloregulator ArsR/SmtB family transcription factor	5	5	1	1	10894	1	3051		329	329	329	9645baa8bb46fe9f9ffaa8fccfada4b3_1655		7073f0826909e86605b7f24ba93c455b_1769	4d8fdf303c55f8e586b180af2243e275_1775	2900b96dbbdb35d877a57143d080ad95_1629	K_pneumoniae_3_02128
WP_004185525.1		arsenic transporter	5	5	1	1	10893	1	3050		1292	1292	1292	9645baa8bb46fe9f9ffaa8fccfada4b3_1657		7073f0826909e86605b7f24ba93c455b_1771	4d8fdf303c55f8e586b180af2243e275_1777	2900b96dbbdb35d877a57143d080ad95_1631	K_pneumoniae_3_02129
group_1606	arsC	glutaredoxin-dependent arsenate reductase	5	5	1	1	10892	1	3049		422	422	422	9645baa8bb46fe9f9ffaa8fccfada4b3_1659		7073f0826909e86605b7f24ba93c455b_1773	4d8fdf303c55f8e586b180af2243e275_1779	2900b96dbbdb35d877a57143d080ad95_1633	K_pneumoniae_3_02130
WP_002916277.1		peptide MFS transporter	5	5	1	1	10891	1	3048		1553	1553	1553	9645baa8bb46fe9f9ffaa8fccfada4b3_1661		7073f0826909e86605b7f24ba93c455b_1775	4d8fdf303c55f8e586b180af2243e275_1781	2900b96dbbdb35d877a57143d080ad95_1635	K_pneumoniae_3_02131
WP_002916274.1		DUF1889 family protein	5	5	1	1	10890	1	3047		299	299	299	9645baa8bb46fe9f9ffaa8fccfada4b3_1663		7073f0826909e86605b7f24ba93c455b_1777	4d8fdf303c55f8e586b180af2243e275_1783	2900b96dbbdb35d877a57143d080ad95_1637	K_pneumoniae_3_02132
WP_002916272.1		MdtP family multidrug efflux transporter outer membrane subunit	5	5	1	1	10889	1	3046		1448	1448	1448	9645baa8bb46fe9f9ffaa8fccfada4b3_1665		7073f0826909e86605b7f24ba93c455b_1779	4d8fdf303c55f8e586b180af2243e275_1785	2900b96dbbdb35d877a57143d080ad95_1639	K_pneumoniae_3_02133
mdtO		multidrug efflux transporter permease subunit MdtO	5	5	1	1	10888	1	3045		1937	1937	1937	9645baa8bb46fe9f9ffaa8fccfada4b3_1667		7073f0826909e86605b7f24ba93c455b_1781	4d8fdf303c55f8e586b180af2243e275_1787	2900b96dbbdb35d877a57143d080ad95_1641	K_pneumoniae_3_02134
mdtN		multidrug transporter subunit MdtN	5	5	1	1	10887	1	3044		1025	1025	1025	9645baa8bb46fe9f9ffaa8fccfada4b3_1669		7073f0826909e86605b7f24ba93c455b_1783	4d8fdf303c55f8e586b180af2243e275_1789	2900b96dbbdb35d877a57143d080ad95_1643	K_pneumoniae_3_02135
WP_002916204.1		hypothetical protein	5	5	1	1	10886	1	3043		272	272	272	9645baa8bb46fe9f9ffaa8fccfada4b3_1671		7073f0826909e86605b7f24ba93c455b_1785	4d8fdf303c55f8e586b180af2243e275_1791	2900b96dbbdb35d877a57143d080ad95_1645	K_pneumoniae_3_02136
WP_002916202.1		(4Fe-4S)-binding protein	5	5	1	1	10885	1	3042		230	230	230	9645baa8bb46fe9f9ffaa8fccfada4b3_1673		7073f0826909e86605b7f24ba93c455b_1787	4d8fdf303c55f8e586b180af2243e275_1793	2900b96dbbdb35d877a57143d080ad95_1647	K_pneumoniae_3_02137
WP_002916201.1		GNAT family N-acetyltransferase	5	5	1	1	10884	1	3041		272	272	272	9645baa8bb46fe9f9ffaa8fccfada4b3_1675		7073f0826909e86605b7f24ba93c455b_1789	4d8fdf303c55f8e586b180af2243e275_1795	2900b96dbbdb35d877a57143d080ad95_1649	K_pneumoniae_3_02138
WP_239593492.1		EAL domain-containing protein	5	5	1	1	10883	1	3040		1412	1412	1412	9645baa8bb46fe9f9ffaa8fccfada4b3_1677		7073f0826909e86605b7f24ba93c455b_1791	4d8fdf303c55f8e586b180af2243e275_1797	2900b96dbbdb35d877a57143d080ad95_1651	K_pneumoniae_3_02139
WP_004185520.1		type 1 fimbrial protein	5	5	1	1	10880	1	3037		527	527	527	9645baa8bb46fe9f9ffaa8fccfada4b3_1683		7073f0826909e86605b7f24ba93c455b_1797	4d8fdf303c55f8e586b180af2243e275_1803	2900b96dbbdb35d877a57143d080ad95_1657	K_pneumoniae_3_02142
WP_009308599.1		fimbrial biogenesis usher protein	5	5	1	1	10879	1	3036		2612	2612	2612	9645baa8bb46fe9f9ffaa8fccfada4b3_1685		7073f0826909e86605b7f24ba93c455b_1799	4d8fdf303c55f8e586b180af2243e275_1805	2900b96dbbdb35d877a57143d080ad95_1659	K_pneumoniae_3_02143
WP_004174507.1		type 1 fimbrial protein	5	5	1	1	10877	1	3034		536	536	536	9645baa8bb46fe9f9ffaa8fccfada4b3_1689		7073f0826909e86605b7f24ba93c455b_1803	4d8fdf303c55f8e586b180af2243e275_1809	2900b96dbbdb35d877a57143d080ad95_1663	K_pneumoniae_3_02145
fimA		type 1 fimbrial major subunit FimA	5	5	1	1	10876	1	3033		548	548	548	9645baa8bb46fe9f9ffaa8fccfada4b3_1691		7073f0826909e86605b7f24ba93c455b_1805	4d8fdf303c55f8e586b180af2243e275_1811	2900b96dbbdb35d877a57143d080ad95_1665	K_pneumoniae_3_02146
fimE		type 1 fimbria switch DNA invertase FimE	5	5	1	1	10875	1	3032		608	608	608	9645baa8bb46fe9f9ffaa8fccfada4b3_1693		7073f0826909e86605b7f24ba93c455b_1807	4d8fdf303c55f8e586b180af2243e275_1813	2900b96dbbdb35d877a57143d080ad95_1667	K_pneumoniae_3_02147
WP_021440688.1		nickel/cobalt transporter	5	5	1	1	10873	5	1		956	956	956	9645baa8bb46fe9f9ffaa8fccfada4b3_1697		7073f0826909e86605b7f24ba93c455b_1811	4d8fdf303c55f8e586b180af2243e275_1821	2900b96dbbdb35d877a57143d080ad95_1671	K_pneumoniae_3_02149
WP_002916184.1		MarR family transcriptional regulator	5	5	1	1	10872	5	2		506	506	506	9645baa8bb46fe9f9ffaa8fccfada4b3_1699		7073f0826909e86605b7f24ba93c455b_1813	4d8fdf303c55f8e586b180af2243e275_1823	2900b96dbbdb35d877a57143d080ad95_1673	K_pneumoniae_3_02150
WP_004185514.1		DMT family transporter	5	5	1	1	10871	5	3		887	896	894	9645baa8bb46fe9f9ffaa8fccfada4b3_1701		7073f0826909e86605b7f24ba93c455b_1815	4d8fdf303c55f8e586b180af2243e275_1825	2900b96dbbdb35d877a57143d080ad95_1675	K_pneumoniae_3_02151
WP_002916131.1		DUF1471 domain-containing protein	5	5	1	1	10870	5	4		209	209	209	9645baa8bb46fe9f9ffaa8fccfada4b3_1703		7073f0826909e86605b7f24ba93c455b_1817	4d8fdf303c55f8e586b180af2243e275_1827	2900b96dbbdb35d877a57143d080ad95_1677	K_pneumoniae_3_02152
mrkA		type 3 fimbria major subunit MrkA	5	5	1	1	10869	5	5		608	608	608	9645baa8bb46fe9f9ffaa8fccfada4b3_1705		7073f0826909e86605b7f24ba93c455b_1819	4d8fdf303c55f8e586b180af2243e275_1829	2900b96dbbdb35d877a57143d080ad95_1679	K_pneumoniae_3_02153
mrkB		type 3 fimbria chaperone MrkB	5	5	1	1	10868	5	6		701	701	701	9645baa8bb46fe9f9ffaa8fccfada4b3_1707		7073f0826909e86605b7f24ba93c455b_1821	4d8fdf303c55f8e586b180af2243e275_1831	2900b96dbbdb35d877a57143d080ad95_1681	K_pneumoniae_3_02154
mrkD		type 3 fimbria adhesin subunit MrkD	5	5	1	1	11017	5	8		995	995	995	9645baa8bb46fe9f9ffaa8fccfada4b3_1711		7073f0826909e86605b7f24ba93c455b_1825	4d8fdf303c55f8e586b180af2243e275_1835	2900b96dbbdb35d877a57143d080ad95_1685	K_pneumoniae_3_02156
mrkF		type 3 fimbria minor subunit MrkF	5	5	1	1	11018	5	9		635	635	635	9645baa8bb46fe9f9ffaa8fccfada4b3_1713		7073f0826909e86605b7f24ba93c455b_1827	4d8fdf303c55f8e586b180af2243e275_1837	2900b96dbbdb35d877a57143d080ad95_1687	K_pneumoniae_3_02157
WP_021440944.1		MFS transporter	5	5	1	1	6688	98	11		1292	1337	1328	9645baa8bb46fe9f9ffaa8fccfada4b3_25		7073f0826909e86605b7f24ba93c455b_25	4d8fdf303c55f8e586b180af2243e275_25	2900b96dbbdb35d877a57143d080ad95_25	K_pneumoniae_3_02338
mkrJ		phosphodiesterase MrkJ	5	5	1	1	11019	5	10		716	716	716	9645baa8bb46fe9f9ffaa8fccfada4b3_1715		7073f0826909e86605b7f24ba93c455b_1829	4d8fdf303c55f8e586b180af2243e275_1839	2900b96dbbdb35d877a57143d080ad95_1689	K_pneumoniae_3_02158
mrkI		transcriptional regulator MrkI	5	5	1	1	11020	5	11		572	572	572	9645baa8bb46fe9f9ffaa8fccfada4b3_1717		7073f0826909e86605b7f24ba93c455b_1831	4d8fdf303c55f8e586b180af2243e275_1841	2900b96dbbdb35d877a57143d080ad95_1691	K_pneumoniae_3_02159
mrkH		transcriptional activator MrkH	5	5	1	1	11021	5	12		704	704	704	9645baa8bb46fe9f9ffaa8fccfada4b3_1719		7073f0826909e86605b7f24ba93c455b_1833	4d8fdf303c55f8e586b180af2243e275_1843	2900b96dbbdb35d877a57143d080ad95_1693	K_pneumoniae_3_02160
WP_002916061.1		aldo/keto reductase family oxidoreductase	5	5	1	1	11022	5	13		878	878	878	9645baa8bb46fe9f9ffaa8fccfada4b3_1721		7073f0826909e86605b7f24ba93c455b_1835	4d8fdf303c55f8e586b180af2243e275_1847	2900b96dbbdb35d877a57143d080ad95_1695	K_pneumoniae_3_02161
WP_002916058.1		amino acid permease	5	5	1	1	11023	5	14		1229	1229	1229	9645baa8bb46fe9f9ffaa8fccfada4b3_1723		7073f0826909e86605b7f24ba93c455b_1837	4d8fdf303c55f8e586b180af2243e275_1849	2900b96dbbdb35d877a57143d080ad95_1697	K_pneumoniae_3_02162
WP_002916056.1		multidrug/biocide efflux PACE transporter	5	5	1	1	11024	5	15		461	461	461	9645baa8bb46fe9f9ffaa8fccfada4b3_1725		7073f0826909e86605b7f24ba93c455b_1839	4d8fdf303c55f8e586b180af2243e275_1851	2900b96dbbdb35d877a57143d080ad95_1699	K_pneumoniae_3_02163
WP_002916055.1		LysR family transcriptional regulator	5	5	1	1	11025	5	16		869	869	869	9645baa8bb46fe9f9ffaa8fccfada4b3_1727		7073f0826909e86605b7f24ba93c455b_1841	4d8fdf303c55f8e586b180af2243e275_1853	2900b96dbbdb35d877a57143d080ad95_1701	K_pneumoniae_3_02164
WP_002916052.1		acetyl-CoA C-acetyltransferase	5	5	1	1	11026	5	17		1178	1178	1178	9645baa8bb46fe9f9ffaa8fccfada4b3_1729		7073f0826909e86605b7f24ba93c455b_1843	4d8fdf303c55f8e586b180af2243e275_1855	2900b96dbbdb35d877a57143d080ad95_1703	K_pneumoniae_3_02165
ompK26		KdgM family porin OmpK26	5	5	1	1	11027	5	18		695	695	695	9645baa8bb46fe9f9ffaa8fccfada4b3_1731		7073f0826909e86605b7f24ba93c455b_1845	4d8fdf303c55f8e586b180af2243e275_1857	2900b96dbbdb35d877a57143d080ad95_1705	K_pneumoniae_3_02166
WP_002916048.1		PD40 domain-containing protein	5	5	1	1	11028	5	19		1175	1175	1175	9645baa8bb46fe9f9ffaa8fccfada4b3_1733		7073f0826909e86605b7f24ba93c455b_1847	4d8fdf303c55f8e586b180af2243e275_1859	2900b96dbbdb35d877a57143d080ad95_1707	K_pneumoniae_3_02167
kduD		2-dehydro-3-deoxy-D-gluconate 5-dehydrogenase KduD	5	5	1	1	11029	5	20		761	761	761	9645baa8bb46fe9f9ffaa8fccfada4b3_1735		7073f0826909e86605b7f24ba93c455b_1849	4d8fdf303c55f8e586b180af2243e275_1861	2900b96dbbdb35d877a57143d080ad95_1709	K_pneumoniae_3_02168
WP_002916001.1		sugar porter family MFS transporter	5	5	1	1	11030	5	21		1421	1421	1421	9645baa8bb46fe9f9ffaa8fccfada4b3_1737		7073f0826909e86605b7f24ba93c455b_1851	4d8fdf303c55f8e586b180af2243e275_1863	2900b96dbbdb35d877a57143d080ad95_1711	K_pneumoniae_3_02169
WP_004181200.1		LacI family DNA-binding transcriptional regulator	5	5	1	1	11031	5	22		995	995	995	9645baa8bb46fe9f9ffaa8fccfada4b3_1739		7073f0826909e86605b7f24ba93c455b_1853	4d8fdf303c55f8e586b180af2243e275_1865	2900b96dbbdb35d877a57143d080ad95_1713	K_pneumoniae_3_02170
WP_002916000.1		MFS transporter	5	5	1	1	11033	5	24		1241	1241	1241	9645baa8bb46fe9f9ffaa8fccfada4b3_1743		7073f0826909e86605b7f24ba93c455b_1857	4d8fdf303c55f8e586b180af2243e275_1869	2900b96dbbdb35d877a57143d080ad95_1717	K_pneumoniae_3_02171
WP_014906968.1		carbohydrate porin	5	5	1	1	11035	5	26		1343	1343	1343	9645baa8bb46fe9f9ffaa8fccfada4b3_1747		7073f0826909e86605b7f24ba93c455b_1861	4d8fdf303c55f8e586b180af2243e275_1873	2900b96dbbdb35d877a57143d080ad95_1721	K_pneumoniae_3_02173
WP_002915998.1		ABC transporter substrate-binding protein	5	5	1	1	11036	5	27		1286	1286	1286	9645baa8bb46fe9f9ffaa8fccfada4b3_1749		7073f0826909e86605b7f24ba93c455b_1863	4d8fdf303c55f8e586b180af2243e275_1875	2900b96dbbdb35d877a57143d080ad95_1723	K_pneumoniae_3_02174
WP_004211903.1		ABC transporter ATP-binding protein	5	5	1	1	11037	5	28		1127	1127	1127	9645baa8bb46fe9f9ffaa8fccfada4b3_1751		7073f0826909e86605b7f24ba93c455b_1865	4d8fdf303c55f8e586b180af2243e275_1877	2900b96dbbdb35d877a57143d080ad95_1725	K_pneumoniae_3_02175
WP_002915996.1		carbohydrate ABC transporter permease	5	5	1	1	11038	5	29		902	902	902	9645baa8bb46fe9f9ffaa8fccfada4b3_1753		7073f0826909e86605b7f24ba93c455b_1867	4d8fdf303c55f8e586b180af2243e275_1879	2900b96dbbdb35d877a57143d080ad95_1727	K_pneumoniae_3_02176
WP_002915995.1		sugar ABC transporter permease	5	5	1	1	11039	5	30		890	890	890	9645baa8bb46fe9f9ffaa8fccfada4b3_1755		7073f0826909e86605b7f24ba93c455b_1869	4d8fdf303c55f8e586b180af2243e275_1881	2900b96dbbdb35d877a57143d080ad95_1729	K_pneumoniae_3_02177
WP_002915993.1		cupin domain-containing protein	5	5	1	1	11040	5	31		326	326	326	9645baa8bb46fe9f9ffaa8fccfada4b3_1757		7073f0826909e86605b7f24ba93c455b_1871	4d8fdf303c55f8e586b180af2243e275_1883	2900b96dbbdb35d877a57143d080ad95_1731	K_pneumoniae_3_02178
WP_004151520.1		GntR family transcriptional regulator	5	5	1	1	6712	53	12		722	746	731	9645baa8bb46fe9f9ffaa8fccfada4b3_38		7073f0826909e86605b7f24ba93c455b_40	4d8fdf303c55f8e586b180af2243e275_40	2900b96dbbdb35d877a57143d080ad95_40	K_pneumoniae_3_02345
WP_004174519.1		aspartate/glutamate racemase	5	5	1	1	11041	5	32		713	713	713	9645baa8bb46fe9f9ffaa8fccfada4b3_1759		7073f0826909e86605b7f24ba93c455b_1873	4d8fdf303c55f8e586b180af2243e275_1885	2900b96dbbdb35d877a57143d080ad95_1733	K_pneumoniae_3_02179
WP_009308578.1		LysR family transcriptional regulator	5	5	1	1	11042	5	33		926	926	926	9645baa8bb46fe9f9ffaa8fccfada4b3_1761		7073f0826909e86605b7f24ba93c455b_1875	4d8fdf303c55f8e586b180af2243e275_1887	2900b96dbbdb35d877a57143d080ad95_1735	K_pneumoniae_3_02180
lysA		diaminopimelate decarboxylase	5	5	1	1	11043	5	34		1262	1262	1262	9645baa8bb46fe9f9ffaa8fccfada4b3_1763		7073f0826909e86605b7f24ba93c455b_1877	4d8fdf303c55f8e586b180af2243e275_1889	2900b96dbbdb35d877a57143d080ad95_1737	K_pneumoniae_3_02181
WP_004174520.1		PTS transporter subunit EIIC	5	5	1	1	11045	5	36		1337	1337	1337	9645baa8bb46fe9f9ffaa8fccfada4b3_1767		7073f0826909e86605b7f24ba93c455b_1881	4d8fdf303c55f8e586b180af2243e275_1893	2900b96dbbdb35d877a57143d080ad95_1741	K_pneumoniae_3_02183
WP_023301513.1		glycoside hydrolase family 1 protein	5	5	1	1	11046	5	37		1427	1427	1427	9645baa8bb46fe9f9ffaa8fccfada4b3_1769		7073f0826909e86605b7f24ba93c455b_1883	4d8fdf303c55f8e586b180af2243e275_1895	2900b96dbbdb35d877a57143d080ad95_1743	K_pneumoniae_3_02184
WP_002915985.1		GntR family transcriptional regulator	5	5	1	1	11047	5	38		773	773	773	9645baa8bb46fe9f9ffaa8fccfada4b3_1771		7073f0826909e86605b7f24ba93c455b_1885	4d8fdf303c55f8e586b180af2243e275_1897	2900b96dbbdb35d877a57143d080ad95_1745	K_pneumoniae_3_02185
WP_002915983.1		GNAT family N-acetyltransferase	5	5	1	1	11048	5	39		479	479	479	9645baa8bb46fe9f9ffaa8fccfada4b3_1773		7073f0826909e86605b7f24ba93c455b_1887	4d8fdf303c55f8e586b180af2243e275_1899	2900b96dbbdb35d877a57143d080ad95_1747	K_pneumoniae_3_02186
galR		HTH-type transcriptional regulator GalR	5	5	1	1	11049	5	40		1016	1016	1016	9645baa8bb46fe9f9ffaa8fccfada4b3_1775		7073f0826909e86605b7f24ba93c455b_1889	4d8fdf303c55f8e586b180af2243e275_1901	2900b96dbbdb35d877a57143d080ad95_1749	K_pneumoniae_3_02187
aas		bifunctional acyl-ACP--phospholipid O-acyltransferase/long-chain-fatty-acid--ACP ligase	5	5	1	1	11051	5	42		2159	2159	2159	9645baa8bb46fe9f9ffaa8fccfada4b3_1779		7073f0826909e86605b7f24ba93c455b_1893	4d8fdf303c55f8e586b180af2243e275_1905	2900b96dbbdb35d877a57143d080ad95_1753	K_pneumoniae_3_02188
lplT		lysophospholipid transporter LplT	5	5	1	1	11052	5	43		1193	1193	1193	9645baa8bb46fe9f9ffaa8fccfada4b3_1781		7073f0826909e86605b7f24ba93c455b_1895	4d8fdf303c55f8e586b180af2243e275_1907	2900b96dbbdb35d877a57143d080ad95_1755	K_pneumoniae_3_02189
WP_002923302.1		hypothetical protein	5	5	1	1	6717	53	17		422	500	437	9645baa8bb46fe9f9ffaa8fccfada4b3_48		7073f0826909e86605b7f24ba93c455b_50	4d8fdf303c55f8e586b180af2243e275_50	2900b96dbbdb35d877a57143d080ad95_50	K_pneumoniae_3_02350
WP_002915975.1		NADP(H)-dependent aldo-keto reductase	5	5	1	1	11053	5	44		1040	1040	1040	9645baa8bb46fe9f9ffaa8fccfada4b3_1783		7073f0826909e86605b7f24ba93c455b_1897	4d8fdf303c55f8e586b180af2243e275_1909	2900b96dbbdb35d877a57143d080ad95_1757	K_pneumoniae_3_02190
WP_002915974.1		YgdI/YgdR family lipoprotein	5	5	1	1	11054	5	45		218	218	218	9645baa8bb46fe9f9ffaa8fccfada4b3_1785		7073f0826909e86605b7f24ba93c455b_1899	4d8fdf303c55f8e586b180af2243e275_1911	2900b96dbbdb35d877a57143d080ad95_1759	K_pneumoniae_3_02191
WP_002915973.1		TerC family protein	5	5	1	1	11055	5	46		713	713	713	9645baa8bb46fe9f9ffaa8fccfada4b3_1787		7073f0826909e86605b7f24ba93c455b_1901	4d8fdf303c55f8e586b180af2243e275_1913	2900b96dbbdb35d877a57143d080ad95_1761	K_pneumoniae_3_02192
mutH		DNA mismatch repair endonuclease MutH	5	5	1	1	11056	5	47		695	695	695	9645baa8bb46fe9f9ffaa8fccfada4b3_1789		7073f0826909e86605b7f24ba93c455b_1903	4d8fdf303c55f8e586b180af2243e275_1915	2900b96dbbdb35d877a57143d080ad95_1763	K_pneumoniae_3_02193
rppH		RNA pyrophosphohydrolase	5	5	1	1	11058	5	49		530	530	530	9645baa8bb46fe9f9ffaa8fccfada4b3_1793		7073f0826909e86605b7f24ba93c455b_1907	4d8fdf303c55f8e586b180af2243e275_1919	2900b96dbbdb35d877a57143d080ad95_1767	K_pneumoniae_3_02194
ptsP		phosphoenolpyruvate--protein phosphotransferase	5	5	1	1	11059	5	50		2246	2246	2246	9645baa8bb46fe9f9ffaa8fccfada4b3_1795		7073f0826909e86605b7f24ba93c455b_1909	4d8fdf303c55f8e586b180af2243e275_1921	2900b96dbbdb35d877a57143d080ad95_1769	K_pneumoniae_3_02195
lgt		prolipoprotein diacylglyceryl transferase	5	5	1	1	11060	5	51		875	875	875	9645baa8bb46fe9f9ffaa8fccfada4b3_1797		7073f0826909e86605b7f24ba93c455b_1911	4d8fdf303c55f8e586b180af2243e275_1923	2900b96dbbdb35d877a57143d080ad95_1771	K_pneumoniae_3_02196
thyA		thymidylate synthase	5	5	1	1	11061	5	53		794	794	794	9645baa8bb46fe9f9ffaa8fccfada4b3_1799		7073f0826909e86605b7f24ba93c455b_1913	4d8fdf303c55f8e586b180af2243e275_1925	2900b96dbbdb35d877a57143d080ad95_1773	K_pneumoniae_3_02197
WP_004181182.1		DUF2509 family protein	5	5	1	1	11065	5	56		407	407	407	9645baa8bb46fe9f9ffaa8fccfada4b3_1807		7073f0826909e86605b7f24ba93c455b_1919	4d8fdf303c55f8e586b180af2243e275_1931	2900b96dbbdb35d877a57143d080ad95_1779	K_pneumoniae_3_02200
WP_002915888.1		prepilin-type N-terminal cleavage/methylation domain-containing protein	5	5	1	1	11066	5	57		323	323	323	9645baa8bb46fe9f9ffaa8fccfada4b3_1809		7073f0826909e86605b7f24ba93c455b_1921	4d8fdf303c55f8e586b180af2243e275_1933	2900b96dbbdb35d877a57143d080ad95_1781	K_pneumoniae_3_02201
recC		exodeoxyribonuclease V subunit gamma	5	5	1	1	11067	5	58		3377	3377	3377	9645baa8bb46fe9f9ffaa8fccfada4b3_1811		7073f0826909e86605b7f24ba93c455b_1923	4d8fdf303c55f8e586b180af2243e275_1935	2900b96dbbdb35d877a57143d080ad95_1783	K_pneumoniae_3_02202
ptrA		pitrilysin	5	5	1	1	11068	5	59		2885	2885	2885	9645baa8bb46fe9f9ffaa8fccfada4b3_1813		7073f0826909e86605b7f24ba93c455b_1925	4d8fdf303c55f8e586b180af2243e275_1937	2900b96dbbdb35d877a57143d080ad95_1785	K_pneumoniae_3_02203
recB		exodeoxyribonuclease V subunit beta	5	5	1	1	11069	5	60		3536	3536	3536	9645baa8bb46fe9f9ffaa8fccfada4b3_1815		7073f0826909e86605b7f24ba93c455b_1927	4d8fdf303c55f8e586b180af2243e275_1939	2900b96dbbdb35d877a57143d080ad95_1787	K_pneumoniae_3_02204
recD		exodeoxyribonuclease V subunit alpha	5	5	1	1	11070	5	61		1844	1844	1844	9645baa8bb46fe9f9ffaa8fccfada4b3_1817		7073f0826909e86605b7f24ba93c455b_1929	4d8fdf303c55f8e586b180af2243e275_1941	2900b96dbbdb35d877a57143d080ad95_1789	K_pneumoniae_3_02205
argA		amino-acid N-acetyltransferase	5	5	1	1	11072	5	63		1331	1331	1331	9645baa8bb46fe9f9ffaa8fccfada4b3_1821		7073f0826909e86605b7f24ba93c455b_1933	4d8fdf303c55f8e586b180af2243e275_1945	2900b96dbbdb35d877a57143d080ad95_1793	K_pneumoniae_3_02207
amiC		N-acetylmuramoyl-L-alanine amidase AmiC	5	5	1	1	11073	5	64		1253	1253	1253	9645baa8bb46fe9f9ffaa8fccfada4b3_1823		7073f0826909e86605b7f24ba93c455b_1935	4d8fdf303c55f8e586b180af2243e275_1947	2900b96dbbdb35d877a57143d080ad95_1795	K_pneumoniae_3_02208
cobD		threonine-phosphate decarboxylase CobD	5	5	1	1	11074	5	65		1076	1076	1076	9645baa8bb46fe9f9ffaa8fccfada4b3_1825		7073f0826909e86605b7f24ba93c455b_1937	4d8fdf303c55f8e586b180af2243e275_1949	2900b96dbbdb35d877a57143d080ad95_1797	K_pneumoniae_3_02209
pduW		acetate/propionate family kinase	5	5	1	1	11076	5	67		1214	1214	1214	9645baa8bb46fe9f9ffaa8fccfada4b3_1829		7073f0826909e86605b7f24ba93c455b_1941	4d8fdf303c55f8e586b180af2243e275_1953	2900b96dbbdb35d877a57143d080ad95_1801	K_pneumoniae_3_02211
pduV		propanediol utilization protein PduV	5	5	1	1	11077	5	68		440	440	440	9645baa8bb46fe9f9ffaa8fccfada4b3_1831		7073f0826909e86605b7f24ba93c455b_1943	4d8fdf303c55f8e586b180af2243e275_1955	2900b96dbbdb35d877a57143d080ad95_1803	K_pneumoniae_3_02212
tisB		type I toxin-antitoxin system toxin TisB	5	5	1	1	6725	53	8		89	119	113	9645baa8bb46fe9f9ffaa8fccfada4b3_64		7073f0826909e86605b7f24ba93c455b_66	4d8fdf303c55f8e586b180af2243e275_66	2900b96dbbdb35d877a57143d080ad95_66	K_pneumoniae_3_02357
pduU		propanediol utilization microcompartment protein PduU	5	5	1	1	11078	5	69		350	350	350	9645baa8bb46fe9f9ffaa8fccfada4b3_1833		7073f0826909e86605b7f24ba93c455b_1945	4d8fdf303c55f8e586b180af2243e275_1957	2900b96dbbdb35d877a57143d080ad95_1805	K_pneumoniae_3_02213
pduT		propanediol utilization microcompartment protein PduT	5	5	1	1	11079	5	70		554	554	554	9645baa8bb46fe9f9ffaa8fccfada4b3_1835		7073f0826909e86605b7f24ba93c455b_1947	4d8fdf303c55f8e586b180af2243e275_1959	2900b96dbbdb35d877a57143d080ad95_1807	K_pneumoniae_3_02214
rsxC_1		SLBB domain-containing protein	5	5	1	1	11080	5	71		1352	1352	1352	9645baa8bb46fe9f9ffaa8fccfada4b3_1837		7073f0826909e86605b7f24ba93c455b_1949	4d8fdf303c55f8e586b180af2243e275_1961	2900b96dbbdb35d877a57143d080ad95_1809	K_pneumoniae_3_02215
pduQ		1-propanol dehydrogenase PduQ	5	5	1	1	11081	5	72		1112	1112	1112	9645baa8bb46fe9f9ffaa8fccfada4b3_1839		7073f0826909e86605b7f24ba93c455b_1951	4d8fdf303c55f8e586b180af2243e275_1963	2900b96dbbdb35d877a57143d080ad95_1811	K_pneumoniae_3_02216
pduP		CoA-acylating propionaldehyde dehydrogenase PduP	5	5	1	1	11082	5	73		1388	1388	1388	9645baa8bb46fe9f9ffaa8fccfada4b3_1841		7073f0826909e86605b7f24ba93c455b_1953	4d8fdf303c55f8e586b180af2243e275_1965	2900b96dbbdb35d877a57143d080ad95_1813	K_pneumoniae_3_02217
pduO		two-domain cob(I)yrinic acid a,c-diamide adenosyltransferase PduO	5	5	1	1	11083	5	74		1016	1016	1016	9645baa8bb46fe9f9ffaa8fccfada4b3_1843		7073f0826909e86605b7f24ba93c455b_1955	4d8fdf303c55f8e586b180af2243e275_1967	2900b96dbbdb35d877a57143d080ad95_1815	K_pneumoniae_3_02218
WP_002915814.1		ethanolamine utilization protein EutN	5	5	1	1	11084	5	75		275	275	275	9645baa8bb46fe9f9ffaa8fccfada4b3_1845		7073f0826909e86605b7f24ba93c455b_1957	4d8fdf303c55f8e586b180af2243e275_1969	2900b96dbbdb35d877a57143d080ad95_1817	K_pneumoniae_3_02219
pduM		microcompartment protein PduM	5	5	1	1	11085	5	76		491	491	491	9645baa8bb46fe9f9ffaa8fccfada4b3_1847		7073f0826909e86605b7f24ba93c455b_1959	4d8fdf303c55f8e586b180af2243e275_1971	2900b96dbbdb35d877a57143d080ad95_1819	K_pneumoniae_3_02220
WP_019704764.1		phosphate propanoyltransferase	5	5	1	1	11086	5	77		632	632	632	9645baa8bb46fe9f9ffaa8fccfada4b3_1849		7073f0826909e86605b7f24ba93c455b_1961	4d8fdf303c55f8e586b180af2243e275_1973	2900b96dbbdb35d877a57143d080ad95_1821	K_pneumoniae_3_02221
WP_002915808.1		BMC domain-containing protein	5	5	1	1	11087	5	78		446	446	446	9645baa8bb46fe9f9ffaa8fccfada4b3_1851		7073f0826909e86605b7f24ba93c455b_1963	4d8fdf303c55f8e586b180af2243e275_1975	2900b96dbbdb35d877a57143d080ad95_1823	K_pneumoniae_3_02222
pduJ		propanediol utilization microcompartment protein PduJ	5	5	1	1	11088	5	79		275	275	275	9645baa8bb46fe9f9ffaa8fccfada4b3_1853		7073f0826909e86605b7f24ba93c455b_1965	4d8fdf303c55f8e586b180af2243e275_1977	2900b96dbbdb35d877a57143d080ad95_1825	K_pneumoniae_3_02223
WP_002915803.1		glycerol dehydratase reactivase beta/small subunit family protein	5	5	1	1	11089	5	80		350	350	350	9645baa8bb46fe9f9ffaa8fccfada4b3_1855		7073f0826909e86605b7f24ba93c455b_1967	4d8fdf303c55f8e586b180af2243e275_1979	2900b96dbbdb35d877a57143d080ad95_1827	K_pneumoniae_3_02224
WP_049191561.1		diol dehydratase reactivase subunit alpha	5	5	1	1	11090	5	81		1832	1832	1832	9645baa8bb46fe9f9ffaa8fccfada4b3_1857		7073f0826909e86605b7f24ba93c455b_1969	4d8fdf303c55f8e586b180af2243e275_1981	2900b96dbbdb35d877a57143d080ad95_1829	K_pneumoniae_3_02225
pduE		propanediol dehydratase small subunit PduE	5	5	1	1	11091	5	82		524	524	524	9645baa8bb46fe9f9ffaa8fccfada4b3_1859		7073f0826909e86605b7f24ba93c455b_1971	4d8fdf303c55f8e586b180af2243e275_1983	2900b96dbbdb35d877a57143d080ad95_1831	K_pneumoniae_3_02226
pduD		propanediol dehydratase medium subunit PduD	5	5	1	1	11092	5	83		689	689	689	9645baa8bb46fe9f9ffaa8fccfada4b3_1861		7073f0826909e86605b7f24ba93c455b_1973	4d8fdf303c55f8e586b180af2243e275_1985	2900b96dbbdb35d877a57143d080ad95_1833	K_pneumoniae_3_02227
pduC		propanediol dehydratase large subunit PduC	5	5	1	1	11093	5	84		1664	1664	1664	9645baa8bb46fe9f9ffaa8fccfada4b3_1863		7073f0826909e86605b7f24ba93c455b_1975	4d8fdf303c55f8e586b180af2243e275_1987	2900b96dbbdb35d877a57143d080ad95_1835	K_pneumoniae_3_02228
pduB		propanediol utilization microcompartment protein PduB	5	5	1	1	11094	5	85		812	812	812	9645baa8bb46fe9f9ffaa8fccfada4b3_1865		7073f0826909e86605b7f24ba93c455b_1977	4d8fdf303c55f8e586b180af2243e275_1989	2900b96dbbdb35d877a57143d080ad95_1837	K_pneumoniae_3_02229
pduA		propanediol utilization microcompartment protein PduA	5	5	1	1	11095	5	112		284	284	284	9645baa8bb46fe9f9ffaa8fccfada4b3_1867		7073f0826909e86605b7f24ba93c455b_1979	4d8fdf303c55f8e586b180af2243e275_1991	2900b96dbbdb35d877a57143d080ad95_1839	K_pneumoniae_3_02230
pduF		propanediol diffusion facilitator PduF	5	5	1	1	11096	5	111		809	809	809	9645baa8bb46fe9f9ffaa8fccfada4b3_1869		7073f0826909e86605b7f24ba93c455b_1981	4d8fdf303c55f8e586b180af2243e275_1993	2900b96dbbdb35d877a57143d080ad95_1841	K_pneumoniae_3_02231
pocR		regulatory protein PocR	5	5	1	1	11097	5	110		911	911	911	9645baa8bb46fe9f9ffaa8fccfada4b3_1871		7073f0826909e86605b7f24ba93c455b_1983	4d8fdf303c55f8e586b180af2243e275_1995	2900b96dbbdb35d877a57143d080ad95_1843	K_pneumoniae_3_02232
WP_032713032.1		phosphonoacetaldehyde hydrolase	5	5	1	1	6853	104	11		809	809	809	9645baa8bb46fe9f9ffaa8fccfada4b3_90		7073f0826909e86605b7f24ba93c455b_92	4d8fdf303c55f8e586b180af2243e275_92	2900b96dbbdb35d877a57143d080ad95_92	K_pneumoniae_3_02369
WP_121593165.1		cobyrinate a,c-diamide synthase	5	5	1	1	11098	5	109		1376	1376	1376	9645baa8bb46fe9f9ffaa8fccfada4b3_1874		7073f0826909e86605b7f24ba93c455b_1986	4d8fdf303c55f8e586b180af2243e275_1998	2900b96dbbdb35d877a57143d080ad95_1846	K_pneumoniae_3_02233
cbiB		adenosylcobinamide-phosphate synthase CbiB	5	5	1	1	11099	5	108		959	959	959	9645baa8bb46fe9f9ffaa8fccfada4b3_1876		7073f0826909e86605b7f24ba93c455b_1988	4d8fdf303c55f8e586b180af2243e275_2000	2900b96dbbdb35d877a57143d080ad95_1848	K_pneumoniae_3_02234
WP_002915711.1		cobalt-precorrin-8 methylmutase	5	5	1	1	11100	5	107		635	635	635	9645baa8bb46fe9f9ffaa8fccfada4b3_1878		7073f0826909e86605b7f24ba93c455b_1990	4d8fdf303c55f8e586b180af2243e275_2002	2900b96dbbdb35d877a57143d080ad95_1850	K_pneumoniae_3_02235
cbiD		cobalt-precorrin-5B (C(1))-methyltransferase CbiD	5	5	1	1	11101	5	106		1139	1139	1139	9645baa8bb46fe9f9ffaa8fccfada4b3_1880		7073f0826909e86605b7f24ba93c455b_1992	4d8fdf303c55f8e586b180af2243e275_2004	2900b96dbbdb35d877a57143d080ad95_1852	K_pneumoniae_3_02236
WP_048995698.1		cobalt-precorrin-7 (C(5))-methyltransferase	5	5	1	1	11102	5	105		605	605	605	9645baa8bb46fe9f9ffaa8fccfada4b3_1882		7073f0826909e86605b7f24ba93c455b_1994	4d8fdf303c55f8e586b180af2243e275_2006	2900b96dbbdb35d877a57143d080ad95_1854	K_pneumoniae_3_02237
WP_002915684.1		decarboxylating cobalt-precorrin-6B (C(15))-methyltransferase	5	5	1	1	11103	5	104		569	569	569	9645baa8bb46fe9f9ffaa8fccfada4b3_1884		7073f0826909e86605b7f24ba93c455b_1996	4d8fdf303c55f8e586b180af2243e275_2008	2900b96dbbdb35d877a57143d080ad95_1856	K_pneumoniae_3_02238
WP_004149602.1		cobalt-precorrin-4 methyltransferase	5	5	1	1	11104	5	103		773	773	773	9645baa8bb46fe9f9ffaa8fccfada4b3_1886		7073f0826909e86605b7f24ba93c455b_1998	4d8fdf303c55f8e586b180af2243e275_2010	2900b96dbbdb35d877a57143d080ad95_1858	K_pneumoniae_3_02239
cbiG		cobalt-precorrin 5A hydrolase	5	5	1	1	11105	5	102		1055	1055	1055	9645baa8bb46fe9f9ffaa8fccfada4b3_1888		7073f0826909e86605b7f24ba93c455b_2000	4d8fdf303c55f8e586b180af2243e275_2012	2900b96dbbdb35d877a57143d080ad95_1860	K_pneumoniae_3_02240
WP_004143930.1		precorrin-3B C(17)-methyltransferase	5	5	1	1	11106	5	101		725	725	725	9645baa8bb46fe9f9ffaa8fccfada4b3_1890		7073f0826909e86605b7f24ba93c455b_2002	4d8fdf303c55f8e586b180af2243e275_2014	2900b96dbbdb35d877a57143d080ad95_1862	K_pneumoniae_3_02241
WP_002915627.1		cobalt-precorrin-6A reductase	5	5	1	1	11107	5	100		785	785	785	9645baa8bb46fe9f9ffaa8fccfada4b3_1892		7073f0826909e86605b7f24ba93c455b_2004	4d8fdf303c55f8e586b180af2243e275_2016	2900b96dbbdb35d877a57143d080ad95_1864	K_pneumoniae_3_02242
WP_004173868.1		carbohydrate porin	5	10	2	1	6846				1379	1382	1380	9645baa8bb46fe9f9ffaa8fccfada4b3_104 9645baa8bb46fe9f9ffaa8fccfada4b3_8814		7073f0826909e86605b7f24ba93c455b_106 7073f0826909e86605b7f24ba93c455b_9080	4d8fdf303c55f8e586b180af2243e275_106 4d8fdf303c55f8e586b180af2243e275_9303	2900b96dbbdb35d877a57143d080ad95_106 2900b96dbbdb35d877a57143d080ad95_9445	K_pneumoniae_3_02376 K_pneumoniae_3_04439
WP_004174588.1		sirohydrochlorin cobaltochelatase	5	5	1	1	11108	5	99		794	794	794	9645baa8bb46fe9f9ffaa8fccfada4b3_1894		7073f0826909e86605b7f24ba93c455b_2006	4d8fdf303c55f8e586b180af2243e275_2018	2900b96dbbdb35d877a57143d080ad95_1866	K_pneumoniae_3_02243
WP_002915624.1		cobalt-factor II C(20)-methyltransferase	5	5	1	1	11109	5	98		710	710	710	9645baa8bb46fe9f9ffaa8fccfada4b3_1896		7073f0826909e86605b7f24ba93c455b_2008	4d8fdf303c55f8e586b180af2243e275_2020	2900b96dbbdb35d877a57143d080ad95_1868	K_pneumoniae_3_02244
cbiM		cobalt ECF transporter S component CbiM	5	5	1	1	11110	5	97		737	737	737	9645baa8bb46fe9f9ffaa8fccfada4b3_1898		7073f0826909e86605b7f24ba93c455b_2010	4d8fdf303c55f8e586b180af2243e275_2022	2900b96dbbdb35d877a57143d080ad95_1870	K_pneumoniae_3_02245
WP_002915619.1		energy-coupling factor ABC transporter substrate-binding protein	5	5	1	1	11111	5	96		281	281	281	9645baa8bb46fe9f9ffaa8fccfada4b3_1900		7073f0826909e86605b7f24ba93c455b_2012	4d8fdf303c55f8e586b180af2243e275_2024	2900b96dbbdb35d877a57143d080ad95_1872	K_pneumoniae_3_02246
WP_004143925.1		energy-coupling factor ABC transporter transmembrane protein	5	5	1	1	11112	5	95		677	677	677	9645baa8bb46fe9f9ffaa8fccfada4b3_1902		7073f0826909e86605b7f24ba93c455b_2014	4d8fdf303c55f8e586b180af2243e275_2026	2900b96dbbdb35d877a57143d080ad95_1874	K_pneumoniae_3_02247
WP_002915614.1		energy-coupling factor ABC transporter ATP-binding protein	5	5	1	1	11113	5	94		824	824	824	9645baa8bb46fe9f9ffaa8fccfada4b3_1904		7073f0826909e86605b7f24ba93c455b_2016	4d8fdf303c55f8e586b180af2243e275_2028	2900b96dbbdb35d877a57143d080ad95_1876	K_pneumoniae_3_02248
cobQ		cobyric acid synthase	5	5	1	1	11114	5	93		1523	1523	1523	9645baa8bb46fe9f9ffaa8fccfada4b3_1906		7073f0826909e86605b7f24ba93c455b_2018	4d8fdf303c55f8e586b180af2243e275_2030	2900b96dbbdb35d877a57143d080ad95_1878	K_pneumoniae_3_02249
cobU		bifunctional adenosylcobinamide kinase/adenosylcobinamide-phosphate guanylyltransferase	5	5	1	1	11115	5	92		545	545	545	9645baa8bb46fe9f9ffaa8fccfada4b3_1908		7073f0826909e86605b7f24ba93c455b_2020	4d8fdf303c55f8e586b180af2243e275_2032	2900b96dbbdb35d877a57143d080ad95_1880	K_pneumoniae_3_02250
group_1718	cobT	nicotinate-nucleotide--dimethylbenzimidazole phosphoribosyltransferase	5	5	1	1	11116	5	91		1055	1055	1055	9645baa8bb46fe9f9ffaa8fccfada4b3_1910		7073f0826909e86605b7f24ba93c455b_2022	4d8fdf303c55f8e586b180af2243e275_2034	2900b96dbbdb35d877a57143d080ad95_1882	K_pneumoniae_3_02251
mltA		murein transglycosylase A	5	5	1	1	11117	5	90		1097	1097	1097	9645baa8bb46fe9f9ffaa8fccfada4b3_1921		7073f0826909e86605b7f24ba93c455b_2033	4d8fdf303c55f8e586b180af2243e275_2045	2900b96dbbdb35d877a57143d080ad95_1893	K_pneumoniae_3_02255
WP_004145033.1		hypothetical protein	5	5	1	1	6834	14	12		275	290	278	9645baa8bb46fe9f9ffaa8fccfada4b3_128		7073f0826909e86605b7f24ba93c455b_130	4d8fdf303c55f8e586b180af2243e275_130	2900b96dbbdb35d877a57143d080ad95_130	K_pneumoniae_3_02388
tcdA		tRNA cyclic N6-threonylcarbamoyladenosine(37) synthase TcdA	5	5	1	1	11118	5	89		821	821	821	9645baa8bb46fe9f9ffaa8fccfada4b3_1923		7073f0826909e86605b7f24ba93c455b_2035	4d8fdf303c55f8e586b180af2243e275_2047	2900b96dbbdb35d877a57143d080ad95_1895	K_pneumoniae_3_02256
csdE		cysteine desulfurase sulfur acceptor subunit CsdE	5	5	1	1	11119	5	88		431	431	431	9645baa8bb46fe9f9ffaa8fccfada4b3_1925		7073f0826909e86605b7f24ba93c455b_2037	4d8fdf303c55f8e586b180af2243e275_2049	2900b96dbbdb35d877a57143d080ad95_1897	K_pneumoniae_3_02257
csdA		cysteine desulfurase CsdA	5	5	1	1	11120	5	87		1205	1205	1205	9645baa8bb46fe9f9ffaa8fccfada4b3_1927		7073f0826909e86605b7f24ba93c455b_2039	4d8fdf303c55f8e586b180af2243e275_2051	2900b96dbbdb35d877a57143d080ad95_1899	K_pneumoniae_3_02258
WP_002915543.1		DUF423 domain-containing protein	5	5	1	1	11016	30	28		395	395	395	9645baa8bb46fe9f9ffaa8fccfada4b3_1933		7073f0826909e86605b7f24ba93c455b_2045	4d8fdf303c55f8e586b180af2243e275_2057	2900b96dbbdb35d877a57143d080ad95_1905	K_pneumoniae_3_02261
rlmM		23S rRNA (cytidine(2498)-2'-O)-methyltransferase RlmM	5	5	1	1	11015	30	29		1100	1100	1100	9645baa8bb46fe9f9ffaa8fccfada4b3_1935		7073f0826909e86605b7f24ba93c455b_2047	4d8fdf303c55f8e586b180af2243e275_2059	2900b96dbbdb35d877a57143d080ad95_1907	K_pneumoniae_3_02262
fucR		L-fucose operon activator	5	5	1	1	11014	30	30		710	710	710	9645baa8bb46fe9f9ffaa8fccfada4b3_1937		7073f0826909e86605b7f24ba93c455b_2049	4d8fdf303c55f8e586b180af2243e275_2061	2900b96dbbdb35d877a57143d080ad95_1909	K_pneumoniae_3_02263
fucU		L-fucose mutarotase	5	5	1	1	11013	30	31		422	422	422	9645baa8bb46fe9f9ffaa8fccfada4b3_1939		7073f0826909e86605b7f24ba93c455b_2051	4d8fdf303c55f8e586b180af2243e275_2063	2900b96dbbdb35d877a57143d080ad95_1911	K_pneumoniae_3_02264
fucK		L-fuculokinase	5	5	1	1	11012	30	32		1418	1418	1418	9645baa8bb46fe9f9ffaa8fccfada4b3_1941		7073f0826909e86605b7f24ba93c455b_2053	4d8fdf303c55f8e586b180af2243e275_2065	2900b96dbbdb35d877a57143d080ad95_1913	K_pneumoniae_3_02265
fucI		L-fucose isomerase	5	5	1	1	11011	30	33		1775	1775	1775	9645baa8bb46fe9f9ffaa8fccfada4b3_1943		7073f0826909e86605b7f24ba93c455b_2055	4d8fdf303c55f8e586b180af2243e275_2067	2900b96dbbdb35d877a57143d080ad95_1915	K_pneumoniae_3_02266
fucP		L-fucose:H+ symporter permease	5	5	1	1	11010	30	34		1310	1310	1310	9645baa8bb46fe9f9ffaa8fccfada4b3_1945		7073f0826909e86605b7f24ba93c455b_2057	4d8fdf303c55f8e586b180af2243e275_2069	2900b96dbbdb35d877a57143d080ad95_1917	K_pneumoniae_3_02267
WP_004234160.1		DMT family transporter	5	5	1	1	6833	14	13		902	938	930	9645baa8bb46fe9f9ffaa8fccfada4b3_130		7073f0826909e86605b7f24ba93c455b_132	4d8fdf303c55f8e586b180af2243e275_132	2900b96dbbdb35d877a57143d080ad95_132	K_pneumoniae_3_02389
fucA		L-fuculose-phosphate aldolase	5	5	1	1	11009	30	35		647	647	647	9645baa8bb46fe9f9ffaa8fccfada4b3_1947		7073f0826909e86605b7f24ba93c455b_2059	4d8fdf303c55f8e586b180af2243e275_2071	2900b96dbbdb35d877a57143d080ad95_1919	K_pneumoniae_3_02268
group_1731	fucO	lactaldehyde reductase	5	5	1	1	11008	30	36		1148	1148	1148	9645baa8bb46fe9f9ffaa8fccfada4b3_1949		7073f0826909e86605b7f24ba93c455b_2061	4d8fdf303c55f8e586b180af2243e275_2073	2900b96dbbdb35d877a57143d080ad95_1921	K_pneumoniae_3_02269
xni		flap endonuclease Xni	5	5	1	1	11007	30	37		755	755	755	9645baa8bb46fe9f9ffaa8fccfada4b3_1951		7073f0826909e86605b7f24ba93c455b_2063	4d8fdf303c55f8e586b180af2243e275_2075	2900b96dbbdb35d877a57143d080ad95_1923	K_pneumoniae_3_02270
WP_004142865.1		sigma-54-dependent Fis family transcriptional regulator	5	5	1	1	11006	30	27		1943	1943	1943	9645baa8bb46fe9f9ffaa8fccfada4b3_1953		7073f0826909e86605b7f24ba93c455b_2065	4d8fdf303c55f8e586b180af2243e275_2077	2900b96dbbdb35d877a57143d080ad95_1925	K_pneumoniae_3_02271
group_1734	ssuD	FMNH2-dependent alkanesulfonate monooxygenase	5	5	1	1	11004	30	25		1172	1172	1172	9645baa8bb46fe9f9ffaa8fccfada4b3_1957		7073f0826909e86605b7f24ba93c455b_2069	4d8fdf303c55f8e586b180af2243e275_2081	2900b96dbbdb35d877a57143d080ad95_1929	K_pneumoniae_3_02272
WP_021466922.1		FAD/NAD(P)-binding protein	5	5	1	1	11003	30	24		1397	1397	1397	9645baa8bb46fe9f9ffaa8fccfada4b3_1959		7073f0826909e86605b7f24ba93c455b_2071	4d8fdf303c55f8e586b180af2243e275_2083	2900b96dbbdb35d877a57143d080ad95_1931	K_pneumoniae_3_02273
WP_023285506.1		ATP-binding cassette domain-containing protein	5	5	1	1	11001	30	22		1022	1022	1022	9645baa8bb46fe9f9ffaa8fccfada4b3_1963		7073f0826909e86605b7f24ba93c455b_2075	4d8fdf303c55f8e586b180af2243e275_2087	2900b96dbbdb35d877a57143d080ad95_1935	K_pneumoniae_3_02275
WP_002915267.1		ABC transporter permease	5	5	1	1	11000	30	21		698	698	698	9645baa8bb46fe9f9ffaa8fccfada4b3_1965		7073f0826909e86605b7f24ba93c455b_2077	4d8fdf303c55f8e586b180af2243e275_2089	2900b96dbbdb35d877a57143d080ad95_1937	K_pneumoniae_3_02276
WP_002915265.1		metal ABC transporter substrate-binding protein	5	5	1	1	10999	30	20		878	878	878	9645baa8bb46fe9f9ffaa8fccfada4b3_1967		7073f0826909e86605b7f24ba93c455b_2079	4d8fdf303c55f8e586b180af2243e275_2091	2900b96dbbdb35d877a57143d080ad95_1939	K_pneumoniae_3_02277
WP_009485154.1		GNAT family N-acetyltransferase	5	5	1	1	6824	14	22		416	416	416	9645baa8bb46fe9f9ffaa8fccfada4b3_148		7073f0826909e86605b7f24ba93c455b_150	4d8fdf303c55f8e586b180af2243e275_150	2900b96dbbdb35d877a57143d080ad95_150	K_pneumoniae_3_02396
WP_004149572.1		MFS transporter	5	5	1	1	10998	30	19		1421	1421	1421	9645baa8bb46fe9f9ffaa8fccfada4b3_1969		7073f0826909e86605b7f24ba93c455b_2081	4d8fdf303c55f8e586b180af2243e275_2093	2900b96dbbdb35d877a57143d080ad95_1941	K_pneumoniae_3_02278
WP_002915263.1		acyl-CoA dehydrogenase family protein	5	5	1	1	10997	30	18		1223	1223	1223	9645baa8bb46fe9f9ffaa8fccfada4b3_1971		7073f0826909e86605b7f24ba93c455b_2083	4d8fdf303c55f8e586b180af2243e275_2095	2900b96dbbdb35d877a57143d080ad95_1943	K_pneumoniae_3_02279
WP_002915261.1		aliphatic sulfonate ABC transporter substrate-binding protein	5	5	1	1	10996	30	17		941	941	941	9645baa8bb46fe9f9ffaa8fccfada4b3_1973		7073f0826909e86605b7f24ba93c455b_2085	4d8fdf303c55f8e586b180af2243e275_2097	2900b96dbbdb35d877a57143d080ad95_1945	K_pneumoniae_3_02280
WP_002915259.1		L-serine ammonia-lyase	5	5	1	1	10995	30	16		1367	1367	1367	9645baa8bb46fe9f9ffaa8fccfada4b3_1975		7073f0826909e86605b7f24ba93c455b_2087	4d8fdf303c55f8e586b180af2243e275_2099	2900b96dbbdb35d877a57143d080ad95_1947	K_pneumoniae_3_04348
WP_004151070.1		HAAAP family serine/threonine permease	5	5	1	1	10994	30	15		1289	1289	1289	9645baa8bb46fe9f9ffaa8fccfada4b3_1977		7073f0826909e86605b7f24ba93c455b_2089	4d8fdf303c55f8e586b180af2243e275_2101	2900b96dbbdb35d877a57143d080ad95_1949	K_pneumoniae_3_04347
ppnN		nucleotide 5'-monophosphate nucleosidase PpnN	5	5	1	1	11296	30	14		1367	1367	1367	9645baa8bb46fe9f9ffaa8fccfada4b3_1979		7073f0826909e86605b7f24ba93c455b_2091	4d8fdf303c55f8e586b180af2243e275_2103	2900b96dbbdb35d877a57143d080ad95_1951	K_pneumoniae_3_04346
queF		NADPH-dependent 7-cyano-7-deazaguanine reductase QueF	5	5	1	1	11297	30	13		845	845	845	9645baa8bb46fe9f9ffaa8fccfada4b3_1981		7073f0826909e86605b7f24ba93c455b_2093	4d8fdf303c55f8e586b180af2243e275_2105	2900b96dbbdb35d877a57143d080ad95_1953	K_pneumoniae_3_04345
syd		SecY-interacting protein	5	5	1	1	11298	30	12		545	545	545	9645baa8bb46fe9f9ffaa8fccfada4b3_1983		7073f0826909e86605b7f24ba93c455b_2095	4d8fdf303c55f8e586b180af2243e275_2107	2900b96dbbdb35d877a57143d080ad95_1955	K_pneumoniae_3_04344
WP_002915249.1		YqcC family protein	5	5	1	1	11299	30	11		329	329	329	9645baa8bb46fe9f9ffaa8fccfada4b3_1985		7073f0826909e86605b7f24ba93c455b_2097	4d8fdf303c55f8e586b180af2243e275_2109	2900b96dbbdb35d877a57143d080ad95_1957	K_pneumoniae_3_04343
truC		tRNA pseudouridine(65) synthase TruC	5	5	1	1	11300	30	10		794	794	794	9645baa8bb46fe9f9ffaa8fccfada4b3_1987		7073f0826909e86605b7f24ba93c455b_2099	4d8fdf303c55f8e586b180af2243e275_2111	2900b96dbbdb35d877a57143d080ad95_1959	K_pneumoniae_3_04342
WP_072217508.1		LysR family transcriptional regulator	5	5	1	1	6820	14	26		914	971	959	9645baa8bb46fe9f9ffaa8fccfada4b3_154		7073f0826909e86605b7f24ba93c455b_156	4d8fdf303c55f8e586b180af2243e275_156	2900b96dbbdb35d877a57143d080ad95_156	K_pneumoniae_3_02400
WP_002915235.1		flavodoxin	5	5	1	1	11301	30	9		443	443	443	9645baa8bb46fe9f9ffaa8fccfada4b3_1989		7073f0826909e86605b7f24ba93c455b_2101	4d8fdf303c55f8e586b180af2243e275_2113	2900b96dbbdb35d877a57143d080ad95_1961	K_pneumoniae_3_04341
WP_002915225.1		MFS transporter	5	5	1	1	11302	30	8		1352	1352	1352	9645baa8bb46fe9f9ffaa8fccfada4b3_1991		7073f0826909e86605b7f24ba93c455b_2103	4d8fdf303c55f8e586b180af2243e275_2115	2900b96dbbdb35d877a57143d080ad95_1963	K_pneumoniae_3_04340
WP_002915224.1		glucarate dehydratase family protein	5	5	1	1	11303	30	7		1340	1340	1340	9645baa8bb46fe9f9ffaa8fccfada4b3_1993		7073f0826909e86605b7f24ba93c455b_2105	4d8fdf303c55f8e586b180af2243e275_2117	2900b96dbbdb35d877a57143d080ad95_1965	K_pneumoniae_3_04339
gudD		glucarate dehydratase	5	5	1	1	11304	30	6		1340	1340	1340	9645baa8bb46fe9f9ffaa8fccfada4b3_1995		7073f0826909e86605b7f24ba93c455b_2107	4d8fdf303c55f8e586b180af2243e275_2119	2900b96dbbdb35d877a57143d080ad95_1967	K_pneumoniae_3_04338
WP_004210599.1		glycerate kinase	5	5	1	1	11305	30	5		1139	1139	1139	9645baa8bb46fe9f9ffaa8fccfada4b3_1997		7073f0826909e86605b7f24ba93c455b_2109	4d8fdf303c55f8e586b180af2243e275_2121	2900b96dbbdb35d877a57143d080ad95_1969	K_pneumoniae_3_04337
barA		two-component sensor histidine kinase BarA	5	5	1	1	11306	30	4		2750	2750	2750	9645baa8bb46fe9f9ffaa8fccfada4b3_1999		7073f0826909e86605b7f24ba93c455b_2111	4d8fdf303c55f8e586b180af2243e275_2123	2900b96dbbdb35d877a57143d080ad95_1971	K_pneumoniae_3_04336
rlmD		23S rRNA (uracil(1939)-C(5))-methyltransferase RlmD	5	5	1	1	11307	30	3		1304	1304	1304	9645baa8bb46fe9f9ffaa8fccfada4b3_2001		7073f0826909e86605b7f24ba93c455b_2113	4d8fdf303c55f8e586b180af2243e275_2125	2900b96dbbdb35d877a57143d080ad95_1973	K_pneumoniae_3_04335
relA		GTP diphosphokinase	5	5	1	1	11308	30	2		2237	2237	2237	9645baa8bb46fe9f9ffaa8fccfada4b3_2003		7073f0826909e86605b7f24ba93c455b_2115	4d8fdf303c55f8e586b180af2243e275_2127	2900b96dbbdb35d877a57143d080ad95_1975	K_pneumoniae_3_04334
mazG		nucleoside triphosphate pyrophosphohydrolase	5	5	1	1	11309	30	1		791	791	791	9645baa8bb46fe9f9ffaa8fccfada4b3_2005		7073f0826909e86605b7f24ba93c455b_2117	4d8fdf303c55f8e586b180af2243e275_2129	2900b96dbbdb35d877a57143d080ad95_1977	K_pneumoniae_3_04333
WP_004210593.1		SDR family oxidoreductase	5	5	1	1	11294	154	1		1109	1109	1109	9645baa8bb46fe9f9ffaa8fccfada4b3_2011		7073f0826909e86605b7f24ba93c455b_2123	4d8fdf303c55f8e586b180af2243e275_2135	2900b96dbbdb35d877a57143d080ad95_1983	K_pneumoniae_3_04330
zapB		septal ring assembly protein ZapB	5	5	1	1	9240	14	52		239	245	243	9645baa8bb46fe9f9ffaa8fccfada4b3_207		7073f0826909e86605b7f24ba93c455b_209	4d8fdf303c55f8e586b180af2243e275_209	2900b96dbbdb35d877a57143d080ad95_221	K_pneumoniae_3_02426
queE		7-carboxy-7-deazaguanine synthase QueE	5	5	1	1	11293	154	2		671	671	671	9645baa8bb46fe9f9ffaa8fccfada4b3_2013		7073f0826909e86605b7f24ba93c455b_2125	4d8fdf303c55f8e586b180af2243e275_2137	2900b96dbbdb35d877a57143d080ad95_1985	K_pneumoniae_3_04329
queD		6-carboxytetrahydropterin synthase QueD	5	5	1	1	11292	154	5		365	365	365	9645baa8bb46fe9f9ffaa8fccfada4b3_2015		7073f0826909e86605b7f24ba93c455b_2127	4d8fdf303c55f8e586b180af2243e275_2139	2900b96dbbdb35d877a57143d080ad95_1987	K_pneumoniae_3_04328
cysJ		NADPH-dependent assimilatory sulfite reductase flavoprotein subunit	5	5	1	1	11291	154	4		1799	1799	1799	9645baa8bb46fe9f9ffaa8fccfada4b3_2017		7073f0826909e86605b7f24ba93c455b_2129	4d8fdf303c55f8e586b180af2243e275_2141	2900b96dbbdb35d877a57143d080ad95_1989	K_pneumoniae_3_04327
cysI		assimilatory sulfite reductase (NADPH) hemoprotein subunit	5	5	1	1	11257	154	3		1712	1712	1712	9645baa8bb46fe9f9ffaa8fccfada4b3_2019		7073f0826909e86605b7f24ba93c455b_2131	4d8fdf303c55f8e586b180af2243e275_2143	2900b96dbbdb35d877a57143d080ad95_1991	K_pneumoniae_3_04326
cysN		sulfate adenylyltransferase subunit CysN	5	5	1	1	11243	158	5		1427	1427	1427	9645baa8bb46fe9f9ffaa8fccfada4b3_2029		7073f0826909e86605b7f24ba93c455b_2141	4d8fdf303c55f8e586b180af2243e275_2153	2900b96dbbdb35d877a57143d080ad95_2001	K_pneumoniae_3_04311
cysC		adenylyl-sulfate kinase	5	5	1	1	11244	158	4		605	605	605	9645baa8bb46fe9f9ffaa8fccfada4b3_2031		7073f0826909e86605b7f24ba93c455b_2143	4d8fdf303c55f8e586b180af2243e275_2155	2900b96dbbdb35d877a57143d080ad95_2003	K_pneumoniae_3_04310
WP_002915157.1		DUF3561 family protein	5	5	1	1	11245	158	3		326	326	326	9645baa8bb46fe9f9ffaa8fccfada4b3_2033		7073f0826909e86605b7f24ba93c455b_2145	4d8fdf303c55f8e586b180af2243e275_2157	2900b96dbbdb35d877a57143d080ad95_2005	K_pneumoniae_3_04309
ftsB		cell division protein FtsB	5	5	1	1	11246	158	2		317	317	317	9645baa8bb46fe9f9ffaa8fccfada4b3_2035		7073f0826909e86605b7f24ba93c455b_2147	4d8fdf303c55f8e586b180af2243e275_2159	2900b96dbbdb35d877a57143d080ad95_2007	K_pneumoniae_3_04308
ispD		2-C-methyl-D-erythritol 4-phosphate cytidylyltransferase	5	5	1	1	11247	158	1		710	710	710	9645baa8bb46fe9f9ffaa8fccfada4b3_2037		7073f0826909e86605b7f24ba93c455b_2149	4d8fdf303c55f8e586b180af2243e275_2161	2900b96dbbdb35d877a57143d080ad95_2009	K_pneumoniae_3_04307
truD		tRNA pseudouridine(13) synthase TruD	5	5	1	1	11234	170	4		1049	1049	1049	9645baa8bb46fe9f9ffaa8fccfada4b3_2041		7073f0826909e86605b7f24ba93c455b_2153	4d8fdf303c55f8e586b180af2243e275_2165	2900b96dbbdb35d877a57143d080ad95_2013	K_pneumoniae_3_04305
surE		5'/3'-nucleotidase SurE	5	5	1	1	11235	170	3		761	761	761	9645baa8bb46fe9f9ffaa8fccfada4b3_2043		7073f0826909e86605b7f24ba93c455b_2155	4d8fdf303c55f8e586b180af2243e275_2167	2900b96dbbdb35d877a57143d080ad95_2015	K_pneumoniae_3_04304
WP_002915108.1		protein-L-isoaspartate(D-aspartate) O-methyltransferase	5	5	1	1	11236	170	2		626	626	626	9645baa8bb46fe9f9ffaa8fccfada4b3_2045		7073f0826909e86605b7f24ba93c455b_2157	4d8fdf303c55f8e586b180af2243e275_2169	2900b96dbbdb35d877a57143d080ad95_2017	K_pneumoniae_3_04303
nlpD		murein hydrolase activator NlpD	5	5	1	1	11237	170	1		1136	1136	1136	9645baa8bb46fe9f9ffaa8fccfada4b3_2047		7073f0826909e86605b7f24ba93c455b_2159	4d8fdf303c55f8e586b180af2243e275_2171	2900b96dbbdb35d877a57143d080ad95_2019	K_pneumoniae_3_04302
WP_004181081.1		LysR family transcriptional regulator	5	5	1	1	11154	21	22		887	887	887	9645baa8bb46fe9f9ffaa8fccfada4b3_2055		7073f0826909e86605b7f24ba93c455b_2167	4d8fdf303c55f8e586b180af2243e275_2179	2900b96dbbdb35d877a57143d080ad95_2027	K_pneumoniae_3_04298
WP_002915102.1		MarR family transcriptional regulator	5	5	1	1	11155	21	23		407	407	407	9645baa8bb46fe9f9ffaa8fccfada4b3_2057		7073f0826909e86605b7f24ba93c455b_2169	4d8fdf303c55f8e586b180af2243e275_2181	2900b96dbbdb35d877a57143d080ad95_2029	K_pneumoniae_3_04297
WP_002915099.1		UbiX family flavin prenyltransferase	5	5	1	1	11156	21	24		593	593	593	9645baa8bb46fe9f9ffaa8fccfada4b3_2059		7073f0826909e86605b7f24ba93c455b_2171	4d8fdf303c55f8e586b180af2243e275_2183	2900b96dbbdb35d877a57143d080ad95_2031	K_pneumoniae_3_04296
WP_004151060.1		UbiD family decarboxylase	5	5	1	1	11157	21	25		1427	1427	1427	9645baa8bb46fe9f9ffaa8fccfada4b3_2061		7073f0826909e86605b7f24ba93c455b_2173	4d8fdf303c55f8e586b180af2243e275_2185	2900b96dbbdb35d877a57143d080ad95_2033	K_pneumoniae_3_04295
WP_002915098.1		hypothetical protein	5	5	1	1	11158	21	26		236	236	236	9645baa8bb46fe9f9ffaa8fccfada4b3_2063		7073f0826909e86605b7f24ba93c455b_2175	4d8fdf303c55f8e586b180af2243e275_2187	2900b96dbbdb35d877a57143d080ad95_2035	K_pneumoniae_3_04294
WP_002915097.1		type I toxin-antitoxin system Hok family toxin	5	5	1	1	11159	21	27		152	152	152	9645baa8bb46fe9f9ffaa8fccfada4b3_2065		7073f0826909e86605b7f24ba93c455b_2177	4d8fdf303c55f8e586b180af2243e275_2189	2900b96dbbdb35d877a57143d080ad95_2037	K_pneumoniae_3_04293
WP_038807778.1		lysophospholipid acyltransferase family protein	5	5	1	1	8930	8	11		1664	1700	1692	9645baa8bb46fe9f9ffaa8fccfada4b3_266		7073f0826909e86605b7f24ba93c455b_249	4d8fdf303c55f8e586b180af2243e275_249	2900b96dbbdb35d877a57143d080ad95_261	K_pneumoniae_3_02446
WP_004149516.1		heme ABC transporter ATP-binding protein	5	5	1	1	11178	21	32		779	779	779	9645baa8bb46fe9f9ffaa8fccfada4b3_2075		7073f0826909e86605b7f24ba93c455b_2187	4d8fdf303c55f8e586b180af2243e275_2221	2900b96dbbdb35d877a57143d080ad95_2047	K_pneumoniae_3_04291
WP_021464224.1		iron ABC transporter permease	5	5	1	1	11179	21	33		995	995	995	9645baa8bb46fe9f9ffaa8fccfada4b3_2077		7073f0826909e86605b7f24ba93c455b_2189	4d8fdf303c55f8e586b180af2243e275_2223	2900b96dbbdb35d877a57143d080ad95_2049	K_pneumoniae_3_04290
WP_004181072.1		hemin ABC transporter substrate-binding protein	5	5	1	1	11180	21	34		818	818	818	9645baa8bb46fe9f9ffaa8fccfada4b3_2079		7073f0826909e86605b7f24ba93c455b_2191	4d8fdf303c55f8e586b180af2243e275_2225	2900b96dbbdb35d877a57143d080ad95_2051	K_pneumoniae_3_04289
WP_004890170.1		hemin-degrading factor	5	5	1	1	11181	21	35		1031	1031	1031	9645baa8bb46fe9f9ffaa8fccfada4b3_2081		7073f0826909e86605b7f24ba93c455b_2193	4d8fdf303c55f8e586b180af2243e275_2227	2900b96dbbdb35d877a57143d080ad95_2053	K_pneumoniae_3_04288
WP_192906266.1		TonB-dependent receptor	5	5	1	1	11182	21	36		2363	2363	2363	9645baa8bb46fe9f9ffaa8fccfada4b3_2083		7073f0826909e86605b7f24ba93c455b_2195	4d8fdf303c55f8e586b180af2243e275_2229	2900b96dbbdb35d877a57143d080ad95_2055	K_pneumoniae_3_04287
WP_002915045.1		SelT/SelW/SelH family protein	5	5	1	1	11183	21	37		293	293	293	9645baa8bb46fe9f9ffaa8fccfada4b3_2085		7073f0826909e86605b7f24ba93c455b_2197	4d8fdf303c55f8e586b180af2243e275_2231	2900b96dbbdb35d877a57143d080ad95_2057	K_pneumoniae_3_04286
WP_002915041.1		AEC family transporter	5	5	1	1	11185	21	38		941	941	941	9645baa8bb46fe9f9ffaa8fccfada4b3_2089		7073f0826909e86605b7f24ba93c455b_2201	4d8fdf303c55f8e586b180af2243e275_2235	2900b96dbbdb35d877a57143d080ad95_2061	K_pneumoniae_3_04284
WP_004181063.1		LysR family transcriptional regulator	5	5	1	1	11186	21	39		887	887	887	9645baa8bb46fe9f9ffaa8fccfada4b3_2091		7073f0826909e86605b7f24ba93c455b_2203	4d8fdf303c55f8e586b180af2243e275_2237	2900b96dbbdb35d877a57143d080ad95_2063	K_pneumoniae_3_04283
WP_004181059.1		metal ABC transporter permease	5	5	1	1	11188	21	41		854	854	854	9645baa8bb46fe9f9ffaa8fccfada4b3_2095		7073f0826909e86605b7f24ba93c455b_2207	4d8fdf303c55f8e586b180af2243e275_2241	2900b96dbbdb35d877a57143d080ad95_2067	K_pneumoniae_3_04281
sitC		iron/manganese ABC transporter permease subunit SitC	5	5	1	1	11189	21	42		848	848	848	9645baa8bb46fe9f9ffaa8fccfada4b3_2097		7073f0826909e86605b7f24ba93c455b_2209	4d8fdf303c55f8e586b180af2243e275_2243	2900b96dbbdb35d877a57143d080ad95_2069	K_pneumoniae_3_04280
WP_004185390.1		metal ABC transporter substrate-binding protein	5	5	1	1	11191	21	44		917	917	917	9645baa8bb46fe9f9ffaa8fccfada4b3_2101		7073f0826909e86605b7f24ba93c455b_2213	4d8fdf303c55f8e586b180af2243e275_2247	2900b96dbbdb35d877a57143d080ad95_2073	K_pneumoniae_3_04278
WP_004181055.1		LacI family transcriptional regulator	5	5	1	1	11192	21	45		962	962	962	9645baa8bb46fe9f9ffaa8fccfada4b3_2103		7073f0826909e86605b7f24ba93c455b_2215	4d8fdf303c55f8e586b180af2243e275_2249	2900b96dbbdb35d877a57143d080ad95_2075	K_pneumoniae_3_04277
WP_023301535.1		ROK family protein	5	5	1	1	11193	21	46		914	914	914	9645baa8bb46fe9f9ffaa8fccfada4b3_2105		7073f0826909e86605b7f24ba93c455b_2217	4d8fdf303c55f8e586b180af2243e275_2251	2900b96dbbdb35d877a57143d080ad95_2077	K_pneumoniae_3_04276
WP_002914983.1		PTS lactose/cellobiose transporter subunit IIA	5	5	1	1	11194	21	47		314	314	314	9645baa8bb46fe9f9ffaa8fccfada4b3_2107		7073f0826909e86605b7f24ba93c455b_2219	4d8fdf303c55f8e586b180af2243e275_2253	2900b96dbbdb35d877a57143d080ad95_2079	K_pneumoniae_3_04275
WP_004145789.1		PTS cellobiose transporter subunit IIC	5	5	1	1	11195	21	48		1322	1322	1322	9645baa8bb46fe9f9ffaa8fccfada4b3_2109		7073f0826909e86605b7f24ba93c455b_2221	4d8fdf303c55f8e586b180af2243e275_2255	2900b96dbbdb35d877a57143d080ad95_2081	K_pneumoniae_3_04274
WP_002914979.1		PTS sugar transporter subunit IIB	5	5	1	1	11196	21	49		314	314	314	9645baa8bb46fe9f9ffaa8fccfada4b3_2111		7073f0826909e86605b7f24ba93c455b_2223	4d8fdf303c55f8e586b180af2243e275_2257	2900b96dbbdb35d877a57143d080ad95_2083	K_pneumoniae_3_04273
WP_002914972.1		carbohydrate porin	5	5	1	1	11198	21	51		1337	1337	1337	9645baa8bb46fe9f9ffaa8fccfada4b3_2115		7073f0826909e86605b7f24ba93c455b_2227	4d8fdf303c55f8e586b180af2243e275_2261	2900b96dbbdb35d877a57143d080ad95_2087	K_pneumoniae_3_04271
WP_004193697.1		beta-1,4 mannanase	5	5	1	1	11199	21	52		2192	2192	2192	9645baa8bb46fe9f9ffaa8fccfada4b3_2117		7073f0826909e86605b7f24ba93c455b_2229	4d8fdf303c55f8e586b180af2243e275_2263	2900b96dbbdb35d877a57143d080ad95_2089	K_pneumoniae_3_04270
WP_002914970.1		glycoside hydrolase family 1 protein	5	5	1	1	11200	21	53		1400	1400	1400	9645baa8bb46fe9f9ffaa8fccfada4b3_2119		7073f0826909e86605b7f24ba93c455b_2231	4d8fdf303c55f8e586b180af2243e275_2265	2900b96dbbdb35d877a57143d080ad95_2091	K_pneumoniae_3_04269
flhA		formate hydrogenlyase transcriptional activator FlhA	5	5	1	1	11201	21	54		2072	2072	2072	9645baa8bb46fe9f9ffaa8fccfada4b3_2121		7073f0826909e86605b7f24ba93c455b_2233	4d8fdf303c55f8e586b180af2243e275_2267	2900b96dbbdb35d877a57143d080ad95_2093	K_pneumoniae_3_04268
hypE		hydrogenase expression/formation protein HypE	5	5	1	1	11202	21	55		1010	1010	1010	9645baa8bb46fe9f9ffaa8fccfada4b3_2123		7073f0826909e86605b7f24ba93c455b_2235	4d8fdf303c55f8e586b180af2243e275_2269	2900b96dbbdb35d877a57143d080ad95_2095	K_pneumoniae_3_04267
hypD		hydrogenase formation protein HypD	5	5	1	1	11203	21	56		1121	1121	1121	9645baa8bb46fe9f9ffaa8fccfada4b3_2125		7073f0826909e86605b7f24ba93c455b_2237	4d8fdf303c55f8e586b180af2243e275_2271	2900b96dbbdb35d877a57143d080ad95_2097	K_pneumoniae_3_04266
WP_002914934.1		HypC/HybG/HupF family hydrogenase formation chaperone	5	5	1	1	11204	21	57		272	272	272	9645baa8bb46fe9f9ffaa8fccfada4b3_2127		7073f0826909e86605b7f24ba93c455b_2239	4d8fdf303c55f8e586b180af2243e275_2273	2900b96dbbdb35d877a57143d080ad95_2099	K_pneumoniae_3_04265
hypB		hydrogenase nickel incorporation protein HypB	5	5	1	1	11205	21	58		872	872	872	9645baa8bb46fe9f9ffaa8fccfada4b3_2129		7073f0826909e86605b7f24ba93c455b_2241	4d8fdf303c55f8e586b180af2243e275_2275	2900b96dbbdb35d877a57143d080ad95_2101	K_pneumoniae_3_04264
hypA		hydrogenase maturation nickel metallochaperone HypA	5	5	1	1	11206	21	59		344	344	344	9645baa8bb46fe9f9ffaa8fccfada4b3_2131		7073f0826909e86605b7f24ba93c455b_2243	4d8fdf303c55f8e586b180af2243e275_2277	2900b96dbbdb35d877a57143d080ad95_2103	K_pneumoniae_3_04263
hycA		formate hydrogenlyase regulator HycA	5	5	1	1	11207	21	4		449	449	449	9645baa8bb46fe9f9ffaa8fccfada4b3_2133		7073f0826909e86605b7f24ba93c455b_2245	4d8fdf303c55f8e586b180af2243e275_2279	2900b96dbbdb35d877a57143d080ad95_2105	K_pneumoniae_3_04262
hycC		formate hydrogenlyase subunit 3	5	5	1	1	11209	21	2		1826	1826	1826	9645baa8bb46fe9f9ffaa8fccfada4b3_2137		7073f0826909e86605b7f24ba93c455b_2249	4d8fdf303c55f8e586b180af2243e275_2283	2900b96dbbdb35d877a57143d080ad95_2109	K_pneumoniae_3_04260
WP_004149485.1		respiratory chain complex I subunit 1 family protein	5	5	1	1	11210	21	1		923	923	923	9645baa8bb46fe9f9ffaa8fccfada4b3_2139		7073f0826909e86605b7f24ba93c455b_2251	4d8fdf303c55f8e586b180af2243e275_2285	2900b96dbbdb35d877a57143d080ad95_2111	K_pneumoniae_3_04259
WP_002914893.1		formate hydrogenlyase complex iron-sulfur subunit	5	5	1	1	11147	41	1		542	542	542	9645baa8bb46fe9f9ffaa8fccfada4b3_2143		7073f0826909e86605b7f24ba93c455b_2255	4d8fdf303c55f8e586b180af2243e275_2289	2900b96dbbdb35d877a57143d080ad95_2115	K_pneumoniae_3_04257
WP_002914891.1		NADH-quinone oxidoreductase subunit B family protein	5	5	1	1	11146	41	2		767	767	767	9645baa8bb46fe9f9ffaa8fccfada4b3_2145		7073f0826909e86605b7f24ba93c455b_2257	4d8fdf303c55f8e586b180af2243e275_2291	2900b96dbbdb35d877a57143d080ad95_2117	K_pneumoniae_3_04256
WP_002914887.1		formate hydrogenlyase maturation HycH family protein	5	5	1	1	11145	41	3		410	410	410	9645baa8bb46fe9f9ffaa8fccfada4b3_2147		7073f0826909e86605b7f24ba93c455b_2259	4d8fdf303c55f8e586b180af2243e275_2293	2900b96dbbdb35d877a57143d080ad95_2119	K_pneumoniae_3_04255
hycI		hydrogenase maturation peptidase HycI	5	5	1	1	11144	41	30		470	470	470	9645baa8bb46fe9f9ffaa8fccfada4b3_2149		7073f0826909e86605b7f24ba93c455b_2261	4d8fdf303c55f8e586b180af2243e275_2295	2900b96dbbdb35d877a57143d080ad95_2121	K_pneumoniae_3_04254
WP_002914883.1		type I toxin-antitoxin system SymE family toxin	5	5	1	1	11143	41	29		308	308	308	9645baa8bb46fe9f9ffaa8fccfada4b3_2151		7073f0826909e86605b7f24ba93c455b_2263	4d8fdf303c55f8e586b180af2243e275_2297	2900b96dbbdb35d877a57143d080ad95_2123	K_pneumoniae_3_04253
WP_004181034.1		6-phospho-beta-glucosidase	5	5	1	1	11142	41	28		1424	1424	1424	9645baa8bb46fe9f9ffaa8fccfada4b3_2153		7073f0826909e86605b7f24ba93c455b_2265	4d8fdf303c55f8e586b180af2243e275_2299	2900b96dbbdb35d877a57143d080ad95_2125	K_pneumoniae_3_04252
ascF		PTS cellobiose/arbutin/salicin transporter subunit IIBC	5	5	1	1	11141	41	27		1442	1442	1442	9645baa8bb46fe9f9ffaa8fccfada4b3_2155		7073f0826909e86605b7f24ba93c455b_2267	4d8fdf303c55f8e586b180af2243e275_2301	2900b96dbbdb35d877a57143d080ad95_2127	K_pneumoniae_3_04251
WP_004174685.1		LacI family DNA-binding transcriptional regulator	5	5	1	1	11140	41	26		1013	1013	1013	9645baa8bb46fe9f9ffaa8fccfada4b3_2157		7073f0826909e86605b7f24ba93c455b_2269	4d8fdf303c55f8e586b180af2243e275_2303	2900b96dbbdb35d877a57143d080ad95_2129	K_pneumoniae_3_04250
hydN		electron transport protein HydN	5	5	1	1	11139	41	25		527	527	527	9645baa8bb46fe9f9ffaa8fccfada4b3_2159		7073f0826909e86605b7f24ba93c455b_2271	4d8fdf303c55f8e586b180af2243e275_2305	2900b96dbbdb35d877a57143d080ad95_2131	K_pneumoniae_3_04249
rfaF		ADP-heptose--LPS heptosyltransferase RfaF	5	5	1	1	9148	87	15		1019	1058	1050	9645baa8bb46fe9f9ffaa8fccfada4b3_318		7073f0826909e86605b7f24ba93c455b_303	4d8fdf303c55f8e586b180af2243e275_305	2900b96dbbdb35d877a57143d080ad95_315	K_pneumoniae_3_02471
hypF		carbamoyltransferase HypF	5	5	1	1	11138	41	24		2234	2234	2234	9645baa8bb46fe9f9ffaa8fccfada4b3_2161		7073f0826909e86605b7f24ba93c455b_2273	4d8fdf303c55f8e586b180af2243e275_2307	2900b96dbbdb35d877a57143d080ad95_2133	K_pneumoniae_3_04248
WP_004181028.1		HoxN/HupN/NixA family nickel/cobalt transporter	5	5	1	1	11137	41	23		1013	1013	1013	9645baa8bb46fe9f9ffaa8fccfada4b3_2163		7073f0826909e86605b7f24ba93c455b_2275	4d8fdf303c55f8e586b180af2243e275_2309	2900b96dbbdb35d877a57143d080ad95_2135	K_pneumoniae_3_04247
norW		NADH:flavorubredoxin reductase NorW	5	5	1	1	11136	41	22		1133	1133	1133	9645baa8bb46fe9f9ffaa8fccfada4b3_2165		7073f0826909e86605b7f24ba93c455b_2277	4d8fdf303c55f8e586b180af2243e275_2311	2900b96dbbdb35d877a57143d080ad95_2137	K_pneumoniae_3_04246
norV		anaerobic nitric oxide reductase flavorubredoxin	5	5	1	1	11135	41	21		1442	1448	1445	9645baa8bb46fe9f9ffaa8fccfada4b3_2167		7073f0826909e86605b7f24ba93c455b_2279	4d8fdf303c55f8e586b180af2243e275_2313	2900b96dbbdb35d877a57143d080ad95_2139	K_pneumoniae_3_04245
norR		nitric oxide reductase transcriptional regulator NorR	5	5	1	1	11134	41	20		1550	1550	1550	9645baa8bb46fe9f9ffaa8fccfada4b3_2169		7073f0826909e86605b7f24ba93c455b_2281	4d8fdf303c55f8e586b180af2243e275_2315	2900b96dbbdb35d877a57143d080ad95_2141	K_pneumoniae_3_04244
gutQ		arabinose-5-phosphate isomerase GutQ	5	5	1	1	11133	41	19		965	965	965	9645baa8bb46fe9f9ffaa8fccfada4b3_2171		7073f0826909e86605b7f24ba93c455b_2283	4d8fdf303c55f8e586b180af2243e275_2317	2900b96dbbdb35d877a57143d080ad95_2143	K_pneumoniae_3_04243
WP_002914817.1		DNA-binding transcriptional repressor	5	5	1	1	11132	41	18		773	773	773	9645baa8bb46fe9f9ffaa8fccfada4b3_2173		7073f0826909e86605b7f24ba93c455b_2285	4d8fdf303c55f8e586b180af2243e275_2319	2900b96dbbdb35d877a57143d080ad95_2145	K_pneumoniae_3_04242
gutM		transcriptional regulator GutM	5	5	1	1	11131	41	17		359	359	359	9645baa8bb46fe9f9ffaa8fccfada4b3_2175		7073f0826909e86605b7f24ba93c455b_2287	4d8fdf303c55f8e586b180af2243e275_2321	2900b96dbbdb35d877a57143d080ad95_2147	K_pneumoniae_3_04241
srlD		sorbitol-6-phosphate dehydrogenase	5	5	1	1	11130	41	16		779	779	779	9645baa8bb46fe9f9ffaa8fccfada4b3_2177		7073f0826909e86605b7f24ba93c455b_2289	4d8fdf303c55f8e586b180af2243e275_2323	2900b96dbbdb35d877a57143d080ad95_2149	K_pneumoniae_3_04240
srlB		PTS glucitol/sorbitol transporter subunit IIA	5	5	1	1	11129	41	15		362	362	362	9645baa8bb46fe9f9ffaa8fccfada4b3_2179		7073f0826909e86605b7f24ba93c455b_2291	4d8fdf303c55f8e586b180af2243e275_2325	2900b96dbbdb35d877a57143d080ad95_2151	K_pneumoniae_3_04239
srlE		PTS glucitol/sorbitol transporter subunit IIB	5	5	1	1	11128	41	14		980	980	980	9645baa8bb46fe9f9ffaa8fccfada4b3_2181		7073f0826909e86605b7f24ba93c455b_2293	4d8fdf303c55f8e586b180af2243e275_2327	2900b96dbbdb35d877a57143d080ad95_2153	K_pneumoniae_3_04238
WP_002914812.1		PTS glucitol/sorbitol transporter subunit IIC	5	5	1	1	11127	41	13		563	563	563	9645baa8bb46fe9f9ffaa8fccfada4b3_2183		7073f0826909e86605b7f24ba93c455b_2295	4d8fdf303c55f8e586b180af2243e275_2329	2900b96dbbdb35d877a57143d080ad95_2155	K_pneumoniae_3_04237
mltB		lytic murein transglycosylase B	5	5	1	1	11126	41	12		1079	1079	1079	9645baa8bb46fe9f9ffaa8fccfada4b3_2185		7073f0826909e86605b7f24ba93c455b_2297	4d8fdf303c55f8e586b180af2243e275_2331	2900b96dbbdb35d877a57143d080ad95_2157	K_pneumoniae_3_04236
WP_002914775.1		metal ABC transporter permease	5	5	1	1	11124	41	10		863	863	863	9645baa8bb46fe9f9ffaa8fccfada4b3_2189		7073f0826909e86605b7f24ba93c455b_2301	4d8fdf303c55f8e586b180af2243e275_2335	2900b96dbbdb35d877a57143d080ad95_2161	K_pneumoniae_3_04233
WP_004174698.1		metal ABC transporter substrate-binding protein	5	5	1	1	11123	41	9		878	878	878	9645baa8bb46fe9f9ffaa8fccfada4b3_2191		7073f0826909e86605b7f24ba93c455b_2303	4d8fdf303c55f8e586b180af2243e275_2337	2900b96dbbdb35d877a57143d080ad95_2163	K_pneumoniae_3_04232
pncC		nicotinamide-nucleotide amidase	5	5	1	1	2053	41	8		497	497	497	9645baa8bb46fe9f9ffaa8fccfada4b3_2193		7073f0826909e86605b7f24ba93c455b_2305	4d8fdf303c55f8e586b180af2243e275_2339	2900b96dbbdb35d877a57143d080ad95_2165	K_pneumoniae_3_04231
recA		recombinase RecA	5	5	1	1	2054	41	7		1058	1058	1058	9645baa8bb46fe9f9ffaa8fccfada4b3_2195		7073f0826909e86605b7f24ba93c455b_2307	4d8fdf303c55f8e586b180af2243e275_2341	2900b96dbbdb35d877a57143d080ad95_2167	K_pneumoniae_3_04230
recX		recombination regulator RecX	5	5	1	1	2055	41	6		500	500	500	9645baa8bb46fe9f9ffaa8fccfada4b3_2197		7073f0826909e86605b7f24ba93c455b_2309	4d8fdf303c55f8e586b180af2243e275_2343	2900b96dbbdb35d877a57143d080ad95_2169	K_pneumoniae_3_04229
alaS		alanine--tRNA ligase	5	5	1	1	2056	41	5		2627	2627	2627	9645baa8bb46fe9f9ffaa8fccfada4b3_2199		7073f0826909e86605b7f24ba93c455b_2311	4d8fdf303c55f8e586b180af2243e275_2345	2900b96dbbdb35d877a57143d080ad95_2171	K_pneumoniae_3_04228
yqaB		fructose-1-phosphate/6-phosphogluconate phosphatase	5	5	1	1	2051	8	72		566	566	566	9645baa8bb46fe9f9ffaa8fccfada4b3_2220		7073f0826909e86605b7f24ba93c455b_2332	4d8fdf303c55f8e586b180af2243e275_2366	2900b96dbbdb35d877a57143d080ad95_2192	K_pneumoniae_3_04220
WP_002914355.1		DedA family protein	5	5	1	1	2050	8	73		428	428	428	9645baa8bb46fe9f9ffaa8fccfada4b3_2222		7073f0826909e86605b7f24ba93c455b_2334	4d8fdf303c55f8e586b180af2243e275_2368	2900b96dbbdb35d877a57143d080ad95_2194	K_pneumoniae_3_04219
gshA		glutamate--cysteine ligase	5	5	1	1	8829	8	74		1556	1556	1556	9645baa8bb46fe9f9ffaa8fccfada4b3_2224		7073f0826909e86605b7f24ba93c455b_2336	4d8fdf303c55f8e586b180af2243e275_2370	2900b96dbbdb35d877a57143d080ad95_2196	K_pneumoniae_3_04218
luxS		S-ribosylhomocysteine lyase	5	5	1	1	8830	8	75		515	515	515	9645baa8bb46fe9f9ffaa8fccfada4b3_2226		7073f0826909e86605b7f24ba93c455b_2338	4d8fdf303c55f8e586b180af2243e275_2372	2900b96dbbdb35d877a57143d080ad95_2198	K_pneumoniae_3_04217
WP_004149452.1		helix-turn-helix transcriptional regulator	5	5	1	1	8831	8	76		767	767	767	9645baa8bb46fe9f9ffaa8fccfada4b3_2228		7073f0826909e86605b7f24ba93c455b_2340	4d8fdf303c55f8e586b180af2243e275_2374	2900b96dbbdb35d877a57143d080ad95_2200	K_pneumoniae_3_04216
group_1845	leuA	2-isopropylmalate synthase	5	5	1	1	8832	8	77		1676	1676	1676	9645baa8bb46fe9f9ffaa8fccfada4b3_2230		7073f0826909e86605b7f24ba93c455b_2342	4d8fdf303c55f8e586b180af2243e275_2376	2900b96dbbdb35d877a57143d080ad95_2202	K_pneumoniae_3_04215
emrB		multidrug efflux MFS transporter permease subunit EmrB	5	5	1	1	8833	8	78		1538	1538	1538	9645baa8bb46fe9f9ffaa8fccfada4b3_2232		7073f0826909e86605b7f24ba93c455b_2344	4d8fdf303c55f8e586b180af2243e275_2378	2900b96dbbdb35d877a57143d080ad95_2204	K_pneumoniae_3_04214
emrA		multidrug efflux MFS transporter periplasmic adaptor subunit EmrA	5	5	1	1	8834	8	79		1172	1172	1172	9645baa8bb46fe9f9ffaa8fccfada4b3_2234		7073f0826909e86605b7f24ba93c455b_2346	4d8fdf303c55f8e586b180af2243e275_2380	2900b96dbbdb35d877a57143d080ad95_2206	K_pneumoniae_3_04213
mprA		transcriptional repressor MprA	5	5	1	1	8835	8	80		530	530	530	9645baa8bb46fe9f9ffaa8fccfada4b3_2236		7073f0826909e86605b7f24ba93c455b_2348	4d8fdf303c55f8e586b180af2243e275_2382	2900b96dbbdb35d877a57143d080ad95_2208	K_pneumoniae_3_04212
ygaH		L-valine transporter subunit YgaH	5	5	1	1	8836	8	81		335	335	335	9645baa8bb46fe9f9ffaa8fccfada4b3_2238		7073f0826909e86605b7f24ba93c455b_2350	4d8fdf303c55f8e586b180af2243e275_2384	2900b96dbbdb35d877a57143d080ad95_2210	K_pneumoniae_3_04211
WP_002922460.1		glycosyltransferase family 2 protein	5	5	1	1	9164	121	1		737	788	777	9645baa8bb46fe9f9ffaa8fccfada4b3_326		7073f0826909e86605b7f24ba93c455b_311	4d8fdf303c55f8e586b180af2243e275_313	2900b96dbbdb35d877a57143d080ad95_323	K_pneumoniae_3_02475
WP_002914333.1		AzlC family ABC transporter permease	5	5	1	1	8837	8	82		746	746	746	9645baa8bb46fe9f9ffaa8fccfada4b3_2240		7073f0826909e86605b7f24ba93c455b_2352	4d8fdf303c55f8e586b180af2243e275_2386	2900b96dbbdb35d877a57143d080ad95_2212	K_pneumoniae_3_04210
proX		glycine betaine/L-proline ABC transporter substrate-binding protein ProX	5	5	1	1	8838	8	83		998	998	998	9645baa8bb46fe9f9ffaa8fccfada4b3_2242		7073f0826909e86605b7f24ba93c455b_2354	4d8fdf303c55f8e586b180af2243e275_2388	2900b96dbbdb35d877a57143d080ad95_2214	K_pneumoniae_3_04209
proW		glycine betaine/L-proline ABC transporter permease ProW	5	5	1	1	8839	8	84		1067	1067	1067	9645baa8bb46fe9f9ffaa8fccfada4b3_2244		7073f0826909e86605b7f24ba93c455b_2356	4d8fdf303c55f8e586b180af2243e275_2390	2900b96dbbdb35d877a57143d080ad95_2216	K_pneumoniae_3_04208
proV		glycine betaine/L-proline ABC transporter ATP-binding protein ProV	5	5	1	1	8840	8	85		1202	1202	1202	9645baa8bb46fe9f9ffaa8fccfada4b3_2246		7073f0826909e86605b7f24ba93c455b_2358	4d8fdf303c55f8e586b180af2243e275_2392	2900b96dbbdb35d877a57143d080ad95_2218	K_pneumoniae_3_04207
nrdF		class 1b ribonucleoside-diphosphate reductase subunit beta	5	5	1	1	8841	8	86		962	962	962	9645baa8bb46fe9f9ffaa8fccfada4b3_2248		7073f0826909e86605b7f24ba93c455b_2360	4d8fdf303c55f8e586b180af2243e275_2394	2900b96dbbdb35d877a57143d080ad95_2220	K_pneumoniae_3_04206
nrdE		class 1b ribonucleoside-diphosphate reductase subunit alpha	5	5	1	1	8842	8	87		2141	2141	2141	9645baa8bb46fe9f9ffaa8fccfada4b3_2250		7073f0826909e86605b7f24ba93c455b_2362	4d8fdf303c55f8e586b180af2243e275_2396	2900b96dbbdb35d877a57143d080ad95_2222	K_pneumoniae_3_04205
nrdI		class Ib ribonucleoside-diphosphate reductase assembly flavoprotein NrdI	5	5	1	1	8843	8	88		410	410	410	9645baa8bb46fe9f9ffaa8fccfada4b3_2252		7073f0826909e86605b7f24ba93c455b_2364	4d8fdf303c55f8e586b180af2243e275_2398	2900b96dbbdb35d877a57143d080ad95_2224	K_pneumoniae_3_04204
nrdH		glutaredoxin-like protein NrdH	5	5	1	1	8844	8	89		245	245	245	9645baa8bb46fe9f9ffaa8fccfada4b3_2254		7073f0826909e86605b7f24ba93c455b_2366	4d8fdf303c55f8e586b180af2243e275_2400	2900b96dbbdb35d877a57143d080ad95_2226	K_pneumoniae_3_04203
WP_021312379.1		carboxymuconolactone decarboxylase family protein	5	5	1	1	8845	8	90		431	431	431	9645baa8bb46fe9f9ffaa8fccfada4b3_2256		7073f0826909e86605b7f24ba93c455b_2368	4d8fdf303c55f8e586b180af2243e275_2402	2900b96dbbdb35d877a57143d080ad95_2228	K_pneumoniae_3_04202
WP_004149442.1		PLP-dependent aminotransferase family protein	5	5	1	1	8846	8	91		1352	1352	1352	9645baa8bb46fe9f9ffaa8fccfada4b3_2258		7073f0826909e86605b7f24ba93c455b_2370	4d8fdf303c55f8e586b180af2243e275_2406	2900b96dbbdb35d877a57143d080ad95_2230	K_pneumoniae_3_04201
WP_002914293.1		DUF883 domain-containing protein	5	5	1	1	8847	8	92		347	347	347	9645baa8bb46fe9f9ffaa8fccfada4b3_2260		7073f0826909e86605b7f24ba93c455b_2372	4d8fdf303c55f8e586b180af2243e275_2408	2900b96dbbdb35d877a57143d080ad95_2232	K_pneumoniae_3_04200
WP_002914291.1		DUF2002 family protein	5	5	1	1	8848	8	93		362	362	362	9645baa8bb46fe9f9ffaa8fccfada4b3_2262		7073f0826909e86605b7f24ba93c455b_2374	4d8fdf303c55f8e586b180af2243e275_2410	2900b96dbbdb35d877a57143d080ad95_2234	K_pneumoniae_3_04199
alaE		L-alanine exporter AlaE	5	5	1	1	8849	8	94		449	449	449	9645baa8bb46fe9f9ffaa8fccfada4b3_2264		7073f0826909e86605b7f24ba93c455b_2376	4d8fdf303c55f8e586b180af2243e275_2412	2900b96dbbdb35d877a57143d080ad95_2236	K_pneumoniae_3_04198
stpA		DNA-binding protein StpA	5	5	1	1	8850	8	95		401	401	401	9645baa8bb46fe9f9ffaa8fccfada4b3_2266		7073f0826909e86605b7f24ba93c455b_2378	4d8fdf303c55f8e586b180af2243e275_2414	2900b96dbbdb35d877a57143d080ad95_2238	K_pneumoniae_3_04197
WP_002914284.1		hypothetical protein	5	5	1	1	8851	8	96		179	179	179	9645baa8bb46fe9f9ffaa8fccfada4b3_2268		7073f0826909e86605b7f24ba93c455b_2380	4d8fdf303c55f8e586b180af2243e275_2416	2900b96dbbdb35d877a57143d080ad95_2240	K_pneumoniae_3_04196
lpxO		lipid A hydroxylase LpxO	5	5	1	1	8852	8	97		902	902	902	9645baa8bb46fe9f9ffaa8fccfada4b3_2270		7073f0826909e86605b7f24ba93c455b_2382	4d8fdf303c55f8e586b180af2243e275_2418	2900b96dbbdb35d877a57143d080ad95_2242	K_pneumoniae_3_04195
WP_023301550.1		rhodanese family protein	5	5	1	1	8853	8	98		545	545	545	9645baa8bb46fe9f9ffaa8fccfada4b3_2272		7073f0826909e86605b7f24ba93c455b_2384	4d8fdf303c55f8e586b180af2243e275_2420	2900b96dbbdb35d877a57143d080ad95_2244	K_pneumoniae_3_04194
WP_002914277.1		metalloregulator ArsR/SmtB family transcription factor	5	5	1	1	8854	8	99		299	299	299	9645baa8bb46fe9f9ffaa8fccfada4b3_2274		7073f0826909e86605b7f24ba93c455b_2386	4d8fdf303c55f8e586b180af2243e275_2422	2900b96dbbdb35d877a57143d080ad95_2246	K_pneumoniae_3_04193
WP_004174743.1		NAD(P)H-dependent oxidoreductase	5	5	1	1	8855	8	100		605	605	605	9645baa8bb46fe9f9ffaa8fccfada4b3_2276		7073f0826909e86605b7f24ba93c455b_2388	4d8fdf303c55f8e586b180af2243e275_2424	2900b96dbbdb35d877a57143d080ad95_2248	K_pneumoniae_3_04192
WP_004145715.1		LysR family transcriptional regulator	5	5	1	1	8856	8	101		908	908	908	9645baa8bb46fe9f9ffaa8fccfada4b3_2278		7073f0826909e86605b7f24ba93c455b_2390	4d8fdf303c55f8e586b180af2243e275_2426	2900b96dbbdb35d877a57143d080ad95_2250	K_pneumoniae_3_04191
yiaJ		IclR family transcriptional regulator	5	5	1	1	11792	9	21		92	827	239	9645baa8bb46fe9f9ffaa8fccfada4b3_370		7073f0826909e86605b7f24ba93c455b_357	4d8fdf303c55f8e586b180af2243e275_359	2900b96dbbdb35d877a57143d080ad95_369	K_pneumoniae_3_02504
WP_023301553.1		sigma-54-dependent Fis family transcriptional regulator	5	5	1	1	8857	8	102		1787	1787	1787	9645baa8bb46fe9f9ffaa8fccfada4b3_2280		7073f0826909e86605b7f24ba93c455b_2392	4d8fdf303c55f8e586b180af2243e275_2428	2900b96dbbdb35d877a57143d080ad95_2252	K_pneumoniae_3_04190
WP_004174747.1		aldehyde dehydrogenase	5	5	1	1	8858	8	103		1520	1520	1520	9645baa8bb46fe9f9ffaa8fccfada4b3_2282		7073f0826909e86605b7f24ba93c455b_2394	4d8fdf303c55f8e586b180af2243e275_2430	2900b96dbbdb35d877a57143d080ad95_2254	K_pneumoniae_3_04189
WP_004145710.1		fimbrial protein	5	5	1	1	8859	8	104		581	581	581	9645baa8bb46fe9f9ffaa8fccfada4b3_2284		7073f0826909e86605b7f24ba93c455b_2396	4d8fdf303c55f8e586b180af2243e275_2432	2900b96dbbdb35d877a57143d080ad95_2256	K_pneumoniae_3_04188
WP_004185341.1		molecular chaperone	5	5	1	1	8860	8	106		662	662	662	9645baa8bb46fe9f9ffaa8fccfada4b3_2286		7073f0826909e86605b7f24ba93c455b_2398	4d8fdf303c55f8e586b180af2243e275_2434	2900b96dbbdb35d877a57143d080ad95_2258	K_pneumoniae_3_04187
WP_101986019.1		fimbrial protein	5	5	1	1	8864	8	107		1094	1094	1094	9645baa8bb46fe9f9ffaa8fccfada4b3_2290		7073f0826909e86605b7f24ba93c455b_2402	4d8fdf303c55f8e586b180af2243e275_2438	2900b96dbbdb35d877a57143d080ad95_2262	K_pneumoniae_3_04185
WP_004145700.1		hypothetical protein	5	5	1	1	8870	8	111		620	620	620	9645baa8bb46fe9f9ffaa8fccfada4b3_2298		7073f0826909e86605b7f24ba93c455b_2416	4d8fdf303c55f8e586b180af2243e275_2456	2900b96dbbdb35d877a57143d080ad95_2270	K_pneumoniae_3_04181
WP_032420470.1		glyoxylate/hydroxypyruvate reductase A	5	5	1	1	8872	8	113		932	932	932	9645baa8bb46fe9f9ffaa8fccfada4b3_2302		7073f0826909e86605b7f24ba93c455b_2420	4d8fdf303c55f8e586b180af2243e275_2460	2900b96dbbdb35d877a57143d080ad95_2274	K_pneumoniae_3_04179
WP_004188166.1		protein bax	5	5	1	1	11796	9	17		563	818	767	9645baa8bb46fe9f9ffaa8fccfada4b3_378		7073f0826909e86605b7f24ba93c455b_365	4d8fdf303c55f8e586b180af2243e275_367	2900b96dbbdb35d877a57143d080ad95_377	K_pneumoniae_3_02508
WP_004180964.1		class II aldolase/adducin family protein	5	5	1	1	8873	8	114		728	728	728	9645baa8bb46fe9f9ffaa8fccfada4b3_2304		7073f0826909e86605b7f24ba93c455b_2422	4d8fdf303c55f8e586b180af2243e275_2462	2900b96dbbdb35d877a57143d080ad95_2276	K_pneumoniae_3_04178
btuD_7		amino acid ABC transporter permease/ATP-binding protein	5	5	1	1	8874	8	115		1520	1520	1520	9645baa8bb46fe9f9ffaa8fccfada4b3_2306		7073f0826909e86605b7f24ba93c455b_2424	4d8fdf303c55f8e586b180af2243e275_2464	2900b96dbbdb35d877a57143d080ad95_2278	K_pneumoniae_3_04177
WP_004151025.1		ABC transporter substrate-binding protein	5	5	1	1	8876	8	116		803	803	803	9645baa8bb46fe9f9ffaa8fccfada4b3_2308		7073f0826909e86605b7f24ba93c455b_2426	4d8fdf303c55f8e586b180af2243e275_2466	2900b96dbbdb35d877a57143d080ad95_2280	K_pneumoniae_3_04176
WP_002914200.1		TIM barrel protein	5	5	1	1	8877	8	117		863	863	863	9645baa8bb46fe9f9ffaa8fccfada4b3_2312		7073f0826909e86605b7f24ba93c455b_2430	4d8fdf303c55f8e586b180af2243e275_2470	2900b96dbbdb35d877a57143d080ad95_2284	K_pneumoniae_3_04174
group_1885	speB	agmatinase	5	5	1	1	8878	8	118		950	950	950	9645baa8bb46fe9f9ffaa8fccfada4b3_2314		7073f0826909e86605b7f24ba93c455b_2432	4d8fdf303c55f8e586b180af2243e275_2472	2900b96dbbdb35d877a57143d080ad95_2286	K_pneumoniae_3_04173
WP_002914199.1		LysR family transcriptional regulator	5	5	1	1	8879	8	119		911	911	911	9645baa8bb46fe9f9ffaa8fccfada4b3_2316		7073f0826909e86605b7f24ba93c455b_2434	4d8fdf303c55f8e586b180af2243e275_2474	2900b96dbbdb35d877a57143d080ad95_2288	K_pneumoniae_3_04172
WP_000888203.1		Rrf2 family transcriptional regulator	5	5	1	1	8880	8	120		479	479	479	9645baa8bb46fe9f9ffaa8fccfada4b3_2318		7073f0826909e86605b7f24ba93c455b_2436	4d8fdf303c55f8e586b180af2243e275_2476	2900b96dbbdb35d877a57143d080ad95_2290	K_pneumoniae_3_04171
oqxB		multidrug efflux RND transporter permease subunit OqxB	5	5	1	1	8881	8	121		3152	3152	3152	9645baa8bb46fe9f9ffaa8fccfada4b3_2320		7073f0826909e86605b7f24ba93c455b_2438	4d8fdf303c55f8e586b180af2243e275_2478	2900b96dbbdb35d877a57143d080ad95_2292	K_pneumoniae_3_04170
oqxA		multidrug efflux RND transporter periplasmic adaptor subunit OqxA	5	5	1	1	8882	8	122		1175	1175	1175	9645baa8bb46fe9f9ffaa8fccfada4b3_2322		7073f0826909e86605b7f24ba93c455b_2440	4d8fdf303c55f8e586b180af2243e275_2480	2900b96dbbdb35d877a57143d080ad95_2294	K_pneumoniae_3_04169
WP_020324194.1		hypothetical protein	5	5	1	1	82	62	19		581	644	593	9645baa8bb46fe9f9ffaa8fccfada4b3_434		7073f0826909e86605b7f24ba93c455b_421	4d8fdf303c55f8e586b180af2243e275_428	2900b96dbbdb35d877a57143d080ad95_433	K_pneumoniae_3_02536
WP_004174789.1		flavin reductase	5	5	1	1	8884	8	124		572	572	572	9645baa8bb46fe9f9ffaa8fccfada4b3_2326		7073f0826909e86605b7f24ba93c455b_2444	4d8fdf303c55f8e586b180af2243e275_2484	2900b96dbbdb35d877a57143d080ad95_2298	K_pneumoniae_3_04167
WP_040189681.1		LysR family transcriptional regulator	5	5	1	1	8885	8	125		884	884	884	9645baa8bb46fe9f9ffaa8fccfada4b3_2328		7073f0826909e86605b7f24ba93c455b_2446	4d8fdf303c55f8e586b180af2243e275_2486	2900b96dbbdb35d877a57143d080ad95_2300	K_pneumoniae_3_04166
WP_004180956.1		hypothetical protein	5	5	1	1	8901	8	126		800	800	800	9645baa8bb46fe9f9ffaa8fccfada4b3_2330		7073f0826909e86605b7f24ba93c455b_2448	4d8fdf303c55f8e586b180af2243e275_2488	2900b96dbbdb35d877a57143d080ad95_2302	K_pneumoniae_3_04165
mhpB		3-carboxyethylcatechol 2,3-dioxygenase	5	6	1.2	1	3929				440	944	787	9645baa8bb46fe9f9ffaa8fccfada4b3_4131		7073f0826909e86605b7f24ba93c455b_4324	4d8fdf303c55f8e586b180af2243e275_4521	2900b96dbbdb35d877a57143d080ad95_4443	K_pneumoniae_3_00969 K_pneumoniae_3_00968
dppC		dipeptide ABC transporter permease DppC	5	5	1	1	88	62	2		902	902	902	9645baa8bb46fe9f9ffaa8fccfada4b3_458		7073f0826909e86605b7f24ba93c455b_439	4d8fdf303c55f8e586b180af2243e275_443	2900b96dbbdb35d877a57143d080ad95_451	K_pneumoniae_3_02543
smpB		SsrA-binding protein SmpB	5	5	1	1	8918	8	37		482	482	482	9645baa8bb46fe9f9ffaa8fccfada4b3_2374		7073f0826909e86605b7f24ba93c455b_2453	4d8fdf303c55f8e586b180af2243e275_2517	2900b96dbbdb35d877a57143d080ad95_2323	K_pneumoniae_3_04163
WP_004145682.1		RnfH family protein	5	5	1	1	8916	8	3		290	290	290	9645baa8bb46fe9f9ffaa8fccfada4b3_2378		7073f0826909e86605b7f24ba93c455b_2457	4d8fdf303c55f8e586b180af2243e275_2521	2900b96dbbdb35d877a57143d080ad95_2327	K_pneumoniae_3_04161
bamE		outer membrane protein assembly factor BamE	5	5	1	1	8915	8	2		341	341	341	9645baa8bb46fe9f9ffaa8fccfada4b3_2380		7073f0826909e86605b7f24ba93c455b_2459	4d8fdf303c55f8e586b180af2243e275_2523	2900b96dbbdb35d877a57143d080ad95_2329	K_pneumoniae_3_04160
recN		DNA repair protein RecN	5	5	1	1	8914	8	1		1661	1661	1661	9645baa8bb46fe9f9ffaa8fccfada4b3_2382		7073f0826909e86605b7f24ba93c455b_2461	4d8fdf303c55f8e586b180af2243e275_2525	2900b96dbbdb35d877a57143d080ad95_2331	K_pneumoniae_3_04159
grpE		nucleotide exchange factor GrpE	5	5	1	1	2049	181	3		590	590	590	9645baa8bb46fe9f9ffaa8fccfada4b3_2386		7073f0826909e86605b7f24ba93c455b_2465	4d8fdf303c55f8e586b180af2243e275_2529	2900b96dbbdb35d877a57143d080ad95_2335	K_pneumoniae_3_04157
WP_004149392.1		HlyC/CorC family transporter	5	5	1	1	2047	181	2		1286	1286	1286	9645baa8bb46fe9f9ffaa8fccfada4b3_2388		7073f0826909e86605b7f24ba93c455b_2467	4d8fdf303c55f8e586b180af2243e275_2531	2900b96dbbdb35d877a57143d080ad95_2337	K_pneumoniae_3_04156
WP_002914153.1		inner membrane protein YpjD	5	5	1	1	2048	181	1		791	791	791	9645baa8bb46fe9f9ffaa8fccfada4b3_2390		7073f0826909e86605b7f24ba93c455b_2469	4d8fdf303c55f8e586b180af2243e275_2533	2900b96dbbdb35d877a57143d080ad95_2339	K_pneumoniae_3_04155
rpsP		30S ribosomal protein S16	5	5	1	1	2124	212	2		248	248	248	9645baa8bb46fe9f9ffaa8fccfada4b3_2394		7073f0826909e86605b7f24ba93c455b_2473	4d8fdf303c55f8e586b180af2243e275_2537	2900b96dbbdb35d877a57143d080ad95_2343	K_pneumoniae_3_04153
rimM		ribosome maturation factor RimM	5	5	1	1	2125	212	1		548	548	548	9645baa8bb46fe9f9ffaa8fccfada4b3_2396		7073f0826909e86605b7f24ba93c455b_2475	4d8fdf303c55f8e586b180af2243e275_2539	2900b96dbbdb35d877a57143d080ad95_2345	K_pneumoniae_3_04152
bcsO		cellulose biosynthesis protein BcsO	5	5	1	1	11607	37	28		539	539	539	9645baa8bb46fe9f9ffaa8fccfada4b3_466		7073f0826909e86605b7f24ba93c455b_447	4d8fdf303c55f8e586b180af2243e275_451	2900b96dbbdb35d877a57143d080ad95_459	K_pneumoniae_3_02546
WP_023342645.1		PepSY domain-containing protein	5	5	1	1	2142	46	2		1370	1370	1370	9645baa8bb46fe9f9ffaa8fccfada4b3_2404		7073f0826909e86605b7f24ba93c455b_2483	4d8fdf303c55f8e586b180af2243e275_2547	2900b96dbbdb35d877a57143d080ad95_2353	K_pneumoniae_3_04148
WP_004145671.1		OmpA family protein	5	5	1	1	2143	46	3		482	482	482	9645baa8bb46fe9f9ffaa8fccfada4b3_2406		7073f0826909e86605b7f24ba93c455b_2485	4d8fdf303c55f8e586b180af2243e275_2549	2900b96dbbdb35d877a57143d080ad95_2355	K_pneumoniae_3_04147
dgcN		diguanylate cyclase DgcN	5	5	1	1	2144	46	4		1223	1223	1223	9645baa8bb46fe9f9ffaa8fccfada4b3_2408		7073f0826909e86605b7f24ba93c455b_2487	4d8fdf303c55f8e586b180af2243e275_2551	2900b96dbbdb35d877a57143d080ad95_2357	K_pneumoniae_3_04146
WP_004174804.1		YfiR family protein	5	5	1	1	2145	46	5		509	509	509	9645baa8bb46fe9f9ffaa8fccfada4b3_2410		7073f0826909e86605b7f24ba93c455b_2489	4d8fdf303c55f8e586b180af2243e275_2553	2900b96dbbdb35d877a57143d080ad95_2359	K_pneumoniae_3_04145
aroF		3-deoxy-7-phosphoheptulonate synthase AroF	5	5	1	1	2146	46	6		1070	1070	1070	9645baa8bb46fe9f9ffaa8fccfada4b3_2412		7073f0826909e86605b7f24ba93c455b_2491	4d8fdf303c55f8e586b180af2243e275_2555	2900b96dbbdb35d877a57143d080ad95_2361	K_pneumoniae_3_04144
tyrA		bifunctional chorismate mutase/prephenate dehydrogenase	5	5	1	1	2147	46	7		1121	1121	1121	9645baa8bb46fe9f9ffaa8fccfada4b3_2414		7073f0826909e86605b7f24ba93c455b_2493	4d8fdf303c55f8e586b180af2243e275_2557	2900b96dbbdb35d877a57143d080ad95_2363	K_pneumoniae_3_04143
WP_004174805.1		SMP-30/gluconolactonase/LRE family protein	5	5	1	1	2148	46	8		872	872	872	9645baa8bb46fe9f9ffaa8fccfada4b3_2416		7073f0826909e86605b7f24ba93c455b_2495	4d8fdf303c55f8e586b180af2243e275_2559	2900b96dbbdb35d877a57143d080ad95_2365	K_pneumoniae_3_04142
pheA		bifunctional chorismate mutase/prephenate dehydratase	5	5	1	1	2149	46	9		1160	1160	1160	9645baa8bb46fe9f9ffaa8fccfada4b3_2418		7073f0826909e86605b7f24ba93c455b_2497	4d8fdf303c55f8e586b180af2243e275_2561	2900b96dbbdb35d877a57143d080ad95_2367	K_pneumoniae_3_04141
raiA		ribosome-associated translation inhibitor RaiA	5	5	1	1	2151	46	11		335	335	335	9645baa8bb46fe9f9ffaa8fccfada4b3_2423		7073f0826909e86605b7f24ba93c455b_2502	4d8fdf303c55f8e586b180af2243e275_2566	2900b96dbbdb35d877a57143d080ad95_2372	K_pneumoniae_3_04140
bamD		outer membrane protein assembly factor BamD	5	5	1	1	2153	46	12		737	737	737	9645baa8bb46fe9f9ffaa8fccfada4b3_2425		7073f0826909e86605b7f24ba93c455b_2504	4d8fdf303c55f8e586b180af2243e275_2568	2900b96dbbdb35d877a57143d080ad95_2374	K_pneumoniae_3_04139
WP_004188256.1		iron-containing alcohol dehydrogenase	5	5	1	1	11634	37	6		1148	1193	1157	9645baa8bb46fe9f9ffaa8fccfada4b3_520		7073f0826909e86605b7f24ba93c455b_501	4d8fdf303c55f8e586b180af2243e275_505	2900b96dbbdb35d877a57143d080ad95_513	K_pneumoniae_3_02573
pgeF		polyphenol oxidase	5	5	1	1	2154	46	14		731	731	731	9645baa8bb46fe9f9ffaa8fccfada4b3_2429		7073f0826909e86605b7f24ba93c455b_2508	4d8fdf303c55f8e586b180af2243e275_2572	2900b96dbbdb35d877a57143d080ad95_2378	K_pneumoniae_3_04137
clpB		ATP-dependent chaperone ClpB	5	5	1	1	2155	46	15		2573	2573	2573	9645baa8bb46fe9f9ffaa8fccfada4b3_2431		7073f0826909e86605b7f24ba93c455b_2510	4d8fdf303c55f8e586b180af2243e275_2574	2900b96dbbdb35d877a57143d080ad95_2380	K_pneumoniae_3_04136
WP_004144368.1		MFS transporter	5	5	1	1	2156	46	16		1298	1298	1298	9645baa8bb46fe9f9ffaa8fccfada4b3_2445		7073f0826909e86605b7f24ba93c455b_2524	4d8fdf303c55f8e586b180af2243e275_2588	2900b96dbbdb35d877a57143d080ad95_2394	K_pneumoniae_3_01767
WP_002914095.1		YfiM family lipoprotein	5	5	1	1	2157	46	17		323	323	323	9645baa8bb46fe9f9ffaa8fccfada4b3_2447		7073f0826909e86605b7f24ba93c455b_2526	4d8fdf303c55f8e586b180af2243e275_2590	2900b96dbbdb35d877a57143d080ad95_2396	K_pneumoniae_3_01766
pssA		CDP-diacylglycerol--serine O-phosphatidyltransferase	5	5	1	1	2158	46	18		1355	1355	1355	9645baa8bb46fe9f9ffaa8fccfada4b3_2449		7073f0826909e86605b7f24ba93c455b_2528	4d8fdf303c55f8e586b180af2243e275_2592	2900b96dbbdb35d877a57143d080ad95_2398	K_pneumoniae_3_01765
pat		protein lysine acetyltransferase	5	5	1	1	2159	46	19		2651	2651	2651	9645baa8bb46fe9f9ffaa8fccfada4b3_2451		7073f0826909e86605b7f24ba93c455b_2530	4d8fdf303c55f8e586b180af2243e275_2594	2900b96dbbdb35d877a57143d080ad95_2400	K_pneumoniae_3_01764
tapT		tRNA-uridine aminocarboxypropyltransferase	5	5	1	1	2160	46	20		698	698	698	9645baa8bb46fe9f9ffaa8fccfada4b3_2453		7073f0826909e86605b7f24ba93c455b_2532	4d8fdf303c55f8e586b180af2243e275_2596	2900b96dbbdb35d877a57143d080ad95_2402	K_pneumoniae_3_01763
trxC		thioredoxin TrxC	5	5	1	1	2161	46	21		425	425	425	9645baa8bb46fe9f9ffaa8fccfada4b3_2455		7073f0826909e86605b7f24ba93c455b_2534	4d8fdf303c55f8e586b180af2243e275_2598	2900b96dbbdb35d877a57143d080ad95_2404	K_pneumoniae_3_01762
WP_002914089.1		tRNA/rRNA methyltransferase	5	5	1	1	2162	46	22		1085	1085	1085	9645baa8bb46fe9f9ffaa8fccfada4b3_2457		7073f0826909e86605b7f24ba93c455b_2536	4d8fdf303c55f8e586b180af2243e275_2600	2900b96dbbdb35d877a57143d080ad95_2406	K_pneumoniae_3_01761
ung		uracil-DNA glycosylase	5	5	1	1	2163	46	23		689	689	689	9645baa8bb46fe9f9ffaa8fccfada4b3_2459		7073f0826909e86605b7f24ba93c455b_2538	4d8fdf303c55f8e586b180af2243e275_2602	2900b96dbbdb35d877a57143d080ad95_2408	K_pneumoniae_3_01760
grcA		autonomous glycyl radical cofactor GrcA	5	5	1	1	2164	46	24		383	383	383	9645baa8bb46fe9f9ffaa8fccfada4b3_2461		7073f0826909e86605b7f24ba93c455b_2540	4d8fdf303c55f8e586b180af2243e275_2604	2900b96dbbdb35d877a57143d080ad95_2410	K_pneumoniae_3_01759
srmB		ATP-dependent RNA helicase SrmB	5	5	1	1	2165	46	25		1331	1331	1331	9645baa8bb46fe9f9ffaa8fccfada4b3_2463		7073f0826909e86605b7f24ba93c455b_2542	4d8fdf303c55f8e586b180af2243e275_2606	2900b96dbbdb35d877a57143d080ad95_2412	K_pneumoniae_3_01758
WP_002914079.1		tRNA1(Val) (adenine(37)-N6)-methyltransferase	5	5	1	1	2166	46	26		737	737	737	9645baa8bb46fe9f9ffaa8fccfada4b3_2465		7073f0826909e86605b7f24ba93c455b_2544	4d8fdf303c55f8e586b180af2243e275_2608	2900b96dbbdb35d877a57143d080ad95_2414	K_pneumoniae_3_01757
rseA		anti-sigma-E factor RseA	5	5	1	1	2141	152	1		650	650	650	9645baa8bb46fe9f9ffaa8fccfada4b3_2473		7073f0826909e86605b7f24ba93c455b_2550	4d8fdf303c55f8e586b180af2243e275_2614	2900b96dbbdb35d877a57143d080ad95_2420	K_pneumoniae_3_01754
rseB		sigma-E factor regulatory protein RseB	5	5	1	1	2140	152	2		956	956	956	9645baa8bb46fe9f9ffaa8fccfada4b3_2475		7073f0826909e86605b7f24ba93c455b_2552	4d8fdf303c55f8e586b180af2243e275_2616	2900b96dbbdb35d877a57143d080ad95_2422	K_pneumoniae_3_01753
rseC		SoxR-reducing system protein RseC	5	5	1	1	2139	152	3		479	479	479	9645baa8bb46fe9f9ffaa8fccfada4b3_2477		7073f0826909e86605b7f24ba93c455b_2554	4d8fdf303c55f8e586b180af2243e275_2618	2900b96dbbdb35d877a57143d080ad95_2424	K_pneumoniae_3_01752
lepA		translation elongation factor 4	5	5	1	1	2138	152	4		1799	1799	1799	9645baa8bb46fe9f9ffaa8fccfada4b3_2479		7073f0826909e86605b7f24ba93c455b_2556	4d8fdf303c55f8e586b180af2243e275_2620	2900b96dbbdb35d877a57143d080ad95_2426	K_pneumoniae_3_01751
lepB		signal peptidase I	5	5	1	1	2168	152	5		974	974	974	9645baa8bb46fe9f9ffaa8fccfada4b3_2481		7073f0826909e86605b7f24ba93c455b_2558	4d8fdf303c55f8e586b180af2243e275_2622	2900b96dbbdb35d877a57143d080ad95_2428	K_pneumoniae_3_01750
recO		DNA repair protein RecO	5	5	1	1	3642	94	7		737	737	737	9645baa8bb46fe9f9ffaa8fccfada4b3_2487		7073f0826909e86605b7f24ba93c455b_2564	4d8fdf303c55f8e586b180af2243e275_2628	2900b96dbbdb35d877a57143d080ad95_2434	K_pneumoniae_3_01747
pdxJ		pyridoxine 5'-phosphate synthase	5	5	1	1	3641	94	8		731	731	731	9645baa8bb46fe9f9ffaa8fccfada4b3_2489		7073f0826909e86605b7f24ba93c455b_2566	4d8fdf303c55f8e586b180af2243e275_2630	2900b96dbbdb35d877a57143d080ad95_2436	K_pneumoniae_3_01746
acpS		holo-ACP synthase	5	5	1	1	3640	94	9		380	380	380	9645baa8bb46fe9f9ffaa8fccfada4b3_2491		7073f0826909e86605b7f24ba93c455b_2568	4d8fdf303c55f8e586b180af2243e275_2632	2900b96dbbdb35d877a57143d080ad95_2438	K_pneumoniae_3_01745
WP_004144350.1		YfhL family 4Fe-4S dicluster ferredoxin	5	5	1	1	3639	94	10		260	260	260	9645baa8bb46fe9f9ffaa8fccfada4b3_2493		7073f0826909e86605b7f24ba93c455b_2570	4d8fdf303c55f8e586b180af2243e275_2634	2900b96dbbdb35d877a57143d080ad95_2440	K_pneumoniae_3_01744
WP_004144349.1		MurR/RpiR family transcriptional regulator	5	5	1	1	3638	94	11		848	848	848	9645baa8bb46fe9f9ffaa8fccfada4b3_2495		7073f0826909e86605b7f24ba93c455b_2572	4d8fdf303c55f8e586b180af2243e275_2636	2900b96dbbdb35d877a57143d080ad95_2442	K_pneumoniae_3_01743
tadA		tRNA adenosine(34) deaminase TadA	5	5	1	1	3636	94	6		509	509	509	9645baa8bb46fe9f9ffaa8fccfada4b3_2499		7073f0826909e86605b7f24ba93c455b_2576	4d8fdf303c55f8e586b180af2243e275_2640	2900b96dbbdb35d877a57143d080ad95_2446	K_pneumoniae_3_01741
mltF		membrane-bound lytic murein transglycosylase MltF	5	5	1	1	3635	94	5		1616	1616	1616	9645baa8bb46fe9f9ffaa8fccfada4b3_2501		7073f0826909e86605b7f24ba93c455b_2578	4d8fdf303c55f8e586b180af2243e275_2642	2900b96dbbdb35d877a57143d080ad95_2448	K_pneumoniae_3_01740
purL		phosphoribosylformylglycinamidine synthase	5	5	1	1	3634	94	4		3887	3887	3887	9645baa8bb46fe9f9ffaa8fccfada4b3_2503		7073f0826909e86605b7f24ba93c455b_2580	4d8fdf303c55f8e586b180af2243e275_2644	2900b96dbbdb35d877a57143d080ad95_2450	K_pneumoniae_3_01739
WP_002914044.1		HAMP domain-containing histidine kinase	5	5	1	1	3633	94	3		1421	1421	1421	9645baa8bb46fe9f9ffaa8fccfada4b3_2505		7073f0826909e86605b7f24ba93c455b_2582	4d8fdf303c55f8e586b180af2243e275_2646	2900b96dbbdb35d877a57143d080ad95_2452	K_pneumoniae_3_01738
qseG		two-component system QseEF-associated lipoprotein QseG	5	5	1	1	3632	94	2		686	686	686	9645baa8bb46fe9f9ffaa8fccfada4b3_2507		7073f0826909e86605b7f24ba93c455b_2584	4d8fdf303c55f8e586b180af2243e275_2648	2900b96dbbdb35d877a57143d080ad95_2454	K_pneumoniae_3_01737
WP_016529349.1		NAD(P)/FAD-dependent oxidoreductase	5	5	1	1	11601	38	3		1148	1193	1184	9645baa8bb46fe9f9ffaa8fccfada4b3_542		7073f0826909e86605b7f24ba93c455b_523	4d8fdf303c55f8e586b180af2243e275_527	2900b96dbbdb35d877a57143d080ad95_535	K_pneumoniae_3_02584
glrR		two-component system response regulator GlrR	5	5	1	1	3631	94	1		1337	1337	1337	9645baa8bb46fe9f9ffaa8fccfada4b3_2509		7073f0826909e86605b7f24ba93c455b_2586	4d8fdf303c55f8e586b180af2243e275_2650	2900b96dbbdb35d877a57143d080ad95_2456	K_pneumoniae_3_01736
hmpA		NO-inducible flavohemoprotein	5	5	1	1	3630	83	2		1190	1190	1190	9645baa8bb46fe9f9ffaa8fccfada4b3_2513		7073f0826909e86605b7f24ba93c455b_2590	4d8fdf303c55f8e586b180af2243e275_2654	2900b96dbbdb35d877a57143d080ad95_2460	K_pneumoniae_3_01734
WP_002914027.1		serine hydroxymethyltransferase	5	5	1	1	3629	83	3		1253	1253	1253	9645baa8bb46fe9f9ffaa8fccfada4b3_2515		7073f0826909e86605b7f24ba93c455b_2592	4d8fdf303c55f8e586b180af2243e275_2656	2900b96dbbdb35d877a57143d080ad95_2462	K_pneumoniae_3_01733
WP_004174823.1		ROK family transcriptional regulator	5	5	1	1	3676	83	5		1196	1196	1196	9645baa8bb46fe9f9ffaa8fccfada4b3_2519		7073f0826909e86605b7f24ba93c455b_2596	4d8fdf303c55f8e586b180af2243e275_2660	2900b96dbbdb35d877a57143d080ad95_2466	K_pneumoniae_3_01731
WP_048255000.1		DUF5107 domain-containing protein	5	5	1	1	3677	83	6		3275	3275	3275	9645baa8bb46fe9f9ffaa8fccfada4b3_2521		7073f0826909e86605b7f24ba93c455b_2598	4d8fdf303c55f8e586b180af2243e275_2662	2900b96dbbdb35d877a57143d080ad95_2468	K_pneumoniae_3_01730
hcaT		3-phenylpropionate MFS transporter	5	5	1	1	3680	83	8		1136	1136	1136	9645baa8bb46fe9f9ffaa8fccfada4b3_2527		7073f0826909e86605b7f24ba93c455b_2604	4d8fdf303c55f8e586b180af2243e275_2668	2900b96dbbdb35d877a57143d080ad95_2474	K_pneumoniae_3_01727
csiE		stationary phase inducible protein CsiE	5	5	1	1	3681	83	9		1277	1277	1277	9645baa8bb46fe9f9ffaa8fccfada4b3_2529		7073f0826909e86605b7f24ba93c455b_2606	4d8fdf303c55f8e586b180af2243e275_2670	2900b96dbbdb35d877a57143d080ad95_2476	K_pneumoniae_3_01726
WP_004151988.1		DUF1007 family protein	5	5	1	1	3682	83	10		638	638	638	9645baa8bb46fe9f9ffaa8fccfada4b3_2531		7073f0826909e86605b7f24ba93c455b_2608	4d8fdf303c55f8e586b180af2243e275_2672	2900b96dbbdb35d877a57143d080ad95_2478	K_pneumoniae_3_01725
WP_004185122.1		nickel/cobalt transporter	5	5	1	1	3683	83	11		980	980	980	9645baa8bb46fe9f9ffaa8fccfada4b3_2533		7073f0826909e86605b7f24ba93c455b_2610	4d8fdf303c55f8e586b180af2243e275_2674	2900b96dbbdb35d877a57143d080ad95_2480	K_pneumoniae_3_01724
nikE		nickel import ATP-binding protein NikE	5	5	1	1	11513	38	31		791	791	791	9645baa8bb46fe9f9ffaa8fccfada4b3_550		7073f0826909e86605b7f24ba93c455b_530	4d8fdf303c55f8e586b180af2243e275_535	2900b96dbbdb35d877a57143d080ad95_541	K_pneumoniae_3_02587
WP_021440564.1		hypothetical protein	5	5	1	1	3684	83	16		836	836	836	9645baa8bb46fe9f9ffaa8fccfada4b3_2535		7073f0826909e86605b7f24ba93c455b_2612	4d8fdf303c55f8e586b180af2243e275_2676	2900b96dbbdb35d877a57143d080ad95_2482	K_pneumoniae_3_01723
suhB		inositol-1-monophosphatase	5	5	1	1	3685	83	15		803	803	803	9645baa8bb46fe9f9ffaa8fccfada4b3_2537		7073f0826909e86605b7f24ba93c455b_2614	4d8fdf303c55f8e586b180af2243e275_2678	2900b96dbbdb35d877a57143d080ad95_2484	K_pneumoniae_3_01722
trmJ		tRNA (cytosine(32)/uridine(32)-2'-O)-methyltransferase TrmJ	5	5	1	1	3686	83	14		734	734	734	9645baa8bb46fe9f9ffaa8fccfada4b3_2539		7073f0826909e86605b7f24ba93c455b_2616	4d8fdf303c55f8e586b180af2243e275_2680	2900b96dbbdb35d877a57143d080ad95_2486	K_pneumoniae_3_01721
iscR		Fe-S cluster assembly transcriptional regulator IscR	5	5	1	1	3687	83	13		491	491	491	9645baa8bb46fe9f9ffaa8fccfada4b3_2541		7073f0826909e86605b7f24ba93c455b_2618	4d8fdf303c55f8e586b180af2243e275_2682	2900b96dbbdb35d877a57143d080ad95_2488	K_pneumoniae_3_01720
iscS		cysteine desulfurase	5	5	1	1	3688	83	12		1214	1214	1214	9645baa8bb46fe9f9ffaa8fccfada4b3_2543		7073f0826909e86605b7f24ba93c455b_2620	4d8fdf303c55f8e586b180af2243e275_2684	2900b96dbbdb35d877a57143d080ad95_2490	K_pneumoniae_3_01719
iscA		iron-sulfur cluster assembly protein IscA	5	5	1	1	3628	103	1		323	323	323	9645baa8bb46fe9f9ffaa8fccfada4b3_2547		7073f0826909e86605b7f24ba93c455b_2624	4d8fdf303c55f8e586b180af2243e275_2688	2900b96dbbdb35d877a57143d080ad95_2494	K_pneumoniae_3_01717
hscB		co-chaperone HscB	5	5	1	1	3627	103	2		515	515	515	9645baa8bb46fe9f9ffaa8fccfada4b3_2549		7073f0826909e86605b7f24ba93c455b_2626	4d8fdf303c55f8e586b180af2243e275_2690	2900b96dbbdb35d877a57143d080ad95_2496	K_pneumoniae_3_01716
hscA		Fe-S protein assembly chaperone HscA	5	5	1	1	3626	103	3		1850	1850	1850	9645baa8bb46fe9f9ffaa8fccfada4b3_2551		7073f0826909e86605b7f24ba93c455b_2628	4d8fdf303c55f8e586b180af2243e275_2692	2900b96dbbdb35d877a57143d080ad95_2498	K_pneumoniae_3_01715
fdx		ISC system 2Fe-2S type ferredoxin	5	5	1	1	3625	103	4		335	335	335	9645baa8bb46fe9f9ffaa8fccfada4b3_2553		7073f0826909e86605b7f24ba93c455b_2630	4d8fdf303c55f8e586b180af2243e275_2694	2900b96dbbdb35d877a57143d080ad95_2500	K_pneumoniae_3_01714
iscX		Fe-S cluster assembly protein IscX	5	5	1	1	3624	103	5		200	200	200	9645baa8bb46fe9f9ffaa8fccfada4b3_2555		7073f0826909e86605b7f24ba93c455b_2632	4d8fdf303c55f8e586b180af2243e275_2696	2900b96dbbdb35d877a57143d080ad95_2502	K_pneumoniae_3_01713
pepB		aminopeptidase PepB	5	5	1	1	3623	103	6		1286	1286	1286	9645baa8bb46fe9f9ffaa8fccfada4b3_2557		7073f0826909e86605b7f24ba93c455b_2634	4d8fdf303c55f8e586b180af2243e275_2698	2900b96dbbdb35d877a57143d080ad95_2504	K_pneumoniae_3_01712
sseB		enhanced serine sensitivity protein SseB	5	5	1	1	3622	103	7		776	776	776	9645baa8bb46fe9f9ffaa8fccfada4b3_2559		7073f0826909e86605b7f24ba93c455b_2636	4d8fdf303c55f8e586b180af2243e275_2700	2900b96dbbdb35d877a57143d080ad95_2506	K_pneumoniae_3_01711
WP_004174837.1		hypothetical protein	5	5	1	1	3621	103	8		842	842	842	9645baa8bb46fe9f9ffaa8fccfada4b3_2561		7073f0826909e86605b7f24ba93c455b_2638	4d8fdf303c55f8e586b180af2243e275_2702	2900b96dbbdb35d877a57143d080ad95_2508	K_pneumoniae_3_01710
sseA		3-mercaptopyruvate sulfurtransferase	5	5	1	1	3618	103	11		857	857	857	9645baa8bb46fe9f9ffaa8fccfada4b3_2563		7073f0826909e86605b7f24ba93c455b_2640	4d8fdf303c55f8e586b180af2243e275_2704	2900b96dbbdb35d877a57143d080ad95_2510	K_pneumoniae_3_01709
WP_040181759.1		alpha-2-macroglobulin family protein	5	5	1	1	3619	103	10		4949	4949	4949	9645baa8bb46fe9f9ffaa8fccfada4b3_2565		7073f0826909e86605b7f24ba93c455b_2642	4d8fdf303c55f8e586b180af2243e275_2706	2900b96dbbdb35d877a57143d080ad95_2512	K_pneumoniae_3_01708
WP_002913894.1		bifunctional tRNA (adenosine(37)-C2)-methyltransferase TrmG/ribosomal RNA large subunit methyltransferase RlmN	5	5	1	1	3701	206	2		1166	1166	1166	9645baa8bb46fe9f9ffaa8fccfada4b3_2571		7073f0826909e86605b7f24ba93c455b_2648	4d8fdf303c55f8e586b180af2243e275_2712	2900b96dbbdb35d877a57143d080ad95_2518	K_pneumoniae_3_01705
rodZ		cytoskeleton protein RodZ	5	5	1	1	3617	206	1		995	995	995	9645baa8bb46fe9f9ffaa8fccfada4b3_2573		7073f0826909e86605b7f24ba93c455b_2650	4d8fdf303c55f8e586b180af2243e275_2714	2900b96dbbdb35d877a57143d080ad95_2520	K_pneumoniae_3_01704
hisS		histidine--tRNA ligase	5	5	1	1	3705	125	1		1274	1274	1274	9645baa8bb46fe9f9ffaa8fccfada4b3_2577		7073f0826909e86605b7f24ba93c455b_2654	4d8fdf303c55f8e586b180af2243e275_2718	2900b96dbbdb35d877a57143d080ad95_2524	K_pneumoniae_3_01702
WP_002913890.1		YfgM family protein	5	5	1	1	3609	125	2		620	620	620	9645baa8bb46fe9f9ffaa8fccfada4b3_2579		7073f0826909e86605b7f24ba93c455b_2656	4d8fdf303c55f8e586b180af2243e275_2720	2900b96dbbdb35d877a57143d080ad95_2526	K_pneumoniae_3_01701
bamB		outer membrane protein assembly factor BamB	5	5	1	1	3610	125	9		1178	1178	1178	9645baa8bb46fe9f9ffaa8fccfada4b3_2581		7073f0826909e86605b7f24ba93c455b_2658	4d8fdf303c55f8e586b180af2243e275_2722	2900b96dbbdb35d877a57143d080ad95_2528	K_pneumoniae_3_01700
der		ribosome biogenesis GTPase Der	5	5	1	1	3611	125	8		1478	1478	1478	9645baa8bb46fe9f9ffaa8fccfada4b3_2583		7073f0826909e86605b7f24ba93c455b_2660	4d8fdf303c55f8e586b180af2243e275_2724	2900b96dbbdb35d877a57143d080ad95_2530	K_pneumoniae_3_01699
xseA		exodeoxyribonuclease VII large subunit	5	5	1	1	3616	125	3		1391	1391	1391	9645baa8bb46fe9f9ffaa8fccfada4b3_2593		7073f0826909e86605b7f24ba93c455b_2670	4d8fdf303c55f8e586b180af2243e275_2730	2900b96dbbdb35d877a57143d080ad95_2536	K_pneumoniae_3_01696
WP_192906279.1		sulfatase-like hydrolase/transferase	5	5	1	1	3738	54	17		1868	1868	1868	9645baa8bb46fe9f9ffaa8fccfada4b3_2599		7073f0826909e86605b7f24ba93c455b_2676	4d8fdf303c55f8e586b180af2243e275_2768	2900b96dbbdb35d877a57143d080ad95_2542	K_pneumoniae_3_01693
WP_032420348.1		MFS transporter	5	5	1	1	3723	54	20		1232	1232	1232	9645baa8bb46fe9f9ffaa8fccfada4b3_2603		7073f0826909e86605b7f24ba93c455b_2680	4d8fdf303c55f8e586b180af2243e275_2772	2900b96dbbdb35d877a57143d080ad95_2546	K_pneumoniae_3_01690
WP_004174861.1		DUF2633 family protein	5	5	1	1	3720	54	22		173	173	173	9645baa8bb46fe9f9ffaa8fccfada4b3_2607		7073f0826909e86605b7f24ba93c455b_2684	4d8fdf303c55f8e586b180af2243e275_2776	2900b96dbbdb35d877a57143d080ad95_2550	K_pneumoniae_3_01688
ppx		exopolyphosphatase	5	5	1	1	3718	54	37		1532	1532	1532	9645baa8bb46fe9f9ffaa8fccfada4b3_2611		7073f0826909e86605b7f24ba93c455b_2688	4d8fdf303c55f8e586b180af2243e275_2780	2900b96dbbdb35d877a57143d080ad95_2554	K_pneumoniae_3_01686
ppk1		polyphosphate kinase 1	5	5	1	1	3717	54	36		2060	2060	2060	9645baa8bb46fe9f9ffaa8fccfada4b3_2613		7073f0826909e86605b7f24ba93c455b_2690	4d8fdf303c55f8e586b180af2243e275_2782	2900b96dbbdb35d877a57143d080ad95_2556	K_pneumoniae_3_01685
purN		phosphoribosylglycinamide formyltransferase	5	5	1	1	3716	54	35		641	641	641	9645baa8bb46fe9f9ffaa8fccfada4b3_2615		7073f0826909e86605b7f24ba93c455b_2692	4d8fdf303c55f8e586b180af2243e275_2784	2900b96dbbdb35d877a57143d080ad95_2558	K_pneumoniae_3_01684
purM		phosphoribosylformylglycinamidine cyclo-ligase	5	5	1	1	3781	54	34		1037	1037	1037	9645baa8bb46fe9f9ffaa8fccfada4b3_2617		7073f0826909e86605b7f24ba93c455b_2694	4d8fdf303c55f8e586b180af2243e275_2786	2900b96dbbdb35d877a57143d080ad95_2560	K_pneumoniae_3_01683
WP_040165279.1		MFS transporter	5	7	1.4	1	4576				404	1532	1079	9645baa8bb46fe9f9ffaa8fccfada4b3_4305 9645baa8bb46fe9f9ffaa8fccfada4b3_4307 9645baa8bb46fe9f9ffaa8fccfada4b3_4309		7073f0826909e86605b7f24ba93c455b_4518	4d8fdf303c55f8e586b180af2243e275_4683	2900b96dbbdb35d877a57143d080ad95_4629	K_pneumoniae_3_03798
WP_239593692.1		DUF1062 domain-containing protein	5	5	1	1	4298	7	25		587	614	592	9645baa8bb46fe9f9ffaa8fccfada4b3_4181		7073f0826909e86605b7f24ba93c455b_4374	4d8fdf303c55f8e586b180af2243e275_4571	2900b96dbbdb35d877a57143d080ad95_4493	K_pneumoniae_3_00943
WP_002913833.1		ROK family protein	5	5	1	1	3782	54	33		893	893	893	9645baa8bb46fe9f9ffaa8fccfada4b3_2619		7073f0826909e86605b7f24ba93c455b_2696	4d8fdf303c55f8e586b180af2243e275_2788	2900b96dbbdb35d877a57143d080ad95_2562	K_pneumoniae_3_01682
WP_004174870.1		6-phospho-beta-glucosidase	5	5	1	1	3783	54	32		1433	1433	1433	9645baa8bb46fe9f9ffaa8fccfada4b3_2621		7073f0826909e86605b7f24ba93c455b_2698	4d8fdf303c55f8e586b180af2243e275_2790	2900b96dbbdb35d877a57143d080ad95_2564	K_pneumoniae_3_01681
upp		uracil phosphoribosyltransferase	5	5	1	1	3784	54	31		626	626	626	9645baa8bb46fe9f9ffaa8fccfada4b3_2623		7073f0826909e86605b7f24ba93c455b_2700	4d8fdf303c55f8e586b180af2243e275_2792	2900b96dbbdb35d877a57143d080ad95_2566	K_pneumoniae_3_01680
uraA		uracil permease	5	5	1	1	3785	54	30		1286	1286	1286	9645baa8bb46fe9f9ffaa8fccfada4b3_2625		7073f0826909e86605b7f24ba93c455b_2702	4d8fdf303c55f8e586b180af2243e275_2794	2900b96dbbdb35d877a57143d080ad95_2568	K_pneumoniae_3_01679
arsC		arsenate reductase (glutaredoxin)	5	5	1	1	3788	54	27		359	359	359	9645baa8bb46fe9f9ffaa8fccfada4b3_2631		7073f0826909e86605b7f24ba93c455b_2708	4d8fdf303c55f8e586b180af2243e275_2800	2900b96dbbdb35d877a57143d080ad95_2574	K_pneumoniae_3_01676
bepA		beta-barrel assembly-enhancing protease	5	5	1	1	3789	54	26		1463	1463	1463	9645baa8bb46fe9f9ffaa8fccfada4b3_2633		7073f0826909e86605b7f24ba93c455b_2710	4d8fdf303c55f8e586b180af2243e275_2802	2900b96dbbdb35d877a57143d080ad95_2576	K_pneumoniae_3_01675
WP_002913806.1		AI-2E family transporter	5	5	1	1	3791	54	24		1061	1061	1061	9645baa8bb46fe9f9ffaa8fccfada4b3_2637		7073f0826909e86605b7f24ba93c455b_2714	4d8fdf303c55f8e586b180af2243e275_2806	2900b96dbbdb35d877a57143d080ad95_2580	K_pneumoniae_3_01674
WP_002913804.1		glycine cleavage system transcriptional repressor	5	5	1	1	3780	55	2		566	566	566	9645baa8bb46fe9f9ffaa8fccfada4b3_2641		7073f0826909e86605b7f24ba93c455b_2718	4d8fdf303c55f8e586b180af2243e275_2810	2900b96dbbdb35d877a57143d080ad95_2584	K_pneumoniae_3_01672
dapA		4-hydroxy-tetrahydrodipicolinate synthase	5	5	1	1	3779	55	3		878	878	878	9645baa8bb46fe9f9ffaa8fccfada4b3_2643		7073f0826909e86605b7f24ba93c455b_2720	4d8fdf303c55f8e586b180af2243e275_2812	2900b96dbbdb35d877a57143d080ad95_2586	K_pneumoniae_3_01671
bamC		outer membrane protein assembly factor BamC	5	5	1	1	3778	55	4		1034	1034	1034	9645baa8bb46fe9f9ffaa8fccfada4b3_2645		7073f0826909e86605b7f24ba93c455b_2722	4d8fdf303c55f8e586b180af2243e275_2814	2900b96dbbdb35d877a57143d080ad95_2588	K_pneumoniae_3_01670
WP_002913801.1		phosphoribosylaminoimidazolesuccinocarboxamide synthase	5	5	1	1	3777	55	5		713	713	713	9645baa8bb46fe9f9ffaa8fccfada4b3_2647		7073f0826909e86605b7f24ba93c455b_2724	4d8fdf303c55f8e586b180af2243e275_2816	2900b96dbbdb35d877a57143d080ad95_2590	K_pneumoniae_3_01669
WP_002913800.1		neutral zinc metallopeptidase	5	5	1	1	3776	55	6		875	875	875	9645baa8bb46fe9f9ffaa8fccfada4b3_2649		7073f0826909e86605b7f24ba93c455b_2726	4d8fdf303c55f8e586b180af2243e275_2818	2900b96dbbdb35d877a57143d080ad95_2592	K_pneumoniae_3_01668
tmcA		GNAT family N-acetyltransferase	5	5	1	1	3775	55	7		2003	2003	2003	9645baa8bb46fe9f9ffaa8fccfada4b3_2651		7073f0826909e86605b7f24ba93c455b_2728	4d8fdf303c55f8e586b180af2243e275_2820	2900b96dbbdb35d877a57143d080ad95_2594	K_pneumoniae_3_01667
ypfH		esterase	5	5	1	1	3774	55	8		695	695	695	9645baa8bb46fe9f9ffaa8fccfada4b3_2653		7073f0826909e86605b7f24ba93c455b_2730	4d8fdf303c55f8e586b180af2243e275_2822	2900b96dbbdb35d877a57143d080ad95_2596	K_pneumoniae_3_01666
dapE		succinyl-diaminopimelate desuccinylase	5	5	1	1	3772	55	10		1127	1127	1127	9645baa8bb46fe9f9ffaa8fccfada4b3_2657		7073f0826909e86605b7f24ba93c455b_2734	4d8fdf303c55f8e586b180af2243e275_2826	2900b96dbbdb35d877a57143d080ad95_2600	K_pneumoniae_3_01664
WP_002913764.1		ArsC family reductase	5	5	1	1	3771	55	11		353	353	353	9645baa8bb46fe9f9ffaa8fccfada4b3_2659		7073f0826909e86605b7f24ba93c455b_2736	4d8fdf303c55f8e586b180af2243e275_2828	2900b96dbbdb35d877a57143d080ad95_2602	K_pneumoniae_3_01663
acrD		multidrug efflux RND transporter permease AcrD	5	5	1	1	3769	55	13		3113	3113	3113	9645baa8bb46fe9f9ffaa8fccfada4b3_2663		7073f0826909e86605b7f24ba93c455b_2740	4d8fdf303c55f8e586b180af2243e275_2832	2900b96dbbdb35d877a57143d080ad95_2606	K_pneumoniae_3_01662
aegA		formate-dependent uric acid utilization protein AegA	5	5	1	1	3768	55	14		1982	1982	1982	9645baa8bb46fe9f9ffaa8fccfada4b3_2665		7073f0826909e86605b7f24ba93c455b_2742	4d8fdf303c55f8e586b180af2243e275_2834	2900b96dbbdb35d877a57143d080ad95_2608	K_pneumoniae_3_01661
WP_004188304.1		polymer-forming cytoskeletal protein	5	5	1	1	10087	80	16		653	653	653	9645baa8bb46fe9f9ffaa8fccfada4b3_646		7073f0826909e86605b7f24ba93c455b_626	4d8fdf303c55f8e586b180af2243e275_631	2900b96dbbdb35d877a57143d080ad95_637	K_pneumoniae_3_02635
nudK		GDP-mannose pyrophosphatase NudK	5	5	1	1	3767	55	15		596	596	596	9645baa8bb46fe9f9ffaa8fccfada4b3_2667		7073f0826909e86605b7f24ba93c455b_2744	4d8fdf303c55f8e586b180af2243e275_2836	2900b96dbbdb35d877a57143d080ad95_2610	K_pneumoniae_3_01660
WP_004149270.1		DUF1176 domain-containing protein	5	5	1	1	3766	55	16		1046	1046	1046	9645baa8bb46fe9f9ffaa8fccfada4b3_2669		7073f0826909e86605b7f24ba93c455b_2746	4d8fdf303c55f8e586b180af2243e275_2838	2900b96dbbdb35d877a57143d080ad95_2612	K_pneumoniae_3_01659
group_2022	tkt	transketolase	5	5	1	1	3765	55	17		1994	1994	1994	9645baa8bb46fe9f9ffaa8fccfada4b3_2671		7073f0826909e86605b7f24ba93c455b_2748	4d8fdf303c55f8e586b180af2243e275_2840	2900b96dbbdb35d877a57143d080ad95_2614	K_pneumoniae_3_01658
maeB		NADP-dependent oxaloacetate-decarboxylating malate dehydrogenase	5	5	1	1	3763	55	18		2279	2279	2279	9645baa8bb46fe9f9ffaa8fccfada4b3_2675		7073f0826909e86605b7f24ba93c455b_2752	4d8fdf303c55f8e586b180af2243e275_2844	2900b96dbbdb35d877a57143d080ad95_2618	K_pneumoniae_3_01656
eutS		ethanolamine utilization microcompartment protein EutS	5	5	1	1	3762	55	19		335	335	335	9645baa8bb46fe9f9ffaa8fccfada4b3_2677		7073f0826909e86605b7f24ba93c455b_2754	4d8fdf303c55f8e586b180af2243e275_2846	2900b96dbbdb35d877a57143d080ad95_2620	K_pneumoniae_3_01655
eutP		ethanolamine utilization acetate kinase EutP	5	5	1	1	3761	55	20		479	479	479	9645baa8bb46fe9f9ffaa8fccfada4b3_2679		7073f0826909e86605b7f24ba93c455b_2756	4d8fdf303c55f8e586b180af2243e275_2848	2900b96dbbdb35d877a57143d080ad95_2622	K_pneumoniae_3_01654
eutQ		ethanolamine utilization acetate kinase EutQ	5	5	1	1	3760	55	21		689	689	689	9645baa8bb46fe9f9ffaa8fccfada4b3_2681		7073f0826909e86605b7f24ba93c455b_2758	4d8fdf303c55f8e586b180af2243e275_2850	2900b96dbbdb35d877a57143d080ad95_2624	K_pneumoniae_3_01653
eutT		ethanolamine utilization cob(I)yrinic acid a,c-diamide adenosyltransferase EutT	5	5	1	1	3759	55	22		806	806	806	9645baa8bb46fe9f9ffaa8fccfada4b3_2683		7073f0826909e86605b7f24ba93c455b_2760	4d8fdf303c55f8e586b180af2243e275_2852	2900b96dbbdb35d877a57143d080ad95_2626	K_pneumoniae_3_01652
group_2029	pta	phosphate acetyltransferase	5	5	1	1	3758	55	23		1016	1016	1016	9645baa8bb46fe9f9ffaa8fccfada4b3_2685		7073f0826909e86605b7f24ba93c455b_2762	4d8fdf303c55f8e586b180af2243e275_2854	2900b96dbbdb35d877a57143d080ad95_2628	K_pneumoniae_3_01651
eutN		ethanolamine utilization microcompartment protein EutN	5	5	1	1	3608	69	17		287	287	287	9645baa8bb46fe9f9ffaa8fccfada4b3_2689		7073f0826909e86605b7f24ba93c455b_2766	4d8fdf303c55f8e586b180af2243e275_2858	2900b96dbbdb35d877a57143d080ad95_2632	K_pneumoniae_3_01649
WP_004152003.1		aldehyde dehydrogenase EutE	5	5	1	1	3607	69	18		1403	1403	1403	9645baa8bb46fe9f9ffaa8fccfada4b3_2691		7073f0826909e86605b7f24ba93c455b_2768	4d8fdf303c55f8e586b180af2243e275_2860	2900b96dbbdb35d877a57143d080ad95_2634	K_pneumoniae_3_01648
eutJ		ethanolamine utilization protein EutJ	5	5	1	1	3606	69	16		839	839	839	9645baa8bb46fe9f9ffaa8fccfada4b3_2693		7073f0826909e86605b7f24ba93c455b_2770	4d8fdf303c55f8e586b180af2243e275_2862	2900b96dbbdb35d877a57143d080ad95_2636	K_pneumoniae_3_01647
eutG		ethanolamine utilization ethanol dehydrogenase EutG	5	5	1	1	3605	69	15		1187	1187	1187	9645baa8bb46fe9f9ffaa8fccfada4b3_2695		7073f0826909e86605b7f24ba93c455b_2772	4d8fdf303c55f8e586b180af2243e275_2864	2900b96dbbdb35d877a57143d080ad95_2638	K_pneumoniae_3_01646
eutH		ethanolamine utilization protein EutH	5	5	1	1	3604	69	14		1232	1232	1232	9645baa8bb46fe9f9ffaa8fccfada4b3_2697		7073f0826909e86605b7f24ba93c455b_2774	4d8fdf303c55f8e586b180af2243e275_2866	2900b96dbbdb35d877a57143d080ad95_2640	K_pneumoniae_3_01645
eutA		ethanolamine ammonia-lyase reactivating factor EutA	5	5	1	1	3603	69	13		1403	1403	1403	9645baa8bb46fe9f9ffaa8fccfada4b3_2699		7073f0826909e86605b7f24ba93c455b_2776	4d8fdf303c55f8e586b180af2243e275_2868	2900b96dbbdb35d877a57143d080ad95_2642	K_pneumoniae_3_01644
eutB		ethanolamine ammonia-lyase subunit alpha	5	5	1	1	3602	69	12		1361	1361	1361	9645baa8bb46fe9f9ffaa8fccfada4b3_2701		7073f0826909e86605b7f24ba93c455b_2778	4d8fdf303c55f8e586b180af2243e275_2870	2900b96dbbdb35d877a57143d080ad95_2644	K_pneumoniae_3_01643
eutC		ethanolamine ammonia-lyase subunit EutC	5	5	1	1	3601	69	11		899	899	899	9645baa8bb46fe9f9ffaa8fccfada4b3_2703		7073f0826909e86605b7f24ba93c455b_2780	4d8fdf303c55f8e586b180af2243e275_2872	2900b96dbbdb35d877a57143d080ad95_2646	K_pneumoniae_3_01642
eutL		ethanolamine utilization microcompartment protein EutL	5	5	1	1	3600	69	10		659	659	659	9645baa8bb46fe9f9ffaa8fccfada4b3_2705		7073f0826909e86605b7f24ba93c455b_2782	4d8fdf303c55f8e586b180af2243e275_2874	2900b96dbbdb35d877a57143d080ad95_2648	K_pneumoniae_3_01641
eutK		ethanolamine utilization microcompartment protein EutK	5	5	1	1	3599	69	9		485	485	485	9645baa8bb46fe9f9ffaa8fccfada4b3_2707		7073f0826909e86605b7f24ba93c455b_2784	4d8fdf303c55f8e586b180af2243e275_2876	2900b96dbbdb35d877a57143d080ad95_2650	K_pneumoniae_3_01640
eutR		HTH-type transcriptional regulator EutR	5	5	1	1	3598	69	8		1052	1052	1052	9645baa8bb46fe9f9ffaa8fccfada4b3_2709		7073f0826909e86605b7f24ba93c455b_2786	4d8fdf303c55f8e586b180af2243e275_2878	2900b96dbbdb35d877a57143d080ad95_2652	K_pneumoniae_3_01639
hemF		oxygen-dependent coproporphyrinogen oxidase	5	5	1	1	3597	69	7		899	899	899	9645baa8bb46fe9f9ffaa8fccfada4b3_2711		7073f0826909e86605b7f24ba93c455b_2788	4d8fdf303c55f8e586b180af2243e275_2880	2900b96dbbdb35d877a57143d080ad95_2654	K_pneumoniae_3_01638
amiA		N-acetylmuramoyl-L-alanine amidase AmiA	5	5	1	1	3596	69	6		872	872	872	9645baa8bb46fe9f9ffaa8fccfada4b3_2713		7073f0826909e86605b7f24ba93c455b_2790	4d8fdf303c55f8e586b180af2243e275_2882	2900b96dbbdb35d877a57143d080ad95_2656	K_pneumoniae_3_01637
WP_002913637.1		GNAT family acetyltransferase	5	5	1	1	3591	69	5		425	425	425	9645baa8bb46fe9f9ffaa8fccfada4b3_2715		7073f0826909e86605b7f24ba93c455b_2792	4d8fdf303c55f8e586b180af2243e275_2884	2900b96dbbdb35d877a57143d080ad95_2658	K_pneumoniae_3_01636
WP_002913635.1		DUF2919 domain-containing protein	5	5	1	1	3592	69	4		449	449	449	9645baa8bb46fe9f9ffaa8fccfada4b3_2717		7073f0826909e86605b7f24ba93c455b_2794	4d8fdf303c55f8e586b180af2243e275_2886	2900b96dbbdb35d877a57143d080ad95_2660	K_pneumoniae_3_01635
WP_002913630.1		RpoE-regulated lipoprotein	5	5	1	1	3593	69	3		575	575	575	9645baa8bb46fe9f9ffaa8fccfada4b3_2719		7073f0826909e86605b7f24ba93c455b_2796	4d8fdf303c55f8e586b180af2243e275_2888	2900b96dbbdb35d877a57143d080ad95_2662	K_pneumoniae_3_01634
WP_004145614.1		Dyp-type peroxidase	5	5	1	1	3594	69	2		899	899	899	9645baa8bb46fe9f9ffaa8fccfada4b3_2721		7073f0826909e86605b7f24ba93c455b_2798	4d8fdf303c55f8e586b180af2243e275_2890	2900b96dbbdb35d877a57143d080ad95_2664	K_pneumoniae_3_01633
cysP		thiosulfate/sulfate ABC transporter substrate-binding protein CysP	5	5	1	1	3595	69	1		1016	1016	1016	9645baa8bb46fe9f9ffaa8fccfada4b3_2725		7073f0826909e86605b7f24ba93c455b_2802	4d8fdf303c55f8e586b180af2243e275_2894	2900b96dbbdb35d877a57143d080ad95_2668	K_pneumoniae_3_01632
cysW		sulfate/thiosulfate ABC transporter permease CysW	5	5	1	1	3590	129	5		875	875	875	9645baa8bb46fe9f9ffaa8fccfada4b3_2729		7073f0826909e86605b7f24ba93c455b_2806	4d8fdf303c55f8e586b180af2243e275_2898	2900b96dbbdb35d877a57143d080ad95_2672	K_pneumoniae_3_01630
cysA		sulfate/thiosulfate ABC transporter ATP-binding protein CysA	5	5	1	1	3589	129	6		1094	1094	1094	9645baa8bb46fe9f9ffaa8fccfada4b3_2731		7073f0826909e86605b7f24ba93c455b_2808	4d8fdf303c55f8e586b180af2243e275_2900	2900b96dbbdb35d877a57143d080ad95_2674	K_pneumoniae_3_01629
damX		cell division protein DamX	5	5	1	1	10136	76	2		1259	1286	1280	9645baa8bb46fe9f9ffaa8fccfada4b3_742		7073f0826909e86605b7f24ba93c455b_718	4d8fdf303c55f8e586b180af2243e275_723	2900b96dbbdb35d877a57143d080ad95_733	K_pneumoniae_3_02681
cysM		cysteine synthase CysM	5	5	1	1	3846	129	7		911	911	911	9645baa8bb46fe9f9ffaa8fccfada4b3_2733		7073f0826909e86605b7f24ba93c455b_2810	4d8fdf303c55f8e586b180af2243e275_2902	2900b96dbbdb35d877a57143d080ad95_2676	K_pneumoniae_3_01628
WP_004180829.1		DUF4440 domain-containing protein	5	5	1	1	3847	129	4		395	395	395	9645baa8bb46fe9f9ffaa8fccfada4b3_2735		7073f0826909e86605b7f24ba93c455b_2812	4d8fdf303c55f8e586b180af2243e275_2904	2900b96dbbdb35d877a57143d080ad95_2678	K_pneumoniae_3_01627
ptsJ		transcriptional regulator PtsJ	5	5	1	1	3848	129	3		1298	1298	1298	9645baa8bb46fe9f9ffaa8fccfada4b3_2737		7073f0826909e86605b7f24ba93c455b_2814	4d8fdf303c55f8e586b180af2243e275_2906	2900b96dbbdb35d877a57143d080ad95_2680	K_pneumoniae_3_01626
pdxK		pyridoxine/pyridoxal/pyridoxamine kinase	5	5	1	1	3849	129	2		866	866	866	9645baa8bb46fe9f9ffaa8fccfada4b3_2739		7073f0826909e86605b7f24ba93c455b_2816	4d8fdf303c55f8e586b180af2243e275_2908	2900b96dbbdb35d877a57143d080ad95_2682	K_pneumoniae_3_01625
WP_002913605.1		hypothetical protein	5	5	1	1	3850	129	1		239	239	239	9645baa8bb46fe9f9ffaa8fccfada4b3_2741		7073f0826909e86605b7f24ba93c455b_2818	4d8fdf303c55f8e586b180af2243e275_2910	2900b96dbbdb35d877a57143d080ad95_2684	K_pneumoniae_3_01624
cysZ		sulfate transporter CysZ	5	5	1	1	3869	60	2		761	761	761	9645baa8bb46fe9f9ffaa8fccfada4b3_2751		7073f0826909e86605b7f24ba93c455b_2828	4d8fdf303c55f8e586b180af2243e275_2920	2900b96dbbdb35d877a57143d080ad95_2694	K_pneumoniae_3_01619
zipA		cell division protein ZipA	5	5	1	1	3868	60	3		1061	1061	1061	9645baa8bb46fe9f9ffaa8fccfada4b3_2753		7073f0826909e86605b7f24ba93c455b_2830	4d8fdf303c55f8e586b180af2243e275_2922	2900b96dbbdb35d877a57143d080ad95_2696	K_pneumoniae_3_01618
ligA		NAD-dependent DNA ligase LigA	5	5	1	1	3867	60	4		2015	2015	2015	9645baa8bb46fe9f9ffaa8fccfada4b3_2755		7073f0826909e86605b7f24ba93c455b_2832	4d8fdf303c55f8e586b180af2243e275_2924	2900b96dbbdb35d877a57143d080ad95_2698	K_pneumoniae_3_01617
WP_002913440.1		DUF3820 family protein	5	5	1	1	3866	60	5		218	218	218	9645baa8bb46fe9f9ffaa8fccfada4b3_2757		7073f0826909e86605b7f24ba93c455b_2834	4d8fdf303c55f8e586b180af2243e275_2926	2900b96dbbdb35d877a57143d080ad95_2700	K_pneumoniae_3_01616
WP_002913439.1		bile acid:sodium symporter	5	5	1	1	3865	60	6		998	998	998	9645baa8bb46fe9f9ffaa8fccfada4b3_2759		7073f0826909e86605b7f24ba93c455b_2836	4d8fdf303c55f8e586b180af2243e275_2928	2900b96dbbdb35d877a57143d080ad95_2702	K_pneumoniae_3_01615
WP_002913438.1		LysR family transcriptional regulator	5	5	1	1	3864	60	7		926	926	926	9645baa8bb46fe9f9ffaa8fccfada4b3_2761		7073f0826909e86605b7f24ba93c455b_2838	4d8fdf303c55f8e586b180af2243e275_2930	2900b96dbbdb35d877a57143d080ad95_2704	K_pneumoniae_3_01614
gltX		glutamate--tRNA ligase	5	5	1	1	3863	60	8		1418	1418	1418	9645baa8bb46fe9f9ffaa8fccfada4b3_2778		7073f0826909e86605b7f24ba93c455b_2855	4d8fdf303c55f8e586b180af2243e275_2947	2900b96dbbdb35d877a57143d080ad95_2718	K_pneumoniae_3_01609
WP_002913435.1		putative DNA-binding transcriptional regulator	5	5	1	1	3862	60	9		392	392	392	9645baa8bb46fe9f9ffaa8fccfada4b3_2780		7073f0826909e86605b7f24ba93c455b_2857	4d8fdf303c55f8e586b180af2243e275_2949	2900b96dbbdb35d877a57143d080ad95_2720	K_pneumoniae_3_01608
WP_002913434.1		putative DNA-binding transcriptional regulator	5	5	1	1	3861	60	10		353	353	353	9645baa8bb46fe9f9ffaa8fccfada4b3_2782		7073f0826909e86605b7f24ba93c455b_2859	4d8fdf303c55f8e586b180af2243e275_2951	2900b96dbbdb35d877a57143d080ad95_2722	K_pneumoniae_3_01607
pdeA		EAL domain-containing protein	5	5	1	1	3860	60	11		2171	2171	2171	9645baa8bb46fe9f9ffaa8fccfada4b3_2790		7073f0826909e86605b7f24ba93c455b_2867	4d8fdf303c55f8e586b180af2243e275_2959	2900b96dbbdb35d877a57143d080ad95_2730	K_pneumoniae_3_01604
nupC		nucleoside permease NupC	5	5	1	1	3859	60	12		1202	1202	1202	9645baa8bb46fe9f9ffaa8fccfada4b3_2792		7073f0826909e86605b7f24ba93c455b_2869	4d8fdf303c55f8e586b180af2243e275_2961	2900b96dbbdb35d877a57143d080ad95_2732	K_pneumoniae_3_01603
WP_002913421.1		Nramp family divalent metal transporter	5	5	1	1	3858	60	13		1241	1241	1241	9645baa8bb46fe9f9ffaa8fccfada4b3_2794		7073f0826909e86605b7f24ba93c455b_2871	4d8fdf303c55f8e586b180af2243e275_2963	2900b96dbbdb35d877a57143d080ad95_2734	K_pneumoniae_3_01602
WP_002913419.1		DUF2502 domain-containing protein	5	5	1	1	3857	60	14		353	359	357	9645baa8bb46fe9f9ffaa8fccfada4b3_2796		7073f0826909e86605b7f24ba93c455b_2873	4d8fdf303c55f8e586b180af2243e275_2965	2900b96dbbdb35d877a57143d080ad95_2736	K_pneumoniae_3_01601
mgrA		L-glyceraldehyde 3-phosphate reductase	5	5	1	1	3856	60	15		992	992	992	9645baa8bb46fe9f9ffaa8fccfada4b3_2798		7073f0826909e86605b7f24ba93c455b_2875	4d8fdf303c55f8e586b180af2243e275_2967	2900b96dbbdb35d877a57143d080ad95_2738	K_pneumoniae_3_01600
WP_004159719.1		indolepyruvate decarboxylase	5	5	1	1	3855	60	16		1661	1661	1661	9645baa8bb46fe9f9ffaa8fccfada4b3_2800		7073f0826909e86605b7f24ba93c455b_2877	4d8fdf303c55f8e586b180af2243e275_2969	2900b96dbbdb35d877a57143d080ad95_2740	K_pneumoniae_3_01599
WP_004180794.1		ion channel protein	5	5	1	1	3854	60	17		1235	1235	1235	9645baa8bb46fe9f9ffaa8fccfada4b3_2802		7073f0826909e86605b7f24ba93c455b_2879	4d8fdf303c55f8e586b180af2243e275_2971	2900b96dbbdb35d877a57143d080ad95_2742	K_pneumoniae_3_01598
glk		glucokinase	5	5	1	1	3249	60	18		965	965	965	9645baa8bb46fe9f9ffaa8fccfada4b3_2804		7073f0826909e86605b7f24ba93c455b_2881	4d8fdf303c55f8e586b180af2243e275_2973	2900b96dbbdb35d877a57143d080ad95_2744	K_pneumoniae_3_01597
WP_002913374.1		LytTR family DNA-binding domain-containing protein	5	5	1	1	3250	60	19		737	737	737	9645baa8bb46fe9f9ffaa8fccfada4b3_2806		7073f0826909e86605b7f24ba93c455b_2883	4d8fdf303c55f8e586b180af2243e275_2975	2900b96dbbdb35d877a57143d080ad95_2746	K_pneumoniae_3_01596
WP_004149230.1		sensor histidine kinase	5	5	1	1	3251	60	20		1697	1697	1697	9645baa8bb46fe9f9ffaa8fccfada4b3_2808		7073f0826909e86605b7f24ba93c455b_2885	4d8fdf303c55f8e586b180af2243e275_2977	2900b96dbbdb35d877a57143d080ad95_2748	K_pneumoniae_3_01595
WP_014907146.1		CynX/NimT family MFS transporter	5	5	1	1	3246	1	1772		1196	1196	1196	9645baa8bb46fe9f9ffaa8fccfada4b3_2818		7073f0826909e86605b7f24ba93c455b_2895	4d8fdf303c55f8e586b180af2243e275_2987	2900b96dbbdb35d877a57143d080ad95_2758	K_pneumoniae_3_01593
guaD_1		nucleoside deaminase	5	5	1	1	5883	1	1773		458	458	458	9645baa8bb46fe9f9ffaa8fccfada4b3_2820		7073f0826909e86605b7f24ba93c455b_2897	4d8fdf303c55f8e586b180af2243e275_2989	2900b96dbbdb35d877a57143d080ad95_2760	K_pneumoniae_3_01592
cynR		transcriptional regulator CynR	5	5	1	1	5884	1	1774		908	908	908	9645baa8bb46fe9f9ffaa8fccfada4b3_2822		7073f0826909e86605b7f24ba93c455b_2899	4d8fdf303c55f8e586b180af2243e275_2991	2900b96dbbdb35d877a57143d080ad95_2762	K_pneumoniae_3_01591
WP_004174945.1		WbuC family cupin fold metalloprotein	5	5	1	1	5909	1	1795		482	482	482	9645baa8bb46fe9f9ffaa8fccfada4b3_2826		7073f0826909e86605b7f24ba93c455b_2903	4d8fdf303c55f8e586b180af2243e275_2995	2900b96dbbdb35d877a57143d080ad95_2766	K_pneumoniae_3_01589
WP_004149224.1		formate/nitrite transporter family protein	5	5	1	1	5915	1	1796		929	929	929	9645baa8bb46fe9f9ffaa8fccfada4b3_2831		7073f0826909e86605b7f24ba93c455b_2908	4d8fdf303c55f8e586b180af2243e275_3000	2900b96dbbdb35d877a57143d080ad95_2891	K_pneumoniae_3_01562
mlaA		phospholipid-binding lipoprotein MlaA	5	5	1	1	5882	1	1719		761	761	761	9645baa8bb46fe9f9ffaa8fccfada4b3_2833		7073f0826909e86605b7f24ba93c455b_2910	4d8fdf303c55f8e586b180af2243e275_3002	2900b96dbbdb35d877a57143d080ad95_2893	K_pneumoniae_3_01561
fadL		long-chain fatty acid transporter FadL	5	5	1	1	5881	1	1718		1322	1322	1322	9645baa8bb46fe9f9ffaa8fccfada4b3_2835		7073f0826909e86605b7f24ba93c455b_2912	4d8fdf303c55f8e586b180af2243e275_3004	2900b96dbbdb35d877a57143d080ad95_2895	K_pneumoniae_3_01560
fadI		acetyl-CoA C-acyltransferase FadI	5	5	1	1	5879	1	1716		1310	1310	1310	9645baa8bb46fe9f9ffaa8fccfada4b3_2839		7073f0826909e86605b7f24ba93c455b_2916	4d8fdf303c55f8e586b180af2243e275_3008	2900b96dbbdb35d877a57143d080ad95_2899	K_pneumoniae_3_01558
fadJ		fatty acid oxidation complex subunit alpha FadJ	5	5	1	1	5878	1	1715		2144	2144	2144	9645baa8bb46fe9f9ffaa8fccfada4b3_2841		7073f0826909e86605b7f24ba93c455b_2918	4d8fdf303c55f8e586b180af2243e275_3010	2900b96dbbdb35d877a57143d080ad95_2901	K_pneumoniae_3_01557
smrB		endonuclease SmrB	5	5	1	1	5876	1	1713		551	551	551	9645baa8bb46fe9f9ffaa8fccfada4b3_2845		7073f0826909e86605b7f24ba93c455b_2922	4d8fdf303c55f8e586b180af2243e275_3014	2900b96dbbdb35d877a57143d080ad95_2905	K_pneumoniae_3_01555
aroC		chorismate synthase	5	5	1	1	5874	1	1711		1085	1085	1085	9645baa8bb46fe9f9ffaa8fccfada4b3_2849		7073f0826909e86605b7f24ba93c455b_2926	4d8fdf303c55f8e586b180af2243e275_3018	2900b96dbbdb35d877a57143d080ad95_2909	K_pneumoniae_3_01553
mepA		penicillin-insensitive murein endopeptidase	5	5	1	1	3192	1	1710		824	824	824	9645baa8bb46fe9f9ffaa8fccfada4b3_2851		7073f0826909e86605b7f24ba93c455b_2928	4d8fdf303c55f8e586b180af2243e275_3020	2900b96dbbdb35d877a57143d080ad95_2911	K_pneumoniae_3_01552
WP_002913340.1		sulfite exporter TauE/SafE family protein	5	5	1	1	3193	1	1709		809	809	809	9645baa8bb46fe9f9ffaa8fccfada4b3_2853		7073f0826909e86605b7f24ba93c455b_2930	4d8fdf303c55f8e586b180af2243e275_3022	2900b96dbbdb35d877a57143d080ad95_2913	K_pneumoniae_3_01551
WP_002913339.1		elongation factor P hydroxylase	5	5	1	1	3194	1	1708		548	548	548	9645baa8bb46fe9f9ffaa8fccfada4b3_2855		7073f0826909e86605b7f24ba93c455b_2932	4d8fdf303c55f8e586b180af2243e275_3024	2900b96dbbdb35d877a57143d080ad95_2915	K_pneumoniae_3_01550
WP_002913338.1		YfcL family protein	5	5	1	1	3195	1	1707		281	281	281	9645baa8bb46fe9f9ffaa8fccfada4b3_2857		7073f0826909e86605b7f24ba93c455b_2934	4d8fdf303c55f8e586b180af2243e275_3026	2900b96dbbdb35d877a57143d080ad95_2917	K_pneumoniae_3_01549
mnmC		bifunctional tRNA (5-methylaminomethyl-2-thiouridine)(34)-methyltransferase MnmD/FAD-dependent 5-carboxymethylaminomethyl-2-thiouridine(34) oxidoreductase MnmC	5	5	1	1	3196	1	1706		1988	1988	1988	9645baa8bb46fe9f9ffaa8fccfada4b3_2859		7073f0826909e86605b7f24ba93c455b_2936	4d8fdf303c55f8e586b180af2243e275_3028	2900b96dbbdb35d877a57143d080ad95_2919	K_pneumoniae_3_01548
WP_004149211.1		MFS transporter	5	5	1	1	3141	68	1		1175	1175	1175	9645baa8bb46fe9f9ffaa8fccfada4b3_2863		7073f0826909e86605b7f24ba93c455b_2940	4d8fdf303c55f8e586b180af2243e275_3032	2900b96dbbdb35d877a57143d080ad95_2923	K_pneumoniae_3_01546
flk		flagella biosynthesis regulator Flk	5	5	1	1	3140	68	2		977	977	977	9645baa8bb46fe9f9ffaa8fccfada4b3_2865		7073f0826909e86605b7f24ba93c455b_2942	4d8fdf303c55f8e586b180af2243e275_3034	2900b96dbbdb35d877a57143d080ad95_2925	K_pneumoniae_3_01545
pdxB		4-phosphoerythronate dehydrogenase PdxB	5	5	1	1	3139	68	3		1136	1136	1136	9645baa8bb46fe9f9ffaa8fccfada4b3_2867		7073f0826909e86605b7f24ba93c455b_2944	4d8fdf303c55f8e586b180af2243e275_3036	2900b96dbbdb35d877a57143d080ad95_2927	K_pneumoniae_3_01544
WP_002913227.1		aspartate-semialdehyde dehydrogenase	5	5	1	1	3138	68	4		1013	1013	1013	9645baa8bb46fe9f9ffaa8fccfada4b3_2869		7073f0826909e86605b7f24ba93c455b_2946	4d8fdf303c55f8e586b180af2243e275_3038	2900b96dbbdb35d877a57143d080ad95_2929	K_pneumoniae_3_01543
truA		tRNA pseudouridine(38-40) synthase TruA	5	5	1	1	3137	68	5		812	812	812	9645baa8bb46fe9f9ffaa8fccfada4b3_2871		7073f0826909e86605b7f24ba93c455b_2948	4d8fdf303c55f8e586b180af2243e275_3040	2900b96dbbdb35d877a57143d080ad95_2931	K_pneumoniae_3_01542
WP_002913221.1		DedA family protein	5	5	1	1	3144	68	6		659	659	659	9645baa8bb46fe9f9ffaa8fccfada4b3_2873		7073f0826909e86605b7f24ba93c455b_2950	4d8fdf303c55f8e586b180af2243e275_3042	2900b96dbbdb35d877a57143d080ad95_2933	K_pneumoniae_3_01541
folC		bifunctional tetrahydrofolate synthase/dihydrofolate synthase	5	5	1	1	3143	68	17		1268	1268	1268	9645baa8bb46fe9f9ffaa8fccfada4b3_2877		7073f0826909e86605b7f24ba93c455b_2954	4d8fdf303c55f8e586b180af2243e275_3046	2900b96dbbdb35d877a57143d080ad95_2937	K_pneumoniae_3_01539
cvpA		colicin V production protein	5	5	1	1	3145	68	19		488	488	488	9645baa8bb46fe9f9ffaa8fccfada4b3_2881		7073f0826909e86605b7f24ba93c455b_2958	4d8fdf303c55f8e586b180af2243e275_3050	2900b96dbbdb35d877a57143d080ad95_2941	K_pneumoniae_3_01537
WP_048269174.1		cytosine deaminase	5	5	1	1	4594	7	79		1283	1283	1283	9645baa8bb46fe9f9ffaa8fccfada4b3_4281		7073f0826909e86605b7f24ba93c455b_4475	4d8fdf303c55f8e586b180af2243e275_4669	2900b96dbbdb35d877a57143d080ad95_4615	K_pneumoniae_3_03810
argT		lysine/arginine/ornithine ABC transporter substrate-binding protein ArgT	5	5	1	1	3161	84	15		782	782	782	9645baa8bb46fe9f9ffaa8fccfada4b3_2899		7073f0826909e86605b7f24ba93c455b_2966	4d8fdf303c55f8e586b180af2243e275_3058	2900b96dbbdb35d877a57143d080ad95_2949	K_pneumoniae_3_01534
hisJ		histidine ABC transporter substrate-binding protein HisJ	5	5	1	1	3160	84	16		782	782	782	9645baa8bb46fe9f9ffaa8fccfada4b3_2901		7073f0826909e86605b7f24ba93c455b_2968	4d8fdf303c55f8e586b180af2243e275_3060	2900b96dbbdb35d877a57143d080ad95_2951	K_pneumoniae_3_01533
WP_002913208.1		histidine ABC transporter permease HisQ	5	5	1	1	3159	84	17		686	686	686	9645baa8bb46fe9f9ffaa8fccfada4b3_2903		7073f0826909e86605b7f24ba93c455b_2970	4d8fdf303c55f8e586b180af2243e275_3062	2900b96dbbdb35d877a57143d080ad95_2953	K_pneumoniae_3_01532
hisM		histidine ABC transporter permease HisM	5	5	1	1	3158	84	18		716	716	716	9645baa8bb46fe9f9ffaa8fccfada4b3_2905		7073f0826909e86605b7f24ba93c455b_2972	4d8fdf303c55f8e586b180af2243e275_3064	2900b96dbbdb35d877a57143d080ad95_2955	K_pneumoniae_3_01531
hisP		histidine ABC transporter ATP-binding protein HisP	5	5	1	1	3157	84	19		773	773	773	9645baa8bb46fe9f9ffaa8fccfada4b3_2907		7073f0826909e86605b7f24ba93c455b_2974	4d8fdf303c55f8e586b180af2243e275_3066	2900b96dbbdb35d877a57143d080ad95_2957	K_pneumoniae_3_01530
WP_004140943.1		GNAT family N-acetyltransferase	5	5	1	1	3156	84	20		527	527	527	9645baa8bb46fe9f9ffaa8fccfada4b3_2909		7073f0826909e86605b7f24ba93c455b_2976	4d8fdf303c55f8e586b180af2243e275_3068	2900b96dbbdb35d877a57143d080ad95_2959	K_pneumoniae_3_01529
WP_002913203.1		TIGR01777 family oxidoreductase	5	5	1	1	3154	84	7		893	893	893	9645baa8bb46fe9f9ffaa8fccfada4b3_2913		7073f0826909e86605b7f24ba93c455b_2980	4d8fdf303c55f8e586b180af2243e275_3072	2900b96dbbdb35d877a57143d080ad95_2963	K_pneumoniae_3_01528
folX		dihydroneopterin triphosphate 2'-epimerase	5	5	1	1	3152	84	6		362	362	362	9645baa8bb46fe9f9ffaa8fccfada4b3_2915		7073f0826909e86605b7f24ba93c455b_2982	4d8fdf303c55f8e586b180af2243e275_3074	2900b96dbbdb35d877a57143d080ad95_2965	K_pneumoniae_3_01527
yfcG		GSH-dependent disulfide bond oxidoreductase	5	5	1	1	3151	84	5		629	629	629	9645baa8bb46fe9f9ffaa8fccfada4b3_2917		7073f0826909e86605b7f24ba93c455b_2984	4d8fdf303c55f8e586b180af2243e275_3076	2900b96dbbdb35d877a57143d080ad95_2967	K_pneumoniae_3_01526
yfcF		glutathione transferase	5	5	1	1	3164	84	4		638	638	638	9645baa8bb46fe9f9ffaa8fccfada4b3_2919		7073f0826909e86605b7f24ba93c455b_2986	4d8fdf303c55f8e586b180af2243e275_3078	2900b96dbbdb35d877a57143d080ad95_2969	K_pneumoniae_3_01525
yfcE		phosphodiesterase	5	5	1	1	3165	84	3		551	551	551	9645baa8bb46fe9f9ffaa8fccfada4b3_2921		7073f0826909e86605b7f24ba93c455b_2988	4d8fdf303c55f8e586b180af2243e275_3080	2900b96dbbdb35d877a57143d080ad95_2971	K_pneumoniae_3_01524
yfcD		NUDIX hydrolase YfcD	5	5	1	1	3166	84	2		551	551	551	9645baa8bb46fe9f9ffaa8fccfada4b3_2923		7073f0826909e86605b7f24ba93c455b_2990	4d8fdf303c55f8e586b180af2243e275_3082	2900b96dbbdb35d877a57143d080ad95_2973	K_pneumoniae_3_01523
WP_002913194.1		DUF412 domain-containing protein	5	5	1	1	4916	160	1		455	455	455	9645baa8bb46fe9f9ffaa8fccfada4b3_2929		7073f0826909e86605b7f24ba93c455b_2996	4d8fdf303c55f8e586b180af2243e275_3088	2900b96dbbdb35d877a57143d080ad95_2979	K_pneumoniae_3_01520
WP_002913193.1		YfbU family protein	5	5	1	1	4915	160	5		494	494	494	9645baa8bb46fe9f9ffaa8fccfada4b3_2931		7073f0826909e86605b7f24ba93c455b_2998	4d8fdf303c55f8e586b180af2243e275_3090	2900b96dbbdb35d877a57143d080ad95_2981	K_pneumoniae_3_01519
WP_004174996.1		sugar phosphatase	5	5	1	1	4914	160	4		659	659	659	9645baa8bb46fe9f9ffaa8fccfada4b3_2933		7073f0826909e86605b7f24ba93c455b_3000	4d8fdf303c55f8e586b180af2243e275_3092	2900b96dbbdb35d877a57143d080ad95_2983	K_pneumoniae_3_01518
WP_057222469.1		SLC13 family permease	5	5	1	1	4913	160	3		1832	1832	1832	9645baa8bb46fe9f9ffaa8fccfada4b3_2935		7073f0826909e86605b7f24ba93c455b_3002	4d8fdf303c55f8e586b180af2243e275_3094	2900b96dbbdb35d877a57143d080ad95_2985	K_pneumoniae_3_01517
yfbR		5'-deoxynucleotidase	5	5	1	1	4912	160	2		599	599	599	9645baa8bb46fe9f9ffaa8fccfada4b3_2937		7073f0826909e86605b7f24ba93c455b_3004	4d8fdf303c55f8e586b180af2243e275_3096	2900b96dbbdb35d877a57143d080ad95_2987	K_pneumoniae_3_01516
WP_002913183.1		LysR family transcriptional regulator	5	5	1	1	4924	226	2		926	926	926	9645baa8bb46fe9f9ffaa8fccfada4b3_2941		7073f0826909e86605b7f24ba93c455b_3008	4d8fdf303c55f8e586b180af2243e275_3100	2900b96dbbdb35d877a57143d080ad95_2991	K_pneumoniae_3_01514
nuoG		NADH-quinone oxidoreductase subunit NuoG	5	5	1	1	4911	203	2		2726	2726	2726	9645baa8bb46fe9f9ffaa8fccfada4b3_2953		7073f0826909e86605b7f24ba93c455b_3020	4d8fdf303c55f8e586b180af2243e275_3112	2900b96dbbdb35d877a57143d080ad95_3003	K_pneumoniae_3_01508
nuoH		NADH-quinone oxidoreductase subunit NuoH	5	5	1	1	4910	203	1		977	977	977	9645baa8bb46fe9f9ffaa8fccfada4b3_2955		7073f0826909e86605b7f24ba93c455b_3022	4d8fdf303c55f8e586b180af2243e275_3114	2900b96dbbdb35d877a57143d080ad95_3005	K_pneumoniae_3_01507
nuoJ		NADH-quinone oxidoreductase subunit J	5	5	1	1	4900	108	1		554	554	554	9645baa8bb46fe9f9ffaa8fccfada4b3_2959		7073f0826909e86605b7f24ba93c455b_3026	4d8fdf303c55f8e586b180af2243e275_3118	2900b96dbbdb35d877a57143d080ad95_3009	K_pneumoniae_3_01505
nuoK		NADH-quinone oxidoreductase subunit NuoK	5	5	1	1	4901	108	10		302	302	302	9645baa8bb46fe9f9ffaa8fccfada4b3_2961		7073f0826909e86605b7f24ba93c455b_3028	4d8fdf303c55f8e586b180af2243e275_3120	2900b96dbbdb35d877a57143d080ad95_3011	K_pneumoniae_3_01504
nuoL		NADH-quinone oxidoreductase subunit L	5	5	1	1	4902	108	9		1841	1841	1841	9645baa8bb46fe9f9ffaa8fccfada4b3_2963		7073f0826909e86605b7f24ba93c455b_3030	4d8fdf303c55f8e586b180af2243e275_3122	2900b96dbbdb35d877a57143d080ad95_3013	K_pneumoniae_3_01503
WP_004145324.1		alternative ribosome-rescue factor A	5	5	1	1	8044	169	2	Hypothetical protein with no hits to refseq/uniprot/clusters/cdd/tigrfams/pfam overlapping another protein with hits	278	278	278	9645baa8bb46fe9f9ffaa8fccfada4b3_880		7073f0826909e86605b7f24ba93c455b_856	4d8fdf303c55f8e586b180af2243e275_861	2900b96dbbdb35d877a57143d080ad95_871	K_pneumoniae_3_02749
nuoM		NADH-quinone oxidoreductase subunit M	5	5	1	1	4903	108	8		1529	1529	1529	9645baa8bb46fe9f9ffaa8fccfada4b3_2965		7073f0826909e86605b7f24ba93c455b_3032	4d8fdf303c55f8e586b180af2243e275_3124	2900b96dbbdb35d877a57143d080ad95_3015	K_pneumoniae_3_01502
nuoN		NADH-quinone oxidoreductase subunit NuoN	5	5	1	1	4904	108	7		1457	1457	1457	9645baa8bb46fe9f9ffaa8fccfada4b3_2967		7073f0826909e86605b7f24ba93c455b_3034	4d8fdf303c55f8e586b180af2243e275_3126	2900b96dbbdb35d877a57143d080ad95_3017	K_pneumoniae_3_01501
rnz		ribonuclease Z	5	5	1	1	4905	108	6		920	920	920	9645baa8bb46fe9f9ffaa8fccfada4b3_2969		7073f0826909e86605b7f24ba93c455b_3036	4d8fdf303c55f8e586b180af2243e275_3128	2900b96dbbdb35d877a57143d080ad95_3019	K_pneumoniae_3_01500
WP_004184987.1		GNAT family N-acetyltransferase	5	5	1	1	4906	108	5		461	461	461	9645baa8bb46fe9f9ffaa8fccfada4b3_2971		7073f0826909e86605b7f24ba93c455b_3038	4d8fdf303c55f8e586b180af2243e275_3130	2900b96dbbdb35d877a57143d080ad95_3021	K_pneumoniae_3_01499
menF		isochorismate synthase MenF	5	5	1	1	4907	108	4		1289	1289	1289	9645baa8bb46fe9f9ffaa8fccfada4b3_2973		7073f0826909e86605b7f24ba93c455b_3040	4d8fdf303c55f8e586b180af2243e275_3132	2900b96dbbdb35d877a57143d080ad95_3023	K_pneumoniae_3_01498
menD		2-succinyl-5-enolpyruvyl-6-hydroxy-3-cyclohexene-1-carboxylic-acid synthase	5	5	1	1	4908	108	3		1670	1670	1670	9645baa8bb46fe9f9ffaa8fccfada4b3_2975		7073f0826909e86605b7f24ba93c455b_3042	4d8fdf303c55f8e586b180af2243e275_3134	2900b96dbbdb35d877a57143d080ad95_3025	K_pneumoniae_3_01497
menC		o-succinylbenzoate synthase	5	5	1	1	4954	131	1		965	965	965	9645baa8bb46fe9f9ffaa8fccfada4b3_2981		7073f0826909e86605b7f24ba93c455b_3048	4d8fdf303c55f8e586b180af2243e275_3140	2900b96dbbdb35d877a57143d080ad95_3031	K_pneumoniae_3_01494
WP_002913072.1		Rpn family recombination-promoting nuclease/putative transposase	5	5	1	1	4951	131	4		941	953	945	9645baa8bb46fe9f9ffaa8fccfada4b3_2987		7073f0826909e86605b7f24ba93c455b_3054	4d8fdf303c55f8e586b180af2243e275_3146	2900b96dbbdb35d877a57143d080ad95_3037	K_pneumoniae_3_01491
WP_002913070.1		YfaZ family outer membrane protein	5	5	1	1	4950	131	5		542	542	542	9645baa8bb46fe9f9ffaa8fccfada4b3_2989		7073f0826909e86605b7f24ba93c455b_3056	4d8fdf303c55f8e586b180af2243e275_3148	2900b96dbbdb35d877a57143d080ad95_3039	K_pneumoniae_3_01490
WP_004151110.1		nicotinamide mononucleotide deamidase-related protein YfaY	5	5	1	1	4949	131	6		1196	1196	1196	9645baa8bb46fe9f9ffaa8fccfada4b3_2991		7073f0826909e86605b7f24ba93c455b_3058	4d8fdf303c55f8e586b180af2243e275_3150	2900b96dbbdb35d877a57143d080ad95_3041	K_pneumoniae_3_01489
WP_002913046.1		IclR family transcriptional regulator	5	5	1	1	4971	131	7		785	785	785	9645baa8bb46fe9f9ffaa8fccfada4b3_2993		7073f0826909e86605b7f24ba93c455b_3060	4d8fdf303c55f8e586b180af2243e275_3152	2900b96dbbdb35d877a57143d080ad95_3043	K_pneumoniae_3_01488
yfaU		2-keto-3-deoxy-L-rhamnonate aldolase	5	5	1	1	4898	122	2		803	803	803	9645baa8bb46fe9f9ffaa8fccfada4b3_2999		7073f0826909e86605b7f24ba93c455b_3066	4d8fdf303c55f8e586b180af2243e275_3158	2900b96dbbdb35d877a57143d080ad95_3049	K_pneumoniae_3_01485
glpC		anaerobic glycerol-3-phosphate dehydrogenase subunit C	5	5	1	1	4897	122	3		1178	1178	1178	9645baa8bb46fe9f9ffaa8fccfada4b3_3001		7073f0826909e86605b7f24ba93c455b_3068	4d8fdf303c55f8e586b180af2243e275_3160	2900b96dbbdb35d877a57143d080ad95_3051	K_pneumoniae_3_01484
glpB		glycerol-3-phosphate dehydrogenase subunit GlpB	5	5	1	1	4896	122	4		1259	1259	1259	9645baa8bb46fe9f9ffaa8fccfada4b3_3003		7073f0826909e86605b7f24ba93c455b_3070	4d8fdf303c55f8e586b180af2243e275_3162	2900b96dbbdb35d877a57143d080ad95_3053	K_pneumoniae_3_01483
glpA		anaerobic glycerol-3-phosphate dehydrogenase subunit A	5	5	1	1	4892	122	8		1622	1622	1622	9645baa8bb46fe9f9ffaa8fccfada4b3_3005		7073f0826909e86605b7f24ba93c455b_3072	4d8fdf303c55f8e586b180af2243e275_3164	2900b96dbbdb35d877a57143d080ad95_3055	K_pneumoniae_3_01482
glpT		glycerol-3-phosphate transporter	5	5	1	1	4893	122	7		1346	1346	1346	9645baa8bb46fe9f9ffaa8fccfada4b3_3007		7073f0826909e86605b7f24ba93c455b_3074	4d8fdf303c55f8e586b180af2243e275_3166	2900b96dbbdb35d877a57143d080ad95_3057	K_pneumoniae_3_01481
glpQ		glycerophosphodiester phosphodiesterase	5	5	1	1	4894	122	6		1070	1070	1070	9645baa8bb46fe9f9ffaa8fccfada4b3_3009		7073f0826909e86605b7f24ba93c455b_3076	4d8fdf303c55f8e586b180af2243e275_3168	2900b96dbbdb35d877a57143d080ad95_3059	K_pneumoniae_3_01480
yfaE		class I ribonucleotide reductase maintenance protein YfaE	5	5	1	1	4895	122	5		254	254	254	9645baa8bb46fe9f9ffaa8fccfada4b3_3011		7073f0826909e86605b7f24ba93c455b_3078	4d8fdf303c55f8e586b180af2243e275_3170	2900b96dbbdb35d877a57143d080ad95_3061	K_pneumoniae_3_01479
nrdA		ribonucleoside-diphosphate reductase subunit alpha	5	5	1	1	4891	167	4		2285	2285	2285	9645baa8bb46fe9f9ffaa8fccfada4b3_3015		7073f0826909e86605b7f24ba93c455b_3082	4d8fdf303c55f8e586b180af2243e275_3174	2900b96dbbdb35d877a57143d080ad95_3065	K_pneumoniae_3_01477
WP_002913014.1		bifunctional 3-demethylubiquinone 3-O-methyltransferase/2-octaprenyl-6-hydroxy phenol methylase	5	5	1	1	4890	167	3		728	728	728	9645baa8bb46fe9f9ffaa8fccfada4b3_3017		7073f0826909e86605b7f24ba93c455b_3084	4d8fdf303c55f8e586b180af2243e275_3176	2900b96dbbdb35d877a57143d080ad95_3067	K_pneumoniae_3_01476
dusB		tRNA dihydrouridine synthase DusB	5	5	1	1	8122	263	1		965	965	965	9645baa8bb46fe9f9ffaa8fccfada4b3_931	fb55d8fe7cfc5cfebfa700165fb94f7d_4263		4d8fdf303c55f8e586b180af2243e275_918	2900b96dbbdb35d877a57143d080ad95_922	K_pneumoniae_3_01777
gyrA		DNA topoisomerase (ATP-hydrolyzing) subunit A	5	5	1	1	4889	167	2		2633	2633	2633	9645baa8bb46fe9f9ffaa8fccfada4b3_3019		7073f0826909e86605b7f24ba93c455b_3086	4d8fdf303c55f8e586b180af2243e275_3178	2900b96dbbdb35d877a57143d080ad95_3069	K_pneumoniae_3_01475
rcsC		two-component system sensor histidine kinase RcsC	5	5	1	1	5017	167	1		2840	2840	2840	9645baa8bb46fe9f9ffaa8fccfada4b3_3021		7073f0826909e86605b7f24ba93c455b_3088	4d8fdf303c55f8e586b180af2243e275_3180	2900b96dbbdb35d877a57143d080ad95_3071	K_pneumoniae_3_01474
rcsD		phosphotransferase RcsD	5	5	1	1	5016	27	21		2657	2657	2657	9645baa8bb46fe9f9ffaa8fccfada4b3_3025		7073f0826909e86605b7f24ba93c455b_3092	4d8fdf303c55f8e586b180af2243e275_3184	2900b96dbbdb35d877a57143d080ad95_3075	K_pneumoniae_3_01472
apbE		FAD:protein FMN transferase ApbE	5	5	1	1	5015	27	23		1052	1052	1052	9645baa8bb46fe9f9ffaa8fccfada4b3_3029		7073f0826909e86605b7f24ba93c455b_3096	4d8fdf303c55f8e586b180af2243e275_3188	2900b96dbbdb35d877a57143d080ad95_3079	K_pneumoniae_3_01470
ada		bifunctional DNA-binding transcriptional regulator/O6-methylguanine-DNA methyltransferase Ada	5	5	1	1	5013	27	24		1064	1064	1064	9645baa8bb46fe9f9ffaa8fccfada4b3_3031		7073f0826909e86605b7f24ba93c455b_3098	4d8fdf303c55f8e586b180af2243e275_3190	2900b96dbbdb35d877a57143d080ad95_3081	K_pneumoniae_3_01469
alkB		DNA oxidative demethylase AlkB	5	5	1	1	5012	27	25		653	653	653	9645baa8bb46fe9f9ffaa8fccfada4b3_3033		7073f0826909e86605b7f24ba93c455b_3100	4d8fdf303c55f8e586b180af2243e275_3192	2900b96dbbdb35d877a57143d080ad95_3083	K_pneumoniae_3_01468
WP_032420307.1		multidrug ABC transporter permease/ATP-binding protein	5	5	1	1	5011	27	26		1643	1643	1643	9645baa8bb46fe9f9ffaa8fccfada4b3_3035		7073f0826909e86605b7f24ba93c455b_3102	4d8fdf303c55f8e586b180af2243e275_3194	2900b96dbbdb35d877a57143d080ad95_3085	K_pneumoniae_3_01467
mgtE		magnesium transporter	5	5	1	1	5010	27	27		1436	1436	1436	9645baa8bb46fe9f9ffaa8fccfada4b3_3037		7073f0826909e86605b7f24ba93c455b_3104	4d8fdf303c55f8e586b180af2243e275_3196	2900b96dbbdb35d877a57143d080ad95_3087	K_pneumoniae_3_01466
mqo		malate dehydrogenase (quinone)	5	5	1	1	5008	27	29		1634	1634	1634	9645baa8bb46fe9f9ffaa8fccfada4b3_3041		7073f0826909e86605b7f24ba93c455b_3108	4d8fdf303c55f8e586b180af2243e275_3200	2900b96dbbdb35d877a57143d080ad95_3091	K_pneumoniae_3_01464
eco		serine protease inhibitor ecotin	5	5	1	1	5007	27	30		482	491	489	9645baa8bb46fe9f9ffaa8fccfada4b3_3043		7073f0826909e86605b7f24ba93c455b_3110	4d8fdf303c55f8e586b180af2243e275_3202	2900b96dbbdb35d877a57143d080ad95_3093	K_pneumoniae_3_01463
WP_002912992.1		AI-2E family transporter	5	5	1	1	5006	27	31		1109	1109	1109	9645baa8bb46fe9f9ffaa8fccfada4b3_3045		7073f0826909e86605b7f24ba93c455b_3112	4d8fdf303c55f8e586b180af2243e275_3204	2900b96dbbdb35d877a57143d080ad95_3095	K_pneumoniae_3_01462
yejM		LPS biosynthesis-modulating metalloenzyme YejM	5	5	1	1	5005	27	32		1760	1760	1760	9645baa8bb46fe9f9ffaa8fccfada4b3_3050		7073f0826909e86605b7f24ba93c455b_3117	4d8fdf303c55f8e586b180af2243e275_3209	2900b96dbbdb35d877a57143d080ad95_3100	K_pneumoniae_3_01460
yejK		nucleoid-associated protein YejK	5	5	1	1	5003	27	34		1007	1007	1007	9645baa8bb46fe9f9ffaa8fccfada4b3_3054		7073f0826909e86605b7f24ba93c455b_3121	4d8fdf303c55f8e586b180af2243e275_3213	2900b96dbbdb35d877a57143d080ad95_3104	K_pneumoniae_3_01458
WP_002912986.1		DeoR/GlpR family DNA-binding transcription regulator	5	5	1	1	5002	27	35		761	761	761	9645baa8bb46fe9f9ffaa8fccfada4b3_3056		7073f0826909e86605b7f24ba93c455b_3123	4d8fdf303c55f8e586b180af2243e275_3215	2900b96dbbdb35d877a57143d080ad95_3106	K_pneumoniae_3_01457
WP_004144265.1		NUDIX domain-containing protein	5	5	1	1	5078	27	36		596	596	596	9645baa8bb46fe9f9ffaa8fccfada4b3_3058		7073f0826909e86605b7f24ba93c455b_3125	4d8fdf303c55f8e586b180af2243e275_3217	2900b96dbbdb35d877a57143d080ad95_3108	K_pneumoniae_3_01456
WP_002912983.1		LysR family transcriptional regulator	5	5	1	1	5080	27	38		887	887	887	9645baa8bb46fe9f9ffaa8fccfada4b3_3062		7073f0826909e86605b7f24ba93c455b_3129	4d8fdf303c55f8e586b180af2243e275_3221	2900b96dbbdb35d877a57143d080ad95_3112	K_pneumoniae_3_01454
rplY		50S ribosomal protein L25	5	5	1	1	5081	27	39		284	284	284	9645baa8bb46fe9f9ffaa8fccfada4b3_3064		7073f0826909e86605b7f24ba93c455b_3131	4d8fdf303c55f8e586b180af2243e275_3223	2900b96dbbdb35d877a57143d080ad95_3114	K_pneumoniae_3_01453
WP_004144263.1		DEAD/DEAH box helicase	5	5	1	1	5082	27	40		1757	1757	1757	9645baa8bb46fe9f9ffaa8fccfada4b3_3066		7073f0826909e86605b7f24ba93c455b_3133	4d8fdf303c55f8e586b180af2243e275_3225	2900b96dbbdb35d877a57143d080ad95_3116	K_pneumoniae_3_01452
rsuA		16S rRNA pseudouridine(516) synthase RsuA	5	5	1	1	5083	27	19		719	719	719	9645baa8bb46fe9f9ffaa8fccfada4b3_3068		7073f0826909e86605b7f24ba93c455b_3135	4d8fdf303c55f8e586b180af2243e275_3227	2900b96dbbdb35d877a57143d080ad95_3118	K_pneumoniae_3_01451
WP_002912975.1		Bcr/CflA family multidrug efflux MFS transporter	5	5	1	1	5084	27	18		1196	1196	1196	9645baa8bb46fe9f9ffaa8fccfada4b3_3070		7073f0826909e86605b7f24ba93c455b_3137	4d8fdf303c55f8e586b180af2243e275_3229	2900b96dbbdb35d877a57143d080ad95_3120	K_pneumoniae_3_01450
WP_002912974.1		YejG family protein	5	5	1	1	5085	27	17		344	344	344	9645baa8bb46fe9f9ffaa8fccfada4b3_3072		7073f0826909e86605b7f24ba93c455b_3139	4d8fdf303c55f8e586b180af2243e275_3231	2900b96dbbdb35d877a57143d080ad95_3122	K_pneumoniae_3_01449
yejF		microcin C ABC transporter ATP-binding protein YejF	5	5	1	1	5086	27	16		1589	1589	1589	9645baa8bb46fe9f9ffaa8fccfada4b3_3074		7073f0826909e86605b7f24ba93c455b_3141	4d8fdf303c55f8e586b180af2243e275_3233	2900b96dbbdb35d877a57143d080ad95_3124	K_pneumoniae_3_01448
WP_002912972.1		ABC transporter permease subunit	5	5	1	1	5087	27	15		1025	1025	1025	9645baa8bb46fe9f9ffaa8fccfada4b3_3076		7073f0826909e86605b7f24ba93c455b_3143	4d8fdf303c55f8e586b180af2243e275_3235	2900b96dbbdb35d877a57143d080ad95_3126	K_pneumoniae_3_01447
WP_004200501.1		microcin C ABC transporter permease YejB	5	5	1	1	5088	27	14		1094	1094	1094	9645baa8bb46fe9f9ffaa8fccfada4b3_3078		7073f0826909e86605b7f24ba93c455b_3145	4d8fdf303c55f8e586b180af2243e275_3237	2900b96dbbdb35d877a57143d080ad95_3128	K_pneumoniae_3_01446
WP_004899502.1		extracellular solute-binding protein	5	5	1	1	5089	27	13		1805	1805	1805	9645baa8bb46fe9f9ffaa8fccfada4b3_3080		7073f0826909e86605b7f24ba93c455b_3147	4d8fdf303c55f8e586b180af2243e275_3239	2900b96dbbdb35d877a57143d080ad95_3130	K_pneumoniae_3_01445
WP_200143713.1		cyclic di-GMP phosphodiesterase	5	5	1	1	5090	27	12		1562	1562	1562	9645baa8bb46fe9f9ffaa8fccfada4b3_3082		7073f0826909e86605b7f24ba93c455b_3149	4d8fdf303c55f8e586b180af2243e275_3241	2900b96dbbdb35d877a57143d080ad95_3132	K_pneumoniae_3_01444
[truncated: 10,334 more rows]

## Sheet: Column Info
Column	Column Name	Description
[truncated: 14 more rows]
