# Supplementary material for: Comparative De Novo and Pan-Genome Analysis of MDR Nosocomial Bacteria Isolated from Hospitals in Jeddah, Saudi Arabia
Source: MDPI journal article supplement (doi:10.3390/microorganisms11102432), 2023-09-28
Supplement: s1 [file Table S4 gene_presence_absence.xls]

## Sheet: Gene Presence Absence
Gene	Non-unique Gene name	Annotation	No. isolates	No. sequences	Avg sequences per isolate	Genome Fragment	Order within Fragment	Accessory Fragment	Accessory Order with Fragment	QC	Min group size nuc	Max group size nuc	Avg group size nuc	CP053765.1	CP071280.1	CP093852.1	CP093854.1	CP094227.1	K_pneumoniae_6
gcvA		glycine cleavage system transcriptional regulator GcvA	6	6	1	1	4428				824	917	901	a177eae4552a0a1383f611870b669525_1974	40b06fe84ca1b8758d0c3f8a0dea34af_1358	20e8a30293b7b0c63abbc29d0c4c19ee_3585	6db8800965c51df47e711e72bf22185f_3370	0ed7320c6f511ce95f40560feeb5531a_3849	K_pneumoniae_6_02285
WP_004193741.1		nitrous oxide-stimulated promoter family protein	6	6	1	1	1929				341	395	350	a177eae4552a0a1383f611870b669525_2136	40b06fe84ca1b8758d0c3f8a0dea34af_1520	20e8a30293b7b0c63abbc29d0c4c19ee_3423	6db8800965c51df47e711e72bf22185f_3532	0ed7320c6f511ce95f40560feeb5531a_4011	K_pneumoniae_6_02364
WP_004151052.1		PTS transporter subunit EIIC	6	6	1	1	1939				1271	1400	1292	a177eae4552a0a1383f611870b669525_2156	40b06fe84ca1b8758d0c3f8a0dea34af_1540	20e8a30293b7b0c63abbc29d0c4c19ee_3403	6db8800965c51df47e711e72bf22185f_3552	0ed7320c6f511ce95f40560feeb5531a_4031	K_pneumoniae_6_02374
mltB		lytic murein transglycosylase B	6	6	1	1	1976				1055	1079	1075	a177eae4552a0a1383f611870b669525_2228	40b06fe84ca1b8758d0c3f8a0dea34af_1612	20e8a30293b7b0c63abbc29d0c4c19ee_3331	6db8800965c51df47e711e72bf22185f_3624	0ed7320c6f511ce95f40560feeb5531a_4103	K_pneumoniae_6_02410
WP_015958867.1		ATP-binding cassette domain-containing protein	6	6	1	1	1977				677	710	704	a177eae4552a0a1383f611870b669525_2230	40b06fe84ca1b8758d0c3f8a0dea34af_1614	20e8a30293b7b0c63abbc29d0c4c19ee_3327	6db8800965c51df47e711e72bf22185f_3626	0ed7320c6f511ce95f40560feeb5531a_4105	K_pneumoniae_6_02412
WP_004218900.1		LuxR C-terminal-related transcriptional regulator	6	6	1	1	2026				617	701	631	a177eae4552a0a1383f611870b669525_2343	40b06fe84ca1b8758d0c3f8a0dea34af_1727	20e8a30293b7b0c63abbc29d0c4c19ee_3214	6db8800965c51df47e711e72bf22185f_3739	0ed7320c6f511ce95f40560feeb5531a_4218	K_pneumoniae_6_02466
WP_020323979.1		transporter substrate-binding domain-containing protein	6	6	1	1	2027				848	890	855	a177eae4552a0a1383f611870b669525_2345	40b06fe84ca1b8758d0c3f8a0dea34af_1729	20e8a30293b7b0c63abbc29d0c4c19ee_3212	6db8800965c51df47e711e72bf22185f_3741	0ed7320c6f511ce95f40560feeb5531a_4220	K_pneumoniae_6_02467
WP_004174789.1		flavin reductase	6	6	1	1	2042				572	638	583	a177eae4552a0a1383f611870b669525_2375	40b06fe84ca1b8758d0c3f8a0dea34af_1759	20e8a30293b7b0c63abbc29d0c4c19ee_3182	6db8800965c51df47e711e72bf22185f_3771	0ed7320c6f511ce95f40560feeb5531a_4250	K_pneumoniae_6_02482
group_108		DUF550 domain-containing protein	6	6	1	1	2094				461	611	486	a177eae4552a0a1383f611870b669525_2495	40b06fe84ca1b8758d0c3f8a0dea34af_1879	20e8a30293b7b0c63abbc29d0c4c19ee_9876	6db8800965c51df47e711e72bf22185f_9961	0ed7320c6f511ce95f40560feeb5531a_10259	K_pneumoniae_6_04895
yfhb		phosphatidylglycerophosphatase C	6	6	1	1	803				611	635	615	a177eae4552a0a1383f611870b669525_2561	40b06fe84ca1b8758d0c3f8a0dea34af_2031	20e8a30293b7b0c63abbc29d0c4c19ee_1314	6db8800965c51df47e711e72bf22185f_2309	0ed7320c6f511ce95f40560feeb5531a_2788	K_pneumoniae_6_01416
qseG		two-component system QseEF-associated lipoprotein QseG	6	6	1	1	798				686	707	689	a177eae4552a0a1383f611870b669525_2571	40b06fe84ca1b8758d0c3f8a0dea34af_2041	20e8a30293b7b0c63abbc29d0c4c19ee_1304	6db8800965c51df47e711e72bf22185f_2299	0ed7320c6f511ce95f40560feeb5531a_2778	K_pneumoniae_6_01411
WP_004197379.1		DoxX family protein	6	6	1	1	793				422	467	429	a177eae4552a0a1383f611870b669525_2581	40b06fe84ca1b8758d0c3f8a0dea34af_2051	20e8a30293b7b0c63abbc29d0c4c19ee_1294	6db8800965c51df47e711e72bf22185f_2289	0ed7320c6f511ce95f40560feeb5531a_2768	K_pneumoniae_6_01406
WP_004213157.1		site-specific integrase	6	6	1	1	759				1253	1352	1269	a177eae4552a0a1383f611870b669525_2649	40b06fe84ca1b8758d0c3f8a0dea34af_2123	20e8a30293b7b0c63abbc29d0c4c19ee_1226	6db8800965c51df47e711e72bf22185f_2221	0ed7320c6f511ce95f40560feeb5531a_2700	K_pneumoniae_6_01372
WP_032424539.1		single-stranded DNA-binding protein	6	6	1	1	747				446	668	483	a177eae4552a0a1383f611870b669525_2675	40b06fe84ca1b8758d0c3f8a0dea34af_2149	20e8a30293b7b0c63abbc29d0c4c19ee_1200	6db8800965c51df47e711e72bf22185f_2195	0ed7320c6f511ce95f40560feeb5531a_2674	K_pneumoniae_6_01361
WP_022615614.1		hypothetical protein	6	6	1	1	741				350	371	367	a177eae4552a0a1383f611870b669525_2687	40b06fe84ca1b8758d0c3f8a0dea34af_2161	20e8a30293b7b0c63abbc29d0c4c19ee_1188	6db8800965c51df47e711e72bf22185f_2183	0ed7320c6f511ce95f40560feeb5531a_2662	K_pneumoniae_6_01356
WP_020325283.1		anaerobic sulfatase maturase	6	6	1	1	729				1067	1178	1159	a177eae4552a0a1383f611870b669525_2709	40b06fe84ca1b8758d0c3f8a0dea34af_2183	20e8a30293b7b0c63abbc29d0c4c19ee_1166	6db8800965c51df47e711e72bf22185f_2161	0ed7320c6f511ce95f40560feeb5531a_2640	K_pneumoniae_6_01344
WP_004221278.1		LysR family transcriptional regulator	6	6	1	1	727				887	911	907	a177eae4552a0a1383f611870b669525_2713	40b06fe84ca1b8758d0c3f8a0dea34af_2187	20e8a30293b7b0c63abbc29d0c4c19ee_1162	6db8800965c51df47e711e72bf22185f_2157	0ed7320c6f511ce95f40560feeb5531a_2636	K_pneumoniae_6_01341
WP_071527881.1		DnaA inactivator Hda	6	6	1	1	716				677	701	697	a177eae4552a0a1383f611870b669525_2735	40b06fe84ca1b8758d0c3f8a0dea34af_2209	20e8a30293b7b0c63abbc29d0c4c19ee_1140	6db8800965c51df47e711e72bf22185f_2135	0ed7320c6f511ce95f40560feeb5531a_2614	K_pneumoniae_6_01330
sixA		phosphohistidine phosphatase SixA	6	6	1	1	622				386	485	468	a177eae4552a0a1383f611870b669525_2945	40b06fe84ca1b8758d0c3f8a0dea34af_2419	20e8a30293b7b0c63abbc29d0c4c19ee_930	6db8800965c51df47e711e72bf22185f_1925	0ed7320c6f511ce95f40560feeb5531a_2404	K_pneumoniae_6_01234
prmB		50S ribosomal protein L3 N(5)-glutamine methyltransferase	6	6	1	1	620				932	1004	944	a177eae4552a0a1383f611870b669525_2949	40b06fe84ca1b8758d0c3f8a0dea34af_2423	20e8a30293b7b0c63abbc29d0c4c19ee_926	6db8800965c51df47e711e72bf22185f_1921	0ed7320c6f511ce95f40560feeb5531a_2400	K_pneumoniae_6_01232
folA		type 3 dihydrofolate reductase	6	6	1	1	1731				479	479	479	a177eae4552a0a1383f611870b669525_8857	40b06fe84ca1b8758d0c3f8a0dea34af_8327	20e8a30293b7b0c63abbc29d0c4c19ee_4822	6db8800965c51df47e711e72bf22185f_4147	0ed7320c6f511ce95f40560feeb5531a_4626	K_pneumoniae_6_02660
WP_102023926.1		formylglycine-generating enzyme family protein	6	6	1	1	4741				761	890	813	a177eae4552a0a1383f611870b669525_4219	40b06fe84ca1b8758d0c3f8a0dea34af_3614	20e8a30293b7b0c63abbc29d0c4c19ee_9231	6db8800965c51df47e711e72bf22185f_9298	0ed7320c6f511ce95f40560feeb5531a_7784	K_pneumoniae_6_03281
accD		acetyl-CoA carboxylase, carboxyltransferase subunit beta	6	6	1	1	606				920	983	930	a177eae4552a0a1383f611870b669525_2977	40b06fe84ca1b8758d0c3f8a0dea34af_2451	20e8a30293b7b0c63abbc29d0c4c19ee_898	6db8800965c51df47e711e72bf22185f_1893	0ed7320c6f511ce95f40560feeb5531a_2372	K_pneumoniae_6_01218
gstA		glutathione transferase GstA	6	6	1	1	5784				605	605	605	a177eae4552a0a1383f611870b669525_4889	40b06fe84ca1b8758d0c3f8a0dea34af_5242	20e8a30293b7b0c63abbc29d0c4c19ee_2482	6db8800965c51df47e711e72bf22185f_2482	0ed7320c6f511ce95f40560feeb5531a_3444	K_pneumoniae_6_02102
smrA		DNA endonuclease SmrA	6	6	1	1	4141				563	563	563	a177eae4552a0a1383f611870b669525_5850	40b06fe84ca1b8758d0c3f8a0dea34af_4279	20e8a30293b7b0c63abbc29d0c4c19ee_6836	6db8800965c51df47e711e72bf22185f_7064	0ed7320c6f511ce95f40560feeb5531a_6940	K_pneumoniae_6_04126
hpxR		LysR family hpxDE operon transcriptional regulator HpxR	6	6	1	1	2694				923	923	923	a177eae4552a0a1383f611870b669525_5564	40b06fe84ca1b8758d0c3f8a0dea34af_4565	20e8a30293b7b0c63abbc29d0c4c19ee_10181	6db8800965c51df47e711e72bf22185f_10222	0ed7320c6f511ce95f40560feeb5531a_8673	K_pneumoniae_6_03849
WP_002898701.1		YccJ family protein	6	6	1	1	4295				227	227	227	a177eae4552a0a1383f611870b669525_6791	40b06fe84ca1b8758d0c3f8a0dea34af_6259	20e8a30293b7b0c63abbc29d0c4c19ee_5317	6db8800965c51df47e711e72bf22185f_5341	0ed7320c6f511ce95f40560feeb5531a_5820	K_pneumoniae_6_00190
rutB		pyrimidine utilization protein B	6	6	1	1	4305				710	710	710	a177eae4552a0a1383f611870b669525_6771	40b06fe84ca1b8758d0c3f8a0dea34af_6239	20e8a30293b7b0c63abbc29d0c4c19ee_5297	6db8800965c51df47e711e72bf22185f_5321	0ed7320c6f511ce95f40560feeb5531a_5800	K_pneumoniae_6_00182
WP_004177546.1		DUF3343 domain-containing protein	6	6	1	1	1859				254	254	254	a177eae4552a0a1383f611870b669525_9129	40b06fe84ca1b8758d0c3f8a0dea34af_8599	20e8a30293b7b0c63abbc29d0c4c19ee_5094	6db8800965c51df47e711e72bf22185f_3875	0ed7320c6f511ce95f40560feeb5531a_4354	K_pneumoniae_6_02532
WP_004177719.1		transporter substrate-binding domain-containing protein	6	6	1	1	5936				731	731	731	a177eae4552a0a1383f611870b669525_9529	40b06fe84ca1b8758d0c3f8a0dea34af_8999	20e8a30293b7b0c63abbc29d0c4c19ee_4163	6db8800965c51df47e711e72bf22185f_4806	0ed7320c6f511ce95f40560feeb5531a_5303	K_pneumoniae_6_01647
WP_043906795.1		ABC transporter ATP-binding protein	6	6	1	1	397				1070	1070	1070	a177eae4552a0a1383f611870b669525_4615	40b06fe84ca1b8758d0c3f8a0dea34af_4007	20e8a30293b7b0c63abbc29d0c4c19ee_7678	6db8800965c51df47e711e72bf22185f_7998	0ed7320c6f511ce95f40560feeb5531a_6061	K_pneumoniae_6_03877
tam		trans-aconitate 2-methyltransferase	6	6	1	1	2676				761	761	761	a177eae4552a0a1383f611870b669525_5600	40b06fe84ca1b8758d0c3f8a0dea34af_4529	20e8a30293b7b0c63abbc29d0c4c19ee_10145	6db8800965c51df47e711e72bf22185f_10258	0ed7320c6f511ce95f40560feeb5531a_8637	K_pneumoniae_6_03831
WP_004180155.1		S-(hydroxymethyl)glutathione dehydrogenase/class III alcohol dehydrogenase	6	6	1	1	5762				1118	1118	1118	a177eae4552a0a1383f611870b669525_4931	40b06fe84ca1b8758d0c3f8a0dea34af_5200	20e8a30293b7b0c63abbc29d0c4c19ee_2524	6db8800965c51df47e711e72bf22185f_2524	0ed7320c6f511ce95f40560feeb5531a_3402	K_pneumoniae_6_02081
nuoA		NADH-quinone oxidoreductase subunit NuoA	6	6	1	1	577				359	446	431	a177eae4552a0a1383f611870b669525_3035	40b06fe84ca1b8758d0c3f8a0dea34af_2509	20e8a30293b7b0c63abbc29d0c4c19ee_840	6db8800965c51df47e711e72bf22185f_1835	0ed7320c6f511ce95f40560feeb5531a_2314	K_pneumoniae_6_01191
ivy		Ivy family C-type lysozyme inhibitor	6	6	1	1	1183				446	446	446	a177eae4552a0a1383f611870b669525_7723	40b06fe84ca1b8758d0c3f8a0dea34af_7193	20e8a30293b7b0c63abbc29d0c4c19ee_1658	6db8800965c51df47e711e72bf22185f_766	0ed7320c6f511ce95f40560feeb5531a_766	K_pneumoniae_6_00646
WP_004178781.1		hypothetical protein	6	6	1	1	1294				338	338	338	a177eae4552a0a1383f611870b669525_7950	40b06fe84ca1b8758d0c3f8a0dea34af_7420	20e8a30293b7b0c63abbc29d0c4c19ee_1431	6db8800965c51df47e711e72bf22185f_539	0ed7320c6f511ce95f40560feeb5531a_539	K_pneumoniae_6_00755
WP_002914284.1		hypothetical protein	6	6	1	1	2010				179	179	179	a177eae4552a0a1383f611870b669525_2311	40b06fe84ca1b8758d0c3f8a0dea34af_1695	20e8a30293b7b0c63abbc29d0c4c19ee_3246	6db8800965c51df47e711e72bf22185f_3707	0ed7320c6f511ce95f40560feeb5531a_4186	K_pneumoniae_6_02450
WP_002903632.1		LysR substrate-binding domain-containing protein	6	6	1	1	4159				926	926	926	a177eae4552a0a1383f611870b669525_5814	40b06fe84ca1b8758d0c3f8a0dea34af_4315	20e8a30293b7b0c63abbc29d0c4c19ee_6800	6db8800965c51df47e711e72bf22185f_7100	0ed7320c6f511ce95f40560feeb5531a_6904	K_pneumoniae_6_03729
ridA		2-iminobutanoate/2-iminopropanoate deaminase	6	6	1	1	5905				386	386	386	a177eae4552a0a1383f611870b669525_9334	40b06fe84ca1b8758d0c3f8a0dea34af_8804	20e8a30293b7b0c63abbc29d0c4c19ee_4358	6db8800965c51df47e711e72bf22185f_4611	0ed7320c6f511ce95f40560feeb5531a_5498	K_pneumoniae_6_01554
nlpA		lipoprotein NlpA	6	6	1	1	4865				809	809	809	a177eae4552a0a1383f611870b669525_166	40b06fe84ca1b8758d0c3f8a0dea34af_9967	20e8a30293b7b0c63abbc29d0c4c19ee_7435	6db8800965c51df47e711e72bf22185f_7662	0ed7320c6f511ce95f40560feeb5531a_7559	K_pneumoniae_6_03611
WP_004145727.1		carboxymuconolactone decarboxylase family protein	6	6	1	1	2004				431	431	431	a177eae4552a0a1383f611870b669525_2299	40b06fe84ca1b8758d0c3f8a0dea34af_1683	20e8a30293b7b0c63abbc29d0c4c19ee_3258	6db8800965c51df47e711e72bf22185f_3695	0ed7320c6f511ce95f40560feeb5531a_4174	K_pneumoniae_6_02444
WP_002906776.1		LysR family transcriptional regulator	6	6	1	1	5710				887	887	887	a177eae4552a0a1383f611870b669525_5037	40b06fe84ca1b8758d0c3f8a0dea34af_5094	20e8a30293b7b0c63abbc29d0c4c19ee_2630	6db8800965c51df47e711e72bf22185f_2630	0ed7320c6f511ce95f40560feeb5531a_3296	K_pneumoniae_6_02033
WP_043906773.1		SOS response-associated peptidase	6	6	1	1	3772				674	674	674	a177eae4552a0a1383f611870b669525_5736	40b06fe84ca1b8758d0c3f8a0dea34af_4393	20e8a30293b7b0c63abbc29d0c4c19ee_10251	6db8800965c51df47e711e72bf22185f_10336	0ed7320c6f511ce95f40560feeb5531a_8501	K_pneumoniae_6_03767
WP_004178400.1		NAD(P)-dependent alcohol dehydrogenase	6	6	1	1	5876				1019	1019	1019	a177eae4552a0a1383f611870b669525_9276	40b06fe84ca1b8758d0c3f8a0dea34af_8746	20e8a30293b7b0c63abbc29d0c4c19ee_4416	6db8800965c51df47e711e72bf22185f_4553	0ed7320c6f511ce95f40560feeb5531a_5556	K_pneumoniae_6_01526
WP_004151114.1		SulP family inorganic anion transporter	6	6	1	1	530				1160	1238	1173	a177eae4552a0a1383f611870b669525_3131	40b06fe84ca1b8758d0c3f8a0dea34af_2605	20e8a30293b7b0c63abbc29d0c4c19ee_744	6db8800965c51df47e711e72bf22185f_1739	0ed7320c6f511ce95f40560feeb5531a_2218	K_pneumoniae_6_01142
group_1220	dksA	RNA polymerase-binding protein DksA	6	6	1	1	1629				455	455	455	a177eae4552a0a1383f611870b669525_8650	40b06fe84ca1b8758d0c3f8a0dea34af_8120	20e8a30293b7b0c63abbc29d0c4c19ee_4615	6db8800965c51df47e711e72bf22185f_4354	0ed7320c6f511ce95f40560feeb5531a_4833	K_pneumoniae_6_02761
ispD		2-C-methyl-D-erythritol 4-phosphate cytidylyltransferase	6	6	1	1	1901				710	710	710	a177eae4552a0a1383f611870b669525_2080	40b06fe84ca1b8758d0c3f8a0dea34af_1464	20e8a30293b7b0c63abbc29d0c4c19ee_3479	6db8800965c51df47e711e72bf22185f_3476	0ed7320c6f511ce95f40560feeb5531a_3955	K_pneumoniae_6_02337
ppiB		peptidylprolyl isomerase B	6	6	1	1	1292				494	494	494	a177eae4552a0a1383f611870b669525_7946	40b06fe84ca1b8758d0c3f8a0dea34af_7416	20e8a30293b7b0c63abbc29d0c4c19ee_1435	6db8800965c51df47e711e72bf22185f_543	0ed7320c6f511ce95f40560feeb5531a_543	K_pneumoniae_6_00753
WP_004178295.1		fimbrial protein	6	6	1	1	127				551	551	551	a177eae4552a0a1383f611870b669525_9702	40b06fe84ca1b8758d0c3f8a0dea34af_9172	20e8a30293b7b0c63abbc29d0c4c19ee_3990	6db8800965c51df47e711e72bf22185f_4979	0ed7320c6f511ce95f40560feeb5531a_5130	K_pneumoniae_6_01730
aqpZ		aquaporin Z	6	6	1	1	870				695	695	695	a177eae4552a0a1383f611870b669525_7050	40b06fe84ca1b8758d0c3f8a0dea34af_6520	20e8a30293b7b0c63abbc29d0c4c19ee_2331	6db8800965c51df47e711e72bf22185f_1439	0ed7320c6f511ce95f40560feeb5531a_1439	K_pneumoniae_6_00320
WP_002917916.1		YqjD family protein	6	6	1	1	4985				305	305	305	a177eae4552a0a1383f611870b669525_1216	40b06fe84ca1b8758d0c3f8a0dea34af_595	20e8a30293b7b0c63abbc29d0c4c19ee_6104	6db8800965c51df47e711e72bf22185f_6164	0ed7320c6f511ce95f40560feeb5531a_6567	K_pneumoniae_6_03539
lolB		lipoprotein insertase outer membrane protein LolB	6	6	1	1	4661				611	611	611	a177eae4552a0a1383f611870b669525_4269	40b06fe84ca1b8758d0c3f8a0dea34af_3664	20e8a30293b7b0c63abbc29d0c4c19ee_10057	6db8800965c51df47e711e72bf22185f_10121	0ed7320c6f511ce95f40560feeb5531a_6404	K_pneumoniae_6_03257
argO		arginine exporter ArgO	6	6	1	1	4624				635	635	635	a177eae4552a0a1383f611870b669525_1567	40b06fe84ca1b8758d0c3f8a0dea34af_951	20e8a30293b7b0c63abbc29d0c4c19ee_9385	6db8800965c51df47e711e72bf22185f_9470	0ed7320c6f511ce95f40560feeb5531a_9768	K_pneumoniae_6_04672
WP_004177812.1		DUF485 domain-containing protein	6	6	1	1	124				311	311	311	a177eae4552a0a1383f611870b669525_9696	40b06fe84ca1b8758d0c3f8a0dea34af_9166	20e8a30293b7b0c63abbc29d0c4c19ee_3996	6db8800965c51df47e711e72bf22185f_4973	0ed7320c6f511ce95f40560feeb5531a_5136	K_pneumoniae_6_01727
WP_004181425.1		oxaloacetate decarboxylase subunit gamma	6	6	1	1	5086				251	251	251	a177eae4552a0a1383f611870b669525_1007	40b06fe84ca1b8758d0c3f8a0dea34af_386	20e8a30293b7b0c63abbc29d0c4c19ee_6313	6db8800965c51df47e711e72bf22185f_6373	0ed7320c6f511ce95f40560feeb5531a_6776	K_pneumoniae_6_03437
WP_004195346.1		YejL family protein	6	6	1	1	525				227	263	233	a177eae4552a0a1383f611870b669525_3144	40b06fe84ca1b8758d0c3f8a0dea34af_2618	20e8a30293b7b0c63abbc29d0c4c19ee_731	6db8800965c51df47e711e72bf22185f_1726	0ed7320c6f511ce95f40560feeb5531a_2205	K_pneumoniae_6_01136
pcaG		protocatechuate 3,4-dioxygenase subunit alpha	6	6	1	1	5759				620	620	620	a177eae4552a0a1383f611870b669525_4937	40b06fe84ca1b8758d0c3f8a0dea34af_5194	20e8a30293b7b0c63abbc29d0c4c19ee_2530	6db8800965c51df47e711e72bf22185f_2530	0ed7320c6f511ce95f40560feeb5531a_3396	K_pneumoniae_6_02078
WP_002886895.1		hypothetical protein	6	6	1	1	5926				362	362	362	a177eae4552a0a1383f611870b669525_9378	40b06fe84ca1b8758d0c3f8a0dea34af_8848	20e8a30293b7b0c63abbc29d0c4c19ee_4314	6db8800965c51df47e711e72bf22185f_4655	0ed7320c6f511ce95f40560feeb5531a_5454	K_pneumoniae_6_01575
nfi		deoxyribonuclease V	6	6	1	1	4924				671	671	671	a177eae4552a0a1383f611870b669525_9882	40b06fe84ca1b8758d0c3f8a0dea34af_9354	20e8a30293b7b0c63abbc29d0c4c19ee_10621	6db8800965c51df47e711e72bf22185f_10706	0ed7320c6f511ce95f40560feeb5531a_10658	K_pneumoniae_6_05092
malK		maltose/maltodextrin ABC transporter ATP-binding protein MalK	6	6	1	1	177				1109	1109	1109	a177eae4552a0a1383f611870b669525_9804	40b06fe84ca1b8758d0c3f8a0dea34af_9274	20e8a30293b7b0c63abbc29d0c4c19ee_3888	6db8800965c51df47e711e72bf22185f_5081	0ed7320c6f511ce95f40560feeb5531a_5028	K_pneumoniae_6_01779
WP_004181557.1		NUDIX hydrolase	6	6	1	1	4863				560	560	560	a177eae4552a0a1383f611870b669525_170	40b06fe84ca1b8758d0c3f8a0dea34af_9963	20e8a30293b7b0c63abbc29d0c4c19ee_7439	6db8800965c51df47e711e72bf22185f_7658	0ed7320c6f511ce95f40560feeb5531a_7563	K_pneumoniae_6_03613
WP_004149392.1		HlyC/CorC family transporter	6	6	1	1	2052				1286	1286	1286	a177eae4552a0a1383f611870b669525_2398	40b06fe84ca1b8758d0c3f8a0dea34af_1782	20e8a30293b7b0c63abbc29d0c4c19ee_3159	6db8800965c51df47e711e72bf22185f_3794	0ed7320c6f511ce95f40560feeb5531a_4273	K_pneumoniae_6_02493
WP_004181594.1		DUF3748 domain-containing protein	6	6	1	1	4782				1226	1226	1226	a177eae4552a0a1383f611870b669525_27	40b06fe84ca1b8758d0c3f8a0dea34af_10106	20e8a30293b7b0c63abbc29d0c4c19ee_9766	6db8800965c51df47e711e72bf22185f_9851	0ed7320c6f511ce95f40560feeb5531a_10140	K_pneumoniae_6_01458
hisP		histidine ABC transporter ATP-binding protein HisP	6	6	1	1	595				773	773	773	a177eae4552a0a1383f611870b669525_2999	40b06fe84ca1b8758d0c3f8a0dea34af_2473	20e8a30293b7b0c63abbc29d0c4c19ee_876	6db8800965c51df47e711e72bf22185f_1871	0ed7320c6f511ce95f40560feeb5531a_2350	K_pneumoniae_6_01208
WP_004178481.1		NAD(P)H-dependent oxidoreductase	6	6	1	1	1867				782	782	782	a177eae4552a0a1383f611870b669525_9145	40b06fe84ca1b8758d0c3f8a0dea34af_8615	20e8a30293b7b0c63abbc29d0c4c19ee_10969	6db8800965c51df47e711e72bf22185f_3859	0ed7320c6f511ce95f40560feeb5531a_4338	K_pneumoniae_6_02524
WP_004178526.1		sigma-54-dependent transcriptional regulator	6	6	1	1	1819				2765	2765	2765	a177eae4552a0a1383f611870b669525_9047	40b06fe84ca1b8758d0c3f8a0dea34af_8517	20e8a30293b7b0c63abbc29d0c4c19ee_5012	6db8800965c51df47e711e72bf22185f_3957	0ed7320c6f511ce95f40560feeb5531a_4436	K_pneumoniae_6_02571
WP_002912760.1		sensor histidine kinase	6	6	1	1	464				1688	1724	1694	a177eae4552a0a1383f611870b669525_3264	40b06fe84ca1b8758d0c3f8a0dea34af_2740	20e8a30293b7b0c63abbc29d0c4c19ee_611	6db8800965c51df47e711e72bf22185f_1606	0ed7320c6f511ce95f40560feeb5531a_2085	K_pneumoniae_6_01076
rapZ		RNase adapter RapZ	6	6	1	1	5062				854	854	854	a177eae4552a0a1383f611870b669525_1055	40b06fe84ca1b8758d0c3f8a0dea34af_434	20e8a30293b7b0c63abbc29d0c4c19ee_6265	6db8800965c51df47e711e72bf22185f_6325	0ed7320c6f511ce95f40560feeb5531a_6728	K_pneumoniae_6_03460
WP_002907776.1		YnhF family membrane protein	6	6	1	1	5807				92	92	92	a177eae4552a0a1383f611870b669525_4841	40b06fe84ca1b8758d0c3f8a0dea34af_5290	20e8a30293b7b0c63abbc29d0c4c19ee_2434	6db8800965c51df47e711e72bf22185f_2434	0ed7320c6f511ce95f40560feeb5531a_3492	K_pneumoniae_6_02126
WP_002922908.1		YiiQ family protein	6	6	1	1	4840				602	602	602	a177eae4552a0a1383f611870b669525_219	40b06fe84ca1b8758d0c3f8a0dea34af_9914	20e8a30293b7b0c63abbc29d0c4c19ee_7488	6db8800965c51df47e711e72bf22185f_7609	0ed7320c6f511ce95f40560feeb5531a_7612	K_pneumoniae_6_03637
hns		DNA-binding transcriptional regulator H-NS	6	6	1	1	273				410	410	410	a177eae4552a0a1383f611870b669525_4361	40b06fe84ca1b8758d0c3f8a0dea34af_3753	20e8a30293b7b0c63abbc29d0c4c19ee_7932	6db8800965c51df47e711e72bf22185f_7744	0ed7320c6f511ce95f40560feeb5531a_6315	K_pneumoniae_6_03997
group_1244	tssK	type VI secretion system baseplate subunit TssK	6	6	1	1	4435				1340	1340	1340	a177eae4552a0a1383f611870b669525_1951	40b06fe84ca1b8758d0c3f8a0dea34af_1335	20e8a30293b7b0c63abbc29d0c4c19ee_3608	6db8800965c51df47e711e72bf22185f_3347	0ed7320c6f511ce95f40560feeb5531a_3826	K_pneumoniae_6_02276
WP_002912929.1		amino acid permease	6	6	1	1	495				1469	1469	1469	a177eae4552a0a1383f611870b669525_3204	40b06fe84ca1b8758d0c3f8a0dea34af_2678	20e8a30293b7b0c63abbc29d0c4c19ee_671	6db8800965c51df47e711e72bf22185f_1666	0ed7320c6f511ce95f40560feeb5531a_2145	K_pneumoniae_6_01106
pldB		lysophospholipase L2	6	6	1	1	5182				992	992	992	a177eae4552a0a1383f611870b669525_10008	40b06fe84ca1b8758d0c3f8a0dea34af_9480	20e8a30293b7b0c63abbc29d0c4c19ee_8944	6db8800965c51df47e711e72bf22185f_9092	0ed7320c6f511ce95f40560feeb5531a_9475	K_pneumoniae_6_04467
hycC		formate hydrogenlyase subunit 3	6	6	1	1	1951				1826	1826	1826	a177eae4552a0a1383f611870b669525_2180	40b06fe84ca1b8758d0c3f8a0dea34af_1564	20e8a30293b7b0c63abbc29d0c4c19ee_3379	6db8800965c51df47e711e72bf22185f_3576	0ed7320c6f511ce95f40560feeb5531a_4055	K_pneumoniae_6_02386
WP_004176871.1		PhoH family protein	6	6	1	1	1083				1046	1046	1046	a177eae4552a0a1383f611870b669525_7521	40b06fe84ca1b8758d0c3f8a0dea34af_6991	20e8a30293b7b0c63abbc29d0c4c19ee_1860	6db8800965c51df47e711e72bf22185f_968	0ed7320c6f511ce95f40560feeb5531a_968	K_pneumoniae_6_00546
nrdF		class 1b ribonucleoside-diphosphate reductase subunit beta	6	6	1	1	2000				962	962	962	a177eae4552a0a1383f611870b669525_2291	40b06fe84ca1b8758d0c3f8a0dea34af_1675	20e8a30293b7b0c63abbc29d0c4c19ee_3266	6db8800965c51df47e711e72bf22185f_3687	0ed7320c6f511ce95f40560feeb5531a_4166	K_pneumoniae_6_02440
WP_019725442.1		universal stress protein	6	6	1	1	453				422	422	422	a177eae4552a0a1383f611870b669525_3286	40b06fe84ca1b8758d0c3f8a0dea34af_2762	20e8a30293b7b0c63abbc29d0c4c19ee_589	6db8800965c51df47e711e72bf22185f_1584	0ed7320c6f511ce95f40560feeb5531a_2063	K_pneumoniae_6_01065
WP_004140514.1		ferritin-like domain-containing protein	6	6	1	1	5284				506	506	506	a177eae4552a0a1383f611870b669525_6525	40b06fe84ca1b8758d0c3f8a0dea34af_5996	20e8a30293b7b0c63abbc29d0c4c19ee_8707	6db8800965c51df47e711e72bf22185f_8778	0ed7320c6f511ce95f40560feeb5531a_9238	K_pneumoniae_6_00066
mug		G/U mismatch-specific DNA glycosylase	6	6	1	1	3959				506	506	506	a177eae4552a0a1383f611870b669525_1321	40b06fe84ca1b8758d0c3f8a0dea34af_700	20e8a30293b7b0c63abbc29d0c4c19ee_5999	6db8800965c51df47e711e72bf22185f_6059	0ed7320c6f511ce95f40560feeb5531a_6462	K_pneumoniae_6_05292
rlmH		23S rRNA (pseudouridine(1915)-N(3))-methyltransferase RlmH	6	6	1	1	1100				467	467	467	a177eae4552a0a1383f611870b669525_7555	40b06fe84ca1b8758d0c3f8a0dea34af_7025	20e8a30293b7b0c63abbc29d0c4c19ee_1826	6db8800965c51df47e711e72bf22185f_934	0ed7320c6f511ce95f40560feeb5531a_934	K_pneumoniae_6_00563
fucR		L-fucose operon activator	6	6	1	1	4425				710	710	710	a177eae4552a0a1383f611870b669525_1980	40b06fe84ca1b8758d0c3f8a0dea34af_1364	20e8a30293b7b0c63abbc29d0c4c19ee_3579	6db8800965c51df47e711e72bf22185f_3376	0ed7320c6f511ce95f40560feeb5531a_3855	K_pneumoniae_6_02288
WP_004176254.1		LacI family DNA-binding transcriptional regulator	6	6	1	1	3748				1064	1064	1064	a177eae4552a0a1383f611870b669525_5688	40b06fe84ca1b8758d0c3f8a0dea34af_4441	20e8a30293b7b0c63abbc29d0c4c19ee_10299	6db8800965c51df47e711e72bf22185f_10384	0ed7320c6f511ce95f40560feeb5531a_8549	K_pneumoniae_6_03787
atpE		F0F1 ATP synthase subunit C	6	6	1	1	2943				239	239	239	a177eae4552a0a1383f611870b669525_10372	40b06fe84ca1b8758d0c3f8a0dea34af_9844	20e8a30293b7b0c63abbc29d0c4c19ee_10567	6db8800965c51df47e711e72bf22185f_10652	0ed7320c6f511ce95f40560feeb5531a_10600	K_pneumoniae_6_05050
agp		bifunctional glucose-1-phosphatase/inositol phosphatase	6	6	1	1	4294				1247	1247	1247	a177eae4552a0a1383f611870b669525_6793	40b06fe84ca1b8758d0c3f8a0dea34af_6261	20e8a30293b7b0c63abbc29d0c4c19ee_5319	6db8800965c51df47e711e72bf22185f_5343	0ed7320c6f511ce95f40560feeb5531a_5822	K_pneumoniae_6_00191
eutT		ethanolamine utilization cob(I)yrinic acid a,c-diamide adenosyltransferase EutT	6	6	1	1	689				806	806	806	a177eae4552a0a1383f611870b669525_2791	40b06fe84ca1b8758d0c3f8a0dea34af_2265	20e8a30293b7b0c63abbc29d0c4c19ee_1084	6db8800965c51df47e711e72bf22185f_2079	0ed7320c6f511ce95f40560feeb5531a_2558	K_pneumoniae_6_01304
WP_043906948.1		hypothetical protein	6	6	1	1	813				365	365	365	a177eae4552a0a1383f611870b669525_2541	40b06fe84ca1b8758d0c3f8a0dea34af_2011	20e8a30293b7b0c63abbc29d0c4c19ee_1334	6db8800965c51df47e711e72bf22185f_2329	0ed7320c6f511ce95f40560feeb5531a_2808	K_pneumoniae_6_01426
WP_002917670.1		glycerol dehydratase small subunit DhaB3	6	6	1	1	3967				425	425	425	a177eae4552a0a1383f611870b669525_1298	40b06fe84ca1b8758d0c3f8a0dea34af_677	20e8a30293b7b0c63abbc29d0c4c19ee_6022	6db8800965c51df47e711e72bf22185f_6082	0ed7320c6f511ce95f40560feeb5531a_6485	K_pneumoniae_6_03579
WP_004233249.1		dicarboxylate/amino acid:cation symporter	6	6	1	1	3625				1232	1274	1253	a177eae4552a0a1383f611870b669525_3341	40b06fe84ca1b8758d0c3f8a0dea34af_2817	20e8a30293b7b0c63abbc29d0c4c19ee_534	6db8800965c51df47e711e72bf22185f_1529	0ed7320c6f511ce95f40560feeb5531a_2008	K_pneumoniae_6_01038
WP_004181529.1		glycosyltransferase family 2 protein	6	6	1	1	221				776	776	776	a177eae4552a0a1383f611870b669525_281	40b06fe84ca1b8758d0c3f8a0dea34af_10200	20e8a30293b7b0c63abbc29d0c4c19ee_7550	6db8800965c51df47e711e72bf22185f_7547	0ed7320c6f511ce95f40560feeb5531a_7674	K_pneumoniae_6_03667
WP_004179531.1		SDR family oxidoreductase	6	6	1	1	3285				761	761	761	a177eae4552a0a1383f611870b669525_6134	40b06fe84ca1b8758d0c3f8a0dea34af_5525	20e8a30293b7b0c63abbc29d0c4c19ee_6722	6db8800965c51df47e711e72bf22185f_6487	0ed7320c6f511ce95f40560feeb5531a_10896	K_pneumoniae_6_03072
WP_016529582.1		hypothetical protein	6	6	1	1	2263				461	461	461	a177eae4552a0a1383f611870b669525_3913	40b06fe84ca1b8758d0c3f8a0dea34af_3310	20e8a30293b7b0c63abbc29d0c4c19ee_41	6db8800965c51df47e711e72bf22185f_6003	0ed7320c6f511ce95f40560feeb5531a_1515	K_pneumoniae_6_00806
WP_004179487.1		helix-turn-helix domain-containing protein	6	6	1	1	3250				2321	2321	2321	a177eae4552a0a1383f611870b669525_6216	40b06fe84ca1b8758d0c3f8a0dea34af_5607	20e8a30293b7b0c63abbc29d0c4c19ee_6640	6db8800965c51df47e711e72bf22185f_6569	0ed7320c6f511ce95f40560feeb5531a_7435	K_pneumoniae_6_03111
WP_004178875.1		HlyD family secretion protein	6	6	1	1	1259				1142	1142	1142	a177eae4552a0a1383f611870b669525_7873	40b06fe84ca1b8758d0c3f8a0dea34af_7343	20e8a30293b7b0c63abbc29d0c4c19ee_1508	6db8800965c51df47e711e72bf22185f_616	0ed7320c6f511ce95f40560feeb5531a_616	K_pneumoniae_6_00720
rnd		ribonuclease D	6	6	1	1	4685				1115	1115	1115	a177eae4552a0a1383f611870b669525_4101	40b06fe84ca1b8758d0c3f8a0dea34af_3496	20e8a30293b7b0c63abbc29d0c4c19ee_9113	6db8800965c51df47e711e72bf22185f_9416	0ed7320c6f511ce95f40560feeb5531a_7902	K_pneumoniae_6_03333
WP_002907644.1		hypothetical protein	6	6	1	1	5766				185	185	185	a177eae4552a0a1383f611870b669525_4923	40b06fe84ca1b8758d0c3f8a0dea34af_5208	20e8a30293b7b0c63abbc29d0c4c19ee_2516	6db8800965c51df47e711e72bf22185f_2516	0ed7320c6f511ce95f40560feeb5531a_3410	K_pneumoniae_6_02085
WP_004180069.1		YmjA family protein	6	6	1	1	5646				245	245	245	a177eae4552a0a1383f611870b669525_5163	40b06fe84ca1b8758d0c3f8a0dea34af_4968	20e8a30293b7b0c63abbc29d0c4c19ee_2756	6db8800965c51df47e711e72bf22185f_2756	0ed7320c6f511ce95f40560feeb5531a_3170	K_pneumoniae_6_01972
tatC		Sec-independent protein translocase subunit TatC	6	6	1	1	5195				779	779	779	a177eae4552a0a1383f611870b669525_9982	40b06fe84ca1b8758d0c3f8a0dea34af_9454	20e8a30293b7b0c63abbc29d0c4c19ee_8918	6db8800965c51df47e711e72bf22185f_9118	0ed7320c6f511ce95f40560feeb5531a_9449	K_pneumoniae_6_04454
sthA		Si-specific NAD(P)(+) transhydrogenase	6	6	1	1	3010				1400	1400	1400	a177eae4552a0a1383f611870b669525_10162	40b06fe84ca1b8758d0c3f8a0dea34af_9634	20e8a30293b7b0c63abbc29d0c4c19ee_8554	6db8800965c51df47e711e72bf22185f_8625	0ed7320c6f511ce95f40560feeb5531a_8936	K_pneumoniae_6_04438
alkA		DNA-3-methyladenine glycosylase 2	6	6	1	1	3631				848	848	848	a177eae4552a0a1383f611870b669525_3353	40b06fe84ca1b8758d0c3f8a0dea34af_2829	20e8a30293b7b0c63abbc29d0c4c19ee_522	6db8800965c51df47e711e72bf22185f_1517	0ed7320c6f511ce95f40560feeb5531a_1996	K_pneumoniae_6_01032
WP_002899273.1		Maf-like protein	6	6	1	1	4351				584	584	584	a177eae4552a0a1383f611870b669525_6669	40b06fe84ca1b8758d0c3f8a0dea34af_6140	20e8a30293b7b0c63abbc29d0c4c19ee_5198	6db8800965c51df47e711e72bf22185f_5222	0ed7320c6f511ce95f40560feeb5531a_5701	K_pneumoniae_6_00134
WP_004178743.1		Gfo/Idh/MocA family oxidoreductase	6	6	1	1	1394				1178	1178	1178	a177eae4552a0a1383f611870b669525_8154	40b06fe84ca1b8758d0c3f8a0dea34af_7624	20e8a30293b7b0c63abbc29d0c4c19ee_5872	6db8800965c51df47e711e72bf22185f_335	0ed7320c6f511ce95f40560feeb5531a_335	K_pneumoniae_6_02895
paaY		phenylacetic acid degradation protein PaaY	6	6	1	1	4082				596	596	596	a177eae4552a0a1383f611870b669525_5968	40b06fe84ca1b8758d0c3f8a0dea34af_4159	20e8a30293b7b0c63abbc29d0c4c19ee_6954	6db8800965c51df47e711e72bf22185f_6946	0ed7320c6f511ce95f40560feeb5531a_7058	K_pneumoniae_6_04069
lspA		signal peptidase II	6	6	1	1	1744				500	500	500	a177eae4552a0a1383f611870b669525_8883	40b06fe84ca1b8758d0c3f8a0dea34af_8353	20e8a30293b7b0c63abbc29d0c4c19ee_4848	6db8800965c51df47e711e72bf22185f_4121	0ed7320c6f511ce95f40560feeb5531a_4600	K_pneumoniae_6_02647
fhuF		siderophore-iron reductase FhuF	6	6	1	1	1799				788	788	788	a177eae4552a0a1383f611870b669525_9007	40b06fe84ca1b8758d0c3f8a0dea34af_8477	20e8a30293b7b0c63abbc29d0c4c19ee_4972	6db8800965c51df47e711e72bf22185f_3997	0ed7320c6f511ce95f40560feeb5531a_4476	K_pneumoniae_6_02591
pstB		phosphate ABC transporter ATP-binding protein PstB	6	6	1	1	4755				773	773	773	a177eae4552a0a1383f611870b669525_10426	40b06fe84ca1b8758d0c3f8a0dea34af_10164	20e8a30293b7b0c63abbc29d0c4c19ee_9824	6db8800965c51df47e711e72bf22185f_9909	0ed7320c6f511ce95f40560feeb5531a_10082	K_pneumoniae_6_01431
WP_043906738.1		hypothetical protein	6	6	1	1	2270				602	602	602	a177eae4552a0a1383f611870b669525_3901	40b06fe84ca1b8758d0c3f8a0dea34af_3298	20e8a30293b7b0c63abbc29d0c4c19ee_53	6db8800965c51df47e711e72bf22185f_5991	0ed7320c6f511ce95f40560feeb5531a_1527	K_pneumoniae_6_00812
hemX		uroporphyrinogen-III C-methyltransferase	6	6	1	1	2970				1181	1181	1181	a177eae4552a0a1383f611870b669525_10046	40b06fe84ca1b8758d0c3f8a0dea34af_9518	20e8a30293b7b0c63abbc29d0c4c19ee_8982	6db8800965c51df47e711e72bf22185f_9054	0ed7320c6f511ce95f40560feeb5531a_9513	K_pneumoniae_6_04486
WP_004142240.1		MFS transporter	6	6	1	1	1055				1478	1478	1478	a177eae4552a0a1383f611870b669525_7442	40b06fe84ca1b8758d0c3f8a0dea34af_6912	20e8a30293b7b0c63abbc29d0c4c19ee_1939	6db8800965c51df47e711e72bf22185f_1047	0ed7320c6f511ce95f40560feeb5531a_1047	K_pneumoniae_6_00511
WP_004178546.1		metal-dependent hydrolase	6	6	1	1	1788				794	794	794	a177eae4552a0a1383f611870b669525_8974	40b06fe84ca1b8758d0c3f8a0dea34af_8444	20e8a30293b7b0c63abbc29d0c4c19ee_4939	6db8800965c51df47e711e72bf22185f_4030	0ed7320c6f511ce95f40560feeb5531a_4509	K_pneumoniae_6_02605
WP_039819880.1		capsule assembly Wzi family protein	6	6	1	1	3638				1433	1433	1433	a177eae4552a0a1383f611870b669525_3367	40b06fe84ca1b8758d0c3f8a0dea34af_2845	20e8a30293b7b0c63abbc29d0c4c19ee_508	6db8800965c51df47e711e72bf22185f_1503	0ed7320c6f511ce95f40560feeb5531a_1982	K_pneumoniae_6_01025
WP_004151747.1		CsbD family protein	6	6	1	1	168				209	209	209	a177eae4552a0a1383f611870b669525_9784	40b06fe84ca1b8758d0c3f8a0dea34af_9254	20e8a30293b7b0c63abbc29d0c4c19ee_3908	6db8800965c51df47e711e72bf22185f_5061	0ed7320c6f511ce95f40560feeb5531a_5048	K_pneumoniae_6_01770
WP_004179261.1		[formate-C-acetyltransferase]-activating enzyme	6	6	1	1	4272				875	875	875	a177eae4552a0a1383f611870b669525_6835	40b06fe84ca1b8758d0c3f8a0dea34af_6303	20e8a30293b7b0c63abbc29d0c4c19ee_5361	6db8800965c51df47e711e72bf22185f_5385	0ed7320c6f511ce95f40560feeb5531a_5864	K_pneumoniae_6_00213
WP_004178479.1		ABC transporter permease	6	6	1	1	1868				956	956	956	a177eae4552a0a1383f611870b669525_9147	40b06fe84ca1b8758d0c3f8a0dea34af_8617	20e8a30293b7b0c63abbc29d0c4c19ee_10971	6db8800965c51df47e711e72bf22185f_3857	0ed7320c6f511ce95f40560feeb5531a_4336	K_pneumoniae_6_02523
ugpC		sn-glycerol-3-phosphate ABC transporter ATP-binding protein UgpC	6	6	1	1	1349				1109	1109	1109	a177eae4552a0a1383f611870b669525_8061	40b06fe84ca1b8758d0c3f8a0dea34af_7531	20e8a30293b7b0c63abbc29d0c4c19ee_5965	6db8800965c51df47e711e72bf22185f_428	0ed7320c6f511ce95f40560feeb5531a_428	K_pneumoniae_6_02849
dhaM		dihydroxyacetone kinase subunit DhaM	6	6	1	1	4956				1421	1421	1421	a177eae4552a0a1383f611870b669525_1274	40b06fe84ca1b8758d0c3f8a0dea34af_653	20e8a30293b7b0c63abbc29d0c4c19ee_6046	6db8800965c51df47e711e72bf22185f_6106	0ed7320c6f511ce95f40560feeb5531a_6509	K_pneumoniae_6_03568
WP_002921273.1		glutathione S-transferase	6	6	1	1	3402				623	623	623	a177eae4552a0a1383f611870b669525_502	40b06fe84ca1b8758d0c3f8a0dea34af_10421	20e8a30293b7b0c63abbc29d0c4c19ee_8872	6db8800965c51df47e711e72bf22185f_8943	0ed7320c6f511ce95f40560feeb5531a_9318	K_pneumoniae_6_04583
lpxB		lipid-A-disaccharide synthase	6	6	1	1	1577				1151	1151	1151	a177eae4552a0a1383f611870b669525_8544	40b06fe84ca1b8758d0c3f8a0dea34af_8014	20e8a30293b7b0c63abbc29d0c4c19ee_4509	6db8800965c51df47e711e72bf22185f_4460	0ed7320c6f511ce95f40560feeb5531a_4939	K_pneumoniae_6_02811
astE		succinylglutamate desuccinylase	6	6	1	1	4099				995	995	995	a177eae4552a0a1383f611870b669525_5934	40b06fe84ca1b8758d0c3f8a0dea34af_4195	20e8a30293b7b0c63abbc29d0c4c19ee_6920	6db8800965c51df47e711e72bf22185f_6980	0ed7320c6f511ce95f40560feeb5531a_7024	K_pneumoniae_6_04085
WP_004178740.1		SRPBCC family protein	6	6	1	1	1399				476	476	476	a177eae4552a0a1383f611870b669525_8164	40b06fe84ca1b8758d0c3f8a0dea34af_7634	20e8a30293b7b0c63abbc29d0c4c19ee_5862	6db8800965c51df47e711e72bf22185f_325	0ed7320c6f511ce95f40560feeb5531a_325	K_pneumoniae_6_02900
tgt		tRNA guanosine(34) transglycosylase Tgt	6	6	1	1	1418				1127	1127	1127	a177eae4552a0a1383f611870b669525_8202	40b06fe84ca1b8758d0c3f8a0dea34af_7672	20e8a30293b7b0c63abbc29d0c4c19ee_5824	6db8800965c51df47e711e72bf22185f_287	0ed7320c6f511ce95f40560feeb5531a_287	K_pneumoniae_6_02919
WP_038435507.1		polysaccharide export protein	6	6	1	1	3642				1136	1136	1136	a177eae4552a0a1383f611870b669525_3369	40b06fe84ca1b8758d0c3f8a0dea34af_2847	20e8a30293b7b0c63abbc29d0c4c19ee_506	6db8800965c51df47e711e72bf22185f_1501	0ed7320c6f511ce95f40560feeb5531a_1980	K_pneumoniae_6_01024
WP_004181145.1		hypothetical protein	6	6	1	1	4439				1781	1781	1781	a177eae4552a0a1383f611870b669525_1943	40b06fe84ca1b8758d0c3f8a0dea34af_1327	20e8a30293b7b0c63abbc29d0c4c19ee_3616	6db8800965c51df47e711e72bf22185f_3339	0ed7320c6f511ce95f40560feeb5531a_3818	K_pneumoniae_6_02272
msyB		acidic protein MsyB	6	6	1	1	1753				749	749	749	a177eae4552a0a1383f611870b669525_8903	40b06fe84ca1b8758d0c3f8a0dea34af_8373	20e8a30293b7b0c63abbc29d0c4c19ee_4868	6db8800965c51df47e711e72bf22185f_4101	0ed7320c6f511ce95f40560feeb5531a_4580	K_pneumoniae_6_02638
ygiD		4,5-DOPA dioxygenase extradiol	6	6	1	1	3834				791	791	791	a177eae4552a0a1383f611870b669525_1380	40b06fe84ca1b8758d0c3f8a0dea34af_759	20e8a30293b7b0c63abbc29d0c4c19ee_10694	6db8800965c51df47e711e72bf22185f_10790	0ed7320c6f511ce95f40560feeb5531a_10731	K_pneumoniae_6_05116
WP_043906838.1		TetR/AcrR family transcriptional regulator	6	6	1	1	1218				581	581	581	a177eae4552a0a1383f611870b669525_7791	40b06fe84ca1b8758d0c3f8a0dea34af_7261	20e8a30293b7b0c63abbc29d0c4c19ee_1590	6db8800965c51df47e711e72bf22185f_698	0ed7320c6f511ce95f40560feeb5531a_698	K_pneumoniae_6_00681
nadE		ammonia-dependent NAD(+) synthetase	6	6	1	1	2193				827	827	827	a177eae4552a0a1383f611870b669525_6369	40b06fe84ca1b8758d0c3f8a0dea34af_5760	20e8a30293b7b0c63abbc29d0c4c19ee_6487	6db8800965c51df47e711e72bf22185f_6722	0ed7320c6f511ce95f40560feeb5531a_7282	K_pneumoniae_6_03184
iscU		Fe-S cluster assembly scaffold IscU	6	6	1	1	779				386	386	386	a177eae4552a0a1383f611870b669525_2609	40b06fe84ca1b8758d0c3f8a0dea34af_2083	20e8a30293b7b0c63abbc29d0c4c19ee_1266	6db8800965c51df47e711e72bf22185f_2261	0ed7320c6f511ce95f40560feeb5531a_2740	K_pneumoniae_6_01392
csdE		cysteine desulfurase sulfur acceptor subunit CsdE	6	6	1	1	4431				431	431	431	a177eae4552a0a1383f611870b669525_1968	40b06fe84ca1b8758d0c3f8a0dea34af_1352	20e8a30293b7b0c63abbc29d0c4c19ee_3591	6db8800965c51df47e711e72bf22185f_3364	0ed7320c6f511ce95f40560feeb5531a_3843	K_pneumoniae_6_02282
surA		peptidylprolyl isomerase SurA	6	6	1	1	1726				1286	1286	1286	a177eae4552a0a1383f611870b669525_8847	40b06fe84ca1b8758d0c3f8a0dea34af_8317	20e8a30293b7b0c63abbc29d0c4c19ee_4812	6db8800965c51df47e711e72bf22185f_4157	0ed7320c6f511ce95f40560feeb5531a_4636	K_pneumoniae_6_02665
WP_004179922.1		fructose PTS transporter subunit IIB	6	6	1	1	5538				311	311	311	a177eae4552a0a1383f611870b669525_5382	40b06fe84ca1b8758d0c3f8a0dea34af_4749	20e8a30293b7b0c63abbc29d0c4c19ee_2976	6db8800965c51df47e711e72bf22185f_2976	0ed7320c6f511ce95f40560feeb5531a_2950	K_pneumoniae_6_01870
rpiA		ribose-5-phosphate isomerase RpiA	6	6	1	1	4621				659	659	659	a177eae4552a0a1383f611870b669525_1573	40b06fe84ca1b8758d0c3f8a0dea34af_957	20e8a30293b7b0c63abbc29d0c4c19ee_9391	6db8800965c51df47e711e72bf22185f_9476	0ed7320c6f511ce95f40560feeb5531a_9774	K_pneumoniae_6_04675
WP_015056399.1		ATP-binding protein	6	7	1.17	1	3415				326	1448	1186	a177eae4552a0a1383f611870b669525_536	40b06fe84ca1b8758d0c3f8a0dea34af_10455 40b06fe84ca1b8758d0c3f8a0dea34af_10447	20e8a30293b7b0c63abbc29d0c4c19ee_7373	6db8800965c51df47e711e72bf22185f_7150	0ed7320c6f511ce95f40560feeb5531a_10468	K_pneumoniae_6_04981
hspQ		heat shock protein HspQ	6	6	1	1	4254				317	317	317	a177eae4552a0a1383f611870b669525_6876	40b06fe84ca1b8758d0c3f8a0dea34af_6346	20e8a30293b7b0c63abbc29d0c4c19ee_5402	6db8800965c51df47e711e72bf22185f_5426	0ed7320c6f511ce95f40560feeb5531a_5905	K_pneumoniae_6_00232
WP_002887559.1		MurR/RpiR family transcriptional regulator	6	6	1	1	1822				863	863	863	a177eae4552a0a1383f611870b669525_9053	40b06fe84ca1b8758d0c3f8a0dea34af_8523	20e8a30293b7b0c63abbc29d0c4c19ee_5018	6db8800965c51df47e711e72bf22185f_3951	0ed7320c6f511ce95f40560feeb5531a_4430	K_pneumoniae_6_02568
rarA		replication-associated recombination protein RarA	6	6	1	1	3796				1343	1343	1343	a177eae4552a0a1383f611870b669525_7020	40b06fe84ca1b8758d0c3f8a0dea34af_6490	20e8a30293b7b0c63abbc29d0c4c19ee_10833	6db8800965c51df47e711e72bf22185f_1469	0ed7320c6f511ce95f40560feeb5531a_1469	K_pneumoniae_6_00305
WP_004180250.1		LysR family transcriptional regulator	6	6	1	1	3989				890	890	890	a177eae4552a0a1383f611870b669525_4691	40b06fe84ca1b8758d0c3f8a0dea34af_5441	20e8a30293b7b0c63abbc29d0c4c19ee_10379	6db8800965c51df47e711e72bf22185f_10464	0ed7320c6f511ce95f40560feeb5531a_10526	K_pneumoniae_6_05012
group_1304	yfaE	class I ribonucleotide reductase maintenance protein YfaE	6	6	1	1	544				254	254	254	a177eae4552a0a1383f611870b669525_3103	40b06fe84ca1b8758d0c3f8a0dea34af_2577	20e8a30293b7b0c63abbc29d0c4c19ee_772	6db8800965c51df47e711e72bf22185f_1767	0ed7320c6f511ce95f40560feeb5531a_2246	K_pneumoniae_6_01156
WP_004150817.1		TonB-dependent siderophore receptor	6	6	1	1	4374				2189	2189	2189	a177eae4552a0a1383f611870b669525_6623	40b06fe84ca1b8758d0c3f8a0dea34af_6094	20e8a30293b7b0c63abbc29d0c4c19ee_5152	6db8800965c51df47e711e72bf22185f_5176	0ed7320c6f511ce95f40560feeb5531a_5655	K_pneumoniae_6_00111
uhpA		transcriptional regulator UhpA	6	6	1	1	4806				593	593	593	a177eae4552a0a1383f611870b669525_76	40b06fe84ca1b8758d0c3f8a0dea34af_10057	20e8a30293b7b0c63abbc29d0c4c19ee_9717	6db8800965c51df47e711e72bf22185f_9802	0ed7320c6f511ce95f40560feeb5531a_10189	K_pneumoniae_6_01480
WP_002922950.1		uracil-xanthine permease family protein	6	6	1	1	4849				1391	1391	1391	a177eae4552a0a1383f611870b669525_201	40b06fe84ca1b8758d0c3f8a0dea34af_9932	20e8a30293b7b0c63abbc29d0c4c19ee_7470	6db8800965c51df47e711e72bf22185f_7627	0ed7320c6f511ce95f40560feeb5531a_7594	K_pneumoniae_6_03628
pspF		phage shock protein operon transcriptional activator	6	6	1	1	3253				989	989	989	a177eae4552a0a1383f611870b669525_6210	40b06fe84ca1b8758d0c3f8a0dea34af_5601	20e8a30293b7b0c63abbc29d0c4c19ee_6646	6db8800965c51df47e711e72bf22185f_6563	0ed7320c6f511ce95f40560feeb5531a_7441	K_pneumoniae_6_03108
WP_002895749.1		MFS transporter	6	6	1	1	958				1331	1331	1331	a177eae4552a0a1383f611870b669525_7222	40b06fe84ca1b8758d0c3f8a0dea34af_6692	20e8a30293b7b0c63abbc29d0c4c19ee_2159	6db8800965c51df47e711e72bf22185f_1267	0ed7320c6f511ce95f40560feeb5531a_1267	K_pneumoniae_6_00407
pdxK		pyridoxine/pyridoxal/pyridoxamine kinase	6	6	1	1	662				866	866	866	a177eae4552a0a1383f611870b669525_2847	40b06fe84ca1b8758d0c3f8a0dea34af_2321	20e8a30293b7b0c63abbc29d0c4c19ee_1028	6db8800965c51df47e711e72bf22185f_2023	0ed7320c6f511ce95f40560feeb5531a_2502	K_pneumoniae_6_01277
WP_002906697.1		amino acid ABC transporter ATP-binding protein	6	6	1	1	5702				779	779	779	a177eae4552a0a1383f611870b669525_5051	40b06fe84ca1b8758d0c3f8a0dea34af_5080	20e8a30293b7b0c63abbc29d0c4c19ee_2644	6db8800965c51df47e711e72bf22185f_2644	0ed7320c6f511ce95f40560feeb5531a_3282	K_pneumoniae_6_02025
bcsR		cellulose biosynthesis protein BcsR	6	6	1	1	3383				188	188	188	a177eae4552a0a1383f611870b669525_466	40b06fe84ca1b8758d0c3f8a0dea34af_10385	20e8a30293b7b0c63abbc29d0c4c19ee_8836	6db8800965c51df47e711e72bf22185f_8907	0ed7320c6f511ce95f40560feeb5531a_9354	K_pneumoniae_6_04564
lpxM		lauroyl-Kdo(2)-lipid IV(A) myristoyltransferase	6	6	1	1	5378				974	974	974	a177eae4552a0a1383f611870b669525_3995	40b06fe84ca1b8758d0c3f8a0dea34af_3386	20e8a30293b7b0c63abbc29d0c4c19ee_10497	6db8800965c51df47e711e72bf22185f_10548	0ed7320c6f511ce95f40560feeb5531a_8008	K_pneumoniae_6_03383
WP_004180092.1		1,6-dihydroxycyclohexa-2,4-diene-1-carboxylate dehydrogenase	6	6	1	1	5674				773	773	773	a177eae4552a0a1383f611870b669525_5107	40b06fe84ca1b8758d0c3f8a0dea34af_5024	20e8a30293b7b0c63abbc29d0c4c19ee_2700	6db8800965c51df47e711e72bf22185f_2700	0ed7320c6f511ce95f40560feeb5531a_3226	K_pneumoniae_6_01997
WP_004180263.1		hypothetical protein	6	6	1	1	4001				548	548	548	a177eae4552a0a1383f611870b669525_4667	40b06fe84ca1b8758d0c3f8a0dea34af_5465	20e8a30293b7b0c63abbc29d0c4c19ee_10403	6db8800965c51df47e711e72bf22185f_10488	0ed7320c6f511ce95f40560feeb5531a_10502	K_pneumoniae_6_05000
radC		DNA repair protein RadC	6	6	1	1	226				665	665	665	a177eae4552a0a1383f611870b669525_271	40b06fe84ca1b8758d0c3f8a0dea34af_10190	20e8a30293b7b0c63abbc29d0c4c19ee_7540	6db8800965c51df47e711e72bf22185f_7557	0ed7320c6f511ce95f40560feeb5531a_7664	K_pneumoniae_6_03662
group_1317	rfbA	glucose-1-phosphate thymidylyltransferase RfbA	6	6	1	1	2979				881	881	881	a177eae4552a0a1383f611870b669525_10076	40b06fe84ca1b8758d0c3f8a0dea34af_9548	20e8a30293b7b0c63abbc29d0c4c19ee_9012	6db8800965c51df47e711e72bf22185f_9024	0ed7320c6f511ce95f40560feeb5531a_9543	K_pneumoniae_6_04499
glmS		glutamine--fructose-6-phosphate transaminase (isomerizing)	6	6	1	1	2935				1829	1829	1829	a177eae4552a0a1383f611870b669525_10388	40b06fe84ca1b8758d0c3f8a0dea34af_9860	20e8a30293b7b0c63abbc29d0c4c19ee_10551	6db8800965c51df47e711e72bf22185f_10636	0ed7320c6f511ce95f40560feeb5531a_10616	K_pneumoniae_6_05058
WP_004152594.1		hypothetical protein	6	6	1	1	3122				404	404	404	a177eae4552a0a1383f611870b669525_10825	40b06fe84ca1b8758d0c3f8a0dea34af_10744	20e8a30293b7b0c63abbc29d0c4c19ee_9251	6db8800965c51df47e711e72bf22185f_9174	0ed7320c6f511ce95f40560feeb5531a_9722	K_pneumoniae_6_04650
stpA		DNA-binding protein StpA	6	6	1	1	2009				401	401	401	a177eae4552a0a1383f611870b669525_2309	40b06fe84ca1b8758d0c3f8a0dea34af_1693	20e8a30293b7b0c63abbc29d0c4c19ee_3248	6db8800965c51df47e711e72bf22185f_3705	0ed7320c6f511ce95f40560feeb5531a_4184	K_pneumoniae_6_02449
WP_004180116.1		helix-turn-helix domain-containing protein	6	6	1	1	5698				296	296	296	a177eae4552a0a1383f611870b669525_5059	40b06fe84ca1b8758d0c3f8a0dea34af_5072	20e8a30293b7b0c63abbc29d0c4c19ee_2652	6db8800965c51df47e711e72bf22185f_2652	0ed7320c6f511ce95f40560feeb5531a_3274	K_pneumoniae_6_02021
WP_004179099.1		ABC transporter permease	6	6	1	1	964				1106	1106	1106	a177eae4552a0a1383f611870b669525_7236	40b06fe84ca1b8758d0c3f8a0dea34af_6706	20e8a30293b7b0c63abbc29d0c4c19ee_2145	6db8800965c51df47e711e72bf22185f_1253	0ed7320c6f511ce95f40560feeb5531a_1253	K_pneumoniae_6_00413
oqxA		multidrug efflux RND transporter periplasmic adaptor subunit OqxA	6	6	1	1	2040				1175	1175	1175	a177eae4552a0a1383f611870b669525_2371	40b06fe84ca1b8758d0c3f8a0dea34af_1755	20e8a30293b7b0c63abbc29d0c4c19ee_3186	6db8800965c51df47e711e72bf22185f_3767	0ed7320c6f511ce95f40560feeb5531a_4246	K_pneumoniae_6_02480
WP_004178570.1		LysR family transcriptional regulator	6	6	1	1	1739				929	929	929	a177eae4552a0a1383f611870b669525_8873	40b06fe84ca1b8758d0c3f8a0dea34af_8343	20e8a30293b7b0c63abbc29d0c4c19ee_4838	6db8800965c51df47e711e72bf22185f_4131	0ed7320c6f511ce95f40560feeb5531a_4610	K_pneumoniae_6_02652
WP_004178301.1		ATP-binding protein	6	6	1	1	110				2285	2285	2285	a177eae4552a0a1383f611870b669525_9670	40b06fe84ca1b8758d0c3f8a0dea34af_9140	20e8a30293b7b0c63abbc29d0c4c19ee_4022	6db8800965c51df47e711e72bf22185f_4947	0ed7320c6f511ce95f40560feeb5531a_5162	K_pneumoniae_6_01714
WP_004179538.1		DJ-1/PfpI family protein	6	6	1	1	3283				566	566	566	a177eae4552a0a1383f611870b669525_6130	40b06fe84ca1b8758d0c3f8a0dea34af_5521	20e8a30293b7b0c63abbc29d0c4c19ee_6726	6db8800965c51df47e711e72bf22185f_6483	0ed7320c6f511ce95f40560feeb5531a_10892	K_pneumoniae_6_03070
WP_002923153.1		aromatic acid/H+ symport family MFS transporter	6	6	1	1	4890				1370	1370	1370	a177eae4552a0a1383f611870b669525_116	40b06fe84ca1b8758d0c3f8a0dea34af_10017	20e8a30293b7b0c63abbc29d0c4c19ee_7385	6db8800965c51df47e711e72bf22185f_7712	0ed7320c6f511ce95f40560feeb5531a_7509	K_pneumoniae_6_03587
fbaB		class I fructose-bisphosphate aldolase	6	6	1	1	450				1052	1052	1052	a177eae4552a0a1383f611870b669525_3293	40b06fe84ca1b8758d0c3f8a0dea34af_2769	20e8a30293b7b0c63abbc29d0c4c19ee_582	6db8800965c51df47e711e72bf22185f_1577	0ed7320c6f511ce95f40560feeb5531a_2056	K_pneumoniae_6_01062
WP_004141456.1		helix-turn-helix transcriptional regulator	6	6	1	1	4293				449	449	449	a177eae4552a0a1383f611870b669525_6795	40b06fe84ca1b8758d0c3f8a0dea34af_6263	20e8a30293b7b0c63abbc29d0c4c19ee_5321	6db8800965c51df47e711e72bf22185f_5345	0ed7320c6f511ce95f40560feeb5531a_5824	K_pneumoniae_6_00192
rfbD		UDP-galactopyranose mutase	6	6	1	1	3677				1154	1154	1154	a177eae4552a0a1383f611870b669525_3425	40b06fe84ca1b8758d0c3f8a0dea34af_2889	20e8a30293b7b0c63abbc29d0c4c19ee_448	6db8800965c51df47e711e72bf22185f_5596	0ed7320c6f511ce95f40560feeb5531a_1922	K_pneumoniae_6_00999
WP_004181642.1		amidohydrolase family protein	6	6	1	1	2990				998	998	998	a177eae4552a0a1383f611870b669525_10098	40b06fe84ca1b8758d0c3f8a0dea34af_9570	20e8a30293b7b0c63abbc29d0c4c19ee_9034	6db8800965c51df47e711e72bf22185f_9002	0ed7320c6f511ce95f40560feeb5531a_9565	K_pneumoniae_6_04510
paaG		2-(1,2-epoxy-1,2-dihydrophenyl)acetyl-CoA isomerase PaaG	6	6	1	1	4076				788	788	788	a177eae4552a0a1383f611870b669525_5980	40b06fe84ca1b8758d0c3f8a0dea34af_4147	20e8a30293b7b0c63abbc29d0c4c19ee_6966	6db8800965c51df47e711e72bf22185f_6934	0ed7320c6f511ce95f40560feeb5531a_7070	K_pneumoniae_6_04063
WP_002913764.1		ArsC family reductase	6	6	1	1	700				353	353	353	a177eae4552a0a1383f611870b669525_2767	40b06fe84ca1b8758d0c3f8a0dea34af_2241	20e8a30293b7b0c63abbc29d0c4c19ee_1108	6db8800965c51df47e711e72bf22185f_2103	0ed7320c6f511ce95f40560feeb5531a_2582	K_pneumoniae_6_01315
WP_004176215.1		isopenicillin N synthase family oxygenase	6	6	1	1	2686				1028	1028	1028	a177eae4552a0a1383f611870b669525_5580	40b06fe84ca1b8758d0c3f8a0dea34af_4549	20e8a30293b7b0c63abbc29d0c4c19ee_10165	6db8800965c51df47e711e72bf22185f_10238	0ed7320c6f511ce95f40560feeb5531a_8657	K_pneumoniae_6_03841
eutK		ethanolamine utilization microcompartment protein EutK	6	6	1	1	677				485	485	485	a177eae4552a0a1383f611870b669525_2815	40b06fe84ca1b8758d0c3f8a0dea34af_2289	20e8a30293b7b0c63abbc29d0c4c19ee_1060	6db8800965c51df47e711e72bf22185f_2055	0ed7320c6f511ce95f40560feeb5531a_2534	K_pneumoniae_6_01292
WP_004179063.1		biotin-dependent carboxyltransferase family protein	6	6	1	1	1052				932	932	932	a177eae4552a0a1383f611870b669525_7436	40b06fe84ca1b8758d0c3f8a0dea34af_6906	20e8a30293b7b0c63abbc29d0c4c19ee_1945	6db8800965c51df47e711e72bf22185f_1053	0ed7320c6f511ce95f40560feeb5531a_1053	K_pneumoniae_6_00508
pepP		Xaa-Pro aminopeptidase	6	6	1	1	4616				1316	1316	1316	a177eae4552a0a1383f611870b669525_1586	40b06fe84ca1b8758d0c3f8a0dea34af_970	20e8a30293b7b0c63abbc29d0c4c19ee_9404	6db8800965c51df47e711e72bf22185f_9489	0ed7320c6f511ce95f40560feeb5531a_9787	K_pneumoniae_6_04680
secA		preprotein translocase subunit SecA	6	6	1	1	1673				2705	2705	2705	a177eae4552a0a1383f611870b669525_8740	40b06fe84ca1b8758d0c3f8a0dea34af_8210	20e8a30293b7b0c63abbc29d0c4c19ee_4705	6db8800965c51df47e711e72bf22185f_4264	0ed7320c6f511ce95f40560feeb5531a_4743	K_pneumoniae_6_02718
cysZ		sulfate transporter CysZ	6	6	1	1	656				761	761	761	a177eae4552a0a1383f611870b669525_2859	40b06fe84ca1b8758d0c3f8a0dea34af_2333	20e8a30293b7b0c63abbc29d0c4c19ee_1016	6db8800965c51df47e711e72bf22185f_2011	0ed7320c6f511ce95f40560feeb5531a_2490	K_pneumoniae_6_01271
WP_004181382.1		glycerone kinase	6	6	1	1	4957				1649	1649	1649	a177eae4552a0a1383f611870b669525_1272	40b06fe84ca1b8758d0c3f8a0dea34af_651	20e8a30293b7b0c63abbc29d0c4c19ee_6048	6db8800965c51df47e711e72bf22185f_6108	0ed7320c6f511ce95f40560feeb5531a_6511	K_pneumoniae_6_03567
WP_039819516.1		glycosyltransferase	6	6	1	1	3678				893	893	893	a177eae4552a0a1383f611870b669525_3427	40b06fe84ca1b8758d0c3f8a0dea34af_2891	20e8a30293b7b0c63abbc29d0c4c19ee_446	6db8800965c51df47e711e72bf22185f_5598	0ed7320c6f511ce95f40560feeb5531a_1920	K_pneumoniae_6_00998
budA		acetolactate decarboxylase	6	6	1	1	3997				779	779	779	a177eae4552a0a1383f611870b669525_4675	40b06fe84ca1b8758d0c3f8a0dea34af_5457	20e8a30293b7b0c63abbc29d0c4c19ee_10395	6db8800965c51df47e711e72bf22185f_10480	0ed7320c6f511ce95f40560feeb5531a_10510	K_pneumoniae_6_05004
aroH		3-deoxy-7-phosphoheptulonate synthase AroH	6	6	1	1	316				1046	1046	1046	a177eae4552a0a1383f611870b669525_4448	40b06fe84ca1b8758d0c3f8a0dea34af_3840	20e8a30293b7b0c63abbc29d0c4c19ee_7845	6db8800965c51df47e711e72bf22185f_7831	0ed7320c6f511ce95f40560feeb5531a_6228	K_pneumoniae_6_03957
sstT		serine/threonine transporter SstT	6	6	1	1	4976				1247	1247	1247	a177eae4552a0a1383f611870b669525_1234	40b06fe84ca1b8758d0c3f8a0dea34af_613	20e8a30293b7b0c63abbc29d0c4c19ee_6086	6db8800965c51df47e711e72bf22185f_6146	0ed7320c6f511ce95f40560feeb5531a_6549	K_pneumoniae_6_03548
tolA		cell envelope integrity protein TolA	6	6	1	1	1030				1325	1325	1325	a177eae4552a0a1383f611870b669525_7392	40b06fe84ca1b8758d0c3f8a0dea34af_6862	20e8a30293b7b0c63abbc29d0c4c19ee_1989	6db8800965c51df47e711e72bf22185f_1097	0ed7320c6f511ce95f40560feeb5531a_1097	K_pneumoniae_6_00486
ppk1		polyphosphate kinase 1	6	6	1	1	723				2060	2060	2060	a177eae4552a0a1383f611870b669525_2721	40b06fe84ca1b8758d0c3f8a0dea34af_2195	20e8a30293b7b0c63abbc29d0c4c19ee_1154	6db8800965c51df47e711e72bf22185f_2149	0ed7320c6f511ce95f40560feeb5531a_2628	K_pneumoniae_6_01337
WP_004179850.1		cytochrome ubiquinol oxidase subunit I	6	6	1	1	37				1418	1418	1418	a177eae4552a0a1383f611870b669525_5470	40b06fe84ca1b8758d0c3f8a0dea34af_4659	20e8a30293b7b0c63abbc29d0c4c19ee_3064	6db8800965c51df47e711e72bf22185f_3064	0ed7320c6f511ce95f40560feeb5531a_2862	K_pneumoniae_6_01829
WP_004149602.1		cobalt-precorrin-4 methyltransferase	6	6	1	1	4460				773	773	773	a177eae4552a0a1383f611870b669525_1899	40b06fe84ca1b8758d0c3f8a0dea34af_1283	20e8a30293b7b0c63abbc29d0c4c19ee_3660	6db8800965c51df47e711e72bf22185f_3295	0ed7320c6f511ce95f40560feeb5531a_3774	K_pneumoniae_6_02252
WP_002889727.1		GNAT family N-acetyltransferase	6	6	1	1	1531				452	452	452	a177eae4552a0a1383f611870b669525_8431	40b06fe84ca1b8758d0c3f8a0dea34af_7901	20e8a30293b7b0c63abbc29d0c4c19ee_5595	6db8800965c51df47e711e72bf22185f_58	0ed7320c6f511ce95f40560feeb5531a_58	K_pneumoniae_6_03030
lhgO		L-2-hydroxyglutarate oxidase	6	6	1	1	1522				1268	1268	1268	a177eae4552a0a1383f611870b669525_8413	40b06fe84ca1b8758d0c3f8a0dea34af_7883	20e8a30293b7b0c63abbc29d0c4c19ee_5613	6db8800965c51df47e711e72bf22185f_76	0ed7320c6f511ce95f40560feeb5531a_76	K_pneumoniae_6_03021
WP_004174507.1		type 1 fimbrial protein	6	6	1	1	4557				536	536	536	a177eae4552a0a1383f611870b669525_1704	40b06fe84ca1b8758d0c3f8a0dea34af_1088	20e8a30293b7b0c63abbc29d0c4c19ee_9522	6db8800965c51df47e711e72bf22185f_9607	0ed7320c6f511ce95f40560feeb5531a_9905	K_pneumoniae_6_04738
WP_039819528.1		lipoate--protein ligase A	6	6	1	1	3713				740	740	740	a177eae4552a0a1383f611870b669525_3484	40b06fe84ca1b8758d0c3f8a0dea34af_2950	20e8a30293b7b0c63abbc29d0c4c19ee_389	6db8800965c51df47e711e72bf22185f_5655	0ed7320c6f511ce95f40560feeb5531a_1863	K_pneumoniae_6_00971
WP_004180168.1		aldo/keto reductase family oxidoreductase	6	6	1	1	5796				896	896	896	a177eae4552a0a1383f611870b669525_4863	40b06fe84ca1b8758d0c3f8a0dea34af_5268	20e8a30293b7b0c63abbc29d0c4c19ee_2456	6db8800965c51df47e711e72bf22185f_2456	0ed7320c6f511ce95f40560feeb5531a_3470	K_pneumoniae_6_02115
WP_002916001.1		sugar porter family MFS transporter	6	6	1	1	4532				1421	1421	1421	a177eae4552a0a1383f611870b669525_1752	40b06fe84ca1b8758d0c3f8a0dea34af_1136	20e8a30293b7b0c63abbc29d0c4c19ee_3807	6db8800965c51df47e711e72bf22185f_3148	0ed7320c6f511ce95f40560feeb5531a_3627	K_pneumoniae_6_02182
WP_002915973.1		TerC family protein	6	6	1	1	4508				713	713	713	a177eae4552a0a1383f611870b669525_1802	40b06fe84ca1b8758d0c3f8a0dea34af_1186	20e8a30293b7b0c63abbc29d0c4c19ee_3757	6db8800965c51df47e711e72bf22185f_3198	0ed7320c6f511ce95f40560feeb5531a_3677	K_pneumoniae_6_02205
dsdA		D-serine ammonia-lyase	6	6	1	1	4794				1328	1328	1328	a177eae4552a0a1383f611870b669525_52	40b06fe84ca1b8758d0c3f8a0dea34af_10081	20e8a30293b7b0c63abbc29d0c4c19ee_9741	6db8800965c51df47e711e72bf22185f_9826	0ed7320c6f511ce95f40560feeb5531a_10165	K_pneumoniae_6_01470
murQ		N-acetylmuramic acid 6-phosphate etherase	6	6	1	1	4880				902	902	902	a177eae4552a0a1383f611870b669525_136	40b06fe84ca1b8758d0c3f8a0dea34af_9997	20e8a30293b7b0c63abbc29d0c4c19ee_7405	6db8800965c51df47e711e72bf22185f_7692	0ed7320c6f511ce95f40560feeb5531a_7529	K_pneumoniae_6_03598
WP_002923305.1		DUF202 domain-containing protein	6	6	1	1	4791				347	347	347	a177eae4552a0a1383f611870b669525_46	40b06fe84ca1b8758d0c3f8a0dea34af_10087	20e8a30293b7b0c63abbc29d0c4c19ee_9747	6db8800965c51df47e711e72bf22185f_9832	0ed7320c6f511ce95f40560feeb5531a_10159	K_pneumoniae_6_01467
cirA		catecholate siderophore receptor CirA	6	6	1	1	494				1973	1973	1973	a177eae4552a0a1383f611870b669525_3206	40b06fe84ca1b8758d0c3f8a0dea34af_2680	20e8a30293b7b0c63abbc29d0c4c19ee_669	6db8800965c51df47e711e72bf22185f_1664	0ed7320c6f511ce95f40560feeb5531a_2143	K_pneumoniae_6_01105
cbiD		cobalt-precorrin-5B (C(1))-methyltransferase CbiD	6	6	1	1	4463				1139	1139	1139	a177eae4552a0a1383f611870b669525_1893	40b06fe84ca1b8758d0c3f8a0dea34af_1277	20e8a30293b7b0c63abbc29d0c4c19ee_3666	6db8800965c51df47e711e72bf22185f_3289	0ed7320c6f511ce95f40560feeb5531a_3768	K_pneumoniae_6_02249
WP_001029679.1		TnsA endonuclease N-terminal domain-containing protein	6	6	1	1	2934				821	821	821	a177eae4552a0a1383f611870b669525_10390	40b06fe84ca1b8758d0c3f8a0dea34af_9862	20e8a30293b7b0c63abbc29d0c4c19ee_10549	6db8800965c51df47e711e72bf22185f_10634	0ed7320c6f511ce95f40560feeb5531a_10618	K_pneumoniae_6_05059
WP_002921789.1		ABC transporter substrate-binding protein	6	6	1	1	3931				1607	1607	1607	a177eae4552a0a1383f611870b669525_434	40b06fe84ca1b8758d0c3f8a0dea34af_10353	20e8a30293b7b0c63abbc29d0c4c19ee_8804	6db8800965c51df47e711e72bf22185f_8875	0ed7320c6f511ce95f40560feeb5531a_9386	K_pneumoniae_6_04548
WP_004148983.1		molybdopterin-dependent oxidoreductase	6	6	1	1	3711				380	461	447	a177eae4552a0a1383f611870b669525_3488	40b06fe84ca1b8758d0c3f8a0dea34af_2954	20e8a30293b7b0c63abbc29d0c4c19ee_385	6db8800965c51df47e711e72bf22185f_5659	0ed7320c6f511ce95f40560feeb5531a_1859	K_pneumoniae_6_00969
WP_004181013.1		PTS glucitol/sorbitol transporter subunit IIB	6	6	1	1	1973				980	980	980	a177eae4552a0a1383f611870b669525_2224	40b06fe84ca1b8758d0c3f8a0dea34af_1608	20e8a30293b7b0c63abbc29d0c4c19ee_3335	6db8800965c51df47e711e72bf22185f_3620	0ed7320c6f511ce95f40560feeb5531a_4099	K_pneumoniae_6_02408
skp		molecular chaperone Skp	6	6	1	1	1581				485	485	485	a177eae4552a0a1383f611870b669525_8552	40b06fe84ca1b8758d0c3f8a0dea34af_8022	20e8a30293b7b0c63abbc29d0c4c19ee_4517	6db8800965c51df47e711e72bf22185f_4452	0ed7320c6f511ce95f40560feeb5531a_4931	K_pneumoniae_6_02807
WP_002907802.1		hypothetical protein	6	6	1	1	5822				149	149	149	a177eae4552a0a1383f611870b669525_4802	40b06fe84ca1b8758d0c3f8a0dea34af_5331	20e8a30293b7b0c63abbc29d0c4c19ee_2395	6db8800965c51df47e711e72bf22185f_2395	0ed7320c6f511ce95f40560feeb5531a_3531	K_pneumoniae_6_02143
WP_004180966.1		SDR family NAD(P)-dependent oxidoreductase	6	6	1	1	2029				794	794	794	a177eae4552a0a1383f611870b669525_2349	40b06fe84ca1b8758d0c3f8a0dea34af_1733	20e8a30293b7b0c63abbc29d0c4c19ee_3208	6db8800965c51df47e711e72bf22185f_3745	0ed7320c6f511ce95f40560feeb5531a_4224	K_pneumoniae_6_02469
treB		PTS trehalose transporter subunit IIBC	6	6	1	1	5908				1418	1418	1418	a177eae4552a0a1383f611870b669525_9340	40b06fe84ca1b8758d0c3f8a0dea34af_8810	20e8a30293b7b0c63abbc29d0c4c19ee_4352	6db8800965c51df47e711e72bf22185f_4617	0ed7320c6f511ce95f40560feeb5531a_5492	K_pneumoniae_6_01557
acrD		multidrug efflux RND transporter permease AcrD	6	6	1	1	699				3113	3113	3113	a177eae4552a0a1383f611870b669525_2771	40b06fe84ca1b8758d0c3f8a0dea34af_2245	20e8a30293b7b0c63abbc29d0c4c19ee_1104	6db8800965c51df47e711e72bf22185f_2099	0ed7320c6f511ce95f40560feeb5531a_2578	K_pneumoniae_6_01314
pqqE		pyrroloquinoline quinone biosynthesis protein PqqE	6	6	1	1	5611				1142	1142	1142	a177eae4552a0a1383f611870b669525_5233	40b06fe84ca1b8758d0c3f8a0dea34af_4898	20e8a30293b7b0c63abbc29d0c4c19ee_2827	6db8800965c51df47e711e72bf22185f_2827	0ed7320c6f511ce95f40560feeb5531a_3099	K_pneumoniae_6_01938
parE		DNA topoisomerase IV subunit B	6	6	1	1	3842				1895	1895	1895	a177eae4552a0a1383f611870b669525_1396	40b06fe84ca1b8758d0c3f8a0dea34af_775	20e8a30293b7b0c63abbc29d0c4c19ee_10678	6db8800965c51df47e711e72bf22185f_10806	0ed7320c6f511ce95f40560feeb5531a_10715	K_pneumoniae_6_05108
dtpD		dipeptide permease DtpD	6	6	1	1	1277				1475	1475	1475	a177eae4552a0a1383f611870b669525_7911	40b06fe84ca1b8758d0c3f8a0dea34af_7381	20e8a30293b7b0c63abbc29d0c4c19ee_1470	6db8800965c51df47e711e72bf22185f_578	0ed7320c6f511ce95f40560feeb5531a_578	K_pneumoniae_6_00739
WP_002914934.1		HypC/HybG/HupF family hydrogenase formation chaperone	6	6	1	1	1946				272	272	272	a177eae4552a0a1383f611870b669525_2170	40b06fe84ca1b8758d0c3f8a0dea34af_1554	20e8a30293b7b0c63abbc29d0c4c19ee_3389	6db8800965c51df47e711e72bf22185f_3566	0ed7320c6f511ce95f40560feeb5531a_4045	K_pneumoniae_6_02381
WP_004198819.1		EAL domain-containing protein	6	6	1	1	3710				1787	1910	1889	a177eae4552a0a1383f611870b669525_3490	40b06fe84ca1b8758d0c3f8a0dea34af_2956	20e8a30293b7b0c63abbc29d0c4c19ee_383	6db8800965c51df47e711e72bf22185f_5661	0ed7320c6f511ce95f40560feeb5531a_1857	K_pneumoniae_6_00968
WP_043906752.1		tape measure protein	6	6	1	1	2507				3263	3263	3263	a177eae4552a0a1383f611870b669525_3947	40b06fe84ca1b8758d0c3f8a0dea34af_3338	20e8a30293b7b0c63abbc29d0c4c19ee_13	6db8800965c51df47e711e72bf22185f_6031	0ed7320c6f511ce95f40560feeb5531a_1487	K_pneumoniae_6_00793
nikC		nickel ABC transporter permease subunit NikC	6	6	1	1	3431				833	833	833	a177eae4552a0a1383f611870b669525_568	40b06fe84ca1b8758d0c3f8a0dea34af_10487	20e8a30293b7b0c63abbc29d0c4c19ee_7340	6db8800965c51df47e711e72bf22185f_7183	0ed7320c6f511ce95f40560feeb5531a_10435	K_pneumoniae_6_04967
rng		ribonuclease G	6	6	1	1	5103				1469	1469	1469	a177eae4552a0a1383f611870b669525_973	40b06fe84ca1b8758d0c3f8a0dea34af_352	20e8a30293b7b0c63abbc29d0c4c19ee_6347	6db8800965c51df47e711e72bf22185f_6407	0ed7320c6f511ce95f40560feeb5531a_6810	K_pneumoniae_6_03420
WP_004179654.1		YdcF family protein	6	6	1	1	4102				800	800	800	a177eae4552a0a1383f611870b669525_5928	40b06fe84ca1b8758d0c3f8a0dea34af_4201	20e8a30293b7b0c63abbc29d0c4c19ee_6914	6db8800965c51df47e711e72bf22185f_6986	0ed7320c6f511ce95f40560feeb5531a_7018	K_pneumoniae_6_04088
lolD		lipoprotein-releasing ABC transporter ATP-binding protein LolD	6	6	1	1	4383				701	701	701	a177eae4552a0a1383f611870b669525_6605	40b06fe84ca1b8758d0c3f8a0dea34af_6076	20e8a30293b7b0c63abbc29d0c4c19ee_5134	6db8800965c51df47e711e72bf22185f_5158	0ed7320c6f511ce95f40560feeb5531a_5637	K_pneumoniae_6_00105
yddG		aromatic amino acid DMT transporter YddG	6	6	1	1	5673				878	878	878	a177eae4552a0a1383f611870b669525_5109	40b06fe84ca1b8758d0c3f8a0dea34af_5022	20e8a30293b7b0c63abbc29d0c4c19ee_2702	6db8800965c51df47e711e72bf22185f_2702	0ed7320c6f511ce95f40560feeb5531a_3224	K_pneumoniae_6_01996
rplQ		50S ribosomal protein L17	6	6	1	1	5139				386	386	386	a177eae4552a0a1383f611870b669525_886	40b06fe84ca1b8758d0c3f8a0dea34af_265	20e8a30293b7b0c63abbc29d0c4c19ee_10795	6db8800965c51df47e711e72bf22185f_10880	0ed7320c6f511ce95f40560feeb5531a_10832	K_pneumoniae_6_05163
WP_004180040.1		MFS transporter	6	6	1	1	5619				1406	1406	1406	a177eae4552a0a1383f611870b669525_5217	40b06fe84ca1b8758d0c3f8a0dea34af_4914	20e8a30293b7b0c63abbc29d0c4c19ee_2810	6db8800965c51df47e711e72bf22185f_2810	0ed7320c6f511ce95f40560feeb5531a_3116	K_pneumoniae_6_01946
ruvA		Holliday junction branch migration protein RuvA	6	6	1	1	5384				611	611	611	a177eae4552a0a1383f611870b669525_3983	40b06fe84ca1b8758d0c3f8a0dea34af_3374	20e8a30293b7b0c63abbc29d0c4c19ee_10509	6db8800965c51df47e711e72bf22185f_10536	0ed7320c6f511ce95f40560feeb5531a_8020	K_pneumoniae_6_03389
WP_004179245.1		iron ABC transporter substrate-binding protein	6	6	1	1	4265				1016	1016	1016	a177eae4552a0a1383f611870b669525_6849	40b06fe84ca1b8758d0c3f8a0dea34af_6317	20e8a30293b7b0c63abbc29d0c4c19ee_5375	6db8800965c51df47e711e72bf22185f_5399	0ed7320c6f511ce95f40560feeb5531a_5878	K_pneumoniae_6_00220
WP_004184768.1		LysR substrate-binding domain-containing protein	6	6	1	1	3706				914	914	914	a177eae4552a0a1383f611870b669525_3498	40b06fe84ca1b8758d0c3f8a0dea34af_2964	20e8a30293b7b0c63abbc29d0c4c19ee_375	6db8800965c51df47e711e72bf22185f_5669	0ed7320c6f511ce95f40560feeb5531a_1849	K_pneumoniae_6_00965
WP_004173862.1		DNA-binding transcriptional regulator	6	6	1	1	4811				323	323	323	a177eae4552a0a1383f611870b669525_86	40b06fe84ca1b8758d0c3f8a0dea34af_10047	20e8a30293b7b0c63abbc29d0c4c19ee_9707	6db8800965c51df47e711e72bf22185f_9792	0ed7320c6f511ce95f40560feeb5531a_10199	K_pneumoniae_6_01485
mukB		chromosome partition protein MukB	6	6	1	1	4209				4448	4448	4448	a177eae4552a0a1383f611870b669525_6966	40b06fe84ca1b8758d0c3f8a0dea34af_6436	20e8a30293b7b0c63abbc29d0c4c19ee_5492	6db8800965c51df47e711e72bf22185f_5516	0ed7320c6f511ce95f40560feeb5531a_5995	K_pneumoniae_6_00278
sdaA		L-serine ammonia-lyase	6	6	1	1	243				1364	1364	1364	a177eae4552a0a1383f611870b669525_4083	40b06fe84ca1b8758d0c3f8a0dea34af_3478	20e8a30293b7b0c63abbc29d0c4c19ee_9095	6db8800965c51df47e711e72bf22185f_9434	0ed7320c6f511ce95f40560feeb5531a_7920	K_pneumoniae_6_03343
dnaE		DNA polymerase III subunit alpha	6	6	1	1	1575				3482	3482	3482	a177eae4552a0a1383f611870b669525_8540	40b06fe84ca1b8758d0c3f8a0dea34af_8010	20e8a30293b7b0c63abbc29d0c4c19ee_4505	6db8800965c51df47e711e72bf22185f_4464	0ed7320c6f511ce95f40560feeb5531a_4943	K_pneumoniae_6_02813
WP_043906961.1		OmpK36 porin	6	6	1	1	536				1103	1103	1103	a177eae4552a0a1383f611870b669525_3119	40b06fe84ca1b8758d0c3f8a0dea34af_2593	20e8a30293b7b0c63abbc29d0c4c19ee_756	6db8800965c51df47e711e72bf22185f_1751	0ed7320c6f511ce95f40560feeb5531a_2230	K_pneumoniae_6_01148
group_1385	tssE	type VI secretion system baseplate subunit TssE	6	6	1	1	4446				425	425	425	a177eae4552a0a1383f611870b669525_1927	40b06fe84ca1b8758d0c3f8a0dea34af_1311	20e8a30293b7b0c63abbc29d0c4c19ee_3632	6db8800965c51df47e711e72bf22185f_3323	0ed7320c6f511ce95f40560feeb5531a_3802	K_pneumoniae_6_02265
fdhF		formate dehydrogenase subunit alpha	6	6	1	1	393				2150	2150	2150	a177eae4552a0a1383f611870b669525_4607	40b06fe84ca1b8758d0c3f8a0dea34af_3999	20e8a30293b7b0c63abbc29d0c4c19ee_7686	6db8800965c51df47e711e72bf22185f_7990	0ed7320c6f511ce95f40560feeb5531a_6069	K_pneumoniae_6_03882
WP_004173981.1		MFS transporter	6	6	1	1	3444				1220	1220	1220	a177eae4552a0a1383f611870b669525_594	40b06fe84ca1b8758d0c3f8a0dea34af_10513	20e8a30293b7b0c63abbc29d0c4c19ee_7314	6db8800965c51df47e711e72bf22185f_7209	0ed7320c6f511ce95f40560feeb5531a_10409	K_pneumoniae_6_04954
ybiB		DNA-binding protein YbiB	6	6	1	1	951				968	968	968	a177eae4552a0a1383f611870b669525_7210	40b06fe84ca1b8758d0c3f8a0dea34af_6680	20e8a30293b7b0c63abbc29d0c4c19ee_2171	6db8800965c51df47e711e72bf22185f_1279	0ed7320c6f511ce95f40560feeb5531a_1279	K_pneumoniae_6_00401
WP_004180132.1		adenylate kinase	6	6	1	1	5709				551	551	551	a177eae4552a0a1383f611870b669525_5039	40b06fe84ca1b8758d0c3f8a0dea34af_5092	20e8a30293b7b0c63abbc29d0c4c19ee_2632	6db8800965c51df47e711e72bf22185f_2632	0ed7320c6f511ce95f40560feeb5531a_3294	K_pneumoniae_6_02032
WP_004179776.1		four-carbon acid sugar kinase family protein	6	6	1	1	2658				1235	1235	1235	a177eae4552a0a1383f611870b669525_5638	40b06fe84ca1b8758d0c3f8a0dea34af_4491	20e8a30293b7b0c63abbc29d0c4c19ee_10107	6db8800965c51df47e711e72bf22185f_10296	0ed7320c6f511ce95f40560feeb5531a_8599	K_pneumoniae_6_03813
WP_002904247.1		rhodanese	6	6	1	1	3744				398	398	398	a177eae4552a0a1383f611870b669525_5680	40b06fe84ca1b8758d0c3f8a0dea34af_4449	20e8a30293b7b0c63abbc29d0c4c19ee_10307	6db8800965c51df47e711e72bf22185f_10392	0ed7320c6f511ce95f40560feeb5531a_8557	K_pneumoniae_6_03791
WP_002906779.1		YgdI/YgdR family lipoprotein	6	6	1	1	5712				221	221	221	a177eae4552a0a1383f611870b669525_5033	40b06fe84ca1b8758d0c3f8a0dea34af_5098	20e8a30293b7b0c63abbc29d0c4c19ee_2626	6db8800965c51df47e711e72bf22185f_2626	0ed7320c6f511ce95f40560feeb5531a_3300	K_pneumoniae_6_02035
panM		aspartate 1-decarboxylase autocleavage activator PanM	6	6	1	1	3560				383	383	383	a177eae4552a0a1383f611870b669525_630	40b06fe84ca1b8758d0c3f8a0dea34af_9	20e8a30293b7b0c63abbc29d0c4c19ee_7280	6db8800965c51df47e711e72bf22185f_7243	0ed7320c6f511ce95f40560feeb5531a_8465	K_pneumoniae_6_04261
eutN		ethanolamine utilization microcompartment protein EutN	6	6	1	1	686				287	287	287	a177eae4552a0a1383f611870b669525_2797	40b06fe84ca1b8758d0c3f8a0dea34af_2271	20e8a30293b7b0c63abbc29d0c4c19ee_1078	6db8800965c51df47e711e72bf22185f_2073	0ed7320c6f511ce95f40560feeb5531a_2552	K_pneumoniae_6_01301
WP_004181475.1		4-aminobutyrate--2-oxoglutarate transaminase	6	6	1	1	3458				1265	1265	1265	a177eae4552a0a1383f611870b669525_622	40b06fe84ca1b8758d0c3f8a0dea34af_3	20e8a30293b7b0c63abbc29d0c4c19ee_7286	6db8800965c51df47e711e72bf22185f_7237	0ed7320c6f511ce95f40560feeb5531a_10381	K_pneumoniae_6_04940
glyS		glycine--tRNA ligase subunit beta	6	6	1	1	3813				2069	2069	2069	a177eae4552a0a1383f611870b669525_389	40b06fe84ca1b8758d0c3f8a0dea34af_10308	20e8a30293b7b0c63abbc29d0c4c19ee_7658	6db8800965c51df47e711e72bf22185f_7439	0ed7320c6f511ce95f40560feeb5531a_7782	K_pneumoniae_6_03718
group_1397	astB	N-succinylarginine dihydrolase	6	6	1	1	2197				1325	1325	1325	a177eae4552a0a1383f611870b669525_6377	40b06fe84ca1b8758d0c3f8a0dea34af_5768	20e8a30293b7b0c63abbc29d0c4c19ee_6479	6db8800965c51df47e711e72bf22185f_6730	0ed7320c6f511ce95f40560feeb5531a_7274	K_pneumoniae_6_03188
WP_004179708.1		mechanosensitive ion channel	6	6	1	1	4149				1616	1616	1616	a177eae4552a0a1383f611870b669525_5834	40b06fe84ca1b8758d0c3f8a0dea34af_4295	20e8a30293b7b0c63abbc29d0c4c19ee_6820	6db8800965c51df47e711e72bf22185f_7080	0ed7320c6f511ce95f40560feeb5531a_6924	K_pneumoniae_6_03719
WP_002888337.1		response regulator	6	6	1	1	1723				698	698	698	a177eae4552a0a1383f611870b669525_8841	40b06fe84ca1b8758d0c3f8a0dea34af_8311	20e8a30293b7b0c63abbc29d0c4c19ee_4806	6db8800965c51df47e711e72bf22185f_4163	0ed7320c6f511ce95f40560feeb5531a_4642	K_pneumoniae_6_02668
WP_023158634.1		molecular chaperone	6	7	1.17	1	3899				314	794	681	a177eae4552a0a1383f611870b669525_1476	40b06fe84ca1b8758d0c3f8a0dea34af_860 40b06fe84ca1b8758d0c3f8a0dea34af_855	20e8a30293b7b0c63abbc29d0c4c19ee_9621	6db8800965c51df47e711e72bf22185f_9689	0ed7320c6f511ce95f40560feeb5531a_9989	K_pneumoniae_6_04781
nuoJ		NADH-quinone oxidoreductase subunit J	6	6	1	1	569				554	554	554	a177eae4552a0a1383f611870b669525_3051	40b06fe84ca1b8758d0c3f8a0dea34af_2525	20e8a30293b7b0c63abbc29d0c4c19ee_824	6db8800965c51df47e711e72bf22185f_1819	0ed7320c6f511ce95f40560feeb5531a_2298	K_pneumoniae_6_01183
WP_023301322.1		GNAT family N-acetyltransferase	6	6	1	1	3399				533	533	533	a177eae4552a0a1383f611870b669525_496	40b06fe84ca1b8758d0c3f8a0dea34af_10415	20e8a30293b7b0c63abbc29d0c4c19ee_8866	6db8800965c51df47e711e72bf22185f_8937	0ed7320c6f511ce95f40560feeb5531a_9324	K_pneumoniae_6_04580
WP_002904643.1		VF530 family protein	6	6	1	1	2687				263	263	263	a177eae4552a0a1383f611870b669525_5578	40b06fe84ca1b8758d0c3f8a0dea34af_4551	20e8a30293b7b0c63abbc29d0c4c19ee_10167	6db8800965c51df47e711e72bf22185f_10236	0ed7320c6f511ce95f40560feeb5531a_8659	K_pneumoniae_6_03842
WP_004180646.1		fructuronate reductase	6	6	1	1	506				1466	1466	1466	a177eae4552a0a1383f611870b669525_3182	40b06fe84ca1b8758d0c3f8a0dea34af_2656	20e8a30293b7b0c63abbc29d0c4c19ee_693	6db8800965c51df47e711e72bf22185f_1688	0ed7320c6f511ce95f40560feeb5531a_2167	K_pneumoniae_6_01117
WP_004179583.1		NADP-dependent oxidoreductase	6	6	1	1	4037				1034	1034	1034	a177eae4552a0a1383f611870b669525_6058	40b06fe84ca1b8758d0c3f8a0dea34af_4069	20e8a30293b7b0c63abbc29d0c4c19ee_7044	6db8800965c51df47e711e72bf22185f_6856	0ed7320c6f511ce95f40560feeb5531a_7148	K_pneumoniae_6_04024
flk		flagella biosynthesis regulator Flk	6	6	1	1	611				977	977	977	a177eae4552a0a1383f611870b669525_2967	40b06fe84ca1b8758d0c3f8a0dea34af_2441	20e8a30293b7b0c63abbc29d0c4c19ee_908	6db8800965c51df47e711e72bf22185f_1903	0ed7320c6f511ce95f40560feeb5531a_2382	K_pneumoniae_6_01223
rcsA		transcriptional regulator RcsA	6	6	1	1	2343				623	623	623	a177eae4552a0a1383f611870b669525_3738	40b06fe84ca1b8758d0c3f8a0dea34af_3135	20e8a30293b7b0c63abbc29d0c4c19ee_216	6db8800965c51df47e711e72bf22185f_5828	0ed7320c6f511ce95f40560feeb5531a_1690	K_pneumoniae_6_00888
WP_002904407.1		sugar transporter	6	6	1	1	2652				1199	1199	1199	a177eae4552a0a1383f611870b669525_5650	40b06fe84ca1b8758d0c3f8a0dea34af_4479	20e8a30293b7b0c63abbc29d0c4c19ee_10337	6db8800965c51df47e711e72bf22185f_10422	0ed7320c6f511ce95f40560feeb5531a_8587	K_pneumoniae_6_03807
yieH		6-phosphogluconate phosphatase	6	6	1	1	4760				665	665	665	a177eae4552a0a1383f611870b669525_10436	40b06fe84ca1b8758d0c3f8a0dea34af_10154	20e8a30293b7b0c63abbc29d0c4c19ee_9814	6db8800965c51df47e711e72bf22185f_9899	0ed7320c6f511ce95f40560feeb5531a_10092	K_pneumoniae_6_01436
WP_004178754.1		SmdB family multidrug efflux ABC transporter permease/ATP-binding protein	6	6	1	1	1363				1778	1778	1778	a177eae4552a0a1383f611870b669525_8092	40b06fe84ca1b8758d0c3f8a0dea34af_7562	20e8a30293b7b0c63abbc29d0c4c19ee_5934	6db8800965c51df47e711e72bf22185f_397	0ed7320c6f511ce95f40560feeb5531a_397	K_pneumoniae_6_02864
oppC		oligopeptide ABC transporter permease OppC	6	6	1	1	280				908	908	908	a177eae4552a0a1383f611870b669525_4377	40b06fe84ca1b8758d0c3f8a0dea34af_3769	20e8a30293b7b0c63abbc29d0c4c19ee_7916	6db8800965c51df47e711e72bf22185f_7760	0ed7320c6f511ce95f40560feeb5531a_6299	K_pneumoniae_6_03991
WP_004179957.1		AtzE family amidohydrolase	6	6	1	1	5567				1397	1397	1397	a177eae4552a0a1383f611870b669525_5324	40b06fe84ca1b8758d0c3f8a0dea34af_4807	20e8a30293b7b0c63abbc29d0c4c19ee_2918	6db8800965c51df47e711e72bf22185f_2918	0ed7320c6f511ce95f40560feeb5531a_3008	K_pneumoniae_6_01897
queD		6-carboxytetrahydropterin synthase QueD	6	6	1	1	1890				365	365	365	a177eae4552a0a1383f611870b669525_2058	40b06fe84ca1b8758d0c3f8a0dea34af_1442	20e8a30293b7b0c63abbc29d0c4c19ee_3501	6db8800965c51df47e711e72bf22185f_3454	0ed7320c6f511ce95f40560feeb5531a_3933	K_pneumoniae_6_02326
WP_004196433.1		HutD family protein	6	6	1	1	3241				542	542	542	a177eae4552a0a1383f611870b669525_6234	40b06fe84ca1b8758d0c3f8a0dea34af_5625	20e8a30293b7b0c63abbc29d0c4c19ee_6622	6db8800965c51df47e711e72bf22185f_6587	0ed7320c6f511ce95f40560feeb5531a_7417	K_pneumoniae_6_03120
WP_002920153.1		phosphoribulokinase	6	6	1	1	5235				869	869	869	a177eae4552a0a1383f611870b669525_790	40b06fe84ca1b8758d0c3f8a0dea34af_169	20e8a30293b7b0c63abbc29d0c4c19ee_7120	6db8800965c51df47e711e72bf22185f_7403	0ed7320c6f511ce95f40560feeb5531a_8305	K_pneumoniae_6_04340
WP_004178444.1		DUF1365 domain-containing protein	6	6	1	1	836				722	722	722	a177eae4552a0a1383f611870b669525_9209	40b06fe84ca1b8758d0c3f8a0dea34af_8679	20e8a30293b7b0c63abbc29d0c4c19ee_10953	6db8800965c51df47e711e72bf22185f_10982	0ed7320c6f511ce95f40560feeb5531a_11002	K_pneumoniae_6_05217
WP_004145442.1		DUF1869 domain-containing protein	6	6	1	1	4669				329	329	329	a177eae4552a0a1383f611870b669525_4253	40b06fe84ca1b8758d0c3f8a0dea34af_3648	20e8a30293b7b0c63abbc29d0c4c19ee_10073	6db8800965c51df47e711e72bf22185f_10105	0ed7320c6f511ce95f40560feeb5531a_6420	K_pneumoniae_6_03265
WP_004180345.1		alpha/beta fold hydrolase	6	6	1	1	363				866	866	866	a177eae4552a0a1383f611870b669525_4547	40b06fe84ca1b8758d0c3f8a0dea34af_3939	20e8a30293b7b0c63abbc29d0c4c19ee_7746	6db8800965c51df47e711e72bf22185f_7930	0ed7320c6f511ce95f40560feeb5531a_6129	K_pneumoniae_6_03912
WP_004151539.1		GNAT family N-acetyltransferase	6	6	1	1	4766				419	419	419	a177eae4552a0a1383f611870b669525_10448	40b06fe84ca1b8758d0c3f8a0dea34af_10142	20e8a30293b7b0c63abbc29d0c4c19ee_9802	6db8800965c51df47e711e72bf22185f_9887	0ed7320c6f511ce95f40560feeb5531a_10104	K_pneumoniae_6_01442
tcyJ		cystine ABC transporter substrate-binding protein	6	6	1	1	2340				767	800	794	a177eae4552a0a1383f611870b669525_3744	40b06fe84ca1b8758d0c3f8a0dea34af_3141	20e8a30293b7b0c63abbc29d0c4c19ee_210	6db8800965c51df47e711e72bf22185f_5834	0ed7320c6f511ce95f40560feeb5531a_1684	K_pneumoniae_6_00885
WP_004180022.1		glutamine amidotransferase	6	6	1	1	5613				737	737	737	a177eae4552a0a1383f611870b669525_5229	40b06fe84ca1b8758d0c3f8a0dea34af_4902	20e8a30293b7b0c63abbc29d0c4c19ee_2823	6db8800965c51df47e711e72bf22185f_2823	0ed7320c6f511ce95f40560feeb5531a_3103	K_pneumoniae_6_01940
bssS		biofilm formation regulator BssS	6	6	1	1	4338				254	254	254	a177eae4552a0a1383f611870b669525_6695	40b06fe84ca1b8758d0c3f8a0dea34af_6166	20e8a30293b7b0c63abbc29d0c4c19ee_5224	6db8800965c51df47e711e72bf22185f_5248	0ed7320c6f511ce95f40560feeb5531a_5727	K_pneumoniae_6_00147
gudD		glucarate dehydratase	6	6	1	1	1880				1340	1340	1340	a177eae4552a0a1383f611870b669525_2038	40b06fe84ca1b8758d0c3f8a0dea34af_1422	20e8a30293b7b0c63abbc29d0c4c19ee_3521	6db8800965c51df47e711e72bf22185f_3434	0ed7320c6f511ce95f40560feeb5531a_3913	K_pneumoniae_6_02316
nudK		GDP-mannose pyrophosphatase NudK	6	6	1	1	697				596	596	596	a177eae4552a0a1383f611870b669525_2775	40b06fe84ca1b8758d0c3f8a0dea34af_2249	20e8a30293b7b0c63abbc29d0c4c19ee_1100	6db8800965c51df47e711e72bf22185f_2095	0ed7320c6f511ce95f40560feeb5531a_2574	K_pneumoniae_6_01312
WP_002901489.1		aspartate aminotransferase family protein	6	6	1	1	2200				1220	1220	1220	a177eae4552a0a1383f611870b669525_6383	40b06fe84ca1b8758d0c3f8a0dea34af_5774	20e8a30293b7b0c63abbc29d0c4c19ee_6473	6db8800965c51df47e711e72bf22185f_6736	0ed7320c6f511ce95f40560feeb5531a_7268	K_pneumoniae_6_03191
rof		Rho-binding antiterminator	6	6	1	1	1570				260	260	260	a177eae4552a0a1383f611870b669525_8530	40b06fe84ca1b8758d0c3f8a0dea34af_8000	20e8a30293b7b0c63abbc29d0c4c19ee_4495	6db8800965c51df47e711e72bf22185f_4474	0ed7320c6f511ce95f40560feeb5531a_4953	K_pneumoniae_6_02818
WP_002915261.1		aliphatic sulfonate ABC transporter substrate-binding protein	6	6	1	1	4408				941	941	941	a177eae4552a0a1383f611870b669525_2016	40b06fe84ca1b8758d0c3f8a0dea34af_1400	20e8a30293b7b0c63abbc29d0c4c19ee_3543	6db8800965c51df47e711e72bf22185f_3412	0ed7320c6f511ce95f40560feeb5531a_3891	K_pneumoniae_6_02305
WP_004178267.1		AzlC family ABC transporter permease	6	6	1	1	263				740	740	740	a177eae4552a0a1383f611870b669525_9816	40b06fe84ca1b8758d0c3f8a0dea34af_9288	20e8a30293b7b0c63abbc29d0c4c19ee_3876	6db8800965c51df47e711e72bf22185f_5093	0ed7320c6f511ce95f40560feeb5531a_5016	K_pneumoniae_6_01785
group_1428	ppiC	peptidylprolyl isomerase PpiC	6	6	1	1	2994				281	281	281	a177eae4552a0a1383f611870b669525_10106	40b06fe84ca1b8758d0c3f8a0dea34af_9578	20e8a30293b7b0c63abbc29d0c4c19ee_9042	6db8800965c51df47e711e72bf22185f_8994	0ed7320c6f511ce95f40560feeb5531a_9573	K_pneumoniae_6_04514
pflB		formate C-acetyltransferase	6	6	1	1	4189				2282	2282	2282	a177eae4552a0a1383f611870b669525_7006	40b06fe84ca1b8758d0c3f8a0dea34af_6476	20e8a30293b7b0c63abbc29d0c4c19ee_5532	6db8800965c51df47e711e72bf22185f_5556	0ed7320c6f511ce95f40560feeb5531a_6035	K_pneumoniae_6_00298
tyrP		tyrosine transporter TyrP	6	6	1	1	2329				1142	1211	1199	a177eae4552a0a1383f611870b669525_3775	40b06fe84ca1b8758d0c3f8a0dea34af_3172	20e8a30293b7b0c63abbc29d0c4c19ee_179	6db8800965c51df47e711e72bf22185f_5865	0ed7320c6f511ce95f40560feeb5531a_1653	K_pneumoniae_6_00871
WP_004144329.1		3-phenylpropionate MFS transporter	6	6	1	1	788				1136	1136	1136	a177eae4552a0a1383f611870b669525_2591	40b06fe84ca1b8758d0c3f8a0dea34af_2065	20e8a30293b7b0c63abbc29d0c4c19ee_1284	6db8800965c51df47e711e72bf22185f_2279	0ed7320c6f511ce95f40560feeb5531a_2758	K_pneumoniae_6_01401
WP_004176321.1		M20 family metallopeptidase	6	6	1	1	4138				1445	1445	1445	a177eae4552a0a1383f611870b669525_5856	40b06fe84ca1b8758d0c3f8a0dea34af_4273	20e8a30293b7b0c63abbc29d0c4c19ee_6842	6db8800965c51df47e711e72bf22185f_7058	0ed7320c6f511ce95f40560feeb5531a_6946	K_pneumoniae_6_04123
tssJ		type VI secretion system lipoprotein TssJ	6	6	1	1	4024				542	542	542	a177eae4552a0a1383f611870b669525_6084	40b06fe84ca1b8758d0c3f8a0dea34af_4043	20e8a30293b7b0c63abbc29d0c4c19ee_7070	6db8800965c51df47e711e72bf22185f_6830	0ed7320c6f511ce95f40560feeb5531a_7174	K_pneumoniae_6_04011
ybtS		yersiniabactin biosynthesis salicylate synthase Irp9/YbtS	6	6	1	1	2836				1304	1304	1304	a177eae4552a0a1383f611870b669525_3638	40b06fe84ca1b8758d0c3f8a0dea34af_3068	20e8a30293b7b0c63abbc29d0c4c19ee_283	6db8800965c51df47e711e72bf22185f_5761	0ed7320c6f511ce95f40560feeb5531a_1757	K_pneumoniae_6_00920
WP_002887394.1		HlyD family secretion protein	6	6	1	1	1861				1067	1067	1067	a177eae4552a0a1383f611870b669525_9133	40b06fe84ca1b8758d0c3f8a0dea34af_8603	20e8a30293b7b0c63abbc29d0c4c19ee_5098	6db8800965c51df47e711e72bf22185f_3871	0ed7320c6f511ce95f40560feeb5531a_4350	K_pneumoniae_6_02530
group_1435	tssL	type VI secretion system protein TssL, short form	6	6	1	1	4436				665	665	665	a177eae4552a0a1383f611870b669525_1949	40b06fe84ca1b8758d0c3f8a0dea34af_1333	20e8a30293b7b0c63abbc29d0c4c19ee_3610	6db8800965c51df47e711e72bf22185f_3345	0ed7320c6f511ce95f40560feeb5531a_3824	K_pneumoniae_6_02275
atpA		F0F1 ATP synthase subunit alpha	6	6	1	1	2940				1541	1541	1541	a177eae4552a0a1383f611870b669525_10378	40b06fe84ca1b8758d0c3f8a0dea34af_9850	20e8a30293b7b0c63abbc29d0c4c19ee_10561	6db8800965c51df47e711e72bf22185f_10646	0ed7320c6f511ce95f40560feeb5531a_10606	K_pneumoniae_6_05053
WP_002884951.1		secondary thiamine-phosphate synthase enzyme YjbQ	6	6	1	1	158				416	416	416	a177eae4552a0a1383f611870b669525_9764	40b06fe84ca1b8758d0c3f8a0dea34af_9234	20e8a30293b7b0c63abbc29d0c4c19ee_3928	6db8800965c51df47e711e72bf22185f_5041	0ed7320c6f511ce95f40560feeb5531a_5068	K_pneumoniae_6_01760
zraS		two-component system sensor histidine kinase ZraS	6	6	1	1	4919				1394	1394	1394	a177eae4552a0a1383f611870b669525_9872	40b06fe84ca1b8758d0c3f8a0dea34af_9344	20e8a30293b7b0c63abbc29d0c4c19ee_10611	6db8800965c51df47e711e72bf22185f_10696	0ed7320c6f511ce95f40560feeb5531a_10648	K_pneumoniae_6_05097
WP_004181234.1		6-phospho-beta-glucosidase	6	6	1	1	4605				1433	1433	1433	a177eae4552a0a1383f611870b669525_1608	40b06fe84ca1b8758d0c3f8a0dea34af_992	20e8a30293b7b0c63abbc29d0c4c19ee_9426	6db8800965c51df47e711e72bf22185f_9511	0ed7320c6f511ce95f40560feeb5531a_9809	K_pneumoniae_6_04691
WP_002911522.1		MFS transporter	6	6	1	1	2322				1511	1562	1519	a177eae4552a0a1383f611870b669525_3789	40b06fe84ca1b8758d0c3f8a0dea34af_3186	20e8a30293b7b0c63abbc29d0c4c19ee_165	6db8800965c51df47e711e72bf22185f_5879	0ed7320c6f511ce95f40560feeb5531a_1639	K_pneumoniae_6_00865
WP_002892640.1		sucrose-specific PTS transporter subunit IIBC	6	6	1	1	1264				1370	1370	1370	a177eae4552a0a1383f611870b669525_7883	40b06fe84ca1b8758d0c3f8a0dea34af_7353	20e8a30293b7b0c63abbc29d0c4c19ee_1498	6db8800965c51df47e711e72bf22185f_606	0ed7320c6f511ce95f40560feeb5531a_606	K_pneumoniae_6_00725
rplV		50S ribosomal protein L22	6	6	1	1	5160				332	332	332	a177eae4552a0a1383f611870b669525_844	40b06fe84ca1b8758d0c3f8a0dea34af_223	20e8a30293b7b0c63abbc29d0c4c19ee_10753	6db8800965c51df47e711e72bf22185f_10838	0ed7320c6f511ce95f40560feeb5531a_10790	K_pneumoniae_6_05144
WP_002900781.1		glycine zipper 2TM domain-containing protein	6	6	1	1	4373				539	539	539	a177eae4552a0a1383f611870b669525_6625	40b06fe84ca1b8758d0c3f8a0dea34af_6096	20e8a30293b7b0c63abbc29d0c4c19ee_5154	6db8800965c51df47e711e72bf22185f_5178	0ed7320c6f511ce95f40560feeb5531a_5657	K_pneumoniae_6_00112
WP_004179132.1		YbjC family protein	6	6	1	1	898				287	287	287	a177eae4552a0a1383f611870b669525_7106	40b06fe84ca1b8758d0c3f8a0dea34af_6576	20e8a30293b7b0c63abbc29d0c4c19ee_2275	6db8800965c51df47e711e72bf22185f_1383	0ed7320c6f511ce95f40560feeb5531a_1383	K_pneumoniae_6_00349
WP_004180180.1		DeoR/GlpR family DNA-binding transcription regulator	6	6	1	1	5828				770	770	770	a177eae4552a0a1383f611870b669525_4790	40b06fe84ca1b8758d0c3f8a0dea34af_5343	20e8a30293b7b0c63abbc29d0c4c19ee_2383	6db8800965c51df47e711e72bf22185f_2383	0ed7320c6f511ce95f40560feeb5531a_3543	K_pneumoniae_6_02149
WP_004180175.1		AraC family transcriptional regulator	6	6	1	1	5818				926	926	926	a177eae4552a0a1383f611870b669525_4810	40b06fe84ca1b8758d0c3f8a0dea34af_5323	20e8a30293b7b0c63abbc29d0c4c19ee_2403	6db8800965c51df47e711e72bf22185f_2403	0ed7320c6f511ce95f40560feeb5531a_3523	K_pneumoniae_6_02139
WP_002898981.1		MysB family protein	6	6	1	1	4332				386	386	386	a177eae4552a0a1383f611870b669525_6707	40b06fe84ca1b8758d0c3f8a0dea34af_6178	20e8a30293b7b0c63abbc29d0c4c19ee_5236	6db8800965c51df47e711e72bf22185f_5260	0ed7320c6f511ce95f40560feeb5531a_5739	K_pneumoniae_6_00153
WP_002898987.1		rhodanese-related sulfurtransferase	6	6	1	1	4335				1064	1064	1064	a177eae4552a0a1383f611870b669525_6701	40b06fe84ca1b8758d0c3f8a0dea34af_6172	20e8a30293b7b0c63abbc29d0c4c19ee_5230	6db8800965c51df47e711e72bf22185f_5254	0ed7320c6f511ce95f40560feeb5531a_5733	K_pneumoniae_6_00150
bamD		outer membrane protein assembly factor BamD	6	6	1	1	2070				737	737	737	a177eae4552a0a1383f611870b669525_2435	40b06fe84ca1b8758d0c3f8a0dea34af_1819	20e8a30293b7b0c63abbc29d0c4c19ee_3122	6db8800965c51df47e711e72bf22185f_3831	0ed7320c6f511ce95f40560feeb5531a_4310	K_pneumoniae_6_02510
dcuB		anaerobic C4-dicarboxylate transporter DcuB	6	6	1	1	4937				1340	1340	1340	a177eae4552a0a1383f611870b669525_9909	40b06fe84ca1b8758d0c3f8a0dea34af_9381	20e8a30293b7b0c63abbc29d0c4c19ee_10648	6db8800965c51df47e711e72bf22185f_10733	0ed7320c6f511ce95f40560feeb5531a_10685	K_pneumoniae_6_05079
WP_019704100.1		hypothetical protein	6	6	1	1	2295				158	194	188	a177eae4552a0a1383f611870b669525_3849	40b06fe84ca1b8758d0c3f8a0dea34af_3246	20e8a30293b7b0c63abbc29d0c4c19ee_105	6db8800965c51df47e711e72bf22185f_5939	0ed7320c6f511ce95f40560feeb5531a_1579	K_pneumoniae_6_00836
WP_004180248.1		DUF535 family protein	6	6	1	1	3987				908	908	908	a177eae4552a0a1383f611870b669525_4695	40b06fe84ca1b8758d0c3f8a0dea34af_5437	20e8a30293b7b0c63abbc29d0c4c19ee_10375	6db8800965c51df47e711e72bf22185f_10460	0ed7320c6f511ce95f40560feeb5531a_10530	K_pneumoniae_6_05014
grpE		nucleotide exchange factor GrpE	6	6	1	1	2051				590	590	590	a177eae4552a0a1383f611870b669525_2396	40b06fe84ca1b8758d0c3f8a0dea34af_1780	20e8a30293b7b0c63abbc29d0c4c19ee_3161	6db8800965c51df47e711e72bf22185f_3792	0ed7320c6f511ce95f40560feeb5531a_4271	K_pneumoniae_6_02492
hemF		oxygen-dependent coproporphyrinogen oxidase	6	6	1	1	675				899	899	899	a177eae4552a0a1383f611870b669525_2819	40b06fe84ca1b8758d0c3f8a0dea34af_2293	20e8a30293b7b0c63abbc29d0c4c19ee_1056	6db8800965c51df47e711e72bf22185f_2051	0ed7320c6f511ce95f40560feeb5531a_2530	K_pneumoniae_6_01290
WP_004180790.1		nucleoside deaminase	6	6	1	1	632				458	458	458	a177eae4552a0a1383f611870b669525_2922	40b06fe84ca1b8758d0c3f8a0dea34af_2396	20e8a30293b7b0c63abbc29d0c4c19ee_953	6db8800965c51df47e711e72bf22185f_1948	0ed7320c6f511ce95f40560feeb5531a_2427	K_pneumoniae_6_01245
mutM		bifunctional DNA-formamidopyrimidine glycosylase/DNA-(apurinic or apyrimidinic site) lyase	6	6	1	1	223				809	809	809	a177eae4552a0a1383f611870b669525_277	40b06fe84ca1b8758d0c3f8a0dea34af_10196	20e8a30293b7b0c63abbc29d0c4c19ee_7546	6db8800965c51df47e711e72bf22185f_7551	0ed7320c6f511ce95f40560feeb5531a_7670	K_pneumoniae_6_03665
WP_004180124.1		amino acid ABC transporter permease	6	6	1	1	5703				926	926	926	a177eae4552a0a1383f611870b669525_5049	40b06fe84ca1b8758d0c3f8a0dea34af_5082	20e8a30293b7b0c63abbc29d0c4c19ee_2642	6db8800965c51df47e711e72bf22185f_2642	0ed7320c6f511ce95f40560feeb5531a_3284	K_pneumoniae_6_02026
livM		high-affinity branched-chain amino acid ABC transporter permease LivM	6	6	1	1	4722				1286	1286	1286	a177eae4552a0a1383f611870b669525_4177	40b06fe84ca1b8758d0c3f8a0dea34af_3572	20e8a30293b7b0c63abbc29d0c4c19ee_9189	6db8800965c51df47e711e72bf22185f_9340	0ed7320c6f511ce95f40560feeb5531a_7826	K_pneumoniae_6_03300
tdh		L-threonine 3-dehydrogenase	6	6	1	1	207				1025	1025	1025	a177eae4552a0a1383f611870b669525_309	40b06fe84ca1b8758d0c3f8a0dea34af_10228	20e8a30293b7b0c63abbc29d0c4c19ee_7578	6db8800965c51df47e711e72bf22185f_7519	0ed7320c6f511ce95f40560feeb5531a_7702	K_pneumoniae_6_03681
WP_004181552.1		zinc-binding alcohol dehydrogenase family protein	6	6	1	1	4857				1007	1007	1007	a177eae4552a0a1383f611870b669525_182	40b06fe84ca1b8758d0c3f8a0dea34af_9951	20e8a30293b7b0c63abbc29d0c4c19ee_7451	6db8800965c51df47e711e72bf22185f_7646	0ed7320c6f511ce95f40560feeb5531a_7575	K_pneumoniae_6_03619
ybeD		DUF493 family protein YbeD	6	6	1	1	1105				263	263	263	a177eae4552a0a1383f611870b669525_7565	40b06fe84ca1b8758d0c3f8a0dea34af_7035	20e8a30293b7b0c63abbc29d0c4c19ee_1816	6db8800965c51df47e711e72bf22185f_924	0ed7320c6f511ce95f40560feeb5531a_924	K_pneumoniae_6_00568
iscA		iron-sulfur cluster assembly protein IscA	6	6	1	1	778				323	323	323	a177eae4552a0a1383f611870b669525_2611	40b06fe84ca1b8758d0c3f8a0dea34af_2085	20e8a30293b7b0c63abbc29d0c4c19ee_1264	6db8800965c51df47e711e72bf22185f_2259	0ed7320c6f511ce95f40560feeb5531a_2738	K_pneumoniae_6_01391
uxuA		mannonate dehydratase	6	6	1	1	5067				1064	1064	1064	a177eae4552a0a1383f611870b669525_1045	40b06fe84ca1b8758d0c3f8a0dea34af_424	20e8a30293b7b0c63abbc29d0c4c19ee_6275	6db8800965c51df47e711e72bf22185f_6335	0ed7320c6f511ce95f40560feeb5531a_6738	K_pneumoniae_6_03455
WP_004143447.1		EAL domain-containing protein	6	6	1	1	2710				1655	1655	1655	a177eae4552a0a1383f611870b669525_5532	40b06fe84ca1b8758d0c3f8a0dea34af_4597	20e8a30293b7b0c63abbc29d0c4c19ee_10213	6db8800965c51df47e711e72bf22185f_10190	0ed7320c6f511ce95f40560feeb5531a_8705	K_pneumoniae_6_03865
gluQRS		tRNA glutamyl-Q(34) synthetase GluQRS	6	6	1	1	1630				881	881	881	a177eae4552a0a1383f611870b669525_8652	40b06fe84ca1b8758d0c3f8a0dea34af_8122	20e8a30293b7b0c63abbc29d0c4c19ee_4617	6db8800965c51df47e711e72bf22185f_4352	0ed7320c6f511ce95f40560feeb5531a_4831	K_pneumoniae_6_02760
WP_004179981.1		sulfite exporter TauE/SafE family protein	6	6	1	1	5584				791	791	791	a177eae4552a0a1383f611870b669525_5290	40b06fe84ca1b8758d0c3f8a0dea34af_4841	20e8a30293b7b0c63abbc29d0c4c19ee_2884	6db8800965c51df47e711e72bf22185f_2884	0ed7320c6f511ce95f40560feeb5531a_3042	K_pneumoniae_6_01912
WP_004179152.1		N-acetylmuramoyl-L-alanine amidase	6	6	1	1	879				830	830	830	a177eae4552a0a1383f611870b669525_7068	40b06fe84ca1b8758d0c3f8a0dea34af_6538	20e8a30293b7b0c63abbc29d0c4c19ee_2313	6db8800965c51df47e711e72bf22185f_1421	0ed7320c6f511ce95f40560feeb5531a_1421	K_pneumoniae_6_00329
WP_004178592.1		FAD-dependent oxidoreductase	6	6	1	1	1699				2033	2033	2033	a177eae4552a0a1383f611870b669525_8794	40b06fe84ca1b8758d0c3f8a0dea34af_8264	20e8a30293b7b0c63abbc29d0c4c19ee_4759	6db8800965c51df47e711e72bf22185f_4210	0ed7320c6f511ce95f40560feeb5531a_4689	K_pneumoniae_6_02692
WP_004179190.1		M20 family metallopeptidase	6	6	1	1	4220				1166	1166	1166	a177eae4552a0a1383f611870b669525_6944	40b06fe84ca1b8758d0c3f8a0dea34af_6414	20e8a30293b7b0c63abbc29d0c4c19ee_5470	6db8800965c51df47e711e72bf22185f_5494	0ed7320c6f511ce95f40560feeb5531a_5973	K_pneumoniae_6_00265
glnQ		glutamine ABC transporter ATP-binding protein GlnQ	6	6	1	1	944				722	722	722	a177eae4552a0a1383f611870b669525_7196	40b06fe84ca1b8758d0c3f8a0dea34af_6666	20e8a30293b7b0c63abbc29d0c4c19ee_2185	6db8800965c51df47e711e72bf22185f_1293	0ed7320c6f511ce95f40560feeb5531a_1293	K_pneumoniae_6_00394
WP_004179774.1		iron-containing alcohol dehydrogenase	6	6	1	1	2657				1148	1148	1148	a177eae4552a0a1383f611870b669525_5640	40b06fe84ca1b8758d0c3f8a0dea34af_4489	20e8a30293b7b0c63abbc29d0c4c19ee_10105	6db8800965c51df47e711e72bf22185f_10298	0ed7320c6f511ce95f40560feeb5531a_8597	K_pneumoniae_6_03812
WP_043906975.1		NinE family protein	6	6	1	1	2279				170	176	171	a177eae4552a0a1383f611870b669525_3883	40b06fe84ca1b8758d0c3f8a0dea34af_3280	20e8a30293b7b0c63abbc29d0c4c19ee_71	6db8800965c51df47e711e72bf22185f_5973	0ed7320c6f511ce95f40560feeb5531a_1545	K_pneumoniae_6_00821
WP_004149434.1		LysR family transcriptional regulator	6	6	1	1	2015				908	908	908	a177eae4552a0a1383f611870b669525_2321	40b06fe84ca1b8758d0c3f8a0dea34af_1705	20e8a30293b7b0c63abbc29d0c4c19ee_3236	6db8800965c51df47e711e72bf22185f_3717	0ed7320c6f511ce95f40560feeb5531a_4196	K_pneumoniae_6_02455
WP_004174089.1		efflux RND transporter permease subunit	6	6	1	1	5122				3110	3110	3110	a177eae4552a0a1383f611870b669525_935	40b06fe84ca1b8758d0c3f8a0dea34af_314	20e8a30293b7b0c63abbc29d0c4c19ee_6385	6db8800965c51df47e711e72bf22185f_6445	0ed7320c6f511ce95f40560feeb5531a_6848	K_pneumoniae_6_03402
hypA		hydrogenase maturation nickel metallochaperone HypA	6	6	1	1	1948				344	344	344	a177eae4552a0a1383f611870b669525_2174	40b06fe84ca1b8758d0c3f8a0dea34af_1558	20e8a30293b7b0c63abbc29d0c4c19ee_3385	6db8800965c51df47e711e72bf22185f_3570	0ed7320c6f511ce95f40560feeb5531a_4049	K_pneumoniae_6_02383
WP_004181617.1		MFS transporter	6	6	1	1	3057				1265	1265	1265	a177eae4552a0a1383f611870b669525_10256	40b06fe84ca1b8758d0c3f8a0dea34af_9728	20e8a30293b7b0c63abbc29d0c4c19ee_8460	6db8800965c51df47e711e72bf22185f_8531	0ed7320c6f511ce95f40560feeb5531a_9030	K_pneumoniae_6_04391
rplS		50S ribosomal protein L19	6	6	1	1	2058				347	347	347	a177eae4552a0a1383f611870b669525_2410	40b06fe84ca1b8758d0c3f8a0dea34af_1794	20e8a30293b7b0c63abbc29d0c4c19ee_3147	6db8800965c51df47e711e72bf22185f_3806	0ed7320c6f511ce95f40560feeb5531a_4285	K_pneumoniae_6_02499
rpoA		DNA-directed RNA polymerase subunit alpha	6	6	1	1	5140				989	989	989	a177eae4552a0a1383f611870b669525_884	40b06fe84ca1b8758d0c3f8a0dea34af_263	20e8a30293b7b0c63abbc29d0c4c19ee_10793	6db8800965c51df47e711e72bf22185f_10878	0ed7320c6f511ce95f40560feeb5531a_10830	K_pneumoniae_6_05162
cecR		transcriptional regulator CecR	6	6	1	1	960				659	659	659	a177eae4552a0a1383f611870b669525_7228	40b06fe84ca1b8758d0c3f8a0dea34af_6698	20e8a30293b7b0c63abbc29d0c4c19ee_2153	6db8800965c51df47e711e72bf22185f_1261	0ed7320c6f511ce95f40560feeb5531a_1261	K_pneumoniae_6_00409
fadB		fatty acid oxidation complex subunit alpha FadB	6	6	1	1	5201				2189	2189	2189	a177eae4552a0a1383f611870b669525_9970	40b06fe84ca1b8758d0c3f8a0dea34af_9442	20e8a30293b7b0c63abbc29d0c4c19ee_8906	6db8800965c51df47e711e72bf22185f_9130	0ed7320c6f511ce95f40560feeb5531a_9437	K_pneumoniae_6_04448
ccmD		heme exporter protein CcmD	6	6	1	1	4008				230	230	230	a177eae4552a0a1383f611870b669525_4655	40b06fe84ca1b8758d0c3f8a0dea34af_5477	20e8a30293b7b0c63abbc29d0c4c19ee_10415	6db8800965c51df47e711e72bf22185f_10500	0ed7320c6f511ce95f40560feeb5531a_10490	K_pneumoniae_6_04993
WP_004143806.1		hypothetical protein	6	6	1	1	5765				362	362	362	a177eae4552a0a1383f611870b669525_4925	40b06fe84ca1b8758d0c3f8a0dea34af_5206	20e8a30293b7b0c63abbc29d0c4c19ee_2518	6db8800965c51df47e711e72bf22185f_2518	0ed7320c6f511ce95f40560feeb5531a_3408	K_pneumoniae_6_02084
WP_061403453.1		phage head morphogenesis protein	6	6	1	1	2266				896	1001	983	a177eae4552a0a1383f611870b669525_3907	40b06fe84ca1b8758d0c3f8a0dea34af_3304	20e8a30293b7b0c63abbc29d0c4c19ee_47	6db8800965c51df47e711e72bf22185f_5997	0ed7320c6f511ce95f40560feeb5531a_1521	K_pneumoniae_6_00809
WP_004178673.1		amidohydrolase	6	6	1	1	1545				770	770	770	a177eae4552a0a1383f611870b669525_8459	40b06fe84ca1b8758d0c3f8a0dea34af_7929	20e8a30293b7b0c63abbc29d0c4c19ee_5567	6db8800965c51df47e711e72bf22185f_30	0ed7320c6f511ce95f40560feeb5531a_30	K_pneumoniae_6_03044
gntX		DNA utilization protein GntX	6	6	1	1	3522				674	674	674	a177eae4552a0a1383f611870b669525_706	40b06fe84ca1b8758d0c3f8a0dea34af_85	20e8a30293b7b0c63abbc29d0c4c19ee_7204	6db8800965c51df47e711e72bf22185f_7319	0ed7320c6f511ce95f40560feeb5531a_8389	K_pneumoniae_6_04298
WP_001444089.1		hypothetical protein	6	6	1	1	43				497	497	497	a177eae4552a0a1383f611870b669525_10406	40b06fe84ca1b8758d0c3f8a0dea34af_9880	20e8a30293b7b0c63abbc29d0c4c19ee_10533	6db8800965c51df47e711e72bf22185f_10618	0ed7320c6f511ce95f40560feeb5531a_10634	K_pneumoniae_6_05067
WP_004176109.1		helix-turn-helix transcriptional regulator	6	6	1	1	5572				557	557	557	a177eae4552a0a1383f611870b669525_5314	40b06fe84ca1b8758d0c3f8a0dea34af_4817	20e8a30293b7b0c63abbc29d0c4c19ee_2908	6db8800965c51df47e711e72bf22185f_2908	0ed7320c6f511ce95f40560feeb5531a_3018	K_pneumoniae_6_01901
WP_004149458.1		metal ABC transporter permease	6	6	1	1	1978				863	863	863	a177eae4552a0a1383f611870b669525_2232	40b06fe84ca1b8758d0c3f8a0dea34af_1616	20e8a30293b7b0c63abbc29d0c4c19ee_3325	6db8800965c51df47e711e72bf22185f_3628	0ed7320c6f511ce95f40560feeb5531a_4107	K_pneumoniae_6_02413
group_1485	asd	aspartate-semialdehyde dehydrogenase	6	6	1	1	3537				1106	1106	1106	a177eae4552a0a1383f611870b669525_676	40b06fe84ca1b8758d0c3f8a0dea34af_55	20e8a30293b7b0c63abbc29d0c4c19ee_7234	6db8800965c51df47e711e72bf22185f_7289	0ed7320c6f511ce95f40560feeb5531a_8419	K_pneumoniae_6_04283
atpF		F0F1 ATP synthase subunit B	6	6	1	1	2942				470	470	470	a177eae4552a0a1383f611870b669525_10374	40b06fe84ca1b8758d0c3f8a0dea34af_9846	20e8a30293b7b0c63abbc29d0c4c19ee_10565	6db8800965c51df47e711e72bf22185f_10650	0ed7320c6f511ce95f40560feeb5531a_10602	K_pneumoniae_6_05051
sodA		superoxide dismutase [Mn]	6	6	1	1	3044				620	620	620	a177eae4552a0a1383f611870b669525_10230	40b06fe84ca1b8758d0c3f8a0dea34af_9702	20e8a30293b7b0c63abbc29d0c4c19ee_8486	6db8800965c51df47e711e72bf22185f_8557	0ed7320c6f511ce95f40560feeb5531a_9004	K_pneumoniae_6_04404
pspC		envelope stress response membrane protein PspC	6	6	1	1	3256				359	359	359	a177eae4552a0a1383f611870b669525_6204	40b06fe84ca1b8758d0c3f8a0dea34af_5595	20e8a30293b7b0c63abbc29d0c4c19ee_6652	6db8800965c51df47e711e72bf22185f_6557	0ed7320c6f511ce95f40560feeb5531a_7447	K_pneumoniae_6_03105
WP_004176102.1		alpha/beta hydrolase	6	6	1	1	5581				695	695	695	a177eae4552a0a1383f611870b669525_5296	40b06fe84ca1b8758d0c3f8a0dea34af_4835	20e8a30293b7b0c63abbc29d0c4c19ee_2890	6db8800965c51df47e711e72bf22185f_2890	0ed7320c6f511ce95f40560feeb5531a_3036	K_pneumoniae_6_01909
group_149		hypothetical protein	6	6	1	1	5390				95	104	96	a177eae4552a0a1383f611870b669525_3971	40b06fe84ca1b8758d0c3f8a0dea34af_3362	20e8a30293b7b0c63abbc29d0c4c19ee_10521	6db8800965c51df47e711e72bf22185f_10524	0ed7320c6f511ce95f40560feeb5531a_8032	K_pneumoniae_6_03395
cas2e		type I-E CRISPR-associated endoribonuclease Cas2e	6	6	1	1	405				287	287	287	a177eae4552a0a1383f611870b669525_4632	40b06fe84ca1b8758d0c3f8a0dea34af_4024	20e8a30293b7b0c63abbc29d0c4c19ee_7661	6db8800965c51df47e711e72bf22185f_8015	0ed7320c6f511ce95f40560feeb5531a_6044	K_pneumoniae_6_03869
mtnA		S-methyl-5-thioribose-1-phosphate isomerase	6	6	1	1	1143				1028	1028	1028	a177eae4552a0a1383f611870b669525_7641	40b06fe84ca1b8758d0c3f8a0dea34af_7111	20e8a30293b7b0c63abbc29d0c4c19ee_1740	6db8800965c51df47e711e72bf22185f_848	0ed7320c6f511ce95f40560feeb5531a_848	K_pneumoniae_6_00606
sufS		cysteine desulfurase SufS	6	6	1	1	345				1220	1220	1220	a177eae4552a0a1383f611870b669525_4509	40b06fe84ca1b8758d0c3f8a0dea34af_3901	20e8a30293b7b0c63abbc29d0c4c19ee_7784	6db8800965c51df47e711e72bf22185f_7892	0ed7320c6f511ce95f40560feeb5531a_6167	K_pneumoniae_6_03929
WP_004144350.1		YfhL family 4Fe-4S dicluster ferredoxin	6	6	1	1	805				260	260	260	a177eae4552a0a1383f611870b669525_2557	40b06fe84ca1b8758d0c3f8a0dea34af_2027	20e8a30293b7b0c63abbc29d0c4c19ee_1318	6db8800965c51df47e711e72bf22185f_2313	0ed7320c6f511ce95f40560feeb5531a_2792	K_pneumoniae_6_01418
gsiB		glutathione ABC transporter substrate-binding protein GsiB	6	6	1	1	917				1541	1541	1541	a177eae4552a0a1383f611870b669525_7144	40b06fe84ca1b8758d0c3f8a0dea34af_6614	20e8a30293b7b0c63abbc29d0c4c19ee_2237	6db8800965c51df47e711e72bf22185f_1345	0ed7320c6f511ce95f40560feeb5531a_1345	K_pneumoniae_6_00367
WP_004179374.1		YbaK/prolyl-tRNA synthetase associated domain-containing protein	6	6	1	1	5350				500	500	500	a177eae4552a0a1383f611870b669525_6471	40b06fe84ca1b8758d0c3f8a0dea34af_5862	20e8a30293b7b0c63abbc29d0c4c19ee_8573	6db8800965c51df47e711e72bf22185f_8644	0ed7320c6f511ce95f40560feeb5531a_9104	K_pneumoniae_6_00003
mdoG		glucans biosynthesis protein MdoG	6	6	1	1	4329				1553	1553	1553	a177eae4552a0a1383f611870b669525_6713	40b06fe84ca1b8758d0c3f8a0dea34af_6184	20e8a30293b7b0c63abbc29d0c4c19ee_5242	6db8800965c51df47e711e72bf22185f_5266	0ed7320c6f511ce95f40560feeb5531a_5745	K_pneumoniae_6_00156
WP_004176366.1		aspartate aminotransferase family protein	6	6	1	1	4095				1205	1205	1205	a177eae4552a0a1383f611870b669525_5942	40b06fe84ca1b8758d0c3f8a0dea34af_4187	20e8a30293b7b0c63abbc29d0c4c19ee_6928	6db8800965c51df47e711e72bf22185f_6972	0ed7320c6f511ce95f40560feeb5531a_7032	K_pneumoniae_6_04081
WP_004180956.1		hypothetical protein	6	6	1	1	2044				800	800	800	a177eae4552a0a1383f611870b669525_2379	40b06fe84ca1b8758d0c3f8a0dea34af_1763	20e8a30293b7b0c63abbc29d0c4c19ee_3178	6db8800965c51df47e711e72bf22185f_3775	0ed7320c6f511ce95f40560feeb5531a_4254	K_pneumoniae_6_02484
rnc		ribonuclease III	6	6	1	1	810				680	680	680	a177eae4552a0a1383f611870b669525_2547	40b06fe84ca1b8758d0c3f8a0dea34af_2017	20e8a30293b7b0c63abbc29d0c4c19ee_1328	6db8800965c51df47e711e72bf22185f_2323	0ed7320c6f511ce95f40560feeb5531a_2802	K_pneumoniae_6_01423
wcaJ		undecaprenyl-phosphate glucose phosphotransferase	6	7	1.17	1	3660				251	1397	1196	a177eae4552a0a1383f611870b669525_3393	40b06fe84ca1b8758d0c3f8a0dea34af_2867	20e8a30293b7b0c63abbc29d0c4c19ee_482	6db8800965c51df47e711e72bf22185f_1477 6db8800965c51df47e711e72bf22185f_5564	0ed7320c6f511ce95f40560feeb5531a_1956	K_pneumoniae_6_01013
znuC		zinc ABC transporter ATP-binding protein ZnuC	6	6	1	1	5381				719	752	735	a177eae4552a0a1383f611870b669525_3989	40b06fe84ca1b8758d0c3f8a0dea34af_3380	20e8a30293b7b0c63abbc29d0c4c19ee_10503	6db8800965c51df47e711e72bf22185f_10542	0ed7320c6f511ce95f40560feeb5531a_8014	K_pneumoniae_6_03386
WP_002887560.1		GNAT family N-acetyltransferase	6	6	1	1	1821				533	533	533	a177eae4552a0a1383f611870b669525_9051	40b06fe84ca1b8758d0c3f8a0dea34af_8521	20e8a30293b7b0c63abbc29d0c4c19ee_5016	6db8800965c51df47e711e72bf22185f_3953	0ed7320c6f511ce95f40560feeb5531a_4432	K_pneumoniae_6_02569
WP_002918740.1		YhdT family protein	6	6	1	1	5115				242	242	242	a177eae4552a0a1383f611870b669525_949	40b06fe84ca1b8758d0c3f8a0dea34af_328	20e8a30293b7b0c63abbc29d0c4c19ee_6371	6db8800965c51df47e711e72bf22185f_6431	0ed7320c6f511ce95f40560feeb5531a_6834	K_pneumoniae_6_03409
WP_002913801.1		phosphoribosylaminoimidazolesuccinocarboxamide synthase	6	6	1	1	706				713	713	713	a177eae4552a0a1383f611870b669525_2755	40b06fe84ca1b8758d0c3f8a0dea34af_2229	20e8a30293b7b0c63abbc29d0c4c19ee_1120	6db8800965c51df47e711e72bf22185f_2115	0ed7320c6f511ce95f40560feeb5531a_2594	K_pneumoniae_6_01321
rutD		pyrimidine utilization protein D	6	6	1	1	4303				803	803	803	a177eae4552a0a1383f611870b669525_6775	40b06fe84ca1b8758d0c3f8a0dea34af_6243	20e8a30293b7b0c63abbc29d0c4c19ee_5301	6db8800965c51df47e711e72bf22185f_5325	0ed7320c6f511ce95f40560feeb5531a_5804	K_pneumoniae_6_00184
WP_043906974.1		hypothetical protein	6	6	1	1	2294				110	110	110	a177eae4552a0a1383f611870b669525_3851	40b06fe84ca1b8758d0c3f8a0dea34af_3248	20e8a30293b7b0c63abbc29d0c4c19ee_103	6db8800965c51df47e711e72bf22185f_5941	0ed7320c6f511ce95f40560feeb5531a_1577	K_pneumoniae_6_00835
WP_004178470.1		HlyD family efflux transporter periplasmic adaptor subunit	6	6	1	1	1874				1067	1067	1067	a177eae4552a0a1383f611870b669525_9159	40b06fe84ca1b8758d0c3f8a0dea34af_8629	20e8a30293b7b0c63abbc29d0c4c19ee_10983	6db8800965c51df47e711e72bf22185f_3845	0ed7320c6f511ce95f40560feeb5531a_4324	K_pneumoniae_6_02517
group_1506	traD	type IV conjugative transfer system coupling protein TraD	6	6	1	1	3141				2312	2312	2312	a177eae4552a0a1383f611870b669525_10785	40b06fe84ca1b8758d0c3f8a0dea34af_10784	20e8a30293b7b0c63abbc29d0c4c19ee_9291	6db8800965c51df47e711e72bf22185f_9214	0ed7320c6f511ce95f40560feeb5531a_9682	K_pneumoniae_6_04631
WP_004178954.1		sugar-binding transcriptional regulator	6	6	1	1	1175				950	950	950	a177eae4552a0a1383f611870b669525_7705	40b06fe84ca1b8758d0c3f8a0dea34af_7175	20e8a30293b7b0c63abbc29d0c4c19ee_1676	6db8800965c51df47e711e72bf22185f_784	0ed7320c6f511ce95f40560feeb5531a_784	K_pneumoniae_6_00638
pobA		4-hydroxybenzoate 3-monooxygenase	6	6	1	1	1805				1184	1184	1184	a177eae4552a0a1383f611870b669525_9019	40b06fe84ca1b8758d0c3f8a0dea34af_8489	20e8a30293b7b0c63abbc29d0c4c19ee_4984	6db8800965c51df47e711e72bf22185f_3985	0ed7320c6f511ce95f40560feeb5531a_4464	K_pneumoniae_6_02585
WP_002916499.1		oxidative stress defense protein	6	6	1	1	4623				767	767	767	a177eae4552a0a1383f611870b669525_1569	40b06fe84ca1b8758d0c3f8a0dea34af_953	20e8a30293b7b0c63abbc29d0c4c19ee_9387	6db8800965c51df47e711e72bf22185f_9472	0ed7320c6f511ce95f40560feeb5531a_9770	K_pneumoniae_6_04673
WP_004151446.1		VirK/YbjX family protein	6	6	1	1	5362				968	1010	975	a177eae4552a0a1383f611870b669525_4029	40b06fe84ca1b8758d0c3f8a0dea34af_3420	20e8a30293b7b0c63abbc29d0c4c19ee_10463	6db8800965c51df47e711e72bf22185f_10582	0ed7320c6f511ce95f40560feeb5531a_7974	K_pneumoniae_6_03368
WP_002913183.1		LysR family transcriptional regulator	6	6	1	1	578				926	926	926	a177eae4552a0a1383f611870b669525_3033	40b06fe84ca1b8758d0c3f8a0dea34af_2507	20e8a30293b7b0c63abbc29d0c4c19ee_842	6db8800965c51df47e711e72bf22185f_1837	0ed7320c6f511ce95f40560feeb5531a_2316	K_pneumoniae_6_01192
WP_023339708.1		hypothetical protein	6	6	1	1	2265				200	200	200	a177eae4552a0a1383f611870b669525_3909	40b06fe84ca1b8758d0c3f8a0dea34af_3306	20e8a30293b7b0c63abbc29d0c4c19ee_45	6db8800965c51df47e711e72bf22185f_5999	0ed7320c6f511ce95f40560feeb5531a_1519	K_pneumoniae_6_00808
WP_002884819.1		diacylglycerol kinase	6	6	1	1	171				368	368	368	a177eae4552a0a1383f611870b669525_9792	40b06fe84ca1b8758d0c3f8a0dea34af_9262	20e8a30293b7b0c63abbc29d0c4c19ee_3900	6db8800965c51df47e711e72bf22185f_5069	0ed7320c6f511ce95f40560feeb5531a_5040	K_pneumoniae_6_01773
panF		sodium/pantothenate symporter	6	6	1	1	5116				1451	1451	1451	a177eae4552a0a1383f611870b669525_947	40b06fe84ca1b8758d0c3f8a0dea34af_326	20e8a30293b7b0c63abbc29d0c4c19ee_6373	6db8800965c51df47e711e72bf22185f_6433	0ed7320c6f511ce95f40560feeb5531a_6836	K_pneumoniae_6_03408
murF		UDP-N-acetylmuramoyl-tripeptide--D-alanyl-D-alanine ligase	6	6	1	1	1685				1358	1358	1358	a177eae4552a0a1383f611870b669525_8764	40b06fe84ca1b8758d0c3f8a0dea34af_8234	20e8a30293b7b0c63abbc29d0c4c19ee_4729	6db8800965c51df47e711e72bf22185f_4240	0ed7320c6f511ce95f40560feeb5531a_4719	K_pneumoniae_6_02706
aroQ		type II 3-dehydroquinate dehydratase	6	6	1	1	5112				452	452	452	a177eae4552a0a1383f611870b669525_955	40b06fe84ca1b8758d0c3f8a0dea34af_334	20e8a30293b7b0c63abbc29d0c4c19ee_6365	6db8800965c51df47e711e72bf22185f_6425	0ed7320c6f511ce95f40560feeb5531a_6828	K_pneumoniae_6_03412
msrP		protein-methionine-sulfoxide reductase catalytic subunit MsrP	6	6	1	1	5110				1001	1001	1001	a177eae4552a0a1383f611870b669525_959	40b06fe84ca1b8758d0c3f8a0dea34af_338	20e8a30293b7b0c63abbc29d0c4c19ee_6361	6db8800965c51df47e711e72bf22185f_6421	0ed7320c6f511ce95f40560feeb5531a_6824	K_pneumoniae_6_03414
hpxD		molybdenum cofactor-independent xanthine hydroxylase subunit HpxD	6	6	1	1	2693				1037	1037	1037	a177eae4552a0a1383f611870b669525_5566	40b06fe84ca1b8758d0c3f8a0dea34af_4563	20e8a30293b7b0c63abbc29d0c4c19ee_10179	6db8800965c51df47e711e72bf22185f_10224	0ed7320c6f511ce95f40560feeb5531a_8671	K_pneumoniae_6_03848
WP_043906775.1		cobalamin-independent methionine synthase II family protein	6	6	1	1	3743				1103	1103	1103	a177eae4552a0a1383f611870b669525_5678	40b06fe84ca1b8758d0c3f8a0dea34af_4451	20e8a30293b7b0c63abbc29d0c4c19ee_10309	6db8800965c51df47e711e72bf22185f_10394	0ed7320c6f511ce95f40560feeb5531a_8559	K_pneumoniae_6_03792
yqaB		fructose-1-phosphate/6-phosphogluconate phosphatase	6	6	1	1	1986				566	566	566	a177eae4552a0a1383f611870b669525_2263	40b06fe84ca1b8758d0c3f8a0dea34af_1647	20e8a30293b7b0c63abbc29d0c4c19ee_3294	6db8800965c51df47e711e72bf22185f_3659	0ed7320c6f511ce95f40560feeb5531a_4138	K_pneumoniae_6_02426
rsmF		16S rRNA (cytosine(1407)-C(5))-methyltransferase RsmF	6	6	1	1	5358				1388	1433	1425	a177eae4552a0a1383f611870b669525_4037	40b06fe84ca1b8758d0c3f8a0dea34af_3428	20e8a30293b7b0c63abbc29d0c4c19ee_10455	6db8800965c51df47e711e72bf22185f_10590	0ed7320c6f511ce95f40560feeb5531a_7966	K_pneumoniae_6_03364
WP_002889292.1		DUF3461 family protein	6	6	1	1	1594				386	386	386	a177eae4552a0a1383f611870b669525_8578	40b06fe84ca1b8758d0c3f8a0dea34af_8048	20e8a30293b7b0c63abbc29d0c4c19ee_4543	6db8800965c51df47e711e72bf22185f_4426	0ed7320c6f511ce95f40560feeb5531a_4905	K_pneumoniae_6_02794
WP_004176445.1		DUF6216 family protein	6	6	1	1	3269				833	833	833	a177eae4552a0a1383f611870b669525_6176	40b06fe84ca1b8758d0c3f8a0dea34af_5567	20e8a30293b7b0c63abbc29d0c4c19ee_6680	6db8800965c51df47e711e72bf22185f_6529	0ed7320c6f511ce95f40560feeb5531a_7475	K_pneumoniae_6_03092
lysM		peptidoglycan-binding protein LysM	6	6	1	1	5519				449	449	449	a177eae4552a0a1383f611870b669525_5420	40b06fe84ca1b8758d0c3f8a0dea34af_4711	20e8a30293b7b0c63abbc29d0c4c19ee_3014	6db8800965c51df47e711e72bf22185f_3014	0ed7320c6f511ce95f40560feeb5531a_2912	K_pneumoniae_6_01851
WP_004178936.1		ABC transporter ATP-binding protein	6	6	1	1	1193				704	704	704	a177eae4552a0a1383f611870b669525_7743	40b06fe84ca1b8758d0c3f8a0dea34af_7213	20e8a30293b7b0c63abbc29d0c4c19ee_1638	6db8800965c51df47e711e72bf22185f_746	0ed7320c6f511ce95f40560feeb5531a_746	K_pneumoniae_6_00656
purM		phosphoribosylformylglycinamidine cyclo-ligase	6	6	1	1	721				1037	1037	1037	a177eae4552a0a1383f611870b669525_2725	40b06fe84ca1b8758d0c3f8a0dea34af_2199	20e8a30293b7b0c63abbc29d0c4c19ee_1150	6db8800965c51df47e711e72bf22185f_2145	0ed7320c6f511ce95f40560feeb5531a_2624	K_pneumoniae_6_01335
solA		N-methyl-L-tryptophan oxidase	6	6	1	1	4337				1118	1118	1118	a177eae4552a0a1383f611870b669525_6697	40b06fe84ca1b8758d0c3f8a0dea34af_6168	20e8a30293b7b0c63abbc29d0c4c19ee_5226	6db8800965c51df47e711e72bf22185f_5250	0ed7320c6f511ce95f40560feeb5531a_5729	K_pneumoniae_6_00148
WP_004180185.1		DinB family protein	6	6	1	1	5837				488	488	488	a177eae4552a0a1383f611870b669525_4772	40b06fe84ca1b8758d0c3f8a0dea34af_5361	20e8a30293b7b0c63abbc29d0c4c19ee_2365	6db8800965c51df47e711e72bf22185f_2365	0ed7320c6f511ce95f40560feeb5531a_3561	K_pneumoniae_6_02158
rpsG		30S ribosomal protein S7	6	6	1	1	5250				470	470	470	a177eae4552a0a1383f611870b669525_820	40b06fe84ca1b8758d0c3f8a0dea34af_199	20e8a30293b7b0c63abbc29d0c4c19ee_7090	6db8800965c51df47e711e72bf22185f_7433	0ed7320c6f511ce95f40560feeb5531a_8275	K_pneumoniae_6_04355
folB		bifunctional dihydroneopterin aldolase/7,8-dihydroneopterin epimerase	6	6	1	1	3822				383	383	383	a177eae4552a0a1383f611870b669525_1355	40b06fe84ca1b8758d0c3f8a0dea34af_734	20e8a30293b7b0c63abbc29d0c4c19ee_10719	6db8800965c51df47e711e72bf22185f_10765	0ed7320c6f511ce95f40560feeb5531a_10756	K_pneumoniae_6_05127
WP_002917681.1		glycerol dehydrogenase	6	6	1	1	4953				1097	1097	1097	a177eae4552a0a1383f611870b669525_1282	40b06fe84ca1b8758d0c3f8a0dea34af_661	20e8a30293b7b0c63abbc29d0c4c19ee_6038	6db8800965c51df47e711e72bf22185f_6098	0ed7320c6f511ce95f40560feeb5531a_6501	K_pneumoniae_6_03571
WP_020324956.1		fatty acid desaturase	6	6	1	1	4710				986	1040	995	a177eae4552a0a1383f611870b669525_4153	40b06fe84ca1b8758d0c3f8a0dea34af_3548	20e8a30293b7b0c63abbc29d0c4c19ee_9165	6db8800965c51df47e711e72bf22185f_9364	0ed7320c6f511ce95f40560feeb5531a_7850	K_pneumoniae_6_03309
WP_015056400.1		TnsD family Tn7-like transposition protein	6	6	1	1	3416				1418	1418	1418	a177eae4552a0a1383f611870b669525_538	40b06fe84ca1b8758d0c3f8a0dea34af_10457	20e8a30293b7b0c63abbc29d0c4c19ee_7371	6db8800965c51df47e711e72bf22185f_7152	0ed7320c6f511ce95f40560feeb5531a_10466	K_pneumoniae_6_04980
alaS		alanine--tRNA ligase	6	6	1	1	1983				2627	2627	2627	a177eae4552a0a1383f611870b669525_2242	40b06fe84ca1b8758d0c3f8a0dea34af_1626	20e8a30293b7b0c63abbc29d0c4c19ee_3315	6db8800965c51df47e711e72bf22185f_3638	0ed7320c6f511ce95f40560feeb5531a_4117	K_pneumoniae_6_02418
WP_002914291.1		DUF2002 family protein	6	6	1	1	2007				362	362	362	a177eae4552a0a1383f611870b669525_2305	40b06fe84ca1b8758d0c3f8a0dea34af_1689	20e8a30293b7b0c63abbc29d0c4c19ee_3252	6db8800965c51df47e711e72bf22185f_3701	0ed7320c6f511ce95f40560feeb5531a_4180	K_pneumoniae_6_02447
feoB		Fe(2+) transporter permease subunit FeoB	6	6	1	1	3518				2318	2318	2318	a177eae4552a0a1383f611870b669525_714	40b06fe84ca1b8758d0c3f8a0dea34af_93	20e8a30293b7b0c63abbc29d0c4c19ee_7196	6db8800965c51df47e711e72bf22185f_7327	0ed7320c6f511ce95f40560feeb5531a_8381	K_pneumoniae_6_04302
arnE		4-amino-4-deoxy-L-arabinose-phosphoundecaprenol flippase subunit ArnE	6	6	1	1	3441				338	338	338	a177eae4552a0a1383f611870b669525_588	40b06fe84ca1b8758d0c3f8a0dea34af_10507	20e8a30293b7b0c63abbc29d0c4c19ee_7320	6db8800965c51df47e711e72bf22185f_7203	0ed7320c6f511ce95f40560feeb5531a_10415	K_pneumoniae_6_04957
dinB		DNA polymerase IV	6	6	1	1	1532				1055	1055	1055	a177eae4552a0a1383f611870b669525_8433	40b06fe84ca1b8758d0c3f8a0dea34af_7903	20e8a30293b7b0c63abbc29d0c4c19ee_5593	6db8800965c51df47e711e72bf22185f_56	0ed7320c6f511ce95f40560feeb5531a_56	K_pneumoniae_6_03031
WP_032417026.1		ATP-binding protein	6	6	1	1	2107				749	749	749	a177eae4552a0a1383f611870b669525_2523	40b06fe84ca1b8758d0c3f8a0dea34af_1907	20e8a30293b7b0c63abbc29d0c4c19ee_9904	6db8800965c51df47e711e72bf22185f_9989	0ed7320c6f511ce95f40560feeb5531a_10287	K_pneumoniae_6_04908
pduB		propanediol utilization microcompartment protein PduB	6	6	1	1	4470				812	812	812	a177eae4552a0a1383f611870b669525_1878	40b06fe84ca1b8758d0c3f8a0dea34af_1262	20e8a30293b7b0c63abbc29d0c4c19ee_3681	6db8800965c51df47e711e72bf22185f_3274	0ed7320c6f511ce95f40560feeb5531a_3753	K_pneumoniae_6_02242
WP_004178941.1		GNAT family N-acetyltransferase	6	6	1	1	1188				695	695	695	a177eae4552a0a1383f611870b669525_7733	40b06fe84ca1b8758d0c3f8a0dea34af_7203	20e8a30293b7b0c63abbc29d0c4c19ee_1648	6db8800965c51df47e711e72bf22185f_756	0ed7320c6f511ce95f40560feeb5531a_756	K_pneumoniae_6_00651
WP_004197491.1		RluA family pseudouridine synthase	6	6	1	1	4733				698	767	709	a177eae4552a0a1383f611870b669525_4199	40b06fe84ca1b8758d0c3f8a0dea34af_3594	20e8a30293b7b0c63abbc29d0c4c19ee_9211	6db8800965c51df47e711e72bf22185f_9318	0ed7320c6f511ce95f40560feeb5531a_7804	K_pneumoniae_6_03289
WP_004151646.1		alpha/beta fold hydrolase	6	6	1	1	5520				872	872	872	a177eae4552a0a1383f611870b669525_5418	40b06fe84ca1b8758d0c3f8a0dea34af_4713	20e8a30293b7b0c63abbc29d0c4c19ee_3012	6db8800965c51df47e711e72bf22185f_3012	0ed7320c6f511ce95f40560feeb5531a_2914	K_pneumoniae_6_01852
WP_004149452.1		helix-turn-helix transcriptional regulator	6	6	1	1	1990				767	767	767	a177eae4552a0a1383f611870b669525_2271	40b06fe84ca1b8758d0c3f8a0dea34af_1655	20e8a30293b7b0c63abbc29d0c4c19ee_3286	6db8800965c51df47e711e72bf22185f_3667	0ed7320c6f511ce95f40560feeb5531a_4146	K_pneumoniae_6_02430
WP_004178368.1		GNAT family N-acetyltransferase	6	6	1	1	5999				527	527	527	a177eae4552a0a1383f611870b669525_9394	40b06fe84ca1b8758d0c3f8a0dea34af_8864	20e8a30293b7b0c63abbc29d0c4c19ee_4298	6db8800965c51df47e711e72bf22185f_4671	0ed7320c6f511ce95f40560feeb5531a_5438	K_pneumoniae_6_01581
mdtG		multidrug efflux MFS transporter MdtG	6	6	1	1	4333				1226	1226	1226	a177eae4552a0a1383f611870b669525_6705	40b06fe84ca1b8758d0c3f8a0dea34af_6176	20e8a30293b7b0c63abbc29d0c4c19ee_5234	6db8800965c51df47e711e72bf22185f_5258	0ed7320c6f511ce95f40560feeb5531a_5737	K_pneumoniae_6_00152
WP_043906914.1		hypothetical protein	6	6	1	1	2093				308	308	308	a177eae4552a0a1383f611870b669525_2493	40b06fe84ca1b8758d0c3f8a0dea34af_1877	20e8a30293b7b0c63abbc29d0c4c19ee_9874	6db8800965c51df47e711e72bf22185f_9959	0ed7320c6f511ce95f40560feeb5531a_10257	K_pneumoniae_6_04894
purK		5-(carboxyamino)imidazole ribonucleotide synthase	6	6	1	1	1296				1067	1067	1067	a177eae4552a0a1383f611870b669525_7954	40b06fe84ca1b8758d0c3f8a0dea34af_7424	20e8a30293b7b0c63abbc29d0c4c19ee_1427	6db8800965c51df47e711e72bf22185f_535	0ed7320c6f511ce95f40560feeb5531a_535	K_pneumoniae_6_00757
mutS		DNA mismatch repair protein MutS	6	6	1	1	1916				2561	2561	2561	a177eae4552a0a1383f611870b669525_2110	40b06fe84ca1b8758d0c3f8a0dea34af_1494	20e8a30293b7b0c63abbc29d0c4c19ee_3449	6db8800965c51df47e711e72bf22185f_3506	0ed7320c6f511ce95f40560feeb5531a_3985	K_pneumoniae_6_02352
WP_004180067.1		alpha-amylase family protein	6	6	1	1	5640				1625	1625	1625	a177eae4552a0a1383f611870b669525_5175	40b06fe84ca1b8758d0c3f8a0dea34af_4956	20e8a30293b7b0c63abbc29d0c4c19ee_2768	6db8800965c51df47e711e72bf22185f_2768	0ed7320c6f511ce95f40560feeb5531a_3158	K_pneumoniae_6_01967
phnF		phosphonate metabolism transcriptional regulator PhnF	6	6	1	1	99				725	725	725	a177eae4552a0a1383f611870b669525_9648	40b06fe84ca1b8758d0c3f8a0dea34af_9118	20e8a30293b7b0c63abbc29d0c4c19ee_4044	6db8800965c51df47e711e72bf22185f_4925	0ed7320c6f511ce95f40560feeb5531a_5184	K_pneumoniae_6_01703
WP_019705538.1		restriction endonuclease	6	6	1	1	5867				1007	1007	1007	a177eae4552a0a1383f611870b669525_9255	40b06fe84ca1b8758d0c3f8a0dea34af_8725	20e8a30293b7b0c63abbc29d0c4c19ee_4437	6db8800965c51df47e711e72bf22185f_4532	0ed7320c6f511ce95f40560feeb5531a_5577	K_pneumoniae_6_01515
group_155	tssG	type VI secretion system baseplate subunit TssG	6	6	1	1	4674				1016	1046	1021	a177eae4552a0a1383f611870b669525_4243	40b06fe84ca1b8758d0c3f8a0dea34af_3638	20e8a30293b7b0c63abbc29d0c4c19ee_10083	6db8800965c51df47e711e72bf22185f_10095	0ed7320c6f511ce95f40560feeb5531a_6430	K_pneumoniae_6_03270
WP_002915543.1		DUF423 domain-containing protein	6	6	1	1	4427				395	395	395	a177eae4552a0a1383f611870b669525_1976	40b06fe84ca1b8758d0c3f8a0dea34af_1360	20e8a30293b7b0c63abbc29d0c4c19ee_3583	6db8800965c51df47e711e72bf22185f_3372	0ed7320c6f511ce95f40560feeb5531a_3851	K_pneumoniae_6_02286
tsaB		tRNA (adenosine(37)-N6)-threonylcarbamoyltransferase complex dimerization subunit type 1 TsaB	6	6	1	1	237				695	695	695	a177eae4552a0a1383f611870b669525_4095	40b06fe84ca1b8758d0c3f8a0dea34af_3490	20e8a30293b7b0c63abbc29d0c4c19ee_9107	6db8800965c51df47e711e72bf22185f_9422	0ed7320c6f511ce95f40560feeb5531a_7908	K_pneumoniae_6_03337
degS		outer membrane-stress sensor serine endopeptidase DegS	6	6	1	1	5082				1058	1058	1058	a177eae4552a0a1383f611870b669525_1015	40b06fe84ca1b8758d0c3f8a0dea34af_394	20e8a30293b7b0c63abbc29d0c4c19ee_6305	6db8800965c51df47e711e72bf22185f_6365	0ed7320c6f511ce95f40560feeb5531a_6768	K_pneumoniae_6_03441
queC		7-cyano-7-deazaguanine synthase QueC	6	6	1	1	1369				701	701	701	a177eae4552a0a1383f611870b669525_8104	40b06fe84ca1b8758d0c3f8a0dea34af_7574	20e8a30293b7b0c63abbc29d0c4c19ee_5922	6db8800965c51df47e711e72bf22185f_385	0ed7320c6f511ce95f40560feeb5531a_385	K_pneumoniae_6_02870
fldB		flavodoxin FldB	6	6	1	1	4598				521	521	521	a177eae4552a0a1383f611870b669525_1622	40b06fe84ca1b8758d0c3f8a0dea34af_1006	20e8a30293b7b0c63abbc29d0c4c19ee_9440	6db8800965c51df47e711e72bf22185f_9525	0ed7320c6f511ce95f40560feeb5531a_9823	K_pneumoniae_6_04698
WP_004140529.1		glutathione-dependent formaldehyde dehydrogenase	6	6	1	1	5281				1193	1193	1193	a177eae4552a0a1383f611870b669525_6531	40b06fe84ca1b8758d0c3f8a0dea34af_6002	20e8a30293b7b0c63abbc29d0c4c19ee_8713	6db8800965c51df47e711e72bf22185f_8784	0ed7320c6f511ce95f40560feeb5531a_9244	K_pneumoniae_6_00069
moeA		molybdopterin molybdotransferase MoeA	6	6	1	1	920				1235	1235	1235	a177eae4552a0a1383f611870b669525_7150	40b06fe84ca1b8758d0c3f8a0dea34af_6620	20e8a30293b7b0c63abbc29d0c4c19ee_2231	6db8800965c51df47e711e72bf22185f_1339	0ed7320c6f511ce95f40560feeb5531a_1339	K_pneumoniae_6_00370
mtgA		monofunctional biosynthetic peptidoglycan transglycosylase	6	6	1	1	5064				725	725	725	a177eae4552a0a1383f611870b669525_1051	40b06fe84ca1b8758d0c3f8a0dea34af_430	20e8a30293b7b0c63abbc29d0c4c19ee_6269	6db8800965c51df47e711e72bf22185f_6329	0ed7320c6f511ce95f40560feeb5531a_6732	K_pneumoniae_6_03458
WP_004179228.1		type I secretion system permease/ATPase	6	6	1	1	4250				2147	2147	2147	a177eae4552a0a1383f611870b669525_6884	40b06fe84ca1b8758d0c3f8a0dea34af_6354	20e8a30293b7b0c63abbc29d0c4c19ee_5410	6db8800965c51df47e711e72bf22185f_5434	0ed7320c6f511ce95f40560feeb5531a_5913	K_pneumoniae_6_00236
acpP		acyl carrier protein	6	6	1	1	4358				236	236	236	a177eae4552a0a1383f611870b669525_6655	40b06fe84ca1b8758d0c3f8a0dea34af_6126	20e8a30293b7b0c63abbc29d0c4c19ee_5184	6db8800965c51df47e711e72bf22185f_5208	0ed7320c6f511ce95f40560feeb5531a_5687	K_pneumoniae_6_00127
tdk		thymidine kinase	6	6	1	1	274				527	617	602	a177eae4552a0a1383f611870b669525_4365	40b06fe84ca1b8758d0c3f8a0dea34af_3757	20e8a30293b7b0c63abbc29d0c4c19ee_7928	6db8800965c51df47e711e72bf22185f_7748	0ed7320c6f511ce95f40560feeb5531a_6311	K_pneumoniae_6_03996
WP_004178486.1		DUF1127 domain-containing protein	6	6	1	1	1863				164	164	164	a177eae4552a0a1383f611870b669525_9137	40b06fe84ca1b8758d0c3f8a0dea34af_8607	20e8a30293b7b0c63abbc29d0c4c19ee_5102	6db8800965c51df47e711e72bf22185f_3867	0ed7320c6f511ce95f40560feeb5531a_4346	K_pneumoniae_6_02528
hemN		oxygen-independent coproporphyrinogen III oxidase	6	6	1	1	3082				1373	1373	1373	a177eae4552a0a1383f611870b669525_10304	40b06fe84ca1b8758d0c3f8a0dea34af_9776	20e8a30293b7b0c63abbc29d0c4c19ee_8412	6db8800965c51df47e711e72bf22185f_8483	0ed7320c6f511ce95f40560feeb5531a_9078	K_pneumoniae_6_04366
WP_043906805.1		GIY-YIG nuclease family protein	6	6	1	1	4709				857	857	857	a177eae4552a0a1383f611870b669525_4151	40b06fe84ca1b8758d0c3f8a0dea34af_3546	20e8a30293b7b0c63abbc29d0c4c19ee_9163	6db8800965c51df47e711e72bf22185f_9366	0ed7320c6f511ce95f40560feeb5531a_7852	K_pneumoniae_6_03310
WP_002913339.1		elongation factor P hydroxylase	6	6	1	1	616				548	548	548	a177eae4552a0a1383f611870b669525_2957	40b06fe84ca1b8758d0c3f8a0dea34af_2431	20e8a30293b7b0c63abbc29d0c4c19ee_918	6db8800965c51df47e711e72bf22185f_1913	0ed7320c6f511ce95f40560feeb5531a_2392	K_pneumoniae_6_01228
WP_004176581.1		MFS transporter	6	6	1	1	4347				1214	1214	1214	a177eae4552a0a1383f611870b669525_6677	40b06fe84ca1b8758d0c3f8a0dea34af_6148	20e8a30293b7b0c63abbc29d0c4c19ee_5206	6db8800965c51df47e711e72bf22185f_5230	0ed7320c6f511ce95f40560feeb5531a_5709	K_pneumoniae_6_00138
gyrA		DNA topoisomerase (ATP-hydrolyzing) subunit A	6	6	1	1	540				2633	2633	2633	a177eae4552a0a1383f611870b669525_3111	40b06fe84ca1b8758d0c3f8a0dea34af_2585	20e8a30293b7b0c63abbc29d0c4c19ee_764	6db8800965c51df47e711e72bf22185f_1759	0ed7320c6f511ce95f40560feeb5531a_2238	K_pneumoniae_6_01152
WP_004177856.1		GNAT family N-acetyltransferase	6	6	1	1	4900				509	509	509	a177eae4552a0a1383f611870b669525_9822	40b06fe84ca1b8758d0c3f8a0dea34af_9294	20e8a30293b7b0c63abbc29d0c4c19ee_3870	6db8800965c51df47e711e72bf22185f_5099	0ed7320c6f511ce95f40560feeb5531a_5010	K_pneumoniae_6_01788
mepA		penicillin-insensitive murein endopeptidase	6	6	1	1	618				824	824	824	a177eae4552a0a1383f611870b669525_2953	40b06fe84ca1b8758d0c3f8a0dea34af_2427	20e8a30293b7b0c63abbc29d0c4c19ee_922	6db8800965c51df47e711e72bf22185f_1917	0ed7320c6f511ce95f40560feeb5531a_2396	K_pneumoniae_6_01230
carA		glutamine-hydrolyzing carbamoyl-phosphate synthase small subunit	6	6	1	1	1736				1148	1148	1148	a177eae4552a0a1383f611870b669525_8867	40b06fe84ca1b8758d0c3f8a0dea34af_8337	20e8a30293b7b0c63abbc29d0c4c19ee_4832	6db8800965c51df47e711e72bf22185f_4137	0ed7320c6f511ce95f40560feeb5531a_4616	K_pneumoniae_6_02655
hupB		DNA-binding protein HU-beta	6	6	1	1	1373				272	272	272	a177eae4552a0a1383f611870b669525_8112	40b06fe84ca1b8758d0c3f8a0dea34af_7582	20e8a30293b7b0c63abbc29d0c4c19ee_5914	6db8800965c51df47e711e72bf22185f_377	0ed7320c6f511ce95f40560feeb5531a_377	K_pneumoniae_6_02874
WP_004194006.1		YciY family protein	6	6	1	1	286				173	206	178	a177eae4552a0a1383f611870b669525_4389	40b06fe84ca1b8758d0c3f8a0dea34af_3781	20e8a30293b7b0c63abbc29d0c4c19ee_7904	6db8800965c51df47e711e72bf22185f_7772	0ed7320c6f511ce95f40560feeb5531a_6287	K_pneumoniae_6_03985
fhuD		Fe(3+)-hydroxamate ABC transporter substrate-binding protein FhuD	6	6	1	1	1605				890	890	890	a177eae4552a0a1383f611870b669525_8600	40b06fe84ca1b8758d0c3f8a0dea34af_8070	20e8a30293b7b0c63abbc29d0c4c19ee_4565	6db8800965c51df47e711e72bf22185f_4404	0ed7320c6f511ce95f40560feeb5531a_4883	K_pneumoniae_6_02783
dps		DNA starvation/stationary phase protection protein Dps	6	6	1	1	941				503	503	503	a177eae4552a0a1383f611870b669525_7190	40b06fe84ca1b8758d0c3f8a0dea34af_6660	20e8a30293b7b0c63abbc29d0c4c19ee_2191	6db8800965c51df47e711e72bf22185f_1299	0ed7320c6f511ce95f40560feeb5531a_1299	K_pneumoniae_6_00391
WP_043906723.1		hypothetical protein	6	6	1	1	2296				971	971	971	a177eae4552a0a1383f611870b669525_3847	40b06fe84ca1b8758d0c3f8a0dea34af_3244	20e8a30293b7b0c63abbc29d0c4c19ee_107	6db8800965c51df47e711e72bf22185f_5937	0ed7320c6f511ce95f40560feeb5531a_1581	K_pneumoniae_6_00837
WP_004180979.1		NAD(P)H-dependent oxidoreductase	6	6	1	1	2014				605	605	605	a177eae4552a0a1383f611870b669525_2319	40b06fe84ca1b8758d0c3f8a0dea34af_1703	20e8a30293b7b0c63abbc29d0c4c19ee_3238	6db8800965c51df47e711e72bf22185f_3715	0ed7320c6f511ce95f40560feeb5531a_4194	K_pneumoniae_6_02454
WP_004176629.1		ABC transporter substrate-binding protein	6	6	1	1	4261				1652	1652	1652	a177eae4552a0a1383f611870b669525_6862	40b06fe84ca1b8758d0c3f8a0dea34af_6330	20e8a30293b7b0c63abbc29d0c4c19ee_5388	6db8800965c51df47e711e72bf22185f_5412	0ed7320c6f511ce95f40560feeb5531a_5891	K_pneumoniae_6_00225
fadA		acetyl-CoA C-acyltransferase FadA	6	6	1	1	5200				1163	1163	1163	a177eae4552a0a1383f611870b669525_9972	40b06fe84ca1b8758d0c3f8a0dea34af_9444	20e8a30293b7b0c63abbc29d0c4c19ee_8908	6db8800965c51df47e711e72bf22185f_9128	0ed7320c6f511ce95f40560feeb5531a_9439	K_pneumoniae_6_04449
WP_002888816.1		glucose/quinate/shikimate family membrane-bound PQQ-dependent dehydrogenase	6	6	1	1	1643				2390	2390	2390	a177eae4552a0a1383f611870b669525_8678	40b06fe84ca1b8758d0c3f8a0dea34af_8148	20e8a30293b7b0c63abbc29d0c4c19ee_4643	6db8800965c51df47e711e72bf22185f_4326	0ed7320c6f511ce95f40560feeb5531a_4805	K_pneumoniae_6_02748
iscR		Fe-S cluster assembly transcriptional regulator IscR	6	6	1	1	781				491	491	491	a177eae4552a0a1383f611870b669525_2605	40b06fe84ca1b8758d0c3f8a0dea34af_2079	20e8a30293b7b0c63abbc29d0c4c19ee_1270	6db8800965c51df47e711e72bf22185f_2265	0ed7320c6f511ce95f40560feeb5531a_2744	K_pneumoniae_6_01394
WP_004171484.1		hypothetical protein	6	6	1	1	3120				218	218	218	a177eae4552a0a1383f611870b669525_10829	40b06fe84ca1b8758d0c3f8a0dea34af_10740	20e8a30293b7b0c63abbc29d0c4c19ee_9247	6db8800965c51df47e711e72bf22185f_9170	0ed7320c6f511ce95f40560feeb5531a_9726	K_pneumoniae_6_04652
WP_002923294.1		GNAT family N-acetyltransferase	6	6	1	1	4800				446	446	446	a177eae4552a0a1383f611870b669525_64	40b06fe84ca1b8758d0c3f8a0dea34af_10069	20e8a30293b7b0c63abbc29d0c4c19ee_9729	6db8800965c51df47e711e72bf22185f_9814	0ed7320c6f511ce95f40560feeb5531a_10177	K_pneumoniae_6_01475
infC		translation initiation factor IF-3	6	6	1	1	297				434	542	524	a177eae4552a0a1383f611870b669525_4411	40b06fe84ca1b8758d0c3f8a0dea34af_3803	20e8a30293b7b0c63abbc29d0c4c19ee_7882	6db8800965c51df47e711e72bf22185f_7794	0ed7320c6f511ce95f40560feeb5531a_6265	K_pneumoniae_6_03975
WP_004178926.1		transporter substrate-binding domain-containing protein	6	6	1	1	1199				851	851	851	a177eae4552a0a1383f611870b669525_7755	40b06fe84ca1b8758d0c3f8a0dea34af_7225	20e8a30293b7b0c63abbc29d0c4c19ee_1626	6db8800965c51df47e711e72bf22185f_734	0ed7320c6f511ce95f40560feeb5531a_734	K_pneumoniae_6_00662
group_1581	tssJ	type VI secretion system lipoprotein TssJ	6	6	1	1	4673				536	536	536	a177eae4552a0a1383f611870b669525_4245	40b06fe84ca1b8758d0c3f8a0dea34af_3640	20e8a30293b7b0c63abbc29d0c4c19ee_10081	6db8800965c51df47e711e72bf22185f_10097	0ed7320c6f511ce95f40560feeb5531a_6428	K_pneumoniae_6_03269
WP_004179100.1		ABC transporter permease	6	6	1	1	963				1133	1133	1133	a177eae4552a0a1383f611870b669525_7234	40b06fe84ca1b8758d0c3f8a0dea34af_6704	20e8a30293b7b0c63abbc29d0c4c19ee_2147	6db8800965c51df47e711e72bf22185f_1255	0ed7320c6f511ce95f40560feeb5531a_1255	K_pneumoniae_6_00412
yihX		glucose-1-phosphatase	6	6	1	1	3076				599	599	599	a177eae4552a0a1383f611870b669525_10292	40b06fe84ca1b8758d0c3f8a0dea34af_9764	20e8a30293b7b0c63abbc29d0c4c19ee_8424	6db8800965c51df47e711e72bf22185f_8495	0ed7320c6f511ce95f40560feeb5531a_9066	K_pneumoniae_6_04372
WP_004179026.1		adenosylcobalamin/alpha-ribazole phosphatase	6	6	1	1	1098				629	629	629	a177eae4552a0a1383f611870b669525_7551	40b06fe84ca1b8758d0c3f8a0dea34af_7021	20e8a30293b7b0c63abbc29d0c4c19ee_1830	6db8800965c51df47e711e72bf22185f_938	0ed7320c6f511ce95f40560feeb5531a_938	K_pneumoniae_6_00561
WP_004152754.1		DNA polymerase III subunit theta	6	6	1	1	2161				254	254	254	a177eae4552a0a1383f611870b669525_10907	40b06fe84ca1b8758d0c3f8a0dea34af_10874	20e8a30293b7b0c63abbc29d0c4c19ee_11021	6db8800965c51df47e711e72bf22185f_11064	0ed7320c6f511ce95f40560feeb5531a_11064	K_pneumoniae_6_05327
WP_004179405.1		ABC transporter substrate-binding protein	6	6	1	1	2205				1178	1178	1178	a177eae4552a0a1383f611870b669525_6393	40b06fe84ca1b8758d0c3f8a0dea34af_5784	20e8a30293b7b0c63abbc29d0c4c19ee_6463	6db8800965c51df47e711e72bf22185f_6746	0ed7320c6f511ce95f40560feeb5531a_7258	K_pneumoniae_6_03196
WP_004179529.1		LysR family transcriptional regulator	6	6	1	1	3286				914	914	914	a177eae4552a0a1383f611870b669525_6136	40b06fe84ca1b8758d0c3f8a0dea34af_5527	20e8a30293b7b0c63abbc29d0c4c19ee_6720	6db8800965c51df47e711e72bf22185f_6489	0ed7320c6f511ce95f40560feeb5531a_10898	K_pneumoniae_6_03073
yajD		HNH nuclease YajD	6	6	1	1	2221				344	344	344	a177eae4552a0a1383f611870b669525_6425	40b06fe84ca1b8758d0c3f8a0dea34af_5816	20e8a30293b7b0c63abbc29d0c4c19ee_6431	6db8800965c51df47e711e72bf22185f_6778	0ed7320c6f511ce95f40560feeb5531a_7226	K_pneumoniae_6_03212
WP_004178912.1		ABC transporter permease	6	6	1	1	1206				893	893	893	a177eae4552a0a1383f611870b669525_7769	40b06fe84ca1b8758d0c3f8a0dea34af_7239	20e8a30293b7b0c63abbc29d0c4c19ee_1612	6db8800965c51df47e711e72bf22185f_720	0ed7320c6f511ce95f40560feeb5531a_720	K_pneumoniae_6_00669
WP_002909094.1		RidA family protein	6	6	1	1	304				353	368	355	a177eae4552a0a1383f611870b669525_4426	40b06fe84ca1b8758d0c3f8a0dea34af_3818	20e8a30293b7b0c63abbc29d0c4c19ee_7867	6db8800965c51df47e711e72bf22185f_7809	0ed7320c6f511ce95f40560feeb5531a_6250	K_pneumoniae_6_03969
mazG		nucleoside triphosphate pyrophosphohydrolase	6	6	1	1	1885				791	791	791	a177eae4552a0a1383f611870b669525_2048	40b06fe84ca1b8758d0c3f8a0dea34af_1432	20e8a30293b7b0c63abbc29d0c4c19ee_3511	6db8800965c51df47e711e72bf22185f_3444	0ed7320c6f511ce95f40560feeb5531a_3923	K_pneumoniae_6_02321
xthA		exodeoxyribonuclease III	6	6	1	1	2201				806	806	806	a177eae4552a0a1383f611870b669525_6385	40b06fe84ca1b8758d0c3f8a0dea34af_5776	20e8a30293b7b0c63abbc29d0c4c19ee_6471	6db8800965c51df47e711e72bf22185f_6738	0ed7320c6f511ce95f40560feeb5531a_7266	K_pneumoniae_6_03192
WP_002911497.1		glycoside hydrolase family 105 protein	6	6	1	1	2313				1139	1139	1139	a177eae4552a0a1383f611870b669525_3811	40b06fe84ca1b8758d0c3f8a0dea34af_3208	20e8a30293b7b0c63abbc29d0c4c19ee_143	6db8800965c51df47e711e72bf22185f_5901	0ed7320c6f511ce95f40560feeb5531a_1617	K_pneumoniae_6_00856
WP_002914277.1		metalloregulator ArsR/SmtB family transcription factor	6	6	1	1	2013				299	299	299	a177eae4552a0a1383f611870b669525_2317	40b06fe84ca1b8758d0c3f8a0dea34af_1701	20e8a30293b7b0c63abbc29d0c4c19ee_3240	6db8800965c51df47e711e72bf22185f_3713	0ed7320c6f511ce95f40560feeb5531a_4192	K_pneumoniae_6_02453
sdhC		succinate dehydrogenase cytochrome b556 subunit	6	6	1	1	1045				404	404	404	a177eae4552a0a1383f611870b669525_7422	40b06fe84ca1b8758d0c3f8a0dea34af_6892	20e8a30293b7b0c63abbc29d0c4c19ee_1959	6db8800965c51df47e711e72bf22185f_1067	0ed7320c6f511ce95f40560feeb5531a_1067	K_pneumoniae_6_00501
ydiK		AI-2E family transporter YdiK	6	6	1	1	320				1112	1112	1112	a177eae4552a0a1383f611870b669525_4459	40b06fe84ca1b8758d0c3f8a0dea34af_3851	20e8a30293b7b0c63abbc29d0c4c19ee_7834	6db8800965c51df47e711e72bf22185f_7842	0ed7320c6f511ce95f40560feeb5531a_6217	K_pneumoniae_6_03954
WP_004145917.1		hypothetical protein	6	6	1	1	1646				410	410	410	a177eae4552a0a1383f611870b669525_8684	40b06fe84ca1b8758d0c3f8a0dea34af_8154	20e8a30293b7b0c63abbc29d0c4c19ee_4649	6db8800965c51df47e711e72bf22185f_4320	0ed7320c6f511ce95f40560feeb5531a_4799	K_pneumoniae_6_02745
WP_004181443.1		YccS/YhfK family putative transporter	6	6	1	1	5232				2078	2078	2078	a177eae4552a0a1383f611870b669525_784	40b06fe84ca1b8758d0c3f8a0dea34af_163	20e8a30293b7b0c63abbc29d0c4c19ee_7126	6db8800965c51df47e711e72bf22185f_7397	0ed7320c6f511ce95f40560feeb5531a_8311	K_pneumoniae_6_04337
lysS		lysine--tRNA ligase	6	6	1	1	4592				1517	1517	1517	a177eae4552a0a1383f611870b669525_1633	40b06fe84ca1b8758d0c3f8a0dea34af_1017	20e8a30293b7b0c63abbc29d0c4c19ee_9451	6db8800965c51df47e711e72bf22185f_9536	0ed7320c6f511ce95f40560feeb5531a_9834	K_pneumoniae_6_04703
marB		multiple antibiotic resistance protein MarB	6	6	1	1	3734				218	218	218	a177eae4552a0a1383f611870b669525_5660	40b06fe84ca1b8758d0c3f8a0dea34af_4469	20e8a30293b7b0c63abbc29d0c4c19ee_10327	6db8800965c51df47e711e72bf22185f_10412	0ed7320c6f511ce95f40560feeb5531a_8577	K_pneumoniae_6_03802
WP_043906757.1		hypothetical protein	6	7	1.17	1	2156				689	1322	821	a177eae4552a0a1383f611870b669525_3959	40b06fe84ca1b8758d0c3f8a0dea34af_3350	20e8a30293b7b0c63abbc29d0c4c19ee_12041	6db8800965c51df47e711e72bf22185f_12024 6db8800965c51df47e711e72bf22185f_11315	0ed7320c6f511ce95f40560feeb5531a_11301	K_pneumoniae_6_05377
WP_004225487.1		MFS transporter	6	6	1	1	328				1187	1232	1194	a177eae4552a0a1383f611870b669525_4473	40b06fe84ca1b8758d0c3f8a0dea34af_3865	20e8a30293b7b0c63abbc29d0c4c19ee_7820	6db8800965c51df47e711e72bf22185f_7856	0ed7320c6f511ce95f40560feeb5531a_6203	K_pneumoniae_6_03946
WP_004179772.1		dihydrodipicolinate synthase family protein	6	6	1	1	2656				884	884	884	a177eae4552a0a1383f611870b669525_5642	40b06fe84ca1b8758d0c3f8a0dea34af_4487	20e8a30293b7b0c63abbc29d0c4c19ee_10103	6db8800965c51df47e711e72bf22185f_10300	0ed7320c6f511ce95f40560feeb5531a_8595	K_pneumoniae_6_03811
ecpA		common pilus major fimbrillin subunit EcpA	6	6	1	1	1489				587	587	587	a177eae4552a0a1383f611870b669525_8344	40b06fe84ca1b8758d0c3f8a0dea34af_7814	20e8a30293b7b0c63abbc29d0c4c19ee_5682	6db8800965c51df47e711e72bf22185f_145	0ed7320c6f511ce95f40560feeb5531a_145	K_pneumoniae_6_02987
WP_002890215.1		DUF2754 family protein	6	6	1	1	1455				203	203	203	a177eae4552a0a1383f611870b669525_8276	40b06fe84ca1b8758d0c3f8a0dea34af_7746	20e8a30293b7b0c63abbc29d0c4c19ee_5750	6db8800965c51df47e711e72bf22185f_213	0ed7320c6f511ce95f40560feeb5531a_213	K_pneumoniae_6_02955
WP_004164973.1		O-antigen ligase family protein	6	6	1	1	213				1169	1169	1169	a177eae4552a0a1383f611870b669525_297	40b06fe84ca1b8758d0c3f8a0dea34af_10216	20e8a30293b7b0c63abbc29d0c4c19ee_7566	6db8800965c51df47e711e72bf22185f_7531	0ed7320c6f511ce95f40560feeb5531a_7690	K_pneumoniae_6_03675
rraA		ribonuclease E activity regulator RraA	6	6	1	1	3037				485	485	485	a177eae4552a0a1383f611870b669525_10216	40b06fe84ca1b8758d0c3f8a0dea34af_9688	20e8a30293b7b0c63abbc29d0c4c19ee_8500	6db8800965c51df47e711e72bf22185f_8571	0ed7320c6f511ce95f40560feeb5531a_8990	K_pneumoniae_6_04411
eutB		ethanolamine ammonia-lyase subunit alpha	6	6	1	1	680				1361	1361	1361	a177eae4552a0a1383f611870b669525_2809	40b06fe84ca1b8758d0c3f8a0dea34af_2283	20e8a30293b7b0c63abbc29d0c4c19ee_1066	6db8800965c51df47e711e72bf22185f_2061	0ed7320c6f511ce95f40560feeb5531a_2540	K_pneumoniae_6_01295
recQ		ATP-dependent DNA helicase RecQ	6	6	1	1	5178				1826	1826	1826	a177eae4552a0a1383f611870b669525_10016	40b06fe84ca1b8758d0c3f8a0dea34af_9488	20e8a30293b7b0c63abbc29d0c4c19ee_8952	6db8800965c51df47e711e72bf22185f_9084	0ed7320c6f511ce95f40560feeb5531a_9483	K_pneumoniae_6_04471
zraR		sigma-54-dependent response regulator transcription factor ZraR	6	6	1	1	4918				1331	1331	1331	a177eae4552a0a1383f611870b669525_9870	40b06fe84ca1b8758d0c3f8a0dea34af_9342	20e8a30293b7b0c63abbc29d0c4c19ee_10609	6db8800965c51df47e711e72bf22185f_10694	0ed7320c6f511ce95f40560feeb5531a_10646	K_pneumoniae_6_05098
WP_004179920.1		LysE family translocator	6	6	1	1	5536				620	620	620	a177eae4552a0a1383f611870b669525_5386	40b06fe84ca1b8758d0c3f8a0dea34af_4745	20e8a30293b7b0c63abbc29d0c4c19ee_2980	6db8800965c51df47e711e72bf22185f_2980	0ed7320c6f511ce95f40560feeb5531a_2946	K_pneumoniae_6_01868
artM		arginine ABC transporter permease ArtM	6	6	1	1	885				668	668	668	a177eae4552a0a1383f611870b669525_7080	40b06fe84ca1b8758d0c3f8a0dea34af_6550	20e8a30293b7b0c63abbc29d0c4c19ee_2301	6db8800965c51df47e711e72bf22185f_1409	0ed7320c6f511ce95f40560feeb5531a_1409	K_pneumoniae_6_00336
WP_072157830.1		ABC transporter substrate-binding protein	6	6	1	1	383				953	977	973	a177eae4552a0a1383f611870b669525_4585	40b06fe84ca1b8758d0c3f8a0dea34af_3977	20e8a30293b7b0c63abbc29d0c4c19ee_7708	6db8800965c51df47e711e72bf22185f_7968	0ed7320c6f511ce95f40560feeb5531a_6091	K_pneumoniae_6_03893
WP_004180955.1		type II toxin-antitoxin system RatA family toxin	6	6	1	1	2046				437	437	437	a177eae4552a0a1383f611870b669525_2386	40b06fe84ca1b8758d0c3f8a0dea34af_1770	20e8a30293b7b0c63abbc29d0c4c19ee_3171	6db8800965c51df47e711e72bf22185f_3782	0ed7320c6f511ce95f40560feeb5531a_4261	K_pneumoniae_6_02487
thiH		2-iminoacetate synthase ThiH	6	6	1	1	4933				1133	1133	1133	a177eae4552a0a1383f611870b669525_9901	40b06fe84ca1b8758d0c3f8a0dea34af_9373	20e8a30293b7b0c63abbc29d0c4c19ee_10640	6db8800965c51df47e711e72bf22185f_10725	0ed7320c6f511ce95f40560feeb5531a_10677	K_pneumoniae_6_05083
WP_002906792.1		NADP-dependent oxidoreductase	6	6	1	1	5719				1037	1037	1037	a177eae4552a0a1383f611870b669525_5019	40b06fe84ca1b8758d0c3f8a0dea34af_5112	20e8a30293b7b0c63abbc29d0c4c19ee_2612	6db8800965c51df47e711e72bf22185f_2612	0ed7320c6f511ce95f40560feeb5531a_3314	K_pneumoniae_6_02041
WP_004148751.1		YceI family protein	6	6	1	1	287				647	647	647	a177eae4552a0a1383f611870b669525_4391	40b06fe84ca1b8758d0c3f8a0dea34af_3783	20e8a30293b7b0c63abbc29d0c4c19ee_7902	6db8800965c51df47e711e72bf22185f_7774	0ed7320c6f511ce95f40560feeb5531a_6285	K_pneumoniae_6_03984
yccS		YccS family putative transporter	6	6	1	1	4243				2135	2135	2135	a177eae4552a0a1383f611870b669525_6898	40b06fe84ca1b8758d0c3f8a0dea34af_6368	20e8a30293b7b0c63abbc29d0c4c19ee_5424	6db8800965c51df47e711e72bf22185f_5448	0ed7320c6f511ce95f40560feeb5531a_5927	K_pneumoniae_6_00243
rfbB		O-antigen export ABC transporter ATP-binding protein RfbB	6	6	1	1	3675				740	740	740	a177eae4552a0a1383f611870b669525_3421	40b06fe84ca1b8758d0c3f8a0dea34af_2885	20e8a30293b7b0c63abbc29d0c4c19ee_452	6db8800965c51df47e711e72bf22185f_5592	0ed7320c6f511ce95f40560feeb5531a_1926	K_pneumoniae_6_01001
WP_002908223.1		heme ABC transporter permease	6	6	1	1	4009				737	737	737	a177eae4552a0a1383f611870b669525_4653	40b06fe84ca1b8758d0c3f8a0dea34af_5479	20e8a30293b7b0c63abbc29d0c4c19ee_10417	6db8800965c51df47e711e72bf22185f_10502	0ed7320c6f511ce95f40560feeb5531a_10488	K_pneumoniae_6_04992
WP_043906755.1		MoaD/ThiS family protein	6	6	1	1	2511				2477	2477	2477	a177eae4552a0a1383f611870b669525_3955	40b06fe84ca1b8758d0c3f8a0dea34af_3346	20e8a30293b7b0c63abbc29d0c4c19ee_5	6db8800965c51df47e711e72bf22185f_6039	0ed7320c6f511ce95f40560feeb5531a_1479	K_pneumoniae_6_00789
WP_002889616.1		LysR family transcriptional regulator	6	6	1	1	1556				905	905	905	a177eae4552a0a1383f611870b669525_8484	40b06fe84ca1b8758d0c3f8a0dea34af_7954	20e8a30293b7b0c63abbc29d0c4c19ee_5542	6db8800965c51df47e711e72bf22185f_5	0ed7320c6f511ce95f40560feeb5531a_5	K_pneumoniae_6_03057
WP_004178061.1		transcriptional regulator TraJ family protein	6	6	1	1	3109				695	695	695	a177eae4552a0a1383f611870b669525_10851	40b06fe84ca1b8758d0c3f8a0dea34af_10718	20e8a30293b7b0c63abbc29d0c4c19ee_11145	6db8800965c51df47e711e72bf22185f_9148	0ed7320c6f511ce95f40560feeb5531a_9748	K_pneumoniae_6_04661
WP_020325161.1		DUF1062 domain-containing protein	6	6	1	1	387				587	614	591	a177eae4552a0a1383f611870b669525_4595	40b06fe84ca1b8758d0c3f8a0dea34af_3987	20e8a30293b7b0c63abbc29d0c4c19ee_7698	6db8800965c51df47e711e72bf22185f_7978	0ed7320c6f511ce95f40560feeb5531a_6081	K_pneumoniae_6_03888
metN		methionine ABC transporter ATP-binding protein MetN	6	6	1	1	1559				1031	1031	1031	a177eae4552a0a1383f611870b669525_8508	40b06fe84ca1b8758d0c3f8a0dea34af_7978	20e8a30293b7b0c63abbc29d0c4c19ee_4473	6db8800965c51df47e711e72bf22185f_4496	0ed7320c6f511ce95f40560feeb5531a_4975	K_pneumoniae_6_02829
WP_004181634.1		AraC family transcriptional regulator	6	6	1	1	3018				986	986	986	a177eae4552a0a1383f611870b669525_10178	40b06fe84ca1b8758d0c3f8a0dea34af_9650	20e8a30293b7b0c63abbc29d0c4c19ee_8538	6db8800965c51df47e711e72bf22185f_8609	0ed7320c6f511ce95f40560feeb5531a_8952	K_pneumoniae_6_04430
tsaD		tRNA (adenosine(37)-N6)-threonylcarbamoyltransferase complex transferase subunit TsaD	6	6	1	1	3955				1013	1013	1013	a177eae4552a0a1383f611870b669525_1329	40b06fe84ca1b8758d0c3f8a0dea34af_708	20e8a30293b7b0c63abbc29d0c4c19ee_5991	6db8800965c51df47e711e72bf22185f_6051	0ed7320c6f511ce95f40560feeb5531a_6454	K_pneumoniae_6_05296
WP_002915225.1		MFS transporter	6	6	1	1	4399				1352	1352	1352	a177eae4552a0a1383f611870b669525_2034	40b06fe84ca1b8758d0c3f8a0dea34af_1418	20e8a30293b7b0c63abbc29d0c4c19ee_3525	6db8800965c51df47e711e72bf22185f_3430	0ed7320c6f511ce95f40560feeb5531a_3909	K_pneumoniae_6_02314
WP_004179804.1		MFS transporter	6	6	1	1	2691				1238	1238	1238	a177eae4552a0a1383f611870b669525_5570	40b06fe84ca1b8758d0c3f8a0dea34af_4559	20e8a30293b7b0c63abbc29d0c4c19ee_10175	6db8800965c51df47e711e72bf22185f_10228	0ed7320c6f511ce95f40560feeb5531a_8667	K_pneumoniae_6_03846
dnaN		DNA polymerase III subunit beta	6	6	1	1	4771				1100	1100	1100	a177eae4552a0a1383f611870b669525_5	40b06fe84ca1b8758d0c3f8a0dea34af_10128	20e8a30293b7b0c63abbc29d0c4c19ee_9788	6db8800965c51df47e711e72bf22185f_9873	0ed7320c6f511ce95f40560feeb5531a_10118	K_pneumoniae_6_01447
WP_004179554.1		hypothetical protein	6	6	1	1	5493				1232	1232	1232	a177eae4552a0a1383f611870b669525_6112	40b06fe84ca1b8758d0c3f8a0dea34af_5503	20e8a30293b7b0c63abbc29d0c4c19ee_6744	6db8800965c51df47e711e72bf22185f_6465	0ed7320c6f511ce95f40560feeb5531a_10874	K_pneumoniae_6_03061
murI		glutamate racemase	6	6	1	1	3005				851	851	851	a177eae4552a0a1383f611870b669525_10151	40b06fe84ca1b8758d0c3f8a0dea34af_9623	20e8a30293b7b0c63abbc29d0c4c19ee_8565	6db8800965c51df47e711e72bf22185f_8636	0ed7320c6f511ce95f40560feeb5531a_8925	K_pneumoniae_6_04443
WP_004174663.1		iron ABC transporter permease	6	6	1	1	1921				995	995	995	a177eae4552a0a1383f611870b669525_2120	40b06fe84ca1b8758d0c3f8a0dea34af_1504	20e8a30293b7b0c63abbc29d0c4c19ee_3439	6db8800965c51df47e711e72bf22185f_3516	0ed7320c6f511ce95f40560feeb5531a_3995	K_pneumoniae_6_02356
dnaK		molecular chaperone DnaK	6	6	1	1	1751				1916	1916	1916	a177eae4552a0a1383f611870b669525_8899	40b06fe84ca1b8758d0c3f8a0dea34af_8369	20e8a30293b7b0c63abbc29d0c4c19ee_4864	6db8800965c51df47e711e72bf22185f_4105	0ed7320c6f511ce95f40560feeb5531a_4584	K_pneumoniae_6_02640
WP_004180286.1		hypothetical protein	6	6	1	1	4017				812	1115	1014	a177eae4552a0a1383f611870b669525_4637	40b06fe84ca1b8758d0c3f8a0dea34af_5495	20e8a30293b7b0c63abbc29d0c4c19ee_10433	6db8800965c51df47e711e72bf22185f_10518	0ed7320c6f511ce95f40560feeb5531a_10472	K_pneumoniae_6_04984
xseA		exodeoxyribonuclease VII large subunit	6	6	1	1	733				1391	1391	1391	a177eae4552a0a1383f611870b669525_2701	40b06fe84ca1b8758d0c3f8a0dea34af_2175	20e8a30293b7b0c63abbc29d0c4c19ee_1174	6db8800965c51df47e711e72bf22185f_2169	0ed7320c6f511ce95f40560feeb5531a_2648	K_pneumoniae_6_01348
WP_004152853.1		ATP-binding cassette domain-containing protein	6	6	1	1	980				722	722	722	a177eae4552a0a1383f611870b669525_7271	40b06fe84ca1b8758d0c3f8a0dea34af_6741	20e8a30293b7b0c63abbc29d0c4c19ee_2110	6db8800965c51df47e711e72bf22185f_1218	0ed7320c6f511ce95f40560feeb5531a_1218	K_pneumoniae_6_00430
WP_004178459.1		Cu(+)/Ag(+) sensor histidine kinase	6	6	1	1	848				1433	1433	1433	a177eae4552a0a1383f611870b669525_9185	40b06fe84ca1b8758d0c3f8a0dea34af_8655	20e8a30293b7b0c63abbc29d0c4c19ee_10929	6db8800965c51df47e711e72bf22185f_11006	0ed7320c6f511ce95f40560feeb5531a_10978	K_pneumoniae_6_05205
WP_004180972.1		fimbrial biogenesis outer membrane usher protein	6	6	1	1	2023				2537	2537	2537	a177eae4552a0a1383f611870b669525_2337	40b06fe84ca1b8758d0c3f8a0dea34af_1721	20e8a30293b7b0c63abbc29d0c4c19ee_3220	6db8800965c51df47e711e72bf22185f_3733	0ed7320c6f511ce95f40560feeb5531a_4212	K_pneumoniae_6_02463
WP_004151651.1		ParB/RepB/Spo0J family partition protein	6	6	1	1	1123				626	626	626	a177eae4552a0a1383f611870b669525_7601	40b06fe84ca1b8758d0c3f8a0dea34af_7071	20e8a30293b7b0c63abbc29d0c4c19ee_1780	6db8800965c51df47e711e72bf22185f_888	0ed7320c6f511ce95f40560feeb5531a_888	K_pneumoniae_6_00586
WP_004181511.1		aromatic acid/H+ symport family MFS transporter	6	6	1	1	3946				1355	1355	1355	a177eae4552a0a1383f611870b669525_401	40b06fe84ca1b8758d0c3f8a0dea34af_10320	20e8a30293b7b0c63abbc29d0c4c19ee_8771	6db8800965c51df47e711e72bf22185f_8842	0ed7320c6f511ce95f40560feeb5531a_9419	K_pneumoniae_6_04532
tcyL		cystine ABC transporter permease	6	6	1	1	2338				668	668	668	a177eae4552a0a1383f611870b669525_3748	40b06fe84ca1b8758d0c3f8a0dea34af_3145	20e8a30293b7b0c63abbc29d0c4c19ee_206	6db8800965c51df47e711e72bf22185f_5838	0ed7320c6f511ce95f40560feeb5531a_1680	K_pneumoniae_6_00883
WP_043906742.1		DUF2213 domain-containing protein	6	6	1	1	2264				1355	1355	1355	a177eae4552a0a1383f611870b669525_3911	40b06fe84ca1b8758d0c3f8a0dea34af_3308	20e8a30293b7b0c63abbc29d0c4c19ee_43	6db8800965c51df47e711e72bf22185f_6001	0ed7320c6f511ce95f40560feeb5531a_1517	K_pneumoniae_6_00807
WP_002898585.1		FAD-binding oxidoreductase	6	6	1	1	4283				1280	1280	1280	a177eae4552a0a1383f611870b669525_6813	40b06fe84ca1b8758d0c3f8a0dea34af_6281	20e8a30293b7b0c63abbc29d0c4c19ee_5339	6db8800965c51df47e711e72bf22185f_5363	0ed7320c6f511ce95f40560feeb5531a_5842	K_pneumoniae_6_00202
hlyD		secretion protein HlyD	6	6	1	1	961				995	995	995	a177eae4552a0a1383f611870b669525_7230	40b06fe84ca1b8758d0c3f8a0dea34af_6700	20e8a30293b7b0c63abbc29d0c4c19ee_2151	6db8800965c51df47e711e72bf22185f_1259	0ed7320c6f511ce95f40560feeb5531a_1259	K_pneumoniae_6_00410
WP_020325166.1		cytochrome c-type biogenesis protein CcmH	6	6	1	1	4004				446	458	448	a177eae4552a0a1383f611870b669525_4663	40b06fe84ca1b8758d0c3f8a0dea34af_5469	20e8a30293b7b0c63abbc29d0c4c19ee_10407	6db8800965c51df47e711e72bf22185f_10492	0ed7320c6f511ce95f40560feeb5531a_10498	K_pneumoniae_6_04997
WP_004150782.1		YoaK family small membrane protein	6	6	1	1	5302				101	101	101	a177eae4552a0a1383f611870b669525_6489	40b06fe84ca1b8758d0c3f8a0dea34af_5960	20e8a30293b7b0c63abbc29d0c4c19ee_8671	6db8800965c51df47e711e72bf22185f_8742	0ed7320c6f511ce95f40560feeb5531a_9202	K_pneumoniae_6_00050
WP_004213161.1		hypothetical protein	6	6	1	1	755				602	602	602	a177eae4552a0a1383f611870b669525_2657	40b06fe84ca1b8758d0c3f8a0dea34af_2131	20e8a30293b7b0c63abbc29d0c4c19ee_1218	6db8800965c51df47e711e72bf22185f_2213	0ed7320c6f511ce95f40560feeb5531a_2692	K_pneumoniae_6_01369
eco		serine protease inhibitor ecotin	6	6	1	1	528				491	491	491	a177eae4552a0a1383f611870b669525_3135	40b06fe84ca1b8758d0c3f8a0dea34af_2609	20e8a30293b7b0c63abbc29d0c4c19ee_740	6db8800965c51df47e711e72bf22185f_1735	0ed7320c6f511ce95f40560feeb5531a_2214	K_pneumoniae_6_01140
WP_004179496.1		glyoxalase/bleomycin resistance/dioxygenase family protein	6	6	1	1	3268				386	386	386	a177eae4552a0a1383f611870b669525_6178	40b06fe84ca1b8758d0c3f8a0dea34af_5569	20e8a30293b7b0c63abbc29d0c4c19ee_6678	6db8800965c51df47e711e72bf22185f_6531	0ed7320c6f511ce95f40560feeb5531a_7473	K_pneumoniae_6_03093
creB		two-component system response regulator CreB	6	6	1	1	1770				689	689	689	a177eae4552a0a1383f611870b669525_8938	40b06fe84ca1b8758d0c3f8a0dea34af_8408	20e8a30293b7b0c63abbc29d0c4c19ee_4903	6db8800965c51df47e711e72bf22185f_4066	0ed7320c6f511ce95f40560feeb5531a_4545	K_pneumoniae_6_02623
bfd		bacterioferritin-associated ferredoxin	6	6	1	1	5169				194	194	194	a177eae4552a0a1383f611870b669525_826	40b06fe84ca1b8758d0c3f8a0dea34af_205	20e8a30293b7b0c63abbc29d0c4c19ee_10735	6db8800965c51df47e711e72bf22185f_10820	0ed7320c6f511ce95f40560feeb5531a_10772	K_pneumoniae_6_05135
WP_004143611.1		small membrane protein	6	6	1	1	3771				122	122	122	a177eae4552a0a1383f611870b669525_5732	40b06fe84ca1b8758d0c3f8a0dea34af_4397	20e8a30293b7b0c63abbc29d0c4c19ee_10255	6db8800965c51df47e711e72bf22185f_10340	0ed7320c6f511ce95f40560feeb5531a_8505	K_pneumoniae_6_03768
urtE		urea ABC transporter ATP-binding subunit UrtE	6	6	1	1	3738				698	698	698	a177eae4552a0a1383f611870b669525_5668	40b06fe84ca1b8758d0c3f8a0dea34af_4461	20e8a30293b7b0c63abbc29d0c4c19ee_10319	6db8800965c51df47e711e72bf22185f_10404	0ed7320c6f511ce95f40560feeb5531a_8569	K_pneumoniae_6_03798
WP_004177826.1		YjcB family protein	6	6	1	1	140				281	281	281	a177eae4552a0a1383f611870b669525_9728	40b06fe84ca1b8758d0c3f8a0dea34af_9198	20e8a30293b7b0c63abbc29d0c4c19ee_3964	6db8800965c51df47e711e72bf22185f_5005	0ed7320c6f511ce95f40560feeb5531a_5104	K_pneumoniae_6_01743
bcsQ		cellulose biosynthesis protein BcsQ	6	6	1	1	3384				731	731	731	a177eae4552a0a1383f611870b669525_468	40b06fe84ca1b8758d0c3f8a0dea34af_10387	20e8a30293b7b0c63abbc29d0c4c19ee_8838	6db8800965c51df47e711e72bf22185f_8909	0ed7320c6f511ce95f40560feeb5531a_9352	K_pneumoniae_6_04565
glmM		phosphoglucosamine mutase	6	6	1	1	5033				1337	1337	1337	a177eae4552a0a1383f611870b669525_1113	40b06fe84ca1b8758d0c3f8a0dea34af_492	20e8a30293b7b0c63abbc29d0c4c19ee_6207	6db8800965c51df47e711e72bf22185f_6267	0ed7320c6f511ce95f40560feeb5531a_6670	K_pneumoniae_6_03489
sapB		putrescine ABC transporter permease SapB	6	6	1	1	3246				965	965	965	a177eae4552a0a1383f611870b669525_6224	40b06fe84ca1b8758d0c3f8a0dea34af_5615	20e8a30293b7b0c63abbc29d0c4c19ee_6632	6db8800965c51df47e711e72bf22185f_6577	0ed7320c6f511ce95f40560feeb5531a_7427	K_pneumoniae_6_03115
rhaT		L-rhamnose/proton symporter RhaT	6	6	1	1	3045				1034	1034	1034	a177eae4552a0a1383f611870b669525_10232	40b06fe84ca1b8758d0c3f8a0dea34af_9704	20e8a30293b7b0c63abbc29d0c4c19ee_8484	6db8800965c51df47e711e72bf22185f_8555	0ed7320c6f511ce95f40560feeb5531a_9006	K_pneumoniae_6_04403
WP_043906908.1		PTS lactose/cellobiose transporter subunit IIA	6	6	1	1	1936				314	314	314	a177eae4552a0a1383f611870b669525_2150	40b06fe84ca1b8758d0c3f8a0dea34af_1534	20e8a30293b7b0c63abbc29d0c4c19ee_3409	6db8800965c51df47e711e72bf22185f_3546	0ed7320c6f511ce95f40560feeb5531a_4025	K_pneumoniae_6_02371
WP_004145100.1		NCS2 family permease	6	6	1	1	4761				1337	1337	1337	a177eae4552a0a1383f611870b669525_10438	40b06fe84ca1b8758d0c3f8a0dea34af_10152	20e8a30293b7b0c63abbc29d0c4c19ee_9812	6db8800965c51df47e711e72bf22185f_9897	0ed7320c6f511ce95f40560feeb5531a_10094	K_pneumoniae_6_01437
WP_004178891.1		sugar phosphate isomerase/epimerase	6	6	1	1	1230				1022	1022	1022	a177eae4552a0a1383f611870b669525_7815	40b06fe84ca1b8758d0c3f8a0dea34af_7285	20e8a30293b7b0c63abbc29d0c4c19ee_1566	6db8800965c51df47e711e72bf22185f_674	0ed7320c6f511ce95f40560feeb5531a_674	K_pneumoniae_6_00693
WP_004178748.1		hypothetical protein	6	6	1	1	1386				332	332	332	a177eae4552a0a1383f611870b669525_8138	40b06fe84ca1b8758d0c3f8a0dea34af_7608	20e8a30293b7b0c63abbc29d0c4c19ee_5888	6db8800965c51df47e711e72bf22185f_351	0ed7320c6f511ce95f40560feeb5531a_351	K_pneumoniae_6_02887
WP_004178950.1		FGGY-family carbohydrate kinase	6	6	1	1	1179				1499	1499	1499	a177eae4552a0a1383f611870b669525_7713	40b06fe84ca1b8758d0c3f8a0dea34af_7183	20e8a30293b7b0c63abbc29d0c4c19ee_1668	6db8800965c51df47e711e72bf22185f_776	0ed7320c6f511ce95f40560feeb5531a_776	K_pneumoniae_6_00642
emrB		multidrug efflux MFS transporter permease subunit EmrB	6	6	1	1	1992				1538	1538	1538	a177eae4552a0a1383f611870b669525_2275	40b06fe84ca1b8758d0c3f8a0dea34af_1659	20e8a30293b7b0c63abbc29d0c4c19ee_3282	6db8800965c51df47e711e72bf22185f_3671	0ed7320c6f511ce95f40560feeb5531a_4150	K_pneumoniae_6_02432
trmA		tRNA (uridine(54)-C5)-methyltransferase TrmA	6	6	1	1	3007				1100	1100	1100	a177eae4552a0a1383f611870b669525_10156	40b06fe84ca1b8758d0c3f8a0dea34af_9628	20e8a30293b7b0c63abbc29d0c4c19ee_8560	6db8800965c51df47e711e72bf22185f_8631	0ed7320c6f511ce95f40560feeb5531a_8930	K_pneumoniae_6_04441
asr		acid resistance repetitive basic protein Asr	6	6	1	1	5814				218	236	221	a177eae4552a0a1383f611870b669525_4827	40b06fe84ca1b8758d0c3f8a0dea34af_5304	20e8a30293b7b0c63abbc29d0c4c19ee_2420	6db8800965c51df47e711e72bf22185f_2420	0ed7320c6f511ce95f40560feeb5531a_3506	K_pneumoniae_6_02133
WP_004198570.1		hypothetical protein	6	6	1	1	2538				230	230	230	a177eae4552a0a1383f611870b669525_10901	40b06fe84ca1b8758d0c3f8a0dea34af_10868	20e8a30293b7b0c63abbc29d0c4c19ee_11027	6db8800965c51df47e711e72bf22185f_11058	0ed7320c6f511ce95f40560feeb5531a_11058	K_pneumoniae_6_05324
tdcB		bifunctional threonine ammonia-lyase/L-serine ammonia-lyase TdcB	6	6	1	1	4715				989	989	989	a177eae4552a0a1383f611870b669525_4163	40b06fe84ca1b8758d0c3f8a0dea34af_3558	20e8a30293b7b0c63abbc29d0c4c19ee_9175	6db8800965c51df47e711e72bf22185f_9354	0ed7320c6f511ce95f40560feeb5531a_7840	K_pneumoniae_6_03306
WP_004147553.1		sugar kinase	6	6	1	1	1132				941	941	941	a177eae4552a0a1383f611870b669525_7619	40b06fe84ca1b8758d0c3f8a0dea34af_7089	20e8a30293b7b0c63abbc29d0c4c19ee_1762	6db8800965c51df47e711e72bf22185f_870	0ed7320c6f511ce95f40560feeb5531a_870	K_pneumoniae_6_00595
nlpE		envelope stress response activation lipoprotein NlpE	6	6	1	1	1566				698	698	698	a177eae4552a0a1383f611870b669525_8522	40b06fe84ca1b8758d0c3f8a0dea34af_7992	20e8a30293b7b0c63abbc29d0c4c19ee_4487	6db8800965c51df47e711e72bf22185f_4482	0ed7320c6f511ce95f40560feeb5531a_4961	K_pneumoniae_6_02822
WP_043906915.1		hypothetical protein	6	6	1	1	2095				338	338	338	a177eae4552a0a1383f611870b669525_2497	40b06fe84ca1b8758d0c3f8a0dea34af_1881	20e8a30293b7b0c63abbc29d0c4c19ee_9878	6db8800965c51df47e711e72bf22185f_9963	0ed7320c6f511ce95f40560feeb5531a_10261	K_pneumoniae_6_04896
WP_004180094.1		ring-hydroxylating dioxygenase ferredoxin reductase family protein	6	6	1	1	5675				1016	1016	1016	a177eae4552a0a1383f611870b669525_5105	40b06fe84ca1b8758d0c3f8a0dea34af_5026	20e8a30293b7b0c63abbc29d0c4c19ee_2698	6db8800965c51df47e711e72bf22185f_2698	0ed7320c6f511ce95f40560feeb5531a_3228	K_pneumoniae_6_01998
hmsP		biofilm formation regulator HmsP	6	6	1	1	3389				2006	2006	2006	a177eae4552a0a1383f611870b669525_478	40b06fe84ca1b8758d0c3f8a0dea34af_10397	20e8a30293b7b0c63abbc29d0c4c19ee_8848	6db8800965c51df47e711e72bf22185f_8919	0ed7320c6f511ce95f40560feeb5531a_9342	K_pneumoniae_6_04570
kdgR		DNA-binding transcriptional regulator KdgR	6	6	1	1	260				791	791	791	a177eae4552a0a1383f611870b669525_4053	40b06fe84ca1b8758d0c3f8a0dea34af_3444	20e8a30293b7b0c63abbc29d0c4c19ee_10439	6db8800965c51df47e711e72bf22185f_10606	0ed7320c6f511ce95f40560feeb5531a_7950	K_pneumoniae_6_03356
group_1668	leuA	2-isopropylmalate synthase	6	6	1	1	1695				1571	1571	1571	a177eae4552a0a1383f611870b669525_8786	40b06fe84ca1b8758d0c3f8a0dea34af_8256	20e8a30293b7b0c63abbc29d0c4c19ee_4751	6db8800965c51df47e711e72bf22185f_4218	0ed7320c6f511ce95f40560feeb5531a_4697	K_pneumoniae_6_02696
cysP		thiosulfate/sulfate ABC transporter substrate-binding protein CysP	6	6	1	1	669				1016	1016	1016	a177eae4552a0a1383f611870b669525_2833	40b06fe84ca1b8758d0c3f8a0dea34af_2307	20e8a30293b7b0c63abbc29d0c4c19ee_1042	6db8800965c51df47e711e72bf22185f_2037	0ed7320c6f511ce95f40560feeb5531a_2516	K_pneumoniae_6_01284
slyA		transcriptional regulator SlyA	6	6	1	1	5791				428	440	437	a177eae4552a0a1383f611870b669525_4873	40b06fe84ca1b8758d0c3f8a0dea34af_5258	20e8a30293b7b0c63abbc29d0c4c19ee_2466	6db8800965c51df47e711e72bf22185f_2466	0ed7320c6f511ce95f40560feeb5531a_3460	K_pneumoniae_6_02110
nudF		ADP-ribose diphosphatase	6	6	1	1	3838				632	632	632	a177eae4552a0a1383f611870b669525_1388	40b06fe84ca1b8758d0c3f8a0dea34af_767	20e8a30293b7b0c63abbc29d0c4c19ee_10686	6db8800965c51df47e711e72bf22185f_10798	0ed7320c6f511ce95f40560feeb5531a_10723	K_pneumoniae_6_05112
mtr		tryptophan permease	6	6	1	1	5018				1244	1244	1244	a177eae4552a0a1383f611870b669525_1151	40b06fe84ca1b8758d0c3f8a0dea34af_530	20e8a30293b7b0c63abbc29d0c4c19ee_6169	6db8800965c51df47e711e72bf22185f_6229	0ed7320c6f511ce95f40560feeb5531a_6632	K_pneumoniae_6_03506
group_1672	hcp	type VI secretion system effector Hcp	6	6	1	1	5489				491	491	491	a177eae4552a0a1383f611870b669525_6118	40b06fe84ca1b8758d0c3f8a0dea34af_5509	20e8a30293b7b0c63abbc29d0c4c19ee_6738	6db8800965c51df47e711e72bf22185f_6471	0ed7320c6f511ce95f40560feeb5531a_10880	K_pneumoniae_6_03064
WP_043906864.1		TIM barrel protein	6	6	1	1	5890				821	821	821	a177eae4552a0a1383f611870b669525_9304	40b06fe84ca1b8758d0c3f8a0dea34af_8774	20e8a30293b7b0c63abbc29d0c4c19ee_4388	6db8800965c51df47e711e72bf22185f_4581	0ed7320c6f511ce95f40560feeb5531a_5528	K_pneumoniae_6_01540
rpsR		30S ribosomal protein S18	6	6	1	1	5969				227	227	227	a177eae4552a0a1383f611870b669525_9454	40b06fe84ca1b8758d0c3f8a0dea34af_8924	20e8a30293b7b0c63abbc29d0c4c19ee_4238	6db8800965c51df47e711e72bf22185f_4731	0ed7320c6f511ce95f40560feeb5531a_5378	K_pneumoniae_6_01611
tpx		thiol peroxidase	6	6	1	1	3264				506	506	506	a177eae4552a0a1383f611870b669525_6188	40b06fe84ca1b8758d0c3f8a0dea34af_5579	20e8a30293b7b0c63abbc29d0c4c19ee_6668	6db8800965c51df47e711e72bf22185f_6541	0ed7320c6f511ce95f40560feeb5531a_7463	K_pneumoniae_6_03097
WP_004178746.1		FAD-dependent oxidoreductase	6	6	1	1	1389				1676	1676	1676	a177eae4552a0a1383f611870b669525_8144	40b06fe84ca1b8758d0c3f8a0dea34af_7614	20e8a30293b7b0c63abbc29d0c4c19ee_5882	6db8800965c51df47e711e72bf22185f_345	0ed7320c6f511ce95f40560feeb5531a_345	K_pneumoniae_6_02890
trmH		tRNA (guanosine(18)-2'-O)-methyltransferase TrmH	6	6	1	1	4835				689	689	689	a177eae4552a0a1383f611870b669525_229	40b06fe84ca1b8758d0c3f8a0dea34af_9904	20e8a30293b7b0c63abbc29d0c4c19ee_7498	6db8800965c51df47e711e72bf22185f_7599	0ed7320c6f511ce95f40560feeb5531a_7622	K_pneumoniae_6_03642
minD		septum site-determining protein MinD	6	6	1	1	4687				812	812	812	a177eae4552a0a1383f611870b669525_4105	40b06fe84ca1b8758d0c3f8a0dea34af_3500	20e8a30293b7b0c63abbc29d0c4c19ee_9117	6db8800965c51df47e711e72bf22185f_9412	0ed7320c6f511ce95f40560feeb5531a_7898	K_pneumoniae_6_03331
WP_002917917.1		phage holin family protein	6	6	1	1	4986				398	398	398	a177eae4552a0a1383f611870b669525_1214	40b06fe84ca1b8758d0c3f8a0dea34af_593	20e8a30293b7b0c63abbc29d0c4c19ee_6106	6db8800965c51df47e711e72bf22185f_6166	0ed7320c6f511ce95f40560feeb5531a_6569	K_pneumoniae_6_03538
mliC		C-type lysozyme inhibitor	6	6	1	1	5788				323	359	329	a177eae4552a0a1383f611870b669525_4881	40b06fe84ca1b8758d0c3f8a0dea34af_5250	20e8a30293b7b0c63abbc29d0c4c19ee_2474	6db8800965c51df47e711e72bf22185f_2474	0ed7320c6f511ce95f40560feeb5531a_3452	K_pneumoniae_6_02106
gltS		sodium/glutamate symporter	6	6	1	1	4848				1202	1202	1202	a177eae4552a0a1383f611870b669525_203	40b06fe84ca1b8758d0c3f8a0dea34af_9930	20e8a30293b7b0c63abbc29d0c4c19ee_7472	6db8800965c51df47e711e72bf22185f_7625	0ed7320c6f511ce95f40560feeb5531a_7596	K_pneumoniae_6_03629
WP_004178751.1		SgrR family transcriptional regulator	6	6	1	1	1368				1700	1700	1700	a177eae4552a0a1383f611870b669525_8102	40b06fe84ca1b8758d0c3f8a0dea34af_7572	20e8a30293b7b0c63abbc29d0c4c19ee_5924	6db8800965c51df47e711e72bf22185f_387	0ed7320c6f511ce95f40560feeb5531a_387	K_pneumoniae_6_02869
efp		elongation factor P	6	6	1	1	56				566	566	566	a177eae4552a0a1383f611870b669525_9559	40b06fe84ca1b8758d0c3f8a0dea34af_9029	20e8a30293b7b0c63abbc29d0c4c19ee_4133	6db8800965c51df47e711e72bf22185f_4836	0ed7320c6f511ce95f40560feeb5531a_5273	K_pneumoniae_6_01662
WP_002885665.1		adenylosuccinate synthase	6	6	1	1	5949				1298	1298	1298	a177eae4552a0a1383f611870b669525_9494	40b06fe84ca1b8758d0c3f8a0dea34af_8964	20e8a30293b7b0c63abbc29d0c4c19ee_4198	6db8800965c51df47e711e72bf22185f_4771	0ed7320c6f511ce95f40560feeb5531a_5338	K_pneumoniae_6_01631
ppnP		pyrimidine/purine nucleoside phosphorylase	6	6	1	1	1442				284	284	284	a177eae4552a0a1383f611870b669525_8250	40b06fe84ca1b8758d0c3f8a0dea34af_7720	20e8a30293b7b0c63abbc29d0c4c19ee_5776	6db8800965c51df47e711e72bf22185f_239	0ed7320c6f511ce95f40560feeb5531a_239	K_pneumoniae_6_02942
WP_004181403.1		glutathione S-transferase family protein	6	6	1	1	4989				986	986	986	a177eae4552a0a1383f611870b669525_1208	40b06fe84ca1b8758d0c3f8a0dea34af_587	20e8a30293b7b0c63abbc29d0c4c19ee_6112	6db8800965c51df47e711e72bf22185f_6172	0ed7320c6f511ce95f40560feeb5531a_6575	K_pneumoniae_6_03535
hsdR		type I restriction-modification system endonuclease	6	6	1	1	5872				3512	3512	3512	a177eae4552a0a1383f611870b669525_9265	40b06fe84ca1b8758d0c3f8a0dea34af_8735	20e8a30293b7b0c63abbc29d0c4c19ee_4427	6db8800965c51df47e711e72bf22185f_4542	0ed7320c6f511ce95f40560feeb5531a_5567	K_pneumoniae_6_01521
astA		arginine N-succinyltransferase	6	6	1	1	2199				1034	1034	1034	a177eae4552a0a1383f611870b669525_6381	40b06fe84ca1b8758d0c3f8a0dea34af_5772	20e8a30293b7b0c63abbc29d0c4c19ee_6475	6db8800965c51df47e711e72bf22185f_6734	0ed7320c6f511ce95f40560feeb5531a_7270	K_pneumoniae_6_03190
WP_002889868.1		phospho-2-dehydro-3-deoxyheptonate aldolase	6	6	1	1	1512				791	791	791	a177eae4552a0a1383f611870b669525_8393	40b06fe84ca1b8758d0c3f8a0dea34af_7863	20e8a30293b7b0c63abbc29d0c4c19ee_5633	6db8800965c51df47e711e72bf22185f_96	0ed7320c6f511ce95f40560feeb5531a_96	K_pneumoniae_6_03011
plsB		glycerol-3-phosphate 1-O-acyltransferase PlsB	6	6	1	1	172				2423	2423	2423	a177eae4552a0a1383f611870b669525_9794	40b06fe84ca1b8758d0c3f8a0dea34af_9264	20e8a30293b7b0c63abbc29d0c4c19ee_3898	6db8800965c51df47e711e72bf22185f_5071	0ed7320c6f511ce95f40560feeb5531a_5038	K_pneumoniae_6_01774
WP_031280736.1		MFS transporter	6	6	1	1	5768				1154	1217	1164	a177eae4552a0a1383f611870b669525_4919	40b06fe84ca1b8758d0c3f8a0dea34af_5212	20e8a30293b7b0c63abbc29d0c4c19ee_2512	6db8800965c51df47e711e72bf22185f_2512	0ed7320c6f511ce95f40560feeb5531a_3414	K_pneumoniae_6_02087
WP_004180252.1		3-hydroxyacyl-CoA dehydrogenase family protein	6	6	1	1	3993				923	923	923	a177eae4552a0a1383f611870b669525_4683	40b06fe84ca1b8758d0c3f8a0dea34af_5449	20e8a30293b7b0c63abbc29d0c4c19ee_10387	6db8800965c51df47e711e72bf22185f_10472	0ed7320c6f511ce95f40560feeb5531a_10518	K_pneumoniae_6_05008
WP_004180396.1		PAAR domain-containing protein	6	6	1	1	4678				266	266	266	a177eae4552a0a1383f611870b669525_4235	40b06fe84ca1b8758d0c3f8a0dea34af_3630	20e8a30293b7b0c63abbc29d0c4c19ee_10091	6db8800965c51df47e711e72bf22185f_10087	0ed7320c6f511ce95f40560feeb5531a_6438	K_pneumoniae_6_03275
WP_004179665.1		DUF1304 domain-containing protein	6	6	1	1	4110				353	353	353	a177eae4552a0a1383f611870b669525_5912	40b06fe84ca1b8758d0c3f8a0dea34af_4217	20e8a30293b7b0c63abbc29d0c4c19ee_6898	6db8800965c51df47e711e72bf22185f_7002	0ed7320c6f511ce95f40560feeb5531a_7002	K_pneumoniae_6_04095
thiP		thiamine/thiamine pyrophosphate ABC transporter permease ThiP	6	6	1	1	1710				1610	1610	1610	a177eae4552a0a1383f611870b669525_8815	40b06fe84ca1b8758d0c3f8a0dea34af_8285	20e8a30293b7b0c63abbc29d0c4c19ee_4780	6db8800965c51df47e711e72bf22185f_4189	0ed7320c6f511ce95f40560feeb5531a_4668	K_pneumoniae_6_02681
WP_000857358.1		type IV secretion system protein	6	6	1	1	2816				707	707	707	a177eae4552a0a1383f611870b669525_3596	40b06fe84ca1b8758d0c3f8a0dea34af_3026	20e8a30293b7b0c63abbc29d0c4c19ee_325	6db8800965c51df47e711e72bf22185f_5719	0ed7320c6f511ce95f40560feeb5531a_1799	K_pneumoniae_6_00939
WP_002890108.1		hypothetical protein	6	6	1	1	1480				170	170	170	a177eae4552a0a1383f611870b669525_8326	40b06fe84ca1b8758d0c3f8a0dea34af_7796	20e8a30293b7b0c63abbc29d0c4c19ee_5700	6db8800965c51df47e711e72bf22185f_163	0ed7320c6f511ce95f40560feeb5531a_163	K_pneumoniae_6_02978
WP_002908202.1		3-hydroxybutyrate dehydrogenase	6	6	1	1	3995				770	770	770	a177eae4552a0a1383f611870b669525_4679	40b06fe84ca1b8758d0c3f8a0dea34af_5453	20e8a30293b7b0c63abbc29d0c4c19ee_10391	6db8800965c51df47e711e72bf22185f_10476	0ed7320c6f511ce95f40560feeb5531a_10514	K_pneumoniae_6_05006
trpB		tryptophan synthase subunit beta	6	6	1	1	3207				1193	1193	1193	a177eae4552a0a1383f611870b669525_6303	40b06fe84ca1b8758d0c3f8a0dea34af_5694	20e8a30293b7b0c63abbc29d0c4c19ee_6553	6db8800965c51df47e711e72bf22185f_6656	0ed7320c6f511ce95f40560feeb5531a_7348	K_pneumoniae_6_03152
rfaC		lipopolysaccharide heptosyltransferase RfaC	6	6	1	1	211				971	971	971	a177eae4552a0a1383f611870b669525_301	40b06fe84ca1b8758d0c3f8a0dea34af_10220	20e8a30293b7b0c63abbc29d0c4c19ee_7570	6db8800965c51df47e711e72bf22185f_7527	0ed7320c6f511ce95f40560feeb5531a_7694	K_pneumoniae_6_03677
WP_004179886.1		sigma-54 dependent transcriptional regulator	6	6	1	1	5515				1250	1250	1250	a177eae4552a0a1383f611870b669525_5428	40b06fe84ca1b8758d0c3f8a0dea34af_4703	20e8a30293b7b0c63abbc29d0c4c19ee_3022	6db8800965c51df47e711e72bf22185f_3022	0ed7320c6f511ce95f40560feeb5531a_2904	K_pneumoniae_6_01847
WP_223174638.1		GNAT family N-acetyltransferase	6	11	1.84	1	5655				89	953	297	a177eae4552a0a1383f611870b669525_5143 a177eae4552a0a1383f611870b669525_5147	40b06fe84ca1b8758d0c3f8a0dea34af_4988 40b06fe84ca1b8758d0c3f8a0dea34af_4984	20e8a30293b7b0c63abbc29d0c4c19ee_2736 20e8a30293b7b0c63abbc29d0c4c19ee_2740	6db8800965c51df47e711e72bf22185f_2736 6db8800965c51df47e711e72bf22185f_2740	0ed7320c6f511ce95f40560feeb5531a_3190 0ed7320c6f511ce95f40560feeb5531a_3186	K_pneumoniae_6_01979
WP_004143807.1		helix-turn-helix transcriptional regulator	6	6	1	1	5767				383	464	423	a177eae4552a0a1383f611870b669525_4921	40b06fe84ca1b8758d0c3f8a0dea34af_5210	20e8a30293b7b0c63abbc29d0c4c19ee_2514	6db8800965c51df47e711e72bf22185f_2514	0ed7320c6f511ce95f40560feeb5531a_3412	K_pneumoniae_6_02086
kefF		glutathione-regulated potassium-efflux system oxidoreductase KefF	6	6	1	1	1733				533	533	533	a177eae4552a0a1383f611870b669525_8861	40b06fe84ca1b8758d0c3f8a0dea34af_8331	20e8a30293b7b0c63abbc29d0c4c19ee_4826	6db8800965c51df47e711e72bf22185f_4143	0ed7320c6f511ce95f40560feeb5531a_4622	K_pneumoniae_6_02658
mnmE		tRNA uridine-5-carboxymethylaminomethyl(34) synthesis GTPase MnmE	6	6	1	1	4767				1364	1364	1364	a177eae4552a0a1383f611870b669525_10450	40b06fe84ca1b8758d0c3f8a0dea34af_10140	20e8a30293b7b0c63abbc29d0c4c19ee_9800	6db8800965c51df47e711e72bf22185f_9885	0ed7320c6f511ce95f40560feeb5531a_10106	K_pneumoniae_6_01443
nuoH		NADH-quinone oxidoreductase subunit NuoH	6	6	1	1	571				977	977	977	a177eae4552a0a1383f611870b669525_3047	40b06fe84ca1b8758d0c3f8a0dea34af_2521	20e8a30293b7b0c63abbc29d0c4c19ee_828	6db8800965c51df47e711e72bf22185f_1823	0ed7320c6f511ce95f40560feeb5531a_2302	K_pneumoniae_6_01185
glrR		two-component system response regulator GlrR	6	6	1	1	797				1337	1337	1337	a177eae4552a0a1383f611870b669525_2573	40b06fe84ca1b8758d0c3f8a0dea34af_2043	20e8a30293b7b0c63abbc29d0c4c19ee_1302	6db8800965c51df47e711e72bf22185f_2297	0ed7320c6f511ce95f40560feeb5531a_2776	K_pneumoniae_6_01410
WP_004140511.1		cytochrome ubiquinol oxidase subunit I	6	6	1	1	5286				1406	1406	1406	a177eae4552a0a1383f611870b669525_6521	40b06fe84ca1b8758d0c3f8a0dea34af_5992	20e8a30293b7b0c63abbc29d0c4c19ee_8703	6db8800965c51df47e711e72bf22185f_8774	0ed7320c6f511ce95f40560feeb5531a_9234	K_pneumoniae_6_00064
bcsF		cellulose biosynthesis protein BcsF	6	6	1	1	3381				197	197	197	a177eae4552a0a1383f611870b669525_462	40b06fe84ca1b8758d0c3f8a0dea34af_10381	20e8a30293b7b0c63abbc29d0c4c19ee_8832	6db8800965c51df47e711e72bf22185f_8903	0ed7320c6f511ce95f40560feeb5531a_9358	K_pneumoniae_6_04562
WP_004176159.1		substrate-binding domain-containing protein	6	6	1	1	5524				953	953	953	a177eae4552a0a1383f611870b669525_5410	40b06fe84ca1b8758d0c3f8a0dea34af_4721	20e8a30293b7b0c63abbc29d0c4c19ee_3004	6db8800965c51df47e711e72bf22185f_3004	0ed7320c6f511ce95f40560feeb5531a_2922	K_pneumoniae_6_01856
WP_002907473.1		XRE family transcriptional regulator	6	6	1	1	5745				569	569	569	a177eae4552a0a1383f611870b669525_4965	40b06fe84ca1b8758d0c3f8a0dea34af_5166	20e8a30293b7b0c63abbc29d0c4c19ee_2558	6db8800965c51df47e711e72bf22185f_2558	0ed7320c6f511ce95f40560feeb5531a_3368	K_pneumoniae_6_02064
WP_009310009.1		M48 family metallopeptidase	6	6	1	1	3150				755	755	755	a177eae4552a0a1383f611870b669525_10764	40b06fe84ca1b8758d0c3f8a0dea34af_10804	20e8a30293b7b0c63abbc29d0c4c19ee_9311	6db8800965c51df47e711e72bf22185f_9234	0ed7320c6f511ce95f40560feeb5531a_9662	K_pneumoniae_6_04621
zntA		Zn(II)/Cd(II)/Pb(II) translocating P-type ATPase ZntA	6	6	1	1	3448				2210	2210	2210	a177eae4552a0a1383f611870b669525_602	40b06fe84ca1b8758d0c3f8a0dea34af_10521	20e8a30293b7b0c63abbc29d0c4c19ee_7306	6db8800965c51df47e711e72bf22185f_7217	0ed7320c6f511ce95f40560feeb5531a_10401	K_pneumoniae_6_04950
WP_004196039.1		glucan biosynthesis protein	6	6	1	1	5754				1655	1844	1686	a177eae4552a0a1383f611870b669525_4947	40b06fe84ca1b8758d0c3f8a0dea34af_5184	20e8a30293b7b0c63abbc29d0c4c19ee_2540	6db8800965c51df47e711e72bf22185f_2540	0ed7320c6f511ce95f40560feeb5531a_3386	K_pneumoniae_6_02073
aphA		acid phosphatase AphA	6	6	1	1	159				713	713	713	a177eae4552a0a1383f611870b669525_9766	40b06fe84ca1b8758d0c3f8a0dea34af_9236	20e8a30293b7b0c63abbc29d0c4c19ee_3926	6db8800965c51df47e711e72bf22185f_5043	0ed7320c6f511ce95f40560feeb5531a_5066	K_pneumoniae_6_01761
WP_002913221.1		DedA family protein	6	6	1	1	607				659	659	659	a177eae4552a0a1383f611870b669525_2975	40b06fe84ca1b8758d0c3f8a0dea34af_2449	20e8a30293b7b0c63abbc29d0c4c19ee_900	6db8800965c51df47e711e72bf22185f_1895	0ed7320c6f511ce95f40560feeb5531a_2374	K_pneumoniae_6_01219
WP_002917920.1		DoxX family protein	6	6	1	1	4988				392	392	392	a177eae4552a0a1383f611870b669525_1210	40b06fe84ca1b8758d0c3f8a0dea34af_589	20e8a30293b7b0c63abbc29d0c4c19ee_6110	6db8800965c51df47e711e72bf22185f_6170	0ed7320c6f511ce95f40560feeb5531a_6573	K_pneumoniae_6_03536
tehB		tellurite resistance methyltransferase TehB	6	6	1	1	5750				596	596	596	a177eae4552a0a1383f611870b669525_4955	40b06fe84ca1b8758d0c3f8a0dea34af_5176	20e8a30293b7b0c63abbc29d0c4c19ee_2548	6db8800965c51df47e711e72bf22185f_2548	0ed7320c6f511ce95f40560feeb5531a_3378	K_pneumoniae_6_02069
argH		argininosuccinate lyase	6	6	1	1	3012				1373	1373	1373	a177eae4552a0a1383f611870b669525_10166	40b06fe84ca1b8758d0c3f8a0dea34af_9638	20e8a30293b7b0c63abbc29d0c4c19ee_8550	6db8800965c51df47e711e72bf22185f_8621	0ed7320c6f511ce95f40560feeb5531a_8940	K_pneumoniae_6_04436
WP_004181237.1		thioredoxin domain-containing protein	6	6	1	1	4608				611	611	611	a177eae4552a0a1383f611870b669525_1602	40b06fe84ca1b8758d0c3f8a0dea34af_986	20e8a30293b7b0c63abbc29d0c4c19ee_9420	6db8800965c51df47e711e72bf22185f_9505	0ed7320c6f511ce95f40560feeb5531a_9803	K_pneumoniae_6_04688
WP_004176135.1		PTS ascorbate transporter subunit IIC	6	6	1	1	5541				1262	1262	1262	a177eae4552a0a1383f611870b669525_5376	40b06fe84ca1b8758d0c3f8a0dea34af_4755	20e8a30293b7b0c63abbc29d0c4c19ee_2970	6db8800965c51df47e711e72bf22185f_2970	0ed7320c6f511ce95f40560feeb5531a_2956	K_pneumoniae_6_01873
WP_004180868.1		Rpn family recombination-promoting nuclease/putative transposase	6	6	1	1	715				923	923	923	a177eae4552a0a1383f611870b669525_2737	40b06fe84ca1b8758d0c3f8a0dea34af_2211	20e8a30293b7b0c63abbc29d0c4c19ee_1138	6db8800965c51df47e711e72bf22185f_2133	0ed7320c6f511ce95f40560feeb5531a_2612	K_pneumoniae_6_01329
WP_004147437.1		carbohydrate porin	6	6	1	1	1263				1517	1517	1517	a177eae4552a0a1383f611870b669525_7881	40b06fe84ca1b8758d0c3f8a0dea34af_7351	20e8a30293b7b0c63abbc29d0c4c19ee_1500	6db8800965c51df47e711e72bf22185f_608	0ed7320c6f511ce95f40560feeb5531a_608	K_pneumoniae_6_00724
glnH		glutamine ABC transporter substrate-binding protein GlnH	6	6	1	1	942				746	746	746	a177eae4552a0a1383f611870b669525_7192	40b06fe84ca1b8758d0c3f8a0dea34af_6662	20e8a30293b7b0c63abbc29d0c4c19ee_2189	6db8800965c51df47e711e72bf22185f_1297	0ed7320c6f511ce95f40560feeb5531a_1297	K_pneumoniae_6_00392
WP_014343117.1		transporter substrate-binding domain-containing protein	6	6	1	1	5701				851	878	855	a177eae4552a0a1383f611870b669525_5053	40b06fe84ca1b8758d0c3f8a0dea34af_5078	20e8a30293b7b0c63abbc29d0c4c19ee_2646	6db8800965c51df47e711e72bf22185f_2646	0ed7320c6f511ce95f40560feeb5531a_3280	K_pneumoniae_6_02024
hisS		histidine--tRNA ligase	6	6	1	1	763				1274	1274	1274	a177eae4552a0a1383f611870b669525_2641	40b06fe84ca1b8758d0c3f8a0dea34af_2115	20e8a30293b7b0c63abbc29d0c4c19ee_1234	6db8800965c51df47e711e72bf22185f_2229	0ed7320c6f511ce95f40560feeb5531a_2708	K_pneumoniae_6_01376
cho		excinuclease Cho	6	6	1	1	2194				863	863	863	a177eae4552a0a1383f611870b669525_6371	40b06fe84ca1b8758d0c3f8a0dea34af_5762	20e8a30293b7b0c63abbc29d0c4c19ee_6485	6db8800965c51df47e711e72bf22185f_6724	0ed7320c6f511ce95f40560feeb5531a_7280	K_pneumoniae_6_03185
zapE		cell division protein ZapE	6	6	1	1	5079				1127	1127	1127	a177eae4552a0a1383f611870b669525_1021	40b06fe84ca1b8758d0c3f8a0dea34af_400	20e8a30293b7b0c63abbc29d0c4c19ee_6299	6db8800965c51df47e711e72bf22185f_6359	0ed7320c6f511ce95f40560feeb5531a_6762	K_pneumoniae_6_03444
WP_004105804.1		TIGR00645 family protein	6	6	1	1	3916				494	494	494	a177eae4552a0a1383f611870b669525_1440	40b06fe84ca1b8758d0c3f8a0dea34af_819	20e8a30293b7b0c63abbc29d0c4c19ee_9657	6db8800965c51df47e711e72bf22185f_9653	0ed7320c6f511ce95f40560feeb5531a_9953	K_pneumoniae_6_04799
WP_004178413.1		RES domain-containing protein	6	6	1	1	5864				716	716	716	a177eae4552a0a1383f611870b669525_9249	40b06fe84ca1b8758d0c3f8a0dea34af_8719	20e8a30293b7b0c63abbc29d0c4c19ee_4443	6db8800965c51df47e711e72bf22185f_4526	0ed7320c6f511ce95f40560feeb5531a_5583	K_pneumoniae_6_01512
nikA		nickel ABC transporter substrate-binding protein	6	6	1	1	3433				1568	1568	1568	a177eae4552a0a1383f611870b669525_572	40b06fe84ca1b8758d0c3f8a0dea34af_10491	20e8a30293b7b0c63abbc29d0c4c19ee_7336	6db8800965c51df47e711e72bf22185f_7187	0ed7320c6f511ce95f40560feeb5531a_10431	K_pneumoniae_6_04965
nudC		NAD(+) diphosphatase	6	6	1	1	4926				773	773	773	a177eae4552a0a1383f611870b669525_9886	40b06fe84ca1b8758d0c3f8a0dea34af_9358	20e8a30293b7b0c63abbc29d0c4c19ee_10625	6db8800965c51df47e711e72bf22185f_10710	0ed7320c6f511ce95f40560feeb5531a_10662	K_pneumoniae_6_05090
yjdN		VOC family metalloprotein YjdN	6	6	1	1	98				434	434	434	a177eae4552a0a1383f611870b669525_9646	40b06fe84ca1b8758d0c3f8a0dea34af_9116	20e8a30293b7b0c63abbc29d0c4c19ee_4046	6db8800965c51df47e711e72bf22185f_4923	0ed7320c6f511ce95f40560feeb5531a_5186	K_pneumoniae_6_01702
WP_004179309.1		LysR family transcriptional regulator	6	6	1	1	4321				905	905	905	a177eae4552a0a1383f611870b669525_6735	40b06fe84ca1b8758d0c3f8a0dea34af_6206	20e8a30293b7b0c63abbc29d0c4c19ee_5264	6db8800965c51df47e711e72bf22185f_5288	0ed7320c6f511ce95f40560feeb5531a_5767	K_pneumoniae_6_00165
glgA		glycogen synthase GlgA	6	6	1	1	3533				1433	1433	1433	a177eae4552a0a1383f611870b669525_684	40b06fe84ca1b8758d0c3f8a0dea34af_63	20e8a30293b7b0c63abbc29d0c4c19ee_7226	6db8800965c51df47e711e72bf22185f_7297	0ed7320c6f511ce95f40560feeb5531a_8411	K_pneumoniae_6_04287
WP_004888643.1		TetR family transcriptional regulator	6	6	1	1	5683				536	575	568	a177eae4552a0a1383f611870b669525_5089	40b06fe84ca1b8758d0c3f8a0dea34af_5042	20e8a30293b7b0c63abbc29d0c4c19ee_2682	6db8800965c51df47e711e72bf22185f_2682	0ed7320c6f511ce95f40560feeb5531a_3244	K_pneumoniae_6_02006
thiL		thiamine-phosphate kinase	6	6	1	1	1406				971	971	971	a177eae4552a0a1383f611870b669525_8178	40b06fe84ca1b8758d0c3f8a0dea34af_7648	20e8a30293b7b0c63abbc29d0c4c19ee_5848	6db8800965c51df47e711e72bf22185f_311	0ed7320c6f511ce95f40560feeb5531a_311	K_pneumoniae_6_02907
corA		magnesium/cobalt transporter CorA	6	6	1	1	5174				950	950	950	a177eae4552a0a1383f611870b669525_10024	40b06fe84ca1b8758d0c3f8a0dea34af_9496	20e8a30293b7b0c63abbc29d0c4c19ee_8960	6db8800965c51df47e711e72bf22185f_9076	0ed7320c6f511ce95f40560feeb5531a_9491	K_pneumoniae_6_04475
WP_002916847.1		DUF1249 family protein	6	6	1	1	3839				422	422	422	a177eae4552a0a1383f611870b669525_1390	40b06fe84ca1b8758d0c3f8a0dea34af_769	20e8a30293b7b0c63abbc29d0c4c19ee_10684	6db8800965c51df47e711e72bf22185f_10800	0ed7320c6f511ce95f40560feeb5531a_10721	K_pneumoniae_6_05111
WP_004181430.1		GntR family transcriptional regulator	6	6	1	1	5091				629	629	629	a177eae4552a0a1383f611870b669525_997	40b06fe84ca1b8758d0c3f8a0dea34af_376	20e8a30293b7b0c63abbc29d0c4c19ee_6323	6db8800965c51df47e711e72bf22185f_6383	0ed7320c6f511ce95f40560feeb5531a_6786	K_pneumoniae_6_03432
group_1734	betT	choline BCCT transporter BetT	6	6	1	1	1184				2033	2033	2033	a177eae4552a0a1383f611870b669525_7725	40b06fe84ca1b8758d0c3f8a0dea34af_7195	20e8a30293b7b0c63abbc29d0c4c19ee_1656	6db8800965c51df47e711e72bf22185f_764	0ed7320c6f511ce95f40560feeb5531a_764	K_pneumoniae_6_00647
glnS		glutamine--tRNA ligase	6	6	1	1	1074				1667	1667	1667	a177eae4552a0a1383f611870b669525_7482	40b06fe84ca1b8758d0c3f8a0dea34af_6952	20e8a30293b7b0c63abbc29d0c4c19ee_1899	6db8800965c51df47e711e72bf22185f_1007	0ed7320c6f511ce95f40560feeb5531a_1007	K_pneumoniae_6_00530
pepT		peptidase T	6	6	1	1	5264				1232	1232	1232	a177eae4552a0a1383f611870b669525_6565	40b06fe84ca1b8758d0c3f8a0dea34af_6036	20e8a30293b7b0c63abbc29d0c4c19ee_8747	6db8800965c51df47e711e72bf22185f_8818	0ed7320c6f511ce95f40560feeb5531a_9278	K_pneumoniae_6_00085
WP_002892701.1		RcnB family protein	6	6	1	1	1254				455	455	455	a177eae4552a0a1383f611870b669525_7863	40b06fe84ca1b8758d0c3f8a0dea34af_7333	20e8a30293b7b0c63abbc29d0c4c19ee_1518	6db8800965c51df47e711e72bf22185f_626	0ed7320c6f511ce95f40560feeb5531a_626	K_pneumoniae_6_00715
WP_004178495.1		NAD-dependent succinate-semialdehyde dehydrogenase	6	6	1	1	1850				1370	1370	1370	a177eae4552a0a1383f611870b669525_9111	40b06fe84ca1b8758d0c3f8a0dea34af_8581	20e8a30293b7b0c63abbc29d0c4c19ee_5076	6db8800965c51df47e711e72bf22185f_3893	0ed7320c6f511ce95f40560feeb5531a_4372	K_pneumoniae_6_02541
dhaL		dihydroxyacetone kinase ADP-binding subunit DhaL	6	6	1	1	4955				632	632	632	a177eae4552a0a1383f611870b669525_1276	40b06fe84ca1b8758d0c3f8a0dea34af_655	20e8a30293b7b0c63abbc29d0c4c19ee_6044	6db8800965c51df47e711e72bf22185f_6104	0ed7320c6f511ce95f40560feeb5531a_6507	K_pneumoniae_6_03569
WP_020806255.1		helix-turn-helix domain-containing protein	6	6	1	1	5681				797	890	874	a177eae4552a0a1383f611870b669525_5093	40b06fe84ca1b8758d0c3f8a0dea34af_5038	20e8a30293b7b0c63abbc29d0c4c19ee_2686	6db8800965c51df47e711e72bf22185f_2686	0ed7320c6f511ce95f40560feeb5531a_3240	K_pneumoniae_6_02004
WP_004179196.1		YcbX family protein	6	6	1	1	4230				1109	1109	1109	a177eae4552a0a1383f611870b669525_6924	40b06fe84ca1b8758d0c3f8a0dea34af_6394	20e8a30293b7b0c63abbc29d0c4c19ee_5450	6db8800965c51df47e711e72bf22185f_5474	0ed7320c6f511ce95f40560feeb5531a_5953	K_pneumoniae_6_00255
mdcE		biotin-independent malonate decarboxylase subunit gamma	6	6	1	1	4163				800	800	800	a177eae4552a0a1383f611870b669525_5806	40b06fe84ca1b8758d0c3f8a0dea34af_4323	20e8a30293b7b0c63abbc29d0c4c19ee_6792	6db8800965c51df47e711e72bf22185f_7108	0ed7320c6f511ce95f40560feeb5531a_6896	K_pneumoniae_6_03733
WP_020324914.1		nickel/cobalt transporter	6	6	1	1	4552				956	956	956	a177eae4552a0a1383f611870b669525_1712	40b06fe84ca1b8758d0c3f8a0dea34af_1096	20e8a30293b7b0c63abbc29d0c4c19ee_9532	6db8800965c51df47e711e72bf22185f_9617	0ed7320c6f511ce95f40560feeb5531a_9915	K_pneumoniae_6_04742
WP_002888059.1		YgdI/YgdR family lipoprotein	6	6	1	1	1734				233	233	233	a177eae4552a0a1383f611870b669525_8863	40b06fe84ca1b8758d0c3f8a0dea34af_8333	20e8a30293b7b0c63abbc29d0c4c19ee_4828	6db8800965c51df47e711e72bf22185f_4141	0ed7320c6f511ce95f40560feeb5531a_4620	K_pneumoniae_6_02657
rnt		ribonuclease T	6	6	1	1	5801				647	647	647	a177eae4552a0a1383f611870b669525_4853	40b06fe84ca1b8758d0c3f8a0dea34af_5278	20e8a30293b7b0c63abbc29d0c4c19ee_2446	6db8800965c51df47e711e72bf22185f_2446	0ed7320c6f511ce95f40560feeb5531a_3480	K_pneumoniae_6_02120
WP_002887555.1		RidA family protein	6	6	1	1	1826				392	392	392	a177eae4552a0a1383f611870b669525_9061	40b06fe84ca1b8758d0c3f8a0dea34af_8531	20e8a30293b7b0c63abbc29d0c4c19ee_5026	6db8800965c51df47e711e72bf22185f_3943	0ed7320c6f511ce95f40560feeb5531a_4422	K_pneumoniae_6_02564
WP_004178391.1		DUF853 domain-containing protein	6	6	1	1	5891				1502	1502	1502	a177eae4552a0a1383f611870b669525_9306	40b06fe84ca1b8758d0c3f8a0dea34af_8776	20e8a30293b7b0c63abbc29d0c4c19ee_4386	6db8800965c51df47e711e72bf22185f_4583	0ed7320c6f511ce95f40560feeb5531a_5526	K_pneumoniae_6_01541
djlA		co-chaperone DjlA	6	6	1	1	1724				827	827	827	a177eae4552a0a1383f611870b669525_8843	40b06fe84ca1b8758d0c3f8a0dea34af_8313	20e8a30293b7b0c63abbc29d0c4c19ee_4808	6db8800965c51df47e711e72bf22185f_4161	0ed7320c6f511ce95f40560feeb5531a_4640	K_pneumoniae_6_02667
cysD		sulfate adenylyltransferase subunit CysD	6	6	1	1	1896				908	908	908	a177eae4552a0a1383f611870b669525_2070	40b06fe84ca1b8758d0c3f8a0dea34af_1454	20e8a30293b7b0c63abbc29d0c4c19ee_3489	6db8800965c51df47e711e72bf22185f_3466	0ed7320c6f511ce95f40560feeb5531a_3945	K_pneumoniae_6_02332
WP_002919125.1		DUF1488 domain-containing protein	6	6	1	1	5125				257	257	257	a177eae4552a0a1383f611870b669525_914	40b06fe84ca1b8758d0c3f8a0dea34af_293	20e8a30293b7b0c63abbc29d0c4c19ee_10823	6db8800965c51df47e711e72bf22185f_10908	0ed7320c6f511ce95f40560feeb5531a_10860	K_pneumoniae_6_05177
WP_004220034.1		muconate cycloisomerase family protein	6	6	1	1	5680				1118	1163	1155	a177eae4552a0a1383f611870b669525_5095	40b06fe84ca1b8758d0c3f8a0dea34af_5036	20e8a30293b7b0c63abbc29d0c4c19ee_2688	6db8800965c51df47e711e72bf22185f_2688	0ed7320c6f511ce95f40560feeb5531a_3238	K_pneumoniae_6_02003
WP_004181439.1		DUF1992 domain-containing protein	6	6	1	1	5138				368	368	368	a177eae4552a0a1383f611870b669525_888	40b06fe84ca1b8758d0c3f8a0dea34af_267	20e8a30293b7b0c63abbc29d0c4c19ee_10797	6db8800965c51df47e711e72bf22185f_10882	0ed7320c6f511ce95f40560feeb5531a_10834	K_pneumoniae_6_05164
dbpA		ATP-dependent RNA helicase DbpA	6	6	1	1	4051				1373	1373	1373	a177eae4552a0a1383f611870b669525_6030	40b06fe84ca1b8758d0c3f8a0dea34af_4097	20e8a30293b7b0c63abbc29d0c4c19ee_7016	6db8800965c51df47e711e72bf22185f_6884	0ed7320c6f511ce95f40560feeb5531a_7120	K_pneumoniae_6_04038
WP_002914891.1		NADH-quinone oxidoreductase subunit B family protein	6	6	1	1	1955				767	767	767	a177eae4552a0a1383f611870b669525_2188	40b06fe84ca1b8758d0c3f8a0dea34af_1572	20e8a30293b7b0c63abbc29d0c4c19ee_3371	6db8800965c51df47e711e72bf22185f_3584	0ed7320c6f511ce95f40560feeb5531a_4063	K_pneumoniae_6_02390
aroK		shikimate kinase AroK	6	6	1	1	5215				521	521	521	a177eae4552a0a1383f611870b669525_750	40b06fe84ca1b8758d0c3f8a0dea34af_129	20e8a30293b7b0c63abbc29d0c4c19ee_7160	6db8800965c51df47e711e72bf22185f_7363	0ed7320c6f511ce95f40560feeb5531a_8345	K_pneumoniae_6_04319
WP_004150118.1		MHS family MFS transporter	6	6	1	1	3395				1322	1322	1322	a177eae4552a0a1383f611870b669525_488	40b06fe84ca1b8758d0c3f8a0dea34af_10407	20e8a30293b7b0c63abbc29d0c4c19ee_8858	6db8800965c51df47e711e72bf22185f_8929	0ed7320c6f511ce95f40560feeb5531a_9332	K_pneumoniae_6_04576
WP_002903059.1		amino acid permease	6	6	1	1	4100				1430	1430	1430	a177eae4552a0a1383f611870b669525_5932	40b06fe84ca1b8758d0c3f8a0dea34af_4197	20e8a30293b7b0c63abbc29d0c4c19ee_6918	6db8800965c51df47e711e72bf22185f_6982	0ed7320c6f511ce95f40560feeb5531a_7022	K_pneumoniae_6_04086
WP_004178755.1		dTDP-glucose pyrophosphorylase	6	6	1	1	1357				407	407	407	a177eae4552a0a1383f611870b669525_8080	40b06fe84ca1b8758d0c3f8a0dea34af_7550	20e8a30293b7b0c63abbc29d0c4c19ee_5946	6db8800965c51df47e711e72bf22185f_409	0ed7320c6f511ce95f40560feeb5531a_409	K_pneumoniae_6_02858
nqrE		NADH:ubiquinone reductase (Na(+)-transporting) subunit E	6	6	1	1	1536				596	596	596	a177eae4552a0a1383f611870b669525_8441	40b06fe84ca1b8758d0c3f8a0dea34af_7911	20e8a30293b7b0c63abbc29d0c4c19ee_5585	6db8800965c51df47e711e72bf22185f_48	0ed7320c6f511ce95f40560feeb5531a_48	K_pneumoniae_6_03035
citX		citrate lyase holo-[acyl-carrier protein] synthase	6	6	1	1	1720				539	539	539	a177eae4552a0a1383f611870b669525_8835	40b06fe84ca1b8758d0c3f8a0dea34af_8305	20e8a30293b7b0c63abbc29d0c4c19ee_4800	6db8800965c51df47e711e72bf22185f_4169	0ed7320c6f511ce95f40560feeb5531a_4648	K_pneumoniae_6_02671
bglJ		DNA-binding transcriptional activator BglJ	6	6	1	1	1802				674	674	674	a177eae4552a0a1383f611870b669525_9013	40b06fe84ca1b8758d0c3f8a0dea34af_8483	20e8a30293b7b0c63abbc29d0c4c19ee_4978	6db8800965c51df47e711e72bf22185f_3991	0ed7320c6f511ce95f40560feeb5531a_4470	K_pneumoniae_6_02588
WP_020324756.1		PTS transporter subunit EIIC	6	6	1	1	5626				1235	1280	1242	a177eae4552a0a1383f611870b669525_5203	40b06fe84ca1b8758d0c3f8a0dea34af_4928	20e8a30293b7b0c63abbc29d0c4c19ee_2796	6db8800965c51df47e711e72bf22185f_2796	0ed7320c6f511ce95f40560feeb5531a_3130	K_pneumoniae_6_01953
WP_002918206.1		YraN family protein	6	6	1	1	5005				386	386	386	a177eae4552a0a1383f611870b669525_1177	40b06fe84ca1b8758d0c3f8a0dea34af_556	20e8a30293b7b0c63abbc29d0c4c19ee_6143	6db8800965c51df47e711e72bf22185f_6203	0ed7320c6f511ce95f40560feeb5531a_6606	K_pneumoniae_6_03519
WP_002896351.1		inner membrane protein YbjM	6	6	1	1	900				383	383	383	a177eae4552a0a1383f611870b669525_7110	40b06fe84ca1b8758d0c3f8a0dea34af_6580	20e8a30293b7b0c63abbc29d0c4c19ee_2271	6db8800965c51df47e711e72bf22185f_1379	0ed7320c6f511ce95f40560feeb5531a_1379	K_pneumoniae_6_00351
WP_004151678.1		phosphodiester glycosidase family protein	6	6	1	1	1210				719	719	719	a177eae4552a0a1383f611870b669525_7777	40b06fe84ca1b8758d0c3f8a0dea34af_7247	20e8a30293b7b0c63abbc29d0c4c19ee_1604	6db8800965c51df47e711e72bf22185f_712	0ed7320c6f511ce95f40560feeb5531a_712	K_pneumoniae_6_00673
WP_004176560.1		cupin domain-containing protein	6	6	1	1	5265				1121	1121	1121	a177eae4552a0a1383f611870b669525_6563	40b06fe84ca1b8758d0c3f8a0dea34af_6034	20e8a30293b7b0c63abbc29d0c4c19ee_8745	6db8800965c51df47e711e72bf22185f_8816	0ed7320c6f511ce95f40560feeb5531a_9276	K_pneumoniae_6_00084
WP_004179872.1		aldo/keto reductase	6	6	1	1	5512				986	986	986	a177eae4552a0a1383f611870b669525_5434	40b06fe84ca1b8758d0c3f8a0dea34af_4697	20e8a30293b7b0c63abbc29d0c4c19ee_3028	6db8800965c51df47e711e72bf22185f_3028	0ed7320c6f511ce95f40560feeb5531a_2898	K_pneumoniae_6_01844
WP_002912974.1		YejG family protein	6	6	1	1	515				344	344	344	a177eae4552a0a1383f611870b669525_3164	40b06fe84ca1b8758d0c3f8a0dea34af_2638	20e8a30293b7b0c63abbc29d0c4c19ee_711	6db8800965c51df47e711e72bf22185f_1706	0ed7320c6f511ce95f40560feeb5531a_2185	K_pneumoniae_6_01126
hycI		hydrogenase maturation peptidase HycI	6	6	1	1	1957				470	470	470	a177eae4552a0a1383f611870b669525_2192	40b06fe84ca1b8758d0c3f8a0dea34af_1576	20e8a30293b7b0c63abbc29d0c4c19ee_3367	6db8800965c51df47e711e72bf22185f_3588	0ed7320c6f511ce95f40560feeb5531a_4067	K_pneumoniae_6_02392
queG		tRNA epoxyqueuosine(34) reductase QueG	6	6	1	1	5937				1139	1139	1139	a177eae4552a0a1383f611870b669525_9518	40b06fe84ca1b8758d0c3f8a0dea34af_8988	20e8a30293b7b0c63abbc29d0c4c19ee_4174	6db8800965c51df47e711e72bf22185f_4795	0ed7320c6f511ce95f40560feeb5531a_5314	K_pneumoniae_6_01643
WP_004178753.1		SmdA family multidrug ABC transporter permease/ATP-binding protein	6	6	1	1	1364				1772	1772	1772	a177eae4552a0a1383f611870b669525_8094	40b06fe84ca1b8758d0c3f8a0dea34af_7564	20e8a30293b7b0c63abbc29d0c4c19ee_5932	6db8800965c51df47e711e72bf22185f_395	0ed7320c6f511ce95f40560feeb5531a_395	K_pneumoniae_6_02865
WP_004178756.1		PLP-dependent aminotransferase family protein	6	6	1	1	1354				1427	1427	1427	a177eae4552a0a1383f611870b669525_8071	40b06fe84ca1b8758d0c3f8a0dea34af_7541	20e8a30293b7b0c63abbc29d0c4c19ee_5955	6db8800965c51df47e711e72bf22185f_418	0ed7320c6f511ce95f40560feeb5531a_418	K_pneumoniae_6_02855
WP_043906781.1		sensor domain-containing diguanylate cyclase	6	6	1	1	5590				1139	1256	1236	a177eae4552a0a1383f611870b669525_5278	40b06fe84ca1b8758d0c3f8a0dea34af_4853	20e8a30293b7b0c63abbc29d0c4c19ee_2872	6db8800965c51df47e711e72bf22185f_2872	0ed7320c6f511ce95f40560feeb5531a_3054	K_pneumoniae_6_01918
mreB		rod shape-determining protein MreB	6	6	1	1	5107				1043	1043	1043	a177eae4552a0a1383f611870b669525_965	40b06fe84ca1b8758d0c3f8a0dea34af_344	20e8a30293b7b0c63abbc29d0c4c19ee_6355	6db8800965c51df47e711e72bf22185f_6415	0ed7320c6f511ce95f40560feeb5531a_6818	K_pneumoniae_6_03416
WP_002901761.1		YciN family protein	6	6	1	1	3224				251	251	251	a177eae4552a0a1383f611870b669525_6268	40b06fe84ca1b8758d0c3f8a0dea34af_5659	20e8a30293b7b0c63abbc29d0c4c19ee_6588	6db8800965c51df47e711e72bf22185f_6621	0ed7320c6f511ce95f40560feeb5531a_7383	K_pneumoniae_6_03137
sirB1		invasion regulator SirB1	6	6	1	1	4656				812	812	812	a177eae4552a0a1383f611870b669525_4279	40b06fe84ca1b8758d0c3f8a0dea34af_3674	20e8a30293b7b0c63abbc29d0c4c19ee_10047	6db8800965c51df47e711e72bf22185f_10131	0ed7320c6f511ce95f40560feeb5531a_6394	K_pneumoniae_6_03252
nusB		transcription antitermination factor NusB	6	6	1	1	1407				419	419	419	a177eae4552a0a1383f611870b669525_8180	40b06fe84ca1b8758d0c3f8a0dea34af_7650	20e8a30293b7b0c63abbc29d0c4c19ee_5846	6db8800965c51df47e711e72bf22185f_309	0ed7320c6f511ce95f40560feeb5531a_309	K_pneumoniae_6_02908
tsaE		tRNA (adenosine(37)-N6)-threonylcarbamoyltransferase complex ATPase subunit type 1 TsaE	6	6	1	1	5939				461	461	461	a177eae4552a0a1383f611870b669525_9514	40b06fe84ca1b8758d0c3f8a0dea34af_8984	20e8a30293b7b0c63abbc29d0c4c19ee_4178	6db8800965c51df47e711e72bf22185f_4791	0ed7320c6f511ce95f40560feeb5531a_5318	K_pneumoniae_6_01641
fpr		ferredoxin--NADP(+) reductase	6	6	1	1	4838				746	746	746	a177eae4552a0a1383f611870b669525_223	40b06fe84ca1b8758d0c3f8a0dea34af_9910	20e8a30293b7b0c63abbc29d0c4c19ee_7492	6db8800965c51df47e711e72bf22185f_7605	0ed7320c6f511ce95f40560feeb5531a_7616	K_pneumoniae_6_03639
hpxW		oxamate amidohydrolase	6	6	1	1	5565				1586	1586	1586	a177eae4552a0a1383f611870b669525_5328	40b06fe84ca1b8758d0c3f8a0dea34af_4803	20e8a30293b7b0c63abbc29d0c4c19ee_2922	6db8800965c51df47e711e72bf22185f_2922	0ed7320c6f511ce95f40560feeb5531a_3004	K_pneumoniae_6_01895
WP_004179839.1		hypothetical protein	6	6	1	1	30				281	281	281	a177eae4552a0a1383f611870b669525_5484	40b06fe84ca1b8758d0c3f8a0dea34af_4645	20e8a30293b7b0c63abbc29d0c4c19ee_3078	6db8800965c51df47e711e72bf22185f_3078	0ed7320c6f511ce95f40560feeb5531a_2848	K_pneumoniae_6_01822
orn		oligoribonuclease	6	6	1	1	5935				545	545	545	a177eae4552a0a1383f611870b669525_9531	40b06fe84ca1b8758d0c3f8a0dea34af_9001	20e8a30293b7b0c63abbc29d0c4c19ee_4161	6db8800965c51df47e711e72bf22185f_4808	0ed7320c6f511ce95f40560feeb5531a_5301	K_pneumoniae_6_01648
ilvM		acetolactate synthase 2 small subunit	6	6	1	1	3000				257	257	257	a177eae4552a0a1383f611870b669525_10118	40b06fe84ca1b8758d0c3f8a0dea34af_9590	20e8a30293b7b0c63abbc29d0c4c19ee_9054	6db8800965c51df47e711e72bf22185f_8982	0ed7320c6f511ce95f40560feeb5531a_9585	K_pneumoniae_6_04520
WP_022631197.1		helix-turn-helix transcriptional regulator	6	6	1	1	5579				773	800	795	a177eae4552a0a1383f611870b669525_5300	40b06fe84ca1b8758d0c3f8a0dea34af_4831	20e8a30293b7b0c63abbc29d0c4c19ee_2894	6db8800965c51df47e711e72bf22185f_2894	0ed7320c6f511ce95f40560feeb5531a_3032	K_pneumoniae_6_01907
rdgC		recombination-associated protein RdgC	6	6	1	1	1441				911	911	911	a177eae4552a0a1383f611870b669525_8248	40b06fe84ca1b8758d0c3f8a0dea34af_7718	20e8a30293b7b0c63abbc29d0c4c19ee_5778	6db8800965c51df47e711e72bf22185f_241	0ed7320c6f511ce95f40560feeb5531a_241	K_pneumoniae_6_02941
rplK		50S ribosomal protein L11	6	6	1	1	4943				428	428	428	a177eae4552a0a1383f611870b669525_9921	40b06fe84ca1b8758d0c3f8a0dea34af_9393	20e8a30293b7b0c63abbc29d0c4c19ee_10660	6db8800965c51df47e711e72bf22185f_10745	0ed7320c6f511ce95f40560feeb5531a_10697	K_pneumoniae_6_05073
WP_004145694.1		TIM barrel protein	6	6	1	1	2035				863	863	863	a177eae4552a0a1383f611870b669525_2361	40b06fe84ca1b8758d0c3f8a0dea34af_1745	20e8a30293b7b0c63abbc29d0c4c19ee_3196	6db8800965c51df47e711e72bf22185f_3757	0ed7320c6f511ce95f40560feeb5531a_4236	K_pneumoniae_6_02475
selA		L-seryl-tRNA(Sec) selenium transferase	6	6	1	1	187				1388	1388	1388	a177eae4552a0a1383f611870b669525_353	40b06fe84ca1b8758d0c3f8a0dea34af_10272	20e8a30293b7b0c63abbc29d0c4c19ee_7622	6db8800965c51df47e711e72bf22185f_7475	0ed7320c6f511ce95f40560feeb5531a_7746	K_pneumoniae_6_03701
hpaB		4-hydroxyphenylacetate 3-monooxygenase, oxygenase component	6	6	1	1	1842				1562	1562	1562	a177eae4552a0a1383f611870b669525_9095	40b06fe84ca1b8758d0c3f8a0dea34af_8565	20e8a30293b7b0c63abbc29d0c4c19ee_5060	6db8800965c51df47e711e72bf22185f_3909	0ed7320c6f511ce95f40560feeb5531a_4388	K_pneumoniae_6_02549
nadC		carboxylating nicotinate-nucleotide diphosphorylase	6	6	1	1	1664				893	893	893	a177eae4552a0a1383f611870b669525_8722	40b06fe84ca1b8758d0c3f8a0dea34af_8192	20e8a30293b7b0c63abbc29d0c4c19ee_4687	6db8800965c51df47e711e72bf22185f_4282	0ed7320c6f511ce95f40560feeb5531a_4761	K_pneumoniae_6_02727
WP_004175724.1		gluconate 2-dehydrogenase subunit 3 family protein	6	6	1	1	4014				755	755	755	a177eae4552a0a1383f611870b669525_4643	40b06fe84ca1b8758d0c3f8a0dea34af_5489	20e8a30293b7b0c63abbc29d0c4c19ee_10427	6db8800965c51df47e711e72bf22185f_10512	0ed7320c6f511ce95f40560feeb5531a_10478	K_pneumoniae_6_04987
WP_002892023.1		PLP-dependent aminotransferase family protein	6	6	1	1	1337				1451	1451	1451	a177eae4552a0a1383f611870b669525_8037	40b06fe84ca1b8758d0c3f8a0dea34af_7507	20e8a30293b7b0c63abbc29d0c4c19ee_1344	6db8800965c51df47e711e72bf22185f_452	0ed7320c6f511ce95f40560feeb5531a_452	K_pneumoniae_6_02837
WP_004180147.1		DUF3313 domain-containing protein	6	6	1	1	5749				668	668	668	a177eae4552a0a1383f611870b669525_4957	40b06fe84ca1b8758d0c3f8a0dea34af_5174	20e8a30293b7b0c63abbc29d0c4c19ee_2550	6db8800965c51df47e711e72bf22185f_2550	0ed7320c6f511ce95f40560feeb5531a_3376	K_pneumoniae_6_02068
WP_004145929.1		MFS transporter	6	6	1	1	1660				1406	1406	1406	a177eae4552a0a1383f611870b669525_8714	40b06fe84ca1b8758d0c3f8a0dea34af_8184	20e8a30293b7b0c63abbc29d0c4c19ee_4679	6db8800965c51df47e711e72bf22185f_4290	0ed7320c6f511ce95f40560feeb5531a_4769	K_pneumoniae_6_02731
WP_072143287.1		ASCH domain-containing protein	6	6	1	1	5577				356	410	365	a177eae4552a0a1383f611870b669525_5304	40b06fe84ca1b8758d0c3f8a0dea34af_4827	20e8a30293b7b0c63abbc29d0c4c19ee_2898	6db8800965c51df47e711e72bf22185f_2898	0ed7320c6f511ce95f40560feeb5531a_3028	K_pneumoniae_6_01905
metQ		methionine ABC transporter substrate-binding lipoprotein MetQ	6	6	1	1	1561				815	815	815	a177eae4552a0a1383f611870b669525_8512	40b06fe84ca1b8758d0c3f8a0dea34af_7982	20e8a30293b7b0c63abbc29d0c4c19ee_4477	6db8800965c51df47e711e72bf22185f_4492	0ed7320c6f511ce95f40560feeb5531a_4971	K_pneumoniae_6_02827
ecpD		fimbrial adhesin EcpD	6	6	1	1	1486				1643	1643	1643	a177eae4552a0a1383f611870b669525_8338	40b06fe84ca1b8758d0c3f8a0dea34af_7808	20e8a30293b7b0c63abbc29d0c4c19ee_5688	6db8800965c51df47e711e72bf22185f_151	0ed7320c6f511ce95f40560feeb5531a_151	K_pneumoniae_6_02984
cadC		lysine decarboxylation/transport transcriptional activator CadC	6	6	1	1	1280				1568	1568	1568	a177eae4552a0a1383f611870b669525_7917	40b06fe84ca1b8758d0c3f8a0dea34af_7387	20e8a30293b7b0c63abbc29d0c4c19ee_1464	6db8800965c51df47e711e72bf22185f_572	0ed7320c6f511ce95f40560feeb5531a_572	K_pneumoniae_6_00742
WP_002890128.1		branched-chain amino acid ABC transporter permease	6	6	1	1	1476				899	899	899	a177eae4552a0a1383f611870b669525_8318	40b06fe84ca1b8758d0c3f8a0dea34af_7788	20e8a30293b7b0c63abbc29d0c4c19ee_5708	6db8800965c51df47e711e72bf22185f_171	0ed7320c6f511ce95f40560feeb5531a_171	K_pneumoniae_6_02974
ptsP		phosphoenolpyruvate--protein phosphotransferase	6	6	1	1	4276				2501	2501	2501	a177eae4552a0a1383f611870b669525_6827	40b06fe84ca1b8758d0c3f8a0dea34af_6295	20e8a30293b7b0c63abbc29d0c4c19ee_5353	6db8800965c51df47e711e72bf22185f_5377	0ed7320c6f511ce95f40560feeb5531a_5856	K_pneumoniae_6_00209
WP_223291272.1		hypothetical protein	6	6	1	1	2506				689	689	689	a177eae4552a0a1383f611870b669525_3939	40b06fe84ca1b8758d0c3f8a0dea34af_3336	20e8a30293b7b0c63abbc29d0c4c19ee_15	6db8800965c51df47e711e72bf22185f_6029	0ed7320c6f511ce95f40560feeb5531a_1489	K_pneumoniae_6_00794
WP_004178298.1		response regulator transcription factor	6	6	1	1	117				728	728	728	a177eae4552a0a1383f611870b669525_9684	40b06fe84ca1b8758d0c3f8a0dea34af_9154	20e8a30293b7b0c63abbc29d0c4c19ee_4008	6db8800965c51df47e711e72bf22185f_4961	0ed7320c6f511ce95f40560feeb5531a_5148	K_pneumoniae_6_01721
ubiD		4-hydroxy-3-polyprenylbenzoate decarboxylase	6	6	1	1	5198				1475	1475	1475	a177eae4552a0a1383f611870b669525_9976	40b06fe84ca1b8758d0c3f8a0dea34af_9448	20e8a30293b7b0c63abbc29d0c4c19ee_8912	6db8800965c51df47e711e72bf22185f_9124	0ed7320c6f511ce95f40560feeb5531a_9443	K_pneumoniae_6_04451
hisG		ATP phosphoribosyltransferase	6	6	1	1	3688				899	899	899	a177eae4552a0a1383f611870b669525_3447	40b06fe84ca1b8758d0c3f8a0dea34af_2911	20e8a30293b7b0c63abbc29d0c4c19ee_426	6db8800965c51df47e711e72bf22185f_5618	0ed7320c6f511ce95f40560feeb5531a_1900	K_pneumoniae_6_00988
WP_043906777.1		PTS sugar transporter subunit IIA	6	6	1	1	12				371	458	412	a177eae4552a0a1383f611870b669525_5520	40b06fe84ca1b8758d0c3f8a0dea34af_4609	20e8a30293b7b0c63abbc29d0c4c19ee_3114	6db8800965c51df47e711e72bf22185f_3114	0ed7320c6f511ce95f40560feeb5531a_2812	K_pneumoniae_6_01804
WP_014907574.1		GNAT family N-acetyltransferase	6	6	1	1	5547				536	578	571	a177eae4552a0a1383f611870b669525_5364	40b06fe84ca1b8758d0c3f8a0dea34af_4767	20e8a30293b7b0c63abbc29d0c4c19ee_2958	6db8800965c51df47e711e72bf22185f_2958	0ed7320c6f511ce95f40560feeb5531a_2968	K_pneumoniae_6_01878
sanA		outer membrane permeability protein SanA	6	6	1	1	486				716	716	716	a177eae4552a0a1383f611870b669525_3222	40b06fe84ca1b8758d0c3f8a0dea34af_2696	20e8a30293b7b0c63abbc29d0c4c19ee_653	6db8800965c51df47e711e72bf22185f_1648	0ed7320c6f511ce95f40560feeb5531a_2127	K_pneumoniae_6_01097
WP_004180285.1		DUF4926 domain-containing protein	6	6	1	1	4016				683	683	683	a177eae4552a0a1383f611870b669525_4639	40b06fe84ca1b8758d0c3f8a0dea34af_5493	20e8a30293b7b0c63abbc29d0c4c19ee_10431	6db8800965c51df47e711e72bf22185f_10516	0ed7320c6f511ce95f40560feeb5531a_10474	K_pneumoniae_6_04985
WP_004181596.1		BamA/TamA family outer membrane protein	6	6	1	1	4776				1133	1133	1133	a177eae4552a0a1383f611870b669525_15	40b06fe84ca1b8758d0c3f8a0dea34af_10118	20e8a30293b7b0c63abbc29d0c4c19ee_9778	6db8800965c51df47e711e72bf22185f_9863	0ed7320c6f511ce95f40560feeb5531a_10128	K_pneumoniae_6_01452
cadA		lysine decarboxylase CadA	6	6	1	1	1278				2147	2147	2147	a177eae4552a0a1383f611870b669525_7913	40b06fe84ca1b8758d0c3f8a0dea34af_7383	20e8a30293b7b0c63abbc29d0c4c19ee_1468	6db8800965c51df47e711e72bf22185f_576	0ed7320c6f511ce95f40560feeb5531a_576	K_pneumoniae_6_00740
WP_002912641.1		ABC transporter permease	6	6	1	1	3614				905	905	905	a177eae4552a0a1383f611870b669525_3319	40b06fe84ca1b8758d0c3f8a0dea34af_2795	20e8a30293b7b0c63abbc29d0c4c19ee_556	6db8800965c51df47e711e72bf22185f_1551	0ed7320c6f511ce95f40560feeb5531a_2030	K_pneumoniae_6_01049
WP_004176404.1		hypothetical protein	6	6	1	1	4047				194	194	194	a177eae4552a0a1383f611870b669525_6038	40b06fe84ca1b8758d0c3f8a0dea34af_4089	20e8a30293b7b0c63abbc29d0c4c19ee_7024	6db8800965c51df47e711e72bf22185f_6876	0ed7320c6f511ce95f40560feeb5531a_7128	K_pneumoniae_6_04034
sulA		cell division inhibitor SulA	6	6	1	1	4241				509	509	509	a177eae4552a0a1383f611870b669525_6902	40b06fe84ca1b8758d0c3f8a0dea34af_6372	20e8a30293b7b0c63abbc29d0c4c19ee_5428	6db8800965c51df47e711e72bf22185f_5452	0ed7320c6f511ce95f40560feeb5531a_5931	K_pneumoniae_6_00245
WP_004179357.1		manganese catalase family protein	6	6	1	1	5285				887	887	887	a177eae4552a0a1383f611870b669525_6523	40b06fe84ca1b8758d0c3f8a0dea34af_5994	20e8a30293b7b0c63abbc29d0c4c19ee_8705	6db8800965c51df47e711e72bf22185f_8776	0ed7320c6f511ce95f40560feeb5531a_9236	K_pneumoniae_6_00065
glnD		bifunctional uridylyltransferase/uridylyl-removing protein GlnD	6	6	1	1	1592				2663	2663	2663	a177eae4552a0a1383f611870b669525_8574	40b06fe84ca1b8758d0c3f8a0dea34af_8044	20e8a30293b7b0c63abbc29d0c4c19ee_4539	6db8800965c51df47e711e72bf22185f_4430	0ed7320c6f511ce95f40560feeb5531a_4909	K_pneumoniae_6_02796
WP_004178403.1		integrase arm-type DNA-binding domain-containing protein	6	6	1	1	5873				1265	1265	1265	a177eae4552a0a1383f611870b669525_9267	40b06fe84ca1b8758d0c3f8a0dea34af_8737	20e8a30293b7b0c63abbc29d0c4c19ee_4425	6db8800965c51df47e711e72bf22185f_4544	0ed7320c6f511ce95f40560feeb5531a_5565	K_pneumoniae_6_01522
WP_002905131.1		PTS sugar transporter subunit IIA	6	6	1	1	5539				455	470	467	a177eae4552a0a1383f611870b669525_5380	40b06fe84ca1b8758d0c3f8a0dea34af_4751	20e8a30293b7b0c63abbc29d0c4c19ee_2974	6db8800965c51df47e711e72bf22185f_2974	0ed7320c6f511ce95f40560feeb5531a_2952	K_pneumoniae_6_01871
WP_004176149.1		phosphotriesterase-related protein	6	6	1	1	5528				1079	1079	1079	a177eae4552a0a1383f611870b669525_5402	40b06fe84ca1b8758d0c3f8a0dea34af_4729	20e8a30293b7b0c63abbc29d0c4c19ee_2996	6db8800965c51df47e711e72bf22185f_2996	0ed7320c6f511ce95f40560feeb5531a_2930	K_pneumoniae_6_01860
yqhD		alcohol dehydrogenase	6	6	1	1	3924				1163	1163	1163	a177eae4552a0a1383f611870b669525_1424	40b06fe84ca1b8758d0c3f8a0dea34af_803	20e8a30293b7b0c63abbc29d0c4c19ee_9675	6db8800965c51df47e711e72bf22185f_9637	0ed7320c6f511ce95f40560feeb5531a_9935	K_pneumoniae_6_04807
WP_004178371.1		DgaE family pyridoxal phosphate-dependent ammonia lyase	6	6	1	1	5921				1118	1118	1118	a177eae4552a0a1383f611870b669525_9368	40b06fe84ca1b8758d0c3f8a0dea34af_8838	20e8a30293b7b0c63abbc29d0c4c19ee_4324	6db8800965c51df47e711e72bf22185f_4645	0ed7320c6f511ce95f40560feeb5531a_5464	K_pneumoniae_6_01570
rph		ribonuclease PH	6	6	1	1	232				716	716	716	a177eae4552a0a1383f611870b669525_259	40b06fe84ca1b8758d0c3f8a0dea34af_10178	20e8a30293b7b0c63abbc29d0c4c19ee_7528	6db8800965c51df47e711e72bf22185f_7569	0ed7320c6f511ce95f40560feeb5531a_7652	K_pneumoniae_6_03656
WP_004178882.1		MFS transporter	6	6	1	1	1243				1172	1172	1172	a177eae4552a0a1383f611870b669525_7841	40b06fe84ca1b8758d0c3f8a0dea34af_7311	20e8a30293b7b0c63abbc29d0c4c19ee_1540	6db8800965c51df47e711e72bf22185f_648	0ed7320c6f511ce95f40560feeb5531a_648	K_pneumoniae_6_00706
WP_004178395.1		ABC transporter substrate-binding protein	6	6	1	1	5881				1310	1310	1310	a177eae4552a0a1383f611870b669525_9286	40b06fe84ca1b8758d0c3f8a0dea34af_8756	20e8a30293b7b0c63abbc29d0c4c19ee_4406	6db8800965c51df47e711e72bf22185f_4563	0ed7320c6f511ce95f40560feeb5531a_5546	K_pneumoniae_6_01531
glnE		bifunctional [glutamate--ammonia ligase]-adenylyl-L-tyrosine phosphorylase/[glutamate--ammonia-ligase] adenylyltransferase	6	6	1	1	3827				2837	2837	2837	a177eae4552a0a1383f611870b669525_1365	40b06fe84ca1b8758d0c3f8a0dea34af_744	20e8a30293b7b0c63abbc29d0c4c19ee_10709	6db8800965c51df47e711e72bf22185f_10775	0ed7320c6f511ce95f40560feeb5531a_10746	K_pneumoniae_6_05122
drpB		cell division protein DrpB	6	6	1	1	2352				281	281	281	a177eae4552a0a1383f611870b669525_3720	40b06fe84ca1b8758d0c3f8a0dea34af_3117	20e8a30293b7b0c63abbc29d0c4c19ee_234	6db8800965c51df47e711e72bf22185f_5810	0ed7320c6f511ce95f40560feeb5531a_1708	K_pneumoniae_6_00897
rstB		two-component system sensor histidine kinase RstB	6	6	1	1	4122				1301	1301	1301	a177eae4552a0a1383f611870b669525_5888	40b06fe84ca1b8758d0c3f8a0dea34af_4241	20e8a30293b7b0c63abbc29d0c4c19ee_6874	6db8800965c51df47e711e72bf22185f_7026	0ed7320c6f511ce95f40560feeb5531a_6978	K_pneumoniae_6_04107
WP_004145041.1		PTS sugar transporter subunit IIB	6	6	1	1	4892				314	314	314	a177eae4552a0a1383f611870b669525_112	40b06fe84ca1b8758d0c3f8a0dea34af_10021	20e8a30293b7b0c63abbc29d0c4c19ee_7381	6db8800965c51df47e711e72bf22185f_7716	0ed7320c6f511ce95f40560feeb5531a_7505	K_pneumoniae_6_03585
WP_004198552.1		ATP-binding cassette domain-containing protein	6	6	1	1	5526				746	782	752	a177eae4552a0a1383f611870b669525_5406	40b06fe84ca1b8758d0c3f8a0dea34af_4725	20e8a30293b7b0c63abbc29d0c4c19ee_3000	6db8800965c51df47e711e72bf22185f_3000	0ed7320c6f511ce95f40560feeb5531a_2926	K_pneumoniae_6_01858
mrdA		penicillin-binding protein 2	6	6	1	1	5614				1910	1910	1910	a177eae4552a0a1383f611870b669525_5227	40b06fe84ca1b8758d0c3f8a0dea34af_4904	20e8a30293b7b0c63abbc29d0c4c19ee_2821	6db8800965c51df47e711e72bf22185f_2821	0ed7320c6f511ce95f40560feeb5531a_3105	K_pneumoniae_6_01941
pbpG		D-alanyl-D-alanine endopeptidase	6	6	1	1	473				950	950	950	a177eae4552a0a1383f611870b669525_3246	40b06fe84ca1b8758d0c3f8a0dea34af_2722	20e8a30293b7b0c63abbc29d0c4c19ee_629	6db8800965c51df47e711e72bf22185f_1624	0ed7320c6f511ce95f40560feeb5531a_2103	K_pneumoniae_6_01085
WP_004179130.1		Cof-type HAD-IIB family hydrolase	6	6	1	1	904				812	812	812	a177eae4552a0a1383f611870b669525_7118	40b06fe84ca1b8758d0c3f8a0dea34af_6588	20e8a30293b7b0c63abbc29d0c4c19ee_2263	6db8800965c51df47e711e72bf22185f_1371	0ed7320c6f511ce95f40560feeb5531a_1371	K_pneumoniae_6_00355
yhjD		inner membrane protein YhjD	6	6	1	1	3396				1031	1031	1031	a177eae4552a0a1383f611870b669525_490	40b06fe84ca1b8758d0c3f8a0dea34af_10409	20e8a30293b7b0c63abbc29d0c4c19ee_8860	6db8800965c51df47e711e72bf22185f_8931	0ed7320c6f511ce95f40560feeb5531a_9330	K_pneumoniae_6_04577
eefC		multidrug efflux RND transporter outer membrane subunit EefC	6	6	1	1	4878				1364	1364	1364	a177eae4552a0a1383f611870b669525_140	40b06fe84ca1b8758d0c3f8a0dea34af_9993	20e8a30293b7b0c63abbc29d0c4c19ee_7409	6db8800965c51df47e711e72bf22185f_7688	0ed7320c6f511ce95f40560feeb5531a_7533	K_pneumoniae_6_03600
WP_004178721.1		transposase	6	6	1	1	1462				491	491	491	a177eae4552a0a1383f611870b669525_8290	40b06fe84ca1b8758d0c3f8a0dea34af_7760	20e8a30293b7b0c63abbc29d0c4c19ee_5736	6db8800965c51df47e711e72bf22185f_199	0ed7320c6f511ce95f40560feeb5531a_199	K_pneumoniae_6_02962
carB		carbamoyl-phosphate synthase large subunit	6	6	1	1	1735				3224	3224	3224	a177eae4552a0a1383f611870b669525_8865	40b06fe84ca1b8758d0c3f8a0dea34af_8335	20e8a30293b7b0c63abbc29d0c4c19ee_4830	6db8800965c51df47e711e72bf22185f_4139	0ed7320c6f511ce95f40560feeb5531a_4618	K_pneumoniae_6_02656
WP_004177568.1		DUF1294 domain-containing protein	6	6	1	1	842				347	347	347	a177eae4552a0a1383f611870b669525_9197	40b06fe84ca1b8758d0c3f8a0dea34af_8667	20e8a30293b7b0c63abbc29d0c4c19ee_10941	6db8800965c51df47e711e72bf22185f_10994	0ed7320c6f511ce95f40560feeb5531a_10990	K_pneumoniae_6_05211
pduC		propanediol dehydratase large subunit PduC	6	6	1	1	4471				1664	1664	1664	a177eae4552a0a1383f611870b669525_1876	40b06fe84ca1b8758d0c3f8a0dea34af_1260	20e8a30293b7b0c63abbc29d0c4c19ee_3683	6db8800965c51df47e711e72bf22185f_3272	0ed7320c6f511ce95f40560feeb5531a_3751	K_pneumoniae_6_02241
celB		PTS cellobiose transporter subunit IIC	6	6	1	1	5910				1352	1352	1352	a177eae4552a0a1383f611870b669525_9344	40b06fe84ca1b8758d0c3f8a0dea34af_8814	20e8a30293b7b0c63abbc29d0c4c19ee_4348	6db8800965c51df47e711e72bf22185f_4621	0ed7320c6f511ce95f40560feeb5531a_5488	K_pneumoniae_6_01559
WP_004181549.1		glycoside-pentoside-hexuronide family transporter	6	6	1	1	4855				1394	1394	1394	a177eae4552a0a1383f611870b669525_189	40b06fe84ca1b8758d0c3f8a0dea34af_9944	20e8a30293b7b0c63abbc29d0c4c19ee_7458	6db8800965c51df47e711e72bf22185f_7639	0ed7320c6f511ce95f40560feeb5531a_7582	K_pneumoniae_6_03622
WP_043906744.1		hypothetical protein	6	6	1	1	2258				362	362	362	a177eae4552a0a1383f611870b669525_3923	40b06fe84ca1b8758d0c3f8a0dea34af_3320	20e8a30293b7b0c63abbc29d0c4c19ee_31	6db8800965c51df47e711e72bf22185f_6013	0ed7320c6f511ce95f40560feeb5531a_1505	K_pneumoniae_6_00801
group_1832	tssJ	type VI secretion system lipoprotein TssJ	6	6	1	1	4445				533	533	533	a177eae4552a0a1383f611870b669525_1929	40b06fe84ca1b8758d0c3f8a0dea34af_1313	20e8a30293b7b0c63abbc29d0c4c19ee_3630	6db8800965c51df47e711e72bf22185f_3325	0ed7320c6f511ce95f40560feeb5531a_3804	K_pneumoniae_6_02266
sufA		Fe-S cluster assembly scaffold SufA	6	6	1	1	341				377	377	377	a177eae4552a0a1383f611870b669525_4501	40b06fe84ca1b8758d0c3f8a0dea34af_3893	20e8a30293b7b0c63abbc29d0c4c19ee_7792	6db8800965c51df47e711e72bf22185f_7884	0ed7320c6f511ce95f40560feeb5531a_6175	K_pneumoniae_6_03933
menF		isochorismate synthase MenF	6	6	1	1	562				1289	1289	1289	a177eae4552a0a1383f611870b669525_3065	40b06fe84ca1b8758d0c3f8a0dea34af_2539	20e8a30293b7b0c63abbc29d0c4c19ee_810	6db8800965c51df47e711e72bf22185f_1805	0ed7320c6f511ce95f40560feeb5531a_2284	K_pneumoniae_6_01176
WP_004176613.1		DMT family transporter	6	6	1	1	4299				938	938	938	a177eae4552a0a1383f611870b669525_6783	40b06fe84ca1b8758d0c3f8a0dea34af_6251	20e8a30293b7b0c63abbc29d0c4c19ee_5309	6db8800965c51df47e711e72bf22185f_5333	0ed7320c6f511ce95f40560feeb5531a_5812	K_pneumoniae_6_00188
WP_002891903.1		YbaY family lipoprotein	6	6	1	1	1359				491	491	491	a177eae4552a0a1383f611870b669525_8084	40b06fe84ca1b8758d0c3f8a0dea34af_7554	20e8a30293b7b0c63abbc29d0c4c19ee_5942	6db8800965c51df47e711e72bf22185f_405	0ed7320c6f511ce95f40560feeb5531a_405	K_pneumoniae_6_02860
WP_004178427.1		glycoside hydrolase family 43 protein	6	6	1	1	5850				1679	1679	1679	a177eae4552a0a1383f611870b669525_9227	40b06fe84ca1b8758d0c3f8a0dea34af_8697	20e8a30293b7b0c63abbc29d0c4c19ee_4465	6db8800965c51df47e711e72bf22185f_4504	0ed7320c6f511ce95f40560feeb5531a_5605	K_pneumoniae_6_01498
WP_002913338.1		YfcL family protein	6	6	1	1	615				281	281	281	a177eae4552a0a1383f611870b669525_2959	40b06fe84ca1b8758d0c3f8a0dea34af_2433	20e8a30293b7b0c63abbc29d0c4c19ee_916	6db8800965c51df47e711e72bf22185f_1911	0ed7320c6f511ce95f40560feeb5531a_2390	K_pneumoniae_6_01227
WP_002915684.1		decarboxylating cobalt-precorrin-6B (C(15))-methyltransferase	6	6	1	1	4461				569	569	569	a177eae4552a0a1383f611870b669525_1897	40b06fe84ca1b8758d0c3f8a0dea34af_1281	20e8a30293b7b0c63abbc29d0c4c19ee_3662	6db8800965c51df47e711e72bf22185f_3293	0ed7320c6f511ce95f40560feeb5531a_3772	K_pneumoniae_6_02251
WP_231535476.1		amidohydrolase	6	6	1	1	5505				575	641	608	a177eae4552a0a1383f611870b669525_5448	40b06fe84ca1b8758d0c3f8a0dea34af_4683	20e8a30293b7b0c63abbc29d0c4c19ee_3042	6db8800965c51df47e711e72bf22185f_3042	0ed7320c6f511ce95f40560feeb5531a_2884	K_pneumoniae_6_01839
malF		maltose ABC transporter permease MalF	6	6	1	1	179				1544	1544	1544	a177eae4552a0a1383f611870b669525_9808	40b06fe84ca1b8758d0c3f8a0dea34af_9278	20e8a30293b7b0c63abbc29d0c4c19ee_3884	6db8800965c51df47e711e72bf22185f_5085	0ed7320c6f511ce95f40560feeb5531a_5024	K_pneumoniae_6_01781
uspA		universal stress protein UspA	6	6	1	1	3409				437	437	437	a177eae4552a0a1383f611870b669525_516	40b06fe84ca1b8758d0c3f8a0dea34af_10435	20e8a30293b7b0c63abbc29d0c4c19ee_8886	6db8800965c51df47e711e72bf22185f_8957	0ed7320c6f511ce95f40560feeb5531a_9304	K_pneumoniae_6_04590
WP_002896376.1		DUF2593 family protein	6	6	1	1	890				488	488	488	a177eae4552a0a1383f611870b669525_7090	40b06fe84ca1b8758d0c3f8a0dea34af_6560	20e8a30293b7b0c63abbc29d0c4c19ee_2291	6db8800965c51df47e711e72bf22185f_1399	0ed7320c6f511ce95f40560feeb5531a_1399	K_pneumoniae_6_00341
rhmD		L-rhamnonate dehydratase	6	6	1	1	551				1205	1205	1205	a177eae4552a0a1383f611870b669525_3087	40b06fe84ca1b8758d0c3f8a0dea34af_2561	20e8a30293b7b0c63abbc29d0c4c19ee_788	6db8800965c51df47e711e72bf22185f_1783	0ed7320c6f511ce95f40560feeb5531a_2262	K_pneumoniae_6_01165
WP_043906822.1		winged helix-turn-helix domain-containing protein	6	6	1	1	4201				1229	1229	1229	a177eae4552a0a1383f611870b669525_6982	40b06fe84ca1b8758d0c3f8a0dea34af_6452	20e8a30293b7b0c63abbc29d0c4c19ee_5508	6db8800965c51df47e711e72bf22185f_5532	0ed7320c6f511ce95f40560feeb5531a_6011	K_pneumoniae_6_00286
WP_020324851.1		bifunctional 3-(3-hydroxy-phenyl)propionate/3-hydroxycinnamic acid hydroxylase	6	6	1	1	361				1664	1664	1664	a177eae4552a0a1383f611870b669525_4543	40b06fe84ca1b8758d0c3f8a0dea34af_3935	20e8a30293b7b0c63abbc29d0c4c19ee_7750	6db8800965c51df47e711e72bf22185f_7926	0ed7320c6f511ce95f40560feeb5531a_6133	K_pneumoniae_6_03914
WP_004181301.1		fimbrial protein	6	6	1	1	3903				515	515	515	a177eae4552a0a1383f611870b669525_1468	40b06fe84ca1b8758d0c3f8a0dea34af_847	20e8a30293b7b0c63abbc29d0c4c19ee_9629	6db8800965c51df47e711e72bf22185f_9681	0ed7320c6f511ce95f40560feeb5531a_9981	K_pneumoniae_6_04785
dapE		succinyl-diaminopimelate desuccinylase	6	6	1	1	701				1127	1127	1127	a177eae4552a0a1383f611870b669525_2765	40b06fe84ca1b8758d0c3f8a0dea34af_2239	20e8a30293b7b0c63abbc29d0c4c19ee_1110	6db8800965c51df47e711e72bf22185f_2105	0ed7320c6f511ce95f40560feeb5531a_2584	K_pneumoniae_6_01316
yfcG		GSH-dependent disulfide bond oxidoreductase	6	6	1	1	590				629	629	629	a177eae4552a0a1383f611870b669525_3009	40b06fe84ca1b8758d0c3f8a0dea34af_2483	20e8a30293b7b0c63abbc29d0c4c19ee_866	6db8800965c51df47e711e72bf22185f_1861	0ed7320c6f511ce95f40560feeb5531a_2340	K_pneumoniae_6_01204
greA		transcription elongation factor GreA	6	6	1	1	5038				476	476	476	a177eae4552a0a1383f611870b669525_1103	40b06fe84ca1b8758d0c3f8a0dea34af_482	20e8a30293b7b0c63abbc29d0c4c19ee_6217	6db8800965c51df47e711e72bf22185f_6277	0ed7320c6f511ce95f40560feeb5531a_6680	K_pneumoniae_6_03484
WP_004179861.1		MFS transporter	6	6	1	1	5504				629	659	634	a177eae4552a0a1383f611870b669525_5450	40b06fe84ca1b8758d0c3f8a0dea34af_4681	20e8a30293b7b0c63abbc29d0c4c19ee_3044	6db8800965c51df47e711e72bf22185f_3044	0ed7320c6f511ce95f40560feeb5531a_2882	K_pneumoniae_6_01838
kdpE		two-component system response regulator KdpE	6	6	1	1	1062				677	677	677	a177eae4552a0a1383f611870b669525_7458	40b06fe84ca1b8758d0c3f8a0dea34af_6928	20e8a30293b7b0c63abbc29d0c4c19ee_1923	6db8800965c51df47e711e72bf22185f_1031	0ed7320c6f511ce95f40560feeb5531a_1031	K_pneumoniae_6_00518
WP_004175491.1		ABC transporter ATP-binding protein	6	6	1	1	4724				719	719	719	a177eae4552a0a1383f611870b669525_4181	40b06fe84ca1b8758d0c3f8a0dea34af_3576	20e8a30293b7b0c63abbc29d0c4c19ee_9193	6db8800965c51df47e711e72bf22185f_9336	0ed7320c6f511ce95f40560feeb5531a_7822	K_pneumoniae_6_03298
arcA		two-component system response regulator ArcA	6	6	1	1	1767				716	716	716	a177eae4552a0a1383f611870b669525_8932	40b06fe84ca1b8758d0c3f8a0dea34af_8402	20e8a30293b7b0c63abbc29d0c4c19ee_4897	6db8800965c51df47e711e72bf22185f_4072	0ed7320c6f511ce95f40560feeb5531a_4551	K_pneumoniae_6_02626
WP_004179519.1		hypothetical protein	6	6	1	1	3291				899	899	899	a177eae4552a0a1383f611870b669525_6146	40b06fe84ca1b8758d0c3f8a0dea34af_5537	20e8a30293b7b0c63abbc29d0c4c19ee_6710	6db8800965c51df47e711e72bf22185f_6499	0ed7320c6f511ce95f40560feeb5531a_10908	K_pneumoniae_6_03078
menH		2-succinyl-6-hydroxy-2,4-cyclohexadiene-1-carboxylate synthase	6	6	1	1	560				758	758	758	a177eae4552a0a1383f611870b669525_3069	40b06fe84ca1b8758d0c3f8a0dea34af_2543	20e8a30293b7b0c63abbc29d0c4c19ee_806	6db8800965c51df47e711e72bf22185f_1801	0ed7320c6f511ce95f40560feeb5531a_2280	K_pneumoniae_6_01174
hofQ		DNA uptake porin HofQ	6	6	1	1	5214				1247	1247	1247	a177eae4552a0a1383f611870b669525_748	40b06fe84ca1b8758d0c3f8a0dea34af_127	20e8a30293b7b0c63abbc29d0c4c19ee_7162	6db8800965c51df47e711e72bf22185f_7361	0ed7320c6f511ce95f40560feeb5531a_8347	K_pneumoniae_6_04318
pgk		phosphoglycerate kinase	6	6	1	1	4627				1163	1163	1163	a177eae4552a0a1383f611870b669525_1561	40b06fe84ca1b8758d0c3f8a0dea34af_945	20e8a30293b7b0c63abbc29d0c4c19ee_9379	6db8800965c51df47e711e72bf22185f_9464	0ed7320c6f511ce95f40560feeb5531a_9762	K_pneumoniae_6_04669
trmB		tRNA (guanosine(46)-N7)-methyltransferase TrmB	6	6	1	1	3877				719	719	719	a177eae4552a0a1383f611870b669525_1503	40b06fe84ca1b8758d0c3f8a0dea34af_887	20e8a30293b7b0c63abbc29d0c4c19ee_9594	6db8800965c51df47e711e72bf22185f_9716	0ed7320c6f511ce95f40560feeb5531a_10016	K_pneumoniae_6_04769
hpaI		4-hydroxy-2-oxoheptanedioate aldolase	6	6	1	1	1839				797	797	797	a177eae4552a0a1383f611870b669525_9089	40b06fe84ca1b8758d0c3f8a0dea34af_8559	20e8a30293b7b0c63abbc29d0c4c19ee_5054	6db8800965c51df47e711e72bf22185f_3915	0ed7320c6f511ce95f40560feeb5531a_4394	K_pneumoniae_6_02552
astB		N-succinylarginine dihydrolase	6	6	1	1	4098				1340	1340	1340	a177eae4552a0a1383f611870b669525_5936	40b06fe84ca1b8758d0c3f8a0dea34af_4193	20e8a30293b7b0c63abbc29d0c4c19ee_6922	6db8800965c51df47e711e72bf22185f_6978	0ed7320c6f511ce95f40560feeb5531a_7026	K_pneumoniae_6_04084
WP_004179844.1		cupin domain-containing protein	6	6	1	1	32				581	674	612	a177eae4552a0a1383f611870b669525_5480	40b06fe84ca1b8758d0c3f8a0dea34af_4649	20e8a30293b7b0c63abbc29d0c4c19ee_3074	6db8800965c51df47e711e72bf22185f_3074	0ed7320c6f511ce95f40560feeb5531a_2852	K_pneumoniae_6_01824
WP_002914359.1		BON domain-containing protein	6	6	1	1	1985				314	314	314	a177eae4552a0a1383f611870b669525_2261	40b06fe84ca1b8758d0c3f8a0dea34af_1645	20e8a30293b7b0c63abbc29d0c4c19ee_3296	6db8800965c51df47e711e72bf22185f_3657	0ed7320c6f511ce95f40560feeb5531a_4136	K_pneumoniae_6_02425
WP_004179354.1		cupin domain-containing protein	6	6	1	1	5269				362	362	362	a177eae4552a0a1383f611870b669525_6555	40b06fe84ca1b8758d0c3f8a0dea34af_6026	20e8a30293b7b0c63abbc29d0c4c19ee_8737	6db8800965c51df47e711e72bf22185f_8808	0ed7320c6f511ce95f40560feeb5531a_9268	K_pneumoniae_6_00080
ttdA		L(+)-tartrate dehydratase subunit alpha	6	6	1	1	5088				899	899	899	a177eae4552a0a1383f611870b669525_1003	40b06fe84ca1b8758d0c3f8a0dea34af_382	20e8a30293b7b0c63abbc29d0c4c19ee_6317	6db8800965c51df47e711e72bf22185f_6377	0ed7320c6f511ce95f40560feeb5531a_6780	K_pneumoniae_6_03435
trxA		thioredoxin	6	6	1	1	35				323	323	323	a177eae4552a0a1383f611870b669525_5474	40b06fe84ca1b8758d0c3f8a0dea34af_4655	20e8a30293b7b0c63abbc29d0c4c19ee_3068	6db8800965c51df47e711e72bf22185f_3068	0ed7320c6f511ce95f40560feeb5531a_2858	K_pneumoniae_6_01827
hemH		ferrochelatase	6	6	1	1	1317				962	962	962	a177eae4552a0a1383f611870b669525_7996	40b06fe84ca1b8758d0c3f8a0dea34af_7466	20e8a30293b7b0c63abbc29d0c4c19ee_1385	6db8800965c51df47e711e72bf22185f_493	0ed7320c6f511ce95f40560feeb5531a_493	K_pneumoniae_6_00776
WP_002915222.1		glycerate kinase	6	6	1	1	1881				1139	1139	1139	a177eae4552a0a1383f611870b669525_2040	40b06fe84ca1b8758d0c3f8a0dea34af_1424	20e8a30293b7b0c63abbc29d0c4c19ee_3519	6db8800965c51df47e711e72bf22185f_3436	0ed7320c6f511ce95f40560feeb5531a_3915	K_pneumoniae_6_02317
WP_002910832.1		transglutaminase family protein	6	6	1	1	4707				815	815	815	a177eae4552a0a1383f611870b669525_4147	40b06fe84ca1b8758d0c3f8a0dea34af_3542	20e8a30293b7b0c63abbc29d0c4c19ee_9159	6db8800965c51df47e711e72bf22185f_9370	0ed7320c6f511ce95f40560feeb5531a_7856	K_pneumoniae_6_03312
nudB		dihydroneopterin triphosphate diphosphatase	6	6	1	1	5387				443	443	443	a177eae4552a0a1383f611870b669525_3977	40b06fe84ca1b8758d0c3f8a0dea34af_3368	20e8a30293b7b0c63abbc29d0c4c19ee_10515	6db8800965c51df47e711e72bf22185f_10530	0ed7320c6f511ce95f40560feeb5531a_8026	K_pneumoniae_6_03392
argC		N-acetyl-gamma-glutamyl-phosphate reductase	6	6	1	1	3014				1004	1004	1004	a177eae4552a0a1383f611870b669525_10170	40b06fe84ca1b8758d0c3f8a0dea34af_9642	20e8a30293b7b0c63abbc29d0c4c19ee_8546	6db8800965c51df47e711e72bf22185f_8617	0ed7320c6f511ce95f40560feeb5531a_8944	K_pneumoniae_6_04434
WP_002904624.1		hypothetical protein	6	6	1	1	2677				290	290	290	a177eae4552a0a1383f611870b669525_5598	40b06fe84ca1b8758d0c3f8a0dea34af_4531	20e8a30293b7b0c63abbc29d0c4c19ee_10147	6db8800965c51df47e711e72bf22185f_10256	0ed7320c6f511ce95f40560feeb5531a_8639	K_pneumoniae_6_03832
hipB		type II toxin-antitoxin system antitoxin HipB	6	6	1	1	2699				266	287	269	a177eae4552a0a1383f611870b669525_5554	40b06fe84ca1b8758d0c3f8a0dea34af_4575	20e8a30293b7b0c63abbc29d0c4c19ee_10191	6db8800965c51df47e711e72bf22185f_10212	0ed7320c6f511ce95f40560feeb5531a_8683	K_pneumoniae_6_03854
WP_004180755.1		UbiX family flavin prenyltransferase	6	6	1	1	601				584	584	584	a177eae4552a0a1383f611870b669525_2987	40b06fe84ca1b8758d0c3f8a0dea34af_2461	20e8a30293b7b0c63abbc29d0c4c19ee_888	6db8800965c51df47e711e72bf22185f_1883	0ed7320c6f511ce95f40560feeb5531a_2362	K_pneumoniae_6_01213
apaG		Co2+/Mg2+ efflux protein ApaG	6	6	1	1	1729				377	377	377	a177eae4552a0a1383f611870b669525_8853	40b06fe84ca1b8758d0c3f8a0dea34af_8323	20e8a30293b7b0c63abbc29d0c4c19ee_4818	6db8800965c51df47e711e72bf22185f_4151	0ed7320c6f511ce95f40560feeb5531a_4630	K_pneumoniae_6_02662
WP_002210513.1		DeoR/GlpR family DNA-binding transcription regulator	6	6	1	1	3754				761	761	761	a177eae4552a0a1383f611870b669525_5700	40b06fe84ca1b8758d0c3f8a0dea34af_4429	20e8a30293b7b0c63abbc29d0c4c19ee_10287	6db8800965c51df47e711e72bf22185f_10372	0ed7320c6f511ce95f40560feeb5531a_8537	K_pneumoniae_6_03781
WP_004145324.1		alternative ribosome-rescue factor A	6	6	1	1	5136			Hypothetical protein with no hits to refseq/uniprot/clusters/cdd/tigrfams/pfam overlapping another protein with hits	278	278	278	a177eae4552a0a1383f611870b669525_892	40b06fe84ca1b8758d0c3f8a0dea34af_271	20e8a30293b7b0c63abbc29d0c4c19ee_10801	6db8800965c51df47e711e72bf22185f_10886	0ed7320c6f511ce95f40560feeb5531a_10838	K_pneumoniae_6_05166
WP_002909061.1		kinase/pyrophosphorylase	6	6	1	1	317				833	833	833	a177eae4552a0a1383f611870b669525_4450	40b06fe84ca1b8758d0c3f8a0dea34af_3842	20e8a30293b7b0c63abbc29d0c4c19ee_7843	6db8800965c51df47e711e72bf22185f_7833	0ed7320c6f511ce95f40560feeb5531a_6226	K_pneumoniae_6_03956
WP_004174150.1		winged helix-turn-helix transcriptional regulator	6	6	1	1	5029				629	629	629	a177eae4552a0a1383f611870b669525_1124	40b06fe84ca1b8758d0c3f8a0dea34af_503	20e8a30293b7b0c63abbc29d0c4c19ee_6196	6db8800965c51df47e711e72bf22185f_6256	0ed7320c6f511ce95f40560feeb5531a_6659	K_pneumoniae_6_03494
uspC		universal stress protein UspC	6	6	1	1	2315				428	428	428	a177eae4552a0a1383f611870b669525_3807	40b06fe84ca1b8758d0c3f8a0dea34af_3204	20e8a30293b7b0c63abbc29d0c4c19ee_147	6db8800965c51df47e711e72bf22185f_5897	0ed7320c6f511ce95f40560feeb5531a_1621	K_pneumoniae_6_00858
WP_002901633.1		YkgJ family cysteine cluster protein	6	6	1	1	2174				413	413	413	a177eae4552a0a1383f611870b669525_6329	40b06fe84ca1b8758d0c3f8a0dea34af_5720	20e8a30293b7b0c63abbc29d0c4c19ee_6527	6db8800965c51df47e711e72bf22185f_6682	0ed7320c6f511ce95f40560feeb5531a_7322	K_pneumoniae_6_03165
rplL		50S ribosomal protein L7/L12	6	6	1	1	4940				365	365	365	a177eae4552a0a1383f611870b669525_9915	40b06fe84ca1b8758d0c3f8a0dea34af_9387	20e8a30293b7b0c63abbc29d0c4c19ee_10654	6db8800965c51df47e711e72bf22185f_10739	0ed7320c6f511ce95f40560feeb5531a_10691	K_pneumoniae_6_05076
group_1879	bioD	dethiobiotin synthase	6	6	1	1	4181				695	695	695	a177eae4552a0a1383f611870b669525_5774	40b06fe84ca1b8758d0c3f8a0dea34af_4355	20e8a30293b7b0c63abbc29d0c4c19ee_6760	6db8800965c51df47e711e72bf22185f_7140	0ed7320c6f511ce95f40560feeb5531a_6864	K_pneumoniae_6_03748
WP_004217987.1		hypothetical protein	6	6	1	1	3731				107	128	124	a177eae4552a0a1383f611870b669525_5654	40b06fe84ca1b8758d0c3f8a0dea34af_4475	20e8a30293b7b0c63abbc29d0c4c19ee_10333	6db8800965c51df47e711e72bf22185f_10418	0ed7320c6f511ce95f40560feeb5531a_8583	K_pneumoniae_6_03805
pfkA		6-phosphofructokinase	6	6	1	1	3038				962	962	962	a177eae4552a0a1383f611870b669525_10218	40b06fe84ca1b8758d0c3f8a0dea34af_9690	20e8a30293b7b0c63abbc29d0c4c19ee_8498	6db8800965c51df47e711e72bf22185f_8569	0ed7320c6f511ce95f40560feeb5531a_8992	K_pneumoniae_6_04410
nusA		transcription termination factor NusA	6	6	1	1	5026				1487	1487	1487	a177eae4552a0a1383f611870b669525_1133	40b06fe84ca1b8758d0c3f8a0dea34af_512	20e8a30293b7b0c63abbc29d0c4c19ee_6187	6db8800965c51df47e711e72bf22185f_6247	0ed7320c6f511ce95f40560feeb5531a_6650	K_pneumoniae_6_03498
WP_004178464.1		hypothetical protein	6	6	1	1	1877				317	317	317	a177eae4552a0a1383f611870b669525_9165	40b06fe84ca1b8758d0c3f8a0dea34af_8635	20e8a30293b7b0c63abbc29d0c4c19ee_10989	6db8800965c51df47e711e72bf22185f_3839	0ed7320c6f511ce95f40560feeb5531a_4318	K_pneumoniae_6_02514
aas		bifunctional acyl-ACP--phospholipid O-acyltransferase/long-chain-fatty-acid--ACP ligase	6	6	1	1	4512				2159	2159	2159	a177eae4552a0a1383f611870b669525_1794	40b06fe84ca1b8758d0c3f8a0dea34af_1178	20e8a30293b7b0c63abbc29d0c4c19ee_3765	6db8800965c51df47e711e72bf22185f_3190	0ed7320c6f511ce95f40560feeb5531a_3669	K_pneumoniae_6_02201
WP_004179450.1		MFS transporter	6	6	1	1	3203				1310	1310	1310	a177eae4552a0a1383f611870b669525_6311	40b06fe84ca1b8758d0c3f8a0dea34af_5702	20e8a30293b7b0c63abbc29d0c4c19ee_6545	6db8800965c51df47e711e72bf22185f_6664	0ed7320c6f511ce95f40560feeb5531a_7340	K_pneumoniae_6_03156
aegA		formate-dependent uric acid utilization protein AegA	6	6	1	1	698				1982	1982	1982	a177eae4552a0a1383f611870b669525_2773	40b06fe84ca1b8758d0c3f8a0dea34af_2247	20e8a30293b7b0c63abbc29d0c4c19ee_1102	6db8800965c51df47e711e72bf22185f_2097	0ed7320c6f511ce95f40560feeb5531a_2576	K_pneumoniae_6_01313
potC		spermidine/putrescine ABC transporter permease PotC	6	6	1	1	5261				785	785	785	a177eae4552a0a1383f611870b669525_6571	40b06fe84ca1b8758d0c3f8a0dea34af_6042	20e8a30293b7b0c63abbc29d0c4c19ee_8753	6db8800965c51df47e711e72bf22185f_8824	0ed7320c6f511ce95f40560feeb5531a_9284	K_pneumoniae_6_00088
WP_004152758.1		hypothetical protein	6	6	1	1	3098				350	350	350	a177eae4552a0a1383f611870b669525_10873	40b06fe84ca1b8758d0c3f8a0dea34af_10696	20e8a30293b7b0c63abbc29d0c4c19ee_11269	6db8800965c51df47e711e72bf22185f_11278	0ed7320c6f511ce95f40560feeb5531a_11256	K_pneumoniae_6_04665
WP_002923147.1		LysR family transcriptional regulator	6	6	1	1	4888				1226	1226	1226	a177eae4552a0a1383f611870b669525_120	40b06fe84ca1b8758d0c3f8a0dea34af_10013	20e8a30293b7b0c63abbc29d0c4c19ee_7389	6db8800965c51df47e711e72bf22185f_7708	0ed7320c6f511ce95f40560feeb5531a_7513	K_pneumoniae_6_03590
WP_223174961.1		helix-turn-helix transcriptional regulator	6	6	1	1	3773				770	842	782	a177eae4552a0a1383f611870b669525_5738	40b06fe84ca1b8758d0c3f8a0dea34af_4391	20e8a30293b7b0c63abbc29d0c4c19ee_10249	6db8800965c51df47e711e72bf22185f_10334	0ed7320c6f511ce95f40560feeb5531a_8499	K_pneumoniae_6_03766
WP_004179523.1		STAS domain-containing protein	6	6	1	1	3289				338	338	338	a177eae4552a0a1383f611870b669525_6142	40b06fe84ca1b8758d0c3f8a0dea34af_5533	20e8a30293b7b0c63abbc29d0c4c19ee_6714	6db8800965c51df47e711e72bf22185f_6495	0ed7320c6f511ce95f40560feeb5531a_10904	K_pneumoniae_6_03076
nrdA		ribonucleoside-diphosphate reductase subunit alpha	6	6	1	1	542				2285	2285	2285	a177eae4552a0a1383f611870b669525_3107	40b06fe84ca1b8758d0c3f8a0dea34af_2581	20e8a30293b7b0c63abbc29d0c4c19ee_768	6db8800965c51df47e711e72bf22185f_1763	0ed7320c6f511ce95f40560feeb5531a_2242	K_pneumoniae_6_01154
group_1892	lepB	signal peptidase I	6	6	1	1	811				974	974	974	a177eae4552a0a1383f611870b669525_2545	40b06fe84ca1b8758d0c3f8a0dea34af_2015	20e8a30293b7b0c63abbc29d0c4c19ee_1330	6db8800965c51df47e711e72bf22185f_2325	0ed7320c6f511ce95f40560feeb5531a_2804	K_pneumoniae_6_01424
grxC		glutaredoxin 3	6	6	1	1	201				251	251	251	a177eae4552a0a1383f611870b669525_321	40b06fe84ca1b8758d0c3f8a0dea34af_10240	20e8a30293b7b0c63abbc29d0c4c19ee_7590	6db8800965c51df47e711e72bf22185f_7507	0ed7320c6f511ce95f40560feeb5531a_7714	K_pneumoniae_6_03687
nupC		nucleoside permease NupC	6	6	1	1	646				1202	1202	1202	a177eae4552a0a1383f611870b669525_2894	40b06fe84ca1b8758d0c3f8a0dea34af_2368	20e8a30293b7b0c63abbc29d0c4c19ee_981	6db8800965c51df47e711e72bf22185f_1976	0ed7320c6f511ce95f40560feeb5531a_2455	K_pneumoniae_6_01256
ldtD		L,D-transpeptidase	6	6	1	1	4210				1790	1790	1790	a177eae4552a0a1383f611870b669525_6964	40b06fe84ca1b8758d0c3f8a0dea34af_6434	20e8a30293b7b0c63abbc29d0c4c19ee_5490	6db8800965c51df47e711e72bf22185f_5514	0ed7320c6f511ce95f40560feeb5531a_5993	K_pneumoniae_6_00277
yacL		protein YacL	6	6	1	1	1650				362	362	362	a177eae4552a0a1383f611870b669525_8694	40b06fe84ca1b8758d0c3f8a0dea34af_8164	20e8a30293b7b0c63abbc29d0c4c19ee_4659	6db8800965c51df47e711e72bf22185f_4310	0ed7320c6f511ce95f40560feeb5531a_4789	K_pneumoniae_6_02741
WP_004178448.1		nuclear transport factor 2 family protein	6	6	1	1	839				434	434	434	a177eae4552a0a1383f611870b669525_9203	40b06fe84ca1b8758d0c3f8a0dea34af_8673	20e8a30293b7b0c63abbc29d0c4c19ee_10947	6db8800965c51df47e711e72bf22185f_10988	0ed7320c6f511ce95f40560feeb5531a_10996	K_pneumoniae_6_05214
WP_004175940.1		small membrane protein	6	6	1	1	5731				122	122	122	a177eae4552a0a1383f611870b669525_4993	40b06fe84ca1b8758d0c3f8a0dea34af_5138	20e8a30293b7b0c63abbc29d0c4c19ee_2586	6db8800965c51df47e711e72bf22185f_2586	0ed7320c6f511ce95f40560feeb5531a_3340	K_pneumoniae_6_02051
WP_002892258.1		SPFH/Band 7/PHB domain protein	6	6	1	1	1307				917	917	917	a177eae4552a0a1383f611870b669525_7976	40b06fe84ca1b8758d0c3f8a0dea34af_7446	20e8a30293b7b0c63abbc29d0c4c19ee_1405	6db8800965c51df47e711e72bf22185f_513	0ed7320c6f511ce95f40560feeb5531a_513	K_pneumoniae_6_00766
WP_228985764.1		mechanosensitive ion channel family protein	6	11	1.84	1	1182				420	1256	686	a177eae4552a0a1383f611870b669525_7719 a177eae4552a0a1383f611870b669525_7721	40b06fe84ca1b8758d0c3f8a0dea34af_7189 40b06fe84ca1b8758d0c3f8a0dea34af_7191	20e8a30293b7b0c63abbc29d0c4c19ee_1662 20e8a30293b7b0c63abbc29d0c4c19ee_1660	6db8800965c51df47e711e72bf22185f_770 6db8800965c51df47e711e72bf22185f_768	0ed7320c6f511ce95f40560feeb5531a_770 0ed7320c6f511ce95f40560feeb5531a_768	K_pneumoniae_6_00645
WP_016197684.1		dimethyl sulfoxide reductase anchor subunit	6	6	1	1	4184				827	857	843	a177eae4552a0a1383f611870b669525_5768	40b06fe84ca1b8758d0c3f8a0dea34af_4361	20e8a30293b7b0c63abbc29d0c4c19ee_6754	6db8800965c51df47e711e72bf22185f_7146	0ed7320c6f511ce95f40560feeb5531a_6858	K_pneumoniae_6_03751
WP_004176194.1		molecular chaperone	6	6	1	1	2704				695	695	695	a177eae4552a0a1383f611870b669525_5544	40b06fe84ca1b8758d0c3f8a0dea34af_4585	20e8a30293b7b0c63abbc29d0c4c19ee_10201	6db8800965c51df47e711e72bf22185f_10202	0ed7320c6f511ce95f40560feeb5531a_8693	K_pneumoniae_6_03859
WP_004178692.1		alpha-ketoacid dehydrogenase subunit beta	6	6	1	1	1508				1019	1019	1019	a177eae4552a0a1383f611870b669525_8385	40b06fe84ca1b8758d0c3f8a0dea34af_7855	20e8a30293b7b0c63abbc29d0c4c19ee_5641	6db8800965c51df47e711e72bf22185f_104	0ed7320c6f511ce95f40560feeb5531a_104	K_pneumoniae_6_03007
dtpA		dipeptide/tripeptide permease DtpA	6	6	1	1	5783				1505	1505	1505	a177eae4552a0a1383f611870b669525_4891	40b06fe84ca1b8758d0c3f8a0dea34af_5240	20e8a30293b7b0c63abbc29d0c4c19ee_2484	6db8800965c51df47e711e72bf22185f_2484	0ed7320c6f511ce95f40560feeb5531a_3442	K_pneumoniae_6_02101
WP_004148552.1		ABC transporter permease	6	6	1	1	5734				929	929	929	a177eae4552a0a1383f611870b669525_4987	40b06fe84ca1b8758d0c3f8a0dea34af_5144	20e8a30293b7b0c63abbc29d0c4c19ee_2580	6db8800965c51df47e711e72bf22185f_2580	0ed7320c6f511ce95f40560feeb5531a_3346	K_pneumoniae_6_02054
WP_002915104.1		hypothetical protein	6	6	1	1	1908				377	377	377	a177eae4552a0a1383f611870b669525_2094	40b06fe84ca1b8758d0c3f8a0dea34af_1478	20e8a30293b7b0c63abbc29d0c4c19ee_3465	6db8800965c51df47e711e72bf22185f_3490	0ed7320c6f511ce95f40560feeb5531a_3969	K_pneumoniae_6_02344
WP_004175690.1		polyphenol oxidase family protein	6	6	1	1	368				725	725	725	a177eae4552a0a1383f611870b669525_4557	40b06fe84ca1b8758d0c3f8a0dea34af_3949	20e8a30293b7b0c63abbc29d0c4c19ee_7736	6db8800965c51df47e711e72bf22185f_7940	0ed7320c6f511ce95f40560feeb5531a_6119	K_pneumoniae_6_03907
WP_002885023.1		helix-turn-helix transcriptional regulator	6	6	1	1	152				368	368	368	a177eae4552a0a1383f611870b669525_9752	40b06fe84ca1b8758d0c3f8a0dea34af_9222	20e8a30293b7b0c63abbc29d0c4c19ee_3940	6db8800965c51df47e711e72bf22185f_5029	0ed7320c6f511ce95f40560feeb5531a_5080	K_pneumoniae_6_01754
pqiA		membrane integrity-associated transporter subunit PqiA	6	6	1	1	4233				1268	1268	1268	a177eae4552a0a1383f611870b669525_6918	40b06fe84ca1b8758d0c3f8a0dea34af_6388	20e8a30293b7b0c63abbc29d0c4c19ee_5444	6db8800965c51df47e711e72bf22185f_5468	0ed7320c6f511ce95f40560feeb5531a_5947	K_pneumoniae_6_00252
cybC		cytochrome b562	6	6	1	1	5928				386	386	386	a177eae4552a0a1383f611870b669525_9384	40b06fe84ca1b8758d0c3f8a0dea34af_8854	20e8a30293b7b0c63abbc29d0c4c19ee_4308	6db8800965c51df47e711e72bf22185f_4661	0ed7320c6f511ce95f40560feeb5531a_5448	K_pneumoniae_6_01577
rplP		50S ribosomal protein L16	6	6	1	1	5158				410	410	410	a177eae4552a0a1383f611870b669525_848	40b06fe84ca1b8758d0c3f8a0dea34af_227	20e8a30293b7b0c63abbc29d0c4c19ee_10757	6db8800965c51df47e711e72bf22185f_10842	0ed7320c6f511ce95f40560feeb5531a_10794	K_pneumoniae_6_05146
group_191	mqo	malate dehydrogenase (quinone)	6	6	1	1	4158				1610	1655	1631	a177eae4552a0a1383f611870b669525_5816	40b06fe84ca1b8758d0c3f8a0dea34af_4313	20e8a30293b7b0c63abbc29d0c4c19ee_6802	6db8800965c51df47e711e72bf22185f_7098	0ed7320c6f511ce95f40560feeb5531a_6906	K_pneumoniae_6_03728
WP_004179874.1		LysR family transcriptional regulator	6	6	1	1	5513				908	908	908	a177eae4552a0a1383f611870b669525_5432	40b06fe84ca1b8758d0c3f8a0dea34af_4699	20e8a30293b7b0c63abbc29d0c4c19ee_3026	6db8800965c51df47e711e72bf22185f_3026	0ed7320c6f511ce95f40560feeb5531a_2900	K_pneumoniae_6_01845
cmk		(d)CMP kinase	6	6	1	1	4195				683	683	683	a177eae4552a0a1383f611870b669525_6994	40b06fe84ca1b8758d0c3f8a0dea34af_6464	20e8a30293b7b0c63abbc29d0c4c19ee_5520	6db8800965c51df47e711e72bf22185f_5544	0ed7320c6f511ce95f40560feeb5531a_6023	K_pneumoniae_6_00292
tssG		type VI secretion system baseplate subunit TssG	6	6	1	1	4444				1082	1082	1082	a177eae4552a0a1383f611870b669525_1931	40b06fe84ca1b8758d0c3f8a0dea34af_1315	20e8a30293b7b0c63abbc29d0c4c19ee_3628	6db8800965c51df47e711e72bf22185f_3327	0ed7320c6f511ce95f40560feeb5531a_3806	K_pneumoniae_6_02267
dkgA		2,5-didehydrogluconate reductase DkgA	6	6	1	1	3925				827	827	827	a177eae4552a0a1383f611870b669525_1422	40b06fe84ca1b8758d0c3f8a0dea34af_801	20e8a30293b7b0c63abbc29d0c4c19ee_9677	6db8800965c51df47e711e72bf22185f_9635	0ed7320c6f511ce95f40560feeb5531a_9933	K_pneumoniae_6_04808
WP_001251971.1		F0F1 ATP synthase subunit epsilon	6	6	1	1	2937				419	419	419	a177eae4552a0a1383f611870b669525_10384	40b06fe84ca1b8758d0c3f8a0dea34af_9856	20e8a30293b7b0c63abbc29d0c4c19ee_10555	6db8800965c51df47e711e72bf22185f_10640	0ed7320c6f511ce95f40560feeb5531a_10612	K_pneumoniae_6_05056
fabI		enoyl-ACP reductase FabI	6	6	1	1	3240				788	788	788	a177eae4552a0a1383f611870b669525_6236	40b06fe84ca1b8758d0c3f8a0dea34af_5627	20e8a30293b7b0c63abbc29d0c4c19ee_6620	6db8800965c51df47e711e72bf22185f_6589	0ed7320c6f511ce95f40560feeb5531a_7415	K_pneumoniae_6_03121
WP_002903698.1		MFS transporter	6	6	1	1	4178				1250	1250	1250	a177eae4552a0a1383f611870b669525_5780	40b06fe84ca1b8758d0c3f8a0dea34af_4349	20e8a30293b7b0c63abbc29d0c4c19ee_6766	6db8800965c51df47e711e72bf22185f_7134	0ed7320c6f511ce95f40560feeb5531a_6870	K_pneumoniae_6_03745
WP_004140735.1		LpxL/LpxP family Kdo(2)-lipid IV(A) lauroyl/palmitoleoyl acyltransferasee	6	6	1	1	4334				920	920	920	a177eae4552a0a1383f611870b669525_6703	40b06fe84ca1b8758d0c3f8a0dea34af_6174	20e8a30293b7b0c63abbc29d0c4c19ee_5232	6db8800965c51df47e711e72bf22185f_5256	0ed7320c6f511ce95f40560feeb5531a_5735	K_pneumoniae_6_00151
copD		copper homeostasis membrane protein CopD	6	6	1	1	5364				869	869	869	a177eae4552a0a1383f611870b669525_4023	40b06fe84ca1b8758d0c3f8a0dea34af_3414	20e8a30293b7b0c63abbc29d0c4c19ee_10469	6db8800965c51df47e711e72bf22185f_10576	0ed7320c6f511ce95f40560feeb5531a_7980	K_pneumoniae_6_03370
hemG		menaquinone-dependent protoporphyrinogen IX dehydrogenase	6	6	1	1	5205				533	533	533	a177eae4552a0a1383f611870b669525_9962	40b06fe84ca1b8758d0c3f8a0dea34af_9434	20e8a30293b7b0c63abbc29d0c4c19ee_8898	6db8800965c51df47e711e72bf22185f_9138	0ed7320c6f511ce95f40560feeb5531a_9429	K_pneumoniae_6_04444
WP_004148278.1		anion permease	6	6	1	1	4151				1433	1511	1498	a177eae4552a0a1383f611870b669525_5830	40b06fe84ca1b8758d0c3f8a0dea34af_4299	20e8a30293b7b0c63abbc29d0c4c19ee_6816	6db8800965c51df47e711e72bf22185f_7084	0ed7320c6f511ce95f40560feeb5531a_6920	K_pneumoniae_6_03721
WP_004152315.1		LysR family transcriptional regulator	6	6	1	1	4731				899	899	899	a177eae4552a0a1383f611870b669525_4195	40b06fe84ca1b8758d0c3f8a0dea34af_3590	20e8a30293b7b0c63abbc29d0c4c19ee_9207	6db8800965c51df47e711e72bf22185f_9322	0ed7320c6f511ce95f40560feeb5531a_7808	K_pneumoniae_6_03291
WP_002887608.1		PTS sugar transporter subunit IIC	6	6	1	1	1816				779	779	779	a177eae4552a0a1383f611870b669525_9041	40b06fe84ca1b8758d0c3f8a0dea34af_8511	20e8a30293b7b0c63abbc29d0c4c19ee_5006	6db8800965c51df47e711e72bf22185f_3963	0ed7320c6f511ce95f40560feeb5531a_4442	K_pneumoniae_6_02574
trpR		trp operon repressor	6	6	1	1	1775				329	329	329	a177eae4552a0a1383f611870b669525_8948	40b06fe84ca1b8758d0c3f8a0dea34af_8418	20e8a30293b7b0c63abbc29d0c4c19ee_4913	6db8800965c51df47e711e72bf22185f_4056	0ed7320c6f511ce95f40560feeb5531a_4535	K_pneumoniae_6_02618
modF		molybdate ABC transporter ATP-binding protein ModF	6	6	1	1	1015				1472	1472	1472	a177eae4552a0a1383f611870b669525_7341	40b06fe84ca1b8758d0c3f8a0dea34af_6811	20e8a30293b7b0c63abbc29d0c4c19ee_2040	6db8800965c51df47e711e72bf22185f_1148	0ed7320c6f511ce95f40560feeb5531a_1148	K_pneumoniae_6_00465
WP_004181492.1		phosphatase PAP2 family protein	6	6	1	1	3405				1271	1271	1271	a177eae4552a0a1383f611870b669525_508	40b06fe84ca1b8758d0c3f8a0dea34af_10427	20e8a30293b7b0c63abbc29d0c4c19ee_8878	6db8800965c51df47e711e72bf22185f_8949	0ed7320c6f511ce95f40560feeb5531a_9312	K_pneumoniae_6_04586
nirB		nitrite reductase large subunit NirB	6	6	1	1	4645				4067	4067	4067	a177eae4552a0a1383f611870b669525_4301	40b06fe84ca1b8758d0c3f8a0dea34af_3696	20e8a30293b7b0c63abbc29d0c4c19ee_10025	6db8800965c51df47e711e72bf22185f_10153	0ed7320c6f511ce95f40560feeb5531a_6372	K_pneumoniae_6_03241
hisB		bifunctional histidinol-phosphatase/imidazoleglycerol-phosphate dehydratase HisB	6	6	1	1	3685				1067	1067	1067	a177eae4552a0a1383f611870b669525_3441	40b06fe84ca1b8758d0c3f8a0dea34af_2905	20e8a30293b7b0c63abbc29d0c4c19ee_432	6db8800965c51df47e711e72bf22185f_5612	0ed7320c6f511ce95f40560feeb5531a_1906	K_pneumoniae_6_00991
WP_043906912.1		rhodanese family protein	6	6	1	1	2012				545	545	545	a177eae4552a0a1383f611870b669525_2315	40b06fe84ca1b8758d0c3f8a0dea34af_1699	20e8a30293b7b0c63abbc29d0c4c19ee_3242	6db8800965c51df47e711e72bf22185f_3711	0ed7320c6f511ce95f40560feeb5531a_4190	K_pneumoniae_6_02452
WP_004181330.1		DUF1190 family protein	6	6	1	1	3836				671	671	671	a177eae4552a0a1383f611870b669525_1384	40b06fe84ca1b8758d0c3f8a0dea34af_763	20e8a30293b7b0c63abbc29d0c4c19ee_10690	6db8800965c51df47e711e72bf22185f_10794	0ed7320c6f511ce95f40560feeb5531a_10727	K_pneumoniae_6_05114
WP_004174945.1		WbuC family cupin fold metalloprotein	6	6	1	1	629				482	482	482	a177eae4552a0a1383f611870b669525_2928	40b06fe84ca1b8758d0c3f8a0dea34af_2402	20e8a30293b7b0c63abbc29d0c4c19ee_947	6db8800965c51df47e711e72bf22185f_1942	0ed7320c6f511ce95f40560feeb5531a_2421	K_pneumoniae_6_01242
WP_004887037.1		hypothetical protein	6	6	1	1	4132				188	221	193	a177eae4552a0a1383f611870b669525_5868	40b06fe84ca1b8758d0c3f8a0dea34af_4261	20e8a30293b7b0c63abbc29d0c4c19ee_6854	6db8800965c51df47e711e72bf22185f_7046	0ed7320c6f511ce95f40560feeb5531a_6958	K_pneumoniae_6_04116
nepI		purine ribonucleoside efflux pump NepI	6	6	1	1	4813				1193	1193	1193	a177eae4552a0a1383f611870b669525_90	40b06fe84ca1b8758d0c3f8a0dea34af_10043	20e8a30293b7b0c63abbc29d0c4c19ee_9703	6db8800965c51df47e711e72bf22185f_9788	0ed7320c6f511ce95f40560feeb5531a_10203	K_pneumoniae_6_01487
WP_004181311.1		hypothetical protein	6	6	1	1	3908				344	344	344	a177eae4552a0a1383f611870b669525_1458	40b06fe84ca1b8758d0c3f8a0dea34af_837	20e8a30293b7b0c63abbc29d0c4c19ee_9639	6db8800965c51df47e711e72bf22185f_9671	0ed7320c6f511ce95f40560feeb5531a_9971	K_pneumoniae_6_04790
pyrC		dihydroorotase	6	6	1	1	4340				1046	1046	1046	a177eae4552a0a1383f611870b669525_6691	40b06fe84ca1b8758d0c3f8a0dea34af_6162	20e8a30293b7b0c63abbc29d0c4c19ee_5220	6db8800965c51df47e711e72bf22185f_5244	0ed7320c6f511ce95f40560feeb5531a_5723	K_pneumoniae_6_00145
WP_004179443.1		hypothetical protein	6	6	1	1	3199				272	272	272	a177eae4552a0a1383f611870b669525_6319	40b06fe84ca1b8758d0c3f8a0dea34af_5710	20e8a30293b7b0c63abbc29d0c4c19ee_6537	6db8800965c51df47e711e72bf22185f_6672	0ed7320c6f511ce95f40560feeb5531a_7332	K_pneumoniae_6_03160
ssuE		NADPH-dependent FMN reductase	6	6	1	1	4227				575	575	575	a177eae4552a0a1383f611870b669525_6930	40b06fe84ca1b8758d0c3f8a0dea34af_6400	20e8a30293b7b0c63abbc29d0c4c19ee_5456	6db8800965c51df47e711e72bf22185f_5480	0ed7320c6f511ce95f40560feeb5531a_5959	K_pneumoniae_6_00258
WP_002889429.1		YaeP family protein	6	6	1	1	1569				200	200	200	a177eae4552a0a1383f611870b669525_8528	40b06fe84ca1b8758d0c3f8a0dea34af_7998	20e8a30293b7b0c63abbc29d0c4c19ee_4493	6db8800965c51df47e711e72bf22185f_4476	0ed7320c6f511ce95f40560feeb5531a_4955	K_pneumoniae_6_02819
ugpB		sn-glycerol-3-phosphate ABC transporter substrate-binding protein UgpB	6	6	1	1	3552				1316	1316	1316	a177eae4552a0a1383f611870b669525_646	40b06fe84ca1b8758d0c3f8a0dea34af_25	20e8a30293b7b0c63abbc29d0c4c19ee_7264	6db8800965c51df47e711e72bf22185f_7259	0ed7320c6f511ce95f40560feeb5531a_8449	K_pneumoniae_6_04269
ptsI		phosphoenolpyruvate-protein phosphotransferase PtsI	6	6	1	1	659				1727	1727	1727	a177eae4552a0a1383f611870b669525_2853	40b06fe84ca1b8758d0c3f8a0dea34af_2327	20e8a30293b7b0c63abbc29d0c4c19ee_1022	6db8800965c51df47e711e72bf22185f_2017	0ed7320c6f511ce95f40560feeb5531a_2496	K_pneumoniae_6_01274
WP_004179478.1		exoribonuclease II	6	6	1	1	3238				1934	1934	1934	a177eae4552a0a1383f611870b669525_6240	40b06fe84ca1b8758d0c3f8a0dea34af_5631	20e8a30293b7b0c63abbc29d0c4c19ee_6616	6db8800965c51df47e711e72bf22185f_6593	0ed7320c6f511ce95f40560feeb5531a_7411	K_pneumoniae_6_03123
WP_002903955.1		NAD(P)-dependent oxidoreductase	6	6	1	1	3755				902	902	902	a177eae4552a0a1383f611870b669525_5702	40b06fe84ca1b8758d0c3f8a0dea34af_4427	20e8a30293b7b0c63abbc29d0c4c19ee_10285	6db8800965c51df47e711e72bf22185f_10370	0ed7320c6f511ce95f40560feeb5531a_8535	K_pneumoniae_6_03780
WP_032422226.1		YdgA family protein	6	6	1	1	4117				1544	1577	1571	a177eae4552a0a1383f611870b669525_5898	40b06fe84ca1b8758d0c3f8a0dea34af_4231	20e8a30293b7b0c63abbc29d0c4c19ee_6884	6db8800965c51df47e711e72bf22185f_7016	0ed7320c6f511ce95f40560feeb5531a_6988	K_pneumoniae_6_04102
pfkB		6-phosphofructokinase II	6	6	1	1	293				932	932	932	a177eae4552a0a1383f611870b669525_4403	40b06fe84ca1b8758d0c3f8a0dea34af_3795	20e8a30293b7b0c63abbc29d0c4c19ee_7890	6db8800965c51df47e711e72bf22185f_7786	0ed7320c6f511ce95f40560feeb5531a_6273	K_pneumoniae_6_03979
recJ		single-stranded-DNA-specific exonuclease RecJ	6	6	1	1	4595				1733	1733	1733	a177eae4552a0a1383f611870b669525_1628	40b06fe84ca1b8758d0c3f8a0dea34af_1012	20e8a30293b7b0c63abbc29d0c4c19ee_9446	6db8800965c51df47e711e72bf22185f_9531	0ed7320c6f511ce95f40560feeb5531a_9829	K_pneumoniae_6_04701
kdsA		3-deoxy-8-phosphooctulonate synthase	6	6	1	1	4655				854	854	854	a177eae4552a0a1383f611870b669525_4281	40b06fe84ca1b8758d0c3f8a0dea34af_3676	20e8a30293b7b0c63abbc29d0c4c19ee_10045	6db8800965c51df47e711e72bf22185f_10133	0ed7320c6f511ce95f40560feeb5531a_6392	K_pneumoniae_6_03251
rhtA		threonine/homoserine exporter RhtA	6	6	1	1	940				887	887	887	a177eae4552a0a1383f611870b669525_7188	40b06fe84ca1b8758d0c3f8a0dea34af_6658	20e8a30293b7b0c63abbc29d0c4c19ee_2193	6db8800965c51df47e711e72bf22185f_1301	0ed7320c6f511ce95f40560feeb5531a_1301	K_pneumoniae_6_00390
WP_002910898.1		YcgL domain-containing protein	6	6	1	1	4689				281	281	281	a177eae4552a0a1383f611870b669525_4109	40b06fe84ca1b8758d0c3f8a0dea34af_3504	20e8a30293b7b0c63abbc29d0c4c19ee_9121	6db8800965c51df47e711e72bf22185f_9408	0ed7320c6f511ce95f40560feeb5531a_7894	K_pneumoniae_6_03329
WP_043906737.1		hypothetical protein	6	6	1	1	2272				377	377	377	a177eae4552a0a1383f611870b669525_3897	40b06fe84ca1b8758d0c3f8a0dea34af_3294	20e8a30293b7b0c63abbc29d0c4c19ee_57	6db8800965c51df47e711e72bf22185f_5987	0ed7320c6f511ce95f40560feeb5531a_1531	K_pneumoniae_6_00814
WP_004178064.1		DUF945 domain-containing protein	6	6	1	1	3105				821	821	821	a177eae4552a0a1383f611870b669525_10859	40b06fe84ca1b8758d0c3f8a0dea34af_10710	20e8a30293b7b0c63abbc29d0c4c19ee_11137	6db8800965c51df47e711e72bf22185f_9140	0ed7320c6f511ce95f40560feeb5531a_9756	K_pneumoniae_6_04664
araJ		MFS transporter AraJ	6	6	1	1	5664				1154	1154	1154	a177eae4552a0a1383f611870b669525_5125	40b06fe84ca1b8758d0c3f8a0dea34af_5006	20e8a30293b7b0c63abbc29d0c4c19ee_2718	6db8800965c51df47e711e72bf22185f_2718	0ed7320c6f511ce95f40560feeb5531a_3208	K_pneumoniae_6_01988
WP_002883449.1		IMPACT family protein	6	6	1	1	5203				614	614	614	a177eae4552a0a1383f611870b669525_9966	40b06fe84ca1b8758d0c3f8a0dea34af_9438	20e8a30293b7b0c63abbc29d0c4c19ee_8902	6db8800965c51df47e711e72bf22185f_9134	0ed7320c6f511ce95f40560feeb5531a_9433	K_pneumoniae_6_04446
WP_002911541.1		DUF2594 family protein	6	6	1	1	2335				224	224	224	a177eae4552a0a1383f611870b669525_3754	40b06fe84ca1b8758d0c3f8a0dea34af_3151	20e8a30293b7b0c63abbc29d0c4c19ee_200	6db8800965c51df47e711e72bf22185f_5844	0ed7320c6f511ce95f40560feeb5531a_1674	K_pneumoniae_6_00880
WP_004151576.1		O-methyltransferase	6	6	1	1	4086				659	674	671	a177eae4552a0a1383f611870b669525_5960	40b06fe84ca1b8758d0c3f8a0dea34af_4169	20e8a30293b7b0c63abbc29d0c4c19ee_6946	6db8800965c51df47e711e72bf22185f_6954	0ed7320c6f511ce95f40560feeb5531a_7050	K_pneumoniae_6_04073
WP_004146068.1		PTS system mannose/fructose/sorbose family transporter subunit IID	6	6	1	1	1815				851	851	851	a177eae4552a0a1383f611870b669525_9039	40b06fe84ca1b8758d0c3f8a0dea34af_8509	20e8a30293b7b0c63abbc29d0c4c19ee_5004	6db8800965c51df47e711e72bf22185f_3965	0ed7320c6f511ce95f40560feeb5531a_4444	K_pneumoniae_6_02575
WP_002890372.1		PfkB family carbohydrate kinase	6	6	1	1	1426				962	962	962	a177eae4552a0a1383f611870b669525_8220	40b06fe84ca1b8758d0c3f8a0dea34af_7690	20e8a30293b7b0c63abbc29d0c4c19ee_5806	6db8800965c51df47e711e72bf22185f_269	0ed7320c6f511ce95f40560feeb5531a_269	K_pneumoniae_6_02926
WP_004178441.1		DUF2878 domain-containing protein	6	6	1	1	834				485	485	485	a177eae4552a0a1383f611870b669525_9213	40b06fe84ca1b8758d0c3f8a0dea34af_8683	20e8a30293b7b0c63abbc29d0c4c19ee_10957	6db8800965c51df47e711e72bf22185f_10978	0ed7320c6f511ce95f40560feeb5531a_11006	K_pneumoniae_6_05219
thiQ		thiamine ABC transporter ATP-binding protein ThiQ	6	6	1	1	1711				701	701	701	a177eae4552a0a1383f611870b669525_8817	40b06fe84ca1b8758d0c3f8a0dea34af_8287	20e8a30293b7b0c63abbc29d0c4c19ee_4782	6db8800965c51df47e711e72bf22185f_4187	0ed7320c6f511ce95f40560feeb5531a_4666	K_pneumoniae_6_02680
ompX		outer membrane protein OmpX	6	6	1	1	939				512	512	512	a177eae4552a0a1383f611870b669525_7186	40b06fe84ca1b8758d0c3f8a0dea34af_6656	20e8a30293b7b0c63abbc29d0c4c19ee_2195	6db8800965c51df47e711e72bf22185f_1303	0ed7320c6f511ce95f40560feeb5531a_1303	K_pneumoniae_6_00389
nrdR		transcriptional regulator NrdR	6	6	1	1	1410				449	449	449	a177eae4552a0a1383f611870b669525_8186	40b06fe84ca1b8758d0c3f8a0dea34af_7656	20e8a30293b7b0c63abbc29d0c4c19ee_5840	6db8800965c51df47e711e72bf22185f_303	0ed7320c6f511ce95f40560feeb5531a_303	K_pneumoniae_6_02911
WP_004178321.1		hypothetical protein	6	6	1	1	63				365	365	365	a177eae4552a0a1383f611870b669525_9573	40b06fe84ca1b8758d0c3f8a0dea34af_9043	20e8a30293b7b0c63abbc29d0c4c19ee_4119	6db8800965c51df47e711e72bf22185f_4850	0ed7320c6f511ce95f40560feeb5531a_5259	K_pneumoniae_6_01669
group_1957	trxA	thioredoxin TrxA	6	6	1	1	2986				329	329	329	a177eae4552a0a1383f611870b669525_10090	40b06fe84ca1b8758d0c3f8a0dea34af_9562	20e8a30293b7b0c63abbc29d0c4c19ee_9026	6db8800965c51df47e711e72bf22185f_9010	0ed7320c6f511ce95f40560feeb5531a_9557	K_pneumoniae_6_04506
rfaD		ADP-glyceromanno-heptose 6-epimerase	6	6	1	1	209				932	932	932	a177eae4552a0a1383f611870b669525_305	40b06fe84ca1b8758d0c3f8a0dea34af_10224	20e8a30293b7b0c63abbc29d0c4c19ee_7574	6db8800965c51df47e711e72bf22185f_7523	0ed7320c6f511ce95f40560feeb5531a_7698	K_pneumoniae_6_03679
WP_002907733.1		electron transport complex subunit E	6	6	1	1	5780				698	698	698	a177eae4552a0a1383f611870b669525_4895	40b06fe84ca1b8758d0c3f8a0dea34af_5236	20e8a30293b7b0c63abbc29d0c4c19ee_2488	6db8800965c51df47e711e72bf22185f_2488	0ed7320c6f511ce95f40560feeb5531a_3438	K_pneumoniae_6_02098
WP_029505571.1		zinc-dependent alcohol dehydrogenase family protein	6	6	1	1	4067				950	983	977	a177eae4552a0a1383f611870b669525_5998	40b06fe84ca1b8758d0c3f8a0dea34af_4129	20e8a30293b7b0c63abbc29d0c4c19ee_6984	6db8800965c51df47e711e72bf22185f_6916	0ed7320c6f511ce95f40560feeb5531a_7088	K_pneumoniae_6_04054
WP_002895757.1		transketolase family protein	6	6	1	1	954				992	992	992	a177eae4552a0a1383f611870b669525_7216	40b06fe84ca1b8758d0c3f8a0dea34af_6686	20e8a30293b7b0c63abbc29d0c4c19ee_2165	6db8800965c51df47e711e72bf22185f_1273	0ed7320c6f511ce95f40560feeb5531a_1273	K_pneumoniae_6_00404
manX		PTS mannose transporter subunit IIAB	6	6	1	1	246				971	971	971	a177eae4552a0a1383f611870b669525_4077	40b06fe84ca1b8758d0c3f8a0dea34af_3472	20e8a30293b7b0c63abbc29d0c4c19ee_9089	6db8800965c51df47e711e72bf22185f_9440	0ed7320c6f511ce95f40560feeb5531a_7926	K_pneumoniae_6_03346
yccX		acylphosphatase	6	6	1	1	4258				281	281	281	a177eae4552a0a1383f611870b669525_6868	40b06fe84ca1b8758d0c3f8a0dea34af_6338	20e8a30293b7b0c63abbc29d0c4c19ee_5394	6db8800965c51df47e711e72bf22185f_5418	0ed7320c6f511ce95f40560feeb5531a_5897	K_pneumoniae_6_00228
WP_004178884.1		type II toxin-antitoxin system HigB family toxin	6	6	1	1	1241				302	302	302	a177eae4552a0a1383f611870b669525_7837	40b06fe84ca1b8758d0c3f8a0dea34af_7307	20e8a30293b7b0c63abbc29d0c4c19ee_1544	6db8800965c51df47e711e72bf22185f_652	0ed7320c6f511ce95f40560feeb5531a_652	K_pneumoniae_6_00704
WP_002903700.1		LysR family transcriptional regulator	6	6	1	1	4179				902	902	902	a177eae4552a0a1383f611870b669525_5778	40b06fe84ca1b8758d0c3f8a0dea34af_4351	20e8a30293b7b0c63abbc29d0c4c19ee_6764	6db8800965c51df47e711e72bf22185f_7136	0ed7320c6f511ce95f40560feeb5531a_6868	K_pneumoniae_6_03746
WP_004143365.1		VOC family protein	6	6	1	1	388				392	392	392	a177eae4552a0a1383f611870b669525_4597	40b06fe84ca1b8758d0c3f8a0dea34af_3989	20e8a30293b7b0c63abbc29d0c4c19ee_7696	6db8800965c51df47e711e72bf22185f_7980	0ed7320c6f511ce95f40560feeb5531a_6079	K_pneumoniae_6_03887
WP_043906798.1		YdiY family protein	6	6	1	1	294				758	758	758	a177eae4552a0a1383f611870b669525_4405	40b06fe84ca1b8758d0c3f8a0dea34af_3797	20e8a30293b7b0c63abbc29d0c4c19ee_7888	6db8800965c51df47e711e72bf22185f_7788	0ed7320c6f511ce95f40560feeb5531a_6271	K_pneumoniae_6_03978
rpiB		ribose 5-phosphate isomerase B	6	6	1	1	4394				458	458	458	a177eae4552a0a1383f611870b669525_6583	40b06fe84ca1b8758d0c3f8a0dea34af_6054	20e8a30293b7b0c63abbc29d0c4c19ee_5112	6db8800965c51df47e711e72bf22185f_5136	0ed7320c6f511ce95f40560feeb5531a_5615	K_pneumoniae_6_00094
WP_002898200.1		MBL fold metallo-hydrolase	6	6	1	1	4212				647	647	647	a177eae4552a0a1383f611870b669525_6960	40b06fe84ca1b8758d0c3f8a0dea34af_6430	20e8a30293b7b0c63abbc29d0c4c19ee_5486	6db8800965c51df47e711e72bf22185f_5510	0ed7320c6f511ce95f40560feeb5531a_5989	K_pneumoniae_6_00274
ilvD		dihydroxy-acid dehydratase	6	6	1	1	2998				1850	1850	1850	a177eae4552a0a1383f611870b669525_10114	40b06fe84ca1b8758d0c3f8a0dea34af_9586	20e8a30293b7b0c63abbc29d0c4c19ee_9050	6db8800965c51df47e711e72bf22185f_8986	0ed7320c6f511ce95f40560feeb5531a_9581	K_pneumoniae_6_04518
WP_023304711.1		ATP-binding protein	6	6	1	1	3288				455	470	467	a177eae4552a0a1383f611870b669525_6140	40b06fe84ca1b8758d0c3f8a0dea34af_5531	20e8a30293b7b0c63abbc29d0c4c19ee_6716	6db8800965c51df47e711e72bf22185f_6493	0ed7320c6f511ce95f40560feeb5531a_10902	K_pneumoniae_6_03075
phnE		phosphonate ABC transporter, permease protein PhnE	6	6	1	1	1494				884	884	884	a177eae4552a0a1383f611870b669525_8354	40b06fe84ca1b8758d0c3f8a0dea34af_7824	20e8a30293b7b0c63abbc29d0c4c19ee_5672	6db8800965c51df47e711e72bf22185f_135	0ed7320c6f511ce95f40560feeb5531a_135	K_pneumoniae_6_02992
pspA		phage shock protein PspA	6	6	1	1	3254				668	668	668	a177eae4552a0a1383f611870b669525_6208	40b06fe84ca1b8758d0c3f8a0dea34af_5599	20e8a30293b7b0c63abbc29d0c4c19ee_6648	6db8800965c51df47e711e72bf22185f_6561	0ed7320c6f511ce95f40560feeb5531a_7443	K_pneumoniae_6_03107
soxR		redox-sensitive transcriptional activator SoxR	6	6	1	1	137				458	458	458	a177eae4552a0a1383f611870b669525_9722	40b06fe84ca1b8758d0c3f8a0dea34af_9192	20e8a30293b7b0c63abbc29d0c4c19ee_3970	6db8800965c51df47e711e72bf22185f_4999	0ed7320c6f511ce95f40560feeb5531a_5110	K_pneumoniae_6_01740
WP_004176252.1		GNAT family N-acetyltransferase	6	6	1	1	3747				440	440	440	a177eae4552a0a1383f611870b669525_5686	40b06fe84ca1b8758d0c3f8a0dea34af_4443	20e8a30293b7b0c63abbc29d0c4c19ee_10301	6db8800965c51df47e711e72bf22185f_10386	0ed7320c6f511ce95f40560feeb5531a_8551	K_pneumoniae_6_03788
folM		dihydromonapterin reductase	6	6	1	1	4126				722	722	722	a177eae4552a0a1383f611870b669525_5880	40b06fe84ca1b8758d0c3f8a0dea34af_4249	20e8a30293b7b0c63abbc29d0c4c19ee_6866	6db8800965c51df47e711e72bf22185f_7034	0ed7320c6f511ce95f40560feeb5531a_6970	K_pneumoniae_6_04111
msrA		peptide-methionine (S)-S-oxide reductase MsrA	6	6	1	1	5987				638	638	638	a177eae4552a0a1383f611870b669525_9418	40b06fe84ca1b8758d0c3f8a0dea34af_8888	20e8a30293b7b0c63abbc29d0c4c19ee_4274	6db8800965c51df47e711e72bf22185f_4695	0ed7320c6f511ce95f40560feeb5531a_5414	K_pneumoniae_6_01593
WP_002913605.1		hypothetical protein	6	6	1	1	661				239	239	239	a177eae4552a0a1383f611870b669525_2849	40b06fe84ca1b8758d0c3f8a0dea34af_2323	20e8a30293b7b0c63abbc29d0c4c19ee_1026	6db8800965c51df47e711e72bf22185f_2021	0ed7320c6f511ce95f40560feeb5531a_2500	K_pneumoniae_6_01276
WP_002908376.1		basic amino acid ABC transporter substrate-binding protein	6	6	1	1	384				767	767	767	a177eae4552a0a1383f611870b669525_4589	40b06fe84ca1b8758d0c3f8a0dea34af_3981	20e8a30293b7b0c63abbc29d0c4c19ee_7704	6db8800965c51df47e711e72bf22185f_7972	0ed7320c6f511ce95f40560feeb5531a_6087	K_pneumoniae_6_03891
yigB		5-amino-6-(5-phospho-D-ribitylamino)uracil phosphatase YigB	6	6	1	1	5172				716	716	716	a177eae4552a0a1383f611870b669525_10028	40b06fe84ca1b8758d0c3f8a0dea34af_9500	20e8a30293b7b0c63abbc29d0c4c19ee_8964	6db8800965c51df47e711e72bf22185f_9072	0ed7320c6f511ce95f40560feeb5531a_9495	K_pneumoniae_6_04477
rhaA		L-rhamnose isomerase	6	6	1	1	3049				1259	1259	1259	a177eae4552a0a1383f611870b669525_10240	40b06fe84ca1b8758d0c3f8a0dea34af_9712	20e8a30293b7b0c63abbc29d0c4c19ee_8476	6db8800965c51df47e711e72bf22185f_8547	0ed7320c6f511ce95f40560feeb5531a_9014	K_pneumoniae_6_04399
group_198		OpgC domain-containing protein	6	6	1	1	3292				656	851	817	a177eae4552a0a1383f611870b669525_6148	40b06fe84ca1b8758d0c3f8a0dea34af_5539	20e8a30293b7b0c63abbc29d0c4c19ee_6708	6db8800965c51df47e711e72bf22185f_6501	0ed7320c6f511ce95f40560feeb5531a_10910	K_pneumoniae_6_03079
WP_004150939.1		OB-fold putative lipoprotein	6	6	1	1	4995				464	464	464	a177eae4552a0a1383f611870b669525_1196	40b06fe84ca1b8758d0c3f8a0dea34af_575	20e8a30293b7b0c63abbc29d0c4c19ee_6124	6db8800965c51df47e711e72bf22185f_6184	0ed7320c6f511ce95f40560feeb5531a_6587	K_pneumoniae_6_03529
WP_004174935.1		thiamine pyrophosphate-binding protein	6	6	1	1	642				1661	1661	1661	a177eae4552a0a1383f611870b669525_2902	40b06fe84ca1b8758d0c3f8a0dea34af_2376	20e8a30293b7b0c63abbc29d0c4c19ee_973	6db8800965c51df47e711e72bf22185f_1968	0ed7320c6f511ce95f40560feeb5531a_2447	K_pneumoniae_6_01252
WP_004178063.1		transglycosylase SLT domain-containing protein	6	6	1	1	3107				485	485	485	a177eae4552a0a1383f611870b669525_10855	40b06fe84ca1b8758d0c3f8a0dea34af_10714	20e8a30293b7b0c63abbc29d0c4c19ee_11141	6db8800965c51df47e711e72bf22185f_9144	0ed7320c6f511ce95f40560feeb5531a_9752	K_pneumoniae_6_04663
WP_004178910.1		ABC transporter permease	6	6	1	1	1207				953	953	953	a177eae4552a0a1383f611870b669525_7771	40b06fe84ca1b8758d0c3f8a0dea34af_7241	20e8a30293b7b0c63abbc29d0c4c19ee_1610	6db8800965c51df47e711e72bf22185f_718	0ed7320c6f511ce95f40560feeb5531a_718	K_pneumoniae_6_00670
rmuC		DNA recombination protein RmuC	6	6	1	1	5189				1448	1448	1448	a177eae4552a0a1383f611870b669525_9994	40b06fe84ca1b8758d0c3f8a0dea34af_9466	20e8a30293b7b0c63abbc29d0c4c19ee_8930	6db8800965c51df47e711e72bf22185f_9106	0ed7320c6f511ce95f40560feeb5531a_9461	K_pneumoniae_6_04460
cydB		cytochrome d ubiquinol oxidase subunit II	6	6	1	1	5287				1010	1010	1010	a177eae4552a0a1383f611870b669525_6519	40b06fe84ca1b8758d0c3f8a0dea34af_5990	20e8a30293b7b0c63abbc29d0c4c19ee_8701	6db8800965c51df47e711e72bf22185f_8772	0ed7320c6f511ce95f40560feeb5531a_9232	K_pneumoniae_6_00063
phoH		phosphate starvation-inducible protein PhoH	6	6	1	1	4316				788	788	788	a177eae4552a0a1383f611870b669525_6749	40b06fe84ca1b8758d0c3f8a0dea34af_6217	20e8a30293b7b0c63abbc29d0c4c19ee_5275	6db8800965c51df47e711e72bf22185f_5299	0ed7320c6f511ce95f40560feeb5531a_5778	K_pneumoniae_6_00171
WP_002888448.1		glucose uptake inhibitor SgrT	6	6	1	1	1707				152	152	152	a177eae4552a0a1383f611870b669525_8808	40b06fe84ca1b8758d0c3f8a0dea34af_8278	20e8a30293b7b0c63abbc29d0c4c19ee_4773	6db8800965c51df47e711e72bf22185f_4196	0ed7320c6f511ce95f40560feeb5531a_4675	K_pneumoniae_6_02684
WP_002916131.1		DUF1471 domain-containing protein	6	6	1	1	4549				209	209	209	a177eae4552a0a1383f611870b669525_1718	40b06fe84ca1b8758d0c3f8a0dea34af_1102	20e8a30293b7b0c63abbc29d0c4c19ee_9538	6db8800965c51df47e711e72bf22185f_9623	0ed7320c6f511ce95f40560feeb5531a_9921	K_pneumoniae_6_04745
WP_004179307.1		pirin family protein	6	6	1	1	4320				860	860	860	a177eae4552a0a1383f611870b669525_6737	40b06fe84ca1b8758d0c3f8a0dea34af_6208	20e8a30293b7b0c63abbc29d0c4c19ee_5266	6db8800965c51df47e711e72bf22185f_5290	0ed7320c6f511ce95f40560feeb5531a_5769	K_pneumoniae_6_00166
arnA		bifunctional UDP-4-amino-4-deoxy-L-arabinose formyltransferase/UDP-glucuronic acid oxidase ArnA	6	6	1	1	3438				1985	1985	1985	a177eae4552a0a1383f611870b669525_582	40b06fe84ca1b8758d0c3f8a0dea34af_10501	20e8a30293b7b0c63abbc29d0c4c19ee_7326	6db8800965c51df47e711e72bf22185f_7197	0ed7320c6f511ce95f40560feeb5531a_10421	K_pneumoniae_6_04960
WP_002913439.1		bile acid:sodium symporter	6	6	1	1	652				998	998	998	a177eae4552a0a1383f611870b669525_2867	40b06fe84ca1b8758d0c3f8a0dea34af_2341	20e8a30293b7b0c63abbc29d0c4c19ee_1008	6db8800965c51df47e711e72bf22185f_2003	0ed7320c6f511ce95f40560feeb5531a_2482	K_pneumoniae_6_01267
nfsA		nitroreductase NfsA	6	6	1	1	897				722	722	722	a177eae4552a0a1383f611870b669525_7104	40b06fe84ca1b8758d0c3f8a0dea34af_6574	20e8a30293b7b0c63abbc29d0c4c19ee_2277	6db8800965c51df47e711e72bf22185f_1385	0ed7320c6f511ce95f40560feeb5531a_1385	K_pneumoniae_6_00348
WP_004176906.1		ABC transporter permease	6	6	1	1	1147				998	998	998	a177eae4552a0a1383f611870b669525_7649	40b06fe84ca1b8758d0c3f8a0dea34af_7119	20e8a30293b7b0c63abbc29d0c4c19ee_1732	6db8800965c51df47e711e72bf22185f_840	0ed7320c6f511ce95f40560feeb5531a_840	K_pneumoniae_6_00610
WP_002917678.1		glycerol dehydratase reactivase beta/small subunit family protein	6	6	1	1	4950				353	353	353	a177eae4552a0a1383f611870b669525_1288	40b06fe84ca1b8758d0c3f8a0dea34af_667	20e8a30293b7b0c63abbc29d0c4c19ee_6032	6db8800965c51df47e711e72bf22185f_6092	0ed7320c6f511ce95f40560feeb5531a_6495	K_pneumoniae_6_03574
dinI		DNA damage-inducible protein I	6	6	1	1	4339				251	251	251	a177eae4552a0a1383f611870b669525_6693	40b06fe84ca1b8758d0c3f8a0dea34af_6164	20e8a30293b7b0c63abbc29d0c4c19ee_5222	6db8800965c51df47e711e72bf22185f_5246	0ed7320c6f511ce95f40560feeb5531a_5725	K_pneumoniae_6_00146
WP_004178916.1		ABC transporter ATP-binding protein	6	6	1	1	1204				1010	1010	1010	a177eae4552a0a1383f611870b669525_7765	40b06fe84ca1b8758d0c3f8a0dea34af_7235	20e8a30293b7b0c63abbc29d0c4c19ee_1616	6db8800965c51df47e711e72bf22185f_724	0ed7320c6f511ce95f40560feeb5531a_724	K_pneumoniae_6_00667
WP_001096398.1		VirB3 family type IV secretion system protein	6	6	1	1	2817				2738	2738	2738	a177eae4552a0a1383f611870b669525_3598	40b06fe84ca1b8758d0c3f8a0dea34af_3028	20e8a30293b7b0c63abbc29d0c4c19ee_323	6db8800965c51df47e711e72bf22185f_5721	0ed7320c6f511ce95f40560feeb5531a_1797	K_pneumoniae_6_00938
raiA		ribosome-associated translation inhibitor RaiA	6	6	1	1	2069				335	335	335	a177eae4552a0a1383f611870b669525_2433	40b06fe84ca1b8758d0c3f8a0dea34af_1817	20e8a30293b7b0c63abbc29d0c4c19ee_3124	6db8800965c51df47e711e72bf22185f_3829	0ed7320c6f511ce95f40560feeb5531a_4308	K_pneumoniae_6_02509
WP_002915108.1		protein-L-isoaspartate(D-aspartate) O-methyltransferase	6	6	1	1	1905				626	626	626	a177eae4552a0a1383f611870b669525_2088	40b06fe84ca1b8758d0c3f8a0dea34af_1472	20e8a30293b7b0c63abbc29d0c4c19ee_3471	6db8800965c51df47e711e72bf22185f_3484	0ed7320c6f511ce95f40560feeb5531a_3963	K_pneumoniae_6_02341
WP_223174975.1		IS1 family transposase	6	12	2	1	3155				185	275	224	a177eae4552a0a1383f611870b669525_10500 a177eae4552a0a1383f611870b669525_10636 a177eae4552a0a1383f611870b669525_10762	40b06fe84ca1b8758d0c3f8a0dea34af_10562 40b06fe84ca1b8758d0c3f8a0dea34af_10806	20e8a30293b7b0c63abbc29d0c4c19ee_9340 20e8a30293b7b0c63abbc29d0c4c19ee_9313	6db8800965c51df47e711e72bf22185f_9263 6db8800965c51df47e711e72bf22185f_9236	0ed7320c6f511ce95f40560feeb5531a_9632 0ed7320c6f511ce95f40560feeb5531a_9660	K_pneumoniae_6_04249
WP_004190569.1		alpha/beta hydrolase	6	6	1	1	3271				1058	1136	1123	a177eae4552a0a1383f611870b669525_6172	40b06fe84ca1b8758d0c3f8a0dea34af_5563	20e8a30293b7b0c63abbc29d0c4c19ee_6684	6db8800965c51df47e711e72bf22185f_6525	0ed7320c6f511ce95f40560feeb5531a_7479	K_pneumoniae_6_03090
WP_004177241.1		beta-galactosidase	6	6	1	1	1344				2057	2057	2057	a177eae4552a0a1383f611870b669525_8051	40b06fe84ca1b8758d0c3f8a0dea34af_7521	20e8a30293b7b0c63abbc29d0c4c19ee_5975	6db8800965c51df47e711e72bf22185f_438	0ed7320c6f511ce95f40560feeb5531a_438	K_pneumoniae_6_02844
ulaR		HTH-type transcriptional regulator UlaR	6	6	1	1	5957				755	755	755	a177eae4552a0a1383f611870b669525_9478	40b06fe84ca1b8758d0c3f8a0dea34af_8948	20e8a30293b7b0c63abbc29d0c4c19ee_4214	6db8800965c51df47e711e72bf22185f_4755	0ed7320c6f511ce95f40560feeb5531a_5354	K_pneumoniae_6_01623
ompA		porin OmpA	6	6	1	1	4240				1070	1070	1070	a177eae4552a0a1383f611870b669525_6904	40b06fe84ca1b8758d0c3f8a0dea34af_6374	20e8a30293b7b0c63abbc29d0c4c19ee_5430	6db8800965c51df47e711e72bf22185f_5454	0ed7320c6f511ce95f40560feeb5531a_5933	K_pneumoniae_6_00246
ppnN		nucleotide 5'-monophosphate nucleosidase PpnN	6	6	1	1	4405				1367	1367	1367	a177eae4552a0a1383f611870b669525_2022	40b06fe84ca1b8758d0c3f8a0dea34af_1406	20e8a30293b7b0c63abbc29d0c4c19ee_3537	6db8800965c51df47e711e72bf22185f_3418	0ed7320c6f511ce95f40560feeb5531a_3897	K_pneumoniae_6_02308
pyrD		quinone-dependent dihydroorotate dehydrogenase	6	6	1	1	4228				1010	1010	1010	a177eae4552a0a1383f611870b669525_6928	40b06fe84ca1b8758d0c3f8a0dea34af_6398	20e8a30293b7b0c63abbc29d0c4c19ee_5454	6db8800965c51df47e711e72bf22185f_5478	0ed7320c6f511ce95f40560feeb5531a_5957	K_pneumoniae_6_00257
WP_004180429.1		CoA pyrophosphatase	6	6	1	1	242				578	578	578	a177eae4552a0a1383f611870b669525_4085	40b06fe84ca1b8758d0c3f8a0dea34af_3480	20e8a30293b7b0c63abbc29d0c4c19ee_9097	6db8800965c51df47e711e72bf22185f_9432	0ed7320c6f511ce95f40560feeb5531a_7918	K_pneumoniae_6_03342
ybaK		Cys-tRNA(Pro)/Cys-tRNA(Cys) deacylase YbaK	6	6	1	1	1312				479	479	479	a177eae4552a0a1383f611870b669525_7986	40b06fe84ca1b8758d0c3f8a0dea34af_7456	20e8a30293b7b0c63abbc29d0c4c19ee_1395	6db8800965c51df47e711e72bf22185f_503	0ed7320c6f511ce95f40560feeb5531a_503	K_pneumoniae_6_00771
crl		sigma factor-binding protein Crl	6	6	1	1	1527				398	398	398	a177eae4552a0a1383f611870b669525_8423	40b06fe84ca1b8758d0c3f8a0dea34af_7893	20e8a30293b7b0c63abbc29d0c4c19ee_5603	6db8800965c51df47e711e72bf22185f_66	0ed7320c6f511ce95f40560feeb5531a_66	K_pneumoniae_6_03026
ilvA		threonine ammonia-lyase, biosynthetic	6	6	1	1	2997				1544	1544	1544	a177eae4552a0a1383f611870b669525_10112	40b06fe84ca1b8758d0c3f8a0dea34af_9584	20e8a30293b7b0c63abbc29d0c4c19ee_9048	6db8800965c51df47e711e72bf22185f_8988	0ed7320c6f511ce95f40560feeb5531a_9579	K_pneumoniae_6_04517
WP_002901632.1		envelope biogenesis factor ElyC	6	6	1	1	2175				743	743	743	a177eae4552a0a1383f611870b669525_6331	40b06fe84ca1b8758d0c3f8a0dea34af_5722	20e8a30293b7b0c63abbc29d0c4c19ee_6525	6db8800965c51df47e711e72bf22185f_6684	0ed7320c6f511ce95f40560feeb5531a_7320	K_pneumoniae_6_03166
WP_032422291.1		LysR substrate-binding domain-containing protein	6	6	1	1	3260				854	899	866	a177eae4552a0a1383f611870b669525_6196	40b06fe84ca1b8758d0c3f8a0dea34af_5587	20e8a30293b7b0c63abbc29d0c4c19ee_6660	6db8800965c51df47e711e72bf22185f_6549	0ed7320c6f511ce95f40560feeb5531a_7455	K_pneumoniae_6_03101
WP_004180986.1		AzlC family ABC transporter permease	6	6	1	1	1996				746	746	746	a177eae4552a0a1383f611870b669525_2283	40b06fe84ca1b8758d0c3f8a0dea34af_1667	20e8a30293b7b0c63abbc29d0c4c19ee_3274	6db8800965c51df47e711e72bf22185f_3679	0ed7320c6f511ce95f40560feeb5531a_4158	K_pneumoniae_6_02436
WP_002901080.1		DUF441 domain-containing protein	6	6	1	1	5349				446	446	446	a177eae4552a0a1383f611870b669525_6473	40b06fe84ca1b8758d0c3f8a0dea34af_5864	20e8a30293b7b0c63abbc29d0c4c19ee_8575	6db8800965c51df47e711e72bf22185f_8646	0ed7320c6f511ce95f40560feeb5531a_9106	K_pneumoniae_6_00004
WP_002885086.1		CidA/LrgA family protein	6	6	1	1	132				407	407	407	a177eae4552a0a1383f611870b669525_9712	40b06fe84ca1b8758d0c3f8a0dea34af_9182	20e8a30293b7b0c63abbc29d0c4c19ee_3980	6db8800965c51df47e711e72bf22185f_4989	0ed7320c6f511ce95f40560feeb5531a_5120	K_pneumoniae_6_01735
paaZ		phenylacetic acid degradation bifunctional protein PaaZ	6	6	1	1	4069				2045	2045	2045	a177eae4552a0a1383f611870b669525_5994	40b06fe84ca1b8758d0c3f8a0dea34af_4133	20e8a30293b7b0c63abbc29d0c4c19ee_6980	6db8800965c51df47e711e72bf22185f_6920	0ed7320c6f511ce95f40560feeb5531a_7084	K_pneumoniae_6_04056
WP_002922936.1		sulfate ABC transporter substrate-binding protein	6	6	1	1	4844				989	989	989	a177eae4552a0a1383f611870b669525_211	40b06fe84ca1b8758d0c3f8a0dea34af_9922	20e8a30293b7b0c63abbc29d0c4c19ee_7480	6db8800965c51df47e711e72bf22185f_7617	0ed7320c6f511ce95f40560feeb5531a_7604	K_pneumoniae_6_03633
WP_004178569.1		DUF805 domain-containing protein	6	6	1	1	1740				365	365	365	a177eae4552a0a1383f611870b669525_8875	40b06fe84ca1b8758d0c3f8a0dea34af_8345	20e8a30293b7b0c63abbc29d0c4c19ee_4840	6db8800965c51df47e711e72bf22185f_4129	0ed7320c6f511ce95f40560feeb5531a_4608	K_pneumoniae_6_02651
phnC		phosphonate ABC transporter ATP-binding protein	6	6	1	1	1491				842	842	842	a177eae4552a0a1383f611870b669525_8348	40b06fe84ca1b8758d0c3f8a0dea34af_7818	20e8a30293b7b0c63abbc29d0c4c19ee_5678	6db8800965c51df47e711e72bf22185f_141	0ed7320c6f511ce95f40560feeb5531a_141	K_pneumoniae_6_02989
WP_004179388.1		hypothetical protein	6	6	1	1	2232				311	311	311	a177eae4552a0a1383f611870b669525_6447	40b06fe84ca1b8758d0c3f8a0dea34af_5838	20e8a30293b7b0c63abbc29d0c4c19ee_6409	6db8800965c51df47e711e72bf22185f_6800	0ed7320c6f511ce95f40560feeb5531a_7204	K_pneumoniae_6_03223
zinT		metal-binding protein ZinT	6	6	1	1	3017				650	650	650	a177eae4552a0a1383f611870b669525_10176	40b06fe84ca1b8758d0c3f8a0dea34af_9648	20e8a30293b7b0c63abbc29d0c4c19ee_8540	6db8800965c51df47e711e72bf22185f_8611	0ed7320c6f511ce95f40560feeb5531a_8950	K_pneumoniae_6_04431
WP_004151733.1		sel1 repeat family protein	6	6	1	1	120				686	686	686	a177eae4552a0a1383f611870b669525_9688	40b06fe84ca1b8758d0c3f8a0dea34af_9158	20e8a30293b7b0c63abbc29d0c4c19ee_4004	6db8800965c51df47e711e72bf22185f_4965	0ed7320c6f511ce95f40560feeb5531a_5144	K_pneumoniae_6_01724
WP_020324868.1		cytosine permease	6	6	1	1	3242				1379	1430	1387	a177eae4552a0a1383f611870b669525_6232	40b06fe84ca1b8758d0c3f8a0dea34af_5623	20e8a30293b7b0c63abbc29d0c4c19ee_6624	6db8800965c51df47e711e72bf22185f_6585	0ed7320c6f511ce95f40560feeb5531a_7419	K_pneumoniae_6_03119
WP_002914199.1		LysR family transcriptional regulator	6	6	1	1	2037				911	911	911	a177eae4552a0a1383f611870b669525_2365	40b06fe84ca1b8758d0c3f8a0dea34af_1749	20e8a30293b7b0c63abbc29d0c4c19ee_3192	6db8800965c51df47e711e72bf22185f_3761	0ed7320c6f511ce95f40560feeb5531a_4240	K_pneumoniae_6_02477
yceG		cell division protein YceG	6	6	1	1	4361				1022	1022	1022	a177eae4552a0a1383f611870b669525_6649	40b06fe84ca1b8758d0c3f8a0dea34af_6120	20e8a30293b7b0c63abbc29d0c4c19ee_5178	6db8800965c51df47e711e72bf22185f_5202	0ed7320c6f511ce95f40560feeb5531a_5681	K_pneumoniae_6_00124
WP_004146520.1		DUF413 domain-containing protein	6	6	1	1	3003				338	338	338	a177eae4552a0a1383f611870b669525_10126	40b06fe84ca1b8758d0c3f8a0dea34af_9598	20e8a30293b7b0c63abbc29d0c4c19ee_9062	6db8800965c51df47e711e72bf22185f_8974	0ed7320c6f511ce95f40560feeb5531a_9593	K_pneumoniae_6_04523
WP_002898602.1		hypothetical protein	6	6	1	1	4291				221	221	221	a177eae4552a0a1383f611870b669525_6799	40b06fe84ca1b8758d0c3f8a0dea34af_6267	20e8a30293b7b0c63abbc29d0c4c19ee_5325	6db8800965c51df47e711e72bf22185f_5349	0ed7320c6f511ce95f40560feeb5531a_5828	K_pneumoniae_6_00194
pyrG		CTP synthase (glutamine hydrolyzing)	6	6	1	1	1886				1637	1637	1637	a177eae4552a0a1383f611870b669525_2050	40b06fe84ca1b8758d0c3f8a0dea34af_1434	20e8a30293b7b0c63abbc29d0c4c19ee_3509	6db8800965c51df47e711e72bf22185f_3446	0ed7320c6f511ce95f40560feeb5531a_3925	K_pneumoniae_6_02322
WP_004179947.1		amino acid ABC transporter ATP-binding protein	6	6	1	1	5560				737	737	737	a177eae4552a0a1383f611870b669525_5338	40b06fe84ca1b8758d0c3f8a0dea34af_4793	20e8a30293b7b0c63abbc29d0c4c19ee_2932	6db8800965c51df47e711e72bf22185f_2932	0ed7320c6f511ce95f40560feeb5531a_2994	K_pneumoniae_6_01890
htpX		protease HtpX	6	6	1	1	258				884	884	884	a177eae4552a0a1383f611870b669525_4049	40b06fe84ca1b8758d0c3f8a0dea34af_3440	20e8a30293b7b0c63abbc29d0c4c19ee_10443	6db8800965c51df47e711e72bf22185f_10602	0ed7320c6f511ce95f40560feeb5531a_7954	K_pneumoniae_6_03358
WP_002888827.1		ABC transporter permease	6	6	1	1	1638				770	770	770	a177eae4552a0a1383f611870b669525_8668	40b06fe84ca1b8758d0c3f8a0dea34af_8138	20e8a30293b7b0c63abbc29d0c4c19ee_4633	6db8800965c51df47e711e72bf22185f_4336	0ed7320c6f511ce95f40560feeb5531a_4815	K_pneumoniae_6_02752
WP_004180630.1		DUF418 family protein	6	6	1	1	491				1157	1157	1157	a177eae4552a0a1383f611870b669525_3212	40b06fe84ca1b8758d0c3f8a0dea34af_2686	20e8a30293b7b0c63abbc29d0c4c19ee_663	6db8800965c51df47e711e72bf22185f_1658	0ed7320c6f511ce95f40560feeb5531a_2137	K_pneumoniae_6_01102
hypD		hydrogenase formation protein HypD	6	6	1	1	1945				1121	1121	1121	a177eae4552a0a1383f611870b669525_2168	40b06fe84ca1b8758d0c3f8a0dea34af_1552	20e8a30293b7b0c63abbc29d0c4c19ee_3391	6db8800965c51df47e711e72bf22185f_3564	0ed7320c6f511ce95f40560feeb5531a_4043	K_pneumoniae_6_02380
sohB		protease SohB	6	6	1	1	3223				1046	1082	1052	a177eae4552a0a1383f611870b669525_6270	40b06fe84ca1b8758d0c3f8a0dea34af_5661	20e8a30293b7b0c63abbc29d0c4c19ee_6586	6db8800965c51df47e711e72bf22185f_6623	0ed7320c6f511ce95f40560feeb5531a_7381	K_pneumoniae_6_03138
ftsA		cell division protein FtsA	6	6	1	1	1677				1262	1262	1262	a177eae4552a0a1383f611870b669525_8748	40b06fe84ca1b8758d0c3f8a0dea34af_8218	20e8a30293b7b0c63abbc29d0c4c19ee_4713	6db8800965c51df47e711e72bf22185f_4256	0ed7320c6f511ce95f40560feeb5531a_4735	K_pneumoniae_6_02714
macA		macrolide transporter subunit MacA	6	6	1	1	868				1115	1115	1115	a177eae4552a0a1383f611870b669525_7046	40b06fe84ca1b8758d0c3f8a0dea34af_6516	20e8a30293b7b0c63abbc29d0c4c19ee_10859	6db8800965c51df47e711e72bf22185f_1443	0ed7320c6f511ce95f40560feeb5531a_1443	K_pneumoniae_6_00318
WP_004174442.1		SDR family oxidoreductase	6	6	1	1	4610				743	743	743	a177eae4552a0a1383f611870b669525_1598	40b06fe84ca1b8758d0c3f8a0dea34af_982	20e8a30293b7b0c63abbc29d0c4c19ee_9416	6db8800965c51df47e711e72bf22185f_9501	0ed7320c6f511ce95f40560feeb5531a_9799	K_pneumoniae_6_04686
WP_004179737.1		nuclear transport factor 2 family protein	6	6	1	1	3774				386	386	386	a177eae4552a0a1383f611870b669525_5740	40b06fe84ca1b8758d0c3f8a0dea34af_4389	20e8a30293b7b0c63abbc29d0c4c19ee_10247	6db8800965c51df47e711e72bf22185f_10332	0ed7320c6f511ce95f40560feeb5531a_8497	K_pneumoniae_6_03765
WP_004179234.1		glycosyltransferase	6	6	1	1	4252				3134	3134	3134	a177eae4552a0a1383f611870b669525_6880	40b06fe84ca1b8758d0c3f8a0dea34af_6350	20e8a30293b7b0c63abbc29d0c4c19ee_5406	6db8800965c51df47e711e72bf22185f_5430	0ed7320c6f511ce95f40560feeb5531a_5909	K_pneumoniae_6_00234
WP_002922459.1		divergent polysaccharide deacetylase family protein	6	6	1	1	205				947	947	947	a177eae4552a0a1383f611870b669525_313	40b06fe84ca1b8758d0c3f8a0dea34af_10232	20e8a30293b7b0c63abbc29d0c4c19ee_7582	6db8800965c51df47e711e72bf22185f_7515	0ed7320c6f511ce95f40560feeb5531a_7706	K_pneumoniae_6_03683
ulaA		PTS ascorbate transporter subunit IIC	6	6	1	1	5959				1400	1400	1400	a177eae4552a0a1383f611870b669525_9474	40b06fe84ca1b8758d0c3f8a0dea34af_8944	20e8a30293b7b0c63abbc29d0c4c19ee_4218	6db8800965c51df47e711e72bf22185f_4751	0ed7320c6f511ce95f40560feeb5531a_5358	K_pneumoniae_6_01621
WP_002910885.1		potassium/proton antiporter	6	6	1	1	4700				1733	1733	1733	a177eae4552a0a1383f611870b669525_4131	40b06fe84ca1b8758d0c3f8a0dea34af_3526	20e8a30293b7b0c63abbc29d0c4c19ee_9143	6db8800965c51df47e711e72bf22185f_9386	0ed7320c6f511ce95f40560feeb5531a_7872	K_pneumoniae_6_03319
WP_002912756.1		DUF1456 family protein	6	6	1	1	462				470	470	470	a177eae4552a0a1383f611870b669525_3268	40b06fe84ca1b8758d0c3f8a0dea34af_2744	20e8a30293b7b0c63abbc29d0c4c19ee_607	6db8800965c51df47e711e72bf22185f_1602	0ed7320c6f511ce95f40560feeb5531a_2081	K_pneumoniae_6_01074
uspG		universal stress protein UspG	6	6	1	1	1117				428	428	428	a177eae4552a0a1383f611870b669525_7589	40b06fe84ca1b8758d0c3f8a0dea34af_7059	20e8a30293b7b0c63abbc29d0c4c19ee_1792	6db8800965c51df47e711e72bf22185f_900	0ed7320c6f511ce95f40560feeb5531a_900	K_pneumoniae_6_00580
WP_004196459.1		YciK family oxidoreductase	6	6	1	1	3221				761	800	767	a177eae4552a0a1383f611870b669525_6274	40b06fe84ca1b8758d0c3f8a0dea34af_5665	20e8a30293b7b0c63abbc29d0c4c19ee_6582	6db8800965c51df47e711e72bf22185f_6627	0ed7320c6f511ce95f40560feeb5531a_7377	K_pneumoniae_6_03139
rpmI		50S ribosomal protein L35	6	6	1	1	298				197	197	197	a177eae4552a0a1383f611870b669525_4413	40b06fe84ca1b8758d0c3f8a0dea34af_3805	20e8a30293b7b0c63abbc29d0c4c19ee_7880	6db8800965c51df47e711e72bf22185f_7796	0ed7320c6f511ce95f40560feeb5531a_6263	K_pneumoniae_6_03974
mhpB		3-carboxyethylcatechol 2,3-dioxygenase	6	6	1	1	362				944	944	944	a177eae4552a0a1383f611870b669525_4545	40b06fe84ca1b8758d0c3f8a0dea34af_3937	20e8a30293b7b0c63abbc29d0c4c19ee_7748	6db8800965c51df47e711e72bf22185f_7928	0ed7320c6f511ce95f40560feeb5531a_6131	K_pneumoniae_6_03913
nadR		multifunctional transcriptional regulator/nicotinamide-nucleotide adenylyltransferase/ribosylnicotinamide kinase NadR	6	6	1	1	1778				1232	1232	1232	a177eae4552a0a1383f611870b669525_8954	40b06fe84ca1b8758d0c3f8a0dea34af_8424	20e8a30293b7b0c63abbc29d0c4c19ee_4919	6db8800965c51df47e711e72bf22185f_4050	0ed7320c6f511ce95f40560feeb5531a_4529	K_pneumoniae_6_02615
hpxE		molybdenum cofactor-independent xanthine hydroxylase subunit HpxE	6	6	1	1	2692				974	974	974	a177eae4552a0a1383f611870b669525_5568	40b06fe84ca1b8758d0c3f8a0dea34af_4561	20e8a30293b7b0c63abbc29d0c4c19ee_10177	6db8800965c51df47e711e72bf22185f_10226	0ed7320c6f511ce95f40560feeb5531a_8669	K_pneumoniae_6_03847
pheS		phenylalanine--tRNA ligase subunit alpha	6	6	1	1	301				983	983	983	a177eae4552a0a1383f611870b669525_4420	40b06fe84ca1b8758d0c3f8a0dea34af_3812	20e8a30293b7b0c63abbc29d0c4c19ee_7873	6db8800965c51df47e711e72bf22185f_7803	0ed7320c6f511ce95f40560feeb5531a_6256	K_pneumoniae_6_03972
WP_002885079.1		NCS2 family permease	6	6	1	1	135				1349	1349	1349	a177eae4552a0a1383f611870b669525_9718	40b06fe84ca1b8758d0c3f8a0dea34af_9188	20e8a30293b7b0c63abbc29d0c4c19ee_3974	6db8800965c51df47e711e72bf22185f_4995	0ed7320c6f511ce95f40560feeb5531a_5114	K_pneumoniae_6_01738
WP_004148803.1		ATP-binding cassette domain-containing protein	6	6	1	1	4723				875	875	875	a177eae4552a0a1383f611870b669525_4179	40b06fe84ca1b8758d0c3f8a0dea34af_3574	20e8a30293b7b0c63abbc29d0c4c19ee_9191	6db8800965c51df47e711e72bf22185f_9338	0ed7320c6f511ce95f40560feeb5531a_7824	K_pneumoniae_6_03299
WP_004180331.1		acyl-CoA/acyl-ACP dehydrogenase	6	6	1	1	373				1133	1133	1133	a177eae4552a0a1383f611870b669525_4567	40b06fe84ca1b8758d0c3f8a0dea34af_3959	20e8a30293b7b0c63abbc29d0c4c19ee_7726	6db8800965c51df47e711e72bf22185f_7950	0ed7320c6f511ce95f40560feeb5531a_6109	K_pneumoniae_6_03902
gspJ		type II secretion system minor pseudopilin GspJ	6	6	1	1	1620				596	596	596	a177eae4552a0a1383f611870b669525_8632	40b06fe84ca1b8758d0c3f8a0dea34af_8102	20e8a30293b7b0c63abbc29d0c4c19ee_4597	6db8800965c51df47e711e72bf22185f_4372	0ed7320c6f511ce95f40560feeb5531a_4851	K_pneumoniae_6_02770
WP_002923156.1		PTS cellobiose transporter subunit IIC	6	6	1	1	4893				1322	1322	1322	a177eae4552a0a1383f611870b669525_110	40b06fe84ca1b8758d0c3f8a0dea34af_10023	20e8a30293b7b0c63abbc29d0c4c19ee_7379	6db8800965c51df47e711e72bf22185f_7718	0ed7320c6f511ce95f40560feeb5531a_7503	K_pneumoniae_6_03584
WP_071527864.1		hypothetical protein	6	6	1	1	3218				140	233	217	a177eae4552a0a1383f611870b669525_6280	40b06fe84ca1b8758d0c3f8a0dea34af_5671	20e8a30293b7b0c63abbc29d0c4c19ee_6576	6db8800965c51df47e711e72bf22185f_6633	0ed7320c6f511ce95f40560feeb5531a_7371	K_pneumoniae_6_03142
WP_004183208.1		Rpn family recombination-promoting nuclease/putative transposase	6	6	1	1	1327				899	899	899	a177eae4552a0a1383f611870b669525_8017	40b06fe84ca1b8758d0c3f8a0dea34af_7487	20e8a30293b7b0c63abbc29d0c4c19ee_1364	6db8800965c51df47e711e72bf22185f_472	0ed7320c6f511ce95f40560feeb5531a_472	K_pneumoniae_6_00786
rseB		sigma-E factor regulatory protein RseB	6	6	1	1	2088				956	956	956	a177eae4552a0a1383f611870b669525_2483	40b06fe84ca1b8758d0c3f8a0dea34af_1867	20e8a30293b7b0c63abbc29d0c4c19ee_9864	6db8800965c51df47e711e72bf22185f_9949	0ed7320c6f511ce95f40560feeb5531a_10247	K_pneumoniae_6_04889
WP_000079398.1		sugar ABC transporter permease	6	6	1	1	1346				851	851	851	a177eae4552a0a1383f611870b669525_8055	40b06fe84ca1b8758d0c3f8a0dea34af_7525	20e8a30293b7b0c63abbc29d0c4c19ee_5971	6db8800965c51df47e711e72bf22185f_434	0ed7320c6f511ce95f40560feeb5531a_434	K_pneumoniae_6_02846
nuoE		NADH-quinone oxidoreductase subunit NuoE	6	6	1	1	574				500	500	500	a177eae4552a0a1383f611870b669525_3041	40b06fe84ca1b8758d0c3f8a0dea34af_2515	20e8a30293b7b0c63abbc29d0c4c19ee_834	6db8800965c51df47e711e72bf22185f_1829	0ed7320c6f511ce95f40560feeb5531a_2308	K_pneumoniae_6_01188
rsmI		16S rRNA (cytidine(1402)-2'-O)-methyltransferase	6	6	1	1	5003				863	863	863	a177eae4552a0a1383f611870b669525_1181	40b06fe84ca1b8758d0c3f8a0dea34af_560	20e8a30293b7b0c63abbc29d0c4c19ee_6139	6db8800965c51df47e711e72bf22185f_6199	0ed7320c6f511ce95f40560feeb5531a_6602	K_pneumoniae_6_03521
WP_004175561.1		ABC transporter substrate-binding protein	6	6	1	1	4648				1256	1256	1256	a177eae4552a0a1383f611870b669525_4295	40b06fe84ca1b8758d0c3f8a0dea34af_3690	20e8a30293b7b0c63abbc29d0c4c19ee_10031	6db8800965c51df47e711e72bf22185f_10147	0ed7320c6f511ce95f40560feeb5531a_6378	K_pneumoniae_6_03244
eutQ		ethanolamine utilization acetate kinase EutQ	6	6	1	1	690				689	689	689	a177eae4552a0a1383f611870b669525_2789	40b06fe84ca1b8758d0c3f8a0dea34af_2263	20e8a30293b7b0c63abbc29d0c4c19ee_1086	6db8800965c51df47e711e72bf22185f_2081	0ed7320c6f511ce95f40560feeb5531a_2560	K_pneumoniae_6_01305
rodZ		cytoskeleton protein RodZ	6	6	1	1	765				995	995	995	a177eae4552a0a1383f611870b669525_2637	40b06fe84ca1b8758d0c3f8a0dea34af_2111	20e8a30293b7b0c63abbc29d0c4c19ee_1238	6db8800965c51df47e711e72bf22185f_2233	0ed7320c6f511ce95f40560feeb5531a_2712	K_pneumoniae_6_01378
ybiJ		DUF1471 family protein YbiJ	6	6	1	1	950				260	260	260	a177eae4552a0a1383f611870b669525_7208	40b06fe84ca1b8758d0c3f8a0dea34af_6678	20e8a30293b7b0c63abbc29d0c4c19ee_2173	6db8800965c51df47e711e72bf22185f_1281	0ed7320c6f511ce95f40560feeb5531a_1281	K_pneumoniae_6_00400
frsA		esterase FrsA	6	6	1	1	1528				1244	1244	1244	a177eae4552a0a1383f611870b669525_8425	40b06fe84ca1b8758d0c3f8a0dea34af_7895	20e8a30293b7b0c63abbc29d0c4c19ee_5601	6db8800965c51df47e711e72bf22185f_64	0ed7320c6f511ce95f40560feeb5531a_64	K_pneumoniae_6_03027
WP_004190748.1		PAAR domain-containing protein	6	6	1	1	3217				473	506	500	a177eae4552a0a1383f611870b669525_6282	40b06fe84ca1b8758d0c3f8a0dea34af_5673	20e8a30293b7b0c63abbc29d0c4c19ee_6574	6db8800965c51df47e711e72bf22185f_6635	0ed7320c6f511ce95f40560feeb5531a_7369	K_pneumoniae_6_03143
rho		transcription termination factor Rho	6	6	1	1	2985				1259	1259	1259	a177eae4552a0a1383f611870b669525_10088	40b06fe84ca1b8758d0c3f8a0dea34af_9560	20e8a30293b7b0c63abbc29d0c4c19ee_9024	6db8800965c51df47e711e72bf22185f_9012	0ed7320c6f511ce95f40560feeb5531a_9555	K_pneumoniae_6_04505
WP_004179131.1		aspartate:alanine antiporter	6	6	1	1	901				1685	1685	1685	a177eae4552a0a1383f611870b669525_7112	40b06fe84ca1b8758d0c3f8a0dea34af_6582	20e8a30293b7b0c63abbc29d0c4c19ee_2269	6db8800965c51df47e711e72bf22185f_1377	0ed7320c6f511ce95f40560feeb5531a_1377	K_pneumoniae_6_00352
WP_004178717.1		branched-chain amino acid ABC transporter permease	6	6	1	1	1477				1049	1049	1049	a177eae4552a0a1383f611870b669525_8320	40b06fe84ca1b8758d0c3f8a0dea34af_7790	20e8a30293b7b0c63abbc29d0c4c19ee_5706	6db8800965c51df47e711e72bf22185f_169	0ed7320c6f511ce95f40560feeb5531a_169	K_pneumoniae_6_02975
kpnF		multidrug efflux SMR transporter subunit KpnF	6	6	1	1	4170				329	329	329	a177eae4552a0a1383f611870b669525_5792	40b06fe84ca1b8758d0c3f8a0dea34af_4337	20e8a30293b7b0c63abbc29d0c4c19ee_6778	6db8800965c51df47e711e72bf22185f_7122	0ed7320c6f511ce95f40560feeb5531a_6882	K_pneumoniae_6_03740
WP_004149825.1		PLP-dependent aminotransferase family protein	6	6	1	1	3910				1181	1181	1181	a177eae4552a0a1383f611870b669525_1454	40b06fe84ca1b8758d0c3f8a0dea34af_833	20e8a30293b7b0c63abbc29d0c4c19ee_9643	6db8800965c51df47e711e72bf22185f_9667	0ed7320c6f511ce95f40560feeb5531a_9967	K_pneumoniae_6_04793
WP_004151219.1		MsnO8 family LLM class oxidoreductase	6	6	1	1	5708				1007	1007	1007	a177eae4552a0a1383f611870b669525_5041	40b06fe84ca1b8758d0c3f8a0dea34af_5090	20e8a30293b7b0c63abbc29d0c4c19ee_2634	6db8800965c51df47e711e72bf22185f_2634	0ed7320c6f511ce95f40560feeb5531a_3292	K_pneumoniae_6_02031
WP_004177540.1		YfaZ family outer membrane protein	6	6	1	1	1849				545	545	545	a177eae4552a0a1383f611870b669525_9109	40b06fe84ca1b8758d0c3f8a0dea34af_8579	20e8a30293b7b0c63abbc29d0c4c19ee_5074	6db8800965c51df47e711e72bf22185f_3895	0ed7320c6f511ce95f40560feeb5531a_4374	K_pneumoniae_6_02542
WP_002895084.1		YbgS-like family protein	6	6	1	1	1022				365	365	365	a177eae4552a0a1383f611870b669525_7355	40b06fe84ca1b8758d0c3f8a0dea34af_6825	20e8a30293b7b0c63abbc29d0c4c19ee_2026	6db8800965c51df47e711e72bf22185f_1134	0ed7320c6f511ce95f40560feeb5531a_1134	K_pneumoniae_6_00472
WP_004179490.1		YcjF family protein	6	6	1	1	3259				1061	1061	1061	a177eae4552a0a1383f611870b669525_6198	40b06fe84ca1b8758d0c3f8a0dea34af_5589	20e8a30293b7b0c63abbc29d0c4c19ee_6658	6db8800965c51df47e711e72bf22185f_6551	0ed7320c6f511ce95f40560feeb5531a_7453	K_pneumoniae_6_03102
panE		2-dehydropantoate 2-reductase	6	6	1	1	1397				911	911	911	a177eae4552a0a1383f611870b669525_8160	40b06fe84ca1b8758d0c3f8a0dea34af_7630	20e8a30293b7b0c63abbc29d0c4c19ee_5866	6db8800965c51df47e711e72bf22185f_329	0ed7320c6f511ce95f40560feeb5531a_329	K_pneumoniae_6_02898
yciA		acyl-CoA thioester hydrolase YciA	6	6	1	1	2178				365	398	392	a177eae4552a0a1383f611870b669525_6337	40b06fe84ca1b8758d0c3f8a0dea34af_5728	20e8a30293b7b0c63abbc29d0c4c19ee_6519	6db8800965c51df47e711e72bf22185f_6690	0ed7320c6f511ce95f40560feeb5531a_7314	K_pneumoniae_6_03169
mtnC		acireductone synthase	6	6	1	1	1125				689	689	689	a177eae4552a0a1383f611870b669525_7605	40b06fe84ca1b8758d0c3f8a0dea34af_7075	20e8a30293b7b0c63abbc29d0c4c19ee_1776	6db8800965c51df47e711e72bf22185f_884	0ed7320c6f511ce95f40560feeb5531a_884	K_pneumoniae_6_00588
WP_004180145.1		benzoate/H(+) symporter BenE family transporter	6	6	1	1	5746				1166	1166	1166	a177eae4552a0a1383f611870b669525_4963	40b06fe84ca1b8758d0c3f8a0dea34af_5168	20e8a30293b7b0c63abbc29d0c4c19ee_2556	6db8800965c51df47e711e72bf22185f_2556	0ed7320c6f511ce95f40560feeb5531a_3370	K_pneumoniae_6_02065
gpt		xanthine phosphoribosyltransferase	6	6	1	1	1529				458	458	458	a177eae4552a0a1383f611870b669525_8427	40b06fe84ca1b8758d0c3f8a0dea34af_7897	20e8a30293b7b0c63abbc29d0c4c19ee_5599	6db8800965c51df47e711e72bf22185f_62	0ed7320c6f511ce95f40560feeb5531a_62	K_pneumoniae_6_03028
WP_004178068.1		DUF3560 domain-containing protein	6	6	1	1	2539				1355	1355	1355	a177eae4552a0a1383f611870b669525_10899	40b06fe84ca1b8758d0c3f8a0dea34af_10866	20e8a30293b7b0c63abbc29d0c4c19ee_11029	6db8800965c51df47e711e72bf22185f_11056	0ed7320c6f511ce95f40560feeb5531a_11056	K_pneumoniae_6_05323
glk		glucokinase	6	6	1	1	640				965	965	965	a177eae4552a0a1383f611870b669525_2906	40b06fe84ca1b8758d0c3f8a0dea34af_2380	20e8a30293b7b0c63abbc29d0c4c19ee_969	6db8800965c51df47e711e72bf22185f_1964	0ed7320c6f511ce95f40560feeb5531a_2443	K_pneumoniae_6_01250
livG		high-affinity branched-chain amino acid ABC transporter ATP-binding protein LivG	6	6	1	1	3556				767	767	767	a177eae4552a0a1383f611870b669525_638	40b06fe84ca1b8758d0c3f8a0dea34af_17	20e8a30293b7b0c63abbc29d0c4c19ee_7272	6db8800965c51df47e711e72bf22185f_7251	0ed7320c6f511ce95f40560feeb5531a_8457	K_pneumoniae_6_04265
cpxA		envelope stress sensor histidine kinase CpxA	6	6	1	1	3042				1373	1373	1373	a177eae4552a0a1383f611870b669525_10226	40b06fe84ca1b8758d0c3f8a0dea34af_9698	20e8a30293b7b0c63abbc29d0c4c19ee_8490	6db8800965c51df47e711e72bf22185f_8561	0ed7320c6f511ce95f40560feeb5531a_9000	K_pneumoniae_6_04406
fetB		iron export ABC transporter permease subunit FetB	6	6	1	1	1305				782	782	782	a177eae4552a0a1383f611870b669525_7972	40b06fe84ca1b8758d0c3f8a0dea34af_7442	20e8a30293b7b0c63abbc29d0c4c19ee_1409	6db8800965c51df47e711e72bf22185f_517	0ed7320c6f511ce95f40560feeb5531a_517	K_pneumoniae_6_00764
WP_002915099.1		UbiX family flavin prenyltransferase	6	6	1	1	1912				593	593	593	a177eae4552a0a1383f611870b669525_2102	40b06fe84ca1b8758d0c3f8a0dea34af_1486	20e8a30293b7b0c63abbc29d0c4c19ee_3457	6db8800965c51df47e711e72bf22185f_3498	0ed7320c6f511ce95f40560feeb5531a_3977	K_pneumoniae_6_02348
hpf		ribosome hibernation promoting factor	6	6	1	1	5060				287	287	287	a177eae4552a0a1383f611870b669525_1059	40b06fe84ca1b8758d0c3f8a0dea34af_438	20e8a30293b7b0c63abbc29d0c4c19ee_6261	6db8800965c51df47e711e72bf22185f_6321	0ed7320c6f511ce95f40560feeb5531a_6724	K_pneumoniae_6_03462
WP_014343000.1		DUF488 family protein	6	6	1	1	5344				338	356	341	a177eae4552a0a1383f611870b669525_6483	40b06fe84ca1b8758d0c3f8a0dea34af_5874	20e8a30293b7b0c63abbc29d0c4c19ee_8585	6db8800965c51df47e711e72bf22185f_8656	0ed7320c6f511ce95f40560feeb5531a_9116	K_pneumoniae_6_00009
rnhA		ribonuclease HI	6	6	1	1	1549				467	467	467	a177eae4552a0a1383f611870b669525_8470	40b06fe84ca1b8758d0c3f8a0dea34af_7940	20e8a30293b7b0c63abbc29d0c4c19ee_5556	6db8800965c51df47e711e72bf22185f_19	0ed7320c6f511ce95f40560feeb5531a_19	K_pneumoniae_6_03049
rpoE		RNA polymerase sigma factor RpoE	6	6	1	1	2086				575	575	575	a177eae4552a0a1383f611870b669525_2479	40b06fe84ca1b8758d0c3f8a0dea34af_1863	20e8a30293b7b0c63abbc29d0c4c19ee_9860	6db8800965c51df47e711e72bf22185f_9945	0ed7320c6f511ce95f40560feeb5531a_10243	K_pneumoniae_6_04887
WP_004178881.1		arylsulfatase	6	6	1	1	1246				1733	1733	1733	a177eae4552a0a1383f611870b669525_7847	40b06fe84ca1b8758d0c3f8a0dea34af_7317	20e8a30293b7b0c63abbc29d0c4c19ee_1534	6db8800965c51df47e711e72bf22185f_642	0ed7320c6f511ce95f40560feeb5531a_642	K_pneumoniae_6_00709
WP_002895753.1		transketolase	6	6	1	1	955				845	845	845	a177eae4552a0a1383f611870b669525_7218	40b06fe84ca1b8758d0c3f8a0dea34af_6688	20e8a30293b7b0c63abbc29d0c4c19ee_2163	6db8800965c51df47e711e72bf22185f_1271	0ed7320c6f511ce95f40560feeb5531a_1271	K_pneumoniae_6_00405
eat		ethanolamine permease	6	6	1	1	1471				1379	1379	1379	a177eae4552a0a1383f611870b669525_8308	40b06fe84ca1b8758d0c3f8a0dea34af_7778	20e8a30293b7b0c63abbc29d0c4c19ee_5718	6db8800965c51df47e711e72bf22185f_181	0ed7320c6f511ce95f40560feeb5531a_181	K_pneumoniae_6_02970
metH		methionine synthase	6	6	1	1	4909				3683	3683	3683	a177eae4552a0a1383f611870b669525_9840	40b06fe84ca1b8758d0c3f8a0dea34af_9312	20e8a30293b7b0c63abbc29d0c4c19ee_3851	6db8800965c51df47e711e72bf22185f_5118	0ed7320c6f511ce95f40560feeb5531a_4991	K_pneumoniae_6_01797
hpaH		2-oxo-hepta-3-ene-1,7-dioic acid hydratase	6	6	1	1	1838				803	803	803	a177eae4552a0a1383f611870b669525_9087	40b06fe84ca1b8758d0c3f8a0dea34af_8557	20e8a30293b7b0c63abbc29d0c4c19ee_5052	6db8800965c51df47e711e72bf22185f_3917	0ed7320c6f511ce95f40560feeb5531a_4396	K_pneumoniae_6_02553
elbB		isoprenoid biosynthesis glyoxalase ElbB	6	6	1	1	5065				653	653	653	a177eae4552a0a1383f611870b669525_1049	40b06fe84ca1b8758d0c3f8a0dea34af_428	20e8a30293b7b0c63abbc29d0c4c19ee_6271	6db8800965c51df47e711e72bf22185f_6331	0ed7320c6f511ce95f40560feeb5531a_6734	K_pneumoniae_6_03457
WP_004180859.1		YpfN family protein	6	6	1	1	702				206	206	206	a177eae4552a0a1383f611870b669525_2763	40b06fe84ca1b8758d0c3f8a0dea34af_2237	20e8a30293b7b0c63abbc29d0c4c19ee_1112	6db8800965c51df47e711e72bf22185f_2107	0ed7320c6f511ce95f40560feeb5531a_2586	K_pneumoniae_6_01317
WP_002908130.1		ABC transporter substrate-binding protein	6	6	1	1	3982				983	983	983	a177eae4552a0a1383f611870b669525_4705	40b06fe84ca1b8758d0c3f8a0dea34af_5427	20e8a30293b7b0c63abbc29d0c4c19ee_10365	6db8800965c51df47e711e72bf22185f_10450	0ed7320c6f511ce95f40560feeb5531a_10540	K_pneumoniae_6_05019
mnmA		tRNA 2-thiouridine(34) synthase MnmA	6	6	1	1	5272				1106	1166	1116	a177eae4552a0a1383f611870b669525_6549	40b06fe84ca1b8758d0c3f8a0dea34af_6020	20e8a30293b7b0c63abbc29d0c4c19ee_8731	6db8800965c51df47e711e72bf22185f_8802	0ed7320c6f511ce95f40560feeb5531a_9262	K_pneumoniae_6_00077
WP_004151421.1		LysR family transcriptional regulator	6	6	1	1	3434				860	860	860	a177eae4552a0a1383f611870b669525_574	40b06fe84ca1b8758d0c3f8a0dea34af_10493	20e8a30293b7b0c63abbc29d0c4c19ee_7334	6db8800965c51df47e711e72bf22185f_7189	0ed7320c6f511ce95f40560feeb5531a_10429	K_pneumoniae_6_04964
WP_002908374.1		amino acid ABC transporter ATP-binding protein	6	6	1	1	386				722	722	722	a177eae4552a0a1383f611870b669525_4593	40b06fe84ca1b8758d0c3f8a0dea34af_3985	20e8a30293b7b0c63abbc29d0c4c19ee_7700	6db8800965c51df47e711e72bf22185f_7976	0ed7320c6f511ce95f40560feeb5531a_6083	K_pneumoniae_6_03889
WP_004179712.1		FAD:protein FMN transferase	6	6	1	1	4153				950	950	950	a177eae4552a0a1383f611870b669525_5826	40b06fe84ca1b8758d0c3f8a0dea34af_4303	20e8a30293b7b0c63abbc29d0c4c19ee_6812	6db8800965c51df47e711e72bf22185f_7088	0ed7320c6f511ce95f40560feeb5531a_6916	K_pneumoniae_6_03723
WP_004147773.1		lysine exporter LysO family protein	6	6	1	1	871				899	899	899	a177eae4552a0a1383f611870b669525_7052	40b06fe84ca1b8758d0c3f8a0dea34af_6522	20e8a30293b7b0c63abbc29d0c4c19ee_2329	6db8800965c51df47e711e72bf22185f_1437	0ed7320c6f511ce95f40560feeb5531a_1437	K_pneumoniae_6_00321
putA		trifunctional transcriptional regulator/proline dehydrogenase/L-glutamate gamma-semialdehyde dehydrogenase	6	6	1	1	4309				3962	3962	3962	a177eae4552a0a1383f611870b669525_6763	40b06fe84ca1b8758d0c3f8a0dea34af_6231	20e8a30293b7b0c63abbc29d0c4c19ee_5289	6db8800965c51df47e711e72bf22185f_5313	0ed7320c6f511ce95f40560feeb5531a_5792	K_pneumoniae_6_00178
WP_004181610.1		serine/threonine protein kinase	6	6	1	1	3088				986	986	986	a177eae4552a0a1383f611870b669525_10316	40b06fe84ca1b8758d0c3f8a0dea34af_9788	20e8a30293b7b0c63abbc29d0c4c19ee_8400	6db8800965c51df47e711e72bf22185f_8471	0ed7320c6f511ce95f40560feeb5531a_9090	K_pneumoniae_6_04360
WP_004179827.1		hypothetical protein	6	6	1	1	2713				239	239	239	a177eae4552a0a1383f611870b669525_5526	40b06fe84ca1b8758d0c3f8a0dea34af_4603	20e8a30293b7b0c63abbc29d0c4c19ee_10219	6db8800965c51df47e711e72bf22185f_10184	0ed7320c6f511ce95f40560feeb5531a_8711	K_pneumoniae_6_03868
WP_004181155.1		energy-coupling factor ABC transporter ATP-binding protein	6	6	1	1	4451				824	824	824	a177eae4552a0a1383f611870b669525_1917	40b06fe84ca1b8758d0c3f8a0dea34af_1301	20e8a30293b7b0c63abbc29d0c4c19ee_3642	6db8800965c51df47e711e72bf22185f_3313	0ed7320c6f511ce95f40560feeb5531a_3792	K_pneumoniae_6_02261
cutA		divalent cation tolerance protein CutA	6	6	1	1	74				323	323	323	a177eae4552a0a1383f611870b669525_9595	40b06fe84ca1b8758d0c3f8a0dea34af_9065	20e8a30293b7b0c63abbc29d0c4c19ee_4097	6db8800965c51df47e711e72bf22185f_4872	0ed7320c6f511ce95f40560feeb5531a_5237	K_pneumoniae_6_01680
WP_004179313.1		TetR/AcrR family transcriptional regulator	6	6	1	1	4327				593	593	593	a177eae4552a0a1383f611870b669525_6717	40b06fe84ca1b8758d0c3f8a0dea34af_6188	20e8a30293b7b0c63abbc29d0c4c19ee_5246	6db8800965c51df47e711e72bf22185f_5270	0ed7320c6f511ce95f40560feeb5531a_5749	K_pneumoniae_6_00158
WP_004118124.1		Hok/Gef family protein	6	6	1	1	3096				92	161	123	a177eae4552a0a1383f611870b669525_10877	40b06fe84ca1b8758d0c3f8a0dea34af_10692	20e8a30293b7b0c63abbc29d0c4c19ee_11265	6db8800965c51df47e711e72bf22185f_11272	0ed7320c6f511ce95f40560feeb5531a_11260	K_pneumoniae_6_04667
plsX		phosphate acyltransferase PlsX	6	6	1	1	4354				1097	1160	1107	a177eae4552a0a1383f611870b669525_6663	40b06fe84ca1b8758d0c3f8a0dea34af_6134	20e8a30293b7b0c63abbc29d0c4c19ee_5192	6db8800965c51df47e711e72bf22185f_5216	0ed7320c6f511ce95f40560feeb5531a_5695	K_pneumoniae_6_00131
zwf		glucose-6-phosphate dehydrogenase	6	6	1	1	5374				1475	1475	1475	a177eae4552a0a1383f611870b669525_4003	40b06fe84ca1b8758d0c3f8a0dea34af_3394	20e8a30293b7b0c63abbc29d0c4c19ee_10489	6db8800965c51df47e711e72bf22185f_10556	0ed7320c6f511ce95f40560feeb5531a_8000	K_pneumoniae_6_03380
ybfE		LexA regulated protein	6	6	1	1	1067				293	293	293	a177eae4552a0a1383f611870b669525_7468	40b06fe84ca1b8758d0c3f8a0dea34af_6938	20e8a30293b7b0c63abbc29d0c4c19ee_1913	6db8800965c51df47e711e72bf22185f_1021	0ed7320c6f511ce95f40560feeb5531a_1021	K_pneumoniae_6_00523
WP_004181218.1		type 1 fimbrial protein	6	6	1	1	4560				527	527	527	a177eae4552a0a1383f611870b669525_1698	40b06fe84ca1b8758d0c3f8a0dea34af_1082	20e8a30293b7b0c63abbc29d0c4c19ee_9516	6db8800965c51df47e711e72bf22185f_9601	0ed7320c6f511ce95f40560feeb5531a_9899	K_pneumoniae_6_04735
WP_004175410.1		YecH family protein	6	6	1	1	2328				239	239	239	a177eae4552a0a1383f611870b669525_3777	40b06fe84ca1b8758d0c3f8a0dea34af_3174	20e8a30293b7b0c63abbc29d0c4c19ee_177	6db8800965c51df47e711e72bf22185f_5867	0ed7320c6f511ce95f40560feeb5531a_1651	K_pneumoniae_6_00870
queE		7-carboxy-7-deazaguanine synthase QueE	6	6	1	1	1889				671	671	671	a177eae4552a0a1383f611870b669525_2056	40b06fe84ca1b8758d0c3f8a0dea34af_1440	20e8a30293b7b0c63abbc29d0c4c19ee_3503	6db8800965c51df47e711e72bf22185f_3452	0ed7320c6f511ce95f40560feeb5531a_3931	K_pneumoniae_6_02325
WP_004180013.1		ATP-binding protein	6	6	1	1	5603				1343	1343	1343	a177eae4552a0a1383f611870b669525_5249	40b06fe84ca1b8758d0c3f8a0dea34af_4882	20e8a30293b7b0c63abbc29d0c4c19ee_2843	6db8800965c51df47e711e72bf22185f_2843	0ed7320c6f511ce95f40560feeb5531a_3083	K_pneumoniae_6_01931
WP_002892011.1		type B 50S ribosomal protein L31	6	6	1	1	1340				263	263	263	a177eae4552a0a1383f611870b669525_8043	40b06fe84ca1b8758d0c3f8a0dea34af_7513	20e8a30293b7b0c63abbc29d0c4c19ee_1338	6db8800965c51df47e711e72bf22185f_446	0ed7320c6f511ce95f40560feeb5531a_446	K_pneumoniae_6_02840
group_2107	uraH	hydroxyisourate hydrolase	6	6	1	1	2698				326	326	326	a177eae4552a0a1383f611870b669525_5556	40b06fe84ca1b8758d0c3f8a0dea34af_4573	20e8a30293b7b0c63abbc29d0c4c19ee_10189	6db8800965c51df47e711e72bf22185f_10214	0ed7320c6f511ce95f40560feeb5531a_8681	K_pneumoniae_6_03853
WP_004152218.1		SDR family NAD(P)-dependent oxidoreductase	6	6	1	1	838				719	719	719	a177eae4552a0a1383f611870b669525_9205	40b06fe84ca1b8758d0c3f8a0dea34af_8675	20e8a30293b7b0c63abbc29d0c4c19ee_10949	6db8800965c51df47e711e72bf22185f_10986	0ed7320c6f511ce95f40560feeb5531a_10998	K_pneumoniae_6_05215
WP_004179236.1		YbhB/YbcL family Raf kinase inhibitor-like protein	6	6	1	1	4256				554	554	554	a177eae4552a0a1383f611870b669525_6872	40b06fe84ca1b8758d0c3f8a0dea34af_6342	20e8a30293b7b0c63abbc29d0c4c19ee_5398	6db8800965c51df47e711e72bf22185f_5422	0ed7320c6f511ce95f40560feeb5531a_5901	K_pneumoniae_6_00230
rluC		23S rRNA pseudouridine(955/2504/2580) synthase RluC	6	6	1	1	4350				953	995	960	a177eae4552a0a1383f611870b669525_6671	40b06fe84ca1b8758d0c3f8a0dea34af_6142	20e8a30293b7b0c63abbc29d0c4c19ee_5200	6db8800965c51df47e711e72bf22185f_5224	0ed7320c6f511ce95f40560feeb5531a_5703	K_pneumoniae_6_00135
WP_004181545.1		AsmA family protein	6	6	1	1	4850				1715	1715	1715	a177eae4552a0a1383f611870b669525_199	40b06fe84ca1b8758d0c3f8a0dea34af_9934	20e8a30293b7b0c63abbc29d0c4c19ee_7468	6db8800965c51df47e711e72bf22185f_7629	0ed7320c6f511ce95f40560feeb5531a_7592	K_pneumoniae_6_03627
WP_002892007.1		LacI family DNA-binding transcriptional regulator	6	6	1	1	1341				1070	1070	1070	a177eae4552a0a1383f611870b669525_8045	40b06fe84ca1b8758d0c3f8a0dea34af_7515	20e8a30293b7b0c63abbc29d0c4c19ee_5981	6db8800965c51df47e711e72bf22185f_444	0ed7320c6f511ce95f40560feeb5531a_444	K_pneumoniae_6_02841
tolQ		Tol-Pal system protein TolQ	6	6	1	1	1032				692	692	692	a177eae4552a0a1383f611870b669525_7396	40b06fe84ca1b8758d0c3f8a0dea34af_6866	20e8a30293b7b0c63abbc29d0c4c19ee_1985	6db8800965c51df47e711e72bf22185f_1093	0ed7320c6f511ce95f40560feeb5531a_1093	K_pneumoniae_6_00488
arnC		undecaprenyl-phosphate 4-deoxy-4-formamido-L-arabinose transferase	6	6	1	1	3437				983	983	983	a177eae4552a0a1383f611870b669525_580	40b06fe84ca1b8758d0c3f8a0dea34af_10499	20e8a30293b7b0c63abbc29d0c4c19ee_7328	6db8800965c51df47e711e72bf22185f_7195	0ed7320c6f511ce95f40560feeb5531a_10423	K_pneumoniae_6_04961
kacT		type II toxin-antitoxin system toxin KacT	6	6	1	1	850				533	533	533	a177eae4552a0a1383f611870b669525_9181	40b06fe84ca1b8758d0c3f8a0dea34af_8651	20e8a30293b7b0c63abbc29d0c4c19ee_10925	6db8800965c51df47e711e72bf22185f_11010	0ed7320c6f511ce95f40560feeb5531a_10974	K_pneumoniae_6_05203
WP_004147654.1		hypothetical protein	6	6	1	1	1006				305	305	305	a177eae4552a0a1383f611870b669525_7323	40b06fe84ca1b8758d0c3f8a0dea34af_6793	20e8a30293b7b0c63abbc29d0c4c19ee_2058	6db8800965c51df47e711e72bf22185f_1166	0ed7320c6f511ce95f40560feeb5531a_1166	K_pneumoniae_6_00456
WP_004181028.1		HoxN/HupN/NixA family nickel/cobalt transporter	6	6	1	1	1964				1013	1013	1013	a177eae4552a0a1383f611870b669525_2206	40b06fe84ca1b8758d0c3f8a0dea34af_1590	20e8a30293b7b0c63abbc29d0c4c19ee_3353	6db8800965c51df47e711e72bf22185f_3602	0ed7320c6f511ce95f40560feeb5531a_4081	K_pneumoniae_6_02399
WP_004145262.1		glycosyltransferase	6	6	1	1	218				1094	1094	1094	a177eae4552a0a1383f611870b669525_287	40b06fe84ca1b8758d0c3f8a0dea34af_10206	20e8a30293b7b0c63abbc29d0c4c19ee_7556	6db8800965c51df47e711e72bf22185f_7541	0ed7320c6f511ce95f40560feeb5531a_7680	K_pneumoniae_6_03670
rutF		pyrimidine utilization flavin reductase protein F	6	6	1	1	4301				494	494	494	a177eae4552a0a1383f611870b669525_6779	40b06fe84ca1b8758d0c3f8a0dea34af_6247	20e8a30293b7b0c63abbc29d0c4c19ee_5305	6db8800965c51df47e711e72bf22185f_5329	0ed7320c6f511ce95f40560feeb5531a_5808	K_pneumoniae_6_00186
WP_004176531.1		NAD(P)H nitroreductase	6	6	1	1	2216				551	551	551	a177eae4552a0a1383f611870b669525_6415	40b06fe84ca1b8758d0c3f8a0dea34af_5806	20e8a30293b7b0c63abbc29d0c4c19ee_6441	6db8800965c51df47e711e72bf22185f_6768	0ed7320c6f511ce95f40560feeb5531a_7236	K_pneumoniae_6_03207
WP_020324999.1		LysR family transcriptional regulator	6	6	1	1	4348				935	1028	1012	a177eae4552a0a1383f611870b669525_6675	40b06fe84ca1b8758d0c3f8a0dea34af_6146	20e8a30293b7b0c63abbc29d0c4c19ee_5204	6db8800965c51df47e711e72bf22185f_5228	0ed7320c6f511ce95f40560feeb5531a_5707	K_pneumoniae_6_00137
wrbA		NAD(P)H:quinone oxidoreductase	6	6	1	1	4296				596	596	596	a177eae4552a0a1383f611870b669525_6789	40b06fe84ca1b8758d0c3f8a0dea34af_6257	20e8a30293b7b0c63abbc29d0c4c19ee_5315	6db8800965c51df47e711e72bf22185f_5339	0ed7320c6f511ce95f40560feeb5531a_5818	K_pneumoniae_6_00189
ruvB		Holliday junction branch migration DNA helicase RuvB	6	6	1	1	5383				1010	1010	1010	a177eae4552a0a1383f611870b669525_3985	40b06fe84ca1b8758d0c3f8a0dea34af_3376	20e8a30293b7b0c63abbc29d0c4c19ee_10507	6db8800965c51df47e711e72bf22185f_10538	0ed7320c6f511ce95f40560feeb5531a_8018	K_pneumoniae_6_03388
betB		betaine-aldehyde dehydrogenase	6	6	1	1	1186				1472	1472	1472	a177eae4552a0a1383f611870b669525_7729	40b06fe84ca1b8758d0c3f8a0dea34af_7199	20e8a30293b7b0c63abbc29d0c4c19ee_1652	6db8800965c51df47e711e72bf22185f_760	0ed7320c6f511ce95f40560feeb5531a_760	K_pneumoniae_6_00649
WP_004152717.1		hypothetical protein	6	6	1	1	3099				356	356	356	a177eae4552a0a1383f611870b669525_10871	40b06fe84ca1b8758d0c3f8a0dea34af_10698	20e8a30293b7b0c63abbc29d0c4c19ee_11230	6db8800965c51df47e711e72bf22185f_11247	0ed7320c6f511ce95f40560feeb5531a_11231	K_pneumoniae_6_05368
rplC		50S ribosomal protein L3	6	6	1	1	5165				629	629	629	a177eae4552a0a1383f611870b669525_834	40b06fe84ca1b8758d0c3f8a0dea34af_213	20e8a30293b7b0c63abbc29d0c4c19ee_10743	6db8800965c51df47e711e72bf22185f_10828	0ed7320c6f511ce95f40560feeb5531a_10780	K_pneumoniae_6_05139
WP_004179945.1		alanine--glyoxylate aminotransferase family protein	6	6	1	1	5559				1241	1241	1241	a177eae4552a0a1383f611870b669525_5340	40b06fe84ca1b8758d0c3f8a0dea34af_4791	20e8a30293b7b0c63abbc29d0c4c19ee_2934	6db8800965c51df47e711e72bf22185f_2934	0ed7320c6f511ce95f40560feeb5531a_2992	K_pneumoniae_6_01889
WP_004180381.1		DMT family transporter	6	6	1	1	4634				896	896	896	a177eae4552a0a1383f611870b669525_4323	40b06fe84ca1b8758d0c3f8a0dea34af_3718	20e8a30293b7b0c63abbc29d0c4c19ee_10003	6db8800965c51df47e711e72bf22185f_10175	0ed7320c6f511ce95f40560feeb5531a_6350	K_pneumoniae_6_03231
WP_004142079.1		Bax inhibitor-1/YccA family protein	6	6	1	1	969				704	704	704	a177eae4552a0a1383f611870b669525_7246	40b06fe84ca1b8758d0c3f8a0dea34af_6716	20e8a30293b7b0c63abbc29d0c4c19ee_2135	6db8800965c51df47e711e72bf22185f_1243	0ed7320c6f511ce95f40560feeb5531a_1243	K_pneumoniae_6_00418
WP_004140489.1		DUF2534 family protein	6	6	1	1	5300				263	263	263	a177eae4552a0a1383f611870b669525_6493	40b06fe84ca1b8758d0c3f8a0dea34af_5964	20e8a30293b7b0c63abbc29d0c4c19ee_8675	6db8800965c51df47e711e72bf22185f_8746	0ed7320c6f511ce95f40560feeb5531a_9206	K_pneumoniae_6_00051
WP_004152268.1		amidohydrolase/deacetylase family metallohydrolase	6	6	1	1	5922				1133	1133	1133	a177eae4552a0a1383f611870b669525_9370	40b06fe84ca1b8758d0c3f8a0dea34af_8840	20e8a30293b7b0c63abbc29d0c4c19ee_4322	6db8800965c51df47e711e72bf22185f_4647	0ed7320c6f511ce95f40560feeb5531a_5462	K_pneumoniae_6_01571
rimJ		ribosomal protein S5-alanine N-acetyltransferase	6	6	1	1	4343				584	623	590	a177eae4552a0a1383f611870b669525_6685	40b06fe84ca1b8758d0c3f8a0dea34af_6156	20e8a30293b7b0c63abbc29d0c4c19ee_5214	6db8800965c51df47e711e72bf22185f_5238	0ed7320c6f511ce95f40560feeb5531a_5717	K_pneumoniae_6_00142
livH		high-affinity branched-chain amino acid ABC transporter permease LivH	6	6	1	1	3558				926	926	926	a177eae4552a0a1383f611870b669525_634	40b06fe84ca1b8758d0c3f8a0dea34af_13	20e8a30293b7b0c63abbc29d0c4c19ee_7276	6db8800965c51df47e711e72bf22185f_7247	0ed7320c6f511ce95f40560feeb5531a_8461	K_pneumoniae_6_04263
WP_004180792.1		CynX/NimT family MFS transporter	6	6	1	1	633				1196	1196	1196	a177eae4552a0a1383f611870b669525_2920	40b06fe84ca1b8758d0c3f8a0dea34af_2394	20e8a30293b7b0c63abbc29d0c4c19ee_955	6db8800965c51df47e711e72bf22185f_1950	0ed7320c6f511ce95f40560feeb5531a_2429	K_pneumoniae_6_01246
group_2132	araC	arabinose operon transcriptional regulator AraC	6	6	1	1	1713				845	845	845	a177eae4552a0a1383f611870b669525_8821	40b06fe84ca1b8758d0c3f8a0dea34af_8291	20e8a30293b7b0c63abbc29d0c4c19ee_4786	6db8800965c51df47e711e72bf22185f_4183	0ed7320c6f511ce95f40560feeb5531a_4662	K_pneumoniae_6_02678
uvrA		excinuclease ABC subunit UvrA	6	6	1	1	156				2825	2825	2825	a177eae4552a0a1383f611870b669525_9760	40b06fe84ca1b8758d0c3f8a0dea34af_9230	20e8a30293b7b0c63abbc29d0c4c19ee_3932	6db8800965c51df47e711e72bf22185f_5037	0ed7320c6f511ce95f40560feeb5531a_5072	K_pneumoniae_6_01758
fhuC		Fe3+-hydroxamate ABC transporter ATP-binding protein FhuC	6	6	1	1	1606				797	797	797	a177eae4552a0a1383f611870b669525_8602	40b06fe84ca1b8758d0c3f8a0dea34af_8072	20e8a30293b7b0c63abbc29d0c4c19ee_4567	6db8800965c51df47e711e72bf22185f_4402	0ed7320c6f511ce95f40560feeb5531a_4881	K_pneumoniae_6_02782
katG		catalase/peroxidase HPI	6	6	1	1	5616				2177	2177	2177	a177eae4552a0a1383f611870b669525_5223	40b06fe84ca1b8758d0c3f8a0dea34af_4908	20e8a30293b7b0c63abbc29d0c4c19ee_2816	6db8800965c51df47e711e72bf22185f_2816	0ed7320c6f511ce95f40560feeb5531a_3110	K_pneumoniae_6_01943
WP_002894353.1		sugar ABC transporter substrate-binding protein	6	6	1	1	1128				980	980	980	a177eae4552a0a1383f611870b669525_7611	40b06fe84ca1b8758d0c3f8a0dea34af_7081	20e8a30293b7b0c63abbc29d0c4c19ee_1770	6db8800965c51df47e711e72bf22185f_878	0ed7320c6f511ce95f40560feeb5531a_878	K_pneumoniae_6_00591
WP_004180333.1		LysR family transcriptional regulator	6	6	1	1	371				893	893	893	a177eae4552a0a1383f611870b669525_4563	40b06fe84ca1b8758d0c3f8a0dea34af_3955	20e8a30293b7b0c63abbc29d0c4c19ee_7730	6db8800965c51df47e711e72bf22185f_7946	0ed7320c6f511ce95f40560feeb5531a_6113	K_pneumoniae_6_03904
WP_043906950.1		Gfo/Idh/MocA family oxidoreductase	6	6	1	1	735				1079	1079	1079	a177eae4552a0a1383f611870b669525_2697	40b06fe84ca1b8758d0c3f8a0dea34af_2171	20e8a30293b7b0c63abbc29d0c4c19ee_1178	6db8800965c51df47e711e72bf22185f_2173	0ed7320c6f511ce95f40560feeb5531a_2652	K_pneumoniae_6_01350
fucO		lactaldehyde reductase	6	6	1	1	3055				1148	1148	1148	a177eae4552a0a1383f611870b669525_10252	40b06fe84ca1b8758d0c3f8a0dea34af_9724	20e8a30293b7b0c63abbc29d0c4c19ee_8464	6db8800965c51df47e711e72bf22185f_8535	0ed7320c6f511ce95f40560feeb5531a_9026	K_pneumoniae_6_04393
WP_002898911.1		nucleoside transporter	6	6	1	1	4312				1184	1217	1189	a177eae4552a0a1383f611870b669525_6757	40b06fe84ca1b8758d0c3f8a0dea34af_6225	20e8a30293b7b0c63abbc29d0c4c19ee_5283	6db8800965c51df47e711e72bf22185f_5307	0ed7320c6f511ce95f40560feeb5531a_5786	K_pneumoniae_6_00175
WP_002892370.1		hypothetical protein	6	6	1	1	1286				170	170	170	a177eae4552a0a1383f611870b669525_7929	40b06fe84ca1b8758d0c3f8a0dea34af_7399	20e8a30293b7b0c63abbc29d0c4c19ee_1452	6db8800965c51df47e711e72bf22185f_560	0ed7320c6f511ce95f40560feeb5531a_560	K_pneumoniae_6_00747
ybtU		yersiniabactin biosynthesis oxidoreductase YbtU	6	6	1	1	2829				1100	1100	1100	a177eae4552a0a1383f611870b669525_3624	40b06fe84ca1b8758d0c3f8a0dea34af_3054	20e8a30293b7b0c63abbc29d0c4c19ee_297	6db8800965c51df47e711e72bf22185f_5747	0ed7320c6f511ce95f40560feeb5531a_1771	K_pneumoniae_6_00927
WP_004178874.1		DUF3302 domain-containing protein	6	6	1	1	1260				344	344	344	a177eae4552a0a1383f611870b669525_7875	40b06fe84ca1b8758d0c3f8a0dea34af_7345	20e8a30293b7b0c63abbc29d0c4c19ee_1506	6db8800965c51df47e711e72bf22185f_614	0ed7320c6f511ce95f40560feeb5531a_614	K_pneumoniae_6_00721
WP_004151501.1		chloride channel protein	6	6	1	1	4829				1250	1250	1250	a177eae4552a0a1383f611870b669525_241	40b06fe84ca1b8758d0c3f8a0dea34af_9892	20e8a30293b7b0c63abbc29d0c4c19ee_7510	6db8800965c51df47e711e72bf22185f_7587	0ed7320c6f511ce95f40560feeb5531a_7634	K_pneumoniae_6_03648
rhaB		rhamnulokinase	6	6	1	1	3048				1466	1466	1466	a177eae4552a0a1383f611870b669525_10238	40b06fe84ca1b8758d0c3f8a0dea34af_9710	20e8a30293b7b0c63abbc29d0c4c19ee_8478	6db8800965c51df47e711e72bf22185f_8549	0ed7320c6f511ce95f40560feeb5531a_9012	K_pneumoniae_6_04400
WP_002921917.1		OmpA family lipoprotein	6	6	1	1	3939				662	662	662	a177eae4552a0a1383f611870b669525_415	40b06fe84ca1b8758d0c3f8a0dea34af_10334	20e8a30293b7b0c63abbc29d0c4c19ee_8785	6db8800965c51df47e711e72bf22185f_8856	0ed7320c6f511ce95f40560feeb5531a_9405	K_pneumoniae_6_04539
WP_004144829.1		siderophore-interacting protein	6	6	1	1	4958				776	776	776	a177eae4552a0a1383f611870b669525_1270	40b06fe84ca1b8758d0c3f8a0dea34af_649	20e8a30293b7b0c63abbc29d0c4c19ee_6050	6db8800965c51df47e711e72bf22185f_6110	0ed7320c6f511ce95f40560feeb5531a_6513	K_pneumoniae_6_03566
rsxB		electron transport complex subunit RsxB	6	6	1	1	5776				578	578	578	a177eae4552a0a1383f611870b669525_4903	40b06fe84ca1b8758d0c3f8a0dea34af_5228	20e8a30293b7b0c63abbc29d0c4c19ee_2496	6db8800965c51df47e711e72bf22185f_2496	0ed7320c6f511ce95f40560feeb5531a_3430	K_pneumoniae_6_02094
mutL		DNA mismatch repair endonuclease MutL	6	6	1	1	5941				1859	1859	1859	a177eae4552a0a1383f611870b669525_9510	40b06fe84ca1b8758d0c3f8a0dea34af_8980	20e8a30293b7b0c63abbc29d0c4c19ee_4182	6db8800965c51df47e711e72bf22185f_4787	0ed7320c6f511ce95f40560feeb5531a_5322	K_pneumoniae_6_01639
WP_002898450.1		AraC family transcriptional regulator	6	6	1	1	4257				788	788	788	a177eae4552a0a1383f611870b669525_6870	40b06fe84ca1b8758d0c3f8a0dea34af_6340	20e8a30293b7b0c63abbc29d0c4c19ee_5396	6db8800965c51df47e711e72bf22185f_5420	0ed7320c6f511ce95f40560feeb5531a_5899	K_pneumoniae_6_00229
WP_014907871.1		LysR substrate-binding domain-containing protein	6	6	1	1	4282				941	962	958	a177eae4552a0a1383f611870b669525_6815	40b06fe84ca1b8758d0c3f8a0dea34af_6283	20e8a30293b7b0c63abbc29d0c4c19ee_5341	6db8800965c51df47e711e72bf22185f_5365	0ed7320c6f511ce95f40560feeb5531a_5844	K_pneumoniae_6_00203
WP_004179694.1		3-carboxy-cis,cis-muconate cycloisomerase	6	6	1	1	4146				1352	1352	1352	a177eae4552a0a1383f611870b669525_5840	40b06fe84ca1b8758d0c3f8a0dea34af_4289	20e8a30293b7b0c63abbc29d0c4c19ee_6826	6db8800965c51df47e711e72bf22185f_7074	0ed7320c6f511ce95f40560feeb5531a_6930	K_pneumoniae_6_04131
prlC		oligopeptidase A	6	6	1	1	3406				2042	2042	2042	a177eae4552a0a1383f611870b669525_510	40b06fe84ca1b8758d0c3f8a0dea34af_10429	20e8a30293b7b0c63abbc29d0c4c19ee_8880	6db8800965c51df47e711e72bf22185f_8951	0ed7320c6f511ce95f40560feeb5531a_9310	K_pneumoniae_6_04587
WP_004180785.1		hypothetical protein	6	6	1	1	630				881	881	881	a177eae4552a0a1383f611870b669525_2926	40b06fe84ca1b8758d0c3f8a0dea34af_2400	20e8a30293b7b0c63abbc29d0c4c19ee_949	6db8800965c51df47e711e72bf22185f_1944	0ed7320c6f511ce95f40560feeb5531a_2423	K_pneumoniae_6_01243
pqiC		membrane integrity-associated transporter subunit PqiC	6	6	1	1	4235				563	563	563	a177eae4552a0a1383f611870b669525_6914	40b06fe84ca1b8758d0c3f8a0dea34af_6384	20e8a30293b7b0c63abbc29d0c4c19ee_5440	6db8800965c51df47e711e72bf22185f_5464	0ed7320c6f511ce95f40560feeb5531a_5943	K_pneumoniae_6_00250
rnr		ribonuclease R	6	6	1	1	5951				2432	2432	2432	a177eae4552a0a1383f611870b669525_9490	40b06fe84ca1b8758d0c3f8a0dea34af_8960	20e8a30293b7b0c63abbc29d0c4c19ee_4202	6db8800965c51df47e711e72bf22185f_4767	0ed7320c6f511ce95f40560feeb5531a_5342	K_pneumoniae_6_01629
ycfP		alpha/beta hydrolase YcfP	6	6	1	1	4371				542	542	542	a177eae4552a0a1383f611870b669525_6629	40b06fe84ca1b8758d0c3f8a0dea34af_6100	20e8a30293b7b0c63abbc29d0c4c19ee_5158	6db8800965c51df47e711e72bf22185f_5182	0ed7320c6f511ce95f40560feeb5531a_5661	K_pneumoniae_6_00114
thiI		tRNA 4-thiouridine(8) synthase ThiI	6	6	1	1	1400				1448	1448	1448	a177eae4552a0a1383f611870b669525_8166	40b06fe84ca1b8758d0c3f8a0dea34af_7636	20e8a30293b7b0c63abbc29d0c4c19ee_5860	6db8800965c51df47e711e72bf22185f_323	0ed7320c6f511ce95f40560feeb5531a_323	K_pneumoniae_6_02901
serB		phosphoserine phosphatase	6	6	1	1	1780				971	971	971	a177eae4552a0a1383f611870b669525_8958	40b06fe84ca1b8758d0c3f8a0dea34af_8428	20e8a30293b7b0c63abbc29d0c4c19ee_4923	6db8800965c51df47e711e72bf22185f_4046	0ed7320c6f511ce95f40560feeb5531a_4525	K_pneumoniae_6_02613
WP_004178374.1		type II toxin-antitoxin system RelE/ParE family toxin	6	6	1	1	5916				284	284	284	a177eae4552a0a1383f611870b669525_9358	40b06fe84ca1b8758d0c3f8a0dea34af_8828	20e8a30293b7b0c63abbc29d0c4c19ee_4334	6db8800965c51df47e711e72bf22185f_4635	0ed7320c6f511ce95f40560feeb5531a_5474	K_pneumoniae_6_01565
WP_002913890.1		YfgM family protein	6	6	1	1	762				620	620	620	a177eae4552a0a1383f611870b669525_2643	40b06fe84ca1b8758d0c3f8a0dea34af_2117	20e8a30293b7b0c63abbc29d0c4c19ee_1232	6db8800965c51df47e711e72bf22185f_2227	0ed7320c6f511ce95f40560feeb5531a_2706	K_pneumoniae_6_01375
WP_162880601.1		BapA prefix-like domain-containing protein	6	6	1	1	4248				6398	7793	7560	a177eae4552a0a1383f611870b669525_6888	40b06fe84ca1b8758d0c3f8a0dea34af_6358	20e8a30293b7b0c63abbc29d0c4c19ee_5414	6db8800965c51df47e711e72bf22185f_5438	0ed7320c6f511ce95f40560feeb5531a_5917	K_pneumoniae_6_00238
WP_002920143.1		YheV family putative metal-binding protein	6	6	1	1	5241				200	200	200	a177eae4552a0a1383f611870b669525_802	40b06fe84ca1b8758d0c3f8a0dea34af_181	20e8a30293b7b0c63abbc29d0c4c19ee_7108	6db8800965c51df47e711e72bf22185f_7415	0ed7320c6f511ce95f40560feeb5531a_8293	K_pneumoniae_6_04346
proS		proline--tRNA ligase	6	6	1	1	1564				1718	1718	1718	a177eae4552a0a1383f611870b669525_8518	40b06fe84ca1b8758d0c3f8a0dea34af_7988	20e8a30293b7b0c63abbc29d0c4c19ee_4483	6db8800965c51df47e711e72bf22185f_4486	0ed7320c6f511ce95f40560feeb5531a_4965	K_pneumoniae_6_02824
guaD		guanine deaminase	6	6	1	1	5589				1310	1310	1310	a177eae4552a0a1383f611870b669525_5280	40b06fe84ca1b8758d0c3f8a0dea34af_4851	20e8a30293b7b0c63abbc29d0c4c19ee_2874	6db8800965c51df47e711e72bf22185f_2874	0ed7320c6f511ce95f40560feeb5531a_3052	K_pneumoniae_6_01917
dppD		dipeptide ABC transporter ATP-binding protein	6	6	1	1	3370				983	983	983	a177eae4552a0a1383f611870b669525_440	40b06fe84ca1b8758d0c3f8a0dea34af_10359	20e8a30293b7b0c63abbc29d0c4c19ee_8810	6db8800965c51df47e711e72bf22185f_8881	0ed7320c6f511ce95f40560feeb5531a_9380	K_pneumoniae_6_04551
putP		sodium/proline symporter PutP	6	6	1	1	4310				1508	1508	1508	a177eae4552a0a1383f611870b669525_6761	40b06fe84ca1b8758d0c3f8a0dea34af_6229	20e8a30293b7b0c63abbc29d0c4c19ee_5287	6db8800965c51df47e711e72bf22185f_5311	0ed7320c6f511ce95f40560feeb5531a_5790	K_pneumoniae_6_00177
WP_013214030.1		hypothetical protein	6	6	1	1	3131				326	326	326	a177eae4552a0a1383f611870b669525_10805	40b06fe84ca1b8758d0c3f8a0dea34af_10764	20e8a30293b7b0c63abbc29d0c4c19ee_9271	6db8800965c51df47e711e72bf22185f_9194	0ed7320c6f511ce95f40560feeb5531a_9702	K_pneumoniae_6_04641
bssR		biofilm formation regulator BssR	6	6	1	1	912				383	383	383	a177eae4552a0a1383f611870b669525_7134	40b06fe84ca1b8758d0c3f8a0dea34af_6604	20e8a30293b7b0c63abbc29d0c4c19ee_2247	6db8800965c51df47e711e72bf22185f_1355	0ed7320c6f511ce95f40560feeb5531a_1355	K_pneumoniae_6_00362
srlD		sorbitol-6-phosphate dehydrogenase	6	6	1	1	1971				779	779	779	a177eae4552a0a1383f611870b669525_2220	40b06fe84ca1b8758d0c3f8a0dea34af_1604	20e8a30293b7b0c63abbc29d0c4c19ee_3339	6db8800965c51df47e711e72bf22185f_3616	0ed7320c6f511ce95f40560feeb5531a_4095	K_pneumoniae_6_02406
xis		excisionase Xis	6	6	1	1	2091				275	275	275	a177eae4552a0a1383f611870b669525_2489	40b06fe84ca1b8758d0c3f8a0dea34af_1873	20e8a30293b7b0c63abbc29d0c4c19ee_9870	6db8800965c51df47e711e72bf22185f_9955	0ed7320c6f511ce95f40560feeb5531a_10253	K_pneumoniae_6_04893
WP_004179398.1		NAD(P)H-quinone oxidoreductase	6	6	1	1	2212				980	980	980	a177eae4552a0a1383f611870b669525_6407	40b06fe84ca1b8758d0c3f8a0dea34af_5798	20e8a30293b7b0c63abbc29d0c4c19ee_6449	6db8800965c51df47e711e72bf22185f_6760	0ed7320c6f511ce95f40560feeb5531a_7244	K_pneumoniae_6_03203
mgsA		methylglyoxal synthase	6	6	1	1	4246				458	473	460	a177eae4552a0a1383f611870b669525_6892	40b06fe84ca1b8758d0c3f8a0dea34af_6362	20e8a30293b7b0c63abbc29d0c4c19ee_5418	6db8800965c51df47e711e72bf22185f_5442	0ed7320c6f511ce95f40560feeb5531a_5921	K_pneumoniae_6_00240
WP_002916277.1		peptide MFS transporter	6	6	1	1	4571				1553	1553	1553	a177eae4552a0a1383f611870b669525_1676	40b06fe84ca1b8758d0c3f8a0dea34af_1060	20e8a30293b7b0c63abbc29d0c4c19ee_9494	6db8800965c51df47e711e72bf22185f_9579	0ed7320c6f511ce95f40560feeb5531a_9877	K_pneumoniae_6_04724
nusG		transcription termination/antitermination protein NusG	6	6	1	1	4944				545	545	545	a177eae4552a0a1383f611870b669525_9923	40b06fe84ca1b8758d0c3f8a0dea34af_9395	20e8a30293b7b0c63abbc29d0c4c19ee_10662	6db8800965c51df47e711e72bf22185f_10747	0ed7320c6f511ce95f40560feeb5531a_10699	K_pneumoniae_6_05072
eamB		cysteine/O-acetylserine transporter	6	6	1	1	1546				590	590	590	a177eae4552a0a1383f611870b669525_8461	40b06fe84ca1b8758d0c3f8a0dea34af_7931	20e8a30293b7b0c63abbc29d0c4c19ee_5565	6db8800965c51df47e711e72bf22185f_28	0ed7320c6f511ce95f40560feeb5531a_28	K_pneumoniae_6_03045
WP_004179785.1		GNAT family N-acetyltransferase	6	6	1	1	2668				530	530	530	a177eae4552a0a1383f611870b669525_5618	40b06fe84ca1b8758d0c3f8a0dea34af_4511	20e8a30293b7b0c63abbc29d0c4c19ee_10127	6db8800965c51df47e711e72bf22185f_10276	0ed7320c6f511ce95f40560feeb5531a_8619	K_pneumoniae_6_03823
WP_004179446.1		MarR family winged helix-turn-helix transcriptional regulator	6	6	1	1	3201				458	458	458	a177eae4552a0a1383f611870b669525_6315	40b06fe84ca1b8758d0c3f8a0dea34af_5706	20e8a30293b7b0c63abbc29d0c4c19ee_6541	6db8800965c51df47e711e72bf22185f_6668	0ed7320c6f511ce95f40560feeb5531a_7336	K_pneumoniae_6_03158
dapD		2,3,4,5-tetrahydropyridine-2,6-dicarboxylate N-succinyltransferase	6	6	1	1	1593				824	824	824	a177eae4552a0a1383f611870b669525_8576	40b06fe84ca1b8758d0c3f8a0dea34af_8046	20e8a30293b7b0c63abbc29d0c4c19ee_4541	6db8800965c51df47e711e72bf22185f_4428	0ed7320c6f511ce95f40560feeb5531a_4907	K_pneumoniae_6_02795
WP_004179153.1		SDR family oxidoreductase	6	6	1	1	877				1442	1442	1442	a177eae4552a0a1383f611870b669525_7064	40b06fe84ca1b8758d0c3f8a0dea34af_6534	20e8a30293b7b0c63abbc29d0c4c19ee_2317	6db8800965c51df47e711e72bf22185f_1425	0ed7320c6f511ce95f40560feeb5531a_1425	K_pneumoniae_6_00327
WP_043906891.1		DUF805 domain-containing protein	6	6	1	1	4990				368	368	368	a177eae4552a0a1383f611870b669525_1206	40b06fe84ca1b8758d0c3f8a0dea34af_585	20e8a30293b7b0c63abbc29d0c4c19ee_6114	6db8800965c51df47e711e72bf22185f_6174	0ed7320c6f511ce95f40560feeb5531a_6577	K_pneumoniae_6_03534
WP_004181536.1		isocitrate lyase/phosphoenolpyruvate mutase family protein	6	6	1	1	4827				746	746	746	a177eae4552a0a1383f611870b669525_245	40b06fe84ca1b8758d0c3f8a0dea34af_9888	20e8a30293b7b0c63abbc29d0c4c19ee_7514	6db8800965c51df47e711e72bf22185f_7583	0ed7320c6f511ce95f40560feeb5531a_7638	K_pneumoniae_6_03650
maeB		NADP-dependent oxaloacetate-decarboxylating malate dehydrogenase	6	6	1	1	693				2279	2279	2279	a177eae4552a0a1383f611870b669525_2783	40b06fe84ca1b8758d0c3f8a0dea34af_2257	20e8a30293b7b0c63abbc29d0c4c19ee_1092	6db8800965c51df47e711e72bf22185f_2087	0ed7320c6f511ce95f40560feeb5531a_2566	K_pneumoniae_6_01308
pncB		nicotinate phosphoribosyltransferase	6	6	1	1	4221				1202	1238	1208	a177eae4552a0a1383f611870b669525_6942	40b06fe84ca1b8758d0c3f8a0dea34af_6412	20e8a30293b7b0c63abbc29d0c4c19ee_5468	6db8800965c51df47e711e72bf22185f_5492	0ed7320c6f511ce95f40560feeb5531a_5971	K_pneumoniae_6_00264
pepA		leucyl aminopeptidase	6	6	1	1	5894				1511	1511	1511	a177eae4552a0a1383f611870b669525_9312	40b06fe84ca1b8758d0c3f8a0dea34af_8782	20e8a30293b7b0c63abbc29d0c4c19ee_4380	6db8800965c51df47e711e72bf22185f_4589	0ed7320c6f511ce95f40560feeb5531a_5520	K_pneumoniae_6_01544
arsC		arsenate reductase (glutaredoxin)	6	6	1	1	714				359	359	359	a177eae4552a0a1383f611870b669525_2739	40b06fe84ca1b8758d0c3f8a0dea34af_2213	20e8a30293b7b0c63abbc29d0c4c19ee_1136	6db8800965c51df47e711e72bf22185f_2131	0ed7320c6f511ce95f40560feeb5531a_2610	K_pneumoniae_6_01328
recA		recombinase RecA	6	6	1	1	1981				1058	1058	1058	a177eae4552a0a1383f611870b669525_2238	40b06fe84ca1b8758d0c3f8a0dea34af_1622	20e8a30293b7b0c63abbc29d0c4c19ee_3319	6db8800965c51df47e711e72bf22185f_3634	0ed7320c6f511ce95f40560feeb5531a_4113	K_pneumoniae_6_02416
group_2183	pdxA	4-hydroxythreonine-4-phosphate dehydrogenase PdxA	6	6	1	1	1727				989	989	989	a177eae4552a0a1383f611870b669525_8849	40b06fe84ca1b8758d0c3f8a0dea34af_8319	20e8a30293b7b0c63abbc29d0c4c19ee_4814	6db8800965c51df47e711e72bf22185f_4155	0ed7320c6f511ce95f40560feeb5531a_4634	K_pneumoniae_6_02664
pduO		two-domain cob(I)yrinic acid a,c-diamide adenosyltransferase PduO	6	6	1	1	4481				1016	1016	1016	a177eae4552a0a1383f611870b669525_1856	40b06fe84ca1b8758d0c3f8a0dea34af_1240	20e8a30293b7b0c63abbc29d0c4c19ee_3703	6db8800965c51df47e711e72bf22185f_3252	0ed7320c6f511ce95f40560feeb5531a_3731	K_pneumoniae_6_02231
slmA		nucleoid occlusion factor SlmA	6	6	1	1	229				596	596	596	a177eae4552a0a1383f611870b669525_265	40b06fe84ca1b8758d0c3f8a0dea34af_10184	20e8a30293b7b0c63abbc29d0c4c19ee_7534	6db8800965c51df47e711e72bf22185f_7563	0ed7320c6f511ce95f40560feeb5531a_7658	K_pneumoniae_6_03659
WP_004181483.1		phenolic acid decarboxylase	6	6	1	1	3435				506	506	506	a177eae4552a0a1383f611870b669525_576	40b06fe84ca1b8758d0c3f8a0dea34af_10495	20e8a30293b7b0c63abbc29d0c4c19ee_7332	6db8800965c51df47e711e72bf22185f_7191	0ed7320c6f511ce95f40560feeb5531a_10427	K_pneumoniae_6_04963
WP_002890230.1		YaiI/YqxD family protein	6	6	1	1	1447				458	458	458	a177eae4552a0a1383f611870b669525_8260	40b06fe84ca1b8758d0c3f8a0dea34af_7730	20e8a30293b7b0c63abbc29d0c4c19ee_5766	6db8800965c51df47e711e72bf22185f_229	0ed7320c6f511ce95f40560feeb5531a_229	K_pneumoniae_6_02947
yacG		DNA gyrase inhibitor YacG	6	6	1	1	1671				194	194	194	a177eae4552a0a1383f611870b669525_8736	40b06fe84ca1b8758d0c3f8a0dea34af_8206	20e8a30293b7b0c63abbc29d0c4c19ee_4701	6db8800965c51df47e711e72bf22185f_4268	0ed7320c6f511ce95f40560feeb5531a_4747	K_pneumoniae_6_02720
sppA		signal peptide peptidase SppA	6	6	1	1	2217				1853	1853	1853	a177eae4552a0a1383f611870b669525_6417	40b06fe84ca1b8758d0c3f8a0dea34af_5808	20e8a30293b7b0c63abbc29d0c4c19ee_6439	6db8800965c51df47e711e72bf22185f_6770	0ed7320c6f511ce95f40560feeb5531a_7234	K_pneumoniae_6_03208
dpaL		diaminopropionate ammonia-lyase	6	6	1	1	4217				1151	1211	1181	a177eae4552a0a1383f611870b669525_6950	40b06fe84ca1b8758d0c3f8a0dea34af_6420	20e8a30293b7b0c63abbc29d0c4c19ee_5476	6db8800965c51df47e711e72bf22185f_5500	0ed7320c6f511ce95f40560feeb5531a_5979	K_pneumoniae_6_00268
WP_004151392.1		5-carboxymethyl-2-hydroxymuconate Delta-isomerase	6	6	1	1	1837				380	380	380	a177eae4552a0a1383f611870b669525_9085	40b06fe84ca1b8758d0c3f8a0dea34af_8555	20e8a30293b7b0c63abbc29d0c4c19ee_5050	6db8800965c51df47e711e72bf22185f_3919	0ed7320c6f511ce95f40560feeb5531a_4398	K_pneumoniae_6_02554
truB		tRNA pseudouridine(55) synthase TruB	6	6	1	1	5023				944	944	944	a177eae4552a0a1383f611870b669525_1139	40b06fe84ca1b8758d0c3f8a0dea34af_518	20e8a30293b7b0c63abbc29d0c4c19ee_6181	6db8800965c51df47e711e72bf22185f_6241	0ed7320c6f511ce95f40560feeb5531a_6644	K_pneumoniae_6_03501
argF		ornithine carbamoyltransferase	6	6	1	1	5900				1004	1004	1004	a177eae4552a0a1383f611870b669525_9324	40b06fe84ca1b8758d0c3f8a0dea34af_8794	20e8a30293b7b0c63abbc29d0c4c19ee_4368	6db8800965c51df47e711e72bf22185f_4601	0ed7320c6f511ce95f40560feeb5531a_5508	K_pneumoniae_6_01550
WP_002914979.1		PTS sugar transporter subunit IIB	6	6	1	1	1938				314	314	314	a177eae4552a0a1383f611870b669525_2154	40b06fe84ca1b8758d0c3f8a0dea34af_1538	20e8a30293b7b0c63abbc29d0c4c19ee_3405	6db8800965c51df47e711e72bf22185f_3550	0ed7320c6f511ce95f40560feeb5531a_4029	K_pneumoniae_6_02373
WP_002890412.1		nucleoside-specific channel-forming protein Tsx	6	6	1	1	1412				884	884	884	a177eae4552a0a1383f611870b669525_8190	40b06fe84ca1b8758d0c3f8a0dea34af_7660	20e8a30293b7b0c63abbc29d0c4c19ee_5836	6db8800965c51df47e711e72bf22185f_299	0ed7320c6f511ce95f40560feeb5531a_299	K_pneumoniae_6_02913
WP_004179997.1		Gfo/Idh/MocA family oxidoreductase	6	6	1	1	5593				1172	1172	1172	a177eae4552a0a1383f611870b669525_5272	40b06fe84ca1b8758d0c3f8a0dea34af_4859	20e8a30293b7b0c63abbc29d0c4c19ee_2866	6db8800965c51df47e711e72bf22185f_2866	0ed7320c6f511ce95f40560feeb5531a_3060	K_pneumoniae_6_01921
WP_004143665.1		transporter substrate-binding domain-containing protein	6	6	1	1	5563				785	785	785	a177eae4552a0a1383f611870b669525_5332	40b06fe84ca1b8758d0c3f8a0dea34af_4799	20e8a30293b7b0c63abbc29d0c4c19ee_2926	6db8800965c51df47e711e72bf22185f_2926	0ed7320c6f511ce95f40560feeb5531a_3000	K_pneumoniae_6_01893
puuE		allantoinase PuuE	6	6	1	1	5585				932	932	932	a177eae4552a0a1383f611870b669525_5288	40b06fe84ca1b8758d0c3f8a0dea34af_4843	20e8a30293b7b0c63abbc29d0c4c19ee_2882	6db8800965c51df47e711e72bf22185f_2882	0ed7320c6f511ce95f40560feeb5531a_3044	K_pneumoniae_6_01913
WP_004180181.1		ABC transporter substrate-binding protein	6	6	1	1	5831				1703	1703	1703	a177eae4552a0a1383f611870b669525_4784	40b06fe84ca1b8758d0c3f8a0dea34af_5349	20e8a30293b7b0c63abbc29d0c4c19ee_2377	6db8800965c51df47e711e72bf22185f_2377	0ed7320c6f511ce95f40560feeb5531a_3549	K_pneumoniae_6_02152
tesB		acyl-CoA thioesterase II	6	6	1	1	1360				863	863	863	a177eae4552a0a1383f611870b669525_8086	40b06fe84ca1b8758d0c3f8a0dea34af_7556	20e8a30293b7b0c63abbc29d0c4c19ee_5940	6db8800965c51df47e711e72bf22185f_403	0ed7320c6f511ce95f40560feeb5531a_403	K_pneumoniae_6_02861
WP_002898198.1		YcbK family protein	6	6	1	1	4211				551	635	565	a177eae4552a0a1383f611870b669525_6962	40b06fe84ca1b8758d0c3f8a0dea34af_6432	20e8a30293b7b0c63abbc29d0c4c19ee_5488	6db8800965c51df47e711e72bf22185f_5512	0ed7320c6f511ce95f40560feeb5531a_5991	K_pneumoniae_6_00275
aroA		3-phosphoshikimate 1-carboxyvinyltransferase	6	6	1	1	4194				1283	1283	1283	a177eae4552a0a1383f611870b669525_6996	40b06fe84ca1b8758d0c3f8a0dea34af_6466	20e8a30293b7b0c63abbc29d0c4c19ee_5522	6db8800965c51df47e711e72bf22185f_5546	0ed7320c6f511ce95f40560feeb5531a_6025	K_pneumoniae_6_00293
WP_004180450.1		DNA cytosine methyltransferase	6	6	1	1	2350				1400	1400	1400	a177eae4552a0a1383f611870b669525_3724	40b06fe84ca1b8758d0c3f8a0dea34af_3121	20e8a30293b7b0c63abbc29d0c4c19ee_230	6db8800965c51df47e711e72bf22185f_5814	0ed7320c6f511ce95f40560feeb5531a_1704	K_pneumoniae_6_00895
group_2202	astD	succinylglutamate-semialdehyde dehydrogenase	6	6	1	1	2198				1478	1478	1478	a177eae4552a0a1383f611870b669525_6379	40b06fe84ca1b8758d0c3f8a0dea34af_5770	20e8a30293b7b0c63abbc29d0c4c19ee_6477	6db8800965c51df47e711e72bf22185f_6732	0ed7320c6f511ce95f40560feeb5531a_7272	K_pneumoniae_6_03189
zorA		anti-phage defense ZorAB system protein ZorA	6	6	1	1	1504				2189	2189	2189	a177eae4552a0a1383f611870b669525_8377	40b06fe84ca1b8758d0c3f8a0dea34af_7847	20e8a30293b7b0c63abbc29d0c4c19ee_5649	6db8800965c51df47e711e72bf22185f_112	0ed7320c6f511ce95f40560feeb5531a_112	K_pneumoniae_6_03003
WP_004144303.1		zinc ribbon domain-containing protein	6	6	1	1	734				218	218	218	a177eae4552a0a1383f611870b669525_2699	40b06fe84ca1b8758d0c3f8a0dea34af_2173	20e8a30293b7b0c63abbc29d0c4c19ee_1176	6db8800965c51df47e711e72bf22185f_2171	0ed7320c6f511ce95f40560feeb5531a_2650	K_pneumoniae_6_01349
WP_004213173.1		hypothetical protein	6	6	1	1	744				170	170	170	a177eae4552a0a1383f611870b669525_2681	40b06fe84ca1b8758d0c3f8a0dea34af_2155	20e8a30293b7b0c63abbc29d0c4c19ee_1194	6db8800965c51df47e711e72bf22185f_2189	0ed7320c6f511ce95f40560feeb5531a_2668	K_pneumoniae_6_01359
gspC		type II secretion system protein GspC	6	6	1	1	1613				842	842	842	a177eae4552a0a1383f611870b669525_8618	40b06fe84ca1b8758d0c3f8a0dea34af_8088	20e8a30293b7b0c63abbc29d0c4c19ee_4583	6db8800965c51df47e711e72bf22185f_4386	0ed7320c6f511ce95f40560feeb5531a_4865	K_pneumoniae_6_02777
WP_002916782.1		MFS transporter	6	6	1	1	3918				1418	1418	1418	a177eae4552a0a1383f611870b669525_1436	40b06fe84ca1b8758d0c3f8a0dea34af_815	20e8a30293b7b0c63abbc29d0c4c19ee_9661	6db8800965c51df47e711e72bf22185f_9649	0ed7320c6f511ce95f40560feeb5531a_9949	K_pneumoniae_6_04801
WP_002903730.1		GntR family transcriptional regulator	6	6	1	1	3777				686	686	686	a177eae4552a0a1383f611870b669525_5746	40b06fe84ca1b8758d0c3f8a0dea34af_4383	20e8a30293b7b0c63abbc29d0c4c19ee_10241	6db8800965c51df47e711e72bf22185f_10326	0ed7320c6f511ce95f40560feeb5531a_8491	K_pneumoniae_6_03762
thiB		thiamine ABC transporter substrate binding subunit	6	6	1	1	1709				983	983	983	a177eae4552a0a1383f611870b669525_8813	40b06fe84ca1b8758d0c3f8a0dea34af_8283	20e8a30293b7b0c63abbc29d0c4c19ee_4778	6db8800965c51df47e711e72bf22185f_4191	0ed7320c6f511ce95f40560feeb5531a_4670	K_pneumoniae_6_02682
nrdI		class Ib ribonucleoside-diphosphate reductase assembly flavoprotein NrdI	6	6	1	1	2002				410	410	410	a177eae4552a0a1383f611870b669525_2295	40b06fe84ca1b8758d0c3f8a0dea34af_1679	20e8a30293b7b0c63abbc29d0c4c19ee_3262	6db8800965c51df47e711e72bf22185f_3691	0ed7320c6f511ce95f40560feeb5531a_4170	K_pneumoniae_6_02442
WP_004181410.1		NAD(P)H-binding protein	6	6	1	1	5009				647	647	647	a177eae4552a0a1383f611870b669525_1169	40b06fe84ca1b8758d0c3f8a0dea34af_548	20e8a30293b7b0c63abbc29d0c4c19ee_6151	6db8800965c51df47e711e72bf22185f_6211	0ed7320c6f511ce95f40560feeb5531a_6614	K_pneumoniae_6_03515
WP_004178967.1		MbtH family NRPS accessory protein	6	6	1	1	1166				203	203	203	a177eae4552a0a1383f611870b669525_7687	40b06fe84ca1b8758d0c3f8a0dea34af_7157	20e8a30293b7b0c63abbc29d0c4c19ee_1694	6db8800965c51df47e711e72bf22185f_802	0ed7320c6f511ce95f40560feeb5531a_802	K_pneumoniae_6_00629
yghU		glutathione-dependent disulfide-bond oxidoreductase	6	6	1	1	3913				866	866	866	a177eae4552a0a1383f611870b669525_1446	40b06fe84ca1b8758d0c3f8a0dea34af_825	20e8a30293b7b0c63abbc29d0c4c19ee_9651	6db8800965c51df47e711e72bf22185f_9659	0ed7320c6f511ce95f40560feeb5531a_9959	K_pneumoniae_6_04796
WP_002903398.1		hypothetical protein	6	6	1	1	4136				158	158	158	a177eae4552a0a1383f611870b669525_5860	40b06fe84ca1b8758d0c3f8a0dea34af_4269	20e8a30293b7b0c63abbc29d0c4c19ee_6846	6db8800965c51df47e711e72bf22185f_7054	0ed7320c6f511ce95f40560feeb5531a_6950	K_pneumoniae_6_04120
WP_004181515.1		acyltransferase	6	6	1	1	3810				995	995	995	a177eae4552a0a1383f611870b669525_383	40b06fe84ca1b8758d0c3f8a0dea34af_10302	20e8a30293b7b0c63abbc29d0c4c19ee_7652	6db8800965c51df47e711e72bf22185f_7445	0ed7320c6f511ce95f40560feeb5531a_7776	K_pneumoniae_6_03715
eutC		ethanolamine ammonia-lyase subunit EutC	6	6	1	1	679				899	899	899	a177eae4552a0a1383f611870b669525_2811	40b06fe84ca1b8758d0c3f8a0dea34af_2285	20e8a30293b7b0c63abbc29d0c4c19ee_1064	6db8800965c51df47e711e72bf22185f_2059	0ed7320c6f511ce95f40560feeb5531a_2538	K_pneumoniae_6_01294
rpsB		30S ribosomal protein S2	6	6	1	1	1590				725	725	725	a177eae4552a0a1383f611870b669525_8570	40b06fe84ca1b8758d0c3f8a0dea34af_8040	20e8a30293b7b0c63abbc29d0c4c19ee_4535	6db8800965c51df47e711e72bf22185f_4434	0ed7320c6f511ce95f40560feeb5531a_4913	K_pneumoniae_6_02798
rpmG		50S ribosomal protein L33	6	6	1	1	224				167	167	167	a177eae4552a0a1383f611870b669525_275	40b06fe84ca1b8758d0c3f8a0dea34af_10194	20e8a30293b7b0c63abbc29d0c4c19ee_7544	6db8800965c51df47e711e72bf22185f_7553	0ed7320c6f511ce95f40560feeb5531a_7668	K_pneumoniae_6_03664
WP_002918397.1		calcium/sodium antiporter	6	6	1	1	5053				977	977	977	a177eae4552a0a1383f611870b669525_1073	40b06fe84ca1b8758d0c3f8a0dea34af_452	20e8a30293b7b0c63abbc29d0c4c19ee_6247	6db8800965c51df47e711e72bf22185f_6307	0ed7320c6f511ce95f40560feeb5531a_6710	K_pneumoniae_6_03469
trxB		thioredoxin-disulfide reductase	6	6	1	1	3792				968	995	972	a177eae4552a0a1383f611870b669525_7028	40b06fe84ca1b8758d0c3f8a0dea34af_6498	20e8a30293b7b0c63abbc29d0c4c19ee_10841	6db8800965c51df47e711e72bf22185f_1461	0ed7320c6f511ce95f40560feeb5531a_1461	K_pneumoniae_6_00309
bfr		bacterioferritin	6	6	1	1	5168				476	476	476	a177eae4552a0a1383f611870b669525_828	40b06fe84ca1b8758d0c3f8a0dea34af_207	20e8a30293b7b0c63abbc29d0c4c19ee_10737	6db8800965c51df47e711e72bf22185f_10822	0ed7320c6f511ce95f40560feeb5531a_10774	K_pneumoniae_6_05136
WP_004179129.1		glutathione S-transferase family protein	6	6	1	1	910				626	626	626	a177eae4552a0a1383f611870b669525_7130	40b06fe84ca1b8758d0c3f8a0dea34af_6600	20e8a30293b7b0c63abbc29d0c4c19ee_2251	6db8800965c51df47e711e72bf22185f_1359	0ed7320c6f511ce95f40560feeb5531a_1359	K_pneumoniae_6_00360
WP_004152190.1		MurR/RpiR family transcriptional regulator	6	6	1	1	5887				857	857	857	a177eae4552a0a1383f611870b669525_9298	40b06fe84ca1b8758d0c3f8a0dea34af_8768	20e8a30293b7b0c63abbc29d0c4c19ee_4394	6db8800965c51df47e711e72bf22185f_4575	0ed7320c6f511ce95f40560feeb5531a_5534	K_pneumoniae_6_01537
ansA		asparaginase	6	6	1	1	2218				1019	1019	1019	a177eae4552a0a1383f611870b669525_6419	40b06fe84ca1b8758d0c3f8a0dea34af_5810	20e8a30293b7b0c63abbc29d0c4c19ee_6437	6db8800965c51df47e711e72bf22185f_6772	0ed7320c6f511ce95f40560feeb5531a_7232	K_pneumoniae_6_03209
WP_004152640.1		plasmid SOS inhibition protein A	6	6	1	1	2478				728	728	728	a177eae4552a0a1383f611870b669525_10887	40b06fe84ca1b8758d0c3f8a0dea34af_10682	20e8a30293b7b0c63abbc29d0c4c19ee_11041	6db8800965c51df47e711e72bf22185f_11044	0ed7320c6f511ce95f40560feeb5531a_11044	K_pneumoniae_6_05314
WP_004179578.1		LysR family transcriptional regulator	6	6	1	1	4032				905	905	905	a177eae4552a0a1383f611870b669525_6068	40b06fe84ca1b8758d0c3f8a0dea34af_4059	20e8a30293b7b0c63abbc29d0c4c19ee_7054	6db8800965c51df47e711e72bf22185f_6846	0ed7320c6f511ce95f40560feeb5531a_7158	K_pneumoniae_6_04019
sad		succinate-semialdehyde dehydrogenase	6	6	1	1	2664				1388	1388	1388	a177eae4552a0a1383f611870b669525_5626	40b06fe84ca1b8758d0c3f8a0dea34af_4503	20e8a30293b7b0c63abbc29d0c4c19ee_10119	6db8800965c51df47e711e72bf22185f_10284	0ed7320c6f511ce95f40560feeb5531a_8611	K_pneumoniae_6_03819
ugpA		sn-glycerol-3-phosphate ABC transporter permease UgpA	6	6	1	1	3551				887	887	887	a177eae4552a0a1383f611870b669525_648	40b06fe84ca1b8758d0c3f8a0dea34af_27	20e8a30293b7b0c63abbc29d0c4c19ee_7262	6db8800965c51df47e711e72bf22185f_7261	0ed7320c6f511ce95f40560feeb5531a_8447	K_pneumoniae_6_04270
tyrR		transcriptional regulator TyrR	6	6	1	1	3262				1541	1541	1541	a177eae4552a0a1383f611870b669525_6192	40b06fe84ca1b8758d0c3f8a0dea34af_5583	20e8a30293b7b0c63abbc29d0c4c19ee_6664	6db8800965c51df47e711e72bf22185f_6545	0ed7320c6f511ce95f40560feeb5531a_7459	K_pneumoniae_6_03099
prs		ribose-phosphate diphosphokinase	6	6	1	1	4663				947	947	947	a177eae4552a0a1383f611870b669525_4265	40b06fe84ca1b8758d0c3f8a0dea34af_3660	20e8a30293b7b0c63abbc29d0c4c19ee_10061	6db8800965c51df47e711e72bf22185f_10117	0ed7320c6f511ce95f40560feeb5531a_6408	K_pneumoniae_6_03259
artP		arginine ABC transporter ATP-binding protein ArtP	6	6	1	1	882				728	794	739	a177eae4552a0a1383f611870b669525_7074	40b06fe84ca1b8758d0c3f8a0dea34af_6544	20e8a30293b7b0c63abbc29d0c4c19ee_2307	6db8800965c51df47e711e72bf22185f_1415	0ed7320c6f511ce95f40560feeb5531a_1415	K_pneumoniae_6_00333
hxpB		hexitol phosphatase HxpB	6	6	1	1	2180				668	668	668	a177eae4552a0a1383f611870b669525_6341	40b06fe84ca1b8758d0c3f8a0dea34af_5732	20e8a30293b7b0c63abbc29d0c4c19ee_6515	6db8800965c51df47e711e72bf22185f_6694	0ed7320c6f511ce95f40560feeb5531a_7310	K_pneumoniae_6_03171
WP_004181182.1		DUF2509 family protein	6	6	1	1	4499				407	407	407	a177eae4552a0a1383f611870b669525_1820	40b06fe84ca1b8758d0c3f8a0dea34af_1204	20e8a30293b7b0c63abbc29d0c4c19ee_3739	6db8800965c51df47e711e72bf22185f_3216	0ed7320c6f511ce95f40560feeb5531a_3695	K_pneumoniae_6_02213
WP_004179808.1		purine permease	6	6	1	1	2696				1379	1379	1379	a177eae4552a0a1383f611870b669525_5560	40b06fe84ca1b8758d0c3f8a0dea34af_4569	20e8a30293b7b0c63abbc29d0c4c19ee_10185	6db8800965c51df47e711e72bf22185f_10218	0ed7320c6f511ce95f40560feeb5531a_8677	K_pneumoniae_6_03851
pgl		6-phosphogluconolactonase	6	6	1	1	1008				995	995	995	a177eae4552a0a1383f611870b669525_7327	40b06fe84ca1b8758d0c3f8a0dea34af_6797	20e8a30293b7b0c63abbc29d0c4c19ee_2054	6db8800965c51df47e711e72bf22185f_1162	0ed7320c6f511ce95f40560feeb5531a_1162	K_pneumoniae_6_00458
WP_002912992.1		AI-2E family transporter	6	6	1	1	527				1109	1109	1109	a177eae4552a0a1383f611870b669525_3137	40b06fe84ca1b8758d0c3f8a0dea34af_2611	20e8a30293b7b0c63abbc29d0c4c19ee_738	6db8800965c51df47e711e72bf22185f_1733	0ed7320c6f511ce95f40560feeb5531a_2212	K_pneumoniae_6_01139
WP_002892195.1		Kef family K(+) transporter	6	6	1	1	1315				1676	1676	1676	a177eae4552a0a1383f611870b669525_7992	40b06fe84ca1b8758d0c3f8a0dea34af_7462	20e8a30293b7b0c63abbc29d0c4c19ee_1389	6db8800965c51df47e711e72bf22185f_497	0ed7320c6f511ce95f40560feeb5531a_497	K_pneumoniae_6_00774
ihfA		integration host factor subunit alpha	6	6	1	1	303				299	299	299	a177eae4552a0a1383f611870b669525_4424	40b06fe84ca1b8758d0c3f8a0dea34af_3816	20e8a30293b7b0c63abbc29d0c4c19ee_7869	6db8800965c51df47e711e72bf22185f_7807	0ed7320c6f511ce95f40560feeb5531a_6252	K_pneumoniae_6_03970
cysQ		3'(2'),5'-bisphosphate nucleotidase CysQ	6	6	1	1	5980				743	743	743	a177eae4552a0a1383f611870b669525_9432	40b06fe84ca1b8758d0c3f8a0dea34af_8902	20e8a30293b7b0c63abbc29d0c4c19ee_4260	6db8800965c51df47e711e72bf22185f_4709	0ed7320c6f511ce95f40560feeb5531a_5400	K_pneumoniae_6_01600
WP_004140612.1		sugar-binding transcriptional regulator	6	6	1	1	4388				962	962	962	a177eae4552a0a1383f611870b669525_6595	40b06fe84ca1b8758d0c3f8a0dea34af_6066	20e8a30293b7b0c63abbc29d0c4c19ee_5124	6db8800965c51df47e711e72bf22185f_5148	0ed7320c6f511ce95f40560feeb5531a_5627	K_pneumoniae_6_00100
dsbA		thiol:disulfide interchange protein DsbA	6	6	1	1	3087				623	623	623	a177eae4552a0a1383f611870b669525_10314	40b06fe84ca1b8758d0c3f8a0dea34af_9786	20e8a30293b7b0c63abbc29d0c4c19ee_8402	6db8800965c51df47e711e72bf22185f_8473	0ed7320c6f511ce95f40560feeb5531a_9088	K_pneumoniae_6_04361
group_224	artJ	arginine ABC transporter substrate-binding protein	6	6	1	1	883				731	752	734	a177eae4552a0a1383f611870b669525_7076	40b06fe84ca1b8758d0c3f8a0dea34af_6546	20e8a30293b7b0c63abbc29d0c4c19ee_2305	6db8800965c51df47e711e72bf22185f_1413	0ed7320c6f511ce95f40560feeb5531a_1413	K_pneumoniae_6_00334
WP_004181528.1		glycosyltransferase family 4 protein	6	6	1	1	217				1127	1127	1127	a177eae4552a0a1383f611870b669525_289	40b06fe84ca1b8758d0c3f8a0dea34af_10208	20e8a30293b7b0c63abbc29d0c4c19ee_7558	6db8800965c51df47e711e72bf22185f_7539	0ed7320c6f511ce95f40560feeb5531a_7682	K_pneumoniae_6_03671
mreC		rod shape-determining protein MreC	6	6	1	1	5106				992	992	992	a177eae4552a0a1383f611870b669525_967	40b06fe84ca1b8758d0c3f8a0dea34af_346	20e8a30293b7b0c63abbc29d0c4c19ee_6353	6db8800965c51df47e711e72bf22185f_6413	0ed7320c6f511ce95f40560feeb5531a_6816	K_pneumoniae_6_03417
WP_004179590.1		DeoR/GlpR family DNA-binding transcription regulator	6	6	1	1	4049				743	743	743	a177eae4552a0a1383f611870b669525_6034	40b06fe84ca1b8758d0c3f8a0dea34af_4093	20e8a30293b7b0c63abbc29d0c4c19ee_7020	6db8800965c51df47e711e72bf22185f_6880	0ed7320c6f511ce95f40560feeb5531a_7124	K_pneumoniae_6_04036
parC		DNA topoisomerase IV subunit A	6	6	1	1	3929				2258	2258	2258	a177eae4552a0a1383f611870b669525_1412	40b06fe84ca1b8758d0c3f8a0dea34af_791	20e8a30293b7b0c63abbc29d0c4c19ee_9687	6db8800965c51df47e711e72bf22185f_9625	0ed7320c6f511ce95f40560feeb5531a_9923	K_pneumoniae_6_04813
copA		copper-exporting P-type ATPase CopA	6	6	1	1	1310				2501	2501	2501	a177eae4552a0a1383f611870b669525_7982	40b06fe84ca1b8758d0c3f8a0dea34af_7452	20e8a30293b7b0c63abbc29d0c4c19ee_1399	6db8800965c51df47e711e72bf22185f_507	0ed7320c6f511ce95f40560feeb5531a_507	K_pneumoniae_6_00769
WP_004179671.1		pyridoxal phosphate-dependent aminotransferase	6	6	1	1	4114				1172	1172	1172	a177eae4552a0a1383f611870b669525_5904	40b06fe84ca1b8758d0c3f8a0dea34af_4225	20e8a30293b7b0c63abbc29d0c4c19ee_6890	6db8800965c51df47e711e72bf22185f_7010	0ed7320c6f511ce95f40560feeb5531a_6994	K_pneumoniae_6_04099
WP_002895750.1		glucose 1-dehydrogenase	6	6	1	1	956				749	749	749	a177eae4552a0a1383f611870b669525_7220	40b06fe84ca1b8758d0c3f8a0dea34af_6690	20e8a30293b7b0c63abbc29d0c4c19ee_2161	6db8800965c51df47e711e72bf22185f_1269	0ed7320c6f511ce95f40560feeb5531a_1269	K_pneumoniae_6_00406
WP_004181161.1		cobalt-precorrin-8 methylmutase	6	6	1	1	4464				635	635	635	a177eae4552a0a1383f611870b669525_1891	40b06fe84ca1b8758d0c3f8a0dea34af_1275	20e8a30293b7b0c63abbc29d0c4c19ee_3668	6db8800965c51df47e711e72bf22185f_3287	0ed7320c6f511ce95f40560feeb5531a_3766	K_pneumoniae_6_02248
WP_004196034.1		Bcr/CflA family multidrug efflux MFS transporter	6	6	1	1	5810				1181	1181	1181	a177eae4552a0a1383f611870b669525_4835	40b06fe84ca1b8758d0c3f8a0dea34af_5296	20e8a30293b7b0c63abbc29d0c4c19ee_2428	6db8800965c51df47e711e72bf22185f_2428	0ed7320c6f511ce95f40560feeb5531a_3498	K_pneumoniae_6_02129
WP_004152003.1		aldehyde dehydrogenase EutE	6	6	1	1	685				1403	1403	1403	a177eae4552a0a1383f611870b669525_2799	40b06fe84ca1b8758d0c3f8a0dea34af_2273	20e8a30293b7b0c63abbc29d0c4c19ee_1076	6db8800965c51df47e711e72bf22185f_2071	0ed7320c6f511ce95f40560feeb5531a_2550	K_pneumoniae_6_01300
potG		putrescine ABC transporter ATP-binding subunit PotG	6	6	1	1	893				1133	1166	1138	a177eae4552a0a1383f611870b669525_7096	40b06fe84ca1b8758d0c3f8a0dea34af_6566	20e8a30293b7b0c63abbc29d0c4c19ee_2285	6db8800965c51df47e711e72bf22185f_1393	0ed7320c6f511ce95f40560feeb5531a_1393	K_pneumoniae_6_00344
WP_004173949.1		AsmA family protein	6	6	1	1	3394				2051	2051	2051	a177eae4552a0a1383f611870b669525_486	40b06fe84ca1b8758d0c3f8a0dea34af_10405	20e8a30293b7b0c63abbc29d0c4c19ee_8856	6db8800965c51df47e711e72bf22185f_8927	0ed7320c6f511ce95f40560feeb5531a_9334	K_pneumoniae_6_04575
WP_043906901.1		fimbrial biogenesis usher protein	6	6	1	1	4559				2612	2612	2612	a177eae4552a0a1383f611870b669525_1700	40b06fe84ca1b8758d0c3f8a0dea34af_1084	20e8a30293b7b0c63abbc29d0c4c19ee_9518	6db8800965c51df47e711e72bf22185f_9603	0ed7320c6f511ce95f40560feeb5531a_9901	K_pneumoniae_6_04736
cvpA		colicin V production protein	6	6	1	1	603				488	488	488	a177eae4552a0a1383f611870b669525_2983	40b06fe84ca1b8758d0c3f8a0dea34af_2457	20e8a30293b7b0c63abbc29d0c4c19ee_892	6db8800965c51df47e711e72bf22185f_1887	0ed7320c6f511ce95f40560feeb5531a_2366	K_pneumoniae_6_01215
WP_004181490.1		magnesium transporter	6	6	1	1	3426				1013	1013	1013	a177eae4552a0a1383f611870b669525_558	40b06fe84ca1b8758d0c3f8a0dea34af_10477	20e8a30293b7b0c63abbc29d0c4c19ee_7351	6db8800965c51df47e711e72bf22185f_7172	0ed7320c6f511ce95f40560feeb5531a_10446	K_pneumoniae_6_04972
WP_043906913.1		type 1 fimbrial protein	6	6	1	1	2025				548	548	548	a177eae4552a0a1383f611870b669525_2341	40b06fe84ca1b8758d0c3f8a0dea34af_1725	20e8a30293b7b0c63abbc29d0c4c19ee_3216	6db8800965c51df47e711e72bf22185f_3737	0ed7320c6f511ce95f40560feeb5531a_4216	K_pneumoniae_6_02465
WP_002883021.1		YijD family membrane protein	6	6	1	1	3008				359	359	359	a177eae4552a0a1383f611870b669525_10158	40b06fe84ca1b8758d0c3f8a0dea34af_9630	20e8a30293b7b0c63abbc29d0c4c19ee_8558	6db8800965c51df47e711e72bf22185f_8629	0ed7320c6f511ce95f40560feeb5531a_8932	K_pneumoniae_6_04440
lapB		lipopolysaccharide assembly protein LapB	6	6	1	1	3232				1169	1169	1169	a177eae4552a0a1383f611870b669525_6252	40b06fe84ca1b8758d0c3f8a0dea34af_5643	20e8a30293b7b0c63abbc29d0c4c19ee_6604	6db8800965c51df47e711e72bf22185f_6605	0ed7320c6f511ce95f40560feeb5531a_7399	K_pneumoniae_6_03129
phnK		phosphonate C-P lyase system protein PhnK	6	6	1	1	104				758	758	758	a177eae4552a0a1383f611870b669525_9658	40b06fe84ca1b8758d0c3f8a0dea34af_9128	20e8a30293b7b0c63abbc29d0c4c19ee_4034	6db8800965c51df47e711e72bf22185f_4935	0ed7320c6f511ce95f40560feeb5531a_5174	K_pneumoniae_6_01708
cysT		sulfate/thiosulfate ABC transporter permease CysT	6	6	1	1	668				833	833	833	a177eae4552a0a1383f611870b669525_2835	40b06fe84ca1b8758d0c3f8a0dea34af_2309	20e8a30293b7b0c63abbc29d0c4c19ee_1040	6db8800965c51df47e711e72bf22185f_2035	0ed7320c6f511ce95f40560feeb5531a_2514	K_pneumoniae_6_01283
rlmF		23S rRNA (adenine(1618)-N(6))-methyltransferase RlmF	6	6	1	1	946				914	914	914	a177eae4552a0a1383f611870b669525_7200	40b06fe84ca1b8758d0c3f8a0dea34af_6670	20e8a30293b7b0c63abbc29d0c4c19ee_2181	6db8800965c51df47e711e72bf22185f_1289	0ed7320c6f511ce95f40560feeb5531a_1289	K_pneumoniae_6_00396
WP_020802532.1		LacI family transcriptional regulator	6	6	1	1	926				1130	1244	1149	a177eae4552a0a1383f611870b669525_7162	40b06fe84ca1b8758d0c3f8a0dea34af_6632	20e8a30293b7b0c63abbc29d0c4c19ee_2219	6db8800965c51df47e711e72bf22185f_1327	0ed7320c6f511ce95f40560feeb5531a_1327	K_pneumoniae_6_00376
ispG		flavodoxin-dependent (E)-4-hydroxy-3-methylbut-2-enyl-diphosphate synthase	6	6	1	1	764				1121	1121	1121	a177eae4552a0a1383f611870b669525_2639	40b06fe84ca1b8758d0c3f8a0dea34af_2113	20e8a30293b7b0c63abbc29d0c4c19ee_1236	6db8800965c51df47e711e72bf22185f_2231	0ed7320c6f511ce95f40560feeb5531a_2710	K_pneumoniae_6_01377
WP_004179128.1		PQQ-dependent sugar dehydrogenase	6	6	1	1	911				1109	1109	1109	a177eae4552a0a1383f611870b669525_7132	40b06fe84ca1b8758d0c3f8a0dea34af_6602	20e8a30293b7b0c63abbc29d0c4c19ee_2249	6db8800965c51df47e711e72bf22185f_1357	0ed7320c6f511ce95f40560feeb5531a_1357	K_pneumoniae_6_00361
WP_004180119.1		glutathione S-transferase family protein	6	6	1	1	5700				617	617	617	a177eae4552a0a1383f611870b669525_5055	40b06fe84ca1b8758d0c3f8a0dea34af_5076	20e8a30293b7b0c63abbc29d0c4c19ee_2648	6db8800965c51df47e711e72bf22185f_2648	0ed7320c6f511ce95f40560feeb5531a_3278	K_pneumoniae_6_02023
WP_004177687.1		hypothetical protein	6	6	1	1	5971				674	674	674	a177eae4552a0a1383f611870b669525_9450	40b06fe84ca1b8758d0c3f8a0dea34af_8920	20e8a30293b7b0c63abbc29d0c4c19ee_4242	6db8800965c51df47e711e72bf22185f_4727	0ed7320c6f511ce95f40560feeb5531a_5382	K_pneumoniae_6_01609
WP_004178233.1		Rsd/AlgQ family anti-sigma factor	6	6	1	1	4927				497	497	497	a177eae4552a0a1383f611870b669525_9888	40b06fe84ca1b8758d0c3f8a0dea34af_9360	20e8a30293b7b0c63abbc29d0c4c19ee_10627	6db8800965c51df47e711e72bf22185f_10712	0ed7320c6f511ce95f40560feeb5531a_10664	K_pneumoniae_6_05089
WP_004144843.1		M48 family metallopeptidase	6	6	1	1	4973				500	500	500	a177eae4552a0a1383f611870b669525_1240	40b06fe84ca1b8758d0c3f8a0dea34af_619	20e8a30293b7b0c63abbc29d0c4c19ee_6080	6db8800965c51df47e711e72bf22185f_6140	0ed7320c6f511ce95f40560feeb5531a_6543	K_pneumoniae_6_03551
cas7e		type I-E CRISPR-associated protein Cas7/Cse4/CasC	6	6	1	1	402				1034	1034	1034	a177eae4552a0a1383f611870b669525_4626	40b06fe84ca1b8758d0c3f8a0dea34af_4018	20e8a30293b7b0c63abbc29d0c4c19ee_7667	6db8800965c51df47e711e72bf22185f_8009	0ed7320c6f511ce95f40560feeb5531a_6050	K_pneumoniae_6_03872
hscB		co-chaperone HscB	6	6	1	1	777				515	515	515	a177eae4552a0a1383f611870b669525_2613	40b06fe84ca1b8758d0c3f8a0dea34af_2087	20e8a30293b7b0c63abbc29d0c4c19ee_1262	6db8800965c51df47e711e72bf22185f_2257	0ed7320c6f511ce95f40560feeb5531a_2736	K_pneumoniae_6_01390
WP_004181640.1		YifB family Mg chelatase-like AAA ATPase	6	6	1	1	3002				1520	1520	1520	a177eae4552a0a1383f611870b669525_10124	40b06fe84ca1b8758d0c3f8a0dea34af_9596	20e8a30293b7b0c63abbc29d0c4c19ee_9060	6db8800965c51df47e711e72bf22185f_8976	0ed7320c6f511ce95f40560feeb5531a_9591	K_pneumoniae_6_04522
WP_004144842.1		XRE family transcriptional regulator	6	6	1	1	4972				602	602	602	a177eae4552a0a1383f611870b669525_1242	40b06fe84ca1b8758d0c3f8a0dea34af_621	20e8a30293b7b0c63abbc29d0c4c19ee_6078	6db8800965c51df47e711e72bf22185f_6138	0ed7320c6f511ce95f40560feeb5531a_6541	K_pneumoniae_6_03552
ldtB		L,D-transpeptidase	6	6	1	1	931				914	989	926	a177eae4552a0a1383f611870b669525_7172	40b06fe84ca1b8758d0c3f8a0dea34af_6642	20e8a30293b7b0c63abbc29d0c4c19ee_2209	6db8800965c51df47e711e72bf22185f_1317	0ed7320c6f511ce95f40560feeb5531a_1317	K_pneumoniae_6_00381
group_2270	map	type I methionyl aminopeptidase	6	6	1	1	2707				782	782	782	a177eae4552a0a1383f611870b669525_5538	40b06fe84ca1b8758d0c3f8a0dea34af_4591	20e8a30293b7b0c63abbc29d0c4c19ee_10207	6db8800965c51df47e711e72bf22185f_10196	0ed7320c6f511ce95f40560feeb5531a_8699	K_pneumoniae_6_03862
lpdA		dihydrolipoyl dehydrogenase	6	6	1	1	1510				1397	1397	1397	a177eae4552a0a1383f611870b669525_8389	40b06fe84ca1b8758d0c3f8a0dea34af_7859	20e8a30293b7b0c63abbc29d0c4c19ee_5637	6db8800965c51df47e711e72bf22185f_100	0ed7320c6f511ce95f40560feeb5531a_100	K_pneumoniae_6_03009
mglC		galactose/methyl galactoside ABC transporter permease MglC	6	6	1	1	487				1010	1010	1010	a177eae4552a0a1383f611870b669525_3220	40b06fe84ca1b8758d0c3f8a0dea34af_2694	20e8a30293b7b0c63abbc29d0c4c19ee_655	6db8800965c51df47e711e72bf22185f_1650	0ed7320c6f511ce95f40560feeb5531a_2129	K_pneumoniae_6_01098
WP_002891647.1		lipoprotein	6	6	1	1	1379				578	578	578	a177eae4552a0a1383f611870b669525_8124	40b06fe84ca1b8758d0c3f8a0dea34af_7594	20e8a30293b7b0c63abbc29d0c4c19ee_5902	6db8800965c51df47e711e72bf22185f_365	0ed7320c6f511ce95f40560feeb5531a_365	K_pneumoniae_6_02880
WP_004152599.1		conjugal transfer protein TraP	6	6	1	1	3116				596	596	596	a177eae4552a0a1383f611870b669525_10837	40b06fe84ca1b8758d0c3f8a0dea34af_10732	20e8a30293b7b0c63abbc29d0c4c19ee_9239	6db8800965c51df47e711e72bf22185f_9162	0ed7320c6f511ce95f40560feeb5531a_9734	K_pneumoniae_6_04655
waaA		lipid IV(A) 3-deoxy-D-manno-octulosonic acid transferase	6	6	1	1	220				1274	1274	1274	a177eae4552a0a1383f611870b669525_283	40b06fe84ca1b8758d0c3f8a0dea34af_10202	20e8a30293b7b0c63abbc29d0c4c19ee_7552	6db8800965c51df47e711e72bf22185f_7545	0ed7320c6f511ce95f40560feeb5531a_7676	K_pneumoniae_6_03668
pgtB		two-component system sensor histidine kinase PgtB	6	6	1	1	5516				1994	1994	1994	a177eae4552a0a1383f611870b669525_5426	40b06fe84ca1b8758d0c3f8a0dea34af_4705	20e8a30293b7b0c63abbc29d0c4c19ee_3020	6db8800965c51df47e711e72bf22185f_3020	0ed7320c6f511ce95f40560feeb5531a_2906	K_pneumoniae_6_01848
WP_004179632.1		YdbH family protein	6	6	1	1	4061				2639	2639	2639	a177eae4552a0a1383f611870b669525_6010	40b06fe84ca1b8758d0c3f8a0dea34af_4117	20e8a30293b7b0c63abbc29d0c4c19ee_6996	6db8800965c51df47e711e72bf22185f_6904	0ed7320c6f511ce95f40560feeb5531a_7100	K_pneumoniae_6_04048
WP_004152639.1		hypothetical protein	6	6	1	1	2479				326	326	326	a177eae4552a0a1383f611870b669525_10885	40b06fe84ca1b8758d0c3f8a0dea34af_10684	20e8a30293b7b0c63abbc29d0c4c19ee_11043	6db8800965c51df47e711e72bf22185f_11042	0ed7320c6f511ce95f40560feeb5531a_11042	K_pneumoniae_6_05313
WP_002913440.1		DUF3820 family protein	6	6	1	1	653				218	218	218	a177eae4552a0a1383f611870b669525_2865	40b06fe84ca1b8758d0c3f8a0dea34af_2339	20e8a30293b7b0c63abbc29d0c4c19ee_1010	6db8800965c51df47e711e72bf22185f_2005	0ed7320c6f511ce95f40560feeb5531a_2484	K_pneumoniae_6_01268
WP_002895847.1		phosphoethanolamine transferase	6	6	1	1	938				1076	1580	1496	a177eae4552a0a1383f611870b669525_7184	40b06fe84ca1b8758d0c3f8a0dea34af_6654	20e8a30293b7b0c63abbc29d0c4c19ee_2197	6db8800965c51df47e711e72bf22185f_1305	0ed7320c6f511ce95f40560feeb5531a_1305	K_pneumoniae_6_00388
WP_004178993.1		histidine phosphatase family protein	6	6	1	1	1142				1268	1268	1268	a177eae4552a0a1383f611870b669525_7639	40b06fe84ca1b8758d0c3f8a0dea34af_7109	20e8a30293b7b0c63abbc29d0c4c19ee_1742	6db8800965c51df47e711e72bf22185f_850	0ed7320c6f511ce95f40560feeb5531a_850	K_pneumoniae_6_00605
tilS		tRNA lysidine(34) synthetase TilS	6	6	1	1	1571				1313	1313	1313	a177eae4552a0a1383f611870b669525_8532	40b06fe84ca1b8758d0c3f8a0dea34af_8002	20e8a30293b7b0c63abbc29d0c4c19ee_4497	6db8800965c51df47e711e72bf22185f_4472	0ed7320c6f511ce95f40560feeb5531a_4951	K_pneumoniae_6_02817
rhaM		L-rhamnose mutarotase	6	6	1	1	3056				314	314	314	a177eae4552a0a1383f611870b669525_10254	40b06fe84ca1b8758d0c3f8a0dea34af_9726	20e8a30293b7b0c63abbc29d0c4c19ee_8462	6db8800965c51df47e711e72bf22185f_8533	0ed7320c6f511ce95f40560feeb5531a_9028	K_pneumoniae_6_04392
WP_004180086.1		hypothetical protein	6	6	1	1	5667				185	185	185	a177eae4552a0a1383f611870b669525_5119	40b06fe84ca1b8758d0c3f8a0dea34af_5012	20e8a30293b7b0c63abbc29d0c4c19ee_2712	6db8800965c51df47e711e72bf22185f_2712	0ed7320c6f511ce95f40560feeb5531a_3214	K_pneumoniae_6_01991
WP_004143781.1		DUF2554 family protein	6	6	1	1	5742				230	230	230	a177eae4552a0a1383f611870b669525_4971	40b06fe84ca1b8758d0c3f8a0dea34af_5160	20e8a30293b7b0c63abbc29d0c4c19ee_2564	6db8800965c51df47e711e72bf22185f_2564	0ed7320c6f511ce95f40560feeb5531a_3362	K_pneumoniae_6_02062
WP_004178715.1		amino acid ABC transporter permease	6	6	1	1	1483				752	752	752	a177eae4552a0a1383f611870b669525_8332	40b06fe84ca1b8758d0c3f8a0dea34af_7802	20e8a30293b7b0c63abbc29d0c4c19ee_5694	6db8800965c51df47e711e72bf22185f_157	0ed7320c6f511ce95f40560feeb5531a_157	K_pneumoniae_6_02981
modA		molybdate ABC transporter substrate-binding protein	6	6	1	1	1012				773	773	773	a177eae4552a0a1383f611870b669525_7335	40b06fe84ca1b8758d0c3f8a0dea34af_6805	20e8a30293b7b0c63abbc29d0c4c19ee_2046	6db8800965c51df47e711e72bf22185f_1154	0ed7320c6f511ce95f40560feeb5531a_1154	K_pneumoniae_6_00462
sseB		enhanced serine sensitivity protein SseB	6	6	1	1	772				776	776	776	a177eae4552a0a1383f611870b669525_2623	40b06fe84ca1b8758d0c3f8a0dea34af_2097	20e8a30293b7b0c63abbc29d0c4c19ee_1252	6db8800965c51df47e711e72bf22185f_2247	0ed7320c6f511ce95f40560feeb5531a_2726	K_pneumoniae_6_01385
metJ		met regulon transcriptional regulator MetJ	6	6	1	1	3029				317	317	317	a177eae4552a0a1383f611870b669525_10200	40b06fe84ca1b8758d0c3f8a0dea34af_9672	20e8a30293b7b0c63abbc29d0c4c19ee_8516	6db8800965c51df47e711e72bf22185f_8587	0ed7320c6f511ce95f40560feeb5531a_8974	K_pneumoniae_6_04419
WP_023286280.1		DUF977 family protein	6	6	1	1	2108				335	335	335	a177eae4552a0a1383f611870b669525_2525	40b06fe84ca1b8758d0c3f8a0dea34af_1909	20e8a30293b7b0c63abbc29d0c4c19ee_9906	6db8800965c51df47e711e72bf22185f_9991	0ed7320c6f511ce95f40560feeb5531a_10289	K_pneumoniae_6_04909
hutI		imidazolonepropionase	6	6	1	1	992				1217	1319	1302	a177eae4552a0a1383f611870b669525_7295	40b06fe84ca1b8758d0c3f8a0dea34af_6765	20e8a30293b7b0c63abbc29d0c4c19ee_2086	6db8800965c51df47e711e72bf22185f_1194	0ed7320c6f511ce95f40560feeb5531a_1194	K_pneumoniae_6_00442
ispB		octaprenyl diphosphate synthase	6	6	1	1	5044				971	971	971	a177eae4552a0a1383f611870b669525_1091	40b06fe84ca1b8758d0c3f8a0dea34af_470	20e8a30293b7b0c63abbc29d0c4c19ee_6229	6db8800965c51df47e711e72bf22185f_6289	0ed7320c6f511ce95f40560feeb5531a_6692	K_pneumoniae_6_03478
WP_002910028.1		hypothetical protein	6	6	1	1	295				233	233	233	a177eae4552a0a1383f611870b669525_4407	40b06fe84ca1b8758d0c3f8a0dea34af_3799	20e8a30293b7b0c63abbc29d0c4c19ee_7886	6db8800965c51df47e711e72bf22185f_7790	0ed7320c6f511ce95f40560feeb5531a_6269	K_pneumoniae_6_03977
WP_004145418.1		ABC transporter ATP-binding protein	6	6	1	1	4646				788	788	788	a177eae4552a0a1383f611870b669525_4299	40b06fe84ca1b8758d0c3f8a0dea34af_3694	20e8a30293b7b0c63abbc29d0c4c19ee_10027	6db8800965c51df47e711e72bf22185f_10151	0ed7320c6f511ce95f40560feeb5531a_6374	K_pneumoniae_6_03242
WP_004181408.1		MFS transporter	6	6	1	1	5001				1331	1331	1331	a177eae4552a0a1383f611870b669525_1185	40b06fe84ca1b8758d0c3f8a0dea34af_564	20e8a30293b7b0c63abbc29d0c4c19ee_6135	6db8800965c51df47e711e72bf22185f_6195	0ed7320c6f511ce95f40560feeb5531a_6598	K_pneumoniae_6_03524
ldtA		L,D-transpeptidase	6	6	1	1	2856				941	941	941	a177eae4552a0a1383f611870b669525_3539	40b06fe84ca1b8758d0c3f8a0dea34af_3101	20e8a30293b7b0c63abbc29d0c4c19ee_250	6db8800965c51df47e711e72bf22185f_5794	0ed7320c6f511ce95f40560feeb5531a_1724	K_pneumoniae_6_00905
WP_004178900.1		cation-transporting P-type ATPase	6	6	1	1	1213				2723	2723	2723	a177eae4552a0a1383f611870b669525_7783	40b06fe84ca1b8758d0c3f8a0dea34af_7253	20e8a30293b7b0c63abbc29d0c4c19ee_1598	6db8800965c51df47e711e72bf22185f_706	0ed7320c6f511ce95f40560feeb5531a_706	K_pneumoniae_6_00676
WP_002906796.1		GNAT family N-acetyltransferase	6	6	1	1	5721				518	518	518	a177eae4552a0a1383f611870b669525_5015	40b06fe84ca1b8758d0c3f8a0dea34af_5116	20e8a30293b7b0c63abbc29d0c4c19ee_2608	6db8800965c51df47e711e72bf22185f_2608	0ed7320c6f511ce95f40560feeb5531a_3318	K_pneumoniae_6_02043
feoC		[Fe-S]-dependent transcriptional repressor FeoC	6	6	1	1	3519				239	239	239	a177eae4552a0a1383f611870b669525_712	40b06fe84ca1b8758d0c3f8a0dea34af_91	20e8a30293b7b0c63abbc29d0c4c19ee_7198	6db8800965c51df47e711e72bf22185f_7325	0ed7320c6f511ce95f40560feeb5531a_8383	K_pneumoniae_6_04301
WP_043906730.1		hypothetical protein	6	6	1	1	2283				686	686	686	a177eae4552a0a1383f611870b669525_3875	40b06fe84ca1b8758d0c3f8a0dea34af_3272	20e8a30293b7b0c63abbc29d0c4c19ee_79	6db8800965c51df47e711e72bf22185f_5965	0ed7320c6f511ce95f40560feeb5531a_1553	K_pneumoniae_6_00824
WP_004180313.1		VOC family protein	6	6	1	1	390				434	434	434	a177eae4552a0a1383f611870b669525_4601	40b06fe84ca1b8758d0c3f8a0dea34af_3993	20e8a30293b7b0c63abbc29d0c4c19ee_7692	6db8800965c51df47e711e72bf22185f_7984	0ed7320c6f511ce95f40560feeb5531a_6075	K_pneumoniae_6_03885
WP_072157842.1		acyltransferase family protein	6	6	1	1	998				923	965	930	a177eae4552a0a1383f611870b669525_7307	40b06fe84ca1b8758d0c3f8a0dea34af_6777	20e8a30293b7b0c63abbc29d0c4c19ee_2074	6db8800965c51df47e711e72bf22185f_1182	0ed7320c6f511ce95f40560feeb5531a_1182	K_pneumoniae_6_00449
WP_004181233.1		protein YgfX	6	6	1	1	4599				410	410	410	a177eae4552a0a1383f611870b669525_1620	40b06fe84ca1b8758d0c3f8a0dea34af_1004	20e8a30293b7b0c63abbc29d0c4c19ee_9438	6db8800965c51df47e711e72bf22185f_9523	0ed7320c6f511ce95f40560feeb5531a_9821	K_pneumoniae_6_04697
rluF		23S rRNA pseudouridine(2604) synthase RluF	6	6	1	1	4906				875	875	875	a177eae4552a0a1383f611870b669525_9834	40b06fe84ca1b8758d0c3f8a0dea34af_9306	20e8a30293b7b0c63abbc29d0c4c19ee_3857	6db8800965c51df47e711e72bf22185f_5112	0ed7320c6f511ce95f40560feeb5531a_4997	K_pneumoniae_6_01794
pgtP		phosphoglycerate transporter PgtP	6	6	1	1	5518				1391	1391	1391	a177eae4552a0a1383f611870b669525_5422	40b06fe84ca1b8758d0c3f8a0dea34af_4709	20e8a30293b7b0c63abbc29d0c4c19ee_3016	6db8800965c51df47e711e72bf22185f_3016	0ed7320c6f511ce95f40560feeb5531a_2910	K_pneumoniae_6_01850
WP_043906843.1		helix-turn-helix domain-containing protein	6	6	1	1	1387				758	758	758	a177eae4552a0a1383f611870b669525_8140	40b06fe84ca1b8758d0c3f8a0dea34af_7610	20e8a30293b7b0c63abbc29d0c4c19ee_5886	6db8800965c51df47e711e72bf22185f_349	0ed7320c6f511ce95f40560feeb5531a_349	K_pneumoniae_6_02888
fabG		3-oxoacyl-ACP reductase FabG	6	6	1	1	26				734	734	734	a177eae4552a0a1383f611870b669525_5492	40b06fe84ca1b8758d0c3f8a0dea34af_4637	20e8a30293b7b0c63abbc29d0c4c19ee_3086	6db8800965c51df47e711e72bf22185f_3086	0ed7320c6f511ce95f40560feeb5531a_2840	K_pneumoniae_6_01818
WP_002885172.1		ribose ABC transporter permease	6	6	1	1	112				998	998	998	a177eae4552a0a1383f611870b669525_9674	40b06fe84ca1b8758d0c3f8a0dea34af_9144	20e8a30293b7b0c63abbc29d0c4c19ee_4018	6db8800965c51df47e711e72bf22185f_4951	0ed7320c6f511ce95f40560feeb5531a_5158	K_pneumoniae_6_01716
WP_004142505.1		ABC transporter permease	6	6	1	1	1191				833	833	833	a177eae4552a0a1383f611870b669525_7739	40b06fe84ca1b8758d0c3f8a0dea34af_7209	20e8a30293b7b0c63abbc29d0c4c19ee_1642	6db8800965c51df47e711e72bf22185f_750	0ed7320c6f511ce95f40560feeb5531a_750	K_pneumoniae_6_00654
guaB		IMP dehydrogenase	6	6	1	1	732				1466	1466	1466	a177eae4552a0a1383f611870b669525_2703	40b06fe84ca1b8758d0c3f8a0dea34af_2177	20e8a30293b7b0c63abbc29d0c4c19ee_1172	6db8800965c51df47e711e72bf22185f_2167	0ed7320c6f511ce95f40560feeb5531a_2646	K_pneumoniae_6_01347
rplR		50S ribosomal protein L18	6	6	1	1	5149				353	353	353	a177eae4552a0a1383f611870b669525_866	40b06fe84ca1b8758d0c3f8a0dea34af_245	20e8a30293b7b0c63abbc29d0c4c19ee_10775	6db8800965c51df47e711e72bf22185f_10860	0ed7320c6f511ce95f40560feeb5531a_10812	K_pneumoniae_6_05155
WP_004151245.1		SDR family oxidoreductase	6	6	1	1	5639				995	995	995	a177eae4552a0a1383f611870b669525_5177	40b06fe84ca1b8758d0c3f8a0dea34af_4954	20e8a30293b7b0c63abbc29d0c4c19ee_2770	6db8800965c51df47e711e72bf22185f_2770	0ed7320c6f511ce95f40560feeb5531a_3156	K_pneumoniae_6_01966
seqA		replication initiation negative regulator SeqA	6	6	1	1	1065				548	692	572	a177eae4552a0a1383f611870b669525_7464	40b06fe84ca1b8758d0c3f8a0dea34af_6934	20e8a30293b7b0c63abbc29d0c4c19ee_1917	6db8800965c51df47e711e72bf22185f_1025	0ed7320c6f511ce95f40560feeb5531a_1025	K_pneumoniae_6_00521
pduD		propanediol dehydratase medium subunit PduD	6	6	1	1	4472				689	689	689	a177eae4552a0a1383f611870b669525_1874	40b06fe84ca1b8758d0c3f8a0dea34af_1258	20e8a30293b7b0c63abbc29d0c4c19ee_3685	6db8800965c51df47e711e72bf22185f_3270	0ed7320c6f511ce95f40560feeb5531a_3749	K_pneumoniae_6_02240
WP_004181200.1		LacI family DNA-binding transcriptional regulator	6	6	1	1	4531				995	995	995	a177eae4552a0a1383f611870b669525_1754	40b06fe84ca1b8758d0c3f8a0dea34af_1138	20e8a30293b7b0c63abbc29d0c4c19ee_3805	6db8800965c51df47e711e72bf22185f_3150	0ed7320c6f511ce95f40560feeb5531a_3629	K_pneumoniae_6_02183
WP_004178880.1		SDR family oxidoreductase	6	6	1	1	1247				776	776	776	a177eae4552a0a1383f611870b669525_7849	40b06fe84ca1b8758d0c3f8a0dea34af_7319	20e8a30293b7b0c63abbc29d0c4c19ee_1532	6db8800965c51df47e711e72bf22185f_640	0ed7320c6f511ce95f40560feeb5531a_640	K_pneumoniae_6_00710
tssK		type VI secretion system baseplate subunit TssK	6	6	1	1	3280				1343	1343	1343	a177eae4552a0a1383f611870b669525_6124	40b06fe84ca1b8758d0c3f8a0dea34af_5515	20e8a30293b7b0c63abbc29d0c4c19ee_6732	6db8800965c51df47e711e72bf22185f_6477	0ed7320c6f511ce95f40560feeb5531a_10886	K_pneumoniae_6_03067
aspS		aspartate--tRNA ligase	6	6	1	1	5388				1787	1787	1787	a177eae4552a0a1383f611870b669525_3975	40b06fe84ca1b8758d0c3f8a0dea34af_3366	20e8a30293b7b0c63abbc29d0c4c19ee_10517	6db8800965c51df47e711e72bf22185f_10528	0ed7320c6f511ce95f40560feeb5531a_8028	K_pneumoniae_6_03393
cspE		transcription antiterminator/RNA stability regulator CspE	6	6	1	1	1112				209	209	209	a177eae4552a0a1383f611870b669525_7579	40b06fe84ca1b8758d0c3f8a0dea34af_7049	20e8a30293b7b0c63abbc29d0c4c19ee_1802	6db8800965c51df47e711e72bf22185f_910	0ed7320c6f511ce95f40560feeb5531a_910	K_pneumoniae_6_00575
WP_002915888.1		prepilin-type N-terminal cleavage/methylation domain-containing protein	6	6	1	1	4498				323	323	323	a177eae4552a0a1383f611870b669525_1822	40b06fe84ca1b8758d0c3f8a0dea34af_1206	20e8a30293b7b0c63abbc29d0c4c19ee_3737	6db8800965c51df47e711e72bf22185f_3218	0ed7320c6f511ce95f40560feeb5531a_3697	K_pneumoniae_6_02214
WP_004176405.1		YitT family protein	6	6	1	1	4043				614	614	614	a177eae4552a0a1383f611870b669525_6046	40b06fe84ca1b8758d0c3f8a0dea34af_4081	20e8a30293b7b0c63abbc29d0c4c19ee_7032	6db8800965c51df47e711e72bf22185f_6868	0ed7320c6f511ce95f40560feeb5531a_7136	K_pneumoniae_6_04030
WP_002889854.1		2-hydroxyacid dehydrogenase	6	6	1	1	1516				995	995	995	a177eae4552a0a1383f611870b669525_8401	40b06fe84ca1b8758d0c3f8a0dea34af_7871	20e8a30293b7b0c63abbc29d0c4c19ee_5625	6db8800965c51df47e711e72bf22185f_88	0ed7320c6f511ce95f40560feeb5531a_88	K_pneumoniae_6_03015
WP_004181602.1		glucosamine-6-phosphate deaminase	6	6	1	1	4759				716	716	716	a177eae4552a0a1383f611870b669525_10434	40b06fe84ca1b8758d0c3f8a0dea34af_10156	20e8a30293b7b0c63abbc29d0c4c19ee_9816	6db8800965c51df47e711e72bf22185f_9901	0ed7320c6f511ce95f40560feeb5531a_10090	K_pneumoniae_6_01435
group_232		MFS transporter	6	6	1	1	1070				422	515	437	a177eae4552a0a1383f611870b669525_7474	40b06fe84ca1b8758d0c3f8a0dea34af_6944	20e8a30293b7b0c63abbc29d0c4c19ee_1907	6db8800965c51df47e711e72bf22185f_1015	0ed7320c6f511ce95f40560feeb5531a_1015	K_pneumoniae_6_00526
ruvC		crossover junction endodeoxyribonuclease RuvC	6	6	1	1	5385				521	521	521	a177eae4552a0a1383f611870b669525_3981	40b06fe84ca1b8758d0c3f8a0dea34af_3372	20e8a30293b7b0c63abbc29d0c4c19ee_10511	6db8800965c51df47e711e72bf22185f_10534	0ed7320c6f511ce95f40560feeb5531a_8022	K_pneumoniae_6_03390
WP_004142865.1		sigma-54-dependent Fis family transcriptional regulator	6	6	1	1	4417				1943	1943	1943	a177eae4552a0a1383f611870b669525_1996	40b06fe84ca1b8758d0c3f8a0dea34af_1380	20e8a30293b7b0c63abbc29d0c4c19ee_3563	6db8800965c51df47e711e72bf22185f_3392	0ed7320c6f511ce95f40560feeb5531a_3871	K_pneumoniae_6_02296
kmrA		efflux MFS transporter KmrA	6	6	1	1	5682				1499	1499	1499	a177eae4552a0a1383f611870b669525_5091	40b06fe84ca1b8758d0c3f8a0dea34af_5040	20e8a30293b7b0c63abbc29d0c4c19ee_2684	6db8800965c51df47e711e72bf22185f_2684	0ed7320c6f511ce95f40560feeb5531a_3242	K_pneumoniae_6_02005
WP_013214042.1		type I restriction-modification system subunit M	6	6	1	1	3146				1523	1523	1523	a177eae4552a0a1383f611870b669525_10772	40b06fe84ca1b8758d0c3f8a0dea34af_10796	20e8a30293b7b0c63abbc29d0c4c19ee_9303	6db8800965c51df47e711e72bf22185f_9226	0ed7320c6f511ce95f40560feeb5531a_9670	K_pneumoniae_6_04625
group_2324	ptsP	phosphoenolpyruvate--protein phosphotransferase	6	6	1	1	4504				2246	2246	2246	a177eae4552a0a1383f611870b669525_1810	40b06fe84ca1b8758d0c3f8a0dea34af_1194	20e8a30293b7b0c63abbc29d0c4c19ee_3749	6db8800965c51df47e711e72bf22185f_3206	0ed7320c6f511ce95f40560feeb5531a_3685	K_pneumoniae_6_02208
lplT		lysophospholipid transporter LplT	6	6	1	1	4511				1193	1193	1193	a177eae4552a0a1383f611870b669525_1796	40b06fe84ca1b8758d0c3f8a0dea34af_1180	20e8a30293b7b0c63abbc29d0c4c19ee_3763	6db8800965c51df47e711e72bf22185f_3192	0ed7320c6f511ce95f40560feeb5531a_3671	K_pneumoniae_6_02202
WP_004151623.1		D-threonate 4-phosphate dehydrogenase	6	6	1	1	2659				986	986	986	a177eae4552a0a1383f611870b669525_5636	40b06fe84ca1b8758d0c3f8a0dea34af_4493	20e8a30293b7b0c63abbc29d0c4c19ee_10109	6db8800965c51df47e711e72bf22185f_10294	0ed7320c6f511ce95f40560feeb5531a_8601	K_pneumoniae_6_03814
priB		primosomal replication protein N	6	6	1	1	5968				314	314	314	a177eae4552a0a1383f611870b669525_9456	40b06fe84ca1b8758d0c3f8a0dea34af_8926	20e8a30293b7b0c63abbc29d0c4c19ee_4236	6db8800965c51df47e711e72bf22185f_4733	0ed7320c6f511ce95f40560feeb5531a_5376	K_pneumoniae_6_01612
WP_004181517.1		4Fe-4S binding protein	6	6	1	1	185				485	485	485	a177eae4552a0a1383f611870b669525_359	40b06fe84ca1b8758d0c3f8a0dea34af_10278	20e8a30293b7b0c63abbc29d0c4c19ee_7628	6db8800965c51df47e711e72bf22185f_7469	0ed7320c6f511ce95f40560feeb5531a_7752	K_pneumoniae_6_03703
WP_004178982.1		helix-turn-helix domain-containing protein	6	6	1	1	1152				404	404	404	a177eae4552a0a1383f611870b669525_7659	40b06fe84ca1b8758d0c3f8a0dea34af_7129	20e8a30293b7b0c63abbc29d0c4c19ee_1722	6db8800965c51df47e711e72bf22185f_830	0ed7320c6f511ce95f40560feeb5531a_830	K_pneumoniae_6_00615
corC		CNNM family magnesium/cobalt transport protein CorC	6	6	1	1	1085				878	947	889	a177eae4552a0a1383f611870b669525_7525	40b06fe84ca1b8758d0c3f8a0dea34af_6995	20e8a30293b7b0c63abbc29d0c4c19ee_1856	6db8800965c51df47e711e72bf22185f_964	0ed7320c6f511ce95f40560feeb5531a_964	K_pneumoniae_6_00548
bioD		dethiobiotin synthase	6	6	1	1	981				722	722	722	a177eae4552a0a1383f611870b669525_7273	40b06fe84ca1b8758d0c3f8a0dea34af_6743	20e8a30293b7b0c63abbc29d0c4c19ee_2108	6db8800965c51df47e711e72bf22185f_1216	0ed7320c6f511ce95f40560feeb5531a_1216	K_pneumoniae_6_00431
mltF		membrane-bound lytic murein transglycosylase MltF	6	6	1	1	801				1616	1616	1616	a177eae4552a0a1383f611870b669525_2565	40b06fe84ca1b8758d0c3f8a0dea34af_2035	20e8a30293b7b0c63abbc29d0c4c19ee_1310	6db8800965c51df47e711e72bf22185f_2305	0ed7320c6f511ce95f40560feeb5531a_2784	K_pneumoniae_6_01414
galB		4-oxalmesaconate hydratase	6	6	1	1	4887				740	740	740	a177eae4552a0a1383f611870b669525_122	40b06fe84ca1b8758d0c3f8a0dea34af_10011	20e8a30293b7b0c63abbc29d0c4c19ee_7391	6db8800965c51df47e711e72bf22185f_7706	0ed7320c6f511ce95f40560feeb5531a_7515	K_pneumoniae_6_03591
WP_043906767.1		HlyD family secretion protein	6	6	1	1	4088				1085	1085	1085	a177eae4552a0a1383f611870b669525_5956	40b06fe84ca1b8758d0c3f8a0dea34af_4173	20e8a30293b7b0c63abbc29d0c4c19ee_6942	6db8800965c51df47e711e72bf22185f_6958	0ed7320c6f511ce95f40560feeb5531a_7046	K_pneumoniae_6_04075
WP_002916317.1		hemolysin III family protein	6	6	1	1	4602				659	659	659	a177eae4552a0a1383f611870b669525_1614	40b06fe84ca1b8758d0c3f8a0dea34af_998	20e8a30293b7b0c63abbc29d0c4c19ee_9432	6db8800965c51df47e711e72bf22185f_9517	0ed7320c6f511ce95f40560feeb5531a_9815	K_pneumoniae_6_04694
WP_004213172.1		hypothetical protein	6	6	1	1	745				473	473	473	a177eae4552a0a1383f611870b669525_2679	40b06fe84ca1b8758d0c3f8a0dea34af_2153	20e8a30293b7b0c63abbc29d0c4c19ee_1196	6db8800965c51df47e711e72bf22185f_2191	0ed7320c6f511ce95f40560feeb5531a_2670	K_pneumoniae_6_01360
srmB		ATP-dependent RNA helicase SrmB	6	6	1	1	2083				1331	1331	1331	a177eae4552a0a1383f611870b669525_2473	40b06fe84ca1b8758d0c3f8a0dea34af_1857	20e8a30293b7b0c63abbc29d0c4c19ee_9854	6db8800965c51df47e711e72bf22185f_9939	0ed7320c6f511ce95f40560feeb5531a_10237	K_pneumoniae_6_04884
yciH		stress response translation initiation inhibitor YciH	6	6	1	1	3234				326	326	326	a177eae4552a0a1383f611870b669525_6248	40b06fe84ca1b8758d0c3f8a0dea34af_5639	20e8a30293b7b0c63abbc29d0c4c19ee_6608	6db8800965c51df47e711e72bf22185f_6601	0ed7320c6f511ce95f40560feeb5531a_7403	K_pneumoniae_6_03127
nhoA		N-hydroxyarylamine O-acetyltransferase	6	6	1	1	5689				845	845	845	a177eae4552a0a1383f611870b669525_5077	40b06fe84ca1b8758d0c3f8a0dea34af_5054	20e8a30293b7b0c63abbc29d0c4c19ee_2670	6db8800965c51df47e711e72bf22185f_2670	0ed7320c6f511ce95f40560feeb5531a_3256	K_pneumoniae_6_02012
WP_004181580.1		phosphonoacetaldehyde hydrolase	6	6	1	1	4814				809	809	809	a177eae4552a0a1383f611870b669525_92	40b06fe84ca1b8758d0c3f8a0dea34af_10041	20e8a30293b7b0c63abbc29d0c4c19ee_9701	6db8800965c51df47e711e72bf22185f_9786	0ed7320c6f511ce95f40560feeb5531a_10205	K_pneumoniae_6_01488
dacA		D-alanyl-D-alanine carboxypeptidase DacA	6	6	1	1	1104				1199	1271	1211	a177eae4552a0a1383f611870b669525_7563	40b06fe84ca1b8758d0c3f8a0dea34af_7033	20e8a30293b7b0c63abbc29d0c4c19ee_1818	6db8800965c51df47e711e72bf22185f_926	0ed7320c6f511ce95f40560feeb5531a_926	K_pneumoniae_6_00567
group_2340	tal	transaldolase	6	6	1	1	1757				953	953	953	a177eae4552a0a1383f611870b669525_8911	40b06fe84ca1b8758d0c3f8a0dea34af_8381	20e8a30293b7b0c63abbc29d0c4c19ee_4876	6db8800965c51df47e711e72bf22185f_4093	0ed7320c6f511ce95f40560feeb5531a_4572	K_pneumoniae_6_02634
araG		L-arabinose ABC transporter ATP-binding protein AraG	6	6	1	1	2319				1514	1514	1514	a177eae4552a0a1383f611870b669525_3799	40b06fe84ca1b8758d0c3f8a0dea34af_3196	20e8a30293b7b0c63abbc29d0c4c19ee_155	6db8800965c51df47e711e72bf22185f_5889	0ed7320c6f511ce95f40560feeb5531a_1629	K_pneumoniae_6_00862
WP_004181565.1		GNAT family N-acetyltransferase	6	6	1	1	4873				416	416	416	a177eae4552a0a1383f611870b669525_150	40b06fe84ca1b8758d0c3f8a0dea34af_9983	20e8a30293b7b0c63abbc29d0c4c19ee_7419	6db8800965c51df47e711e72bf22185f_7678	0ed7320c6f511ce95f40560feeb5531a_7543	K_pneumoniae_6_03603
argR		transcriptional regulator ArgR	6	6	1	1	5093				470	470	470	a177eae4552a0a1383f611870b669525_993	40b06fe84ca1b8758d0c3f8a0dea34af_372	20e8a30293b7b0c63abbc29d0c4c19ee_6327	6db8800965c51df47e711e72bf22185f_6387	0ed7320c6f511ce95f40560feeb5531a_6790	K_pneumoniae_6_03430
arfB		aminoacyl-tRNA hydrolase	6	6	1	1	1567				413	413	413	a177eae4552a0a1383f611870b669525_8524	40b06fe84ca1b8758d0c3f8a0dea34af_7994	20e8a30293b7b0c63abbc29d0c4c19ee_4489	6db8800965c51df47e711e72bf22185f_4480	0ed7320c6f511ce95f40560feeb5531a_4959	K_pneumoniae_6_02821
prfC		peptide chain release factor 3	6	6	1	1	1792				1589	1589	1589	a177eae4552a0a1383f611870b669525_8982	40b06fe84ca1b8758d0c3f8a0dea34af_8452	20e8a30293b7b0c63abbc29d0c4c19ee_4947	6db8800965c51df47e711e72bf22185f_4022	0ed7320c6f511ce95f40560feeb5531a_4501	K_pneumoniae_6_02601
katE		catalase HPII	6	6	1	1	2185				2258	2258	2258	a177eae4552a0a1383f611870b669525_6351	40b06fe84ca1b8758d0c3f8a0dea34af_5742	20e8a30293b7b0c63abbc29d0c4c19ee_6505	6db8800965c51df47e711e72bf22185f_6704	0ed7320c6f511ce95f40560feeb5531a_7300	K_pneumoniae_6_03176
group_2347	hemB	porphobilinogen synthase	6	6	1	1	1461				974	974	974	a177eae4552a0a1383f611870b669525_8288	40b06fe84ca1b8758d0c3f8a0dea34af_7758	20e8a30293b7b0c63abbc29d0c4c19ee_5738	6db8800965c51df47e711e72bf22185f_201	0ed7320c6f511ce95f40560feeb5531a_201	K_pneumoniae_6_02961
nadB		L-aspartate oxidase	6	6	1	1	2085				1619	1619	1619	a177eae4552a0a1383f611870b669525_2477	40b06fe84ca1b8758d0c3f8a0dea34af_1861	20e8a30293b7b0c63abbc29d0c4c19ee_9858	6db8800965c51df47e711e72bf22185f_9943	0ed7320c6f511ce95f40560feeb5531a_10241	K_pneumoniae_6_04886
WP_004175762.1		CoA transferase subunit A	6	6	1	1	3990				707	707	707	a177eae4552a0a1383f611870b669525_4689	40b06fe84ca1b8758d0c3f8a0dea34af_5443	20e8a30293b7b0c63abbc29d0c4c19ee_10381	6db8800965c51df47e711e72bf22185f_10466	0ed7320c6f511ce95f40560feeb5531a_10524	K_pneumoniae_6_05011
WP_002894469.1		YbeF family transcriptional regulator	6	6	1	1	1107				896	959	917	a177eae4552a0a1383f611870b669525_7569	40b06fe84ca1b8758d0c3f8a0dea34af_7039	20e8a30293b7b0c63abbc29d0c4c19ee_1812	6db8800965c51df47e711e72bf22185f_920	0ed7320c6f511ce95f40560feeb5531a_920	K_pneumoniae_6_00570
pcaD		3-oxoadipate enol-lactonase	6	6	1	1	4147				764	764	764	a177eae4552a0a1383f611870b669525_5838	40b06fe84ca1b8758d0c3f8a0dea34af_4291	20e8a30293b7b0c63abbc29d0c4c19ee_6824	6db8800965c51df47e711e72bf22185f_7076	0ed7320c6f511ce95f40560feeb5531a_6928	K_pneumoniae_6_04132
aceE		pyruvate dehydrogenase (acetyl-transferring), homodimeric type	6	6	1	1	1657				2663	2663	2663	a177eae4552a0a1383f611870b669525_8708	40b06fe84ca1b8758d0c3f8a0dea34af_8178	20e8a30293b7b0c63abbc29d0c4c19ee_4673	6db8800965c51df47e711e72bf22185f_4296	0ed7320c6f511ce95f40560feeb5531a_4775	K_pneumoniae_6_02734
WP_002892192.1		inosine/guanosine kinase	6	6	1	1	1316				1304	1304	1304	a177eae4552a0a1383f611870b669525_7994	40b06fe84ca1b8758d0c3f8a0dea34af_7464	20e8a30293b7b0c63abbc29d0c4c19ee_1387	6db8800965c51df47e711e72bf22185f_495	0ed7320c6f511ce95f40560feeb5531a_495	K_pneumoniae_6_00775
rbsA		ribose ABC transporter ATP-binding protein RbsA	6	6	1	1	2955				1505	1505	1505	a177eae4552a0a1383f611870b669525_10348	40b06fe84ca1b8758d0c3f8a0dea34af_9820	20e8a30293b7b0c63abbc29d0c4c19ee_10591	6db8800965c51df47e711e72bf22185f_10676	0ed7320c6f511ce95f40560feeb5531a_10576	K_pneumoniae_6_05038
pth		aminoacyl-tRNA hydrolase	6	6	1	1	4667				584	584	584	a177eae4552a0a1383f611870b669525_4257	40b06fe84ca1b8758d0c3f8a0dea34af_3652	20e8a30293b7b0c63abbc29d0c4c19ee_10069	6db8800965c51df47e711e72bf22185f_10109	0ed7320c6f511ce95f40560feeb5531a_6416	K_pneumoniae_6_03263
ttcA		tRNA 2-thiocytidine(32) synthetase TtcA	6	6	1	1	4052				935	935	935	a177eae4552a0a1383f611870b669525_6028	40b06fe84ca1b8758d0c3f8a0dea34af_4099	20e8a30293b7b0c63abbc29d0c4c19ee_7014	6db8800965c51df47e711e72bf22185f_6886	0ed7320c6f511ce95f40560feeb5531a_7118	K_pneumoniae_6_04039
WP_002896352.1		GrxA family glutaredoxin	6	6	1	1	899				263	263	263	a177eae4552a0a1383f611870b669525_7108	40b06fe84ca1b8758d0c3f8a0dea34af_6578	20e8a30293b7b0c63abbc29d0c4c19ee_2273	6db8800965c51df47e711e72bf22185f_1381	0ed7320c6f511ce95f40560feeb5531a_1381	K_pneumoniae_6_00350
alsE		D-allulose 6-phosphate 3-epimerase	6	6	1	1	5540				680	680	680	a177eae4552a0a1383f611870b669525_5378	40b06fe84ca1b8758d0c3f8a0dea34af_4753	20e8a30293b7b0c63abbc29d0c4c19ee_2972	6db8800965c51df47e711e72bf22185f_2972	0ed7320c6f511ce95f40560feeb5531a_2954	K_pneumoniae_6_01872
rluD		23S rRNA pseudouridine(1911/1915/1917) synthase RluD	6	6	1	1	2071				980	980	980	a177eae4552a0a1383f611870b669525_2437	40b06fe84ca1b8758d0c3f8a0dea34af_1821	20e8a30293b7b0c63abbc29d0c4c19ee_3120	6db8800965c51df47e711e72bf22185f_3833	0ed7320c6f511ce95f40560feeb5531a_4312	K_pneumoniae_6_02511
WP_002907549.1		VOC family protein	6	6	1	1	5757				1343	1343	1343	a177eae4552a0a1383f611870b669525_4941	40b06fe84ca1b8758d0c3f8a0dea34af_5190	20e8a30293b7b0c63abbc29d0c4c19ee_2534	6db8800965c51df47e711e72bf22185f_2534	0ed7320c6f511ce95f40560feeb5531a_3392	K_pneumoniae_6_02076
WP_023158362.1		sugar ABC transporter ATP-binding protein	6	6	1	1	1129				1502	1550	1510	a177eae4552a0a1383f611870b669525_7613	40b06fe84ca1b8758d0c3f8a0dea34af_7083	20e8a30293b7b0c63abbc29d0c4c19ee_1768	6db8800965c51df47e711e72bf22185f_876	0ed7320c6f511ce95f40560feeb5531a_876	K_pneumoniae_6_00592
leuS		leucine--tRNA ligase	6	6	1	1	1094				2582	2582	2582	a177eae4552a0a1383f611870b669525_7543	40b06fe84ca1b8758d0c3f8a0dea34af_7013	20e8a30293b7b0c63abbc29d0c4c19ee_1838	6db8800965c51df47e711e72bf22185f_946	0ed7320c6f511ce95f40560feeb5531a_946	K_pneumoniae_6_00557
WP_002885511.1		entericidin A/B family lipoprotein	6	6	1	1	55				131	131	131	a177eae4552a0a1383f611870b669525_9557	40b06fe84ca1b8758d0c3f8a0dea34af_9027	20e8a30293b7b0c63abbc29d0c4c19ee_4135	6db8800965c51df47e711e72bf22185f_4834	0ed7320c6f511ce95f40560feeb5531a_5275	K_pneumoniae_6_01661
phnU		2-aminoethylphosphonate ABC transporter permease subunit	6	6	1	1	4819				860	860	860	a177eae4552a0a1383f611870b669525_102	40b06fe84ca1b8758d0c3f8a0dea34af_10031	20e8a30293b7b0c63abbc29d0c4c19ee_9691	6db8800965c51df47e711e72bf22185f_9776	0ed7320c6f511ce95f40560feeb5531a_10215	K_pneumoniae_6_01493
WP_004181630.1		bifunctional metallophosphatase/5'-nucleotidase	6	6	1	1	3025				1556	1556	1556	a177eae4552a0a1383f611870b669525_10192	40b06fe84ca1b8758d0c3f8a0dea34af_9664	20e8a30293b7b0c63abbc29d0c4c19ee_8524	6db8800965c51df47e711e72bf22185f_8595	0ed7320c6f511ce95f40560feeb5531a_8966	K_pneumoniae_6_04423
WP_015056407.1		type I restriction-modification system subunit M	6	6	1	1	3423				1634	1634	1634	a177eae4552a0a1383f611870b669525_552	40b06fe84ca1b8758d0c3f8a0dea34af_10471	20e8a30293b7b0c63abbc29d0c4c19ee_7357	6db8800965c51df47e711e72bf22185f_7166	0ed7320c6f511ce95f40560feeb5531a_10452	K_pneumoniae_6_04974
lptD		LPS assembly protein LptD	6	6	1	1	1725				2348	2348	2348	a177eae4552a0a1383f611870b669525_8845	40b06fe84ca1b8758d0c3f8a0dea34af_8315	20e8a30293b7b0c63abbc29d0c4c19ee_4810	6db8800965c51df47e711e72bf22185f_4159	0ed7320c6f511ce95f40560feeb5531a_4638	K_pneumoniae_6_02666
WP_004179647.1		LysR family transcriptional regulator	6	6	1	1	4091				947	947	947	a177eae4552a0a1383f611870b669525_5950	40b06fe84ca1b8758d0c3f8a0dea34af_4179	20e8a30293b7b0c63abbc29d0c4c19ee_6936	6db8800965c51df47e711e72bf22185f_6964	0ed7320c6f511ce95f40560feeb5531a_7040	K_pneumoniae_6_04078
WP_002916743.1		DUF2623 domain-containing protein	6	6	1	1	3914				287	287	287	a177eae4552a0a1383f611870b669525_1444	40b06fe84ca1b8758d0c3f8a0dea34af_823	20e8a30293b7b0c63abbc29d0c4c19ee_9653	6db8800965c51df47e711e72bf22185f_9657	0ed7320c6f511ce95f40560feeb5531a_9957	K_pneumoniae_6_04797
WP_002902519.1		YnbE family lipoprotein	6	6	1	1	4062				185	185	185	a177eae4552a0a1383f611870b669525_6008	40b06fe84ca1b8758d0c3f8a0dea34af_4119	20e8a30293b7b0c63abbc29d0c4c19ee_6994	6db8800965c51df47e711e72bf22185f_6906	0ed7320c6f511ce95f40560feeb5531a_7098	K_pneumoniae_6_04049
WP_004195815.1		iron ABC transporter permease	6	6	1	1	4266				1574	1574	1574	a177eae4552a0a1383f611870b669525_6847	40b06fe84ca1b8758d0c3f8a0dea34af_6315	20e8a30293b7b0c63abbc29d0c4c19ee_5373	6db8800965c51df47e711e72bf22185f_5397	0ed7320c6f511ce95f40560feeb5531a_5876	K_pneumoniae_6_00219
WP_072157843.1		LacI family DNA-binding transcriptional regulator	6	6	1	1	1139				950	1040	965	a177eae4552a0a1383f611870b669525_7633	40b06fe84ca1b8758d0c3f8a0dea34af_7103	20e8a30293b7b0c63abbc29d0c4c19ee_1748	6db8800965c51df47e711e72bf22185f_856	0ed7320c6f511ce95f40560feeb5531a_856	K_pneumoniae_6_00602
rluA		bifunctional tRNA pseudouridine(32) synthase/23S rRNA pseudouridine(746) synthase RluA	6	6	1	1	1719				659	659	659	a177eae4552a0a1383f611870b669525_8833	40b06fe84ca1b8758d0c3f8a0dea34af_8303	20e8a30293b7b0c63abbc29d0c4c19ee_4798	6db8800965c51df47e711e72bf22185f_4171	0ed7320c6f511ce95f40560feeb5531a_4650	K_pneumoniae_6_02672
dmsA		dimethylsulfoxide reductase subunit A	6	6	1	1	3798				2438	2438	2438	a177eae4552a0a1383f611870b669525_7016	40b06fe84ca1b8758d0c3f8a0dea34af_6486	20e8a30293b7b0c63abbc29d0c4c19ee_10829	6db8800965c51df47e711e72bf22185f_1473	0ed7320c6f511ce95f40560feeb5531a_1473	K_pneumoniae_6_00303
WP_004178894.1		helix-turn-helix transcriptional regulator	6	6	1	1	1224				866	866	866	a177eae4552a0a1383f611870b669525_7803	40b06fe84ca1b8758d0c3f8a0dea34af_7273	20e8a30293b7b0c63abbc29d0c4c19ee_1578	6db8800965c51df47e711e72bf22185f_686	0ed7320c6f511ce95f40560feeb5531a_686	K_pneumoniae_6_00687
WP_002921434.1		sugar kinase	6	6	1	1	3393				929	929	929	a177eae4552a0a1383f611870b669525_484	40b06fe84ca1b8758d0c3f8a0dea34af_10403	20e8a30293b7b0c63abbc29d0c4c19ee_8854	6db8800965c51df47e711e72bf22185f_8925	0ed7320c6f511ce95f40560feeb5531a_9336	K_pneumoniae_6_04574
purU		formyltetrahydrofolate deformylase	6	6	1	1	268				842	842	842	a177eae4552a0a1383f611870b669525_4351	40b06fe84ca1b8758d0c3f8a0dea34af_3743	20e8a30293b7b0c63abbc29d0c4c19ee_7942	6db8800965c51df47e711e72bf22185f_7734	0ed7320c6f511ce95f40560feeb5531a_6325	K_pneumoniae_6_04002
rsmS		pleiotropic regulatory protein RsmS	6	6	1	1	1326				173	173	173	a177eae4552a0a1383f611870b669525_8015	40b06fe84ca1b8758d0c3f8a0dea34af_7485	20e8a30293b7b0c63abbc29d0c4c19ee_1366	6db8800965c51df47e711e72bf22185f_474	0ed7320c6f511ce95f40560feeb5531a_474	K_pneumoniae_6_00785
urtD		urea ABC transporter ATP-binding protein UrtD	6	6	1	1	3739				797	797	797	a177eae4552a0a1383f611870b669525_5670	40b06fe84ca1b8758d0c3f8a0dea34af_4459	20e8a30293b7b0c63abbc29d0c4c19ee_10317	6db8800965c51df47e711e72bf22185f_10402	0ed7320c6f511ce95f40560feeb5531a_8567	K_pneumoniae_6_03797
WP_004178868.1		Gfo/Idh/MocA family oxidoreductase	6	6	1	1	1273				1172	1172	1172	a177eae4552a0a1383f611870b669525_7903	40b06fe84ca1b8758d0c3f8a0dea34af_7373	20e8a30293b7b0c63abbc29d0c4c19ee_1478	6db8800965c51df47e711e72bf22185f_586	0ed7320c6f511ce95f40560feeb5531a_586	K_pneumoniae_6_00735
bamE		outer membrane protein assembly factor BamE	6	6	1	1	2048				341	341	341	a177eae4552a0a1383f611870b669525_2390	40b06fe84ca1b8758d0c3f8a0dea34af_1774	20e8a30293b7b0c63abbc29d0c4c19ee_3167	6db8800965c51df47e711e72bf22185f_3786	0ed7320c6f511ce95f40560feeb5531a_4265	K_pneumoniae_6_02489
nth		endonuclease III	6	6	1	1	5781				635	635	635	a177eae4552a0a1383f611870b669525_4893	40b06fe84ca1b8758d0c3f8a0dea34af_5238	20e8a30293b7b0c63abbc29d0c4c19ee_2486	6db8800965c51df47e711e72bf22185f_2486	0ed7320c6f511ce95f40560feeb5531a_3440	K_pneumoniae_6_02099
nfsB		oxygen-insensitive NAD(P)H nitroreductase	6	6	1	1	1220				650	725	662	a177eae4552a0a1383f611870b669525_7795	40b06fe84ca1b8758d0c3f8a0dea34af_7265	20e8a30293b7b0c63abbc29d0c4c19ee_1586	6db8800965c51df47e711e72bf22185f_694	0ed7320c6f511ce95f40560feeb5531a_694	K_pneumoniae_6_00683
WP_004181595.1		2-dehydro-3-deoxy-6-phosphogalactonate aldolase	6	6	1	1	4779				617	617	617	a177eae4552a0a1383f611870b669525_21	40b06fe84ca1b8758d0c3f8a0dea34af_10112	20e8a30293b7b0c63abbc29d0c4c19ee_9772	6db8800965c51df47e711e72bf22185f_9857	0ed7320c6f511ce95f40560feeb5531a_10134	K_pneumoniae_6_01455
rpsI		30S ribosomal protein S9	6	6	1	1	5077				392	392	392	a177eae4552a0a1383f611870b669525_1025	40b06fe84ca1b8758d0c3f8a0dea34af_404	20e8a30293b7b0c63abbc29d0c4c19ee_6295	6db8800965c51df47e711e72bf22185f_6355	0ed7320c6f511ce95f40560feeb5531a_6758	K_pneumoniae_6_03446
WP_004179729.1		YnfC family lipoprotein	6	6	1	1	3784				710	710	710	a177eae4552a0a1383f611870b669525_5760	40b06fe84ca1b8758d0c3f8a0dea34af_4369	20e8a30293b7b0c63abbc29d0c4c19ee_10227	6db8800965c51df47e711e72bf22185f_10312	0ed7320c6f511ce95f40560feeb5531a_8477	K_pneumoniae_6_03755
glnK		P-II family nitrogen regulator	6	6	1	1	1362				338	338	338	a177eae4552a0a1383f611870b669525_8090	40b06fe84ca1b8758d0c3f8a0dea34af_7560	20e8a30293b7b0c63abbc29d0c4c19ee_5936	6db8800965c51df47e711e72bf22185f_399	0ed7320c6f511ce95f40560feeb5531a_399	K_pneumoniae_6_02863
ptsH		phosphocarrier protein Hpr	6	6	1	1	658				257	257	257	a177eae4552a0a1383f611870b669525_2855	40b06fe84ca1b8758d0c3f8a0dea34af_2329	20e8a30293b7b0c63abbc29d0c4c19ee_1020	6db8800965c51df47e711e72bf22185f_2015	0ed7320c6f511ce95f40560feeb5531a_2494	K_pneumoniae_6_01273
WP_043906862.1		ABC transporter permease	6	6	1	1	1869				971	971	971	a177eae4552a0a1383f611870b669525_9149	40b06fe84ca1b8758d0c3f8a0dea34af_8619	20e8a30293b7b0c63abbc29d0c4c19ee_10973	6db8800965c51df47e711e72bf22185f_3855	0ed7320c6f511ce95f40560feeb5531a_4334	K_pneumoniae_6_02522
WP_043906813.1		LysR substrate-binding domain-containing protein	6	6	1	1	5294				890	890	890	a177eae4552a0a1383f611870b669525_6505	40b06fe84ca1b8758d0c3f8a0dea34af_5976	20e8a30293b7b0c63abbc29d0c4c19ee_8687	6db8800965c51df47e711e72bf22185f_8758	0ed7320c6f511ce95f40560feeb5531a_9218	K_pneumoniae_6_00057
hemW		radical SAM family heme chaperone HemW	6	6	1	1	3871				1139	1139	1139	a177eae4552a0a1383f611870b669525_1515	40b06fe84ca1b8758d0c3f8a0dea34af_899	20e8a30293b7b0c63abbc29d0c4c19ee_9582	6db8800965c51df47e711e72bf22185f_9728	0ed7320c6f511ce95f40560feeb5531a_10028	K_pneumoniae_6_04763
htpG		molecular chaperone HtpG	6	6	1	1	1319				1874	1874	1874	a177eae4552a0a1383f611870b669525_8000	40b06fe84ca1b8758d0c3f8a0dea34af_7470	20e8a30293b7b0c63abbc29d0c4c19ee_1381	6db8800965c51df47e711e72bf22185f_489	0ed7320c6f511ce95f40560feeb5531a_489	K_pneumoniae_6_00778
WP_002916000.1		MFS transporter	6	6	1	1	4529				1241	1241	1241	a177eae4552a0a1383f611870b669525_1758	40b06fe84ca1b8758d0c3f8a0dea34af_1142	20e8a30293b7b0c63abbc29d0c4c19ee_3801	6db8800965c51df47e711e72bf22185f_3154	0ed7320c6f511ce95f40560feeb5531a_3633	K_pneumoniae_6_02184
WP_004198867.1		MFS transporter	6	6	1	1	1231				1205	1241	1211	a177eae4552a0a1383f611870b669525_7817	40b06fe84ca1b8758d0c3f8a0dea34af_7287	20e8a30293b7b0c63abbc29d0c4c19ee_1564	6db8800965c51df47e711e72bf22185f_672	0ed7320c6f511ce95f40560feeb5531a_672	K_pneumoniae_6_00694
truD		tRNA pseudouridine(13) synthase TruD	6	6	1	1	1903				1049	1049	1049	a177eae4552a0a1383f611870b669525_2084	40b06fe84ca1b8758d0c3f8a0dea34af_1468	20e8a30293b7b0c63abbc29d0c4c19ee_3475	6db8800965c51df47e711e72bf22185f_3480	0ed7320c6f511ce95f40560feeb5531a_3959	K_pneumoniae_6_02339
group_2391	gspE	type II secretion system protein GspE	6	6	1	1	1666				1385	1385	1385	a177eae4552a0a1383f611870b669525_8726	40b06fe84ca1b8758d0c3f8a0dea34af_8196	20e8a30293b7b0c63abbc29d0c4c19ee_4691	6db8800965c51df47e711e72bf22185f_4278	0ed7320c6f511ce95f40560feeb5531a_4757	K_pneumoniae_6_02725
deaD		ATP-dependent RNA helicase DeaD	6	6	1	1	5019				1931	1931	1931	a177eae4552a0a1383f611870b669525_1149	40b06fe84ca1b8758d0c3f8a0dea34af_528	20e8a30293b7b0c63abbc29d0c4c19ee_6171	6db8800965c51df47e711e72bf22185f_6231	0ed7320c6f511ce95f40560feeb5531a_6634	K_pneumoniae_6_03505
WP_004179009.1		2-hydroxyacid dehydrogenase	6	6	1	1	1133				1028	1028	1028	a177eae4552a0a1383f611870b669525_7621	40b06fe84ca1b8758d0c3f8a0dea34af_7091	20e8a30293b7b0c63abbc29d0c4c19ee_1760	6db8800965c51df47e711e72bf22185f_868	0ed7320c6f511ce95f40560feeb5531a_868	K_pneumoniae_6_00596
WP_004180363.1		TetR/AcrR family transcriptional regulator	6	6	1	1	334				536	536	536	a177eae4552a0a1383f611870b669525_4485	40b06fe84ca1b8758d0c3f8a0dea34af_3877	20e8a30293b7b0c63abbc29d0c4c19ee_7808	6db8800965c51df47e711e72bf22185f_7868	0ed7320c6f511ce95f40560feeb5531a_6191	K_pneumoniae_6_03940
speD		adenosylmethionine decarboxylase	6	6	1	1	1649				794	794	794	a177eae4552a0a1383f611870b669525_8692	40b06fe84ca1b8758d0c3f8a0dea34af_8162	20e8a30293b7b0c63abbc29d0c4c19ee_4657	6db8800965c51df47e711e72bf22185f_4312	0ed7320c6f511ce95f40560feeb5531a_4791	K_pneumoniae_6_02742
WP_004181556.1		MBL fold metallo-hydrolase	6	6	1	1	4862				779	779	779	a177eae4552a0a1383f611870b669525_172	40b06fe84ca1b8758d0c3f8a0dea34af_9961	20e8a30293b7b0c63abbc29d0c4c19ee_7441	6db8800965c51df47e711e72bf22185f_7656	0ed7320c6f511ce95f40560feeb5531a_7565	K_pneumoniae_6_03614
WP_004175116.1		RbtT/DalT/CsbX family MFS transporter	6	6	1	1	449				1283	1283	1283	a177eae4552a0a1383f611870b669525_3295	40b06fe84ca1b8758d0c3f8a0dea34af_2771	20e8a30293b7b0c63abbc29d0c4c19ee_580	6db8800965c51df47e711e72bf22185f_1575	0ed7320c6f511ce95f40560feeb5531a_2054	K_pneumoniae_6_01061
ycaR		protein YcaR	6	6	1	1	4202				182	182	182	a177eae4552a0a1383f611870b669525_6980	40b06fe84ca1b8758d0c3f8a0dea34af_6450	20e8a30293b7b0c63abbc29d0c4c19ee_5506	6db8800965c51df47e711e72bf22185f_5530	0ed7320c6f511ce95f40560feeb5531a_6009	K_pneumoniae_6_00285
WP_004176522.1		ATP-binding cassette domain-containing protein	6	6	1	1	2207				632	632	632	a177eae4552a0a1383f611870b669525_6397	40b06fe84ca1b8758d0c3f8a0dea34af_5788	20e8a30293b7b0c63abbc29d0c4c19ee_6459	6db8800965c51df47e711e72bf22185f_6750	0ed7320c6f511ce95f40560feeb5531a_7254	K_pneumoniae_6_03198
WP_173016171.1		hydrolase	6	6	1	1	5237				959	1022	982	a177eae4552a0a1383f611870b669525_794	40b06fe84ca1b8758d0c3f8a0dea34af_173	20e8a30293b7b0c63abbc29d0c4c19ee_7116	6db8800965c51df47e711e72bf22185f_7407	0ed7320c6f511ce95f40560feeb5531a_8301	K_pneumoniae_6_04342
WP_004217904.1		iron ABC transporter permease	6	6	1	1	1257				1028	1082	1037	a177eae4552a0a1383f611870b669525_7869	40b06fe84ca1b8758d0c3f8a0dea34af_7339	20e8a30293b7b0c63abbc29d0c4c19ee_1512	6db8800965c51df47e711e72bf22185f_620	0ed7320c6f511ce95f40560feeb5531a_620	K_pneumoniae_6_00718
WP_002917909.1		DedA family protein	6	6	1	1	4982				662	662	662	a177eae4552a0a1383f611870b669525_1222	40b06fe84ca1b8758d0c3f8a0dea34af_601	20e8a30293b7b0c63abbc29d0c4c19ee_6098	6db8800965c51df47e711e72bf22185f_6158	0ed7320c6f511ce95f40560feeb5531a_6561	K_pneumoniae_6_03542
WP_004178398.1		phosphodiesterase	6	6	1	1	5879				824	824	824	a177eae4552a0a1383f611870b669525_9282	40b06fe84ca1b8758d0c3f8a0dea34af_8752	20e8a30293b7b0c63abbc29d0c4c19ee_4410	6db8800965c51df47e711e72bf22185f_4559	0ed7320c6f511ce95f40560feeb5531a_5550	K_pneumoniae_6_01529
queA		tRNA preQ1(34) S-adenosylmethionine ribosyltransferase-isomerase QueA	6	6	1	1	1419				1064	1064	1064	a177eae4552a0a1383f611870b669525_8204	40b06fe84ca1b8758d0c3f8a0dea34af_7674	20e8a30293b7b0c63abbc29d0c4c19ee_5822	6db8800965c51df47e711e72bf22185f_285	0ed7320c6f511ce95f40560feeb5531a_285	K_pneumoniae_6_02920
hypE		hydrogenase expression/formation protein HypE	6	6	1	1	1944				1010	1010	1010	a177eae4552a0a1383f611870b669525_2166	40b06fe84ca1b8758d0c3f8a0dea34af_1550	20e8a30293b7b0c63abbc29d0c4c19ee_3393	6db8800965c51df47e711e72bf22185f_3562	0ed7320c6f511ce95f40560feeb5531a_4041	K_pneumoniae_6_02379
WP_002912648.1		mandelate racemase family protein	6	6	1	1	440				1154	1154	1154	a177eae4552a0a1383f611870b669525_3313	40b06fe84ca1b8758d0c3f8a0dea34af_2789	20e8a30293b7b0c63abbc29d0c4c19ee_562	6db8800965c51df47e711e72bf22185f_1557	0ed7320c6f511ce95f40560feeb5531a_2036	K_pneumoniae_6_01052
WP_004180649.1		cyclic di-GMP phosphodiesterase	6	6	1	1	510				1562	1562	1562	a177eae4552a0a1383f611870b669525_3174	40b06fe84ca1b8758d0c3f8a0dea34af_2648	20e8a30293b7b0c63abbc29d0c4c19ee_701	6db8800965c51df47e711e72bf22185f_1696	0ed7320c6f511ce95f40560feeb5531a_2175	K_pneumoniae_6_01121
WP_002913435.1		putative DNA-binding transcriptional regulator	6	6	1	1	649				392	392	392	a177eae4552a0a1383f611870b669525_2885	40b06fe84ca1b8758d0c3f8a0dea34af_2359	20e8a30293b7b0c63abbc29d0c4c19ee_990	6db8800965c51df47e711e72bf22185f_1985	0ed7320c6f511ce95f40560feeb5531a_2464	K_pneumoniae_6_01260
WP_004146241.1		AzlD domain-containing protein	6	6	1	1	3062				323	323	323	a177eae4552a0a1383f611870b669525_10266	40b06fe84ca1b8758d0c3f8a0dea34af_9738	20e8a30293b7b0c63abbc29d0c4c19ee_8450	6db8800965c51df47e711e72bf22185f_8521	0ed7320c6f511ce95f40560feeb5531a_9040	K_pneumoniae_6_04386
lptA		lipopolysaccharide ABC transporter substrate-binding protein LptA	6	6	1	1	5057				545	545	545	a177eae4552a0a1383f611870b669525_1065	40b06fe84ca1b8758d0c3f8a0dea34af_444	20e8a30293b7b0c63abbc29d0c4c19ee_6255	6db8800965c51df47e711e72bf22185f_6315	0ed7320c6f511ce95f40560feeb5531a_6718	K_pneumoniae_6_03465
WP_004146678.1		plasmid segregation protein ParM	6	6	1	1	92				956	956	956	a177eae4552a0a1383f611870b669525_9632	40b06fe84ca1b8758d0c3f8a0dea34af_9102	20e8a30293b7b0c63abbc29d0c4c19ee_4060	6db8800965c51df47e711e72bf22185f_4909	0ed7320c6f511ce95f40560feeb5531a_5200	K_pneumoniae_6_01696
WP_004151802.1		helix-turn-helix domain-containing protein	6	6	1	1	1261				641	767	662	a177eae4552a0a1383f611870b669525_7877	40b06fe84ca1b8758d0c3f8a0dea34af_7347	20e8a30293b7b0c63abbc29d0c4c19ee_1504	6db8800965c51df47e711e72bf22185f_612	0ed7320c6f511ce95f40560feeb5531a_612	K_pneumoniae_6_00722
WP_002900778.1		NAD(P)/FAD-dependent oxidoreductase	6	6	1	1	4372				1304	1304	1304	a177eae4552a0a1383f611870b669525_6627	40b06fe84ca1b8758d0c3f8a0dea34af_6098	20e8a30293b7b0c63abbc29d0c4c19ee_5156	6db8800965c51df47e711e72bf22185f_5180	0ed7320c6f511ce95f40560feeb5531a_5659	K_pneumoniae_6_00113
WP_002916613.1		YggT family protein	6	6	1	1	3868				566	566	566	a177eae4552a0a1383f611870b669525_1521	40b06fe84ca1b8758d0c3f8a0dea34af_905	20e8a30293b7b0c63abbc29d0c4c19ee_9576	6db8800965c51df47e711e72bf22185f_9734	0ed7320c6f511ce95f40560feeb5531a_10034	K_pneumoniae_6_04760
narL		two-component system response regulator NarL	6	6	1	1	4642				650	650	650	a177eae4552a0a1383f611870b669525_4307	40b06fe84ca1b8758d0c3f8a0dea34af_3702	20e8a30293b7b0c63abbc29d0c4c19ee_10019	6db8800965c51df47e711e72bf22185f_10159	0ed7320c6f511ce95f40560feeb5531a_6366	K_pneumoniae_6_03238
WP_004181166.1		BMC domain-containing protein	6	6	1	1	4477				446	446	446	a177eae4552a0a1383f611870b669525_1864	40b06fe84ca1b8758d0c3f8a0dea34af_1248	20e8a30293b7b0c63abbc29d0c4c19ee_3695	6db8800965c51df47e711e72bf22185f_3260	0ed7320c6f511ce95f40560feeb5531a_3739	K_pneumoniae_6_02235
WP_004181420.1		Zn-dependent oxidoreductase	6	6	1	1	5068				1016	1016	1016	a177eae4552a0a1383f611870b669525_1043	40b06fe84ca1b8758d0c3f8a0dea34af_422	20e8a30293b7b0c63abbc29d0c4c19ee_6277	6db8800965c51df47e711e72bf22185f_6337	0ed7320c6f511ce95f40560feeb5531a_6740	K_pneumoniae_6_03454
WP_002895156.1		AcrZ family multidrug efflux pump-associated protein	6	6	1	1	1013				149	149	149	a177eae4552a0a1383f611870b669525_7337	40b06fe84ca1b8758d0c3f8a0dea34af_6807	20e8a30293b7b0c63abbc29d0c4c19ee_2044	6db8800965c51df47e711e72bf22185f_1152	0ed7320c6f511ce95f40560feeb5531a_1152	K_pneumoniae_6_00463
WP_004178987.1		oxidoreductase	6	6	1	1	1149				1088	1088	1088	a177eae4552a0a1383f611870b669525_7653	40b06fe84ca1b8758d0c3f8a0dea34af_7123	20e8a30293b7b0c63abbc29d0c4c19ee_1728	6db8800965c51df47e711e72bf22185f_836	0ed7320c6f511ce95f40560feeb5531a_836	K_pneumoniae_6_00612
tssA		type VI secretion system protein TssA	6	6	1	1	4020				1598	1598	1598	a177eae4552a0a1383f611870b669525_6094	40b06fe84ca1b8758d0c3f8a0dea34af_4033	20e8a30293b7b0c63abbc29d0c4c19ee_7080	6db8800965c51df47e711e72bf22185f_6820	0ed7320c6f511ce95f40560feeb5531a_7184	K_pneumoniae_6_04007
pduM		microcompartment protein PduM	6	6	1	1	4479				491	491	491	a177eae4552a0a1383f611870b669525_1860	40b06fe84ca1b8758d0c3f8a0dea34af_1244	20e8a30293b7b0c63abbc29d0c4c19ee_3699	6db8800965c51df47e711e72bf22185f_3256	0ed7320c6f511ce95f40560feeb5531a_3735	K_pneumoniae_6_02233
bamA		outer membrane protein assembly factor BamA	6	6	1	1	150				2423	2423	2423	a177eae4552a0a1383f611870b669525_9746	40b06fe84ca1b8758d0c3f8a0dea34af_9216	20e8a30293b7b0c63abbc29d0c4c19ee_3946	6db8800965c51df47e711e72bf22185f_5023	0ed7320c6f511ce95f40560feeb5531a_5086	K_pneumoniae_6_01752
group_242		hypothetical protein	6	6	1	1	1267				609	641	614	a177eae4552a0a1383f611870b669525_7889	40b06fe84ca1b8758d0c3f8a0dea34af_7359	20e8a30293b7b0c63abbc29d0c4c19ee_1492	6db8800965c51df47e711e72bf22185f_600	0ed7320c6f511ce95f40560feeb5531a_600	K_pneumoniae_6_00728
WP_004180143.1		DUF2474 domain-containing protein	6	6	1	1	5740				125	125	125	a177eae4552a0a1383f611870b669525_4975	40b06fe84ca1b8758d0c3f8a0dea34af_5156	20e8a30293b7b0c63abbc29d0c4c19ee_2568	6db8800965c51df47e711e72bf22185f_2568	0ed7320c6f511ce95f40560feeb5531a_3358	K_pneumoniae_6_02060
WP_004178668.1		class I SAM-dependent methyltransferase	6	6	1	1	1553				770	770	770	a177eae4552a0a1383f611870b669525_8478	40b06fe84ca1b8758d0c3f8a0dea34af_7948	20e8a30293b7b0c63abbc29d0c4c19ee_5548	6db8800965c51df47e711e72bf22185f_11	0ed7320c6f511ce95f40560feeb5531a_11	K_pneumoniae_6_03053
mdtD		multidrug transporter subunit MdtD	6	6	1	1	2960				1397	1397	1397	a177eae4552a0a1383f611870b669525_10338	40b06fe84ca1b8758d0c3f8a0dea34af_9810	20e8a30293b7b0c63abbc29d0c4c19ee_10601	6db8800965c51df47e711e72bf22185f_10686	0ed7320c6f511ce95f40560feeb5531a_10566	K_pneumoniae_6_05033
tldD		metalloprotease TldD	6	6	1	1	5101				1445	1445	1445	a177eae4552a0a1383f611870b669525_977	40b06fe84ca1b8758d0c3f8a0dea34af_356	20e8a30293b7b0c63abbc29d0c4c19ee_6343	6db8800965c51df47e711e72bf22185f_6403	0ed7320c6f511ce95f40560feeb5531a_6806	K_pneumoniae_6_03422
WP_004178757.1		membrane protein	6	6	1	1	1353				614	614	614	a177eae4552a0a1383f611870b669525_8069	40b06fe84ca1b8758d0c3f8a0dea34af_7539	20e8a30293b7b0c63abbc29d0c4c19ee_5957	6db8800965c51df47e711e72bf22185f_420	0ed7320c6f511ce95f40560feeb5531a_420	K_pneumoniae_6_02854
WP_004179797.1		MetQ/NlpA family ABC transporter substrate-binding protein	6	6	1	1	2685				806	806	806	a177eae4552a0a1383f611870b669525_5582	40b06fe84ca1b8758d0c3f8a0dea34af_4547	20e8a30293b7b0c63abbc29d0c4c19ee_10163	6db8800965c51df47e711e72bf22185f_10240	0ed7320c6f511ce95f40560feeb5531a_8655	K_pneumoniae_6_03840
fhuB		Fe(3+)-hydroxamate ABC transporter permease FhuB	6	6	1	1	1604				1982	1982	1982	a177eae4552a0a1383f611870b669525_8598	40b06fe84ca1b8758d0c3f8a0dea34af_8068	20e8a30293b7b0c63abbc29d0c4c19ee_4563	6db8800965c51df47e711e72bf22185f_4406	0ed7320c6f511ce95f40560feeb5531a_4885	K_pneumoniae_6_02784
mprA		transcriptional repressor MprA	6	6	1	1	1994				530	530	530	a177eae4552a0a1383f611870b669525_2279	40b06fe84ca1b8758d0c3f8a0dea34af_1663	20e8a30293b7b0c63abbc29d0c4c19ee_3278	6db8800965c51df47e711e72bf22185f_3675	0ed7320c6f511ce95f40560feeb5531a_4154	K_pneumoniae_6_02434
WP_002912867.1		CidB/LrgB family autolysis modulator	6	6	1	1	484				695	695	695	a177eae4552a0a1383f611870b669525_3226	40b06fe84ca1b8758d0c3f8a0dea34af_2700	20e8a30293b7b0c63abbc29d0c4c19ee_649	6db8800965c51df47e711e72bf22185f_1644	0ed7320c6f511ce95f40560feeb5531a_2123	K_pneumoniae_6_01095
pdxY		pyridoxal kinase PdxY	6	6	1	1	5785				860	860	860	a177eae4552a0a1383f611870b669525_4887	40b06fe84ca1b8758d0c3f8a0dea34af_5244	20e8a30293b7b0c63abbc29d0c4c19ee_2480	6db8800965c51df47e711e72bf22185f_2480	0ed7320c6f511ce95f40560feeb5531a_3446	K_pneumoniae_6_02103
tesA		multifunctional acyl-CoA thioesterase I/protease I/lysophospholipase L1	6	6	1	1	1302				623	1181	716	a177eae4552a0a1383f611870b669525_7966	40b06fe84ca1b8758d0c3f8a0dea34af_7436	20e8a30293b7b0c63abbc29d0c4c19ee_1415	6db8800965c51df47e711e72bf22185f_523	0ed7320c6f511ce95f40560feeb5531a_523	K_pneumoniae_6_00761
WP_002912762.1		protein YohO	6	6	1	1	465				113	113	113	a177eae4552a0a1383f611870b669525_3262	40b06fe84ca1b8758d0c3f8a0dea34af_2738	20e8a30293b7b0c63abbc29d0c4c19ee_613	6db8800965c51df47e711e72bf22185f_1608	0ed7320c6f511ce95f40560feeb5531a_2087	K_pneumoniae_6_01077
WP_004181142.1		OmpA family protein	6	6	1	1	4437				1703	1703	1703	a177eae4552a0a1383f611870b669525_1947	40b06fe84ca1b8758d0c3f8a0dea34af_1331	20e8a30293b7b0c63abbc29d0c4c19ee_3612	6db8800965c51df47e711e72bf22185f_3343	0ed7320c6f511ce95f40560feeb5531a_3822	K_pneumoniae_6_02274
WP_004179032.1		filamentous hemagglutinin N-terminal domain-containing protein	6	6	1	1	1092				1793	1793	1793	a177eae4552a0a1383f611870b669525_7539	40b06fe84ca1b8758d0c3f8a0dea34af_7009	20e8a30293b7b0c63abbc29d0c4c19ee_1842	6db8800965c51df47e711e72bf22185f_950	0ed7320c6f511ce95f40560feeb5531a_950	K_pneumoniae_6_00555
tynA		primary-amine oxidase	6	6	1	1	4068				2267	2267	2267	a177eae4552a0a1383f611870b669525_5996	40b06fe84ca1b8758d0c3f8a0dea34af_4131	20e8a30293b7b0c63abbc29d0c4c19ee_6982	6db8800965c51df47e711e72bf22185f_6918	0ed7320c6f511ce95f40560feeb5531a_7086	K_pneumoniae_6_04055
WP_002907812.1		LysE family transporter	6	6	1	1	5827				629	629	629	a177eae4552a0a1383f611870b669525_4792	40b06fe84ca1b8758d0c3f8a0dea34af_5341	20e8a30293b7b0c63abbc29d0c4c19ee_2385	6db8800965c51df47e711e72bf22185f_2385	0ed7320c6f511ce95f40560feeb5531a_3541	K_pneumoniae_6_02148
WP_004180592.1		SDR family oxidoreductase	6	6	1	1	447				749	749	749	a177eae4552a0a1383f611870b669525_3299	40b06fe84ca1b8758d0c3f8a0dea34af_2775	20e8a30293b7b0c63abbc29d0c4c19ee_576	6db8800965c51df47e711e72bf22185f_1571	0ed7320c6f511ce95f40560feeb5531a_2050	K_pneumoniae_6_01059
[truncated: 4,626 more rows]

## Sheet: Column Info
Column	Column Name	Description
[truncated: 14 more rows]
