# Supplementary material for: Comparative De Novo and Pan-Genome Analysis of MDR Nosocomial Bacteria Isolated from Hospitals in Jeddah, Saudi Arabia
Source: MDPI journal article supplement (doi:10.3390/microorganisms11102432), 2023-09-28
Supplement: s1 [file Table S5 S._9 gene_presence_absence.xls]

## Sheet: Gene Presence Absence
Gene	Non-unique Gene name	Annotation	No. isolates	No. sequences	Avg sequences per isolate	Genome Fragment	Order within Fragment	Accessory Fragment	Accessory Order with Fragment	QC	Min group size nuc	Max group size nuc	Avg group size nuc	CP033390.1	CP051482.2	LS483314.1	S_aureus_9
WP_153227840.1		DUF1024 family protein	4	7	1.75	6	1438				211	254	243	e26b52046ef139bf63509f5b590c18e0_2770 e26b52046ef139bf63509f5b590c18e0_3690 e26b52046ef139bf63509f5b590c18e0_3924	935e3caf510be0c503c97acef35381b2_5733 935e3caf510be0c503c97acef35381b2_1162	36ade0437952544bcc39850c777ef069_1750	S_aureus_9_01649
WP_000470336.1		hypothetical protein	4	4	1	6	1434				185	2162	1178	e26b52046ef139bf63509f5b590c18e0_2760	935e3caf510be0c503c97acef35381b2_1242	36ade0437952544bcc39850c777ef069_3058	S_aureus_9_00096
sbnD		staphyloferrin B export MFS transporter	4	4	1	6	2527				1172	1256	1235	e26b52046ef139bf63509f5b590c18e0_129	935e3caf510be0c503c97acef35381b2_3977	36ade0437952544bcc39850c777ef069_151	S_aureus_9_00968
sbnF		3-(L-alanin-3-ylcarbamoyl)-2-[(2-aminoethylcarbamoyl)methyl]-2-hydroxypropanoate synthase SbnF	4	4	1	6	2529				1778	1850	1832	e26b52046ef139bf63509f5b590c18e0_133	935e3caf510be0c503c97acef35381b2_3973	36ade0437952544bcc39850c777ef069_155	S_aureus_9_00966
WP_000736084.1		sugar transferase	4	4	1	6	2536				692	692	692	e26b52046ef139bf63509f5b590c18e0_151	935e3caf510be0c503c97acef35381b2_3955	36ade0437952544bcc39850c777ef069_173	S_aureus_9_00958
WP_000065026.1		bifunctional metallophosphatase/5'-nucleotidase	4	4	1	6	2552				1535	1535	1535	e26b52046ef139bf63509f5b590c18e0_185	935e3caf510be0c503c97acef35381b2_3921	36ade0437952544bcc39850c777ef069_207	S_aureus_9_00942
WP_249741458.1		NAD-dependent formate dehydrogenase	4	4	1	6	2582				1025	1175	1062	e26b52046ef139bf63509f5b590c18e0_237	935e3caf510be0c503c97acef35381b2_3855	36ade0437952544bcc39850c777ef069_269	S_aureus_9_00908
WP_001802886.1		YagU family protein	4	4	1	6	2586				479	494	482	e26b52046ef139bf63509f5b590c18e0_245	935e3caf510be0c503c97acef35381b2_3847	36ade0437952544bcc39850c777ef069_277	S_aureus_9_00904
WP_001796914.1		ABC transporter permease	4	4	1	6	2612				1433	1478	1466	e26b52046ef139bf63509f5b590c18e0_285	935e3caf510be0c503c97acef35381b2_3793	36ade0437952544bcc39850c777ef069_331	S_aureus_9_01119
WP_072419835.1		DUF4909 domain-containing protein	4	4	1	6	1872				455	482	461	e26b52046ef139bf63509f5b590c18e0_3399	935e3caf510be0c503c97acef35381b2_494	36ade0437952544bcc39850c777ef069_3671	S_aureus_9_02451
ggt		gamma-glutamyltransferase	4	4	1	6	2615				2006	2006	2006	e26b52046ef139bf63509f5b590c18e0_291	935e3caf510be0c503c97acef35381b2_3787	36ade0437952544bcc39850c777ef069_337	S_aureus_9_01122
WP_249741536.1		PrsW family intramembrane metalloprotease	4	4	1	6	2642				1142	1229	1163	e26b52046ef139bf63509f5b590c18e0_351	935e3caf510be0c503c97acef35381b2_3731	36ade0437952544bcc39850c777ef069_391	S_aureus_9_01148
WP_000773990.1		hypothetical protein	4	4	1	6	2645				173	173	173	e26b52046ef139bf63509f5b590c18e0_357	935e3caf510be0c503c97acef35381b2_3725	36ade0437952544bcc39850c777ef069_397	S_aureus_9_01151
WP_000638475.1		2-C-methyl-D-erythritol 4-phosphate cytidylyltransferase	4	4	1	6	2657				716	716	716	e26b52046ef139bf63509f5b590c18e0_385	935e3caf510be0c503c97acef35381b2_3697	36ade0437952544bcc39850c777ef069_425	S_aureus_9_01163
tarJ'		alcohol dehydrogenase catalytic domain-containing protein	4	4	1	6	2658				1025	1025	1025	e26b52046ef139bf63509f5b590c18e0_387	935e3caf510be0c503c97acef35381b2_3695	36ade0437952544bcc39850c777ef069_427	S_aureus_9_01164
WP_000066928.1		glucose PTS transporter subunit IIA	4	4	1	6	2671				791	791	791	e26b52046ef139bf63509f5b590c18e0_413	935e3caf510be0c503c97acef35381b2_3669	36ade0437952544bcc39850c777ef069_453	S_aureus_9_01177
WP_064136769.1		linear amide C-N hydrolase	4	4	1	6	2682				992	992	992	e26b52046ef139bf63509f5b590c18e0_437	935e3caf510be0c503c97acef35381b2_3647	36ade0437952544bcc39850c777ef069_473	S_aureus_9_01186
WP_000414202.1		hypothetical protein	4	4	1	6	1877				572	572	572	e26b52046ef139bf63509f5b590c18e0_3409	935e3caf510be0c503c97acef35381b2_484	36ade0437952544bcc39850c777ef069_3681	S_aureus_9_02456
esaB		type VII secretion protein EsaB	4	4	1	6	2266				242	242	242	e26b52046ef139bf63509f5b590c18e0_461	935e3caf510be0c503c97acef35381b2_3627	36ade0437952544bcc39850c777ef069_499	S_aureus_9_01198
WP_000415675.1		DUF4064 domain-containing protein	4	4	1	6	2697				398	398	398	e26b52046ef139bf63509f5b590c18e0_485	935e3caf510be0c503c97acef35381b2_3587	36ade0437952544bcc39850c777ef069_529	S_aureus_9_01605
WP_001822575.1		PTS sugar transporter subunit IIC	4	4	1	6	2704				989	1031	999	e26b52046ef139bf63509f5b590c18e0_499	935e3caf510be0c503c97acef35381b2_3573	36ade0437952544bcc39850c777ef069_543	S_aureus_9_01599
WP_001077730.1		YjiH family protein	4	4	1	6	2713				1313	1361	1325	e26b52046ef139bf63509f5b590c18e0_517	935e3caf510be0c503c97acef35381b2_3555	36ade0437952544bcc39850c777ef069_561	S_aureus_9_01590
WP_000136014.1		alpha/beta hydrolase	4	4	1	6	2715				827	827	827	e26b52046ef139bf63509f5b590c18e0_521	935e3caf510be0c503c97acef35381b2_3551	36ade0437952544bcc39850c777ef069_565	S_aureus_9_01588
WP_000286476.1		NADH-dependent flavin oxidoreductase	4	4	1	6	2717				1199	1199	1199	e26b52046ef139bf63509f5b590c18e0_523	935e3caf510be0c503c97acef35381b2_3549	36ade0437952544bcc39850c777ef069_567	S_aureus_9_01587
WP_001028205.1		VOC family protein	4	4	1	6	2732				926	926	926	e26b52046ef139bf63509f5b590c18e0_555	935e3caf510be0c503c97acef35381b2_3517	36ade0437952544bcc39850c777ef069_599	S_aureus_9_01572
WP_001794540.1		twin-arginine translocase TatA/TatE family subunit	4	4	1	6	2741				215	224	221	e26b52046ef139bf63509f5b590c18e0_573	935e3caf510be0c503c97acef35381b2_3499	36ade0437952544bcc39850c777ef069_617	S_aureus_9_01562
WP_001817700.1		Abi family protein	4	4	1	6	2762				938	974	947	e26b52046ef139bf63509f5b590c18e0_616	935e3caf510be0c503c97acef35381b2_3456	36ade0437952544bcc39850c777ef069_660	S_aureus_9_01541
WP_249741396.1		DUF1270 domain-containing protein	4	4	1	6	918				158	161	160	e26b52046ef139bf63509f5b590c18e0_3944	935e3caf510be0c503c97acef35381b2_5707	36ade0437952544bcc39850c777ef069_1718	S_aureus_9_01662
WP_000849163.1		YxeA family protein	4	4	1	6	2764				368	401	376	e26b52046ef139bf63509f5b590c18e0_622	935e3caf510be0c503c97acef35381b2_3450	36ade0437952544bcc39850c777ef069_666	S_aureus_9_01537
WP_000248843.1		hypothetical protein	4	4	1	6	2793				152	152	152	e26b52046ef139bf63509f5b590c18e0_671	935e3caf510be0c503c97acef35381b2_3391	36ade0437952544bcc39850c777ef069_719	S_aureus_9_01514
WP_001021614.1		DUF1304 domain-containing protein	4	4	1	6	2797				359	359	359	e26b52046ef139bf63509f5b590c18e0_673	935e3caf510be0c503c97acef35381b2_3383	36ade0437952544bcc39850c777ef069_725	S_aureus_9_01513
hprK		HPr(Ser) kinase/phosphatase	4	4	1	6	1131				932	932	932	e26b52046ef139bf63509f5b590c18e0_1452	935e3caf510be0c503c97acef35381b2_2598	36ade0437952544bcc39850c777ef069_1520	S_aureus_9_01299
WP_000876826.1		IDEAL domain-containing protein	4	4	1	6	673				218	218	218	e26b52046ef139bf63509f5b590c18e0_1804	935e3caf510be0c503c97acef35381b2_2213	36ade0437952544bcc39850c777ef069_2056	S_aureus_9_02114
WP_000759232.1		phosphate ABC transporter substrate-binding protein PstS	4	4	1	6	169				983	983	983	e26b52046ef139bf63509f5b590c18e0_2548	935e3caf510be0c503c97acef35381b2_1451	36ade0437952544bcc39850c777ef069_2850	S_aureus_9_01945
yycF		response regulator YycF	4	4	1	6	2405				701	701	701	e26b52046ef139bf63509f5b590c18e0_45	935e3caf510be0c503c97acef35381b2_4175	36ade0437952544bcc39850c777ef069_45	S_aureus_9_01391
WP_001080281.1		C39 family peptidase	4	4	1	6	2985				656	656	656	e26b52046ef139bf63509f5b590c18e0_4841	935e3caf510be0c503c97acef35381b2_4787	36ade0437952544bcc39850c777ef069_5036	S_aureus_9_00403
folD		bifunctional methylenetetrahydrofolate dehydrogenase/methenyltetrahydrofolate cyclohydrolase FolD	4	4	1	6	714				860	860	860	e26b52046ef139bf63509f5b590c18e0_1888	935e3caf510be0c503c97acef35381b2_2129	36ade0437952544bcc39850c777ef069_2136	S_aureus_9_01087
WP_001157329.1		cytochrome c biogenesis protein	4	4	1	6	1744				815	815	815	e26b52046ef139bf63509f5b590c18e0_3134	935e3caf510be0c503c97acef35381b2_752	36ade0437952544bcc39850c777ef069_3414	S_aureus_9_00262
purB		adenylosuccinate lyase	4	4	1	6	1488				1295	1295	1295	e26b52046ef139bf63509f5b590c18e0_3778	935e3caf510be0c503c97acef35381b2_133	36ade0437952544bcc39850c777ef069_4032	S_aureus_9_01961
WP_000894464.1		metal ABC transporter ATP-binding protein	4	4	1	6	2004				743	743	743	e26b52046ef139bf63509f5b590c18e0_1185	935e3caf510be0c503c97acef35381b2_2865	36ade0437952544bcc39850c777ef069_1253	S_aureus_9_02040
WP_000157345.1		DUF951 domain-containing protein	4	4	1	6	2756				203	203	203	e26b52046ef139bf63509f5b590c18e0_604	935e3caf510be0c503c97acef35381b2_3468	36ade0437952544bcc39850c777ef069_648	S_aureus_9_01547
thiW		energy coupling factor transporter S component ThiW	4	4	1	6	275				491	491	491	e26b52046ef139bf63509f5b590c18e0_2362	935e3caf510be0c503c97acef35381b2_1655	36ade0437952544bcc39850c777ef069_2612	S_aureus_9_02344
WP_000897132.1		ATP-dependent Clp protease ATP-binding subunit	4	4	1	6	2125				2456	2456	2456	e26b52046ef139bf63509f5b590c18e0_946	935e3caf510be0c503c97acef35381b2_3102	36ade0437952544bcc39850c777ef069_1018	S_aureus_9_02267
amaP		alkaline shock response membrane anchor protein AmaP	4	4	1	6	842				536	536	536	e26b52046ef139bf63509f5b590c18e0_4338	935e3caf510be0c503c97acef35381b2_5294	36ade0437952544bcc39850c777ef069_4529	S_aureus_9_02315
WP_000781979.1		cyclic-di-AMP receptor	4	4	1	6	2168				329	329	329	e26b52046ef139bf63509f5b590c18e0_822	935e3caf510be0c503c97acef35381b2_3238	36ade0437952544bcc39850c777ef069_882	S_aureus_9_02419
WP_000167314.1		ornithine--oxo-acid transaminase	4	4	1	6	1010				1190	1190	1190	e26b52046ef139bf63509f5b590c18e0_1664	935e3caf510be0c503c97acef35381b2_2354	36ade0437952544bcc39850c777ef069_1910	S_aureus_9_00763
mepR		multidrug efflux transporter transcriptional repressor MepR	4	4	1	6	2728				419	419	419	e26b52046ef139bf63509f5b590c18e0_547	935e3caf510be0c503c97acef35381b2_3525	36ade0437952544bcc39850c777ef069_591	S_aureus_9_01576
rapZ		RNase adapter RapZ	4	4	1	6	1137				911	911	911	e26b52046ef139bf63509f5b590c18e0_1462	935e3caf510be0c503c97acef35381b2_2588	36ade0437952544bcc39850c777ef069_1530	S_aureus_9_01305
WP_000214070.1		truncated hemoglobin YjbI	4	4	1	6	2956				365	365	365	e26b52046ef139bf63509f5b590c18e0_1752	935e3caf510be0c503c97acef35381b2_2266	36ade0437952544bcc39850c777ef069_2004	S_aureus_9_02089
xpt		xanthine phosphoribosyltransferase	4	4	1	6	2782				578	578	578	e26b52046ef139bf63509f5b590c18e0_657	935e3caf510be0c503c97acef35381b2_3415	36ade0437952544bcc39850c777ef069_701	S_aureus_9_01521
femB		glycine glycyltransferase FemB	4	4	1	6	182				1259	1259	1259	e26b52046ef139bf63509f5b590c18e0_2520	935e3caf510be0c503c97acef35381b2_1481	36ade0437952544bcc39850c777ef069_2822	S_aureus_9_01932
WP_000050762.1		PTS sugar transporter subunit IIA	4	4	1	6	2727				443	443	443	e26b52046ef139bf63509f5b590c18e0_543	935e3caf510be0c503c97acef35381b2_3529	36ade0437952544bcc39850c777ef069_587	S_aureus_9_01578
WP_000921246.1		hypothetical protein	4	4	1	6	375				233	233	233	e26b52046ef139bf63509f5b590c18e0_4572	935e3caf510be0c503c97acef35381b2_5058	36ade0437952544bcc39850c777ef069_4769	S_aureus_9_01720
WP_000828722.1		sodium-dependent transporter	4	4	1	6	2194				1337	1337	1337	e26b52046ef139bf63509f5b590c18e0_755	935e3caf510be0c503c97acef35381b2_3305	36ade0437952544bcc39850c777ef069_815	S_aureus_9_02141
WP_000621175.1		type II toxin-antitoxin system PemK/MazF family toxin	4	4	1	6	2922				362	362	362	e26b52046ef139bf63509f5b590c18e0_4073	935e3caf510be0c503c97acef35381b2_5552	36ade0437952544bcc39850c777ef069_4265	S_aureus_9_01414
WP_001129473.1		hypothetical protein	4	4	1	6	2187				269	269	269	e26b52046ef139bf63509f5b590c18e0_769	935e3caf510be0c503c97acef35381b2_3291	36ade0437952544bcc39850c777ef069_829	S_aureus_9_02134
recU		Holliday junction resolvase RecU	4	4	1	6	1353				626	626	626	e26b52046ef139bf63509f5b590c18e0_2673	935e3caf510be0c503c97acef35381b2_1321	36ade0437952544bcc39850c777ef069_2975	S_aureus_9_00057
ytxJ		bacillithiol system redox-active protein YtxJ	4	4	1	6	1108				320	320	320	e26b52046ef139bf63509f5b590c18e0_1407	935e3caf510be0c503c97acef35381b2_2641	36ade0437952544bcc39850c777ef069_1477	S_aureus_9_01280
WP_000784251.1		superantigen-like protein SSL5	4	4	1	6	2811				704	704	704	e26b52046ef139bf63509f5b590c18e0_687	935e3caf510be0c503c97acef35381b2_3369	36ade0437952544bcc39850c777ef069_739	S_aureus_9_02494
WP_000608129.1		DUF72 domain-containing protein	4	4	1	6	1046				848	848	848	e26b52046ef139bf63509f5b590c18e0_1592	935e3caf510be0c503c97acef35381b2_2426	36ade0437952544bcc39850c777ef069_1838	S_aureus_9_00798
udk		uridine kinase	4	4	1	6	1690				623	623	623	e26b52046ef139bf63509f5b590c18e0_3021	935e3caf510be0c503c97acef35381b2_865	36ade0437952544bcc39850c777ef069_3301	S_aureus_9_00213
racE		glutamate racemase	4	4	1	6	606				800	800	800	e26b52046ef139bf63509f5b590c18e0_2065	935e3caf510be0c503c97acef35381b2_1952	36ade0437952544bcc39850c777ef069_2317	S_aureus_9_01003
WP_000648118.1		YtxH domain-containing protein	4	4	1	6	2842				365	365	365	e26b52046ef139bf63509f5b590c18e0_3501	935e3caf510be0c503c97acef35381b2_372	36ade0437952544bcc39850c777ef069_3791	S_aureus_9_02239
WP_000811375.1		ribonuclease J	4	4	1	6	739				1697	1697	1697	e26b52046ef139bf63509f5b590c18e0_1939	935e3caf510be0c503c97acef35381b2_2078	36ade0437952544bcc39850c777ef069_2187	S_aureus_9_01062
WP_000588530.1		NUDIX domain-containing protein	4	4	1	6	2186				395	395	395	e26b52046ef139bf63509f5b590c18e0_771	935e3caf510be0c503c97acef35381b2_3289	36ade0437952544bcc39850c777ef069_831	S_aureus_9_02133
WP_001001019.1		LrgB family protein	4	4	1	6	3176				689	689	689	e26b52046ef139bf63509f5b590c18e0_5063	935e3caf510be0c503c97acef35381b2_4579	36ade0437952544bcc39850c777ef069_5244	S_aureus_9_00502
rplL		50S ribosomal protein L7/L12	4	4	1	6	2109				368	368	368	e26b52046ef139bf63509f5b590c18e0_979	935e3caf510be0c503c97acef35381b2_3069	36ade0437952544bcc39850c777ef069_1051	S_aureus_9_02282
noc		nucleoid occlusion protein	4	4	1	6	2382				839	839	839	e26b52046ef139bf63509f5b590c18e0_5419	935e3caf510be0c503c97acef35381b2_4229	36ade0437952544bcc39850c777ef069_5602	S_aureus_9_01366
smpB		SsrA-binding protein SmpB	4	4	1	6	1169				464	464	464	e26b52046ef139bf63509f5b590c18e0_1494	935e3caf510be0c503c97acef35381b2_2556	36ade0437952544bcc39850c777ef069_1562	S_aureus_9_00873
WP_064136648.1		superantigen-like protein SSL8	4	4	1	6	2817				698	698	698	e26b52046ef139bf63509f5b590c18e0_691	935e3caf510be0c503c97acef35381b2_3363	36ade0437952544bcc39850c777ef069_743	S_aureus_9_02491
WP_000654185.1		TIGR01440 family protein	4	4	1	6	2875				524	524	524	e26b52046ef139bf63509f5b590c18e0_4166	935e3caf510be0c503c97acef35381b2_5459	36ade0437952544bcc39850c777ef069_4358	S_aureus_9_01458
WP_000566649.1		DUF3055 domain-containing protein	4	4	1	6	1041				266	266	266	e26b52046ef139bf63509f5b590c18e0_1602	935e3caf510be0c503c97acef35381b2_2416	36ade0437952544bcc39850c777ef069_1848	S_aureus_9_00793
pmtC		phenol-soluble modulin export ABC transporter ATP-binding protein PmtC	4	4	1	6	1463				872	872	872	e26b52046ef139bf63509f5b590c18e0_3830	935e3caf510be0c503c97acef35381b2_81	36ade0437952544bcc39850c777ef069_4084	S_aureus_9_02551
plsY		glycerol-3-phosphate 1-O-acyltransferase PlsY	4	4	1	6	204				608	608	608	e26b52046ef139bf63509f5b590c18e0_2476	935e3caf510be0c503c97acef35381b2_1525	36ade0437952544bcc39850c777ef069_2778	S_aureus_9_01911
WP_000079317.1		succinate dehydrogenase cytochrome b558 subunit	4	4	1	6	609				614	614	614	e26b52046ef139bf63509f5b590c18e0_2059	935e3caf510be0c503c97acef35381b2_1958	36ade0437952544bcc39850c777ef069_2311	S_aureus_9_01006
WP_000682646.1		tRNA threonylcarbamoyladenosine dehydratase	4	4	1	6	1708				773	773	773	e26b52046ef139bf63509f5b590c18e0_3055	935e3caf510be0c503c97acef35381b2_831	36ade0437952544bcc39850c777ef069_3335	S_aureus_9_00230
sbnI		bifunctional transcriptional regulator/O-phospho-L-serine synthase SbnI	4	4	1	6	2532				764	764	764	e26b52046ef139bf63509f5b590c18e0_139	935e3caf510be0c503c97acef35381b2_3967	36ade0437952544bcc39850c777ef069_161	S_aureus_9_00963
WP_000033477.1		ECF transporter S component	4	4	1	6	728				575	575	575	e26b52046ef139bf63509f5b590c18e0_1916	935e3caf510be0c503c97acef35381b2_2101	36ade0437952544bcc39850c777ef069_2164	S_aureus_9_01073
WP_001165363.1		YerC/YecD family TrpR-related protein	4	4	1	6	1489				302	302	302	e26b52046ef139bf63509f5b590c18e0_3776	935e3caf510be0c503c97acef35381b2_135	36ade0437952544bcc39850c777ef069_4030	S_aureus_9_01962
czrA		Zn(II)-responsive metalloregulatory transcriptional repressor CzrA	4	4	1	6	84				320	320	320	e26b52046ef139bf63509f5b590c18e0_4228	935e3caf510be0c503c97acef35381b2_5397	36ade0437952544bcc39850c777ef069_4420	S_aureus_9_01489
WP_000278015.1		MarR family transcriptional regulator	4	4	1	6	702				419	419	419	e26b52046ef139bf63509f5b590c18e0_1862	935e3caf510be0c503c97acef35381b2_2155	36ade0437952544bcc39850c777ef069_2110	S_aureus_9_01098
WP_000995287.1		BrxA/BrxB family bacilliredoxin	4	4	1	6	129				437	437	437	e26b52046ef139bf63509f5b590c18e0_2630	935e3caf510be0c503c97acef35381b2_1366	36ade0437952544bcc39850c777ef069_2930	S_aureus_9_00038
rplC		50S ribosomal protein L3	4	4	1	6	782				662	662	662	e26b52046ef139bf63509f5b590c18e0_4454	935e3caf510be0c503c97acef35381b2_5176	36ade0437952544bcc39850c777ef069_4649	S_aureus_9_01834
vraF		ABC transporter ATP-binding protein VraF	4	4	1	6	1976				761	761	761	e26b52046ef139bf63509f5b590c18e0_1241	935e3caf510be0c503c97acef35381b2_2809	36ade0437952544bcc39850c777ef069_1309	S_aureus_9_02013
sbnA		2,3-diaminopropionate biosynthesis protein SbnA	4	4	1	6	2524				980	980	980	e26b52046ef139bf63509f5b590c18e0_123	935e3caf510be0c503c97acef35381b2_3983	36ade0437952544bcc39850c777ef069_145	S_aureus_9_00971
WP_000737705.1		CHAP domain-containing protein	4	4	1	6	371				500	500	500	e26b52046ef139bf63509f5b590c18e0_4564	935e3caf510be0c503c97acef35381b2_5066	36ade0437952544bcc39850c777ef069_4761	S_aureus_9_01716
WP_001052491.1		anti-sigma factor antagonist	4	4	1	6	2924				326	326	326	e26b52046ef139bf63509f5b590c18e0_4069	935e3caf510be0c503c97acef35381b2_5556	36ade0437952544bcc39850c777ef069_4261	S_aureus_9_02521
WP_000498572.1		threonine/serine exporter family protein	4	4	1	6	2065				452	452	452	e26b52046ef139bf63509f5b590c18e0_1067	935e3caf510be0c503c97acef35381b2_2981	36ade0437952544bcc39850c777ef069_1139	S_aureus_9_02188
gndA		NADP-dependent phosphogluconate dehydrogenase	4	4	1	6	1591				1406	1406	1406	e26b52046ef139bf63509f5b590c18e0_2824	935e3caf510be0c503c97acef35381b2_1066	36ade0437952544bcc39850c777ef069_3104	S_aureus_9_00117
argS		arginine--tRNA ligase	4	4	1	6	2028				1661	1661	1661	e26b52046ef139bf63509f5b590c18e0_1137	935e3caf510be0c503c97acef35381b2_2913	36ade0437952544bcc39850c777ef069_1205	S_aureus_9_02064
WP_064136642.1		methionine ABC transporter ATP-binding protein	4	4	1	6	2191				1025	1025	1025	e26b52046ef139bf63509f5b590c18e0_761	935e3caf510be0c503c97acef35381b2_3299	36ade0437952544bcc39850c777ef069_821	S_aureus_9_02138
mnhC1		Na+/H+ antiporter Mnh1 subunit C	4	4	1	6	1017				341	341	341	e26b52046ef139bf63509f5b590c18e0_1650	935e3caf510be0c503c97acef35381b2_2368	36ade0437952544bcc39850c777ef069_1896	S_aureus_9_00770
WP_000846746.1		YwpF-like family protein	4	4	1	6	2893				440	440	440	e26b52046ef139bf63509f5b590c18e0_4132	935e3caf510be0c503c97acef35381b2_5493	36ade0437952544bcc39850c777ef069_4324	S_aureus_9_01442
WP_000435068.1		hypothetical protein	4	4	1	6	242				197	197	197	e26b52046ef139bf63509f5b590c18e0_2400	935e3caf510be0c503c97acef35381b2_1601	36ade0437952544bcc39850c777ef069_2702	S_aureus_9_02374
hssR		DNA-binding heme response regulator HssR	4	4	1	6	439				674	674	674	e26b52046ef139bf63509f5b590c18e0_4687	935e3caf510be0c503c97acef35381b2_4947	36ade0437952544bcc39850c777ef069_4880	S_aureus_9_01772
WP_001236734.1		DUF4930 family protein	4	4	1	6	1732				473	473	473	e26b52046ef139bf63509f5b590c18e0_3105	935e3caf510be0c503c97acef35381b2_781	36ade0437952544bcc39850c777ef069_3385	S_aureus_9_00251
WP_000584499.1		type II toxin-antitoxin system Phd/YefM family antitoxin	4	4	1	6	55				251	251	251	e26b52046ef139bf63509f5b590c18e0_4777	935e3caf510be0c503c97acef35381b2_4851	36ade0437952544bcc39850c777ef069_4970	S_aureus_9_00375
WP_000394698.1		hypothetical protein	4	4	1	6	2780				662	662	662	e26b52046ef139bf63509f5b590c18e0_652	935e3caf510be0c503c97acef35381b2_3420	36ade0437952544bcc39850c777ef069_696	S_aureus_9_01523
WP_001131841.1		fructose-bisphosphate aldolase	4	4	1	6	64				860	860	860	e26b52046ef139bf63509f5b590c18e0_4188	935e3caf510be0c503c97acef35381b2_5437	36ade0437952544bcc39850c777ef069_4380	S_aureus_9_01469
WP_000052590.1		ribonuclease J	4	4	1	6	294				1673	1673	1673	e26b52046ef139bf63509f5b590c18e0_2324	935e3caf510be0c503c97acef35381b2_1693	36ade0437952544bcc39850c777ef069_2574	S_aureus_9_00625
WP_000426914.1		acyl carrier protein	4	4	1	6	501				233	233	233	e26b52046ef139bf63509f5b590c18e0_2234	935e3caf510be0c503c97acef35381b2_1783	36ade0437952544bcc39850c777ef069_2486	S_aureus_9_00666
WP_000812832.1		aminotransferase class V-fold PLP-dependent enzyme	4	4	1	6	2171				1337	1337	1337	e26b52046ef139bf63509f5b590c18e0_818	935e3caf510be0c503c97acef35381b2_3242	36ade0437952544bcc39850c777ef069_878	S_aureus_9_02421
lysA		diaminopimelate decarboxylase	4	4	1	6	158				1265	1265	1265	e26b52046ef139bf63509f5b590c18e0_2570	935e3caf510be0c503c97acef35381b2_1428	36ade0437952544bcc39850c777ef069_2872	S_aureus_9_00010
crcB		fluoride efflux transporter CrcB	4	4	1	6	1861				365	365	365	e26b52046ef139bf63509f5b590c18e0_3374	935e3caf510be0c503c97acef35381b2_517	36ade0437952544bcc39850c777ef069_3648	S_aureus_9_02440
mreD		rod shape-determining protein MreD	4	4	1	6	1728				530	530	530	e26b52046ef139bf63509f5b590c18e0_3099	935e3caf510be0c503c97acef35381b2_787	36ade0437952544bcc39850c777ef069_3379	S_aureus_9_00249
WP_000026308.1		hypothetical protein	4	4	1	6	282				215	215	215	e26b52046ef139bf63509f5b590c18e0_2348	935e3caf510be0c503c97acef35381b2_1669	36ade0437952544bcc39850c777ef069_2598	S_aureus_9_02337
WP_000113262.1		Txe/YoeB family addiction module toxin	4	4	1	6	54				266	266	266	e26b52046ef139bf63509f5b590c18e0_4775	935e3caf510be0c503c97acef35381b2_4853	36ade0437952544bcc39850c777ef069_4968	S_aureus_9_00374
msaA		regulatory protein MsaA	4	4	1	6	155				308	308	308	e26b52046ef139bf63509f5b590c18e0_2576	935e3caf510be0c503c97acef35381b2_1422	36ade0437952544bcc39850c777ef069_2878	S_aureus_9_00013
WP_000036005.1		DUF2529 domain-containing protein	4	4	1	6	65				521	521	521	e26b52046ef139bf63509f5b590c18e0_4190	935e3caf510be0c503c97acef35381b2_5435	36ade0437952544bcc39850c777ef069_4382	S_aureus_9_01470
WP_000581077.1		sulfurtransferase TusA family protein	4	4	1	6	575				224	224	224	e26b52046ef139bf63509f5b590c18e0_4006	935e3caf510be0c503c97acef35381b2_5619	36ade0437952544bcc39850c777ef069_4192	S_aureus_9_01697
nreA		nitrate respiration regulation accessory nitrate sensor NreA	4	4	1	6	38				452	452	452	e26b52046ef139bf63509f5b590c18e0_4745	935e3caf510be0c503c97acef35381b2_4883	36ade0437952544bcc39850c777ef069_4938	S_aureus_9_00360
WP_000810620.1		DUF5325 family protein	4	4	1	6	648				191	191	191	e26b52046ef139bf63509f5b590c18e0_1979	935e3caf510be0c503c97acef35381b2_2038	36ade0437952544bcc39850c777ef069_2231	S_aureus_9_01043
rnmV		ribonuclease M5	4	4	1	6	2159				536	536	536	e26b52046ef139bf63509f5b590c18e0_840	935e3caf510be0c503c97acef35381b2_3220	36ade0437952544bcc39850c777ef069_900	S_aureus_9_02410
WP_000801007.1		YozE family protein	4	4	1	6	136				221	221	221	e26b52046ef139bf63509f5b590c18e0_2616	935e3caf510be0c503c97acef35381b2_1380	36ade0437952544bcc39850c777ef069_2916	S_aureus_9_00031
WP_000011687.1		sterile alpha motif-like domain-containing protein	4	4	1	6	3173				218	218	218	e26b52046ef139bf63509f5b590c18e0_5069	935e3caf510be0c503c97acef35381b2_4573	36ade0437952544bcc39850c777ef069_5250	S_aureus_9_00505
WP_000161366.1		D-lactate dehydrogenase	4	4	1	6	3155				998	998	998	e26b52046ef139bf63509f5b590c18e0_5105	935e3caf510be0c503c97acef35381b2_4539	36ade0437952544bcc39850c777ef069_5284	S_aureus_9_00522
WP_000257888.1		DNA-dependent RNA polymerase auxiliary subunit epsilon family protein	4	4	1	6	740				218	218	218	e26b52046ef139bf63509f5b590c18e0_1941	935e3caf510be0c503c97acef35381b2_2076	36ade0437952544bcc39850c777ef069_2189	S_aureus_9_01061
WP_000381849.1		cytochrome ubiquinol oxidase subunit I	4	4	1	6	736				1361	1361	1361	e26b52046ef139bf63509f5b590c18e0_1933	935e3caf510be0c503c97acef35381b2_2084	36ade0437952544bcc39850c777ef069_2181	S_aureus_9_01065
WP_000836465.1		rhodanese-like domain-containing protein	4	4	1	6	1835				311	311	311	e26b52046ef139bf63509f5b590c18e0_3321	935e3caf510be0c503c97acef35381b2_566	36ade0437952544bcc39850c777ef069_3601	S_aureus_9_00345
rplB		50S ribosomal protein L2	4	4	1	6	785				833	833	833	e26b52046ef139bf63509f5b590c18e0_4448	935e3caf510be0c503c97acef35381b2_5182	36ade0437952544bcc39850c777ef069_4643	S_aureus_9_01831
WP_000538141.1		HD domain-containing protein	4	4	1	6	1127				650	650	650	e26b52046ef139bf63509f5b590c18e0_1442	935e3caf510be0c503c97acef35381b2_2606	36ade0437952544bcc39850c777ef069_1512	S_aureus_9_01295
WP_000450257.1		hemolysin family protein	4	4	1	6	1934				1349	1349	1349	e26b52046ef139bf63509f5b590c18e0_1325	935e3caf510be0c503c97acef35381b2_2725	36ade0437952544bcc39850c777ef069_1393	S_aureus_9_01242
rny		ribonuclease Y	4	4	1	6	283				1559	1559	1559	e26b52046ef139bf63509f5b590c18e0_2346	935e3caf510be0c503c97acef35381b2_1671	36ade0437952544bcc39850c777ef069_2596	S_aureus_9_02336
rsmA		16S rRNA (adenine(1518)-N(6)/adenine(1519)-N(6))-dimethyltransferase RsmA	4	4	1	6	2158				893	911	897	e26b52046ef139bf63509f5b590c18e0_842	935e3caf510be0c503c97acef35381b2_3218	36ade0437952544bcc39850c777ef069_902	S_aureus_9_02409
sarV		HTH-type transcriptional regulator SarV	4	4	1	6	764				350	350	350	e26b52046ef139bf63509f5b590c18e0_4490	935e3caf510be0c503c97acef35381b2_5140	36ade0437952544bcc39850c777ef069_4687	S_aureus_9_01850
WP_000198504.1		hypothetical protein	4	4	1	6	1981				428	428	428	e26b52046ef139bf63509f5b590c18e0_1231	935e3caf510be0c503c97acef35381b2_2819	36ade0437952544bcc39850c777ef069_1299	S_aureus_9_02018
WP_001215907.1		acylphosphatase	4	4	1	6	154				269	269	269	e26b52046ef139bf63509f5b590c18e0_2578	935e3caf510be0c503c97acef35381b2_1420	36ade0437952544bcc39850c777ef069_2880	S_aureus_9_00014
dnaB		replicative DNA helicase	4	4	1	6	2403				1400	1400	1400	e26b52046ef139bf63509f5b590c18e0_35	935e3caf510be0c503c97acef35381b2_4185	36ade0437952544bcc39850c777ef069_35	S_aureus_9_01387
WP_000356963.1		hypothetical protein	4	4	1	6	2576				203	203	203	e26b52046ef139bf63509f5b590c18e0_223	935e3caf510be0c503c97acef35381b2_3869	36ade0437952544bcc39850c777ef069_255	S_aureus_9_00916
pyrR		bifunctional pyr operon transcriptional regulator/uracil phosphoribosyltransferase PyrR	4	4	1	6	467				527	527	527	e26b52046ef139bf63509f5b590c18e0_2166	935e3caf510be0c503c97acef35381b2_1851	36ade0437952544bcc39850c777ef069_2418	S_aureus_9_00700
WP_000863556.1		superoxide dismutase	4	4	1	6	1634				599	599	599	e26b52046ef139bf63509f5b590c18e0_2911	935e3caf510be0c503c97acef35381b2_979	36ade0437952544bcc39850c777ef069_3191	S_aureus_9_00158
WP_000695342.1		YbhB/YbcL family Raf kinase inhibitor-like protein	4	4	1	6	988				515	515	515	e26b52046ef139bf63509f5b590c18e0_1708	935e3caf510be0c503c97acef35381b2_2310	36ade0437952544bcc39850c777ef069_1956	S_aureus_9_00741
WP_000503820.1		molybdenum cofactor biosynthesis protein MoaB	4	4	1	6	755				506	506	506	e26b52046ef139bf63509f5b590c18e0_4508	935e3caf510be0c503c97acef35381b2_5122	36ade0437952544bcc39850c777ef069_4705	S_aureus_9_01858
galU		UTP--glucose-1-phosphate uridylyltransferase GalU	4	4	1	6	3224				866	866	866	e26b52046ef139bf63509f5b590c18e0_4975	935e3caf510be0c503c97acef35381b2_4663	36ade0437952544bcc39850c777ef069_5154	S_aureus_9_00460
rplO		50S ribosomal protein L15	4	4	1	6	801				440	440	440	e26b52046ef139bf63509f5b590c18e0_4416	935e3caf510be0c503c97acef35381b2_5214	36ade0437952544bcc39850c777ef069_4611	S_aureus_9_01815
pth		aminoacyl-tRNA hydrolase	4	4	1	6	2149				572	572	572	e26b52046ef139bf63509f5b590c18e0_862	935e3caf510be0c503c97acef35381b2_3198	36ade0437952544bcc39850c777ef069_922	S_aureus_9_02400
WP_000398672.1		beta-class phenol-soluble modulin	4	4	1	6	443				134	134	134	e26b52046ef139bf63509f5b590c18e0_2116	935e3caf510be0c503c97acef35381b2_1901	36ade0437952544bcc39850c777ef069_2368	S_aureus_9_00724
WP_000171859.1		hypothetical protein	4	4	1	6	1733				284	284	284	e26b52046ef139bf63509f5b590c18e0_3109	935e3caf510be0c503c97acef35381b2_777	36ade0437952544bcc39850c777ef069_3389	S_aureus_9_00252
WP_000230358.1		hypothetical protein	4	4	1	6	2655				146	146	146	e26b52046ef139bf63509f5b590c18e0_381	935e3caf510be0c503c97acef35381b2_3701	36ade0437952544bcc39850c777ef069_421	S_aureus_9_01161
WP_000704122.1		Rrf2 family transcriptional regulator	4	4	1	6	1705				422	422	422	e26b52046ef139bf63509f5b590c18e0_3051	935e3caf510be0c503c97acef35381b2_835	36ade0437952544bcc39850c777ef069_3331	S_aureus_9_00228
tsf		translation elongation factor Ts	4	4	1	6	312				881	881	881	e26b52046ef139bf63509f5b590c18e0_2288	935e3caf510be0c503c97acef35381b2_1729	36ade0437952544bcc39850c777ef069_2538	S_aureus_9_00643
WP_000841351.1		thermonuclease family protein	4	4	1	6	235				533	533	533	e26b52046ef139bf63509f5b590c18e0_2414	935e3caf510be0c503c97acef35381b2_1587	36ade0437952544bcc39850c777ef069_2716	S_aureus_9_02549
dltA		D-alanine--poly(phosphoribitol) ligase subunit DltA	4	4	1	6	1035				1457	1457	1457	e26b52046ef139bf63509f5b590c18e0_1614	935e3caf510be0c503c97acef35381b2_2404	36ade0437952544bcc39850c777ef069_1860	S_aureus_9_00788
WP_000273356.1		thymidine kinase	4	4	1	6	2870				599	599	599	e26b52046ef139bf63509f5b590c18e0_4176	935e3caf510be0c503c97acef35381b2_5449	36ade0437952544bcc39850c777ef069_4368	S_aureus_9_01463
cysE		serine O-acetyltransferase	4	4	1	6	2121				647	680	655	e26b52046ef139bf63509f5b590c18e0_954	935e3caf510be0c503c97acef35381b2_3094	36ade0437952544bcc39850c777ef069_1026	S_aureus_9_02271
WP_000171798.1		hypothetical protein	4	4	1	6	175				344	344	344	e26b52046ef139bf63509f5b590c18e0_2536	935e3caf510be0c503c97acef35381b2_1463	36ade0437952544bcc39850c777ef069_2838	S_aureus_9_01939
WP_000171418.1		Asp23/Gls24 family envelope stress response protein	4	4	1	6	494				374	374	374	e26b52046ef139bf63509f5b590c18e0_2220	935e3caf510be0c503c97acef35381b2_1797	36ade0437952544bcc39850c777ef069_2472	S_aureus_9_00673
WP_000228666.1		low molecular weight phosphotyrosine protein phosphatase	4	4	1	6	1517				464	464	464	e26b52046ef139bf63509f5b590c18e0_3718	935e3caf510be0c503c97acef35381b2_193	36ade0437952544bcc39850c777ef069_3972	S_aureus_9_01988
WP_000375864.1		helix-turn-helix transcriptional regulator	4	4	1	6	2852				464	464	464	e26b52046ef139bf63509f5b590c18e0_3519	935e3caf510be0c503c97acef35381b2_354	36ade0437952544bcc39850c777ef069_3809	S_aureus_9_02247
mnhF1		Na+/H+ antiporter Mnh1 subunit F	4	4	1	6	1020				293	293	293	e26b52046ef139bf63509f5b590c18e0_1644	935e3caf510be0c503c97acef35381b2_2374	36ade0437952544bcc39850c777ef069_1890	S_aureus_9_00773
WP_000159960.1		CTP synthase	4	4	1	6	66				1610	1610	1610	e26b52046ef139bf63509f5b590c18e0_4192	935e3caf510be0c503c97acef35381b2_5433	36ade0437952544bcc39850c777ef069_4384	S_aureus_9_01471
WP_000681968.1		hypothetical protein	4	4	1	6	1459				176	176	176	e26b52046ef139bf63509f5b590c18e0_3838	935e3caf510be0c503c97acef35381b2_73	36ade0437952544bcc39850c777ef069_4092	S_aureus_9_02531
arcA		arginine deiminase	4	4	1	6	3074				1235	1235	1235	e26b52046ef139bf63509f5b590c18e0_5269	935e3caf510be0c503c97acef35381b2_4371	36ade0437952544bcc39850c777ef069_5452	S_aureus_9_00597
ftsL		cell division protein FtsL	4	4	1	6	450				401	401	401	e26b52046ef139bf63509f5b590c18e0_2130	935e3caf510be0c503c97acef35381b2_1887	36ade0437952544bcc39850c777ef069_2382	S_aureus_9_00717
lipA		lipoyl synthase	4	4	1	6	1043				917	917	917	e26b52046ef139bf63509f5b590c18e0_1598	935e3caf510be0c503c97acef35381b2_2420	36ade0437952544bcc39850c777ef069_1844	S_aureus_9_00795
WP_000872877.1		RNA polymerase sigma factor	4	4	1	6	2116				569	569	569	e26b52046ef139bf63509f5b590c18e0_964	935e3caf510be0c503c97acef35381b2_3084	36ade0437952544bcc39850c777ef069_1036	S_aureus_9_02276
ruvX		Holliday junction resolvase RuvX	4	4	1	6	1695				428	428	428	e26b52046ef139bf63509f5b590c18e0_3031	935e3caf510be0c503c97acef35381b2_855	36ade0437952544bcc39850c777ef069_3311	S_aureus_9_00218
WP_000600387.1		YjcG family protein	4	4	1	6	2944				509	509	509	e26b52046ef139bf63509f5b590c18e0_1776	935e3caf510be0c503c97acef35381b2_2242	36ade0437952544bcc39850c777ef069_2028	S_aureus_9_02101
WP_000004981.1		HIT family protein	4	4	1	6	2841				422	422	422	e26b52046ef139bf63509f5b590c18e0_3499	935e3caf510be0c503c97acef35381b2_374	36ade0437952544bcc39850c777ef069_3789	S_aureus_9_02238
WP_000748760.1		arginine repressor	4	4	1	6	3073				449	449	449	e26b52046ef139bf63509f5b590c18e0_5273	935e3caf510be0c503c97acef35381b2_4367	36ade0437952544bcc39850c777ef069_5456	S_aureus_9_00598
WP_000354088.1		threonine/serine exporter ThrE family protein	4	4	1	6	2064				764	764	764	e26b52046ef139bf63509f5b590c18e0_1069	935e3caf510be0c503c97acef35381b2_2979	36ade0437952544bcc39850c777ef069_1141	S_aureus_9_02189
WP_000383814.1		DUF948 domain-containing protein	4	4	1	6	1817				491	491	491	e26b52046ef139bf63509f5b590c18e0_3285	935e3caf510be0c503c97acef35381b2_602	36ade0437952544bcc39850c777ef069_3565	S_aureus_9_00327
atpB		F0F1 ATP synthase subunit A	4	4	1	6	2880				728	728	728	e26b52046ef139bf63509f5b590c18e0_4156	935e3caf510be0c503c97acef35381b2_5469	36ade0437952544bcc39850c777ef069_4348	S_aureus_9_01453
sdhA		succinate dehydrogenase flavoprotein subunit	4	4	1	6	608				1766	1766	1766	e26b52046ef139bf63509f5b590c18e0_2061	935e3caf510be0c503c97acef35381b2_1956	36ade0437952544bcc39850c777ef069_2313	S_aureus_9_01005
cspA		cold shock protein CspA	4	4	1	6	156				200	200	200	e26b52046ef139bf63509f5b590c18e0_2574	935e3caf510be0c503c97acef35381b2_1424	36ade0437952544bcc39850c777ef069_2876	S_aureus_9_00012
icaR		ica operon transcriptional regulator IcaR	4	4	1	6	2337				560	560	560	e26b52046ef139bf63509f5b590c18e0_5331	935e3caf510be0c503c97acef35381b2_4309	36ade0437952544bcc39850c777ef069_5514	S_aureus_9_01321
WP_000671099.1		hypothetical protein	4	4	1	6	2072				269	269	269	e26b52046ef139bf63509f5b590c18e0_1053	935e3caf510be0c503c97acef35381b2_2995	36ade0437952544bcc39850c777ef069_1125	S_aureus_9_02181
WP_000034961.1		extracellular solute-binding protein	4	4	1	6	2620				1271	1271	1271	e26b52046ef139bf63509f5b590c18e0_301	935e3caf510be0c503c97acef35381b2_3777	36ade0437952544bcc39850c777ef069_347	S_aureus_9_01127
WP_000140050.1		ABC transporter ATP-binding protein	4	4	1	6	980				1082	1082	1082	e26b52046ef139bf63509f5b590c18e0_1724	935e3caf510be0c503c97acef35381b2_2294	36ade0437952544bcc39850c777ef069_1972	S_aureus_9_02075
rpoZ		DNA-directed RNA polymerase subunit omega	4	4	1	6	479				218	218	218	e26b52046ef139bf63509f5b590c18e0_2190	935e3caf510be0c503c97acef35381b2_1827	36ade0437952544bcc39850c777ef069_2442	S_aureus_9_00688
sdpB		CPBP family intramembrane metalloprotease SdpB	4	4	1	6	382				737	737	737	e26b52046ef139bf63509f5b590c18e0_4586	935e3caf510be0c503c97acef35381b2_5044	36ade0437952544bcc39850c777ef069_4783	S_aureus_9_01726
WP_000785252.1		hypothetical protein	4	4	1	6	1149				458	458	458	e26b52046ef139bf63509f5b590c18e0_1486	935e3caf510be0c503c97acef35381b2_2564	36ade0437952544bcc39850c777ef069_1554	S_aureus_9_00877
WP_000677261.1		NAD(P)H-dependent oxidoreductase	4	4	1	6	2089				566	566	566	e26b52046ef139bf63509f5b590c18e0_1019	935e3caf510be0c503c97acef35381b2_3029	36ade0437952544bcc39850c777ef069_1091	S_aureus_9_02499
WP_001065801.1		thioredoxin family protein	4	4	1	6	1201				296	296	296	e26b52046ef139bf63509f5b590c18e0_1559	935e3caf510be0c503c97acef35381b2_2457	36ade0437952544bcc39850c777ef069_1675	S_aureus_9_00842
rpsL		30S ribosomal protein S12	4	4	1	6	2104				413	413	413	e26b52046ef139bf63509f5b590c18e0_989	935e3caf510be0c503c97acef35381b2_3059	36ade0437952544bcc39850c777ef069_1061	S_aureus_9_02287
WP_000633692.1		ribosomal-processing cysteine protease Prp	4	4	1	6	1726				320	320	320	e26b52046ef139bf63509f5b590c18e0_3094	935e3caf510be0c503c97acef35381b2_792	36ade0437952544bcc39850c777ef069_3374	S_aureus_9_00247
vraX		C1q-binding complement inhibitor VraX	4	4	1	6	2071				167	167	167	e26b52046ef139bf63509f5b590c18e0_1055	935e3caf510be0c503c97acef35381b2_2993	36ade0437952544bcc39850c777ef069_1127	S_aureus_9_02182
WP_001047239.1		Rrf2 family transcriptional regulator	4	4	1	6	2055				440	440	440	e26b52046ef139bf63509f5b590c18e0_1087	935e3caf510be0c503c97acef35381b2_2961	36ade0437952544bcc39850c777ef069_1159	S_aureus_9_02198
mnhB2		Na+/H+ antiporter Mnh2 subunit B	4	4	1	6	2013				425	425	425	e26b52046ef139bf63509f5b590c18e0_1167	935e3caf510be0c503c97acef35381b2_2883	36ade0437952544bcc39850c777ef069_1235	S_aureus_9_02049
WP_000927632.1		sulfite exporter TauE/SafE family protein	4	4	1	6	1045				827	827	827	e26b52046ef139bf63509f5b590c18e0_1594	935e3caf510be0c503c97acef35381b2_2424	36ade0437952544bcc39850c777ef069_1840	S_aureus_9_00797
pflA		pyruvate formate lyase-activating protein	4	4	1	6	2632				755	755	755	e26b52046ef139bf63509f5b590c18e0_325	935e3caf510be0c503c97acef35381b2_3753	36ade0437952544bcc39850c777ef069_371	S_aureus_9_01139
infA		translation initiation factor IF-1	4	4	1	6	804				218	218	218	e26b52046ef139bf63509f5b590c18e0_4410	935e3caf510be0c503c97acef35381b2_5220	36ade0437952544bcc39850c777ef069_4605	S_aureus_9_01812
alr		alanine racemase	4	4	1	6	2920				1148	1148	1148	e26b52046ef139bf63509f5b590c18e0_4077	935e3caf510be0c503c97acef35381b2_5548	36ade0437952544bcc39850c777ef069_4269	S_aureus_9_01416
thrC		threonine synthase	4	4	1	6	230				1061	1061	1061	e26b52046ef139bf63509f5b590c18e0_2424	935e3caf510be0c503c97acef35381b2_1577	36ade0437952544bcc39850c777ef069_2726	S_aureus_9_01888
ureE		urease accessory protein UreE	4	4	1	6	358				452	452	452	e26b52046ef139bf63509f5b590c18e0_4538	935e3caf510be0c503c97acef35381b2_5092	36ade0437952544bcc39850c777ef069_4735	S_aureus_9_01873
WP_000070866.1		DNA starvation/stationary phase protection protein	4	4	1	6	78				443	443	443	e26b52046ef139bf63509f5b590c18e0_4216	935e3caf510be0c503c97acef35381b2_5409	36ade0437952544bcc39850c777ef069_4408	S_aureus_9_01483
radA		DNA repair protein RadA	4	4	1	6	2124				1364	1364	1364	e26b52046ef139bf63509f5b590c18e0_948	935e3caf510be0c503c97acef35381b2_3100	36ade0437952544bcc39850c777ef069_1020	S_aureus_9_02268
WP_000958531.1		P-loop NTPase	4	4	1	6	862				1064	1064	1064	e26b52046ef139bf63509f5b590c18e0_4298	935e3caf510be0c503c97acef35381b2_5332	36ade0437952544bcc39850c777ef069_4491	S_aureus_9_02333
WP_000472256.1		prepilin-type N-terminal cleavage/methylation domain-containing protein	4	4	1	6	1623				311	311	311	e26b52046ef139bf63509f5b590c18e0_2889	935e3caf510be0c503c97acef35381b2_1001	36ade0437952544bcc39850c777ef069_3169	S_aureus_9_00148
perR		peroxide-responsive transcriptional repressor PerR	4	4	1	6	2865				446	446	446	e26b52046ef139bf63509f5b590c18e0_3642	935e3caf510be0c503c97acef35381b2_235	36ade0437952544bcc39850c777ef069_3930	S_aureus_9_02008
WP_000477989.1		MurR/RpiR family transcriptional regulator	4	4	1	6	393				764	764	764	e26b52046ef139bf63509f5b590c18e0_4608	935e3caf510be0c503c97acef35381b2_5022	36ade0437952544bcc39850c777ef069_4805	S_aureus_9_01737
WP_000455861.1		CHAP domain-containing protein	4	4	1	6	3172				431	431	431	e26b52046ef139bf63509f5b590c18e0_5071	935e3caf510be0c503c97acef35381b2_4571	36ade0437952544bcc39850c777ef069_5252	S_aureus_9_00506
WP_000766009.1		DoxX family protein	4	4	1	6	686				356	356	356	e26b52046ef139bf63509f5b590c18e0_1830	935e3caf510be0c503c97acef35381b2_2187	36ade0437952544bcc39850c777ef069_2078	S_aureus_9_01113
WP_000664738.1		NYN domain-containing protein	4	4	1	6	2117				524	524	524	e26b52046ef139bf63509f5b590c18e0_962	935e3caf510be0c503c97acef35381b2_3086	36ade0437952544bcc39850c777ef069_1034	S_aureus_9_02275
ygs		S1 domain-containing post-transcriptional regulator Ygs	4	4	1	6	1012				377	377	377	e26b52046ef139bf63509f5b590c18e0_1660	935e3caf510be0c503c97acef35381b2_2358	36ade0437952544bcc39850c777ef069_1906	S_aureus_9_00765
WP_000073195.1		MurR/RpiR family transcriptional regulator	4	4	1	6	384				872	872	872	e26b52046ef139bf63509f5b590c18e0_4590	935e3caf510be0c503c97acef35381b2_5040	36ade0437952544bcc39850c777ef069_4787	S_aureus_9_01728
efp		elongation factor P	4	4	1	6	1609				557	557	557	e26b52046ef139bf63509f5b590c18e0_2860	935e3caf510be0c503c97acef35381b2_1030	36ade0437952544bcc39850c777ef069_3140	S_aureus_9_00135
WP_001094394.1		F0F1 ATP synthase subunit epsilon	4	4	1	6	2890				404	404	404	e26b52046ef139bf63509f5b590c18e0_4142	935e3caf510be0c503c97acef35381b2_5483	36ade0437952544bcc39850c777ef069_4334	S_aureus_9_01446
WP_000908182.1		ABC transporter ATP-binding protein	4	4	1	6	92				782	782	782	e26b52046ef139bf63509f5b590c18e0_4240	935e3caf510be0c503c97acef35381b2_5383	36ade0437952544bcc39850c777ef069_4438	S_aureus_9_01493
WP_000965161.1		DUF443 family protein	4	5	1.25	6	2051				632	641	635	e26b52046ef139bf63509f5b590c18e0_1097	935e3caf510be0c503c97acef35381b2_2953	36ade0437952544bcc39850c777ef069_1165	S_aureus_9_02209 S_aureus_9_02200
rpsF		30S ribosomal protein S6	4	4	1	6	2759				296	296	296	e26b52046ef139bf63509f5b590c18e0_610	935e3caf510be0c503c97acef35381b2_3462	36ade0437952544bcc39850c777ef069_654	S_aureus_9_01544
atpA		F0F1 ATP synthase subunit alpha	4	4	1	6	2884				1508	1508	1508	e26b52046ef139bf63509f5b590c18e0_4148	935e3caf510be0c503c97acef35381b2_5477	36ade0437952544bcc39850c777ef069_4340	S_aureus_9_01449
WP_000966288.1		membrane protein	4	4	1	6	1466				524	524	524	e26b52046ef139bf63509f5b590c18e0_3824	935e3caf510be0c503c97acef35381b2_87	36ade0437952544bcc39850c777ef069_4078	S_aureus_9_02554
WP_000723301.1		NAD-dependent epimerase/dehydratase family protein	4	4	1	6	2096				965	965	965	e26b52046ef139bf63509f5b590c18e0_1005	935e3caf510be0c503c97acef35381b2_3043	36ade0437952544bcc39850c777ef069_1077	S_aureus_9_02295
WP_000138487.1		Glu/Leu/Phe/Val dehydrogenase	4	4	1	6	1009				1244	1244	1244	e26b52046ef139bf63509f5b590c18e0_1666	935e3caf510be0c503c97acef35381b2_2352	36ade0437952544bcc39850c777ef069_1912	S_aureus_9_00762
mspA		membrane stabilizing protein MspA	4	4	1	6	771				317	317	317	e26b52046ef139bf63509f5b590c18e0_4476	935e3caf510be0c503c97acef35381b2_5154	36ade0437952544bcc39850c777ef069_4671	S_aureus_9_01843
WP_001016166.1		aspartate carbamoyltransferase catalytic subunit	4	4	1	6	469				881	881	881	e26b52046ef139bf63509f5b590c18e0_2170	935e3caf510be0c503c97acef35381b2_1847	36ade0437952544bcc39850c777ef069_2422	S_aureus_9_00698
pruA		L-glutamate gamma-semialdehyde dehydrogenase	4	4	1	6	3160				1544	1544	1544	e26b52046ef139bf63509f5b590c18e0_5095	935e3caf510be0c503c97acef35381b2_4549	36ade0437952544bcc39850c777ef069_5274	S_aureus_9_00517
hslV		ATP-dependent protease subunit HslV	4	4	1	6	318				545	545	545	e26b52046ef139bf63509f5b590c18e0_2276	935e3caf510be0c503c97acef35381b2_1741	36ade0437952544bcc39850c777ef069_2526	S_aureus_9_00647
WP_000412514.1		APC family permease	4	4	1	6	2066				1484	1484	1484	e26b52046ef139bf63509f5b590c18e0_1065	935e3caf510be0c503c97acef35381b2_2983	36ade0437952544bcc39850c777ef069_1137	S_aureus_9_02187
WP_001788287.1		YwhD family protein	4	4	1	6	2032				506	521	517	e26b52046ef139bf63509f5b590c18e0_1129	935e3caf510be0c503c97acef35381b2_2921	36ade0437952544bcc39850c777ef069_1197	S_aureus_9_02542
aspS		aspartate--tRNA ligase	4	4	1	6	1710				1766	1766	1766	e26b52046ef139bf63509f5b590c18e0_3062	935e3caf510be0c503c97acef35381b2_824	36ade0437952544bcc39850c777ef069_3342	S_aureus_9_00231
WP_000088195.1		cysteine hydrolase	4	4	1	6	3063				560	560	560	e26b52046ef139bf63509f5b590c18e0_5291	935e3caf510be0c503c97acef35381b2_4349	36ade0437952544bcc39850c777ef069_5474	S_aureus_9_00607
WP_000977022.1		LytTR family DNA-binding domain-containing protein	4	4	1	6	437				443	443	443	e26b52046ef139bf63509f5b590c18e0_4691	935e3caf510be0c503c97acef35381b2_4943	36ade0437952544bcc39850c777ef069_4884	S_aureus_9_01774
pyk		pyruvate kinase	4	4	1	6	1771				1757	1757	1757	e26b52046ef139bf63509f5b590c18e0_3191	935e3caf510be0c503c97acef35381b2_696	36ade0437952544bcc39850c777ef069_3471	S_aureus_9_00287
WP_000290301.1		YlbF/YmcA family competence regulator	4	4	1	6	2850				344	344	344	e26b52046ef139bf63509f5b590c18e0_3515	935e3caf510be0c503c97acef35381b2_358	36ade0437952544bcc39850c777ef069_3805	S_aureus_9_02245
qoxA		cytochrome aa3 quinol oxidase subunit II	4	4	1	6	711				1100	1100	1100	e26b52046ef139bf63509f5b590c18e0_1882	935e3caf510be0c503c97acef35381b2_2135	36ade0437952544bcc39850c777ef069_2130	S_aureus_9_01089
WP_000633068.1		magnesium transporter CorA family protein	4	4	1	6	25				944	944	944	e26b52046ef139bf63509f5b590c18e0_4719	935e3caf510be0c503c97acef35381b2_4913	36ade0437952544bcc39850c777ef069_4912	S_aureus_9_01787
WP_000491986.1		GNAT family N-acetyltransferase	4	4	1	6	704				434	434	434	e26b52046ef139bf63509f5b590c18e0_1868	935e3caf510be0c503c97acef35381b2_2149	36ade0437952544bcc39850c777ef069_2116	S_aureus_9_01096
WP_000075714.1		heme-dependent peroxidase	4	4	1	6	2063				752	752	752	e26b52046ef139bf63509f5b590c18e0_1071	935e3caf510be0c503c97acef35381b2_2977	36ade0437952544bcc39850c777ef069_1143	S_aureus_9_02190
rplN		50S ribosomal protein L14	4	4	1	6	792				368	368	368	e26b52046ef139bf63509f5b590c18e0_4434	935e3caf510be0c503c97acef35381b2_5196	36ade0437952544bcc39850c777ef069_4629	S_aureus_9_01824
WP_001790232.1		iron ABC transporter permease	4	4	1	6	2025				950	986	959	e26b52046ef139bf63509f5b590c18e0_1143	935e3caf510be0c503c97acef35381b2_2907	36ade0437952544bcc39850c777ef069_1211	S_aureus_9_02061
WP_001108346.1		bifunctional folylpolyglutamate synthase/dihydrofolate synthase	4	4	1	6	1736				1271	1271	1271	e26b52046ef139bf63509f5b590c18e0_3115	935e3caf510be0c503c97acef35381b2_771	36ade0437952544bcc39850c777ef069_3395	S_aureus_9_00254
WP_000449218.1		NAD(P)H-hydrate dehydratase	4	4	1	6	2394				812	812	812	e26b52046ef139bf63509f5b590c18e0_15	935e3caf510be0c503c97acef35381b2_4205	36ade0437952544bcc39850c777ef069_15	S_aureus_9_01378
WP_000035058.1		peptidylprolyl isomerase	4	4	1	6	1013				593	593	593	e26b52046ef139bf63509f5b590c18e0_1658	935e3caf510be0c503c97acef35381b2_2360	36ade0437952544bcc39850c777ef069_1904	S_aureus_9_00766
argR		transcriptional regulator ArgR	4	4	1	6	1601				452	452	452	e26b52046ef139bf63509f5b590c18e0_2844	935e3caf510be0c503c97acef35381b2_1046	36ade0437952544bcc39850c777ef069_3124	S_aureus_9_00127
WP_000727328.1		DUF4889 domain-containing protein	4	4	1	6	30				356	356	356	e26b52046ef139bf63509f5b590c18e0_4729	935e3caf510be0c503c97acef35381b2_4903	36ade0437952544bcc39850c777ef069_4922	S_aureus_9_01792
WP_000082539.1		catalase	4	4	1	6	224				1517	1517	1517	e26b52046ef139bf63509f5b590c18e0_2436	935e3caf510be0c503c97acef35381b2_1565	36ade0437952544bcc39850c777ef069_2738	S_aureus_9_01893
WP_000846637.1		L-lactate dehydrogenase	4	4	1	6	3115				959	959	959	e26b52046ef139bf63509f5b590c18e0_5185	935e3caf510be0c503c97acef35381b2_4453	36ade0437952544bcc39850c777ef069_5368	S_aureus_9_00563
WP_001040736.1		GNAT family N-acetyltransferase	4	4	1	6	68				860	860	860	e26b52046ef139bf63509f5b590c18e0_4196	935e3caf510be0c503c97acef35381b2_5429	36ade0437952544bcc39850c777ef069_4388	S_aureus_9_01473
rpsC		30S ribosomal protein S3	4	4	1	6	788				653	653	653	e26b52046ef139bf63509f5b590c18e0_4442	935e3caf510be0c503c97acef35381b2_5188	36ade0437952544bcc39850c777ef069_4637	S_aureus_9_01828
WP_001220807.1		carboxylesterase	4	4	1	6	2196				734	734	734	e26b52046ef139bf63509f5b590c18e0_751	935e3caf510be0c503c97acef35381b2_3309	36ade0437952544bcc39850c777ef069_811	S_aureus_9_02142
sarX		HTH-type transcriptional regulator SarX	4	4	1	6	1969				359	425	375	e26b52046ef139bf63509f5b590c18e0_1255	935e3caf510be0c503c97acef35381b2_2795	36ade0437952544bcc39850c777ef069_1323	S_aureus_9_02515
WP_000844413.1		hypothetical protein	4	4	1	6	1621				299	299	299	e26b52046ef139bf63509f5b590c18e0_2885	935e3caf510be0c503c97acef35381b2_1005	36ade0437952544bcc39850c777ef069_3165	S_aureus_9_00146
WP_000384523.1		DUF1146 family protein	4	4	1	6	2891				233	233	233	e26b52046ef139bf63509f5b590c18e0_4138	935e3caf510be0c503c97acef35381b2_5487	36ade0437952544bcc39850c777ef069_4330	S_aureus_9_01445
WP_000011542.1		DUF2179 domain-containing protein	4	4	1	6	1484				602	602	602	e26b52046ef139bf63509f5b590c18e0_3786	935e3caf510be0c503c97acef35381b2_125	36ade0437952544bcc39850c777ef069_4040	S_aureus_9_01957
WP_000147103.1		beta-class phenol-soluble modulin	4	4	1	6	444				134	134	134	e26b52046ef139bf63509f5b590c18e0_2118	935e3caf510be0c503c97acef35381b2_1899	36ade0437952544bcc39850c777ef069_2370	S_aureus_9_00723
WP_001068337.1		YuzB family protein	4	4	1	6	1028				236	236	236	e26b52046ef139bf63509f5b590c18e0_1628	935e3caf510be0c503c97acef35381b2_2390	36ade0437952544bcc39850c777ef069_1874	S_aureus_9_00781
WP_000611512.1		phage holin	4	4	1	6	972				254	254	254	e26b52046ef139bf63509f5b590c18e0_3864	935e3caf510be0c503c97acef35381b2_45	36ade0437952544bcc39850c777ef069_1812	S_aureus_9_01620
lpdA		dihydrolipoyl dehydrogenase	4	4	1	6	660				1406	1406	1406	e26b52046ef139bf63509f5b590c18e0_1955	935e3caf510be0c503c97acef35381b2_2062	36ade0437952544bcc39850c777ef069_2207	S_aureus_9_01055
WP_000584398.1		hypothetical protein	4	4	1	6	599				506	506	506	e26b52046ef139bf63509f5b590c18e0_2079	935e3caf510be0c503c97acef35381b2_1938	36ade0437952544bcc39850c777ef069_2331	S_aureus_9_00998
WP_001178942.1		DEAD/DEAH box helicase	4	4	1	6	2909				1520	1520	1520	e26b52046ef139bf63509f5b590c18e0_4099	935e3caf510be0c503c97acef35381b2_5526	36ade0437952544bcc39850c777ef069_4291	S_aureus_9_01426
WP_000398941.1		ABC transporter permease	4	4	1	6	2994				695	695	695	e26b52046ef139bf63509f5b590c18e0_4859	935e3caf510be0c503c97acef35381b2_4769	36ade0437952544bcc39850c777ef069_5054	S_aureus_9_00412
WP_000367064.1		sugar efflux transporter	4	4	1	6	1963				1220	1292	1238	e26b52046ef139bf63509f5b590c18e0_1267	935e3caf510be0c503c97acef35381b2_2783	36ade0437952544bcc39850c777ef069_1335	S_aureus_9_01213
gap		type I glyceraldehyde-3-phosphate dehydrogenase	4	4	1	6	1761				1025	1025	1025	e26b52046ef139bf63509f5b590c18e0_3169	935e3caf510be0c503c97acef35381b2_716	36ade0437952544bcc39850c777ef069_3449	S_aureus_9_00277
purE		5-(carboxyamino)imidazole ribonucleotide mutase	4	4	1	6	715				482	482	482	e26b52046ef139bf63509f5b590c18e0_1890	935e3caf510be0c503c97acef35381b2_2127	36ade0437952544bcc39850c777ef069_2138	S_aureus_9_01086
WP_000031892.1		ribosomal L7Ae/L30e/S12e/Gadd45 family protein	4	4	1	6	2105				254	254	254	e26b52046ef139bf63509f5b590c18e0_987	935e3caf510be0c503c97acef35381b2_3061	36ade0437952544bcc39850c777ef069_1059	S_aureus_9_02286
rplU		50S ribosomal protein L21	4	4	1	6	1727				308	308	308	e26b52046ef139bf63509f5b590c18e0_3096	935e3caf510be0c503c97acef35381b2_790	36ade0437952544bcc39850c777ef069_3376	S_aureus_9_00248
srrA		two-component system response regulator SrrA	4	4	1	6	947				725	725	725	e26b52046ef139bf63509f5b590c18e0_2786	935e3caf510be0c503c97acef35381b2_1104	36ade0437952544bcc39850c777ef069_3064	S_aureus_9_00099
WP_000538766.1		DUF420 domain-containing protein	4	4	1	6	639				461	461	461	e26b52046ef139bf63509f5b590c18e0_1997	935e3caf510be0c503c97acef35381b2_2020	36ade0437952544bcc39850c777ef069_2249	S_aureus_9_01035
clpP		ATP-dependent Clp endopeptidase proteolytic subunit ClpP	4	4	1	6	1140				587	587	587	e26b52046ef139bf63509f5b590c18e0_1468	935e3caf510be0c503c97acef35381b2_2582	36ade0437952544bcc39850c777ef069_1536	S_aureus_9_01309
msrA		peptide-methionine (S)-S-oxide reductase MsrA	4	4	1	6	133				533	533	533	e26b52046ef139bf63509f5b590c18e0_2622	935e3caf510be0c503c97acef35381b2_1374	36ade0437952544bcc39850c777ef069_2922	S_aureus_9_00034
coaBC		bifunctional phosphopantothenoylcysteine decarboxylase/phosphopantothenate--cysteine ligase CoaBC	4	4	1	6	480				1199	1199	1199	e26b52046ef139bf63509f5b590c18e0_2192	935e3caf510be0c503c97acef35381b2_1825	36ade0437952544bcc39850c777ef069_2444	S_aureus_9_00687
frr		ribosome recycling factor	4	4	1	6	310				554	554	554	e26b52046ef139bf63509f5b590c18e0_2292	935e3caf510be0c503c97acef35381b2_1725	36ade0437952544bcc39850c777ef069_2542	S_aureus_9_00641
WP_000733433.1		hypothetical protein	4	4	1	6	1959				389	395	393	e26b52046ef139bf63509f5b590c18e0_1275	935e3caf510be0c503c97acef35381b2_2775	36ade0437952544bcc39850c777ef069_1343	S_aureus_9_01217
mscL		large conductance mechanosensitive channel protein MscL	4	4	1	6	209				362	362	362	e26b52046ef139bf63509f5b590c18e0_2466	935e3caf510be0c503c97acef35381b2_1535	36ade0437952544bcc39850c777ef069_2768	S_aureus_9_01906
WP_000654030.1		sugar-binding transcriptional regulator	4	4	1	6	1143				1013	1013	1013	e26b52046ef139bf63509f5b590c18e0_1474	935e3caf510be0c503c97acef35381b2_2576	36ade0437952544bcc39850c777ef069_1542	S_aureus_9_00883
WP_000763768.1		general stress protein	4	4	1	6	2781				407	407	407	e26b52046ef139bf63509f5b590c18e0_654	935e3caf510be0c503c97acef35381b2_3418	36ade0437952544bcc39850c777ef069_698	S_aureus_9_01522
copZ		copper chaperone CopZ	4	4	1	6	3156				206	206	206	e26b52046ef139bf63509f5b590c18e0_5103	935e3caf510be0c503c97acef35381b2_4541	36ade0437952544bcc39850c777ef069_5282	S_aureus_9_00521
WP_000437472.1		phosphocarrier protein HPr	4	4	1	6	733				266	266	266	e26b52046ef139bf63509f5b590c18e0_1927	935e3caf510be0c503c97acef35381b2_2090	36ade0437952544bcc39850c777ef069_2175	S_aureus_9_01068
lspA		signal peptidase II	4	4	1	6	465				491	491	491	e26b52046ef139bf63509f5b590c18e0_2162	935e3caf510be0c503c97acef35381b2_1855	36ade0437952544bcc39850c777ef069_2414	S_aureus_9_00702
WP_000872486.1		D-ribitol-5-phosphate cytidylyltransferase	4	4	1	6	2661				716	716	716	e26b52046ef139bf63509f5b590c18e0_393	935e3caf510be0c503c97acef35381b2_3689	36ade0437952544bcc39850c777ef069_433	S_aureus_9_01167
WP_000727423.1		YlxR family protein	4	4	1	6	302				284	284	284	e26b52046ef139bf63509f5b590c18e0_2308	935e3caf510be0c503c97acef35381b2_1709	36ade0437952544bcc39850c777ef069_2558	S_aureus_9_00633
eno		phosphopyruvate hydratase	4	4	1	6	1148				1304	1304	1304	e26b52046ef139bf63509f5b590c18e0_1484	935e3caf510be0c503c97acef35381b2_2566	36ade0437952544bcc39850c777ef069_1552	S_aureus_9_00878
WP_000648723.1		mannitol-1-phosphate 5-dehydrogenase	4	4	1	6	97				1106	1106	1106	e26b52046ef139bf63509f5b590c18e0_4250	935e3caf510be0c503c97acef35381b2_5373	36ade0437952544bcc39850c777ef069_4448	S_aureus_9_01498
phrB		DNA photolyase family protein	4	4	1	6	1945				1373	1373	1373	e26b52046ef139bf63509f5b590c18e0_1303	935e3caf510be0c503c97acef35381b2_2747	36ade0437952544bcc39850c777ef069_1371	S_aureus_9_01231
WP_001549718.1		YdcF family protein	4	4	1	6	427				968	968	968	e26b52046ef139bf63509f5b590c18e0_4679	935e3caf510be0c503c97acef35381b2_4953	36ade0437952544bcc39850c777ef069_4874	S_aureus_9_01769
WP_000455597.1		UPF0223 family protein	4	4	1	6	659				275	275	275	e26b52046ef139bf63509f5b590c18e0_1957	935e3caf510be0c503c97acef35381b2_2060	36ade0437952544bcc39850c777ef069_2209	S_aureus_9_01054
guaB		IMP dehydrogenase	4	4	1	6	2784				1466	1466	1466	e26b52046ef139bf63509f5b590c18e0_661	935e3caf510be0c503c97acef35381b2_3411	36ade0437952544bcc39850c777ef069_705	S_aureus_9_01519
WP_000180416.1		hypothetical protein	4	4	1	6	1947				287	287	287	e26b52046ef139bf63509f5b590c18e0_1299	935e3caf510be0c503c97acef35381b2_2751	36ade0437952544bcc39850c777ef069_1367	S_aureus_9_01229
parE		DNA topoisomerase IV subunit B	4	4	1	6	203				1991	1991	1991	e26b52046ef139bf63509f5b590c18e0_2478	935e3caf510be0c503c97acef35381b2_1523	36ade0437952544bcc39850c777ef069_2780	S_aureus_9_01912
WP_000447709.1		DUF4176 domain-containing protein	4	4	1	6	3130				296	296	296	e26b52046ef139bf63509f5b590c18e0_5155	935e3caf510be0c503c97acef35381b2_4487	36ade0437952544bcc39850c777ef069_5336	S_aureus_9_00547
WP_000021445.1		S1 domain-containing RNA-binding protein	4	4	1	6	2143				401	401	401	e26b52046ef139bf63509f5b590c18e0_874	935e3caf510be0c503c97acef35381b2_3186	36ade0437952544bcc39850c777ef069_934	S_aureus_9_02394
fakA		fatty acid kinase catalytic subunit FakA	4	4	1	6	495				1646	1646	1646	e26b52046ef139bf63509f5b590c18e0_2222	935e3caf510be0c503c97acef35381b2_1795	36ade0437952544bcc39850c777ef069_2474	S_aureus_9_00672
mreC		rod shape-determining protein MreC	4	4	1	6	1729				842	842	842	e26b52046ef139bf63509f5b590c18e0_3101	935e3caf510be0c503c97acef35381b2_785	36ade0437952544bcc39850c777ef069_3381	S_aureus_9_00250
qoxC		cytochrome aa3 quinol oxidase subunit III	4	4	1	6	709				605	605	605	e26b52046ef139bf63509f5b590c18e0_1878	935e3caf510be0c503c97acef35381b2_2139	36ade0437952544bcc39850c777ef069_2126	S_aureus_9_01091
WP_000154465.1		hypothetical protein	4	4	1	6	1944				284	284	284	e26b52046ef139bf63509f5b590c18e0_1305	935e3caf510be0c503c97acef35381b2_2745	36ade0437952544bcc39850c777ef069_1373	S_aureus_9_01232
WP_001032833.1		N-acetylglucosaminidase	4	4	1	6	1853				854	854	854	e26b52046ef139bf63509f5b590c18e0_3358	935e3caf510be0c503c97acef35381b2_533	36ade0437952544bcc39850c777ef069_3632	S_aureus_9_02432
WP_000966142.1		CcdC family protein	4	4	1	6	212				467	467	467	e26b52046ef139bf63509f5b590c18e0_2460	935e3caf510be0c503c97acef35381b2_1541	36ade0437952544bcc39850c777ef069_2762	S_aureus_9_01903
WP_000798967.1		DUF1450 domain-containing protein	4	4	1	6	2057				341	341	341	e26b52046ef139bf63509f5b590c18e0_1083	935e3caf510be0c503c97acef35381b2_2965	36ade0437952544bcc39850c777ef069_1155	S_aureus_9_02196
WP_000002683.1		DUF2273 domain-containing protein	4	4	1	6	843				239	239	239	e26b52046ef139bf63509f5b590c18e0_4336	935e3caf510be0c503c97acef35381b2_5296	36ade0437952544bcc39850c777ef069_4527	S_aureus_9_02316
WP_000980137.1		membrane protein	4	4	1	6	1983				1067	1067	1067	e26b52046ef139bf63509f5b590c18e0_1227	935e3caf510be0c503c97acef35381b2_2823	36ade0437952544bcc39850c777ef069_1295	S_aureus_9_02020
rsmD		16S rRNA (guanine(966)-N(2))-methyltransferase RsmD	4	4	1	6	633				542	542	542	e26b52046ef139bf63509f5b590c18e0_2009	935e3caf510be0c503c97acef35381b2_2008	36ade0437952544bcc39850c777ef069_2261	S_aureus_9_01029
WP_000140679.1		F0F1 ATP synthase subunit B	4	4	1	6	2882				521	521	521	e26b52046ef139bf63509f5b590c18e0_4152	935e3caf510be0c503c97acef35381b2_5473	36ade0437952544bcc39850c777ef069_4344	S_aureus_9_01451
WP_000011688.1		sterile alpha motif-like domain-containing protein	4	4	1	6	3106				212	212	212	e26b52046ef139bf63509f5b590c18e0_5203	935e3caf510be0c503c97acef35381b2_4435	36ade0437952544bcc39850c777ef069_5386	S_aureus_9_00571
WP_001549577.1		YjiH family protein	4	4	1	6	853				1370	1370	1370	e26b52046ef139bf63509f5b590c18e0_4314	935e3caf510be0c503c97acef35381b2_5316	36ade0437952544bcc39850c777ef069_4507	S_aureus_9_02325
WP_001027143.1		hypothetical protein	4	4	1	6	236				188	188	188	e26b52046ef139bf63509f5b590c18e0_2412	935e3caf510be0c503c97acef35381b2_1589	36ade0437952544bcc39850c777ef069_2714	S_aureus_9_02548
WP_064136500.1		aminotransferase class IV	4	4	1	6	1081				608	608	608	e26b52046ef139bf63509f5b590c18e0_1351	935e3caf510be0c503c97acef35381b2_2699	36ade0437952544bcc39850c777ef069_1419	S_aureus_9_01255
ureC		urease subunit alpha	4	4	1	6	357				1715	1715	1715	e26b52046ef139bf63509f5b590c18e0_4536	935e3caf510be0c503c97acef35381b2_5094	36ade0437952544bcc39850c777ef069_4733	S_aureus_9_01872
yabA		DNA replication initiation control protein YabA	4	4	1	6	2165				347	347	347	e26b52046ef139bf63509f5b590c18e0_828	935e3caf510be0c503c97acef35381b2_3232	36ade0437952544bcc39850c777ef069_888	S_aureus_9_02416
rplV		50S ribosomal protein L22	4	4	1	6	787				353	353	353	e26b52046ef139bf63509f5b590c18e0_4444	935e3caf510be0c503c97acef35381b2_5186	36ade0437952544bcc39850c777ef069_4639	S_aureus_9_01829
folK		2-amino-4-hydroxy-6-hydroxymethyldihydropteridine diphosphokinase	4	4	1	6	2135				476	476	476	e26b52046ef139bf63509f5b590c18e0_890	935e3caf510be0c503c97acef35381b2_3170	36ade0437952544bcc39850c777ef069_950	S_aureus_9_02386
WP_001141883.1		NifU family protein	4	4	1	6	1031				242	242	242	e26b52046ef139bf63509f5b590c18e0_1622	935e3caf510be0c503c97acef35381b2_2396	36ade0437952544bcc39850c777ef069_1868	S_aureus_9_00784
rpmH		50S ribosomal protein L34	4	4	1	6	2387				137	137	137	e26b52046ef139bf63509f5b590c18e0_5429	935e3caf510be0c503c97acef35381b2_4219	36ade0437952544bcc39850c777ef069_5612	S_aureus_9_01371
dnaJ		molecular chaperone DnaJ	4	4	1	6	1660				1139	1139	1139	e26b52046ef139bf63509f5b590c18e0_2963	935e3caf510be0c503c97acef35381b2_927	36ade0437952544bcc39850c777ef069_3243	S_aureus_9_00184
dnaN		DNA polymerase III subunit beta	4	4	1	6	2389				1133	1133	1133	e26b52046ef139bf63509f5b590c18e0_5	935e3caf510be0c503c97acef35381b2_4215	36ade0437952544bcc39850c777ef069_5	S_aureus_9_01373
WP_001019340.1		acetyl-CoA carboxylase biotin carboxyl carrier protein subunit	4	4	1	6	1686				449	449	449	e26b52046ef139bf63509f5b590c18e0_3013	935e3caf510be0c503c97acef35381b2_873	36ade0437952544bcc39850c777ef069_3293	S_aureus_9_00209
WP_000874681.1		superoxide dismutase	4	4	1	6	2540				599	599	599	e26b52046ef139bf63509f5b590c18e0_159	935e3caf510be0c503c97acef35381b2_3947	36ade0437952544bcc39850c777ef069_181	S_aureus_9_00954
hisC		histidinol-phosphate transaminase	4	4	1	6	1090				929	1058	1025	e26b52046ef139bf63509f5b590c18e0_1369	935e3caf510be0c503c97acef35381b2_2681	36ade0437952544bcc39850c777ef069_1437	S_aureus_9_01263
mnhF2		Na+/H+ antiporter Mnh2 subunit F	4	4	1	6	2009				302	302	302	e26b52046ef139bf63509f5b590c18e0_1175	935e3caf510be0c503c97acef35381b2_2875	36ade0437952544bcc39850c777ef069_1243	S_aureus_9_02045
mnhG1		Na+/H+ antiporter Mnh1 subunit G	4	4	1	6	1021				356	356	356	e26b52046ef139bf63509f5b590c18e0_1642	935e3caf510be0c503c97acef35381b2_2376	36ade0437952544bcc39850c777ef069_1888	S_aureus_9_00774
upp		uracil phosphoribosyltransferase	4	4	1	6	2877				629	629	629	e26b52046ef139bf63509f5b590c18e0_4162	935e3caf510be0c503c97acef35381b2_5463	36ade0437952544bcc39850c777ef069_4354	S_aureus_9_01456
WP_001021468.1		adenylate kinase	4	4	1	6	803				647	647	647	e26b52046ef139bf63509f5b590c18e0_4412	935e3caf510be0c503c97acef35381b2_5218	36ade0437952544bcc39850c777ef069_4607	S_aureus_9_01813
sarU		HTH-type transcriptional regulator SarU	4	4	1	6	3225				743	743	743	e26b52046ef139bf63509f5b590c18e0_4973	935e3caf510be0c503c97acef35381b2_4665	36ade0437952544bcc39850c777ef069_5152	S_aureus_9_00459
WP_000157650.1		50S ribosomal protein L25/general stress protein Ctc	4	4	1	6	2150				653	653	653	e26b52046ef139bf63509f5b590c18e0_860	935e3caf510be0c503c97acef35381b2_3200	36ade0437952544bcc39850c777ef069_920	S_aureus_9_02401
WP_000606480.1		YlbF family regulator	4	4	1	6	637				434	434	434	e26b52046ef139bf63509f5b590c18e0_2001	935e3caf510be0c503c97acef35381b2_2016	36ade0437952544bcc39850c777ef069_2253	S_aureus_9_01033
WP_001017131.1		sensor histidine kinase	4	4	1	6	1513				1043	1043	1043	e26b52046ef139bf63509f5b590c18e0_3726	935e3caf510be0c503c97acef35381b2_185	36ade0437952544bcc39850c777ef069_3980	S_aureus_9_01984
WP_001292149.1		PTS sugar transporter subunit IIA	4	4	1	6	96				434	434	434	e26b52046ef139bf63509f5b590c18e0_4248	935e3caf510be0c503c97acef35381b2_5375	36ade0437952544bcc39850c777ef069_4446	S_aureus_9_01497
yajC		preprotein translocase subunit YajC	4	4	1	6	1718				260	260	260	e26b52046ef139bf63509f5b590c18e0_3078	935e3caf510be0c503c97acef35381b2_808	36ade0437952544bcc39850c777ef069_3358	S_aureus_9_00239
sasG		LPXTG-anchored surface protein SasG	4	4	1	6	3227				458	3731	2208	e26b52046ef139bf63509f5b590c18e0_4969	935e3caf510be0c503c97acef35381b2_4669	36ade0437952544bcc39850c777ef069_5148	S_aureus_9_00457
rpmB		50S ribosomal protein L28	4	4	1	6	493				188	188	188	e26b52046ef139bf63509f5b590c18e0_2218	935e3caf510be0c503c97acef35381b2_1799	36ade0437952544bcc39850c777ef069_2470	S_aureus_9_00674
WP_000829750.1		hypothetical protein	4	4	1	6	1680				269	269	269	e26b52046ef139bf63509f5b590c18e0_3003	935e3caf510be0c503c97acef35381b2_885	36ade0437952544bcc39850c777ef069_3283	S_aureus_9_00204
esxA		WXG100 family type VII secretion effector EsxA	4	4	1	6	2280				293	293	293	e26b52046ef139bf63509f5b590c18e0_455	935e3caf510be0c503c97acef35381b2_3633	36ade0437952544bcc39850c777ef069_493	S_aureus_9_01195
WP_001253464.1		DUF2871 domain-containing protein	4	4	1	6	22				431	431	431	e26b52046ef139bf63509f5b590c18e0_4713	935e3caf510be0c503c97acef35381b2_4919	36ade0437952544bcc39850c777ef069_4906	S_aureus_9_01784
mnhC2		Na+/H+ antiporter Mnh2 subunit C	4	4	1	6	2012				344	344	344	e26b52046ef139bf63509f5b590c18e0_1169	935e3caf510be0c503c97acef35381b2_2881	36ade0437952544bcc39850c777ef069_1237	S_aureus_9_02048
WP_000828570.1		TetR/AcrR family transcriptional regulator	4	4	1	6	422				551	551	551	e26b52046ef139bf63509f5b590c18e0_4669	935e3caf510be0c503c97acef35381b2_4963	36ade0437952544bcc39850c777ef069_4864	S_aureus_9_01765
WP_001018871.1		MTH1187 family thiamine-binding protein	4	4	1	6	1627				329	329	329	e26b52046ef139bf63509f5b590c18e0_2897	935e3caf510be0c503c97acef35381b2_993	36ade0437952544bcc39850c777ef069_3177	S_aureus_9_00152
WP_000765183.1		DUF423 domain-containing protein	4	4	1	6	2067				368	368	368	e26b52046ef139bf63509f5b590c18e0_1063	935e3caf510be0c503c97acef35381b2_2985	36ade0437952544bcc39850c777ef069_1135	S_aureus_9_02186
WP_000840811.1		DUF1641 domain-containing protein	4	4	1	6	376				473	473	473	e26b52046ef139bf63509f5b590c18e0_4574	935e3caf510be0c503c97acef35381b2_5056	36ade0437952544bcc39850c777ef069_4771	S_aureus_9_01721
WP_001020625.1		XRE family transcriptional regulator	4	4	1	6	658				539	539	539	e26b52046ef139bf63509f5b590c18e0_1959	935e3caf510be0c503c97acef35381b2_2058	36ade0437952544bcc39850c777ef069_2211	S_aureus_9_01053
WP_000876318.1		ABC transporter permease	4	4	1	6	1100				971	1013	981	e26b52046ef139bf63509f5b590c18e0_1391	935e3caf510be0c503c97acef35381b2_2657	36ade0437952544bcc39850c777ef069_1461	S_aureus_9_01272
WP_000882085.1		DUF443 family protein	4	4	1	6	2044				620	620	620	e26b52046ef139bf63509f5b590c18e0_1105	935e3caf510be0c503c97acef35381b2_2945	36ade0437952544bcc39850c777ef069_1173	S_aureus_9_02212
WP_000670300.1		sensor histidine kinase	4	4	1	6	238				1091	1091	1091	e26b52046ef139bf63509f5b590c18e0_2408	935e3caf510be0c503c97acef35381b2_1593	36ade0437952544bcc39850c777ef069_2710	S_aureus_9_02546
WP_000404422.1		L-threonylcarbamoyladenylate synthase	4	4	1	6	990				641	641	641	e26b52046ef139bf63509f5b590c18e0_1704	935e3caf510be0c503c97acef35381b2_2314	36ade0437952544bcc39850c777ef069_1952	S_aureus_9_00743
WP_000669376.1		RluA family pseudouridine synthase	4	4	1	6	2855				821	821	821	e26b52046ef139bf63509f5b590c18e0_3525	935e3caf510be0c503c97acef35381b2_348	36ade0437952544bcc39850c777ef069_3815	S_aureus_9_02250
WP_000193751.1		peptide MFS transporter	4	4	1	6	1093				1505	1505	1505	e26b52046ef139bf63509f5b590c18e0_1377	935e3caf510be0c503c97acef35381b2_2673	36ade0437952544bcc39850c777ef069_1445	S_aureus_9_01266
WP_001140799.1		type Z 30S ribosomal protein S14	4	4	1	6	795				185	185	185	e26b52046ef139bf63509f5b590c18e0_4428	935e3caf510be0c503c97acef35381b2_5202	36ade0437952544bcc39850c777ef069_4623	S_aureus_9_01821
WP_000426912.1		IreB family regulatory phosphoprotein	4	4	1	6	1696				260	260	260	e26b52046ef139bf63509f5b590c18e0_3033	935e3caf510be0c503c97acef35381b2_853	36ade0437952544bcc39850c777ef069_3313	S_aureus_9_00219
WP_000808817.1		hypothetical protein	4	4	1	6	81				230	230	230	e26b52046ef139bf63509f5b590c18e0_4222	935e3caf510be0c503c97acef35381b2_5403	36ade0437952544bcc39850c777ef069_4414	S_aureus_9_01486
folB		dihydroneopterin aldolase	4	4	1	6	2136				365	365	365	e26b52046ef139bf63509f5b590c18e0_888	935e3caf510be0c503c97acef35381b2_3172	36ade0437952544bcc39850c777ef069_948	S_aureus_9_02387
hpt		hypoxanthine phosphoribosyltransferase	4	4	1	6	2141				539	539	539	e26b52046ef139bf63509f5b590c18e0_878	935e3caf510be0c503c97acef35381b2_3182	36ade0437952544bcc39850c777ef069_938	S_aureus_9_02392
WP_064136495.1		GrpB family protein	4	4	1	6	1106				518	518	518	e26b52046ef139bf63509f5b590c18e0_1403	935e3caf510be0c503c97acef35381b2_2645	36ade0437952544bcc39850c777ef069_1473	S_aureus_9_01278
WP_000120494.1		serine hydroxymethyltransferase	4	4	1	6	2876				1238	1238	1238	e26b52046ef139bf63509f5b590c18e0_4164	935e3caf510be0c503c97acef35381b2_5461	36ade0437952544bcc39850c777ef069_4356	S_aureus_9_01457
WP_000867357.1		TM2 domain-containing protein	4	4	1	6	689				215	215	215	e26b52046ef139bf63509f5b590c18e0_1836	935e3caf510be0c503c97acef35381b2_2181	36ade0437952544bcc39850c777ef069_2084	S_aureus_9_01110
WP_000533238.1		divalent metal cation transporter	4	4	1	6	1683				1229	1229	1229	e26b52046ef139bf63509f5b590c18e0_3007	935e3caf510be0c503c97acef35381b2_879	36ade0437952544bcc39850c777ef069_3287	S_aureus_9_00206
WP_000815795.1		PTS sugar transporter subunit IIB	4	4	1	6	2652				278	278	278	e26b52046ef139bf63509f5b590c18e0_375	935e3caf510be0c503c97acef35381b2_3707	36ade0437952544bcc39850c777ef069_415	S_aureus_9_01158
dapD		2,3,4,5-tetrahydropyridine-2,6-dicarboxylate N-acetyltransferase	4	4	1	6	161				719	719	719	e26b52046ef139bf63509f5b590c18e0_2564	935e3caf510be0c503c97acef35381b2_1434	36ade0437952544bcc39850c777ef069_2866	S_aureus_9_00007
WP_000711870.1		BCCT family transporter	4	4	1	6	3100				1622	1622	1622	e26b52046ef139bf63509f5b590c18e0_5215	935e3caf510be0c503c97acef35381b2_4423	36ade0437952544bcc39850c777ef069_5398	S_aureus_9_00576
WP_001096494.1		transaldolase	4	4	1	6	1859				713	713	713	e26b52046ef139bf63509f5b590c18e0_3370	935e3caf510be0c503c97acef35381b2_521	36ade0437952544bcc39850c777ef069_3644	S_aureus_9_02438
WP_000904312.1		TatD family hydrolase	4	4	1	6	2160				773	773	773	e26b52046ef139bf63509f5b590c18e0_838	935e3caf510be0c503c97acef35381b2_3222	36ade0437952544bcc39850c777ef069_898	S_aureus_9_02411
rplE		50S ribosomal protein L5	4	4	1	6	794				539	539	539	e26b52046ef139bf63509f5b590c18e0_4430	935e3caf510be0c503c97acef35381b2_5200	36ade0437952544bcc39850c777ef069_4625	S_aureus_9_01822
fabI		enoyl-ACP reductase FabI	4	4	1	6	2948				770	770	770	e26b52046ef139bf63509f5b590c18e0_1768	935e3caf510be0c503c97acef35381b2_2250	36ade0437952544bcc39850c777ef069_2020	S_aureus_9_02097
fakB1		fatty acid kinase binding subunit FakB1	4	4	1	6	1116				383	866	745	e26b52046ef139bf63509f5b590c18e0_1423	935e3caf510be0c503c97acef35381b2_2625	36ade0437952544bcc39850c777ef069_1493	S_aureus_9_01288
WP_001248939.1		YvcK family protein	4	4	1	6	1138				995	995	995	e26b52046ef139bf63509f5b590c18e0_1464	935e3caf510be0c503c97acef35381b2_2586	36ade0437952544bcc39850c777ef069_1532	S_aureus_9_01306
WP_000589549.1		arsenate reductase family protein	4	4	1	6	1198				356	356	356	e26b52046ef139bf63509f5b590c18e0_1553	935e3caf510be0c503c97acef35381b2_2467	36ade0437952544bcc39850c777ef069_1667	S_aureus_9_00847
WP_000401414.1		YuzD family protein	4	4	1	6	1030				323	323	323	e26b52046ef139bf63509f5b590c18e0_1624	935e3caf510be0c503c97acef35381b2_2394	36ade0437952544bcc39850c777ef069_1870	S_aureus_9_00783
WP_000699538.1		PTS sugar transporter subunit IIB	4	4	1	6	2726				284	284	284	e26b52046ef139bf63509f5b590c18e0_541	935e3caf510be0c503c97acef35381b2_3531	36ade0437952544bcc39850c777ef069_585	S_aureus_9_01579
WP_001037807.1		DoxX family protein	4	4	1	6	1929				473	473	473	e26b52046ef139bf63509f5b590c18e0_1335	935e3caf510be0c503c97acef35381b2_2715	36ade0437952544bcc39850c777ef069_1403	S_aureus_9_01247
rpsJ		30S ribosomal protein S10	4	4	1	6	781				308	308	308	e26b52046ef139bf63509f5b590c18e0_4456	935e3caf510be0c503c97acef35381b2_5174	36ade0437952544bcc39850c777ef069_4651	S_aureus_9_01835
WP_000932073.1		ferrous iron transport protein A	4	4	1	6	3164				227	227	227	e26b52046ef139bf63509f5b590c18e0_5087	935e3caf510be0c503c97acef35381b2_4557	36ade0437952544bcc39850c777ef069_5266	S_aureus_9_00514
WP_001154224.1		MFS transporter	4	4	1	6	2943				1190	1190	1190	e26b52046ef139bf63509f5b590c18e0_1778	935e3caf510be0c503c97acef35381b2_2240	36ade0437952544bcc39850c777ef069_2030	S_aureus_9_02102
WP_000638419.1		CsbA family protein	4	4	1	6	1128				236	236	236	e26b52046ef139bf63509f5b590c18e0_1444	935e3caf510be0c503c97acef35381b2_2604	36ade0437952544bcc39850c777ef069_1514	S_aureus_9_01296
dtd		D-aminoacyl-tRNA deacylase	4	4	1	6	1713				452	452	452	e26b52046ef139bf63509f5b590c18e0_3068	935e3caf510be0c503c97acef35381b2_818	36ade0437952544bcc39850c777ef069_3348	S_aureus_9_00234
prfB		peptide chain release factor 2	4	4	1	6	1124				992	1037	1025	e26b52046ef139bf63509f5b590c18e0_1436	935e3caf510be0c503c97acef35381b2_2613	36ade0437952544bcc39850c777ef069_1506	S_aureus_9_01293
mazE		type II toxin-antitoxin system antitoxin MazE	4	4	1	6	2921				170	170	170	e26b52046ef139bf63509f5b590c18e0_4075	935e3caf510be0c503c97acef35381b2_5550	36ade0437952544bcc39850c777ef069_4267	S_aureus_9_01415
fapR		transcription factor FapR	4	4	1	6	497				572	572	572	e26b52046ef139bf63509f5b590c18e0_2226	935e3caf510be0c503c97acef35381b2_1791	36ade0437952544bcc39850c777ef069_2478	S_aureus_9_00670
WP_000545928.1		urease subunit gamma	4	4	1	6	355				302	302	302	e26b52046ef139bf63509f5b590c18e0_4532	935e3caf510be0c503c97acef35381b2_5098	36ade0437952544bcc39850c777ef069_4729	S_aureus_9_01870
WP_001055897.1		helix-turn-helix domain-containing protein	4	4	1	6	2766				263	263	263	e26b52046ef139bf63509f5b590c18e0_626	935e3caf510be0c503c97acef35381b2_3446	36ade0437952544bcc39850c777ef069_670	S_aureus_9_01535
WP_000164546.1		5-formyltetrahydrofolate cyclo-ligase	4	4	1	6	1631				539	539	539	e26b52046ef139bf63509f5b590c18e0_2905	935e3caf510be0c503c97acef35381b2_985	36ade0437952544bcc39850c777ef069_3185	S_aureus_9_00155
WP_001185421.1		MoxR family ATPase	4	4	1	6	149				791	791	791	e26b52046ef139bf63509f5b590c18e0_2590	935e3caf510be0c503c97acef35381b2_1408	36ade0437952544bcc39850c777ef069_2890	S_aureus_9_00019
WP_000868413.1		phosphatidate cytidylyltransferase	4	4	1	6	308				782	782	782	e26b52046ef139bf63509f5b590c18e0_2296	935e3caf510be0c503c97acef35381b2_1721	36ade0437952544bcc39850c777ef069_2546	S_aureus_9_00639
tagD		glycerol-3-phosphate cytidylyltransferase	4	4	1	6	1996				398	398	398	e26b52046ef139bf63509f5b590c18e0_1201	935e3caf510be0c503c97acef35381b2_2849	36ade0437952544bcc39850c777ef069_1269	S_aureus_9_02032
WP_000861038.1		CHAP domain-containing protein	4	4	1	6	973				755	755	755	e26b52046ef139bf63509f5b590c18e0_3862	935e3caf510be0c503c97acef35381b2_47	36ade0437952544bcc39850c777ef069_1814	S_aureus_9_01619
WP_001005407.1		hypothetical protein	4	4	1	6	1522				161	161	161	e26b52046ef139bf63509f5b590c18e0_3674	935e3caf510be0c503c97acef35381b2_203	36ade0437952544bcc39850c777ef069_3962	S_aureus_9_01993
WP_000032657.1		NUDIX domain-containing protein	4	4	1	6	1751				608	608	608	e26b52046ef139bf63509f5b590c18e0_3148	935e3caf510be0c503c97acef35381b2_738	36ade0437952544bcc39850c777ef069_3428	S_aureus_9_00268
moaD		molybdopterin converting factor subunit 1	4	4	1	6	760				233	233	233	e26b52046ef139bf63509f5b590c18e0_4498	935e3caf510be0c503c97acef35381b2_5132	36ade0437952544bcc39850c777ef069_4695	S_aureus_9_01853
WP_000220938.1		single-stranded DNA-binding protein	4	4	1	6	3034				281	281	281	e26b52046ef139bf63509f5b590c18e0_4929	935e3caf510be0c503c97acef35381b2_4697	36ade0437952544bcc39850c777ef069_5120	S_aureus_9_00444
glmM		phosphoglucosamine mutase	4	4	1	6	99				1355	1355	1355	e26b52046ef139bf63509f5b590c18e0_4254	935e3caf510be0c503c97acef35381b2_5369	36ade0437952544bcc39850c777ef069_4452	S_aureus_9_01500
WP_001052483.1		hypothetical protein	4	4	1	6	2758				191	191	191	e26b52046ef139bf63509f5b590c18e0_608	935e3caf510be0c503c97acef35381b2_3464	36ade0437952544bcc39850c777ef069_652	S_aureus_9_01545
WP_000215236.1		Asp23/Gls24 family envelope stress response protein	4	4	1	6	844				509	509	509	e26b52046ef139bf63509f5b590c18e0_4334	935e3caf510be0c503c97acef35381b2_5298	36ade0437952544bcc39850c777ef069_4525	S_aureus_9_02317
rpsS		30S ribosomal protein S19	4	4	1	6	786				278	278	278	e26b52046ef139bf63509f5b590c18e0_4446	935e3caf510be0c503c97acef35381b2_5184	36ade0437952544bcc39850c777ef069_4641	S_aureus_9_01830
rpe		ribulose-phosphate 3-epimerase	4	4	1	6	491				644	644	644	e26b52046ef139bf63509f5b590c18e0_2214	935e3caf510be0c503c97acef35381b2_1803	36ade0437952544bcc39850c777ef069_2466	S_aureus_9_00676
topA		type I DNA topoisomerase	4	4	1	6	321				2075	2075	2075	e26b52046ef139bf63509f5b590c18e0_2270	935e3caf510be0c503c97acef35381b2_1747	36ade0437952544bcc39850c777ef069_2520	S_aureus_9_00650
hemB		porphobilinogen synthase	4	4	1	6	1741				974	974	974	e26b52046ef139bf63509f5b590c18e0_3128	935e3caf510be0c503c97acef35381b2_758	36ade0437952544bcc39850c777ef069_3408	S_aureus_9_00259
WP_000816304.1		TIGR01777 family oxidoreductase	4	4	1	6	1141				869	902	893	e26b52046ef139bf63509f5b590c18e0_1470	935e3caf510be0c503c97acef35381b2_2580	36ade0437952544bcc39850c777ef069_1538	S_aureus_9_01310
rpsK		30S ribosomal protein S11	4	4	1	6	807				389	389	389	e26b52046ef139bf63509f5b590c18e0_4404	935e3caf510be0c503c97acef35381b2_5226	36ade0437952544bcc39850c777ef069_4599	S_aureus_9_01809
isdI		staphylobilin-forming heme oxygenase IsdI	4	4	1	6	2572				326	326	326	e26b52046ef139bf63509f5b590c18e0_215	935e3caf510be0c503c97acef35381b2_3877	36ade0437952544bcc39850c777ef069_247	S_aureus_9_00920
WP_000052076.1		hypothetical protein	4	4	1	6	1188				188	188	188	e26b52046ef139bf63509f5b590c18e0_1531	935e3caf510be0c503c97acef35381b2_2489	36ade0437952544bcc39850c777ef069_1645	S_aureus_9_00858
WP_001049150.1		YlbG family protein	4	4	1	6	635				254	254	254	e26b52046ef139bf63509f5b590c18e0_2005	935e3caf510be0c503c97acef35381b2_2012	36ade0437952544bcc39850c777ef069_2257	S_aureus_9_01031
yidD		membrane protein insertion efficiency factor YidD	4	4	1	6	1869				257	257	257	e26b52046ef139bf63509f5b590c18e0_3393	935e3caf510be0c503c97acef35381b2_500	36ade0437952544bcc39850c777ef069_3665	S_aureus_9_02448
trxA		thioredoxin	4	4	1	6	611				314	314	314	e26b52046ef139bf63509f5b590c18e0_2053	935e3caf510be0c503c97acef35381b2_1964	36ade0437952544bcc39850c777ef069_2305	S_aureus_9_01008
WP_000250823.1		glycine C-acetyltransferase	4	4	1	6	2099				1187	1187	1187	e26b52046ef139bf63509f5b590c18e0_999	935e3caf510be0c503c97acef35381b2_3049	36ade0437952544bcc39850c777ef069_1071	S_aureus_9_02292
rplI		50S ribosomal protein L9	4	4	1	6	2402				446	446	446	e26b52046ef139bf63509f5b590c18e0_33	935e3caf510be0c503c97acef35381b2_4187	36ade0437952544bcc39850c777ef069_33	S_aureus_9_01386
WP_001030771.1		alpha/beta hydrolase	4	4	1	6	1982				1043	1043	1043	e26b52046ef139bf63509f5b590c18e0_1229	935e3caf510be0c503c97acef35381b2_2821	36ade0437952544bcc39850c777ef069_1297	S_aureus_9_02019
WP_000733409.1		CAP domain-containing protein	4	4	1	6	638				1037	1037	1037	e26b52046ef139bf63509f5b590c18e0_1999	935e3caf510be0c503c97acef35381b2_2018	36ade0437952544bcc39850c777ef069_2251	S_aureus_9_01034
WP_000608179.1		hypothetical protein	4	4	1	6	1174				521	521	521	e26b52046ef139bf63509f5b590c18e0_1507	935e3caf510be0c503c97acef35381b2_2511	36ade0437952544bcc39850c777ef069_1623	S_aureus_9_00869
rpsG		30S ribosomal protein S7	4	4	1	6	2103				470	470	470	e26b52046ef139bf63509f5b590c18e0_991	935e3caf510be0c503c97acef35381b2_3057	36ade0437952544bcc39850c777ef069_1063	S_aureus_9_02288
WP_001113406.1		threonine/serine exporter ThrE family protein	4	4	1	6	1112				761	761	761	e26b52046ef139bf63509f5b590c18e0_1415	935e3caf510be0c503c97acef35381b2_2633	36ade0437952544bcc39850c777ef069_1485	S_aureus_9_01284
rpmC		50S ribosomal protein L29	4	4	1	6	790				209	209	209	e26b52046ef139bf63509f5b590c18e0_4438	935e3caf510be0c503c97acef35381b2_5192	36ade0437952544bcc39850c777ef069_4633	S_aureus_9_01826
WP_000365354.1		HAD family hydrolase	4	4	1	6	2024				719	719	719	e26b52046ef139bf63509f5b590c18e0_1145	935e3caf510be0c503c97acef35381b2_2905	36ade0437952544bcc39850c777ef069_1213	S_aureus_9_02060
WP_000377064.1		GIY-YIG nuclease family protein	4	4	1	6	2163				248	248	248	e26b52046ef139bf63509f5b590c18e0_832	935e3caf510be0c503c97acef35381b2_3228	36ade0437952544bcc39850c777ef069_892	S_aureus_9_02414
WP_000633782.1		flavodoxin family protein	4	4	1	6	2035				536	536	536	e26b52046ef139bf63509f5b590c18e0_1123	935e3caf510be0c503c97acef35381b2_2927	36ade0437952544bcc39850c777ef069_1191	S_aureus_9_02539
glmU		bifunctional UDP-N-acetylglucosamine diphosphorylase/glucosamine-1-phosphate N-acetyltransferase GlmU	4	4	1	6	2152				1352	1352	1352	e26b52046ef139bf63509f5b590c18e0_856	935e3caf510be0c503c97acef35381b2_3204	36ade0437952544bcc39850c777ef069_916	S_aureus_9_02403
WP_000057543.1		tetratricopeptide repeat protein	4	4	1	6	1134				1439	1439	1439	e26b52046ef139bf63509f5b590c18e0_1458	935e3caf510be0c503c97acef35381b2_2592	36ade0437952544bcc39850c777ef069_1526	S_aureus_9_01302
secE		preprotein translocase subunit SecE	4	4	1	6	2114				182	182	182	e26b52046ef139bf63509f5b590c18e0_968	935e3caf510be0c503c97acef35381b2_3080	36ade0437952544bcc39850c777ef069_1040	S_aureus_9_02277
WP_001127269.1		CHY zinc finger protein	4	4	1	6	1104				314	314	314	e26b52046ef139bf63509f5b590c18e0_1399	935e3caf510be0c503c97acef35381b2_2649	36ade0437952544bcc39850c777ef069_1469	S_aureus_9_01276
WP_000940129.1		GNAT family N-acetyltransferase	4	4	1	6	1980				506	506	506	e26b52046ef139bf63509f5b590c18e0_1233	935e3caf510be0c503c97acef35381b2_2817	36ade0437952544bcc39850c777ef069_1301	S_aureus_9_02017
mtnN		5'-methylthioadenosine/S-adenosylhomocysteine nucleosidase	4	4	1	6	1679				686	686	686	e26b52046ef139bf63509f5b590c18e0_3001	935e3caf510be0c503c97acef35381b2_887	36ade0437952544bcc39850c777ef069_3281	S_aureus_9_00203
WP_000392691.1		transcriptional repressor	4	4	1	6	941				449	449	449	e26b52046ef139bf63509f5b590c18e0_2798	935e3caf510be0c503c97acef35381b2_1092	36ade0437952544bcc39850c777ef069_3076	S_aureus_9_00105
ftnA		H-type ferritin FtnA	4	4	1	6	1505				500	500	500	e26b52046ef139bf63509f5b590c18e0_3744	935e3caf510be0c503c97acef35381b2_167	36ade0437952544bcc39850c777ef069_3998	S_aureus_9_01976
WP_001164085.1		hypothetical protein	4	4	1	6	1984				497	497	497	e26b52046ef139bf63509f5b590c18e0_1225	935e3caf510be0c503c97acef35381b2_2825	36ade0437952544bcc39850c777ef069_1293	S_aureus_9_02021
secA		preprotein translocase subunit SecA	4	4	1	6	1120				2531	2531	2531	e26b52046ef139bf63509f5b590c18e0_1431	935e3caf510be0c503c97acef35381b2_2617	36ade0437952544bcc39850c777ef069_1501	S_aureus_9_01292
acpS		holo-ACP synthase	4	4	1	6	2919				359	359	359	e26b52046ef139bf63509f5b590c18e0_4079	935e3caf510be0c503c97acef35381b2_5546	36ade0437952544bcc39850c777ef069_4271	S_aureus_9_01417
WP_000354114.1		YggT family protein	4	4	1	6	460				290	290	290	e26b52046ef139bf63509f5b590c18e0_2150	935e3caf510be0c503c97acef35381b2_1867	36ade0437952544bcc39850c777ef069_2402	S_aureus_9_00707
rpsU		30S ribosomal protein S21	4	4	1	6	1656				176	176	176	e26b52046ef139bf63509f5b590c18e0_2955	935e3caf510be0c503c97acef35381b2_935	36ade0437952544bcc39850c777ef069_3235	S_aureus_9_00180
WP_001059079.1		cold-shock protein	4	4	1	6	2378				200	200	200	e26b52046ef139bf63509f5b590c18e0_5411	935e3caf510be0c503c97acef35381b2_4237	36ade0437952544bcc39850c777ef069_5594	S_aureus_9_01362
WP_000005886.1		hypothetical protein	4	4	1	6	1185				218	218	218	e26b52046ef139bf63509f5b590c18e0_1525	935e3caf510be0c503c97acef35381b2_2495	36ade0437952544bcc39850c777ef069_1639	S_aureus_9_00861
WP_000724887.1		EMYY motif lipoprotein	4	4	1	6	1107				878	878	878	e26b52046ef139bf63509f5b590c18e0_1405	935e3caf510be0c503c97acef35381b2_2643	36ade0437952544bcc39850c777ef069_1475	S_aureus_9_01279
rpsO		30S ribosomal protein S15	4	4	1	6	296				269	269	269	e26b52046ef139bf63509f5b590c18e0_2320	935e3caf510be0c503c97acef35381b2_1697	36ade0437952544bcc39850c777ef069_2570	S_aureus_9_00627
WP_000182842.1		thioredoxin family protein	4	4	1	6	1465				563	563	563	e26b52046ef139bf63509f5b590c18e0_3826	935e3caf510be0c503c97acef35381b2_85	36ade0437952544bcc39850c777ef069_4080	S_aureus_9_02553
WP_000819532.1		diacylglycerol kinase	4	4	1	6	1650				344	344	344	e26b52046ef139bf63509f5b590c18e0_2943	935e3caf510be0c503c97acef35381b2_947	36ade0437952544bcc39850c777ef069_3223	S_aureus_9_00174
WP_000808968.1		type B 50S ribosomal protein L31	4	4	1	6	2869				254	254	254	e26b52046ef139bf63509f5b590c18e0_4178	935e3caf510be0c503c97acef35381b2_5447	36ade0437952544bcc39850c777ef069_4370	S_aureus_9_01464
WP_000752909.1		CsbD family protein	4	4	1	6	1704				182	182	182	e26b52046ef139bf63509f5b590c18e0_3049	935e3caf510be0c503c97acef35381b2_837	36ade0437952544bcc39850c777ef069_3329	S_aureus_9_00227
WP_000068176.1		alpha-ketoacid dehydrogenase subunit beta	4	4	1	6	662				977	977	977	e26b52046ef139bf63509f5b590c18e0_1951	935e3caf510be0c503c97acef35381b2_2066	36ade0437952544bcc39850c777ef069_2203	S_aureus_9_01057
WP_001151997.1		ferredoxin	4	4	1	6	1390				248	248	248	e26b52046ef139bf63509f5b590c18e0_2745	935e3caf510be0c503c97acef35381b2_1253	36ade0437952544bcc39850c777ef069_3043	S_aureus_9_00090
WP_000384171.1		hypothetical protein	4	4	1	6	1854				224	224	224	e26b52046ef139bf63509f5b590c18e0_3360	935e3caf510be0c503c97acef35381b2_531	36ade0437952544bcc39850c777ef069_3634	S_aureus_9_02433
WP_000989091.1		iron chelate uptake ABC transporter family permease subunit	4	4	1	6	852				968	968	968	e26b52046ef139bf63509f5b590c18e0_4316	935e3caf510be0c503c97acef35381b2_5314	36ade0437952544bcc39850c777ef069_4509	S_aureus_9_02324
sasA		serine-rich repeat glycoprotein adhesin SasA	4	4	1	6	2326				4985	6827	6255	e26b52046ef139bf63509f5b590c18e0_5309	935e3caf510be0c503c97acef35381b2_4331	36ade0437952544bcc39850c777ef069_5492	S_aureus_9_00616
WP_001004401.1		hypothetical protein	4	4	1	6	1186				284	284	284	e26b52046ef139bf63509f5b590c18e0_1527	935e3caf510be0c503c97acef35381b2_2493	36ade0437952544bcc39850c777ef069_1641	S_aureus_9_00860
secG		preprotein translocase subunit SecG	4	4	1	6	1150				233	233	233	e26b52046ef139bf63509f5b590c18e0_1488	935e3caf510be0c503c97acef35381b2_2562	36ade0437952544bcc39850c777ef069_1556	S_aureus_9_00876
WP_000933774.1		ribose-phosphate diphosphokinase	4	4	1	6	2151				965	965	965	e26b52046ef139bf63509f5b590c18e0_858	935e3caf510be0c503c97acef35381b2_3202	36ade0437952544bcc39850c777ef069_918	S_aureus_9_02402
WP_000739224.1		N-acetylglucosaminidase	4	4	1	6	374				776	776	776	e26b52046ef139bf63509f5b590c18e0_4570	935e3caf510be0c503c97acef35381b2_5060	36ade0437952544bcc39850c777ef069_4767	S_aureus_9_01719
WP_001125208.1		2,3-diphosphoglycerate-dependent phosphoglycerate mutase	4	4	1	6	2964				686	686	686	e26b52046ef139bf63509f5b590c18e0_4797	935e3caf510be0c503c97acef35381b2_4831	36ade0437952544bcc39850c777ef069_4992	S_aureus_9_00384
manA		mannose-6-phosphate isomerase, class I	4	4	1	6	3066				938	938	938	e26b52046ef139bf63509f5b590c18e0_5285	935e3caf510be0c503c97acef35381b2_4355	36ade0437952544bcc39850c777ef069_5468	S_aureus_9_00604
WP_000277602.1		universal stress protein	4	4	1	6	1779				413	413	413	e26b52046ef139bf63509f5b590c18e0_3207	935e3caf510be0c503c97acef35381b2_680	36ade0437952544bcc39850c777ef069_3487	S_aureus_9_00295
WP_000889252.1		metal ABC transporter permease	4	4	1	6	2005				836	836	836	e26b52046ef139bf63509f5b590c18e0_1183	935e3caf510be0c503c97acef35381b2_2867	36ade0437952544bcc39850c777ef069_1251	S_aureus_9_02041
WP_000904065.1		hypothetical protein	4	4	1	6	391				530	530	530	e26b52046ef139bf63509f5b590c18e0_4604	935e3caf510be0c503c97acef35381b2_5026	36ade0437952544bcc39850c777ef069_4801	S_aureus_9_01735
WP_000353634.1		PTS fructose transporter subunit IIC	4	4	1	6	3184				1043	1043	1043	e26b52046ef139bf63509f5b590c18e0_5047	935e3caf510be0c503c97acef35381b2_4595	36ade0437952544bcc39850c777ef069_5228	S_aureus_9_00494
WP_001242102.1		hypothetical protein	4	4	1	6	2954				347	347	347	e26b52046ef139bf63509f5b590c18e0_1756	935e3caf510be0c503c97acef35381b2_2262	36ade0437952544bcc39850c777ef069_2008	S_aureus_9_02091
WP_000273981.1		DUF86 domain-containing protein	4	4	1	6	1040				434	434	434	e26b52046ef139bf63509f5b590c18e0_1604	935e3caf510be0c503c97acef35381b2_2414	36ade0437952544bcc39850c777ef069_1850	S_aureus_9_00792
WP_000565255.1		urease accessory protein UreF	4	4	1	6	359				689	689	689	e26b52046ef139bf63509f5b590c18e0_4540	935e3caf510be0c503c97acef35381b2_5090	36ade0437952544bcc39850c777ef069_4737	S_aureus_9_01874
WP_000018608.1		cell division protein SepF	4	4	1	6	459				563	563	563	e26b52046ef139bf63509f5b590c18e0_2148	935e3caf510be0c503c97acef35381b2_1869	36ade0437952544bcc39850c777ef069_2400	S_aureus_9_00708
WP_000215388.1		WecB/TagA/CpsF family glycosyltransferase	4	4	1	6	2001				764	764	764	e26b52046ef139bf63509f5b590c18e0_1191	935e3caf510be0c503c97acef35381b2_2859	36ade0437952544bcc39850c777ef069_1259	S_aureus_9_02037
WP_000697134.1		DUF896 domain-containing protein	4	4	1	6	3141				230	230	230	e26b52046ef139bf63509f5b590c18e0_5133	935e3caf510be0c503c97acef35381b2_4509	36ade0437952544bcc39850c777ef069_5314	S_aureus_9_00536
WP_000159837.1		hypothetical protein	4	4	1	6	3125				275	275	275	e26b52046ef139bf63509f5b590c18e0_5165	935e3caf510be0c503c97acef35381b2_4477	36ade0437952544bcc39850c777ef069_5346	S_aureus_9_00552
WP_000185863.1		polysaccharide biosynthesis tyrosine autokinase	4	4	1	6	2335				692	692	692	e26b52046ef139bf63509f5b590c18e0_5327	935e3caf510be0c503c97acef35381b2_4313	36ade0437952544bcc39850c777ef069_5510	S_aureus_9_01319
rplW		50S ribosomal protein L23	4	4	1	6	784				275	275	275	e26b52046ef139bf63509f5b590c18e0_4450	935e3caf510be0c503c97acef35381b2_5180	36ade0437952544bcc39850c777ef069_4645	S_aureus_9_01832
nrdF		class 1b ribonucleoside-diphosphate reductase subunit beta	4	4	1	6	1098				971	971	971	e26b52046ef139bf63509f5b590c18e0_1387	935e3caf510be0c503c97acef35381b2_2661	36ade0437952544bcc39850c777ef069_1457	S_aureus_9_01271
rpoD		RNA polymerase sigma factor RpoD	4	4	1	6	1642				1106	1106	1106	e26b52046ef139bf63509f5b590c18e0_2927	935e3caf510be0c503c97acef35381b2_963	36ade0437952544bcc39850c777ef069_3207	S_aureus_9_00166
ald		alanine dehydrogenase	4	4	1	6	1783				1118	1118	1118	e26b52046ef139bf63509f5b590c18e0_3215	935e3caf510be0c503c97acef35381b2_672	36ade0437952544bcc39850c777ef069_3495	S_aureus_9_00298
WP_000902805.1		YisL family protein	4	4	1	6	998				389	389	389	e26b52046ef139bf63509f5b590c18e0_1688	935e3caf510be0c503c97acef35381b2_2330	36ade0437952544bcc39850c777ef069_1936	S_aureus_9_00751
WP_001177186.1		hypothetical protein	4	4	1	6	3183				203	203	203	e26b52046ef139bf63509f5b590c18e0_5049	935e3caf510be0c503c97acef35381b2_4593	36ade0437952544bcc39850c777ef069_5230	S_aureus_9_00495
WP_000687412.1		LysR family transcriptional regulator	4	4	1	6	1964				866	866	866	e26b52046ef139bf63509f5b590c18e0_1265	935e3caf510be0c503c97acef35381b2_2785	36ade0437952544bcc39850c777ef069_1333	S_aureus_9_01212
panB		3-methyl-2-oxobutanoate hydroxymethyltransferase	4	4	1	6	3118				818	818	818	e26b52046ef139bf63509f5b590c18e0_5179	935e3caf510be0c503c97acef35381b2_4459	36ade0437952544bcc39850c777ef069_5362	S_aureus_9_00560
WP_000214898.1		YkvS family protein	4	4	1	6	675				176	176	176	e26b52046ef139bf63509f5b590c18e0_1808	935e3caf510be0c503c97acef35381b2_2209	36ade0437952544bcc39850c777ef069_2060	S_aureus_9_02116
WP_000285450.1		HAD family hydrolase	4	4	1	6	389				635	635	635	e26b52046ef139bf63509f5b590c18e0_4600	935e3caf510be0c503c97acef35381b2_5030	36ade0437952544bcc39850c777ef069_4797	S_aureus_9_01733
pstC		phosphate ABC transporter permease subunit PstC	4	4	1	6	170				926	926	926	e26b52046ef139bf63509f5b590c18e0_2546	935e3caf510be0c503c97acef35381b2_1453	36ade0437952544bcc39850c777ef069_2848	S_aureus_9_01944
WP_001077602.1		mechanosensitive ion channel family protein	4	4	1	6	2755				881	881	881	e26b52046ef139bf63509f5b590c18e0_602	935e3caf510be0c503c97acef35381b2_3470	36ade0437952544bcc39850c777ef069_646	S_aureus_9_01548
trmL		tRNA (uridine(34)/cytosine(34)/5-carboxymethylaminomethyluridine(34)-2'-O)-methyltransferase TrmL	4	4	1	6	2860				470	470	470	e26b52046ef139bf63509f5b590c18e0_3535	935e3caf510be0c503c97acef35381b2_338	36ade0437952544bcc39850c777ef069_3825	S_aureus_9_02255
rho		transcription termination factor Rho	4	4	1	6	2868				1316	1316	1316	e26b52046ef139bf63509f5b590c18e0_4180	935e3caf510be0c503c97acef35381b2_5445	36ade0437952544bcc39850c777ef069_4372	S_aureus_9_01465
WP_000531320.1		putative DNA-binding protein	4	4	1	6	505				332	332	332	e26b52046ef139bf63509f5b590c18e0_2242	935e3caf510be0c503c97acef35381b2_1775	36ade0437952544bcc39850c777ef069_2494	S_aureus_9_00662
ampR		LysR family transcriptional regulator	4	4	1	6	992				869	869	869	e26b52046ef139bf63509f5b590c18e0_1700	935e3caf510be0c503c97acef35381b2_2318	36ade0437952544bcc39850c777ef069_1948	S_aureus_9_00745
WP_000882123.1		DUF443 domain-containing protein	4	4	1	6	2039				635	635	635	e26b52046ef139bf63509f5b590c18e0_1115	935e3caf510be0c503c97acef35381b2_2935	36ade0437952544bcc39850c777ef069_1183	S_aureus_9_02535
WP_000752917.1		CsbD family protein	4	4	1	6	1205				194	194	194	e26b52046ef139bf63509f5b590c18e0_1568	935e3caf510be0c503c97acef35381b2_2448	36ade0437952544bcc39850c777ef069_1684	S_aureus_9_00838
coaE		dephospho-CoA kinase	4	4	1	6	1762				623	623	623	e26b52046ef139bf63509f5b590c18e0_3171	935e3caf510be0c503c97acef35381b2_714	36ade0437952544bcc39850c777ef069_3451	S_aureus_9_00278
rpmA		50S ribosomal protein L27	4	4	1	6	1725				284	284	284	e26b52046ef139bf63509f5b590c18e0_3092	935e3caf510be0c503c97acef35381b2_794	36ade0437952544bcc39850c777ef069_3372	S_aureus_9_00246
hslU		ATP-dependent protease ATPase subunit HslU	4	4	1	6	317				1403	1403	1403	e26b52046ef139bf63509f5b590c18e0_2278	935e3caf510be0c503c97acef35381b2_1739	36ade0437952544bcc39850c777ef069_2528	S_aureus_9_00646
rplP		50S ribosomal protein L16	4	4	1	6	789				434	434	434	e26b52046ef139bf63509f5b590c18e0_4440	935e3caf510be0c503c97acef35381b2_5190	36ade0437952544bcc39850c777ef069_4635	S_aureus_9_01827
rpsB		30S ribosomal protein S2	4	4	1	6	314				767	767	767	e26b52046ef139bf63509f5b590c18e0_2284	935e3caf510be0c503c97acef35381b2_1733	36ade0437952544bcc39850c777ef069_2534	S_aureus_9_00644
WP_000266096.1		alpha/beta hydrolase	4	4	1	6	1844				827	827	827	e26b52046ef139bf63509f5b590c18e0_3335	935e3caf510be0c503c97acef35381b2_554	36ade0437952544bcc39850c777ef069_3611	S_aureus_9_02422
WP_001289711.1		N-acetyltransferase	4	4	1	6	446				440	440	440	e26b52046ef139bf63509f5b590c18e0_2122	935e3caf510be0c503c97acef35381b2_1895	36ade0437952544bcc39850c777ef069_2374	S_aureus_9_00721
cdd		cytidine deaminase	4	4	1	6	1649				404	404	404	e26b52046ef139bf63509f5b590c18e0_2941	935e3caf510be0c503c97acef35381b2_949	36ade0437952544bcc39850c777ef069_3221	S_aureus_9_00173
WP_000959292.1		competence protein CoiA	4	4	1	6	2935				986	986	986	e26b52046ef139bf63509f5b590c18e0_1746	935e3caf510be0c503c97acef35381b2_2272	36ade0437952544bcc39850c777ef069_1994	S_aureus_9_02086
WP_000161314.1		ROK family glucokinase	4	4	1	6	1628				986	986	986	e26b52046ef139bf63509f5b590c18e0_2899	935e3caf510be0c503c97acef35381b2_991	36ade0437952544bcc39850c777ef069_3179	S_aureus_9_00153
WP_001549802.1		hypothetical protein	4	4	1	6	3190				170	170	170	e26b52046ef139bf63509f5b590c18e0_5039	935e3caf510be0c503c97acef35381b2_4603	36ade0437952544bcc39850c777ef069_5220	S_aureus_9_00491
WP_000882168.1		DUF443 family protein	4	4	1	6	2047				617	617	617	e26b52046ef139bf63509f5b590c18e0_1099	935e3caf510be0c503c97acef35381b2_2951	36ade0437952544bcc39850c777ef069_1167	S_aureus_9_02210
WP_000196911.1		ACT domain-containing protein	4	4	1	6	587				254	254	254	e26b52046ef139bf63509f5b590c18e0_4032	935e3caf510be0c503c97acef35381b2_5593	36ade0437952544bcc39850c777ef069_4220	S_aureus_9_01708
WP_000491755.1		DUF47 domain-containing protein	4	4	1	6	1974				617	617	617	e26b52046ef139bf63509f5b590c18e0_1245	935e3caf510be0c503c97acef35381b2_2805	36ade0437952544bcc39850c777ef069_1313	S_aureus_9_02011
WP_000342266.1		O-methyltransferase	4	4	1	6	1693				638	638	638	e26b52046ef139bf63509f5b590c18e0_3027	935e3caf510be0c503c97acef35381b2_859	36ade0437952544bcc39850c777ef069_3307	S_aureus_9_00216
rplS		50S ribosomal protein L19	4	4	1	6	510				350	350	350	e26b52046ef139bf63509f5b590c18e0_2252	935e3caf510be0c503c97acef35381b2_1765	36ade0437952544bcc39850c777ef069_2504	S_aureus_9_00657
WP_001030080.1		glycine--tRNA ligase	4	4	1	6	1646				1391	1391	1391	e26b52046ef139bf63509f5b590c18e0_2935	935e3caf510be0c503c97acef35381b2_955	36ade0437952544bcc39850c777ef069_3215	S_aureus_9_00170
WP_000282386.1		RicAFT regulatory complex protein RicA family protein	4	4	1	6	276				365	365	365	e26b52046ef139bf63509f5b590c18e0_2360	935e3caf510be0c503c97acef35381b2_1657	36ade0437952544bcc39850c777ef069_2610	S_aureus_9_02343
spoVG		septation regulator SpoVG	4	4	1	6	2153				302	302	302	e26b52046ef139bf63509f5b590c18e0_852	935e3caf510be0c503c97acef35381b2_3208	36ade0437952544bcc39850c777ef069_912	S_aureus_9_02404
WP_072353877.1		trypsin-like peptidase domain-containing protein	4	4	1	6	669				2309	2324	2320	e26b52046ef139bf63509f5b590c18e0_1790	935e3caf510be0c503c97acef35381b2_2227	36ade0437952544bcc39850c777ef069_2042	S_aureus_9_02108
rpsQ		30S ribosomal protein S17	4	4	1	6	791				263	263	263	e26b52046ef139bf63509f5b590c18e0_4436	935e3caf510be0c503c97acef35381b2_5194	36ade0437952544bcc39850c777ef069_4631	S_aureus_9_01825
WP_001229911.1		ABC transporter ATP-binding protein	4	4	1	6	441				665	665	665	e26b52046ef139bf63509f5b590c18e0_4683	935e3caf510be0c503c97acef35381b2_4951	36ade0437952544bcc39850c777ef069_4876	S_aureus_9_01770
WP_001033971.1		DUF1700 domain-containing protein	4	4	1	6	1467				557	557	557	e26b52046ef139bf63509f5b590c18e0_3822	935e3caf510be0c503c97acef35381b2_89	36ade0437952544bcc39850c777ef069_4076	S_aureus_9_02555
nadE		ammonia-dependent NAD(+) synthetase	4	4	1	6	1483				821	821	821	e26b52046ef139bf63509f5b590c18e0_3788	935e3caf510be0c503c97acef35381b2_123	36ade0437952544bcc39850c777ef069_4042	S_aureus_9_01956
WP_000376235.1		MarR family transcriptional regulator	4	4	1	6	3200				434	434	434	e26b52046ef139bf63509f5b590c18e0_5019	935e3caf510be0c503c97acef35381b2_4623	36ade0437952544bcc39850c777ef069_5200	S_aureus_9_00481
csoR		copper-sensing transcriptional repressor CsoR	4	4	1	6	2903				293	293	293	e26b52046ef139bf63509f5b590c18e0_4111	935e3caf510be0c503c97acef35381b2_5514	36ade0437952544bcc39850c777ef069_4303	S_aureus_9_01432
rpsH		30S ribosomal protein S8	4	4	1	6	796				398	398	398	e26b52046ef139bf63509f5b590c18e0_4426	935e3caf510be0c503c97acef35381b2_5204	36ade0437952544bcc39850c777ef069_4621	S_aureus_9_01820
rpmG		50S ribosomal protein L33	4	4	1	6	1632				149	149	149	e26b52046ef139bf63509f5b590c18e0_2907	935e3caf510be0c503c97acef35381b2_983	36ade0437952544bcc39850c777ef069_3187	S_aureus_9_00156
WP_000164421.1		S-ribosylhomocysteine lyase	4	4	1	6	73				470	470	470	e26b52046ef139bf63509f5b590c18e0_4206	935e3caf510be0c503c97acef35381b2_5419	36ade0437952544bcc39850c777ef069_4398	S_aureus_9_01478
phnC		phosphonate ABC transporter ATP-binding protein	4	4	1	6	2549				773	773	773	e26b52046ef139bf63509f5b590c18e0_179	935e3caf510be0c503c97acef35381b2_3927	36ade0437952544bcc39850c777ef069_201	S_aureus_9_00945
lacB		galactose-6-phosphate isomerase subunit LacB	4	4	1	6	832				515	515	515	e26b52046ef139bf63509f5b590c18e0_4358	935e3caf510be0c503c97acef35381b2_5274	36ade0437952544bcc39850c777ef069_4549	S_aureus_9_02305
WP_001030125.1		YafY family transcriptional regulator	4	4	1	6	381				692	692	692	e26b52046ef139bf63509f5b590c18e0_4582	935e3caf510be0c503c97acef35381b2_5048	36ade0437952544bcc39850c777ef069_4779	S_aureus_9_01725
WP_000450555.1		heptaprenyl diphosphate synthase component 1	4	4	1	6	1376				572	572	572	e26b52046ef139bf63509f5b590c18e0_2717	935e3caf510be0c503c97acef35381b2_1277	36ade0437952544bcc39850c777ef069_3019	S_aureus_9_00079
rpmJ		50S ribosomal protein L36	4	4	1	6	805				113	113	113	e26b52046ef139bf63509f5b590c18e0_4408	935e3caf510be0c503c97acef35381b2_5222	36ade0437952544bcc39850c777ef069_4603	S_aureus_9_01811
typA		translational GTPase TypA	4	4	1	6	647				1847	1847	1847	e26b52046ef139bf63509f5b590c18e0_1981	935e3caf510be0c503c97acef35381b2_2036	36ade0437952544bcc39850c777ef069_2233	S_aureus_9_01042
WP_001192075.1		multidrug effflux MFS transporter	4	4	1	6	2983				1211	1211	1211	e26b52046ef139bf63509f5b590c18e0_4837	935e3caf510be0c503c97acef35381b2_4791	36ade0437952544bcc39850c777ef069_5032	S_aureus_9_00401
WP_000358498.1		hypothetical protein	4	4	1	6	1954				683	683	683	e26b52046ef139bf63509f5b590c18e0_1285	935e3caf510be0c503c97acef35381b2_2765	36ade0437952544bcc39850c777ef069_1353	S_aureus_9_01222
sucC		ADP-forming succinate--CoA ligase subunit beta	4	4	1	6	324				1166	1166	1166	e26b52046ef139bf63509f5b590c18e0_2260	935e3caf510be0c503c97acef35381b2_1757	36ade0437952544bcc39850c777ef069_2514	S_aureus_9_00653
WP_000902175.1		DUF6501 family protein	4	4	1	6	148				203	203	203	e26b52046ef139bf63509f5b590c18e0_2592	935e3caf510be0c503c97acef35381b2_1406	36ade0437952544bcc39850c777ef069_2892	S_aureus_9_00020
WP_000522384.1		nitroreductase family protein	4	4	1	6	561				626	626	626	e26b52046ef139bf63509f5b590c18e0_3982	935e3caf510be0c503c97acef35381b2_5643	36ade0437952544bcc39850c777ef069_4168	S_aureus_9_01686
WP_000569884.1		GNAT family N-acetyltransferase	4	4	1	6	1193				494	494	494	e26b52046ef139bf63509f5b590c18e0_1543	935e3caf510be0c503c97acef35381b2_2477	36ade0437952544bcc39850c777ef069_1657	S_aureus_9_00852
WP_000238542.1		MarR family transcriptional regulator	4	4	1	6	426				455	455	455	e26b52046ef139bf63509f5b590c18e0_4677	935e3caf510be0c503c97acef35381b2_4955	36ade0437952544bcc39850c777ef069_4872	S_aureus_9_01768
WP_000159865.1		exodeoxyribonuclease VII small subunit	4	4	1	6	1603				230	230	230	e26b52046ef139bf63509f5b590c18e0_2848	935e3caf510be0c503c97acef35381b2_1042	36ade0437952544bcc39850c777ef069_3128	S_aureus_9_00129
grpE		nucleotide exchange factor GrpE	4	4	1	6	1662				626	626	626	e26b52046ef139bf63509f5b590c18e0_2967	935e3caf510be0c503c97acef35381b2_923	36ade0437952544bcc39850c777ef069_3247	S_aureus_9_00186
WP_000848304.1		U32 family peptidase	4	4	1	6	1691				1268	1268	1268	e26b52046ef139bf63509f5b590c18e0_3023	935e3caf510be0c503c97acef35381b2_863	36ade0437952544bcc39850c777ef069_3303	S_aureus_9_00214
WP_000604727.1		hypothetical protein	4	4	1	6	3084				200	200	200	e26b52046ef139bf63509f5b590c18e0_5249	935e3caf510be0c503c97acef35381b2_4391	36ade0437952544bcc39850c777ef069_5432	S_aureus_9_00587
secY		preprotein translocase subunit SecY	4	4	1	6	802				1292	1292	1292	e26b52046ef139bf63509f5b590c18e0_4414	935e3caf510be0c503c97acef35381b2_5216	36ade0437952544bcc39850c777ef069_4609	S_aureus_9_01814
pcrA		DNA helicase PcrA	4	4	1	6	1491				2192	2192	2192	e26b52046ef139bf63509f5b590c18e0_3772	935e3caf510be0c503c97acef35381b2_139	36ade0437952544bcc39850c777ef069_4026	S_aureus_9_01964
WP_000651160.1		alanine:cation symporter family protein	4	4	1	6	201				1460	1460	1460	e26b52046ef139bf63509f5b590c18e0_2482	935e3caf510be0c503c97acef35381b2_1519	36ade0437952544bcc39850c777ef069_2784	S_aureus_9_01914
ychF		redox-regulated ATPase YchF	4	4	1	6	2757				1097	1097	1097	e26b52046ef139bf63509f5b590c18e0_606	935e3caf510be0c503c97acef35381b2_3466	36ade0437952544bcc39850c777ef069_650	S_aureus_9_01546
WP_001795266.1		hypothetical protein	4	4	1	6	684				245	290	278	e26b52046ef139bf63509f5b590c18e0_1824	935e3caf510be0c503c97acef35381b2_2193	36ade0437952544bcc39850c777ef069_2076	S_aureus_9_02576
WP_001117066.1		DivIVA domain-containing protein	4	4	1	6	462				617	617	617	e26b52046ef139bf63509f5b590c18e0_2154	935e3caf510be0c503c97acef35381b2_1863	36ade0437952544bcc39850c777ef069_2406	S_aureus_9_00705
WP_000152582.1		DUF456 domain-containing protein	4	4	1	6	1962				488	488	488	e26b52046ef139bf63509f5b590c18e0_1269	935e3caf510be0c503c97acef35381b2_2781	36ade0437952544bcc39850c777ef069_1337	S_aureus_9_01214
queE		7-carboxy-7-deazaguanine synthase QueE	4	4	1	6	1926				713	713	713	e26b52046ef139bf63509f5b590c18e0_1341	935e3caf510be0c503c97acef35381b2_2709	36ade0437952544bcc39850c777ef069_1409	S_aureus_9_01250
WP_000031108.1		hypothetical protein	4	4	1	6	2858				152	152	152	e26b52046ef139bf63509f5b590c18e0_3531	935e3caf510be0c503c97acef35381b2_342	36ade0437952544bcc39850c777ef069_3821	S_aureus_9_02253
WP_000160435.1		CBS domain-containing protein	4	4	1	6	1778				1298	1298	1298	e26b52046ef139bf63509f5b590c18e0_3205	935e3caf510be0c503c97acef35381b2_682	36ade0437952544bcc39850c777ef069_3485	S_aureus_9_00294
WP_000431226.1		O-antigen ligase family protein	4	4	1	6	2538				1238	1238	1238	e26b52046ef139bf63509f5b590c18e0_155	935e3caf510be0c503c97acef35381b2_3951	36ade0437952544bcc39850c777ef069_177	S_aureus_9_00956
rplF		50S ribosomal protein L6	4	4	1	6	797				536	536	536	e26b52046ef139bf63509f5b590c18e0_4424	935e3caf510be0c503c97acef35381b2_5206	36ade0437952544bcc39850c777ef069_4619	S_aureus_9_01819
yihA		ribosome biogenesis GTP-binding protein YihA/YsxC	4	4	1	6	1746				590	590	590	e26b52046ef139bf63509f5b590c18e0_3138	935e3caf510be0c503c97acef35381b2_748	36ade0437952544bcc39850c777ef069_3418	S_aureus_9_00264
sarR		HTH-type transcriptional regulator SarR	4	4	1	6	362				347	347	347	e26b52046ef139bf63509f5b590c18e0_4546	935e3caf510be0c503c97acef35381b2_5084	36ade0437952544bcc39850c777ef069_4743	S_aureus_9_01877
WP_000390575.1		metal-sulfur cluster assembly factor	4	4	1	6	995				308	308	308	e26b52046ef139bf63509f5b590c18e0_1694	935e3caf510be0c503c97acef35381b2_2324	36ade0437952544bcc39850c777ef069_1942	S_aureus_9_00748
WP_000149686.1		cysteine hydrolase	4	4	1	6	1477				560	560	560	e26b52046ef139bf63509f5b590c18e0_3802	935e3caf510be0c503c97acef35381b2_109	36ade0437952544bcc39850c777ef069_4056	S_aureus_9_01950
bcp		thioredoxin-dependent thiol peroxidase	4	4	1	6	1535				455	455	455	e26b52046ef139bf63509f5b590c18e0_3646	935e3caf510be0c503c97acef35381b2_231	36ade0437952544bcc39850c777ef069_3934	S_aureus_9_02006
WP_000020853.1		YlxQ family RNA-binding protein	4	4	1	6	301				317	317	317	e26b52046ef139bf63509f5b590c18e0_2310	935e3caf510be0c503c97acef35381b2_1707	36ade0437952544bcc39850c777ef069_2560	S_aureus_9_00632
gatC		Asp-tRNA(Asn)/Glu-tRNA(Gln) amidotransferase subunit GatC	4	4	1	6	1495				302	302	302	e26b52046ef139bf63509f5b590c18e0_3764	935e3caf510be0c503c97acef35381b2_147	36ade0437952544bcc39850c777ef069_4018	S_aureus_9_01968
rpsP		30S ribosomal protein S16	4	4	1	6	507				275	275	275	e26b52046ef139bf63509f5b590c18e0_2246	935e3caf510be0c503c97acef35381b2_1771	36ade0437952544bcc39850c777ef069_2498	S_aureus_9_00660
WP_000460983.1		GGDEF domain-containing protein	4	4	1	6	1113				1070	1070	1070	e26b52046ef139bf63509f5b590c18e0_1417	935e3caf510be0c503c97acef35381b2_2631	36ade0437952544bcc39850c777ef069_1487	S_aureus_9_01285
WP_000808500.1		molybdenum cofactor biosynthesis protein MoaE	4	4	1	6	759				446	446	446	e26b52046ef139bf63509f5b590c18e0_4500	935e3caf510be0c503c97acef35381b2_5130	36ade0437952544bcc39850c777ef069_4697	S_aureus_9_01854
WP_001231451.1		diacylglycerol kinase	4	4	1	6	1499				947	947	947	e26b52046ef139bf63509f5b590c18e0_3756	935e3caf510be0c503c97acef35381b2_155	36ade0437952544bcc39850c777ef069_4010	S_aureus_9_01971
WP_000473705.1		isoprenyl transferase	4	4	1	6	309				770	770	770	e26b52046ef139bf63509f5b590c18e0_2294	935e3caf510be0c503c97acef35381b2_1723	36ade0437952544bcc39850c777ef069_2544	S_aureus_9_00640
mnhB1		Na+/H+ antiporter Mnh1 subunit B	4	4	1	6	1016				428	428	428	e26b52046ef139bf63509f5b590c18e0_1652	935e3caf510be0c503c97acef35381b2_2366	36ade0437952544bcc39850c777ef069_1898	S_aureus_9_00769
WP_000620949.1		GNAT family N-acetyltransferase	4	4	1	6	690				551	551	551	e26b52046ef139bf63509f5b590c18e0_1838	935e3caf510be0c503c97acef35381b2_2179	36ade0437952544bcc39850c777ef069_2086	S_aureus_9_01109
WP_001059690.1		hypothetical protein	4	4	1	6	1189				260	260	260	e26b52046ef139bf63509f5b590c18e0_1533	935e3caf510be0c503c97acef35381b2_2487	36ade0437952544bcc39850c777ef069_1647	S_aureus_9_00857
WP_000971980.1		hypothetical protein	4	4	1	6	388				191	191	191	e26b52046ef139bf63509f5b590c18e0_4598	935e3caf510be0c503c97acef35381b2_5032	36ade0437952544bcc39850c777ef069_4795	S_aureus_9_01732
nusB		transcription antitermination factor NusB	4	4	1	6	1605				389	389	389	e26b52046ef139bf63509f5b590c18e0_2852	935e3caf510be0c503c97acef35381b2_1038	36ade0437952544bcc39850c777ef069_3132	S_aureus_9_00131
purR		pur operon repressor	4	4	1	6	2155				824	824	824	e26b52046ef139bf63509f5b590c18e0_848	935e3caf510be0c503c97acef35381b2_3212	36ade0437952544bcc39850c777ef069_908	S_aureus_9_02406
WP_000899890.1		threonine/serine exporter family protein	4	4	1	6	1111				494	494	494	e26b52046ef139bf63509f5b590c18e0_1413	935e3caf510be0c503c97acef35381b2_2635	36ade0437952544bcc39850c777ef069_1483	S_aureus_9_01283
WP_000697334.1		low molecular weight protein arginine phosphatase	4	4	1	6	2874				419	419	419	e26b52046ef139bf63509f5b590c18e0_4168	935e3caf510be0c503c97acef35381b2_5457	36ade0437952544bcc39850c777ef069_4360	S_aureus_9_01459
WP_001124511.1		CoA-disulfide reductase	4	4	1	6	997				1316	1316	1316	e26b52046ef139bf63509f5b590c18e0_1690	935e3caf510be0c503c97acef35381b2_2328	36ade0437952544bcc39850c777ef069_1938	S_aureus_9_00750
rpsT		30S ribosomal protein S20	4	4	1	6	1666				251	251	251	e26b52046ef139bf63509f5b590c18e0_2975	935e3caf510be0c503c97acef35381b2_913	36ade0437952544bcc39850c777ef069_3255	S_aureus_9_00190
WP_000368687.1		hypothetical protein	4	4	1	6	1191				236	236	236	e26b52046ef139bf63509f5b590c18e0_1537	935e3caf510be0c503c97acef35381b2_2483	36ade0437952544bcc39850c777ef069_1651	S_aureus_9_00855
WP_000584765.1		ABC transporter permease	4	4	1	6	3019				869	869	869	e26b52046ef139bf63509f5b590c18e0_4901	935e3caf510be0c503c97acef35381b2_4727	36ade0437952544bcc39850c777ef069_5096	S_aureus_9_00431
WP_223197981.1		isochorismate synthase MenF	4	4	1	6	693				1322	1361	1334	e26b52046ef139bf63509f5b590c18e0_1844	935e3caf510be0c503c97acef35381b2_2173	36ade0437952544bcc39850c777ef069_2092	S_aureus_9_01107
WP_000547905.1		thiamine diphosphokinase	4	4	1	6	492				641	641	641	e26b52046ef139bf63509f5b590c18e0_2216	935e3caf510be0c503c97acef35381b2_1801	36ade0437952544bcc39850c777ef069_2468	S_aureus_9_00675
hemE		uroporphyrinogen decarboxylase	4	4	1	6	2837				1037	1037	1037	e26b52046ef139bf63509f5b590c18e0_3489	935e3caf510be0c503c97acef35381b2_384	36ade0437952544bcc39850c777ef069_3779	S_aureus_9_02234
WP_001224379.1		hypothetical protein	4	4	1	6	3036				191	191	191	e26b52046ef139bf63509f5b590c18e0_4933	935e3caf510be0c503c97acef35381b2_4693	36ade0437952544bcc39850c777ef069_5124	S_aureus_9_00445
rplX		50S ribosomal protein L24	4	4	1	6	793				317	317	317	e26b52046ef139bf63509f5b590c18e0_4432	935e3caf510be0c503c97acef35381b2_5198	36ade0437952544bcc39850c777ef069_4627	S_aureus_9_01823
WP_000287588.1		1-acyl-sn-glycerol-3-phosphate acyltransferase	4	4	1	6	1802				617	617	617	e26b52046ef139bf63509f5b590c18e0_3253	935e3caf510be0c503c97acef35381b2_634	36ade0437952544bcc39850c777ef069_3533	S_aureus_9_00315
WP_001206105.1		aldehyde dehydrogenase family protein	4	4	1	6	2867				1427	1427	1427	e26b52046ef139bf63509f5b590c18e0_4182	935e3caf510be0c503c97acef35381b2_5443	36ade0437952544bcc39850c777ef069_4374	S_aureus_9_01466
WP_001044915.1		tyrosine-type recombinase/integrase	4	4	1	6	2015				560	560	560	e26b52046ef139bf63509f5b590c18e0_1163	935e3caf510be0c503c97acef35381b2_2887	36ade0437952544bcc39850c777ef069_1231	S_aureus_9_02051
sucD		succinate--CoA ligase subunit alpha	4	4	1	6	323				908	908	908	e26b52046ef139bf63509f5b590c18e0_2262	935e3caf510be0c503c97acef35381b2_1755	36ade0437952544bcc39850c777ef069_2516	S_aureus_9_00652
rlmD		23S rRNA (uracil(1939)-C(5))-methyltransferase RlmD	4	4	1	6	1500				1361	1361	1361	e26b52046ef139bf63509f5b590c18e0_3754	935e3caf510be0c503c97acef35381b2_157	36ade0437952544bcc39850c777ef069_4008	S_aureus_9_01972
WP_000603755.1		isoprenylcysteine carboxyl methyltransferase family protein	4	4	1	6	2626				494	494	494	e26b52046ef139bf63509f5b590c18e0_313	935e3caf510be0c503c97acef35381b2_3765	36ade0437952544bcc39850c777ef069_359	S_aureus_9_01133
qoxD		cytochrome aa3 quinol oxidase subunit IV	4	4	1	6	708				278	290	281	e26b52046ef139bf63509f5b590c18e0_1876	935e3caf510be0c503c97acef35381b2_2141	36ade0437952544bcc39850c777ef069_2124	S_aureus_9_01092
adhP		alcohol dehydrogenase AdhP	4	4	1	6	2031				1010	1010	1010	e26b52046ef139bf63509f5b590c18e0_1131	935e3caf510be0c503c97acef35381b2_2919	36ade0437952544bcc39850c777ef069_1199	S_aureus_9_02067
ahpC		peroxiredoxin	4	4	1	6	2776				569	569	569	e26b52046ef139bf63509f5b590c18e0_642	935e3caf510be0c503c97acef35381b2_3430	36ade0437952544bcc39850c777ef069_686	S_aureus_9_01527
WP_000145499.1		DUF4064 domain-containing protein	4	4	1	6	653				1019	1019	1019	e26b52046ef139bf63509f5b590c18e0_1969	935e3caf510be0c503c97acef35381b2_2048	36ade0437952544bcc39850c777ef069_2221	S_aureus_9_01048
WP_000137775.1		U32 family peptidase	4	4	1	6	1692				923	923	923	e26b52046ef139bf63509f5b590c18e0_3025	935e3caf510be0c503c97acef35381b2_861	36ade0437952544bcc39850c777ef069_3305	S_aureus_9_00215
rpmD		50S ribosomal protein L30	4	4	1	6	800				179	179	179	e26b52046ef139bf63509f5b590c18e0_4418	935e3caf510be0c503c97acef35381b2_5212	36ade0437952544bcc39850c777ef069_4613	S_aureus_9_01816
csbB		lipoteichoic acid-specific glycosylation protein CsbB	4	4	1	6	1932				983	983	983	e26b52046ef139bf63509f5b590c18e0_1329	935e3caf510be0c503c97acef35381b2_2721	36ade0437952544bcc39850c777ef069_1397	S_aureus_9_01244
fabZ		3-hydroxyacyl-ACP dehydratase FabZ	4	4	1	6	2892				440	440	440	e26b52046ef139bf63509f5b590c18e0_4134	935e3caf510be0c503c97acef35381b2_5491	36ade0437952544bcc39850c777ef069_4326	S_aureus_9_01443
WP_000183771.1		(S)-acetoin forming diacetyl reductase	4	4	1	6	2534				776	776	776	e26b52046ef139bf63509f5b590c18e0_145	935e3caf510be0c503c97acef35381b2_3961	36ade0437952544bcc39850c777ef069_167	S_aureus_9_00960
pdxS		pyridoxal 5'-phosphate synthase lyase subunit PdxS	4	4	1	6	2131				887	887	887	e26b52046ef139bf63509f5b590c18e0_934	935e3caf510be0c503c97acef35381b2_3114	36ade0437952544bcc39850c777ef069_1006	S_aureus_9_02261
WP_000181322.1		lactonase family protein	4	4	1	6	1473				1028	1028	1028	e26b52046ef139bf63509f5b590c18e0_3810	935e3caf510be0c503c97acef35381b2_101	36ade0437952544bcc39850c777ef069_4064	S_aureus_9_01947
WP_001030738.1		N-acetylneuraminate lyase	4	4	1	6	2709				881	881	881	e26b52046ef139bf63509f5b590c18e0_509	935e3caf510be0c503c97acef35381b2_3563	36ade0437952544bcc39850c777ef069_553	S_aureus_9_01594
rplT		50S ribosomal protein L20	4	4	1	6	1752				356	356	356	e26b52046ef139bf63509f5b590c18e0_3150	935e3caf510be0c503c97acef35381b2_736	36ade0437952544bcc39850c777ef069_3430	S_aureus_9_00269
WP_000828354.1		hypothetical protein	4	4	1	6	2905				137	137	137	e26b52046ef139bf63509f5b590c18e0_4107	935e3caf510be0c503c97acef35381b2_5518	36ade0437952544bcc39850c777ef069_4299	S_aureus_9_01430
rplK		50S ribosomal protein L11	4	4	1	6	2112				422	422	422	e26b52046ef139bf63509f5b590c18e0_972	935e3caf510be0c503c97acef35381b2_3076	36ade0437952544bcc39850c777ef069_1044	S_aureus_9_02279
glpT		glycerol-3-phosphate transporter	4	4	1	6	2731				1358	1358	1358	e26b52046ef139bf63509f5b590c18e0_553	935e3caf510be0c503c97acef35381b2_3519	36ade0437952544bcc39850c777ef069_597	S_aureus_9_01573
WP_001279338.1		trypsin-like peptidase domain-containing protein	4	4	1	6	1803				1274	1274	1274	e26b52046ef139bf63509f5b590c18e0_3255	935e3caf510be0c503c97acef35381b2_632	36ade0437952544bcc39850c777ef069_3535	S_aureus_9_00316
xseA		exodeoxyribonuclease VII large subunit	4	4	1	6	1604				1337	1337	1337	e26b52046ef139bf63509f5b590c18e0_2850	935e3caf510be0c503c97acef35381b2_1040	36ade0437952544bcc39850c777ef069_3130	S_aureus_9_00130
WP_001213992.1		YbaB/EbfC family nucleoid-associated protein	4	4	1	6	2173				317	317	317	e26b52046ef139bf63509f5b590c18e0_803	935e3caf510be0c503c97acef35381b2_3257	36ade0437952544bcc39850c777ef069_863	S_aureus_9_02120
WP_001182436.1		Cof-type HAD-IIB family hydrolase	4	4	1	6	996				824	824	824	e26b52046ef139bf63509f5b590c18e0_1692	935e3caf510be0c503c97acef35381b2_2326	36ade0437952544bcc39850c777ef069_1940	S_aureus_9_00749
WP_000691584.1		GntR family transcriptional regulator	4	4	1	6	1460				380	380	380	e26b52046ef139bf63509f5b590c18e0_3836	935e3caf510be0c503c97acef35381b2_75	36ade0437952544bcc39850c777ef069_4090	S_aureus_9_02530
purN		phosphoribosylglycinamide formyltransferase	4	4	1	6	723				566	566	566	e26b52046ef139bf63509f5b590c18e0_1906	935e3caf510be0c503c97acef35381b2_2111	36ade0437952544bcc39850c777ef069_2154	S_aureus_9_01078
mqo		malate dehydrogenase (quinone)	4	4	1	6	3110				1496	1496	1496	e26b52046ef139bf63509f5b590c18e0_5195	935e3caf510be0c503c97acef35381b2_4443	36ade0437952544bcc39850c777ef069_5378	S_aureus_9_00568
WP_000106185.1		MarR family winged helix-turn-helix transcriptional regulator	4	4	1	6	3081				455	455	455	e26b52046ef139bf63509f5b590c18e0_5255	935e3caf510be0c503c97acef35381b2_4385	36ade0437952544bcc39850c777ef069_5438	S_aureus_9_00590
WP_000684567.1		NAD/NADP-dependent octopine/nopaline dehydrogenase family protein	4	4	1	6	369				1082	1082	1082	e26b52046ef139bf63509f5b590c18e0_4560	935e3caf510be0c503c97acef35381b2_5070	36ade0437952544bcc39850c777ef069_4757	S_aureus_9_01883
WP_001190841.1		response regulator transcription factor	4	4	1	6	2910				695	695	695	e26b52046ef139bf63509f5b590c18e0_4097	935e3caf510be0c503c97acef35381b2_5528	36ade0437952544bcc39850c777ef069_4289	S_aureus_9_01425
gatB		Asp-tRNA(Asn)/Glu-tRNA(Gln) amidotransferase subunit GatB	4	4	1	6	1497				1427	1427	1427	e26b52046ef139bf63509f5b590c18e0_3760	935e3caf510be0c503c97acef35381b2_151	36ade0437952544bcc39850c777ef069_4014	S_aureus_9_01970
WP_000598444.1		YutD family protein	4	4	1	6	1042				383	383	383	e26b52046ef139bf63509f5b590c18e0_1600	935e3caf510be0c503c97acef35381b2_2418	36ade0437952544bcc39850c777ef069_1846	S_aureus_9_00794
WP_000612128.1		urease subunit beta	4	4	1	6	356				410	410	410	e26b52046ef139bf63509f5b590c18e0_4534	935e3caf510be0c503c97acef35381b2_5096	36ade0437952544bcc39850c777ef069_4731	S_aureus_9_01871
WP_000866742.1		glycerate kinase	4	4	1	6	1109				1124	1124	1124	e26b52046ef139bf63509f5b590c18e0_1409	935e3caf510be0c503c97acef35381b2_2639	36ade0437952544bcc39850c777ef069_1479	S_aureus_9_01281
tgt		tRNA guanosine(34) transglycosylase Tgt	4	4	1	6	1719				1139	1139	1139	e26b52046ef139bf63509f5b590c18e0_3080	935e3caf510be0c503c97acef35381b2_806	36ade0437952544bcc39850c777ef069_3360	S_aureus_9_00240
WP_001059082.1		cold-shock protein	4	4	1	6	1184				200	200	200	e26b52046ef139bf63509f5b590c18e0_1523	935e3caf510be0c503c97acef35381b2_2497	36ade0437952544bcc39850c777ef069_1637	S_aureus_9_00862
graF		glycopeptide resistance-associated protein GraF	4	4	1	6	729				134	134	134	e26b52046ef139bf63509f5b590c18e0_1919	935e3caf510be0c503c97acef35381b2_2098	36ade0437952544bcc39850c777ef069_2167	S_aureus_9_01072
WP_000831055.1		LCP family protein	4	4	1	6	378				947	947	947	e26b52046ef139bf63509f5b590c18e0_4578	935e3caf510be0c503c97acef35381b2_5052	36ade0437952544bcc39850c777ef069_4775	S_aureus_9_01723
WP_000521533.1		ABC transporter permease	4	4	1	6	982				926	926	926	e26b52046ef139bf63509f5b590c18e0_1720	935e3caf510be0c503c97acef35381b2_2298	36ade0437952544bcc39850c777ef069_1968	S_aureus_9_02073
rplM		50S ribosomal protein L13	4	4	1	6	814				437	437	437	e26b52046ef139bf63509f5b590c18e0_4390	935e3caf510be0c503c97acef35381b2_5240	36ade0437952544bcc39850c777ef069_4585	S_aureus_9_01802
tagG		teichoic acids export ABC transporter permease subunit TagG	4	4	1	6	1999				812	812	812	e26b52046ef139bf63509f5b590c18e0_1195	935e3caf510be0c503c97acef35381b2_2855	36ade0437952544bcc39850c777ef069_1263	S_aureus_9_02035
dltB		PG:teichoic acid D-alanyltransferase DltB	4	4	1	6	1034				1214	1214	1214	e26b52046ef139bf63509f5b590c18e0_1616	935e3caf510be0c503c97acef35381b2_2402	36ade0437952544bcc39850c777ef069_1862	S_aureus_9_00787
mtaB		tRNA (N(6)-L-threonylcarbamoyladenosine(37)-C(2))-methylthiotransferase MtaB	4	4	1	6	1657				1346	1346	1346	e26b52046ef139bf63509f5b590c18e0_2957	935e3caf510be0c503c97acef35381b2_933	36ade0437952544bcc39850c777ef069_3237	S_aureus_9_00181
WP_000451438.1		helix-turn-helix transcriptional regulator	4	4	1	6	62				335	335	335	e26b52046ef139bf63509f5b590c18e0_4184	935e3caf510be0c503c97acef35381b2_5441	36ade0437952544bcc39850c777ef069_4376	S_aureus_9_01467
vraD		peptide resistance ABC transporter ATP-binding subunit VraD	4	4	1	6	2373				758	758	758	e26b52046ef139bf63509f5b590c18e0_5395	935e3caf510be0c503c97acef35381b2_4243	36ade0437952544bcc39850c777ef069_5578	S_aureus_9_01356
WP_001140871.1		manganese-dependent inorganic pyrophosphatase	4	4	1	6	1476				929	929	929	e26b52046ef139bf63509f5b590c18e0_3804	935e3caf510be0c503c97acef35381b2_107	36ade0437952544bcc39850c777ef069_4058	S_aureus_9_01949
yidC		membrane protein insertase YidC	4	4	1	6	2900				872	872	872	e26b52046ef139bf63509f5b590c18e0_4117	935e3caf510be0c503c97acef35381b2_5508	36ade0437952544bcc39850c777ef069_4309	S_aureus_9_01435
WP_001078309.1		PTS lactose/cellobiose transporter subunit IIA	4	4	1	6	835				311	311	311	e26b52046ef139bf63509f5b590c18e0_4352	935e3caf510be0c503c97acef35381b2_5280	36ade0437952544bcc39850c777ef069_4543	S_aureus_9_02308
WP_000148828.1		YaiI/YqxD family protein	4	4	1	6	1955				458	458	458	e26b52046ef139bf63509f5b590c18e0_1283	935e3caf510be0c503c97acef35381b2_2767	36ade0437952544bcc39850c777ef069_1351	S_aureus_9_01221
queC		7-cyano-7-deazaguanine synthase QueC	4	4	1	6	1924				668	668	668	e26b52046ef139bf63509f5b590c18e0_1345	935e3caf510be0c503c97acef35381b2_2705	36ade0437952544bcc39850c777ef069_1413	S_aureus_9_01252
WP_000019127.1		cation diffusion facilitator family transporter	4	4	1	6	2965				866	866	866	e26b52046ef139bf63509f5b590c18e0_4799	935e3caf510be0c503c97acef35381b2_4829	36ade0437952544bcc39850c777ef069_4994	S_aureus_9_00385
WP_000241344.1		F0F1 ATP synthase subunit delta	4	4	1	6	2883				539	539	539	e26b52046ef139bf63509f5b590c18e0_4150	935e3caf510be0c503c97acef35381b2_5475	36ade0437952544bcc39850c777ef069_4342	S_aureus_9_01450
WP_001291515.1		YdeI family protein	4	4	1	6	3002				599	599	599	e26b52046ef139bf63509f5b590c18e0_4871	935e3caf510be0c503c97acef35381b2_4757	36ade0437952544bcc39850c777ef069_5066	S_aureus_9_00416
trmD		tRNA (guanosine(37)-N1)-methyltransferase TrmD	4	4	1	6	509				737	737	737	e26b52046ef139bf63509f5b590c18e0_2250	935e3caf510be0c503c97acef35381b2_1767	36ade0437952544bcc39850c777ef069_2502	S_aureus_9_00658
WP_000697220.1		GspE/PulE family protein	4	4	1	6	1625				974	974	974	e26b52046ef139bf63509f5b590c18e0_2893	935e3caf510be0c503c97acef35381b2_997	36ade0437952544bcc39850c777ef069_3173	S_aureus_9_00150
WP_000882069.1		UvrB/UvrC motif-containing protein	4	4	1	6	2127				566	566	566	e26b52046ef139bf63509f5b590c18e0_942	935e3caf510be0c503c97acef35381b2_3106	36ade0437952544bcc39850c777ef069_1014	S_aureus_9_02265
WP_000046076.1		NAD(P)/FAD-dependent oxidoreductase	4	4	1	6	1026				1208	1208	1208	e26b52046ef139bf63509f5b590c18e0_1632	935e3caf510be0c503c97acef35381b2_2386	36ade0437952544bcc39850c777ef069_1878	S_aureus_9_00779
WP_001240316.1		inositol monophosphatase	4	4	1	6	649				827	827	827	e26b52046ef139bf63509f5b590c18e0_1977	935e3caf510be0c503c97acef35381b2_2040	36ade0437952544bcc39850c777ef069_2229	S_aureus_9_01044
secDF		protein translocase subunit SecDF	4	4	1	6	1717				2279	2279	2279	e26b52046ef139bf63509f5b590c18e0_3076	935e3caf510be0c503c97acef35381b2_810	36ade0437952544bcc39850c777ef069_3356	S_aureus_9_00238
WP_000491382.1		DUF3147 family protein	4	4	1	6	2381				353	353	353	e26b52046ef139bf63509f5b590c18e0_5417	935e3caf510be0c503c97acef35381b2_4231	36ade0437952544bcc39850c777ef069_5600	S_aureus_9_01365
coaW		type II pantothenate kinase	4	4	1	6	69				803	803	803	e26b52046ef139bf63509f5b590c18e0_4198	935e3caf510be0c503c97acef35381b2_5427	36ade0437952544bcc39850c777ef069_4390	S_aureus_9_01474
WP_000882146.1		DUF443 domain-containing protein	4	4	1	6	2046				629	629	629	e26b52046ef139bf63509f5b590c18e0_1101	935e3caf510be0c503c97acef35381b2_2949	36ade0437952544bcc39850c777ef069_1169	S_aureus_9_02211
ccpA		catabolite control protein A	4	4	1	6	1813				989	989	989	e26b52046ef139bf63509f5b590c18e0_3275	935e3caf510be0c503c97acef35381b2_612	36ade0437952544bcc39850c777ef069_3555	S_aureus_9_00324
hlgB		bi-component gamma-hemolysin HlgAB/HlgCB subunit B	4	4	1	6	2970				977	977	977	e26b52046ef139bf63509f5b590c18e0_4809	935e3caf510be0c503c97acef35381b2_4819	36ade0437952544bcc39850c777ef069_5004	S_aureus_9_00389
liaF		cell wall-active antibiotics response protein LiaF	4	4	1	6	1512				701	701	701	e26b52046ef139bf63509f5b590c18e0_3728	935e3caf510be0c503c97acef35381b2_183	36ade0437952544bcc39850c777ef069_3982	S_aureus_9_01983
ftsZ		cell division protein FtsZ	4	4	1	6	456				1172	1172	1172	e26b52046ef139bf63509f5b590c18e0_2142	935e3caf510be0c503c97acef35381b2_1875	36ade0437952544bcc39850c777ef069_2394	S_aureus_9_00711
WP_000157603.1		F0F1 ATP synthase subunit gamma	4	4	1	6	2885				866	866	866	e26b52046ef139bf63509f5b590c18e0_4146	935e3caf510be0c503c97acef35381b2_5479	36ade0437952544bcc39850c777ef069_4338	S_aureus_9_01448
mraZ		division/cell wall cluster transcriptional repressor MraZ	4	4	1	6	448				431	431	431	e26b52046ef139bf63509f5b590c18e0_2126	935e3caf510be0c503c97acef35381b2_1891	36ade0437952544bcc39850c777ef069_2378	S_aureus_9_00719
WP_000467123.1		heme A synthase	4	4	1	6	641				911	1070	950	e26b52046ef139bf63509f5b590c18e0_1993	935e3caf510be0c503c97acef35381b2_2024	36ade0437952544bcc39850c777ef069_2245	S_aureus_9_01037
WP_000620194.1		GNAT family N-acetyltransferase	4	4	1	6	138				509	509	509	e26b52046ef139bf63509f5b590c18e0_2612	935e3caf510be0c503c97acef35381b2_1386	36ade0437952544bcc39850c777ef069_2912	S_aureus_9_00029
greA		transcription elongation factor GreA	4	4	1	6	1689				476	476	476	e26b52046ef139bf63509f5b590c18e0_3019	935e3caf510be0c503c97acef35381b2_867	36ade0437952544bcc39850c777ef069_3299	S_aureus_9_00212
rpsM		30S ribosomal protein S13	4	4	1	6	806				365	365	365	e26b52046ef139bf63509f5b590c18e0_4406	935e3caf510be0c503c97acef35381b2_5224	36ade0437952544bcc39850c777ef069_4601	S_aureus_9_01810
WP_001037831.1		DUF5011 domain-containing protein	4	4	1	6	713				317	317	317	e26b52046ef139bf63509f5b590c18e0_1886	935e3caf510be0c503c97acef35381b2_2131	36ade0437952544bcc39850c777ef069_2134	S_aureus_9_01088
WP_001110179.1		hypothetical protein	4	4	1	6	1511				386	386	386	e26b52046ef139bf63509f5b590c18e0_3730	935e3caf510be0c503c97acef35381b2_181	36ade0437952544bcc39850c777ef069_3984	S_aureus_9_01982
WP_000837752.1		teichoic acid D-Ala incorporation-associated protein DltX	4	4	1	6	1036				152	152	152	e26b52046ef139bf63509f5b590c18e0_1612	935e3caf510be0c503c97acef35381b2_2406	36ade0437952544bcc39850c777ef069_1858	S_aureus_9_00789
WP_000643623.1		tandem-type lipoprotein	4	4	1	6	2616				773	773	773	e26b52046ef139bf63509f5b590c18e0_293	935e3caf510be0c503c97acef35381b2_3785	36ade0437952544bcc39850c777ef069_339	S_aureus_9_01123
WP_000370182.1		Mini-ribonuclease 3	4	4	1	6	2119				404	404	404	e26b52046ef139bf63509f5b590c18e0_958	935e3caf510be0c503c97acef35381b2_3090	36ade0437952544bcc39850c777ef069_1030	S_aureus_9_02273
capA		capsular polysaccharide type 5/8 biosynthesis protein CapA	4	4	1	6	2560				668	668	668	e26b52046ef139bf63509f5b590c18e0_191	935e3caf510be0c503c97acef35381b2_3909	36ade0437952544bcc39850c777ef069_215	S_aureus_9_00936
rplD		50S ribosomal protein L4	4	4	1	6	783				623	623	623	e26b52046ef139bf63509f5b590c18e0_4452	935e3caf510be0c503c97acef35381b2_5178	36ade0437952544bcc39850c777ef069_4647	S_aureus_9_01833
isdA		LPXTG-anchored heme-scavenging protein IsdA	4	4	1	6	627				1052	1079	1058	e26b52046ef139bf63509f5b590c18e0_2021	935e3caf510be0c503c97acef35381b2_1996	36ade0437952544bcc39850c777ef069_2273	S_aureus_9_01023
pfkB		1-phosphofructokinase	4	4	1	6	1937				920	920	920	e26b52046ef139bf63509f5b590c18e0_1319	935e3caf510be0c503c97acef35381b2_2731	36ade0437952544bcc39850c777ef069_1387	S_aureus_9_01239
WP_000526539.1		TIGR01212 family radical SAM protein	4	4	1	6	1838				953	953	953	e26b52046ef139bf63509f5b590c18e0_3327	935e3caf510be0c503c97acef35381b2_560	36ade0437952544bcc39850c777ef069_3607	S_aureus_9_00348
group_1892	gap	type I glyceraldehyde-3-phosphate dehydrogenase	4	4	1	6	1144				1010	1010	1010	e26b52046ef139bf63509f5b590c18e0_1476	935e3caf510be0c503c97acef35381b2_2574	36ade0437952544bcc39850c777ef069_1544	S_aureus_9_00882
rpmI		50S ribosomal protein L35	4	4	1	6	1753				200	200	200	e26b52046ef139bf63509f5b590c18e0_3152	935e3caf510be0c503c97acef35381b2_734	36ade0437952544bcc39850c777ef069_3432	S_aureus_9_00270
cozEa		cell elongation protein CozEa	4	4	1	6	2947				1085	1085	1085	e26b52046ef139bf63509f5b590c18e0_1770	935e3caf510be0c503c97acef35381b2_2248	36ade0437952544bcc39850c777ef069_2022	S_aureus_9_02098
WP_001173165.1		cation:dicarboxylase symporter family transporter	4	4	1	6	31				1277	1277	1277	e26b52046ef139bf63509f5b590c18e0_4731	935e3caf510be0c503c97acef35381b2_4901	36ade0437952544bcc39850c777ef069_4924	S_aureus_9_01793
atpD		F0F1 ATP synthase subunit beta	4	4	1	6	2886				1412	1412	1412	e26b52046ef139bf63509f5b590c18e0_4144	935e3caf510be0c503c97acef35381b2_5481	36ade0437952544bcc39850c777ef069_4336	S_aureus_9_01447
WP_000009069.1		hypothetical protein	4	4	1	6	730				1295	1295	1295	e26b52046ef139bf63509f5b590c18e0_1921	935e3caf510be0c503c97acef35381b2_2096	36ade0437952544bcc39850c777ef069_2169	S_aureus_9_01071
WP_000624945.1		MerR family transcriptional regulator	4	4	1	6	263				368	368	368	e26b52046ef139bf63509f5b590c18e0_2388	935e3caf510be0c503c97acef35381b2_1629	36ade0437952544bcc39850c777ef069_2638	S_aureus_9_02357
coaD		pantetheine-phosphate adenylyltransferase	4	4	1	6	632				482	482	482	e26b52046ef139bf63509f5b590c18e0_2011	935e3caf510be0c503c97acef35381b2_2006	36ade0437952544bcc39850c777ef069_2263	S_aureus_9_01028
adsA		LPXTG-anchored adenosine synthase AdsA	4	4	1	6	2410				2318	2318	2318	e26b52046ef139bf63509f5b590c18e0_55	935e3caf510be0c503c97acef35381b2_4165	36ade0437952544bcc39850c777ef069_55	S_aureus_9_01396
isdD		iron-regulated surface determinant protein IsdD	4	4	1	6	625				1076	1076	1076	e26b52046ef139bf63509f5b590c18e0_2025	935e3caf510be0c503c97acef35381b2_1992	36ade0437952544bcc39850c777ef069_2277	S_aureus_9_01021
rpsN		30S ribosomal protein S14	4	4	1	6	222				269	269	269	e26b52046ef139bf63509f5b590c18e0_2440	935e3caf510be0c503c97acef35381b2_1561	36ade0437952544bcc39850c777ef069_2742	S_aureus_9_01895
WP_000568351.1		thiamine pyrophosphate-dependent dehydrogenase E1 component subunit alpha	4	4	1	6	1598				992	992	992	e26b52046ef139bf63509f5b590c18e0_2838	935e3caf510be0c503c97acef35381b2_1052	36ade0437952544bcc39850c777ef069_3118	S_aureus_9_00124
nrdI		class Ib ribonucleoside-diphosphate reductase assembly flavoprotein NrdI	4	4	1	6	1096				398	398	398	e26b52046ef139bf63509f5b590c18e0_1383	935e3caf510be0c503c97acef35381b2_2665	36ade0437952544bcc39850c777ef069_1453	S_aureus_9_01269
pyrH		UMP kinase	4	4	1	6	311				722	722	722	e26b52046ef139bf63509f5b590c18e0_2290	935e3caf510be0c503c97acef35381b2_1727	36ade0437952544bcc39850c777ef069_2540	S_aureus_9_00642
WP_000208737.1		biotin transporter BioY	4	4	1	6	350				554	554	554	e26b52046ef139bf63509f5b590c18e0_4522	935e3caf510be0c503c97acef35381b2_5108	36ade0437952544bcc39850c777ef069_4719	S_aureus_9_01865
gpsB		cell division regulator GpsB	4	4	1	6	1349				344	344	344	e26b52046ef139bf63509f5b590c18e0_2665	935e3caf510be0c503c97acef35381b2_1329	36ade0437952544bcc39850c777ef069_2967	S_aureus_9_00054
recQ		DNA helicase RecQ	4	4	1	6	1087				1781	1781	1781	e26b52046ef139bf63509f5b590c18e0_1363	935e3caf510be0c503c97acef35381b2_2687	36ade0437952544bcc39850c777ef069_1431	S_aureus_9_01260
isdE		heme ABC transporter substrate-binding protein IsdE	4	4	1	6	624				878	878	878	e26b52046ef139bf63509f5b590c18e0_2027	935e3caf510be0c503c97acef35381b2_1990	36ade0437952544bcc39850c777ef069_2279	S_aureus_9_01020
WP_000634175.1		universal stress protein	4	4	1	6	1784				500	500	500	e26b52046ef139bf63509f5b590c18e0_3217	935e3caf510be0c503c97acef35381b2_670	36ade0437952544bcc39850c777ef069_3497	S_aureus_9_00299
WP_000731878.1		glycine cleavage system protein H	4	4	1	6	2720				332	332	332	e26b52046ef139bf63509f5b590c18e0_529	935e3caf510be0c503c97acef35381b2_3543	36ade0437952544bcc39850c777ef069_573	S_aureus_9_01585
prfA		peptide chain release factor 1	4	4	1	6	2871				1076	1076	1076	e26b52046ef139bf63509f5b590c18e0_4174	935e3caf510be0c503c97acef35381b2_5451	36ade0437952544bcc39850c777ef069_4366	S_aureus_9_01462
WP_000669861.1		NETI motif-containing protein	4	4	1	6	1485				173	173	173	e26b52046ef139bf63509f5b590c18e0_3784	935e3caf510be0c503c97acef35381b2_127	36ade0437952544bcc39850c777ef069_4038	S_aureus_9_01958
rpsR		30S ribosomal protein S18	4	4	1	6	2761				242	242	242	e26b52046ef139bf63509f5b590c18e0_614	935e3caf510be0c503c97acef35381b2_3458	36ade0437952544bcc39850c777ef069_658	S_aureus_9_01542
WP_000287265.1		competence protein ComK	4	4	1	6	672				569	569	569	e26b52046ef139bf63509f5b590c18e0_1802	935e3caf510be0c503c97acef35381b2_2215	36ade0437952544bcc39850c777ef069_2054	S_aureus_9_02113
whiA		DNA-binding protein WhiA	4	4	1	6	1139				944	944	944	e26b52046ef139bf63509f5b590c18e0_1466	935e3caf510be0c503c97acef35381b2_2584	36ade0437952544bcc39850c777ef069_1534	S_aureus_9_01307
WP_001165377.1		HesB/YadR/YfhF family protein	4	4	1	6	205				296	296	296	e26b52046ef139bf63509f5b590c18e0_2474	935e3caf510be0c503c97acef35381b2_1527	36ade0437952544bcc39850c777ef069_2776	S_aureus_9_01910
WP_001045133.1		response regulator transcription factor	4	4	1	6	2853				623	623	623	e26b52046ef139bf63509f5b590c18e0_3521	935e3caf510be0c503c97acef35381b2_352	36ade0437952544bcc39850c777ef069_3811	S_aureus_9_02248
WP_000354184.1		VOC family protein	4	4	1	6	476				401	401	401	e26b52046ef139bf63509f5b590c18e0_2184	935e3caf510be0c503c97acef35381b2_1833	36ade0437952544bcc39850c777ef069_2436	S_aureus_9_00691
rpsE		30S ribosomal protein S5	4	4	1	6	799				500	500	500	e26b52046ef139bf63509f5b590c18e0_4420	935e3caf510be0c503c97acef35381b2_5210	36ade0437952544bcc39850c777ef069_4615	S_aureus_9_01817
ilvC		ketol-acid reductoisomerase	4	4	1	6	588				1004	1004	1004	e26b52046ef139bf63509f5b590c18e0_4034	935e3caf510be0c503c97acef35381b2_5591	36ade0437952544bcc39850c777ef069_4222	S_aureus_9_01709
zapA		cell division protein ZapA	4	4	1	6	615				259	266	260	e26b52046ef139bf63509f5b590c18e0_2045	935e3caf510be0c503c97acef35381b2_1972	36ade0437952544bcc39850c777ef069_2297	S_aureus_9_01012
WP_000859443.1		helix-turn-helix domain-containing protein	4	4	1	6	287				392	392	392	e26b52046ef139bf63509f5b590c18e0_2338	935e3caf510be0c503c97acef35381b2_1679	36ade0437952544bcc39850c777ef069_2588	S_aureus_9_00618
WP_001077683.1		GTP pyrophosphokinase family protein	4	4	1	6	2953				635	635	635	e26b52046ef139bf63509f5b590c18e0_1758	935e3caf510be0c503c97acef35381b2_2260	36ade0437952544bcc39850c777ef069_2010	S_aureus_9_02092
sdaAA		L-serine ammonia-lyase, iron-sulfur-dependent, subunit alpha	4	4	1	6	3187				899	899	899	e26b52046ef139bf63509f5b590c18e0_5043	935e3caf510be0c503c97acef35381b2_4599	36ade0437952544bcc39850c777ef069_5224	S_aureus_9_00492
mgrA		HTH-type transcriptional regulator MgrA	4	4	1	6	1950				443	443	443	e26b52046ef139bf63509f5b590c18e0_1293	935e3caf510be0c503c97acef35381b2_2757	36ade0437952544bcc39850c777ef069_1361	S_aureus_9_01226
WP_000011823.1		hypothetical protein	4	4	1	6	234				854	854	854	e26b52046ef139bf63509f5b590c18e0_2416	935e3caf510be0c503c97acef35381b2_1585	36ade0437952544bcc39850c777ef069_2718	S_aureus_9_02550
WP_000241588.1		Asp23/Gls24 family envelope stress response protein	4	4	1	6	1606				362	362	362	e26b52046ef139bf63509f5b590c18e0_2854	935e3caf510be0c503c97acef35381b2_1036	36ade0437952544bcc39850c777ef069_3134	S_aureus_9_00132
WP_000272070.1		heptaprenylglyceryl phosphate synthase	4	4	1	6	1490				692	692	692	e26b52046ef139bf63509f5b590c18e0_3774	935e3caf510be0c503c97acef35381b2_137	36ade0437952544bcc39850c777ef069_4028	S_aureus_9_01963
WP_000145163.1		sterile alpha motif-like domain-containing protein	4	4	1	6	1190				203	203	203	e26b52046ef139bf63509f5b590c18e0_1535	935e3caf510be0c503c97acef35381b2_2485	36ade0437952544bcc39850c777ef069_1649	S_aureus_9_00856
rplA		50S ribosomal protein L1	4	4	1	6	2111				692	692	692	e26b52046ef139bf63509f5b590c18e0_974	935e3caf510be0c503c97acef35381b2_3074	36ade0437952544bcc39850c777ef069_1046	S_aureus_9_02280
group_1929	rpmG	50S ribosomal protein L33	4	4	1	6	223				149	149	149	e26b52046ef139bf63509f5b590c18e0_2438	935e3caf510be0c503c97acef35381b2_1563	36ade0437952544bcc39850c777ef069_2740	S_aureus_9_01894
WP_000765708.1		hypothetical protein	4	4	1	6	334				146	146	146	e26b52046ef139bf63509f5b590c18e0_2091	935e3caf510be0c503c97acef35381b2_1926	36ade0437952544bcc39850c777ef069_2343	S_aureus_9_00738
dltC		D-alanine--poly(phosphoribitol) ligase subunit 2	4	4	1	6	1033				236	236	236	e26b52046ef139bf63509f5b590c18e0_1618	935e3caf510be0c503c97acef35381b2_2400	36ade0437952544bcc39850c777ef069_1864	S_aureus_9_00786
WP_000923036.1		DUF443 domain-containing protein	4	4	1	6	2041				629	629	629	e26b52046ef139bf63509f5b590c18e0_1111	935e3caf510be0c503c97acef35381b2_2939	36ade0437952544bcc39850c777ef069_1179	S_aureus_9_02215
gcvT		glycine cleavage system aminomethyltransferase GcvT	4	4	1	6	1617				1091	1091	1091	e26b52046ef139bf63509f5b590c18e0_2876	935e3caf510be0c503c97acef35381b2_1014	36ade0437952544bcc39850c777ef069_3156	S_aureus_9_00143
WP_000411298.1		kinase/pyrophosphorylase	4	4	1	6	1644				818	818	818	e26b52046ef139bf63509f5b590c18e0_2931	935e3caf510be0c503c97acef35381b2_959	36ade0437952544bcc39850c777ef069_3211	S_aureus_9_00168
gatA		Asp-tRNA(Asn)/Glu-tRNA(Gln) amidotransferase subunit GatA	4	4	1	6	1496				1457	1457	1457	e26b52046ef139bf63509f5b590c18e0_3762	935e3caf510be0c503c97acef35381b2_149	36ade0437952544bcc39850c777ef069_4016	S_aureus_9_01969
dnaA		chromosomal replication initiator protein DnaA	4	4	1	6	2388				1361	1361	1361	e26b52046ef139bf63509f5b590c18e0_3	935e3caf510be0c503c97acef35381b2_4217	36ade0437952544bcc39850c777ef069_3	S_aureus_9_01372
WP_000678764.1		hypothetical protein	4	4	1	6	3047				266	266	266	e26b52046ef139bf63509f5b590c18e0_4957	935e3caf510be0c503c97acef35381b2_4677	36ade0437952544bcc39850c777ef069_5140	S_aureus_9_00453
atpE		F0F1 ATP synthase subunit C	4	4	1	6	2881				212	212	212	e26b52046ef139bf63509f5b590c18e0_4154	935e3caf510be0c503c97acef35381b2_5471	36ade0437952544bcc39850c777ef069_4346	S_aureus_9_01452
sigS		RNA polymerase sigma factor SigS	4	4	1	6	1855				470	470	470	e26b52046ef139bf63509f5b590c18e0_3362	935e3caf510be0c503c97acef35381b2_529	36ade0437952544bcc39850c777ef069_3636	S_aureus_9_02434
dltD		D-alanyl-lipoteichoic acid biosynthesis protein DltD	4	4	1	6	1032				1175	1175	1175	e26b52046ef139bf63509f5b590c18e0_1620	935e3caf510be0c503c97acef35381b2_2398	36ade0437952544bcc39850c777ef069_1866	S_aureus_9_00785
WP_001802045.1		hypothetical protein	4	4	1	6	335				197	224	217	e26b52046ef139bf63509f5b590c18e0_2093	935e3caf510be0c503c97acef35381b2_1924	36ade0437952544bcc39850c777ef069_2345	S_aureus_9_00737
WP_001178619.1		uracil permease	4	4	1	6	468				1307	1307	1307	e26b52046ef139bf63509f5b590c18e0_2168	935e3caf510be0c503c97acef35381b2_1849	36ade0437952544bcc39850c777ef069_2420	S_aureus_9_00699
WP_001224793.1		acetyltransferase	4	4	1	6	1133				485	485	485	e26b52046ef139bf63509f5b590c18e0_1456	935e3caf510be0c503c97acef35381b2_2594	36ade0437952544bcc39850c777ef069_1524	S_aureus_9_01301
WP_000435806.1		YfhH family protein	4	4	1	6	1526				314	314	314	e26b52046ef139bf63509f5b590c18e0_3666	935e3caf510be0c503c97acef35381b2_211	36ade0437952544bcc39850c777ef069_3954	S_aureus_9_01997
WP_000987949.1		TIGR04197 family type VII secretion effector	4	4	1	6	3128				278	278	278	e26b52046ef139bf63509f5b590c18e0_5159	935e3caf510be0c503c97acef35381b2_4483	36ade0437952544bcc39850c777ef069_5340	S_aureus_9_00549
WP_000762708.1		putative metal homeostasis protein	4	4	1	6	2963				104	104	104	e26b52046ef139bf63509f5b590c18e0_4795	935e3caf510be0c503c97acef35381b2_4833	36ade0437952544bcc39850c777ef069_4990	S_aureus_9_00383
rpmF		50S ribosomal protein L32	4	4	1	6	629				173	173	173	e26b52046ef139bf63509f5b590c18e0_2017	935e3caf510be0c503c97acef35381b2_2000	36ade0437952544bcc39850c777ef069_2269	S_aureus_9_01025
gpmI		2,3-bisphosphoglycerate-independent phosphoglycerate mutase	4	4	1	6	1147				1517	1517	1517	e26b52046ef139bf63509f5b590c18e0_1482	935e3caf510be0c503c97acef35381b2_2568	36ade0437952544bcc39850c777ef069_1550	S_aureus_9_00879
WP_000198598.1		GbsR/MarR family transcriptional regulator	4	4	1	6	3102				563	563	563	e26b52046ef139bf63509f5b590c18e0_5211	935e3caf510be0c503c97acef35381b2_4427	36ade0437952544bcc39850c777ef069_5394	S_aureus_9_00574
group_1948	lepB	signal peptidase I	4	4	1	6	1002				575	575	575	e26b52046ef139bf63509f5b590c18e0_1680	935e3caf510be0c503c97acef35381b2_2338	36ade0437952544bcc39850c777ef069_1926	S_aureus_9_00755
sarT		HTH-type transcriptional regulator SarT	4	4	1	6	3226				356	356	356	e26b52046ef139bf63509f5b590c18e0_4971	935e3caf510be0c503c97acef35381b2_4667	36ade0437952544bcc39850c777ef069_5150	S_aureus_9_00458
WP_000149423.1		hypothetical protein	4	4	1	6	341				227	227	227	e26b52046ef139bf63509f5b590c18e0_2107	935e3caf510be0c503c97acef35381b2_1910	36ade0437952544bcc39850c777ef069_2359	S_aureus_9_00730
WP_001088978.1		BCCT family transporter	4	4	1	6	208				1646	1646	1646	e26b52046ef139bf63509f5b590c18e0_2468	935e3caf510be0c503c97acef35381b2_1533	36ade0437952544bcc39850c777ef069_2770	S_aureus_9_01907
tuf		elongation factor Tu	4	4	1	6	2101				1184	1184	1184	e26b52046ef139bf63509f5b590c18e0_995	935e3caf510be0c503c97acef35381b2_3053	36ade0437952544bcc39850c777ef069_1067	S_aureus_9_02290
WP_000792417.1		septum formation initiator family protein	4	4	1	6	2144				392	392	392	e26b52046ef139bf63509f5b590c18e0_872	935e3caf510be0c503c97acef35381b2_3188	36ade0437952544bcc39850c777ef069_932	S_aureus_9_02395
WP_000960854.1		L-lactate permease	4	4	1	6	434				1598	1598	1598	e26b52046ef139bf63509f5b590c18e0_4697	935e3caf510be0c503c97acef35381b2_4937	36ade0437952544bcc39850c777ef069_4890	S_aureus_9_01777
WP_001222105.1		TIGR00282 family metallophosphoesterase	4	4	1	6	281				797	797	797	e26b52046ef139bf63509f5b590c18e0_2350	935e3caf510be0c503c97acef35381b2_1667	36ade0437952544bcc39850c777ef069_2600	S_aureus_9_02338
purS		phosphoribosylformylglycinamidine synthase subunit PurS	4	4	1	6	718				263	263	263	e26b52046ef139bf63509f5b590c18e0_1896	935e3caf510be0c503c97acef35381b2_2121	36ade0437952544bcc39850c777ef069_2144	S_aureus_9_01083
WP_001190118.1		16S rRNA (uracil(1498)-N(3))-methyltransferase	4	4	1	6	1658				752	752	752	e26b52046ef139bf63509f5b590c18e0_2959	935e3caf510be0c503c97acef35381b2_931	36ade0437952544bcc39850c777ef069_3239	S_aureus_9_00182
rpoE		DNA-directed RNA polymerase subunit delta	4	4	1	6	67				530	530	530	e26b52046ef139bf63509f5b590c18e0_4194	935e3caf510be0c503c97acef35381b2_5431	36ade0437952544bcc39850c777ef069_4386	S_aureus_9_01472
WP_000514290.1		TrkA family potassium uptake protein	4	4	1	6	738				662	662	662	e26b52046ef139bf63509f5b590c18e0_1937	935e3caf510be0c503c97acef35381b2_2080	36ade0437952544bcc39850c777ef069_2185	S_aureus_9_01063
WP_000769722.1		PepSY domain-containing protein	4	4	1	6	2765				572	572	572	e26b52046ef139bf63509f5b590c18e0_624	935e3caf510be0c503c97acef35381b2_3448	36ade0437952544bcc39850c777ef069_668	S_aureus_9_01536
rsmH		16S rRNA (cytosine(1402)-N(4))-methyltransferase RsmH	4	4	1	6	449				914	935	924	e26b52046ef139bf63509f5b590c18e0_2128	935e3caf510be0c503c97acef35381b2_1889	36ade0437952544bcc39850c777ef069_2380	S_aureus_9_00718
WP_001024095.1		SDR family oxidoreductase	4	4	1	6	83				665	665	665	e26b52046ef139bf63509f5b590c18e0_4226	935e3caf510be0c503c97acef35381b2_5399	36ade0437952544bcc39850c777ef069_4418	S_aureus_9_01488
pstA		phosphate ABC transporter permease PstA	4	4	1	6	171				917	917	917	e26b52046ef139bf63509f5b590c18e0_2544	935e3caf510be0c503c97acef35381b2_1455	36ade0437952544bcc39850c777ef069_2846	S_aureus_9_01943
ispE		4-(cytidine 5'-diphospho)-2-C-methyl-D-erythritol kinase	4	4	1	6	2156				848	848	848	e26b52046ef139bf63509f5b590c18e0_846	935e3caf510be0c503c97acef35381b2_3214	36ade0437952544bcc39850c777ef069_906	S_aureus_9_02407
WP_000719329.1		alpha/beta hydrolase	4	4	1	6	838				869	869	869	e26b52046ef139bf63509f5b590c18e0_4346	935e3caf510be0c503c97acef35381b2_5286	36ade0437952544bcc39850c777ef069_4537	S_aureus_9_02311
purF		amidophosphoribosyltransferase	4	4	1	6	721				1484	1484	1484	e26b52046ef139bf63509f5b590c18e0_1902	935e3caf510be0c503c97acef35381b2_2115	36ade0437952544bcc39850c777ef069_2150	S_aureus_9_01080
WP_000746687.1		NDxxF motif lipoprotein	4	4	1	6	2773				626	626	626	e26b52046ef139bf63509f5b590c18e0_636	935e3caf510be0c503c97acef35381b2_3436	36ade0437952544bcc39850c777ef069_680	S_aureus_9_01530
narI		respiratory nitrate reductase subunit gamma	4	4	1	6	39				677	677	677	e26b52046ef139bf63509f5b590c18e0_4747	935e3caf510be0c503c97acef35381b2_4881	36ade0437952544bcc39850c777ef069_4940	S_aureus_9_00361
WP_000136950.1		alpha/beta hydrolase	4	4	1	6	269				914	917	914	e26b52046ef139bf63509f5b590c18e0_2376	935e3caf510be0c503c97acef35381b2_1641	36ade0437952544bcc39850c777ef069_2626	S_aureus_9_02351
WP_000825929.1		transporter substrate-binding domain-containing protein	4	4	1	6	2961				779	779	779	e26b52046ef139bf63509f5b590c18e0_4791	935e3caf510be0c503c97acef35381b2_4837	36ade0437952544bcc39850c777ef069_4986	S_aureus_9_00381
WP_000897635.1		nitric oxide synthase oxygenase	4	4	1	6	1481				1076	1076	1076	e26b52046ef139bf63509f5b590c18e0_3792	935e3caf510be0c503c97acef35381b2_119	36ade0437952544bcc39850c777ef069_4046	S_aureus_9_01954
WP_001805409.1		RNA-binding protein	4	4	1	6	461				779	806	785	e26b52046ef139bf63509f5b590c18e0_2152	935e3caf510be0c503c97acef35381b2_1865	36ade0437952544bcc39850c777ef069_2404	S_aureus_9_00706
icaD		intracellular adhesion protein D	4	4	1	6	2339				305	305	305	e26b52046ef139bf63509f5b590c18e0_5335	935e3caf510be0c503c97acef35381b2_4305	36ade0437952544bcc39850c777ef069_5518	S_aureus_9_01323
panC		pantoate--beta-alanine ligase	4	4	1	6	3119				851	851	851	e26b52046ef139bf63509f5b590c18e0_5177	935e3caf510be0c503c97acef35381b2_4461	36ade0437952544bcc39850c777ef069_5360	S_aureus_9_00559
WP_000277415.1		quinone-dependent dihydroorotate dehydrogenase	4	4	1	6	3126				1064	1064	1064	e26b52046ef139bf63509f5b590c18e0_5163	935e3caf510be0c503c97acef35381b2_4479	36ade0437952544bcc39850c777ef069_5344	S_aureus_9_00551
ribE		6,7-dimethyl-8-ribityllumazine synthase	4	4	1	6	1846				464	464	464	e26b52046ef139bf63509f5b590c18e0_3341	935e3caf510be0c503c97acef35381b2_548	36ade0437952544bcc39850c777ef069_3617	S_aureus_9_02424
hemL		glutamate-1-semialdehyde 2,1-aminomutase	4	4	1	6	1740				1286	1286	1286	e26b52046ef139bf63509f5b590c18e0_3126	935e3caf510be0c503c97acef35381b2_760	36ade0437952544bcc39850c777ef069_3406	S_aureus_9_00258
arcD		arginine-ornithine antiporter	4	4	1	6	3076				1430	1430	1430	e26b52046ef139bf63509f5b590c18e0_5265	935e3caf510be0c503c97acef35381b2_4375	36ade0437952544bcc39850c777ef069_5448	S_aureus_9_00595
group_1977	deoC	deoxyribose-phosphate aldolase	4	4	1	6	76				662	662	662	e26b52046ef139bf63509f5b590c18e0_4212	935e3caf510be0c503c97acef35381b2_5413	36ade0437952544bcc39850c777ef069_4404	S_aureus_9_01481
recX		recombination regulator RecX	4	4	1	6	1525				818	818	818	e26b52046ef139bf63509f5b590c18e0_3668	935e3caf510be0c503c97acef35381b2_209	36ade0437952544bcc39850c777ef069_3956	S_aureus_9_01996
rplR		50S ribosomal protein L18	4	4	1	6	798				359	359	359	e26b52046ef139bf63509f5b590c18e0_4422	935e3caf510be0c503c97acef35381b2_5208	36ade0437952544bcc39850c777ef069_4617	S_aureus_9_01818
WP_001198024.1		TM2 domain-containing protein	4	4	1	6	483				203	278	221	e26b52046ef139bf63509f5b590c18e0_2198	935e3caf510be0c503c97acef35381b2_1819	36ade0437952544bcc39850c777ef069_2450	S_aureus_9_00684
mvk		mevalonate kinase	4	4	1	6	2060				920	920	920	e26b52046ef139bf63509f5b590c18e0_1077	935e3caf510be0c503c97acef35381b2_2971	36ade0437952544bcc39850c777ef069_1149	S_aureus_9_02193
gcvPB		aminomethyl-transferring glycine dehydrogenase subunit GcvPB	4	4	1	6	1615				1472	1472	1472	e26b52046ef139bf63509f5b590c18e0_2872	935e3caf510be0c503c97acef35381b2_1018	36ade0437952544bcc39850c777ef069_3152	S_aureus_9_00141
WP_001151451.1		FMN-dependent NADH-azoreductase	4	4	1	6	2618				626	626	626	e26b52046ef139bf63509f5b590c18e0_295	935e3caf510be0c503c97acef35381b2_3783	36ade0437952544bcc39850c777ef069_341	S_aureus_9_01124
holA		DNA polymerase III subunit delta	4	4	1	6	1667				974	974	974	e26b52046ef139bf63509f5b590c18e0_2977	935e3caf510be0c503c97acef35381b2_911	36ade0437952544bcc39850c777ef069_3257	S_aureus_9_00191
WP_000622698.1		low specificity L-threonine aldolase	4	4	1	6	244				1025	1025	1025	e26b52046ef139bf63509f5b590c18e0_2398	935e3caf510be0c503c97acef35381b2_1603	36ade0437952544bcc39850c777ef069_2700	S_aureus_9_02373
pknB		serine/threonine protein kinase Stk1	4	4	1	6	489				1994	1994	1994	e26b52046ef139bf63509f5b590c18e0_2210	935e3caf510be0c503c97acef35381b2_1807	36ade0437952544bcc39850c777ef069_2462	S_aureus_9_00678
WP_000786121.1		YhgE/Pip domain-containing protein	4	4	1	6	3065				2981	2981	2981	e26b52046ef139bf63509f5b590c18e0_5287	935e3caf510be0c503c97acef35381b2_4353	36ade0437952544bcc39850c777ef069_5470	S_aureus_9_00605
WP_000495671.1		hypothetical protein	4	4	1	6	86				1091	1091	1091	e26b52046ef139bf63509f5b590c18e0_4232	935e3caf510be0c503c97acef35381b2_5393	36ade0437952544bcc39850c777ef069_4424	S_aureus_9_01491
WP_000757406.1		DUF5067 domain-containing protein	4	4	1	6	1172				728	728	728	e26b52046ef139bf63509f5b590c18e0_1503	935e3caf510be0c503c97acef35381b2_2515	36ade0437952544bcc39850c777ef069_1619	S_aureus_9_00870
deoC		deoxyribose-phosphate aldolase	4	4	1	6	2545				662	662	662	e26b52046ef139bf63509f5b590c18e0_171	935e3caf510be0c503c97acef35381b2_3935	36ade0437952544bcc39850c777ef069_193	S_aureus_9_00949
WP_000706110.1		PTS fructose transporter subunit IIABC	4	4	1	6	3067				1952	1952	1952	e26b52046ef139bf63509f5b590c18e0_5283	935e3caf510be0c503c97acef35381b2_4357	36ade0437952544bcc39850c777ef069_5466	S_aureus_9_00603
WP_000432348.1		anion permease	4	4	1	6	2367				1418	1418	1418	e26b52046ef139bf63509f5b590c18e0_5383	935e3caf510be0c503c97acef35381b2_4255	36ade0437952544bcc39850c777ef069_5566	S_aureus_9_01350
WP_001060842.1		Nramp family divalent metal transporter	4	4	1	6	651				1352	1352	1352	e26b52046ef139bf63509f5b590c18e0_1973	935e3caf510be0c503c97acef35381b2_2044	36ade0437952544bcc39850c777ef069_2225	S_aureus_9_01046
ypdF		aminopeptidase P family protein	4	4	1	6	1610				1061	1061	1061	e26b52046ef139bf63509f5b590c18e0_2862	935e3caf510be0c503c97acef35381b2_1028	36ade0437952544bcc39850c777ef069_3142	S_aureus_9_00136
WP_000206109.1		DUF4870 domain-containing protein	4	4	1	6	370				422	422	422	e26b52046ef139bf63509f5b590c18e0_4562	935e3caf510be0c503c97acef35381b2_5068	36ade0437952544bcc39850c777ef069_4759	S_aureus_9_01884
WP_000794020.1		NAD(P)/FAD-dependent oxidoreductase	4	4	1	6	1029				1064	1064	1064	e26b52046ef139bf63509f5b590c18e0_1626	935e3caf510be0c503c97acef35381b2_2392	36ade0437952544bcc39850c777ef069_1872	S_aureus_9_00782
addB		helicase-exonuclease AddAB subunit AddB	4	4	1	6	1001				3476	3476	3476	e26b52046ef139bf63509f5b590c18e0_1682	935e3caf510be0c503c97acef35381b2_2336	36ade0437952544bcc39850c777ef069_1928	S_aureus_9_00754
WP_000395153.1		monovalent cation:proton antiporter family protein	4	4	1	6	2949				1844	1844	1844	e26b52046ef139bf63509f5b590c18e0_1766	935e3caf510be0c503c97acef35381b2_2252	36ade0437952544bcc39850c777ef069_2018	S_aureus_9_02096
ezrA		septation ring formation regulator EzrA	4	4	1	6	1791				1694	1694	1694	e26b52046ef139bf63509f5b590c18e0_3233	935e3caf510be0c503c97acef35381b2_654	36ade0437952544bcc39850c777ef069_3513	S_aureus_9_00306
lmrS		multidrug efflux MFS transporter LmrS	4	4	1	6	860				1442	1442	1442	e26b52046ef139bf63509f5b590c18e0_4300	935e3caf510be0c503c97acef35381b2_5330	36ade0437952544bcc39850c777ef069_4493	S_aureus_9_02332
eap		extracellular adherence protein Eap/Map	4	6	1.5	6	1456				257	2063	1207	e26b52046ef139bf63509f5b590c18e0_3846 e26b52046ef139bf63509f5b590c18e0_3848	935e3caf510be0c503c97acef35381b2_65 935e3caf510be0c503c97acef35381b2_63	36ade0437952544bcc39850c777ef069_4100	S_aureus_9_02534
WP_000662023.1		tRNA-dihydrouridine synthase	4	5	1.25	6	2490				452	986	772	e26b52046ef139bf63509f5b590c18e0_59	935e3caf510be0c503c97acef35381b2_4043	36ade0437952544bcc39850c777ef069_89 36ade0437952544bcc39850c777ef069_73	S_aureus_9_02463
WP_064136471.1		hypothetical protein	4	4	1	6	260				161	194	185	e26b52046ef139bf63509f5b590c18e0_2396	935e3caf510be0c503c97acef35381b2_1605	36ade0437952544bcc39850c777ef069_2698	S_aureus_9_02369
raiA		ribosome-associated translation inhibitor RaiA	4	4	1	6	1119				572	572	572	e26b52046ef139bf63509f5b590c18e0_1429	935e3caf510be0c503c97acef35381b2_2619	36ade0437952544bcc39850c777ef069_1499	S_aureus_9_01291
dat		D-amino-acid transaminase	4	4	1	6	1828				848	848	848	e26b52046ef139bf63509f5b590c18e0_3307	935e3caf510be0c503c97acef35381b2_580	36ade0437952544bcc39850c777ef069_3587	S_aureus_9_00338
WP_000646195.1		zinc-binding dehydrogenase	4	4	1	6	2654				1055	1055	1055	e26b52046ef139bf63509f5b590c18e0_379	935e3caf510be0c503c97acef35381b2_3703	36ade0437952544bcc39850c777ef069_419	S_aureus_9_01160
mnmG		tRNA uridine-5-carboxymethylaminomethyl(34) synthesis enzyme MnmG	4	4	1	6	2384				1877	1877	1877	e26b52046ef139bf63509f5b590c18e0_5423	935e3caf510be0c503c97acef35381b2_4225	36ade0437952544bcc39850c777ef069_5606	S_aureus_9_01368
WP_001096642.1		alpha-ketoacid dehydrogenase subunit beta	4	4	1	6	1597				983	983	983	e26b52046ef139bf63509f5b590c18e0_2836	935e3caf510be0c503c97acef35381b2_1054	36ade0437952544bcc39850c777ef069_3116	S_aureus_9_00123
gcvPA		aminomethyl-transferring glycine dehydrogenase subunit GcvPA	4	4	1	6	1616				1346	1346	1346	e26b52046ef139bf63509f5b590c18e0_2874	935e3caf510be0c503c97acef35381b2_1016	36ade0437952544bcc39850c777ef069_3154	S_aureus_9_00142
WP_001191874.1		DUF1361 domain-containing protein	4	4	1	6	1943				617	617	617	e26b52046ef139bf63509f5b590c18e0_1307	935e3caf510be0c503c97acef35381b2_2743	36ade0437952544bcc39850c777ef069_1375	S_aureus_9_01233
WP_001788788.1		5-bromo-4-chloroindolyl phosphate hydrolysis family protein	4	4	1	6	153				623	629	627	e26b52046ef139bf63509f5b590c18e0_2580	935e3caf510be0c503c97acef35381b2_1418	36ade0437952544bcc39850c777ef069_2882	S_aureus_9_00015
WP_000774684.1		demethylmenaquinone methyltransferase	4	4	1	6	1375				725	725	725	e26b52046ef139bf63509f5b590c18e0_2715	935e3caf510be0c503c97acef35381b2_1279	36ade0437952544bcc39850c777ef069_3017	S_aureus_9_00078
rpiA		ribose 5-phosphate isomerase A	4	4	1	6	404				686	686	686	e26b52046ef139bf63509f5b590c18e0_4633	935e3caf510be0c503c97acef35381b2_4999	36ade0437952544bcc39850c777ef069_4828	S_aureus_9_01748
WP_000284433.1		nicotinate phosphoribosyltransferase	4	4	1	6	1482				1469	1469	1469	e26b52046ef139bf63509f5b590c18e0_3790	935e3caf510be0c503c97acef35381b2_121	36ade0437952544bcc39850c777ef069_4044	S_aureus_9_01955
WP_000290397.1		aldehyde dehydrogenase family protein	4	4	1	6	2574				1487	1487	1487	e26b52046ef139bf63509f5b590c18e0_219	935e3caf510be0c503c97acef35381b2_3873	36ade0437952544bcc39850c777ef069_251	S_aureus_9_00918
WP_000163829.1		PepSY domain-containing protein	4	4	1	6	1824				311	314	311	e26b52046ef139bf63509f5b590c18e0_3299	935e3caf510be0c503c97acef35381b2_588	36ade0437952544bcc39850c777ef069_3579	S_aureus_9_00334
WP_001280022.1		hypothetical protein	4	4	1	6	1750				929	929	929	e26b52046ef139bf63509f5b590c18e0_3146	935e3caf510be0c503c97acef35381b2_740	36ade0437952544bcc39850c777ef069_3426	S_aureus_9_00267
WP_001249281.1		endonuclease MutS2	4	4	1	6	612				2348	2348	2348	e26b52046ef139bf63509f5b590c18e0_2051	935e3caf510be0c503c97acef35381b2_1966	36ade0437952544bcc39850c777ef069_2303	S_aureus_9_01009
lepB		signal peptidase I	4	4	1	6	1003				524	524	524	e26b52046ef139bf63509f5b590c18e0_1678	935e3caf510be0c503c97acef35381b2_2340	36ade0437952544bcc39850c777ef069_1924	S_aureus_9_00756
yqeH		ribosome biogenesis GTPase YqeH	4	4	1	6	1677				1100	1100	1100	e26b52046ef139bf63509f5b590c18e0_2997	935e3caf510be0c503c97acef35381b2_891	36ade0437952544bcc39850c777ef069_3277	S_aureus_9_00201
WP_000214266.1		prephenate dehydrogenase	4	4	1	6	192				1091	1091	1091	e26b52046ef139bf63509f5b590c18e0_2500	935e3caf510be0c503c97acef35381b2_1501	36ade0437952544bcc39850c777ef069_2802	S_aureus_9_01922
WP_000782121.1		foldase	4	4	1	6	2844				962	962	962	e26b52046ef139bf63509f5b590c18e0_3505	935e3caf510be0c503c97acef35381b2_368	36ade0437952544bcc39850c777ef069_3795	S_aureus_9_02241
miaA		tRNA (adenosine(37)-N6)-dimethylallyltransferase MiaA	4	4	1	6	268				935	935	935	e26b52046ef139bf63509f5b590c18e0_2378	935e3caf510be0c503c97acef35381b2_1639	36ade0437952544bcc39850c777ef069_2628	S_aureus_9_02352
WP_223181134.1		CAP domain-containing protein	4	4	1	6	219				863	977	948	e26b52046ef139bf63509f5b590c18e0_2446	935e3caf510be0c503c97acef35381b2_1555	36ade0437952544bcc39850c777ef069_2748	S_aureus_9_01897
WP_000548700.1		ABC transporter permease	4	4	1	6	409				1232	1232	1232	e26b52046ef139bf63509f5b590c18e0_4643	935e3caf510be0c503c97acef35381b2_4989	36ade0437952544bcc39850c777ef069_4838	S_aureus_9_01752
WP_000779136.1		DUF3147 family protein	4	4	1	6	2380				395	395	395	e26b52046ef139bf63509f5b590c18e0_5415	935e3caf510be0c503c97acef35381b2_4233	36ade0437952544bcc39850c777ef069_5598	S_aureus_9_01364
thiE		thiamine phosphate synthase	4	4	1	6	2899				641	641	641	e26b52046ef139bf63509f5b590c18e0_4119	935e3caf510be0c503c97acef35381b2_5506	36ade0437952544bcc39850c777ef069_4311	S_aureus_9_01436
WP_000467633.1		GNAT family N-acetyltransferase	4	4	1	6	2736				545	545	545	e26b52046ef139bf63509f5b590c18e0_563	935e3caf510be0c503c97acef35381b2_3509	36ade0437952544bcc39850c777ef069_607	S_aureus_9_01568
aur		zinc metalloproteinase aureolysin	4	4	1	6	3071				1529	1529	1529	e26b52046ef139bf63509f5b590c18e0_5275	935e3caf510be0c503c97acef35381b2_4365	36ade0437952544bcc39850c777ef069_5458	S_aureus_9_00599
vraG		ABC transporter permease VraG	4	4	1	6	1975				1889	1889	1889	e26b52046ef139bf63509f5b590c18e0_1243	935e3caf510be0c503c97acef35381b2_2807	36ade0437952544bcc39850c777ef069_1311	S_aureus_9_02012
qoxB		cytochrome aa3 quinol oxidase subunit I	4	4	1	6	710				1988	1988	1988	e26b52046ef139bf63509f5b590c18e0_1880	935e3caf510be0c503c97acef35381b2_2137	36ade0437952544bcc39850c777ef069_2128	S_aureus_9_01090
WP_000525103.1		ABC-F family ATP-binding cassette domain-containing protein	4	4	1	6	1086				1877	1883	1881	e26b52046ef139bf63509f5b590c18e0_1361	935e3caf510be0c503c97acef35381b2_2689	36ade0437952544bcc39850c777ef069_1429	S_aureus_9_01259
opuCB		ABC transporter permease	4	4	1	6	2996				635	635	635	e26b52046ef139bf63509f5b590c18e0_4863	935e3caf510be0c503c97acef35381b2_4765	36ade0437952544bcc39850c777ef069_5058	S_aureus_9_00414
WP_001103743.1		aquaporin family protein	4	4	1	6	271				818	818	818	e26b52046ef139bf63509f5b590c18e0_2370	935e3caf510be0c503c97acef35381b2_1647	36ade0437952544bcc39850c777ef069_2620	S_aureus_9_02348
WP_000246909.1		YneF family protein	4	4	1	6	214				242	287	253	e26b52046ef139bf63509f5b590c18e0_2456	935e3caf510be0c503c97acef35381b2_1545	36ade0437952544bcc39850c777ef069_2758	S_aureus_9_01902
WP_000348303.1		DNA-3-methyladenine glycosylase	4	4	1	6	412				608	608	608	e26b52046ef139bf63509f5b590c18e0_4649	935e3caf510be0c503c97acef35381b2_4983	36ade0437952544bcc39850c777ef069_4844	S_aureus_9_01755
WP_001051556.1		SRPBCC domain-containing protein	4	4	1	6	394				506	506	506	e26b52046ef139bf63509f5b590c18e0_4610	935e3caf510be0c503c97acef35381b2_5020	36ade0437952544bcc39850c777ef069_4807	S_aureus_9_01738
WP_000817956.1		ABC transporter ATP-binding protein/permease	4	4	1	6	1994				1727	1727	1727	e26b52046ef139bf63509f5b590c18e0_1205	935e3caf510be0c503c97acef35381b2_2845	36ade0437952544bcc39850c777ef069_1273	S_aureus_9_02030
WP_000743714.1		ECF-type riboflavin transporter substrate-binding protein	4	4	1	6	2358				554	554	554	e26b52046ef139bf63509f5b590c18e0_5369	935e3caf510be0c503c97acef35381b2_4271	36ade0437952544bcc39850c777ef069_5550	S_aureus_9_01341
WP_001031978.1		polyisoprenyl-teichoic acid--peptidoglycan teichoic acid transferase	4	4	1	6	706				1217	1217	1217	e26b52046ef139bf63509f5b590c18e0_1872	935e3caf510be0c503c97acef35381b2_2145	36ade0437952544bcc39850c777ef069_2120	S_aureus_9_01094
femA		glycine glycyltransferase FemA	4	4	1	6	183				1262	1262	1262	e26b52046ef139bf63509f5b590c18e0_2518	935e3caf510be0c503c97acef35381b2_1483	36ade0437952544bcc39850c777ef069_2820	S_aureus_9_01931
alaS		alanine--tRNA ligase	4	4	1	6	1697				2630	2633	2630	e26b52046ef139bf63509f5b590c18e0_3035	935e3caf510be0c503c97acef35381b2_851	36ade0437952544bcc39850c777ef069_3315	S_aureus_9_00220
rsgA		ribosome small subunit-dependent GTPase A	4	4	1	6	490				875	875	875	e26b52046ef139bf63509f5b590c18e0_2212	935e3caf510be0c503c97acef35381b2_1805	36ade0437952544bcc39850c777ef069_2464	S_aureus_9_00677
WP_000570075.1		ABC transporter ATP-binding protein	4	4	1	6	2684				659	659	659	e26b52046ef139bf63509f5b590c18e0_441	935e3caf510be0c503c97acef35381b2_3643	36ade0437952544bcc39850c777ef069_477	S_aureus_9_01188
WP_000809512.1		pyruvate carboxylase	4	4	1	6	642				3452	3461	3454	e26b52046ef139bf63509f5b590c18e0_1991	935e3caf510be0c503c97acef35381b2_2026	36ade0437952544bcc39850c777ef069_2243	S_aureus_9_01038
WP_000362978.1		alpha/beta hydrolase	4	4	1	6	2023				800	800	800	e26b52046ef139bf63509f5b590c18e0_1147	935e3caf510be0c503c97acef35381b2_2903	36ade0437952544bcc39850c777ef069_1215	S_aureus_9_02059
nreC		nitrate respiration regulation response regulator NreC	4	4	1	6	36				653	653	653	e26b52046ef139bf63509f5b590c18e0_4741	935e3caf510be0c503c97acef35381b2_4887	36ade0437952544bcc39850c777ef069_4934	S_aureus_9_00358
pfkA		6-phosphofructokinase	4	4	1	6	1772				968	968	968	e26b52046ef139bf63509f5b590c18e0_3193	935e3caf510be0c503c97acef35381b2_694	36ade0437952544bcc39850c777ef069_3473	S_aureus_9_00288
narG		nitrate reductase subunit alpha	4	4	1	6	42				3689	3689	3689	e26b52046ef139bf63509f5b590c18e0_4753	935e3caf510be0c503c97acef35381b2_4875	36ade0437952544bcc39850c777ef069_4946	S_aureus_9_00364
WP_001283612.1		redox-sensing transcriptional repressor Rex	4	4	1	6	577				635	635	635	e26b52046ef139bf63509f5b590c18e0_4010	935e3caf510be0c503c97acef35381b2_5615	36ade0437952544bcc39850c777ef069_4196	S_aureus_9_01699
WP_000146745.1		GNAT family N-acetyltransferase	4	4	1	6	349				770	770	770	e26b52046ef139bf63509f5b590c18e0_4520	935e3caf510be0c503c97acef35381b2_5110	36ade0437952544bcc39850c777ef069_4717	S_aureus_9_01864
WP_000915155.1		DUF3899 domain-containing protein	4	4	1	6	983				371	371	371	e26b52046ef139bf63509f5b590c18e0_1718	935e3caf510be0c503c97acef35381b2_2300	36ade0437952544bcc39850c777ef069_1966	S_aureus_9_02072
WP_000738250.1		HlyD family efflux transporter periplasmic adaptor subunit	4	4	1	6	421				647	647	647	e26b52046ef139bf63509f5b590c18e0_4667	935e3caf510be0c503c97acef35381b2_4965	36ade0437952544bcc39850c777ef069_4862	S_aureus_9_01764
WP_000161536.1		D-lactate dehydrogenase	4	4	1	6	3196				992	992	992	e26b52046ef139bf63509f5b590c18e0_5027	935e3caf510be0c503c97acef35381b2_4615	36ade0437952544bcc39850c777ef069_5208	S_aureus_9_00485
hemC		hydroxymethylbilane synthase	4	4	1	6	1743				926	926	926	e26b52046ef139bf63509f5b590c18e0_3132	935e3caf510be0c503c97acef35381b2_754	36ade0437952544bcc39850c777ef069_3412	S_aureus_9_00261
cozEb		cell elongation protein CozEb	4	4	1	6	198				1148	1208	1193	e26b52046ef139bf63509f5b590c18e0_2488	935e3caf510be0c503c97acef35381b2_1513	36ade0437952544bcc39850c777ef069_2790	S_aureus_9_01916
queG		tRNA epoxyqueuosine(34) reductase QueG	4	4	1	6	2861				1127	1127	1127	e26b52046ef139bf63509f5b590c18e0_3537	935e3caf510be0c503c97acef35381b2_336	36ade0437952544bcc39850c777ef069_3827	S_aureus_9_02256
ilvB		biosynthetic-type acetolactate synthase large subunit	4	4	1	6	586				1769	1769	1769	e26b52046ef139bf63509f5b590c18e0_4030	935e3caf510be0c503c97acef35381b2_5595	36ade0437952544bcc39850c777ef069_4218	S_aureus_9_01707
asp1		accessory Sec system protein Asp1	4	4	1	6	2324				1553	1553	1553	e26b52046ef139bf63509f5b590c18e0_5305	935e3caf510be0c503c97acef35381b2_4335	36ade0437952544bcc39850c777ef069_5488	S_aureus_9_00614
pheS		phenylalanine--tRNA ligase subunit alpha	4	4	1	6	618				1058	1058	1058	e26b52046ef139bf63509f5b590c18e0_2039	935e3caf510be0c503c97acef35381b2_1978	36ade0437952544bcc39850c777ef069_2291	S_aureus_9_01015
recJ		single-stranded-DNA-specific exonuclease RecJ	4	4	1	6	1716				2273	2273	2273	e26b52046ef139bf63509f5b590c18e0_3074	935e3caf510be0c503c97acef35381b2_812	36ade0437952544bcc39850c777ef069_3354	S_aureus_9_00237
pepT		peptidase T	4	4	1	6	1110				1226	1226	1226	e26b52046ef139bf63509f5b590c18e0_1411	935e3caf510be0c503c97acef35381b2_2637	36ade0437952544bcc39850c777ef069_1481	S_aureus_9_01282
WP_000934894.1		thymidylate synthase	4	4	1	6	130				956	956	956	e26b52046ef139bf63509f5b590c18e0_2628	935e3caf510be0c503c97acef35381b2_1368	36ade0437952544bcc39850c777ef069_2928	S_aureus_9_00037
WP_000240920.1		CDP-glycerol glycerophosphotransferase family protein	4	4	1	6	2663				1688	1688	1688	e26b52046ef139bf63509f5b590c18e0_397	935e3caf510be0c503c97acef35381b2_3685	36ade0437952544bcc39850c777ef069_437	S_aureus_9_01169
WP_000148855.1		glucose-6-phosphate isomerase	4	4	1	6	1005				1331	1331	1331	e26b52046ef139bf63509f5b590c18e0_1674	935e3caf510be0c503c97acef35381b2_2344	36ade0437952544bcc39850c777ef069_1920	S_aureus_9_00758
der		ribosome biogenesis GTPase Der	4	4	1	6	1379				1310	1310	1310	e26b52046ef139bf63509f5b590c18e0_2723	935e3caf510be0c503c97acef35381b2_1271	36ade0437952544bcc39850c777ef069_3025	S_aureus_9_00082
trpD		anthranilate phosphoribosyltransferase	4	4	1	6	188				998	998	998	e26b52046ef139bf63509f5b590c18e0_2508	935e3caf510be0c503c97acef35381b2_1493	36ade0437952544bcc39850c777ef069_2810	S_aureus_9_01926
WP_000768192.1		phosphoribosylanthranilate isomerase	4	4	1	6	186				632	635	632	e26b52046ef139bf63509f5b590c18e0_2512	935e3caf510be0c503c97acef35381b2_1489	36ade0437952544bcc39850c777ef069_2814	S_aureus_9_01928
sufB		Fe-S cluster assembly protein SufB	4	4	1	6	1212				1397	1397	1397	e26b52046ef139bf63509f5b590c18e0_1580	935e3caf510be0c503c97acef35381b2_2436	36ade0437952544bcc39850c777ef069_1696	S_aureus_9_00832
group_2062	thiD	bifunctional hydroxymethylpyrimidine kinase/phosphomethylpyrimidine kinase	4	4	1	6	2070				830	830	830	e26b52046ef139bf63509f5b590c18e0_1057	935e3caf510be0c503c97acef35381b2_2991	36ade0437952544bcc39850c777ef069_1129	S_aureus_9_02183
WP_000031274.1		class I SAM-dependent methyltransferase	4	4	1	6	2673				761	761	761	e26b52046ef139bf63509f5b590c18e0_417	935e3caf510be0c503c97acef35381b2_3665	36ade0437952544bcc39850c777ef069_457	S_aureus_9_01179
WP_000274844.1		VOC family protein	4	4	1	6	464				797	797	797	e26b52046ef139bf63509f5b590c18e0_2158	935e3caf510be0c503c97acef35381b2_1859	36ade0437952544bcc39850c777ef069_2410	S_aureus_9_00703
WP_000954654.1		metal-dependent transcriptional regulator	4	4	1	6	2003				644	644	644	e26b52046ef139bf63509f5b590c18e0_1187	935e3caf510be0c503c97acef35381b2_2863	36ade0437952544bcc39850c777ef069_1255	S_aureus_9_02039
betB		betaine-aldehyde dehydrogenase	4	4	1	6	3104				1490	1490	1490	e26b52046ef139bf63509f5b590c18e0_5207	935e3caf510be0c503c97acef35381b2_4431	36ade0437952544bcc39850c777ef069_5390	S_aureus_9_00573
WP_000049484.1		metallophosphoesterase	4	4	1	6	604				503	503	503	e26b52046ef139bf63509f5b590c18e0_2069	935e3caf510be0c503c97acef35381b2_1948	36ade0437952544bcc39850c777ef069_2321	S_aureus_9_01001
WP_001068497.1		DMT family transporter	4	4	1	6	1095				866	866	866	e26b52046ef139bf63509f5b590c18e0_1381	935e3caf510be0c503c97acef35381b2_2667	36ade0437952544bcc39850c777ef069_1451	S_aureus_9_01268
yheS		ABC-F family ATP-binding cassette domain-containing protein	4	4	1	6	578				1928	1928	1928	e26b52046ef139bf63509f5b590c18e0_4012	935e3caf510be0c503c97acef35381b2_5613	36ade0437952544bcc39850c777ef069_4198	S_aureus_9_01700
trpC		indole-3-glycerol phosphate synthase TrpC	4	4	1	6	187				782	782	782	e26b52046ef139bf63509f5b590c18e0_2510	935e3caf510be0c503c97acef35381b2_1491	36ade0437952544bcc39850c777ef069_2812	S_aureus_9_01927
pnp		polyribonucleotide nucleotidyltransferase	4	4	1	6	295				2096	2096	2096	e26b52046ef139bf63509f5b590c18e0_2322	935e3caf510be0c503c97acef35381b2_1695	36ade0437952544bcc39850c777ef069_2572	S_aureus_9_00626
carB		carbamoyl-phosphate synthase large subunit	4	4	1	6	472				3173	3173	3173	e26b52046ef139bf63509f5b590c18e0_2176	935e3caf510be0c503c97acef35381b2_1841	36ade0437952544bcc39850c777ef069_2428	S_aureus_9_00695
group_2072	arcC	carbamate kinase	4	4	1	6	339				932	935	932	e26b52046ef139bf63509f5b590c18e0_2103	935e3caf510be0c503c97acef35381b2_1914	36ade0437952544bcc39850c777ef069_2355	S_aureus_9_00732
WP_000160455.1		NAD(P)/FAD-dependent oxidoreductase	4	4	1	6	3150				1493	1493	1493	e26b52046ef139bf63509f5b590c18e0_5115	935e3caf510be0c503c97acef35381b2_4529	36ade0437952544bcc39850c777ef069_5294	S_aureus_9_00527
WP_000403916.1		LysR family transcriptional regulator	4	4	1	6	2182				884	884	884	e26b52046ef139bf63509f5b590c18e0_779	935e3caf510be0c503c97acef35381b2_3281	36ade0437952544bcc39850c777ef069_839	S_aureus_9_02129
WP_000149403.1		formate--tetrahydrofolate ligase	4	4	1	6	1809				1667	1676	1669	e26b52046ef139bf63509f5b590c18e0_3267	935e3caf510be0c503c97acef35381b2_620	36ade0437952544bcc39850c777ef069_3547	S_aureus_9_00320
WP_054193090.1		L-cystine transporter	4	4	1	6	2778				1388	1388	1388	e26b52046ef139bf63509f5b590c18e0_646	935e3caf510be0c503c97acef35381b2_3426	36ade0437952544bcc39850c777ef069_690	S_aureus_9_01525
WP_000362357.1		lipoate--protein ligase family protein	4	4	1	6	2061				836	836	836	e26b52046ef139bf63509f5b590c18e0_1075	935e3caf510be0c503c97acef35381b2_2973	36ade0437952544bcc39850c777ef069_1147	S_aureus_9_02192
leuA_2		2-isopropylmalate synthase	4	4	1	6	589				1529	1529	1529	e26b52046ef139bf63509f5b590c18e0_4036	935e3caf510be0c503c97acef35381b2_5589	36ade0437952544bcc39850c777ef069_4224	S_aureus_9_01710
WP_000936720.1		N-acetylmannosamine-6-phosphate 2-epimerase	4	4	1	6	2712				668	668	668	e26b52046ef139bf63509f5b590c18e0_515	935e3caf510be0c503c97acef35381b2_3557	36ade0437952544bcc39850c777ef069_559	S_aureus_9_01591
WP_000773921.1		ATP-binding cassette domain-containing protein	4	4	1	6	3194				635	635	635	e26b52046ef139bf63509f5b590c18e0_5031	935e3caf510be0c503c97acef35381b2_4611	36ade0437952544bcc39850c777ef069_5212	S_aureus_9_00487
WP_000088431.1		osmotic stress response protein	4	4	1	6	705				470	470	470	e26b52046ef139bf63509f5b590c18e0_1870	935e3caf510be0c503c97acef35381b2_2147	36ade0437952544bcc39850c777ef069_2118	S_aureus_9_01095
lepA		translation elongation factor 4	4	4	1	6	1665				1823	1823	1823	e26b52046ef139bf63509f5b590c18e0_2973	935e3caf510be0c503c97acef35381b2_915	36ade0437952544bcc39850c777ef069_3253	S_aureus_9_00189
WP_001095260.1		transcriptional repressor	4	4	1	6	1635				410	410	410	e26b52046ef139bf63509f5b590c18e0_2913	935e3caf510be0c503c97acef35381b2_977	36ade0437952544bcc39850c777ef069_3193	S_aureus_9_00159
WP_000814094.1		proline--tRNA ligase	4	4	1	6	306				1703	1703	1703	e26b52046ef139bf63509f5b590c18e0_2300	935e3caf510be0c503c97acef35381b2_1717	36ade0437952544bcc39850c777ef069_2550	S_aureus_9_00637
WP_001566903.1		ParB/RepB/Spo0J family partition protein	4	4	1	6	2754				845	845	845	e26b52046ef139bf63509f5b590c18e0_600	935e3caf510be0c503c97acef35381b2_3472	36ade0437952544bcc39850c777ef069_644	S_aureus_9_01549
WP_001223008.1		MBL fold metallo-hydrolase	4	4	1	6	1626				623	623	623	e26b52046ef139bf63509f5b590c18e0_2895	935e3caf510be0c503c97acef35381b2_995	36ade0437952544bcc39850c777ef069_3175	S_aureus_9_00151
WP_000985290.1		peptide deformylase	4	4	1	6	484				488	488	488	e26b52046ef139bf63509f5b590c18e0_2200	935e3caf510be0c503c97acef35381b2_1817	36ade0437952544bcc39850c777ef069_2452	S_aureus_9_00683
pdhA		pyruvate dehydrogenase (acetyl-transferring) E1 component subunit alpha	4	4	1	6	663				1112	1112	1112	e26b52046ef139bf63509f5b590c18e0_1949	935e3caf510be0c503c97acef35381b2_2068	36ade0437952544bcc39850c777ef069_2201	S_aureus_9_01058
WP_000590846.1		ABC transporter ATP-binding protein	4	4	1	6	2577				740	740	740	e26b52046ef139bf63509f5b590c18e0_227	935e3caf510be0c503c97acef35381b2_3865	36ade0437952544bcc39850c777ef069_259	S_aureus_9_00914
tdcB		bifunctional threonine ammonia-lyase/L-serine ammonia-lyase TdcB	4	4	1	6	119				1040	1040	1040	e26b52046ef139bf63509f5b590c18e0_2648	935e3caf510be0c503c97acef35381b2_1346	36ade0437952544bcc39850c777ef069_2950	S_aureus_9_00046
WP_000567017.1		tetratricopeptide repeat protein	4	4	1	6	1699				668	668	668	e26b52046ef139bf63509f5b590c18e0_3039	935e3caf510be0c503c97acef35381b2_847	36ade0437952544bcc39850c777ef069_3319	S_aureus_9_00222
def		peptide deformylase	4	4	1	6	665				551	551	551	e26b52046ef139bf63509f5b590c18e0_1945	935e3caf510be0c503c97acef35381b2_2072	36ade0437952544bcc39850c777ef069_2197	S_aureus_9_01060
WP_000660709.1		MFS transporter	4	4	1	6	3211				1277	1277	1277	e26b52046ef139bf63509f5b590c18e0_5001	935e3caf510be0c503c97acef35381b2_4639	36ade0437952544bcc39850c777ef069_5178	S_aureus_9_00471
trmB		tRNA (guanosine(46)-N7)-methyltransferase TrmB	4	4	1	6	1826				644	644	644	e26b52046ef139bf63509f5b590c18e0_3303	935e3caf510be0c503c97acef35381b2_584	36ade0437952544bcc39850c777ef069_3583	S_aureus_9_00336
hslO		Hsp33 family molecular chaperone HslO	4	4	1	6	2139				881	881	881	e26b52046ef139bf63509f5b590c18e0_882	935e3caf510be0c503c97acef35381b2_3178	36ade0437952544bcc39850c777ef069_942	S_aureus_9_02390
WP_001031880.1		L-lactate dehydrogenase	4	4	1	6	2647				953	953	953	e26b52046ef139bf63509f5b590c18e0_363	935e3caf510be0c503c97acef35381b2_3719	36ade0437952544bcc39850c777ef069_403	S_aureus_9_01153
WP_000095328.1		adenylosuccinate synthase	4	4	1	6	2404				1283	1283	1283	e26b52046ef139bf63509f5b590c18e0_37	935e3caf510be0c503c97acef35381b2_4183	36ade0437952544bcc39850c777ef069_37	S_aureus_9_01388
WP_001270834.1		NAD kinase	4	4	1	6	2952				809	809	809	e26b52046ef139bf63509f5b590c18e0_1760	935e3caf510be0c503c97acef35381b2_2258	36ade0437952544bcc39850c777ef069_2012	S_aureus_9_02093
WP_000163283.1		type 1 glutamine amidotransferase	4	4	1	6	1523				515	515	515	e26b52046ef139bf63509f5b590c18e0_3672	935e3caf510be0c503c97acef35381b2_205	36ade0437952544bcc39850c777ef069_3960	S_aureus_9_01994
WP_000472246.1		ABC transporter permease	4	4	1	6	3020				935	935	935	e26b52046ef139bf63509f5b590c18e0_4903	935e3caf510be0c503c97acef35381b2_4725	36ade0437952544bcc39850c777ef069_5098	S_aureus_9_00432
WP_000908956.1		hypothetical protein	4	4	1	6	2497				602	602	602	e26b52046ef139bf63509f5b590c18e0_79	935e3caf510be0c503c97acef35381b2_4027	36ade0437952544bcc39850c777ef069_95	S_aureus_9_00993
WP_000999169.1		YppE family protein	4	4	1	6	1351				350	401	362	e26b52046ef139bf63509f5b590c18e0_2669	935e3caf510be0c503c97acef35381b2_1325	36ade0437952544bcc39850c777ef069_2971	S_aureus_9_00056
mfd		transcription-repair coupling factor	4	4	1	6	2148				3506	3506	3506	e26b52046ef139bf63509f5b590c18e0_864	935e3caf510be0c503c97acef35381b2_3196	36ade0437952544bcc39850c777ef069_924	S_aureus_9_02399
WP_000923523.1		ATP-binding cassette domain-containing protein	4	4	1	6	3007				662	662	662	e26b52046ef139bf63509f5b590c18e0_4881	935e3caf510be0c503c97acef35381b2_4747	36ade0437952544bcc39850c777ef069_5076	S_aureus_9_00421
WP_000473652.1		PTS glucose transporter subunit IIA	4	4	1	6	135				500	500	500	e26b52046ef139bf63509f5b590c18e0_2618	935e3caf510be0c503c97acef35381b2_1378	36ade0437952544bcc39850c777ef069_2918	S_aureus_9_00032
queF		preQ(1) synthase	4	4	1	6	1094				500	500	500	e26b52046ef139bf63509f5b590c18e0_1379	935e3caf510be0c503c97acef35381b2_2669	36ade0437952544bcc39850c777ef069_1449	S_aureus_9_01267
moaA		GTP 3',8-cyclase MoaA	4	4	1	6	762				1022	1022	1022	e26b52046ef139bf63509f5b590c18e0_4494	935e3caf510be0c503c97acef35381b2_5136	36ade0437952544bcc39850c777ef069_4691	S_aureus_9_01851
WP_001159898.1		GRP family sugar transporter	4	4	1	6	775				863	863	863	e26b52046ef139bf63509f5b590c18e0_4468	935e3caf510be0c503c97acef35381b2_5162	36ade0437952544bcc39850c777ef069_4663	S_aureus_9_01840
WP_001245768.1		ABC transporter permease	4	4	1	6	2839				1223	1223	1223	e26b52046ef139bf63509f5b590c18e0_3495	935e3caf510be0c503c97acef35381b2_378	36ade0437952544bcc39850c777ef069_3785	S_aureus_9_02236
WP_000448078.1		glutathione peroxidase	4	4	1	6	266				476	476	476	e26b52046ef139bf63509f5b590c18e0_2382	935e3caf510be0c503c97acef35381b2_1635	36ade0437952544bcc39850c777ef069_2632	S_aureus_9_02354
WP_001177828.1		prephenate dehydratase	4	4	1	6	1480				794	794	794	e26b52046ef139bf63509f5b590c18e0_3794	935e3caf510be0c503c97acef35381b2_117	36ade0437952544bcc39850c777ef069_4048	S_aureus_9_01953
sspC		staphostatin B	4	4	1	6	697				329	329	329	e26b52046ef139bf63509f5b590c18e0_1852	935e3caf510be0c503c97acef35381b2_2165	36ade0437952544bcc39850c777ef069_2100	S_aureus_9_01103
WP_000182026.1		hypothetical protein	4	4	1	6	1355				341	341	341	e26b52046ef139bf63509f5b590c18e0_2677	935e3caf510be0c503c97acef35381b2_1317	36ade0437952544bcc39850c777ef069_2979	S_aureus_9_00059
sfaC		staphyloferrin A biosynthesis protein SfaC	4	4	1	6	848				1070	1070	1070	e26b52046ef139bf63509f5b590c18e0_4324	935e3caf510be0c503c97acef35381b2_5306	36ade0437952544bcc39850c777ef069_4517	S_aureus_9_02321
WP_000754443.1		siderophore ABC transporter substrate-binding protein	4	4	1	6	1103				1028	1028	1028	e26b52046ef139bf63509f5b590c18e0_1397	935e3caf510be0c503c97acef35381b2_2651	36ade0437952544bcc39850c777ef069_1467	S_aureus_9_01275
kdpD		sensor histidine kinase KdpD	4	4	1	6	2911				2657	2657	2657	e26b52046ef139bf63509f5b590c18e0_4095	935e3caf510be0c503c97acef35381b2_5530	36ade0437952544bcc39850c777ef069_4287	S_aureus_9_01424
mobA		molybdenum cofactor guanylyltransferase MobA	4	4	1	6	761				599	599	599	e26b52046ef139bf63509f5b590c18e0_4496	935e3caf510be0c503c97acef35381b2_5134	36ade0437952544bcc39850c777ef069_4693	S_aureus_9_01852
WP_000685067.1		class I SAM-dependent rRNA methyltransferase	4	4	1	6	731				1172	1172	1172	e26b52046ef139bf63509f5b590c18e0_1923	935e3caf510be0c503c97acef35381b2_2094	36ade0437952544bcc39850c777ef069_2171	S_aureus_9_01070
serA		phosphoglycerate dehydrogenase	4	4	1	6	1797				1604	1604	1604	e26b52046ef139bf63509f5b590c18e0_3245	935e3caf510be0c503c97acef35381b2_642	36ade0437952544bcc39850c777ef069_3525	S_aureus_9_00312
ltaS		polyglycerol-phosphate lipoteichoic acid synthase LtaS	4	4	1	6	1085				1940	1940	1940	e26b52046ef139bf63509f5b590c18e0_1359	935e3caf510be0c503c97acef35381b2_2691	36ade0437952544bcc39850c777ef069_1427	S_aureus_9_01258
WP_000767028.1		dihydroorotase	4	4	1	6	470				1274	1277	1274	e26b52046ef139bf63509f5b590c18e0_2172	935e3caf510be0c503c97acef35381b2_1845	36ade0437952544bcc39850c777ef069_2424	S_aureus_9_00697
WP_001091387.1		DUF1444 domain-containing protein	4	4	1	6	1821				857	857	857	e26b52046ef139bf63509f5b590c18e0_3293	935e3caf510be0c503c97acef35381b2_594	36ade0437952544bcc39850c777ef069_3573	S_aureus_9_00331
asp2		accessory Sec system protein Asp2	4	4	1	6	2323				1568	1571	1568	e26b52046ef139bf63509f5b590c18e0_5303	935e3caf510be0c503c97acef35381b2_4337	36ade0437952544bcc39850c777ef069_5486	S_aureus_9_00613
WP_031774998.1		zinc metallopeptidase	4	4	1	6	1364				680	698	684	e26b52046ef139bf63509f5b590c18e0_2695	935e3caf510be0c503c97acef35381b2_1299	36ade0437952544bcc39850c777ef069_2997	S_aureus_9_00068
yveA		APC family permease	4	4	1	6	3003				1637	1637	1637	e26b52046ef139bf63509f5b590c18e0_4873	935e3caf510be0c503c97acef35381b2_4755	36ade0437952544bcc39850c777ef069_5068	S_aureus_9_00417
WP_001028376.1		PIN/TRAM domain-containing protein	4	4	1	6	2123				1073	1073	1073	e26b52046ef139bf63509f5b590c18e0_950	935e3caf510be0c503c97acef35381b2_3098	36ade0437952544bcc39850c777ef069_1022	S_aureus_9_02269
metK		methionine adenosyltransferase	4	4	1	6	1865				1193	1193	1193	e26b52046ef139bf63509f5b590c18e0_3384	935e3caf510be0c503c97acef35381b2_509	36ade0437952544bcc39850c777ef069_3656	S_aureus_9_02444
purQ		phosphoribosylformylglycinamidine synthase I	4	4	1	6	719				671	671	671	e26b52046ef139bf63509f5b590c18e0_1898	935e3caf510be0c503c97acef35381b2_2119	36ade0437952544bcc39850c777ef069_2146	S_aureus_9_01082
fmt		methionyl-tRNA formyltransferase	4	4	1	6	485				935	935	935	e26b52046ef139bf63509f5b590c18e0_2202	935e3caf510be0c503c97acef35381b2_1815	36ade0437952544bcc39850c777ef069_2454	S_aureus_9_00682
metG		methionine--tRNA ligase	4	4	1	6	2161				1973	1973	1973	e26b52046ef139bf63509f5b590c18e0_836	935e3caf510be0c503c97acef35381b2_3224	36ade0437952544bcc39850c777ef069_896	S_aureus_9_02412
WP_111688695.1		Crp/Fnr family transcriptional regulator	4	4	1	6	3078				704	704	704	e26b52046ef139bf63509f5b590c18e0_5261	935e3caf510be0c503c97acef35381b2_4379	36ade0437952544bcc39850c777ef069_5444	S_aureus_9_00593
WP_064136728.1		glutamate-1-semialdehyde 2,1-aminomutase	4	4	1	6	1534				1289	1289	1289	e26b52046ef139bf63509f5b590c18e0_3648	935e3caf510be0c503c97acef35381b2_229	36ade0437952544bcc39850c777ef069_3936	S_aureus_9_02005
rsp		AraC family transcriptional regulator Rsp	4	4	1	6	28				2105	2105	2105	e26b52046ef139bf63509f5b590c18e0_4725	935e3caf510be0c503c97acef35381b2_4907	36ade0437952544bcc39850c777ef069_4918	S_aureus_9_01790
WP_000342126.1		S41 family peptidase	4	4	1	6	137				1490	1490	1490	e26b52046ef139bf63509f5b590c18e0_2614	935e3caf510be0c503c97acef35381b2_1382	36ade0437952544bcc39850c777ef069_2914	S_aureus_9_00030
WP_000154680.1		DUF1405 domain-containing protein	4	4	1	6	1365				587	587	587	e26b52046ef139bf63509f5b590c18e0_2697	935e3caf510be0c503c97acef35381b2_1297	36ade0437952544bcc39850c777ef069_2999	S_aureus_9_00069
dnaG		DNA primase	4	4	1	6	1643				1799	1817	1812	e26b52046ef139bf63509f5b590c18e0_2929	935e3caf510be0c503c97acef35381b2_961	36ade0437952544bcc39850c777ef069_3209	S_aureus_9_00167
WP_000616885.1		phosphomevalonate kinase	4	4	1	6	2058				1076	1076	1076	e26b52046ef139bf63509f5b590c18e0_1081	935e3caf510be0c503c97acef35381b2_2967	36ade0437952544bcc39850c777ef069_1153	S_aureus_9_02195
tsaB		tRNA (adenosine(37)-N6)-threonylcarbamoyltransferase complex dimerization subunit type 1 TsaB	4	4	1	6	583				662	662	662	e26b52046ef139bf63509f5b590c18e0_4022	935e3caf510be0c503c97acef35381b2_5603	36ade0437952544bcc39850c777ef069_4210	S_aureus_9_01704
rpoC		DNA-directed RNA polymerase subunit beta'	4	4	1	6	2106				3596	3623	3602	e26b52046ef139bf63509f5b590c18e0_985	935e3caf510be0c503c97acef35381b2_3063	36ade0437952544bcc39850c777ef069_1057	S_aureus_9_02285
WP_000788441.1		hypothetical protein	4	4	1	6	780				389	389	389	e26b52046ef139bf63509f5b590c18e0_4458	935e3caf510be0c503c97acef35381b2_5172	36ade0437952544bcc39850c777ef069_4653	S_aureus_9_01836
WP_001167828.1		N-acetyltransferase	4	4	1	6	2176				524	524	524	e26b52046ef139bf63509f5b590c18e0_799	935e3caf510be0c503c97acef35381b2_3261	36ade0437952544bcc39850c777ef069_859	S_aureus_9_02122
cysK		cysteine synthase A	4	4	1	6	2138				932	932	932	e26b52046ef139bf63509f5b590c18e0_884	935e3caf510be0c503c97acef35381b2_3176	36ade0437952544bcc39850c777ef069_944	S_aureus_9_02389
WP_000831496.1		DUF2294 domain-containing protein	4	4	1	6	2199				362	362	362	e26b52046ef139bf63509f5b590c18e0_745	935e3caf510be0c503c97acef35381b2_3315	36ade0437952544bcc39850c777ef069_805	S_aureus_9_02144
WP_000120549.1		DUF2750 domain-containing protein	4	4	1	6	70				671	671	671	e26b52046ef139bf63509f5b590c18e0_4200	935e3caf510be0c503c97acef35381b2_5425	36ade0437952544bcc39850c777ef069_4392	S_aureus_9_01475
acsA		acetate--CoA ligase	4	4	1	6	1810				1706	1706	1706	e26b52046ef139bf63509f5b590c18e0_3269	935e3caf510be0c503c97acef35381b2_618	36ade0437952544bcc39850c777ef069_3549	S_aureus_9_00321
WP_000005212.1		YpiB family protein	4	4	1	6	1366				575	587	578	e26b52046ef139bf63509f5b590c18e0_2699	935e3caf510be0c503c97acef35381b2_1295	36ade0437952544bcc39850c777ef069_3001	S_aureus_9_00070
WP_054193023.1		AraC family transcriptional regulator	4	4	1	6	365				1955	1955	1955	e26b52046ef139bf63509f5b590c18e0_4552	935e3caf510be0c503c97acef35381b2_5078	36ade0437952544bcc39850c777ef069_4749	S_aureus_9_01880
WP_001024035.1		hypothetical protein	4	4	1	6	74				350	350	350	e26b52046ef139bf63509f5b590c18e0_4208	935e3caf510be0c503c97acef35381b2_5417	36ade0437952544bcc39850c777ef069_4400	S_aureus_9_01479
WP_000123402.1		EVE domain-containing protein	4	4	1	6	80				1373	1373	1373	e26b52046ef139bf63509f5b590c18e0_4220	935e3caf510be0c503c97acef35381b2_5405	36ade0437952544bcc39850c777ef069_4412	S_aureus_9_01485
WP_000592317.1		efflux RND transporter permease subunit	4	4	1	6	770				3167	3167	3167	e26b52046ef139bf63509f5b590c18e0_4478	935e3caf510be0c503c97acef35381b2_5152	36ade0437952544bcc39850c777ef069_4675	S_aureus_9_01844
WP_000620870.1		alpha/beta hydrolase	4	4	1	6	418				920	920	920	e26b52046ef139bf63509f5b590c18e0_4661	935e3caf510be0c503c97acef35381b2_4971	36ade0437952544bcc39850c777ef069_4856	S_aureus_9_01761
mraY		phospho-N-acetylmuramoyl-pentapeptide-transferase	4	4	1	6	452				965	965	965	e26b52046ef139bf63509f5b590c18e0_2134	935e3caf510be0c503c97acef35381b2_1883	36ade0437952544bcc39850c777ef069_2386	S_aureus_9_00715
WP_000347058.1		MFS transporter	4	4	1	6	2076				1400	1400	1400	e26b52046ef139bf63509f5b590c18e0_1045	935e3caf510be0c503c97acef35381b2_3003	36ade0437952544bcc39850c777ef069_1117	S_aureus_9_02177
WP_111688610.1		ABC transporter ATP-binding protein	4	4	1	6	977				986	986	986	e26b52046ef139bf63509f5b590c18e0_1732	935e3caf510be0c503c97acef35381b2_2286	36ade0437952544bcc39850c777ef069_1980	S_aureus_9_02079
recA		recombinase RecA	4	4	1	6	284				1043	1043	1043	e26b52046ef139bf63509f5b590c18e0_2344	935e3caf510be0c503c97acef35381b2_1673	36ade0437952544bcc39850c777ef069_2594	S_aureus_9_02335
WP_000749057.1		ABC transporter substrate-binding protein	4	4	1	6	2026				887	887	887	e26b52046ef139bf63509f5b590c18e0_1141	935e3caf510be0c503c97acef35381b2_2909	36ade0437952544bcc39850c777ef069_1209	S_aureus_9_02062
aroA		3-phosphoshikimate 1-carboxyvinyltransferase	4	4	1	6	1369				1298	1298	1298	e26b52046ef139bf63509f5b590c18e0_2703	935e3caf510be0c503c97acef35381b2_1291	36ade0437952544bcc39850c777ef069_3005	S_aureus_9_00072
WP_000238230.1		exonuclease SbcCD subunit D	4	4	1	6	2848				1196	1196	1196	e26b52046ef139bf63509f5b590c18e0_3511	935e3caf510be0c503c97acef35381b2_362	36ade0437952544bcc39850c777ef069_3801	S_aureus_9_02244
WP_000737196.1		EfeM/EfeO family lipoprotein	4	4	1	6	2737				854	854	854	e26b52046ef139bf63509f5b590c18e0_565	935e3caf510be0c503c97acef35381b2_3507	36ade0437952544bcc39850c777ef069_609	S_aureus_9_01567
WP_000615461.1		amino acid ABC transporter ATP-binding protein	4	4	1	6	2959				731	731	731	e26b52046ef139bf63509f5b590c18e0_4787	935e3caf510be0c503c97acef35381b2_4841	36ade0437952544bcc39850c777ef069_4982	S_aureus_9_00379
sarS		HTH-type transcriptional regulator SarS	4	4	1	6	2520				752	752	752	e26b52046ef139bf63509f5b590c18e0_115	935e3caf510be0c503c97acef35381b2_3991	36ade0437952544bcc39850c777ef069_137	S_aureus_9_00975
WP_000323441.1		esterase family protein	4	4	1	6	3080				761	761	761	e26b52046ef139bf63509f5b590c18e0_5257	935e3caf510be0c503c97acef35381b2_4383	36ade0437952544bcc39850c777ef069_5440	S_aureus_9_00591
icaA		poly-beta-1,6 N-acetyl-D-glucosamine synthase	4	4	1	6	2338				1238	1238	1238	e26b52046ef139bf63509f5b590c18e0_5333	935e3caf510be0c503c97acef35381b2_4307	36ade0437952544bcc39850c777ef069_5516	S_aureus_9_01322
gcvH		glycine cleavage system protein GcvH	4	4	1	6	1199				380	380	380	e26b52046ef139bf63509f5b590c18e0_1555	935e3caf510be0c503c97acef35381b2_2465	36ade0437952544bcc39850c777ef069_1669	S_aureus_9_00846
WP_000972699.1		DeoR/GlpR family DNA-binding transcription regulator	4	4	1	6	1938				764	764	764	e26b52046ef139bf63509f5b590c18e0_1317	935e3caf510be0c503c97acef35381b2_2733	36ade0437952544bcc39850c777ef069_1385	S_aureus_9_01238
WP_000523158.1		M20 peptidase aminoacylase family protein	4	4	1	6	398				1121	1121	1121	e26b52046ef139bf63509f5b590c18e0_4619	935e3caf510be0c503c97acef35381b2_5011	36ade0437952544bcc39850c777ef069_4816	S_aureus_9_01742
isdF		hemin ABC transporter permease protein IsdF	4	4	1	6	623				965	968	965	e26b52046ef139bf63509f5b590c18e0_2029	935e3caf510be0c503c97acef35381b2_1988	36ade0437952544bcc39850c777ef069_2281	S_aureus_9_01019
gdpP		cyclic-di-AMP phosphodiesterase GdpP	4	4	1	6	2401				1967	1967	1967	e26b52046ef139bf63509f5b590c18e0_31	935e3caf510be0c503c97acef35381b2_4189	36ade0437952544bcc39850c777ef069_31	S_aureus_9_01385
WP_000706519.1		GTP-binding protein	4	4	1	6	3133				890	890	890	e26b52046ef139bf63509f5b590c18e0_5149	935e3caf510be0c503c97acef35381b2_4493	36ade0437952544bcc39850c777ef069_5330	S_aureus_9_00544
WP_000659770.1		formate/nitrite transporter family protein	4	4	1	6	2698				824	824	824	e26b52046ef139bf63509f5b590c18e0_487	935e3caf510be0c503c97acef35381b2_3585	36ade0437952544bcc39850c777ef069_531	S_aureus_9_01604
WP_000071904.1		pyridoxamine 5'-phosphate oxidase family protein	4	4	1	6	29				422	422	422	e26b52046ef139bf63509f5b590c18e0_4727	935e3caf510be0c503c97acef35381b2_4905	36ade0437952544bcc39850c777ef069_4920	S_aureus_9_01791
mutM		bifunctional DNA-formamidopyrimidine glycosylase/DNA-(apurinic or apyrimidinic site) lyase	4	4	1	6	1763				872	872	872	e26b52046ef139bf63509f5b590c18e0_3173	935e3caf510be0c503c97acef35381b2_712	36ade0437952544bcc39850c777ef069_3453	S_aureus_9_00279
WP_000525078.1		ATP-dependent helicase DinG	4	4	1	6	1359				2693	2693	2693	e26b52046ef139bf63509f5b590c18e0_2685	935e3caf510be0c503c97acef35381b2_1309	36ade0437952544bcc39850c777ef069_2987	S_aureus_9_00063
WP_001293306.1		GntR family transcriptional regulator	4	4	1	6	292				713	713	713	e26b52046ef139bf63509f5b590c18e0_2328	935e3caf510be0c503c97acef35381b2_1689	36ade0437952544bcc39850c777ef069_2578	S_aureus_9_00623
queA		tRNA preQ1(34) S-adenosylmethionine ribosyltransferase-isomerase QueA	4	4	1	6	1720				1025	1025	1025	e26b52046ef139bf63509f5b590c18e0_3082	935e3caf510be0c503c97acef35381b2_804	36ade0437952544bcc39850c777ef069_3362	S_aureus_9_00241
WP_001074749.1		phosphoglycerate kinase	4	4	1	6	1145				1190	1190	1190	e26b52046ef139bf63509f5b590c18e0_1478	935e3caf510be0c503c97acef35381b2_2572	36ade0437952544bcc39850c777ef069_1546	S_aureus_9_00881
WP_000020346.1		CinA family nicotinamide mononucleotide deamidase-related protein	4	4	1	6	285				1151	1151	1151	e26b52046ef139bf63509f5b590c18e0_2342	935e3caf510be0c503c97acef35381b2_1675	36ade0437952544bcc39850c777ef069_2592	S_aureus_9_02334
aroC		chorismate synthase	4	4	1	6	1371				1166	1166	1166	e26b52046ef139bf63509f5b590c18e0_2707	935e3caf510be0c503c97acef35381b2_1287	36ade0437952544bcc39850c777ef069_3009	S_aureus_9_00074
cap8C		type 8 capsular polysaccharide synthesis protein Cap8C	4	4	1	6	2562				764	764	764	e26b52046ef139bf63509f5b590c18e0_195	935e3caf510be0c503c97acef35381b2_3905	36ade0437952544bcc39850c777ef069_219	S_aureus_9_00934
WP_000159577.1		rRNA pseudouridine synthase	4	4	1	6	946				737	737	737	e26b52046ef139bf63509f5b590c18e0_2788	935e3caf510be0c503c97acef35381b2_1102	36ade0437952544bcc39850c777ef069_3066	S_aureus_9_00100
uhpT		hexose-6-phosphate:phosphate antiporter	4	4	1	6	2627				1379	1379	1379	e26b52046ef139bf63509f5b590c18e0_315	935e3caf510be0c503c97acef35381b2_3763	36ade0437952544bcc39850c777ef069_361	S_aureus_9_01134
WP_000160904.1		undecaprenyldiphospho-muramoylpentapeptide beta-N-acetylglucosaminyltransferase	4	4	1	6	139				1070	1070	1070	e26b52046ef139bf63509f5b590c18e0_2610	935e3caf510be0c503c97acef35381b2_1388	36ade0437952544bcc39850c777ef069_2910	S_aureus_9_00028
WP_000139188.1		AEC family transporter	4	4	1	6	773				908	908	908	e26b52046ef139bf63509f5b590c18e0_4472	935e3caf510be0c503c97acef35381b2_5158	36ade0437952544bcc39850c777ef069_4667	S_aureus_9_01841
betA		choline dehydrogenase	4	4	1	6	3105				1709	1709	1709	e26b52046ef139bf63509f5b590c18e0_5205	935e3caf510be0c503c97acef35381b2_4433	36ade0437952544bcc39850c777ef069_5388	S_aureus_9_00572
WP_000334518.1		hypothetical protein	4	4	1	6	147				809	809	809	e26b52046ef139bf63509f5b590c18e0_2594	935e3caf510be0c503c97acef35381b2_1404	36ade0437952544bcc39850c777ef069_2894	S_aureus_9_00021
WP_111688640.1		penicillin-binding protein	4	4	1	6	1354				2183	2183	2183	e26b52046ef139bf63509f5b590c18e0_2675	935e3caf510be0c503c97acef35381b2_1319	36ade0437952544bcc39850c777ef069_2977	S_aureus_9_00058
map		type I methionyl aminopeptidase	4	4	1	6	1510				758	758	758	e26b52046ef139bf63509f5b590c18e0_3732	935e3caf510be0c503c97acef35381b2_179	36ade0437952544bcc39850c777ef069_3986	S_aureus_9_01981
WP_000184754.1		iron ABC transporter permease	4	4	1	6	1989				1004	1004	1004	e26b52046ef139bf63509f5b590c18e0_1215	935e3caf510be0c503c97acef35381b2_2835	36ade0437952544bcc39850c777ef069_1283	S_aureus_9_02026
femX		lipid II:glycine glycyltransferase	4	4	1	6	769				1265	1265	1265	e26b52046ef139bf63509f5b590c18e0_4480	935e3caf510be0c503c97acef35381b2_5150	36ade0437952544bcc39850c777ef069_4677	S_aureus_9_01845
WP_000737686.1		hypothetical protein	4	4	1	6	1611				581	581	581	e26b52046ef139bf63509f5b590c18e0_2864	935e3caf510be0c503c97acef35381b2_1026	36ade0437952544bcc39850c777ef069_3144	S_aureus_9_00137
WP_000185319.1		glycerophosphodiester phosphodiesterase	4	4	1	6	1008				929	929	929	e26b52046ef139bf63509f5b590c18e0_1668	935e3caf510be0c503c97acef35381b2_2350	36ade0437952544bcc39850c777ef069_1914	S_aureus_9_00761
cntE		MFS transporter	4	4	1	6	3016				1193	1193	1193	e26b52046ef139bf63509f5b590c18e0_4895	935e3caf510be0c503c97acef35381b2_4733	36ade0437952544bcc39850c777ef069_5090	S_aureus_9_00428
WP_000535834.1		ABC transporter ATP-binding protein	4	4	1	6	1527				1517	1517	1517	e26b52046ef139bf63509f5b590c18e0_3664	935e3caf510be0c503c97acef35381b2_213	36ade0437952544bcc39850c777ef069_3952	S_aureus_9_01998
WP_000356975.1		LCP family protein	4	4	1	6	195				983	983	983	e26b52046ef139bf63509f5b590c18e0_2494	935e3caf510be0c503c97acef35381b2_1507	36ade0437952544bcc39850c777ef069_2796	S_aureus_9_01919
WP_000804317.1		2-oxoacid:acceptor oxidoreductase subunit alpha	4	4	1	6	280				1760	1760	1760	e26b52046ef139bf63509f5b590c18e0_2352	935e3caf510be0c503c97acef35381b2_1665	36ade0437952544bcc39850c777ef069_2602	S_aureus_9_02339
group_2187	brnQ	branched-chain amino acid transport system II carrier protein	4	4	1	6	2699				1307	1307	1307	e26b52046ef139bf63509f5b590c18e0_489	935e3caf510be0c503c97acef35381b2_3583	36ade0437952544bcc39850c777ef069_533	S_aureus_9_01603
rlmB		23S rRNA (guanosine(2251)-2'-O)-methyltransferase RlmB	4	4	1	6	2118				746	746	746	e26b52046ef139bf63509f5b590c18e0_960	935e3caf510be0c503c97acef35381b2_3088	36ade0437952544bcc39850c777ef069_1032	S_aureus_9_02274
WP_000731641.1		LysM peptidoglycan-binding domain-containing protein	4	4	1	6	1972				797	797	797	e26b52046ef139bf63509f5b590c18e0_1249	935e3caf510be0c503c97acef35381b2_2801	36ade0437952544bcc39850c777ef069_1317	S_aureus_9_02519
group_2190	msrA	peptide-methionine (S)-S-oxide reductase MsrA	4	4	1	6	196				509	509	509	e26b52046ef139bf63509f5b590c18e0_2492	935e3caf510be0c503c97acef35381b2_1509	36ade0437952544bcc39850c777ef069_2794	S_aureus_9_01918
WP_000584628.1		AAA family ATPase	4	4	1	6	2846				2936	2936	2936	e26b52046ef139bf63509f5b590c18e0_3509	935e3caf510be0c503c97acef35381b2_364	36ade0437952544bcc39850c777ef069_3799	S_aureus_9_02243
nrdE		class 1b ribonucleoside-diphosphate reductase subunit alpha	4	4	1	6	1097				2105	2105	2105	e26b52046ef139bf63509f5b590c18e0_1385	935e3caf510be0c503c97acef35381b2_2663	36ade0437952544bcc39850c777ef069_1455	S_aureus_9_01270
WP_001289311.1		NADPH-dependent oxidoreductase	4	4	1	6	2777				755	755	755	e26b52046ef139bf63509f5b590c18e0_644	935e3caf510be0c503c97acef35381b2_3428	36ade0437952544bcc39850c777ef069_688	S_aureus_9_01526
prmA		50S ribosomal protein L11 methyltransferase	4	4	1	6	1659				938	938	938	e26b52046ef139bf63509f5b590c18e0_2961	935e3caf510be0c503c97acef35381b2_929	36ade0437952544bcc39850c777ef069_3241	S_aureus_9_00183
WP_000604990.1		hypothetical protein	4	4	1	6	1927				584	584	584	e26b52046ef139bf63509f5b590c18e0_1339	935e3caf510be0c503c97acef35381b2_2711	36ade0437952544bcc39850c777ef069_1407	S_aureus_9_01249
WP_000822160.1		DUF4467 domain-containing protein	4	4	1	6	2696				374	374	374	e26b52046ef139bf63509f5b590c18e0_483	935e3caf510be0c503c97acef35381b2_3589	36ade0437952544bcc39850c777ef069_527	S_aureus_9_01606
menB		1,4-dihydroxy-2-naphthoyl-CoA synthase	4	4	1	6	696				821	821	821	e26b52046ef139bf63509f5b590c18e0_1850	935e3caf510be0c503c97acef35381b2_2167	36ade0437952544bcc39850c777ef069_2098	S_aureus_9_01104
WP_001024576.1		M42 family metallopeptidase	4	4	1	6	1823				1076	1076	1076	e26b52046ef139bf63509f5b590c18e0_3297	935e3caf510be0c503c97acef35381b2_590	36ade0437952544bcc39850c777ef069_3577	S_aureus_9_00333
WP_000040063.1		acetate kinase	4	4	1	6	1785				1202	1202	1202	e26b52046ef139bf63509f5b590c18e0_3219	935e3caf510be0c503c97acef35381b2_668	36ade0437952544bcc39850c777ef069_3499	S_aureus_9_00300
WP_111688698.1		oleate hydratase	4	4	1	6	2512				1775	1775	1775	e26b52046ef139bf63509f5b590c18e0_103	935e3caf510be0c503c97acef35381b2_3999	36ade0437952544bcc39850c777ef069_125	S_aureus_9_00979
WP_000131381.1		phi PVL orf 51-like protein	4	5	1.25	6	1451				239	242	240	e26b52046ef139bf63509f5b590c18e0_2772 e26b52046ef139bf63509f5b590c18e0_3692	935e3caf510be0c503c97acef35381b2_5731	36ade0437952544bcc39850c777ef069_1748	S_aureus_9_01650
WP_000580198.1		hypothetical protein	4	4	1	6	227				314	314	314	e26b52046ef139bf63509f5b590c18e0_2430	935e3caf510be0c503c97acef35381b2_1571	36ade0437952544bcc39850c777ef069_2732	S_aureus_9_01891
rsfS		ribosome silencing factor	4	4	1	6	1672				353	353	353	e26b52046ef139bf63509f5b590c18e0_2987	935e3caf510be0c503c97acef35381b2_901	36ade0437952544bcc39850c777ef069_3267	S_aureus_9_00196
cap8E		type 8 capsular polysaccharide synthesis protein Cap8E	4	4	1	6	2563				1028	1028	1028	e26b52046ef139bf63509f5b590c18e0_199	935e3caf510be0c503c97acef35381b2_3901	36ade0437952544bcc39850c777ef069_223	S_aureus_9_00932
WP_000872390.1		ABC transporter permease	4	4	1	6	655				809	809	809	e26b52046ef139bf63509f5b590c18e0_1965	935e3caf510be0c503c97acef35381b2_2052	36ade0437952544bcc39850c777ef069_2217	S_aureus_9_01050
WP_000477504.1		GNAT family N-acetyltransferase	4	4	1	6	2034				476	476	476	e26b52046ef139bf63509f5b590c18e0_1125	935e3caf510be0c503c97acef35381b2_2925	36ade0437952544bcc39850c777ef069_1193	S_aureus_9_02540
fdhD		formate dehydrogenase accessory sulfurtransferase FdhD	4	4	1	6	348				797	797	797	e26b52046ef139bf63509f5b590c18e0_4518	935e3caf510be0c503c97acef35381b2_5112	36ade0437952544bcc39850c777ef069_4715	S_aureus_9_01863
efeB		iron uptake transporter deferrochelatase/peroxidase subunit	4	4	1	6	2738				1229	1229	1229	e26b52046ef139bf63509f5b590c18e0_567	935e3caf510be0c503c97acef35381b2_3505	36ade0437952544bcc39850c777ef069_611	S_aureus_9_01566
WP_000505015.1		transcription antiterminator	4	4	1	6	200				851	851	851	e26b52046ef139bf63509f5b590c18e0_2484	935e3caf510be0c503c97acef35381b2_1517	36ade0437952544bcc39850c777ef069_2786	S_aureus_9_01915
WP_064136672.1		hypothetical protein	4	4	1	6	2551				1544	1544	1544	e26b52046ef139bf63509f5b590c18e0_183	935e3caf510be0c503c97acef35381b2_3923	36ade0437952544bcc39850c777ef069_205	S_aureus_9_00943
polA		DNA polymerase I	4	4	1	6	1764				2630	2630	2630	e26b52046ef139bf63509f5b590c18e0_3175	935e3caf510be0c503c97acef35381b2_710	36ade0437952544bcc39850c777ef069_3455	S_aureus_9_00280
WP_001037436.1		membrane protein	4	4	1	6	989				1118	1118	1118	e26b52046ef139bf63509f5b590c18e0_1706	935e3caf510be0c503c97acef35381b2_2312	36ade0437952544bcc39850c777ef069_1954	S_aureus_9_00742
cyoE		heme o synthase	4	4	1	6	640				911	911	911	e26b52046ef139bf63509f5b590c18e0_1995	935e3caf510be0c503c97acef35381b2_2022	36ade0437952544bcc39850c777ef069_2247	S_aureus_9_01036
WP_000479279.1		nucleoside permease	4	4	1	6	1993				1229	1229	1229	e26b52046ef139bf63509f5b590c18e0_1207	935e3caf510be0c503c97acef35381b2_2843	36ade0437952544bcc39850c777ef069_1275	S_aureus_9_02029
WP_000312766.1		NFACT family protein	4	4	1	6	477				1697	1697	1697	e26b52046ef139bf63509f5b590c18e0_2186	935e3caf510be0c503c97acef35381b2_1831	36ade0437952544bcc39850c777ef069_2438	S_aureus_9_00690
WP_000547794.1		NupC/NupG family nucleoside CNT transporter	4	4	1	6	2129				1214	1214	1214	e26b52046ef139bf63509f5b590c18e0_938	935e3caf510be0c503c97acef35381b2_3110	36ade0437952544bcc39850c777ef069_1010	S_aureus_9_02263
ysdC_1		M42 family metallopeptidase	4	4	1	6	3009				1076	1076	1076	e26b52046ef139bf63509f5b590c18e0_4883	935e3caf510be0c503c97acef35381b2_4745	36ade0437952544bcc39850c777ef069_5078	S_aureus_9_00422
ruvA		Holliday junction branch migration protein RuvA	4	4	1	6	1722				602	602	602	e26b52046ef139bf63509f5b590c18e0_3086	935e3caf510be0c503c97acef35381b2_800	36ade0437952544bcc39850c777ef069_3366	S_aureus_9_00243
ilvD		dihydroxy-acid dehydratase	4	4	1	6	585				1688	1688	1688	e26b52046ef139bf63509f5b590c18e0_4028	935e3caf510be0c503c97acef35381b2_5597	36ade0437952544bcc39850c777ef069_4216	S_aureus_9_01706
pflB		formate C-acetyltransferase	4	4	1	6	2631				2249	2249	2249	e26b52046ef139bf63509f5b590c18e0_323	935e3caf510be0c503c97acef35381b2_3755	36ade0437952544bcc39850c777ef069_369	S_aureus_9_01138
bglK		ROK family protein	4	4	1	6	2710				860	860	860	e26b52046ef139bf63509f5b590c18e0_511	935e3caf510be0c503c97acef35381b2_3561	36ade0437952544bcc39850c777ef069_555	S_aureus_9_01593
WP_000613738.1		3'-5' exonuclease	4	4	1	6	1503				554	554	554	e26b52046ef139bf63509f5b590c18e0_3748	935e3caf510be0c503c97acef35381b2_163	36ade0437952544bcc39850c777ef069_4002	S_aureus_9_01975
WP_000638453.1		cytochrome d ubiquinol oxidase subunit II	4	4	1	6	737				1019	1019	1019	e26b52046ef139bf63509f5b590c18e0_1935	935e3caf510be0c503c97acef35381b2_2082	36ade0437952544bcc39850c777ef069_2183	S_aureus_9_01064
cntM		staphylopine dehydrogenase CntM	4	4	1	6	3022				1301	1304	1303	e26b52046ef139bf63509f5b590c18e0_4907	935e3caf510be0c503c97acef35381b2_4721	36ade0437952544bcc39850c777ef069_5102	S_aureus_9_00434
ndk		nucleoside-diphosphate kinase	4	4	1	6	1373				449	449	449	e26b52046ef139bf63509f5b590c18e0_2711	935e3caf510be0c503c97acef35381b2_1283	36ade0437952544bcc39850c777ef069_3013	S_aureus_9_00076
recG		ATP-dependent DNA helicase RecG	4	4	1	6	496				2060	2060	2060	e26b52046ef139bf63509f5b590c18e0_2224	935e3caf510be0c503c97acef35381b2_1793	36ade0437952544bcc39850c777ef069_2476	S_aureus_9_00671
nirD		nitrite reductase small subunit NirD	4	4	1	6	44				314	314	314	e26b52046ef139bf63509f5b590c18e0_4757	935e3caf510be0c503c97acef35381b2_4871	36ade0437952544bcc39850c777ef069_4950	S_aureus_9_00366
WP_072519346.1		YhgE/Pip domain-containing protein	4	4	1	6	23				1277	1277	1277	e26b52046ef139bf63509f5b590c18e0_4715	935e3caf510be0c503c97acef35381b2_4917	36ade0437952544bcc39850c777ef069_4908	S_aureus_9_01785
mnhA2		Na+/H+ antiporter Mnh2 subunit A	4	4	1	6	2014				2402	2402	2402	e26b52046ef139bf63509f5b590c18e0_1165	935e3caf510be0c503c97acef35381b2_2885	36ade0437952544bcc39850c777ef069_1233	S_aureus_9_02050
bioA		adenosylmethionine--8-amino-7-oxononanoate transaminase	4	4	1	6	2975				1358	1358	1358	e26b52046ef139bf63509f5b590c18e0_4819	935e3caf510be0c503c97acef35381b2_4809	36ade0437952544bcc39850c777ef069_5014	S_aureus_9_00394
WP_000777581.1		aminotransferase class I/II-fold pyridoxal phosphate-dependent enzyme	4	4	1	6	700				1154	1154	1154	e26b52046ef139bf63509f5b590c18e0_1858	935e3caf510be0c503c97acef35381b2_2159	36ade0437952544bcc39850c777ef069_2106	S_aureus_9_01100
WP_001186912.1		ECF transporter S component	4	4	1	6	1391				545	545	545	e26b52046ef139bf63509f5b590c18e0_2747	935e3caf510be0c503c97acef35381b2_1251	36ade0437952544bcc39850c777ef069_3045	S_aureus_9_00091
WP_000751696.1		hypothetical protein	4	4	1	6	482				953	953	953	e26b52046ef139bf63509f5b590c18e0_2196	935e3caf510be0c503c97acef35381b2_1821	36ade0437952544bcc39850c777ef069_2448	S_aureus_9_00685
smc		chromosome segregation protein SMC	4	4	1	6	503				3566	3566	3566	e26b52046ef139bf63509f5b590c18e0_2238	935e3caf510be0c503c97acef35381b2_1779	36ade0437952544bcc39850c777ef069_2490	S_aureus_9_00664
WP_000240060.1		LLM class flavin-dependent oxidoreductase	4	4	1	6	2719				1001	1001	1001	e26b52046ef139bf63509f5b590c18e0_527	935e3caf510be0c503c97acef35381b2_3545	36ade0437952544bcc39850c777ef069_571	S_aureus_9_01586
wecB		UDP-N-acetylglucosamine 2-epimerase (non-hydrolyzing)	4	4	1	6	2878				1127	1127	1127	e26b52046ef139bf63509f5b590c18e0_4160	935e3caf510be0c503c97acef35381b2_5465	36ade0437952544bcc39850c777ef069_4352	S_aureus_9_01455
WP_000680740.1		polysaccharide biosynthesis protein	4	4	1	6	2147				1526	1526	1526	e26b52046ef139bf63509f5b590c18e0_866	935e3caf510be0c503c97acef35381b2_3194	36ade0437952544bcc39850c777ef069_926	S_aureus_9_02398
spxA		transcriptional regulator SpxA	4	4	1	6	2933				395	395	395	e26b52046ef139bf63509f5b590c18e0_1742	935e3caf510be0c503c97acef35381b2_2276	36ade0437952544bcc39850c777ef069_1990	S_aureus_9_02084
WP_001018962.1		toprim domain-containing protein	4	4	1	6	1200				386	389	386	e26b52046ef139bf63509f5b590c18e0_1557	935e3caf510be0c503c97acef35381b2_2459	36ade0437952544bcc39850c777ef069_1673	S_aureus_9_00843
WP_000708692.1		allophanate hydrolase subunit 1	4	4	1	6	1083				710	710	710	e26b52046ef139bf63509f5b590c18e0_1355	935e3caf510be0c503c97acef35381b2_2695	36ade0437952544bcc39850c777ef069_1423	S_aureus_9_01256
mnhD2		Na+/H+ antiporter Mnh2 subunit D	4	4	1	6	2011				1496	1496	1496	e26b52046ef139bf63509f5b590c18e0_1171	935e3caf510be0c503c97acef35381b2_2879	36ade0437952544bcc39850c777ef069_1239	S_aureus_9_02047
WP_000273371.1		segregation/condensation protein A	4	4	1	6	944				731	755	737	e26b52046ef139bf63509f5b590c18e0_2792	935e3caf510be0c503c97acef35381b2_1098	36ade0437952544bcc39850c777ef069_3070	S_aureus_9_00102
WP_000931239.1		aldo/keto reductase	4	4	1	6	1933				839	839	839	e26b52046ef139bf63509f5b590c18e0_1327	935e3caf510be0c503c97acef35381b2_2723	36ade0437952544bcc39850c777ef069_1395	S_aureus_9_01243
group_2241	ald	alanine dehydrogenase	4	4	1	6	118				1118	1118	1118	e26b52046ef139bf63509f5b590c18e0_2650	935e3caf510be0c503c97acef35381b2_1344	36ade0437952544bcc39850c777ef069_2952	S_aureus_9_00047
rpsD		30S ribosomal protein S4	4	4	1	6	1793				602	602	602	e26b52046ef139bf63509f5b590c18e0_3237	935e3caf510be0c503c97acef35381b2_650	36ade0437952544bcc39850c777ef069_3517	S_aureus_9_00308
rpoB		DNA-directed RNA polymerase subunit beta	4	4	1	6	2107				3551	3551	3551	e26b52046ef139bf63509f5b590c18e0_983	935e3caf510be0c503c97acef35381b2_3065	36ade0437952544bcc39850c777ef069_1055	S_aureus_9_02284
ribB		3,4-dihydroxy-2-butanone-4-phosphate synthase	4	4	1	6	1847				1181	1181	1181	e26b52046ef139bf63509f5b590c18e0_3343	935e3caf510be0c503c97acef35381b2_546	36ade0437952544bcc39850c777ef069_3619	S_aureus_9_02425
rbsK		ribokinase	4	4	1	6	2675				914	914	914	e26b52046ef139bf63509f5b590c18e0_421	935e3caf510be0c503c97acef35381b2_3661	36ade0437952544bcc39850c777ef069_461	S_aureus_9_01180
WP_000818525.1		amino acid permease	4	4	1	6	1770				1361	1361	1361	e26b52046ef139bf63509f5b590c18e0_3187	935e3caf510be0c503c97acef35381b2_698	36ade0437952544bcc39850c777ef069_3467	S_aureus_9_00286
cap8B		type 8 capsular polysaccharide synthesis protein Cap8B	4	4	1	6	2561				686	686	686	e26b52046ef139bf63509f5b590c18e0_193	935e3caf510be0c503c97acef35381b2_3907	36ade0437952544bcc39850c777ef069_217	S_aureus_9_00935
hisB		imidazoleglycerol-phosphate dehydratase HisB	4	4	1	6	2349				578	578	578	e26b52046ef139bf63509f5b590c18e0_5351	935e3caf510be0c503c97acef35381b2_4289	36ade0437952544bcc39850c777ef069_5532	S_aureus_9_01332
secA2		accessory Sec system translocase SecA2	4	4	1	6	2321				2390	2390	2390	e26b52046ef139bf63509f5b590c18e0_5299	935e3caf510be0c503c97acef35381b2_4341	36ade0437952544bcc39850c777ef069_5482	S_aureus_9_00611
WP_001183436.1		DUF309 domain-containing protein	4	4	1	6	943				506	506	506	e26b52046ef139bf63509f5b590c18e0_2794	935e3caf510be0c503c97acef35381b2_1096	36ade0437952544bcc39850c777ef069_3072	S_aureus_9_00103
WP_000732326.1		MetQ/NlpA family ABC transporter substrate-binding protein	4	4	1	6	1204				821	821	821	e26b52046ef139bf63509f5b590c18e0_1566	935e3caf510be0c503c97acef35381b2_2450	36ade0437952544bcc39850c777ef069_1682	S_aureus_9_00839
phnE		phosphonate ABC transporter, permease protein PhnE	4	4	1	6	2548				800	800	800	e26b52046ef139bf63509f5b590c18e0_177	935e3caf510be0c503c97acef35381b2_3929	36ade0437952544bcc39850c777ef069_199	S_aureus_9_00946
WP_000688492.1		LytTR family DNA-binding domain-containing protein	4	4	1	6	570				716	716	716	e26b52046ef139bf63509f5b590c18e0_3994	935e3caf510be0c503c97acef35381b2_5631	36ade0437952544bcc39850c777ef069_4180	S_aureus_9_01692
WP_001237506.1		MFS transporter	4	4	1	6	858				1343	1343	1343	e26b52046ef139bf63509f5b590c18e0_4304	935e3caf510be0c503c97acef35381b2_5326	36ade0437952544bcc39850c777ef069_4497	S_aureus_9_02330
hutU		urocanate hydratase	4	4	1	6	400				1661	1661	1661	e26b52046ef139bf63509f5b590c18e0_4623	935e3caf510be0c503c97acef35381b2_5007	36ade0437952544bcc39850c777ef069_4820	S_aureus_9_01744
WP_000533494.1		replication initiation and membrane attachment family protein	4	4	1	6	1759				1400	1400	1400	e26b52046ef139bf63509f5b590c18e0_3165	935e3caf510be0c503c97acef35381b2_720	36ade0437952544bcc39850c777ef069_3445	S_aureus_9_00275
WP_000684143.1		FAD-dependent monooxygenase	4	4	1	6	373				1124	1124	1124	e26b52046ef139bf63509f5b590c18e0_4568	935e3caf510be0c503c97acef35381b2_5062	36ade0437952544bcc39850c777ef069_4765	S_aureus_9_01718
ureG		urease accessory protein UreG	4	4	1	6	360				614	614	614	e26b52046ef139bf63509f5b590c18e0_4542	935e3caf510be0c503c97acef35381b2_5088	36ade0437952544bcc39850c777ef069_4739	S_aureus_9_01875
WP_000132890.1		alpha/beta hydrolase	4	4	1	6	2833				554	554	554	e26b52046ef139bf63509f5b590c18e0_3483	935e3caf510be0c503c97acef35381b2_390	36ade0437952544bcc39850c777ef069_3773	S_aureus_9_02231
plsX		phosphate acyltransferase PlsX	4	4	1	6	498				986	986	986	e26b52046ef139bf63509f5b590c18e0_2228	935e3caf510be0c503c97acef35381b2_1789	36ade0437952544bcc39850c777ef069_2480	S_aureus_9_00669
WP_000995800.1		hypothetical protein	4	4	1	6	938				248	248	248	e26b52046ef139bf63509f5b590c18e0_2804	935e3caf510be0c503c97acef35381b2_1086	36ade0437952544bcc39850c777ef069_3082	S_aureus_9_00108
WP_001549787.1		membrane protein	4	4	1	6	3203				1079	1079	1079	e26b52046ef139bf63509f5b590c18e0_5013	935e3caf510be0c503c97acef35381b2_4629	36ade0437952544bcc39850c777ef069_5194	S_aureus_9_00478
WP_000717388.1		CHAP domain-containing protein	4	4	1	6	367				803	809	807	e26b52046ef139bf63509f5b590c18e0_4554	935e3caf510be0c503c97acef35381b2_5076	36ade0437952544bcc39850c777ef069_4751	S_aureus_9_01881
WP_000291417.1		alanine--glyoxylate aminotransferase family protein	4	4	1	6	1796				1160	1160	1160	e26b52046ef139bf63509f5b590c18e0_3243	935e3caf510be0c503c97acef35381b2_644	36ade0437952544bcc39850c777ef069_3523	S_aureus_9_00311
WP_001109939.1		rod shape-determining protein RodA	4	4	1	6	2906				1202	1202	1202	e26b52046ef139bf63509f5b590c18e0_4105	935e3caf510be0c503c97acef35381b2_5520	36ade0437952544bcc39850c777ef069_4297	S_aureus_9_01429
srtA		class A sortase SrtA	4	4	1	6	3192				620	620	620	e26b52046ef139bf63509f5b590c18e0_5035	935e3caf510be0c503c97acef35381b2_4607	36ade0437952544bcc39850c777ef069_5216	S_aureus_9_00489
WP_000777188.1		metal-dependent hydrolase	4	4	1	6	1780				689	689	689	e26b52046ef139bf63509f5b590c18e0_3209	935e3caf510be0c503c97acef35381b2_678	36ade0437952544bcc39850c777ef069_3489	S_aureus_9_00296
WP_001184010.1		acetoin utilization protein AcuC	4	4	1	6	1812				1169	1169	1169	e26b52046ef139bf63509f5b590c18e0_3273	935e3caf510be0c503c97acef35381b2_614	36ade0437952544bcc39850c777ef069_3553	S_aureus_9_00323
mutS		DNA mismatch repair protein MutS	4	4	1	6	274				2618	2618	2618	e26b52046ef139bf63509f5b590c18e0_2364	935e3caf510be0c503c97acef35381b2_1653	36ade0437952544bcc39850c777ef069_2614	S_aureus_9_02345
thiI		tRNA 4-thiouridine(8) synthase ThiI	4	4	1	6	1789				1223	1223	1223	e26b52046ef139bf63509f5b590c18e0_3227	935e3caf510be0c503c97acef35381b2_660	36ade0437952544bcc39850c777ef069_3507	S_aureus_9_00304
WP_000606334.1		Na+/H+ antiporter family protein	4	4	1	6	1024				1316	1316	1316	e26b52046ef139bf63509f5b590c18e0_1636	935e3caf510be0c503c97acef35381b2_2382	36ade0437952544bcc39850c777ef069_1882	S_aureus_9_00777
WP_000256340.1		LacI family DNA-binding transcriptional regulator	4	4	1	6	1588				1019	1019	1019	e26b52046ef139bf63509f5b590c18e0_2818	935e3caf510be0c503c97acef35381b2_1072	36ade0437952544bcc39850c777ef069_3096	S_aureus_9_00115
graX		auxiliary protein GraX/ApsX	4	4	1	6	1979				923	923	923	e26b52046ef139bf63509f5b590c18e0_1235	935e3caf510be0c503c97acef35381b2_2815	36ade0437952544bcc39850c777ef069_1303	S_aureus_9_02016
rsmG		16S rRNA (guanine(527)-N(7))-methyltransferase RsmG	4	4	1	6	2383				719	719	719	e26b52046ef139bf63509f5b590c18e0_5421	935e3caf510be0c503c97acef35381b2_4227	36ade0437952544bcc39850c777ef069_5604	S_aureus_9_01367
WP_000389956.1		amino acid permease	4	4	1	6	225				1454	1454	1454	e26b52046ef139bf63509f5b590c18e0_2434	935e3caf510be0c503c97acef35381b2_1567	36ade0437952544bcc39850c777ef069_2736	S_aureus_9_01892
WP_249741523.1		acetyltransferase	4	4	1	6	994				1814	1814	1814	e26b52046ef139bf63509f5b590c18e0_1696	935e3caf510be0c503c97acef35381b2_2322	36ade0437952544bcc39850c777ef069_1944	S_aureus_9_00747
pmtA		phenol-soluble modulin export ABC transporter ATP-binding protein PmtA	4	4	1	6	1461				896	896	896	e26b52046ef139bf63509f5b590c18e0_3834	935e3caf510be0c503c97acef35381b2_77	36ade0437952544bcc39850c777ef069_4088	S_aureus_9_02529
WP_000730043.1		SDR family oxidoreductase	4	4	1	6	397				881	881	881	e26b52046ef139bf63509f5b590c18e0_4617	935e3caf510be0c503c97acef35381b2_5013	36ade0437952544bcc39850c777ef069_4814	S_aureus_9_01741
WP_001153742.1		competence protein ComK	4	4	1	6	1856				443	443	443	e26b52046ef139bf63509f5b590c18e0_3364	935e3caf510be0c503c97acef35381b2_527	36ade0437952544bcc39850c777ef069_3638	S_aureus_9_02435
WP_000174285.1		glycerophosphoryl diester phosphodiesterase	4	4	1	6	1794				743	743	743	e26b52046ef139bf63509f5b590c18e0_3239	935e3caf510be0c503c97acef35381b2_648	36ade0437952544bcc39850c777ef069_3519	S_aureus_9_00309
WP_000983330.1		lactose-specific PTS transporter subunit EIIC	4	4	1	6	836				1712	1712	1712	e26b52046ef139bf63509f5b590c18e0_4350	935e3caf510be0c503c97acef35381b2_5282	36ade0437952544bcc39850c777ef069_4541	S_aureus_9_02309
WP_001063559.1		superantigen-like protein SSL13	4	4	1	6	336				725	725	725	e26b52046ef139bf63509f5b590c18e0_2097	935e3caf510be0c503c97acef35381b2_1920	36ade0437952544bcc39850c777ef069_2349	S_aureus_9_00735
pepT_1		tripeptidase T	4	4	1	6	1593				1133	1133	1133	e26b52046ef139bf63509f5b590c18e0_2826	935e3caf510be0c503c97acef35381b2_1064	36ade0437952544bcc39850c777ef069_3106	S_aureus_9_00118
WP_000668820.1		lipoate--protein ligase	4	4	1	6	674				986	986	986	e26b52046ef139bf63509f5b590c18e0_1806	935e3caf510be0c503c97acef35381b2_2211	36ade0437952544bcc39850c777ef069_2058	S_aureus_9_02115
WP_000776422.1		type II secretion system F family protein	4	4	1	6	1624				1070	1070	1070	e26b52046ef139bf63509f5b590c18e0_2891	935e3caf510be0c503c97acef35381b2_999	36ade0437952544bcc39850c777ef069_3171	S_aureus_9_00149
WP_000409158.1		cysteine desulfurase	4	4	1	6	1701				1142	1142	1142	e26b52046ef139bf63509f5b590c18e0_3043	935e3caf510be0c503c97acef35381b2_843	36ade0437952544bcc39850c777ef069_3323	S_aureus_9_00224
sufC		Fe-S cluster assembly ATPase SufC	4	4	1	6	1207				761	761	761	e26b52046ef139bf63509f5b590c18e0_1572	935e3caf510be0c503c97acef35381b2_2444	36ade0437952544bcc39850c777ef069_1688	S_aureus_9_00836
WP_000138645.1		ABC transporter ATP-binding protein	4	4	1	6	2357				1712	1712	1712	e26b52046ef139bf63509f5b590c18e0_5367	935e3caf510be0c503c97acef35381b2_4273	36ade0437952544bcc39850c777ef069_5548	S_aureus_9_01340
ybaK		Cys-tRNA(Pro) deacylase	4	4	1	6	1939				482	482	482	e26b52046ef139bf63509f5b590c18e0_1315	935e3caf510be0c503c97acef35381b2_2735	36ade0437952544bcc39850c777ef069_1383	S_aureus_9_01237
WP_000805950.1		uroporphyrinogen-III synthase	4	4	1	6	1742				668	668	668	e26b52046ef139bf63509f5b590c18e0_3130	935e3caf510be0c503c97acef35381b2_756	36ade0437952544bcc39850c777ef069_3410	S_aureus_9_00260
mutL		DNA mismatch repair endonuclease MutL	4	4	1	6	273				2009	2009	2009	e26b52046ef139bf63509f5b590c18e0_2366	935e3caf510be0c503c97acef35381b2_1651	36ade0437952544bcc39850c777ef069_2616	S_aureus_9_02346
WP_000761395.1		ABC transporter permease	4	4	1	6	440				1055	1055	1055	e26b52046ef139bf63509f5b590c18e0_4685	935e3caf510be0c503c97acef35381b2_4949	36ade0437952544bcc39850c777ef069_4878	S_aureus_9_01771
fetB		iron export ABC transporter permease subunit FetB	4	4	1	6	3006				776	776	776	e26b52046ef139bf63509f5b590c18e0_4879	935e3caf510be0c503c97acef35381b2_4749	36ade0437952544bcc39850c777ef069_5074	S_aureus_9_00420
WP_001788899.1		type II secretion system GspH family protein	4	4	1	6	1622				434	446	443	e26b52046ef139bf63509f5b590c18e0_2887	935e3caf510be0c503c97acef35381b2_1003	36ade0437952544bcc39850c777ef069_3167	S_aureus_9_00147
WP_000049923.1		biotin--[acetyl-CoA-carboxylase] ligase	4	4	1	6	1360				971	971	971	e26b52046ef139bf63509f5b590c18e0_2687	935e3caf510be0c503c97acef35381b2_1307	36ade0437952544bcc39850c777ef069_2989	S_aureus_9_00064
WP_000066356.1		hypothetical protein	4	4	1	6	3129				368	371	368	e26b52046ef139bf63509f5b590c18e0_5157	935e3caf510be0c503c97acef35381b2_4485	36ade0437952544bcc39850c777ef069_5338	S_aureus_9_00548
WP_001124167.1		PTS-dependent dihydroxyacetone kinase phosphotransferase subunit DhaM	4	4	1	6	1985				362	362	362	e26b52046ef139bf63509f5b590c18e0_1223	935e3caf510be0c503c97acef35381b2_2827	36ade0437952544bcc39850c777ef069_1291	S_aureus_9_02022
WP_001176871.1		glycerate kinase	4	4	1	6	2981				1142	1142	1142	e26b52046ef139bf63509f5b590c18e0_4833	935e3caf510be0c503c97acef35381b2_4795	36ade0437952544bcc39850c777ef069_5028	S_aureus_9_00399
tarS		poly(ribitol-phosphate) beta-N-acetylglucosaminyltransferase	4	4	1	6	2664				1721	1721	1721	e26b52046ef139bf63509f5b590c18e0_399	935e3caf510be0c503c97acef35381b2_3683	36ade0437952544bcc39850c777ef069_439	S_aureus_9_01170
graR		response regulator transcription factor GraR/ApsR	4	4	1	6	1978				674	674	674	e26b52046ef139bf63509f5b590c18e0_1237	935e3caf510be0c503c97acef35381b2_2813	36ade0437952544bcc39850c777ef069_1305	S_aureus_9_02015
WP_001125619.1		amidase domain-containing protein	4	4	1	6	3064				1859	1859	1859	e26b52046ef139bf63509f5b590c18e0_5289	935e3caf510be0c503c97acef35381b2_4351	36ade0437952544bcc39850c777ef069_5472	S_aureus_9_00606
asnS		asparagine--tRNA ligase	4	4	1	6	1358				1292	1292	1292	e26b52046ef139bf63509f5b590c18e0_2683	935e3caf510be0c503c97acef35381b2_1311	36ade0437952544bcc39850c777ef069_2985	S_aureus_9_00062
nsaR		nisin susceptibility-associated two-component system response regulator NsaR	4	4	1	6	3085				665	665	665	e26b52046ef139bf63509f5b590c18e0_5247	935e3caf510be0c503c97acef35381b2_4393	36ade0437952544bcc39850c777ef069_5430	S_aureus_9_00586
hchA		protein deglycase HchA	4	4	1	6	2098				878	878	878	e26b52046ef139bf63509f5b590c18e0_1001	935e3caf510be0c503c97acef35381b2_3047	36ade0437952544bcc39850c777ef069_1073	S_aureus_9_02293
WP_000414635.1		MFS transporter	4	4	1	6	2533				626	626	626	e26b52046ef139bf63509f5b590c18e0_143	935e3caf510be0c503c97acef35381b2_3963	36ade0437952544bcc39850c777ef069_165	S_aureus_9_00961
WP_001213908.1		metal ABC transporter ATP-binding protein	4	4	1	6	1637				710	785	766	e26b52046ef139bf63509f5b590c18e0_2917	935e3caf510be0c503c97acef35381b2_973	36ade0437952544bcc39850c777ef069_3197	S_aureus_9_00161
WP_000266883.1		YeeE/YedE family protein	4	4	1	6	576				1079	1079	1079	e26b52046ef139bf63509f5b590c18e0_4008	935e3caf510be0c503c97acef35381b2_5617	36ade0437952544bcc39850c777ef069_4194	S_aureus_9_01698
WP_000811163.1		thioredoxin family protein	4	4	1	6	1822				311	311	311	e26b52046ef139bf63509f5b590c18e0_3295	935e3caf510be0c503c97acef35381b2_592	36ade0437952544bcc39850c777ef069_3575	S_aureus_9_00332
mnhE2		Na+/H+ antiporter Mnh2 subunit E	4	4	1	6	2010				482	482	482	e26b52046ef139bf63509f5b590c18e0_1173	935e3caf510be0c503c97acef35381b2_2877	36ade0437952544bcc39850c777ef069_1241	S_aureus_9_02046
alr1_1		alanine racemase	4	4	1	6	159				1085	1085	1085	e26b52046ef139bf63509f5b590c18e0_2568	935e3caf510be0c503c97acef35381b2_1430	36ade0437952544bcc39850c777ef069_2870	S_aureus_9_00009
queD		6-carboxytetrahydropterin synthase QueD	4	4	1	6	1925				419	419	419	e26b52046ef139bf63509f5b590c18e0_1343	935e3caf510be0c503c97acef35381b2_2707	36ade0437952544bcc39850c777ef069_1411	S_aureus_9_01251
splB		serine protease SplB	4	4	1	6	2827				722	722	722	e26b52046ef139bf63509f5b590c18e0_3441	935e3caf510be0c503c97acef35381b2_448	36ade0437952544bcc39850c777ef069_3719	S_aureus_9_02480
WP_000814565.1		hypothetical protein	4	4	1	6	634				389	389	389	e26b52046ef139bf63509f5b590c18e0_2007	935e3caf510be0c503c97acef35381b2_2010	36ade0437952544bcc39850c777ef069_2259	S_aureus_9_01030
rocD		ornithine--oxo-acid transaminase	4	4	1	6	2590				1184	1184	1184	e26b52046ef139bf63509f5b590c18e0_253	935e3caf510be0c503c97acef35381b2_3839	36ade0437952544bcc39850c777ef069_285	S_aureus_9_00900
WP_000214890.1		YmfK family protein	4	4	1	6	288				827	827	827	e26b52046ef139bf63509f5b590c18e0_2336	935e3caf510be0c503c97acef35381b2_1681	36ade0437952544bcc39850c777ef069_2586	S_aureus_9_00619
norB		multidrug efflux MFS transporter NorB	4	4	1	6	121				1391	1391	1391	e26b52046ef139bf63509f5b590c18e0_2644	935e3caf510be0c503c97acef35381b2_1350	36ade0437952544bcc39850c777ef069_2946	S_aureus_9_00044
WP_000624584.1		tRNA (adenine(22)-N(1))-methyltransferase TrmK	4	4	1	6	1641				677	677	677	e26b52046ef139bf63509f5b590c18e0_2925	935e3caf510be0c503c97acef35381b2_965	36ade0437952544bcc39850c777ef069_3205	S_aureus_9_00165
WP_000286877.1		6-carboxyhexanoate--CoA ligase	4	4	1	6	2972				692	692	692	e26b52046ef139bf63509f5b590c18e0_4813	935e3caf510be0c503c97acef35381b2_4815	36ade0437952544bcc39850c777ef069_5008	S_aureus_9_00391
WP_000381267.1		MFS transporter	4	4	1	6	2993				1400	1400	1400	e26b52046ef139bf63509f5b590c18e0_4857	935e3caf510be0c503c97acef35381b2_4771	36ade0437952544bcc39850c777ef069_5052	S_aureus_9_00411
WP_000368902.1		ACT domain-containing protein	4	4	1	6	1723				455	458	455	e26b52046ef139bf63509f5b590c18e0_3088	935e3caf510be0c503c97acef35381b2_798	36ade0437952544bcc39850c777ef069_3368	S_aureus_9_00244
WP_000670752.1		fumarylacetoacetate hydrolase family protein	4	4	1	6	999				902	902	902	e26b52046ef139bf63509f5b590c18e0_1686	935e3caf510be0c503c97acef35381b2_2332	36ade0437952544bcc39850c777ef069_1932	S_aureus_9_00752
WP_000842860.1		DUF1129 family protein	4	4	1	6	1961				689	689	689	e26b52046ef139bf63509f5b590c18e0_1271	935e3caf510be0c503c97acef35381b2_2779	36ade0437952544bcc39850c777ef069_1339	S_aureus_9_01215
WP_000161829.1		SDR family NAD(P)-dependent oxidoreductase	4	4	1	6	3136				704	704	704	e26b52046ef139bf63509f5b590c18e0_5143	935e3caf510be0c503c97acef35381b2_4499	36ade0437952544bcc39850c777ef069_5324	S_aureus_9_00541
WP_000273253.1		energy-coupling factor transporter transmembrane protein EcfT	4	4	1	6	726				806	806	806	e26b52046ef139bf63509f5b590c18e0_1912	935e3caf510be0c503c97acef35381b2_2105	36ade0437952544bcc39850c777ef069_2160	S_aureus_9_01075
dnaX		DNA polymerase III subunit gamma/tau	4	4	1	6	2174				1697	1697	1697	e26b52046ef139bf63509f5b590c18e0_801	935e3caf510be0c503c97acef35381b2_3259	36ade0437952544bcc39850c777ef069_861	S_aureus_9_02121
WP_000020304.1		class I SAM-dependent methyltransferase	4	4	1	6	2108				608	608	608	e26b52046ef139bf63509f5b590c18e0_981	935e3caf510be0c503c97acef35381b2_3067	36ade0437952544bcc39850c777ef069_1053	S_aureus_9_02283
WP_000362218.1		DnaD domain-containing protein	4	4	1	6	1357				686	686	686	e26b52046ef139bf63509f5b590c18e0_2681	935e3caf510be0c503c97acef35381b2_1313	36ade0437952544bcc39850c777ef069_2983	S_aureus_9_00061
WP_001797828.1		helix-turn-helix transcriptional regulator	4	4	1	6	1645				539	623	602	e26b52046ef139bf63509f5b590c18e0_2933	935e3caf510be0c503c97acef35381b2_957	36ade0437952544bcc39850c777ef069_3213	S_aureus_9_00169
accC		acetyl-CoA carboxylase biotin carboxylase subunit	4	4	1	6	1685				1361	1361	1361	e26b52046ef139bf63509f5b590c18e0_3011	935e3caf510be0c503c97acef35381b2_875	36ade0437952544bcc39850c777ef069_3291	S_aureus_9_00208
WP_000433551.1		ABC transporter ATP-binding protein	4	4	1	6	657				1094	1094	1094	e26b52046ef139bf63509f5b590c18e0_1961	935e3caf510be0c503c97acef35381b2_2056	36ade0437952544bcc39850c777ef069_2213	S_aureus_9_01052
mprF		bifunctional lysylphosphatidylglycerol flippase/synthetase MprF	4	4	1	6	197				2522	2522	2522	e26b52046ef139bf63509f5b590c18e0_2490	935e3caf510be0c503c97acef35381b2_1511	36ade0437952544bcc39850c777ef069_2792	S_aureus_9_01917
WP_000258645.1		diglucosyl diacylglycerol synthase	4	4	1	6	2942				1175	1175	1175	e26b52046ef139bf63509f5b590c18e0_1780	935e3caf510be0c503c97acef35381b2_2238	36ade0437952544bcc39850c777ef069_2032	S_aureus_9_02103
nreB		nitrate respiration regulation sensor histidine kinase NreB	4	4	1	6	37				1034	1034	1034	e26b52046ef139bf63509f5b590c18e0_4743	935e3caf510be0c503c97acef35381b2_4885	36ade0437952544bcc39850c777ef069_4936	S_aureus_9_00359
WP_000035773.1		DNA translocase FtsK	4	4	1	6	293				2369	2369	2369	e26b52046ef139bf63509f5b590c18e0_2326	935e3caf510be0c503c97acef35381b2_1691	36ade0437952544bcc39850c777ef069_2576	S_aureus_9_00624
sbnB		N-[(2S)-2-amino-2-carboxyethyl]-L-glutamate dehydrogenase SbnB	4	4	1	6	2525				1010	1010	1010	e26b52046ef139bf63509f5b590c18e0_125	935e3caf510be0c503c97acef35381b2_3981	36ade0437952544bcc39850c777ef069_147	S_aureus_9_00970
WP_000610203.1		ribitol-5-phosphate dehydrogenase	4	4	1	6	2662				1025	1025	1025	e26b52046ef139bf63509f5b590c18e0_395	935e3caf510be0c503c97acef35381b2_3687	36ade0437952544bcc39850c777ef069_435	S_aureus_9_01168
WP_001058583.1		bifunctional (p)ppGpp synthetase/guanosine-3',5'-bis(diphosphate) 3'-pyrophosphohydrolase	4	4	1	6	1714				2189	2210	2194	e26b52046ef139bf63509f5b590c18e0_3070	935e3caf510be0c503c97acef35381b2_816	36ade0437952544bcc39850c777ef069_3350	S_aureus_9_00235
addA		helicase-exonuclease AddAB subunit AddA	4	4	1	6	1000				3653	3653	3653	e26b52046ef139bf63509f5b590c18e0_1684	935e3caf510be0c503c97acef35381b2_2334	36ade0437952544bcc39850c777ef069_1930	S_aureus_9_00753
WP_001802667.1		hypothetical protein	4	4	1	6	1655				683	707	689	e26b52046ef139bf63509f5b590c18e0_2953	935e3caf510be0c503c97acef35381b2_937	36ade0437952544bcc39850c777ef069_3233	S_aureus_9_00179
WP_000184370.1		penicillin-binding protein	4	4	1	6	1806				905	905	905	e26b52046ef139bf63509f5b590c18e0_3259	935e3caf510be0c503c97acef35381b2_628	36ade0437952544bcc39850c777ef069_3539	S_aureus_9_00318
WP_000691304.1		exonuclease SbcCD subunit D	4	4	1	6	211				1121	1121	1121	e26b52046ef139bf63509f5b590c18e0_2462	935e3caf510be0c503c97acef35381b2_1539	36ade0437952544bcc39850c777ef069_2764	S_aureus_9_01904
moaC		cyclic pyranopterin monophosphate synthase MoaC	4	4	1	6	756				494	494	494	e26b52046ef139bf63509f5b590c18e0_4506	935e3caf510be0c503c97acef35381b2_5124	36ade0437952544bcc39850c777ef069_4703	S_aureus_9_01857
yfmC_2		ABC transporter substrate-binding protein	4	4	1	6	850				983	983	983	e26b52046ef139bf63509f5b590c18e0_4320	935e3caf510be0c503c97acef35381b2_5310	36ade0437952544bcc39850c777ef069_4513	S_aureus_9_02322
dinB		DNA polymerase IV	4	4	1	6	1502				1070	1070	1070	e26b52046ef139bf63509f5b590c18e0_3750	935e3caf510be0c503c97acef35381b2_161	36ade0437952544bcc39850c777ef069_4004	S_aureus_9_01974
WP_000083807.1		PTS mannitol transporter subunit IICB	4	4	1	6	94				1538	1538	1538	e26b52046ef139bf63509f5b590c18e0_4244	935e3caf510be0c503c97acef35381b2_5379	36ade0437952544bcc39850c777ef069_4442	S_aureus_9_01495
accB		acetyl-CoA carboxylase biotin carboxyl carrier protein	4	4	1	6	1608				464	464	464	e26b52046ef139bf63509f5b590c18e0_2858	935e3caf510be0c503c97acef35381b2_1032	36ade0437952544bcc39850c777ef069_3138	S_aureus_9_00134
WP_001100835.1		long-chain fatty acid--CoA ligase	4	4	1	6	2075				1376	1376	1376	e26b52046ef139bf63509f5b590c18e0_1047	935e3caf510be0c503c97acef35381b2_3001	36ade0437952544bcc39850c777ef069_1119	S_aureus_9_02178
WP_000151982.1		hydroxymethylglutaryl-CoA synthase	4	4	1	6	3170				1166	1166	1166	e26b52046ef139bf63509f5b590c18e0_5077	935e3caf510be0c503c97acef35381b2_4567	36ade0437952544bcc39850c777ef069_5256	S_aureus_9_00508
WP_000184404.1		MFS transporter	4	4	1	6	765				1211	1211	1211	e26b52046ef139bf63509f5b590c18e0_4488	935e3caf510be0c503c97acef35381b2_5142	36ade0437952544bcc39850c777ef069_4685	S_aureus_9_01849
hemW		radical SAM family heme chaperone HemW	4	4	1	6	1664				1124	1157	1132	e26b52046ef139bf63509f5b590c18e0_2971	935e3caf510be0c503c97acef35381b2_919	36ade0437952544bcc39850c777ef069_3251	S_aureus_9_00188
WP_001081351.1		ABC transporter substrate-binding protein	4	4	1	6	687				959	959	959	e26b52046ef139bf63509f5b590c18e0_1832	935e3caf510be0c503c97acef35381b2_2185	36ade0437952544bcc39850c777ef069_2080	S_aureus_9_01112
lacG		6-phospho-beta-galactosidase	4	4	1	6	837				1412	1412	1412	e26b52046ef139bf63509f5b590c18e0_4348	935e3caf510be0c503c97acef35381b2_5284	36ade0437952544bcc39850c777ef069_4539	S_aureus_9_02310
xerD		site-specific tyrosine recombinase XerD	4	4	1	6	942				887	887	887	e26b52046ef139bf63509f5b590c18e0_2796	935e3caf510be0c503c97acef35381b2_1094	36ade0437952544bcc39850c777ef069_3074	S_aureus_9_00104
tig		trigger factor	4	4	1	6	1748				1301	1301	1301	e26b52046ef139bf63509f5b590c18e0_3142	935e3caf510be0c503c97acef35381b2_744	36ade0437952544bcc39850c777ef069_3422	S_aureus_9_00266
pgeF		peptidoglycan editing factor PgeF	4	4	1	6	457				791	791	791	e26b52046ef139bf63509f5b590c18e0_2144	935e3caf510be0c503c97acef35381b2_1873	36ade0437952544bcc39850c777ef069_2396	S_aureus_9_00710
proC		pyrroline-5-carboxylate reductase	4	4	1	6	936				812	815	813	e26b52046ef139bf63509f5b590c18e0_2808	935e3caf510be0c503c97acef35381b2_1082	36ade0437952544bcc39850c777ef069_3086	S_aureus_9_00110
miaB		tRNA (N6-isopentenyl adenosine(37)-C2)-methylthiotransferase MiaB	4	4	1	6	277				1544	1544	1544	e26b52046ef139bf63509f5b590c18e0_2358	935e3caf510be0c503c97acef35381b2_1659	36ade0437952544bcc39850c777ef069_2608	S_aureus_9_02342
WP_000183726.1		hypothetical protein	4	4	1	6	71				1193	1193	1193	e26b52046ef139bf63509f5b590c18e0_4202	935e3caf510be0c503c97acef35381b2_5423	36ade0437952544bcc39850c777ef069_4394	S_aureus_9_01476
lnrL_2		ABC transporter ATP-binding protein	4	4	1	6	410				899	899	899	e26b52046ef139bf63509f5b590c18e0_4645	935e3caf510be0c503c97acef35381b2_4987	36ade0437952544bcc39850c777ef069_4840	S_aureus_9_01753
nusG		transcription termination/antitermination protein NusG	4	4	1	6	2113				548	548	548	e26b52046ef139bf63509f5b590c18e0_970	935e3caf510be0c503c97acef35381b2_3078	36ade0437952544bcc39850c777ef069_1042	S_aureus_9_02278
WP_000439693.1		ComE operon protein 2	4	4	1	6	1669				431	461	453	e26b52046ef139bf63509f5b590c18e0_2981	935e3caf510be0c503c97acef35381b2_907	36ade0437952544bcc39850c777ef069_3261	S_aureus_9_00193
pgsA		CDP-diacylglycerol--glycerol-3-phosphate 3-phosphatidyltransferase	4	4	1	6	286				578	578	578	e26b52046ef139bf63509f5b590c18e0_2340	935e3caf510be0c503c97acef35381b2_1677	36ade0437952544bcc39850c777ef069_2590	S_aureus_9_00617
tagH		teichoic acids export ABC transporter ATP-binding subunit TagH	4	4	1	6	2000				794	794	794	e26b52046ef139bf63509f5b590c18e0_1193	935e3caf510be0c503c97acef35381b2_2857	36ade0437952544bcc39850c777ef069_1261	S_aureus_9_02036
prmC		peptide chain release factor N(5)-glutamine methyltransferase	4	4	1	6	2872				836	836	836	e26b52046ef139bf63509f5b590c18e0_4172	935e3caf510be0c503c97acef35381b2_5453	36ade0437952544bcc39850c777ef069_4364	S_aureus_9_01461
cap8P		type 8 capsular polysaccharide synthesis protein Cap8P	4	4	1	6	2571				1145	1145	1145	e26b52046ef139bf63509f5b590c18e0_213	935e3caf510be0c503c97acef35381b2_3879	36ade0437952544bcc39850c777ef069_245	S_aureus_9_00921
infB		translation initiation factor IF-2	4	4	1	6	300				2117	2117	2117	e26b52046ef139bf63509f5b590c18e0_2312	935e3caf510be0c503c97acef35381b2_1705	36ade0437952544bcc39850c777ef069_2562	S_aureus_9_00631
WP_000454784.1		HAD family hydrolase	4	4	1	6	2094				683	683	683	e26b52046ef139bf63509f5b590c18e0_1009	935e3caf510be0c503c97acef35381b2_3039	36ade0437952544bcc39850c777ef069_1081	S_aureus_9_02504
WP_001067261.1		deoxynucleoside kinase	4	4	1	6	2093				662	662	662	e26b52046ef139bf63509f5b590c18e0_1011	935e3caf510be0c503c97acef35381b2_3037	36ade0437952544bcc39850c777ef069_1083	S_aureus_9_02503
WP_000603969.1		ABC transporter permease	4	4	1	6	239				731	731	731	e26b52046ef139bf63509f5b590c18e0_2406	935e3caf510be0c503c97acef35381b2_1595	36ade0437952544bcc39850c777ef069_2708	S_aureus_9_02545
cap8F		type 8 capsular polysaccharide synthesis protein Cap8F	4	4	1	6	2564				1109	1109	1109	e26b52046ef139bf63509f5b590c18e0_201	935e3caf510be0c503c97acef35381b2_3899	36ade0437952544bcc39850c777ef069_225	S_aureus_9_00931
WP_001017865.1		rhomboid family intramembrane serine protease	4	4	1	6	1630				1463	1463	1463	e26b52046ef139bf63509f5b590c18e0_2903	935e3caf510be0c503c97acef35381b2_987	36ade0437952544bcc39850c777ef069_3183	S_aureus_9_00154
yhbY		ribosome assembly RNA-binding protein YhbY	4	4	1	6	1675				290	290	290	e26b52046ef139bf63509f5b590c18e0_2993	935e3caf510be0c503c97acef35381b2_895	36ade0437952544bcc39850c777ef069_3273	S_aureus_9_00199
WP_000483052.1		APC family permease	4	4	1	6	2989				1829	1829	1829	e26b52046ef139bf63509f5b590c18e0_4849	935e3caf510be0c503c97acef35381b2_4779	36ade0437952544bcc39850c777ef069_5044	S_aureus_9_00407
WP_249741476.1		SarA family transcriptional regulator	4	4	1	6	364				743	743	743	e26b52046ef139bf63509f5b590c18e0_4550	935e3caf510be0c503c97acef35381b2_5080	36ade0437952544bcc39850c777ef069_4747	S_aureus_9_01879
WP_001134193.1		stage 0 sporulation family protein	4	4	1	6	2166				803	803	803	e26b52046ef139bf63509f5b590c18e0_826	935e3caf510be0c503c97acef35381b2_3234	36ade0437952544bcc39850c777ef069_886	S_aureus_9_02417
pbpH		penicillin-binding protein 2	4	4	1	6	1633				2075	2075	2075	e26b52046ef139bf63509f5b590c18e0_2909	935e3caf510be0c503c97acef35381b2_981	36ade0437952544bcc39850c777ef069_3189	S_aureus_9_00157
WP_000275708.1		pectate lyase	4	4	1	6	1478				1097	1097	1097	e26b52046ef139bf63509f5b590c18e0_3800	935e3caf510be0c503c97acef35381b2_111	36ade0437952544bcc39850c777ef069_4054	S_aureus_9_01951
modB		molybdate ABC transporter permease subunit	4	4	1	6	346				671	671	671	e26b52046ef139bf63509f5b590c18e0_4514	935e3caf510be0c503c97acef35381b2_5116	36ade0437952544bcc39850c777ef069_4711	S_aureus_9_01861
WP_000838479.1		DNA topoisomerase III	4	4	1	6	778				2135	2135	2135	e26b52046ef139bf63509f5b590c18e0_4462	935e3caf510be0c503c97acef35381b2_5168	36ade0437952544bcc39850c777ef069_4657	S_aureus_9_01838
WP_001793574.1		thermonuclease family protein	4	4	1	6	1183				686	686	686	e26b52046ef139bf63509f5b590c18e0_1521	935e3caf510be0c503c97acef35381b2_2499	36ade0437952544bcc39850c777ef069_1635	S_aureus_9_00863
cysS		cysteine--tRNA ligase	4	4	1	6	2120				1400	1400	1400	e26b52046ef139bf63509f5b590c18e0_956	935e3caf510be0c503c97acef35381b2_3092	36ade0437952544bcc39850c777ef069_1028	S_aureus_9_02272
WP_000283016.1		Y-family DNA polymerase	4	4	1	6	193				1262	1262	1262	e26b52046ef139bf63509f5b590c18e0_2498	935e3caf510be0c503c97acef35381b2_1503	36ade0437952544bcc39850c777ef069_2800	S_aureus_9_01921
WP_000285019.1		NAD(P)/FAD-dependent oxidoreductase	4	4	1	6	1833				1268	1268	1268	e26b52046ef139bf63509f5b590c18e0_3317	935e3caf510be0c503c97acef35381b2_570	36ade0437952544bcc39850c777ef069_3597	S_aureus_9_00343
WP_000258151.1		undecaprenyl/decaprenyl-phosphate alpha-N-acetylglucosaminyl 1-phosphate transferase	4	4	1	6	1114				1055	1055	1055	e26b52046ef139bf63509f5b590c18e0_1419	935e3caf510be0c503c97acef35381b2_2629	36ade0437952544bcc39850c777ef069_1489	S_aureus_9_01286
WP_001025061.1		MFS transporter	4	4	1	6	1837				1181	1181	1181	e26b52046ef139bf63509f5b590c18e0_3325	935e3caf510be0c503c97acef35381b2_562	36ade0437952544bcc39850c777ef069_3605	S_aureus_9_00347
trmFO		methylenetetrahydrofolate--tRNA-(uracil(54)-C(5))-methyltransferase (FADH(2)-oxidizing) TrmFO	4	4	1	6	320				1307	1307	1307	e26b52046ef139bf63509f5b590c18e0_2272	935e3caf510be0c503c97acef35381b2_1745	36ade0437952544bcc39850c777ef069_2522	S_aureus_9_00649
argF		ornithine carbamoyltransferase	4	4	1	6	338				1001	1001	1001	e26b52046ef139bf63509f5b590c18e0_2101	935e3caf510be0c503c97acef35381b2_1916	36ade0437952544bcc39850c777ef069_2353	S_aureus_9_00733
WP_001022971.1		NupC/NupG family nucleoside CNT transporter	4	4	1	6	2707				1220	1220	1220	e26b52046ef139bf63509f5b590c18e0_505	935e3caf510be0c503c97acef35381b2_3567	36ade0437952544bcc39850c777ef069_549	S_aureus_9_01596
WP_000656766.1		TetR/AcrR family transcriptional regulator	4	4	1	6	24				623	623	623	e26b52046ef139bf63509f5b590c18e0_4717	935e3caf510be0c503c97acef35381b2_4915	36ade0437952544bcc39850c777ef069_4910	S_aureus_9_01786
ruvB		Holliday junction branch migration DNA helicase RuvB	4	4	1	6	1721				1004	1004	1004	e26b52046ef139bf63509f5b590c18e0_3084	935e3caf510be0c503c97acef35381b2_802	36ade0437952544bcc39850c777ef069_3364	S_aureus_9_00242
WP_000589260.1		ABC transporter ATP-binding protein	4	4	1	6	1088				977	977	977	e26b52046ef139bf63509f5b590c18e0_1365	935e3caf510be0c503c97acef35381b2_2685	36ade0437952544bcc39850c777ef069_1433	S_aureus_9_01261
WP_001045423.1		alpha/beta hydrolase	4	4	1	6	2020				788	788	788	e26b52046ef139bf63509f5b590c18e0_1153	935e3caf510be0c503c97acef35381b2_2897	36ade0437952544bcc39850c777ef069_1221	S_aureus_9_02056
WP_000009238.1		hypothetical protein	4	4	1	6	1703				146	146	146	e26b52046ef139bf63509f5b590c18e0_3047	935e3caf510be0c503c97acef35381b2_839	36ade0437952544bcc39850c777ef069_3327	S_aureus_9_00226
sfaA		staphyloferrin A export MFS transporter	4	4	1	6	846				1193	1193	1193	e26b52046ef139bf63509f5b590c18e0_4328	935e3caf510be0c503c97acef35381b2_5302	36ade0437952544bcc39850c777ef069_4521	S_aureus_9_02319
sdpC		CPBP family intramembrane metalloprotease SdpC	4	4	1	6	403				1259	1259	1259	e26b52046ef139bf63509f5b590c18e0_4631	935e3caf510be0c503c97acef35381b2_5001	36ade0437952544bcc39850c777ef069_4826	S_aureus_9_01747
WP_064136614.1		HlyC/CorC family transporter	4	4	1	6	1048				1040	1040	1040	e26b52046ef139bf63509f5b590c18e0_1586	935e3caf510be0c503c97acef35381b2_2430	36ade0437952544bcc39850c777ef069_1834	S_aureus_9_00801
WP_001093562.1		DM13 domain-containing protein	4	4	1	6	1928				440	440	440	e26b52046ef139bf63509f5b590c18e0_1337	935e3caf510be0c503c97acef35381b2_2713	36ade0437952544bcc39850c777ef069_1405	S_aureus_9_01248
gltB		glutamate synthase large subunit	4	4	1	6	2181				4499	4499	4499	e26b52046ef139bf63509f5b590c18e0_781	935e3caf510be0c503c97acef35381b2_3279	36ade0437952544bcc39850c777ef069_841	S_aureus_9_02128
WP_000640487.1		acyl-CoA thioesterase	4	4	1	6	206				467	467	467	e26b52046ef139bf63509f5b590c18e0_2472	935e3caf510be0c503c97acef35381b2_1529	36ade0437952544bcc39850c777ef069_2774	S_aureus_9_01909
WP_000532966.1		YebC/PmpR family DNA-binding transcriptional regulator	4	4	1	6	1968				716	716	716	e26b52046ef139bf63509f5b590c18e0_1257	935e3caf510be0c503c97acef35381b2_2793	36ade0437952544bcc39850c777ef069_1325	S_aureus_9_02514
treC		alpha,alpha-phosphotrehalase	4	4	1	6	2178				1640	1640	1640	e26b52046ef139bf63509f5b590c18e0_790	935e3caf510be0c503c97acef35381b2_3270	36ade0437952544bcc39850c777ef069_850	S_aureus_9_02124
WP_064136540.1		NAD(P)/FAD-dependent oxidoreductase	4	4	1	6	3153				1508	1508	1508	e26b52046ef139bf63509f5b590c18e0_5109	935e3caf510be0c503c97acef35381b2_4535	36ade0437952544bcc39850c777ef069_5288	S_aureus_9_00524
scpB		SMC-Scp complex subunit ScpB	4	4	1	6	945				542	542	542	e26b52046ef139bf63509f5b590c18e0_2790	935e3caf510be0c503c97acef35381b2_1100	36ade0437952544bcc39850c777ef069_3068	S_aureus_9_00101
WP_000207845.1		GAF domain-containing protein	4	4	1	6	1792				464	464	464	e26b52046ef139bf63509f5b590c18e0_3235	935e3caf510be0c503c97acef35381b2_652	36ade0437952544bcc39850c777ef069_3515	S_aureus_9_00307
rimP		ribosome maturation factor RimP	4	4	1	6	304				467	467	467	e26b52046ef139bf63509f5b590c18e0_2304	935e3caf510be0c503c97acef35381b2_1713	36ade0437952544bcc39850c777ef069_2554	S_aureus_9_00635
WP_000128656.1		hypothetical protein	4	4	1	6	417				419	419	419	e26b52046ef139bf63509f5b590c18e0_4659	935e3caf510be0c503c97acef35381b2_4973	36ade0437952544bcc39850c777ef069_4854	S_aureus_9_01760
ffh		signal recognition particle protein	4	4	1	6	506				1367	1367	1367	e26b52046ef139bf63509f5b590c18e0_2244	935e3caf510be0c503c97acef35381b2_1773	36ade0437952544bcc39850c777ef069_2496	S_aureus_9_00661
obgE		GTPase ObgE	4	4	1	6	1724				1292	1292	1292	e26b52046ef139bf63509f5b590c18e0_3090	935e3caf510be0c503c97acef35381b2_796	36ade0437952544bcc39850c777ef069_3370	S_aureus_9_00245
ylqF		ribosome biogenesis GTPase YlqF	4	4	1	6	326				884	884	884	e26b52046ef139bf63509f5b590c18e0_2256	935e3caf510be0c503c97acef35381b2_1761	36ade0437952544bcc39850c777ef069_2510	S_aureus_9_00655
WP_000486494.1		ABC transporter ATP-binding protein/permease	4	4	1	6	2977				1733	1733	1733	e26b52046ef139bf63509f5b590c18e0_4825	935e3caf510be0c503c97acef35381b2_4803	36ade0437952544bcc39850c777ef069_5020	S_aureus_9_00396
WP_001107107.1		sucrose-specific PTS transporter subunit IIBC	4	4	1	6	26				1442	1442	1442	e26b52046ef139bf63509f5b590c18e0_4721	935e3caf510be0c503c97acef35381b2_4911	36ade0437952544bcc39850c777ef069_4914	S_aureus_9_01788
WP_000843611.1		nucleotidyltransferase	4	4	1	6	631				1139	1139	1139	e26b52046ef139bf63509f5b590c18e0_2013	935e3caf510be0c503c97acef35381b2_2004	36ade0437952544bcc39850c777ef069_2265	S_aureus_9_01027
WP_000138403.1		toxic anion resistance protein	4	4	1	6	152				1136	1136	1136	e26b52046ef139bf63509f5b590c18e0_2582	935e3caf510be0c503c97acef35381b2_1416	36ade0437952544bcc39850c777ef069_2884	S_aureus_9_00016
WP_000197961.1		ABC transporter permease	4	5	1.25	6	2579				350	761	618	e26b52046ef139bf63509f5b590c18e0_231	935e3caf510be0c503c97acef35381b2_3861	36ade0437952544bcc39850c777ef069_263	S_aureus_9_00912 S_aureus_9_00911
WP_000948299.1		NADH dehydrogenase subunit 5	4	4	1	6	2201				1484	1484	1484	e26b52046ef139bf63509f5b590c18e0_741	935e3caf510be0c503c97acef35381b2_3319	36ade0437952544bcc39850c777ef069_801	S_aureus_9_02146
graS		histidine kinase GraS/ApsS	4	4	1	6	1977				1040	1040	1040	e26b52046ef139bf63509f5b590c18e0_1239	935e3caf510be0c503c97acef35381b2_2811	36ade0437952544bcc39850c777ef069_1307	S_aureus_9_02014
WP_000186498.1		alpha/beta fold hydrolase family protein	4	4	1	6	2399				968	968	968	e26b52046ef139bf63509f5b590c18e0_27	935e3caf510be0c503c97acef35381b2_4193	36ade0437952544bcc39850c777ef069_27	S_aureus_9_01383
cidA		holin-like murein hydrolase modulator CidA	4	4	1	6	3175				395	395	395	e26b52046ef139bf63509f5b590c18e0_5065	935e3caf510be0c503c97acef35381b2_4577	36ade0437952544bcc39850c777ef069_5246	S_aureus_9_00503
WP_000034506.1		NAD(P)-dependent oxidoreductase	4	4	1	6	2991				851	851	851	e26b52046ef139bf63509f5b590c18e0_4853	935e3caf510be0c503c97acef35381b2_4775	36ade0437952544bcc39850c777ef069_5048	S_aureus_9_00409
desR		response regulator transcription factor	4	4	1	6	237				602	602	602	e26b52046ef139bf63509f5b590c18e0_2410	935e3caf510be0c503c97acef35381b2_1591	36ade0437952544bcc39850c777ef069_2712	S_aureus_9_02547
lukD		bi-component leukocidin LukED subunit D	4	4	1	6	2829				982	983	982	e26b52046ef139bf63509f5b590c18e0_3449	935e3caf510be0c503c97acef35381b2_424	36ade0437952544bcc39850c777ef069_3731	S_aureus_9_02219
WP_001283685.1		nitric oxide reductase activation protein NorD	4	4	1	6	150				1886	1886	1886	e26b52046ef139bf63509f5b590c18e0_2588	935e3caf510be0c503c97acef35381b2_1410	36ade0437952544bcc39850c777ef069_2888	S_aureus_9_00018
WP_000226909.1		DNA polymerase III subunit alpha	4	4	1	6	1776				3197	3197	3197	e26b52046ef139bf63509f5b590c18e0_3201	935e3caf510be0c503c97acef35381b2_686	36ade0437952544bcc39850c777ef069_3481	S_aureus_9_00292
ftsH		ATP-dependent zinc metalloprotease FtsH	4	4	1	6	2140				2093	2093	2093	e26b52046ef139bf63509f5b590c18e0_880	935e3caf510be0c503c97acef35381b2_3180	36ade0437952544bcc39850c777ef069_940	S_aureus_9_02391
infC		translation initiation factor IF-3	4	4	1	6	1754				527	560	535	e26b52046ef139bf63509f5b590c18e0_3154	935e3caf510be0c503c97acef35381b2_732	36ade0437952544bcc39850c777ef069_3434	S_aureus_9_00271
dnaI		primosomal protein DnaI	4	4	1	6	1758				920	920	920	e26b52046ef139bf63509f5b590c18e0_3163	935e3caf510be0c503c97acef35381b2_722	36ade0437952544bcc39850c777ef069_3443	S_aureus_9_00274
WP_000200684.1		PTS transporter subunit IIC	4	4	1	6	3144				1055	1055	1055	e26b52046ef139bf63509f5b590c18e0_5125	935e3caf510be0c503c97acef35381b2_4517	36ade0437952544bcc39850c777ef069_5306	S_aureus_9_00533
WP_000737654.1		metal ABC transporter substrate-binding protein	4	4	1	6	2006				929	929	929	e26b52046ef139bf63509f5b590c18e0_1181	935e3caf510be0c503c97acef35381b2_2869	36ade0437952544bcc39850c777ef069_1249	S_aureus_9_02042
WP_064136638.1		CDP-glycerol glycerophosphotransferase family protein	4	4	1	6	433				1673	1673	1673	e26b52046ef139bf63509f5b590c18e0_4699	935e3caf510be0c503c97acef35381b2_4935	36ade0437952544bcc39850c777ef069_4892	S_aureus_9_01778
WP_001008405.1		acyl--CoA ligase	4	4	1	6	2640				1505	1505	1505	e26b52046ef139bf63509f5b590c18e0_347	935e3caf510be0c503c97acef35381b2_3735	36ade0437952544bcc39850c777ef069_387	S_aureus_9_01146
hutH		histidine ammonia-lyase	4	4	1	6	2395				1514	1514	1514	e26b52046ef139bf63509f5b590c18e0_17	935e3caf510be0c503c97acef35381b2_4203	36ade0437952544bcc39850c777ef069_17	S_aureus_9_01379
WP_001048368.1		DUF4479 domain-containing tRNA-binding protein	4	4	1	6	1820				596	596	596	e26b52046ef139bf63509f5b590c18e0_3291	935e3caf510be0c503c97acef35381b2_596	36ade0437952544bcc39850c777ef069_3571	S_aureus_9_00330
metE		5-methyltetrahydropteroyltriglutamate--homocysteine S-methyltransferase	4	4	1	6	2750				2228	2228	2228	e26b52046ef139bf63509f5b590c18e0_591	935e3caf510be0c503c97acef35381b2_3481	36ade0437952544bcc39850c777ef069_635	S_aureus_9_01553
gatC_1		PTS galactitol transporter subunit IIC	4	4	1	6	2653				1259	1259	1259	e26b52046ef139bf63509f5b590c18e0_377	935e3caf510be0c503c97acef35381b2_3705	36ade0437952544bcc39850c777ef069_417	S_aureus_9_01159
WP_000831298.1		membrane protein	4	4	1	6	2982				659	659	659	e26b52046ef139bf63509f5b590c18e0_4835	935e3caf510be0c503c97acef35381b2_4793	36ade0437952544bcc39850c777ef069_5030	S_aureus_9_00400
WP_000553927.1		OsmC family protein	4	4	1	6	1795				446	446	446	e26b52046ef139bf63509f5b590c18e0_3241	935e3caf510be0c503c97acef35381b2_646	36ade0437952544bcc39850c777ef069_3521	S_aureus_9_00310
yut		urea transporter	4	4	1	6	354				905	905	905	e26b52046ef139bf63509f5b590c18e0_4530	935e3caf510be0c503c97acef35381b2_5100	36ade0437952544bcc39850c777ef069_4727	S_aureus_9_01869
WP_000141109.1		lipoate--protein ligase family protein	4	4	1	6	1613				830	830	830	e26b52046ef139bf63509f5b590c18e0_2868	935e3caf510be0c503c97acef35381b2_1022	36ade0437952544bcc39850c777ef069_3148	S_aureus_9_00139
purM		phosphoribosylformylglycinamidine cyclo-ligase	4	4	1	6	722				1028	1028	1028	e26b52046ef139bf63509f5b590c18e0_1904	935e3caf510be0c503c97acef35381b2_2113	36ade0437952544bcc39850c777ef069_2152	S_aureus_9_01079
cap8G		type 8 capsular polysaccharide synthesis protein Cap8G	4	4	1	6	2566				1124	1124	1124	e26b52046ef139bf63509f5b590c18e0_203	935e3caf510be0c503c97acef35381b2_3897	36ade0437952544bcc39850c777ef069_227	S_aureus_9_00930
WP_000216873.1		ABC transporter ATP-binding protein	4	4	1	6	2840				740	740	740	e26b52046ef139bf63509f5b590c18e0_3497	935e3caf510be0c503c97acef35381b2_376	36ade0437952544bcc39850c777ef069_3787	S_aureus_9_02237
hlgC		bi-component gamma-hemolysin HlgCB subunit C	4	4	1	6	2969				947	947	947	e26b52046ef139bf63509f5b590c18e0_4807	935e3caf510be0c503c97acef35381b2_4821	36ade0437952544bcc39850c777ef069_5002	S_aureus_9_00388
WP_000999168.1		multidrug effflux MFS transporter	4	4	1	6	423				1208	1208	1208	e26b52046ef139bf63509f5b590c18e0_4671	935e3caf510be0c503c97acef35381b2_4961	36ade0437952544bcc39850c777ef069_4866	S_aureus_9_01766
ftsA		cell division protein FtsA	4	4	1	6	455				1406	1412	1410	e26b52046ef139bf63509f5b590c18e0_2140	935e3caf510be0c503c97acef35381b2_1877	36ade0437952544bcc39850c777ef069_2392	S_aureus_9_00712
WP_000451303.1		RluA family pseudouridine synthase	4	4	1	6	466				917	917	917	e26b52046ef139bf63509f5b590c18e0_2164	935e3caf510be0c503c97acef35381b2_1853	36ade0437952544bcc39850c777ef069_2416	S_aureus_9_00701
WP_000110600.1		hypothetical protein	4	4	1	6	1653				698	698	698	e26b52046ef139bf63509f5b590c18e0_2949	935e3caf510be0c503c97acef35381b2_941	36ade0437952544bcc39850c777ef069_3229	S_aureus_9_00177
harA		haptoglobin-binding heme uptake protein HarA	4	4	1	6	1808				2681	2687	2685	e26b52046ef139bf63509f5b590c18e0_3263	935e3caf510be0c503c97acef35381b2_624	36ade0437952544bcc39850c777ef069_3543	S_aureus_9_00319
WP_001251224.1		glucosamine-6-phosphate isomerase	4	4	1	6	2859				599	599	599	e26b52046ef139bf63509f5b590c18e0_3533	935e3caf510be0c503c97acef35381b2_340	36ade0437952544bcc39850c777ef069_3823	S_aureus_9_02254
WP_001065268.1		glutathione peroxidase	4	4	1	6	3091				497	497	497	e26b52046ef139bf63509f5b590c18e0_5235	935e3caf510be0c503c97acef35381b2_4405	36ade0437952544bcc39850c777ef069_5418	S_aureus_9_00582
WP_000966695.1		YnfA family protein	4	4	1	6	407				326	326	326	e26b52046ef139bf63509f5b590c18e0_4639	935e3caf510be0c503c97acef35381b2_4993	36ade0437952544bcc39850c777ef069_4834	S_aureus_9_01751
WP_001021214.1		aldehyde dehydrogenase	4	4	1	6	1474				1379	1379	1379	e26b52046ef139bf63509f5b590c18e0_3808	935e3caf510be0c503c97acef35381b2_103	36ade0437952544bcc39850c777ef069_4062	S_aureus_9_01948
purL		phosphoribosylformylglycinamidine synthase subunit PurL	4	4	1	6	720				2189	2189	2189	e26b52046ef139bf63509f5b590c18e0_1900	935e3caf510be0c503c97acef35381b2_2117	36ade0437952544bcc39850c777ef069_2148	S_aureus_9_01081
gyrA		DNA gyrase subunit A	4	4	1	6	2393				2663	2663	2663	e26b52046ef139bf63509f5b590c18e0_13	935e3caf510be0c503c97acef35381b2_4207	36ade0437952544bcc39850c777ef069_13	S_aureus_9_01377
WP_000367419.1		BrxA/BrxB family bacilliredoxin	4	4	1	6	1595				437	437	437	e26b52046ef139bf63509f5b590c18e0_2832	935e3caf510be0c503c97acef35381b2_1058	36ade0437952544bcc39850c777ef069_3112	S_aureus_9_00121
WP_000477957.1		DUF3267 domain-containing protein	4	4	1	6	2843				557	557	557	e26b52046ef139bf63509f5b590c18e0_3503	935e3caf510be0c503c97acef35381b2_370	36ade0437952544bcc39850c777ef069_3793	S_aureus_9_02240
WP_001100526.1		ketoacyl-ACP synthase III	4	4	1	6	985				941	941	941	e26b52046ef139bf63509f5b590c18e0_1714	935e3caf510be0c503c97acef35381b2_2304	36ade0437952544bcc39850c777ef069_1962	S_aureus_9_02070
WP_001174258.1		YpdA family putative bacillithiol disulfide reductase	4	4	1	6	1385				986	986	986	e26b52046ef139bf63509f5b590c18e0_2735	935e3caf510be0c503c97acef35381b2_1263	36ade0437952544bcc39850c777ef069_3033	S_aureus_9_00086
rsmI		16S rRNA (cytidine(1402)-2'-O)-methyltransferase	4	4	1	6	2162				839	839	839	e26b52046ef139bf63509f5b590c18e0_834	935e3caf510be0c503c97acef35381b2_3226	36ade0437952544bcc39850c777ef069_894	S_aureus_9_02413
mroQ		CPBP family intramembrane metalloprotease MroQ	4	4	1	6	559				743	743	743	e26b52046ef139bf63509f5b590c18e0_3978	935e3caf510be0c503c97acef35381b2_5647	36ade0437952544bcc39850c777ef069_4164	S_aureus_9_01684
WP_000180679.1		2-oxoglutarate dehydrogenase E1 component	4	4	1	6	145				2798	2798	2798	e26b52046ef139bf63509f5b590c18e0_2598	935e3caf510be0c503c97acef35381b2_1400	36ade0437952544bcc39850c777ef069_2898	S_aureus_9_00023
WP_000659675.1		capsular polysaccharide biosynthesis protein CapA	4	4	1	6	2336				662	662	662	e26b52046ef139bf63509f5b590c18e0_5329	935e3caf510be0c503c97acef35381b2_4311	36ade0437952544bcc39850c777ef069_5512	S_aureus_9_01320
WP_000819690.1		spermidine/putrescine ABC transporter substrate-binding protein	4	4	1	6	654				1073	1073	1073	e26b52046ef139bf63509f5b590c18e0_1967	935e3caf510be0c503c97acef35381b2_2050	36ade0437952544bcc39850c777ef069_2219	S_aureus_9_01049
WP_000163416.1		nucleoside hydrolase	4	4	1	6	351				941	941	941	e26b52046ef139bf63509f5b590c18e0_4524	935e3caf510be0c503c97acef35381b2_5106	36ade0437952544bcc39850c777ef069_4721	S_aureus_9_01866
kdpA		potassium-transporting ATPase subunit KdpA	4	4	1	6	2913				1676	1676	1676	e26b52046ef139bf63509f5b590c18e0_4091	935e3caf510be0c503c97acef35381b2_5534	36ade0437952544bcc39850c777ef069_4283	S_aureus_9_01423
WP_000571218.1		methionine ABC transporter ATP-binding protein	4	4	1	6	1202				1025	1025	1025	e26b52046ef139bf63509f5b590c18e0_1562	935e3caf510be0c503c97acef35381b2_2454	36ade0437952544bcc39850c777ef069_1678	S_aureus_9_00841
leuC		3-isopropylmalate dehydratase large subunit	4	4	1	6	591				1370	1370	1370	e26b52046ef139bf63509f5b590c18e0_4040	935e3caf510be0c503c97acef35381b2_5585	36ade0437952544bcc39850c777ef069_4228	S_aureus_9_01712
WP_000066378.1		bifunctional 3-deoxy-7-phosphoheptulonate synthase/chorismate mutase	4	4	1	6	1814				1091	1091	1091	e26b52046ef139bf63509f5b590c18e0_3279	935e3caf510be0c503c97acef35381b2_608	36ade0437952544bcc39850c777ef069_3559	S_aureus_9_00325
WP_001051856.1		YtxH domain-containing protein	4	4	1	6	1830				422	422	422	e26b52046ef139bf63509f5b590c18e0_3311	935e3caf510be0c503c97acef35381b2_576	36ade0437952544bcc39850c777ef069_3591	S_aureus_9_00340
WP_001196354.1		proline dehydrogenase	4	4	1	6	1845				1001	1001	1001	e26b52046ef139bf63509f5b590c18e0_3339	935e3caf510be0c503c97acef35381b2_550	36ade0437952544bcc39850c777ef069_3615	S_aureus_9_02423
rnz		ribonuclease Z	4	4	1	6	1584				920	920	920	e26b52046ef139bf63509f5b590c18e0_2810	935e3caf510be0c503c97acef35381b2_1080	36ade0437952544bcc39850c777ef069_3088	S_aureus_9_00111
group_2452	ptsG	glucose-specific PTS transporter subunit IIBC	4	4	1	6	2595				2045	2045	2045	e26b52046ef139bf63509f5b590c18e0_263	935e3caf510be0c503c97acef35381b2_3829	36ade0437952544bcc39850c777ef069_295	S_aureus_9_00896
priA		primosomal protein N'	4	4	1	6	481				2408	2408	2408	e26b52046ef139bf63509f5b590c18e0_2194	935e3caf510be0c503c97acef35381b2_1823	36ade0437952544bcc39850c777ef069_2446	S_aureus_9_00686
icd		NADP-dependent isocitrate dehydrogenase	4	4	1	6	1768				1268	1268	1268	e26b52046ef139bf63509f5b590c18e0_3183	935e3caf510be0c503c97acef35381b2_702	36ade0437952544bcc39850c777ef069_3463	S_aureus_9_00284
thiD		bifunctional hydroxymethylpyrimidine kinase/phosphomethylpyrimidine kinase	4	4	1	6	2897				830	830	830	e26b52046ef139bf63509f5b590c18e0_4123	935e3caf510be0c503c97acef35381b2_5502	36ade0437952544bcc39850c777ef069_4315	S_aureus_9_01438
pyrF		orotidine-5'-phosphate decarboxylase	4	4	1	6	473				692	692	692	e26b52046ef139bf63509f5b590c18e0_2178	935e3caf510be0c503c97acef35381b2_1839	36ade0437952544bcc39850c777ef069_2430	S_aureus_9_00694
WP_000278558.1		NarK/NasA family nitrate transporter	4	4	1	6	35				1169	1169	1169	e26b52046ef139bf63509f5b590c18e0_4739	935e3caf510be0c503c97acef35381b2_4893	36ade0437952544bcc39850c777ef069_4932	S_aureus_9_00355
WP_000593366.1		Cof-type HAD-IIB family hydrolase	4	4	1	6	2090				869	869	869	e26b52046ef139bf63509f5b590c18e0_1017	935e3caf510be0c503c97acef35381b2_3031	36ade0437952544bcc39850c777ef069_1089	S_aureus_9_02500
WP_000691839.1		LysR family transcriptional regulator	4	4	1	6	401				884	884	884	e26b52046ef139bf63509f5b590c18e0_4625	935e3caf510be0c503c97acef35381b2_5005	36ade0437952544bcc39850c777ef069_4822	S_aureus_9_01745
WP_000764419.1		class I SAM-dependent methyltransferase	4	4	1	6	1842				386	563	518	e26b52046ef139bf63509f5b590c18e0_3329	935e3caf510be0c503c97acef35381b2_558	36ade0437952544bcc39850c777ef069_3609	S_aureus_9_00349
WP_000037079.1		YihY/virulence factor BrkB family protein	4	4	1	6	1515				1211	1217	1215	e26b52046ef139bf63509f5b590c18e0_3722	935e3caf510be0c503c97acef35381b2_189	36ade0437952544bcc39850c777ef069_3976	S_aureus_9_01986
spn		myeloperoxidase inhibitor SPIN	4	4	1	6	2217				308	308	308	e26b52046ef139bf63509f5b590c18e0_715	935e3caf510be0c503c97acef35381b2_3349	36ade0437952544bcc39850c777ef069_759	S_aureus_9_02163
radC		DNA repair protein RadC	4	4	1	6	1734				686	686	686	e26b52046ef139bf63509f5b590c18e0_3111	935e3caf510be0c503c97acef35381b2_775	36ade0437952544bcc39850c777ef069_3391	S_aureus_9_00253
WP_001283312.1		ATP-dependent RecD-like DNA helicase	4	4	1	6	1698				2477	2477	2477	e26b52046ef139bf63509f5b590c18e0_3037	935e3caf510be0c503c97acef35381b2_849	36ade0437952544bcc39850c777ef069_3317	S_aureus_9_00221
WP_000819843.1		DUF4467 domain-containing protein	4	4	1	6	58				362	362	362	e26b52046ef139bf63509f5b590c18e0_4783	935e3caf510be0c503c97acef35381b2_4845	36ade0437952544bcc39850c777ef069_4976	S_aureus_9_00377
WP_001228169.1		alpha/beta hydrolase	4	4	1	6	3181				968	968	968	e26b52046ef139bf63509f5b590c18e0_5053	935e3caf510be0c503c97acef35381b2_4589	36ade0437952544bcc39850c777ef069_5234	S_aureus_9_00497
pxpA		5-oxoprolinase subunit PxpA	4	4	1	6	1684				752	752	752	e26b52046ef139bf63509f5b590c18e0_3009	935e3caf510be0c503c97acef35381b2_877	36ade0437952544bcc39850c777ef069_3289	S_aureus_9_00207
WP_000829645.1		ABC transporter permease	4	4	1	6	981				1070	1070	1070	e26b52046ef139bf63509f5b590c18e0_1722	935e3caf510be0c503c97acef35381b2_2296	36ade0437952544bcc39850c777ef069_1970	S_aureus_9_02074
clpB		ATP-dependent chaperone ClpB	4	4	1	6	993				2609	2609	2609	e26b52046ef139bf63509f5b590c18e0_1698	935e3caf510be0c503c97acef35381b2_2320	36ade0437952544bcc39850c777ef069_1946	S_aureus_9_00746
pdhC_1		2-oxo acid dehydrogenase subunit E2	4	4	1	6	1596				1274	1274	1274	e26b52046ef139bf63509f5b590c18e0_2834	935e3caf510be0c503c97acef35381b2_1056	36ade0437952544bcc39850c777ef069_3114	S_aureus_9_00122
WP_001834463.1		prolyl oligopeptidase family serine peptidase	4	4	1	6	1867				746	770	752	e26b52046ef139bf63509f5b590c18e0_3389	935e3caf510be0c503c97acef35381b2_504	36ade0437952544bcc39850c777ef069_3661	S_aureus_9_02446
trpE		anthranilate synthase component I	4	4	1	6	190				1406	1406	1406	e26b52046ef139bf63509f5b590c18e0_2504	935e3caf510be0c503c97acef35381b2_1497	36ade0437952544bcc39850c777ef069_2806	S_aureus_9_01924
WP_001291497.1		M20 family metallopeptidase	4	4	1	6	72				1184	1184	1184	e26b52046ef139bf63509f5b590c18e0_4204	935e3caf510be0c503c97acef35381b2_5421	36ade0437952544bcc39850c777ef069_4396	S_aureus_9_01477
WP_000076923.1		ThiF family adenylyltransferase	4	4	1	6	754				1004	1004	1004	e26b52046ef139bf63509f5b590c18e0_4510	935e3caf510be0c503c97acef35381b2_5120	36ade0437952544bcc39850c777ef069_4707	S_aureus_9_01859
WP_000572040.1		formate/nitrite transporter family protein	4	4	1	6	49				824	824	824	e26b52046ef139bf63509f5b590c18e0_4765	935e3caf510be0c503c97acef35381b2_4863	36ade0437952544bcc39850c777ef069_4958	S_aureus_9_00370
WP_001242311.1		pyrimidine-nucleoside phosphorylase	4	4	1	6	75				1301	1301	1301	e26b52046ef139bf63509f5b590c18e0_4210	935e3caf510be0c503c97acef35381b2_5415	36ade0437952544bcc39850c777ef069_4402	S_aureus_9_01480
gltX		glutamate--tRNA ligase	4	4	1	6	2122				1454	1454	1454	e26b52046ef139bf63509f5b590c18e0_952	935e3caf510be0c503c97acef35381b2_3096	36ade0437952544bcc39850c777ef069_1024	S_aureus_9_02270
WP_000678232.1		SDR family oxidoreductase	4	4	1	6	937				755	755	755	e26b52046ef139bf63509f5b590c18e0_2806	935e3caf510be0c503c97acef35381b2_1084	36ade0437952544bcc39850c777ef069_3084	S_aureus_9_00109
WP_000215724.1		4'-phosphopantetheinyl transferase superfamily protein	4	4	1	6	2585				644	644	644	e26b52046ef139bf63509f5b590c18e0_243	935e3caf510be0c503c97acef35381b2_3849	36ade0437952544bcc39850c777ef069_275	S_aureus_9_00905
nagB		glucosamine-6-phosphate deaminase	4	4	1	6	2080				758	758	758	e26b52046ef139bf63509f5b590c18e0_1037	935e3caf510be0c503c97acef35381b2_3011	36ade0437952544bcc39850c777ef069_1109	S_aureus_9_02173
groL		chaperonin GroEL	4	4	1	6	557				1616	1616	1616	e26b52046ef139bf63509f5b590c18e0_3974	935e3caf510be0c503c97acef35381b2_5651	36ade0437952544bcc39850c777ef069_4160	S_aureus_9_01682
WP_001793444.1		excalibur calcium-binding domain-containing protein	4	4	1	6	1873				614	650	641	e26b52046ef139bf63509f5b590c18e0_3401	935e3caf510be0c503c97acef35381b2_492	36ade0437952544bcc39850c777ef069_3673	S_aureus_9_02452
isdC		heme uptake protein IsdC	4	4	1	6	626				683	683	683	e26b52046ef139bf63509f5b590c18e0_2023	935e3caf510be0c503c97acef35381b2_1994	36ade0437952544bcc39850c777ef069_2275	S_aureus_9_01022
WP_000924220.1		deoxyribonuclease IV	4	4	1	6	1638				890	890	890	e26b52046ef139bf63509f5b590c18e0_2919	935e3caf510be0c503c97acef35381b2_971	36ade0437952544bcc39850c777ef069_3199	S_aureus_9_00162
WP_001092004.1		DUF2294 domain-containing protein	4	4	1	6	2581				359	359	359	e26b52046ef139bf63509f5b590c18e0_235	935e3caf510be0c503c97acef35381b2_3857	36ade0437952544bcc39850c777ef069_267	S_aureus_9_00909
WP_000174053.1		phosphoribosylaminoimidazolesuccinocarboxamide synthase	4	4	1	6	717				704	704	704	e26b52046ef139bf63509f5b590c18e0_1894	935e3caf510be0c503c97acef35381b2_2123	36ade0437952544bcc39850c777ef069_2142	S_aureus_9_01084
group_2484	lpdA	dihydrolipoyl dehydrogenase	4	4	1	6	1599				1421	1421	1421	e26b52046ef139bf63509f5b590c18e0_2840	935e3caf510be0c503c97acef35381b2_1050	36ade0437952544bcc39850c777ef069_3120	S_aureus_9_00125
WP_001239285.1		TDT family transporter	4	4	1	6	342				947	947	947	e26b52046ef139bf63509f5b590c18e0_2109	935e3caf510be0c503c97acef35381b2_1908	36ade0437952544bcc39850c777ef069_2361	S_aureus_9_00729
WP_001820550.1		DNA polymerase III subunit alpha	4	4	1	6	305				4310	4316	4311	e26b52046ef139bf63509f5b590c18e0_2302	935e3caf510be0c503c97acef35381b2_1715	36ade0437952544bcc39850c777ef069_2552	S_aureus_9_00636
truB		tRNA pseudouridine(55) synthase TruB	4	4	1	6	298				917	917	917	e26b52046ef139bf63509f5b590c18e0_2316	935e3caf510be0c503c97acef35381b2_1701	36ade0437952544bcc39850c777ef069_2566	S_aureus_9_00629
fmtA		teichoic acid D-Ala esterase FmtA	4	4	1	6	707				1193	1193	1193	e26b52046ef139bf63509f5b590c18e0_1874	935e3caf510be0c503c97acef35381b2_2143	36ade0437952544bcc39850c777ef069_2122	S_aureus_9_01093
WP_001218596.1		glycerol-3-phosphate dehydrogenase/oxidase	4	4	1	6	270				1673	1673	1673	e26b52046ef139bf63509f5b590c18e0_2374	935e3caf510be0c503c97acef35381b2_1643	36ade0437952544bcc39850c777ef069_2624	S_aureus_9_02350
WP_000206033.1		acyl-CoA thioesterase	4	4	1	6	3179				410	410	410	e26b52046ef139bf63509f5b590c18e0_5057	935e3caf510be0c503c97acef35381b2_4585	36ade0437952544bcc39850c777ef069_5238	S_aureus_9_00499
zwf		glucose-6-phosphate dehydrogenase	4	4	1	6	1585				1484	1484	1484	e26b52046ef139bf63509f5b590c18e0_2812	935e3caf510be0c503c97acef35381b2_1078	36ade0437952544bcc39850c777ef069_3090	S_aureus_9_00112
WP_001793428.1		aminopeptidase	4	4	1	6	1519				1247	1256	1253	e26b52046ef139bf63509f5b590c18e0_3714	935e3caf510be0c503c97acef35381b2_197	36ade0437952544bcc39850c777ef069_3968	S_aureus_9_01990
mnmE		tRNA uridine-5-carboxymethylaminomethyl(34) synthesis GTPase MnmE	4	4	1	6	2385				1379	1379	1379	e26b52046ef139bf63509f5b590c18e0_5425	935e3caf510be0c503c97acef35381b2_4223	36ade0437952544bcc39850c777ef069_5608	S_aureus_9_01369
WP_000477931.1		ABC transporter permease	4	4	1	6	2701				1049	1049	1049	e26b52046ef139bf63509f5b590c18e0_493	935e3caf510be0c503c97acef35381b2_3579	36ade0437952544bcc39850c777ef069_537	S_aureus_9_01601
purH		bifunctional phosphoribosylaminoimidazolecarboxamide formyltransferase/IMP cyclohydrolase	4	4	1	6	724				1478	1478	1478	e26b52046ef139bf63509f5b590c18e0_1908	935e3caf510be0c503c97acef35381b2_2109	36ade0437952544bcc39850c777ef069_2156	S_aureus_9_01077
serS		serine--tRNA ligase	4	4	1	6	2396				1286	1286	1286	e26b52046ef139bf63509f5b590c18e0_20	935e3caf510be0c503c97acef35381b2_4200	36ade0437952544bcc39850c777ef069_20	S_aureus_9_01380
WP_000664780.1		insulinase family protein	4	4	1	6	290				1286	1286	1286	e26b52046ef139bf63509f5b590c18e0_2332	935e3caf510be0c503c97acef35381b2_1685	36ade0437952544bcc39850c777ef069_2582	S_aureus_9_00621
lacA		galactose-6-phosphate isomerase subunit LacA	4	4	1	6	831				428	428	428	e26b52046ef139bf63509f5b590c18e0_4360	935e3caf510be0c503c97acef35381b2_5272	36ade0437952544bcc39850c777ef069_4551	S_aureus_9_02304
msrB		peptide-methionine (R)-S-oxide reductase MsrB	4	4	1	6	134				428	428	428	e26b52046ef139bf63509f5b590c18e0_2620	935e3caf510be0c503c97acef35381b2_1376	36ade0437952544bcc39850c777ef069_2920	S_aureus_9_00033
WP_000606890.1		isochorismatase family protein	4	4	1	6	2592				557	557	557	e26b52046ef139bf63509f5b590c18e0_257	935e3caf510be0c503c97acef35381b2_3835	36ade0437952544bcc39850c777ef069_289	S_aureus_9_00898
hemY		protoporphyrinogen oxidase	4	4	1	6	2834				1400	1400	1400	e26b52046ef139bf63509f5b590c18e0_3485	935e3caf510be0c503c97acef35381b2_388	36ade0437952544bcc39850c777ef069_3775	S_aureus_9_02232
WP_000604515.1		aminodeoxychorismate/anthranilate synthase component II	4	4	1	6	1079				593	593	593	e26b52046ef139bf63509f5b590c18e0_1347	935e3caf510be0c503c97acef35381b2_2703	36ade0437952544bcc39850c777ef069_1415	S_aureus_9_01253
WP_000070966.1		1,4-dihydroxy-2-naphthoate polyprenyltransferase	4	4	1	6	692				938	938	938	e26b52046ef139bf63509f5b590c18e0_1840	935e3caf510be0c503c97acef35381b2_2177	36ade0437952544bcc39850c777ef069_2088	S_aureus_9_01108
group_2502	brnQ	branched-chain amino acid transport system II carrier protein	4	4	1	6	151				1343	1343	1343	e26b52046ef139bf63509f5b590c18e0_2586	935e3caf510be0c503c97acef35381b2_1412	36ade0437952544bcc39850c777ef069_2886	S_aureus_9_00017
cmk		(d)CMP kinase	4	4	1	6	1383				659	659	659	e26b52046ef139bf63509f5b590c18e0_2731	935e3caf510be0c503c97acef35381b2_1267	36ade0437952544bcc39850c777ef069_3029	S_aureus_9_00084
mvaA		hydroxymethylglutaryl-CoA reductase, degradative	4	4	1	6	3171				1277	1280	1278	e26b52046ef139bf63509f5b590c18e0_5075	935e3caf510be0c503c97acef35381b2_4569	36ade0437952544bcc39850c777ef069_5254	S_aureus_9_00507
WP_001030469.1		hypothetical protein	4	4	1	6	1857				443	443	443	e26b52046ef139bf63509f5b590c18e0_3366	935e3caf510be0c503c97acef35381b2_525	36ade0437952544bcc39850c777ef069_3640	S_aureus_9_02436
mnmA		tRNA 2-thiouridine(34) synthase MnmA	4	4	1	6	1700				1118	1118	1118	e26b52046ef139bf63509f5b590c18e0_3041	935e3caf510be0c503c97acef35381b2_845	36ade0437952544bcc39850c777ef069_3321	S_aureus_9_00223
nikE		dipeptide/oligopeptide/nickel ABC transporter ATP-binding protein	4	4	1	6	179				701	701	701	e26b52046ef139bf63509f5b590c18e0_2526	935e3caf510be0c503c97acef35381b2_1473	36ade0437952544bcc39850c777ef069_2828	S_aureus_9_01935
WP_000569649.1		DNA-directed RNA polymerase subunit alpha	4	4	1	6	808				944	944	944	e26b52046ef139bf63509f5b590c18e0_4402	935e3caf510be0c503c97acef35381b2_5228	36ade0437952544bcc39850c777ef069_4597	S_aureus_9_01808
tpx		thiol peroxidase	4	4	1	6	1787				494	494	494	e26b52046ef139bf63509f5b590c18e0_3223	935e3caf510be0c503c97acef35381b2_664	36ade0437952544bcc39850c777ef069_3503	S_aureus_9_00302
WP_001236371.1		aromatic acid exporter family protein	4	4	1	6	1533				1094	1145	1106	e26b52046ef139bf63509f5b590c18e0_3650	935e3caf510be0c503c97acef35381b2_227	36ade0437952544bcc39850c777ef069_3938	S_aureus_9_02004
lysS		lysine--tRNA ligase	4	4	1	6	2133				1487	1487	1487	e26b52046ef139bf63509f5b590c18e0_894	935e3caf510be0c503c97acef35381b2_3166	36ade0437952544bcc39850c777ef069_954	S_aureus_9_02385
secY2		accessory Sec system protein translocase subunit SecY2	4	4	1	6	2325				1211	1211	1211	e26b52046ef139bf63509f5b590c18e0_5307	935e3caf510be0c503c97acef35381b2_4333	36ade0437952544bcc39850c777ef069_5490	S_aureus_9_00615
WP_000971550.1		pyridoxal phosphate-dependent aminotransferase family protein	4	4	1	6	2973				1115	1115	1115	e26b52046ef139bf63509f5b590c18e0_4815	935e3caf510be0c503c97acef35381b2_4813	36ade0437952544bcc39850c777ef069_5010	S_aureus_9_00392
WP_001793221.1		acyl CoA:acetate/3-ketoacid CoA transferase	4	4	1	6	2641				1562	1577	1573	e26b52046ef139bf63509f5b590c18e0_349	935e3caf510be0c503c97acef35381b2_3733	36ade0437952544bcc39850c777ef069_389	S_aureus_9_01147
pta		phosphate acetyltransferase	4	4	1	6	2062				986	986	986	e26b52046ef139bf63509f5b590c18e0_1073	935e3caf510be0c503c97acef35381b2_2975	36ade0437952544bcc39850c777ef069_1145	S_aureus_9_02191
pde2		pApA hydrolase Pde2	4	4	1	6	1777				941	941	941	e26b52046ef139bf63509f5b590c18e0_3203	935e3caf510be0c503c97acef35381b2_684	36ade0437952544bcc39850c777ef069_3483	S_aureus_9_00293
sdaAB		L-serine ammonia-lyase, iron-sulfur-dependent subunit beta	4	4	1	6	3185				680	680	680	e26b52046ef139bf63509f5b590c18e0_5045	935e3caf510be0c503c97acef35381b2_4597	36ade0437952544bcc39850c777ef069_5226	S_aureus_9_00493
trpB		tryptophan synthase subunit beta	4	4	1	6	185				1214	1214	1214	e26b52046ef139bf63509f5b590c18e0_2514	935e3caf510be0c503c97acef35381b2_1487	36ade0437952544bcc39850c777ef069_2816	S_aureus_9_01929
fabG		3-oxoacyl-[acyl-carrier-protein] reductase	4	4	1	6	500				734	734	734	e26b52046ef139bf63509f5b590c18e0_2232	935e3caf510be0c503c97acef35381b2_1785	36ade0437952544bcc39850c777ef069_2484	S_aureus_9_00667
WP_001185692.1		sodium:proton antiporter	4	4	1	6	2988				2078	2078	2078	e26b52046ef139bf63509f5b590c18e0_4847	935e3caf510be0c503c97acef35381b2_4781	36ade0437952544bcc39850c777ef069_5042	S_aureus_9_00406
WP_000422908.1		nitroreductase	4	4	1	6	1196				539	539	539	e26b52046ef139bf63509f5b590c18e0_1549	935e3caf510be0c503c97acef35381b2_2471	36ade0437952544bcc39850c777ef069_1663	S_aureus_9_00849
WP_000651837.1		NmrA/HSCARG family protein	4	4	1	6	3139				821	821	821	e26b52046ef139bf63509f5b590c18e0_5137	935e3caf510be0c503c97acef35381b2_4505	36ade0437952544bcc39850c777ef069_5318	S_aureus_9_00538
WP_000166888.1		ABC transporter permease subunit	4	4	1	6	2621				1268	1268	1268	e26b52046ef139bf63509f5b590c18e0_303	935e3caf510be0c503c97acef35381b2_3775	36ade0437952544bcc39850c777ef069_349	S_aureus_9_01128
WP_000199070.1		acetyl-CoA C-acetyltransferase	4	4	1	6	2748				1181	1181	1181	e26b52046ef139bf63509f5b590c18e0_587	935e3caf510be0c503c97acef35381b2_3485	36ade0437952544bcc39850c777ef069_631	S_aureus_9_01555
WP_001222133.1		hypothetical protein	4	4	1	6	2021				716	716	716	e26b52046ef139bf63509f5b590c18e0_1151	935e3caf510be0c503c97acef35381b2_2899	36ade0437952544bcc39850c777ef069_1219	S_aureus_9_02057
WP_000364542.1		adenine phosphoribosyltransferase	4	4	1	6	1715				518	518	518	e26b52046ef139bf63509f5b590c18e0_3072	935e3caf510be0c503c97acef35381b2_814	36ade0437952544bcc39850c777ef069_3352	S_aureus_9_00236
WP_000544969.1		type 1 glutamine amidotransferase	4	4	1	6	1507				731	731	731	e26b52046ef139bf63509f5b590c18e0_3740	935e3caf510be0c503c97acef35381b2_171	36ade0437952544bcc39850c777ef069_3994	S_aureus_9_01978
menH		2-succinyl-6-hydroxy-2,4-cyclohexadiene-1-carboxylate synthase	4	4	1	6	695				803	803	803	e26b52046ef139bf63509f5b590c18e0_1848	935e3caf510be0c503c97acef35381b2_2169	36ade0437952544bcc39850c777ef069_2096	S_aureus_9_01105
WP_000417016.1		2-hydroxyacid dehydrogenase family protein	4	4	1	6	372				953	953	953	e26b52046ef139bf63509f5b590c18e0_4566	935e3caf510be0c503c97acef35381b2_5064	36ade0437952544bcc39850c777ef069_4763	S_aureus_9_01717
ligA		NAD-dependent DNA ligase LigA	4	4	1	6	1492				2003	2003	2003	e26b52046ef139bf63509f5b590c18e0_3770	935e3caf510be0c503c97acef35381b2_141	36ade0437952544bcc39850c777ef069_4024	S_aureus_9_01965
group_2530	argF	ornithine carbamoyltransferase	4	4	1	6	3075				1010	1010	1010	e26b52046ef139bf63509f5b590c18e0_5267	935e3caf510be0c503c97acef35381b2_4373	36ade0437952544bcc39850c777ef069_5450	S_aureus_9_00596
WP_000516795.1		DUF4889 domain-containing protein	4	4	1	6	1346				332	332	332	e26b52046ef139bf63509f5b590c18e0_2658	935e3caf510be0c503c97acef35381b2_1336	36ade0437952544bcc39850c777ef069_2960	S_aureus_9_00051
WP_064136612.1		D-glycerate dehydrogenase	4	4	1	6	1038				959	959	959	e26b52046ef139bf63509f5b590c18e0_1608	935e3caf510be0c503c97acef35381b2_2410	36ade0437952544bcc39850c777ef069_1854	S_aureus_9_00790
rbsU		ribose transporter RbsU	4	4	1	6	2677				881	881	881	e26b52046ef139bf63509f5b590c18e0_425	935e3caf510be0c503c97acef35381b2_3657	36ade0437952544bcc39850c777ef069_465	S_aureus_9_01182
WP_000571167.1		ABC transporter ATP-binding protein	4	4	1	6	682				641	641	641	e26b52046ef139bf63509f5b590c18e0_1822	935e3caf510be0c503c97acef35381b2_2195	36ade0437952544bcc39850c777ef069_2074	S_aureus_9_02577
WP_000125708.1		glyoxalase/bleomycin resistance/extradiol dioxygenase family protein	4	4	1	6	3123				449	449	449	e26b52046ef139bf63509f5b590c18e0_5169	935e3caf510be0c503c97acef35381b2_4473	36ade0437952544bcc39850c777ef069_5350	S_aureus_9_00554
gmk		guanylate kinase	4	4	1	6	478				623	623	623	e26b52046ef139bf63509f5b590c18e0_2188	935e3caf510be0c503c97acef35381b2_1829	36ade0437952544bcc39850c777ef069_2440	S_aureus_9_00689
WP_000414174.1		bifunctional metallophosphatase/5'-nucleotidase	4	4	1	6	671				1511	1514	1511	e26b52046ef139bf63509f5b590c18e0_1794	935e3caf510be0c503c97acef35381b2_2223	36ade0437952544bcc39850c777ef069_2046	S_aureus_9_02110
WP_000134779.1		DUF1292 domain-containing protein	4	4	1	6	1694				308	308	308	e26b52046ef139bf63509f5b590c18e0_3029	935e3caf510be0c503c97acef35381b2_857	36ade0437952544bcc39850c777ef069_3309	S_aureus_9_00217
WP_000202029.1		AbgT family transporter	4	4	1	6	3027				1538	1538	1538	e26b52046ef139bf63509f5b590c18e0_4917	935e3caf510be0c503c97acef35381b2_4711	36ade0437952544bcc39850c777ef069_5112	S_aureus_9_00439
yfkAB		radical SAM/CxCxxxxC motif protein YfkAB	4	4	1	6	1521				1121	1151	1143	e26b52046ef139bf63509f5b590c18e0_3710	935e3caf510be0c503c97acef35381b2_201	36ade0437952544bcc39850c777ef069_3964	S_aureus_9_01992
ileS		isoleucine--tRNA ligase	4	4	1	6	463				2753	2753	2753	e26b52046ef139bf63509f5b590c18e0_2156	935e3caf510be0c503c97acef35381b2_1861	36ade0437952544bcc39850c777ef069_2408	S_aureus_9_00704
lip2		YSIRK domain-containing triacylglycerol lipase Lip2/Geh	4	4	1	6	2714				2072	2075	2072	e26b52046ef139bf63509f5b590c18e0_519	935e3caf510be0c503c97acef35381b2_3553	36ade0437952544bcc39850c777ef069_563	S_aureus_9_01589
WP_000857620.1		amino acid ABC transporter ATP-binding/permease protein	4	4	1	6	1951				1673	1673	1673	e26b52046ef139bf63509f5b590c18e0_1291	935e3caf510be0c503c97acef35381b2_2759	36ade0437952544bcc39850c777ef069_1359	S_aureus_9_01225
WP_000901764.1		endonuclease III domain-containing protein	4	4	1	6	2027				635	635	635	e26b52046ef139bf63509f5b590c18e0_1139	935e3caf510be0c503c97acef35381b2_2911	36ade0437952544bcc39850c777ef069_1207	S_aureus_9_02063
floA		flotillin-like protein FloA	4	4	1	6	1654				989	989	989	e26b52046ef139bf63509f5b590c18e0_2951	935e3caf510be0c503c97acef35381b2_939	36ade0437952544bcc39850c777ef069_3231	S_aureus_9_00178
cap8M		type 8 capsular polysaccharide synthesis protein Cap8M	4	4	1	6	2568				557	557	557	e26b52046ef139bf63509f5b590c18e0_207	935e3caf510be0c503c97acef35381b2_3885	36ade0437952544bcc39850c777ef069_239	S_aureus_9_00924
bshC		bacillithiol biosynthesis cysteine-adding enzyme BshC	4	4	1	6	447				1613	1613	1613	e26b52046ef139bf63509f5b590c18e0_2124	935e3caf510be0c503c97acef35381b2_1893	36ade0437952544bcc39850c777ef069_2376	S_aureus_9_00720
mnhG2		Na+/H+ antiporter Mnh2 subunit G	4	4	1	6	2008				437	437	437	e26b52046ef139bf63509f5b590c18e0_1177	935e3caf510be0c503c97acef35381b2_2873	36ade0437952544bcc39850c777ef069_1245	S_aureus_9_02044
WP_000590515.1		ABC transporter ATP-binding protein	4	4	1	6	3017				749	749	749	e26b52046ef139bf63509f5b590c18e0_4897	935e3caf510be0c503c97acef35381b2_4731	36ade0437952544bcc39850c777ef069_5092	S_aureus_9_00429
WP_001016005.1		GNAT family N-acetyltransferase	4	4	1	6	1811				632	632	632	e26b52046ef139bf63509f5b590c18e0_3271	935e3caf510be0c503c97acef35381b2_616	36ade0437952544bcc39850c777ef069_3551	S_aureus_9_00322
WP_078153768.1		DUF1128 family protein	4	4	1	6	1518				200	206	201	e26b52046ef139bf63509f5b590c18e0_3716	935e3caf510be0c503c97acef35381b2_195	36ade0437952544bcc39850c777ef069_3970	S_aureus_9_01989
WP_000791621.1		energy-coupling factor transporter transmembrane protein EcfT	4	4	1	6	812				806	806	806	e26b52046ef139bf63509f5b590c18e0_4394	935e3caf510be0c503c97acef35381b2_5236	36ade0437952544bcc39850c777ef069_4589	S_aureus_9_01804
WP_001044662.1		YitT family protein	4	4	1	6	1991				833	833	833	e26b52046ef139bf63509f5b590c18e0_1211	935e3caf510be0c503c97acef35381b2_2839	36ade0437952544bcc39850c777ef069_1279	S_aureus_9_02028
WP_000684056.1		2-dehydropantoate 2-reductase	4	4	1	6	2992				935	935	935	e26b52046ef139bf63509f5b590c18e0_4855	935e3caf510be0c503c97acef35381b2_4773	36ade0437952544bcc39850c777ef069_5050	S_aureus_9_00410
group_2553	budA	acetolactate decarboxylase	4	4	1	6	3116				704	704	704	e26b52046ef139bf63509f5b590c18e0_5183	935e3caf510be0c503c97acef35381b2_4455	36ade0437952544bcc39850c777ef069_5366	S_aureus_9_00562
WP_000793175.1		DUF3021 domain-containing protein	4	4	1	6	436				455	455	455	e26b52046ef139bf63509f5b590c18e0_4693	935e3caf510be0c503c97acef35381b2_4941	36ade0437952544bcc39850c777ef069_4886	S_aureus_9_01775
WP_000149503.1		protein arginine kinase	4	4	1	6	2126				1007	1010	1007	e26b52046ef139bf63509f5b590c18e0_944	935e3caf510be0c503c97acef35381b2_3104	36ade0437952544bcc39850c777ef069_1016	S_aureus_9_02266
murB		UDP-N-acetylmuramate dehydrogenase	4	4	1	6	1105				923	923	923	e26b52046ef139bf63509f5b590c18e0_1401	935e3caf510be0c503c97acef35381b2_2647	36ade0437952544bcc39850c777ef069_1471	S_aureus_9_01277
cntA		staphylopine-dependent metal ABC transporter substrate-binding protein CntA	4	4	1	6	3021				1598	1598	1598	e26b52046ef139bf63509f5b590c18e0_4905	935e3caf510be0c503c97acef35381b2_4723	36ade0437952544bcc39850c777ef069_5100	S_aureus_9_00433
WP_000655707.1		aminotransferase class I/II-fold pyridoxal phosphate-dependent enzyme	4	4	1	6	2753				1103	1103	1103	e26b52046ef139bf63509f5b590c18e0_597	935e3caf510be0c503c97acef35381b2_3475	36ade0437952544bcc39850c777ef069_641	S_aureus_9_01550
thrB		homoserine kinase	4	4	1	6	229				914	914	914	e26b52046ef139bf63509f5b590c18e0_2426	935e3caf510be0c503c97acef35381b2_1575	36ade0437952544bcc39850c777ef069_2728	S_aureus_9_01889
scpA		cysteine protease staphopain A	4	4	1	6	1487				1166	1166	1166	e26b52046ef139bf63509f5b590c18e0_3780	935e3caf510be0c503c97acef35381b2_131	36ade0437952544bcc39850c777ef069_4034	S_aureus_9_01960
WP_000994681.1		YibE/F family protein	4	4	1	6	2184				782	782	782	e26b52046ef139bf63509f5b590c18e0_775	935e3caf510be0c503c97acef35381b2_3285	36ade0437952544bcc39850c777ef069_835	S_aureus_9_02131
WP_000058383.1		NAD-dependent malic enzyme	4	4	1	6	1775				1229	1229	1229	e26b52046ef139bf63509f5b590c18e0_3199	935e3caf510be0c503c97acef35381b2_688	36ade0437952544bcc39850c777ef069_3479	S_aureus_9_00291
nirB		nitrite reductase large subunit NirB	4	4	1	6	46				2405	2405	2405	e26b52046ef139bf63509f5b590c18e0_4759	935e3caf510be0c503c97acef35381b2_4869	36ade0437952544bcc39850c777ef069_4952	S_aureus_9_00367
WP_001074542.1		glucosaminidase domain-containing protein	4	4	1	6	703				3770	3770	3770	e26b52046ef139bf63509f5b590c18e0_1866	935e3caf510be0c503c97acef35381b2_2151	36ade0437952544bcc39850c777ef069_2114	S_aureus_9_01097
nhaC		Na+/H+ antiporter NhaC	4	4	1	6	368				1397	1400	1399	e26b52046ef139bf63509f5b590c18e0_4558	935e3caf510be0c503c97acef35381b2_5072	36ade0437952544bcc39850c777ef069_4755	S_aureus_9_01882
WP_153227774.1		carbamoyl phosphate synthase small subunit	4	4	1	6	471				1100	1100	1100	e26b52046ef139bf63509f5b590c18e0_2174	935e3caf510be0c503c97acef35381b2_1843	36ade0437952544bcc39850c777ef069_2426	S_aureus_9_00696
WP_000590809.1		amino acid ABC transporter ATP-binding protein	4	4	1	6	2862				722	728	723	e26b52046ef139bf63509f5b590c18e0_3539	935e3caf510be0c503c97acef35381b2_334	36ade0437952544bcc39850c777ef069_3829	S_aureus_9_02257
WP_001133022.1		5'-3' exonuclease	4	4	1	6	117				878	878	878	e26b52046ef139bf63509f5b590c18e0_2652	935e3caf510be0c503c97acef35381b2_1342	36ade0437952544bcc39850c777ef069_2954	S_aureus_9_00048
WP_001028431.1		NAD(P)H-dependent oxidoreductase	4	4	1	6	2734				566	566	566	e26b52046ef139bf63509f5b590c18e0_559	935e3caf510be0c503c97acef35381b2_3513	36ade0437952544bcc39850c777ef069_603	S_aureus_9_01570
aaa		autolysin/adhesin Aaa	4	4	1	6	2188				1004	1004	1004	e26b52046ef139bf63509f5b590c18e0_767	935e3caf510be0c503c97acef35381b2_3293	36ade0437952544bcc39850c777ef069_827	S_aureus_9_02135
pmtB		phenol-soluble modulin export ABC transporter permease subunit PmtB	4	4	1	6	1462				635	680	668	e26b52046ef139bf63509f5b590c18e0_3832	935e3caf510be0c503c97acef35381b2_79	36ade0437952544bcc39850c777ef069_4086	S_aureus_9_02528
narJ		nitrate reductase molybdenum cofactor assembly chaperone	4	4	1	6	40				575	575	575	e26b52046ef139bf63509f5b590c18e0_4749	935e3caf510be0c503c97acef35381b2_4879	36ade0437952544bcc39850c777ef069_4942	S_aureus_9_00362
recR		recombination mediator RecR	4	4	1	6	2172				596	596	596	e26b52046ef139bf63509f5b590c18e0_805	935e3caf510be0c503c97acef35381b2_3255	36ade0437952544bcc39850c777ef069_865	S_aureus_9_02119
isaA		lytic transglycosylase IsaA	4	4	1	6	3145				701	701	701	e26b52046ef139bf63509f5b590c18e0_5123	935e3caf510be0c503c97acef35381b2_4519	36ade0437952544bcc39850c777ef069_5304	S_aureus_9_00532
WP_000928413.1		TerC family protein	4	4	1	6	2938				803	803	803	e26b52046ef139bf63509f5b590c18e0_1788	935e3caf510be0c503c97acef35381b2_2229	36ade0437952544bcc39850c777ef069_2040	S_aureus_9_02107
WP_000435107.1		aldo/keto reductase family oxidoreductase	4	4	1	6	1948				908	908	908	e26b52046ef139bf63509f5b590c18e0_1297	935e3caf510be0c503c97acef35381b2_2753	36ade0437952544bcc39850c777ef069_1365	S_aureus_9_01228
pmtD		phenol-soluble modulin export ABC transporter permease subunit PmtD	4	4	1	6	1464				740	740	740	e26b52046ef139bf63509f5b590c18e0_3828	935e3caf510be0c503c97acef35381b2_83	36ade0437952544bcc39850c777ef069_4082	S_aureus_9_02552
bioB		biotin synthase BioB	4	4	1	6	2974				1007	1007	1007	e26b52046ef139bf63509f5b590c18e0_4817	935e3caf510be0c503c97acef35381b2_4811	36ade0437952544bcc39850c777ef069_5012	S_aureus_9_00393
WP_001012748.1		BglG family transcription antiterminator	4	4	1	6	2650				2096	2096	2096	e26b52046ef139bf63509f5b590c18e0_371	935e3caf510be0c503c97acef35381b2_3711	36ade0437952544bcc39850c777ef069_411	S_aureus_9_01156
WP_000455256.1		uracil-DNA glycosylase	4	4	1	6	2069				656	656	656	e26b52046ef139bf63509f5b590c18e0_1059	935e3caf510be0c503c97acef35381b2_2989	36ade0437952544bcc39850c777ef069_1131	S_aureus_9_02184
gltS		sodium/glutamate symporter	4	4	1	6	413				1208	1208	1208	e26b52046ef139bf63509f5b590c18e0_4651	935e3caf510be0c503c97acef35381b2_4981	36ade0437952544bcc39850c777ef069_4846	S_aureus_9_01756
WP_000069098.1		NAD(P)H-dependent oxidoreductase	4	4	1	6	3197				671	671	671	e26b52046ef139bf63509f5b590c18e0_5025	935e3caf510be0c503c97acef35381b2_4617	36ade0437952544bcc39850c777ef069_5206	S_aureus_9_00484
bshA		N-acetyl-alpha-D-glucosaminyl L-malate synthase BshA	4	4	1	6	1362				1142	1142	1142	e26b52046ef139bf63509f5b590c18e0_2691	935e3caf510be0c503c97acef35381b2_1303	36ade0437952544bcc39850c777ef069_2993	S_aureus_9_00066
fni		type 2 isopentenyl-diphosphate Delta-isomerase	4	4	1	6	414				1049	1049	1049	e26b52046ef139bf63509f5b590c18e0_4653	935e3caf510be0c503c97acef35381b2_4979	36ade0437952544bcc39850c777ef069_4848	S_aureus_9_01757
WP_000922332.1		GntR family transcriptional regulator	4	4	1	6	2670				704	704	704	e26b52046ef139bf63509f5b590c18e0_411	935e3caf510be0c503c97acef35381b2_3671	36ade0437952544bcc39850c777ef069_451	S_aureus_9_01176
WP_001068523.1		aminotransferase class I/II-fold pyridoxal phosphate-dependent enzyme	4	4	1	6	1458				1286	1286	1286	e26b52046ef139bf63509f5b590c18e0_3842	935e3caf510be0c503c97acef35381b2_69	36ade0437952544bcc39850c777ef069_4096	S_aureus_9_02532
WP_000865624.1		DUF402 domain-containing protein	4	4	1	6	1965				644	644	644	e26b52046ef139bf63509f5b590c18e0_1263	935e3caf510be0c503c97acef35381b2_2787	36ade0437952544bcc39850c777ef069_1331	S_aureus_9_01211
era		GTPase Era	4	4	1	6	1648				899	899	899	e26b52046ef139bf63509f5b590c18e0_2939	935e3caf510be0c503c97acef35381b2_951	36ade0437952544bcc39850c777ef069_3219	S_aureus_9_00172
nsaS		nisin susceptibility-associated two-component system sensor histidine kinase NsaS	4	4	1	6	3086				887	887	887	e26b52046ef139bf63509f5b590c18e0_5245	935e3caf510be0c503c97acef35381b2_4395	36ade0437952544bcc39850c777ef069_5428	S_aureus_9_00585
WP_000923760.1		ABC transporter ATP-binding protein	4	4	1	6	3087				755	755	755	e26b52046ef139bf63509f5b590c18e0_5243	935e3caf510be0c503c97acef35381b2_4397	36ade0437952544bcc39850c777ef069_5426	S_aureus_9_00584
WP_000826670.1		ABC transporter substrate-binding protein	4	4	1	6	2578				974	974	974	e26b52046ef139bf63509f5b590c18e0_229	935e3caf510be0c503c97acef35381b2_3863	36ade0437952544bcc39850c777ef069_261	S_aureus_9_00913
group_2590	phnE	phosphonate ABC transporter, permease protein PhnE	4	4	1	6	2547				815	815	815	e26b52046ef139bf63509f5b590c18e0_175	935e3caf510be0c503c97acef35381b2_3931	36ade0437952544bcc39850c777ef069_197	S_aureus_9_00947
WP_000258714.1		aspartate kinase	4	4	1	6	165				1205	1205	1205	e26b52046ef139bf63509f5b590c18e0_2556	935e3caf510be0c503c97acef35381b2_1442	36ade0437952544bcc39850c777ef069_2858	S_aureus_9_00003
saeS		two-component system sensor histidine kinase SaeS	4	4	1	6	1931				1055	1055	1055	e26b52046ef139bf63509f5b590c18e0_1331	935e3caf510be0c503c97acef35381b2_2719	36ade0437952544bcc39850c777ef069_1399	S_aureus_9_01245
uvrC		excinuclease ABC subunit UvrC	4	4	1	6	610				1781	1781	1781	e26b52046ef139bf63509f5b590c18e0_2057	935e3caf510be0c503c97acef35381b2_1960	36ade0437952544bcc39850c777ef069_2309	S_aureus_9_01007
WP_000549222.1		polysaccharide deacetylase family protein	4	4	1	6	2354				1124	1124	1124	e26b52046ef139bf63509f5b590c18e0_5361	935e3caf510be0c503c97acef35381b2_4279	36ade0437952544bcc39850c777ef069_5542	S_aureus_9_01337
WP_000721707.1		HAD family hydrolase	4	4	1	6	1800				1130	1130	1130	e26b52046ef139bf63509f5b590c18e0_3249	935e3caf510be0c503c97acef35381b2_638	36ade0437952544bcc39850c777ef069_3529	S_aureus_9_00313
WP_001109285.1		rhodanese-related sulfurtransferase	4	4	1	6	2363				956	956	956	e26b52046ef139bf63509f5b590c18e0_5377	935e3caf510be0c503c97acef35381b2_4263	36ade0437952544bcc39850c777ef069_5560	S_aureus_9_01345
mgtE		magnesium transporter	4	4	1	6	2950				1385	1385	1385	e26b52046ef139bf63509f5b590c18e0_1764	935e3caf510be0c503c97acef35381b2_2254	36ade0437952544bcc39850c777ef069_2016	S_aureus_9_02095
lgt		prolipoprotein diacylglyceryl transferase	4	4	1	6	1132				839	839	839	e26b52046ef139bf63509f5b590c18e0_1454	935e3caf510be0c503c97acef35381b2_2596	36ade0437952544bcc39850c777ef069_1522	S_aureus_9_01300
WP_001080466.1		DUF4064 domain-containing protein	4	4	1	6	652				419	419	419	e26b52046ef139bf63509f5b590c18e0_1971	935e3caf510be0c503c97acef35381b2_2046	36ade0437952544bcc39850c777ef069_2223	S_aureus_9_01047
WP_001010508.1		SUF system NifU family Fe-S cluster assembly protein	4	4	1	6	1210				464	464	464	e26b52046ef139bf63509f5b590c18e0_1578	935e3caf510be0c503c97acef35381b2_2438	36ade0437952544bcc39850c777ef069_1694	S_aureus_9_00833
WP_000245683.1		low temperature requirement protein A	4	4	1	6	2747				1133	1133	1133	e26b52046ef139bf63509f5b590c18e0_585	935e3caf510be0c503c97acef35381b2_3487	36ade0437952544bcc39850c777ef069_629	S_aureus_9_01556
WP_000820892.1		TIGR00730 family Rossman fold protein	4	4	1	6	1956				566	566	566	e26b52046ef139bf63509f5b590c18e0_1281	935e3caf510be0c503c97acef35381b2_2769	36ade0437952544bcc39850c777ef069_1349	S_aureus_9_01220
cshB		DEAD/DEAH box helicase	4	4	1	6	1639				1346	1346	1346	e26b52046ef139bf63509f5b590c18e0_2921	935e3caf510be0c503c97acef35381b2_969	36ade0437952544bcc39850c777ef069_3201	S_aureus_9_00163
dhaK		dihydroxyacetone kinase subunit DhaK	4	4	1	6	1987				968	968	968	e26b52046ef139bf63509f5b590c18e0_1219	935e3caf510be0c503c97acef35381b2_2831	36ade0437952544bcc39850c777ef069_1287	S_aureus_9_02024
WP_000911017.1		ABC transporter ATP-binding protein	4	4	1	6	2702				677	677	677	e26b52046ef139bf63509f5b590c18e0_495	935e3caf510be0c503c97acef35381b2_3577	36ade0437952544bcc39850c777ef069_539	S_aureus_9_01600
WP_000467991.1		ABC transporter permease	4	4	1	6	2190				659	659	659	e26b52046ef139bf63509f5b590c18e0_763	935e3caf510be0c503c97acef35381b2_3297	36ade0437952544bcc39850c777ef069_823	S_aureus_9_02137
argH		argininosuccinate lyase	4	4	1	6	1007				1379	1379	1379	e26b52046ef139bf63509f5b590c18e0_1670	935e3caf510be0c503c97acef35381b2_2348	36ade0437952544bcc39850c777ef069_1916	S_aureus_9_00760
WP_000162810.1		DsbA family protein	4	4	1	6	57				599	599	599	e26b52046ef139bf63509f5b590c18e0_4781	935e3caf510be0c503c97acef35381b2_4847	36ade0437952544bcc39850c777ef069_4974	S_aureus_9_00376
WP_001039519.1		deoxynucleoside kinase	4	4	1	6	2092				617	617	617	e26b52046ef139bf63509f5b590c18e0_1013	935e3caf510be0c503c97acef35381b2_3035	36ade0437952544bcc39850c777ef069_1085	S_aureus_9_02502
WP_001246559.1		ABC transporter permease	4	4	1	6	656				797	797	797	e26b52046ef139bf63509f5b590c18e0_1963	935e3caf510be0c503c97acef35381b2_2054	36ade0437952544bcc39850c777ef069_2215	S_aureus_9_01051
sigB		RNA polymerase sigma factor SigB	4	4	1	6	2926				770	770	770	e26b52046ef139bf63509f5b590c18e0_4065	935e3caf510be0c503c97acef35381b2_5560	36ade0437952544bcc39850c777ef069_4257	S_aureus_9_02523
arlS		sensor histidine kinase ArlS	4	4	1	6	144				1355	1355	1355	e26b52046ef139bf63509f5b590c18e0_2600	935e3caf510be0c503c97acef35381b2_1398	36ade0437952544bcc39850c777ef069_2900	S_aureus_9_00024
WP_000503601.1		glutamate synthase subunit beta	4	4	1	6	2180				1463	1463	1463	e26b52046ef139bf63509f5b590c18e0_783	935e3caf510be0c503c97acef35381b2_3277	36ade0437952544bcc39850c777ef069_843	S_aureus_9_02127
ftsW		cell division protein FtsW	4	4	1	6	643				1226	1226	1226	e26b52046ef139bf63509f5b590c18e0_1989	935e3caf510be0c503c97acef35381b2_2028	36ade0437952544bcc39850c777ef069_2241	S_aureus_9_01039
WP_001180228.1		NADP-dependent oxidoreductase	4	4	1	6	839				1001	1004	1001	e26b52046ef139bf63509f5b590c18e0_4344	935e3caf510be0c503c97acef35381b2_5288	36ade0437952544bcc39850c777ef069_4535	S_aureus_9_02312
WP_000331330.1		type I restriction endonuclease subunit R	4	4	1	6	2601				2789	2789	2789	e26b52046ef139bf63509f5b590c18e0_275	935e3caf510be0c503c97acef35381b2_3817	36ade0437952544bcc39850c777ef069_307	S_aureus_9_00890
WP_000883645.1		acetyl-CoA carboxylase carboxyltransferase subunit alpha	4	4	1	6	1773				944	944	944	e26b52046ef139bf63509f5b590c18e0_3195	935e3caf510be0c503c97acef35381b2_692	36ade0437952544bcc39850c777ef069_3475	S_aureus_9_00289
hrcA		heat-inducible transcriptional repressor HrcA	4	4	1	6	1663				977	977	977	e26b52046ef139bf63509f5b590c18e0_2969	935e3caf510be0c503c97acef35381b2_921	36ade0437952544bcc39850c777ef069_3249	S_aureus_9_00187
WP_001276571.1		rhodanese-like domain-containing protein	4	4	1	6	1614				386	386	386	e26b52046ef139bf63509f5b590c18e0_2870	935e3caf510be0c503c97acef35381b2_1020	36ade0437952544bcc39850c777ef069_3150	S_aureus_9_00140
WP_000888498.1		protein-serine/threonine phosphatase Stp1	4	4	1	6	488				743	743	743	e26b52046ef139bf63509f5b590c18e0_2208	935e3caf510be0c503c97acef35381b2_1809	36ade0437952544bcc39850c777ef069_2460	S_aureus_9_00679
WP_001106110.1		glycosyltransferase	4	4	1	6	2084				1490	1490	1490	e26b52046ef139bf63509f5b590c18e0_1029	935e3caf510be0c503c97acef35381b2_3019	36ade0437952544bcc39850c777ef069_1101	S_aureus_9_02169
murC		UDP-N-acetylmuramate--L-alanine ligase	4	4	1	6	1818				1313	1313	1313	e26b52046ef139bf63509f5b590c18e0_3287	935e3caf510be0c503c97acef35381b2_600	36ade0437952544bcc39850c777ef069_3567	S_aureus_9_00328
WP_000950281.1		sensor histidine kinase	4	4	1	6	2666				1754	1754	1754	e26b52046ef139bf63509f5b590c18e0_403	935e3caf510be0c503c97acef35381b2_3679	36ade0437952544bcc39850c777ef069_443	S_aureus_9_01172
mnhD1		Na+/H+ antiporter Mnh1 subunit D	4	4	1	6	1018				1496	1496	1496	e26b52046ef139bf63509f5b590c18e0_1648	935e3caf510be0c503c97acef35381b2_2370	36ade0437952544bcc39850c777ef069_1894	S_aureus_9_00771
WP_001283968.1		winged helix-turn-helix transcriptional regulator	4	4	1	6	2705				1118	1118	1118	e26b52046ef139bf63509f5b590c18e0_501	935e3caf510be0c503c97acef35381b2_3571	36ade0437952544bcc39850c777ef069_545	S_aureus_9_01598
WP_000992523.1		DUF445 domain-containing protein	4	4	1	6	2851				1124	1124	1124	e26b52046ef139bf63509f5b590c18e0_3517	935e3caf510be0c503c97acef35381b2_356	36ade0437952544bcc39850c777ef069_3807	S_aureus_9_02246
WP_000064778.1		amino acid permease	4	4	1	6	120				1322	1322	1322	e26b52046ef139bf63509f5b590c18e0_2646	935e3caf510be0c503c97acef35381b2_1348	36ade0437952544bcc39850c777ef069_2948	S_aureus_9_00045
hutI		imidazolonepropionase	4	4	1	6	399				1238	1238	1238	e26b52046ef139bf63509f5b590c18e0_4621	935e3caf510be0c503c97acef35381b2_5009	36ade0437952544bcc39850c777ef069_4818	S_aureus_9_01743
WP_000142189.1		acyl-CoA dehydrogenase family protein	4	4	1	6	2639				1211	1211	1211	e26b52046ef139bf63509f5b590c18e0_345	935e3caf510be0c503c97acef35381b2_3737	36ade0437952544bcc39850c777ef069_385	S_aureus_9_01145
thrS		threonine--tRNA ligase	4	4	1	6	1757				1937	1937	1937	e26b52046ef139bf63509f5b590c18e0_3159	935e3caf510be0c503c97acef35381b2_726	36ade0437952544bcc39850c777ef069_3439	S_aureus_9_00273
WP_000593436.1		ABC transporter ATP-binding protein	4	4	1	6	240				899	908	905	e26b52046ef139bf63509f5b590c18e0_2404	935e3caf510be0c503c97acef35381b2_1597	36ade0437952544bcc39850c777ef069_2706	S_aureus_9_02544
hisH		imidazole glycerol phosphate synthase subunit HisH	4	4	1	6	2348				578	578	578	e26b52046ef139bf63509f5b590c18e0_5349	935e3caf510be0c503c97acef35381b2_4291	36ade0437952544bcc39850c777ef069_5530	S_aureus_9_01331
WP_000161674.1		Xaa-Pro peptidase family protein	4	4	1	6	1781				1055	1055	1055	e26b52046ef139bf63509f5b590c18e0_3211	935e3caf510be0c503c97acef35381b2_676	36ade0437952544bcc39850c777ef069_3491	S_aureus_9_00297
WP_000942300.1		ATP-binding cassette domain-containing protein	4	4	1	6	166				1601	1601	1601	e26b52046ef139bf63509f5b590c18e0_2554	935e3caf510be0c503c97acef35381b2_1445	36ade0437952544bcc39850c777ef069_2856	S_aureus_9_00002
WP_000872158.1		DUF177 domain-containing protein	4	4	1	6	630				557	557	557	e26b52046ef139bf63509f5b590c18e0_2015	935e3caf510be0c503c97acef35381b2_2002	36ade0437952544bcc39850c777ef069_2267	S_aureus_9_01026
WP_000481425.1		gluconate:H+ symporter	4	4	1	6	3219				1358	1358	1358	e26b52046ef139bf63509f5b590c18e0_4987	935e3caf510be0c503c97acef35381b2_4655	36ade0437952544bcc39850c777ef069_5162	S_aureus_9_00463
hemH		ferrochelatase	4	4	1	6	2835				923	923	923	e26b52046ef139bf63509f5b590c18e0_3487	935e3caf510be0c503c97acef35381b2_386	36ade0437952544bcc39850c777ef069_3777	S_aureus_9_02233
putP		sodium/proline symporter PutP	4	4	1	6	1494				1538	1538	1538	e26b52046ef139bf63509f5b590c18e0_3766	935e3caf510be0c503c97acef35381b2_145	36ade0437952544bcc39850c777ef069_4020	S_aureus_9_01967
WP_000390829.1		PP2C family protein-serine/threonine phosphatase	4	4	1	6	2923				1001	1001	1001	e26b52046ef139bf63509f5b590c18e0_4071	935e3caf510be0c503c97acef35381b2_5554	36ade0437952544bcc39850c777ef069_4263	S_aureus_9_02520
rnhC		ribonuclease HIII	4	4	1	6	616				938	938	938	e26b52046ef139bf63509f5b590c18e0_2043	935e3caf510be0c503c97acef35381b2_1974	36ade0437952544bcc39850c777ef069_2295	S_aureus_9_01013
WP_001117767.1		PhoH family protein	4	4	1	6	1652				947	947	947	e26b52046ef139bf63509f5b590c18e0_2947	935e3caf510be0c503c97acef35381b2_943	36ade0437952544bcc39850c777ef069_3227	S_aureus_9_00176
WP_000433354.1		M42 family metallopeptidase	4	4	1	6	191				1031	1031	1031	e26b52046ef139bf63509f5b590c18e0_2502	935e3caf510be0c503c97acef35381b2_1499	36ade0437952544bcc39850c777ef069_2804	S_aureus_9_01923
WP_000625885.1		iron ABC transporter permease	4	4	1	6	1988				1016	1016	1016	e26b52046ef139bf63509f5b590c18e0_1217	935e3caf510be0c503c97acef35381b2_2833	36ade0437952544bcc39850c777ef069_1285	S_aureus_9_02025
WP_000186313.1		Cof-type HAD-IIB family hydrolase	4	4	1	6	228				803	803	803	e26b52046ef139bf63509f5b590c18e0_2428	935e3caf510be0c503c97acef35381b2_1573	36ade0437952544bcc39850c777ef069_2730	S_aureus_9_01890
glmS		glutamine--fructose-6-phosphate transaminase (isomerizing)	4	4	1	6	93				1805	1805	1805	e26b52046ef139bf63509f5b590c18e0_4242	935e3caf510be0c503c97acef35381b2_5381	36ade0437952544bcc39850c777ef069_4440	S_aureus_9_01494
WP_000171645.1		acyl-CoA/acyl-ACP dehydrogenase	4	4	1	6	2580				1031	1034	1031	e26b52046ef139bf63509f5b590c18e0_233	935e3caf510be0c503c97acef35381b2_3859	36ade0437952544bcc39850c777ef069_265	S_aureus_9_00910
argC		N-acetyl-gamma-glutamyl-phosphate reductase	4	4	1	6	2589				1031	1034	1031	e26b52046ef139bf63509f5b590c18e0_251	935e3caf510be0c503c97acef35381b2_3841	36ade0437952544bcc39850c777ef069_283	S_aureus_9_00901
hisG		ATP phosphoribosyltransferase	4	4	1	6	2352				614	614	614	e26b52046ef139bf63509f5b590c18e0_5357	935e3caf510be0c503c97acef35381b2_4283	36ade0437952544bcc39850c777ef069_5538	S_aureus_9_01335
WP_000435374.1		RNA methyltransferase	4	4	1	6	620				740	740	740	e26b52046ef139bf63509f5b590c18e0_2037	935e3caf510be0c503c97acef35381b2_1980	36ade0437952544bcc39850c777ef069_2289	S_aureus_9_01016
rlmN		23S rRNA (adenine(2503)-C(2))-methyltransferase RlmN	4	4	1	6	487				1094	1094	1094	e26b52046ef139bf63509f5b590c18e0_2206	935e3caf510be0c503c97acef35381b2_1811	36ade0437952544bcc39850c777ef069_2458	S_aureus_9_00680
WP_042727666.1		sucrose-6-phosphate hydrolase	4	4	1	6	572				1484	1484	1484	e26b52046ef139bf63509f5b590c18e0_4000	935e3caf510be0c503c97acef35381b2_5625	36ade0437952544bcc39850c777ef069_4186	S_aureus_9_01694
WP_000660045.1		argininosuccinate synthase	4	4	1	6	1006				1205	1205	1205	e26b52046ef139bf63509f5b590c18e0_1672	935e3caf510be0c503c97acef35381b2_2346	36ade0437952544bcc39850c777ef069_1918	S_aureus_9_00759
WP_000183668.1		GNAT family N-acetyltransferase	4	4	1	6	2185				485	485	485	e26b52046ef139bf63509f5b590c18e0_773	935e3caf510be0c503c97acef35381b2_3287	36ade0437952544bcc39850c777ef069_833	S_aureus_9_02132
WP_000689582.1		MBL fold metallo-hydrolase	4	4	1	6	1825				842	842	842	e26b52046ef139bf63509f5b590c18e0_3301	935e3caf510be0c503c97acef35381b2_586	36ade0437952544bcc39850c777ef069_3581	S_aureus_9_00335
mutY		A/G-specific adenine glycosylase	4	4	1	6	1530				1037	1037	1037	e26b52046ef139bf63509f5b590c18e0_3658	935e3caf510be0c503c97acef35381b2_219	36ade0437952544bcc39850c777ef069_3946	S_aureus_9_02001
ssb		single-stranded DNA-binding protein	4	4	1	6	2760				503	503	503	e26b52046ef139bf63509f5b590c18e0_612	935e3caf510be0c503c97acef35381b2_3460	36ade0437952544bcc39850c777ef069_656	S_aureus_9_01543
WP_000081602.1		Bax inhibitor-1 family protein	4	4	1	6	1971				644	644	644	e26b52046ef139bf63509f5b590c18e0_1251	935e3caf510be0c503c97acef35381b2_2799	36ade0437952544bcc39850c777ef069_1319	S_aureus_9_02518
WP_000432076.1		YfcC family protein	4	4	1	6	340				1556	1556	1556	e26b52046ef139bf63509f5b590c18e0_2105	935e3caf510be0c503c97acef35381b2_1912	36ade0437952544bcc39850c777ef069_2357	S_aureus_9_00731
WP_000794423.1		GTP-binding protein	4	4	1	6	1949				926	926	926	e26b52046ef139bf63509f5b590c18e0_1295	935e3caf510be0c503c97acef35381b2_2755	36ade0437952544bcc39850c777ef069_1363	S_aureus_9_01227
lukG		bi-component leukocidin LukGH subunit G	4	4	1	6	518				1016	1016	1016	e26b52046ef139bf63509f5b590c18e0_3966	935e3caf510be0c503c97acef35381b2_5673	36ade0437952544bcc39850c777ef069_4104	S_aureus_9_01678
scdA		iron-sulfur cluster repair di-iron protein ScdA	4	4	1	6	2665				674	674	674	e26b52046ef139bf63509f5b590c18e0_401	935e3caf510be0c503c97acef35381b2_3681	36ade0437952544bcc39850c777ef069_441	S_aureus_9_01171
folE2		GTP cyclohydrolase FolE2	4	4	1	6	2083				878	878	878	e26b52046ef139bf63509f5b590c18e0_1031	935e3caf510be0c503c97acef35381b2_3017	36ade0437952544bcc39850c777ef069_1103	S_aureus_9_02170
WP_000323164.1		SLC13 family permease	4	4	1	6	1479				1562	1562	1562	e26b52046ef139bf63509f5b590c18e0_3798	935e3caf510be0c503c97acef35381b2_113	36ade0437952544bcc39850c777ef069_4052	S_aureus_9_01952
tkt		transketolase	4	4	1	6	215				1988	1988	1988	e26b52046ef139bf63509f5b590c18e0_2454	935e3caf510be0c503c97acef35381b2_1547	36ade0437952544bcc39850c777ef069_2756	S_aureus_9_01901
WP_001108545.1		M50 family metallopeptidase	4	4	1	6	2002				752	752	752	e26b52046ef139bf63509f5b590c18e0_1189	935e3caf510be0c503c97acef35381b2_2861	36ade0437952544bcc39850c777ef069_1257	S_aureus_9_02038
WP_000690421.1		sugar phosphate isomerase/epimerase	4	4	1	6	2625				968	968	968	e26b52046ef139bf63509f5b590c18e0_311	935e3caf510be0c503c97acef35381b2_3767	36ade0437952544bcc39850c777ef069_357	S_aureus_9_01132
uvrA		excinuclease ABC subunit UvrA	4	4	1	6	1130				2846	2846	2846	e26b52046ef139bf63509f5b590c18e0_1450	935e3caf510be0c503c97acef35381b2_2600	36ade0437952544bcc39850c777ef069_1518	S_aureus_9_01298
WP_000379098.1		metal-dependent hydrolase	4	4	1	6	1529				977	977	977	e26b52046ef139bf63509f5b590c18e0_3660	935e3caf510be0c503c97acef35381b2_217	36ade0437952544bcc39850c777ef069_3948	S_aureus_9_02000
pyrE		orotate phosphoribosyltransferase	4	4	1	6	474				611	611	611	e26b52046ef139bf63509f5b590c18e0_2180	935e3caf510be0c503c97acef35381b2_1837	36ade0437952544bcc39850c777ef069_2432	S_aureus_9_00693
WP_000456489.1		GyrI-like domain-containing protein	4	4	1	6	2984				473	473	473	e26b52046ef139bf63509f5b590c18e0_4839	935e3caf510be0c503c97acef35381b2_4789	36ade0437952544bcc39850c777ef069_5034	S_aureus_9_00402
dapE		ArgE/DapE family deacylase	4	4	1	6	521				1223	1223	1223	e26b52046ef139bf63509f5b590c18e0_3970	935e3caf510be0c503c97acef35381b2_5669	36ade0437952544bcc39850c777ef069_4108	S_aureus_9_01680
WP_000655972.1		NAD(P)/FAD-dependent oxidoreductase	4	4	1	6	19				1034	1034	1034	e26b52046ef139bf63509f5b590c18e0_4709	935e3caf510be0c503c97acef35381b2_4923	36ade0437952544bcc39850c777ef069_4902	S_aureus_9_01783
WP_000894032.1		YbbR-like domain-containing protein	4	4	1	6	100				932	932	932	e26b52046ef139bf63509f5b590c18e0_4256	935e3caf510be0c503c97acef35381b2_5367	36ade0437952544bcc39850c777ef069_4454	S_aureus_9_01501
WP_001013481.1		cation diffusion facilitator family transporter	4	4	1	6	2575				959	959	959	e26b52046ef139bf63509f5b590c18e0_221	935e3caf510be0c503c97acef35381b2_3871	36ade0437952544bcc39850c777ef069_253	S_aureus_9_00917
gtfA		accessory Sec system glycosyltransferase GtfA	4	4	1	6	3060				1508	1508	1508	e26b52046ef139bf63509f5b590c18e0_5297	935e3caf510be0c503c97acef35381b2_4343	36ade0437952544bcc39850c777ef069_5480	S_aureus_9_00610
WP_072353847.1		insulinase family protein	4	4	1	6	291				1265	1265	1265	e26b52046ef139bf63509f5b590c18e0_2330	935e3caf510be0c503c97acef35381b2_1687	36ade0437952544bcc39850c777ef069_2580	S_aureus_9_00622
WP_000921973.1		energy-coupling factor ABC transporter ATP-binding protein	4	4	1	6	727				1400	1400	1400	e26b52046ef139bf63509f5b590c18e0_1914	935e3caf510be0c503c97acef35381b2_2103	36ade0437952544bcc39850c777ef069_2162	S_aureus_9_01074
WP_000234068.1		CvpA family protein	4	4	1	6	614				521	521	521	e26b52046ef139bf63509f5b590c18e0_2047	935e3caf510be0c503c97acef35381b2_1970	36ade0437952544bcc39850c777ef069_2299	S_aureus_9_01011
ptsP		phosphoenolpyruvate--protein phosphotransferase	4	4	1	6	734				1718	1718	1718	e26b52046ef139bf63509f5b590c18e0_1929	935e3caf510be0c503c97acef35381b2_2088	36ade0437952544bcc39850c777ef069_2177	S_aureus_9_01067
mvaD		diphosphomevalonate decarboxylase	4	4	1	6	2059				983	983	983	e26b52046ef139bf63509f5b590c18e0_1079	935e3caf510be0c503c97acef35381b2_2969	36ade0437952544bcc39850c777ef069_1151	S_aureus_9_02194
WP_001294626.1		PH domain-containing protein	4	4	1	6	2917				1583	1583	1583	e26b52046ef139bf63509f5b590c18e0_4083	935e3caf510be0c503c97acef35381b2_5542	36ade0437952544bcc39850c777ef069_4275	S_aureus_9_01419
WP_001045078.1		TrkH family potassium uptake protein	4	4	1	6	548				1307	1349	1322	e26b52046ef139bf63509f5b590c18e0_3972	935e3caf510be0c503c97acef35381b2_5663	36ade0437952544bcc39850c777ef069_4114	S_aureus_9_01681
WP_000162661.1		sugar ABC transporter permease	4	4	1	6	2622				839	839	839	e26b52046ef139bf63509f5b590c18e0_305	935e3caf510be0c503c97acef35381b2_3773	36ade0437952544bcc39850c777ef069_351	S_aureus_9_01129
acnA		aconitate hydratase AcnA	4	4	1	6	207				2705	2705	2705	e26b52046ef139bf63509f5b590c18e0_2470	935e3caf510be0c503c97acef35381b2_1531	36ade0437952544bcc39850c777ef069_2772	S_aureus_9_01908
sdhB		succinate dehydrogenase iron-sulfur subunit	4	4	1	6	607				815	815	815	e26b52046ef139bf63509f5b590c18e0_2063	935e3caf510be0c503c97acef35381b2_1954	36ade0437952544bcc39850c777ef069_2315	S_aureus_9_01004
WP_001123303.1		thiol-disulfide oxidoreductase DCC family protein	4	4	1	6	79				413	413	413	e26b52046ef139bf63509f5b590c18e0_4218	935e3caf510be0c503c97acef35381b2_5407	36ade0437952544bcc39850c777ef069_4410	S_aureus_9_01484
alsS		acetolactate synthase AlsS	4	4	1	6	818				1664	1664	1664	e26b52046ef139bf63509f5b590c18e0_4380	935e3caf510be0c503c97acef35381b2_5246	36ade0437952544bcc39850c777ef069_4577	S_aureus_9_01799
WP_000863439.1		2-oxo acid dehydrogenase subunit E2	4	4	1	6	661				1292	1292	1292	e26b52046ef139bf63509f5b590c18e0_1953	935e3caf510be0c503c97acef35381b2_2064	36ade0437952544bcc39850c777ef069_2205	S_aureus_9_01056
ftsY		signal recognition particle-docking protein FtsY	4	4	1	6	504				1250	1250	1250	e26b52046ef139bf63509f5b590c18e0_2240	935e3caf510be0c503c97acef35381b2_1777	36ade0437952544bcc39850c777ef069_2492	S_aureus_9_00663
mepA		multidrug efflux MATE transporter MepA	4	4	1	6	2729				1355	1355	1355	e26b52046ef139bf63509f5b590c18e0_549	935e3caf510be0c503c97acef35381b2_3523	36ade0437952544bcc39850c777ef069_593	S_aureus_9_01575
WP_000063582.1		PTS transporter subunit IIC	4	4	1	6	2864				1061	1061	1061	e26b52046ef139bf63509f5b590c18e0_3543	935e3caf510be0c503c97acef35381b2_330	36ade0437952544bcc39850c777ef069_3835	S_aureus_9_02259
nagA		N-acetylglucosamine-6-phosphate deacetylase	4	4	1	6	1935				1181	1181	1181	e26b52046ef139bf63509f5b590c18e0_1323	935e3caf510be0c503c97acef35381b2_2727	36ade0437952544bcc39850c777ef069_1391	S_aureus_9_01241
WP_000120305.1		SdrH family protein	4	4	1	6	560				1232	1259	1252	e26b52046ef139bf63509f5b590c18e0_3980	935e3caf510be0c503c97acef35381b2_5645	36ade0437952544bcc39850c777ef069_4166	S_aureus_9_01685
WP_000022323.1		biotin-dependent carboxyltransferase family protein	4	4	1	6	1084				1004	1004	1004	e26b52046ef139bf63509f5b590c18e0_1357	935e3caf510be0c503c97acef35381b2_2693	36ade0437952544bcc39850c777ef069_1425	S_aureus_9_01257
lrgB		antiholin-like protein LrgB	4	4	1	6	2669				701	701	701	e26b52046ef139bf63509f5b590c18e0_409	935e3caf510be0c503c97acef35381b2_3673	36ade0437952544bcc39850c777ef069_449	S_aureus_9_01175
fabD		ACP S-malonyltransferase	4	4	1	6	499				926	926	926	e26b52046ef139bf63509f5b590c18e0_2230	935e3caf510be0c503c97acef35381b2_1787	36ade0437952544bcc39850c777ef069_2482	S_aureus_9_00668
pbp4		penicillin-binding protein PBP4	4	4	1	6	1995				1295	1295	1295	e26b52046ef139bf63509f5b590c18e0_1203	935e3caf510be0c503c97acef35381b2_2847	36ade0437952544bcc39850c777ef069_1271	S_aureus_9_02031
WP_001547756.1		YojF family protein	4	4	1	6	2081				362	362	362	e26b52046ef139bf63509f5b590c18e0_1035	935e3caf510be0c503c97acef35381b2_3013	36ade0437952544bcc39850c777ef069_1107	S_aureus_9_02172
cap8L		type 8 capsular polysaccharide synthesis protein Cap8L	4	4	1	6	2567				1205	1205	1205	e26b52046ef139bf63509f5b590c18e0_205	935e3caf510be0c503c97acef35381b2_3887	36ade0437952544bcc39850c777ef069_237	S_aureus_9_00925
WP_001001237.1		DNA-3-methyladenine glycosylase I	4	4	1	6	1738				560	560	560	e26b52046ef139bf63509f5b590c18e0_3120	935e3caf510be0c503c97acef35381b2_766	36ade0437952544bcc39850c777ef069_3400	S_aureus_9_00256
WP_001641560.1		DNA internalization-related competence protein ComEC/Rec2	4	4	1	6	1668				2201	2201	2201	e26b52046ef139bf63509f5b590c18e0_2979	935e3caf510be0c503c97acef35381b2_909	36ade0437952544bcc39850c777ef069_3259	S_aureus_9_00192
WP_000437968.1		GAF domain-containing sensor histidine kinase	4	4	1	6	2854				1112	1112	1112	e26b52046ef139bf63509f5b590c18e0_3523	935e3caf510be0c503c97acef35381b2_350	36ade0437952544bcc39850c777ef069_3813	S_aureus_9_02249
czrB		CDF family zinc efflux transporter CzrB	4	4	1	6	85				980	980	980	e26b52046ef139bf63509f5b590c18e0_4230	935e3caf510be0c503c97acef35381b2_5395	36ade0437952544bcc39850c777ef069_4422	S_aureus_9_01490
essC		type VII secretion protein EssC	4	4	1	6	2274				3232	4448	4139	e26b52046ef139bf63509f5b590c18e0_465	935e3caf510be0c503c97acef35381b2_3623	36ade0437952544bcc39850c777ef069_503	S_aureus_9_01200
WP_001253302.1		carbohydrate kinase	4	4	1	6	571				959	959	959	e26b52046ef139bf63509f5b590c18e0_3998	935e3caf510be0c503c97acef35381b2_5627	36ade0437952544bcc39850c777ef069_4184	S_aureus_9_01693
fabF		beta-ketoacyl-ACP synthase II	4	4	1	6	984				1244	1244	1244	e26b52046ef139bf63509f5b590c18e0_1716	935e3caf510be0c503c97acef35381b2_2302	36ade0437952544bcc39850c777ef069_1964	S_aureus_9_02071
WP_001266541.1		fructose-specific PTS transporter subunit EIIC	4	4	1	6	1936				1958	1958	1958	e26b52046ef139bf63509f5b590c18e0_1321	935e3caf510be0c503c97acef35381b2_2729	36ade0437952544bcc39850c777ef069_1389	S_aureus_9_01240
WP_000435044.1		DedA family protein	4	4	1	6	3210				611	611	611	e26b52046ef139bf63509f5b590c18e0_5003	935e3caf510be0c503c97acef35381b2_4637	36ade0437952544bcc39850c777ef069_5180	S_aureus_9_00472
rnc		ribonuclease III	4	4	1	6	502				731	731	731	e26b52046ef139bf63509f5b590c18e0_2236	935e3caf510be0c503c97acef35381b2_1781	36ade0437952544bcc39850c777ef069_2488	S_aureus_9_00665
WP_000202434.1		acyltransferase family protein	4	4	1	6	701				1010	1010	1010	e26b52046ef139bf63509f5b590c18e0_1860	935e3caf510be0c503c97acef35381b2_2157	36ade0437952544bcc39850c777ef069_2108	S_aureus_9_01099
glnA		type I glutamate--ammonia ligase	4	4	1	6	262				1340	1340	1340	e26b52046ef139bf63509f5b590c18e0_2390	935e3caf510be0c503c97acef35381b2_1627	36ade0437952544bcc39850c777ef069_2640	S_aureus_9_02358
WP_000932694.1		single-stranded DNA-binding protein	4	4	1	6	2894				395	395	395	e26b52046ef139bf63509f5b590c18e0_4130	935e3caf510be0c503c97acef35381b2_5495	36ade0437952544bcc39850c777ef069_4322	S_aureus_9_01441
WP_000999713.1		aromatic acid exporter family protein	4	4	1	6	1509				986	986	986	e26b52046ef139bf63509f5b590c18e0_3734	935e3caf510be0c503c97acef35381b2_177	36ade0437952544bcc39850c777ef069_3988	S_aureus_9_01980
WP_000102740.1		replication-associated recombination protein A	4	4	1	6	1706				1274	1274	1274	e26b52046ef139bf63509f5b590c18e0_3053	935e3caf510be0c503c97acef35381b2_833	36ade0437952544bcc39850c777ef069_3333	S_aureus_9_00229
kdpB		potassium-transporting ATPase subunit KdpB	4	4	1	6	2914				2027	2027	2027	e26b52046ef139bf63509f5b590c18e0_4089	935e3caf510be0c503c97acef35381b2_5536	36ade0437952544bcc39850c777ef069_4281	S_aureus_9_01422
nrgA		ammonium transporter	4	4	1	6	574				950	1250	1175	e26b52046ef139bf63509f5b590c18e0_4004	935e3caf510be0c503c97acef35381b2_5621	36ade0437952544bcc39850c777ef069_4190	S_aureus_9_01696
ahpF		alkyl hydroperoxide reductase subunit F	4	4	1	6	2775				1523	1523	1523	e26b52046ef139bf63509f5b590c18e0_640	935e3caf510be0c503c97acef35381b2_3432	36ade0437952544bcc39850c777ef069_684	S_aureus_9_01528
WP_000776018.1		DNA-binding protein	4	4	1	6	1942				422	422	422	e26b52046ef139bf63509f5b590c18e0_1309	935e3caf510be0c503c97acef35381b2_2741	36ade0437952544bcc39850c777ef069_1377	S_aureus_9_01234
WP_000004339.1		polysaccharide biosynthesis protein	4	4	1	6	1832				1661	1661	1661	e26b52046ef139bf63509f5b590c18e0_3315	935e3caf510be0c503c97acef35381b2_572	36ade0437952544bcc39850c777ef069_3595	S_aureus_9_00342
recN		DNA repair protein RecN	4	4	1	6	1600				1679	1679	1679	e26b52046ef139bf63509f5b590c18e0_2842	935e3caf510be0c503c97acef35381b2_1048	36ade0437952544bcc39850c777ef069_3122	S_aureus_9_00126
WP_054193107.1		MFS transporter	4	4	1	6	3005				1187	1187	1187	e26b52046ef139bf63509f5b590c18e0_4877	935e3caf510be0c503c97acef35381b2_4751	36ade0437952544bcc39850c777ef069_5072	S_aureus_9_00419
guaC		GMP reductase	4	4	1	6	221				977	977	977	e26b52046ef139bf63509f5b590c18e0_2442	935e3caf510be0c503c97acef35381b2_1559	36ade0437952544bcc39850c777ef069_2744	S_aureus_9_01896
rlmH		23S rRNA (pseudouridine(1915)-N(3))-methyltransferase RlmH	4	4	1	6	2461				477	479	478	e26b52046ef139bf63509f5b590c18e0_57	935e3caf510be0c503c97acef35381b2_4163	36ade0437952544bcc39850c777ef069_57	S_aureus_9_01397
WP_001837162.1		YggS family pyridoxal phosphate-dependent enzyme	4	4	1	6	458				668	668	668	e26b52046ef139bf63509f5b590c18e0_2146	935e3caf510be0c503c97acef35381b2_1871	36ade0437952544bcc39850c777ef069_2398	S_aureus_9_00709
WP_000895193.1		ferrous iron transporter B	4	4	1	6	3132				1340	1340	1340	e26b52046ef139bf63509f5b590c18e0_5151	935e3caf510be0c503c97acef35381b2_4491	36ade0437952544bcc39850c777ef069_5332	S_aureus_9_00545
ribF		riboflavin biosynthesis protein RibF	4	4	1	6	297				971	971	971	e26b52046ef139bf63509f5b590c18e0_2318	935e3caf510be0c503c97acef35381b2_1699	36ade0437952544bcc39850c777ef069_2568	S_aureus_9_00628
tsaE		tRNA (adenosine(37)-N6)-threonylcarbamoyltransferase complex ATPase subunit type 1 TsaE	4	4	1	6	584				461	494	469	e26b52046ef139bf63509f5b590c18e0_4024	935e3caf510be0c503c97acef35381b2_5601	36ade0437952544bcc39850c777ef069_4212	S_aureus_9_01705
WP_000366158.1		NERD domain-containing protein	4	4	1	6	1864				908	908	908	e26b52046ef139bf63509f5b590c18e0_3382	935e3caf510be0c503c97acef35381b2_511	36ade0437952544bcc39850c777ef069_3654	S_aureus_9_02443
nth		endonuclease III	4	4	1	6	1356				659	659	659	e26b52046ef139bf63509f5b590c18e0_2679	935e3caf510be0c503c97acef35381b2_1315	36ade0437952544bcc39850c777ef069_2981	S_aureus_9_00060
sirA		staphyloferrin B ABC transporter substrate-binding protein SirA	4	4	1	6	2523				992	992	992	e26b52046ef139bf63509f5b590c18e0_121	935e3caf510be0c503c97acef35381b2_3985	36ade0437952544bcc39850c777ef069_143	S_aureus_9_00972
WP_001009688.1		M17 family metallopeptidase	4	4	1	6	1025				1475	1475	1475	e26b52046ef139bf63509f5b590c18e0_1634	935e3caf510be0c503c97acef35381b2_2384	36ade0437952544bcc39850c777ef069_1880	S_aureus_9_00778
pstB		phosphate ABC transporter ATP-binding protein PstB	4	4	1	6	172				851	851	851	e26b52046ef139bf63509f5b590c18e0_2542	935e3caf510be0c503c97acef35381b2_1457	36ade0437952544bcc39850c777ef069_2844	S_aureus_9_01942
nrdD		anaerobic ribonucleoside-triphosphate reductase	4	4	1	6	3097				1850	1850	1850	e26b52046ef139bf63509f5b590c18e0_5223	935e3caf510be0c503c97acef35381b2_4415	36ade0437952544bcc39850c777ef069_5406	S_aureus_9_00578
yhaM		3'-5' exoribonuclease YhaM	4	4	1	6	2845				941	941	941	e26b52046ef139bf63509f5b590c18e0_3507	935e3caf510be0c503c97acef35381b2_366	36ade0437952544bcc39850c777ef069_3797	S_aureus_9_02242
trxB		thioredoxin-disulfide reductase	4	4	1	6	1135				935	935	935	e26b52046ef139bf63509f5b590c18e0_1460	935e3caf510be0c503c97acef35381b2_2590	36ade0437952544bcc39850c777ef069_1528	S_aureus_9_01303
WP_000120368.1		inorganic phosphate transporter	4	4	1	6	1973				1007	1007	1007	e26b52046ef139bf63509f5b590c18e0_1247	935e3caf510be0c503c97acef35381b2_2803	36ade0437952544bcc39850c777ef069_1315	S_aureus_9_02010
nagE		N-acetylglucosamine-specific PTS transporter subunit IIBC	4	4	1	6	1801				1466	1466	1466	e26b52046ef139bf63509f5b590c18e0_3251	935e3caf510be0c503c97acef35381b2_636	36ade0437952544bcc39850c777ef069_3531	S_aureus_9_00314
leuD		3-isopropylmalate dehydratase small subunit	4	4	1	6	592				572	572	572	e26b52046ef139bf63509f5b590c18e0_4042	935e3caf510be0c503c97acef35381b2_5583	36ade0437952544bcc39850c777ef069_4230	S_aureus_9_01713
WP_000077317.1		bifunctional homocysteine S-methyltransferase/methylenetetrahydrofolate reductase	4	4	1	6	2751				1841	1841	1841	e26b52046ef139bf63509f5b590c18e0_593	935e3caf510be0c503c97acef35381b2_3479	36ade0437952544bcc39850c777ef069_637	S_aureus_9_01552
accD		acetyl-CoA carboxylase, carboxyltransferase subunit beta	4	4	1	6	1774				857	857	857	e26b52046ef139bf63509f5b590c18e0_3197	935e3caf510be0c503c97acef35381b2_690	36ade0437952544bcc39850c777ef069_3477	S_aureus_9_00290
rbsD		D-ribose pyranase	4	4	1	6	2676				404	404	404	e26b52046ef139bf63509f5b590c18e0_423	935e3caf510be0c503c97acef35381b2_3659	36ade0437952544bcc39850c777ef069_463	S_aureus_9_01181
rplQ		50S ribosomal protein L17	4	4	1	6	809				368	368	368	e26b52046ef139bf63509f5b590c18e0_4400	935e3caf510be0c503c97acef35381b2_5230	36ade0437952544bcc39850c777ef069_4595	S_aureus_9_01807
WP_000786736.1		ATP-binding cassette domain-containing protein	4	4	1	6	979				941	941	941	e26b52046ef139bf63509f5b590c18e0_1726	935e3caf510be0c503c97acef35381b2_2292	36ade0437952544bcc39850c777ef069_1974	S_aureus_9_02076
WP_000717800.1		N-acetylmuramoyl-L-alanine amidase	4	4	1	6	1712				875	875	875	e26b52046ef139bf63509f5b590c18e0_3066	935e3caf510be0c503c97acef35381b2_820	36ade0437952544bcc39850c777ef069_3346	S_aureus_9_00233
WP_001146762.1		carboxymuconolactone decarboxylase family protein	4	4	1	6	3031				422	422	422	e26b52046ef139bf63509f5b590c18e0_4919	935e3caf510be0c503c97acef35381b2_4709	36ade0437952544bcc39850c777ef069_5114	S_aureus_9_00440
narH		nitrate reductase subunit beta	4	4	1	6	41				1559	1559	1559	e26b52046ef139bf63509f5b590c18e0_4751	935e3caf510be0c503c97acef35381b2_4877	36ade0437952544bcc39850c777ef069_4944	S_aureus_9_00363
adcA		zinc ABC transporter substrate-binding lipoprotein AdcA	4	4	1	6	52				1547	1553	1550	e26b52046ef139bf63509f5b590c18e0_4771	935e3caf510be0c503c97acef35381b2_4857	36ade0437952544bcc39850c777ef069_4964	S_aureus_9_00373
pspB		phosphoglycerate mutase family protein	4	4	1	6	1192				581	581	581	e26b52046ef139bf63509f5b590c18e0_1539	935e3caf510be0c503c97acef35381b2_2481	36ade0437952544bcc39850c777ef069_1653	S_aureus_9_00854
WP_001205912.1		PH domain-containing protein	4	4	1	6	2918				491	494	491	e26b52046ef139bf63509f5b590c18e0_4081	935e3caf510be0c503c97acef35381b2_5544	36ade0437952544bcc39850c777ef069_4273	S_aureus_9_01418
ilvA		threonine ammonia-lyase IlvA	4	4	1	6	593				1268	1268	1268	e26b52046ef139bf63509f5b590c18e0_4044	935e3caf510be0c503c97acef35381b2_5581	36ade0437952544bcc39850c777ef069_4232	S_aureus_9_01714
WP_000757568.1		glycerophosphodiester phosphodiesterase	4	4	1	6	636				926	926	926	e26b52046ef139bf63509f5b590c18e0_2003	935e3caf510be0c503c97acef35381b2_2014	36ade0437952544bcc39850c777ef069_2255	S_aureus_9_01032
WP_000429008.1		diacylglycerol kinase family lipid kinase	4	4	1	6	1092				917	917	917	e26b52046ef139bf63509f5b590c18e0_1373	935e3caf510be0c503c97acef35381b2_2677	36ade0437952544bcc39850c777ef069_1441	S_aureus_9_01265
bioD		dethiobiotin synthase	4	4	1	6	2976				686	686	686	e26b52046ef139bf63509f5b590c18e0_4821	935e3caf510be0c503c97acef35381b2_4807	36ade0437952544bcc39850c777ef069_5016	S_aureus_9_00395
icaB		intercellular adhesin biosynthesis polysaccharide N-deacetylase	4	4	1	6	2340				872	872	872	e26b52046ef139bf63509f5b590c18e0_5337	935e3caf510be0c503c97acef35381b2_4303	36ade0437952544bcc39850c777ef069_5520	S_aureus_9_01324
araB		ribulokinase	4	4	1	6	2097				1637	1637	1637	e26b52046ef139bf63509f5b590c18e0_1003	935e3caf510be0c503c97acef35381b2_3045	36ade0437952544bcc39850c777ef069_1075	S_aureus_9_02294
WP_000849439.1		hypothetical protein	4	4	1	6	1765				1487	1487	1487	e26b52046ef139bf63509f5b590c18e0_3177	935e3caf510be0c503c97acef35381b2_708	36ade0437952544bcc39850c777ef069_3457	S_aureus_9_00281
WP_000029536.1		GNAT family N-acetyltransferase	4	4	1	6	777				887	887	887	e26b52046ef139bf63509f5b590c18e0_4466	935e3caf510be0c503c97acef35381b2_5164	36ade0437952544bcc39850c777ef069_4661	S_aureus_9_01839
WP_001127960.1		class I mannose-6-phosphate isomerase	4	4	1	6	82				938	938	938	e26b52046ef139bf63509f5b590c18e0_4224	935e3caf510be0c503c97acef35381b2_5401	36ade0437952544bcc39850c777ef069_4416	S_aureus_9_01487
WP_000534428.1		amino acid permease	4	4	1	6	3114				1448	1448	1448	e26b52046ef139bf63509f5b590c18e0_5187	935e3caf510be0c503c97acef35381b2_4451	36ade0437952544bcc39850c777ef069_5370	S_aureus_9_00564
WP_001287078.1		hypothetical protein	4	4	1	6	2916				479	479	479	e26b52046ef139bf63509f5b590c18e0_4085	935e3caf510be0c503c97acef35381b2_5540	36ade0437952544bcc39850c777ef069_4277	S_aureus_9_01420
group_2750	accC	acetyl-CoA carboxylase biotin carboxylase subunit	4	4	1	6	1607				1355	1355	1355	e26b52046ef139bf63509f5b590c18e0_2856	935e3caf510be0c503c97acef35381b2_1034	36ade0437952544bcc39850c777ef069_3136	S_aureus_9_00133
WP_000604817.1		aminodeoxychorismate/anthranilate synthase component II	4	4	1	6	189				566	566	566	e26b52046ef139bf63509f5b590c18e0_2506	935e3caf510be0c503c97acef35381b2_1495	36ade0437952544bcc39850c777ef069_2808	S_aureus_9_01925
WP_000190138.1		2-oxoacid:ferredoxin oxidoreductase subunit beta	4	4	1	6	279				866	866	866	e26b52046ef139bf63509f5b590c18e0_2354	935e3caf510be0c503c97acef35381b2_1663	36ade0437952544bcc39850c777ef069_2604	S_aureus_9_02340
leuS		leucine--tRNA ligase	4	4	1	6	1836				2417	2423	2420	e26b52046ef139bf63509f5b590c18e0_3323	935e3caf510be0c503c97acef35381b2_564	36ade0437952544bcc39850c777ef069_3603	S_aureus_9_00346
hemA		glutamyl-tRNA reductase	4	4	1	6	1745				1346	1346	1346	e26b52046ef139bf63509f5b590c18e0_3136	935e3caf510be0c503c97acef35381b2_750	36ade0437952544bcc39850c777ef069_3416	S_aureus_9_00263
pbpB		penicillin-binding protein	4	4	1	6	451				2234	2234	2234	e26b52046ef139bf63509f5b590c18e0_2132	935e3caf510be0c503c97acef35381b2_1885	36ade0437952544bcc39850c777ef069_2384	S_aureus_9_00716
WP_000181832.1		MurR/RpiR family transcriptional regulator	4	4	1	6	2599				875	878	875	e26b52046ef139bf63509f5b590c18e0_271	935e3caf510be0c503c97acef35381b2_3821	36ade0437952544bcc39850c777ef069_303	S_aureus_9_00892
bshB2		bacillithiol biosynthesis deacetylase BshB2	4	4	1	6	2082				665	665	665	e26b52046ef139bf63509f5b590c18e0_1033	935e3caf510be0c503c97acef35381b2_3015	36ade0437952544bcc39850c777ef069_1105	S_aureus_9_02171
sarA		global transcriptional regulator SarA	4	4	1	6	2019				374	374	374	e26b52046ef139bf63509f5b590c18e0_1155	935e3caf510be0c503c97acef35381b2_2895	36ade0437952544bcc39850c777ef069_1223	S_aureus_9_02055
WP_000652052.1		aminotransferase class I/II-fold pyridoxal phosphate-dependent enzyme	4	4	1	6	264				1238	1238	1238	e26b52046ef139bf63509f5b590c18e0_2386	935e3caf510be0c503c97acef35381b2_1631	36ade0437952544bcc39850c777ef069_2636	S_aureus_9_02356
WP_000990133.1		GntR family transcriptional regulator	4	4	1	6	3217				680	680	680	e26b52046ef139bf63509f5b590c18e0_4991	935e3caf510be0c503c97acef35381b2_4651	36ade0437952544bcc39850c777ef069_5166	S_aureus_9_00465
WP_000887016.1		BglG family transcription antiterminator	4	4	1	6	3068				1874	1874	1874	e26b52046ef139bf63509f5b590c18e0_5281	935e3caf510be0c503c97acef35381b2_4359	36ade0437952544bcc39850c777ef069_5464	S_aureus_9_00602
WP_000520233.1		ABC transporter permease	4	4	1	6	1203				695	695	695	e26b52046ef139bf63509f5b590c18e0_1564	935e3caf510be0c503c97acef35381b2_2452	36ade0437952544bcc39850c777ef069_1680	S_aureus_9_00840
WP_064136350.1		polyprenyl synthetase family protein	4	4	1	6	1602				881	881	881	e26b52046ef139bf63509f5b590c18e0_2846	935e3caf510be0c503c97acef35381b2_1044	36ade0437952544bcc39850c777ef069_3126	S_aureus_9_00128
nusA		transcription termination factor NusA	4	4	1	6	303				1175	1175	1175	e26b52046ef139bf63509f5b590c18e0_2306	935e3caf510be0c503c97acef35381b2_1711	36ade0437952544bcc39850c777ef069_2556	S_aureus_9_00634
WP_000837105.1		ABC transporter substrate-binding protein	4	4	1	6	2630				968	968	968	e26b52046ef139bf63509f5b590c18e0_321	935e3caf510be0c503c97acef35381b2_3757	36ade0437952544bcc39850c777ef069_367	S_aureus_9_01137
WP_000524902.1		YqeG family HAD IIIA-type phosphatase	4	4	1	6	1678				527	527	527	e26b52046ef139bf63509f5b590c18e0_2999	935e3caf510be0c503c97acef35381b2_889	36ade0437952544bcc39850c777ef069_3279	S_aureus_9_00202
WP_000486810.1		bile acid:sodium symporter family protein	4	4	1	6	390				917	917	917	e26b52046ef139bf63509f5b590c18e0_4602	935e3caf510be0c503c97acef35381b2_5028	36ade0437952544bcc39850c777ef069_4799	S_aureus_9_01734
gyrB		DNA topoisomerase (ATP-hydrolyzing) subunit B	4	4	1	6	2392				1934	1934	1934	e26b52046ef139bf63509f5b590c18e0_11	935e3caf510be0c503c97acef35381b2_4209	36ade0437952544bcc39850c777ef069_11	S_aureus_9_01376
WP_000868645.1		aspartate kinase	4	4	1	6	232				1382	1382	1382	e26b52046ef139bf63509f5b590c18e0_2420	935e3caf510be0c503c97acef35381b2_1581	36ade0437952544bcc39850c777ef069_2722	S_aureus_9_01886
WP_001187630.1		HD domain-containing protein	4	4	1	6	2901				539	647	620	e26b52046ef139bf63509f5b590c18e0_4115	935e3caf510be0c503c97acef35381b2_5510	36ade0437952544bcc39850c777ef069_4307	S_aureus_9_01434
WP_000735859.1		homoserine dehydrogenase	4	4	1	6	231				1280	1280	1280	e26b52046ef139bf63509f5b590c18e0_2422	935e3caf510be0c503c97acef35381b2_1579	36ade0437952544bcc39850c777ef069_2724	S_aureus_9_01887
WP_000735038.1		ABC transporter substrate-binding protein	4	4	1	6	352				908	908	908	e26b52046ef139bf63509f5b590c18e0_4526	935e3caf510be0c503c97acef35381b2_5104	36ade0437952544bcc39850c777ef069_4723	S_aureus_9_01867
hflX		GTPase HflX	4	4	1	6	265				1238	1238	1238	e26b52046ef139bf63509f5b590c18e0_2384	935e3caf510be0c503c97acef35381b2_1633	36ade0437952544bcc39850c777ef069_2634	S_aureus_9_02355
WP_000180230.1		HD domain-containing protein	4	4	1	6	2033				1295	1295	1295	e26b52046ef139bf63509f5b590c18e0_1127	935e3caf510be0c503c97acef35381b2_2923	36ade0437952544bcc39850c777ef069_1195	S_aureus_9_02541
WP_001049957.1		peptide chain release factor 3	4	4	1	6	2939				1562	1562	1562	e26b52046ef139bf63509f5b590c18e0_1786	935e3caf510be0c503c97acef35381b2_2232	36ade0437952544bcc39850c777ef069_2038	S_aureus_9_02106
vraR		two-component system response regulator VraR	4	4	1	6	1514				629	629	629	e26b52046ef139bf63509f5b590c18e0_3724	935e3caf510be0c503c97acef35381b2_187	36ade0437952544bcc39850c777ef069_3978	S_aureus_9_01985
WP_000451834.1		Na+/H+ antiporter NhaC family protein	4	4	1	6	395				1313	1313	1313	e26b52046ef139bf63509f5b590c18e0_4612	935e3caf510be0c503c97acef35381b2_5018	36ade0437952544bcc39850c777ef069_4809	S_aureus_9_01739
corA		magnesium/cobalt transporter CorA	4	4	1	6	415				947	947	947	e26b52046ef139bf63509f5b590c18e0_4655	935e3caf510be0c503c97acef35381b2_4977	36ade0437952544bcc39850c777ef069_4850	S_aureus_9_01758
WP_000487150.1		class I SAM-dependent RNA methyltransferase	4	4	1	6	1347				1145	1145	1145	e26b52046ef139bf63509f5b590c18e0_2660	935e3caf510be0c503c97acef35381b2_1334	36ade0437952544bcc39850c777ef069_2962	S_aureus_9_00052
WP_000046602.1		UDP-N-acetylglucosamine 1-carboxyvinyltransferase	4	4	1	6	63				1259	1259	1259	e26b52046ef139bf63509f5b590c18e0_4186	935e3caf510be0c503c97acef35381b2_5439	36ade0437952544bcc39850c777ef069_4378	S_aureus_9_01468
tenA		thiaminase II	4	4	1	6	2896				689	689	689	e26b52046ef139bf63509f5b590c18e0_4125	935e3caf510be0c503c97acef35381b2_5500	36ade0437952544bcc39850c777ef069_4317	S_aureus_9_01439
WP_000799248.1		PLP-dependent aminotransferase family protein	4	4	1	6	2132				1382	1382	1382	e26b52046ef139bf63509f5b590c18e0_932	935e3caf510be0c503c97acef35381b2_3116	36ade0437952544bcc39850c777ef069_1004	S_aureus_9_02260
sglT		sodium:solute symporter	4	4	1	6	2708				1532	1532	1532	e26b52046ef139bf63509f5b590c18e0_507	935e3caf510be0c503c97acef35381b2_3565	36ade0437952544bcc39850c777ef069_551	S_aureus_9_01595
treP		PTS system trehalose-specific EIIBC component	4	4	1	6	2179				1427	1427	1427	e26b52046ef139bf63509f5b590c18e0_788	935e3caf510be0c503c97acef35381b2_3272	36ade0437952544bcc39850c777ef069_848	S_aureus_9_02125
WP_000599584.1		PH domain-containing protein	4	4	1	6	363				326	326	326	e26b52046ef139bf63509f5b590c18e0_4548	935e3caf510be0c503c97acef35381b2_5082	36ade0437952544bcc39850c777ef069_4745	S_aureus_9_01878
murQ		N-acetylmuramic acid 6-phosphate etherase	4	4	1	6	2597				896	896	896	e26b52046ef139bf63509f5b590c18e0_267	935e3caf510be0c503c97acef35381b2_3825	36ade0437952544bcc39850c777ef069_299	S_aureus_9_00894
group_2785	cls	cardiolipin synthase	4	4	1	6	2902				1484	1484	1484	e26b52046ef139bf63509f5b590c18e0_4113	935e3caf510be0c503c97acef35381b2_5512	36ade0437952544bcc39850c777ef069_4305	S_aureus_9_01433
cdaA		diadenylate cyclase CdaA	4	4	1	6	101				809	809	809	e26b52046ef139bf63509f5b590c18e0_4258	935e3caf510be0c503c97acef35381b2_5365	36ade0437952544bcc39850c777ef069_4456	S_aureus_9_01502
WP_000816184.1		TIGR01457 family HAD-type hydrolase	4	4	1	6	1039				779	779	779	e26b52046ef139bf63509f5b590c18e0_1606	935e3caf510be0c503c97acef35381b2_2412	36ade0437952544bcc39850c777ef069_1852	S_aureus_9_00791
yajO		aldo/keto reductase	4	4	1	6	939				908	908	908	e26b52046ef139bf63509f5b590c18e0_2802	935e3caf510be0c503c97acef35381b2_1088	36ade0437952544bcc39850c777ef069_3080	S_aureus_9_00107
WP_000251253.1		DUF402 domain-containing protein	4	4	1	6	1531				542	542	542	e26b52046ef139bf63509f5b590c18e0_3656	935e3caf510be0c503c97acef35381b2_221	36ade0437952544bcc39850c777ef069_3944	S_aureus_9_02002
WP_001801792.1		ATP synthase subunit I	4	4	1	6	2879				353	452	427	e26b52046ef139bf63509f5b590c18e0_4158	935e3caf510be0c503c97acef35381b2_5467	36ade0437952544bcc39850c777ef069_4350	S_aureus_9_01454
pepF		oligoendopeptidase F	4	4	1	6	174				1814	1814	1814	e26b52046ef139bf63509f5b590c18e0_2538	935e3caf510be0c503c97acef35381b2_1461	36ade0437952544bcc39850c777ef069_2840	S_aureus_9_01940
WP_000453314.1		aldo/keto reductase	4	4	1	6	1863				833	833	833	e26b52046ef139bf63509f5b590c18e0_3380	935e3caf510be0c503c97acef35381b2_513	36ade0437952544bcc39850c777ef069_3652	S_aureus_9_02442
rbfA		30S ribosome-binding factor RbfA	4	4	1	6	299				350	350	350	e26b52046ef139bf63509f5b590c18e0_2314	935e3caf510be0c503c97acef35381b2_1703	36ade0437952544bcc39850c777ef069_2564	S_aureus_9_00630
sufD		Fe-S cluster assembly protein SufD	4	4	1	6	1208				1307	1307	1307	e26b52046ef139bf63509f5b590c18e0_1574	935e3caf510be0c503c97acef35381b2_2442	36ade0437952544bcc39850c777ef069_1690	S_aureus_9_00835
bepA		tetratricopeptide repeat protein	4	4	1	6	1367				1244	1244	1244	e26b52046ef139bf63509f5b590c18e0_2701	935e3caf510be0c503c97acef35381b2_1293	36ade0437952544bcc39850c777ef069_3003	S_aureus_9_00071
fbp		fructose-1,6-bisphosphatase	4	4	1	6	3204				1964	1964	1964	e26b52046ef139bf63509f5b590c18e0_5011	935e3caf510be0c503c97acef35381b2_4631	36ade0437952544bcc39850c777ef069_5192	S_aureus_9_00477
ugpC		sn-glycerol-3-phosphate ABC transporter ATP-binding protein UgpC	4	4	1	6	2619				1097	1097	1097	e26b52046ef139bf63509f5b590c18e0_299	935e3caf510be0c503c97acef35381b2_3779	36ade0437952544bcc39850c777ef069_345	S_aureus_9_01126
budA		acetolactate decarboxylase	4	4	1	6	819				704	704	704	e26b52046ef139bf63509f5b590c18e0_4378	935e3caf510be0c503c97acef35381b2_5248	36ade0437952544bcc39850c777ef069_4575	S_aureus_9_01798
WP_000344337.1		DNA polymerase III subunit delta'	4	4	1	6	2167				926	926	926	e26b52046ef139bf63509f5b590c18e0_824	935e3caf510be0c503c97acef35381b2_3236	36ade0437952544bcc39850c777ef069_884	S_aureus_9_02418
WP_000153344.1		SRPBCC domain-containing protein	4	4	1	6	51				467	467	467	e26b52046ef139bf63509f5b590c18e0_4769	935e3caf510be0c503c97acef35381b2_4859	36ade0437952544bcc39850c777ef069_4962	S_aureus_9_00372
WP_249741535.1		NAD-dependent deacetylase	4	4	1	6	2722				944	944	944	e26b52046ef139bf63509f5b590c18e0_533	935e3caf510be0c503c97acef35381b2_3539	36ade0437952544bcc39850c777ef069_577	S_aureus_9_01583
WP_001793365.1		DeoR/GlpR family DNA-binding transcription regulator	4	4	1	6	830				755	791	782	e26b52046ef139bf63509f5b590c18e0_4362	935e3caf510be0c503c97acef35381b2_5270	36ade0437952544bcc39850c777ef069_4553	S_aureus_9_02303
WP_000886468.1		membrane protein	4	4	1	6	1528				836	836	836	e26b52046ef139bf63509f5b590c18e0_3662	935e3caf510be0c503c97acef35381b2_215	36ade0437952544bcc39850c777ef069_3950	S_aureus_9_01999
group_2801	ribE	riboflavin synthase	4	4	1	6	1848				632	632	632	e26b52046ef139bf63509f5b590c18e0_3345	935e3caf510be0c503c97acef35381b2_544	36ade0437952544bcc39850c777ef069_3621	S_aureus_9_02426
WP_000021870.1		TrkH family potassium uptake protein	4	4	1	6	670				1358	1358	1358	e26b52046ef139bf63509f5b590c18e0_1792	935e3caf510be0c503c97acef35381b2_2225	36ade0437952544bcc39850c777ef069_2044	S_aureus_9_02109
WP_000178307.1		phytoene/squalene synthase family protein	4	4	1	6	3152				863	863	863	e26b52046ef139bf63509f5b590c18e0_5111	935e3caf510be0c503c97acef35381b2_4533	36ade0437952544bcc39850c777ef069_5290	S_aureus_9_00525
saeR		response regulator transcription factor SaeR	4	4	1	6	1930				686	686	686	e26b52046ef139bf63509f5b590c18e0_1333	935e3caf510be0c503c97acef35381b2_2717	36ade0437952544bcc39850c777ef069_1401	S_aureus_9_01246
walK		cell wall metabolism sensor histidine kinase WalK	4	4	1	6	2406				1826	1826	1826	e26b52046ef139bf63509f5b590c18e0_47	935e3caf510be0c503c97acef35381b2_4173	36ade0437952544bcc39850c777ef069_47	S_aureus_9_01392
WP_000720804.1		ABC transporter substrate-binding protein	4	4	1	6	2614				1775	1775	1775	e26b52046ef139bf63509f5b590c18e0_289	935e3caf510be0c503c97acef35381b2_3789	36ade0437952544bcc39850c777ef069_335	S_aureus_9_01121
WP_000143496.1		FMN-binding glutamate synthase family protein	4	4	1	6	3013				1577	1577	1577	e26b52046ef139bf63509f5b590c18e0_4891	935e3caf510be0c503c97acef35381b2_4737	36ade0437952544bcc39850c777ef069_5086	S_aureus_9_00426
WP_000434765.1		phosphotransferase family protein	4	4	1	6	1827				791	791	791	e26b52046ef139bf63509f5b590c18e0_3305	935e3caf510be0c503c97acef35381b2_582	36ade0437952544bcc39850c777ef069_3585	S_aureus_9_00337
WP_072353906.1		NAD-dependent protein deacylase	4	4	1	6	829				740	740	740	e26b52046ef139bf63509f5b590c18e0_4364	935e3caf510be0c503c97acef35381b2_5268	36ade0437952544bcc39850c777ef069_4555	S_aureus_9_02302
WP_000215214.1		DUF488 domain-containing protein	4	4	1	6	2644				356	356	356	e26b52046ef139bf63509f5b590c18e0_355	935e3caf510be0c503c97acef35381b2_3727	36ade0437952544bcc39850c777ef069_395	S_aureus_9_01150
WP_000735558.1		hypothetical protein	4	4	1	6	2022				506	506	506	e26b52046ef139bf63509f5b590c18e0_1149	935e3caf510be0c503c97acef35381b2_2901	36ade0437952544bcc39850c777ef069_1217	S_aureus_9_02058
lacD		tagatose-bisphosphate aldolase	4	4	1	6	834				980	980	980	e26b52046ef139bf63509f5b590c18e0_4354	935e3caf510be0c503c97acef35381b2_5278	36ade0437952544bcc39850c777ef069_4545	S_aureus_9_02307
WP_153227792.1		SAV1866 family putative multidrug efflux ABC transporter	4	4	1	6	1532				1736	1736	1736	e26b52046ef139bf63509f5b590c18e0_3654	935e3caf510be0c503c97acef35381b2_223	36ade0437952544bcc39850c777ef069_3942	S_aureus_9_02003
nikA		ABC transporter substrate-binding protein	4	4	1	6	2643				1475	1475	1475	e26b52046ef139bf63509f5b590c18e0_353	935e3caf510be0c503c97acef35381b2_3729	36ade0437952544bcc39850c777ef069_393	S_aureus_9_01149
hisD		histidinol dehydrogenase	4	4	1	6	2351				1250	1250	1250	e26b52046ef139bf63509f5b590c18e0_5355	935e3caf510be0c503c97acef35381b2_4285	36ade0437952544bcc39850c777ef069_5536	S_aureus_9_01334
WP_000101538.1		amino acid permease	4	4	1	6	2987				1409	1409	1409	e26b52046ef139bf63509f5b590c18e0_4845	935e3caf510be0c503c97acef35381b2_4783	36ade0437952544bcc39850c777ef069_5040	S_aureus_9_00405
WP_000787672.1		phosphate/phosphite/phosphonate ABC transporter substrate-binding protein	4	4	1	6	2550				956	956	956	e26b52046ef139bf63509f5b590c18e0_181	935e3caf510be0c503c97acef35381b2_3925	36ade0437952544bcc39850c777ef069_203	S_aureus_9_00944
phoU		phosphate signaling complex protein PhoU	4	4	1	6	173				641	641	641	e26b52046ef139bf63509f5b590c18e0_2540	935e3caf510be0c503c97acef35381b2_1459	36ade0437952544bcc39850c777ef069_2842	S_aureus_9_01941
trpA		tryptophan synthase subunit alpha	4	4	1	6	184				728	728	728	e26b52046ef139bf63509f5b590c18e0_2516	935e3caf510be0c503c97acef35381b2_1485	36ade0437952544bcc39850c777ef069_2818	S_aureus_9_01930
adhR		MerR family transcriptional regulator	4	4	1	6	826				416	416	416	e26b52046ef139bf63509f5b590c18e0_4370	935e3caf510be0c503c97acef35381b2_5256	36ade0437952544bcc39850c777ef069_4567	S_aureus_9_02299
WP_000667382.1		MurR/RpiR family transcriptional regulator	4	4	1	6	2711				800	800	800	e26b52046ef139bf63509f5b590c18e0_513	935e3caf510be0c503c97acef35381b2_3559	36ade0437952544bcc39850c777ef069_557	S_aureus_9_01592
WP_000776740.1		ABC transporter permease	4	4	1	6	3088				2000	2000	2000	e26b52046ef139bf63509f5b590c18e0_5241	935e3caf510be0c503c97acef35381b2_4399	36ade0437952544bcc39850c777ef069_5424	S_aureus_9_00583
WP_001033865.1		CPBP family glutamic-type intramembrane protease	4	4	1	6	676				602	602	602	e26b52046ef139bf63509f5b590c18e0_1810	935e3caf510be0c503c97acef35381b2_2207	36ade0437952544bcc39850c777ef069_2062	S_aureus_9_02117
mnhE1		Na+/H+ antiporter Mnh1 subunit E	4	4	1	6	1019				479	479	479	e26b52046ef139bf63509f5b590c18e0_1646	935e3caf510be0c503c97acef35381b2_2372	36ade0437952544bcc39850c777ef069_1892	S_aureus_9_00772
WP_000091445.1		hypothetical protein	4	4	1	6	1860				302	302	302	e26b52046ef139bf63509f5b590c18e0_3372	935e3caf510be0c503c97acef35381b2_519	36ade0437952544bcc39850c777ef069_3646	S_aureus_9_02439
fumC		class II fumarate hydratase	4	4	1	6	2856				1385	1385	1385	e26b52046ef139bf63509f5b590c18e0_3527	935e3caf510be0c503c97acef35381b2_346	36ade0437952544bcc39850c777ef069_3817	S_aureus_9_02251
tmk		dTMP kinase	4	4	1	6	2169				617	617	617	e26b52046ef139bf63509f5b590c18e0_820	935e3caf510be0c503c97acef35381b2_3240	36ade0437952544bcc39850c777ef069_880	S_aureus_9_02420
rsmB		16S rRNA (cytosine(967)-C(5))-methyltransferase RsmB	4	4	1	6	486				1307	1307	1307	e26b52046ef139bf63509f5b590c18e0_2204	935e3caf510be0c503c97acef35381b2_1813	36ade0437952544bcc39850c777ef069_2456	S_aureus_9_00681
WP_001261671.1		FAD/NAD(P)-binding domain-containing protein	4	4	1	6	1850				1502	1502	1502	e26b52046ef139bf63509f5b590c18e0_3350	935e3caf510be0c503c97acef35381b2_539	36ade0437952544bcc39850c777ef069_3626	S_aureus_9_02428
murD		UDP-N-acetylmuramoyl-L-alanine--D-glutamate ligase	4	4	1	6	453				1349	1349	1349	e26b52046ef139bf63509f5b590c18e0_2136	935e3caf510be0c503c97acef35381b2_1881	36ade0437952544bcc39850c777ef069_2388	S_aureus_9_00714
WP_000769705.1		MAP domain-containing protein	4	4	1	6	820				425	425	425	e26b52046ef139bf63509f5b590c18e0_4376	935e3caf510be0c503c97acef35381b2_5250	36ade0437952544bcc39850c777ef069_4573	S_aureus_9_01797
WP_000901023.1		hypothetical protein	4	4	1	6	2857				395	395	395	e26b52046ef139bf63509f5b590c18e0_3529	935e3caf510be0c503c97acef35381b2_344	36ade0437952544bcc39850c777ef069_3819	S_aureus_9_02252
WP_000800700.1		NCS2 family permease	4	4	1	6	779				1334	1334	1334	e26b52046ef139bf63509f5b590c18e0_4460	935e3caf510be0c503c97acef35381b2_5170	36ade0437952544bcc39850c777ef069_4655	S_aureus_9_01837
WP_000974460.1		organic hydroperoxide resistance protein	4	4	1	6	1194				422	422	422	e26b52046ef139bf63509f5b590c18e0_1545	935e3caf510be0c503c97acef35381b2_2475	36ade0437952544bcc39850c777ef069_1659	S_aureus_9_00851
WP_064136332.1		class I SAM-dependent methyltransferase	4	4	1	6	1786				947	947	947	e26b52046ef139bf63509f5b590c18e0_3221	935e3caf510be0c503c97acef35381b2_666	36ade0437952544bcc39850c777ef069_3501	S_aureus_9_00301
guaA		glutamine-hydrolyzing GMP synthase	4	4	1	6	2785				1541	1541	1541	e26b52046ef139bf63509f5b590c18e0_663	935e3caf510be0c503c97acef35381b2_3409	36ade0437952544bcc39850c777ef069_707	S_aureus_9_01518
ddl		D-alanine--D-alanine ligase	4	4	1	6	2907				1070	1070	1070	e26b52046ef139bf63509f5b590c18e0_4103	935e3caf510be0c503c97acef35381b2_5522	36ade0437952544bcc39850c777ef069_4295	S_aureus_9_01428
polX		DNA polymerase/3'-5' exonuclease PolX	4	4	1	6	613				1712	1712	1712	e26b52046ef139bf63509f5b590c18e0_2049	935e3caf510be0c503c97acef35381b2_1968	36ade0437952544bcc39850c777ef069_2301	S_aureus_9_01010
WP_000713072.1		DUF4097 family beta strand repeat-containing protein	4	4	1	6	1468				842	842	842	e26b52046ef139bf63509f5b590c18e0_3820	935e3caf510be0c503c97acef35381b2_91	36ade0437952544bcc39850c777ef069_4074	S_aureus_9_02556
WP_000080028.1		response regulator transcription factor	4	4	1	6	1767				704	704	704	e26b52046ef139bf63509f5b590c18e0_3181	935e3caf510be0c503c97acef35381b2_704	36ade0437952544bcc39850c777ef069_3461	S_aureus_9_00283
WP_000570687.1		alanine:cation symporter family protein	4	4	1	6	2946				1568	1568	1568	e26b52046ef139bf63509f5b590c18e0_1772	935e3caf510be0c503c97acef35381b2_2246	36ade0437952544bcc39850c777ef069_2024	S_aureus_9_02099
codY		GTP-sensing pleiotropic transcriptional regulator CodY	4	4	1	6	316				773	773	773	e26b52046ef139bf63509f5b590c18e0_2280	935e3caf510be0c503c97acef35381b2_1737	36ade0437952544bcc39850c777ef069_2530	S_aureus_9_00645
group_2841	pepF	oligoendopeptidase F	4	4	1	6	2936				1808	1808	1808	e26b52046ef139bf63509f5b590c18e0_1748	935e3caf510be0c503c97acef35381b2_2270	36ade0437952544bcc39850c777ef069_1996	S_aureus_9_02087
pxpB		5-oxoprolinase subunit PxpB	4	4	1	6	1688				734	734	734	e26b52046ef139bf63509f5b590c18e0_3017	935e3caf510be0c503c97acef35381b2_869	36ade0437952544bcc39850c777ef069_3297	S_aureus_9_00211
WP_000161738.1		NAD(P)H-dependent glycerol-3-phosphate dehydrogenase	4	4	1	6	1378				998	998	998	e26b52046ef139bf63509f5b590c18e0_2721	935e3caf510be0c503c97acef35381b2_1273	36ade0437952544bcc39850c777ef069_3023	S_aureus_9_00081
tyrS		tyrosine--tRNA ligase	4	4	1	6	1804				1262	1262	1262	e26b52046ef139bf63509f5b590c18e0_3257	935e3caf510be0c503c97acef35381b2_630	36ade0437952544bcc39850c777ef069_3537	S_aureus_9_00317
nrdR		transcriptional regulator NrdR	4	4	1	6	1760				470	470	470	e26b52046ef139bf63509f5b590c18e0_3167	935e3caf510be0c503c97acef35381b2_718	36ade0437952544bcc39850c777ef069_3447	S_aureus_9_00276
WP_001794550.1		YibE/F family protein	4	4	1	6	2183				1112	1118	1116	e26b52046ef139bf63509f5b590c18e0_777	935e3caf510be0c503c97acef35381b2_3283	36ade0437952544bcc39850c777ef069_837	S_aureus_9_02130
sucB		dihydrolipoyllysine-residue succinyltransferase	4	4	1	6	146				1268	1268	1268	e26b52046ef139bf63509f5b590c18e0_2596	935e3caf510be0c503c97acef35381b2_1402	36ade0437952544bcc39850c777ef069_2896	S_aureus_9_00022
WP_000611471.1		UDP-N-acetylmuramoyl-tripeptide--D-alanyl-D-alanine ligase	4	4	1	6	2908				1358	1358	1358	e26b52046ef139bf63509f5b590c18e0_4101	935e3caf510be0c503c97acef35381b2_5524	36ade0437952544bcc39850c777ef069_4293	S_aureus_9_01427
srrB		two-component system sensor histidine kinase SrrB	4	4	1	6	949				1751	1751	1751	e26b52046ef139bf63509f5b590c18e0_2784	935e3caf510be0c503c97acef35381b2_1106	36ade0437952544bcc39850c777ef069_3062	S_aureus_9_00098
WP_001566779.1		hypothetical protein	4	4	1	6	768				251	251	251	e26b52046ef139bf63509f5b590c18e0_4482	935e3caf510be0c503c97acef35381b2_5148	36ade0437952544bcc39850c777ef069_4679	S_aureus_9_01846
parC		DNA topoisomerase IV subunit A	4	4	1	6	202				2402	2402	2402	e26b52046ef139bf63509f5b590c18e0_2480	935e3caf510be0c503c97acef35381b2_1521	36ade0437952544bcc39850c777ef069_2782	S_aureus_9_01913
rimI		ribosomal protein S18-alanine N-acetyltransferase	4	4	1	6	582				464	464	464	e26b52046ef139bf63509f5b590c18e0_4020	935e3caf510be0c503c97acef35381b2_5605	36ade0437952544bcc39850c777ef069_4208	S_aureus_9_01703
WP_000234727.1		thioesterase family protein	4	4	1	6	416				491	491	491	e26b52046ef139bf63509f5b590c18e0_4657	935e3caf510be0c503c97acef35381b2_4975	36ade0437952544bcc39850c777ef069_4852	S_aureus_9_01759
tet(38)		tetracycline efflux MFS transporter Tet(38)	4	4	1	6	2544				1352	1352	1352	e26b52046ef139bf63509f5b590c18e0_169	935e3caf510be0c503c97acef35381b2_3937	36ade0437952544bcc39850c777ef069_191	S_aureus_9_00950
WP_001036667.1		bifunctional cystathionine gamma-lyase/homocysteine desulfhydrase	4	4	1	6	2192				1142	1142	1142	e26b52046ef139bf63509f5b590c18e0_759	935e3caf510be0c503c97acef35381b2_3301	36ade0437952544bcc39850c777ef069_819	S_aureus_9_02139
clpX		ATP-dependent Clp protease ATP-binding subunit ClpX	4	4	1	6	1747				1262	1262	1262	e26b52046ef139bf63509f5b590c18e0_3140	935e3caf510be0c503c97acef35381b2_746	36ade0437952544bcc39850c777ef069_3420	S_aureus_9_00265
deoB		phosphopentomutase	4	4	1	6	2546				1178	1178	1178	e26b52046ef139bf63509f5b590c18e0_173	935e3caf510be0c503c97acef35381b2_3933	36ade0437952544bcc39850c777ef069_195	S_aureus_9_00948
WP_064136531.1		FUSC family protein	4	4	1	6	3213				1823	1823	1823	e26b52046ef139bf63509f5b590c18e0_4999	935e3caf510be0c503c97acef35381b2_4643	36ade0437952544bcc39850c777ef069_5174	S_aureus_9_00469
WP_000180991.1		ABC transporter permease/substrate-binding protein	4	4	1	6	1089				1514	1514	1514	e26b52046ef139bf63509f5b590c18e0_1367	935e3caf510be0c503c97acef35381b2_2683	36ade0437952544bcc39850c777ef069_1435	S_aureus_9_01262
sasF		cell-wall-anchored protein SasF	4	4	1	6	3062				1895	1907	1904	e26b52046ef139bf63509f5b590c18e0_5293	935e3caf510be0c503c97acef35381b2_4347	36ade0437952544bcc39850c777ef069_5476	S_aureus_9_00608
modA		molybdate ABC transporter substrate-binding protein	4	4	1	6	347				776	782	779	e26b52046ef139bf63509f5b590c18e0_4516	935e3caf510be0c503c97acef35381b2_5114	36ade0437952544bcc39850c777ef069_4713	S_aureus_9_01862
yhgF		RNA-binding transcriptional accessory protein	4	4	1	6	2927				2138	2150	2147	e26b52046ef139bf63509f5b590c18e0_4063	935e3caf510be0c503c97acef35381b2_5562	36ade0437952544bcc39850c777ef069_4255	S_aureus_9_02524
msaC		sarA expression modulator MsaC	4	4	1	6	157				401	401	401	e26b52046ef139bf63509f5b590c18e0_2572	935e3caf510be0c503c97acef35381b2_1426	36ade0437952544bcc39850c777ef069_2874	S_aureus_9_00011
WP_000565310.1		tyrosine-protein phosphatase	4	4	1	6	2334				767	767	767	e26b52046ef139bf63509f5b590c18e0_5325	935e3caf510be0c503c97acef35381b2_4315	36ade0437952544bcc39850c777ef069_5508	S_aureus_9_01318
deoD		purine-nucleoside phosphorylase	4	4	1	6	2543				707	707	707	e26b52046ef139bf63509f5b590c18e0_167	935e3caf510be0c503c97acef35381b2_3939	36ade0437952544bcc39850c777ef069_189	S_aureus_9_00951
WP_001224187.1		TetR/AcrR family transcriptional regulator	4	4	1	6	3137				557	557	557	e26b52046ef139bf63509f5b590c18e0_5141	935e3caf510be0c503c97acef35381b2_4501	36ade0437952544bcc39850c777ef069_5322	S_aureus_9_00540
mnhA1		Na+/H+ antiporter Mnh1 subunit A	4	4	1	6	1015				2405	2405	2405	e26b52046ef139bf63509f5b590c18e0_1654	935e3caf510be0c503c97acef35381b2_2364	36ade0437952544bcc39850c777ef069_1900	S_aureus_9_00768
WP_000241308.1		DUF1273 domain-containing protein	4	4	1	6	1350				563	563	563	e26b52046ef139bf63509f5b590c18e0_2667	935e3caf510be0c503c97acef35381b2_1327	36ade0437952544bcc39850c777ef069_2969	S_aureus_9_00055
WP_000573242.1		oxidoreductase	4	4	1	6	430				1004	1004	1004	e26b52046ef139bf63509f5b590c18e0_4705	935e3caf510be0c503c97acef35381b2_4929	36ade0437952544bcc39850c777ef069_4898	S_aureus_9_01781
WP_249741447.1		purine permease	4	4	1	6	2783				1268	1268	1268	e26b52046ef139bf63509f5b590c18e0_659	935e3caf510be0c503c97acef35381b2_3413	36ade0437952544bcc39850c777ef069_703	S_aureus_9_01520
WP_000382586.1		AraC family transcriptional regulator	4	4	1	6	1586				866	866	866	e26b52046ef139bf63509f5b590c18e0_2814	935e3caf510be0c503c97acef35381b2_1076	36ade0437952544bcc39850c777ef069_3092	S_aureus_9_00113
fdhF		formate dehydrogenase subunit alpha	4	4	1	6	377				2954	3038	2975	e26b52046ef139bf63509f5b590c18e0_4576	935e3caf510be0c503c97acef35381b2_5054	36ade0437952544bcc39850c777ef069_4773	S_aureus_9_01722
fusA		elongation factor G	4	4	1	6	2102				2081	2081	2081	e26b52046ef139bf63509f5b590c18e0_993	935e3caf510be0c503c97acef35381b2_3055	36ade0437952544bcc39850c777ef069_1065	S_aureus_9_02289
WP_001065584.1		ATP phosphoribosyltransferase regulatory subunit	4	4	1	6	2353				818	818	818	e26b52046ef139bf63509f5b590c18e0_5359	935e3caf510be0c503c97acef35381b2_4281	36ade0437952544bcc39850c777ef069_5540	S_aureus_9_01336
pckA		phosphoenolpyruvate carboxykinase (ATP)	4	4	1	6	1866				1592	1592	1592	e26b52046ef139bf63509f5b590c18e0_3387	935e3caf510be0c503c97acef35381b2_506	36ade0437952544bcc39850c777ef069_3659	S_aureus_9_02445
sapep		Mn(2+)-dependent dipeptidase Sapep	4	4	1	6	1829				1409	1409	1409	e26b52046ef139bf63509f5b590c18e0_3309	935e3caf510be0c503c97acef35381b2_578	36ade0437952544bcc39850c777ef069_3589	S_aureus_9_00339
WP_000344351.1		urease accessory protein UreD	4	4	1	6	361				836	836	836	e26b52046ef139bf63509f5b590c18e0_4544	935e3caf510be0c503c97acef35381b2_5086	36ade0437952544bcc39850c777ef069_4741	S_aureus_9_01876
WP_000159750.1		PTS transporter subunit EIIC	4	4	1	6	2598				1454	1454	1454	e26b52046ef139bf63509f5b590c18e0_269	935e3caf510be0c503c97acef35381b2_3823	36ade0437952544bcc39850c777ef069_301	S_aureus_9_00893
WP_001006453.1		cysteine desulfurase	4	4	1	6	1209				1241	1250	1247	e26b52046ef139bf63509f5b590c18e0_1576	935e3caf510be0c503c97acef35381b2_2440	36ade0437952544bcc39850c777ef069_1692	S_aureus_9_00834
lexA		transcriptional repressor LexA	4	4	1	6	218				623	623	623	e26b52046ef139bf63509f5b590c18e0_2448	935e3caf510be0c503c97acef35381b2_1553	36ade0437952544bcc39850c777ef069_2750	S_aureus_9_01898
WP_064136352.1		aromatic acid exporter family protein	4	4	1	6	1594				980	980	980	e26b52046ef139bf63509f5b590c18e0_2830	935e3caf510be0c503c97acef35381b2_1060	36ade0437952544bcc39850c777ef069_3110	S_aureus_9_00120
WP_000991504.1		alpha-glucoside-specific PTS transporter subunit IIBC	4	4	1	6	392				1604	1604	1604	e26b52046ef139bf63509f5b590c18e0_4606	935e3caf510be0c503c97acef35381b2_5024	36ade0437952544bcc39850c777ef069_4803	S_aureus_9_01736
WP_000917664.1		hypothetical protein	4	4	1	6	386				356	356	356	e26b52046ef139bf63509f5b590c18e0_4594	935e3caf510be0c503c97acef35381b2_5036	36ade0437952544bcc39850c777ef069_4791	S_aureus_9_01730
sfaB		staphyloferrin A synthetase SfaB	4	4	1	6	847				1757	1757	1757	e26b52046ef139bf63509f5b590c18e0_4326	935e3caf510be0c503c97acef35381b2_5304	36ade0437952544bcc39850c777ef069_4519	S_aureus_9_02320
WP_000836425.1		amidohydrolase family protein	4	4	1	6	3135				1010	1010	1010	e26b52046ef139bf63509f5b590c18e0_5145	935e3caf510be0c503c97acef35381b2_4497	36ade0437952544bcc39850c777ef069_5326	S_aureus_9_00542
WP_000049154.1		amino acid permease	4	4	1	6	1755				1493	1493	1493	e26b52046ef139bf63509f5b590c18e0_3157	935e3caf510be0c503c97acef35381b2_729	36ade0437952544bcc39850c777ef069_3437	S_aureus_9_00272
WP_015445861.1		ATP-binding protein	4	4	1	6	1766				1661	1664	1661	e26b52046ef139bf63509f5b590c18e0_3179	935e3caf510be0c503c97acef35381b2_706	36ade0437952544bcc39850c777ef069_3459	S_aureus_9_00282
WP_000192949.1		YigZ family protein	4	4	1	6	1115				641	641	641	e26b52046ef139bf63509f5b590c18e0_1421	935e3caf510be0c503c97acef35381b2_2627	36ade0437952544bcc39850c777ef069_1491	S_aureus_9_01287
recF		DNA replication/repair protein RecF	4	4	1	6	2391				1112	1112	1112	e26b52046ef139bf63509f5b590c18e0_9	935e3caf510be0c503c97acef35381b2_4211	36ade0437952544bcc39850c777ef069_9	S_aureus_9_01375
purK		5-(carboxyamino)imidazole ribonucleotide synthase	4	4	1	6	716				1124	1124	1124	e26b52046ef139bf63509f5b590c18e0_1892	935e3caf510be0c503c97acef35381b2_2125	36ade0437952544bcc39850c777ef069_2140	S_aureus_9_01085
WP_001058111.1		SprT family protein	4	4	1	6	2928				455	455	455	e26b52046ef139bf63509f5b590c18e0_4061	935e3caf510be0c503c97acef35381b2_5564	36ade0437952544bcc39850c777ef069_4253	S_aureus_9_02525
WP_000425353.1		valine--tRNA ligase	4	4	1	6	1737				2630	2630	2630	e26b52046ef139bf63509f5b590c18e0_3117	935e3caf510be0c503c97acef35381b2_769	36ade0437952544bcc39850c777ef069_3397	S_aureus_9_00255
group_2889	mqo	malate dehydrogenase (quinone)	4	4	1	6	435				1478	1478	1478	e26b52046ef139bf63509f5b590c18e0_4695	935e3caf510be0c503c97acef35381b2_4939	36ade0437952544bcc39850c777ef069_4888	S_aureus_9_01776
WP_153227807.1		DUF805 domain-containing protein	4	4	1	6	411				620	647	629	e26b52046ef139bf63509f5b590c18e0_4647	935e3caf510be0c503c97acef35381b2_4985	36ade0437952544bcc39850c777ef069_4842	S_aureus_9_01754
WP_000838204.1		PTS transporter subunit EIIC	4	4	1	6	2648				1529	1529	1529	e26b52046ef139bf63509f5b590c18e0_365	935e3caf510be0c503c97acef35381b2_3717	36ade0437952544bcc39850c777ef069_405	S_aureus_9_01154
WP_000887920.1		M20 family metallopeptidase	4	4	1	6	2100				1175	1175	1175	e26b52046ef139bf63509f5b590c18e0_997	935e3caf510be0c503c97acef35381b2_3051	36ade0437952544bcc39850c777ef069_1069	S_aureus_9_02291
dnaK		molecular chaperone DnaK	4	4	1	6	1661				1832	1832	1832	e26b52046ef139bf63509f5b590c18e0_2965	935e3caf510be0c503c97acef35381b2_925	36ade0437952544bcc39850c777ef069_3245	S_aureus_9_00185
WP_000934515.1		DUF5327 family protein	4	4	1	6	2068				377	380	379	e26b52046ef139bf63509f5b590c18e0_1061	935e3caf510be0c503c97acef35381b2_2987	36ade0437952544bcc39850c777ef069_1133	S_aureus_9_02185
WP_000429675.1		amino acid permease	4	4	1	6	385				1379	1379	1379	e26b52046ef139bf63509f5b590c18e0_4592	935e3caf510be0c503c97acef35381b2_5038	36ade0437952544bcc39850c777ef069_4789	S_aureus_9_01729
WP_000721550.1		osmoprotectant ABC transporter substrate-binding protein	4	4	1	6	2995				941	941	941	e26b52046ef139bf63509f5b590c18e0_4861	935e3caf510be0c503c97acef35381b2_4767	36ade0437952544bcc39850c777ef069_5056	S_aureus_9_00413
WP_000239820.1		ABC transporter permease	4	4	1	6	2930				962	962	962	e26b52046ef139bf63509f5b590c18e0_1736	935e3caf510be0c503c97acef35381b2_2282	36ade0437952544bcc39850c777ef069_1984	S_aureus_9_02081
WP_000831695.1		CamS family sex pheromone protein	4	4	1	6	1493				1199	1199	1199	e26b52046ef139bf63509f5b590c18e0_3768	935e3caf510be0c503c97acef35381b2_143	36ade0437952544bcc39850c777ef069_4022	S_aureus_9_01966
WP_064136541.1		CHAP domain-containing protein	4	4	1	6	3148				767	767	767	e26b52046ef139bf63509f5b590c18e0_5119	935e3caf510be0c503c97acef35381b2_4525	36ade0437952544bcc39850c777ef069_5298	S_aureus_9_00529
murT		lipid II isoglutaminyl synthase subunit MurT	4	4	1	6	1506				1313	1313	1313	e26b52046ef139bf63509f5b590c18e0_3742	935e3caf510be0c503c97acef35381b2_169	36ade0437952544bcc39850c777ef069_3996	S_aureus_9_01977
WP_172449171.1		FTR1 family iron permease	4	5	1.25	6	2739				173	1712	1371	e26b52046ef139bf63509f5b590c18e0_569	935e3caf510be0c503c97acef35381b2_3503	36ade0437952544bcc39850c777ef069_613	S_aureus_9_01565 S_aureus_9_01564
WP_001180280.1		ABC transporter permease	4	4	1	6	2931				881	881	881	e26b52046ef139bf63509f5b590c18e0_1738	935e3caf510be0c503c97acef35381b2_2280	36ade0437952544bcc39850c777ef069_1986	S_aureus_9_02082
WP_153227764.1		sodium:proton antiporter	4	4	1	6	2007				2042	2042	2042	e26b52046ef139bf63509f5b590c18e0_1179	935e3caf510be0c503c97acef35381b2_2871	36ade0437952544bcc39850c777ef069_1247	S_aureus_9_02043
WP_000829167.1		citrate synthase	4	4	1	6	1769				1121	1121	1121	e26b52046ef139bf63509f5b590c18e0_3185	935e3caf510be0c503c97acef35381b2_700	36ade0437952544bcc39850c777ef069_3465	S_aureus_9_00285
WP_001793589.1		DEAD/DEAH box helicase	4	4	1	6	1117				1082	1082	1082	e26b52046ef139bf63509f5b590c18e0_1425	935e3caf510be0c503c97acef35381b2_2623	36ade0437952544bcc39850c777ef069_1495	S_aureus_9_01289
mdeA		multidrug efflux MFS transporter MdeA	4	4	1	6	2962				1439	1439	1439	e26b52046ef139bf63509f5b590c18e0_4793	935e3caf510be0c503c97acef35381b2_4835	36ade0437952544bcc39850c777ef069_4988	S_aureus_9_00382
WP_000184383.1		acyl-CoA thioesterase	4	4	1	6	1520				530	530	530	e26b52046ef139bf63509f5b590c18e0_3712	935e3caf510be0c503c97acef35381b2_199	36ade0437952544bcc39850c777ef069_3966	S_aureus_9_01991
WP_000999205.1		acyl-CoA/acyl-ACP dehydrogenase	4	4	1	6	353				1154	1154	1154	e26b52046ef139bf63509f5b590c18e0_4528	935e3caf510be0c503c97acef35381b2_5102	36ade0437952544bcc39850c777ef069_4725	S_aureus_9_01868
WP_000565820.1		phosphatase PAP2 family protein	4	4	1	6	2197				674	674	674	e26b52046ef139bf63509f5b590c18e0_749	935e3caf510be0c503c97acef35381b2_3311	36ade0437952544bcc39850c777ef069_809	S_aureus_9_02143
WP_000649907.1		ABC transporter permease subunit	4	4	1	6	2863				1457	1457	1457	e26b52046ef139bf63509f5b590c18e0_3541	935e3caf510be0c503c97acef35381b2_332	36ade0437952544bcc39850c777ef069_3831	S_aureus_9_02258
WP_000076036.1		branched-chain amino acid aminotransferase	4	4	1	6	2095				1076	1076	1076	e26b52046ef139bf63509f5b590c18e0_1007	935e3caf510be0c503c97acef35381b2_3041	36ade0437952544bcc39850c777ef069_1079	S_aureus_9_02505
WP_000826997.1		hypothetical protein	4	4	1	6	432				614	629	623	e26b52046ef139bf63509f5b590c18e0_4701	935e3caf510be0c503c97acef35381b2_4933	36ade0437952544bcc39850c777ef069_4894	S_aureus_9_01779
WP_000867951.1		carbon-nitrogen family hydrolase	4	4	1	6	562				785	785	785	e26b52046ef139bf63509f5b590c18e0_3984	935e3caf510be0c503c97acef35381b2_5641	36ade0437952544bcc39850c777ef069_4170	S_aureus_9_01687
WP_000606210.1		epoxyqueuosine reductase QueH	4	4	1	6	3124				722	722	722	e26b52046ef139bf63509f5b590c18e0_5167	935e3caf510be0c503c97acef35381b2_4475	36ade0437952544bcc39850c777ef069_5348	S_aureus_9_00553
WP_000751207.1		CHAP domain-containing protein	4	4	1	6	2281				893	902	895	e26b52046ef139bf63509f5b590c18e0_453	935e3caf510be0c503c97acef35381b2_3635	36ade0437952544bcc39850c777ef069_491	S_aureus_9_01194
WP_111688678.1		UDPGP type 1 family protein	4	4	1	6	857				1187	1187	1187	e26b52046ef139bf63509f5b590c18e0_4308	935e3caf510be0c503c97acef35381b2_5322	36ade0437952544bcc39850c777ef069_4501	S_aureus_9_02328
WP_000781162.1		kinase-associated lipoprotein B	4	4	1	6	1014				383	383	383	e26b52046ef139bf63509f5b590c18e0_1656	935e3caf510be0c503c97acef35381b2_2362	36ade0437952544bcc39850c777ef069_1902	S_aureus_9_00767
hisS		histidine--tRNA ligase	4	4	1	6	1711				1262	1262	1262	e26b52046ef139bf63509f5b590c18e0_3064	935e3caf510be0c503c97acef35381b2_822	36ade0437952544bcc39850c777ef069_3344	S_aureus_9_00232
WP_111688527.1		FAD-binding oxidoreductase	4	4	1	6	2646				1145	1145	1145	e26b52046ef139bf63509f5b590c18e0_359	935e3caf510be0c503c97acef35381b2_3723	36ade0437952544bcc39850c777ef069_399	S_aureus_9_01152
rpsA		30S ribosomal protein S1	4	4	1	6	1380				1175	1175	1175	e26b52046ef139bf63509f5b590c18e0_2725	935e3caf510be0c503c97acef35381b2_1269	36ade0437952544bcc39850c777ef069_3027	S_aureus_9_00083
yqeK		bis(5'-nucleosyl)-tetraphosphatase (symmetrical) YqeK	4	4	1	6	1673				584	584	584	e26b52046ef139bf63509f5b590c18e0_2989	935e3caf510be0c503c97acef35381b2_899	36ade0437952544bcc39850c777ef069_3269	S_aureus_9_00197
WP_001245577.1		iron chelate uptake ABC transporter family permease subunit	4	4	1	6	1101				956	956	956	e26b52046ef139bf63509f5b590c18e0_1393	935e3caf510be0c503c97acef35381b2_2655	36ade0437952544bcc39850c777ef069_1463	S_aureus_9_01273
WP_000727537.1		DUF3139 domain-containing protein	4	4	1	6	32				344	365	359	e26b52046ef139bf63509f5b590c18e0_4733	935e3caf510be0c503c97acef35381b2_4899	36ade0437952544bcc39850c777ef069_4926	S_aureus_9_01794
WP_000127984.1		sensor histidine kinase	4	4	1	6	2629				1556	1556	1556	e26b52046ef139bf63509f5b590c18e0_319	935e3caf510be0c503c97acef35381b2_3759	36ade0437952544bcc39850c777ef069_365	S_aureus_9_01136
WP_001077823.1		energy-coupling factor transporter transmembrane protein EcfT	4	4	1	6	2356				833	833	833	e26b52046ef139bf63509f5b590c18e0_5365	935e3caf510be0c503c97acef35381b2_4275	36ade0437952544bcc39850c777ef069_5546	S_aureus_9_01339
WP_001234988.1		RNA-binding S4 domain-containing protein	4	4	1	6	2145				263	263	263	e26b52046ef139bf63509f5b590c18e0_870	935e3caf510be0c503c97acef35381b2_3190	36ade0437952544bcc39850c777ef069_930	S_aureus_9_02396
metC		PLP-dependent aspartate aminotransferase family protein	4	4	1	6	2752				1160	1160	1160	e26b52046ef139bf63509f5b590c18e0_595	935e3caf510be0c503c97acef35381b2_3477	36ade0437952544bcc39850c777ef069_639	S_aureus_9_01551
WP_000216727.1		hypothetical protein	4	4	1	6	1940				452	452	452	e26b52046ef139bf63509f5b590c18e0_1313	935e3caf510be0c503c97acef35381b2_2737	36ade0437952544bcc39850c777ef069_1381	S_aureus_9_01236
xerC		tyrosine recombinase XerC	4	4	1	6	319				896	896	896	e26b52046ef139bf63509f5b590c18e0_2274	935e3caf510be0c503c97acef35381b2_1743	36ade0437952544bcc39850c777ef069_2524	S_aureus_9_00648
WP_064136738.1		virulence factor	4	4	1	6	128				1124	1124	1124	e26b52046ef139bf63509f5b590c18e0_2632	935e3caf510be0c503c97acef35381b2_1364	36ade0437952544bcc39850c777ef069_2932	S_aureus_9_00039
WP_000282171.1		queuosine precursor transporter	4	4	1	6	126				695	704	701	e26b52046ef139bf63509f5b590c18e0_2638	935e3caf510be0c503c97acef35381b2_1358	36ade0437952544bcc39850c777ef069_2938	S_aureus_9_00041
WP_000659317.1		XTP/dITP diphosphatase	4	4	1	6	605				587	587	587	e26b52046ef139bf63509f5b590c18e0_2067	935e3caf510be0c503c97acef35381b2_1950	36ade0437952544bcc39850c777ef069_2319	S_aureus_9_01002
thiM		hydroxyethylthiazole kinase	4	4	1	6	2898				791	800	793	e26b52046ef139bf63509f5b590c18e0_4121	935e3caf510be0c503c97acef35381b2_5504	36ade0437952544bcc39850c777ef069_4313	S_aureus_9_01437
WP_000289215.1		MarR family transcriptional regulator	4	4	1	6	33				413	446	437	e26b52046ef139bf63509f5b590c18e0_4735	935e3caf510be0c503c97acef35381b2_4897	36ade0437952544bcc39850c777ef069_4928	S_aureus_9_00353
WP_000030070.1		aspartate aminotransferase family protein	4	4	1	6	3113				1337	1337	1337	e26b52046ef139bf63509f5b590c18e0_5189	935e3caf510be0c503c97acef35381b2_4449	36ade0437952544bcc39850c777ef069_5372	S_aureus_9_00565
WP_000677710.1		ABC-2 transporter permease	4	4	1	6	2746				629	629	629	e26b52046ef139bf63509f5b590c18e0_583	935e3caf510be0c503c97acef35381b2_3489	36ade0437952544bcc39850c777ef069_627	S_aureus_9_01557
groES		co-chaperone GroES	4	4	1	6	558				284	284	284	e26b52046ef139bf63509f5b590c18e0_3976	935e3caf510be0c503c97acef35381b2_5649	36ade0437952544bcc39850c777ef069_4162	S_aureus_9_01683
nixA		HoxN/HupN/NixA family nickel/cobalt transporter	4	4	1	6	2370				1016	1016	1016	e26b52046ef139bf63509f5b590c18e0_5389	935e3caf510be0c503c97acef35381b2_4249	36ade0437952544bcc39850c777ef069_5572	S_aureus_9_01353
fmhA		FemA/FemB family glycyltransferase FmhA	4	4	1	6	59				1250	1250	1250	e26b52046ef139bf63509f5b590c18e0_4785	935e3caf510be0c503c97acef35381b2_4843	36ade0437952544bcc39850c777ef069_4978	S_aureus_9_00378
WP_001259678.1		GNAT family N-acetyltransferase	4	4	1	6	1960				443	443	443	e26b52046ef139bf63509f5b590c18e0_1273	935e3caf510be0c503c97acef35381b2_2777	36ade0437952544bcc39850c777ef069_1341	S_aureus_9_01216
folP		dihydropteroate synthase	4	4	1	6	2137				803	803	803	e26b52046ef139bf63509f5b590c18e0_886	935e3caf510be0c503c97acef35381b2_3174	36ade0437952544bcc39850c777ef069_946	S_aureus_9_02388
WP_000365246.1		NUDIX hydrolase	4	4	1	6	940				542	542	542	e26b52046ef139bf63509f5b590c18e0_2800	935e3caf510be0c503c97acef35381b2_1090	36ade0437952544bcc39850c777ef069_3078	S_aureus_9_00106
cntL		D-histidine (S)-2-aminobutanoyltransferase CntL	4	4	1	6	3023				818	818	818	e26b52046ef139bf63509f5b590c18e0_4909	935e3caf510be0c503c97acef35381b2_4719	36ade0437952544bcc39850c777ef069_5104	S_aureus_9_00435
WP_001003793.1		amidohydrolase	4	4	1	6	160				1151	1151	1151	e26b52046ef139bf63509f5b590c18e0_2566	935e3caf510be0c503c97acef35381b2_1432	36ade0437952544bcc39850c777ef069_2868	S_aureus_9_00008
cobA		uroporphyrinogen-III C-methyltransferase	4	4	1	6	43				977	977	977	e26b52046ef139bf63509f5b590c18e0_4755	935e3caf510be0c503c97acef35381b2_4873	36ade0437952544bcc39850c777ef069_4948	S_aureus_9_00365
WP_001797427.1		Hsp20/alpha crystallin family protein	4	4	1	6	34				422	428	426	e26b52046ef139bf63509f5b590c18e0_4737	935e3caf510be0c503c97acef35381b2_4895	36ade0437952544bcc39850c777ef069_4930	S_aureus_9_00354
WP_001806672.1		glycerophosphoryl diester phosphodiesterase membrane domain-containing protein	4	4	1	6	2634				1763	1763	1763	e26b52046ef139bf63509f5b590c18e0_329	935e3caf510be0c503c97acef35381b2_3751	36ade0437952544bcc39850c777ef069_373	S_aureus_9_01140
sbnC		staphyloferrin B biosynthesis protein SbnC	4	4	1	6	2526				1754	1754	1754	e26b52046ef139bf63509f5b590c18e0_127	935e3caf510be0c503c97acef35381b2_3979	36ade0437952544bcc39850c777ef069_149	S_aureus_9_00969
WP_000581792.1		heavy-metal-associated domain-containing protein	4	4	1	6	2904				209	209	209	e26b52046ef139bf63509f5b590c18e0_4109	935e3caf510be0c503c97acef35381b2_5516	36ade0437952544bcc39850c777ef069_4301	S_aureus_9_01431
farE		fatty acid efflux MMPL transporter FarE	4	4	1	6	3163				2489	2489	2489	e26b52046ef139bf63509f5b590c18e0_5089	935e3caf510be0c503c97acef35381b2_4555	36ade0437952544bcc39850c777ef069_5268	S_aureus_9_00515
WP_001550030.1		hypothetical protein	4	4	1	6	2600				281	281	281	e26b52046ef139bf63509f5b590c18e0_273	935e3caf510be0c503c97acef35381b2_3819	36ade0437952544bcc39850c777ef069_305	S_aureus_9_00891
WP_111688525.1		Gfo/Idh/MocA family oxidoreductase	4	4	1	6	2624				1040	1040	1040	e26b52046ef139bf63509f5b590c18e0_309	935e3caf510be0c503c97acef35381b2_3769	36ade0437952544bcc39850c777ef069_355	S_aureus_9_01131
WP_000594810.1		CDP-glycerol glycerophosphotransferase family protein	4	4	1	6	2660				1169	1169	1169	e26b52046ef139bf63509f5b590c18e0_391	935e3caf510be0c503c97acef35381b2_3691	36ade0437952544bcc39850c777ef069_431	S_aureus_9_01166
WP_001106734.1		glycosyltransferase	4	4	1	6	2085				1472	1472	1472	e26b52046ef139bf63509f5b590c18e0_1027	935e3caf510be0c503c97acef35381b2_3021	36ade0437952544bcc39850c777ef069_1099	S_aureus_9_02168
WP_001096479.1		polyprenyl synthetase family protein	4	4	1	6	1374				959	959	959	e26b52046ef139bf63509f5b590c18e0_2713	935e3caf510be0c503c97acef35381b2_1281	36ade0437952544bcc39850c777ef069_3015	S_aureus_9_00077
lrgA		antiholin-like murein hydrolase modulator LrgA	4	4	1	6	2668				437	443	441	e26b52046ef139bf63509f5b590c18e0_407	935e3caf510be0c503c97acef35381b2_3675	36ade0437952544bcc39850c777ef069_447	S_aureus_9_01174
degA		LacI family transcriptional regulator	4	4	1	6	2678				998	998	998	e26b52046ef139bf63509f5b590c18e0_427	935e3caf510be0c503c97acef35381b2_3655	36ade0437952544bcc39850c777ef069_467	S_aureus_9_01183
fadA		thiolase family protein	4	4	1	6	2637				1184	1184	1184	e26b52046ef139bf63509f5b590c18e0_341	935e3caf510be0c503c97acef35381b2_3741	36ade0437952544bcc39850c777ef069_381	S_aureus_9_01143
ybeY		rRNA maturation RNase YbeY	4	4	1	6	1651				467	467	467	e26b52046ef139bf63509f5b590c18e0_2945	935e3caf510be0c503c97acef35381b2_945	36ade0437952544bcc39850c777ef069_3225	S_aureus_9_00175
WP_000974914.1		iron ABC transporter permease	4	4	1	6	851				1031	1031	1031	e26b52046ef139bf63509f5b590c18e0_4318	935e3caf510be0c503c97acef35381b2_5312	36ade0437952544bcc39850c777ef069_4511	S_aureus_9_02323
WP_001101594.1		CDP-glycerol glycerophosphotransferase family protein	4	4	1	6	1998				1103	1103	1103	e26b52046ef139bf63509f5b590c18e0_1197	935e3caf510be0c503c97acef35381b2_2853	36ade0437952544bcc39850c777ef069_1265	S_aureus_9_02034
WP_000998557.1		hypothetical protein	4	4	1	6	475				212	212	212	e26b52046ef139bf63509f5b590c18e0_2182	935e3caf510be0c503c97acef35381b2_1835	36ade0437952544bcc39850c777ef069_2434	S_aureus_9_00692
WP_000732082.1		DUF1307 domain-containing protein	4	4	1	6	3012				455	455	455	e26b52046ef139bf63509f5b590c18e0_4889	935e3caf510be0c503c97acef35381b2_4739	36ade0437952544bcc39850c777ef069_5084	S_aureus_9_00425
lip1		YSIRK domain-containing triacylglycerol lipase Lip1	4	4	1	6	2344				2042	2045	2042	e26b52046ef139bf63509f5b590c18e0_5341	935e3caf510be0c503c97acef35381b2_4299	36ade0437952544bcc39850c777ef069_5524	S_aureus_9_01327
WP_000479576.1		amino acid ABC transporter permease	4	4	1	6	2960				719	728	721	e26b52046ef139bf63509f5b590c18e0_4789	935e3caf510be0c503c97acef35381b2_4839	36ade0437952544bcc39850c777ef069_4984	S_aureus_9_00380
hlgA		bi-component gamma-hemolysin HlgAB subunit A	4	4	1	6	2968				929	965	938	e26b52046ef139bf63509f5b590c18e0_4805	935e3caf510be0c503c97acef35381b2_4823	36ade0437952544bcc39850c777ef069_5000	S_aureus_9_00387
WP_000769689.1		MAP domain-containing protein	4	4	1	6	987				434	434	434	e26b52046ef139bf63509f5b590c18e0_1710	935e3caf510be0c503c97acef35381b2_2308	36ade0437952544bcc39850c777ef069_1958	S_aureus_9_02068
gmpC		dipeptide ABC transporter glycylmethionine-binding lipoprotein	4	4	1	6	2189				842	842	842	e26b52046ef139bf63509f5b590c18e0_765	935e3caf510be0c503c97acef35381b2_3295	36ade0437952544bcc39850c777ef069_825	S_aureus_9_02136
der_1		dynamin family protein	4	4	1	6	116				3440	3440	3440	e26b52046ef139bf63509f5b590c18e0_2654	935e3caf510be0c503c97acef35381b2_1340	36ade0437952544bcc39850c777ef069_2956	S_aureus_9_00049
sspB		cysteine protease staphopain B	4	4	1	6	698				1181	1181	1181	e26b52046ef139bf63509f5b590c18e0_1854	935e3caf510be0c503c97acef35381b2_2163	36ade0437952544bcc39850c777ef069_2102	S_aureus_9_01102
menD		2-succinyl-5-enolpyruvyl-6-hydroxy-3-cyclohexene-1-carboxylic-acid synthase	4	4	1	6	694				1673	1673	1673	e26b52046ef139bf63509f5b590c18e0_1846	935e3caf510be0c503c97acef35381b2_2171	36ade0437952544bcc39850c777ef069_2094	S_aureus_9_01106
aroE		shikimate dehydrogenase	4	4	1	6	1676				806	806	806	e26b52046ef139bf63509f5b590c18e0_2995	935e3caf510be0c503c97acef35381b2_893	36ade0437952544bcc39850c777ef069_3275	S_aureus_9_00200
rnr		ribonuclease R	4	4	1	6	1152				2372	2372	2372	e26b52046ef139bf63509f5b590c18e0_1492	935e3caf510be0c503c97acef35381b2_2558	36ade0437952544bcc39850c777ef069_1560	S_aureus_9_00874
WP_000614712.1		hypothetical protein	4	4	1	6	645				482	482	482	e26b52046ef139bf63509f5b590c18e0_1985	935e3caf510be0c503c97acef35381b2_2032	36ade0437952544bcc39850c777ef069_2237	S_aureus_9_01041
WP_000645456.1		response regulator transcription factor LytR	4	4	1	6	2667				740	740	740	e26b52046ef139bf63509f5b590c18e0_405	935e3caf510be0c503c97acef35381b2_3677	36ade0437952544bcc39850c777ef069_445	S_aureus_9_01173
WP_000359085.1		DUF1934 domain-containing protein	4	4	1	6	2029				416	416	416	e26b52046ef139bf63509f5b590c18e0_1135	935e3caf510be0c503c97acef35381b2_2915	36ade0437952544bcc39850c777ef069_1203	S_aureus_9_02065
WP_000700927.1		carboxylesterase/lipase family protein	4	4	1	6	3004				1352	1352	1352	e26b52046ef139bf63509f5b590c18e0_4875	935e3caf510be0c503c97acef35381b2_4753	36ade0437952544bcc39850c777ef069_5070	S_aureus_9_00418
trpS		tryptophan--tRNA ligase	4	4	1	6	2932				989	989	989	e26b52046ef139bf63509f5b590c18e0_1740	935e3caf510be0c503c97acef35381b2_2278	36ade0437952544bcc39850c777ef069_1988	S_aureus_9_02083
WP_000184234.1		hypothetical protein	4	4	1	6	419				638	638	638	e26b52046ef139bf63509f5b590c18e0_4663	935e3caf510be0c503c97acef35381b2_4969	36ade0437952544bcc39850c777ef069_4858	S_aureus_9_01762
WP_001041916.1		alpha-glucosidase	4	4	1	6	1587				1649	1649	1649	e26b52046ef139bf63509f5b590c18e0_2816	935e3caf510be0c503c97acef35381b2_1074	36ade0437952544bcc39850c777ef069_3094	S_aureus_9_00114
WP_000781941.1		zinc-binding alcohol dehydrogenase family protein	4	4	1	6	840				1007	1007	1007	e26b52046ef139bf63509f5b590c18e0_4342	935e3caf510be0c503c97acef35381b2_5290	36ade0437952544bcc39850c777ef069_4533	S_aureus_9_02313
WP_000523668.1		SWIM zinc finger domain-containing protein	4	4	1	6	180				473	473	473	e26b52046ef139bf63509f5b590c18e0_2524	935e3caf510be0c503c97acef35381b2_1475	36ade0437952544bcc39850c777ef069_2826	S_aureus_9_01934
hfq		RNA chaperone Hfq	4	4	1	6	267				233	233	233	e26b52046ef139bf63509f5b590c18e0_2380	935e3caf510be0c503c97acef35381b2_1637	36ade0437952544bcc39850c777ef069_2630	S_aureus_9_02353
cvfB		RNA-binding virulence regulatory protein CvfB	4	4	1	6	167				902	902	902	e26b52046ef139bf63509f5b590c18e0_2552	935e3caf510be0c503c97acef35381b2_1447	36ade0437952544bcc39850c777ef069_2854	S_aureus_9_00001
WP_000084769.1		phosphatase PAP2 family protein	4	4	1	6	140				614	614	614	e26b52046ef139bf63509f5b590c18e0_2608	935e3caf510be0c503c97acef35381b2_1390	36ade0437952544bcc39850c777ef069_2908	S_aureus_9_00027
ribD		bifunctional diaminohydroxyphosphoribosylaminopyrimidine deaminase/5-amino-6-(5-phosphoribosylamino)uracil reductase RibD	4	4	1	6	1849				1031	1043	1040	e26b52046ef139bf63509f5b590c18e0_3347	935e3caf510be0c503c97acef35381b2_542	36ade0437952544bcc39850c777ef069_3623	S_aureus_9_02427
gtxA		flippase GtxA	4	4	1	6	2980				386	386	386	e26b52046ef139bf63509f5b590c18e0_4831	935e3caf510be0c503c97acef35381b2_4797	36ade0437952544bcc39850c777ef069_5026	S_aureus_9_00398
tadA		tRNA adenosine(34) deaminase TadA	4	4	1	6	2091				470	470	470	e26b52046ef139bf63509f5b590c18e0_1015	935e3caf510be0c503c97acef35381b2_3033	36ade0437952544bcc39850c777ef069_1087	S_aureus_9_02501
WP_000067350.1		ABC transporter ATP-binding protein	4	4	1	6	2611				1592	1592	1592	e26b52046ef139bf63509f5b590c18e0_283	935e3caf510be0c503c97acef35381b2_3795	36ade0437952544bcc39850c777ef069_329	S_aureus_9_01118
lytM		glycine-glycine endopeptidase LytM	4	4	1	6	2683				950	950	950	e26b52046ef139bf63509f5b590c18e0_439	935e3caf510be0c503c97acef35381b2_3645	36ade0437952544bcc39850c777ef069_475	S_aureus_9_01187
WP_000153466.1		Gfo/Idh/MocA family oxidoreductase	4	4	1	6	2623				1076	1076	1076	e26b52046ef139bf63509f5b590c18e0_307	935e3caf510be0c503c97acef35381b2_3771	36ade0437952544bcc39850c777ef069_353	S_aureus_9_01130
WP_000154532.1		3-hydroxyacyl-CoA dehydrogenase/enoyl-CoA hydratase family protein	4	4	1	6	2638				2261	2261	2261	e26b52046ef139bf63509f5b590c18e0_343	935e3caf510be0c503c97acef35381b2_3739	36ade0437952544bcc39850c777ef069_383	S_aureus_9_01144
WP_001126664.1		Veg family protein	4	4	1	6	2157				263	263	263	e26b52046ef139bf63509f5b590c18e0_844	935e3caf510be0c503c97acef35381b2_3216	36ade0437952544bcc39850c777ef069_904	S_aureus_9_02408
isaB		immunodominant staphylococcal antigen IsaB	4	4	1	6	3070				527	527	527	e26b52046ef139bf63509f5b590c18e0_5277	935e3caf510be0c503c97acef35381b2_4363	36ade0437952544bcc39850c777ef069_5460	S_aureus_9_00600
essA		type VII secretion protein EssA	4	4	1	6	2278				458	458	458	e26b52046ef139bf63509f5b590c18e0_459	935e3caf510be0c503c97acef35381b2_3629	36ade0437952544bcc39850c777ef069_497	S_aureus_9_01197
WP_000036088.1		DUF1659 domain-containing protein	4	4	1	6	2016				203	203	203	e26b52046ef139bf63509f5b590c18e0_1161	935e3caf510be0c503c97acef35381b2_2889	36ade0437952544bcc39850c777ef069_1229	S_aureus_9_02052
WP_001172340.1		AMP-binding protein	4	4	1	6	3108				1598	1619	1603	e26b52046ef139bf63509f5b590c18e0_5199	935e3caf510be0c503c97acef35381b2_4439	36ade0437952544bcc39850c777ef069_5382	S_aureus_9_00569
WP_000948991.1		ABC transporter ATP-binding protein	4	4	1	6	2997				1226	1226	1226	e26b52046ef139bf63509f5b590c18e0_4865	935e3caf510be0c503c97acef35381b2_4763	36ade0437952544bcc39850c777ef069_5060	S_aureus_9_00415
WP_001241179.1		glycosyltransferase family 2 protein	4	4	1	6	1997				1061	1061	1061	e26b52046ef139bf63509f5b590c18e0_1199	935e3caf510be0c503c97acef35381b2_2851	36ade0437952544bcc39850c777ef069_1267	S_aureus_9_02033
WP_000953569.1		oxidoreductase	4	4	1	6	3117				860	860	860	e26b52046ef139bf63509f5b590c18e0_5181	935e3caf510be0c503c97acef35381b2_4457	36ade0437952544bcc39850c777ef069_5364	S_aureus_9_00561
WP_000370925.1		Cof-type HAD-IIB family hydrolase	4	4	1	6	91				857	857	857	e26b52046ef139bf63509f5b590c18e0_4238	935e3caf510be0c503c97acef35381b2_5385	36ade0437952544bcc39850c777ef069_4436	S_aureus_9_01492
sepA		multidrug efflux transporter SepA	4	4	1	6	859				467	473	471	e26b52046ef139bf63509f5b590c18e0_4302	935e3caf510be0c503c97acef35381b2_5328	36ade0437952544bcc39850c777ef069_4495	S_aureus_9_02331
WP_000469890.1		undecaprenyl-diphosphate phosphatase	4	4	1	6	1953				875	875	875	e26b52046ef139bf63509f5b590c18e0_1287	935e3caf510be0c503c97acef35381b2_2763	36ade0437952544bcc39850c777ef069_1355	S_aureus_9_01223
WP_000379892.1		threonylcarbamoyl-AMP synthase	4	4	1	6	2873				1046	1046	1046	e26b52046ef139bf63509f5b590c18e0_4170	935e3caf510be0c503c97acef35381b2_5455	36ade0437952544bcc39850c777ef069_4362	S_aureus_9_01460
isdB		heme uptake protein IsdB	4	4	1	6	628				1925	1943	1934	e26b52046ef139bf63509f5b590c18e0_2019	935e3caf510be0c503c97acef35381b2_1998	36ade0437952544bcc39850c777ef069_2271	S_aureus_9_01024
nadD		nicotinate (nicotinamide) nucleotide adenylyltransferase	4	4	1	6	1674				569	569	569	e26b52046ef139bf63509f5b590c18e0_2991	935e3caf510be0c503c97acef35381b2_897	36ade0437952544bcc39850c777ef069_3271	S_aureus_9_00198
purD		phosphoribosylamine--glycine ligase	4	4	1	6	725				1247	1247	1247	e26b52046ef139bf63509f5b590c18e0_1910	935e3caf510be0c503c97acef35381b2_2107	36ade0437952544bcc39850c777ef069_2158	S_aureus_9_01076
WP_045172676.1		FAD/NAD(P)-binding protein	4	4	1	6	1022				1154	1154	1154	e26b52046ef139bf63509f5b590c18e0_1640	935e3caf510be0c503c97acef35381b2_2378	36ade0437952544bcc39850c777ef069_1886	S_aureus_9_00775
WP_228764724.1		hypothetical protein	4	7	1.75	6	2541				92	725	407	e26b52046ef139bf63509f5b590c18e0_161 e26b52046ef139bf63509f5b590c18e0_163	935e3caf510be0c503c97acef35381b2_3945 935e3caf510be0c503c97acef35381b2_3943	36ade0437952544bcc39850c777ef069_183 36ade0437952544bcc39850c777ef069_185	S_aureus_9_00953
WP_001246009.1		helix-turn-helix transcriptional regulator	4	4	1	6	2743				203	203	203	e26b52046ef139bf63509f5b590c18e0_577	935e3caf510be0c503c97acef35381b2_3495	36ade0437952544bcc39850c777ef069_621	S_aureus_9_01560
WP_000499647.1		hypothetical protein	4	4	1	6	217				233	236	233	e26b52046ef139bf63509f5b590c18e0_2450	935e3caf510be0c503c97acef35381b2_1551	36ade0437952544bcc39850c777ef069_2752	S_aureus_9_01899
argJ		bifunctional glutamate N-acetyltransferase/amino-acid acetyltransferase ArgJ	4	4	1	6	2588				1241	1241	1241	e26b52046ef139bf63509f5b590c18e0_249	935e3caf510be0c503c97acef35381b2_3843	36ade0437952544bcc39850c777ef069_281	S_aureus_9_00902
WP_000505966.1		hypothetical protein	4	4	1	6	732				542	542	542	e26b52046ef139bf63509f5b590c18e0_1925	935e3caf510be0c503c97acef35381b2_2092	36ade0437952544bcc39850c777ef069_2173	S_aureus_9_01069
WP_000625079.1		aminotransferase class I/II-fold pyridoxal phosphate-dependent enzyme	4	4	1	6	3154				1154	1154	1154	e26b52046ef139bf63509f5b590c18e0_5107	935e3caf510be0c503c97acef35381b2_4537	36ade0437952544bcc39850c777ef069_5286	S_aureus_9_00523
WP_153227808.1		DHA2 family efflux MFS transporter permease subunit	4	4	1	6	420				1931	1931	1931	e26b52046ef139bf63509f5b590c18e0_4665	935e3caf510be0c503c97acef35381b2_4967	36ade0437952544bcc39850c777ef069_4860	S_aureus_9_01763
WP_000088649.1		MBL fold metallo-hydrolase	4	4	1	6	2409				791	800	797	e26b52046ef139bf63509f5b590c18e0_53	935e3caf510be0c503c97acef35381b2_4167	36ade0437952544bcc39850c777ef069_53	S_aureus_9_01395
WP_000668339.1		YkyA family protein	4	4	1	6	664				626	626	626	e26b52046ef139bf63509f5b590c18e0_1947	935e3caf510be0c503c97acef35381b2_2070	36ade0437952544bcc39850c777ef069_2199	S_aureus_9_01059
WP_001062658.1		pyruvate oxidase	4	4	1	6	3177				1739	1739	1739	e26b52046ef139bf63509f5b590c18e0_5061	935e3caf510be0c503c97acef35381b2_4581	36ade0437952544bcc39850c777ef069_5242	S_aureus_9_00501
pheT		phenylalanine--tRNA ligase subunit beta	4	4	1	6	617				2402	2402	2402	e26b52046ef139bf63509f5b590c18e0_2041	935e3caf510be0c503c97acef35381b2_1976	36ade0437952544bcc39850c777ef069_2293	S_aureus_9_01014
yfhO		lipoteichoic acid-specific glycosyltransferase YfhO	4	4	1	6	327				2606	2606	2606	e26b52046ef139bf63509f5b590c18e0_2254	935e3caf510be0c503c97acef35381b2_1763	36ade0437952544bcc39850c777ef069_2508	S_aureus_9_00656
WP_000564316.1		metal ABC transporter permease	4	4	1	6	1636				863	872	865	e26b52046ef139bf63509f5b590c18e0_2915	935e3caf510be0c503c97acef35381b2_975	36ade0437952544bcc39850c777ef069_3195	S_aureus_9_00160
rsbW		anti-sigma B factor RsbW	4	4	1	6	2925				479	479	479	e26b52046ef139bf63509f5b590c18e0_4067	935e3caf510be0c503c97acef35381b2_5558	36ade0437952544bcc39850c777ef069_4259	S_aureus_9_02522
WP_000145555.1		DUF871 domain-containing protein	4	4	1	6	2596				1055	1055	1055	e26b52046ef139bf63509f5b590c18e0_265	935e3caf510be0c503c97acef35381b2_3827	36ade0437952544bcc39850c777ef069_297	S_aureus_9_00895
WP_001836606.1		GNAT family N-acetyltransferase	4	4	1	6	2355				497	497	497	e26b52046ef139bf63509f5b590c18e0_5363	935e3caf510be0c503c97acef35381b2_4277	36ade0437952544bcc39850c777ef069_5544	S_aureus_9_01338
opuD_3		BCCT family transporter	4	4	1	6	841				1562	1562	1562	e26b52046ef139bf63509f5b590c18e0_4340	935e3caf510be0c503c97acef35381b2_5292	36ade0437952544bcc39850c777ef069_4531	S_aureus_9_02314
WP_000070831.1		DUF4887 domain-containing protein	4	4	1	6	1142				629	629	629	e26b52046ef139bf63509f5b590c18e0_1472	935e3caf510be0c503c97acef35381b2_2578	36ade0437952544bcc39850c777ef069_1540	S_aureus_9_00884
dapB		4-hydroxy-tetrahydrodipicolinate reductase	4	4	1	6	162				722	722	722	e26b52046ef139bf63509f5b590c18e0_2562	935e3caf510be0c503c97acef35381b2_1436	36ade0437952544bcc39850c777ef069_2864	S_aureus_9_00006
cap8O		type 8 capsular polysaccharide synthesis protein Cap8O	4	4	1	6	2570				1262	1262	1262	e26b52046ef139bf63509f5b590c18e0_211	935e3caf510be0c503c97acef35381b2_3881	36ade0437952544bcc39850c777ef069_243	S_aureus_9_00922
hssS		heme sensor histidine kinase HssS	4	4	1	6	438				1373	1373	1373	e26b52046ef139bf63509f5b590c18e0_4689	935e3caf510be0c503c97acef35381b2_4945	36ade0437952544bcc39850c777ef069_4882	S_aureus_9_01773
WP_001005509.1		fructosamine kinase family protein	4	4	1	6	3127				866	866	866	e26b52046ef139bf63509f5b590c18e0_5161	935e3caf510be0c503c97acef35381b2_4481	36ade0437952544bcc39850c777ef069_5342	S_aureus_9_00550
WP_000587616.1		type II toxin-antitoxin system Phd/YefM family antitoxin	4	4	1	6	3011				257	257	257	e26b52046ef139bf63509f5b590c18e0_4887	935e3caf510be0c503c97acef35381b2_4741	36ade0437952544bcc39850c777ef069_5082	S_aureus_9_00424
ytkD		nucleoside triphosphatase YtkD	4	4	1	6	1868				473	479	474	e26b52046ef139bf63509f5b590c18e0_3391	935e3caf510be0c503c97acef35381b2_502	36ade0437952544bcc39850c777ef069_3663	S_aureus_9_02447
WP_064136613.1		bifunctional metallophosphatase/5'-nucleotidase	4	4	1	6	1044				1319	1319	1319	e26b52046ef139bf63509f5b590c18e0_1596	935e3caf510be0c503c97acef35381b2_2422	36ade0437952544bcc39850c777ef069_1842	S_aureus_9_00796
tilS		tRNA lysidine(34) synthetase TilS	4	4	1	6	2142				1295	1295	1295	e26b52046ef139bf63509f5b590c18e0_876	935e3caf510be0c503c97acef35381b2_3184	36ade0437952544bcc39850c777ef069_936	S_aureus_9_02393
bcrA_1		ATP-binding cassette domain-containing protein	4	4	1	6	3206				695	695	695	e26b52046ef139bf63509f5b590c18e0_5007	935e3caf510be0c503c97acef35381b2_4635	36ade0437952544bcc39850c777ef069_5188	S_aureus_9_00475
tsaD		tRNA (adenosine(37)-N6)-threonylcarbamoyltransferase complex transferase subunit TsaD	4	4	1	6	581				1025	1025	1025	e26b52046ef139bf63509f5b590c18e0_4018	935e3caf510be0c503c97acef35381b2_5607	36ade0437952544bcc39850c777ef069_4206	S_aureus_9_01702
WP_000753321.1		CHAP domain-containing protein	4	4	1	6	1126				839	839	839	e26b52046ef139bf63509f5b590c18e0_1440	935e3caf510be0c503c97acef35381b2_2608	36ade0437952544bcc39850c777ef069_1510	S_aureus_9_01294
WP_001117047.1		DUF2188 domain-containing protein	4	4	1	6	3214				416	416	416	e26b52046ef139bf63509f5b590c18e0_4997	935e3caf510be0c503c97acef35381b2_4645	36ade0437952544bcc39850c777ef069_5172	S_aureus_9_00468
capN		capsular polysaccharide type 5/8 biosynthesis epimerase CapN	4	4	1	6	2569				887	887	887	e26b52046ef139bf63509f5b590c18e0_209	935e3caf510be0c503c97acef35381b2_3883	36ade0437952544bcc39850c777ef069_241	S_aureus_9_00923
WP_001092409.1		K(+)-transporting ATPase subunit C	4	4	1	6	2915				560	560	560	e26b52046ef139bf63509f5b590c18e0_4087	935e3caf510be0c503c97acef35381b2_5538	36ade0437952544bcc39850c777ef069_4279	S_aureus_9_01421
brnQ		branched-chain amino acid transport system II carrier protein	4	4	1	6	2591				1355	1355	1355	e26b52046ef139bf63509f5b590c18e0_255	935e3caf510be0c503c97acef35381b2_3837	36ade0437952544bcc39850c777ef069_287	S_aureus_9_00899
WP_000173866.1		ABC transporter ATP-binding protein	4	4	1	6	3018				815	815	815	e26b52046ef139bf63509f5b590c18e0_4899	935e3caf510be0c503c97acef35381b2_4729	36ade0437952544bcc39850c777ef069_5094	S_aureus_9_00430
luxA		LLM class flavin-dependent oxidoreductase	4	4	1	6	2733				1061	1061	1061	e26b52046ef139bf63509f5b590c18e0_557	935e3caf510be0c503c97acef35381b2_3515	36ade0437952544bcc39850c777ef069_601	S_aureus_9_01571
WP_000157635.1		YeiH family protein	4	4	1	6	2735				995	995	995	e26b52046ef139bf63509f5b590c18e0_561	935e3caf510be0c503c97acef35381b2_3511	36ade0437952544bcc39850c777ef069_605	S_aureus_9_01569
srtB		class B sortase	4	4	1	6	622				734	734	734	e26b52046ef139bf63509f5b590c18e0_2031	935e3caf510be0c503c97acef35381b2_1986	36ade0437952544bcc39850c777ef069_2283	S_aureus_9_01018
WP_001251935.1		hypothetical protein	4	4	1	6	854				260	260	260	e26b52046ef139bf63509f5b590c18e0_4312	935e3caf510be0c503c97acef35381b2_5318	36ade0437952544bcc39850c777ef069_4505	S_aureus_9_02326
WP_000147095.1		metal-dependent hydrolase	4	4	1	6	855				515	515	515	e26b52046ef139bf63509f5b590c18e0_4310	935e3caf510be0c503c97acef35381b2_5320	36ade0437952544bcc39850c777ef069_4503	S_aureus_9_02327
WP_001024386.1		SDR family oxidoreductase	4	4	1	6	2798				845	845	845	e26b52046ef139bf63509f5b590c18e0_675	935e3caf510be0c503c97acef35381b2_3381	36ade0437952544bcc39850c777ef069_727	S_aureus_9_01512
WP_001163740.1		NAD(P)-binding domain-containing protein	4	4	1	6	3131				1106	1106	1106	e26b52046ef139bf63509f5b590c18e0_5153	935e3caf510be0c503c97acef35381b2_4489	36ade0437952544bcc39850c777ef069_5334	S_aureus_9_00546
WP_000902119.1		ATP-dependent DNA helicase	4	4	1	6	1388				1379	1379	1379	e26b52046ef139bf63509f5b590c18e0_2741	935e3caf510be0c503c97acef35381b2_1257	36ade0437952544bcc39850c777ef069_3039	S_aureus_9_00088
WP_000826862.1		MFS transporter	4	4	1	6	2583				1250	1250	1250	e26b52046ef139bf63509f5b590c18e0_239	935e3caf510be0c503c97acef35381b2_3853	36ade0437952544bcc39850c777ef069_271	S_aureus_9_00907
WP_001244301.1		membrane protein	4	4	1	6	1612				218	218	218	e26b52046ef139bf63509f5b590c18e0_2866	935e3caf510be0c503c97acef35381b2_1024	36ade0437952544bcc39850c777ef069_3146	S_aureus_9_00138
WP_000217458.1		SDR family oxidoreductase	4	4	1	6	3033				695	695	695	e26b52046ef139bf63509f5b590c18e0_4927	935e3caf510be0c503c97acef35381b2_4699	36ade0437952544bcc39850c777ef069_5118	S_aureus_9_00443
WP_000913019.1		ATP-binding cassette domain-containing protein	4	4	1	6	753				605	605	605	e26b52046ef139bf63509f5b590c18e0_4512	935e3caf510be0c503c97acef35381b2_5118	36ade0437952544bcc39850c777ef069_4709	S_aureus_9_01860
WP_000548937.1		ABC transporter permease	4	4	1	6	177				830	830	830	e26b52046ef139bf63509f5b590c18e0_2530	935e3caf510be0c503c97acef35381b2_1469	36ade0437952544bcc39850c777ef069_2832	S_aureus_9_01937
sak		staphylokinase	4	4	1	6	1220				491	491	491	e26b52046ef139bf63509f5b590c18e0_3860	935e3caf510be0c503c97acef35381b2_49	36ade0437952544bcc39850c777ef069_1816	S_aureus_9_01618
WP_064136771.1		ABC transporter permease	4	4	1	6	2685				920	920	920	e26b52046ef139bf63509f5b590c18e0_443	935e3caf510be0c503c97acef35381b2_3641	36ade0437952544bcc39850c777ef069_479	S_aureus_9_01189
WP_000224612.1		CYTH domain-containing protein	4	4	1	6	2955				593	593	593	e26b52046ef139bf63509f5b590c18e0_1754	935e3caf510be0c503c97acef35381b2_2264	36ade0437952544bcc39850c777ef069_2006	S_aureus_9_02090
pdxT		pyridoxal 5'-phosphate synthase glutaminase subunit PdxT	4	4	1	6	2130				560	560	560	e26b52046ef139bf63509f5b590c18e0_936	935e3caf510be0c503c97acef35381b2_3112	36ade0437952544bcc39850c777ef069_1008	S_aureus_9_02262
WP_001064816.1		ABC transporter ATP-binding protein/permease	4	4	1	6	2978				1763	1763	1763	e26b52046ef139bf63509f5b590c18e0_4827	935e3caf510be0c503c97acef35381b2_4801	36ade0437952544bcc39850c777ef069_5022	S_aureus_9_00397
WP_000977774.1		tandem-type lipoprotein	4	4	1	6	2504				770	770	770	e26b52046ef139bf63509f5b590c18e0_87	935e3caf510be0c503c97acef35381b2_4019	36ade0437952544bcc39850c777ef069_103	S_aureus_9_00989
truA		tRNA pseudouridine(38-40) synthase TruA	4	4	1	6	813				803	803	803	e26b52046ef139bf63509f5b590c18e0_4392	935e3caf510be0c503c97acef35381b2_5238	36ade0437952544bcc39850c777ef069_4587	S_aureus_9_01803
WP_000545115.1		hypothetical protein	4	4	1	6	1958				299	299	299	e26b52046ef139bf63509f5b590c18e0_1277	935e3caf510be0c503c97acef35381b2_2773	36ade0437952544bcc39850c777ef069_1345	S_aureus_9_01218
WP_000755946.1		(deoxy)nucleoside triphosphate pyrophosphohydrolase	4	4	1	6	3045				392	392	392	e26b52046ef139bf63509f5b590c18e0_4953	935e3caf510be0c503c97acef35381b2_4681	36ade0437952544bcc39850c777ef069_5136	S_aureus_9_00451
WP_000163989.1		6-phospho-beta-glucosidase	4	4	1	6	2672				1436	1436	1436	e26b52046ef139bf63509f5b590c18e0_415	935e3caf510be0c503c97acef35381b2_3667	36ade0437952544bcc39850c777ef069_455	S_aureus_9_01178
vraE		peptide resistance ABC transporter permease subunit VraE	4	4	1	6	2374				1880	1880	1880	e26b52046ef139bf63509f5b590c18e0_5397	935e3caf510be0c503c97acef35381b2_4241	36ade0437952544bcc39850c777ef069_5580	S_aureus_9_01357
WP_001788648.1		YjjG family noncanonical pyrimidine nucleotidase	4	4	1	6	445				686	695	692	e26b52046ef139bf63509f5b590c18e0_2120	935e3caf510be0c503c97acef35381b2_1897	36ade0437952544bcc39850c777ef069_2372	S_aureus_9_00722
hxlB		6-phospho-3-hexuloisomerase	4	4	1	6	2078				548	548	548	e26b52046ef139bf63509f5b590c18e0_1041	935e3caf510be0c503c97acef35381b2_3007	36ade0437952544bcc39850c777ef069_1113	S_aureus_9_02175
WP_042727680.1		alpha/beta hydrolase	4	4	1	6	3134				830	830	830	e26b52046ef139bf63509f5b590c18e0_5147	935e3caf510be0c503c97acef35381b2_4495	36ade0437952544bcc39850c777ef069_5328	S_aureus_9_00543
WP_000184400.1		MBL fold metallo-hydrolase	4	4	1	6	3101				686	686	686	e26b52046ef139bf63509f5b590c18e0_5213	935e3caf510be0c503c97acef35381b2_4425	36ade0437952544bcc39850c777ef069_5396	S_aureus_9_00575
hxlA		3-hexulose-6-phosphate synthase	4	4	1	6	2079				632	632	632	e26b52046ef139bf63509f5b590c18e0_1039	935e3caf510be0c503c97acef35381b2_3009	36ade0437952544bcc39850c777ef069_1111	S_aureus_9_02174
WP_000190726.1		AzlC family ABC transporter permease	4	4	1	6	2397				695	695	695	e26b52046ef139bf63509f5b590c18e0_22	935e3caf510be0c503c97acef35381b2_4198	36ade0437952544bcc39850c777ef069_22	S_aureus_9_01381
WP_000169042.1		DUF2922 domain-containing protein	4	4	1	6	2017				224	224	224	e26b52046ef139bf63509f5b590c18e0_1159	935e3caf510be0c503c97acef35381b2_2891	36ade0437952544bcc39850c777ef069_1227	S_aureus_9_02053
WP_000170610.1		YktB family protein	4	4	1	6	650				614	614	614	e26b52046ef139bf63509f5b590c18e0_1975	935e3caf510be0c503c97acef35381b2_2042	36ade0437952544bcc39850c777ef069_2227	S_aureus_9_01045
leuB		3-isopropylmalate dehydrogenase	4	4	1	6	590				1046	1046	1046	e26b52046ef139bf63509f5b590c18e0_4038	935e3caf510be0c503c97acef35381b2_5587	36ade0437952544bcc39850c777ef069_4226	S_aureus_9_01711
rseP		RIP metalloprotease RseP	4	4	1	6	307				1286	1286	1286	e26b52046ef139bf63509f5b590c18e0_2298	935e3caf510be0c503c97acef35381b2_1719	36ade0437952544bcc39850c777ef069_2548	S_aureus_9_00638
WP_000985895.1		LLM class flavin-dependent oxidoreductase	4	4	1	6	1702				1013	1013	1013	e26b52046ef139bf63509f5b590c18e0_3045	935e3caf510be0c503c97acef35381b2_841	36ade0437952544bcc39850c777ef069_3325	S_aureus_9_00225
WP_000833797.1		zinc ribbon domain-containing protein	4	4	1	6	425				1382	1382	1382	e26b52046ef139bf63509f5b590c18e0_4675	935e3caf510be0c503c97acef35381b2_4957	36ade0437952544bcc39850c777ef069_4870	S_aureus_9_01767
WP_000798984.1		PepSY domain-containing protein	4	4	1	6	115				1337	1340	1339	e26b52046ef139bf63509f5b590c18e0_2656	935e3caf510be0c503c97acef35381b2_1338	36ade0437952544bcc39850c777ef069_2958	S_aureus_9_00050
WP_000605278.1		amino acid adenylation domain-containing protein	4	4	1	6	2584				7175	7175	7175	e26b52046ef139bf63509f5b590c18e0_241	935e3caf510be0c503c97acef35381b2_3851	36ade0437952544bcc39850c777ef069_273	S_aureus_9_00906
mecA		adaptor protein MecA	4	4	1	6	2934				719	719	719	e26b52046ef139bf63509f5b590c18e0_1744	935e3caf510be0c503c97acef35381b2_2274	36ade0437952544bcc39850c777ef069_1992	S_aureus_9_02085
WP_001033876.1		5'-nucleotidase, lipoprotein e(P4) family	4	4	1	6	2700				890	890	890	e26b52046ef139bf63509f5b590c18e0_491	935e3caf510be0c503c97acef35381b2_3581	36ade0437952544bcc39850c777ef069_535	S_aureus_9_01602
WP_000927361.1		BglG family transcription antiterminator	4	4	1	6	95				2132	2132	2132	e26b52046ef139bf63509f5b590c18e0_4246	935e3caf510be0c503c97acef35381b2_5377	36ade0437952544bcc39850c777ef069_4444	S_aureus_9_01496
WP_064136501.1		anthranilate synthase component I family protein	4	4	1	6	1080				1151	1151	1151	e26b52046ef139bf63509f5b590c18e0_1349	935e3caf510be0c503c97acef35381b2_2701	36ade0437952544bcc39850c777ef069_1417	S_aureus_9_01254
WP_000067115.1		GNAT family N-acetyltransferase	4	4	1	6	3199				284	284	284	e26b52046ef139bf63509f5b590c18e0_5021	935e3caf510be0c503c97acef35381b2_4621	36ade0437952544bcc39850c777ef069_5202	S_aureus_9_00482
feoB		ferrous iron transport protein B	4	4	1	6	3165				1994	1994	1994	e26b52046ef139bf63509f5b590c18e0_5085	935e3caf510be0c503c97acef35381b2_4559	36ade0437952544bcc39850c777ef069_5264	S_aureus_9_00513
WP_000195907.1		cyclase family protein	4	4	1	6	2749				752	752	752	e26b52046ef139bf63509f5b590c18e0_589	935e3caf510be0c503c97acef35381b2_3483	36ade0437952544bcc39850c777ef069_633	S_aureus_9_01554
WP_000655669.1		MTH1187 family thiamine-binding protein	4	4	1	6	278				293	293	293	e26b52046ef139bf63509f5b590c18e0_2356	935e3caf510be0c503c97acef35381b2_1661	36ade0437952544bcc39850c777ef069_2606	S_aureus_9_02341
citN		CitMHS family transporter	4	4	1	6	3096				1370	1370	1370	e26b52046ef139bf63509f5b590c18e0_5225	935e3caf510be0c503c97acef35381b2_4413	36ade0437952544bcc39850c777ef069_5408	S_aureus_9_00579
WP_000007967.1		TVP38/TMEM64 family protein	4	4	1	6	1004				575	575	575	e26b52046ef139bf63509f5b590c18e0_1676	935e3caf510be0c503c97acef35381b2_2342	36ade0437952544bcc39850c777ef069_1922	S_aureus_9_00757
WP_045173699.1		energy-coupling factor transporter ATPase	4	4	1	6	811				860	860	860	e26b52046ef139bf63509f5b590c18e0_4396	935e3caf510be0c503c97acef35381b2_5234	36ade0437952544bcc39850c777ef069_4591	S_aureus_9_01805
WP_001118417.1		YlaN family protein	4	4	1	6	644				275	275	275	e26b52046ef139bf63509f5b590c18e0_1987	935e3caf510be0c503c97acef35381b2_2030	36ade0437952544bcc39850c777ef069_2239	S_aureus_9_01040
argB		acetylglutamate kinase	4	4	1	6	2587				764	764	764	e26b52046ef139bf63509f5b590c18e0_247	935e3caf510be0c503c97acef35381b2_3845	36ade0437952544bcc39850c777ef069_279	S_aureus_9_00903
WP_000803168.1		SMC family ATPase	4	4	1	6	210				3029	3029	3029	e26b52046ef139bf63509f5b590c18e0_2464	935e3caf510be0c503c97acef35381b2_1537	36ade0437952544bcc39850c777ef069_2766	S_aureus_9_01905
WP_000638613.1		GNAT family N-acetyltransferase	4	4	1	6	1957				542	542	542	e26b52046ef139bf63509f5b590c18e0_1279	935e3caf510be0c503c97acef35381b2_2771	36ade0437952544bcc39850c777ef069_1347	S_aureus_9_01219
WP_001031405.1		fructose bisphosphate aldolase	4	4	1	6	3111				890	890	890	e26b52046ef139bf63509f5b590c18e0_5193	935e3caf510be0c503c97acef35381b2_4445	36ade0437952544bcc39850c777ef069_5376	S_aureus_9_00567
treR		trehalose operon repressor	4	4	1	6	2177				728	728	728	e26b52046ef139bf63509f5b590c18e0_792	935e3caf510be0c503c97acef35381b2_3268	36ade0437952544bcc39850c777ef069_852	S_aureus_9_02123
WP_001793603.1		DUF443 domain-containing protein	4	4	1	6	2043				632	641	638	e26b52046ef139bf63509f5b590c18e0_1107	935e3caf510be0c503c97acef35381b2_2943	36ade0437952544bcc39850c777ef069_1175	S_aureus_9_02213
lacC		tagatose-6-phosphate kinase	4	4	1	6	833				932	932	932	e26b52046ef139bf63509f5b590c18e0_4356	935e3caf510be0c503c97acef35381b2_5276	36ade0437952544bcc39850c777ef069_4547	S_aureus_9_02306
WP_000449066.1		protein-ADP-ribose hydrolase	4	4	1	6	2721				800	800	800	e26b52046ef139bf63509f5b590c18e0_531	935e3caf510be0c503c97acef35381b2_3541	36ade0437952544bcc39850c777ef069_575	S_aureus_9_01584
WP_001237629.1		hypothetical protein	4	4	1	6	3112				416	416	416	e26b52046ef139bf63509f5b590c18e0_5191	935e3caf510be0c503c97acef35381b2_4447	36ade0437952544bcc39850c777ef069_5374	S_aureus_9_00566
WP_000953758.1		alkaline phosphatase	4	4	1	6	3083				1424	1424	1424	e26b52046ef139bf63509f5b590c18e0_5251	935e3caf510be0c503c97acef35381b2_4389	36ade0437952544bcc39850c777ef069_5434	S_aureus_9_00588
sirB		staphyloferrin B ABC transporter permease subunit SirB	4	4	1	6	2522				995	995	995	e26b52046ef139bf63509f5b590c18e0_119	935e3caf510be0c503c97acef35381b2_3987	36ade0437952544bcc39850c777ef069_141	S_aureus_9_00973
WP_000167974.1		CDP-glycerol glycerophosphotransferase family protein	4	4	1	6	2659				1694	1694	1694	e26b52046ef139bf63509f5b590c18e0_389	935e3caf510be0c503c97acef35381b2_3693	36ade0437952544bcc39850c777ef069_429	S_aureus_9_01165
hisA		1-(5-phosphoribosyl)-5-((5-phosphoribosylamino)methylideneamino)imidazole-4-carboxamide isomerase	4	4	1	6	2347				704	704	704	e26b52046ef139bf63509f5b590c18e0_5347	935e3caf510be0c503c97acef35381b2_4293	36ade0437952544bcc39850c777ef069_5528	S_aureus_9_01330
WP_072362001.1		DMT family transporter	4	4	1	6	3182				935	962	941	e26b52046ef139bf63509f5b590c18e0_5051	935e3caf510be0c503c97acef35381b2_4591	36ade0437952544bcc39850c777ef069_5232	S_aureus_9_00496
WP_000714374.1		hypothetical protein	4	4	1	6	2499				482	482	482	e26b52046ef139bf63509f5b590c18e0_83	935e3caf510be0c503c97acef35381b2_4023	36ade0437952544bcc39850c777ef069_99	S_aureus_9_00991
[truncated: 1,329 more rows]

## Sheet: Column Info
Column	Column Name	Description
[truncated: 14 more rows]
