# Supplementary material for: Comparative De Novo and Pan-Genome Analysis of MDR Nosocomial Bacteria Isolated from Hospitals in Jeddah, Saudi Arabia
Source: MDPI journal article supplement (doi:10.3390/microorganisms11102432), 2023-09-28
Supplement: s1 [file Table S6 S. auerus gene_presence_absence.xls]

## Sheet: Gene Presence Absence
Gene	Non-unique Gene name	Annotation	No. isolates	No. sequences	Avg sequences per isolate	Genome Fragment	Order within Fragment	Accessory Fragment	Accessory Order with Fragment	QC	Min group size nuc	Max group size nuc	Avg group size nuc	CP047021.1	CP049374.1	CP062376.1	S_aureus_10
group_1		IS1182 family transposase ISSau3	4	9	2.25	1	818				350	869	476	0c5d6aed1d23427ac77815eabcecea75_495 0c5d6aed1d23427ac77815eabcecea75_2722	c4610aa9a2d5bacd833356b3605d9b21_491 c4610aa9a2d5bacd833356b3605d9b21_2714	f0f6386fb62ec3a09e34ad652cf53efb_3492 f0f6386fb62ec3a09e34ad652cf53efb_1259	S_aureus_10_00917 S_aureus_10_01515 S_aureus_10_02622
sdrC		MSCRAMM family adhesin SdrC	4	4	1	1	2161				2981	3131	3054	0c5d6aed1d23427ac77815eabcecea75_1119	c4610aa9a2d5bacd833356b3605d9b21_1113	f0f6386fb62ec3a09e34ad652cf53efb_2864	S_aureus_10_00729
WP_240017429.1		prolyl oligopeptidase family serine peptidase	4	4	1	1	1379				746	770	752	0c5d6aed1d23427ac77815eabcecea75_3474	c4610aa9a2d5bacd833356b3605d9b21_3467	f0f6386fb62ec3a09e34ad652cf53efb_503	S_aureus_10_02045
sasF		cell-wall-anchored protein SasF	4	4	1	1	513				1907	1907	1907	0c5d6aed1d23427ac77815eabcecea75_5515	c4610aa9a2d5bacd833356b3605d9b21_5512	f0f6386fb62ec3a09e34ad652cf53efb_4084	S_aureus_10_01219
WP_017804596.1		sugar ABC transporter permease	4	4	1	1	755				839	839	839	0c5d6aed1d23427ac77815eabcecea75_373	c4610aa9a2d5bacd833356b3605d9b21_369	f0f6386fb62ec3a09e34ad652cf53efb_3620	S_aureus_10_00973
mazE		type II toxin-antitoxin system antitoxin MazE	4	4	1	1	1695				170	170	170	0c5d6aed1d23427ac77815eabcecea75_4298	c4610aa9a2d5bacd833356b3605d9b21_4297	f0f6386fb62ec3a09e34ad652cf53efb_5303	S_aureus_10_02270
WP_045176847.1		GAF domain-containing sensor histidine kinase	4	4	1	1	1529				1112	1112	1112	0c5d6aed1d23427ac77815eabcecea75_3754	c4610aa9a2d5bacd833356b3605d9b21_3753	f0f6386fb62ec3a09e34ad652cf53efb_353	S_aureus_10_02439
WP_000966288.1		membrane protein	4	4	1	1	1447				524	524	524	0c5d6aed1d23427ac77815eabcecea75_4017	c4610aa9a2d5bacd833356b3605d9b21_4018	f0f6386fb62ec3a09e34ad652cf53efb_87	S_aureus_10_02130
WP_000066020.1		DUF1270 domain-containing protein	4	4	1	1	1630				161	161	161	0c5d6aed1d23427ac77815eabcecea75_4153	c4610aa9a2d5bacd833356b3605d9b21_4152	f0f6386fb62ec3a09e34ad652cf53efb_5448	S_aureus_10_02289
spoVG		septation regulator SpoVG	4	4	1	1	84				302	302	302	0c5d6aed1d23427ac77815eabcecea75_938	c4610aa9a2d5bacd833356b3605d9b21_932	f0f6386fb62ec3a09e34ad652cf53efb_3045	S_aureus_10_02561
clpX		ATP-dependent Clp protease ATP-binding subunit ClpX	4	4	1	1	1260				1262	1262	1262	0c5d6aed1d23427ac77815eabcecea75_3228	c4610aa9a2d5bacd833356b3605d9b21_3222	f0f6386fb62ec3a09e34ad652cf53efb_749	S_aureus_10_01756
WP_001001019.1		LrgB family protein	4	4	1	1	403				689	689	689	0c5d6aed1d23427ac77815eabcecea75_5287	c4610aa9a2d5bacd833356b3605d9b21_5284	f0f6386fb62ec3a09e34ad652cf53efb_4312	S_aureus_10_01323
accD		acetyl-CoA carboxylase, carboxyltransferase subunit beta	4	4	1	1	1287				857	857	857	0c5d6aed1d23427ac77815eabcecea75_3286	c4610aa9a2d5bacd833356b3605d9b21_3279	f0f6386fb62ec3a09e34ad652cf53efb_691	S_aureus_10_01960
WP_072384923.1		DUF4909 domain-containing protein	4	4	1	1	1384				455	482	461	0c5d6aed1d23427ac77815eabcecea75_3484	c4610aa9a2d5bacd833356b3605d9b21_3477	f0f6386fb62ec3a09e34ad652cf53efb_493	S_aureus_10_02050
WP_045176646.1		polysaccharide biosynthesis protein	4	4	1	1	77				1526	1526	1526	0c5d6aed1d23427ac77815eabcecea75_952	c4610aa9a2d5bacd833356b3605d9b21_946	f0f6386fb62ec3a09e34ad652cf53efb_3031	S_aureus_10_02555
WP_045178149.1		glycerate kinase	4	4	1	1	2339				1124	1124	1124	0c5d6aed1d23427ac77815eabcecea75_1491	c4610aa9a2d5bacd833356b3605d9b21_1479	f0f6386fb62ec3a09e34ad652cf53efb_2492	S_aureus_10_00552
ytxJ		bacillithiol system redox-active protein YtxJ	4	4	1	1	2338				320	320	320	0c5d6aed1d23427ac77815eabcecea75_1489	c4610aa9a2d5bacd833356b3605d9b21_1477	f0f6386fb62ec3a09e34ad652cf53efb_2494	S_aureus_10_00553
WP_001148337.1		phage antirepressor KilAC domain-containing protein	4	4	1	1	1635				749	749	749	0c5d6aed1d23427ac77815eabcecea75_4163	c4610aa9a2d5bacd833356b3605d9b21_4162	f0f6386fb62ec3a09e34ad652cf53efb_5438	S_aureus_10_02294
pdxS		pyridoxal 5'-phosphate synthase lyase subunit PdxS	4	4	1	1	61				887	887	887	0c5d6aed1d23427ac77815eabcecea75_1032	c4610aa9a2d5bacd833356b3605d9b21_1026	f0f6386fb62ec3a09e34ad652cf53efb_2951	S_aureus_10_00772
rplS		50S ribosomal protein L19	4	4	1	1	2133				350	350	350	0c5d6aed1d23427ac77815eabcecea75_2331	c4610aa9a2d5bacd833356b3605d9b21_2318	f0f6386fb62ec3a09e34ad652cf53efb_1650	S_aureus_10_00154
rnmV		ribonuclease M5	4	4	1	1	90				536	536	536	0c5d6aed1d23427ac77815eabcecea75_926	c4610aa9a2d5bacd833356b3605d9b21_920	f0f6386fb62ec3a09e34ad652cf53efb_3057	S_aureus_10_02567
WP_045177965.1		GNAT family N-acetyltransferase	4	4	1	1	2276				542	542	542	0c5d6aed1d23427ac77815eabcecea75_1359	c4610aa9a2d5bacd833356b3605d9b21_1349	f0f6386fb62ec3a09e34ad652cf53efb_2624	S_aureus_10_00614
WP_001125614.1		amidase domain-containing protein	4	4	1	1	511				1859	1859	1859	0c5d6aed1d23427ac77815eabcecea75_5511	c4610aa9a2d5bacd833356b3605d9b21_5508	f0f6386fb62ec3a09e34ad652cf53efb_4088	S_aureus_10_01221
WP_000338527.1		hypothetical protein	4	4	1	1	1622				218	218	218	0c5d6aed1d23427ac77815eabcecea75_4137	c4610aa9a2d5bacd833356b3605d9b21_4136	f0f6386fb62ec3a09e34ad652cf53efb_5464	S_aureus_10_02281
WP_072384920.1		excalibur calcium-binding domain-containing protein	4	4	1	1	1385				614	650	641	0c5d6aed1d23427ac77815eabcecea75_3486	c4610aa9a2d5bacd833356b3605d9b21_3479	f0f6386fb62ec3a09e34ad652cf53efb_491	S_aureus_10_02051
ugpC		sn-glycerol-3-phosphate ABC transporter ATP-binding protein UgpC	4	4	1	1	752				1097	1097	1097	0c5d6aed1d23427ac77815eabcecea75_367	c4610aa9a2d5bacd833356b3605d9b21_363	f0f6386fb62ec3a09e34ad652cf53efb_3626	S_aureus_10_00976
dinB		DNA polymerase IV	4	4	1	1	1482				1070	1070	1070	0c5d6aed1d23427ac77815eabcecea75_3943	c4610aa9a2d5bacd833356b3605d9b21_3942	f0f6386fb62ec3a09e34ad652cf53efb_161	S_aureus_10_02097
WP_045177520.1		NAD(P)H-dependent oxidoreductase	4	4	1	1	309				566	566	566	0c5d6aed1d23427ac77815eabcecea75_637	c4610aa9a2d5bacd833356b3605d9b21_631	f0f6386fb62ec3a09e34ad652cf53efb_3346	S_aureus_10_00848
WP_001566877.1		isochorismatase family protein	4	4	1	1	731				557	557	557	0c5d6aed1d23427ac77815eabcecea75_325	c4610aa9a2d5bacd833356b3605d9b21_321	f0f6386fb62ec3a09e34ad652cf53efb_3668	S_aureus_10_00996
lacD		tagatose-bisphosphate aldolase	4	4	1	1	1813				980	980	980	0c5d6aed1d23427ac77815eabcecea75_4570	c4610aa9a2d5bacd833356b3605d9b21_4569	f0f6386fb62ec3a09e34ad652cf53efb_5027	S_aureus_10_01796
treR		trehalose operon repressor	4	4	1	1	108				728	728	728	0c5d6aed1d23427ac77815eabcecea75_878	c4610aa9a2d5bacd833356b3605d9b21_872	f0f6386fb62ec3a09e34ad652cf53efb_3105	S_aureus_10_02496
gltS		sodium/glutamate symporter	4	4	1	1	1958				1208	1208	1208	0c5d6aed1d23427ac77815eabcecea75_4871	c4610aa9a2d5bacd833356b3605d9b21_4866	f0f6386fb62ec3a09e34ad652cf53efb_4726	S_aureus_10_01934
WP_045177170.1		asparaginase	4	4	1	1	261				968	968	968	0c5d6aed1d23427ac77815eabcecea75_2843	c4610aa9a2d5bacd833356b3605d9b21_2837	f0f6386fb62ec3a09e34ad652cf53efb_1138	S_aureus_10_01573
cap8F		type 8 capsular polysaccharide synthesis protein Cap8F	4	4	1	1	699				1109	1109	1109	0c5d6aed1d23427ac77815eabcecea75_261	c4610aa9a2d5bacd833356b3605d9b21_257	f0f6386fb62ec3a09e34ad652cf53efb_3732	S_aureus_10_01028
WP_043044767.1		low temperature requirement protein A	4	4	1	1	212				1133	1133	1133	0c5d6aed1d23427ac77815eabcecea75_665	c4610aa9a2d5bacd833356b3605d9b21_659	f0f6386fb62ec3a09e34ad652cf53efb_3318	S_aureus_10_00834
WP_001037045.1		DUF1433 domain-containing protein	4	4	1	1	1398				359	377	372	0c5d6aed1d23427ac77815eabcecea75_3512	c4610aa9a2d5bacd833356b3605d9b21_3505	f0f6386fb62ec3a09e34ad652cf53efb_467	S_aureus_10_02060
WP_001108346.1		bifunctional folylpolyglutamate synthase/dihydrofolate synthase	4	4	1	1	1249				1271	1271	1271	0c5d6aed1d23427ac77815eabcecea75_3203	c4610aa9a2d5bacd833356b3605d9b21_3197	f0f6386fb62ec3a09e34ad652cf53efb_774	S_aureus_10_01745
WP_025174343.1		NAD-dependent protein deacylase	4	4	1	1	1818				740	740	740	0c5d6aed1d23427ac77815eabcecea75_4580	c4610aa9a2d5bacd833356b3605d9b21_4579	f0f6386fb62ec3a09e34ad652cf53efb_5017	S_aureus_10_01801
hisB		imidazoleglycerol-phosphate dehydratase HisB	4	4	1	1	542				578	578	578	0c5d6aed1d23427ac77815eabcecea75_5573	c4610aa9a2d5bacd833356b3605d9b21_5572	f0f6386fb62ec3a09e34ad652cf53efb_4026	S_aureus_10_01190
WP_031783378.1		helix-turn-helix domain-containing protein	4	4	1	1	1639				770	770	770	0c5d6aed1d23427ac77815eabcecea75_4171	c4610aa9a2d5bacd833356b3605d9b21_4170	f0f6386fb62ec3a09e34ad652cf53efb_5430	S_aureus_10_02298
WP_000749383.1		CHAP domain-containing protein	4	4	1	1	2355				839	839	839	0c5d6aed1d23427ac77815eabcecea75_1522	c4610aa9a2d5bacd833356b3605d9b21_1510	f0f6386fb62ec3a09e34ad652cf53efb_2461	S_aureus_10_00539
WP_000798967.1		DUF1450 domain-containing protein	4	4	1	1	2191				341	341	341	0c5d6aed1d23427ac77815eabcecea75_1181	c4610aa9a2d5bacd833356b3605d9b21_1175	f0f6386fb62ec3a09e34ad652cf53efb_2802	S_aureus_10_00698
WP_045177934.1		diacylglycerol kinase family lipid kinase	4	4	1	1	2322				917	917	917	0c5d6aed1d23427ac77815eabcecea75_1453	c4610aa9a2d5bacd833356b3605d9b21_1443	f0f6386fb62ec3a09e34ad652cf53efb_2530	S_aureus_10_00568
argS		arginine--tRNA ligase	4	4	1	1	2208				1661	1661	1661	0c5d6aed1d23427ac77815eabcecea75_1217	c4610aa9a2d5bacd833356b3605d9b21_1211	f0f6386fb62ec3a09e34ad652cf53efb_2766	S_aureus_10_00683
yhbY		ribosome assembly RNA-binding protein YhbY	4	4	1	1	1191				290	290	290	0c5d6aed1d23427ac77815eabcecea75_3079	c4610aa9a2d5bacd833356b3605d9b21_3073	f0f6386fb62ec3a09e34ad652cf53efb_898	S_aureus_10_01687
WP_000966695.1		YnfA family protein	4	4	1	1	1952				326	326	326	0c5d6aed1d23427ac77815eabcecea75_4859	c4610aa9a2d5bacd833356b3605d9b21_4854	f0f6386fb62ec3a09e34ad652cf53efb_4738	S_aureus_10_01929
WP_000072624.1		restriction endonuclease subunit S	4	4	1	1	1400				578	1199	1043	0c5d6aed1d23427ac77815eabcecea75_3516	c4610aa9a2d5bacd833356b3605d9b21_3509	f0f6386fb62ec3a09e34ad652cf53efb_463	S_aureus_10_02062
WP_000011687.1		sterile alpha motif-like domain-containing protein	4	4	1	1	406				218	218	218	0c5d6aed1d23427ac77815eabcecea75_5293	c4610aa9a2d5bacd833356b3605d9b21_5290	f0f6386fb62ec3a09e34ad652cf53efb_4306	S_aureus_10_01320
phnC		phosphonate ABC transporter ATP-binding protein	4	4	1	1	687				773	773	773	0c5d6aed1d23427ac77815eabcecea75_237	c4610aa9a2d5bacd833356b3605d9b21_233	f0f6386fb62ec3a09e34ad652cf53efb_3756	S_aureus_10_01040
WP_000141109.1		lipoate--protein ligase family protein	4	4	1	1	1129				830	830	830	0c5d6aed1d23427ac77815eabcecea75_2954	c4610aa9a2d5bacd833356b3605d9b21_2948	f0f6386fb62ec3a09e34ad652cf53efb_1023	S_aureus_10_01627
WP_001251935.1		hypothetical protein	4	4	1	1	1792				260	260	260	0c5d6aed1d23427ac77815eabcecea75_4530	c4610aa9a2d5bacd833356b3605d9b21_4527	f0f6386fb62ec3a09e34ad652cf53efb_5071	S_aureus_10_01776
WP_000872486.1		D-ribitol-5-phosphate cytidylyltransferase	4	4	1	1	793				716	716	716	0c5d6aed1d23427ac77815eabcecea75_455	c4610aa9a2d5bacd833356b3605d9b21_451	f0f6386fb62ec3a09e34ad652cf53efb_3532	S_aureus_10_00935
WP_031783377.1		AAA family ATPase	4	4	1	1	1627				1943	1943	1943	0c5d6aed1d23427ac77815eabcecea75_4147	c4610aa9a2d5bacd833356b3605d9b21_4146	f0f6386fb62ec3a09e34ad652cf53efb_5454	S_aureus_10_02286
WP_001015121.1		shikimate kinase	4	4	1	1	1134				524	524	524	0c5d6aed1d23427ac77815eabcecea75_2965	c4610aa9a2d5bacd833356b3605d9b21_2959	f0f6386fb62ec3a09e34ad652cf53efb_1012	S_aureus_10_01632
sarS		HTH-type transcriptional regulator SarS	4	4	1	1	657				752	752	752	0c5d6aed1d23427ac77815eabcecea75_175	c4610aa9a2d5bacd833356b3605d9b21_173	f0f6386fb62ec3a09e34ad652cf53efb_3818	S_aureus_10_01070
purB		adenylosuccinate lyase	4	4	1	1	1469				1295	1295	1295	0c5d6aed1d23427ac77815eabcecea75_3971	c4610aa9a2d5bacd833356b3605d9b21_3970	f0f6386fb62ec3a09e34ad652cf53efb_133	S_aureus_10_02110
rsmD		16S rRNA (guanine(966)-N(2))-methyltransferase RsmD	4	4	1	1	2631				542	542	542	0c5d6aed1d23427ac77815eabcecea75_2088	c4610aa9a2d5bacd833356b3605d9b21_2077	f0f6386fb62ec3a09e34ad652cf53efb_1897	S_aureus_10_00270
WP_000655864.1		ribose 5-phosphate isomerase A	4	4	1	1	1949				686	686	686	0c5d6aed1d23427ac77815eabcecea75_4853	c4610aa9a2d5bacd833356b3605d9b21_4848	f0f6386fb62ec3a09e34ad652cf53efb_4744	S_aureus_10_01926
WP_000888494.1		protein-serine/threonine phosphatase Stp1	4	4	1	1	2724				743	743	743	0c5d6aed1d23427ac77815eabcecea75_2287	c4610aa9a2d5bacd833356b3605d9b21_2274	f0f6386fb62ec3a09e34ad652cf53efb_1694	S_aureus_10_00176
WP_001039519.1		deoxynucleoside kinase	4	4	1	1	2157				617	617	617	0c5d6aed1d23427ac77815eabcecea75_1111	c4610aa9a2d5bacd833356b3605d9b21_1105	f0f6386fb62ec3a09e34ad652cf53efb_2872	S_aureus_10_00733
betA		choline dehydrogenase	4	4	1	1	471				1709	1709	1709	0c5d6aed1d23427ac77815eabcecea75_5427	c4610aa9a2d5bacd833356b3605d9b21_5424	f0f6386fb62ec3a09e34ad652cf53efb_4172	S_aureus_10_01256
yihA		ribosome biogenesis GTP-binding protein YihA/YsxC	4	4	1	1	1259				590	590	590	0c5d6aed1d23427ac77815eabcecea75_3226	c4610aa9a2d5bacd833356b3605d9b21_3220	f0f6386fb62ec3a09e34ad652cf53efb_751	S_aureus_10_01755
purF		amidophosphoribosyltransferase	4	4	1	1	2577				1484	1484	1484	0c5d6aed1d23427ac77815eabcecea75_1981	c4610aa9a2d5bacd833356b3605d9b21_1968	f0f6386fb62ec3a09e34ad652cf53efb_2004	S_aureus_10_00322
WP_000477931.1		ABC transporter permease	4	4	1	1	341				1049	1049	1049	0c5d6aed1d23427ac77815eabcecea75_571	c4610aa9a2d5bacd833356b3605d9b21_565	f0f6386fb62ec3a09e34ad652cf53efb_3412	S_aureus_10_00879
WP_000682646.1		tRNA threonylcarbamoyladenosine dehydratase	4	4	1	1	1222				773	773	773	0c5d6aed1d23427ac77815eabcecea75_3143	c4610aa9a2d5bacd833356b3605d9b21_3137	f0f6386fb62ec3a09e34ad652cf53efb_834	S_aureus_10_01720
WP_000384523.1		DUF1146 family protein	4	4	1	1	1726				233	233	233	0c5d6aed1d23427ac77815eabcecea75_4361	c4610aa9a2d5bacd833356b3605d9b21_4360	f0f6386fb62ec3a09e34ad652cf53efb_5240	S_aureus_10_02240
WP_000894464.1		metal ABC transporter ATP-binding protein	4	4	1	1	2230				743	743	743	0c5d6aed1d23427ac77815eabcecea75_1265	c4610aa9a2d5bacd833356b3605d9b21_1255	f0f6386fb62ec3a09e34ad652cf53efb_2718	S_aureus_10_00659
WP_000154465.1		hypothetical protein	4	4	1	1	2289				284	284	284	0c5d6aed1d23427ac77815eabcecea75_1385	c4610aa9a2d5bacd833356b3605d9b21_1375	f0f6386fb62ec3a09e34ad652cf53efb_2598	S_aureus_10_00601
WP_001279338.1		trypsin-like peptidase domain-containing protein	4	4	1	1	1315				1274	1274	1274	0c5d6aed1d23427ac77815eabcecea75_3344	c4610aa9a2d5bacd833356b3605d9b21_3337	f0f6386fb62ec3a09e34ad652cf53efb_633	S_aureus_10_01986
narH		nitrate reductase subunit beta	4	4	1	1	999				1559	1559	1559	0c5d6aed1d23427ac77815eabcecea75_4977	c4610aa9a2d5bacd833356b3605d9b21_4974	f0f6386fb62ec3a09e34ad652cf53efb_4620	S_aureus_10_01466
WP_000985290.1		peptide deformylase	4	4	1	1	2720				488	488	488	0c5d6aed1d23427ac77815eabcecea75_2279	c4610aa9a2d5bacd833356b3605d9b21_2266	f0f6386fb62ec3a09e34ad652cf53efb_1702	S_aureus_10_00180
mnhD1		Na+/H+ antiporter Mnh1 subunit D	4	4	1	1	2455				1496	1496	1496	0c5d6aed1d23427ac77815eabcecea75_1728	c4610aa9a2d5bacd833356b3605d9b21_1716	f0f6386fb62ec3a09e34ad652cf53efb_2257	S_aureus_10_00440
WP_000073195.1		MurR/RpiR family transcriptional regulator	4	4	1	1	1929				872	872	872	0c5d6aed1d23427ac77815eabcecea75_4810	c4610aa9a2d5bacd833356b3605d9b21_4805	f0f6386fb62ec3a09e34ad652cf53efb_4787	S_aureus_10_01906
purL		phosphoribosylformylglycinamidine synthase subunit PurL	4	4	1	1	2576				2189	2189	2189	0c5d6aed1d23427ac77815eabcecea75_1979	c4610aa9a2d5bacd833356b3605d9b21_1966	f0f6386fb62ec3a09e34ad652cf53efb_2006	S_aureus_10_00323
mraY		phospho-N-acetylmuramoyl-pentapeptide-transferase	4	4	1	1	2689				965	965	965	0c5d6aed1d23427ac77815eabcecea75_2213	c4610aa9a2d5bacd833356b3605d9b21_2202	f0f6386fb62ec3a09e34ad652cf53efb_1768	S_aureus_10_00213
WP_045177561.1		hypothetical protein	4	4	1	1	179				944	944	944	0c5d6aed1d23427ac77815eabcecea75_730	c4610aa9a2d5bacd833356b3605d9b21_726	f0f6386fb62ec3a09e34ad652cf53efb_3253	S_aureus_10_00804
WP_000588530.1		NUDIX domain-containing protein	4	4	1	1	117				395	395	395	0c5d6aed1d23427ac77815eabcecea75_857	c4610aa9a2d5bacd833356b3605d9b21_851	f0f6386fb62ec3a09e34ad652cf53efb_3126	S_aureus_10_02506
WP_001012736.1		BglG family transcription antiterminator	4	4	1	1	782				2096	2096	2096	0c5d6aed1d23427ac77815eabcecea75_433	c4610aa9a2d5bacd833356b3605d9b21_429	f0f6386fb62ec3a09e34ad652cf53efb_3554	S_aureus_10_00946
sceD		lytic transglycosylase SceD	4	4	1	1	1721				695	695	695	0c5d6aed1d23427ac77815eabcecea75_4351	c4610aa9a2d5bacd833356b3605d9b21_4350	f0f6386fb62ec3a09e34ad652cf53efb_5250	S_aureus_10_02245
rocF		arginase	4	4	1	1	1784				908	908	908	0c5d6aed1d23427ac77815eabcecea75_4485	c4610aa9a2d5bacd833356b3605d9b21_4482	f0f6386fb62ec3a09e34ad652cf53efb_5116	S_aureus_10_02182
pyrE		orotate phosphoribosyltransferase	4	4	1	1	2710				611	611	611	0c5d6aed1d23427ac77815eabcecea75_2259	c4610aa9a2d5bacd833356b3605d9b21_2246	f0f6386fb62ec3a09e34ad652cf53efb_1722	S_aureus_10_00190
WP_000145504.1		DUF4064 domain-containing protein	4	4	1	1	2611				1019	1019	1019	0c5d6aed1d23427ac77815eabcecea75_2048	c4610aa9a2d5bacd833356b3605d9b21_2037	f0f6386fb62ec3a09e34ad652cf53efb_1937	S_aureus_10_00289
WP_000765183.1		DUF423 domain-containing protein	4	4	1	1	2182				368	368	368	0c5d6aed1d23427ac77815eabcecea75_1161	c4610aa9a2d5bacd833356b3605d9b21_1155	f0f6386fb62ec3a09e34ad652cf53efb_2822	S_aureus_10_00708
WP_000831218.1		SMEK domain-containing protein	4	4	1	1	1399				4112	4112	4112	0c5d6aed1d23427ac77815eabcecea75_3514	c4610aa9a2d5bacd833356b3605d9b21_3507	f0f6386fb62ec3a09e34ad652cf53efb_465	S_aureus_10_02061
WP_000406191.1		nucleoside triphosphate pyrophosphohydrolase family protein	4	4	1	1	1083				452	452	452	0c5d6aed1d23427ac77815eabcecea75_4107	c4610aa9a2d5bacd833356b3605d9b21_4106	f0f6386fb62ec3a09e34ad652cf53efb_5494	S_aureus_10_02168
WP_045177690.1		MFS transporter	4	4	1	1	939				1187	1187	1187	0c5d6aed1d23427ac77815eabcecea75_5103	c4610aa9a2d5bacd833356b3605d9b21_5098	f0f6386fb62ec3a09e34ad652cf53efb_4494	S_aureus_10_01410
WP_001031409.1		fructose bisphosphate aldolase	4	4	1	1	466				890	890	890	0c5d6aed1d23427ac77815eabcecea75_5415	c4610aa9a2d5bacd833356b3605d9b21_5412	f0f6386fb62ec3a09e34ad652cf53efb_4184	S_aureus_10_01261
WP_001262621.1		hypothetical protein	4	4	1	1	1063				287	287	287	0c5d6aed1d23427ac77815eabcecea75_4067	c4610aa9a2d5bacd833356b3605d9b21_4066	f0f6386fb62ec3a09e34ad652cf53efb_37	S_aureus_10_02149
clpL		ATP-dependent Clp protease ATP-binding subunit ClpL	4	4	1	1	411				2105	2105	2105	0c5d6aed1d23427ac77815eabcecea75_5303	c4610aa9a2d5bacd833356b3605d9b21_5300	f0f6386fb62ec3a09e34ad652cf53efb_4296	S_aureus_10_01315
rplQ		50S ribosomal protein L17	4	4	1	1	1835				368	368	368	0c5d6aed1d23427ac77815eabcecea75_4620	c4610aa9a2d5bacd833356b3605d9b21_4615	f0f6386fb62ec3a09e34ad652cf53efb_4977	S_aureus_10_01816
WP_000275730.1		pectate lyase	4	4	1	1	1458				1097	1097	1097	0c5d6aed1d23427ac77815eabcecea75_3993	c4610aa9a2d5bacd833356b3605d9b21_3992	f0f6386fb62ec3a09e34ad652cf53efb_111	S_aureus_10_02120
WP_000022323.1		biotin-dependent carboxyltransferase family protein	4	4	1	1	2315				1004	1004	1004	0c5d6aed1d23427ac77815eabcecea75_1437	c4610aa9a2d5bacd833356b3605d9b21_1427	f0f6386fb62ec3a09e34ad652cf53efb_2546	S_aureus_10_00576
group_1085	rpmG	50S ribosomal protein L33	4	4	1	1	2028				149	149	149	0c5d6aed1d23427ac77815eabcecea75_2541	c4610aa9a2d5bacd833356b3605d9b21_2534	f0f6386fb62ec3a09e34ad652cf53efb_1438	S_aureus_10_00052
WP_000119691.1		metalloregulator ArsR/SmtB family transcription factor	4	4	1	2	11				347	347	347	0c5d6aed1d23427ac77815eabcecea75_5654	c4610aa9a2d5bacd833356b3605d9b21_5651	f0f6386fb62ec3a09e34ad652cf53efb_5507	S_aureus_10_02595
WP_001067262.1		deoxynucleoside kinase	4	4	1	1	2156				662	662	662	0c5d6aed1d23427ac77815eabcecea75_1109	c4610aa9a2d5bacd833356b3605d9b21_1103	f0f6386fb62ec3a09e34ad652cf53efb_2874	S_aureus_10_00734
WP_001180280.1		ABC transporter permease	4	4	1	1	2500				881	881	881	0c5d6aed1d23427ac77815eabcecea75_1818	c4610aa9a2d5bacd833356b3605d9b21_1806	f0f6386fb62ec3a09e34ad652cf53efb_2167	S_aureus_10_00395
WP_000021870.1		TrkH family potassium uptake protein	4	4	1	1	2527				1358	1358	1358	0c5d6aed1d23427ac77815eabcecea75_1873	c4610aa9a2d5bacd833356b3605d9b21_1860	f0f6386fb62ec3a09e34ad652cf53efb_2112	S_aureus_10_00368
WP_000131381.1		hypothetical protein	4	6	1.5	1	1620				242	242	242	0c5d6aed1d23427ac77815eabcecea75_3644 0c5d6aed1d23427ac77815eabcecea75_4131	c4610aa9a2d5bacd833356b3605d9b21_3639 c4610aa9a2d5bacd833356b3605d9b21_4130	f0f6386fb62ec3a09e34ad652cf53efb_5470	S_aureus_10_02489
WP_045177839.1		replication initiation and membrane attachment family protein	4	4	1	1	1272				1400	1400	1400	0c5d6aed1d23427ac77815eabcecea75_3254	c4610aa9a2d5bacd833356b3605d9b21_3247	f0f6386fb62ec3a09e34ad652cf53efb_723	S_aureus_10_01766
WP_000291488.1		DUF1108 family protein	4	4	1	1	1629				260	260	260	0c5d6aed1d23427ac77815eabcecea75_4151	c4610aa9a2d5bacd833356b3605d9b21_4150	f0f6386fb62ec3a09e34ad652cf53efb_5450	S_aureus_10_02288
msrB		peptide-methionine (R)-S-oxide reductase MsrB	4	4	1	1	814				428	428	428	0c5d6aed1d23427ac77815eabcecea75_2730	c4610aa9a2d5bacd833356b3605d9b21_2722	f0f6386fb62ec3a09e34ad652cf53efb_1251	S_aureus_10_01519
mnhA1		Na+/H+ antiporter Mnh1 subunit A	4	4	1	1	2458				2405	2405	2405	0c5d6aed1d23427ac77815eabcecea75_1734	c4610aa9a2d5bacd833356b3605d9b21_1722	f0f6386fb62ec3a09e34ad652cf53efb_2251	S_aureus_10_00437
WP_006191049.1		AbgT family transporter	4	4	1	1	920				1538	1538	1538	0c5d6aed1d23427ac77815eabcecea75_5143	c4610aa9a2d5bacd833356b3605d9b21_5138	f0f6386fb62ec3a09e34ad652cf53efb_4454	S_aureus_10_01390
WP_001123303.1		thiol-disulfide oxidoreductase DCC family protein	4	4	1	1	1765				413	413	413	0c5d6aed1d23427ac77815eabcecea75_4441	c4610aa9a2d5bacd833356b3605d9b21_4440	f0f6386fb62ec3a09e34ad652cf53efb_5160	S_aureus_10_02201
WP_045178121.1		hypothetical protein	4	4	1	1	2396				569	569	569	0c5d6aed1d23427ac77815eabcecea75_1609	c4610aa9a2d5bacd833356b3605d9b21_1595	f0f6386fb62ec3a09e34ad652cf53efb_2376	S_aureus_10_00498
WP_000052076.1		hypothetical protein	4	4	1	1	2397				188	188	188	0c5d6aed1d23427ac77815eabcecea75_1611	c4610aa9a2d5bacd833356b3605d9b21_1597	f0f6386fb62ec3a09e34ad652cf53efb_2374	S_aureus_10_00497
hisG		ATP phosphoribosyltransferase	4	4	1	1	545				614	614	614	0c5d6aed1d23427ac77815eabcecea75_5579	c4610aa9a2d5bacd833356b3605d9b21_5578	f0f6386fb62ec3a09e34ad652cf53efb_4020	S_aureus_10_01187
WP_000354184.1		VOC family protein	4	4	1	1	2712				401	401	401	0c5d6aed1d23427ac77815eabcecea75_2263	c4610aa9a2d5bacd833356b3605d9b21_2250	f0f6386fb62ec3a09e34ad652cf53efb_1718	S_aureus_10_00188
mnhC2		Na+/H+ antiporter Mnh2 subunit C	4	7	1.75	1	2224				344	1829	1049	0c5d6aed1d23427ac77815eabcecea75_1249 0c5d6aed1d23427ac77815eabcecea75_1251	c4610aa9a2d5bacd833356b3605d9b21_1243	f0f6386fb62ec3a09e34ad652cf53efb_2734 f0f6386fb62ec3a09e34ad652cf53efb_2732	S_aureus_10_00667 S_aureus_10_00666
WP_000037079.1		YihY/virulence factor BrkB family protein	4	4	1	1	1496				1217	1217	1217	0c5d6aed1d23427ac77815eabcecea75_3915	c4610aa9a2d5bacd833356b3605d9b21_3914	f0f6386fb62ec3a09e34ad652cf53efb_189	S_aureus_10_02085
coaD		pantetheine-phosphate adenylyltransferase	4	4	1	1	2632				482	482	482	0c5d6aed1d23427ac77815eabcecea75_2090	c4610aa9a2d5bacd833356b3605d9b21_2079	f0f6386fb62ec3a09e34ad652cf53efb_1895	S_aureus_10_00269
cap8J		type 8 capsular polysaccharide synthesis protein Cap8J	4	4	1	1	703				557	557	557	0c5d6aed1d23427ac77815eabcecea75_269	c4610aa9a2d5bacd833356b3605d9b21_265	f0f6386fb62ec3a09e34ad652cf53efb_3724	S_aureus_10_01024
nrdI		class Ib ribonucleoside-diphosphate reductase assembly flavoprotein NrdI	4	4	1	1	2327				398	398	398	0c5d6aed1d23427ac77815eabcecea75_1465	c4610aa9a2d5bacd833356b3605d9b21_1453	f0f6386fb62ec3a09e34ad652cf53efb_2518	S_aureus_10_00564
WP_000684567.1		NAD/NADP-dependent octopine/nopaline dehydrogenase family protein	4	4	1	1	1914				1082	1082	1082	0c5d6aed1d23427ac77815eabcecea75_4780	c4610aa9a2d5bacd833356b3605d9b21_4775	f0f6386fb62ec3a09e34ad652cf53efb_4817	S_aureus_10_01892
group_1105	phnE	phosphonate ABC transporter, permease protein PhnE	4	4	1	1	685				815	815	815	0c5d6aed1d23427ac77815eabcecea75_233	c4610aa9a2d5bacd833356b3605d9b21_229	f0f6386fb62ec3a09e34ad652cf53efb_3760	S_aureus_10_01042
WP_000739531.1		superantigen-like protein SSL14	4	4	1	1	2673				725	725	725	0c5d6aed1d23427ac77815eabcecea75_2178	c4610aa9a2d5bacd833356b3605d9b21_2167	f0f6386fb62ec3a09e34ad652cf53efb_1807	S_aureus_10_00230
WP_000616225.1		VOC family protein	4	4	1	1	437				377	377	377	0c5d6aed1d23427ac77815eabcecea75_5357	c4610aa9a2d5bacd833356b3605d9b21_5354	f0f6386fb62ec3a09e34ad652cf53efb_4242	S_aureus_10_01290
ychF		redox-regulated ATPase YchF	4	4	1	1	202				1097	1097	1097	0c5d6aed1d23427ac77815eabcecea75_686	c4610aa9a2d5bacd833356b3605d9b21_680	f0f6386fb62ec3a09e34ad652cf53efb_3297	S_aureus_10_00824
WP_045177497.1		sodium:solute symporter	4	4	1	1	334				1532	1532	1532	0c5d6aed1d23427ac77815eabcecea75_585	c4610aa9a2d5bacd833356b3605d9b21_579	f0f6386fb62ec3a09e34ad652cf53efb_3398	S_aureus_10_00873
WP_001236371.1		aromatic acid exporter family protein	4	4	1	1	1514				1094	1145	1106	0c5d6aed1d23427ac77815eabcecea75_3877	c4610aa9a2d5bacd833356b3605d9b21_3876	f0f6386fb62ec3a09e34ad652cf53efb_227	S_aureus_10_02067
proC		pyrroline-5-carboxylate reductase	4	4	1	1	233				815	815	815	0c5d6aed1d23427ac77815eabcecea75_2894	c4610aa9a2d5bacd833356b3605d9b21_2888	f0f6386fb62ec3a09e34ad652cf53efb_1083	S_aureus_10_01598
WP_000442605.1		hypothetical protein	4	4	1	1	1069				446	446	446	0c5d6aed1d23427ac77815eabcecea75_4079	c4610aa9a2d5bacd833356b3605d9b21_4078	f0f6386fb62ec3a09e34ad652cf53efb_25	S_aureus_10_02154
WP_000426894.1		hypothetical protein	4	4	1	1	632				584	584	584	0c5d6aed1d23427ac77815eabcecea75_121	c4610aa9a2d5bacd833356b3605d9b21_119	f0f6386fb62ec3a09e34ad652cf53efb_3872	S_aureus_10_01095
lytM		glycine-glycine endopeptidase LytM	4	4	1	1	377				950	950	950	0c5d6aed1d23427ac77815eabcecea75_501	c4610aa9a2d5bacd833356b3605d9b21_497	f0f6386fb62ec3a09e34ad652cf53efb_3486	S_aureus_10_00914
WP_001129749.1		AraC family transcriptional regulator	4	4	1	1	2264				2150	2150	2150	0c5d6aed1d23427ac77815eabcecea75_1333	c4610aa9a2d5bacd833356b3605d9b21_1323	f0f6386fb62ec3a09e34ad652cf53efb_2650	S_aureus_10_00626
WP_000659674.1		Wzz/FepE/Etk N-terminal domain-containing protein	4	4	1	1	531				662	662	662	0c5d6aed1d23427ac77815eabcecea75_5551	c4610aa9a2d5bacd833356b3605d9b21_5548	f0f6386fb62ec3a09e34ad652cf53efb_4048	S_aureus_10_01201
WP_001025061.1		MFS transporter	4	4	1	1	1350				1181	1181	1181	0c5d6aed1d23427ac77815eabcecea75_3414	c4610aa9a2d5bacd833356b3605d9b21_3407	f0f6386fb62ec3a09e34ad652cf53efb_563	S_aureus_10_02017
folP		dihydropteroate synthase	4	4	1	1	67				803	803	803	0c5d6aed1d23427ac77815eabcecea75_972	c4610aa9a2d5bacd833356b3605d9b21_966	f0f6386fb62ec3a09e34ad652cf53efb_3011	S_aureus_10_02545
dtd		D-aminoacyl-tRNA deacylase	4	4	1	1	1226				452	452	452	0c5d6aed1d23427ac77815eabcecea75_3156	c4610aa9a2d5bacd833356b3605d9b21_3150	f0f6386fb62ec3a09e34ad652cf53efb_821	S_aureus_10_01724
dnaB		replicative DNA helicase	4	4	1	1	594				1400	1400	1400	0c5d6aed1d23427ac77815eabcecea75_35	c4610aa9a2d5bacd833356b3605d9b21_35	f0f6386fb62ec3a09e34ad652cf53efb_3922	S_aureus_10_01138
WP_000180460.1		DUF1128 family protein	4	4	1	1	1499				200	206	201	0c5d6aed1d23427ac77815eabcecea75_3909	c4610aa9a2d5bacd833356b3605d9b21_3908	f0f6386fb62ec3a09e34ad652cf53efb_195	S_aureus_10_02082
hslV		ATP-dependent protease subunit HslV	4	4	1	1	2121				545	545	545	0c5d6aed1d23427ac77815eabcecea75_2355	c4610aa9a2d5bacd833356b3605d9b21_2342	f0f6386fb62ec3a09e34ad652cf53efb_1626	S_aureus_10_00142
WP_001037438.1		hypothetical protein	4	4	1	1	2484				1118	1118	1118	0c5d6aed1d23427ac77815eabcecea75_1786	c4610aa9a2d5bacd833356b3605d9b21_1774	f0f6386fb62ec3a09e34ad652cf53efb_2199	S_aureus_10_00411
WP_000713729.1		bacteriocin-associated integral membrane family protein	4	4	1	2	20				1934	1934	1934	0c5d6aed1d23427ac77815eabcecea75_5674	c4610aa9a2d5bacd833356b3605d9b21_5675	f0f6386fb62ec3a09e34ad652cf53efb_5527	S_aureus_10_02586
WP_000275058.1		hypothetical protein	4	4	1	1	1632				632	632	632	0c5d6aed1d23427ac77815eabcecea75_4157	c4610aa9a2d5bacd833356b3605d9b21_4156	f0f6386fb62ec3a09e34ad652cf53efb_5444	S_aureus_10_02291
WP_000691942.1		NifU N-terminal domain-containing protein	4	4	1	1	17				251	251	251	0c5d6aed1d23427ac77815eabcecea75_2744	c4610aa9a2d5bacd833356b3605d9b21_2736	f0f6386fb62ec3a09e34ad652cf53efb_1237	S_aureus_10_01526
WP_001075809.1		M20 family metallopeptidase	4	4	1	1	648				1178	1178	1178	0c5d6aed1d23427ac77815eabcecea75_155	c4610aa9a2d5bacd833356b3605d9b21_153	f0f6386fb62ec3a09e34ad652cf53efb_3838	S_aureus_10_01079
lacA		galactose-6-phosphate isomerase subunit LacA	4	4	1	1	1816				428	428	428	0c5d6aed1d23427ac77815eabcecea75_4576	c4610aa9a2d5bacd833356b3605d9b21_4575	f0f6386fb62ec3a09e34ad652cf53efb_5021	S_aureus_10_01799
WP_000020803.1		T7SS effector LXG polymorphic toxin	4	4	1	1	2195				1406	1406	1406	0c5d6aed1d23427ac77815eabcecea75_1189	c4610aa9a2d5bacd833356b3605d9b21_1183	f0f6386fb62ec3a09e34ad652cf53efb_2794	S_aureus_10_00695
WP_045177078.1		superantigen-like protein SSL5	4	4	1	1	154				704	704	704	0c5d6aed1d23427ac77815eabcecea75_783	c4610aa9a2d5bacd833356b3605d9b21_777	f0f6386fb62ec3a09e34ad652cf53efb_3200	S_aureus_10_00779
noc		nucleoid occlusion protein	4	4	1	1	573				839	839	839	0c5d6aed1d23427ac77815eabcecea75_5633	c4610aa9a2d5bacd833356b3605d9b21_5632	f0f6386fb62ec3a09e34ad652cf53efb_3966	S_aureus_10_01159
WP_000671712.1		MAP domain-containing protein	4	4	1	1	1049				290	314	296	0c5d6aed1d23427ac77815eabcecea75_4037	c4610aa9a2d5bacd833356b3605d9b21_4038	f0f6386fb62ec3a09e34ad652cf53efb_67	S_aureus_10_02139
WP_000466743.1		GlsB/YeaQ/YmgE family stress response membrane protein	4	4	1	1	190				251	251	251	0c5d6aed1d23427ac77815eabcecea75_708	c4610aa9a2d5bacd833356b3605d9b21_704	f0f6386fb62ec3a09e34ad652cf53efb_3275	S_aureus_10_00814
WP_001024035.1		membrane protein	4	4	1	1	1760				350	350	350	0c5d6aed1d23427ac77815eabcecea75_4431	c4610aa9a2d5bacd833356b3605d9b21_4430	f0f6386fb62ec3a09e34ad652cf53efb_5170	S_aureus_10_02206
WP_001237005.1		YbaN family protein	4	4	1	1	711				383	383	383	0c5d6aed1d23427ac77815eabcecea75_285	c4610aa9a2d5bacd833356b3605d9b21_281	f0f6386fb62ec3a09e34ad652cf53efb_3708	S_aureus_10_01016
sdhA		succinate dehydrogenase flavoprotein subunit	4	4	1	1	2657				1766	1766	1766	0c5d6aed1d23427ac77815eabcecea75_2140	c4610aa9a2d5bacd833356b3605d9b21_2129	f0f6386fb62ec3a09e34ad652cf53efb_1845	S_aureus_10_00246
WP_001133025.1		5'-3' exonuclease	4	4	1	1	300				878	878	878	0c5d6aed1d23427ac77815eabcecea75_2762	c4610aa9a2d5bacd833356b3605d9b21_2756	f0f6386fb62ec3a09e34ad652cf53efb_1219	S_aureus_10_01536
WP_000667095.1		HAD family hydrolase	4	4	1	1	2172				647	647	647	0c5d6aed1d23427ac77815eabcecea75_1141	c4610aa9a2d5bacd833356b3605d9b21_1135	f0f6386fb62ec3a09e34ad652cf53efb_2842	S_aureus_10_00718
gndA		NADP-dependent phosphogluconate dehydrogenase	4	4	1	1	226				1406	1406	1406	0c5d6aed1d23427ac77815eabcecea75_2910	c4610aa9a2d5bacd833356b3605d9b21_2904	f0f6386fb62ec3a09e34ad652cf53efb_1067	S_aureus_10_01605
WP_000549232.1		polysaccharide deacetylase family protein	4	4	1	1	547				1124	1124	1124	0c5d6aed1d23427ac77815eabcecea75_5583	c4610aa9a2d5bacd833356b3605d9b21_5582	f0f6386fb62ec3a09e34ad652cf53efb_4016	S_aureus_10_01185
murT		lipid II isoglutaminyl synthase subunit MurT	4	4	1	1	1486				1313	1313	1313	0c5d6aed1d23427ac77815eabcecea75_3935	c4610aa9a2d5bacd833356b3605d9b21_3934	f0f6386fb62ec3a09e34ad652cf53efb_169	S_aureus_10_02094
WP_000230358.1		hypothetical protein	4	4	1	1	787				146	146	146	0c5d6aed1d23427ac77815eabcecea75_443	c4610aa9a2d5bacd833356b3605d9b21_439	f0f6386fb62ec3a09e34ad652cf53efb_3544	S_aureus_10_00941
QNV78445.1		SH3 domain-containing protein	4	4	1	1	1055				296	335	315	0c5d6aed1d23427ac77815eabcecea75_4051	c4610aa9a2d5bacd833356b3605d9b21_4050	f0f6386fb62ec3a09e34ad652cf53efb_53	S_aureus_10_02143
WP_000448085.1		glutathione peroxidase	4	4	1	1	2068				476	476	476	0c5d6aed1d23427ac77815eabcecea75_2461	c4610aa9a2d5bacd833356b3605d9b21_2448	f0f6386fb62ec3a09e34ad652cf53efb_1520	S_aureus_10_00091
WP_000608127.1		DUF72 domain-containing protein	4	4	1	1	2427				848	848	848	0c5d6aed1d23427ac77815eabcecea75_1672	c4610aa9a2d5bacd833356b3605d9b21_1660	f0f6386fb62ec3a09e34ad652cf53efb_2313	S_aureus_10_00467
recG		ATP-dependent DNA helicase RecG	4	4	1	1	2732				2060	2060	2060	0c5d6aed1d23427ac77815eabcecea75_2303	c4610aa9a2d5bacd833356b3605d9b21_2290	f0f6386fb62ec3a09e34ad652cf53efb_1678	S_aureus_10_00168
WP_000863556.1		superoxide dismutase	4	4	1	1	1150				599	599	599	0c5d6aed1d23427ac77815eabcecea75_2997	c4610aa9a2d5bacd833356b3605d9b21_2991	f0f6386fb62ec3a09e34ad652cf53efb_980	S_aureus_10_01646
WP_045178214.1		BglG family transcription antiterminator	4	4	1	1	507				1874	1874	1874	0c5d6aed1d23427ac77815eabcecea75_5503	c4610aa9a2d5bacd833356b3605d9b21_5500	f0f6386fb62ec3a09e34ad652cf53efb_4096	S_aureus_10_01225
WP_000163416.1		nucleoside hydrolase	4	4	1	1	1896				941	941	941	0c5d6aed1d23427ac77815eabcecea75_4744	c4610aa9a2d5bacd833356b3605d9b21_4739	f0f6386fb62ec3a09e34ad652cf53efb_4853	S_aureus_10_01875
WP_001191874.1		DUF1361 domain-containing protein	4	4	1	1	2290				617	617	617	0c5d6aed1d23427ac77815eabcecea75_1387	c4610aa9a2d5bacd833356b3605d9b21_1377	f0f6386fb62ec3a09e34ad652cf53efb_2596	S_aureus_10_00600
WP_001078309.1		PTS lactose/cellobiose transporter subunit IIA	4	4	1	1	1812				311	311	311	0c5d6aed1d23427ac77815eabcecea75_4568	c4610aa9a2d5bacd833356b3605d9b21_4567	f0f6386fb62ec3a09e34ad652cf53efb_5029	S_aureus_10_01795
WP_000455256.1		uracil-DNA glycosylase	4	4	1	1	2180				656	656	656	0c5d6aed1d23427ac77815eabcecea75_1157	c4610aa9a2d5bacd833356b3605d9b21_1151	f0f6386fb62ec3a09e34ad652cf53efb_2826	S_aureus_10_00710
WP_000031892.1		ribosomal L7Ae/L30e/S12e/Gadd45 family protein	4	4	1	1	35				254	254	254	0c5d6aed1d23427ac77815eabcecea75_1085	c4610aa9a2d5bacd833356b3605d9b21_1079	f0f6386fb62ec3a09e34ad652cf53efb_2898	S_aureus_10_00747
WP_000511067.1		phage portal protein	4	4	1	1	1078				1190	1250	1235	0c5d6aed1d23427ac77815eabcecea75_4097	c4610aa9a2d5bacd833356b3605d9b21_4096	f0f6386fb62ec3a09e34ad652cf53efb_7	S_aureus_10_02163
WP_000197961.1		ABC transporter permease	4	4	1	1	718				761	761	761	0c5d6aed1d23427ac77815eabcecea75_299	c4610aa9a2d5bacd833356b3605d9b21_295	f0f6386fb62ec3a09e34ad652cf53efb_3694	S_aureus_10_01009
WP_000953748.1		alkaline phosphatase	4	4	1	1	493				1424	1424	1424	0c5d6aed1d23427ac77815eabcecea75_5473	c4610aa9a2d5bacd833356b3605d9b21_5470	f0f6386fb62ec3a09e34ad652cf53efb_4126	S_aureus_10_01239
moaC		cyclic pyranopterin monophosphate synthase MoaC	4	4	1	1	1887				494	494	494	0c5d6aed1d23427ac77815eabcecea75_4726	c4610aa9a2d5bacd833356b3605d9b21_4721	f0f6386fb62ec3a09e34ad652cf53efb_4871	S_aureus_10_01866
WP_001018871.1		MTH1187 family thiamine-binding protein	4	4	1	1	1143				329	329	329	0c5d6aed1d23427ac77815eabcecea75_2983	c4610aa9a2d5bacd833356b3605d9b21_2977	f0f6386fb62ec3a09e34ad652cf53efb_994	S_aureus_10_01640
WP_001057965.1		ComF family protein	4	4	1	1	2348				674	674	674	0c5d6aed1d23427ac77815eabcecea75_1509	c4610aa9a2d5bacd833356b3605d9b21_1497	f0f6386fb62ec3a09e34ad652cf53efb_2474	S_aureus_10_00543
recN		DNA repair protein RecN	4	4	1	1	1116				1679	1679	1679	0c5d6aed1d23427ac77815eabcecea75_2928	c4610aa9a2d5bacd833356b3605d9b21_2922	f0f6386fb62ec3a09e34ad652cf53efb_1049	S_aureus_10_01614
purN		phosphoribosylglycinamide formyltransferase	4	4	1	1	2579				566	566	566	0c5d6aed1d23427ac77815eabcecea75_1985	c4610aa9a2d5bacd833356b3605d9b21_1972	f0f6386fb62ec3a09e34ad652cf53efb_2000	S_aureus_10_00320
guaB		IMP dehydrogenase	4	4	1	1	174				1466	1466	1466	0c5d6aed1d23427ac77815eabcecea75_741	c4610aa9a2d5bacd833356b3605d9b21_737	f0f6386fb62ec3a09e34ad652cf53efb_3242	S_aureus_10_00799
addA		helicase-exonuclease AddAB subunit AddA	4	4	1	1	2473				3653	3653	3653	0c5d6aed1d23427ac77815eabcecea75_1764	c4610aa9a2d5bacd833356b3605d9b21_1752	f0f6386fb62ec3a09e34ad652cf53efb_2221	S_aureus_10_00422
WP_001047239.1		Rrf2 family transcriptional regulator	4	4	1	1	2193				440	440	440	0c5d6aed1d23427ac77815eabcecea75_1185	c4610aa9a2d5bacd833356b3605d9b21_1179	f0f6386fb62ec3a09e34ad652cf53efb_2798	S_aureus_10_00696
WP_000365299.1		hypothetical protein	4	4	1	1	1079				200	239	219	0c5d6aed1d23427ac77815eabcecea75_4099	c4610aa9a2d5bacd833356b3605d9b21_4098	f0f6386fb62ec3a09e34ad652cf53efb_5	S_aureus_10_02164
glpK		glycerol kinase GlpK	4	4	1	1	2073				1496	1496	1496	0c5d6aed1d23427ac77815eabcecea75_2451	c4610aa9a2d5bacd833356b3605d9b21_2438	f0f6386fb62ec3a09e34ad652cf53efb_1530	S_aureus_10_00096
WP_000038231.1		DUF1433 domain-containing protein	4	4	1	1	916				419	419	419	0c5d6aed1d23427ac77815eabcecea75_5149	c4610aa9a2d5bacd833356b3605d9b21_5144	f0f6386fb62ec3a09e34ad652cf53efb_4448	S_aureus_10_01387
ftsA		cell division protein FtsA	4	4	1	1	2692				1406	1406	1406	0c5d6aed1d23427ac77815eabcecea75_2219	c4610aa9a2d5bacd833356b3605d9b21_2208	f0f6386fb62ec3a09e34ad652cf53efb_1762	S_aureus_10_00210
scpA		cysteine protease staphopain A	4	4	1	1	1468				1166	1166	1166	0c5d6aed1d23427ac77815eabcecea75_3973	c4610aa9a2d5bacd833356b3605d9b21_3972	f0f6386fb62ec3a09e34ad652cf53efb_131	S_aureus_10_02111
ygs		S1 domain-containing post-transcriptional regulator Ygs	4	4	1	1	2461				377	377	377	0c5d6aed1d23427ac77815eabcecea75_1740	c4610aa9a2d5bacd833356b3605d9b21_1728	f0f6386fb62ec3a09e34ad652cf53efb_2245	S_aureus_10_00434
WP_000613738.1		3'-5' exonuclease	4	4	1	1	1483				554	554	554	0c5d6aed1d23427ac77815eabcecea75_3941	c4610aa9a2d5bacd833356b3605d9b21_3940	f0f6386fb62ec3a09e34ad652cf53efb_163	S_aureus_10_02096
WP_000932073.1		ferrous iron transport protein A	4	4	1	1	414				227	227	227	0c5d6aed1d23427ac77815eabcecea75_5309	c4610aa9a2d5bacd833356b3605d9b21_5306	f0f6386fb62ec3a09e34ad652cf53efb_4290	S_aureus_10_01312
csoR		copper-sensing transcriptional repressor CsoR	4	4	1	1	1713				293	293	293	0c5d6aed1d23427ac77815eabcecea75_4334	c4610aa9a2d5bacd833356b3605d9b21_4333	f0f6386fb62ec3a09e34ad652cf53efb_5267	S_aureus_10_02253
WP_000350967.1		anthranilate synthase component I	4	4	1	1	1996				1406	1406	1406	0c5d6aed1d23427ac77815eabcecea75_2607	c4610aa9a2d5bacd833356b3605d9b21_2600	f0f6386fb62ec3a09e34ad652cf53efb_1372	S_aureus_10_00022
WP_000604817.1		aminodeoxychorismate/anthranilate synthase component II	4	4	1	1	1995				566	566	566	0c5d6aed1d23427ac77815eabcecea75_2609	c4610aa9a2d5bacd833356b3605d9b21_2602	f0f6386fb62ec3a09e34ad652cf53efb_1370	S_aureus_10_00021
WP_000817289.1		HNH endonuclease	4	4	1	1	1082				344	353	346	0c5d6aed1d23427ac77815eabcecea75_4105	c4610aa9a2d5bacd833356b3605d9b21_4104	f0f6386fb62ec3a09e34ad652cf53efb_5496	S_aureus_10_02167
WP_001246014.1		helix-turn-helix transcriptional regulator	4	4	1	1	216				203	203	203	0c5d6aed1d23427ac77815eabcecea75_657	c4610aa9a2d5bacd833356b3605d9b21_651	f0f6386fb62ec3a09e34ad652cf53efb_3326	S_aureus_10_00838
rplE		50S ribosomal protein L5	4	4	1	1	1850				539	539	539	0c5d6aed1d23427ac77815eabcecea75_4650	c4610aa9a2d5bacd833356b3605d9b21_4645	f0f6386fb62ec3a09e34ad652cf53efb_4947	S_aureus_10_01831
WP_000823230.1		nucleoside hydrolase	4	4	1	1	781				935	935	935	0c5d6aed1d23427ac77815eabcecea75_429	c4610aa9a2d5bacd833356b3605d9b21_425	f0f6386fb62ec3a09e34ad652cf53efb_3558	S_aureus_10_00947
WP_000181326.1		lactonase family protein	4	4	1	1	1453				1028	1028	1028	0c5d6aed1d23427ac77815eabcecea75_4003	c4610aa9a2d5bacd833356b3605d9b21_4002	f0f6386fb62ec3a09e34ad652cf53efb_101	S_aureus_10_02124
fakA		fatty acid kinase catalytic subunit FakA	4	4	1	1	2731				1646	1646	1646	0c5d6aed1d23427ac77815eabcecea75_2301	c4610aa9a2d5bacd833356b3605d9b21_2288	f0f6386fb62ec3a09e34ad652cf53efb_1680	S_aureus_10_00169
WP_001094394.1		F0F1 ATP synthase subunit epsilon	4	4	1	1	1727				404	404	404	0c5d6aed1d23427ac77815eabcecea75_4365	c4610aa9a2d5bacd833356b3605d9b21_4364	f0f6386fb62ec3a09e34ad652cf53efb_5236	S_aureus_10_02239
menH		2-succinyl-6-hydroxy-2,4-cyclohexadiene-1-carboxylate synthase	4	4	1	1	2551				803	803	803	0c5d6aed1d23427ac77815eabcecea75_1927	c4610aa9a2d5bacd833356b3605d9b21_1914	f0f6386fb62ec3a09e34ad652cf53efb_2058	S_aureus_10_00347
WP_045177543.1		bifunctional homocysteine S-methyltransferase/methylenetetrahydrofolate reductase	4	4	1	1	208				1841	1841	1841	0c5d6aed1d23427ac77815eabcecea75_673	c4610aa9a2d5bacd833356b3605d9b21_667	f0f6386fb62ec3a09e34ad652cf53efb_3310	S_aureus_10_00830
WP_001058299.1		hypothetical protein	4	4	1	1	2383				323	323	323	0c5d6aed1d23427ac77815eabcecea75_1581	c4610aa9a2d5bacd833356b3605d9b21_1567	f0f6386fb62ec3a09e34ad652cf53efb_2404	S_aureus_10_00510
gdpP		cyclic-di-AMP phosphodiesterase GdpP	4	4	1	1	592				1967	1967	1967	0c5d6aed1d23427ac77815eabcecea75_31	c4610aa9a2d5bacd833356b3605d9b21_31	f0f6386fb62ec3a09e34ad652cf53efb_3926	S_aureus_10_01140
group_118		hypothetical protein	4	4	1	1	1088				191	218	197	0c5d6aed1d23427ac77815eabcecea75_4117	c4610aa9a2d5bacd833356b3605d9b21_4116	f0f6386fb62ec3a09e34ad652cf53efb_5484	S_aureus_10_02172
WP_000668339.1		hypothetical protein	4	4	1	1	2600				626	626	626	0c5d6aed1d23427ac77815eabcecea75_2026	c4610aa9a2d5bacd833356b3605d9b21_2015	f0f6386fb62ec3a09e34ad652cf53efb_1959	S_aureus_10_00300
sak		staphylokinase	4	4	1	1	1056				491	491	491	0c5d6aed1d23427ac77815eabcecea75_4053	c4610aa9a2d5bacd833356b3605d9b21_4052	f0f6386fb62ec3a09e34ad652cf53efb_51	S_aureus_10_02144
recA		recombinase RecA	4	4	1	1	2087				1043	1043	1043	0c5d6aed1d23427ac77815eabcecea75_2423	c4610aa9a2d5bacd833356b3605d9b21_2410	f0f6386fb62ec3a09e34ad652cf53efb_1558	S_aureus_10_00110
WP_000808892.1		aldo/keto reductase	4	4	1	1	2201				938	938	938	0c5d6aed1d23427ac77815eabcecea75_1201	c4610aa9a2d5bacd833356b3605d9b21_1195	f0f6386fb62ec3a09e34ad652cf53efb_2782	S_aureus_10_00690
WP_000287923.1		flavin reductase family protein	4	4	1	1	526				611	611	611	0c5d6aed1d23427ac77815eabcecea75_5541	c4610aa9a2d5bacd833356b3605d9b21_5538	f0f6386fb62ec3a09e34ad652cf53efb_4058	S_aureus_10_01206
WP_000928413.1		TerC family protein	4	4	1	1	2525				803	803	803	0c5d6aed1d23427ac77815eabcecea75_1869	c4610aa9a2d5bacd833356b3605d9b21_1856	f0f6386fb62ec3a09e34ad652cf53efb_2116	S_aureus_10_00370
WP_001134197.1		stage 0 sporulation family protein	4	4	1	1	97				803	803	803	0c5d6aed1d23427ac77815eabcecea75_912	c4610aa9a2d5bacd833356b3605d9b21_906	f0f6386fb62ec3a09e34ad652cf53efb_3071	S_aureus_10_02574
WP_000651160.1		alanine:cation symporter family protein	4	4	1	1	2007				1460	1460	1460	0c5d6aed1d23427ac77815eabcecea75_2585	c4610aa9a2d5bacd833356b3605d9b21_2578	f0f6386fb62ec3a09e34ad652cf53efb_1394	S_aureus_10_00032
sucB		dihydrolipoyllysine-residue succinyltransferase	4	4	1	1	825				1268	1268	1268	0c5d6aed1d23427ac77815eabcecea75_2704	c4610aa9a2d5bacd833356b3605d9b21_2696	f0f6386fb62ec3a09e34ad652cf53efb_1277	S_aureus_10_01508
WP_045176833.1		O-antigen ligase family protein	4	4	1	1	676				1238	1238	1238	0c5d6aed1d23427ac77815eabcecea75_213	c4610aa9a2d5bacd833356b3605d9b21_211	f0f6386fb62ec3a09e34ad652cf53efb_3780	S_aureus_10_01052
WP_001013104.1		hypothetical protein	4	4	1	1	1642				125	146	140	0c5d6aed1d23427ac77815eabcecea75_4175	c4610aa9a2d5bacd833356b3605d9b21_4174	f0f6386fb62ec3a09e34ad652cf53efb_5426	S_aureus_10_02301
msrA		peptide-methionine (S)-S-oxide reductase MsrA	4	4	1	1	2002				509	509	509	0c5d6aed1d23427ac77815eabcecea75_2595	c4610aa9a2d5bacd833356b3605d9b21_2588	f0f6386fb62ec3a09e34ad652cf53efb_1384	S_aureus_10_00028
WP_000493888.1		riboflavin synthase	4	4	1	1	1359				632	632	632	0c5d6aed1d23427ac77815eabcecea75_3432	c4610aa9a2d5bacd833356b3605d9b21_3425	f0f6386fb62ec3a09e34ad652cf53efb_545	S_aureus_10_02025
ftsY		signal recognition particle-docking protein FtsY	4	4	1	1	2139				1250	1250	1250	0c5d6aed1d23427ac77815eabcecea75_2319	c4610aa9a2d5bacd833356b3605d9b21_2306	f0f6386fb62ec3a09e34ad652cf53efb_1662	S_aureus_10_00160
WP_000134779.1		DUF1292 domain-containing protein	4	4	1	1	1209				308	308	308	0c5d6aed1d23427ac77815eabcecea75_3117	c4610aa9a2d5bacd833356b3605d9b21_3111	f0f6386fb62ec3a09e34ad652cf53efb_860	S_aureus_10_01707
WP_000176400.1		ribonuclease HII	4	4	1	1	2130				767	767	767	0c5d6aed1d23427ac77815eabcecea75_2337	c4610aa9a2d5bacd833356b3605d9b21_2324	f0f6386fb62ec3a09e34ad652cf53efb_1644	S_aureus_10_00151
WP_045178372.1		urease accessory protein UreF	4	4	1	1	1904				689	689	689	0c5d6aed1d23427ac77815eabcecea75_4760	c4610aa9a2d5bacd833356b3605d9b21_4755	f0f6386fb62ec3a09e34ad652cf53efb_4837	S_aureus_10_01883
WP_000454994.1		hypothetical protein	4	4	1	1	1092				281	281	281	0c5d6aed1d23427ac77815eabcecea75_4125	c4610aa9a2d5bacd833356b3605d9b21_4124	f0f6386fb62ec3a09e34ad652cf53efb_5476	S_aureus_10_02176
rplX		50S ribosomal protein L24	4	4	1	1	1851				317	317	317	0c5d6aed1d23427ac77815eabcecea75_4652	c4610aa9a2d5bacd833356b3605d9b21_4647	f0f6386fb62ec3a09e34ad652cf53efb_4945	S_aureus_10_01832
map		type I methionyl aminopeptidase	4	4	1	1	1491				758	758	758	0c5d6aed1d23427ac77815eabcecea75_3925	c4610aa9a2d5bacd833356b3605d9b21_3924	f0f6386fb62ec3a09e34ad652cf53efb_179	S_aureus_10_02090
asp1		accessory Sec system protein Asp1	4	4	1	1	519				1553	1553	1553	0c5d6aed1d23427ac77815eabcecea75_5527	c4610aa9a2d5bacd833356b3605d9b21_5524	f0f6386fb62ec3a09e34ad652cf53efb_4072	S_aureus_10_01213
mnhF2		Na+/H+ antiporter Mnh2 subunit G	4	7	1.75	1	2226				302	713	418	0c5d6aed1d23427ac77815eabcecea75_1255 0c5d6aed1d23427ac77815eabcecea75_1257	c4610aa9a2d5bacd833356b3605d9b21_1247	f0f6386fb62ec3a09e34ad652cf53efb_2728 f0f6386fb62ec3a09e34ad652cf53efb_2726	S_aureus_10_00664 S_aureus_10_00663
WP_000120323.1		hypothetical protein	4	4	1	1	1655				1103	1259	1220	0c5d6aed1d23427ac77815eabcecea75_4201	c4610aa9a2d5bacd833356b3605d9b21_4200	f0f6386fb62ec3a09e34ad652cf53efb_5400	S_aureus_10_02314
galU		UTP--glucose-1-phosphate uridylyltransferase GalU	4	4	1	1	892				866	866	866	0c5d6aed1d23427ac77815eabcecea75_5201	c4610aa9a2d5bacd833356b3605d9b21_5196	f0f6386fb62ec3a09e34ad652cf53efb_4398	S_aureus_10_01363
WP_000425353.1		valine--tRNA ligase	4	4	1	1	1250				2630	2630	2630	0c5d6aed1d23427ac77815eabcecea75_3205	c4610aa9a2d5bacd833356b3605d9b21_3199	f0f6386fb62ec3a09e34ad652cf53efb_772	S_aureus_10_01746
WP_000161314.1		ROK family glucokinase	4	4	1	1	1144				986	986	986	0c5d6aed1d23427ac77815eabcecea75_2985	c4610aa9a2d5bacd833356b3605d9b21_2979	f0f6386fb62ec3a09e34ad652cf53efb_992	S_aureus_10_01641
WP_001074539.1		glucosaminidase domain-containing protein	4	4	1	1	2559				3770	3770	3770	0c5d6aed1d23427ac77815eabcecea75_1945	c4610aa9a2d5bacd833356b3605d9b21_1932	f0f6386fb62ec3a09e34ad652cf53efb_2040	S_aureus_10_00339
WP_045178260.1		linear amide C-N hydrolase	4	4	1	1	378				992	992	992	0c5d6aed1d23427ac77815eabcecea75_499	c4610aa9a2d5bacd833356b3605d9b21_495	f0f6386fb62ec3a09e34ad652cf53efb_3488	S_aureus_10_00915
WP_001076673.1		M42 family metallopeptidase	4	4	1	1	936				1076	1076	1076	0c5d6aed1d23427ac77815eabcecea75_5109	c4610aa9a2d5bacd833356b3605d9b21_5104	f0f6386fb62ec3a09e34ad652cf53efb_4488	S_aureus_10_01407
vraX		C1q-binding complement inhibitor VraX	4	4	1	1	2178				167	167	167	0c5d6aed1d23427ac77815eabcecea75_1153	c4610aa9a2d5bacd833356b3605d9b21_1147	f0f6386fb62ec3a09e34ad652cf53efb_2830	S_aureus_10_00712
WP_000367419.1		BrxA/BrxB family bacilliredoxin	4	4	1	1	1111				437	437	437	0c5d6aed1d23427ac77815eabcecea75_2918	c4610aa9a2d5bacd833356b3605d9b21_2912	f0f6386fb62ec3a09e34ad652cf53efb_1059	S_aureus_10_01609
WP_001052491.1		anti-sigma factor antagonist	4	4	1	1	1692				326	326	326	0c5d6aed1d23427ac77815eabcecea75_4292	c4610aa9a2d5bacd833356b3605d9b21_4291	f0f6386fb62ec3a09e34ad652cf53efb_5309	S_aureus_10_02273
WP_000033477.1		ECF transporter S component	4	4	1	1	2584				575	575	575	0c5d6aed1d23427ac77815eabcecea75_1995	c4610aa9a2d5bacd833356b3605d9b21_1982	f0f6386fb62ec3a09e34ad652cf53efb_1990	S_aureus_10_00315
hld		delta-hemolysin	4	4	1	1	1658				80	134	107	0c5d6aed1d23427ac77815eabcecea75_4207	c4610aa9a2d5bacd833356b3605d9b21_4206	f0f6386fb62ec3a09e34ad652cf53efb_5394	S_aureus_10_02317
WP_000713071.1		DUF4097 family beta strand repeat-containing protein	4	4	1	1	1449				842	842	842	0c5d6aed1d23427ac77815eabcecea75_4013	c4610aa9a2d5bacd833356b3605d9b21_4014	f0f6386fb62ec3a09e34ad652cf53efb_91	S_aureus_10_02128
lacG		6-phospho-beta-galactosidase	4	4	1	1	1810				1412	1412	1412	0c5d6aed1d23427ac77815eabcecea75_4564	c4610aa9a2d5bacd833356b3605d9b21_4563	f0f6386fb62ec3a09e34ad652cf53efb_5033	S_aureus_10_01793
WP_001151451.1		FMN-dependent NADH-azoreductase	4	4	1	1	750				626	626	626	0c5d6aed1d23427ac77815eabcecea75_363	c4610aa9a2d5bacd833356b3605d9b21_359	f0f6386fb62ec3a09e34ad652cf53efb_3630	S_aureus_10_00978
sbnB		N-[(2S)-2-amino-2-carboxyethyl]-L-glutamate dehydrogenase SbnB	4	4	1	1	662				1010	1010	1010	0c5d6aed1d23427ac77815eabcecea75_185	c4610aa9a2d5bacd833356b3605d9b21_183	f0f6386fb62ec3a09e34ad652cf53efb_3808	S_aureus_10_01065
WP_000155383.1		energy-coupling factor transporter ATPase	4	4	1	1	1833				860	860	860	0c5d6aed1d23427ac77815eabcecea75_4616	c4610aa9a2d5bacd833356b3605d9b21_4611	f0f6386fb62ec3a09e34ad652cf53efb_4981	S_aureus_10_01814
WP_000691584.1		GntR family transcriptional regulator	4	4	1	1	1045				380	380	380	0c5d6aed1d23427ac77815eabcecea75_4029	c4610aa9a2d5bacd833356b3605d9b21_4030	f0f6386fb62ec3a09e34ad652cf53efb_75	S_aureus_10_02136
WP_000604514.1		aminodeoxychorismate/anthranilate synthase component II	4	4	1	1	2310				593	593	593	0c5d6aed1d23427ac77815eabcecea75_1427	c4610aa9a2d5bacd833356b3605d9b21_1417	f0f6386fb62ec3a09e34ad652cf53efb_2556	S_aureus_10_00580
splA		serine protease SplA	4	4	1	1	1409				707	707	707	0c5d6aed1d23427ac77815eabcecea75_3532	c4610aa9a2d5bacd833356b3605d9b21_3527	f0f6386fb62ec3a09e34ad652cf53efb_447	S_aureus_10_02350
WP_000361527.1		Abi family protein	4	4	1	1	172				1106	1106	1106	0c5d6aed1d23427ac77815eabcecea75_747	c4610aa9a2d5bacd833356b3605d9b21_741	f0f6386fb62ec3a09e34ad652cf53efb_3236	S_aureus_10_00797
WP_045178356.1		MOSC domain-containing protein	4	4	1	1	1950				653	653	653	0c5d6aed1d23427ac77815eabcecea75_4855	c4610aa9a2d5bacd833356b3605d9b21_4850	f0f6386fb62ec3a09e34ad652cf53efb_4742	S_aureus_10_01927
agrB		accessory gene regulator AgrB	4	4	1	1	1659				569	623	582	0c5d6aed1d23427ac77815eabcecea75_4209	c4610aa9a2d5bacd833356b3605d9b21_4208	f0f6386fb62ec3a09e34ad652cf53efb_5392	S_aureus_10_02318
era		GTPase Era	4	4	1	1	1164				899	899	899	0c5d6aed1d23427ac77815eabcecea75_3025	c4610aa9a2d5bacd833356b3605d9b21_3019	f0f6386fb62ec3a09e34ad652cf53efb_952	S_aureus_10_01660
WP_000865624.1		DUF402 domain-containing protein	4	4	1	1	2268				644	644	644	0c5d6aed1d23427ac77815eabcecea75_1343	c4610aa9a2d5bacd833356b3605d9b21_1333	f0f6386fb62ec3a09e34ad652cf53efb_2640	S_aureus_10_00622
WP_000228666.1		low molecular weight phosphotyrosine protein phosphatase	4	4	1	1	1498				464	464	464	0c5d6aed1d23427ac77815eabcecea75_3911	c4610aa9a2d5bacd833356b3605d9b21_3910	f0f6386fb62ec3a09e34ad652cf53efb_193	S_aureus_10_02083
WP_001077829.1		energy-coupling factor transporter transmembrane protein EcfT	4	4	1	1	549				833	833	833	0c5d6aed1d23427ac77815eabcecea75_5587	c4610aa9a2d5bacd833356b3605d9b21_5586	f0f6386fb62ec3a09e34ad652cf53efb_4012	S_aureus_10_01183
WP_000901023.1		hypothetical protein	4	4	1	1	1526				395	395	395	0c5d6aed1d23427ac77815eabcecea75_3760	c4610aa9a2d5bacd833356b3605d9b21_3759	f0f6386fb62ec3a09e34ad652cf53efb_347	S_aureus_10_02436
mnmG		tRNA uridine-5-carboxymethylaminomethyl(34) synthesis enzyme MnmG	4	4	1	1	575				1877	1877	1877	0c5d6aed1d23427ac77815eabcecea75_5637	c4610aa9a2d5bacd833356b3605d9b21_5636	f0f6386fb62ec3a09e34ad652cf53efb_3962	S_aureus_10_01157
pruA		L-glutamate gamma-semialdehyde dehydrogenase	4	4	1	1	418				1544	1544	1544	0c5d6aed1d23427ac77815eabcecea75_5317	c4610aa9a2d5bacd833356b3605d9b21_5314	f0f6386fb62ec3a09e34ad652cf53efb_4282	S_aureus_10_01309
WP_001192075.1		multidrug effflux MFS transporter	4	4	1	1	959				1211	1211	1211	0c5d6aed1d23427ac77815eabcecea75_5063	c4610aa9a2d5bacd833356b3605d9b21_5058	f0f6386fb62ec3a09e34ad652cf53efb_4534	S_aureus_10_01428
lacC		tagatose-6-phosphate kinase	4	4	1	1	1814				932	932	932	0c5d6aed1d23427ac77815eabcecea75_4572	c4610aa9a2d5bacd833356b3605d9b21_4571	f0f6386fb62ec3a09e34ad652cf53efb_5025	S_aureus_10_01797
WP_000815795.1		PTS sugar transporter subunit IIB	4	4	1	1	784				278	278	278	0c5d6aed1d23427ac77815eabcecea75_437	c4610aa9a2d5bacd833356b3605d9b21_433	f0f6386fb62ec3a09e34ad652cf53efb_3550	S_aureus_10_00944
WP_001789596.1		GHKL domain-containing protein	4	4	1	1	1661				1244	1292	1280	0c5d6aed1d23427ac77815eabcecea75_4213	c4610aa9a2d5bacd833356b3605d9b21_4212	f0f6386fb62ec3a09e34ad652cf53efb_5388	S_aureus_10_02320
WP_000214890.1		YmfK family protein	4	4	1	1	2091				827	827	827	0c5d6aed1d23427ac77815eabcecea75_2415	c4610aa9a2d5bacd833356b3605d9b21_2402	f0f6386fb62ec3a09e34ad652cf53efb_1566	S_aureus_10_00114
WP_000570070.1		ABC transporter ATP-binding protein	4	4	1	1	376				659	659	659	0c5d6aed1d23427ac77815eabcecea75_503	c4610aa9a2d5bacd833356b3605d9b21_499	f0f6386fb62ec3a09e34ad652cf53efb_3484	S_aureus_10_00913
hflX		GTPase HflX	4	4	1	1	2067				1238	1238	1238	0c5d6aed1d23427ac77815eabcecea75_2463	c4610aa9a2d5bacd833356b3605d9b21_2450	f0f6386fb62ec3a09e34ad652cf53efb_1518	S_aureus_10_00090
WP_001165962.1		carboxylesterase	4	4	1	1	2379				740	740	740	0c5d6aed1d23427ac77815eabcecea75_1570	c4610aa9a2d5bacd833356b3605d9b21_1558	f0f6386fb62ec3a09e34ad652cf53efb_2413	S_aureus_10_00514
menC		o-succinylbenzoate synthase	4	4	1	1	1382				1001	1001	1001	0c5d6aed1d23427ac77815eabcecea75_3480	c4610aa9a2d5bacd833356b3605d9b21_3473	f0f6386fb62ec3a09e34ad652cf53efb_497	S_aureus_10_02048
WP_000159631.1		D-alanine--D-alanine ligase	4	4	1	1	1709				1070	1070	1070	0c5d6aed1d23427ac77815eabcecea75_4326	c4610aa9a2d5bacd833356b3605d9b21_4325	f0f6386fb62ec3a09e34ad652cf53efb_5275	S_aureus_10_02257
femX		lipid II:glycine glycyltransferase	4	4	1	1	1874				1265	1265	1265	0c5d6aed1d23427ac77815eabcecea75_4700	c4610aa9a2d5bacd833356b3605d9b21_4695	f0f6386fb62ec3a09e34ad652cf53efb_4897	S_aureus_10_01854
WP_000422908.1		nitroreductase	4	4	1	1	2406				539	539	539	0c5d6aed1d23427ac77815eabcecea75_1629	c4610aa9a2d5bacd833356b3605d9b21_1615	f0f6386fb62ec3a09e34ad652cf53efb_2356	S_aureus_10_00488
WP_001110179.1		hypothetical protein	4	4	1	1	1492				386	386	386	0c5d6aed1d23427ac77815eabcecea75_3923	c4610aa9a2d5bacd833356b3605d9b21_3922	f0f6386fb62ec3a09e34ad652cf53efb_181	S_aureus_10_02089
WP_000435070.1		hypothetical protein	4	4	1	1	2046				197	197	197	0c5d6aed1d23427ac77815eabcecea75_2503	c4610aa9a2d5bacd833356b3605d9b21_2496	f0f6386fb62ec3a09e34ad652cf53efb_1476	S_aureus_10_00070
WP_045177640.1		YeeE/YedE family protein	4	4	1	1	1668				1028	1079	1066	0c5d6aed1d23427ac77815eabcecea75_4229	c4610aa9a2d5bacd833356b3605d9b21_4228	f0f6386fb62ec3a09e34ad652cf53efb_5372	S_aureus_10_02327
pde2		pApA hydrolase Pde2	4	4	1	1	1290				941	941	941	0c5d6aed1d23427ac77815eabcecea75_3292	c4610aa9a2d5bacd833356b3605d9b21_3285	f0f6386fb62ec3a09e34ad652cf53efb_685	S_aureus_10_01963
sbnE		L-2,3-diaminopropanoate--citrate ligase SbnE	4	4	1	1	665				1736	1736	1736	0c5d6aed1d23427ac77815eabcecea75_191	c4610aa9a2d5bacd833356b3605d9b21_189	f0f6386fb62ec3a09e34ad652cf53efb_3802	S_aureus_10_01062
WP_001045085.1		TrkH family potassium uptake protein	4	4	1	1	1651				1307	1307	1307	0c5d6aed1d23427ac77815eabcecea75_4193	c4610aa9a2d5bacd833356b3605d9b21_4192	f0f6386fb62ec3a09e34ad652cf53efb_5408	S_aureus_10_02310
WP_000075714.1		heme-dependent peroxidase	4	4	1	1	2185				752	752	752	0c5d6aed1d23427ac77815eabcecea75_1169	c4610aa9a2d5bacd833356b3605d9b21_1163	f0f6386fb62ec3a09e34ad652cf53efb_2814	S_aureus_10_00704
WP_000615461.1		amino acid ABC transporter ATP-binding protein	4	4	1	1	982				731	731	731	0c5d6aed1d23427ac77815eabcecea75_5013	c4610aa9a2d5bacd833356b3605d9b21_5008	f0f6386fb62ec3a09e34ad652cf53efb_4584	S_aureus_10_01450
WP_000570648.1		Ig-like domain-containing protein	4	4	1	1	1070				953	953	953	0c5d6aed1d23427ac77815eabcecea75_4081	c4610aa9a2d5bacd833356b3605d9b21_4080	f0f6386fb62ec3a09e34ad652cf53efb_23	S_aureus_10_02155
rplW		50S ribosomal protein L23	4	4	1	1	1860				275	275	275	0c5d6aed1d23427ac77815eabcecea75_4670	c4610aa9a2d5bacd833356b3605d9b21_4665	f0f6386fb62ec3a09e34ad652cf53efb_4927	S_aureus_10_01841
WP_001224379.1		hypothetical protein	4	4	1	1	912				191	191	191	0c5d6aed1d23427ac77815eabcecea75_5159	c4610aa9a2d5bacd833356b3605d9b21_5154	f0f6386fb62ec3a09e34ad652cf53efb_4438	S_aureus_10_01383
trxB		thioredoxin-disulfide reductase	4	4	1	1	2364				935	935	935	0c5d6aed1d23427ac77815eabcecea75_1540	c4610aa9a2d5bacd833356b3605d9b21_1528	f0f6386fb62ec3a09e34ad652cf53efb_2443	S_aureus_10_00530
hprK		HPr kinase/phosphorylase	4	4	1	1	2360				932	932	932	0c5d6aed1d23427ac77815eabcecea75_1532	c4610aa9a2d5bacd833356b3605d9b21_1520	f0f6386fb62ec3a09e34ad652cf53efb_2451	S_aureus_10_00534
rsbW		anti-sigma B factor RsbW	4	4	1	1	1691				479	509	486	0c5d6aed1d23427ac77815eabcecea75_4290	c4610aa9a2d5bacd833356b3605d9b21_4289	f0f6386fb62ec3a09e34ad652cf53efb_5311	S_aureus_10_02274
WP_000437472.1		phosphocarrier protein HPr	4	4	1	1	2590				266	266	266	0c5d6aed1d23427ac77815eabcecea75_2006	c4610aa9a2d5bacd833356b3605d9b21_1995	f0f6386fb62ec3a09e34ad652cf53efb_1979	S_aureus_10_00309
rplL		50S ribosomal protein L7/L12	4	4	1	1	39				368	368	368	0c5d6aed1d23427ac77815eabcecea75_1077	c4610aa9a2d5bacd833356b3605d9b21_1071	f0f6386fb62ec3a09e34ad652cf53efb_2906	S_aureus_10_00751
WP_045177088.1		superantigen-like protein SSL11	4	4	1	1	147				683	683	683	0c5d6aed1d23427ac77815eabcecea75_797	c4610aa9a2d5bacd833356b3605d9b21_791	f0f6386fb62ec3a09e34ad652cf53efb_3186	S_aureus_10_02531
group_1253	brnQ	branched-chain amino acid transport system II carrier protein	4	4	1	1	730				1355	1355	1355	0c5d6aed1d23427ac77815eabcecea75_323	c4610aa9a2d5bacd833356b3605d9b21_319	f0f6386fb62ec3a09e34ad652cf53efb_3670	S_aureus_10_00997
WP_001163801.1		hypothetical protein	4	4	1	1	256				953	953	953	0c5d6aed1d23427ac77815eabcecea75_2853	c4610aa9a2d5bacd833356b3605d9b21_2847	f0f6386fb62ec3a09e34ad652cf53efb_1128	S_aureus_10_01577
WP_001245577.1		iron chelate uptake ABC transporter family permease subunit	4	4	1	1	2331				956	956	956	0c5d6aed1d23427ac77815eabcecea75_1475	c4610aa9a2d5bacd833356b3605d9b21_1463	f0f6386fb62ec3a09e34ad652cf53efb_2508	S_aureus_10_00560
sbnH		staphyloferrin B biosynthesis decarboxylase SbnH	4	4	1	1	668				1202	1202	1202	0c5d6aed1d23427ac77815eabcecea75_197	c4610aa9a2d5bacd833356b3605d9b21_195	f0f6386fb62ec3a09e34ad652cf53efb_3796	S_aureus_10_01059
WP_001106738.1		glycosyltransferase	4	4	1	1	2164				1472	1472	1472	0c5d6aed1d23427ac77815eabcecea75_1125	c4610aa9a2d5bacd833356b3605d9b21_1119	f0f6386fb62ec3a09e34ad652cf53efb_2858	S_aureus_10_00726
WP_000538141.1		HD domain-containing protein	4	4	1	1	2356				650	650	650	0c5d6aed1d23427ac77815eabcecea75_1524	c4610aa9a2d5bacd833356b3605d9b21_1512	f0f6386fb62ec3a09e34ad652cf53efb_2459	S_aureus_10_00538
yajC		preprotein translocase subunit YajC	4	4	1	1	1231				260	260	260	0c5d6aed1d23427ac77815eabcecea75_3166	c4610aa9a2d5bacd833356b3605d9b21_3160	f0f6386fb62ec3a09e34ad652cf53efb_811	S_aureus_10_01729
WP_000846746.1		YwpF-like family protein	4	4	1	1	1723				440	503	455	0c5d6aed1d23427ac77815eabcecea75_4355	c4610aa9a2d5bacd833356b3605d9b21_4354	f0f6386fb62ec3a09e34ad652cf53efb_5246	S_aureus_10_02243
WP_000072443.1		hypothetical protein	4	4	1	1	931				749	749	749	0c5d6aed1d23427ac77815eabcecea75_5119	c4610aa9a2d5bacd833356b3605d9b21_5114	f0f6386fb62ec3a09e34ad652cf53efb_4478	S_aureus_10_01402
rplO		50S ribosomal protein L15	4	4	1	1	1843				440	440	440	0c5d6aed1d23427ac77815eabcecea75_4636	c4610aa9a2d5bacd833356b3605d9b21_4631	f0f6386fb62ec3a09e34ad652cf53efb_4961	S_aureus_10_01824
ilvA		threonine ammonia-lyase IlvA	4	4	1	1	1686				1268	1268	1268	0c5d6aed1d23427ac77815eabcecea75_4265	c4610aa9a2d5bacd833356b3605d9b21_4264	f0f6386fb62ec3a09e34ad652cf53efb_5336	S_aureus_10_02343
WP_045177662.1		formate/nitrite transporter family protein	4	4	1	1	992				824	824	824	0c5d6aed1d23427ac77815eabcecea75_4991	c4610aa9a2d5bacd833356b3605d9b21_4988	f0f6386fb62ec3a09e34ad652cf53efb_4606	S_aureus_10_01459
WP_001100526.1		ketoacyl-ACP synthase III	4	4	1	1	2488				941	941	941	0c5d6aed1d23427ac77815eabcecea75_1794	c4610aa9a2d5bacd833356b3605d9b21_1782	f0f6386fb62ec3a09e34ad652cf53efb_2191	S_aureus_10_00407
WP_000175846.1		PLP-dependent aspartate aminotransferase family protein	4	4	1	1	207				1160	1160	1160	0c5d6aed1d23427ac77815eabcecea75_675	c4610aa9a2d5bacd833356b3605d9b21_669	f0f6386fb62ec3a09e34ad652cf53efb_3308	S_aureus_10_00829
yidD		membrane protein insertion efficiency factor YidD	4	4	1	1	1381				257	257	257	0c5d6aed1d23427ac77815eabcecea75_3478	c4610aa9a2d5bacd833356b3605d9b21_3471	f0f6386fb62ec3a09e34ad652cf53efb_499	S_aureus_10_02047
rpmF		50S ribosomal protein L32	4	4	1	1	2635				173	173	173	0c5d6aed1d23427ac77815eabcecea75_2096	c4610aa9a2d5bacd833356b3605d9b21_2085	f0f6386fb62ec3a09e34ad652cf53efb_1889	S_aureus_10_00266
cyoE		heme o synthase	4	4	1	1	2624				911	911	911	0c5d6aed1d23427ac77815eabcecea75_2074	c4610aa9a2d5bacd833356b3605d9b21_2063	f0f6386fb62ec3a09e34ad652cf53efb_1911	S_aureus_10_00277
WP_000069098.1		NAD(P)H-dependent oxidoreductase	4	4	1	1	869				671	671	671	0c5d6aed1d23427ac77815eabcecea75_5249	c4610aa9a2d5bacd833356b3605d9b21_5246	f0f6386fb62ec3a09e34ad652cf53efb_4350	S_aureus_10_01341
WP_001801792.1		ATP synthase subunit I	4	4	1	1	1735				353	452	427	0c5d6aed1d23427ac77815eabcecea75_4381	c4610aa9a2d5bacd833356b3605d9b21_4380	f0f6386fb62ec3a09e34ad652cf53efb_5220	S_aureus_10_02231
rpsQ		30S ribosomal protein S17	4	4	1	1	1853				263	263	263	0c5d6aed1d23427ac77815eabcecea75_4656	c4610aa9a2d5bacd833356b3605d9b21_4651	f0f6386fb62ec3a09e34ad652cf53efb_4941	S_aureus_10_01834
WP_000192168.1		fructose-1,6-bisphosphatase	4	4	1	1	876				1964	1964	1964	0c5d6aed1d23427ac77815eabcecea75_5235	c4610aa9a2d5bacd833356b3605d9b21_5232	f0f6386fb62ec3a09e34ad652cf53efb_4364	S_aureus_10_01348
WP_045178182.1		NAD(P)/FAD-dependent oxidoreductase	4	4	1	1	427				1493	1493	1493	0c5d6aed1d23427ac77815eabcecea75_5337	c4610aa9a2d5bacd833356b3605d9b21_5334	f0f6386fb62ec3a09e34ad652cf53efb_4262	S_aureus_10_01299
WP_045178269.1		GntR family transcriptional regulator	4	4	1	1	802				704	704	704	0c5d6aed1d23427ac77815eabcecea75_473	c4610aa9a2d5bacd833356b3605d9b21_469	f0f6386fb62ec3a09e34ad652cf53efb_3514	S_aureus_10_00926
WP_000730034.1		SDR family oxidoreductase	4	4	1	1	1942				881	881	881	0c5d6aed1d23427ac77815eabcecea75_4837	c4610aa9a2d5bacd833356b3605d9b21_4832	f0f6386fb62ec3a09e34ad652cf53efb_4760	S_aureus_10_01919
WP_000940129.1		GNAT family N-acetyltransferase	4	4	1	1	2254				506	506	506	0c5d6aed1d23427ac77815eabcecea75_1313	c4610aa9a2d5bacd833356b3605d9b21_1303	f0f6386fb62ec3a09e34ad652cf53efb_2670	S_aureus_10_00636
WP_001228169.1		alpha/beta hydrolase	4	4	1	1	398				968	968	968	0c5d6aed1d23427ac77815eabcecea75_5277	c4610aa9a2d5bacd833356b3605d9b21_5274	f0f6386fb62ec3a09e34ad652cf53efb_4322	S_aureus_10_01328
mepR		multidrug efflux transporter transcriptional repressor MepR	4	4	1	1	315				419	419	419	0c5d6aed1d23427ac77815eabcecea75_625	c4610aa9a2d5bacd833356b3605d9b21_619	f0f6386fb62ec3a09e34ad652cf53efb_3358	S_aureus_10_00854
WP_000205307.1		hypothetical protein	4	4	1	1	1932				185	185	185	0c5d6aed1d23427ac77815eabcecea75_4816	c4610aa9a2d5bacd833356b3605d9b21_4811	f0f6386fb62ec3a09e34ad652cf53efb_4781	S_aureus_10_01909
WP_000971550.1		pyridoxal phosphate-dependent aminotransferase family protein	4	4	1	1	969				1115	1115	1115	0c5d6aed1d23427ac77815eabcecea75_5041	c4610aa9a2d5bacd833356b3605d9b21_5036	f0f6386fb62ec3a09e34ad652cf53efb_4556	S_aureus_10_01437
WP_000379892.1		threonylcarbamoyl-AMP synthase	4	4	1	1	1741				1046	1097	1058	0c5d6aed1d23427ac77815eabcecea75_4393	c4610aa9a2d5bacd833356b3605d9b21_4392	f0f6386fb62ec3a09e34ad652cf53efb_5208	S_aureus_10_02225
WP_001173165.1		cation:dicarboxylase symporter family transporter	4	4	1	1	1011				1277	1277	1277	0c5d6aed1d23427ac77815eabcecea75_4953	c4610aa9a2d5bacd833356b3605d9b21_4950	f0f6386fb62ec3a09e34ad652cf53efb_4644	S_aureus_10_01478
WP_000711870.1		BCCT family transporter	4	4	1	1	475				1622	1622	1622	0c5d6aed1d23427ac77815eabcecea75_5437	c4610aa9a2d5bacd833356b3605d9b21_5434	f0f6386fb62ec3a09e34ad652cf53efb_4162	S_aureus_10_01252
parC		DNA topoisomerase IV subunit A	4	4	1	1	2008				2402	2402	2402	0c5d6aed1d23427ac77815eabcecea75_2583	c4610aa9a2d5bacd833356b3605d9b21_2576	f0f6386fb62ec3a09e34ad652cf53efb_1396	S_aureus_10_00033
ribE		6,7-dimethyl-8-ribityllumazine synthase	4	4	1	1	1357				464	464	464	0c5d6aed1d23427ac77815eabcecea75_3428	c4610aa9a2d5bacd833356b3605d9b21_3421	f0f6386fb62ec3a09e34ad652cf53efb_549	S_aureus_10_02023
WP_000184370.1		penicillin-binding protein	4	4	1	1	1317				905	905	905	0c5d6aed1d23427ac77815eabcecea75_3348	c4610aa9a2d5bacd833356b3605d9b21_3341	f0f6386fb62ec3a09e34ad652cf53efb_629	S_aureus_10_01988
thiE		thiamine phosphate synthase	4	4	1	1	1717				641	641	641	0c5d6aed1d23427ac77815eabcecea75_4342	c4610aa9a2d5bacd833356b3605d9b21_4341	f0f6386fb62ec3a09e34ad652cf53efb_5259	S_aureus_10_02249
WP_045176554.1		ABC transporter permease	4	4	1	1	1034				1055	1055	1055	0c5d6aed1d23427ac77815eabcecea75_4907	c4610aa9a2d5bacd833356b3605d9b21_4904	f0f6386fb62ec3a09e34ad652cf53efb_4690	S_aureus_10_01500
WP_001167158.1		N-acetyltransferase	4	4	1	1	2387				530	530	530	0c5d6aed1d23427ac77815eabcecea75_1591	c4610aa9a2d5bacd833356b3605d9b21_1577	f0f6386fb62ec3a09e34ad652cf53efb_2394	S_aureus_10_00507
WP_000568351.1		thiamine pyrophosphate-dependent dehydrogenase E1 component subunit alpha	4	4	1	1	1114				992	992	992	0c5d6aed1d23427ac77815eabcecea75_2924	c4610aa9a2d5bacd833356b3605d9b21_2918	f0f6386fb62ec3a09e34ad652cf53efb_1053	S_aureus_10_01612
rpoZ		DNA-directed RNA polymerase subunit omega	4	4	1	1	2715				218	218	218	0c5d6aed1d23427ac77815eabcecea75_2269	c4610aa9a2d5bacd833356b3605d9b21_2256	f0f6386fb62ec3a09e34ad652cf53efb_1712	S_aureus_10_00185
WP_001793365.1		DeoR/GlpR family DNA-binding transcription regulator	4	4	1	1	1817				755	791	782	0c5d6aed1d23427ac77815eabcecea75_4578	c4610aa9a2d5bacd833356b3605d9b21_4577	f0f6386fb62ec3a09e34ad652cf53efb_5019	S_aureus_10_01800
WP_000593417.1		ABC transporter permease	4	4	1	1	2499				962	962	962	0c5d6aed1d23427ac77815eabcecea75_1816	c4610aa9a2d5bacd833356b3605d9b21_1804	f0f6386fb62ec3a09e34ad652cf53efb_2169	S_aureus_10_00396
WP_000724887.1		EMYY motif lipoprotein	4	4	1	1	2337				878	878	878	0c5d6aed1d23427ac77815eabcecea75_1487	c4610aa9a2d5bacd833356b3605d9b21_1475	f0f6386fb62ec3a09e34ad652cf53efb_2496	S_aureus_10_00554
WP_000389534.1		tetratricopeptide repeat protein	4	4	1	1	277				1244	1244	1244	0c5d6aed1d23427ac77815eabcecea75_2811	c4610aa9a2d5bacd833356b3605d9b21_2805	f0f6386fb62ec3a09e34ad652cf53efb_1170	S_aureus_10_01559
WP_000136491.1		sugar O-acetyltransferase	4	4	1	1	419				599	599	599	0c5d6aed1d23427ac77815eabcecea75_5319	c4610aa9a2d5bacd833356b3605d9b21_5316	f0f6386fb62ec3a09e34ad652cf53efb_4280	S_aureus_10_01308
WP_001557152.1		YojF family protein	4	4	1	1	2168				362	362	362	0c5d6aed1d23427ac77815eabcecea75_1133	c4610aa9a2d5bacd833356b3605d9b21_1127	f0f6386fb62ec3a09e34ad652cf53efb_2850	S_aureus_10_00722
rpoB		DNA-directed RNA polymerase subunit beta	4	4	1	1	37				3551	3551	3551	0c5d6aed1d23427ac77815eabcecea75_1081	c4610aa9a2d5bacd833356b3605d9b21_1075	f0f6386fb62ec3a09e34ad652cf53efb_2902	S_aureus_10_00749
secA		preprotein translocase subunit SecA	4	4	1	1	2350				2531	2531	2531	0c5d6aed1d23427ac77815eabcecea75_1513	c4610aa9a2d5bacd833356b3605d9b21_1501	f0f6386fb62ec3a09e34ad652cf53efb_2470	S_aureus_10_00541
WP_000634175.1		universal stress protein	4	4	1	1	1296				500	500	500	0c5d6aed1d23427ac77815eabcecea75_3306	c4610aa9a2d5bacd833356b3605d9b21_3299	f0f6386fb62ec3a09e34ad652cf53efb_671	S_aureus_10_01969
hrcA		heat-inducible transcriptional repressor HrcA	4	4	1	1	1179				977	977	977	0c5d6aed1d23427ac77815eabcecea75_3055	c4610aa9a2d5bacd833356b3605d9b21_3049	f0f6386fb62ec3a09e34ad652cf53efb_922	S_aureus_10_01675
WP_001570807.1		DUF1514 family protein	4	4	1	1	1085				200	200	200	0c5d6aed1d23427ac77815eabcecea75_4111	c4610aa9a2d5bacd833356b3605d9b21_4110	f0f6386fb62ec3a09e34ad652cf53efb_5490	S_aureus_10_02170
pchA		isochorismate synthase MenF	4	4	1	1	2549				1211	1361	1307	0c5d6aed1d23427ac77815eabcecea75_1923	c4610aa9a2d5bacd833356b3605d9b21_1910	f0f6386fb62ec3a09e34ad652cf53efb_2062	S_aureus_10_00349
WP_000739224.1		N-acetylglucosaminidase	4	4	1	1	1919				638	776	741	0c5d6aed1d23427ac77815eabcecea75_4790	c4610aa9a2d5bacd833356b3605d9b21_4785	f0f6386fb62ec3a09e34ad652cf53efb_4807	S_aureus_10_01897
WP_000646203.1		zinc-binding dehydrogenase	4	4	1	1	786				1055	1055	1055	0c5d6aed1d23427ac77815eabcecea75_441	c4610aa9a2d5bacd833356b3605d9b21_437	f0f6386fb62ec3a09e34ad652cf53efb_3546	S_aureus_10_00942
glpT		glycerol-3-phosphate transporter	4	4	1	1	312				1358	1358	1358	0c5d6aed1d23427ac77815eabcecea75_631	c4610aa9a2d5bacd833356b3605d9b21_625	f0f6386fb62ec3a09e34ad652cf53efb_3352	S_aureus_10_00851
WP_000517187.1		ABC transporter substrate-binding protein	4	4	1	1	2496				1715	1715	1715	0c5d6aed1d23427ac77815eabcecea75_1810	c4610aa9a2d5bacd833356b3605d9b21_1798	f0f6386fb62ec3a09e34ad652cf53efb_2175	S_aureus_10_00399
WP_000794408.1		GTP-binding protein	4	4	1	1	2284				926	926	926	0c5d6aed1d23427ac77815eabcecea75_1375	c4610aa9a2d5bacd833356b3605d9b21_1365	f0f6386fb62ec3a09e34ad652cf53efb_2608	S_aureus_10_00606
WP_000240920.1		CDP-glycerol glycerophosphotransferase family protein	4	4	1	1	795				1688	1688	1688	0c5d6aed1d23427ac77815eabcecea75_459	c4610aa9a2d5bacd833356b3605d9b21_455	f0f6386fb62ec3a09e34ad652cf53efb_3528	S_aureus_10_00933
cmk		(d)CMP kinase	4	4	1	1	262				659	659	659	0c5d6aed1d23427ac77815eabcecea75_2841	c4610aa9a2d5bacd833356b3605d9b21_2835	f0f6386fb62ec3a09e34ad652cf53efb_1140	S_aureus_10_01572
purD		phosphoribosylamine--glycine ligase	4	4	1	1	2581				1247	1247	1247	0c5d6aed1d23427ac77815eabcecea75_1989	c4610aa9a2d5bacd833356b3605d9b21_1976	f0f6386fb62ec3a09e34ad652cf53efb_1996	S_aureus_10_00318
WP_001124513.1		CoA-disulfide reductase	4	4	1	1	2476				1316	1316	1316	0c5d6aed1d23427ac77815eabcecea75_1770	c4610aa9a2d5bacd833356b3605d9b21_1758	f0f6386fb62ec3a09e34ad652cf53efb_2215	S_aureus_10_00419
hemH		ferrochelatase	4	4	1	1	1547				923	923	923	0c5d6aed1d23427ac77815eabcecea75_3718	c4610aa9a2d5bacd833356b3605d9b21_3717	f0f6386fb62ec3a09e34ad652cf53efb_389	S_aureus_10_02455
WP_000678232.1		SDR family oxidoreductase	4	4	1	1	234				755	755	755	0c5d6aed1d23427ac77815eabcecea75_2892	c4610aa9a2d5bacd833356b3605d9b21_2886	f0f6386fb62ec3a09e34ad652cf53efb_1085	S_aureus_10_01597
WP_000831055.1		LCP family protein	4	4	1	1	1923				923	947	941	0c5d6aed1d23427ac77815eabcecea75_4798	c4610aa9a2d5bacd833356b3605d9b21_4793	f0f6386fb62ec3a09e34ad652cf53efb_4799	S_aureus_10_01901
rpsU		30S ribosomal protein S21	4	4	1	1	1172				176	176	176	0c5d6aed1d23427ac77815eabcecea75_3041	c4610aa9a2d5bacd833356b3605d9b21_3035	f0f6386fb62ec3a09e34ad652cf53efb_936	S_aureus_10_01668
WP_001287079.1		hypothetical protein	4	4	1	1	1700				479	479	479	0c5d6aed1d23427ac77815eabcecea75_4308	c4610aa9a2d5bacd833356b3605d9b21_4307	f0f6386fb62ec3a09e34ad652cf53efb_5293	S_aureus_10_02265
WP_000514290.1		TrkA family potassium uptake protein	4	4	1	1	2595				662	662	662	0c5d6aed1d23427ac77815eabcecea75_2016	c4610aa9a2d5bacd833356b3605d9b21_2005	f0f6386fb62ec3a09e34ad652cf53efb_1969	S_aureus_10_00304
WP_000208558.1		serine hydrolase	4	4	1	1	952				1496	1496	1496	0c5d6aed1d23427ac77815eabcecea75_5077	c4610aa9a2d5bacd833356b3605d9b21_5072	f0f6386fb62ec3a09e34ad652cf53efb_4520	S_aureus_10_01421
WP_000448913.1		alpha/beta hydrolase	4	4	1	1	443				830	830	830	0c5d6aed1d23427ac77815eabcecea75_5369	c4610aa9a2d5bacd833356b3605d9b21_5366	f0f6386fb62ec3a09e34ad652cf53efb_4230	S_aureus_10_01284
sigS		RNA polymerase sigma factor SigS	4	4	1	1	1367				470	470	470	0c5d6aed1d23427ac77815eabcecea75_3449	c4610aa9a2d5bacd833356b3605d9b21_3442	f0f6386fb62ec3a09e34ad652cf53efb_528	S_aureus_10_02033
WP_045176953.1		peptide ABC transporter substrate-binding protein	4	4	1	1	2495				1667	1667	1667	0c5d6aed1d23427ac77815eabcecea75_1808	c4610aa9a2d5bacd833356b3605d9b21_1796	f0f6386fb62ec3a09e34ad652cf53efb_2177	S_aureus_10_00400
rocD		ornithine--oxo-acid transaminase	4	4	1	1	729				1184	1184	1184	0c5d6aed1d23427ac77815eabcecea75_321	c4610aa9a2d5bacd833356b3605d9b21_317	f0f6386fb62ec3a09e34ad652cf53efb_3672	S_aureus_10_00998
WP_000163541.1		aspartate-semialdehyde dehydrogenase	4	4	1	1	835				989	989	989	0c5d6aed1d23427ac77815eabcecea75_2664	c4610aa9a2d5bacd833356b3605d9b21_2656	f0f6386fb62ec3a09e34ad652cf53efb_1317	S_aureus_10_02615
WP_000757881.1		LacI family transcriptional regulator	4	4	1	1	810				998	998	998	0c5d6aed1d23427ac77815eabcecea75_489	c4610aa9a2d5bacd833356b3605d9b21_485	f0f6386fb62ec3a09e34ad652cf53efb_3498	S_aureus_10_00919
hutU		urocanate hydratase	4	4	1	1	1945				1661	1736	1679	0c5d6aed1d23427ac77815eabcecea75_4843	c4610aa9a2d5bacd833356b3605d9b21_4838	f0f6386fb62ec3a09e34ad652cf53efb_4754	S_aureus_10_01922
WP_000831695.1		CamS family sex pheromone protein	4	4	1	1	1474				1199	1199	1199	0c5d6aed1d23427ac77815eabcecea75_3961	c4610aa9a2d5bacd833356b3605d9b21_3960	f0f6386fb62ec3a09e34ad652cf53efb_143	S_aureus_10_02105
WP_000401414.1		YuzD family protein	4	4	1	1	2443				323	323	323	0c5d6aed1d23427ac77815eabcecea75_1704	c4610aa9a2d5bacd833356b3605d9b21_1692	f0f6386fb62ec3a09e34ad652cf53efb_2281	S_aureus_10_00452
group_1322	ald	alanine dehydrogenase	4	4	1	1	301				1118	1118	1118	0c5d6aed1d23427ac77815eabcecea75_2760	c4610aa9a2d5bacd833356b3605d9b21_2754	f0f6386fb62ec3a09e34ad652cf53efb_1221	S_aureus_10_01535
mnmA		tRNA 2-thiouridine(34) synthase MnmA	4	4	1	1	1215				1118	1118	1118	0c5d6aed1d23427ac77815eabcecea75_3129	c4610aa9a2d5bacd833356b3605d9b21_3123	f0f6386fb62ec3a09e34ad652cf53efb_848	S_aureus_10_01713
icaC		polysaccharide intercellular adhesin biosynthesis/export protein IcaC	4	4	1	1	536				1052	1052	1052	0c5d6aed1d23427ac77815eabcecea75_5561	c4610aa9a2d5bacd833356b3605d9b21_5558	f0f6386fb62ec3a09e34ad652cf53efb_4038	S_aureus_10_01196
WP_000790325.1		LacI family DNA-binding transcriptional regulator	4	4	1	1	1665				950	950	950	0c5d6aed1d23427ac77815eabcecea75_4223	c4610aa9a2d5bacd833356b3605d9b21_4222	f0f6386fb62ec3a09e34ad652cf53efb_5378	S_aureus_10_02324
pyk		pyruvate kinase	4	4	1	1	1284				1757	1757	1757	0c5d6aed1d23427ac77815eabcecea75_3280	c4610aa9a2d5bacd833356b3605d9b21_3273	f0f6386fb62ec3a09e34ad652cf53efb_697	S_aureus_10_01957
uvrB		excinuclease ABC subunit UvrB	4	4	1	1	2358				1985	1985	1985	0c5d6aed1d23427ac77815eabcecea75_1528	c4610aa9a2d5bacd833356b3605d9b21_1516	f0f6386fb62ec3a09e34ad652cf53efb_2455	S_aureus_10_00536
rpsL		30S ribosomal protein S12	4	4	1	1	34				413	413	413	0c5d6aed1d23427ac77815eabcecea75_1087	c4610aa9a2d5bacd833356b3605d9b21_1081	f0f6386fb62ec3a09e34ad652cf53efb_2896	S_aureus_10_00746
cntK		histidine racemase CntK	4	4	1	1	922				821	821	821	0c5d6aed1d23427ac77815eabcecea75_5137	c4610aa9a2d5bacd833356b3605d9b21_5132	f0f6386fb62ec3a09e34ad652cf53efb_4460	S_aureus_10_01393
WP_000241596.1		GNAT family N-acetyltransferase	4	4	1	1	1023				335	401	368	0c5d6aed1d23427ac77815eabcecea75_4929	c4610aa9a2d5bacd833356b3605d9b21_4926	f0f6386fb62ec3a09e34ad652cf53efb_4668	S_aureus_10_01489
WP_000819843.1		DUF4467 domain-containing protein	4	4	1	1	984				362	362	362	0c5d6aed1d23427ac77815eabcecea75_5009	c4610aa9a2d5bacd833356b3605d9b21_5004	f0f6386fb62ec3a09e34ad652cf53efb_4588	S_aureus_10_01452
WP_045177947.1		aldo/keto reductase	4	4	1	1	2300				839	839	839	0c5d6aed1d23427ac77815eabcecea75_1407	c4610aa9a2d5bacd833356b3605d9b21_1397	f0f6386fb62ec3a09e34ad652cf53efb_2576	S_aureus_10_00590
WP_000032657.1		NUDIX domain-containing protein	4	4	1	1	1264				608	608	608	0c5d6aed1d23427ac77815eabcecea75_3236	c4610aa9a2d5bacd833356b3605d9b21_3230	f0f6386fb62ec3a09e34ad652cf53efb_741	S_aureus_10_01759
WP_001028786.1		antibiotic biosynthesis monooxygenase	4	4	1	1	469				443	443	443	0c5d6aed1d23427ac77815eabcecea75_5423	c4610aa9a2d5bacd833356b3605d9b21_5420	f0f6386fb62ec3a09e34ad652cf53efb_4176	S_aureus_10_01258
nirD		nitrite reductase small subunit NirD	4	4	1	1	996				314	314	314	0c5d6aed1d23427ac77815eabcecea75_4983	c4610aa9a2d5bacd833356b3605d9b21_4980	f0f6386fb62ec3a09e34ad652cf53efb_4614	S_aureus_10_01463
WP_000215724.1		4'-phosphopantetheinyl transferase superfamily protein	4	4	1	1	724				644	644	644	0c5d6aed1d23427ac77815eabcecea75_311	c4610aa9a2d5bacd833356b3605d9b21_307	f0f6386fb62ec3a09e34ad652cf53efb_3682	S_aureus_10_01003
WP_000141416.1		sucrose-6-phosphate hydrolase	4	4	1	1	1664				1484	1484	1484	0c5d6aed1d23427ac77815eabcecea75_4221	c4610aa9a2d5bacd833356b3605d9b21_4220	f0f6386fb62ec3a09e34ad652cf53efb_5380	S_aureus_10_02323
WP_000289213.1		MarR family transcriptional regulator	4	4	1	1	1009				446	446	446	0c5d6aed1d23427ac77815eabcecea75_4957	c4610aa9a2d5bacd833356b3605d9b21_4954	f0f6386fb62ec3a09e34ad652cf53efb_4640	S_aureus_10_01476
WP_000737686.1		hypothetical protein	4	4	1	1	1127				581	581	581	0c5d6aed1d23427ac77815eabcecea75_2950	c4610aa9a2d5bacd833356b3605d9b21_2944	f0f6386fb62ec3a09e34ad652cf53efb_1027	S_aureus_10_01625
WP_000606334.1		Na+/H+ antiporter family protein	4	4	1	1	2449				1316	1316	1316	0c5d6aed1d23427ac77815eabcecea75_1716	c4610aa9a2d5bacd833356b3605d9b21_1704	f0f6386fb62ec3a09e34ad652cf53efb_2269	S_aureus_10_00446
narJ		nitrate reductase molybdenum cofactor assembly chaperone	4	4	1	1	1000				575	590	578	0c5d6aed1d23427ac77815eabcecea75_4975	c4610aa9a2d5bacd833356b3605d9b21_4972	f0f6386fb62ec3a09e34ad652cf53efb_4622	S_aureus_10_01467
thrB		homoserine kinase	4	4	1	1	2033				914	914	914	0c5d6aed1d23427ac77815eabcecea75_2529	c4610aa9a2d5bacd833356b3605d9b21_2522	f0f6386fb62ec3a09e34ad652cf53efb_1450	S_aureus_10_00057
WP_000433551.1		ABC transporter ATP-binding protein	4	4	1	1	2607				1094	1094	1094	0c5d6aed1d23427ac77815eabcecea75_2040	c4610aa9a2d5bacd833356b3605d9b21_2029	f0f6386fb62ec3a09e34ad652cf53efb_1945	S_aureus_10_00293
fetB		iron export ABC transporter permease subunit FetB	4	4	1	1	938				776	776	776	0c5d6aed1d23427ac77815eabcecea75_5105	c4610aa9a2d5bacd833356b3605d9b21_5100	f0f6386fb62ec3a09e34ad652cf53efb_4492	S_aureus_10_01409
group_1343	deoC	deoxyribose-phosphate aldolase	4	4	1	1	683				662	662	662	0c5d6aed1d23427ac77815eabcecea75_229	c4610aa9a2d5bacd833356b3605d9b21_225	f0f6386fb62ec3a09e34ad652cf53efb_3764	S_aureus_10_01044
thiD		bifunctional hydroxymethylpyrimidine kinase/phosphomethylpyrimidine kinase	4	4	1	1	1719				830	830	830	0c5d6aed1d23427ac77815eabcecea75_4346	c4610aa9a2d5bacd833356b3605d9b21_4345	f0f6386fb62ec3a09e34ad652cf53efb_5255	S_aureus_10_02247
WP_000761341.1		helix-turn-helix domain-containing protein	4	4	1	2	4				341	341	341	0c5d6aed1d23427ac77815eabcecea75_5688	c4610aa9a2d5bacd833356b3605d9b21_5665	f0f6386fb62ec3a09e34ad652cf53efb_5539	S_aureus_10_02601
WP_000167978.1		CDP-glycerol glycerophosphotransferase family protein	4	4	1	1	791				1694	1694	1694	0c5d6aed1d23427ac77815eabcecea75_451	c4610aa9a2d5bacd833356b3605d9b21_447	f0f6386fb62ec3a09e34ad652cf53efb_3536	S_aureus_10_00937
WP_000905625.1		hypothetical protein	4	4	1	1	2048				197	197	197	0c5d6aed1d23427ac77815eabcecea75_2499	c4610aa9a2d5bacd833356b3605d9b21_2492	f0f6386fb62ec3a09e34ad652cf53efb_1480	S_aureus_10_00072
WP_000180673.1		2-oxoglutarate dehydrogenase E1 component	4	4	1	1	824				2798	2798	2798	0c5d6aed1d23427ac77815eabcecea75_2706	c4610aa9a2d5bacd833356b3605d9b21_2698	f0f6386fb62ec3a09e34ad652cf53efb_1275	S_aureus_10_01509
nagB		glucosamine-6-phosphate deaminase	4	4	1	1	2169				758	758	758	0c5d6aed1d23427ac77815eabcecea75_1135	c4610aa9a2d5bacd833356b3605d9b21_1129	f0f6386fb62ec3a09e34ad652cf53efb_2848	S_aureus_10_00721
hlgA		bi-component gamma-hemolysin HlgAB subunit A	4	4	1	1	973				929	965	938	0c5d6aed1d23427ac77815eabcecea75_5031	c4610aa9a2d5bacd833356b3605d9b21_5026	f0f6386fb62ec3a09e34ad652cf53efb_4566	S_aureus_10_01442
WP_045177691.1		ATP-binding cassette domain-containing protein	4	4	1	1	937				662	662	662	0c5d6aed1d23427ac77815eabcecea75_5107	c4610aa9a2d5bacd833356b3605d9b21_5102	f0f6386fb62ec3a09e34ad652cf53efb_4490	S_aureus_10_01408
WP_000764423.1		class I SAM-dependent methyltransferase	4	4	1	1	1352				563	563	563	0c5d6aed1d23427ac77815eabcecea75_3418	c4610aa9a2d5bacd833356b3605d9b21_3411	f0f6386fb62ec3a09e34ad652cf53efb_559	S_aureus_10_02019
WP_001147967.1		PTS ascorbate transporter subunit IIC	4	4	1	1	319				1346	1346	1346	0c5d6aed1d23427ac77815eabcecea75_617	c4610aa9a2d5bacd833356b3605d9b21_611	f0f6386fb62ec3a09e34ad652cf53efb_3366	S_aureus_10_00858
WP_001245802.1		hypothetical protein	4	4	1	1	2679				188	188	188	0c5d6aed1d23427ac77815eabcecea75_2190	c4610aa9a2d5bacd833356b3605d9b21_2179	f0f6386fb62ec3a09e34ad652cf53efb_1795	S_aureus_10_00224
WP_000234068.1		CvpA family protein	4	4	1	1	2650				521	521	521	0c5d6aed1d23427ac77815eabcecea75_2126	c4610aa9a2d5bacd833356b3605d9b21_2115	f0f6386fb62ec3a09e34ad652cf53efb_1859	S_aureus_10_00252
WP_001031882.1		L-lactate dehydrogenase	4	4	1	1	779				953	953	953	0c5d6aed1d23427ac77815eabcecea75_425	c4610aa9a2d5bacd833356b3605d9b21_421	f0f6386fb62ec3a09e34ad652cf53efb_3562	S_aureus_10_00949
ald		alanine dehydrogenase	4	4	1	1	1295				1118	1118	1118	0c5d6aed1d23427ac77815eabcecea75_3304	c4610aa9a2d5bacd833356b3605d9b21_3297	f0f6386fb62ec3a09e34ad652cf53efb_673	S_aureus_10_01968
mreD		rod shape-determining protein MreD	4	4	1	1	1241				530	530	530	0c5d6aed1d23427ac77815eabcecea75_3187	c4610aa9a2d5bacd833356b3605d9b21_3181	f0f6386fb62ec3a09e34ad652cf53efb_790	S_aureus_10_01739
WP_000160904.1		undecaprenyldiphospho-muramoylpentapeptide beta-N-acetylglucosaminyltransferase	4	4	1	1	820				1070	1070	1070	0c5d6aed1d23427ac77815eabcecea75_2718	c4610aa9a2d5bacd833356b3605d9b21_2710	f0f6386fb62ec3a09e34ad652cf53efb_1263	S_aureus_10_01513
WP_001059079.1		cold-shock protein	4	4	1	1	569				200	200	200	0c5d6aed1d23427ac77815eabcecea75_5625	c4610aa9a2d5bacd833356b3605d9b21_5624	f0f6386fb62ec3a09e34ad652cf53efb_3974	S_aureus_10_01163
WP_001792493.1		phospho-sugar mutase	4	4	1	1	900				1637	1808	1765	0c5d6aed1d23427ac77815eabcecea75_5185	c4610aa9a2d5bacd833356b3605d9b21_5180	f0f6386fb62ec3a09e34ad652cf53efb_4414	S_aureus_10_01371
typA		translational GTPase TypA	4	4	1	1	2617				1847	1847	1847	0c5d6aed1d23427ac77815eabcecea75_2060	c4610aa9a2d5bacd833356b3605d9b21_2049	f0f6386fb62ec3a09e34ad652cf53efb_1925	S_aureus_10_00283
WP_000886005.1		DUF1398 family protein	4	4	1	1	217				389	389	389	0c5d6aed1d23427ac77815eabcecea75_655	c4610aa9a2d5bacd833356b3605d9b21_649	f0f6386fb62ec3a09e34ad652cf53efb_3328	S_aureus_10_00839
WP_000367064.1		sugar efflux transporter	4	4	1	1	2270				1220	1220	1220	0c5d6aed1d23427ac77815eabcecea75_1347	c4610aa9a2d5bacd833356b3605d9b21_1337	f0f6386fb62ec3a09e34ad652cf53efb_2636	S_aureus_10_00620
WP_000216874.1		ABC transporter ATP-binding protein	4	4	1	1	1542				740	740	740	0c5d6aed1d23427ac77815eabcecea75_3728	c4610aa9a2d5bacd833356b3605d9b21_3727	f0f6386fb62ec3a09e34ad652cf53efb_379	S_aureus_10_02451
ureE		urease accessory protein UreE	4	4	1	1	1903				452	452	452	0c5d6aed1d23427ac77815eabcecea75_4758	c4610aa9a2d5bacd833356b3605d9b21_4753	f0f6386fb62ec3a09e34ad652cf53efb_4839	S_aureus_10_01882
WP_000171798.1		hypothetical protein	4	4	1	1	1980				344	344	344	0c5d6aed1d23427ac77815eabcecea75_2639	c4610aa9a2d5bacd833356b3605d9b21_2632	f0f6386fb62ec3a09e34ad652cf53efb_1340	S_aureus_10_00007
rsp		AraC family transcriptional regulator Rsp	4	4	1	1	1014				2105	2105	2105	0c5d6aed1d23427ac77815eabcecea75_4947	c4610aa9a2d5bacd833356b3605d9b21_4944	f0f6386fb62ec3a09e34ad652cf53efb_4650	S_aureus_10_01481
WP_072384919.1		BsaG protein	4	4	1	1	1411				698	698	698	0c5d6aed1d23427ac77815eabcecea75_3536	c4610aa9a2d5bacd833356b3605d9b21_3531	f0f6386fb62ec3a09e34ad652cf53efb_443	S_aureus_10_02352
cwrA		cell wall inhibition responsive protein CwrA	4	4	1	1	420				191	191	191	0c5d6aed1d23427ac77815eabcecea75_5321	c4610aa9a2d5bacd833356b3605d9b21_5318	f0f6386fb62ec3a09e34ad652cf53efb_4278	S_aureus_10_01307
cntM		staphylopine dehydrogenase CntM	4	4	1	1	924				1304	1304	1304	0c5d6aed1d23427ac77815eabcecea75_5133	c4610aa9a2d5bacd833356b3605d9b21_5128	f0f6386fb62ec3a09e34ad652cf53efb_4464	S_aureus_10_01395
WP_010956661.1		hypothetical protein	4	4	1	1	897				170	233	217	0c5d6aed1d23427ac77815eabcecea75_5191	c4610aa9a2d5bacd833356b3605d9b21_5186	f0f6386fb62ec3a09e34ad652cf53efb_4408	S_aureus_10_01368
WP_001049150.1		YlbG family protein	4	4	1	1	2629				254	254	254	0c5d6aed1d23427ac77815eabcecea75_2084	c4610aa9a2d5bacd833356b3605d9b21_2073	f0f6386fb62ec3a09e34ad652cf53efb_1901	S_aureus_10_00272
hisD		histidinol dehydrogenase	4	4	1	1	544				1250	1250	1250	0c5d6aed1d23427ac77815eabcecea75_5577	c4610aa9a2d5bacd833356b3605d9b21_5576	f0f6386fb62ec3a09e34ad652cf53efb_4022	S_aureus_10_01188
WP_000872158.1		DUF177 domain-containing protein	4	4	1	1	2634				557	557	557	0c5d6aed1d23427ac77815eabcecea75_2094	c4610aa9a2d5bacd833356b3605d9b21_2083	f0f6386fb62ec3a09e34ad652cf53efb_1891	S_aureus_10_00267
femA		glycine glycyltransferase FemA	4	4	1	1	1989				1262	1262	1262	0c5d6aed1d23427ac77815eabcecea75_2621	c4610aa9a2d5bacd833356b3605d9b21_2614	f0f6386fb62ec3a09e34ad652cf53efb_1358	S_aureus_10_00015
WP_000011823.1		hypothetical protein	4	4	1	1	2038				854	854	854	0c5d6aed1d23427ac77815eabcecea75_2519	c4610aa9a2d5bacd833356b3605d9b21_2512	f0f6386fb62ec3a09e34ad652cf53efb_1460	S_aureus_10_00062
WP_000736082.1		sugar transferase	4	4	1	1	674				692	692	692	0c5d6aed1d23427ac77815eabcecea75_209	c4610aa9a2d5bacd833356b3605d9b21_207	f0f6386fb62ec3a09e34ad652cf53efb_3784	S_aureus_10_01054
sucD		succinate--CoA ligase subunit alpha	4	4	1	1	2128				908	908	908	0c5d6aed1d23427ac77815eabcecea75_2341	c4610aa9a2d5bacd833356b3605d9b21_2328	f0f6386fb62ec3a09e34ad652cf53efb_1640	S_aureus_10_00149
WP_000939496.1		hypothetical protein	4	4	1	1	1633				140	140	140	0c5d6aed1d23427ac77815eabcecea75_4159	c4610aa9a2d5bacd833356b3605d9b21_4158	f0f6386fb62ec3a09e34ad652cf53efb_5442	S_aureus_10_02292
WP_001621913.1		hypothetical protein	4	4	1	1	881				203	203	203	0c5d6aed1d23427ac77815eabcecea75_5223	c4610aa9a2d5bacd833356b3605d9b21_5220	f0f6386fb62ec3a09e34ad652cf53efb_4376	S_aureus_10_01353
WP_000831496.1		DUF2294 domain-containing protein	4	4	1	1	129				362	362	362	0c5d6aed1d23427ac77815eabcecea75_831	c4610aa9a2d5bacd833356b3605d9b21_825	f0f6386fb62ec3a09e34ad652cf53efb_3152	S_aureus_10_02517
WP_001549787.1		hypothetical protein	4	4	1	1	875				905	1079	1035	0c5d6aed1d23427ac77815eabcecea75_5237	c4610aa9a2d5bacd833356b3605d9b21_5234	f0f6386fb62ec3a09e34ad652cf53efb_4362	S_aureus_10_01347
rpe		ribulose-phosphate 3-epimerase	4	4	1	1	2727				644	644	644	0c5d6aed1d23427ac77815eabcecea75_2293	c4610aa9a2d5bacd833356b3605d9b21_2280	f0f6386fb62ec3a09e34ad652cf53efb_1688	S_aureus_10_00173
WP_000648118.1		YtxH domain-containing protein	4	4	1	1	1540				365	365	365	0c5d6aed1d23427ac77815eabcecea75_3732	c4610aa9a2d5bacd833356b3605d9b21_3731	f0f6386fb62ec3a09e34ad652cf53efb_375	S_aureus_10_02449
WP_000120494.1		serine hydroxymethyltransferase	4	4	1	1	1738				1238	1238	1238	0c5d6aed1d23427ac77815eabcecea75_4387	c4610aa9a2d5bacd833356b3605d9b21_4386	f0f6386fb62ec3a09e34ad652cf53efb_5214	S_aureus_10_02228
WP_000608182.1		hypothetical protein	4	4	1	1	2386				521	521	521	0c5d6aed1d23427ac77815eabcecea75_1589	c4610aa9a2d5bacd833356b3605d9b21_1575	f0f6386fb62ec3a09e34ad652cf53efb_2396	S_aureus_10_00508
topA		type I DNA topoisomerase	4	4	1	1	2124				2075	2075	2075	0c5d6aed1d23427ac77815eabcecea75_2349	c4610aa9a2d5bacd833356b3605d9b21_2336	f0f6386fb62ec3a09e34ad652cf53efb_1632	S_aureus_10_00145
WP_001165377.1		HesB/YadR/YfhF family protein	4	4	1	1	2011				296	296	296	0c5d6aed1d23427ac77815eabcecea75_2577	c4610aa9a2d5bacd833356b3605d9b21_2570	f0f6386fb62ec3a09e34ad652cf53efb_1402	S_aureus_10_00036
WP_000792417.1		septum formation initiator family protein	4	4	1	1	74				392	392	392	0c5d6aed1d23427ac77815eabcecea75_958	c4610aa9a2d5bacd833356b3605d9b21_952	f0f6386fb62ec3a09e34ad652cf53efb_3025	S_aureus_10_02552
rplT		50S ribosomal protein L20	4	4	1	1	1265				356	356	356	0c5d6aed1d23427ac77815eabcecea75_3238	c4610aa9a2d5bacd833356b3605d9b21_3232	f0f6386fb62ec3a09e34ad652cf53efb_739	S_aureus_10_01760
WP_000190140.1		2-oxoacid:ferredoxin oxidoreductase subunit beta	4	4	1	1	2082				866	866	866	0c5d6aed1d23427ac77815eabcecea75_2433	c4610aa9a2d5bacd833356b3605d9b21_2420	f0f6386fb62ec3a09e34ad652cf53efb_1548	S_aureus_10_00105
WP_001103743.1		aquaporin family protein	4	4	1	1	2074				818	818	818	0c5d6aed1d23427ac77815eabcecea75_2449	c4610aa9a2d5bacd833356b3605d9b21_2436	f0f6386fb62ec3a09e34ad652cf53efb_1532	S_aureus_10_00097
WP_000353634.1		PTS fructose transporter subunit IIC	4	4	1	1	859				995	1043	1031	0c5d6aed1d23427ac77815eabcecea75_5271	c4610aa9a2d5bacd833356b3605d9b21_5268	f0f6386fb62ec3a09e34ad652cf53efb_4328	S_aureus_10_01331
dprA		DNA-processing protein DprA	4	4	1	1	2125				872	872	872	0c5d6aed1d23427ac77815eabcecea75_2347	c4610aa9a2d5bacd833356b3605d9b21_2334	f0f6386fb62ec3a09e34ad652cf53efb_1634	S_aureus_10_00146
WP_000737196.1		EfeM/EfeO family lipoprotein	4	4	1	1	222				854	854	854	0c5d6aed1d23427ac77815eabcecea75_645	c4610aa9a2d5bacd833356b3605d9b21_639	f0f6386fb62ec3a09e34ad652cf53efb_3338	S_aureus_10_00844
arsC		arsenate reductase (thioredoxin)	4	4	1	1	1364				395	395	395	0c5d6aed1d23427ac77815eabcecea75_3443	c4610aa9a2d5bacd833356b3605d9b21_3436	f0f6386fb62ec3a09e34ad652cf53efb_534	S_aureus_10_02030
miaB		tRNA (N6-isopentenyl adenosine(37)-C2)-methylthiotransferase MiaB	4	4	1	1	2080				1544	1544	1544	0c5d6aed1d23427ac77815eabcecea75_2437	c4610aa9a2d5bacd833356b3605d9b21_2424	f0f6386fb62ec3a09e34ad652cf53efb_1544	S_aureus_10_00103
WP_000143503.1		FMN-binding glutamate synthase family protein	4	4	1	1	932				1577	1577	1577	0c5d6aed1d23427ac77815eabcecea75_5117	c4610aa9a2d5bacd833356b3605d9b21_5112	f0f6386fb62ec3a09e34ad652cf53efb_4480	S_aureus_10_01403
rbsU		ribose transporter RbsU	4	4	1	1	809				881	881	881	0c5d6aed1d23427ac77815eabcecea75_487	c4610aa9a2d5bacd833356b3605d9b21_483	f0f6386fb62ec3a09e34ad652cf53efb_3500	S_aureus_10_00920
WP_000934894.1		thymidylate synthase	4	4	1	1	14				956	956	956	0c5d6aed1d23427ac77815eabcecea75_2738	c4610aa9a2d5bacd833356b3605d9b21_2730	f0f6386fb62ec3a09e34ad652cf53efb_1243	S_aureus_10_01523
WP_001127960.1		class I mannose-6-phosphate isomerase	4	4	1	1	1768				938	938	938	0c5d6aed1d23427ac77815eabcecea75_4447	c4610aa9a2d5bacd833356b3605d9b21_4446	f0f6386fb62ec3a09e34ad652cf53efb_5154	S_aureus_10_02198
secA2		accessory Sec system translocase SecA2	4	4	1	1	516				2390	2390	2390	0c5d6aed1d23427ac77815eabcecea75_5521	c4610aa9a2d5bacd833356b3605d9b21_5518	f0f6386fb62ec3a09e34ad652cf53efb_4078	S_aureus_10_01216
WP_000272070.1		heptaprenylglyceryl phosphate synthase	4	4	1	1	1471				692	692	692	0c5d6aed1d23427ac77815eabcecea75_3967	c4610aa9a2d5bacd833356b3605d9b21_3966	f0f6386fb62ec3a09e34ad652cf53efb_137	S_aureus_10_02108
WP_001190913.1		dihydroorotase	4	7	1.75	1	2707				1100	2375	1357	0c5d6aed1d23427ac77815eabcecea75_2253 0c5d6aed1d23427ac77815eabcecea75_2251	c4610aa9a2d5bacd833356b3605d9b21_2240	f0f6386fb62ec3a09e34ad652cf53efb_1728 f0f6386fb62ec3a09e34ad652cf53efb_1730	S_aureus_10_00193 S_aureus_10_00194
WP_045177727.1		ABC transporter ATP-binding protein	4	4	1	1	1774				782	782	782	0c5d6aed1d23427ac77815eabcecea75_4465	c4610aa9a2d5bacd833356b3605d9b21_4462	f0f6386fb62ec3a09e34ad652cf53efb_5136	S_aureus_10_02192
cysK		cysteine synthase A	4	4	1	1	68				932	932	932	0c5d6aed1d23427ac77815eabcecea75_970	c4610aa9a2d5bacd833356b3605d9b21_964	f0f6386fb62ec3a09e34ad652cf53efb_3013	S_aureus_10_02546
WP_000668995.1		superantigen-like protein SSL1	4	4	1	1	159				680	680	680	0c5d6aed1d23427ac77815eabcecea75_773	c4610aa9a2d5bacd833356b3605d9b21_767	f0f6386fb62ec3a09e34ad652cf53efb_3210	S_aureus_10_00783
WP_045176869.1		leukocidin/hemolysin toxin family protein	4	4	1	1	1419				983	983	983	0c5d6aed1d23427ac77815eabcecea75_3552	c4610aa9a2d5bacd833356b3605d9b21_3547	f0f6386fb62ec3a09e34ad652cf53efb_427	S_aureus_10_02360
group_1404	mqo	malate dehydrogenase (quinone)	4	4	1	1	1029				1478	1478	1478	0c5d6aed1d23427ac77815eabcecea75_4917	c4610aa9a2d5bacd833356b3605d9b21_4914	f0f6386fb62ec3a09e34ad652cf53efb_4680	S_aureus_10_01495
fni		type 2 isopentenyl-diphosphate Delta-isomerase	4	4	1	1	1959				1049	1049	1049	0c5d6aed1d23427ac77815eabcecea75_4873	c4610aa9a2d5bacd833356b3605d9b21_4868	f0f6386fb62ec3a09e34ad652cf53efb_4724	S_aureus_10_01935
WP_045177951.1		hypothetical protein	4	4	1	1	2293				452	452	452	0c5d6aed1d23427ac77815eabcecea75_1393	c4610aa9a2d5bacd833356b3605d9b21_1383	f0f6386fb62ec3a09e34ad652cf53efb_2590	S_aureus_10_00597
WP_001109872.1		flavin reductase family protein	4	4	1	1	523				692	692	692	0c5d6aed1d23427ac77815eabcecea75_5533	c4610aa9a2d5bacd833356b3605d9b21_5530	f0f6386fb62ec3a09e34ad652cf53efb_4066	S_aureus_10_01210
WP_000057542.1		tetratricopeptide repeat protein	4	4	1	1	2363				1439	1439	1439	0c5d6aed1d23427ac77815eabcecea75_1538	c4610aa9a2d5bacd833356b3605d9b21_1526	f0f6386fb62ec3a09e34ad652cf53efb_2445	S_aureus_10_00531
WP_000861038.1		CHAP domain-containing protein	4	4	1	1	1057				755	755	755	0c5d6aed1d23427ac77815eabcecea75_4055	c4610aa9a2d5bacd833356b3605d9b21_4054	f0f6386fb62ec3a09e34ad652cf53efb_49	S_aureus_10_02145
WP_001789900.1		TetR/AcrR family transcriptional regulator	4	4	1	1	434				569	587	573	0c5d6aed1d23427ac77815eabcecea75_5351	c4610aa9a2d5bacd833356b3605d9b21_5348	f0f6386fb62ec3a09e34ad652cf53efb_4248	S_aureus_10_01293
secY		preprotein translocase subunit SecY	4	4	1	1	1842				1292	1292	1292	0c5d6aed1d23427ac77815eabcecea75_4634	c4610aa9a2d5bacd833356b3605d9b21_4629	f0f6386fb62ec3a09e34ad652cf53efb_4963	S_aureus_10_01823
WP_000213880.1		DHA2 family efflux MFS transporter permease subunit	4	4	1	1	1965				1931	1931	1931	0c5d6aed1d23427ac77815eabcecea75_4885	c4610aa9a2d5bacd833356b3605d9b21_4880	f0f6386fb62ec3a09e34ad652cf53efb_4712	S_aureus_10_01941
WP_001245769.1		ABC transporter permease	4	4	1	1	1543				1223	1223	1223	0c5d6aed1d23427ac77815eabcecea75_3726	c4610aa9a2d5bacd833356b3605d9b21_3725	f0f6386fb62ec3a09e34ad652cf53efb_381	S_aureus_10_02452
WP_000732334.1		MetQ/NlpA family ABC transporter substrate-binding protein	4	4	1	1	2416				821	821	821	0c5d6aed1d23427ac77815eabcecea75_1648	c4610aa9a2d5bacd833356b3605d9b21_1636	f0f6386fb62ec3a09e34ad652cf53efb_2337	S_aureus_10_00478
WP_000734792.1		hypothetical protein	4	4	1	1	506				458	458	458	0c5d6aed1d23427ac77815eabcecea75_5501	c4610aa9a2d5bacd833356b3605d9b21_5498	f0f6386fb62ec3a09e34ad652cf53efb_4098	S_aureus_10_01226
WP_000757543.1		MarR family transcriptional regulator	4	4	1	1	1353				401	401	401	0c5d6aed1d23427ac77815eabcecea75_3420	c4610aa9a2d5bacd833356b3605d9b21_3413	f0f6386fb62ec3a09e34ad652cf53efb_557	S_aureus_10_02020
bshA		N-acetyl-alpha-D-glucosaminyl L-malate synthase BshA	4	4	1	1	282				1142	1142	1142	0c5d6aed1d23427ac77815eabcecea75_2801	c4610aa9a2d5bacd833356b3605d9b21_2795	f0f6386fb62ec3a09e34ad652cf53efb_1180	S_aureus_10_01554
WP_001239283.1		TDT family transporter	4	4	1	1	2678				947	947	947	0c5d6aed1d23427ac77815eabcecea75_2188	c4610aa9a2d5bacd833356b3605d9b21_2177	f0f6386fb62ec3a09e34ad652cf53efb_1797	S_aureus_10_00225
WP_001244298.1		membrane protein	4	4	1	1	1128				218	218	218	0c5d6aed1d23427ac77815eabcecea75_2952	c4610aa9a2d5bacd833356b3605d9b21_2946	f0f6386fb62ec3a09e34ad652cf53efb_1025	S_aureus_10_01626
mnhF1		Na(+)/H(+) antiporter subunit F1	4	4	1	1	2453				293	293	293	0c5d6aed1d23427ac77815eabcecea75_1724	c4610aa9a2d5bacd833356b3605d9b21_1712	f0f6386fb62ec3a09e34ad652cf53efb_2261	S_aureus_10_00442
WP_001808306.1		hypothetical protein	4	4	1	1	435				320	536	482	0c5d6aed1d23427ac77815eabcecea75_5353	c4610aa9a2d5bacd833356b3605d9b21_5350	f0f6386fb62ec3a09e34ad652cf53efb_4246	S_aureus_10_01292
WP_000491755.1		DUF47 domain-containing protein	4	4	1	1	2260				617	617	617	0c5d6aed1d23427ac77815eabcecea75_1325	c4610aa9a2d5bacd833356b3605d9b21_1315	f0f6386fb62ec3a09e34ad652cf53efb_2658	S_aureus_10_00630
tadA		tRNA adenosine(34) deaminase TadA	4	4	1	1	2158				470	470	470	0c5d6aed1d23427ac77815eabcecea75_1113	c4610aa9a2d5bacd833356b3605d9b21_1107	f0f6386fb62ec3a09e34ad652cf53efb_2870	S_aureus_10_00732
WP_000477989.1		MurR/RpiR family transcriptional regulator	4	4	1	1	1938				764	764	764	0c5d6aed1d23427ac77815eabcecea75_4828	c4610aa9a2d5bacd833356b3605d9b21_4823	f0f6386fb62ec3a09e34ad652cf53efb_4769	S_aureus_10_01915
WP_001033867.1		CPBP family glutamic-type intramembrane protease	4	4	1	1	2536				602	602	602	0c5d6aed1d23427ac77815eabcecea75_1891	c4610aa9a2d5bacd833356b3605d9b21_1878	f0f6386fb62ec3a09e34ad652cf53efb_2094	S_aureus_10_00360
WP_000660709.1		MFS transporter	4	4	1	1	880				1277	1277	1277	0c5d6aed1d23427ac77815eabcecea75_5225	c4610aa9a2d5bacd833356b3605d9b21_5222	f0f6386fb62ec3a09e34ad652cf53efb_4374	S_aureus_10_01352
gcvPA		aminomethyl-transferring glycine dehydrogenase subunit GcvPA	4	4	1	1	1132				1346	1346	1346	0c5d6aed1d23427ac77815eabcecea75_2960	c4610aa9a2d5bacd833356b3605d9b21_2954	f0f6386fb62ec3a09e34ad652cf53efb_1017	S_aureus_10_01630
WP_001033971.1		DUF1700 domain-containing protein	4	4	1	1	1448				557	557	557	0c5d6aed1d23427ac77815eabcecea75_4015	c4610aa9a2d5bacd833356b3605d9b21_4016	f0f6386fb62ec3a09e34ad652cf53efb_89	S_aureus_10_02129
fakB2		fatty acid kinase binding subunit FakB2	4	4	1	1	812				839	839	839	0c5d6aed1d23427ac77815eabcecea75_2734	c4610aa9a2d5bacd833356b3605d9b21_2726	f0f6386fb62ec3a09e34ad652cf53efb_1247	S_aureus_10_01521
WP_000849950.1		phage major capsid protein	4	4	1	1	1076				1247	1247	1247	0c5d6aed1d23427ac77815eabcecea75_4093	c4610aa9a2d5bacd833356b3605d9b21_4092	f0f6386fb62ec3a09e34ad652cf53efb_11	S_aureus_10_02161
srtA		class A sortase SrtA	4	4	1	1	864				620	620	620	0c5d6aed1d23427ac77815eabcecea75_5259	c4610aa9a2d5bacd833356b3605d9b21_5256	f0f6386fb62ec3a09e34ad652cf53efb_4340	S_aureus_10_01336
group_143		CocE/NonD family hydrolase	4	4	1	1	455				1043	1142	1067	0c5d6aed1d23427ac77815eabcecea75_5393	c4610aa9a2d5bacd833356b3605d9b21_5390	f0f6386fb62ec3a09e34ad652cf53efb_4206	S_aureus_10_01272
group_1430	brnQ	branched-chain amino acid transport system II carrier protein	4	4	1	1	343				1307	1307	1307	0c5d6aed1d23427ac77815eabcecea75_567	c4610aa9a2d5bacd833356b3605d9b21_561	f0f6386fb62ec3a09e34ad652cf53efb_3416	S_aureus_10_00881
emp		extracellular matrix protein-binding adhesin Emp	4	4	1	1	2390				1022	1022	1022	0c5d6aed1d23427ac77815eabcecea75_1597	c4610aa9a2d5bacd833356b3605d9b21_1583	f0f6386fb62ec3a09e34ad652cf53efb_2388	S_aureus_10_00504
ruvA		Holliday junction branch migration protein RuvA	4	4	1	1	1235				602	602	602	0c5d6aed1d23427ac77815eabcecea75_3174	c4610aa9a2d5bacd833356b3605d9b21_3168	f0f6386fb62ec3a09e34ad652cf53efb_803	S_aureus_10_01733
tenA		thiaminase II	4	4	1	1	1720				689	689	689	0c5d6aed1d23427ac77815eabcecea75_4348	c4610aa9a2d5bacd833356b3605d9b21_4347	f0f6386fb62ec3a09e34ad652cf53efb_5253	S_aureus_10_02246
rplD		50S ribosomal protein L4	4	4	1	1	1861				623	623	623	0c5d6aed1d23427ac77815eabcecea75_4672	c4610aa9a2d5bacd833356b3605d9b21_4667	f0f6386fb62ec3a09e34ad652cf53efb_4925	S_aureus_10_01842
WP_000697134.1		DUF896 domain-containing protein	4	4	1	1	436				230	230	230	0c5d6aed1d23427ac77815eabcecea75_5355	c4610aa9a2d5bacd833356b3605d9b21_5352	f0f6386fb62ec3a09e34ad652cf53efb_4244	S_aureus_10_01291
nrdE		class 1b ribonucleoside-diphosphate reductase subunit alpha	4	4	1	1	2328				2105	2105	2105	0c5d6aed1d23427ac77815eabcecea75_1467	c4610aa9a2d5bacd833356b3605d9b21_1455	f0f6386fb62ec3a09e34ad652cf53efb_2516	S_aureus_10_00563
WP_000590517.1		ABC transporter ATP-binding protein	4	4	1	1	929				749	749	749	0c5d6aed1d23427ac77815eabcecea75_5123	c4610aa9a2d5bacd833356b3605d9b21_5118	f0f6386fb62ec3a09e34ad652cf53efb_4474	S_aureus_10_01400
WP_000231631.1		hypothetical protein	4	4	1	1	2668				233	233	233	0c5d6aed1d23427ac77815eabcecea75_2166	c4610aa9a2d5bacd833356b3605d9b21_2155	f0f6386fb62ec3a09e34ad652cf53efb_1819	S_aureus_10_00235
WP_000725225.1		CHAP domain-containing protein	4	4	1	1	429				767	767	767	0c5d6aed1d23427ac77815eabcecea75_5341	c4610aa9a2d5bacd833356b3605d9b21_5338	f0f6386fb62ec3a09e34ad652cf53efb_4258	S_aureus_10_01297
WP_000621533.1		aspartate 1-decarboxylase	4	4	1	1	457				371	383	380	0c5d6aed1d23427ac77815eabcecea75_5397	c4610aa9a2d5bacd833356b3605d9b21_5394	f0f6386fb62ec3a09e34ad652cf53efb_4202	S_aureus_10_01270
WP_000404422.1		L-threonylcarbamoyladenylate synthase	4	4	1	1	2483				641	641	641	0c5d6aed1d23427ac77815eabcecea75_1784	c4610aa9a2d5bacd833356b3605d9b21_1772	f0f6386fb62ec3a09e34ad652cf53efb_2201	S_aureus_10_00412
WP_000773985.1		hypothetical protein	4	4	1	1	777				173	173	173	0c5d6aed1d23427ac77815eabcecea75_419	c4610aa9a2d5bacd833356b3605d9b21_415	f0f6386fb62ec3a09e34ad652cf53efb_3568	S_aureus_10_00951
nrdR		transcriptional regulator NrdR	4	4	1	1	1273				470	470	470	0c5d6aed1d23427ac77815eabcecea75_3256	c4610aa9a2d5bacd833356b3605d9b21_3249	f0f6386fb62ec3a09e34ad652cf53efb_721	S_aureus_10_01767
WP_000348303.1		DNA-3-methyladenine glycosylase	4	4	1	1	1957				608	608	608	0c5d6aed1d23427ac77815eabcecea75_4869	c4610aa9a2d5bacd833356b3605d9b21_4864	f0f6386fb62ec3a09e34ad652cf53efb_4728	S_aureus_10_01933
WP_000548775.1		DUF3267 domain-containing protein	4	4	1	1	1481				530	530	530	0c5d6aed1d23427ac77815eabcecea75_3945	c4610aa9a2d5bacd833356b3605d9b21_3944	f0f6386fb62ec3a09e34ad652cf53efb_159	S_aureus_10_02098
raiA		ribosome-associated translation inhibitor RaiA	4	4	1	1	2349				572	572	572	0c5d6aed1d23427ac77815eabcecea75_1511	c4610aa9a2d5bacd833356b3605d9b21_1499	f0f6386fb62ec3a09e34ad652cf53efb_2472	S_aureus_10_00542
gatA		Asp-tRNA(Asn)/Glu-tRNA(Gln) amidotransferase subunit GatA	4	4	1	1	1477				1457	1457	1457	0c5d6aed1d23427ac77815eabcecea75_3955	c4610aa9a2d5bacd833356b3605d9b21_3954	f0f6386fb62ec3a09e34ad652cf53efb_149	S_aureus_10_02102
aur		zinc metalloproteinase aureolysin	4	4	1	1	504				1529	1529	1529	0c5d6aed1d23427ac77815eabcecea75_5497	c4610aa9a2d5bacd833356b3605d9b21_5494	f0f6386fb62ec3a09e34ad652cf53efb_4102	S_aureus_10_01228
WP_045177517.1		VOC family protein	4	4	1	1	311				926	926	926	0c5d6aed1d23427ac77815eabcecea75_633	c4610aa9a2d5bacd833356b3605d9b21_627	f0f6386fb62ec3a09e34ad652cf53efb_3350	S_aureus_10_00850
WP_000913019.1		ATP-binding cassette domain-containing protein	4	4	1	1	1890				605	605	605	0c5d6aed1d23427ac77815eabcecea75_4732	c4610aa9a2d5bacd833356b3605d9b21_4727	f0f6386fb62ec3a09e34ad652cf53efb_4865	S_aureus_10_01869
WP_001791974.1		hypothetical protein	4	4	1	1	486				251	260	257	0c5d6aed1d23427ac77815eabcecea75_5459	c4610aa9a2d5bacd833356b3605d9b21_5456	f0f6386fb62ec3a09e34ad652cf53efb_4140	S_aureus_10_01245
WP_000479279.1		nucleoside permease	4	4	1	1	2241				1229	1229	1229	0c5d6aed1d23427ac77815eabcecea75_1287	c4610aa9a2d5bacd833356b3605d9b21_1277	f0f6386fb62ec3a09e34ad652cf53efb_2696	S_aureus_10_00648
WP_001016166.1		aspartate carbamoyltransferase catalytic subunit	4	4	1	1	2706				881	881	881	0c5d6aed1d23427ac77815eabcecea75_2249	c4610aa9a2d5bacd833356b3605d9b21_2238	f0f6386fb62ec3a09e34ad652cf53efb_1732	S_aureus_10_00195
WP_000887920.1		M20 family metallopeptidase	4	4	1	1	30				1175	1175	1175	0c5d6aed1d23427ac77815eabcecea75_1095	c4610aa9a2d5bacd833356b3605d9b21_1089	f0f6386fb62ec3a09e34ad652cf53efb_2888	S_aureus_10_00742
mnhB2		Na+/H+ antiporter Mnh2 subunit B	4	4	1	1	2223				425	425	425	0c5d6aed1d23427ac77815eabcecea75_1247	c4610aa9a2d5bacd833356b3605d9b21_1241	f0f6386fb62ec3a09e34ad652cf53efb_2736	S_aureus_10_00668
WP_045176736.1		RNA polymerase sigma factor	4	4	1	1	46				569	569	569	0c5d6aed1d23427ac77815eabcecea75_1062	c4610aa9a2d5bacd833356b3605d9b21_1056	f0f6386fb62ec3a09e34ad652cf53efb_2921	S_aureus_10_00757
WP_001108539.1		M50 family metallopeptidase	4	4	1	1	2232				752	752	752	0c5d6aed1d23427ac77815eabcecea75_1269	c4610aa9a2d5bacd833356b3605d9b21_1259	f0f6386fb62ec3a09e34ad652cf53efb_2714	S_aureus_10_00657
isdG		staphylobilin-forming heme oxygenase IsdG	4	4	1	1	2644				323	323	323	0c5d6aed1d23427ac77815eabcecea75_2112	c4610aa9a2d5bacd833356b3605d9b21_2101	f0f6386fb62ec3a09e34ad652cf53efb_1873	S_aureus_10_00258
WP_000224622.1		CYTH domain-containing protein	4	4	1	1	2508				593	593	593	0c5d6aed1d23427ac77815eabcecea75_1834	c4610aa9a2d5bacd833356b3605d9b21_1822	f0f6386fb62ec3a09e34ad652cf53efb_2151	S_aureus_10_00387
WP_000932694.1		single-stranded DNA-binding protein	4	4	1	1	1722				395	395	395	0c5d6aed1d23427ac77815eabcecea75_4353	c4610aa9a2d5bacd833356b3605d9b21_4352	f0f6386fb62ec3a09e34ad652cf53efb_5248	S_aureus_10_02244
esaB		type VII secretion protein EsaB	4	4	1	1	365				242	242	242	0c5d6aed1d23427ac77815eabcecea75_525	c4610aa9a2d5bacd833356b3605d9b21_521	f0f6386fb62ec3a09e34ad652cf53efb_3462	S_aureus_10_00902
clfB		MSCRAMM family adhesin clumping factor ClfB	4	4	1	1	496				2561	2807	2745	0c5d6aed1d23427ac77815eabcecea75_5481	c4610aa9a2d5bacd833356b3605d9b21_5478	f0f6386fb62ec3a09e34ad652cf53efb_4118	S_aureus_10_01235
WP_000036088.1		hypothetical protein	4	4	1	1	2220				203	203	203	0c5d6aed1d23427ac77815eabcecea75_1241	c4610aa9a2d5bacd833356b3605d9b21_1235	f0f6386fb62ec3a09e34ad652cf53efb_2742	S_aureus_10_00671
tuf		elongation factor Tu	4	4	1	1	31				1184	1184	1184	0c5d6aed1d23427ac77815eabcecea75_1093	c4610aa9a2d5bacd833356b3605d9b21_1087	f0f6386fb62ec3a09e34ad652cf53efb_2890	S_aureus_10_00743
treC		alpha,alpha-phosphotrehalase	4	4	1	1	109				1640	1640	1640	0c5d6aed1d23427ac77815eabcecea75_876	c4610aa9a2d5bacd833356b3605d9b21_870	f0f6386fb62ec3a09e34ad652cf53efb_3107	S_aureus_10_02497
WP_045178186.1		PTS transporter subunit IIC	4	4	1	1	433				1055	1055	1055	0c5d6aed1d23427ac77815eabcecea75_5347	c4610aa9a2d5bacd833356b3605d9b21_5344	f0f6386fb62ec3a09e34ad652cf53efb_4252	S_aureus_10_01294
nsaS		nisin susceptibility-associated two-component system sensor histidine kinase NsaS	4	4	1	1	489				887	887	887	0c5d6aed1d23427ac77815eabcecea75_5467	c4610aa9a2d5bacd833356b3605d9b21_5464	f0f6386fb62ec3a09e34ad652cf53efb_4132	S_aureus_10_01242
vraD		peptide resistance ABC transporter ATP-binding subunit VraD	4	4	1	1	566				758	758	758	0c5d6aed1d23427ac77815eabcecea75_5619	c4610aa9a2d5bacd833356b3605d9b21_5618	f0f6386fb62ec3a09e34ad652cf53efb_3980	S_aureus_10_01166
WP_000884746.1		UDPGP type 1 family protein	4	4	1	1	1790				1187	1187	1187	0c5d6aed1d23427ac77815eabcecea75_4526	c4610aa9a2d5bacd833356b3605d9b21_4523	f0f6386fb62ec3a09e34ad652cf53efb_5075	S_aureus_10_01774
pflB		formate C-acetyltransferase	4	4	1	1	764				2249	2249	2249	0c5d6aed1d23427ac77815eabcecea75_391	c4610aa9a2d5bacd833356b3605d9b21_387	f0f6386fb62ec3a09e34ad652cf53efb_3602	S_aureus_10_00964
WP_000841351.1		thermonuclease family protein	4	4	1	1	2039				533	533	533	0c5d6aed1d23427ac77815eabcecea75_2517	c4610aa9a2d5bacd833356b3605d9b21_2510	f0f6386fb62ec3a09e34ad652cf53efb_1462	S_aureus_10_00063
rlmB		23S rRNA (guanosine(2251)-2'-O)-methyltransferase RlmB	4	4	1	1	48				746	746	746	0c5d6aed1d23427ac77815eabcecea75_1058	c4610aa9a2d5bacd833356b3605d9b21_1052	f0f6386fb62ec3a09e34ad652cf53efb_2925	S_aureus_10_00759
sasA		serine-rich repeat glycoprotein adhesin SasA	4	4	1	1	521				6599	6815	6761	0c5d6aed1d23427ac77815eabcecea75_5531	c4610aa9a2d5bacd833356b3605d9b21_5528	f0f6386fb62ec3a09e34ad652cf53efb_4068	S_aureus_10_01211
WP_000995800.1		hypothetical protein	4	4	1	1	235				248	248	248	0c5d6aed1d23427ac77815eabcecea75_2890	c4610aa9a2d5bacd833356b3605d9b21_2884	f0f6386fb62ec3a09e34ad652cf53efb_1087	S_aureus_10_01596
WP_001124167.1		PTS-dependent dihydroxyacetone kinase phosphotransferase subunit DhaM	4	4	1	1	2249				362	362	362	0c5d6aed1d23427ac77815eabcecea75_1303	c4610aa9a2d5bacd833356b3605d9b21_1293	f0f6386fb62ec3a09e34ad652cf53efb_2680	S_aureus_10_00641
WP_000456489.1		GyrI-like domain-containing protein	4	4	1	1	958				473	473	473	0c5d6aed1d23427ac77815eabcecea75_5065	c4610aa9a2d5bacd833356b3605d9b21_5060	f0f6386fb62ec3a09e34ad652cf53efb_4532	S_aureus_10_01427
WP_001096630.1		alpha-ketoacid dehydrogenase subunit beta	4	4	1	1	1113				983	983	983	0c5d6aed1d23427ac77815eabcecea75_2922	c4610aa9a2d5bacd833356b3605d9b21_2916	f0f6386fb62ec3a09e34ad652cf53efb_1055	S_aureus_10_01611
ileS		isoleucine--tRNA ligase	4	4	1	1	2700				2753	2753	2753	0c5d6aed1d23427ac77815eabcecea75_2235	c4610aa9a2d5bacd833356b3605d9b21_2224	f0f6386fb62ec3a09e34ad652cf53efb_1746	S_aureus_10_00202
WP_045176566.1		alpha/beta hydrolase	4	4	1	1	874				593	593	593	0c5d6aed1d23427ac77815eabcecea75_5239	c4610aa9a2d5bacd833356b3605d9b21_5236	f0f6386fb62ec3a09e34ad652cf53efb_4360	S_aureus_10_01346
rlmH		23S rRNA (pseudouridine(1915)-N(3))-methyltransferase RlmH	4	4	1	1	602				479	479	479	0c5d6aed1d23427ac77815eabcecea75_57	c4610aa9a2d5bacd833356b3605d9b21_57	f0f6386fb62ec3a09e34ad652cf53efb_3900	S_aureus_10_01128
WP_000534428.1		amino acid permease	4	4	1	1	463				1448	1448	1448	0c5d6aed1d23427ac77815eabcecea75_5409	c4610aa9a2d5bacd833356b3605d9b21_5406	f0f6386fb62ec3a09e34ad652cf53efb_4190	S_aureus_10_01264
WP_000183771.1		(S)-acetoin forming diacetyl reductase	4	4	1	1	671				776	776	776	0c5d6aed1d23427ac77815eabcecea75_203	c4610aa9a2d5bacd833356b3605d9b21_201	f0f6386fb62ec3a09e34ad652cf53efb_3790	S_aureus_10_01056
trpA		tryptophan synthase subunit alpha	4	4	1	1	1990				728	728	728	0c5d6aed1d23427ac77815eabcecea75_2619	c4610aa9a2d5bacd833356b3605d9b21_2612	f0f6386fb62ec3a09e34ad652cf53efb_1360	S_aureus_10_00016
WP_045176540.1		pyridoxamine 5'-phosphate oxidase family protein	4	4	1	1	1013				422	422	422	0c5d6aed1d23427ac77815eabcecea75_4949	c4610aa9a2d5bacd833356b3605d9b21_4946	f0f6386fb62ec3a09e34ad652cf53efb_4648	S_aureus_10_01480
WP_000291445.1		ROK family protein	4	4	1	1	332				860	860	860	0c5d6aed1d23427ac77815eabcecea75_589	c4610aa9a2d5bacd833356b3605d9b21_583	f0f6386fb62ec3a09e34ad652cf53efb_3394	S_aureus_10_00871
fnbB		fibronectin-binding protein FnbB	4	4	1	1	891				2789	2789	2789	0c5d6aed1d23427ac77815eabcecea75_5203	c4610aa9a2d5bacd833356b3605d9b21_5198	f0f6386fb62ec3a09e34ad652cf53efb_4396	S_aureus_10_01362
folK		2-amino-4-hydroxy-6-hydroxymethyldihydropteridine diphosphokinase	4	4	1	1	65				476	476	476	0c5d6aed1d23427ac77815eabcecea75_976	c4610aa9a2d5bacd833356b3605d9b21_970	f0f6386fb62ec3a09e34ad652cf53efb_3007	S_aureus_10_02543
WP_000287200.1		GrpB family protein	4	4	1	1	2336				518	518	518	0c5d6aed1d23427ac77815eabcecea75_1485	c4610aa9a2d5bacd833356b3605d9b21_1473	f0f6386fb62ec3a09e34ad652cf53efb_2498	S_aureus_10_00555
WP_000634684.1		galactose mutarotase	4	4	1	1	1951				1019	1019	1019	0c5d6aed1d23427ac77815eabcecea75_4857	c4610aa9a2d5bacd833356b3605d9b21_4852	f0f6386fb62ec3a09e34ad652cf53efb_4740	S_aureus_10_01928
WP_000076037.1		branched-chain amino acid aminotransferase	4	4	1	1	25				1085	1085	1085	0c5d6aed1d23427ac77815eabcecea75_1105	c4610aa9a2d5bacd833356b3605d9b21_1099	f0f6386fb62ec3a09e34ad652cf53efb_2878	S_aureus_10_00737
phnE		phosphonate ABC transporter, permease protein PhnE	4	4	1	1	686				800	800	800	0c5d6aed1d23427ac77815eabcecea75_235	c4610aa9a2d5bacd833356b3605d9b21_231	f0f6386fb62ec3a09e34ad652cf53efb_3758	S_aureus_10_01041
rpmG		50S ribosomal protein L33	4	4	1	1	1148				149	149	149	0c5d6aed1d23427ac77815eabcecea75_2993	c4610aa9a2d5bacd833356b3605d9b21_2987	f0f6386fb62ec3a09e34ad652cf53efb_984	S_aureus_10_01644
WP_000746687.1		NDxxF motif lipoprotein	4	4	1	1	186				626	626	626	0c5d6aed1d23427ac77815eabcecea75_716	c4610aa9a2d5bacd833356b3605d9b21_712	f0f6386fb62ec3a09e34ad652cf53efb_3267	S_aureus_10_00810
WP_000779136.1		DUF3147 family protein	4	4	1	1	571				374	395	389	0c5d6aed1d23427ac77815eabcecea75_5629	c4610aa9a2d5bacd833356b3605d9b21_5628	f0f6386fb62ec3a09e34ad652cf53efb_3970	S_aureus_10_01161
WP_049296478.1		SMC family ATPase	4	4	1	1	2016				3029	3029	3029	0c5d6aed1d23427ac77815eabcecea75_2567	c4610aa9a2d5bacd833356b3605d9b21_2560	f0f6386fb62ec3a09e34ad652cf53efb_1412	S_aureus_10_00041
rpsH		30S ribosomal protein S8	4	4	1	1	1848				398	398	398	0c5d6aed1d23427ac77815eabcecea75_4646	c4610aa9a2d5bacd833356b3605d9b21_4641	f0f6386fb62ec3a09e34ad652cf53efb_4951	S_aureus_10_01829
WP_000775141.1		assimilatory sulfite reductase (NADPH) flavoprotein subunit	4	4	1	1	483				1877	1877	1877	0c5d6aed1d23427ac77815eabcecea75_5453	c4610aa9a2d5bacd833356b3605d9b21_5450	f0f6386fb62ec3a09e34ad652cf53efb_4146	S_aureus_10_01247
WP_000031267.1		class I SAM-dependent methyltransferase	4	4	1	1	806				761	761	761	0c5d6aed1d23427ac77815eabcecea75_479	c4610aa9a2d5bacd833356b3605d9b21_475	f0f6386fb62ec3a09e34ad652cf53efb_3508	S_aureus_10_00923
WP_001045133.1		response regulator transcription factor	4	4	1	1	1530				623	623	623	0c5d6aed1d23427ac77815eabcecea75_3752	c4610aa9a2d5bacd833356b3605d9b21_3751	f0f6386fb62ec3a09e34ad652cf53efb_355	S_aureus_10_02440
cap8H		type 8 capsular polysaccharide synthesis protein Cap8H	4	4	1	1	701				1079	1079	1079	0c5d6aed1d23427ac77815eabcecea75_265	c4610aa9a2d5bacd833356b3605d9b21_261	f0f6386fb62ec3a09e34ad652cf53efb_3728	S_aureus_10_01026
WP_001060842.1		Nramp family divalent metal transporter	4	4	1	1	2613				1352	1352	1352	0c5d6aed1d23427ac77815eabcecea75_2052	c4610aa9a2d5bacd833356b3605d9b21_2041	f0f6386fb62ec3a09e34ad652cf53efb_1933	S_aureus_10_00287
WP_000153346.1		SRPBCC domain-containing protein	4	4	1	1	990				467	467	467	0c5d6aed1d23427ac77815eabcecea75_4995	c4610aa9a2d5bacd833356b3605d9b21_4992	f0f6386fb62ec3a09e34ad652cf53efb_4602	S_aureus_10_01457
WP_000351243.1		hypothetical protein	4	4	1	1	1636				539	539	539	0c5d6aed1d23427ac77815eabcecea75_4165	c4610aa9a2d5bacd833356b3605d9b21_4164	f0f6386fb62ec3a09e34ad652cf53efb_5436	S_aureus_10_02295
hisA		1-(5-phosphoribosyl)-5-((5-phosphoribosylamino)methylideneamino)imidazole-4-carboxamide isomerase	4	4	1	1	540				704	704	704	0c5d6aed1d23427ac77815eabcecea75_5569	c4610aa9a2d5bacd833356b3605d9b21_5568	f0f6386fb62ec3a09e34ad652cf53efb_4030	S_aureus_10_01192
ebh		hyperosmolarity resistance protein Ebh	4	5	1.25	1	305				11903	31874	25457	0c5d6aed1d23427ac77815eabcecea75_2752	c4610aa9a2d5bacd833356b3605d9b21_2746	f0f6386fb62ec3a09e34ad652cf53efb_1229	S_aureus_10_01530 S_aureus_10_01531
WP_000164001.1		6-phospho-beta-glucosidase	4	4	1	1	804				1436	1436	1436	0c5d6aed1d23427ac77815eabcecea75_477	c4610aa9a2d5bacd833356b3605d9b21_473	f0f6386fb62ec3a09e34ad652cf53efb_3510	S_aureus_10_00924
pyrF		orotidine-5'-phosphate decarboxylase	4	4	1	1	2709				692	692	692	0c5d6aed1d23427ac77815eabcecea75_2257	c4610aa9a2d5bacd833356b3605d9b21_2244	f0f6386fb62ec3a09e34ad652cf53efb_1724	S_aureus_10_00191
WP_000142122.1		TIGR01741 family protein	4	4	1	1	357				494	494	494	0c5d6aed1d23427ac77815eabcecea75_541	c4610aa9a2d5bacd833356b3605d9b21_537	f0f6386fb62ec3a09e34ad652cf53efb_3446	S_aureus_10_00894
aaa		autolysin/adhesin Aaa	4	4	1	1	119				1004	1004	1004	0c5d6aed1d23427ac77815eabcecea75_853	c4610aa9a2d5bacd833356b3605d9b21_847	f0f6386fb62ec3a09e34ad652cf53efb_3130	S_aureus_10_02508
WP_001280018.1		hypothetical protein	4	4	1	1	1263				929	929	929	0c5d6aed1d23427ac77815eabcecea75_3234	c4610aa9a2d5bacd833356b3605d9b21_3228	f0f6386fb62ec3a09e34ad652cf53efb_743	S_aureus_10_01758
lspA		signal peptidase II	4	4	1	1	2702				491	491	491	0c5d6aed1d23427ac77815eabcecea75_2241	c4610aa9a2d5bacd833356b3605d9b21_2230	f0f6386fb62ec3a09e34ad652cf53efb_1740	S_aureus_10_00199
WP_000735864.1		homoserine dehydrogenase	4	4	1	1	2035				1280	1280	1280	0c5d6aed1d23427ac77815eabcecea75_2525	c4610aa9a2d5bacd833356b3605d9b21_2518	f0f6386fb62ec3a09e34ad652cf53efb_1454	S_aureus_10_00059
WP_001027139.1		hypothetical protein	4	4	1	1	2040				188	188	188	0c5d6aed1d23427ac77815eabcecea75_2515	c4610aa9a2d5bacd833356b3605d9b21_2508	f0f6386fb62ec3a09e34ad652cf53efb_1464	S_aureus_10_00064
hxlB		6-phospho-3-hexuloisomerase	4	4	1	1	2171				548	548	548	0c5d6aed1d23427ac77815eabcecea75_1139	c4610aa9a2d5bacd833356b3605d9b21_1133	f0f6386fb62ec3a09e34ad652cf53efb_2844	S_aureus_10_00719
WP_045177904.1		AAA family ATPase	4	4	1	1	628				1700	1700	1700	0c5d6aed1d23427ac77815eabcecea75_115	c4610aa9a2d5bacd833356b3605d9b21_113	f0f6386fb62ec3a09e34ad652cf53efb_3878	S_aureus_10_01099
walK		cell wall metabolism sensor histidine kinase WalK	4	4	1	1	597				1826	1826	1826	0c5d6aed1d23427ac77815eabcecea75_47	c4610aa9a2d5bacd833356b3605d9b21_47	f0f6386fb62ec3a09e34ad652cf53efb_3910	S_aureus_10_01133
fmt		methionyl-tRNA formyltransferase	4	4	1	1	2721				935	935	935	0c5d6aed1d23427ac77815eabcecea75_2281	c4610aa9a2d5bacd833356b3605d9b21_2268	f0f6386fb62ec3a09e34ad652cf53efb_1700	S_aureus_10_00179
qoxC		cytochrome aa3 quinol oxidase subunit III	4	4	1	1	2565				605	605	605	0c5d6aed1d23427ac77815eabcecea75_1957	c4610aa9a2d5bacd833356b3605d9b21_1944	f0f6386fb62ec3a09e34ad652cf53efb_2028	S_aureus_10_00333
WP_000859443.1		helix-turn-helix domain-containing protein	4	4	1	1	2090				392	392	392	0c5d6aed1d23427ac77815eabcecea75_2417	c4610aa9a2d5bacd833356b3605d9b21_2404	f0f6386fb62ec3a09e34ad652cf53efb_1564	S_aureus_10_00113
ltaS		polyglycerol-phosphate lipoteichoic acid synthase LtaS	4	4	1	1	2316				1940	1940	1940	0c5d6aed1d23427ac77815eabcecea75_1439	c4610aa9a2d5bacd833356b3605d9b21_1429	f0f6386fb62ec3a09e34ad652cf53efb_2544	S_aureus_10_00575
hemC		hydroxymethylbilane synthase	4	4	1	1	1256				926	926	926	0c5d6aed1d23427ac77815eabcecea75_3220	c4610aa9a2d5bacd833356b3605d9b21_3214	f0f6386fb62ec3a09e34ad652cf53efb_757	S_aureus_10_01752
WP_000731647.1		LysM peptidoglycan-binding domain-containing protein	4	4	1	1	2262				797	797	797	0c5d6aed1d23427ac77815eabcecea75_1329	c4610aa9a2d5bacd833356b3605d9b21_1319	f0f6386fb62ec3a09e34ad652cf53efb_2654	S_aureus_10_00628
WP_000491990.1		GNAT family N-acetyltransferase	4	4	1	1	2560				434	434	434	0c5d6aed1d23427ac77815eabcecea75_1947	c4610aa9a2d5bacd833356b3605d9b21_1934	f0f6386fb62ec3a09e34ad652cf53efb_2038	S_aureus_10_00338
WP_001224187.1		TetR/AcrR family transcriptional regulator	4	4	1	1	440				557	557	557	0c5d6aed1d23427ac77815eabcecea75_5363	c4610aa9a2d5bacd833356b3605d9b21_5360	f0f6386fb62ec3a09e34ad652cf53efb_4236	S_aureus_10_01287
WP_000340119.1		UDP-N-acetylmuramoyl-L-alanyl-D-glutamate--L-lysine ligase	4	4	1	1	2522				1484	1484	1484	0c5d6aed1d23427ac77815eabcecea75_1862	c4610aa9a2d5bacd833356b3605d9b21_1850	f0f6386fb62ec3a09e34ad652cf53efb_2123	S_aureus_10_00373
WP_000953569.1		oxidoreductase	4	4	1	1	460				860	860	860	0c5d6aed1d23427ac77815eabcecea75_5403	c4610aa9a2d5bacd833356b3605d9b21_5400	f0f6386fb62ec3a09e34ad652cf53efb_4196	S_aureus_10_01267
WP_045176943.1		YbhB/YbcL family Raf kinase inhibitor-like protein	4	4	1	1	2485				515	515	515	0c5d6aed1d23427ac77815eabcecea75_1788	c4610aa9a2d5bacd833356b3605d9b21_1776	f0f6386fb62ec3a09e34ad652cf53efb_2197	S_aureus_10_00410
hemE		uroporphyrinogen decarboxylase	4	4	1	1	1546				1037	1037	1037	0c5d6aed1d23427ac77815eabcecea75_3720	c4610aa9a2d5bacd833356b3605d9b21_3719	f0f6386fb62ec3a09e34ad652cf53efb_387	S_aureus_10_02454
WP_000244278.1		GNAT family N-acetyltransferase	4	4	1	1	528				500	500	500	0c5d6aed1d23427ac77815eabcecea75_5545	c4610aa9a2d5bacd833356b3605d9b21_5542	f0f6386fb62ec3a09e34ad652cf53efb_4054	S_aureus_10_01204
murQ		N-acetylmuramic acid 6-phosphate etherase	4	4	1	1	736				896	896	896	0c5d6aed1d23427ac77815eabcecea75_335	c4610aa9a2d5bacd833356b3605d9b21_331	f0f6386fb62ec3a09e34ad652cf53efb_3658	S_aureus_10_00992
liaF		cell wall-active antibiotics response protein LiaF	4	4	1	1	1493				701	701	701	0c5d6aed1d23427ac77815eabcecea75_3921	c4610aa9a2d5bacd833356b3605d9b21_3920	f0f6386fb62ec3a09e34ad652cf53efb_183	S_aureus_10_02088
WP_000240662.1		thioredoxin family protein	4	4	1	1	399				344	344	344	0c5d6aed1d23427ac77815eabcecea75_5279	c4610aa9a2d5bacd833356b3605d9b21_5276	f0f6386fb62ec3a09e34ad652cf53efb_4320	S_aureus_10_01327
graF		hypothetical protein	4	4	1	1	2586				134	134	134	0c5d6aed1d23427ac77815eabcecea75_1998	c4610aa9a2d5bacd833356b3605d9b21_1987	f0f6386fb62ec3a09e34ad652cf53efb_1987	S_aureus_10_00313
WP_001206093.1		aldehyde dehydrogenase family protein	4	4	1	1	1747				1427	1427	1427	0c5d6aed1d23427ac77815eabcecea75_4405	c4610aa9a2d5bacd833356b3605d9b21_4404	f0f6386fb62ec3a09e34ad652cf53efb_5196	S_aureus_10_02219
ggt		gamma-glutamyltransferase	4	4	1	1	748				2006	2006	2006	0c5d6aed1d23427ac77815eabcecea75_359	c4610aa9a2d5bacd833356b3605d9b21_355	f0f6386fb62ec3a09e34ad652cf53efb_3634	S_aureus_10_00980
WP_001096494.1		transaldolase	4	4	1	1	1371				713	713	713	0c5d6aed1d23427ac77815eabcecea75_3457	c4610aa9a2d5bacd833356b3605d9b21_3450	f0f6386fb62ec3a09e34ad652cf53efb_520	S_aureus_10_02037
essC		type VII secretion protein EssC	4	4	1	1	363				4439	4439	4439	0c5d6aed1d23427ac77815eabcecea75_529	c4610aa9a2d5bacd833356b3605d9b21_525	f0f6386fb62ec3a09e34ad652cf53efb_3458	S_aureus_10_00900
group_1532	msrA	peptide-methionine (S)-S-oxide reductase MsrA	4	4	1	1	813				533	533	533	0c5d6aed1d23427ac77815eabcecea75_2732	c4610aa9a2d5bacd833356b3605d9b21_2724	f0f6386fb62ec3a09e34ad652cf53efb_1249	S_aureus_10_01520
WP_001291521.1		hypothetical protein	4	4	1	1	942				599	599	599	0c5d6aed1d23427ac77815eabcecea75_5097	c4610aa9a2d5bacd833356b3605d9b21_5092	f0f6386fb62ec3a09e34ad652cf53efb_4500	S_aureus_10_01413
WP_001125208.1		2,3-diphosphoglycerate-dependent phosphoglycerate mutase	4	4	1	1	977				686	686	686	0c5d6aed1d23427ac77815eabcecea75_5023	c4610aa9a2d5bacd833356b3605d9b21_5018	f0f6386fb62ec3a09e34ad652cf53efb_4574	S_aureus_10_01445
WP_000759232.1		phosphate ABC transporter substrate-binding protein PstS	4	4	1	1	1974				983	983	983	0c5d6aed1d23427ac77815eabcecea75_2651	c4610aa9a2d5bacd833356b3605d9b21_2644	f0f6386fb62ec3a09e34ad652cf53efb_1328	S_aureus_10_00001
arlR		response regulator transcription factor ArlR	4	4	1	1	822				659	659	659	0c5d6aed1d23427ac77815eabcecea75_2710	c4610aa9a2d5bacd833356b3605d9b21_2702	f0f6386fb62ec3a09e34ad652cf53efb_1271	S_aureus_10_01511
WP_000769830.1		superantigen-like protein SSL7	4	4	1	1	153				695	695	695	0c5d6aed1d23427ac77815eabcecea75_785	c4610aa9a2d5bacd833356b3605d9b21_779	f0f6386fb62ec3a09e34ad652cf53efb_3198	S_aureus_10_00778
WP_000472235.1		ABC transporter permease	4	4	1	1	926				935	935	935	0c5d6aed1d23427ac77815eabcecea75_5129	c4610aa9a2d5bacd833356b3605d9b21_5124	f0f6386fb62ec3a09e34ad652cf53efb_4468	S_aureus_10_01397
WP_000616839.1		ABC transporter ATP-binding protein	4	4	1	1	2332				761	761	761	0c5d6aed1d23427ac77815eabcecea75_1477	c4610aa9a2d5bacd833356b3605d9b21_1465	f0f6386fb62ec3a09e34ad652cf53efb_2506	S_aureus_10_00559
WP_000670307.1		sensor histidine kinase	4	4	1	1	2042				1091	1091	1091	0c5d6aed1d23427ac77815eabcecea75_2511	c4610aa9a2d5bacd833356b3605d9b21_2504	f0f6386fb62ec3a09e34ad652cf53efb_1468	S_aureus_10_00066
WP_000809514.1		pyruvate carboxylase	4	4	1	1	2622				3452	3452	3452	0c5d6aed1d23427ac77815eabcecea75_2070	c4610aa9a2d5bacd833356b3605d9b21_2059	f0f6386fb62ec3a09e34ad652cf53efb_1915	S_aureus_10_00279
lipA		lipoyl synthase	4	4	1	1	2430				917	917	917	0c5d6aed1d23427ac77815eabcecea75_1678	c4610aa9a2d5bacd833356b3605d9b21_1666	f0f6386fb62ec3a09e34ad652cf53efb_2307	S_aureus_10_00464
WP_000157603.1		F0F1 ATP synthase subunit gamma	4	4	1	1	1729				866	866	866	0c5d6aed1d23427ac77815eabcecea75_4369	c4610aa9a2d5bacd833356b3605d9b21_4368	f0f6386fb62ec3a09e34ad652cf53efb_5232	S_aureus_10_02237
WP_000785094.1		YhgE/Pip domain-containing protein	4	4	1	1	510				2981	2981	2981	0c5d6aed1d23427ac77815eabcecea75_5509	c4610aa9a2d5bacd833356b3605d9b21_5506	f0f6386fb62ec3a09e34ad652cf53efb_4090	S_aureus_10_01222
pgsA		CDP-diacylglycerol--glycerol-3-phosphate 3-phosphatidyltransferase	4	4	1	1	2089				578	578	578	0c5d6aed1d23427ac77815eabcecea75_2419	c4610aa9a2d5bacd833356b3605d9b21_2406	f0f6386fb62ec3a09e34ad652cf53efb_1562	S_aureus_10_00112
WP_000435341.1		transcriptional regulator	4	4	1	1	1637				260	260	260	0c5d6aed1d23427ac77815eabcecea75_4167	c4610aa9a2d5bacd833356b3605d9b21_4166	f0f6386fb62ec3a09e34ad652cf53efb_5434	S_aureus_10_02296
sapep		Mn(2+)-dependent dipeptidase Sapep	4	4	1	1	1342				1409	1409	1409	0c5d6aed1d23427ac77815eabcecea75_3398	c4610aa9a2d5bacd833356b3605d9b21_3391	f0f6386fb62ec3a09e34ad652cf53efb_579	S_aureus_10_02009
WP_000737705.1		CHAP domain-containing protein	4	4	1	1	1916				500	500	500	0c5d6aed1d23427ac77815eabcecea75_4784	c4610aa9a2d5bacd833356b3605d9b21_4779	f0f6386fb62ec3a09e34ad652cf53efb_4813	S_aureus_10_01894
group_1549	budA	acetolactate decarboxylase	4	4	1	1	1826				704	704	704	0c5d6aed1d23427ac77815eabcecea75_4600	c4610aa9a2d5bacd833356b3605d9b21_4597	f0f6386fb62ec3a09e34ad652cf53efb_4997	S_aureus_10_01808
xseA		exodeoxyribonuclease VII large subunit	4	4	1	1	1120				1337	1337	1337	0c5d6aed1d23427ac77815eabcecea75_2936	c4610aa9a2d5bacd833356b3605d9b21_2930	f0f6386fb62ec3a09e34ad652cf53efb_1041	S_aureus_10_01618
WP_000504439.1		flavoprotein	4	4	1	1	1415				518	518	518	0c5d6aed1d23427ac77815eabcecea75_3544	c4610aa9a2d5bacd833356b3605d9b21_3539	f0f6386fb62ec3a09e34ad652cf53efb_435	S_aureus_10_02356
dnaJ		molecular chaperone DnaJ	4	4	1	1	1176				1139	1139	1139	0c5d6aed1d23427ac77815eabcecea75_3049	c4610aa9a2d5bacd833356b3605d9b21_3043	f0f6386fb62ec3a09e34ad652cf53efb_928	S_aureus_10_01672
rimI		ribosomal protein S18-alanine N-acetyltransferase	4	4	1	1	1674				464	464	464	0c5d6aed1d23427ac77815eabcecea75_4241	c4610aa9a2d5bacd833356b3605d9b21_4240	f0f6386fb62ec3a09e34ad652cf53efb_5360	S_aureus_10_02332
icaD		intracellular adhesion protein IcaD	4	4	1	1	534				305	305	305	0c5d6aed1d23427ac77815eabcecea75_5557	c4610aa9a2d5bacd833356b3605d9b21_5554	f0f6386fb62ec3a09e34ad652cf53efb_4042	S_aureus_10_01198
WP_000580198.1		hypothetical protein	4	4	1	1	2031				314	314	314	0c5d6aed1d23427ac77815eabcecea75_2533	c4610aa9a2d5bacd833356b3605d9b21_2526	f0f6386fb62ec3a09e34ad652cf53efb_1446	S_aureus_10_00055
WP_000088195.1		cysteine hydrolase	4	4	1	1	512				560	560	560	0c5d6aed1d23427ac77815eabcecea75_5513	c4610aa9a2d5bacd833356b3605d9b21_5510	f0f6386fb62ec3a09e34ad652cf53efb_4086	S_aureus_10_01220
WP_001022967.1		NupC/NupG family nucleoside CNT transporter	4	4	1	1	335				1220	1220	1220	0c5d6aed1d23427ac77815eabcecea75_583	c4610aa9a2d5bacd833356b3605d9b21_577	f0f6386fb62ec3a09e34ad652cf53efb_3400	S_aureus_10_00874
rpsB		30S ribosomal protein S2	4	4	1	1	2117				767	767	767	0c5d6aed1d23427ac77815eabcecea75_2363	c4610aa9a2d5bacd833356b3605d9b21_2350	f0f6386fb62ec3a09e34ad652cf53efb_1618	S_aureus_10_00139
groL		chaperonin GroEL	4	4	1	1	1652				1616	1616	1616	0c5d6aed1d23427ac77815eabcecea75_4195	c4610aa9a2d5bacd833356b3605d9b21_4194	f0f6386fb62ec3a09e34ad652cf53efb_5406	S_aureus_10_02311
lukE		bi-component leukocidin LukED subunit E	4	4	1	1	1421				935	935	935	0c5d6aed1d23427ac77815eabcecea75_3554	c4610aa9a2d5bacd833356b3605d9b21_3549	f0f6386fb62ec3a09e34ad652cf53efb_425	S_aureus_10_02361
WP_000005886.1		hypothetical protein	4	4	1	1	2394				218	218	218	0c5d6aed1d23427ac77815eabcecea75_1605	c4610aa9a2d5bacd833356b3605d9b21_1591	f0f6386fb62ec3a09e34ad652cf53efb_2380	S_aureus_10_00500
WP_001093553.1		DM13 domain-containing protein	4	4	1	1	2305				440	440	440	0c5d6aed1d23427ac77815eabcecea75_1417	c4610aa9a2d5bacd833356b3605d9b21_1407	f0f6386fb62ec3a09e34ad652cf53efb_2566	S_aureus_10_00585
WP_000215389.1		WecB/TagA/CpsF family glycosyltransferase	4	4	1	1	2233				764	764	764	0c5d6aed1d23427ac77815eabcecea75_1271	c4610aa9a2d5bacd833356b3605d9b21_1261	f0f6386fb62ec3a09e34ad652cf53efb_2712	S_aureus_10_00656
rpmB		50S ribosomal protein L28	4	4	1	1	2729				188	188	188	0c5d6aed1d23427ac77815eabcecea75_2297	c4610aa9a2d5bacd833356b3605d9b21_2284	f0f6386fb62ec3a09e34ad652cf53efb_1684	S_aureus_10_00171
sdpA		CPBP family intramembrane metalloprotease SdpA	4	4	1	1	1370				635	635	635	0c5d6aed1d23427ac77815eabcecea75_3455	c4610aa9a2d5bacd833356b3605d9b21_3448	f0f6386fb62ec3a09e34ad652cf53efb_522	S_aureus_10_02036
WP_000070831.1		DUF4887 domain-containing protein	4	4	1	1	2370				629	629	629	0c5d6aed1d23427ac77815eabcecea75_1552	c4610aa9a2d5bacd833356b3605d9b21_1540	f0f6386fb62ec3a09e34ad652cf53efb_2431	S_aureus_10_00523
sirB		staphyloferrin B ABC transporter permease subunit SirB	4	4	1	1	659				995	995	995	0c5d6aed1d23427ac77815eabcecea75_179	c4610aa9a2d5bacd833356b3605d9b21_177	f0f6386fb62ec3a09e34ad652cf53efb_3814	S_aureus_10_01068
miaA		tRNA (adenosine(37)-N6)-dimethylallyltransferase MiaA	4	4	1	1	2070				935	935	935	0c5d6aed1d23427ac77815eabcecea75_2457	c4610aa9a2d5bacd833356b3605d9b21_2444	f0f6386fb62ec3a09e34ad652cf53efb_1524	S_aureus_10_00093
WP_000211593.1		complement inhibitor SCIN family protein	4	4	1	1	767				344	344	344	0c5d6aed1d23427ac77815eabcecea75_397	c4610aa9a2d5bacd833356b3605d9b21_393	f0f6386fb62ec3a09e34ad652cf53efb_3596	S_aureus_10_00961
WP_000131844.1		AraC family transcriptional regulator	4	4	1	1	1910				1955	1955	1955	0c5d6aed1d23427ac77815eabcecea75_4772	c4610aa9a2d5bacd833356b3605d9b21_4767	f0f6386fb62ec3a09e34ad652cf53efb_4825	S_aureus_10_01889
WP_000523668.1		SWIM zinc finger domain-containing protein	4	4	1	1	1986				473	473	473	0c5d6aed1d23427ac77815eabcecea75_2627	c4610aa9a2d5bacd833356b3605d9b21_2620	f0f6386fb62ec3a09e34ad652cf53efb_1352	S_aureus_10_00012
pmtC		phenol-soluble modulin export ABC transporter ATP-binding protein PmtC	4	4	1	1	1444				872	872	872	0c5d6aed1d23427ac77815eabcecea75_4023	c4610aa9a2d5bacd833356b3605d9b21_4024	f0f6386fb62ec3a09e34ad652cf53efb_81	S_aureus_10_02133
WP_000648723.1		mannitol-1-phosphate 5-dehydrogenase	4	4	1	1	1779				1106	1106	1106	0c5d6aed1d23427ac77815eabcecea75_4475	c4610aa9a2d5bacd833356b3605d9b21_4472	f0f6386fb62ec3a09e34ad652cf53efb_5126	S_aureus_10_02187
tsf		translation elongation factor Ts	4	4	1	1	2115				881	881	881	0c5d6aed1d23427ac77815eabcecea75_2367	c4610aa9a2d5bacd833356b3605d9b21_2354	f0f6386fb62ec3a09e34ad652cf53efb_1614	S_aureus_10_00138
WP_001283315.1		ATP-dependent RecD-like DNA helicase	4	4	1	1	1213				2477	2477	2477	0c5d6aed1d23427ac77815eabcecea75_3125	c4610aa9a2d5bacd833356b3605d9b21_3119	f0f6386fb62ec3a09e34ad652cf53efb_852	S_aureus_10_01711
saeS		two-component system sensor histidine kinase SaeS	4	4	1	1	2302				1055	1055	1055	0c5d6aed1d23427ac77815eabcecea75_1411	c4610aa9a2d5bacd833356b3605d9b21_1401	f0f6386fb62ec3a09e34ad652cf53efb_2572	S_aureus_10_00588
WP_001091387.1		DUF1444 domain-containing protein	4	4	1	1	1334				857	857	857	0c5d6aed1d23427ac77815eabcecea75_3382	c4610aa9a2d5bacd833356b3605d9b21_3375	f0f6386fb62ec3a09e34ad652cf53efb_595	S_aureus_10_02001
WP_045178056.1		glycerophosphodiester phosphodiesterase	4	4	1	1	2628				926	926	926	0c5d6aed1d23427ac77815eabcecea75_2082	c4610aa9a2d5bacd833356b3605d9b21_2071	f0f6386fb62ec3a09e34ad652cf53efb_1903	S_aureus_10_00273
WP_031590257.1		PTS transporter subunit EIIC	4	4	1	1	737				1454	1454	1454	0c5d6aed1d23427ac77815eabcecea75_337	c4610aa9a2d5bacd833356b3605d9b21_333	f0f6386fb62ec3a09e34ad652cf53efb_3656	S_aureus_10_00991
WP_000157629.1		YeiH family protein	4	4	1	1	308				995	995	995	0c5d6aed1d23427ac77815eabcecea75_639	c4610aa9a2d5bacd833356b3605d9b21_633	f0f6386fb62ec3a09e34ad652cf53efb_3344	S_aureus_10_00847
leuC		3-isopropylmalate dehydratase large subunit	4	4	1	1	1684				1370	1370	1370	0c5d6aed1d23427ac77815eabcecea75_4261	c4610aa9a2d5bacd833356b3605d9b21_4260	f0f6386fb62ec3a09e34ad652cf53efb_5340	S_aureus_10_02341
yycF		response regulator YycF	4	4	1	1	596				701	701	701	0c5d6aed1d23427ac77815eabcecea75_45	c4610aa9a2d5bacd833356b3605d9b21_45	f0f6386fb62ec3a09e34ad652cf53efb_3912	S_aureus_10_01134
fabF		beta-ketoacyl-ACP synthase II	4	4	1	1	2489				1244	1244	1244	0c5d6aed1d23427ac77815eabcecea75_1796	c4610aa9a2d5bacd833356b3605d9b21_1784	f0f6386fb62ec3a09e34ad652cf53efb_2189	S_aureus_10_00406
WP_001253464.1		DUF2871 domain-containing protein	4	4	1	1	1020				431	431	431	0c5d6aed1d23427ac77815eabcecea75_4935	c4610aa9a2d5bacd833356b3605d9b21_4932	f0f6386fb62ec3a09e34ad652cf53efb_4662	S_aureus_10_01487
modA		molybdate ABC transporter substrate-binding protein	4	4	1	1	1892				782	782	782	0c5d6aed1d23427ac77815eabcecea75_4736	c4610aa9a2d5bacd833356b3605d9b21_4731	f0f6386fb62ec3a09e34ad652cf53efb_4861	S_aureus_10_01871
WP_000180991.1		ABC transporter permease/substrate-binding protein	4	4	1	1	2319				1514	1514	1514	0c5d6aed1d23427ac77815eabcecea75_1447	c4610aa9a2d5bacd833356b3605d9b21_1437	f0f6386fb62ec3a09e34ad652cf53efb_2536	S_aureus_10_00571
WP_000455976.1		GNAT family N-acetyltransferase	4	4	1	1	633				473	473	473	0c5d6aed1d23427ac77815eabcecea75_123	c4610aa9a2d5bacd833356b3605d9b21_121	f0f6386fb62ec3a09e34ad652cf53efb_3870	S_aureus_10_01094
cdaA		diadenylate cyclase CdaA	4	4	1	1	1783				809	809	809	0c5d6aed1d23427ac77815eabcecea75_4483	c4610aa9a2d5bacd833356b3605d9b21_4480	f0f6386fb62ec3a09e34ad652cf53efb_5118	S_aureus_10_02183
WP_000921246.1		hypothetical protein	4	4	1	1	1920				233	233	233	0c5d6aed1d23427ac77815eabcecea75_4792	c4610aa9a2d5bacd833356b3605d9b21_4787	f0f6386fb62ec3a09e34ad652cf53efb_4805	S_aureus_10_01898
gpmI		2,3-bisphosphoglycerate-independent phosphoglycerate mutase	4	4	1	1	2375				1517	1517	1517	0c5d6aed1d23427ac77815eabcecea75_1562	c4610aa9a2d5bacd833356b3605d9b21_1550	f0f6386fb62ec3a09e34ad652cf53efb_2421	S_aureus_10_00518
WP_001146762.1		carboxymuconolactone decarboxylase family protein	4	4	1	1	918				422	422	422	0c5d6aed1d23427ac77815eabcecea75_5145	c4610aa9a2d5bacd833356b3605d9b21_5140	f0f6386fb62ec3a09e34ad652cf53efb_4452	S_aureus_10_01389
pknB		serine/threonine protein kinase Stk1	4	4	1	1	2725				1994	1994	1994	0c5d6aed1d23427ac77815eabcecea75_2289	c4610aa9a2d5bacd833356b3605d9b21_2276	f0f6386fb62ec3a09e34ad652cf53efb_1692	S_aureus_10_00175
WP_000915155.1		DUF3899 domain-containing protein	4	4	1	1	2490				371	371	371	0c5d6aed1d23427ac77815eabcecea75_1798	c4610aa9a2d5bacd833356b3605d9b21_1786	f0f6386fb62ec3a09e34ad652cf53efb_2187	S_aureus_10_00405
WP_001553862.1		DMT family transporter	4	4	1	1	2218				929	929	929	0c5d6aed1d23427ac77815eabcecea75_1237	c4610aa9a2d5bacd833356b3605d9b21_1231	f0f6386fb62ec3a09e34ad652cf53efb_2746	S_aureus_10_00673
bcp		thioredoxin-dependent thiol peroxidase	4	4	1	1	1516				455	455	455	0c5d6aed1d23427ac77815eabcecea75_3873	c4610aa9a2d5bacd833356b3605d9b21_3872	f0f6386fb62ec3a09e34ad652cf53efb_231	S_aureus_10_02065
WP_000049484.1		metallophosphoesterase	4	4	1	1	2661				503	503	503	0c5d6aed1d23427ac77815eabcecea75_2148	c4610aa9a2d5bacd833356b3605d9b21_2137	f0f6386fb62ec3a09e34ad652cf53efb_1837	S_aureus_10_00242
fdhD		formate dehydrogenase accessory sulfurtransferase FdhD	4	4	1	1	1893				797	797	797	0c5d6aed1d23427ac77815eabcecea75_4738	c4610aa9a2d5bacd833356b3605d9b21_4733	f0f6386fb62ec3a09e34ad652cf53efb_4859	S_aureus_10_01872
addB		helicase-exonuclease AddAB subunit AddB	4	4	1	1	2472				3476	3476	3476	0c5d6aed1d23427ac77815eabcecea75_1762	c4610aa9a2d5bacd833356b3605d9b21_1750	f0f6386fb62ec3a09e34ad652cf53efb_2223	S_aureus_10_00423
atpE		F0F1 ATP synthase subunit C	4	4	1	1	1733				212	212	212	0c5d6aed1d23427ac77815eabcecea75_4377	c4610aa9a2d5bacd833356b3605d9b21_4376	f0f6386fb62ec3a09e34ad652cf53efb_5224	S_aureus_10_02233
WP_240017451.1		MBL fold metallo-hydrolase	4	4	1	1	1625				485	689	602	0c5d6aed1d23427ac77815eabcecea75_4143	c4610aa9a2d5bacd833356b3605d9b21_4142	f0f6386fb62ec3a09e34ad652cf53efb_5458	S_aureus_10_02284
WP_045177081.1		superantigen-like protein SSL10	4	4	1	1	150				683	683	683	0c5d6aed1d23427ac77815eabcecea75_791	c4610aa9a2d5bacd833356b3605d9b21_785	f0f6386fb62ec3a09e34ad652cf53efb_3192	S_aureus_10_00775
WP_001019338.1		acetyl-CoA carboxylase biotin carboxyl carrier protein subunit	4	4	1	1	1201				449	449	449	0c5d6aed1d23427ac77815eabcecea75_3101	c4610aa9a2d5bacd833356b3605d9b21_3095	f0f6386fb62ec3a09e34ad652cf53efb_876	S_aureus_10_01699
WP_000091445.1		hypothetical protein	4	4	1	1	1372				302	302	302	0c5d6aed1d23427ac77815eabcecea75_3459	c4610aa9a2d5bacd833356b3605d9b21_3452	f0f6386fb62ec3a09e34ad652cf53efb_518	S_aureus_10_02038
cap8C		type 8 capsular polysaccharide synthesis protein Cap8C	4	4	1	1	696				764	764	764	0c5d6aed1d23427ac77815eabcecea75_255	c4610aa9a2d5bacd833356b3605d9b21_251	f0f6386fb62ec3a09e34ad652cf53efb_3738	S_aureus_10_01031
WP_000432350.1		anion permease	4	4	1	1	560				1418	1418	1418	0c5d6aed1d23427ac77815eabcecea75_5607	c4610aa9a2d5bacd833356b3605d9b21_5606	f0f6386fb62ec3a09e34ad652cf53efb_3992	S_aureus_10_01172
WP_000007967.1		TVP38/TMEM64 family protein	4	4	1	1	2469				575	575	575	0c5d6aed1d23427ac77815eabcecea75_1756	c4610aa9a2d5bacd833356b3605d9b21_1744	f0f6386fb62ec3a09e34ad652cf53efb_2229	S_aureus_10_00426
rimM		ribosome maturation factor RimM	4	4	1	1	2135				503	503	503	0c5d6aed1d23427ac77815eabcecea75_2327	c4610aa9a2d5bacd833356b3605d9b21_2314	f0f6386fb62ec3a09e34ad652cf53efb_1654	S_aureus_10_00156
WP_000778500.1		superantigen-like protein SSL9	4	4	1	1	151				698	698	698	0c5d6aed1d23427ac77815eabcecea75_789	c4610aa9a2d5bacd833356b3605d9b21_783	f0f6386fb62ec3a09e34ad652cf53efb_3194	S_aureus_10_00776
sspC		staphostatin B	4	4	1	1	2553				329	329	329	0c5d6aed1d23427ac77815eabcecea75_1931	c4610aa9a2d5bacd833356b3605d9b21_1918	f0f6386fb62ec3a09e34ad652cf53efb_2054	S_aureus_10_00345
ftsH		ATP-dependent zinc metalloprotease FtsH	4	4	1	1	70				2093	2093	2093	0c5d6aed1d23427ac77815eabcecea75_966	c4610aa9a2d5bacd833356b3605d9b21_960	f0f6386fb62ec3a09e34ad652cf53efb_3017	S_aureus_10_02548
sarU		HTH-type transcriptional regulator SarU	4	4	1	1	893				743	743	743	0c5d6aed1d23427ac77815eabcecea75_5199	c4610aa9a2d5bacd833356b3605d9b21_5194	f0f6386fb62ec3a09e34ad652cf53efb_4400	S_aureus_10_01364
WP_000837752.1		teichoic acid D-Ala incorporation-associated protein DltX	4	4	1	1	2437				152	152	152	0c5d6aed1d23427ac77815eabcecea75_1692	c4610aa9a2d5bacd833356b3605d9b21_1680	f0f6386fb62ec3a09e34ad652cf53efb_2293	S_aureus_10_00458
WP_000433365.1		M42 family metallopeptidase	4	4	1	1	1997				1031	1031	1031	0c5d6aed1d23427ac77815eabcecea75_2605	c4610aa9a2d5bacd833356b3605d9b21_2598	f0f6386fb62ec3a09e34ad652cf53efb_1374	S_aureus_10_00023
narI		respiratory nitrate reductase subunit gamma	4	4	1	1	1001				677	677	677	0c5d6aed1d23427ac77815eabcecea75_4973	c4610aa9a2d5bacd833356b3605d9b21_4970	f0f6386fb62ec3a09e34ad652cf53efb_4624	S_aureus_10_01468
trmFO		methylenetetrahydrofolate--tRNA-(uracil(54)-C(5))-methyltransferase (FADH(2)-oxidizing) TrmFO	4	4	1	1	2123				1307	1307	1307	0c5d6aed1d23427ac77815eabcecea75_2351	c4610aa9a2d5bacd833356b3605d9b21_2338	f0f6386fb62ec3a09e34ad652cf53efb_1630	S_aureus_10_00144
WP_000831298.1		membrane protein	4	4	1	1	960				659	659	659	0c5d6aed1d23427ac77815eabcecea75_5061	c4610aa9a2d5bacd833356b3605d9b21_5056	f0f6386fb62ec3a09e34ad652cf53efb_4536	S_aureus_10_01429
WP_000936720.1		N-acetylmannosamine-6-phosphate 2-epimerase	4	4	1	1	330				668	668	668	0c5d6aed1d23427ac77815eabcecea75_593	c4610aa9a2d5bacd833356b3605d9b21_587	f0f6386fb62ec3a09e34ad652cf53efb_3390	S_aureus_10_00869
WP_000287265.1		competence protein ComK	4	4	1	1	2529				569	569	569	0c5d6aed1d23427ac77815eabcecea75_1883	c4610aa9a2d5bacd833356b3605d9b21_1870	f0f6386fb62ec3a09e34ad652cf53efb_2102	S_aureus_10_00364
argH		argininosuccinate lyase	4	4	1	1	2466				1379	1379	1379	0c5d6aed1d23427ac77815eabcecea75_1750	c4610aa9a2d5bacd833356b3605d9b21_1738	f0f6386fb62ec3a09e34ad652cf53efb_2235	S_aureus_10_00429
parE		DNA topoisomerase IV subunit B	4	4	1	1	2009				1991	1991	1991	0c5d6aed1d23427ac77815eabcecea75_2581	c4610aa9a2d5bacd833356b3605d9b21_2574	f0f6386fb62ec3a09e34ad652cf53efb_1398	S_aureus_10_00034
lysS		lysine--tRNA ligase	4	4	1	1	63				1487	1487	1487	0c5d6aed1d23427ac77815eabcecea75_980	c4610aa9a2d5bacd833356b3605d9b21_974	f0f6386fb62ec3a09e34ad652cf53efb_3003	S_aureus_10_02542
nreA		nitrate respiration regulation accessory nitrate sensor NreA	4	4	1	1	1002				452	452	452	0c5d6aed1d23427ac77815eabcecea75_4971	c4610aa9a2d5bacd833356b3605d9b21_4968	f0f6386fb62ec3a09e34ad652cf53efb_4626	S_aureus_10_01469
WP_000362967.1		alpha/beta hydrolase	4	4	1	1	2213				800	800	800	0c5d6aed1d23427ac77815eabcecea75_1227	c4610aa9a2d5bacd833356b3605d9b21_1221	f0f6386fb62ec3a09e34ad652cf53efb_2756	S_aureus_10_00678
WP_000340977.1		hypothetical protein	4	4	1	1	1062				374	374	374	0c5d6aed1d23427ac77815eabcecea75_4065	c4610aa9a2d5bacd833356b3605d9b21_4064	f0f6386fb62ec3a09e34ad652cf53efb_39	S_aureus_10_02148
WP_000974922.1		iron ABC transporter permease	4	4	1	1	1796				1031	1031	1031	0c5d6aed1d23427ac77815eabcecea75_4536	c4610aa9a2d5bacd833356b3605d9b21_4535	f0f6386fb62ec3a09e34ad652cf53efb_5061	S_aureus_10_01780
scdA		iron-sulfur cluster repair di-iron protein ScdA	4	4	1	1	797				674	674	674	0c5d6aed1d23427ac77815eabcecea75_463	c4610aa9a2d5bacd833356b3605d9b21_459	f0f6386fb62ec3a09e34ad652cf53efb_3524	S_aureus_10_00931
tsaB		tRNA (adenosine(37)-N6)-threonylcarbamoyltransferase complex dimerization subunit type 1 TsaB	4	4	1	1	1675				662	662	662	0c5d6aed1d23427ac77815eabcecea75_4243	c4610aa9a2d5bacd833356b3605d9b21_4242	f0f6386fb62ec3a09e34ad652cf53efb_5358	S_aureus_10_02333
rsmB		16S rRNA (cytosine(967)-C(5))-methyltransferase RsmB	4	4	1	1	2722				1307	1307	1307	0c5d6aed1d23427ac77815eabcecea75_2283	c4610aa9a2d5bacd833356b3605d9b21_2270	f0f6386fb62ec3a09e34ad652cf53efb_1698	S_aureus_10_00178
cap8D		type 8 capsular polysaccharide synthesis protein Cap8D	4	4	1	1	697				1823	1823	1823	0c5d6aed1d23427ac77815eabcecea75_257	c4610aa9a2d5bacd833356b3605d9b21_253	f0f6386fb62ec3a09e34ad652cf53efb_3736	S_aureus_10_01030
WP_000377738.1		LysR family transcriptional regulator	4	4	1	2	12				821	821	821	0c5d6aed1d23427ac77815eabcecea75_5658	c4610aa9a2d5bacd833356b3605d9b21_5647	f0f6386fb62ec3a09e34ad652cf53efb_5511	S_aureus_10_02594
WP_000206635.1		ArgE/DapE family deacylase	4	4	1	1	1648				1223	1223	1223	0c5d6aed1d23427ac77815eabcecea75_4187	c4610aa9a2d5bacd833356b3605d9b21_4186	f0f6386fb62ec3a09e34ad652cf53efb_5414	S_aureus_10_02307
rpmJ		50S ribosomal protein L36	4	4	1	1	1839				113	113	113	0c5d6aed1d23427ac77815eabcecea75_4628	c4610aa9a2d5bacd833356b3605d9b21_4623	f0f6386fb62ec3a09e34ad652cf53efb_4969	S_aureus_10_01820
WP_000505966.1		hypothetical protein	4	4	1	1	2589				542	542	542	0c5d6aed1d23427ac77815eabcecea75_2004	c4610aa9a2d5bacd833356b3605d9b21_1993	f0f6386fb62ec3a09e34ad652cf53efb_1981	S_aureus_10_00310
yabA		DNA replication initiation control protein YabA	4	4	1	1	96				347	347	347	0c5d6aed1d23427ac77815eabcecea75_914	c4610aa9a2d5bacd833356b3605d9b21_908	f0f6386fb62ec3a09e34ad652cf53efb_3069	S_aureus_10_02573
WP_000389954.1		amino acid permease	4	4	1	1	2030				1454	1454	1454	0c5d6aed1d23427ac77815eabcecea75_2537	c4610aa9a2d5bacd833356b3605d9b21_2530	f0f6386fb62ec3a09e34ad652cf53efb_1442	S_aureus_10_00054
WP_000901749.1		endonuclease III domain-containing protein	4	4	1	1	2209				635	635	635	0c5d6aed1d23427ac77815eabcecea75_1219	c4610aa9a2d5bacd833356b3605d9b21_1213	f0f6386fb62ec3a09e34ad652cf53efb_2764	S_aureus_10_00682
mobA		molybdenum cofactor guanylyltransferase MobA	4	4	1	1	1882				599	599	599	0c5d6aed1d23427ac77815eabcecea75_4716	c4610aa9a2d5bacd833356b3605d9b21_4711	f0f6386fb62ec3a09e34ad652cf53efb_4881	S_aureus_10_01861
WP_000777188.1		metal-dependent hydrolase	4	4	1	1	1293				689	689	689	0c5d6aed1d23427ac77815eabcecea75_3298	c4610aa9a2d5bacd833356b3605d9b21_3291	f0f6386fb62ec3a09e34ad652cf53efb_679	S_aureus_10_01966
WP_000827001.1		hypothetical protein	4	4	1	1	1026				629	629	629	0c5d6aed1d23427ac77815eabcecea75_4923	c4610aa9a2d5bacd833356b3605d9b21_4920	f0f6386fb62ec3a09e34ad652cf53efb_4674	S_aureus_10_01492
WP_000828722.1		sodium-dependent transporter	4	4	1	1	125				1337	1337	1337	0c5d6aed1d23427ac77815eabcecea75_841	c4610aa9a2d5bacd833356b3605d9b21_835	f0f6386fb62ec3a09e34ad652cf53efb_3142	S_aureus_10_02514
WP_000301927.1		peptide-methionine (S)-S-oxide reductase	4	4	1	1	527				476	476	476	0c5d6aed1d23427ac77815eabcecea75_5543	c4610aa9a2d5bacd833356b3605d9b21_5540	f0f6386fb62ec3a09e34ad652cf53efb_4056	S_aureus_10_01205
WP_000051206.1		hypothetical protein	4	4	1	1	1871				164	164	164	0c5d6aed1d23427ac77815eabcecea75_4694	c4610aa9a2d5bacd833356b3605d9b21_4689	f0f6386fb62ec3a09e34ad652cf53efb_4903	S_aureus_10_01851
WP_045178371.1		urease accessory protein UreD	4	4	1	1	1906				836	836	836	0c5d6aed1d23427ac77815eabcecea75_4764	c4610aa9a2d5bacd833356b3605d9b21_4759	f0f6386fb62ec3a09e34ad652cf53efb_4833	S_aureus_10_01885
pdhA		pyruvate dehydrogenase (acetyl-transferring) E1 component subunit alpha	4	4	1	1	2601				1112	1112	1112	0c5d6aed1d23427ac77815eabcecea75_2028	c4610aa9a2d5bacd833356b3605d9b21_2017	f0f6386fb62ec3a09e34ad652cf53efb_1957	S_aureus_10_00299
pta		phosphate acetyltransferase	4	4	1	1	2186				986	986	986	0c5d6aed1d23427ac77815eabcecea75_1171	c4610aa9a2d5bacd833356b3605d9b21_1165	f0f6386fb62ec3a09e34ad652cf53efb_2812	S_aureus_10_00703
WP_000524902.1		YqeG family HAD IIIA-type phosphatase	4	4	1	1	1194				527	527	527	0c5d6aed1d23427ac77815eabcecea75_3085	c4610aa9a2d5bacd833356b3605d9b21_3079	f0f6386fb62ec3a09e34ad652cf53efb_892	S_aureus_10_01690
WP_000277602.1		universal stress protein	4	4	1	1	1292				413	413	413	0c5d6aed1d23427ac77815eabcecea75_3296	c4610aa9a2d5bacd833356b3605d9b21_3289	f0f6386fb62ec3a09e34ad652cf53efb_681	S_aureus_10_01965
WP_000625893.1		iron ABC transporter permease	4	4	1	1	2246				1016	1016	1016	0c5d6aed1d23427ac77815eabcecea75_1297	c4610aa9a2d5bacd833356b3605d9b21_1287	f0f6386fb62ec3a09e34ad652cf53efb_2686	S_aureus_10_00644
WP_000668627.1		YxeA family protein	4	4	1	1	2538				320	320	320	0c5d6aed1d23427ac77815eabcecea75_1901	c4610aa9a2d5bacd833356b3605d9b21_1888	f0f6386fb62ec3a09e34ad652cf53efb_2084	S_aureus_10_00358
WP_001051856.1		YtxH domain-containing protein	4	4	1	1	1343				422	422	422	0c5d6aed1d23427ac77815eabcecea75_3400	c4610aa9a2d5bacd833356b3605d9b21_3393	f0f6386fb62ec3a09e34ad652cf53efb_577	S_aureus_10_02010
WP_000721707.1		HAD family hydrolase	4	4	1	1	1312				1130	1130	1130	0c5d6aed1d23427ac77815eabcecea75_3338	c4610aa9a2d5bacd833356b3605d9b21_3331	f0f6386fb62ec3a09e34ad652cf53efb_639	S_aureus_10_01983
WP_000291765.1		sce7725 family protein	4	4	1	1	742				923	923	923	0c5d6aed1d23427ac77815eabcecea75_347	c4610aa9a2d5bacd833356b3605d9b21_343	f0f6386fb62ec3a09e34ad652cf53efb_3646	S_aureus_10_00986
WP_000908959.1		hypothetical protein	4	4	1	1	636				602	602	602	0c5d6aed1d23427ac77815eabcecea75_131	c4610aa9a2d5bacd833356b3605d9b21_129	f0f6386fb62ec3a09e34ad652cf53efb_3862	S_aureus_10_01091
WP_001095260.1		transcriptional repressor	4	4	1	1	1151				410	410	410	0c5d6aed1d23427ac77815eabcecea75_2999	c4610aa9a2d5bacd833356b3605d9b21_2993	f0f6386fb62ec3a09e34ad652cf53efb_978	S_aureus_10_01647
WP_000910696.1		tRNA1(Val) (adenine(37)-N6)-methyltransferase	4	4	1	1	95				725	725	725	0c5d6aed1d23427ac77815eabcecea75_916	c4610aa9a2d5bacd833356b3605d9b21_910	f0f6386fb62ec3a09e34ad652cf53efb_3067	S_aureus_10_02572
WP_001566849.1		hypothetical protein	4	4	1	1	631				308	308	308	0c5d6aed1d23427ac77815eabcecea75_119	c4610aa9a2d5bacd833356b3605d9b21_117	f0f6386fb62ec3a09e34ad652cf53efb_3874	S_aureus_10_01096
WP_000285019.1		NAD(P)/FAD-dependent oxidoreductase	4	4	1	1	1346				1268	1268	1268	0c5d6aed1d23427ac77815eabcecea75_3406	c4610aa9a2d5bacd833356b3605d9b21_3399	f0f6386fb62ec3a09e34ad652cf53efb_571	S_aureus_10_02013
mvaD		diphosphomevalonate decarboxylase	4	4	1	1	2189				983	983	983	0c5d6aed1d23427ac77815eabcecea75_1177	c4610aa9a2d5bacd833356b3605d9b21_1171	f0f6386fb62ec3a09e34ad652cf53efb_2806	S_aureus_10_00700
WP_001153742.1		competence protein ComK	4	4	1	1	1368				443	443	443	0c5d6aed1d23427ac77815eabcecea75_3451	c4610aa9a2d5bacd833356b3605d9b21_3444	f0f6386fb62ec3a09e34ad652cf53efb_526	S_aureus_10_02034
WP_000870801.1		bacteriocin-associated integral membrane family protein	4	4	1	1	2537				1964	1964	1964	0c5d6aed1d23427ac77815eabcecea75_1899	c4610aa9a2d5bacd833356b3605d9b21_1886	f0f6386fb62ec3a09e34ad652cf53efb_2086	S_aureus_10_00359
kdpB		potassium-transporting ATPase subunit KdpB	4	4	1	1	1702				2027	2027	2027	0c5d6aed1d23427ac77815eabcecea75_4312	c4610aa9a2d5bacd833356b3605d9b21_4311	f0f6386fb62ec3a09e34ad652cf53efb_5289	S_aureus_10_02263
WP_001077683.1		GTP pyrophosphokinase family protein	4	4	1	1	2510				635	635	635	0c5d6aed1d23427ac77815eabcecea75_1838	c4610aa9a2d5bacd833356b3605d9b21_1826	f0f6386fb62ec3a09e34ad652cf53efb_2147	S_aureus_10_00385
WP_045177076.1		superantigen-like protein SSL4	4	4	1	1	155				947	947	947	0c5d6aed1d23427ac77815eabcecea75_781	c4610aa9a2d5bacd833356b3605d9b21_775	f0f6386fb62ec3a09e34ad652cf53efb_3202	S_aureus_10_00780
ilvD		dihydroxy-acid dehydratase	4	4	1	1	1678				1688	1688	1688	0c5d6aed1d23427ac77815eabcecea75_4249	c4610aa9a2d5bacd833356b3605d9b21_4248	f0f6386fb62ec3a09e34ad652cf53efb_5352	S_aureus_10_02335
nth		endonuclease III	4	4	1	1	288				659	659	659	0c5d6aed1d23427ac77815eabcecea75_2789	c4610aa9a2d5bacd833356b3605d9b21_2783	f0f6386fb62ec3a09e34ad652cf53efb_1192	S_aureus_10_01548
WP_000748760.1		arginine repressor	4	4	1	1	503				449	449	449	0c5d6aed1d23427ac77815eabcecea75_5495	c4610aa9a2d5bacd833356b3605d9b21_5492	f0f6386fb62ec3a09e34ad652cf53efb_4104	S_aureus_10_01229
WP_000808500.1		molybdenum cofactor biosynthesis protein MoaE	4	4	1	1	1884				446	446	446	0c5d6aed1d23427ac77815eabcecea75_4720	c4610aa9a2d5bacd833356b3605d9b21_4715	f0f6386fb62ec3a09e34ad652cf53efb_4877	S_aureus_10_01863
WP_001001237.1		DNA-3-methyladenine glycosylase I	4	4	1	1	1251				560	560	560	0c5d6aed1d23427ac77815eabcecea75_3208	c4610aa9a2d5bacd833356b3605d9b21_3202	f0f6386fb62ec3a09e34ad652cf53efb_769	S_aureus_10_01747
WP_000415665.1		DUF4064 domain-containing protein	4	4	1	1	345				398	398	398	0c5d6aed1d23427ac77815eabcecea75_563	c4610aa9a2d5bacd833356b3605d9b21_557	f0f6386fb62ec3a09e34ad652cf53efb_3420	S_aureus_10_00883
WP_000185863.1		polysaccharide biosynthesis tyrosine autokinase	4	4	1	1	530				692	692	692	0c5d6aed1d23427ac77815eabcecea75_5549	c4610aa9a2d5bacd833356b3605d9b21_5546	f0f6386fb62ec3a09e34ad652cf53efb_4050	S_aureus_10_01202
WP_000828570.1		TetR/AcrR family transcriptional regulator	4	4	1	1	1968				551	551	551	0c5d6aed1d23427ac77815eabcecea75_4889	c4610aa9a2d5bacd833356b3605d9b21_4884	f0f6386fb62ec3a09e34ad652cf53efb_4708	S_aureus_10_01943
WP_045178101.1		bifunctional metallophosphatase/5'-nucleotidase	4	4	1	1	2429				1319	1319	1319	0c5d6aed1d23427ac77815eabcecea75_1676	c4610aa9a2d5bacd833356b3605d9b21_1664	f0f6386fb62ec3a09e34ad652cf53efb_2309	S_aureus_10_00465
WP_001000805.1		YppE family protein	4	4	1	1	293				350	350	350	0c5d6aed1d23427ac77815eabcecea75_2779	c4610aa9a2d5bacd833356b3605d9b21_2773	f0f6386fb62ec3a09e34ad652cf53efb_1202	S_aureus_10_01544
ribF		riboflavin biosynthesis protein RibF	4	4	1	1	2100				971	971	971	0c5d6aed1d23427ac77815eabcecea75_2397	c4610aa9a2d5bacd833356b3605d9b21_2384	f0f6386fb62ec3a09e34ad652cf53efb_1584	S_aureus_10_00123
WP_045176501.1		aldehyde dehydrogenase	4	4	1	1	1454				1379	1379	1379	0c5d6aed1d23427ac77815eabcecea75_4001	c4610aa9a2d5bacd833356b3605d9b21_4000	f0f6386fb62ec3a09e34ad652cf53efb_103	S_aureus_10_02123
trpB		tryptophan synthase subunit beta	4	4	1	1	1991				1214	1214	1214	0c5d6aed1d23427ac77815eabcecea75_2617	c4610aa9a2d5bacd833356b3605d9b21_2610	f0f6386fb62ec3a09e34ad652cf53efb_1362	S_aureus_10_00017
WP_000817956.1		ABC transporter ATP-binding protein/permease	4	4	1	1	2240				1727	1727	1727	0c5d6aed1d23427ac77815eabcecea75_1285	c4610aa9a2d5bacd833356b3605d9b21_1275	f0f6386fb62ec3a09e34ad652cf53efb_2698	S_aureus_10_00649
WP_000451834.1		Na+/H+ antiporter NhaC family protein	4	4	1	1	1940				1313	1313	1313	0c5d6aed1d23427ac77815eabcecea75_4832	c4610aa9a2d5bacd833356b3605d9b21_4827	f0f6386fb62ec3a09e34ad652cf53efb_4765	S_aureus_10_01917
WP_000217723.1		hypothetical protein	4	4	1	1	898				308	308	308	0c5d6aed1d23427ac77815eabcecea75_5189	c4610aa9a2d5bacd833356b3605d9b21_5184	f0f6386fb62ec3a09e34ad652cf53efb_4410	S_aureus_10_01369
esxB		WXG100 family type VII secretion effector EsxB	4	4	1	1	361				314	314	314	0c5d6aed1d23427ac77815eabcecea75_533	c4610aa9a2d5bacd833356b3605d9b21_529	f0f6386fb62ec3a09e34ad652cf53efb_3454	S_aureus_10_00898
isdI		staphylobilin-forming heme oxygenase IsdI	4	4	1	1	710				326	326	326	0c5d6aed1d23427ac77815eabcecea75_283	c4610aa9a2d5bacd833356b3605d9b21_279	f0f6386fb62ec3a09e34ad652cf53efb_3710	S_aureus_10_01017
coaE		dephospho-CoA kinase	4	4	1	1	1275				623	623	623	0c5d6aed1d23427ac77815eabcecea75_3262	c4610aa9a2d5bacd833356b3605d9b21_3255	f0f6386fb62ec3a09e34ad652cf53efb_715	S_aureus_10_01948
WP_000985878.1		LLM class flavin-dependent oxidoreductase	4	4	1	1	1217				1013	1013	1013	0c5d6aed1d23427ac77815eabcecea75_3133	c4610aa9a2d5bacd833356b3605d9b21_3127	f0f6386fb62ec3a09e34ad652cf53efb_844	S_aureus_10_01715
WP_000140050.1		ABC transporter ATP-binding protein	4	4	1	1	2493				1082	1082	1082	0c5d6aed1d23427ac77815eabcecea75_1804	c4610aa9a2d5bacd833356b3605d9b21_1792	f0f6386fb62ec3a09e34ad652cf53efb_2181	S_aureus_10_00402
WP_000889683.1		hypothetical protein	4	4	1	1	1091				161	161	161	0c5d6aed1d23427ac77815eabcecea75_4123	c4610aa9a2d5bacd833356b3605d9b21_4122	f0f6386fb62ec3a09e34ad652cf53efb_5478	S_aureus_10_02175
WP_045176827.1		bifunctional metallophosphatase/5'-nucleotidase	4	4	1	1	690				1535	1535	1535	0c5d6aed1d23427ac77815eabcecea75_243	c4610aa9a2d5bacd833356b3605d9b21_239	f0f6386fb62ec3a09e34ad652cf53efb_3750	S_aureus_10_01037
ureG		urease accessory protein UreG	4	4	1	1	1905				614	614	614	0c5d6aed1d23427ac77815eabcecea75_4762	c4610aa9a2d5bacd833356b3605d9b21_4757	f0f6386fb62ec3a09e34ad652cf53efb_4835	S_aureus_10_01884
rpmC		50S ribosomal protein L29	4	4	1	1	1854				209	209	209	0c5d6aed1d23427ac77815eabcecea75_4658	c4610aa9a2d5bacd833356b3605d9b21_4653	f0f6386fb62ec3a09e34ad652cf53efb_4939	S_aureus_10_01835
polA		DNA polymerase I	4	4	1	1	1277				2630	2630	2630	0c5d6aed1d23427ac77815eabcecea75_3266	c4610aa9a2d5bacd833356b3605d9b21_3259	f0f6386fb62ec3a09e34ad652cf53efb_711	S_aureus_10_01950
WP_000994681.1		YibE/F family protein	4	4	1	1	115				782	782	782	0c5d6aed1d23427ac77815eabcecea75_861	c4610aa9a2d5bacd833356b3605d9b21_855	f0f6386fb62ec3a09e34ad652cf53efb_3122	S_aureus_10_02504
WP_001174260.1		YpdA family putative bacillithiol disulfide reductase	4	4	1	1	260				986	986	986	0c5d6aed1d23427ac77815eabcecea75_2845	c4610aa9a2d5bacd833356b3605d9b21_2839	f0f6386fb62ec3a09e34ad652cf53efb_1136	S_aureus_10_01574
WP_001092763.1		DUF4888 domain-containing protein	4	4	1	1	1410				566	566	566	0c5d6aed1d23427ac77815eabcecea75_3534	c4610aa9a2d5bacd833356b3605d9b21_3529	f0f6386fb62ec3a09e34ad652cf53efb_445	S_aureus_10_02351
secDF		protein translocase subunit SecDF	4	4	1	1	1230				2279	2279	2279	0c5d6aed1d23427ac77815eabcecea75_3164	c4610aa9a2d5bacd833356b3605d9b21_3158	f0f6386fb62ec3a09e34ad652cf53efb_813	S_aureus_10_01728
cap8B		type 8 capsular polysaccharide synthesis protein Cap8B	4	4	1	1	695				686	686	686	0c5d6aed1d23427ac77815eabcecea75_253	c4610aa9a2d5bacd833356b3605d9b21_249	f0f6386fb62ec3a09e34ad652cf53efb_3740	S_aureus_10_01032
rpsP		30S ribosomal protein S16	4	4	1	1	2136				275	275	275	0c5d6aed1d23427ac77815eabcecea75_2325	c4610aa9a2d5bacd833356b3605d9b21_2312	f0f6386fb62ec3a09e34ad652cf53efb_1656	S_aureus_10_00157
WP_000198598.1		GbsR/MarR family transcriptional regulator	4	4	1	1	473				563	563	563	0c5d6aed1d23427ac77815eabcecea75_5433	c4610aa9a2d5bacd833356b3605d9b21_5430	f0f6386fb62ec3a09e34ad652cf53efb_4166	S_aureus_10_01254
WP_045177232.1		FAD/NAD(P)-binding domain-containing protein	4	4	1	1	1361				1502	1502	1502	0c5d6aed1d23427ac77815eabcecea75_3437	c4610aa9a2d5bacd833356b3605d9b21_3430	f0f6386fb62ec3a09e34ad652cf53efb_540	S_aureus_10_02027
polX		DNA polymerase/3'-5' exonuclease PolX	4	4	1	1	2651				1712	1712	1712	0c5d6aed1d23427ac77815eabcecea75_2128	c4610aa9a2d5bacd833356b3605d9b21_2117	f0f6386fb62ec3a09e34ad652cf53efb_1857	S_aureus_10_00251
WP_045176648.1		SAM-dependent methyltransferase	4	4	1	1	76				1193	1193	1193	0c5d6aed1d23427ac77815eabcecea75_954	c4610aa9a2d5bacd833356b3605d9b21_948	f0f6386fb62ec3a09e34ad652cf53efb_3029	S_aureus_10_02554
ftnA		H-type ferritin FtnA	4	4	1	1	1485				500	500	500	0c5d6aed1d23427ac77815eabcecea75_3937	c4610aa9a2d5bacd833356b3605d9b21_3936	f0f6386fb62ec3a09e34ad652cf53efb_167	S_aureus_10_02095
tsaE		tRNA (adenosine(37)-N6)-threonylcarbamoyltransferase complex ATPase subunit type 1 TsaE	4	4	1	1	1677				434	494	462	0c5d6aed1d23427ac77815eabcecea75_4245	c4610aa9a2d5bacd833356b3605d9b21_4244	f0f6386fb62ec3a09e34ad652cf53efb_5356	S_aureus_10_02334
WP_000258151.1		undecaprenyl/decaprenyl-phosphate alpha-N-acetylglucosaminyl 1-phosphate transferase	4	4	1	1	2344				1055	1055	1055	0c5d6aed1d23427ac77815eabcecea75_1501	c4610aa9a2d5bacd833356b3605d9b21_1489	f0f6386fb62ec3a09e34ad652cf53efb_2482	S_aureus_10_00547
WP_001004401.1		hypothetical protein	4	4	1	1	2395				284	284	284	0c5d6aed1d23427ac77815eabcecea75_1607	c4610aa9a2d5bacd833356b3605d9b21_1593	f0f6386fb62ec3a09e34ad652cf53efb_2378	S_aureus_10_00499
WP_045172812.1		ABC transporter substrate-binding protein	4	4	1	1	747				1775	1775	1775	0c5d6aed1d23427ac77815eabcecea75_357	c4610aa9a2d5bacd833356b3605d9b21_353	f0f6386fb62ec3a09e34ad652cf53efb_3636	S_aureus_10_00981
WP_049296554.1		amino acid ABC transporter ATP-binding/permease protein	4	4	1	1	2282				1673	1673	1673	0c5d6aed1d23427ac77815eabcecea75_1371	c4610aa9a2d5bacd833356b3605d9b21_1361	f0f6386fb62ec3a09e34ad652cf53efb_2612	S_aureus_10_00608
bshB2		bacillithiol biosynthesis deacetylase BshB2	4	4	1	1	2167				665	665	665	0c5d6aed1d23427ac77815eabcecea75_1131	c4610aa9a2d5bacd833356b3605d9b21_1125	f0f6386fb62ec3a09e34ad652cf53efb_2852	S_aureus_10_00723
WP_000190726.1		AzlC family ABC transporter permease	4	4	1	1	588				695	695	695	0c5d6aed1d23427ac77815eabcecea75_22	c4610aa9a2d5bacd833356b3605d9b21_22	f0f6386fb62ec3a09e34ad652cf53efb_3935	S_aureus_10_01144
WP_000375477.1		hypothetical protein	4	4	1	1	1392				176	176	176	0c5d6aed1d23427ac77815eabcecea75_3500	c4610aa9a2d5bacd833356b3605d9b21_3493	f0f6386fb62ec3a09e34ad652cf53efb_479	S_aureus_10_02057
WP_000987949.1		TIGR04197 family type VII secretion effector	4	4	1	1	449				278	278	278	0c5d6aed1d23427ac77815eabcecea75_5381	c4610aa9a2d5bacd833356b3605d9b21_5378	f0f6386fb62ec3a09e34ad652cf53efb_4218	S_aureus_10_01278
WP_001068337.1		YuzB family protein	4	4	1	1	2445				236	236	236	0c5d6aed1d23427ac77815eabcecea75_1708	c4610aa9a2d5bacd833356b3605d9b21_1696	f0f6386fb62ec3a09e34ad652cf53efb_2277	S_aureus_10_00450
thiI		tRNA 4-thiouridine(8) synthase ThiI	4	4	1	1	1301				1223	1223	1223	0c5d6aed1d23427ac77815eabcecea75_3316	c4610aa9a2d5bacd833356b3605d9b21_3309	f0f6386fb62ec3a09e34ad652cf53efb_661	S_aureus_10_01974
WP_000584765.1		ABC transporter permease	4	4	1	1	927				869	869	869	0c5d6aed1d23427ac77815eabcecea75_5127	c4610aa9a2d5bacd833356b3605d9b21_5122	f0f6386fb62ec3a09e34ad652cf53efb_4470	S_aureus_10_01398
WP_000850010.1		MerR family transcriptional regulator	4	4	1	1	1822				416	416	416	0c5d6aed1d23427ac77815eabcecea75_4592	c4610aa9a2d5bacd833356b3605d9b21_4589	f0f6386fb62ec3a09e34ad652cf53efb_5005	S_aureus_10_01805
group_1712	deoD	purine-nucleoside phosphorylase	4	4	1	1	681				707	707	707	0c5d6aed1d23427ac77815eabcecea75_225	c4610aa9a2d5bacd833356b3605d9b21_221	f0f6386fb62ec3a09e34ad652cf53efb_3768	S_aureus_10_01046
bioB		biotin synthase BioB	4	4	1	1	968				1007	1007	1007	0c5d6aed1d23427ac77815eabcecea75_5043	c4610aa9a2d5bacd833356b3605d9b21_5038	f0f6386fb62ec3a09e34ad652cf53efb_4554	S_aureus_10_01436
graR		response regulator transcription factor GraR/ApsR	4	4	1	1	2256				674	674	674	0c5d6aed1d23427ac77815eabcecea75_1317	c4610aa9a2d5bacd833356b3605d9b21_1307	f0f6386fb62ec3a09e34ad652cf53efb_2666	S_aureus_10_00634
WP_001117767.1		PhoH family protein	4	4	1	1	1168				947	947	947	0c5d6aed1d23427ac77815eabcecea75_3033	c4610aa9a2d5bacd833356b3605d9b21_3027	f0f6386fb62ec3a09e34ad652cf53efb_944	S_aureus_10_01664
pfkA		6-phosphofructokinase	4	4	1	1	1285				968	968	968	0c5d6aed1d23427ac77815eabcecea75_3282	c4610aa9a2d5bacd833356b3605d9b21_3275	f0f6386fb62ec3a09e34ad652cf53efb_695	S_aureus_10_01958
WP_000410764.1		HdeD family acid-resistance protein	4	4	1	1	565				512	512	512	0c5d6aed1d23427ac77815eabcecea75_5617	c4610aa9a2d5bacd833356b3605d9b21_5616	f0f6386fb62ec3a09e34ad652cf53efb_3982	S_aureus_10_01167
sdaAB		L-serine ammonia-lyase, iron-sulfur-dependent subunit beta	4	4	1	1	860				680	680	680	0c5d6aed1d23427ac77815eabcecea75_5269	c4610aa9a2d5bacd833356b3605d9b21_5266	f0f6386fb62ec3a09e34ad652cf53efb_4330	S_aureus_10_01332
WP_000171418.1		Asp23/Gls24 family envelope stress response protein	4	4	1	1	2730				374	374	374	0c5d6aed1d23427ac77815eabcecea75_2299	c4610aa9a2d5bacd833356b3605d9b21_2286	f0f6386fb62ec3a09e34ad652cf53efb_1682	S_aureus_10_00170
WP_001190118.1		16S rRNA (uracil(1498)-N(3))-methyltransferase	4	4	1	1	1174				752	752	752	0c5d6aed1d23427ac77815eabcecea75_3045	c4610aa9a2d5bacd833356b3605d9b21_3039	f0f6386fb62ec3a09e34ad652cf53efb_932	S_aureus_10_01670
folE2		GTP cyclohydrolase FolE2	4	4	1	1	2166				878	878	878	0c5d6aed1d23427ac77815eabcecea75_1129	c4610aa9a2d5bacd833356b3605d9b21_1123	f0f6386fb62ec3a09e34ad652cf53efb_2854	S_aureus_10_00724
WP_000843611.1		nucleotidyltransferase	4	4	1	1	2633				1139	1139	1139	0c5d6aed1d23427ac77815eabcecea75_2092	c4610aa9a2d5bacd833356b3605d9b21_2081	f0f6386fb62ec3a09e34ad652cf53efb_1893	S_aureus_10_00268
WP_000034507.1		NAD(P)-dependent oxidoreductase	4	4	1	1	951				851	851	851	0c5d6aed1d23427ac77815eabcecea75_5079	c4610aa9a2d5bacd833356b3605d9b21_5074	f0f6386fb62ec3a09e34ad652cf53efb_4518	S_aureus_10_01420
WP_000692509.1		glycosyltransferase family 4 protein	4	4	1	1	675				1166	1166	1166	0c5d6aed1d23427ac77815eabcecea75_211	c4610aa9a2d5bacd833356b3605d9b21_209	f0f6386fb62ec3a09e34ad652cf53efb_3782	S_aureus_10_01053
pyrH		UMP kinase	4	4	1	1	2114				722	722	722	0c5d6aed1d23427ac77815eabcecea75_2369	c4610aa9a2d5bacd833356b3605d9b21_2356	f0f6386fb62ec3a09e34ad652cf53efb_1612	S_aureus_10_00137
WP_000787672.1		phosphate/phosphite/phosphonate ABC transporter substrate-binding protein	4	4	1	1	688				956	956	956	0c5d6aed1d23427ac77815eabcecea75_239	c4610aa9a2d5bacd833356b3605d9b21_235	f0f6386fb62ec3a09e34ad652cf53efb_3754	S_aureus_10_01039
WP_000848304.1		U32 family peptidase	4	4	1	1	1206				1268	1268	1268	0c5d6aed1d23427ac77815eabcecea75_3111	c4610aa9a2d5bacd833356b3605d9b21_3105	f0f6386fb62ec3a09e34ad652cf53efb_866	S_aureus_10_01704
WP_029549944.1		hypothetical protein	4	4	1	1	452				275	275	275	0c5d6aed1d23427ac77815eabcecea75_5387	c4610aa9a2d5bacd833356b3605d9b21_5384	f0f6386fb62ec3a09e34ad652cf53efb_4212	S_aureus_10_01275
WP_045176560.1		D-lactate dehydrogenase	4	4	1	1	868				992	992	992	0c5d6aed1d23427ac77815eabcecea75_5251	c4610aa9a2d5bacd833356b3605d9b21_5248	f0f6386fb62ec3a09e34ad652cf53efb_4348	S_aureus_10_01340
WP_000460983.1		GGDEF domain-containing protein	4	4	1	1	2343				1070	1070	1070	0c5d6aed1d23427ac77815eabcecea75_1499	c4610aa9a2d5bacd833356b3605d9b21_1487	f0f6386fb62ec3a09e34ad652cf53efb_2484	S_aureus_10_00548
WP_000581552.1		lantibiotic immunity ABC transporter MutE/EpiE family permease subunit	4	4	1	1	1412				761	761	761	0c5d6aed1d23427ac77815eabcecea75_3538	c4610aa9a2d5bacd833356b3605d9b21_3533	f0f6386fb62ec3a09e34ad652cf53efb_441	S_aureus_10_02353
WP_000120368.1		inorganic phosphate transporter	4	4	1	1	2261				1007	1007	1007	0c5d6aed1d23427ac77815eabcecea75_1327	c4610aa9a2d5bacd833356b3605d9b21_1317	f0f6386fb62ec3a09e34ad652cf53efb_2656	S_aureus_10_00629
WP_001242317.1		pyrimidine-nucleoside phosphorylase	4	4	1	1	1761				1301	1301	1301	0c5d6aed1d23427ac77815eabcecea75_4433	c4610aa9a2d5bacd833356b3605d9b21_4432	f0f6386fb62ec3a09e34ad652cf53efb_5168	S_aureus_10_02205
WP_001044915.1		tyrosine-type recombinase/integrase	4	4	1	1	2221				560	560	560	0c5d6aed1d23427ac77815eabcecea75_1243	c4610aa9a2d5bacd833356b3605d9b21_1237	f0f6386fb62ec3a09e34ad652cf53efb_2740	S_aureus_10_00670
metG		methionine--tRNA ligase	4	4	1	1	92				1973	1973	1973	0c5d6aed1d23427ac77815eabcecea75_922	c4610aa9a2d5bacd833356b3605d9b21_916	f0f6386fb62ec3a09e34ad652cf53efb_3061	S_aureus_10_02569
WP_000267034.1		hypothetical protein	4	4	1	1	1451				173	173	173	0c5d6aed1d23427ac77815eabcecea75_4009	c4610aa9a2d5bacd833356b3605d9b21_4008	f0f6386fb62ec3a09e34ad652cf53efb_95	S_aureus_10_02126
secE		preprotein translocase subunit SecE	4	4	1	1	44				182	182	182	0c5d6aed1d23427ac77815eabcecea75_1066	c4610aa9a2d5bacd833356b3605d9b21_1060	f0f6386fb62ec3a09e34ad652cf53efb_2917	S_aureus_10_00756
WP_000888757.1		hypothetical protein	4	4	1	1	171				392	392	392	0c5d6aed1d23427ac77815eabcecea75_749	c4610aa9a2d5bacd833356b3605d9b21_743	f0f6386fb62ec3a09e34ad652cf53efb_3234	S_aureus_10_00796
sarT		HTH-type transcriptional regulator SarT	4	4	1	1	894				356	356	356	0c5d6aed1d23427ac77815eabcecea75_5197	c4610aa9a2d5bacd833356b3605d9b21_5192	f0f6386fb62ec3a09e34ad652cf53efb_4402	S_aureus_10_01365
crcB		fluoride efflux transporter CrcB	4	4	1	1	1373				365	365	365	0c5d6aed1d23427ac77815eabcecea75_3461	c4610aa9a2d5bacd833356b3605d9b21_3454	f0f6386fb62ec3a09e34ad652cf53efb_516	S_aureus_10_02039
sigB		RNA polymerase sigma factor SigB	4	4	1	1	1690				770	770	770	0c5d6aed1d23427ac77815eabcecea75_4288	c4610aa9a2d5bacd833356b3605d9b21_4287	f0f6386fb62ec3a09e34ad652cf53efb_5313	S_aureus_10_02275
WP_001218596.1		glycerol-3-phosphate dehydrogenase/oxidase	4	4	1	1	2072				1673	1673	1673	0c5d6aed1d23427ac77815eabcecea75_2453	c4610aa9a2d5bacd833356b3605d9b21_2440	f0f6386fb62ec3a09e34ad652cf53efb_1528	S_aureus_10_00095
nusA		transcription termination factor NusA	4	4	1	1	2106				1175	1175	1175	0c5d6aed1d23427ac77815eabcecea75_2385	c4610aa9a2d5bacd833356b3605d9b21_2372	f0f6386fb62ec3a09e34ad652cf53efb_1596	S_aureus_10_00129
WP_000379098.1		metal-dependent hydrolase	4	4	1	1	1510				977	977	977	0c5d6aed1d23427ac77815eabcecea75_3887	c4610aa9a2d5bacd833356b3605d9b21_3886	f0f6386fb62ec3a09e34ad652cf53efb_217	S_aureus_10_02071
WP_000182842.1		thioredoxin family protein	4	4	1	1	1446				563	563	563	0c5d6aed1d23427ac77815eabcecea75_4019	c4610aa9a2d5bacd833356b3605d9b21_4020	f0f6386fb62ec3a09e34ad652cf53efb_85	S_aureus_10_02131
WP_001242102.1		hypothetical protein	4	4	1	1	2509				347	347	347	0c5d6aed1d23427ac77815eabcecea75_1836	c4610aa9a2d5bacd833356b3605d9b21_1824	f0f6386fb62ec3a09e34ad652cf53efb_2149	S_aureus_10_00386
WP_000183375.1		polyprenyl synthetase family protein	4	4	1	1	1118				881	881	881	0c5d6aed1d23427ac77815eabcecea75_2932	c4610aa9a2d5bacd833356b3605d9b21_2926	f0f6386fb62ec3a09e34ad652cf53efb_1045	S_aureus_10_01616
WP_000793023.1		purine permease	4	4	1	1	175				1268	1268	1268	0c5d6aed1d23427ac77815eabcecea75_739	c4610aa9a2d5bacd833356b3605d9b21_735	f0f6386fb62ec3a09e34ad652cf53efb_3244	S_aureus_10_00800
WP_001229920.1		ABC transporter ATP-binding protein	4	4	1	1	1036				665	665	665	0c5d6aed1d23427ac77815eabcecea75_4905	c4610aa9a2d5bacd833356b3605d9b21_4902	f0f6386fb62ec3a09e34ad652cf53efb_4692	S_aureus_10_01501
WP_000675402.1		MFS transporter	4	4	1	1	930				1193	1193	1193	0c5d6aed1d23427ac77815eabcecea75_5121	c4610aa9a2d5bacd833356b3605d9b21_5116	f0f6386fb62ec3a09e34ad652cf53efb_4476	S_aureus_10_01401
WP_000273356.1		thymidine kinase	4	4	1	1	1744				599	599	599	0c5d6aed1d23427ac77815eabcecea75_4399	c4610aa9a2d5bacd833356b3605d9b21_4398	f0f6386fb62ec3a09e34ad652cf53efb_5202	S_aureus_10_02222
WP_000002683.1		DUF2273 domain-containing protein	4	4	1	1	1804				239	239	239	0c5d6aed1d23427ac77815eabcecea75_4552	c4610aa9a2d5bacd833356b3605d9b21_4551	f0f6386fb62ec3a09e34ad652cf53efb_5045	S_aureus_10_01787
WP_000365354.1		HAD family hydrolase	4	4	1	1	2212				719	719	719	0c5d6aed1d23427ac77815eabcecea75_1225	c4610aa9a2d5bacd833356b3605d9b21_1219	f0f6386fb62ec3a09e34ad652cf53efb_2758	S_aureus_10_00679
WP_045178243.1		DUF5080 family protein	4	4	1	1	355				611	611	611	0c5d6aed1d23427ac77815eabcecea75_545	c4610aa9a2d5bacd833356b3605d9b21_541	f0f6386fb62ec3a09e34ad652cf53efb_3442	S_aureus_10_00892
WP_000278015.1		MarR family transcriptional regulator	4	4	1	1	2558				419	419	419	0c5d6aed1d23427ac77815eabcecea75_1941	c4610aa9a2d5bacd833356b3605d9b21_1928	f0f6386fb62ec3a09e34ad652cf53efb_2044	S_aureus_10_00340
WP_001015492.1		aldo/keto reductase	4	4	1	1	1821				848	848	848	0c5d6aed1d23427ac77815eabcecea75_4590	c4610aa9a2d5bacd833356b3605d9b21_4587	f0f6386fb62ec3a09e34ad652cf53efb_5007	S_aureus_10_01804
WP_043044393.1		TSUP family transporter	4	4	1	1	1300				770	770	770	0c5d6aed1d23427ac77815eabcecea75_3314	c4610aa9a2d5bacd833356b3605d9b21_3307	f0f6386fb62ec3a09e34ad652cf53efb_663	S_aureus_10_01973
WP_045177741.1		hypothetical protein	4	4	1	1	1757				1193	1193	1193	0c5d6aed1d23427ac77815eabcecea75_4425	c4610aa9a2d5bacd833356b3605d9b21_4424	f0f6386fb62ec3a09e34ad652cf53efb_5176	S_aureus_10_02209
WP_000063582.1		PTS transporter subunit IIC	4	4	1	1	1519				1061	1061	1061	0c5d6aed1d23427ac77815eabcecea75_3774	c4610aa9a2d5bacd833356b3605d9b21_3773	f0f6386fb62ec3a09e34ad652cf53efb_333	S_aureus_10_02429
WP_000792342.1		BCCT family transporter	4	4	1	1	1806				1562	1562	1562	0c5d6aed1d23427ac77815eabcecea75_4556	c4610aa9a2d5bacd833356b3605d9b21_4555	f0f6386fb62ec3a09e34ad652cf53efb_5041	S_aureus_10_01789
WP_044288776.1		FAD/NAD(P)-binding protein	4	4	1	1	2451				1154	1154	1154	0c5d6aed1d23427ac77815eabcecea75_1720	c4610aa9a2d5bacd833356b3605d9b21_1708	f0f6386fb62ec3a09e34ad652cf53efb_2265	S_aureus_10_00444
WP_000402172.1		sodium:proton antiporter	4	4	1	1	2227				2042	2042	2042	0c5d6aed1d23427ac77815eabcecea75_1259	c4610aa9a2d5bacd833356b3605d9b21_1249	f0f6386fb62ec3a09e34ad652cf53efb_2724	S_aureus_10_00662
WP_000542320.1		Fic family protein	4	4	1	1	1197				1220	1220	1220	0c5d6aed1d23427ac77815eabcecea75_3093	c4610aa9a2d5bacd833356b3605d9b21_3087	f0f6386fb62ec3a09e34ad652cf53efb_884	S_aureus_10_01695
WP_000226912.1		DNA polymerase III subunit alpha	4	4	1	1	1289				3197	3197	3197	0c5d6aed1d23427ac77815eabcecea75_3290	c4610aa9a2d5bacd833356b3605d9b21_3283	f0f6386fb62ec3a09e34ad652cf53efb_687	S_aureus_10_01962
mutL		DNA mismatch repair endonuclease MutL	4	4	1	1	2076				2009	2009	2009	0c5d6aed1d23427ac77815eabcecea75_2445	c4610aa9a2d5bacd833356b3605d9b21_2432	f0f6386fb62ec3a09e34ad652cf53efb_1536	S_aureus_10_00099
WP_000838599.1		YeiH family protein	4	4	1	2	13				995	995	995	0c5d6aed1d23427ac77815eabcecea75_5660	c4610aa9a2d5bacd833356b3605d9b21_5645	f0f6386fb62ec3a09e34ad652cf53efb_5513	S_aureus_10_02593
pstA		phosphate ABC transporter permease PstA	4	4	1	1	1976				917	917	917	0c5d6aed1d23427ac77815eabcecea75_2647	c4610aa9a2d5bacd833356b3605d9b21_2640	f0f6386fb62ec3a09e34ad652cf53efb_1332	S_aureus_10_00003
purQ		phosphoribosylformylglycinamidine synthase I	4	4	1	1	2575				671	671	671	0c5d6aed1d23427ac77815eabcecea75_1977	c4610aa9a2d5bacd833356b3605d9b21_1964	f0f6386fb62ec3a09e34ad652cf53efb_2008	S_aureus_10_00324
WP_044292130.1		alpha/beta hydrolase	4	4	1	1	327				827	827	827	0c5d6aed1d23427ac77815eabcecea75_599	c4610aa9a2d5bacd833356b3605d9b21_593	f0f6386fb62ec3a09e34ad652cf53efb_3384	S_aureus_10_00866
purK		5-(carboxyamino)imidazole ribonucleotide synthase	4	4	1	1	2572				1124	1124	1124	0c5d6aed1d23427ac77815eabcecea75_1971	c4610aa9a2d5bacd833356b3605d9b21_1958	f0f6386fb62ec3a09e34ad652cf53efb_2014	S_aureus_10_00327
WP_045178097.1		TIGR01457 family HAD-type hydrolase	4	4	1	1	2434				779	779	779	0c5d6aed1d23427ac77815eabcecea75_1686	c4610aa9a2d5bacd833356b3605d9b21_1674	f0f6386fb62ec3a09e34ad652cf53efb_2299	S_aureus_10_00460
prfA		peptide chain release factor 1	4	4	1	1	1743				1076	1076	1076	0c5d6aed1d23427ac77815eabcecea75_4397	c4610aa9a2d5bacd833356b3605d9b21_4396	f0f6386fb62ec3a09e34ad652cf53efb_5204	S_aureus_10_02223
betB		betaine-aldehyde dehydrogenase	4	4	1	1	472				1490	1490	1490	0c5d6aed1d23427ac77815eabcecea75_5429	c4610aa9a2d5bacd833356b3605d9b21_5426	f0f6386fb62ec3a09e34ad652cf53efb_4170	S_aureus_10_01255
WP_000158376.1		phosphoglycerate mutase family protein	4	4	1	1	188				581	581	581	0c5d6aed1d23427ac77815eabcecea75_712	c4610aa9a2d5bacd833356b3605d9b21_708	f0f6386fb62ec3a09e34ad652cf53efb_3271	S_aureus_10_00813
WP_001283679.1		nitric oxide reductase activation protein NorD	4	4	1	1	829				1886	1886	1886	0c5d6aed1d23427ac77815eabcecea75_2696	c4610aa9a2d5bacd833356b3605d9b21_2688	f0f6386fb62ec3a09e34ad652cf53efb_1285	S_aureus_10_01504
cdd		cytidine deaminase	4	4	1	1	1165				404	404	404	0c5d6aed1d23427ac77815eabcecea75_3027	c4610aa9a2d5bacd833356b3605d9b21_3021	f0f6386fb62ec3a09e34ad652cf53efb_950	S_aureus_10_01661
mroQ		CPBP family intramembrane metalloprotease MroQ	4	4	1	1	1654				743	743	743	0c5d6aed1d23427ac77815eabcecea75_4199	c4610aa9a2d5bacd833356b3605d9b21_4198	f0f6386fb62ec3a09e34ad652cf53efb_5402	S_aureus_10_02313
vraE		peptide resistance ABC transporter permease subunit VraE	4	4	1	1	567				1880	1880	1880	0c5d6aed1d23427ac77815eabcecea75_5621	c4610aa9a2d5bacd833356b3605d9b21_5620	f0f6386fb62ec3a09e34ad652cf53efb_3978	S_aureus_10_01165
WP_000398672.1		beta-class phenol-soluble modulin	4	4	1	1	2680				134	134	134	0c5d6aed1d23427ac77815eabcecea75_2195	c4610aa9a2d5bacd833356b3605d9b21_2184	f0f6386fb62ec3a09e34ad652cf53efb_1786	S_aureus_10_00222
WP_000495498.1		hypothetical protein	4	4	1	1	908				326	326	326	0c5d6aed1d23427ac77815eabcecea75_5169	c4610aa9a2d5bacd833356b3605d9b21_5164	f0f6386fb62ec3a09e34ad652cf53efb_4428	S_aureus_10_01379
WP_000825510.1		iron-hydroxamate ABC transporter substrate-binding protein	4	4	1	1	1650				911	911	911	0c5d6aed1d23427ac77815eabcecea75_4191	c4610aa9a2d5bacd833356b3605d9b21_4190	f0f6386fb62ec3a09e34ad652cf53efb_5410	S_aureus_10_02309
WP_001180327.1		hydroxymethylglutaryl-CoA reductase, degradative	4	4	1	1	408				1277	1277	1277	0c5d6aed1d23427ac77815eabcecea75_5297	c4610aa9a2d5bacd833356b3605d9b21_5294	f0f6386fb62ec3a09e34ad652cf53efb_4302	S_aureus_10_01318
WP_000612128.1		urease subunit beta	4	4	1	1	1901				410	410	410	0c5d6aed1d23427ac77815eabcecea75_4754	c4610aa9a2d5bacd833356b3605d9b21_4749	f0f6386fb62ec3a09e34ad652cf53efb_4843	S_aureus_10_01880
WP_000491382.1		DUF3147 family protein	4	4	1	1	572				353	353	353	0c5d6aed1d23427ac77815eabcecea75_5631	c4610aa9a2d5bacd833356b3605d9b21_5630	f0f6386fb62ec3a09e34ad652cf53efb_3968	S_aureus_10_01160
WP_045178298.1		acyl--CoA ligase	4	4	1	1	772				1505	1505	1505	0c5d6aed1d23427ac77815eabcecea75_409	c4610aa9a2d5bacd833356b3605d9b21_405	f0f6386fb62ec3a09e34ad652cf53efb_3578	S_aureus_10_00956
WP_000466619.1		hypothetical protein	4	4	1	2	2				185	185	185	0c5d6aed1d23427ac77815eabcecea75_5692	c4610aa9a2d5bacd833356b3605d9b21_5661	f0f6386fb62ec3a09e34ad652cf53efb_5543	S_aureus_10_02600
WP_045178180.1		aminotransferase class I/II-fold pyridoxal phosphate-dependent enzyme	4	4	1	1	424				1154	1154	1154	0c5d6aed1d23427ac77815eabcecea75_5329	c4610aa9a2d5bacd833356b3605d9b21_5326	f0f6386fb62ec3a09e34ad652cf53efb_4270	S_aureus_10_01303
nrdH		glutaredoxin-like protein NrdH	4	4	1	1	2592				233	233	233	0c5d6aed1d23427ac77815eabcecea75_2010	c4610aa9a2d5bacd833356b3605d9b21_1999	f0f6386fb62ec3a09e34ad652cf53efb_1975	S_aureus_10_00307
WP_000897635.1		nitric oxide synthase oxygenase	4	4	1	1	1462				1076	1076	1076	0c5d6aed1d23427ac77815eabcecea75_3985	c4610aa9a2d5bacd833356b3605d9b21_3984	f0f6386fb62ec3a09e34ad652cf53efb_119	S_aureus_10_02117
WP_000006110.1		hypothetical protein	4	4	1	1	2060				185	185	185	0c5d6aed1d23427ac77815eabcecea75_2479	c4610aa9a2d5bacd833356b3605d9b21_2466	f0f6386fb62ec3a09e34ad652cf53efb_1502	S_aureus_10_00083
dnaX		DNA polymerase III subunit gamma/tau	4	4	1	1	105				1697	1697	1697	0c5d6aed1d23427ac77815eabcecea75_887	c4610aa9a2d5bacd833356b3605d9b21_881	f0f6386fb62ec3a09e34ad652cf53efb_3096	S_aureus_10_02494
WP_000735038.1		ABC transporter substrate-binding protein	4	4	1	1	1897				908	908	908	0c5d6aed1d23427ac77815eabcecea75_4746	c4610aa9a2d5bacd833356b3605d9b21_4741	f0f6386fb62ec3a09e34ad652cf53efb_4851	S_aureus_10_01876
cysS		cysteine--tRNA ligase	4	4	1	1	50				1400	1400	1400	0c5d6aed1d23427ac77815eabcecea75_1054	c4610aa9a2d5bacd833356b3605d9b21_1048	f0f6386fb62ec3a09e34ad652cf53efb_2929	S_aureus_10_00761
WP_001063552.1		superantigen-like protein SSL13	4	4	1	1	2672				725	725	725	0c5d6aed1d23427ac77815eabcecea75_2176	c4610aa9a2d5bacd833356b3605d9b21_2165	f0f6386fb62ec3a09e34ad652cf53efb_1809	S_aureus_10_00231
WP_000273256.1		energy-coupling factor transporter transmembrane protein EcfT	4	4	1	1	2582				806	806	806	0c5d6aed1d23427ac77815eabcecea75_1991	c4610aa9a2d5bacd833356b3605d9b21_1978	f0f6386fb62ec3a09e34ad652cf53efb_1994	S_aureus_10_00317
WP_000690199.1		metallophosphoesterase	4	4	1	1	956				806	806	806	0c5d6aed1d23427ac77815eabcecea75_5069	c4610aa9a2d5bacd833356b3605d9b21_5064	f0f6386fb62ec3a09e34ad652cf53efb_4528	S_aureus_10_01425
pfkB		1-phosphofructokinase	4	4	1	1	2296				920	920	920	0c5d6aed1d23427ac77815eabcecea75_1399	c4610aa9a2d5bacd833356b3605d9b21_1389	f0f6386fb62ec3a09e34ad652cf53efb_2584	S_aureus_10_00594
WP_000447709.1		DUF4176 domain-containing protein	4	4	1	1	447				296	296	296	0c5d6aed1d23427ac77815eabcecea75_5377	c4610aa9a2d5bacd833356b3605d9b21_5374	f0f6386fb62ec3a09e34ad652cf53efb_4222	S_aureus_10_01280
pth		aminoacyl-tRNA hydrolase	4	4	1	1	79				572	572	572	0c5d6aed1d23427ac77815eabcecea75_948	c4610aa9a2d5bacd833356b3605d9b21_942	f0f6386fb62ec3a09e34ad652cf53efb_3035	S_aureus_10_02557
WP_000212549.1		hypothetical protein	4	4	1	1	169				332	332	332	0c5d6aed1d23427ac77815eabcecea75_753	c4610aa9a2d5bacd833356b3605d9b21_747	f0f6386fb62ec3a09e34ad652cf53efb_3230	S_aureus_10_00794
hemB		porphobilinogen synthase	4	4	1	1	1254				974	974	974	0c5d6aed1d23427ac77815eabcecea75_3216	c4610aa9a2d5bacd833356b3605d9b21_3210	f0f6386fb62ec3a09e34ad652cf53efb_761	S_aureus_10_01750
WP_000664738.1		NYN domain-containing protein	4	4	1	1	47				524	524	524	0c5d6aed1d23427ac77815eabcecea75_1060	c4610aa9a2d5bacd833356b3605d9b21_1054	f0f6386fb62ec3a09e34ad652cf53efb_2923	S_aureus_10_00758
WP_000624570.1		tRNA (adenine(22)-N(1))-methyltransferase TrmK	4	4	1	1	1157				677	677	677	0c5d6aed1d23427ac77815eabcecea75_3011	c4610aa9a2d5bacd833356b3605d9b21_3005	f0f6386fb62ec3a09e34ad652cf53efb_966	S_aureus_10_01653
vraR		two-component system response regulator VraR	4	4	1	1	1495				629	629	629	0c5d6aed1d23427ac77815eabcecea75_3917	c4610aa9a2d5bacd833356b3605d9b21_3916	f0f6386fb62ec3a09e34ad652cf53efb_187	S_aureus_10_02086
WP_000956747.1		hypothetical protein	4	4	1	1	2058				251	251	251	0c5d6aed1d23427ac77815eabcecea75_2483	c4610aa9a2d5bacd833356b3605d9b21_2472	f0f6386fb62ec3a09e34ad652cf53efb_1498	S_aureus_10_00081
WP_000071351.1		DUF896 domain-containing protein	4	4	1	1	2022				239	239	239	0c5d6aed1d23427ac77815eabcecea75_2555	c4610aa9a2d5bacd833356b3605d9b21_2548	f0f6386fb62ec3a09e34ad652cf53efb_1424	S_aureus_10_00046
WP_001092409.1		K(+)-transporting ATPase subunit C	4	4	1	1	1701				560	560	560	0c5d6aed1d23427ac77815eabcecea75_4310	c4610aa9a2d5bacd833356b3605d9b21_4309	f0f6386fb62ec3a09e34ad652cf53efb_5291	S_aureus_10_02264
WP_045177480.1		CCA tRNA nucleotidyltransferase	4	4	1	1	283				1202	1202	1202	0c5d6aed1d23427ac77815eabcecea75_2799	c4610aa9a2d5bacd833356b3605d9b21_2793	f0f6386fb62ec3a09e34ad652cf53efb_1182	S_aureus_10_01553
WP_000811375.1		ribonuclease J	4	4	1	1	2596				1697	1697	1697	0c5d6aed1d23427ac77815eabcecea75_2018	c4610aa9a2d5bacd833356b3605d9b21_2007	f0f6386fb62ec3a09e34ad652cf53efb_1967	S_aureus_10_00303
moaA		GTP 3',8-cyclase MoaA	4	4	1	1	1881				1022	1022	1022	0c5d6aed1d23427ac77815eabcecea75_4714	c4610aa9a2d5bacd833356b3605d9b21_4709	f0f6386fb62ec3a09e34ad652cf53efb_4883	S_aureus_10_01860
gntK		gluconokinase	4	4	1	1	887				1553	1553	1553	0c5d6aed1d23427ac77815eabcecea75_5211	c4610aa9a2d5bacd833356b3605d9b21_5208	f0f6386fb62ec3a09e34ad652cf53efb_4388	S_aureus_10_01359
WP_000763767.1		general stress protein	4	4	1	1	177				407	407	407	0c5d6aed1d23427ac77815eabcecea75_734	c4610aa9a2d5bacd833356b3605d9b21_730	f0f6386fb62ec3a09e34ad652cf53efb_3249	S_aureus_10_00802
WP_000214289.1		prephenate dehydrogenase	4	4	1	1	1998				1091	1091	1091	0c5d6aed1d23427ac77815eabcecea75_2603	c4610aa9a2d5bacd833356b3605d9b21_2596	f0f6386fb62ec3a09e34ad652cf53efb_1376	S_aureus_10_00024
rpsM		30S ribosomal protein S13	4	4	1	1	1838				365	365	365	0c5d6aed1d23427ac77815eabcecea75_4626	c4610aa9a2d5bacd833356b3605d9b21_4621	f0f6386fb62ec3a09e34ad652cf53efb_4971	S_aureus_10_01819
WP_000009069.1		hypothetical protein	4	4	1	1	2587				1295	1295	1295	0c5d6aed1d23427ac77815eabcecea75_2000	c4610aa9a2d5bacd833356b3605d9b21_1989	f0f6386fb62ec3a09e34ad652cf53efb_1985	S_aureus_10_00312
WP_001017131.1		sensor histidine kinase	4	4	1	1	1494				1043	1043	1043	0c5d6aed1d23427ac77815eabcecea75_3919	c4610aa9a2d5bacd833356b3605d9b21_3918	f0f6386fb62ec3a09e34ad652cf53efb_185	S_aureus_10_02087
WP_000123402.1		EVE domain-containing protein	4	4	1	1	1766				1373	1373	1373	0c5d6aed1d23427ac77815eabcecea75_4443	c4610aa9a2d5bacd833356b3605d9b21_4442	f0f6386fb62ec3a09e34ad652cf53efb_5158	S_aureus_10_02200
gmk		guanylate kinase	4	4	1	1	2714				623	623	623	0c5d6aed1d23427ac77815eabcecea75_2267	c4610aa9a2d5bacd833356b3605d9b21_2254	f0f6386fb62ec3a09e34ad652cf53efb_1714	S_aureus_10_00186
WP_000256336.1		LacI family DNA-binding transcriptional regulator	4	4	1	1	228				1019	1019	1019	0c5d6aed1d23427ac77815eabcecea75_2904	c4610aa9a2d5bacd833356b3605d9b21_2898	f0f6386fb62ec3a09e34ad652cf53efb_1073	S_aureus_10_01603
WP_000023326.1		biotin-dependent carboxyltransferase family protein	4	4	1	1	1202				1010	1010	1010	0c5d6aed1d23427ac77815eabcecea75_3103	c4610aa9a2d5bacd833356b3605d9b21_3097	f0f6386fb62ec3a09e34ad652cf53efb_874	S_aureus_10_01700
WP_000846637.1		L-lactate dehydrogenase	4	4	1	1	462				959	959	959	0c5d6aed1d23427ac77815eabcecea75_5407	c4610aa9a2d5bacd833356b3605d9b21_5404	f0f6386fb62ec3a09e34ad652cf53efb_4192	S_aureus_10_01265
WP_000812832.1		aminotransferase class V-fold PLP-dependent enzyme	4	4	1	1	101				1337	1337	1337	0c5d6aed1d23427ac77815eabcecea75_904	c4610aa9a2d5bacd833356b3605d9b21_898	f0f6386fb62ec3a09e34ad652cf53efb_3079	S_aureus_10_02578
WP_045176453.1		LeuA family protein	4	4	1	1	2482				1145	1145	1145	0c5d6aed1d23427ac77815eabcecea75_1782	c4610aa9a2d5bacd833356b3605d9b21_1770	f0f6386fb62ec3a09e34ad652cf53efb_2203	S_aureus_10_00413
WP_001043863.1		HU family DNA-binding protein	4	4	1	1	268				272	272	272	0c5d6aed1d23427ac77815eabcecea75_2829	c4610aa9a2d5bacd833356b3605d9b21_2823	f0f6386fb62ec3a09e34ad652cf53efb_1152	S_aureus_10_01568
WP_000824472.1		hypothetical protein	4	4	1	1	2391				470	470	470	0c5d6aed1d23427ac77815eabcecea75_1599	c4610aa9a2d5bacd833356b3605d9b21_1585	f0f6386fb62ec3a09e34ad652cf53efb_2386	S_aureus_10_00503
WP_000377064.1		GIY-YIG nuclease family protein	4	4	1	1	94				248	248	248	0c5d6aed1d23427ac77815eabcecea75_918	c4610aa9a2d5bacd833356b3605d9b21_912	f0f6386fb62ec3a09e34ad652cf53efb_3065	S_aureus_10_02571
WP_000266096.1		alpha/beta hydrolase	4	4	1	1	1355				827	827	827	0c5d6aed1d23427ac77815eabcecea75_3422	c4610aa9a2d5bacd833356b3605d9b21_3415	f0f6386fb62ec3a09e34ad652cf53efb_555	S_aureus_10_02021
aspS		aspartate--tRNA ligase	4	4	1	1	1223				1766	1766	1766	0c5d6aed1d23427ac77815eabcecea75_3150	c4610aa9a2d5bacd833356b3605d9b21_3144	f0f6386fb62ec3a09e34ad652cf53efb_827	S_aureus_10_01721
ndk		nucleoside-diphosphate kinase	4	4	1	1	272				449	449	449	0c5d6aed1d23427ac77815eabcecea75_2821	c4610aa9a2d5bacd833356b3605d9b21_2815	f0f6386fb62ec3a09e34ad652cf53efb_1160	S_aureus_10_01564
WP_045177534.1		DUF3169 family protein	4	4	1	1	215				713	713	713	0c5d6aed1d23427ac77815eabcecea75_659	c4610aa9a2d5bacd833356b3605d9b21_653	f0f6386fb62ec3a09e34ad652cf53efb_3324	S_aureus_10_00837
cap8O		type 8 capsular polysaccharide synthesis protein Cap8O	4	4	1	1	708				1262	1262	1262	0c5d6aed1d23427ac77815eabcecea75_279	c4610aa9a2d5bacd833356b3605d9b21_275	f0f6386fb62ec3a09e34ad652cf53efb_3714	S_aureus_10_01019
WP_025175031.1		CDP-glycerol glycerophosphotransferase family protein	4	4	1	1	1027				1673	1673	1673	0c5d6aed1d23427ac77815eabcecea75_4921	c4610aa9a2d5bacd833356b3605d9b21_4918	f0f6386fb62ec3a09e34ad652cf53efb_4676	S_aureus_10_01493
ccpA		catabolite control protein A	4	4	1	1	1325				989	989	989	0c5d6aed1d23427ac77815eabcecea75_3364	c4610aa9a2d5bacd833356b3605d9b21_3357	f0f6386fb62ec3a09e34ad652cf53efb_613	S_aureus_10_01994
dltA		D-alanine--poly(phosphoribitol) ligase subunit DltA	4	4	1	1	2438				1457	1457	1457	0c5d6aed1d23427ac77815eabcecea75_1694	c4610aa9a2d5bacd833356b3605d9b21_1682	f0f6386fb62ec3a09e34ad652cf53efb_2291	S_aureus_10_00457
serA		phosphoglycerate dehydrogenase	4	4	1	1	1310				1604	1604	1604	0c5d6aed1d23427ac77815eabcecea75_3334	c4610aa9a2d5bacd833356b3605d9b21_3327	f0f6386fb62ec3a09e34ad652cf53efb_643	S_aureus_10_01982
WP_000933774.1		ribose-phosphate diphosphokinase	4	4	1	1	81				965	965	965	0c5d6aed1d23427ac77815eabcecea75_944	c4610aa9a2d5bacd833356b3605d9b21_938	f0f6386fb62ec3a09e34ad652cf53efb_3039	S_aureus_10_02559
WP_000416469.1		NYN domain-containing protein	4	4	1	1	162				689	689	689	0c5d6aed1d23427ac77815eabcecea75_767	c4610aa9a2d5bacd833356b3605d9b21_761	f0f6386fb62ec3a09e34ad652cf53efb_3216	S_aureus_10_00786
WP_045177954.1		DNA photolyase family protein	4	4	1	1	2288				1373	1373	1373	0c5d6aed1d23427ac77815eabcecea75_1383	c4610aa9a2d5bacd833356b3605d9b21_1373	f0f6386fb62ec3a09e34ad652cf53efb_2600	S_aureus_10_00602
lip2		YSIRK domain-containing triacylglycerol lipase Lip2/Geh	4	4	1	1	328				2075	2075	2075	0c5d6aed1d23427ac77815eabcecea75_597	c4610aa9a2d5bacd833356b3605d9b21_591	f0f6386fb62ec3a09e34ad652cf53efb_3386	S_aureus_10_00867
WP_001011599.1		glutamate-1-semialdehyde 2,1-aminomutase	4	4	1	1	1515				1289	1289	1289	0c5d6aed1d23427ac77815eabcecea75_3875	c4610aa9a2d5bacd833356b3605d9b21_3874	f0f6386fb62ec3a09e34ad652cf53efb_229	S_aureus_10_02066
WP_000138214.1		Crp/Fnr family transcriptional regulator	4	4	1	1	497				704	704	704	0c5d6aed1d23427ac77815eabcecea75_5483	c4610aa9a2d5bacd833356b3605d9b21_5480	f0f6386fb62ec3a09e34ad652cf53efb_4116	S_aureus_10_01234
serS		serine--tRNA ligase	4	4	1	1	587				1286	1286	1286	0c5d6aed1d23427ac77815eabcecea75_20	c4610aa9a2d5bacd833356b3605d9b21_20	f0f6386fb62ec3a09e34ad652cf53efb_3937	S_aureus_10_01145
WP_045178133.1		phosphoglycerate kinase	4	4	1	1	2373				1190	1190	1190	0c5d6aed1d23427ac77815eabcecea75_1558	c4610aa9a2d5bacd833356b3605d9b21_1546	f0f6386fb62ec3a09e34ad652cf53efb_2425	S_aureus_10_00520
WP_000214065.1		truncated hemoglobin YjbI	4	4	1	1	2507				365	365	365	0c5d6aed1d23427ac77815eabcecea75_1832	c4610aa9a2d5bacd833356b3605d9b21_1820	f0f6386fb62ec3a09e34ad652cf53efb_2153	S_aureus_10_00388
xpt		xanthine phosphoribosyltransferase	4	4	1	1	176				578	578	578	0c5d6aed1d23427ac77815eabcecea75_737	c4610aa9a2d5bacd833356b3605d9b21_733	f0f6386fb62ec3a09e34ad652cf53efb_3246	S_aureus_10_00801
rpsC		30S ribosomal protein S3	4	4	1	1	1856				653	653	653	0c5d6aed1d23427ac77815eabcecea75_4662	c4610aa9a2d5bacd833356b3605d9b21_4657	f0f6386fb62ec3a09e34ad652cf53efb_4935	S_aureus_10_01837
ilvC		ketol-acid reductoisomerase	4	4	1	1	1681				1004	1004	1004	0c5d6aed1d23427ac77815eabcecea75_4255	c4610aa9a2d5bacd833356b3605d9b21_4254	f0f6386fb62ec3a09e34ad652cf53efb_5346	S_aureus_10_02338
WP_000522384.1		nitroreductase family protein	4	4	1	1	1656				626	626	626	0c5d6aed1d23427ac77815eabcecea75_4203	c4610aa9a2d5bacd833356b3605d9b21_4202	f0f6386fb62ec3a09e34ad652cf53efb_5398	S_aureus_10_02315
WP_001093929.1		cyclic lactone autoinducer peptide	4	4	1	1	1660				140	140	140	0c5d6aed1d23427ac77815eabcecea75_4211	c4610aa9a2d5bacd833356b3605d9b21_4210	f0f6386fb62ec3a09e34ad652cf53efb_5390	S_aureus_10_02319
WP_001013481.1		cation diffusion facilitator family transporter	4	4	1	1	713				959	959	959	0c5d6aed1d23427ac77815eabcecea75_289	c4610aa9a2d5bacd833356b3605d9b21_285	f0f6386fb62ec3a09e34ad652cf53efb_3704	S_aureus_10_01014
WP_000283016.1		Y-family DNA polymerase	4	4	1	1	1999				1262	1262	1262	0c5d6aed1d23427ac77815eabcecea75_2601	c4610aa9a2d5bacd833356b3605d9b21_2594	f0f6386fb62ec3a09e34ad652cf53efb_1378	S_aureus_10_00025
gmpC		dipeptide ABC transporter glycylmethionine-binding lipoprotein	4	4	1	1	120				842	842	842	0c5d6aed1d23427ac77815eabcecea75_851	c4610aa9a2d5bacd833356b3605d9b21_845	f0f6386fb62ec3a09e34ad652cf53efb_3132	S_aureus_10_02509
srtB		class B sortase	4	4	1	1	2642				734	734	734	0c5d6aed1d23427ac77815eabcecea75_2110	c4610aa9a2d5bacd833356b3605d9b21_2099	f0f6386fb62ec3a09e34ad652cf53efb_1875	S_aureus_10_00259
WP_001217127.1		rRNA pseudouridine synthase	4	4	1	1	1344				695	695	695	0c5d6aed1d23427ac77815eabcecea75_3402	c4610aa9a2d5bacd833356b3605d9b21_3395	f0f6386fb62ec3a09e34ad652cf53efb_575	S_aureus_10_02011
WP_000066172.1		hypothetical protein	4	4	1	1	141				1322	1322	1322	0c5d6aed1d23427ac77815eabcecea75_809	c4610aa9a2d5bacd833356b3605d9b21_803	f0f6386fb62ec3a09e34ad652cf53efb_3174	S_aureus_10_02525
mgrA		HTH-type transcriptional regulator MgrA	4	4	1	1	2283				443	443	443	0c5d6aed1d23427ac77815eabcecea75_1373	c4610aa9a2d5bacd833356b3605d9b21_1363	f0f6386fb62ec3a09e34ad652cf53efb_2610	S_aureus_10_00607
WP_045177876.1		ABC transporter ATP-binding protein	4	4	1	1	550				1712	1712	1712	0c5d6aed1d23427ac77815eabcecea75_5589	c4610aa9a2d5bacd833356b3605d9b21_5588	f0f6386fb62ec3a09e34ad652cf53efb_4010	S_aureus_10_01182
icaB		intercellular adhesin biosynthesis polysaccharide N-deacetylase	4	4	1	1	535				872	872	872	0c5d6aed1d23427ac77815eabcecea75_5559	c4610aa9a2d5bacd833356b3605d9b21_5556	f0f6386fb62ec3a09e34ad652cf53efb_4040	S_aureus_10_01197
codY		GTP-sensing pleiotropic transcriptional regulator CodY	4	4	1	1	2119				773	773	773	0c5d6aed1d23427ac77815eabcecea75_2359	c4610aa9a2d5bacd833356b3605d9b21_2346	f0f6386fb62ec3a09e34ad652cf53efb_1622	S_aureus_10_00140
WP_000868413.1		phosphatidate cytidylyltransferase	4	4	1	1	2111				782	782	782	0c5d6aed1d23427ac77815eabcecea75_2375	c4610aa9a2d5bacd833356b3605d9b21_2362	f0f6386fb62ec3a09e34ad652cf53efb_1606	S_aureus_10_00134
WP_000004339.1		polysaccharide biosynthesis protein	4	4	1	1	1345				1661	1661	1661	0c5d6aed1d23427ac77815eabcecea75_3404	c4610aa9a2d5bacd833356b3605d9b21_3397	f0f6386fb62ec3a09e34ad652cf53efb_573	S_aureus_10_02012
WP_000147103.1		beta-class phenol-soluble modulin	4	4	1	1	2681				134	134	134	0c5d6aed1d23427ac77815eabcecea75_2197	c4610aa9a2d5bacd833356b3605d9b21_2186	f0f6386fb62ec3a09e34ad652cf53efb_1784	S_aureus_10_00221
WP_001081345.1		Fe(3+) dicitrate ABC transporter substrate-binding protein	4	4	1	1	2543				959	959	959	0c5d6aed1d23427ac77815eabcecea75_1911	c4610aa9a2d5bacd833356b3605d9b21_1898	f0f6386fb62ec3a09e34ad652cf53efb_2074	S_aureus_10_00354
rpoD		RNA polymerase sigma factor RpoD	4	4	1	1	1158				1106	1106	1106	0c5d6aed1d23427ac77815eabcecea75_3013	c4610aa9a2d5bacd833356b3605d9b21_3007	f0f6386fb62ec3a09e34ad652cf53efb_964	S_aureus_10_01654
cspA		cold shock protein CspA	4	4	1	1	843				200	200	200	0c5d6aed1d23427ac77815eabcecea75_2680	c4610aa9a2d5bacd833356b3605d9b21_2672	f0f6386fb62ec3a09e34ad652cf53efb_1301	S_aureus_10_02607
WP_000687412.1		LysR family transcriptional regulator	4	4	1	1	2269				866	866	866	0c5d6aed1d23427ac77815eabcecea75_1345	c4610aa9a2d5bacd833356b3605d9b21_1335	f0f6386fb62ec3a09e34ad652cf53efb_2638	S_aureus_10_00621
sbi		immunoglobulin-binding protein Sbi	4	4	1	1	975				1343	1343	1343	0c5d6aed1d23427ac77815eabcecea75_5029	c4610aa9a2d5bacd833356b3605d9b21_5024	f0f6386fb62ec3a09e34ad652cf53efb_4568	S_aureus_10_01443
dapD		2,3,4,5-tetrahydropyridine-2,6-dicarboxylate N-acetyltransferase	4	4	1	1	838				719	719	719	0c5d6aed1d23427ac77815eabcecea75_2670	c4610aa9a2d5bacd833356b3605d9b21_2662	f0f6386fb62ec3a09e34ad652cf53efb_1311	S_aureus_10_02612
WP_000640487.1		acyl-CoA thioesterase	4	4	1	1	2012				467	467	467	0c5d6aed1d23427ac77815eabcecea75_2575	c4610aa9a2d5bacd833356b3605d9b21_2568	f0f6386fb62ec3a09e34ad652cf53efb_1404	S_aureus_10_00037
sdpC		CPBP family intramembrane metalloprotease SdpC	4	4	1	1	1948				1256	1256	1256	0c5d6aed1d23427ac77815eabcecea75_4851	c4610aa9a2d5bacd833356b3605d9b21_4846	f0f6386fb62ec3a09e34ad652cf53efb_4746	S_aureus_10_01925
WP_043044652.1		thioredoxin family protein	4	4	1	1	2407				320	320	320	0c5d6aed1d23427ac77815eabcecea75_1631	c4610aa9a2d5bacd833356b3605d9b21_1617	f0f6386fb62ec3a09e34ad652cf53efb_2354	S_aureus_10_00487
lgt		prolipoprotein diacylglyceryl transferase	4	4	1	1	2361				839	839	839	0c5d6aed1d23427ac77815eabcecea75_1534	c4610aa9a2d5bacd833356b3605d9b21_1522	f0f6386fb62ec3a09e34ad652cf53efb_2449	S_aureus_10_00533
WP_000727423.1		YlxR family protein	4	4	1	1	2105				284	284	284	0c5d6aed1d23427ac77815eabcecea75_2387	c4610aa9a2d5bacd833356b3605d9b21_2374	f0f6386fb62ec3a09e34ad652cf53efb_1594	S_aureus_10_00128
WP_001032814.1		hypothetical protein	4	4	1	1	2667				185	185	185	0c5d6aed1d23427ac77815eabcecea75_2164	c4610aa9a2d5bacd833356b3605d9b21_2153	f0f6386fb62ec3a09e34ad652cf53efb_1821	S_aureus_10_00236
WP_001157329.1		cytochrome c biogenesis protein	4	4	1	1	1257				815	815	815	0c5d6aed1d23427ac77815eabcecea75_3222	c4610aa9a2d5bacd833356b3605d9b21_3216	f0f6386fb62ec3a09e34ad652cf53efb_755	S_aureus_10_01753
WP_000082539.1		catalase	4	4	1	1	2029				1517	1517	1517	0c5d6aed1d23427ac77815eabcecea75_2539	c4610aa9a2d5bacd833356b3605d9b21_2532	f0f6386fb62ec3a09e34ad652cf53efb_1440	S_aureus_10_00053
WP_001065593.1		ATP phosphoribosyltransferase regulatory subunit	4	4	1	1	546				818	818	818	0c5d6aed1d23427ac77815eabcecea75_5581	c4610aa9a2d5bacd833356b3605d9b21_5580	f0f6386fb62ec3a09e34ad652cf53efb_4018	S_aureus_10_01186
pmtA		phenol-soluble modulin export ABC transporter ATP-binding protein PmtA	4	4	1	1	1044				896	896	896	0c5d6aed1d23427ac77815eabcecea75_4027	c4610aa9a2d5bacd833356b3605d9b21_4028	f0f6386fb62ec3a09e34ad652cf53efb_77	S_aureus_10_02135
WP_000739211.1		fibrinogen-binding protein	4	4	1	1	2662				317	317	317	0c5d6aed1d23427ac77815eabcecea75_2152	c4610aa9a2d5bacd833356b3605d9b21_2141	f0f6386fb62ec3a09e34ad652cf53efb_1833	S_aureus_10_00241
WP_001040736.1		GNAT family N-acetyltransferase	4	4	1	1	1754				860	860	860	0c5d6aed1d23427ac77815eabcecea75_4419	c4610aa9a2d5bacd833356b3605d9b21_4418	f0f6386fb62ec3a09e34ad652cf53efb_5182	S_aureus_10_02212
secY2		accessory Sec system protein translocase subunit SecY2	4	4	1	1	520				1211	1211	1211	0c5d6aed1d23427ac77815eabcecea75_5529	c4610aa9a2d5bacd833356b3605d9b21_5526	f0f6386fb62ec3a09e34ad652cf53efb_4070	S_aureus_10_01212
WP_045177919.1		MFS transporter	4	4	1	1	649				1388	1388	1388	0c5d6aed1d23427ac77815eabcecea75_157	c4610aa9a2d5bacd833356b3605d9b21_155	f0f6386fb62ec3a09e34ad652cf53efb_3836	S_aureus_10_01078
WP_001038103.1		DMT family transporter	4	4	1	1	652				872	872	872	0c5d6aed1d23427ac77815eabcecea75_165	c4610aa9a2d5bacd833356b3605d9b21_163	f0f6386fb62ec3a09e34ad652cf53efb_3828	S_aureus_10_01075
WP_000163283.1		type 1 glutamine amidotransferase	4	4	1	1	1504				515	515	515	0c5d6aed1d23427ac77815eabcecea75_3899	c4610aa9a2d5bacd833356b3605d9b21_3898	f0f6386fb62ec3a09e34ad652cf53efb_205	S_aureus_10_02077
mreC		rod shape-determining protein MreC	4	4	1	1	1242				842	842	842	0c5d6aed1d23427ac77815eabcecea75_3189	c4610aa9a2d5bacd833356b3605d9b21_3183	f0f6386fb62ec3a09e34ad652cf53efb_788	S_aureus_10_01740
WP_001289711.1		N-acetyltransferase	4	4	1	1	2683				440	440	440	0c5d6aed1d23427ac77815eabcecea75_2201	c4610aa9a2d5bacd833356b3605d9b21_2190	f0f6386fb62ec3a09e34ad652cf53efb_1780	S_aureus_10_00219
nadE		ammonia-dependent NAD(+) synthetase	4	4	1	1	1464				821	821	821	0c5d6aed1d23427ac77815eabcecea75_3981	c4610aa9a2d5bacd833356b3605d9b21_3980	f0f6386fb62ec3a09e34ad652cf53efb_123	S_aureus_10_02115
WP_000616885.1		phosphomevalonate kinase	4	4	1	1	2190				1076	1076	1076	0c5d6aed1d23427ac77815eabcecea75_1179	c4610aa9a2d5bacd833356b3605d9b21_1173	f0f6386fb62ec3a09e34ad652cf53efb_2804	S_aureus_10_00699
sbnA		2,3-diaminopropionate biosynthesis protein SbnA	4	4	1	1	661				980	980	980	0c5d6aed1d23427ac77815eabcecea75_183	c4610aa9a2d5bacd833356b3605d9b21_181	f0f6386fb62ec3a09e34ad652cf53efb_3810	S_aureus_10_01066
scn		complement inhibitor SCIN-A	4	4	1	1	1054				350	350	350	0c5d6aed1d23427ac77815eabcecea75_4049	c4610aa9a2d5bacd833356b3605d9b21_4048	f0f6386fb62ec3a09e34ad652cf53efb_55	S_aureus_10_02142
WP_000089942.1		insulinase family protein	4	4	1	1	2094				1265	1265	1265	0c5d6aed1d23427ac77815eabcecea75_2409	c4610aa9a2d5bacd833356b3605d9b21_2396	f0f6386fb62ec3a09e34ad652cf53efb_1572	S_aureus_10_00117
rpsT		30S ribosomal protein S20	4	4	1	1	1182				251	251	251	0c5d6aed1d23427ac77815eabcecea75_3061	c4610aa9a2d5bacd833356b3605d9b21_3055	f0f6386fb62ec3a09e34ad652cf53efb_916	S_aureus_10_01678
esxA		WXG100 family type VII secretion effector EsxA	4	4	1	1	368				293	293	293	0c5d6aed1d23427ac77815eabcecea75_519	c4610aa9a2d5bacd833356b3605d9b21_515	f0f6386fb62ec3a09e34ad652cf53efb_3468	S_aureus_10_00905
WP_000184739.1		iron ABC transporter permease	4	4	1	1	2245				1004	1004	1004	0c5d6aed1d23427ac77815eabcecea75_1295	c4610aa9a2d5bacd833356b3605d9b21_1285	f0f6386fb62ec3a09e34ad652cf53efb_2688	S_aureus_10_00645
WP_000808968.1		type B 50S ribosomal protein L31	4	4	1	1	1745				254	254	254	0c5d6aed1d23427ac77815eabcecea75_4401	c4610aa9a2d5bacd833356b3605d9b21_4400	f0f6386fb62ec3a09e34ad652cf53efb_5200	S_aureus_10_02221
WP_001248939.1		YvcK family protein	4	4	1	1	2366				995	995	995	0c5d6aed1d23427ac77815eabcecea75_1544	c4610aa9a2d5bacd833356b3605d9b21_1532	f0f6386fb62ec3a09e34ad652cf53efb_2439	S_aureus_10_00528
rplB		50S ribosomal protein L2	4	4	1	1	1859				833	833	833	0c5d6aed1d23427ac77815eabcecea75_4668	c4610aa9a2d5bacd833356b3605d9b21_4663	f0f6386fb62ec3a09e34ad652cf53efb_4929	S_aureus_10_01840
WP_000743714.1		ECF-type riboflavin transporter substrate-binding protein	4	4	1	1	551				554	554	554	0c5d6aed1d23427ac77815eabcecea75_5591	c4610aa9a2d5bacd833356b3605d9b21_5590	f0f6386fb62ec3a09e34ad652cf53efb_4008	S_aureus_10_01181
hslO		Hsp33 family molecular chaperone HslO	4	4	1	1	69				881	881	881	0c5d6aed1d23427ac77815eabcecea75_968	c4610aa9a2d5bacd833356b3605d9b21_962	f0f6386fb62ec3a09e34ad652cf53efb_3015	S_aureus_10_02547
yaaA		S4 domain-containing protein YaaA	4	4	1	1	581				236	245	240	0c5d6aed1d23427ac77815eabcecea75_7	c4610aa9a2d5bacd833356b3605d9b21_7	f0f6386fb62ec3a09e34ad652cf53efb_3950	S_aureus_10_01151
WP_000611512.1		phage holin	4	4	1	1	1059				254	254	254	0c5d6aed1d23427ac77815eabcecea75_4057	c4610aa9a2d5bacd833356b3605d9b21_4056	f0f6386fb62ec3a09e34ad652cf53efb_47	S_aureus_10_02146
WP_000185319.1		glycerophosphodiester phosphodiesterase	4	4	1	1	2465				929	929	929	0c5d6aed1d23427ac77815eabcecea75_1748	c4610aa9a2d5bacd833356b3605d9b21_1736	f0f6386fb62ec3a09e34ad652cf53efb_2237	S_aureus_10_00430
WP_045178090.1		M17 family metallopeptidase	4	4	1	1	2448				1475	1475	1475	0c5d6aed1d23427ac77815eabcecea75_1714	c4610aa9a2d5bacd833356b3605d9b21_1702	f0f6386fb62ec3a09e34ad652cf53efb_2271	S_aureus_10_00447
pflA		pyruvate formate-lyase-activating protein	4	4	1	1	765				755	755	755	0c5d6aed1d23427ac77815eabcecea75_393	c4610aa9a2d5bacd833356b3605d9b21_389	f0f6386fb62ec3a09e34ad652cf53efb_3600	S_aureus_10_00963
WP_000774684.1		demethylmenaquinone methyltransferase	4	4	1	1	270				725	725	725	0c5d6aed1d23427ac77815eabcecea75_2825	c4610aa9a2d5bacd833356b3605d9b21_2819	f0f6386fb62ec3a09e34ad652cf53efb_1156	S_aureus_10_01566
WP_001117046.1		DUF2188 domain-containing protein	4	4	1	1	883				416	416	416	0c5d6aed1d23427ac77815eabcecea75_5219	c4610aa9a2d5bacd833356b3605d9b21_5216	f0f6386fb62ec3a09e34ad652cf53efb_4380	S_aureus_10_01355
WP_001045421.1		alpha/beta hydrolase	4	4	1	1	2216				788	788	788	0c5d6aed1d23427ac77815eabcecea75_1233	c4610aa9a2d5bacd833356b3605d9b21_1227	f0f6386fb62ec3a09e34ad652cf53efb_2750	S_aureus_10_00675
WP_001549059.1		transposase	4	4	1	1	1394				143	143	143	0c5d6aed1d23427ac77815eabcecea75_3504	c4610aa9a2d5bacd833356b3605d9b21_3497	f0f6386fb62ec3a09e34ad652cf53efb_475	S_aureus_10_02059
WP_000026308.1		hypothetical protein	4	4	1	1	2085				215	215	215	0c5d6aed1d23427ac77815eabcecea75_2427	c4610aa9a2d5bacd833356b3605d9b21_2414	f0f6386fb62ec3a09e34ad652cf53efb_1554	S_aureus_10_00108
WP_000261115.1		A24 family peptidase	4	4	1	1	1248				707	707	707	0c5d6aed1d23427ac77815eabcecea75_3201	c4610aa9a2d5bacd833356b3605d9b21_3195	f0f6386fb62ec3a09e34ad652cf53efb_776	S_aureus_10_01744
yhaM		3'-5' exoribonuclease YhaM	4	4	1	1	1537				941	941	941	0c5d6aed1d23427ac77815eabcecea75_3738	c4610aa9a2d5bacd833356b3605d9b21_3737	f0f6386fb62ec3a09e34ad652cf53efb_369	S_aureus_10_02446
plsX		phosphate acyltransferase PlsX	4	4	1	1	2734				986	986	986	0c5d6aed1d23427ac77815eabcecea75_2307	c4610aa9a2d5bacd833356b3605d9b21_2294	f0f6386fb62ec3a09e34ad652cf53efb_1674	S_aureus_10_00166
WP_001080809.1		ABC transporter ATP-binding protein	4	4	1	1	2244				797	797	797	0c5d6aed1d23427ac77815eabcecea75_1293	c4610aa9a2d5bacd833356b3605d9b21_1283	f0f6386fb62ec3a09e34ad652cf53efb_2690	S_aureus_10_00646
WP_000951058.1		winged helix DNA-binding protein	4	4	1	1	1877				440	440	440	0c5d6aed1d23427ac77815eabcecea75_4706	c4610aa9a2d5bacd833356b3605d9b21_4701	f0f6386fb62ec3a09e34ad652cf53efb_4891	S_aureus_10_01857
glmS		glutamine--fructose-6-phosphate transaminase (isomerizing)	4	4	1	1	1775				1805	1805	1805	0c5d6aed1d23427ac77815eabcecea75_4467	c4610aa9a2d5bacd833356b3605d9b21_4464	f0f6386fb62ec3a09e34ad652cf53efb_5134	S_aureus_10_02191
WP_000503583.1		glutamate synthase subunit beta	4	4	1	1	111				1463	1463	1463	0c5d6aed1d23427ac77815eabcecea75_869	c4610aa9a2d5bacd833356b3605d9b21_863	f0f6386fb62ec3a09e34ad652cf53efb_3114	S_aureus_10_02500
cap8M		type 8 capsular polysaccharide synthesis protein Cap8M	4	4	1	1	706				557	557	557	0c5d6aed1d23427ac77815eabcecea75_275	c4610aa9a2d5bacd833356b3605d9b21_271	f0f6386fb62ec3a09e34ad652cf53efb_3718	S_aureus_10_01021
WP_001185421.1		MoxR family ATPase	4	4	1	1	828				791	791	791	0c5d6aed1d23427ac77815eabcecea75_2698	c4610aa9a2d5bacd833356b3605d9b21_2690	f0f6386fb62ec3a09e34ad652cf53efb_1283	S_aureus_10_01505
WP_000037508.1		DUF1433 domain-containing protein	4	4	1	1	917				419	419	419	0c5d6aed1d23427ac77815eabcecea75_5147	c4610aa9a2d5bacd833356b3605d9b21_5142	f0f6386fb62ec3a09e34ad652cf53efb_4450	S_aureus_10_01388
WP_001222133.1		hypothetical protein	4	4	1	1	2215				716	716	716	0c5d6aed1d23427ac77815eabcecea75_1231	c4610aa9a2d5bacd833356b3605d9b21_1225	f0f6386fb62ec3a09e34ad652cf53efb_2752	S_aureus_10_00676
WP_000542272.1		DUF262 domain-containing protein	4	4	1	1	168				1826	1826	1826	0c5d6aed1d23427ac77815eabcecea75_755	c4610aa9a2d5bacd833356b3605d9b21_749	f0f6386fb62ec3a09e34ad652cf53efb_3228	S_aureus_10_00792
WP_000148852.1		glucose-6-phosphate isomerase	4	4	1	1	2468				1331	1331	1331	0c5d6aed1d23427ac77815eabcecea75_1754	c4610aa9a2d5bacd833356b3605d9b21_1742	f0f6386fb62ec3a09e34ad652cf53efb_2231	S_aureus_10_00427
group_1922	lepB	signal peptidase I	4	4	1	1	2471				575	575	575	0c5d6aed1d23427ac77815eabcecea75_1760	c4610aa9a2d5bacd833356b3605d9b21_1748	f0f6386fb62ec3a09e34ad652cf53efb_2225	S_aureus_10_00424
WP_000067112.1		GNAT family N-acetyltransferase	4	4	1	1	871				284	284	284	0c5d6aed1d23427ac77815eabcecea75_5245	c4610aa9a2d5bacd833356b3605d9b21_5242	f0f6386fb62ec3a09e34ad652cf53efb_4354	S_aureus_10_01343
prmA		50S ribosomal protein L11 methyltransferase	4	4	1	1	1175				938	938	938	0c5d6aed1d23427ac77815eabcecea75_3047	c4610aa9a2d5bacd833356b3605d9b21_3041	f0f6386fb62ec3a09e34ad652cf53efb_930	S_aureus_10_01671
WP_000567030.1		tetratricopeptide repeat protein	4	4	1	1	1214				668	668	668	0c5d6aed1d23427ac77815eabcecea75_3127	c4610aa9a2d5bacd833356b3605d9b21_3121	f0f6386fb62ec3a09e34ad652cf53efb_850	S_aureus_10_01712
WP_000230294.1		hypothetical protein	4	4	1	1	991				182	182	182	0c5d6aed1d23427ac77815eabcecea75_4993	c4610aa9a2d5bacd833356b3605d9b21_4990	f0f6386fb62ec3a09e34ad652cf53efb_4604	S_aureus_10_01458
WP_061651008.1		TIGR01741 family protein	4	4	1	1	350				500	500	500	0c5d6aed1d23427ac77815eabcecea75_555	c4610aa9a2d5bacd833356b3605d9b21_549	f0f6386fb62ec3a09e34ad652cf53efb_3430	S_aureus_10_00887
ruvB		Holliday junction branch migration DNA helicase RuvB	4	4	1	1	1234				1004	1004	1004	0c5d6aed1d23427ac77815eabcecea75_3172	c4610aa9a2d5bacd833356b3605d9b21_3166	f0f6386fb62ec3a09e34ad652cf53efb_805	S_aureus_10_01732
WP_001044662.1		YitT family protein	4	4	1	1	2243				833	833	833	0c5d6aed1d23427ac77815eabcecea75_1291	c4610aa9a2d5bacd833356b3605d9b21_1281	f0f6386fb62ec3a09e34ad652cf53efb_2692	S_aureus_10_00647
sarV		HTH-type transcriptional regulator SarV	4	4	1	1	1879				350	350	350	0c5d6aed1d23427ac77815eabcecea75_4710	c4610aa9a2d5bacd833356b3605d9b21_4705	f0f6386fb62ec3a09e34ad652cf53efb_4887	S_aureus_10_01859
WP_001231451.1		diacylglycerol kinase	4	4	1	1	1479				947	947	947	0c5d6aed1d23427ac77815eabcecea75_3949	c4610aa9a2d5bacd833356b3605d9b21_3948	f0f6386fb62ec3a09e34ad652cf53efb_155	S_aureus_10_02100
WP_000032525.1		HK97 family phage prohead protease	4	4	1	1	1077				584	584	584	0c5d6aed1d23427ac77815eabcecea75_4095	c4610aa9a2d5bacd833356b3605d9b21_4094	f0f6386fb62ec3a09e34ad652cf53efb_9	S_aureus_10_02162
pxpA		5-oxoprolinase subunit PxpA	4	4	1	1	1199				752	752	752	0c5d6aed1d23427ac77815eabcecea75_3097	c4610aa9a2d5bacd833356b3605d9b21_3091	f0f6386fb62ec3a09e34ad652cf53efb_880	S_aureus_10_01697
WP_001030771.1		alpha/beta hydrolase	4	4	1	1	2252				1043	1043	1043	0c5d6aed1d23427ac77815eabcecea75_1309	c4610aa9a2d5bacd833356b3605d9b21_1299	f0f6386fb62ec3a09e34ad652cf53efb_2674	S_aureus_10_00638
WP_045177963.1		ABC transporter ATP-binding protein/permease	4	4	1	1	2281				1631	1631	1631	0c5d6aed1d23427ac77815eabcecea75_1369	c4610aa9a2d5bacd833356b3605d9b21_1359	f0f6386fb62ec3a09e34ad652cf53efb_2614	S_aureus_10_00609
WP_001077602.1		mechanosensitive ion channel family protein	4	4	1	1	204				881	881	881	0c5d6aed1d23427ac77815eabcecea75_682	c4610aa9a2d5bacd833356b3605d9b21_676	f0f6386fb62ec3a09e34ad652cf53efb_3301	S_aureus_10_00826
WP_086095170.1		globin domain-containing protein	4	4	1	1	778				1145	1145	1145	0c5d6aed1d23427ac77815eabcecea75_421	c4610aa9a2d5bacd833356b3605d9b21_417	f0f6386fb62ec3a09e34ad652cf53efb_3566	S_aureus_10_00950
WP_001148861.1		hypothetical protein	4	4	1	1	1634				197	197	197	0c5d6aed1d23427ac77815eabcecea75_4161	c4610aa9a2d5bacd833356b3605d9b21_4160	f0f6386fb62ec3a09e34ad652cf53efb_5440	S_aureus_10_02293
mecA		adaptor protein MecA	4	4	1	1	2503				719	719	719	0c5d6aed1d23427ac77815eabcecea75_1824	c4610aa9a2d5bacd833356b3605d9b21_1812	f0f6386fb62ec3a09e34ad652cf53efb_2161	S_aureus_10_00392
mcrC		5-methylcytosine-specific restriction endonuclease system specificity protein McrC	4	4	1	1	629				1034	1034	1034	0c5d6aed1d23427ac77815eabcecea75_117	c4610aa9a2d5bacd833356b3605d9b21_115	f0f6386fb62ec3a09e34ad652cf53efb_3876	S_aureus_10_01098
WP_000808817.1		hypothetical protein	4	4	1	1	1767				230	230	230	0c5d6aed1d23427ac77815eabcecea75_4445	c4610aa9a2d5bacd833356b3605d9b21_4444	f0f6386fb62ec3a09e34ad652cf53efb_5156	S_aureus_10_02199
WP_000401978.1		RusA family crossover junction endodeoxyribonuclease	4	4	1	1	1621				404	404	404	0c5d6aed1d23427ac77815eabcecea75_4135	c4610aa9a2d5bacd833356b3605d9b21_4134	f0f6386fb62ec3a09e34ad652cf53efb_5466	S_aureus_10_02280
WP_043044395.1		OsmC family protein	4	4	1	1	1308				446	446	446	0c5d6aed1d23427ac77815eabcecea75_3330	c4610aa9a2d5bacd833356b3605d9b21_3323	f0f6386fb62ec3a09e34ad652cf53efb_647	S_aureus_10_01980
WP_000170598.1		YktB family protein	4	4	1	1	2614				614	614	614	0c5d6aed1d23427ac77815eabcecea75_2054	c4610aa9a2d5bacd833356b3605d9b21_2043	f0f6386fb62ec3a09e34ad652cf53efb_1931	S_aureus_10_00286
WP_000822161.1		DUF4467 domain-containing protein	4	4	1	1	346				374	374	374	0c5d6aed1d23427ac77815eabcecea75_561	c4610aa9a2d5bacd833356b3605d9b21_555	f0f6386fb62ec3a09e34ad652cf53efb_3422	S_aureus_10_00884
WP_000473699.1		isoprenyl transferase	4	4	1	1	2112				770	770	770	0c5d6aed1d23427ac77815eabcecea75_2373	c4610aa9a2d5bacd833356b3605d9b21_2360	f0f6386fb62ec3a09e34ad652cf53efb_1608	S_aureus_10_00135
WP_000376235.1		MarR family transcriptional regulator	4	4	1	1	872				434	434	434	0c5d6aed1d23427ac77815eabcecea75_5243	c4610aa9a2d5bacd833356b3605d9b21_5240	f0f6386fb62ec3a09e34ad652cf53efb_4356	S_aureus_10_01344
WP_000606480.1		YlbF family regulator	4	4	1	1	2627				434	434	434	0c5d6aed1d23427ac77815eabcecea75_2080	c4610aa9a2d5bacd833356b3605d9b21_2069	f0f6386fb62ec3a09e34ad652cf53efb_1905	S_aureus_10_00274
WP_045178250.1		DUF5080 family protein	4	4	1	1	370				587	587	587	0c5d6aed1d23427ac77815eabcecea75_515	c4610aa9a2d5bacd833356b3605d9b21_511	f0f6386fb62ec3a09e34ad652cf53efb_3472	S_aureus_10_00907
WP_000911017.1		ABC transporter ATP-binding protein	4	4	1	1	340				677	677	677	0c5d6aed1d23427ac77815eabcecea75_573	c4610aa9a2d5bacd833356b3605d9b21_567	f0f6386fb62ec3a09e34ad652cf53efb_3410	S_aureus_10_00878
WP_000083807.1		PTS mannitol transporter subunit IICB	4	4	1	1	1776				1538	1538	1538	0c5d6aed1d23427ac77815eabcecea75_4469	c4610aa9a2d5bacd833356b3605d9b21_4466	f0f6386fb62ec3a09e34ad652cf53efb_5132	S_aureus_10_02190
WP_000780596.1		hypothetical protein	4	4	1	1	2050				194	194	194	0c5d6aed1d23427ac77815eabcecea75_2495	c4610aa9a2d5bacd833356b3605d9b21_2488	f0f6386fb62ec3a09e34ad652cf53efb_1484	S_aureus_10_00074
WP_000368687.1		hypothetical protein	4	4	1	1	2400				236	236	236	0c5d6aed1d23427ac77815eabcecea75_1617	c4610aa9a2d5bacd833356b3605d9b21_1603	f0f6386fb62ec3a09e34ad652cf53efb_2368	S_aureus_10_00494
WP_000049914.1		biotin--[acetyl-CoA-carboxylase] ligase	4	4	1	1	284				971	971	971	0c5d6aed1d23427ac77815eabcecea75_2797	c4610aa9a2d5bacd833356b3605d9b21_2791	f0f6386fb62ec3a09e34ad652cf53efb_1184	S_aureus_10_01552
WP_045177072.1		superantigen-like protein SSL2	4	4	1	1	158				695	695	695	0c5d6aed1d23427ac77815eabcecea75_775	c4610aa9a2d5bacd833356b3605d9b21_769	f0f6386fb62ec3a09e34ad652cf53efb_3208	S_aureus_10_00782
WP_000274855.1		VOC family protein	4	4	1	1	2701				797	797	797	0c5d6aed1d23427ac77815eabcecea75_2237	c4610aa9a2d5bacd833356b3605d9b21_2226	f0f6386fb62ec3a09e34ad652cf53efb_1744	S_aureus_10_00201
gcvT		glycine cleavage system aminomethyltransferase GcvT	4	4	1	1	1133				1091	1091	1091	0c5d6aed1d23427ac77815eabcecea75_2962	c4610aa9a2d5bacd833356b3605d9b21_2956	f0f6386fb62ec3a09e34ad652cf53efb_1015	S_aureus_10_01631
WP_000836419.1		amidohydrolase family protein	4	4	1	1	442				1010	1010	1010	0c5d6aed1d23427ac77815eabcecea75_5367	c4610aa9a2d5bacd833356b3605d9b21_5364	f0f6386fb62ec3a09e34ad652cf53efb_4232	S_aureus_10_01285
WP_000706114.1		PTS fructose transporter subunit IIABC	4	4	1	1	508				1952	1952	1952	0c5d6aed1d23427ac77815eabcecea75_5505	c4610aa9a2d5bacd833356b3605d9b21_5502	f0f6386fb62ec3a09e34ad652cf53efb_4094	S_aureus_10_01224
WP_000752909.1		CsbD family protein	4	4	1	1	1219				182	182	182	0c5d6aed1d23427ac77815eabcecea75_3137	c4610aa9a2d5bacd833356b3605d9b21_3131	f0f6386fb62ec3a09e34ad652cf53efb_840	S_aureus_10_01717
cozEa		cell elongation protein CozEa	4	4	1	1	2516				1085	1085	1085	0c5d6aed1d23427ac77815eabcecea75_1850	c4610aa9a2d5bacd833356b3605d9b21_1838	f0f6386fb62ec3a09e34ad652cf53efb_2135	S_aureus_10_00379
csbB		lipoteichoic acid-specific glycosylation protein CsbB	4	4	1	1	2301				983	983	983	0c5d6aed1d23427ac77815eabcecea75_1409	c4610aa9a2d5bacd833356b3605d9b21_1399	f0f6386fb62ec3a09e34ad652cf53efb_2574	S_aureus_10_00589
WP_000070866.1		DNA starvation/stationary phase protection protein	4	4	1	1	1764				443	443	443	0c5d6aed1d23427ac77815eabcecea75_4439	c4610aa9a2d5bacd833356b3605d9b21_4438	f0f6386fb62ec3a09e34ad652cf53efb_5162	S_aureus_10_02202
WP_000589549.1		arsenate reductase family protein	4	4	1	1	2408				356	356	356	0c5d6aed1d23427ac77815eabcecea75_1633	c4610aa9a2d5bacd833356b3605d9b21_1619	f0f6386fb62ec3a09e34ad652cf53efb_2352	S_aureus_10_00486
WP_001566611.1		hypothetical protein	4	4	1	1	2055				212	212	212	0c5d6aed1d23427ac77815eabcecea75_2487	c4610aa9a2d5bacd833356b3605d9b21_2478	f0f6386fb62ec3a09e34ad652cf53efb_1492	S_aureus_10_00078
WP_000215236.1		Asp23/Gls24 family envelope stress response protein	4	4	1	1	1803				509	509	509	0c5d6aed1d23427ac77815eabcecea75_4550	c4610aa9a2d5bacd833356b3605d9b21_4549	f0f6386fb62ec3a09e34ad652cf53efb_5047	S_aureus_10_01786
fusA		elongation factor G	4	4	1	1	32				2081	2081	2081	0c5d6aed1d23427ac77815eabcecea75_1091	c4610aa9a2d5bacd833356b3605d9b21_1085	f0f6386fb62ec3a09e34ad652cf53efb_2892	S_aureus_10_00744
WP_045177074.1		superantigen-like protein SSL3	4	4	1	1	157				1070	1070	1070	0c5d6aed1d23427ac77815eabcecea75_777	c4610aa9a2d5bacd833356b3605d9b21_771	f0f6386fb62ec3a09e34ad652cf53efb_3206	S_aureus_10_00781
group_1969	ssb	single-stranded DNA-binding protein	4	4	1	1	1624				470	470	470	0c5d6aed1d23427ac77815eabcecea75_4141	c4610aa9a2d5bacd833356b3605d9b21_4140	f0f6386fb62ec3a09e34ad652cf53efb_5460	S_aureus_10_02283
WP_000358498.1		hypothetical protein	4	4	1	1	2279				683	683	683	0c5d6aed1d23427ac77815eabcecea75_1365	c4610aa9a2d5bacd833356b3605d9b21_1355	f0f6386fb62ec3a09e34ad652cf53efb_2618	S_aureus_10_00611
WP_000597238.1		SAV1866 family putative multidrug efflux ABC transporter	4	4	1	1	1513				1736	1736	1736	0c5d6aed1d23427ac77815eabcecea75_3881	c4610aa9a2d5bacd833356b3605d9b21_3880	f0f6386fb62ec3a09e34ad652cf53efb_223	S_aureus_10_02068
WP_000902807.1		YisL family protein	4	4	1	1	2475				389	389	389	0c5d6aed1d23427ac77815eabcecea75_1768	c4610aa9a2d5bacd833356b3605d9b21_1756	f0f6386fb62ec3a09e34ad652cf53efb_2217	S_aureus_10_00420
thrC		threonine synthase	4	4	1	1	2034				1061	1061	1061	0c5d6aed1d23427ac77815eabcecea75_2527	c4610aa9a2d5bacd833356b3605d9b21_2520	f0f6386fb62ec3a09e34ad652cf53efb_1452	S_aureus_10_00058
WP_045178256.1		ABC transporter permease	4	4	1	1	375				920	920	920	0c5d6aed1d23427ac77815eabcecea75_505	c4610aa9a2d5bacd833356b3605d9b21_501	f0f6386fb62ec3a09e34ad652cf53efb_3482	S_aureus_10_00912
WP_000655703.1		aminotransferase class I/II-fold pyridoxal phosphate-dependent enzyme	4	4	1	1	206				1103	1103	1103	0c5d6aed1d23427ac77815eabcecea75_677	c4610aa9a2d5bacd833356b3605d9b21_671	f0f6386fb62ec3a09e34ad652cf53efb_3306	S_aureus_10_00828
rnhC		ribonuclease HIII	4	4	1	1	2648				938	938	938	0c5d6aed1d23427ac77815eabcecea75_2122	c4610aa9a2d5bacd833356b3605d9b21_2111	f0f6386fb62ec3a09e34ad652cf53efb_1863	S_aureus_10_00254
WP_000035058.1		peptidylprolyl isomerase	4	4	1	1	2460				593	593	593	0c5d6aed1d23427ac77815eabcecea75_1738	c4610aa9a2d5bacd833356b3605d9b21_1726	f0f6386fb62ec3a09e34ad652cf53efb_2247	S_aureus_10_00435
whiA		DNA-binding protein WhiA	4	4	1	1	2367				944	944	944	0c5d6aed1d23427ac77815eabcecea75_1546	c4610aa9a2d5bacd833356b3605d9b21_1534	f0f6386fb62ec3a09e34ad652cf53efb_2437	S_aureus_10_00527
WP_000600967.1		VOC family protein	4	4	1	1	1876				764	764	764	0c5d6aed1d23427ac77815eabcecea75_4704	c4610aa9a2d5bacd833356b3605d9b21_4699	f0f6386fb62ec3a09e34ad652cf53efb_4893	S_aureus_10_01856
WP_000705240.1		hypothetical protein	4	4	1	1	1641				182	182	182	0c5d6aed1d23427ac77815eabcecea75_4173	c4610aa9a2d5bacd833356b3605d9b21_4172	f0f6386fb62ec3a09e34ad652cf53efb_5428	S_aureus_10_02300
WP_045176825.1		hypothetical protein	4	4	1	1	691				767	767	767	0c5d6aed1d23427ac77815eabcecea75_245	c4610aa9a2d5bacd833356b3605d9b21_241	f0f6386fb62ec3a09e34ad652cf53efb_3748	S_aureus_10_01036
aroA		3-phosphoshikimate 1-carboxyvinyltransferase	4	4	1	1	276				1298	1298	1298	0c5d6aed1d23427ac77815eabcecea75_2813	c4610aa9a2d5bacd833356b3605d9b21_2807	f0f6386fb62ec3a09e34ad652cf53efb_1168	S_aureus_10_01560
ssb		single-stranded DNA-binding protein	4	4	1	1	199				503	503	503	0c5d6aed1d23427ac77815eabcecea75_692	c4610aa9a2d5bacd833356b3605d9b21_686	f0f6386fb62ec3a09e34ad652cf53efb_3291	S_aureus_10_00821
sirA		staphyloferrin B ABC transporter substrate-binding protein SirA	4	4	1	1	660				992	992	992	0c5d6aed1d23427ac77815eabcecea75_181	c4610aa9a2d5bacd833356b3605d9b21_179	f0f6386fb62ec3a09e34ad652cf53efb_3812	S_aureus_10_01067
WP_000138343.1		penicillin-binding protein	4	4	1	1	290				2183	2183	2183	0c5d6aed1d23427ac77815eabcecea75_2785	c4610aa9a2d5bacd833356b3605d9b21_2779	f0f6386fb62ec3a09e34ad652cf53efb_1196	S_aureus_10_01546
WP_000818525.1		amino acid permease	4	4	1	1	1283				1361	1361	1361	0c5d6aed1d23427ac77815eabcecea75_3278	c4610aa9a2d5bacd833356b3605d9b21_3271	f0f6386fb62ec3a09e34ad652cf53efb_699	S_aureus_10_01956
WP_001217295.1		hypothetical protein	4	4	1	1	2052				194	194	194	0c5d6aed1d23427ac77815eabcecea75_2493	c4610aa9a2d5bacd833356b3605d9b21_2486	f0f6386fb62ec3a09e34ad652cf53efb_1486	S_aureus_10_00075
WP_000450257.1		hemolysin family protein	4	4	1	1	2299				1349	1349	1349	0c5d6aed1d23427ac77815eabcecea75_1405	c4610aa9a2d5bacd833356b3605d9b21_1395	f0f6386fb62ec3a09e34ad652cf53efb_2578	S_aureus_10_00591
dhaK		dihydroxyacetone kinase subunit DhaK	4	4	1	1	2247				968	968	968	0c5d6aed1d23427ac77815eabcecea75_1299	c4610aa9a2d5bacd833356b3605d9b21_1289	f0f6386fb62ec3a09e34ad652cf53efb_2684	S_aureus_10_00643
WP_001249290.1		endonuclease MutS2	4	4	1	1	2652				2348	2348	2348	0c5d6aed1d23427ac77815eabcecea75_2130	c4610aa9a2d5bacd833356b3605d9b21_2119	f0f6386fb62ec3a09e34ad652cf53efb_1855	S_aureus_10_00250
mraZ		division/cell wall cluster transcriptional repressor MraZ	4	4	1	1	2685				431	431	431	0c5d6aed1d23427ac77815eabcecea75_2205	c4610aa9a2d5bacd833356b3605d9b21_2194	f0f6386fb62ec3a09e34ad652cf53efb_1776	S_aureus_10_00217
femB		glycine glycyltransferase FemB	4	4	1	1	1988				1259	1259	1259	0c5d6aed1d23427ac77815eabcecea75_2623	c4610aa9a2d5bacd833356b3605d9b21_2616	f0f6386fb62ec3a09e34ad652cf53efb_1356	S_aureus_10_00014
WP_000166899.1		sugar ABC transporter permease	4	4	1	1	754				1268	1268	1268	0c5d6aed1d23427ac77815eabcecea75_371	c4610aa9a2d5bacd833356b3605d9b21_367	f0f6386fb62ec3a09e34ad652cf53efb_3622	S_aureus_10_00974
WP_001154317.1		phage tail family protein	4	4	1	1	1066				1490	1490	1490	0c5d6aed1d23427ac77815eabcecea75_4073	c4610aa9a2d5bacd833356b3605d9b21_4072	f0f6386fb62ec3a09e34ad652cf53efb_31	S_aureus_10_02152
yidC		membrane protein insertase YidC	4	4	1	1	1716				872	872	872	0c5d6aed1d23427ac77815eabcecea75_4340	c4610aa9a2d5bacd833356b3605d9b21_4339	f0f6386fb62ec3a09e34ad652cf53efb_5261	S_aureus_10_02250
alsS		acetolactate synthase AlsS	4	4	1	1	1828				1664	1664	1664	0c5d6aed1d23427ac77815eabcecea75_4602	c4610aa9a2d5bacd833356b3605d9b21_4599	f0f6386fb62ec3a09e34ad652cf53efb_4995	S_aureus_10_01809
WP_000191459.1		hypothetical protein	4	4	1	1	1643				614	614	614	0c5d6aed1d23427ac77815eabcecea75_4177	c4610aa9a2d5bacd833356b3605d9b21_4176	f0f6386fb62ec3a09e34ad652cf53efb_5424	S_aureus_10_02302
WP_000184400.1		MBL fold metallo-hydrolase	4	4	1	1	474				686	686	686	0c5d6aed1d23427ac77815eabcecea75_5435	c4610aa9a2d5bacd833356b3605d9b21_5432	f0f6386fb62ec3a09e34ad652cf53efb_4164	S_aureus_10_01253
arcA		arginine deiminase	4	4	1	1	501				1235	1235	1235	0c5d6aed1d23427ac77815eabcecea75_5491	c4610aa9a2d5bacd833356b3605d9b21_5488	f0f6386fb62ec3a09e34ad652cf53efb_4108	S_aureus_10_01230
eap		MAP domain-containing protein	4	6	1.5	1	1050				254	1745	932	0c5d6aed1d23427ac77815eabcecea75_4039 0c5d6aed1d23427ac77815eabcecea75_4041	c4610aa9a2d5bacd833356b3605d9b21_4040	f0f6386fb62ec3a09e34ad652cf53efb_65 f0f6386fb62ec3a09e34ad652cf53efb_63	S_aureus_10_02140
nagA		N-acetylglucosamine-6-phosphate deacetylase	4	4	1	1	2298				1181	1181	1181	0c5d6aed1d23427ac77815eabcecea75_1403	c4610aa9a2d5bacd833356b3605d9b21_1393	f0f6386fb62ec3a09e34ad652cf53efb_2580	S_aureus_10_00592
mnhG1		Na+/H+ antiporter Mnh1 subunit G	4	4	1	1	2452				356	356	356	0c5d6aed1d23427ac77815eabcecea75_1722	c4610aa9a2d5bacd833356b3605d9b21_1710	f0f6386fb62ec3a09e34ad652cf53efb_2263	S_aureus_10_00443
WP_001808034.1		hypothetical protein	4	4	1	1	1820				125	125	125	0c5d6aed1d23427ac77815eabcecea75_4588	c4610aa9a2d5bacd833356b3605d9b21_4585	f0f6386fb62ec3a09e34ad652cf53efb_5009	S_aureus_10_01803
WP_045177982.1		CDP-glycerol glycerophosphotransferase family protein	4	4	1	1	2236				1103	1103	1103	0c5d6aed1d23427ac77815eabcecea75_1277	c4610aa9a2d5bacd833356b3605d9b21_1267	f0f6386fb62ec3a09e34ad652cf53efb_2706	S_aureus_10_00653
rpmI		50S ribosomal protein L35	4	4	1	1	1266				200	200	200	0c5d6aed1d23427ac77815eabcecea75_3240	c4610aa9a2d5bacd833356b3605d9b21_3234	f0f6386fb62ec3a09e34ad652cf53efb_737	S_aureus_10_01761
rbfA		30S ribosome-binding factor RbfA	4	4	1	1	2102				350	350	350	0c5d6aed1d23427ac77815eabcecea75_2393	c4610aa9a2d5bacd833356b3605d9b21_2380	f0f6386fb62ec3a09e34ad652cf53efb_1588	S_aureus_10_00125
WP_000923760.1		ABC transporter ATP-binding protein	4	4	1	1	488				755	755	755	0c5d6aed1d23427ac77815eabcecea75_5465	c4610aa9a2d5bacd833356b3605d9b21_5462	f0f6386fb62ec3a09e34ad652cf53efb_4134	S_aureus_10_01243
WP_045177083.1		type I restriction-modification system subunit M	4	4	1	1	149				1556	1556	1556	0c5d6aed1d23427ac77815eabcecea75_793	c4610aa9a2d5bacd833356b3605d9b21_787	f0f6386fb62ec3a09e34ad652cf53efb_3190	S_aureus_10_02619
WP_000664393.1		YbgA family protein	4	4	1	1	1015				383	383	383	0c5d6aed1d23427ac77815eabcecea75_4945	c4610aa9a2d5bacd833356b3605d9b21_4942	f0f6386fb62ec3a09e34ad652cf53efb_4652	S_aureus_10_01482
argF		ornithine carbamoyltransferase	4	4	1	1	500				1010	1010	1010	0c5d6aed1d23427ac77815eabcecea75_5489	c4610aa9a2d5bacd833356b3605d9b21_5486	f0f6386fb62ec3a09e34ad652cf53efb_4110	S_aureus_10_01231
sarR		HTH-type transcriptional regulator SarR	4	4	1	1	1907				347	347	347	0c5d6aed1d23427ac77815eabcecea75_4766	c4610aa9a2d5bacd833356b3605d9b21_4761	f0f6386fb62ec3a09e34ad652cf53efb_4831	S_aureus_10_01886
mscL		large conductance mechanosensitive channel protein MscL	4	4	1	1	2015				362	362	362	0c5d6aed1d23427ac77815eabcecea75_2569	c4610aa9a2d5bacd833356b3605d9b21_2562	f0f6386fb62ec3a09e34ad652cf53efb_1410	S_aureus_10_00040
dapA		4-hydroxy-tetrahydrodipicolinate synthase	4	4	1	1	836				887	887	887	0c5d6aed1d23427ac77815eabcecea75_2666	c4610aa9a2d5bacd833356b3605d9b21_2658	f0f6386fb62ec3a09e34ad652cf53efb_1315	S_aureus_10_02614
srrB		two-component system sensor histidine kinase SrrB	4	4	1	1	245				1751	1751	1751	0c5d6aed1d23427ac77815eabcecea75_2870	c4610aa9a2d5bacd833356b3605d9b21_2864	f0f6386fb62ec3a09e34ad652cf53efb_1107	S_aureus_10_01586
WP_000011688.1		sterile alpha motif-like domain-containing protein	4	4	1	1	470				212	212	212	0c5d6aed1d23427ac77815eabcecea75_5425	c4610aa9a2d5bacd833356b3605d9b21_5422	f0f6386fb62ec3a09e34ad652cf53efb_4174	S_aureus_10_01257
rplJ		50S ribosomal protein L10	4	4	1	1	40				500	500	500	0c5d6aed1d23427ac77815eabcecea75_1075	c4610aa9a2d5bacd833356b3605d9b21_1069	f0f6386fb62ec3a09e34ad652cf53efb_2908	S_aureus_10_00752
murB		UDP-N-acetylmuramate dehydrogenase	4	4	1	1	2335				923	923	923	0c5d6aed1d23427ac77815eabcecea75_1483	c4610aa9a2d5bacd833356b3605d9b21_1471	f0f6386fb62ec3a09e34ad652cf53efb_2500	S_aureus_10_00556
sfaB		staphyloferrin A synthetase SfaB	4	4	1	1	1800				1757	1757	1757	0c5d6aed1d23427ac77815eabcecea75_4544	c4610aa9a2d5bacd833356b3605d9b21_4543	f0f6386fb62ec3a09e34ad652cf53efb_5053	S_aureus_10_01783
deoD		purine-nucleoside phosphorylase	4	4	1	1	1763				710	710	710	0c5d6aed1d23427ac77815eabcecea75_4437	c4610aa9a2d5bacd833356b3605d9b21_4436	f0f6386fb62ec3a09e34ad652cf53efb_5164	S_aureus_10_02203
rseP		RIP metalloprotease RseP	4	4	1	1	2110				1286	1286	1286	0c5d6aed1d23427ac77815eabcecea75_2377	c4610aa9a2d5bacd833356b3605d9b21_2364	f0f6386fb62ec3a09e34ad652cf53efb_1604	S_aureus_10_00133
WP_001178619.1		NCS2 family nucleobase:cation symporter	4	4	1	1	2705				1307	1307	1307	0c5d6aed1d23427ac77815eabcecea75_2247	c4610aa9a2d5bacd833356b3605d9b21_2236	f0f6386fb62ec3a09e34ad652cf53efb_1734	S_aureus_10_00196
yqeH		ribosome biogenesis GTPase YqeH	4	4	1	1	1193				1100	1100	1100	0c5d6aed1d23427ac77815eabcecea75_3083	c4610aa9a2d5bacd833356b3605d9b21_3077	f0f6386fb62ec3a09e34ad652cf53efb_894	S_aureus_10_01689
WP_000106185.1		MarR family winged helix-turn-helix transcriptional regulator	4	4	1	1	494				455	455	455	0c5d6aed1d23427ac77815eabcecea75_5477	c4610aa9a2d5bacd833356b3605d9b21_5474	f0f6386fb62ec3a09e34ad652cf53efb_4122	S_aureus_10_01237
arlS		sensor histidine kinase ArlS	4	4	1	1	823				1355	1355	1355	0c5d6aed1d23427ac77815eabcecea75_2708	c4610aa9a2d5bacd833356b3605d9b21_2700	f0f6386fb62ec3a09e34ad652cf53efb_1273	S_aureus_10_01510
WP_000034973.1		maltodextrin ABC transporter substrate-binding protein	4	4	1	1	753				1271	1271	1271	0c5d6aed1d23427ac77815eabcecea75_369	c4610aa9a2d5bacd833356b3605d9b21_365	f0f6386fb62ec3a09e34ad652cf53efb_3624	S_aureus_10_00975
lepB		signal peptidase I	4	4	1	1	2470				524	524	524	0c5d6aed1d23427ac77815eabcecea75_1758	c4610aa9a2d5bacd833356b3605d9b21_1746	f0f6386fb62ec3a09e34ad652cf53efb_2227	S_aureus_10_00425
WP_001177186.1		hypothetical protein	4	4	1	1	858				203	203	203	0c5d6aed1d23427ac77815eabcecea75_5273	c4610aa9a2d5bacd833356b3605d9b21_5270	f0f6386fb62ec3a09e34ad652cf53efb_4326	S_aureus_10_01330
leuB		3-isopropylmalate dehydrogenase	4	4	1	1	1683				1046	1046	1046	0c5d6aed1d23427ac77815eabcecea75_4259	c4610aa9a2d5bacd833356b3605d9b21_4258	f0f6386fb62ec3a09e34ad652cf53efb_5342	S_aureus_10_02340
WP_000251253.1		DUF402 domain-containing protein	4	4	1	1	1512				542	542	542	0c5d6aed1d23427ac77815eabcecea75_3883	c4610aa9a2d5bacd833356b3605d9b21_3882	f0f6386fb62ec3a09e34ad652cf53efb_221	S_aureus_10_02069
WP_001051556.1		hypothetical protein	4	4	1	1	1939				506	506	506	0c5d6aed1d23427ac77815eabcecea75_4830	c4610aa9a2d5bacd833356b3605d9b21_4825	f0f6386fb62ec3a09e34ad652cf53efb_4767	S_aureus_10_01916
WP_000145511.1		replication initiation protein	4	4	1	2	5				860	860	860	0c5d6aed1d23427ac77815eabcecea75_5686	c4610aa9a2d5bacd833356b3605d9b21_5667	f0f6386fb62ec3a09e34ad652cf53efb_5537	S_aureus_10_02580
WP_045176870.1		lantibiotic dehydratase	4	4	1	1	1417				2993	2993	2993	0c5d6aed1d23427ac77815eabcecea75_3548	c4610aa9a2d5bacd833356b3605d9b21_3543	f0f6386fb62ec3a09e34ad652cf53efb_431	S_aureus_10_02358
WP_000602053.1		ABC-F family ATP-binding cassette domain-containing protein	4	4	1	1	1670				1928	1928	1928	0c5d6aed1d23427ac77815eabcecea75_4233	c4610aa9a2d5bacd833356b3605d9b21_4232	f0f6386fb62ec3a09e34ad652cf53efb_5368	S_aureus_10_02329
WP_000411301.1		kinase/pyrophosphorylase	4	4	1	1	1160				818	818	818	0c5d6aed1d23427ac77815eabcecea75_3017	c4610aa9a2d5bacd833356b3605d9b21_3011	f0f6386fb62ec3a09e34ad652cf53efb_960	S_aureus_10_01656
splD		serine protease SplD	4	4	1	1	1406				719	719	719	0c5d6aed1d23427ac77815eabcecea75_3526	c4610aa9a2d5bacd833356b3605d9b21_3521	f0f6386fb62ec3a09e34ad652cf53efb_453	S_aureus_10_02347
WP_001548498.1		YggS family pyridoxal phosphate-dependent enzyme	4	4	1	1	2695				668	668	668	0c5d6aed1d23427ac77815eabcecea75_2225	c4610aa9a2d5bacd833356b3605d9b21_2214	f0f6386fb62ec3a09e34ad652cf53efb_1756	S_aureus_10_00207
WP_000018608.1		cell division protein SepF	4	4	1	1	2696				563	563	563	0c5d6aed1d23427ac77815eabcecea75_2227	c4610aa9a2d5bacd833356b3605d9b21_2216	f0f6386fb62ec3a09e34ad652cf53efb_1754	S_aureus_10_00206
rbsK		ribokinase	4	4	1	1	807				914	914	914	0c5d6aed1d23427ac77815eabcecea75_483	c4610aa9a2d5bacd833356b3605d9b21_479	f0f6386fb62ec3a09e34ad652cf53efb_3504	S_aureus_10_00922
WP_000603497.1		hypothetical protein	4	4	1	1	525				359	359	359	0c5d6aed1d23427ac77815eabcecea75_5539	c4610aa9a2d5bacd833356b3605d9b21_5536	f0f6386fb62ec3a09e34ad652cf53efb_4060	S_aureus_10_01207
WP_000070966.1		1,4-dihydroxy-2-naphthoate polyprenyltransferase	4	4	1	1	2547				938	938	938	0c5d6aed1d23427ac77815eabcecea75_1919	c4610aa9a2d5bacd833356b3605d9b21_1906	f0f6386fb62ec3a09e34ad652cf53efb_2066	S_aureus_10_00350
greA		transcription elongation factor GreA	4	4	1	1	1204				476	476	476	0c5d6aed1d23427ac77815eabcecea75_3107	c4610aa9a2d5bacd833356b3605d9b21_3101	f0f6386fb62ec3a09e34ad652cf53efb_870	S_aureus_10_01702
atpB		F0F1 ATP synthase subunit A	4	4	1	1	1734				728	728	728	0c5d6aed1d23427ac77815eabcecea75_4379	c4610aa9a2d5bacd833356b3605d9b21_4378	f0f6386fb62ec3a09e34ad652cf53efb_5222	S_aureus_10_02232
frr		ribosome recycling factor	4	4	1	1	2113				554	554	554	0c5d6aed1d23427ac77815eabcecea75_2371	c4610aa9a2d5bacd833356b3605d9b21_2358	f0f6386fb62ec3a09e34ad652cf53efb_1610	S_aureus_10_00136
WP_000610979.1		GNAT family N-acetyltransferase	4	4	1	1	548				497	497	497	0c5d6aed1d23427ac77815eabcecea75_5585	c4610aa9a2d5bacd833356b3605d9b21_5584	f0f6386fb62ec3a09e34ad652cf53efb_4014	S_aureus_10_01184
ilvB		biosynthetic-type acetolactate synthase large subunit	4	4	1	1	1679				1769	1769	1769	0c5d6aed1d23427ac77815eabcecea75_4251	c4610aa9a2d5bacd833356b3605d9b21_4250	f0f6386fb62ec3a09e34ad652cf53efb_5350	S_aureus_10_02336
WP_000751703.1		hypothetical protein	4	4	1	1	2718				953	953	953	0c5d6aed1d23427ac77815eabcecea75_2275	c4610aa9a2d5bacd833356b3605d9b21_2262	f0f6386fb62ec3a09e34ad652cf53efb_1706	S_aureus_10_00182
WP_000174053.1		phosphoribosylaminoimidazolesuccinocarboxamide synthase	4	4	1	1	2573				704	704	704	0c5d6aed1d23427ac77815eabcecea75_1973	c4610aa9a2d5bacd833356b3605d9b21_1960	f0f6386fb62ec3a09e34ad652cf53efb_2012	S_aureus_10_00326
rpsA		30S ribosomal protein S1	4	4	1	1	265				1175	1175	1175	0c5d6aed1d23427ac77815eabcecea75_2835	c4610aa9a2d5bacd833356b3605d9b21_2829	f0f6386fb62ec3a09e34ad652cf53efb_1146	S_aureus_10_01571
WP_000655877.1		DUF5081 family protein	4	4	1	1	360				674	674	674	0c5d6aed1d23427ac77815eabcecea75_535	c4610aa9a2d5bacd833356b3605d9b21_531	f0f6386fb62ec3a09e34ad652cf53efb_3452	S_aureus_10_00897
trpC		indole-3-glycerol phosphate synthase TrpC	4	4	1	1	1993				782	782	782	0c5d6aed1d23427ac77815eabcecea75_2613	c4610aa9a2d5bacd833356b3605d9b21_2606	f0f6386fb62ec3a09e34ad652cf53efb_1366	S_aureus_10_00019
WP_045178193.1		fructosamine kinase family protein	4	4	1	1	450				866	866	866	0c5d6aed1d23427ac77815eabcecea75_5383	c4610aa9a2d5bacd833356b3605d9b21_5380	f0f6386fb62ec3a09e34ad652cf53efb_4216	S_aureus_10_01277
WP_045177056.1		glycosyltransferase	4	4	1	1	2165				1490	1490	1490	0c5d6aed1d23427ac77815eabcecea75_1127	c4610aa9a2d5bacd833356b3605d9b21_1121	f0f6386fb62ec3a09e34ad652cf53efb_2856	S_aureus_10_00725
gpsB		cell division regulator GpsB	4	4	1	1	295				344	344	344	0c5d6aed1d23427ac77815eabcecea75_2775	c4610aa9a2d5bacd833356b3605d9b21_2769	f0f6386fb62ec3a09e34ad652cf53efb_1206	S_aureus_10_01542
WP_000138475.1		recombinase RecT	4	4	1	1	1626				920	920	920	0c5d6aed1d23427ac77815eabcecea75_4145	c4610aa9a2d5bacd833356b3605d9b21_4144	f0f6386fb62ec3a09e34ad652cf53efb_5456	S_aureus_10_02285
gcvH		glycine cleavage system protein GcvH	4	4	1	1	2409				380	380	380	0c5d6aed1d23427ac77815eabcecea75_1635	c4610aa9a2d5bacd833356b3605d9b21_1621	f0f6386fb62ec3a09e34ad652cf53efb_2350	S_aureus_10_00485
gap		type I glyceraldehyde-3-phosphate dehydrogenase	4	4	1	1	1274				1025	1025	1025	0c5d6aed1d23427ac77815eabcecea75_3258	c4610aa9a2d5bacd833356b3605d9b21_3251	f0f6386fb62ec3a09e34ad652cf53efb_719	S_aureus_10_01768
WP_000394698.1		hypothetical protein	4	4	1	1	178				662	662	662	0c5d6aed1d23427ac77815eabcecea75_732	c4610aa9a2d5bacd833356b3605d9b21_728	f0f6386fb62ec3a09e34ad652cf53efb_3251	S_aureus_10_00803
hemA		glutamyl-tRNA reductase	4	4	1	1	1258				1346	1346	1346	0c5d6aed1d23427ac77815eabcecea75_3224	c4610aa9a2d5bacd833356b3605d9b21_3218	f0f6386fb62ec3a09e34ad652cf53efb_753	S_aureus_10_01754
WP_000289136.1		GTP pyrophosphokinase family protein	4	4	1	1	884				692	692	692	0c5d6aed1d23427ac77815eabcecea75_5217	c4610aa9a2d5bacd833356b3605d9b21_5214	f0f6386fb62ec3a09e34ad652cf53efb_4382	S_aureus_10_01356
grpE		nucleotide exchange factor GrpE	4	4	1	1	1178				626	626	626	0c5d6aed1d23427ac77815eabcecea75_3053	c4610aa9a2d5bacd833356b3605d9b21_3047	f0f6386fb62ec3a09e34ad652cf53efb_924	S_aureus_10_01674
WP_045178339.1		glycerophosphoryl diester phosphodiesterase membrane domain-containing protein	4	4	1	1	766				1763	1763	1763	0c5d6aed1d23427ac77815eabcecea75_395	c4610aa9a2d5bacd833356b3605d9b21_391	f0f6386fb62ec3a09e34ad652cf53efb_3598	S_aureus_10_00962
WP_000919026.1		phage terminase small subunit P27 family	4	4	1	1	1081				467	467	467	0c5d6aed1d23427ac77815eabcecea75_4103	c4610aa9a2d5bacd833356b3605d9b21_4102	f0f6386fb62ec3a09e34ad652cf53efb_5498	S_aureus_10_02166
WP_000584398.1		hypothetical protein	4	4	1	1	2664				506	506	506	0c5d6aed1d23427ac77815eabcecea75_2158	c4610aa9a2d5bacd833356b3605d9b21_2147	f0f6386fb62ec3a09e34ad652cf53efb_1827	S_aureus_10_00239
WP_001005407.1		hypothetical protein	4	4	1	1	1503				161	161	161	0c5d6aed1d23427ac77815eabcecea75_3901	c4610aa9a2d5bacd833356b3605d9b21_3900	f0f6386fb62ec3a09e34ad652cf53efb_203	S_aureus_10_02078
cvfB		RNA-binding virulence regulatory protein CvfB	4	4	1	1	832				902	902	902	0c5d6aed1d23427ac77815eabcecea75_2657	c4610aa9a2d5bacd833356b3605d9b21_2650	f0f6386fb62ec3a09e34ad652cf53efb_1324	S_aureus_10_02618
WP_000691833.1		LysR family transcriptional regulator	4	4	1	1	1946				884	884	884	0c5d6aed1d23427ac77815eabcecea75_4845	c4610aa9a2d5bacd833356b3605d9b21_4840	f0f6386fb62ec3a09e34ad652cf53efb_4752	S_aureus_10_01923
rpsR		30S ribosomal protein S18	4	4	1	1	198				242	242	242	0c5d6aed1d23427ac77815eabcecea75_694	c4610aa9a2d5bacd833356b3605d9b21_688	f0f6386fb62ec3a09e34ad652cf53efb_3289	S_aureus_10_00820
hssS		heme sensor histidine kinase HssS	4	4	1	1	1032				1373	1373	1373	0c5d6aed1d23427ac77815eabcecea75_4911	c4610aa9a2d5bacd833356b3605d9b21_4908	f0f6386fb62ec3a09e34ad652cf53efb_4686	S_aureus_10_01498
cap8E		type 8 capsular polysaccharide synthesis protein Cap8E	4	4	1	1	698				1028	1028	1028	0c5d6aed1d23427ac77815eabcecea75_259	c4610aa9a2d5bacd833356b3605d9b21_255	f0f6386fb62ec3a09e34ad652cf53efb_3734	S_aureus_10_01029
WP_000423531.1		DUF2992 family protein	4	4	1	1	164				407	407	407	0c5d6aed1d23427ac77815eabcecea75_763	c4610aa9a2d5bacd833356b3605d9b21_757	f0f6386fb62ec3a09e34ad652cf53efb_3220	S_aureus_10_00788
ftsW		cell division protein FtsW	4	4	1	1	2621				1226	1226	1226	0c5d6aed1d23427ac77815eabcecea75_2068	c4610aa9a2d5bacd833356b3605d9b21_2057	f0f6386fb62ec3a09e34ad652cf53efb_1917	S_aureus_10_00280
WP_000897132.1		ATP-dependent Clp protease ATP-binding subunit	4	4	1	1	55				2456	2456	2456	0c5d6aed1d23427ac77815eabcecea75_1044	c4610aa9a2d5bacd833356b3605d9b21_1038	f0f6386fb62ec3a09e34ad652cf53efb_2939	S_aureus_10_00766
WP_045177684.1		osmoprotectant ABC transporter substrate-binding protein	4	4	1	1	947				941	941	941	0c5d6aed1d23427ac77815eabcecea75_5087	c4610aa9a2d5bacd833356b3605d9b21_5082	f0f6386fb62ec3a09e34ad652cf53efb_4510	S_aureus_10_01416
menE		o-succinylbenzoate--CoA ligase	4	4	1	1	1383				1478	1478	1478	0c5d6aed1d23427ac77815eabcecea75_3482	c4610aa9a2d5bacd833356b3605d9b21_3475	f0f6386fb62ec3a09e34ad652cf53efb_495	S_aureus_10_02049
WP_000206033.1		acyl-CoA thioesterase	4	4	1	1	400				410	410	410	0c5d6aed1d23427ac77815eabcecea75_5281	c4610aa9a2d5bacd833356b3605d9b21_5278	f0f6386fb62ec3a09e34ad652cf53efb_4318	S_aureus_10_01326
yfkAB		radical SAM/CxCxxxxC motif protein YfkAB	4	4	1	1	1502				1151	1151	1151	0c5d6aed1d23427ac77815eabcecea75_3903	c4610aa9a2d5bacd833356b3605d9b21_3902	f0f6386fb62ec3a09e34ad652cf53efb_201	S_aureus_10_02079
WP_045176830.1		DNA-binding protein	4	4	1	1	689				1544	1544	1544	0c5d6aed1d23427ac77815eabcecea75_241	c4610aa9a2d5bacd833356b3605d9b21_237	f0f6386fb62ec3a09e34ad652cf53efb_3752	S_aureus_10_01038
fabZ		3-hydroxyacyl-ACP dehydratase FabZ	4	4	1	1	1724				440	440	440	0c5d6aed1d23427ac77815eabcecea75_4357	c4610aa9a2d5bacd833356b3605d9b21_4356	f0f6386fb62ec3a09e34ad652cf53efb_5244	S_aureus_10_02242
yqeK		bis(5'-nucleosyl)-tetraphosphatase (symmetrical) YqeK	4	4	1	1	1189				584	584	584	0c5d6aed1d23427ac77815eabcecea75_3075	c4610aa9a2d5bacd833356b3605d9b21_3069	f0f6386fb62ec3a09e34ad652cf53efb_902	S_aureus_10_01685
WP_000450555.1		heptaprenyl diphosphate synthase component 1	4	4	1	1	269				572	572	572	0c5d6aed1d23427ac77815eabcecea75_2827	c4610aa9a2d5bacd833356b3605d9b21_2821	f0f6386fb62ec3a09e34ad652cf53efb_1154	S_aureus_10_01567
WP_000836465.1		rhodanese-like domain-containing protein	4	4	1	1	1348				311	311	311	0c5d6aed1d23427ac77815eabcecea75_3410	c4610aa9a2d5bacd833356b3605d9b21_3403	f0f6386fb62ec3a09e34ad652cf53efb_567	S_aureus_10_02015
WP_000110600.1		hypothetical protein	4	4	1	1	1169				698	698	698	0c5d6aed1d23427ac77815eabcecea75_3035	c4610aa9a2d5bacd833356b3605d9b21_3029	f0f6386fb62ec3a09e34ad652cf53efb_942	S_aureus_10_01665
WP_000604727.1		hypothetical protein	4	4	1	1	491				200	200	200	0c5d6aed1d23427ac77815eabcecea75_5471	c4610aa9a2d5bacd833356b3605d9b21_5468	f0f6386fb62ec3a09e34ad652cf53efb_4128	S_aureus_10_01240
WP_000436820.1		DUF805 domain-containing protein	4	4	1	1	1956				620	620	620	0c5d6aed1d23427ac77815eabcecea75_4867	c4610aa9a2d5bacd833356b3605d9b21_4862	f0f6386fb62ec3a09e34ad652cf53efb_4730	S_aureus_10_01932
WP_000255553.1		LysE/ArgO family amino acid transporter	4	4	1	1	2402				617	617	617	0c5d6aed1d23427ac77815eabcecea75_1621	c4610aa9a2d5bacd833356b3605d9b21_1607	f0f6386fb62ec3a09e34ad652cf53efb_2364	S_aureus_10_00492
WP_000980137.1		hypothetical protein	4	4	1	1	2251				1067	1067	1067	0c5d6aed1d23427ac77815eabcecea75_1307	c4610aa9a2d5bacd833356b3605d9b21_1297	f0f6386fb62ec3a09e34ad652cf53efb_2676	S_aureus_10_00639
WP_000381849.1		cytochrome ubiquinol oxidase subunit I	4	4	1	1	2593				1361	1361	1361	0c5d6aed1d23427ac77815eabcecea75_2012	c4610aa9a2d5bacd833356b3605d9b21_2001	f0f6386fb62ec3a09e34ad652cf53efb_1973	S_aureus_10_00306
gtfA		accessory Sec system glycosyltransferase GtfA	4	4	1	1	515				1508	1508	1508	0c5d6aed1d23427ac77815eabcecea75_5519	c4610aa9a2d5bacd833356b3605d9b21_5516	f0f6386fb62ec3a09e34ad652cf53efb_4080	S_aureus_10_01217
WP_000762708.1		putative metal homeostasis protein	4	4	1	1	978				104	104	104	0c5d6aed1d23427ac77815eabcecea75_5021	c4610aa9a2d5bacd833356b3605d9b21_5016	f0f6386fb62ec3a09e34ad652cf53efb_4576	S_aureus_10_01446
WP_000148335.1		DnaD domain-containing protein	4	4	1	1	1623				893	893	893	0c5d6aed1d23427ac77815eabcecea75_4139	c4610aa9a2d5bacd833356b3605d9b21_4138	f0f6386fb62ec3a09e34ad652cf53efb_5462	S_aureus_10_02282
WP_000080028.1		response regulator transcription factor	4	4	1	1	1280				704	704	704	0c5d6aed1d23427ac77815eabcecea75_3272	c4610aa9a2d5bacd833356b3605d9b21_3265	f0f6386fb62ec3a09e34ad652cf53efb_705	S_aureus_10_01953
mutM		bifunctional DNA-formamidopyrimidine glycosylase/DNA-(apurinic or apyrimidinic site) lyase	4	4	1	1	1276				872	872	872	0c5d6aed1d23427ac77815eabcecea75_3264	c4610aa9a2d5bacd833356b3605d9b21_3257	f0f6386fb62ec3a09e34ad652cf53efb_713	S_aureus_10_01949
WP_000620949.1		GNAT family N-acetyltransferase	4	4	1	1	2546				551	551	551	0c5d6aed1d23427ac77815eabcecea75_1917	c4610aa9a2d5bacd833356b3605d9b21_1904	f0f6386fb62ec3a09e34ad652cf53efb_2068	S_aureus_10_00351
WP_000364542.1		adenine phosphoribosyltransferase	4	4	1	1	1228				518	518	518	0c5d6aed1d23427ac77815eabcecea75_3160	c4610aa9a2d5bacd833356b3605d9b21_3154	f0f6386fb62ec3a09e34ad652cf53efb_817	S_aureus_10_01726
group_2094	lpdA	dihydrolipoyl dehydrogenase	4	4	1	1	2604				1406	1406	1406	0c5d6aed1d23427ac77815eabcecea75_2034	c4610aa9a2d5bacd833356b3605d9b21_2023	f0f6386fb62ec3a09e34ad652cf53efb_1951	S_aureus_10_00296
WP_000498572.1		threonine/serine exporter family protein	4	4	1	1	2183				452	452	452	0c5d6aed1d23427ac77815eabcecea75_1165	c4610aa9a2d5bacd833356b3605d9b21_1159	f0f6386fb62ec3a09e34ad652cf53efb_2818	S_aureus_10_00706
WP_001549718.1		YdcF family protein	4	4	1	1	1972				968	968	968	0c5d6aed1d23427ac77815eabcecea75_4899	c4610aa9a2d5bacd833356b3605d9b21_4894	f0f6386fb62ec3a09e34ad652cf53efb_4698	S_aureus_10_01947
WP_045177516.1		MepB family protein	4	4	1	1	313				440	440	440	0c5d6aed1d23427ac77815eabcecea75_629	c4610aa9a2d5bacd833356b3605d9b21_623	f0f6386fb62ec3a09e34ad652cf53efb_3354	S_aureus_10_00852
WP_045178274.1		response regulator transcription factor LytR	4	4	1	1	799				740	740	740	0c5d6aed1d23427ac77815eabcecea75_467	c4610aa9a2d5bacd833356b3605d9b21_463	f0f6386fb62ec3a09e34ad652cf53efb_3520	S_aureus_10_00929
WP_001288675.1		esterase family protein	4	4	1	1	2518				758	758	758	0c5d6aed1d23427ac77815eabcecea75_1854	c4610aa9a2d5bacd833356b3605d9b21_1842	f0f6386fb62ec3a09e34ad652cf53efb_2131	S_aureus_10_00377
WP_000662030.1		tRNA-dihydrouridine synthase	4	4	1	1	634				932	986	972	0c5d6aed1d23427ac77815eabcecea75_125	c4610aa9a2d5bacd833356b3605d9b21_123	f0f6386fb62ec3a09e34ad652cf53efb_3868	S_aureus_10_01093
WP_001224793.1		acetyltransferase	4	4	1	1	2362				485	485	485	0c5d6aed1d23427ac77815eabcecea75_1536	c4610aa9a2d5bacd833356b3605d9b21_1524	f0f6386fb62ec3a09e34ad652cf53efb_2447	S_aureus_10_00532
spn		myeloperoxidase inhibitor SPIN	4	4	1	1	145				308	308	308	0c5d6aed1d23427ac77815eabcecea75_801	c4610aa9a2d5bacd833356b3605d9b21_795	f0f6386fb62ec3a09e34ad652cf53efb_3182	S_aureus_10_02529
WP_000894032.1		YbbR-like domain-containing protein	4	4	1	1	1782				932	932	932	0c5d6aed1d23427ac77815eabcecea75_4481	c4610aa9a2d5bacd833356b3605d9b21_4478	f0f6386fb62ec3a09e34ad652cf53efb_5120	S_aureus_10_02184
WP_045177931.1		DMT family transporter	4	4	1	1	2326				866	866	866	0c5d6aed1d23427ac77815eabcecea75_1463	c4610aa9a2d5bacd833356b3605d9b21_1451	f0f6386fb62ec3a09e34ad652cf53efb_2520	S_aureus_10_00565
WP_000924220.1		deoxyribonuclease IV	4	4	1	1	1154				890	890	890	0c5d6aed1d23427ac77815eabcecea75_3005	c4610aa9a2d5bacd833356b3605d9b21_2999	f0f6386fb62ec3a09e34ad652cf53efb_972	S_aureus_10_01650
WP_000684143.1		FAD-dependent monooxygenase	4	4	1	1	1918				1124	1124	1124	0c5d6aed1d23427ac77815eabcecea75_4788	c4610aa9a2d5bacd833356b3605d9b21_4783	f0f6386fb62ec3a09e34ad652cf53efb_4809	S_aureus_10_01896
WP_001092004.1		DUF2294 domain-containing protein	4	4	1	1	720				359	359	359	0c5d6aed1d23427ac77815eabcecea75_303	c4610aa9a2d5bacd833356b3605d9b21_299	f0f6386fb62ec3a09e34ad652cf53efb_3690	S_aureus_10_01007
mnhE1		Na+/H+ antiporter Mnh1 subunit E	4	4	1	1	2454				479	479	479	0c5d6aed1d23427ac77815eabcecea75_1726	c4610aa9a2d5bacd833356b3605d9b21_1714	f0f6386fb62ec3a09e34ad652cf53efb_2259	S_aureus_10_00441
WP_000975314.1		head-tail adaptor protein	4	4	1	1	1073				335	335	335	0c5d6aed1d23427ac77815eabcecea75_4087	c4610aa9a2d5bacd833356b3605d9b21_4086	f0f6386fb62ec3a09e34ad652cf53efb_17	S_aureus_10_02158
dat		D-amino-acid transaminase	4	4	1	1	1341				848	848	848	0c5d6aed1d23427ac77815eabcecea75_3396	c4610aa9a2d5bacd833356b3605d9b21_3389	f0f6386fb62ec3a09e34ad652cf53efb_581	S_aureus_10_02008
WP_001234989.1		RNA-binding S4 domain-containing protein	4	4	1	1	75				263	263	263	0c5d6aed1d23427ac77815eabcecea75_956	c4610aa9a2d5bacd833356b3605d9b21_950	f0f6386fb62ec3a09e34ad652cf53efb_3027	S_aureus_10_02553
dltD		D-alanyl-lipoteichoic acid biosynthesis protein DltD	4	4	1	1	2441				1175	1175	1175	0c5d6aed1d23427ac77815eabcecea75_1700	c4610aa9a2d5bacd833356b3605d9b21_1688	f0f6386fb62ec3a09e34ad652cf53efb_2285	S_aureus_10_00454
fabD		ACP S-malonyltransferase	4	4	1	1	2735				926	926	926	0c5d6aed1d23427ac77815eabcecea75_2309	c4610aa9a2d5bacd833356b3605d9b21_2296	f0f6386fb62ec3a09e34ad652cf53efb_1672	S_aureus_10_00165
WP_001165072.1		hypothetical protein	4	4	1	1	2176				365	365	365	0c5d6aed1d23427ac77815eabcecea75_1149	c4610aa9a2d5bacd833356b3605d9b21_1143	f0f6386fb62ec3a09e34ad652cf53efb_2834	S_aureus_10_00714
WP_001217790.1		anthranilate synthase component I family protein	4	4	1	1	2311				1151	1151	1151	0c5d6aed1d23427ac77815eabcecea75_1429	c4610aa9a2d5bacd833356b3605d9b21_1419	f0f6386fb62ec3a09e34ad652cf53efb_2554	S_aureus_10_00579
corA		magnesium/cobalt transporter CorA	4	4	1	1	1960				947	947	947	0c5d6aed1d23427ac77815eabcecea75_4875	c4610aa9a2d5bacd833356b3605d9b21_4870	f0f6386fb62ec3a09e34ad652cf53efb_4722	S_aureus_10_01936
WP_000655972.1		NAD(P)/FAD-dependent oxidoreductase	4	4	1	1	1022				1034	1034	1034	0c5d6aed1d23427ac77815eabcecea75_4931	c4610aa9a2d5bacd833356b3605d9b21_4928	f0f6386fb62ec3a09e34ad652cf53efb_4666	S_aureus_10_01488
purR		pur operon repressor	4	4	1	1	86				824	824	824	0c5d6aed1d23427ac77815eabcecea75_934	c4610aa9a2d5bacd833356b3605d9b21_928	f0f6386fb62ec3a09e34ad652cf53efb_3049	S_aureus_10_02563
hisC		histidinol-phosphate transaminase	4	4	1	1	2320				1058	1058	1058	0c5d6aed1d23427ac77815eabcecea75_1449	c4610aa9a2d5bacd833356b3605d9b21_1439	f0f6386fb62ec3a09e34ad652cf53efb_2534	S_aureus_10_00570
WP_000040069.1		acetate kinase	4	4	1	1	1297				1202	1202	1202	0c5d6aed1d23427ac77815eabcecea75_3308	c4610aa9a2d5bacd833356b3605d9b21_3301	f0f6386fb62ec3a09e34ad652cf53efb_669	S_aureus_10_01970
traP		signal transduction protein TRAP	4	4	1	1	1545				503	503	503	0c5d6aed1d23427ac77815eabcecea75_3724	c4610aa9a2d5bacd833356b3605d9b21_3723	f0f6386fb62ec3a09e34ad652cf53efb_383	S_aureus_10_02453
WP_000282171.1		queuosine precursor transporter	4	4	1	1	19				704	704	704	0c5d6aed1d23427ac77815eabcecea75_2748	c4610aa9a2d5bacd833356b3605d9b21_2740	f0f6386fb62ec3a09e34ad652cf53efb_1233	S_aureus_10_01527
WP_001080634.1		Abi family protein	4	4	1	1	197				1007	1007	1007	0c5d6aed1d23427ac77815eabcecea75_696	c4610aa9a2d5bacd833356b3605d9b21_690	f0f6386fb62ec3a09e34ad652cf53efb_3287	S_aureus_10_00819
WP_000959284.1		competence protein CoiA	4	4	1	1	2504				986	986	986	0c5d6aed1d23427ac77815eabcecea75_1826	c4610aa9a2d5bacd833356b3605d9b21_1814	f0f6386fb62ec3a09e34ad652cf53efb_2159	S_aureus_10_00391
WP_000375864.1		helix-turn-helix transcriptional regulator	4	4	1	1	1531				464	464	464	0c5d6aed1d23427ac77815eabcecea75_3750	c4610aa9a2d5bacd833356b3605d9b21_3749	f0f6386fb62ec3a09e34ad652cf53efb_357	S_aureus_10_02441
WP_000241588.1		Asp23/Gls24 family envelope stress response protein	4	4	1	1	1122				362	362	362	0c5d6aed1d23427ac77815eabcecea75_2940	c4610aa9a2d5bacd833356b3605d9b21_2934	f0f6386fb62ec3a09e34ad652cf53efb_1037	S_aureus_10_01620
WP_000215216.1		DUF488 domain-containing protein	4	4	1	1	776				356	356	356	0c5d6aed1d23427ac77815eabcecea75_417	c4610aa9a2d5bacd833356b3605d9b21_413	f0f6386fb62ec3a09e34ad652cf53efb_3570	S_aureus_10_00952
WP_001190841.1		response regulator transcription factor	4	4	1	1	1706				695	695	695	0c5d6aed1d23427ac77815eabcecea75_4320	c4610aa9a2d5bacd833356b3605d9b21_4319	f0f6386fb62ec3a09e34ad652cf53efb_5281	S_aureus_10_02260
WP_045178190.1		NAD(P)-binding domain-containing protein	4	4	1	1	446				1106	1106	1106	0c5d6aed1d23427ac77815eabcecea75_5375	c4610aa9a2d5bacd833356b3605d9b21_5372	f0f6386fb62ec3a09e34ad652cf53efb_4224	S_aureus_10_01281
smpB		SsrA-binding protein SmpB	4	4	1	1	2381				464	464	464	0c5d6aed1d23427ac77815eabcecea75_1574	c4610aa9a2d5bacd833356b3605d9b21_1562	f0f6386fb62ec3a09e34ad652cf53efb_2409	S_aureus_10_00512
WP_000617355.1		GNAT family N-acetyltransferase	4	4	1	1	863				491	491	491	0c5d6aed1d23427ac77815eabcecea75_5261	c4610aa9a2d5bacd833356b3605d9b21_5258	f0f6386fb62ec3a09e34ad652cf53efb_4338	S_aureus_10_01335
rho		transcription termination factor Rho	4	4	1	1	1746				1316	1316	1316	0c5d6aed1d23427ac77815eabcecea75_4403	c4610aa9a2d5bacd833356b3605d9b21_4402	f0f6386fb62ec3a09e34ad652cf53efb_5198	S_aureus_10_02220
tkt		transketolase	4	4	1	1	2021				1988	1988	1988	0c5d6aed1d23427ac77815eabcecea75_2557	c4610aa9a2d5bacd833356b3605d9b21_2550	f0f6386fb62ec3a09e34ad652cf53efb_1422	S_aureus_10_00045
WP_001096791.1		lantibiotic protection ABC transporter ATP-binding subunit	4	4	1	1	1413				692	692	692	0c5d6aed1d23427ac77815eabcecea75_3540	c4610aa9a2d5bacd833356b3605d9b21_3535	f0f6386fb62ec3a09e34ad652cf53efb_439	S_aureus_10_02354
WP_000839926.1		nucleotide pyrophosphohydrolase	4	4	1	1	281				317	317	317	0c5d6aed1d23427ac77815eabcecea75_2803	c4610aa9a2d5bacd833356b3605d9b21_2797	f0f6386fb62ec3a09e34ad652cf53efb_1178	S_aureus_10_01555
WP_045178286.1		PTS sugar transporter subunit IIA	4	4	1	1	783				467	467	467	0c5d6aed1d23427ac77815eabcecea75_435	c4610aa9a2d5bacd833356b3605d9b21_431	f0f6386fb62ec3a09e34ad652cf53efb_3552	S_aureus_10_00945
WP_000382901.1		ATP-binding cassette domain-containing protein	4	4	1	1	878				695	695	695	0c5d6aed1d23427ac77815eabcecea75_5231	c4610aa9a2d5bacd833356b3605d9b21_5228	f0f6386fb62ec3a09e34ad652cf53efb_4368	S_aureus_10_01350
WP_000829750.1		hypothetical protein	4	4	1	1	1196				269	269	269	0c5d6aed1d23427ac77815eabcecea75_3089	c4610aa9a2d5bacd833356b3605d9b21_3083	f0f6386fb62ec3a09e34ad652cf53efb_888	S_aureus_10_01692
WP_045177799.1		N-acetylmuramoyl-L-alanine amidase	4	4	1	1	1225				875	875	875	0c5d6aed1d23427ac77815eabcecea75_3154	c4610aa9a2d5bacd833356b3605d9b21_3148	f0f6386fb62ec3a09e34ad652cf53efb_823	S_aureus_10_01723
WP_000547910.1		thiamine diphosphokinase	4	4	1	1	2728				641	641	641	0c5d6aed1d23427ac77815eabcecea75_2295	c4610aa9a2d5bacd833356b3605d9b21_2282	f0f6386fb62ec3a09e34ad652cf53efb_1686	S_aureus_10_00172
trmB		tRNA (guanosine(46)-N7)-methyltransferase TrmB	4	4	1	1	1339				644	644	644	0c5d6aed1d23427ac77815eabcecea75_3392	c4610aa9a2d5bacd833356b3605d9b21_3385	f0f6386fb62ec3a09e34ad652cf53efb_585	S_aureus_10_02006
WP_001065268.1		glutathione peroxidase	4	4	1	1	485				497	497	497	0c5d6aed1d23427ac77815eabcecea75_5457	c4610aa9a2d5bacd833356b3605d9b21_5454	f0f6386fb62ec3a09e34ad652cf53efb_4142	S_aureus_10_01246
WP_045178365.1		hypothetical protein	4	4	1	1	1931				356	356	356	0c5d6aed1d23427ac77815eabcecea75_4814	c4610aa9a2d5bacd833356b3605d9b21_4809	f0f6386fb62ec3a09e34ad652cf53efb_4783	S_aureus_10_01908
WP_000238542.1		MarR family transcriptional regulator	4	4	1	1	1971				455	455	455	0c5d6aed1d23427ac77815eabcecea75_4897	c4610aa9a2d5bacd833356b3605d9b21_4892	f0f6386fb62ec3a09e34ad652cf53efb_4700	S_aureus_10_01946
WP_001220807.1		carboxylesterase	4	4	1	1	127				734	734	734	0c5d6aed1d23427ac77815eabcecea75_837	c4610aa9a2d5bacd833356b3605d9b21_831	f0f6386fb62ec3a09e34ad652cf53efb_3146	S_aureus_10_02515
WP_000032848.1		SarA family transcriptional regulator	4	4	1	1	1909				743	743	743	0c5d6aed1d23427ac77815eabcecea75_4770	c4610aa9a2d5bacd833356b3605d9b21_4765	f0f6386fb62ec3a09e34ad652cf53efb_4827	S_aureus_10_01888
WP_000087107.1		aminopeptidase P family protein	4	4	1	1	1126				1061	1061	1061	0c5d6aed1d23427ac77815eabcecea75_2948	c4610aa9a2d5bacd833356b3605d9b21_2942	f0f6386fb62ec3a09e34ad652cf53efb_1029	S_aureus_10_01624
WP_000664779.1		insulinase family protein	4	4	1	1	2093				1286	1286	1286	0c5d6aed1d23427ac77815eabcecea75_2411	c4610aa9a2d5bacd833356b3605d9b21_2398	f0f6386fb62ec3a09e34ad652cf53efb_1570	S_aureus_10_00116
WP_000384171.1		hypothetical protein	4	4	1	1	1366				224	224	224	0c5d6aed1d23427ac77815eabcecea75_3447	c4610aa9a2d5bacd833356b3605d9b21_3440	f0f6386fb62ec3a09e34ad652cf53efb_530	S_aureus_10_02032
WP_000435109.1		aldo/keto reductase family oxidoreductase	4	4	1	1	2285				908	908	908	0c5d6aed1d23427ac77815eabcecea75_1377	c4610aa9a2d5bacd833356b3605d9b21_1367	f0f6386fb62ec3a09e34ad652cf53efb_2606	S_aureus_10_00605
truA		tRNA pseudouridine(38-40) synthase TruA	4	4	1	1	1831				803	803	803	0c5d6aed1d23427ac77815eabcecea75_4612	c4610aa9a2d5bacd833356b3605d9b21_4607	f0f6386fb62ec3a09e34ad652cf53efb_4985	S_aureus_10_01812
WP_001213020.1		Cof-type HAD-IIB family hydrolase	4	4	1	1	1987				767	767	767	0c5d6aed1d23427ac77815eabcecea75_2625	c4610aa9a2d5bacd833356b3605d9b21_2618	f0f6386fb62ec3a09e34ad652cf53efb_1354	S_aureus_10_00013
pxpB		5-oxoprolinase subunit PxpB	4	4	1	1	1203				734	734	734	0c5d6aed1d23427ac77815eabcecea75_3105	c4610aa9a2d5bacd833356b3605d9b21_3099	f0f6386fb62ec3a09e34ad652cf53efb_872	S_aureus_10_01701
WP_031774786.1		hypothetical protein	4	4	1	1	2274				401	401	401	0c5d6aed1d23427ac77815eabcecea75_1355	c4610aa9a2d5bacd833356b3605d9b21_1345	f0f6386fb62ec3a09e34ad652cf53efb_2628	S_aureus_10_00616
WP_001191952.1		NAD-dependent deacetylase	4	4	1	1	322				944	944	944	0c5d6aed1d23427ac77815eabcecea75_611	c4610aa9a2d5bacd833356b3605d9b21_605	f0f6386fb62ec3a09e34ad652cf53efb_3372	S_aureus_10_00861
sea		staphylococcal enterotoxin type A	4	4	1	1	1061				773	773	773	0c5d6aed1d23427ac77815eabcecea75_4063	c4610aa9a2d5bacd833356b3605d9b21_4062	f0f6386fb62ec3a09e34ad652cf53efb_41	S_aureus_10_02147
WP_000781162.1		kinase-associated lipoprotein B	4	4	1	1	2459				383	383	383	0c5d6aed1d23427ac77815eabcecea75_1736	c4610aa9a2d5bacd833356b3605d9b21_1724	f0f6386fb62ec3a09e34ad652cf53efb_2249	S_aureus_10_00436
WP_001020625.1		XRE family transcriptional regulator	4	4	1	1	2606				539	539	539	0c5d6aed1d23427ac77815eabcecea75_2038	c4610aa9a2d5bacd833356b3605d9b21_2027	f0f6386fb62ec3a09e34ad652cf53efb_1947	S_aureus_10_00294
WP_000785252.1		hypothetical protein	4	4	1	1	2377				458	458	458	0c5d6aed1d23427ac77815eabcecea75_1566	c4610aa9a2d5bacd833356b3605d9b21_1554	f0f6386fb62ec3a09e34ad652cf53efb_2417	S_aureus_10_00516
rplC		50S ribosomal protein L3	4	4	1	1	1862				662	662	662	0c5d6aed1d23427ac77815eabcecea75_4674	c4610aa9a2d5bacd833356b3605d9b21_4669	f0f6386fb62ec3a09e34ad652cf53efb_4923	S_aureus_10_01843
trmD		tRNA (guanosine(37)-N1)-methyltransferase TrmD	4	4	1	1	2134				737	737	737	0c5d6aed1d23427ac77815eabcecea75_2329	c4610aa9a2d5bacd833356b3605d9b21_2316	f0f6386fb62ec3a09e34ad652cf53efb_1652	S_aureus_10_00155
WP_001108126.1		sucrose-specific PTS transporter subunit IIBC	4	4	1	1	1016				1442	1442	1442	0c5d6aed1d23427ac77815eabcecea75_4943	c4610aa9a2d5bacd833356b3605d9b21_4940	f0f6386fb62ec3a09e34ad652cf53efb_4654	S_aureus_10_01483
WP_000669376.1		RluA family pseudouridine synthase	4	4	1	1	1528				821	821	821	0c5d6aed1d23427ac77815eabcecea75_3756	c4610aa9a2d5bacd833356b3605d9b21_3755	f0f6386fb62ec3a09e34ad652cf53efb_351	S_aureus_10_02438
icd		NADP-dependent isocitrate dehydrogenase	4	4	1	1	1281				1268	1268	1268	0c5d6aed1d23427ac77815eabcecea75_3274	c4610aa9a2d5bacd833356b3605d9b21_3267	f0f6386fb62ec3a09e34ad652cf53efb_703	S_aureus_10_01954
gltX		glutamate--tRNA ligase	4	4	1	1	52				1454	1454	1454	0c5d6aed1d23427ac77815eabcecea75_1050	c4610aa9a2d5bacd833356b3605d9b21_1044	f0f6386fb62ec3a09e34ad652cf53efb_2933	S_aureus_10_00763
WP_000365246.1		NUDIX hydrolase	4	4	1	1	237				542	542	542	0c5d6aed1d23427ac77815eabcecea75_2886	c4610aa9a2d5bacd833356b3605d9b21_2880	f0f6386fb62ec3a09e34ad652cf53efb_1091	S_aureus_10_01594
WP_000084829.1		class I SAM-dependent methyltransferase	4	4	1	1	1187				716	716	716	0c5d6aed1d23427ac77815eabcecea75_3071	c4610aa9a2d5bacd833356b3605d9b21_3065	f0f6386fb62ec3a09e34ad652cf53efb_906	S_aureus_10_01683
rlmD		23S rRNA (uracil(1939)-C(5))-methyltransferase RlmD	4	4	1	1	1480				1361	1361	1361	0c5d6aed1d23427ac77815eabcecea75_3947	c4610aa9a2d5bacd833356b3605d9b21_3946	f0f6386fb62ec3a09e34ad652cf53efb_157	S_aureus_10_02099
WP_001164085.1		hypothetical protein	4	4	1	1	2250				497	497	497	0c5d6aed1d23427ac77815eabcecea75_1305	c4610aa9a2d5bacd833356b3605d9b21_1295	f0f6386fb62ec3a09e34ad652cf53efb_2678	S_aureus_10_00640
truB		tRNA pseudouridine(55) synthase TruB	4	4	1	1	2101				917	917	917	0c5d6aed1d23427ac77815eabcecea75_2395	c4610aa9a2d5bacd833356b3605d9b21_2382	f0f6386fb62ec3a09e34ad652cf53efb_1586	S_aureus_10_00124
WP_000606726.1		hypothetical protein	4	4	1	1	1928				329	329	329	0c5d6aed1d23427ac77815eabcecea75_4808	c4610aa9a2d5bacd833356b3605d9b21_4803	f0f6386fb62ec3a09e34ad652cf53efb_4789	S_aureus_10_01905
WP_000429674.1		amino acid permease	4	4	1	1	1930				1379	1379	1379	0c5d6aed1d23427ac77815eabcecea75_4812	c4610aa9a2d5bacd833356b3605d9b21_4807	f0f6386fb62ec3a09e34ad652cf53efb_4785	S_aureus_10_01907
WP_000395153.1		monovalent cation:proton antiporter family protein	4	4	1	1	2514				1844	1844	1844	0c5d6aed1d23427ac77815eabcecea75_1846	c4610aa9a2d5bacd833356b3605d9b21_1834	f0f6386fb62ec3a09e34ad652cf53efb_2139	S_aureus_10_00381
WP_001566557.1		thermonuclease family protein	4	4	1	1	2392				686	686	686	0c5d6aed1d23427ac77815eabcecea75_1601	c4610aa9a2d5bacd833356b3605d9b21_1587	f0f6386fb62ec3a09e34ad652cf53efb_2384	S_aureus_10_00502
WP_000455861.1		CHAP domain-containing protein	4	4	1	1	407				431	431	431	0c5d6aed1d23427ac77815eabcecea75_5295	c4610aa9a2d5bacd833356b3605d9b21_5292	f0f6386fb62ec3a09e34ad652cf53efb_4304	S_aureus_10_01319
rsmA		16S rRNA (adenine(1518)-N(6)/adenine(1519)-N(6))-dimethyltransferase RsmA	4	4	1	1	89				893	893	893	0c5d6aed1d23427ac77815eabcecea75_928	c4610aa9a2d5bacd833356b3605d9b21_922	f0f6386fb62ec3a09e34ad652cf53efb_3055	S_aureus_10_02566
WP_000776014.1		DNA-binding protein	4	4	1	1	2291				422	422	422	0c5d6aed1d23427ac77815eabcecea75_1389	c4610aa9a2d5bacd833356b3605d9b21_1379	f0f6386fb62ec3a09e34ad652cf53efb_2594	S_aureus_10_00599
WP_000344336.1		DNA polymerase III subunit delta'	4	4	1	1	98				926	926	926	0c5d6aed1d23427ac77815eabcecea75_910	c4610aa9a2d5bacd833356b3605d9b21_904	f0f6386fb62ec3a09e34ad652cf53efb_3073	S_aureus_10_02575
WP_000686460.1		RES family NAD+ phosphorylase	4	4	1	1	743				1112	1112	1112	0c5d6aed1d23427ac77815eabcecea75_349	c4610aa9a2d5bacd833356b3605d9b21_345	f0f6386fb62ec3a09e34ad652cf53efb_3644	S_aureus_10_00985
WP_000649986.1		tandem-type lipoprotein	4	4	1	1	644				767	767	767	0c5d6aed1d23427ac77815eabcecea75_147	c4610aa9a2d5bacd833356b3605d9b21_145	f0f6386fb62ec3a09e34ad652cf53efb_3846	S_aureus_10_01083
WP_000794020.1		NAD(P)/FAD-dependent oxidoreductase	4	4	1	1	2444				1064	1064	1064	0c5d6aed1d23427ac77815eabcecea75_1706	c4610aa9a2d5bacd833356b3605d9b21_1694	f0f6386fb62ec3a09e34ad652cf53efb_2279	S_aureus_10_00451
panB		3-methyl-2-oxobutanoate hydroxymethyltransferase	4	4	1	1	459				818	818	818	0c5d6aed1d23427ac77815eabcecea75_5401	c4610aa9a2d5bacd833356b3605d9b21_5398	f0f6386fb62ec3a09e34ad652cf53efb_4198	S_aureus_10_01268
arsB		arsenite efflux transporter membrane subunit ArsB	4	4	1	1	1363				1292	1292	1292	0c5d6aed1d23427ac77815eabcecea75_3441	c4610aa9a2d5bacd833356b3605d9b21_3434	f0f6386fb62ec3a09e34ad652cf53efb_536	S_aureus_10_02029
WP_000312761.1		NFACT family protein	4	4	1	1	2713				1697	1697	1697	0c5d6aed1d23427ac77815eabcecea75_2265	c4610aa9a2d5bacd833356b3605d9b21_2252	f0f6386fb62ec3a09e34ad652cf53efb_1716	S_aureus_10_00187
infB		translation initiation factor IF-2	4	4	1	1	2103				2117	2117	2117	0c5d6aed1d23427ac77815eabcecea75_2391	c4610aa9a2d5bacd833356b3605d9b21_2378	f0f6386fb62ec3a09e34ad652cf53efb_1590	S_aureus_10_00126
WP_000058389.1		NAD-dependent malic enzyme	4	4	1	1	1288				1229	1229	1229	0c5d6aed1d23427ac77815eabcecea75_3288	c4610aa9a2d5bacd833356b3605d9b21_3281	f0f6386fb62ec3a09e34ad652cf53efb_689	S_aureus_10_01961
mnmE		tRNA uridine-5-carboxymethylaminomethyl(34) synthesis GTPase MnmE	4	4	1	1	576				1379	1379	1379	0c5d6aed1d23427ac77815eabcecea75_5639	c4610aa9a2d5bacd833356b3605d9b21_5638	f0f6386fb62ec3a09e34ad652cf53efb_3960	S_aureus_10_01156
WP_000572947.1		polymorphic toxin type 50 domain-containing protein	4	4	1	1	2049				353	353	353	0c5d6aed1d23427ac77815eabcecea75_2497	c4610aa9a2d5bacd833356b3605d9b21_2490	f0f6386fb62ec3a09e34ad652cf53efb_1482	S_aureus_10_00073
WP_001283612.1		redox-sensing transcriptional repressor Rex	4	4	1	1	1669				635	635	635	0c5d6aed1d23427ac77815eabcecea75_4231	c4610aa9a2d5bacd833356b3605d9b21_4230	f0f6386fb62ec3a09e34ad652cf53efb_5370	S_aureus_10_02328
WP_000215643.1		HoxN/HupN/NixA family nickel/cobalt transporter	4	4	1	1	563				1016	1016	1016	0c5d6aed1d23427ac77815eabcecea75_5613	c4610aa9a2d5bacd833356b3605d9b21_5612	f0f6386fb62ec3a09e34ad652cf53efb_3986	S_aureus_10_01169
menB		1,4-dihydroxy-2-naphthoyl-CoA synthase	4	4	1	1	2552				821	821	821	0c5d6aed1d23427ac77815eabcecea75_1929	c4610aa9a2d5bacd833356b3605d9b21_1916	f0f6386fb62ec3a09e34ad652cf53efb_2056	S_aureus_10_00346
WP_000603963.1		ABC transporter permease	4	4	1	1	2043				731	731	731	0c5d6aed1d23427ac77815eabcecea75_2509	c4610aa9a2d5bacd833356b3605d9b21_2502	f0f6386fb62ec3a09e34ad652cf53efb_1470	S_aureus_10_00067
WP_000273984.1		DUF86 domain-containing protein	4	4	1	1	2433				434	434	434	0c5d6aed1d23427ac77815eabcecea75_1684	c4610aa9a2d5bacd833356b3605d9b21_1672	f0f6386fb62ec3a09e34ad652cf53efb_2301	S_aureus_10_00461
WP_000154685.1		DUF1405 domain-containing protein	4	4	1	1	279				587	587	587	0c5d6aed1d23427ac77815eabcecea75_2807	c4610aa9a2d5bacd833356b3605d9b21_2801	f0f6386fb62ec3a09e34ad652cf53efb_1174	S_aureus_10_01557
pheT		phenylalanine--tRNA ligase subunit beta	4	4	1	1	2647				2402	2402	2402	0c5d6aed1d23427ac77815eabcecea75_2120	c4610aa9a2d5bacd833356b3605d9b21_2109	f0f6386fb62ec3a09e34ad652cf53efb_1865	S_aureus_10_00255
WP_000995287.1		BrxA/BrxB family bacilliredoxin	4	4	1	1	15				437	437	437	0c5d6aed1d23427ac77815eabcecea75_2740	c4610aa9a2d5bacd833356b3605d9b21_2732	f0f6386fb62ec3a09e34ad652cf53efb_1241	S_aureus_10_01524
yycH		hypothetical protein	4	4	1	1	598				1334	1334	1334	0c5d6aed1d23427ac77815eabcecea75_49	c4610aa9a2d5bacd833356b3605d9b21_49	f0f6386fb62ec3a09e34ad652cf53efb_3908	S_aureus_10_01132
WP_000323446.1		esterase family protein	4	4	1	1	495				761	761	761	0c5d6aed1d23427ac77815eabcecea75_5479	c4610aa9a2d5bacd833356b3605d9b21_5476	f0f6386fb62ec3a09e34ad652cf53efb_4120	S_aureus_10_01236
lacB		galactose-6-phosphate isomerase subunit LacB	4	4	1	1	1815				515	515	515	0c5d6aed1d23427ac77815eabcecea75_4574	c4610aa9a2d5bacd833356b3605d9b21_4573	f0f6386fb62ec3a09e34ad652cf53efb_5023	S_aureus_10_01798
WP_000477505.1		GNAT family N-acetyltransferase	4	4	1	1	2203				476	476	476	0c5d6aed1d23427ac77815eabcecea75_1205	c4610aa9a2d5bacd833356b3605d9b21_1199	f0f6386fb62ec3a09e34ad652cf53efb_2778	S_aureus_10_00688
WP_001817587.1		tandem-type lipoprotein	4	4	1	1	643				770	803	778	0c5d6aed1d23427ac77815eabcecea75_145	c4610aa9a2d5bacd833356b3605d9b21_143	f0f6386fb62ec3a09e34ad652cf53efb_3848	S_aureus_10_01084
amaP		alkaline shock response membrane anchor protein AmaP	4	4	1	1	1805				536	536	536	0c5d6aed1d23427ac77815eabcecea75_4554	c4610aa9a2d5bacd833356b3605d9b21_4553	f0f6386fb62ec3a09e34ad652cf53efb_5043	S_aureus_10_01788
WP_045177258.1		DUF3969 family protein	4	4	1	1	1388				341	341	341	0c5d6aed1d23427ac77815eabcecea75_3492	c4610aa9a2d5bacd833356b3605d9b21_3485	f0f6386fb62ec3a09e34ad652cf53efb_485	S_aureus_10_02054
WP_001293306.1		GntR family transcriptional regulator	4	4	1	1	2095				713	713	713	0c5d6aed1d23427ac77815eabcecea75_2407	c4610aa9a2d5bacd833356b3605d9b21_2394	f0f6386fb62ec3a09e34ad652cf53efb_1574	S_aureus_10_00118
WP_000717381.1		CHAP domain-containing protein	4	4	1	1	1911				803	803	803	0c5d6aed1d23427ac77815eabcecea75_4774	c4610aa9a2d5bacd833356b3605d9b21_4769	f0f6386fb62ec3a09e34ad652cf53efb_4823	S_aureus_10_01890
gyrB		DNA topoisomerase (ATP-hydrolyzing) subunit B	4	4	1	1	583				1934	1934	1934	0c5d6aed1d23427ac77815eabcecea75_11	c4610aa9a2d5bacd833356b3605d9b21_11	f0f6386fb62ec3a09e34ad652cf53efb_3946	S_aureus_10_01149
WP_045178282.1		galactitol-1-phosphate 5-dehydrogenase	4	4	1	1	788				1043	1043	1043	0c5d6aed1d23427ac77815eabcecea75_445	c4610aa9a2d5bacd833356b3605d9b21_441	f0f6386fb62ec3a09e34ad652cf53efb_3542	S_aureus_10_00940
bioA		adenosylmethionine--8-amino-7-oxononanoate transaminase	4	4	1	1	967				1358	1358	1358	0c5d6aed1d23427ac77815eabcecea75_5045	c4610aa9a2d5bacd833356b3605d9b21_5040	f0f6386fb62ec3a09e34ad652cf53efb_4552	S_aureus_10_01435
WP_045177985.1		metal ABC transporter permease	4	4	1	1	2229				836	836	836	0c5d6aed1d23427ac77815eabcecea75_1263	c4610aa9a2d5bacd833356b3605d9b21_1253	f0f6386fb62ec3a09e34ad652cf53efb_2720	S_aureus_10_00660
WP_000020853.1		YlxQ family RNA-binding protein	4	4	1	1	2104				317	317	317	0c5d6aed1d23427ac77815eabcecea75_2389	c4610aa9a2d5bacd833356b3605d9b21_2376	f0f6386fb62ec3a09e34ad652cf53efb_1592	S_aureus_10_00127
rapZ		RNase adapter RapZ	4	4	1	1	2365				911	911	911	0c5d6aed1d23427ac77815eabcecea75_1542	c4610aa9a2d5bacd833356b3605d9b21_1530	f0f6386fb62ec3a09e34ad652cf53efb_2441	S_aureus_10_00529
WP_000838204.1		PTS transporter subunit EIIC	4	4	1	1	780				1529	1529	1529	0c5d6aed1d23427ac77815eabcecea75_427	c4610aa9a2d5bacd833356b3605d9b21_423	f0f6386fb62ec3a09e34ad652cf53efb_3560	S_aureus_10_00948
WP_001167828.1		N-acetyltransferase	4	4	1	1	106				524	524	524	0c5d6aed1d23427ac77815eabcecea75_885	c4610aa9a2d5bacd833356b3605d9b21_879	f0f6386fb62ec3a09e34ad652cf53efb_3098	S_aureus_10_02495
WP_000863384.1		TIGR01741 family protein	4	4	1	1	351				500	500	500	0c5d6aed1d23427ac77815eabcecea75_553	c4610aa9a2d5bacd833356b3605d9b21_547	f0f6386fb62ec3a09e34ad652cf53efb_3432	S_aureus_10_00888
WP_000667382.1		MurR/RpiR family transcriptional regulator	4	4	1	1	331				800	800	800	0c5d6aed1d23427ac77815eabcecea75_591	c4610aa9a2d5bacd833356b3605d9b21_585	f0f6386fb62ec3a09e34ad652cf53efb_3392	S_aureus_10_00870
WP_000954654.1		metal-dependent transcriptional regulator	4	4	1	1	2231				644	644	644	0c5d6aed1d23427ac77815eabcecea75_1267	c4610aa9a2d5bacd833356b3605d9b21_1257	f0f6386fb62ec3a09e34ad652cf53efb_2716	S_aureus_10_00658
srrA		two-component system response regulator SrrA	4	4	1	1	244				725	725	725	0c5d6aed1d23427ac77815eabcecea75_2872	c4610aa9a2d5bacd833356b3605d9b21_2866	f0f6386fb62ec3a09e34ad652cf53efb_1105	S_aureus_10_01587
WP_000195907.1		cyclase family protein	4	4	1	1	210				752	752	752	0c5d6aed1d23427ac77815eabcecea75_669	c4610aa9a2d5bacd833356b3605d9b21_663	f0f6386fb62ec3a09e34ad652cf53efb_3314	S_aureus_10_00832
WP_000157345.1		DUF951 domain-containing protein	4	4	1	1	203				203	203	203	0c5d6aed1d23427ac77815eabcecea75_684	c4610aa9a2d5bacd833356b3605d9b21_678	f0f6386fb62ec3a09e34ad652cf53efb_3299	S_aureus_10_00825
rpsJ		30S ribosomal protein S10	4	4	1	1	1863				308	308	308	0c5d6aed1d23427ac77815eabcecea75_4676	c4610aa9a2d5bacd833356b3605d9b21_4671	f0f6386fb62ec3a09e34ad652cf53efb_4921	S_aureus_10_01844
WP_045178254.1		hypothetical protein	4	4	1	1	373				1523	1523	1523	0c5d6aed1d23427ac77815eabcecea75_509	c4610aa9a2d5bacd833356b3605d9b21_505	f0f6386fb62ec3a09e34ad652cf53efb_3478	S_aureus_10_00910
rpsN		30S ribosomal protein S14	4	4	1	1	2027				269	269	269	0c5d6aed1d23427ac77815eabcecea75_2543	c4610aa9a2d5bacd833356b3605d9b21_2536	f0f6386fb62ec3a09e34ad652cf53efb_1436	S_aureus_10_00051
ezrA		septation ring formation regulator EzrA	4	4	1	1	1304				1694	1694	1694	0c5d6aed1d23427ac77815eabcecea75_3322	c4610aa9a2d5bacd833356b3605d9b21_3315	f0f6386fb62ec3a09e34ad652cf53efb_655	S_aureus_10_01976
WP_001213908.1		metal ABC transporter ATP-binding protein	4	4	1	1	1153				785	785	785	0c5d6aed1d23427ac77815eabcecea75_3003	c4610aa9a2d5bacd833356b3605d9b21_2997	f0f6386fb62ec3a09e34ad652cf53efb_974	S_aureus_10_01649
sdpB		CPBP family intramembrane metalloprotease SdpB	4	4	1	1	1927				737	737	737	0c5d6aed1d23427ac77815eabcecea75_4806	c4610aa9a2d5bacd833356b3605d9b21_4801	f0f6386fb62ec3a09e34ad652cf53efb_4791	S_aureus_10_01904
groES		co-chaperone GroES	4	4	1	1	1653				284	284	284	0c5d6aed1d23427ac77815eabcecea75_4197	c4610aa9a2d5bacd833356b3605d9b21_4196	f0f6386fb62ec3a09e34ad652cf53efb_5404	S_aureus_10_02312
folD		bifunctional methylenetetrahydrofolate dehydrogenase/methenyltetrahydrofolate cyclohydrolase FolD	4	4	1	1	2570				860	860	860	0c5d6aed1d23427ac77815eabcecea75_1967	c4610aa9a2d5bacd833356b3605d9b21_1954	f0f6386fb62ec3a09e34ad652cf53efb_2018	S_aureus_10_00329
ptsP		phosphoenolpyruvate--protein phosphotransferase	4	4	1	1	2591				1718	1718	1718	0c5d6aed1d23427ac77815eabcecea75_2008	c4610aa9a2d5bacd833356b3605d9b21_1997	f0f6386fb62ec3a09e34ad652cf53efb_1977	S_aureus_10_00308
WP_000991018.1		L-cystine transporter	4	4	1	1	180				1388	1388	1388	0c5d6aed1d23427ac77815eabcecea75_726	c4610aa9a2d5bacd833356b3605d9b21_722	f0f6386fb62ec3a09e34ad652cf53efb_3257	S_aureus_10_00805
rsfS		ribosome silencing factor	4	4	1	1	1188				353	353	353	0c5d6aed1d23427ac77815eabcecea75_3073	c4610aa9a2d5bacd833356b3605d9b21_3067	f0f6386fb62ec3a09e34ad652cf53efb_904	S_aureus_10_01684
WP_000182026.1		hypothetical protein	4	4	1	1	289				341	341	341	0c5d6aed1d23427ac77815eabcecea75_2787	c4610aa9a2d5bacd833356b3605d9b21_2781	f0f6386fb62ec3a09e34ad652cf53efb_1194	S_aureus_10_01547
gcvPB		aminomethyl-transferring glycine dehydrogenase subunit GcvPB	4	4	1	1	1131				1472	1472	1472	0c5d6aed1d23427ac77815eabcecea75_2958	c4610aa9a2d5bacd833356b3605d9b21_2952	f0f6386fb62ec3a09e34ad652cf53efb_1019	S_aureus_10_01629
selX		staphylococcal enterotoxin-like toxin X	4	4	1	1	194				611	611	611	0c5d6aed1d23427ac77815eabcecea75_700	c4610aa9a2d5bacd833356b3605d9b21_696	f0f6386fb62ec3a09e34ad652cf53efb_3283	S_aureus_10_00818
WP_001034726.1		DUF1433 domain-containing protein	4	4	1	1	915				422	422	422	0c5d6aed1d23427ac77815eabcecea75_5151	c4610aa9a2d5bacd833356b3605d9b21_5146	f0f6386fb62ec3a09e34ad652cf53efb_4446	S_aureus_10_01386
glmU		bifunctional UDP-N-acetylglucosamine diphosphorylase/glucosamine-1-phosphate N-acetyltransferase GlmU	4	4	1	1	82				1352	1352	1352	0c5d6aed1d23427ac77815eabcecea75_942	c4610aa9a2d5bacd833356b3605d9b21_936	f0f6386fb62ec3a09e34ad652cf53efb_3041	S_aureus_10_02560
nfsA		oxygen-insensitive NADPH nitroreductase	4	4	1	1	181				755	755	755	0c5d6aed1d23427ac77815eabcecea75_724	c4610aa9a2d5bacd833356b3605d9b21_720	f0f6386fb62ec3a09e34ad652cf53efb_3259	S_aureus_10_00806
WP_000545115.1		hypothetical protein	4	4	1	1	2275				299	299	299	0c5d6aed1d23427ac77815eabcecea75_1357	c4610aa9a2d5bacd833356b3605d9b21_1347	f0f6386fb62ec3a09e34ad652cf53efb_2626	S_aureus_10_00615
WP_000159960.1		CTP synthase	4	4	1	1	1752				1610	1610	1610	0c5d6aed1d23427ac77815eabcecea75_4415	c4610aa9a2d5bacd833356b3605d9b21_4414	f0f6386fb62ec3a09e34ad652cf53efb_5186	S_aureus_10_02214
sfaA		staphyloferrin A export MFS transporter	4	4	1	1	1801				1193	1193	1193	0c5d6aed1d23427ac77815eabcecea75_4546	c4610aa9a2d5bacd833356b3605d9b21_4545	f0f6386fb62ec3a09e34ad652cf53efb_5051	S_aureus_10_01784
WP_001016008.1		GNAT family N-acetyltransferase	4	4	1	1	1323				632	632	632	0c5d6aed1d23427ac77815eabcecea75_3360	c4610aa9a2d5bacd833356b3605d9b21_3353	f0f6386fb62ec3a09e34ad652cf53efb_617	S_aureus_10_01992
rplM		50S ribosomal protein L13	4	4	1	1	1830				437	437	437	0c5d6aed1d23427ac77815eabcecea75_4610	c4610aa9a2d5bacd833356b3605d9b21_4605	f0f6386fb62ec3a09e34ad652cf53efb_4987	S_aureus_10_01811
WP_000481425.1		gluconate:H+ symporter	4	4	1	1	889				1358	1358	1358	0c5d6aed1d23427ac77815eabcecea75_5209	c4610aa9a2d5bacd833356b3605d9b21_5206	f0f6386fb62ec3a09e34ad652cf53efb_4390	S_aureus_10_01360
WP_000435374.1		RNA methyltransferase	4	4	1	1	2645				740	740	740	0c5d6aed1d23427ac77815eabcecea75_2116	c4610aa9a2d5bacd833356b3605d9b21_2105	f0f6386fb62ec3a09e34ad652cf53efb_1869	S_aureus_10_00257
WP_000590844.1		ABC transporter ATP-binding protein	4	4	1	1	716				740	740	740	0c5d6aed1d23427ac77815eabcecea75_295	c4610aa9a2d5bacd833356b3605d9b21_291	f0f6386fb62ec3a09e34ad652cf53efb_3698	S_aureus_10_01011
WP_000569884.1		GNAT family N-acetyltransferase	4	4	1	1	2403				494	494	494	0c5d6aed1d23427ac77815eabcecea75_1623	c4610aa9a2d5bacd833356b3605d9b21_1609	f0f6386fb62ec3a09e34ad652cf53efb_2362	S_aureus_10_00491
WP_001030738.1		N-acetylneuraminate lyase	4	4	1	1	333				881	881	881	0c5d6aed1d23427ac77815eabcecea75_587	c4610aa9a2d5bacd833356b3605d9b21_581	f0f6386fb62ec3a09e34ad652cf53efb_3396	S_aureus_10_00872
nreB		nitrate respiration regulation sensor histidine kinase NreB	4	4	1	1	1003				1034	1034	1034	0c5d6aed1d23427ac77815eabcecea75_4969	c4610aa9a2d5bacd833356b3605d9b21_4966	f0f6386fb62ec3a09e34ad652cf53efb_4628	S_aureus_10_01470
queC		7-cyano-7-deazaguanine synthase QueC	4	4	1	1	2309				668	668	668	0c5d6aed1d23427ac77815eabcecea75_1425	c4610aa9a2d5bacd833356b3605d9b21_1415	f0f6386fb62ec3a09e34ad652cf53efb_2558	S_aureus_10_00581
WP_031783376.1		transcriptional regulator	4	4	1	1	1086				125	125	125	0c5d6aed1d23427ac77815eabcecea75_4113	c4610aa9a2d5bacd833356b3605d9b21_4112	f0f6386fb62ec3a09e34ad652cf53efb_5488	S_aureus_10_02171
rsmG		16S rRNA (guanine(527)-N(7))-methyltransferase RsmG	4	4	1	1	574				719	719	719	0c5d6aed1d23427ac77815eabcecea75_5635	c4610aa9a2d5bacd833356b3605d9b21_5634	f0f6386fb62ec3a09e34ad652cf53efb_3964	S_aureus_10_01158
WP_000684051.1		2-dehydropantoate 2-reductase	4	4	1	1	950				935	935	935	0c5d6aed1d23427ac77815eabcecea75_5081	c4610aa9a2d5bacd833356b3605d9b21_5076	f0f6386fb62ec3a09e34ad652cf53efb_4516	S_aureus_10_01419
blaR1		beta-lactam sensor/signal transducer BlaR1	4	4	1	2	16				1757	1757	1757	0c5d6aed1d23427ac77815eabcecea75_5666	c4610aa9a2d5bacd833356b3605d9b21_5683	f0f6386fb62ec3a09e34ad652cf53efb_5519	S_aureus_10_02590
WP_001213992.1		YbaB/EbfC family nucleoid-associated protein	4	4	1	1	104				317	317	317	0c5d6aed1d23427ac77815eabcecea75_889	c4610aa9a2d5bacd833356b3605d9b21_883	f0f6386fb62ec3a09e34ad652cf53efb_3094	S_aureus_10_02493
WP_000234727.1		thioesterase family protein	4	4	1	1	1961				491	491	491	0c5d6aed1d23427ac77815eabcecea75_4877	c4610aa9a2d5bacd833356b3605d9b21_4872	f0f6386fb62ec3a09e34ad652cf53efb_4720	S_aureus_10_01937
mdeA		multidrug efflux MFS transporter MdeA	4	4	1	1	979				1439	1439	1439	0c5d6aed1d23427ac77815eabcecea75_5019	c4610aa9a2d5bacd833356b3605d9b21_5014	f0f6386fb62ec3a09e34ad652cf53efb_4578	S_aureus_10_01447
WP_000633782.1		flavodoxin family protein	4	4	1	1	2202				536	536	536	0c5d6aed1d23427ac77815eabcecea75_1203	c4610aa9a2d5bacd833356b3605d9b21_1197	f0f6386fb62ec3a09e34ad652cf53efb_2780	S_aureus_10_00689
WP_000863440.1		2-oxo acid dehydrogenase subunit E2	4	4	1	1	2603				1292	1292	1292	0c5d6aed1d23427ac77815eabcecea75_2032	c4610aa9a2d5bacd833356b3605d9b21_2021	f0f6386fb62ec3a09e34ad652cf53efb_1953	S_aureus_10_00297
rpsF		30S ribosomal protein S6	4	4	1	1	200				296	296	296	0c5d6aed1d23427ac77815eabcecea75_690	c4610aa9a2d5bacd833356b3605d9b21_684	f0f6386fb62ec3a09e34ad652cf53efb_3293	S_aureus_10_00822
WP_001186912.1		ECF transporter S component	4	4	1	1	254				545	545	545	0c5d6aed1d23427ac77815eabcecea75_2857	c4610aa9a2d5bacd833356b3605d9b21_2851	f0f6386fb62ec3a09e34ad652cf53efb_1124	S_aureus_10_01579
mnhB1		Na+/H+ antiporter Mnh1 subunit B	4	4	1	1	2457				428	428	428	0c5d6aed1d23427ac77815eabcecea75_1732	c4610aa9a2d5bacd833356b3605d9b21_1720	f0f6386fb62ec3a09e34ad652cf53efb_2253	S_aureus_10_00438
WP_000011542.1		DUF2179 domain-containing protein	4	4	1	1	1465				602	602	602	0c5d6aed1d23427ac77815eabcecea75_3979	c4610aa9a2d5bacd833356b3605d9b21_3978	f0f6386fb62ec3a09e34ad652cf53efb_125	S_aureus_10_02114
WP_045177091.1		tandem-type lipoprotein	4	4	1	1	143				776	776	776	0c5d6aed1d23427ac77815eabcecea75_805	c4610aa9a2d5bacd833356b3605d9b21_799	f0f6386fb62ec3a09e34ad652cf53efb_3178	S_aureus_10_02527
WP_000623478.1		CrcB family protein	4	4	1	1	1374				353	353	353	0c5d6aed1d23427ac77815eabcecea75_3463	c4610aa9a2d5bacd833356b3605d9b21_3456	f0f6386fb62ec3a09e34ad652cf53efb_514	S_aureus_10_02040
WP_000535834.1		ABC transporter ATP-binding protein	4	4	1	1	1508				1517	1517	1517	0c5d6aed1d23427ac77815eabcecea75_3891	c4610aa9a2d5bacd833356b3605d9b21_3890	f0f6386fb62ec3a09e34ad652cf53efb_213	S_aureus_10_02073
rbsD		D-ribose pyranase	4	4	1	1	808				404	404	404	0c5d6aed1d23427ac77815eabcecea75_485	c4610aa9a2d5bacd833356b3605d9b21_481	f0f6386fb62ec3a09e34ad652cf53efb_3502	S_aureus_10_00921
WP_045177652.1		MerR family transcriptional regulator	4	4	1	1	1005				740	740	740	0c5d6aed1d23427ac77815eabcecea75_4965	c4610aa9a2d5bacd833356b3605d9b21_4962	f0f6386fb62ec3a09e34ad652cf53efb_4632	S_aureus_10_01472
queA		tRNA preQ1(34) S-adenosylmethionine ribosyltransferase-isomerase QueA	4	4	1	1	1233				1025	1025	1025	0c5d6aed1d23427ac77815eabcecea75_3170	c4610aa9a2d5bacd833356b3605d9b21_3164	f0f6386fb62ec3a09e34ad652cf53efb_807	S_aureus_10_01731
WP_000916195.1		aromatic acid exporter family protein	4	4	1	1	1110				980	980	980	0c5d6aed1d23427ac77815eabcecea75_2916	c4610aa9a2d5bacd833356b3605d9b21_2910	f0f6386fb62ec3a09e34ad652cf53efb_1061	S_aureus_10_01608
tilS		tRNA lysidine(34) synthetase TilS	4	4	1	1	72				1295	1295	1295	0c5d6aed1d23427ac77815eabcecea75_962	c4610aa9a2d5bacd833356b3605d9b21_956	f0f6386fb62ec3a09e34ad652cf53efb_3021	S_aureus_10_02550
WP_000622704.1		low specificity L-threonine aldolase	4	4	1	1	2047				1025	1025	1025	0c5d6aed1d23427ac77815eabcecea75_2501	c4610aa9a2d5bacd833356b3605d9b21_2494	f0f6386fb62ec3a09e34ad652cf53efb_1478	S_aureus_10_00071
WP_000593103.1		ABC transporter ATP-binding protein	4	4	1	2	23				626	626	626	0c5d6aed1d23427ac77815eabcecea75_5678	c4610aa9a2d5bacd833356b3605d9b21_5671	f0f6386fb62ec3a09e34ad652cf53efb_5531	S_aureus_10_02584
WP_000977032.1		LytTR family DNA-binding domain-containing protein	4	4	1	1	1031				443	443	443	0c5d6aed1d23427ac77815eabcecea75_4913	c4610aa9a2d5bacd833356b3605d9b21_4910	f0f6386fb62ec3a09e34ad652cf53efb_4684	S_aureus_10_01497
WP_000899890.1		threonine/serine exporter family protein	4	4	1	1	2341				494	494	494	0c5d6aed1d23427ac77815eabcecea75_1495	c4610aa9a2d5bacd833356b3605d9b21_1483	f0f6386fb62ec3a09e34ad652cf53efb_2488	S_aureus_10_00550
WP_023914547.1		response regulator transcription factor	4	4	1	1	761				758	758	758	0c5d6aed1d23427ac77815eabcecea75_385	c4610aa9a2d5bacd833356b3605d9b21_381	f0f6386fb62ec3a09e34ad652cf53efb_3608	S_aureus_10_00967
cobA		uroporphyrinogen-III C-methyltransferase	4	4	1	1	997				977	977	977	0c5d6aed1d23427ac77815eabcecea75_4981	c4610aa9a2d5bacd833356b3605d9b21_4978	f0f6386fb62ec3a09e34ad652cf53efb_4616	S_aureus_10_01464
WP_000178307.1		phytoene/squalene synthase family protein	4	4	1	1	426				863	863	863	0c5d6aed1d23427ac77815eabcecea75_5333	c4610aa9a2d5bacd833356b3605d9b21_5330	f0f6386fb62ec3a09e34ad652cf53efb_4266	S_aureus_10_01301
WP_000581077.1		sulfurtransferase TusA family protein	4	4	1	1	1667				224	224	224	0c5d6aed1d23427ac77815eabcecea75_4227	c4610aa9a2d5bacd833356b3605d9b21_4226	f0f6386fb62ec3a09e34ad652cf53efb_5374	S_aureus_10_02326
WP_000942300.1		ATP-binding cassette domain-containing protein	4	4	1	1	833				1601	1601	1601	0c5d6aed1d23427ac77815eabcecea75_2659	c4610aa9a2d5bacd833356b3605d9b21_2652	f0f6386fb62ec3a09e34ad652cf53efb_1322	S_aureus_10_02617
WP_000454784.1		HAD family hydrolase	4	4	1	1	2155				683	683	683	0c5d6aed1d23427ac77815eabcecea75_1107	c4610aa9a2d5bacd833356b3605d9b21_1101	f0f6386fb62ec3a09e34ad652cf53efb_2876	S_aureus_10_00735
WP_000467991.1		ABC transporter permease	4	4	1	1	121				659	659	659	0c5d6aed1d23427ac77815eabcecea75_849	c4610aa9a2d5bacd833356b3605d9b21_843	f0f6386fb62ec3a09e34ad652cf53efb_3134	S_aureus_10_02510
group_2279	argF	ornithine carbamoyltransferase	4	4	1	1	2674				1001	1001	1001	0c5d6aed1d23427ac77815eabcecea75_2180	c4610aa9a2d5bacd833356b3605d9b21_2169	f0f6386fb62ec3a09e34ad652cf53efb_1805	S_aureus_10_00229
WP_001109287.1		rhodanese-related sulfurtransferase	4	4	1	1	556				956	956	956	0c5d6aed1d23427ac77815eabcecea75_5599	c4610aa9a2d5bacd833356b3605d9b21_5598	f0f6386fb62ec3a09e34ad652cf53efb_4000	S_aureus_10_01176
WP_000434933.1		staphostatin A	4	4	1	1	1467				326	326	326	0c5d6aed1d23427ac77815eabcecea75_3975	c4610aa9a2d5bacd833356b3605d9b21_3974	f0f6386fb62ec3a09e34ad652cf53efb_129	S_aureus_10_02112
lukH		bi-component leukocidin LukGH subunit H	4	4	1	1	1647				1052	1052	1052	0c5d6aed1d23427ac77815eabcecea75_4185	c4610aa9a2d5bacd833356b3605d9b21_4184	f0f6386fb62ec3a09e34ad652cf53efb_5416	S_aureus_10_02306
WP_000838479.1		DNA topoisomerase III	4	4	1	1	1866				2135	2135	2135	0c5d6aed1d23427ac77815eabcecea75_4682	c4610aa9a2d5bacd833356b3605d9b21_4677	f0f6386fb62ec3a09e34ad652cf53efb_4915	S_aureus_10_01847
WP_000079317.1		succinate dehydrogenase cytochrome b558 subunit	4	4	1	1	2656				614	614	614	0c5d6aed1d23427ac77815eabcecea75_2138	c4610aa9a2d5bacd833356b3605d9b21_2127	f0f6386fb62ec3a09e34ad652cf53efb_1847	S_aureus_10_00247
menD		2-succinyl-5-enolpyruvyl-6-hydroxy-3-cyclohexene-1-carboxylic-acid synthase	4	4	1	1	2550				1673	1673	1673	0c5d6aed1d23427ac77815eabcecea75_1925	c4610aa9a2d5bacd833356b3605d9b21_1912	f0f6386fb62ec3a09e34ad652cf53efb_2060	S_aureus_10_00348
WP_001109939.1		rod shape-determining protein RodA	4	4	1	1	1710				1202	1202	1202	0c5d6aed1d23427ac77815eabcecea75_4328	c4610aa9a2d5bacd833356b3605d9b21_4327	f0f6386fb62ec3a09e34ad652cf53efb_5273	S_aureus_10_02256
thiM		hydroxyethylthiazole kinase	4	4	1	1	1718				791	791	791	0c5d6aed1d23427ac77815eabcecea75_4344	c4610aa9a2d5bacd833356b3605d9b21_4343	f0f6386fb62ec3a09e34ad652cf53efb_5257	S_aureus_10_02248
pcp		pyroglutamyl-peptidase I	4	4	1	1	557				638	638	638	0c5d6aed1d23427ac77815eabcecea75_5601	c4610aa9a2d5bacd833356b3605d9b21_5600	f0f6386fb62ec3a09e34ad652cf53efb_3998	S_aureus_10_01175
WP_000417016.1		2-hydroxyacid dehydrogenase family protein	4	4	1	1	1917				953	953	953	0c5d6aed1d23427ac77815eabcecea75_4786	c4610aa9a2d5bacd833356b3605d9b21_4781	f0f6386fb62ec3a09e34ad652cf53efb_4811	S_aureus_10_01895
lukG		bi-component leukocidin LukGH subunit G	4	4	1	1	1646				1016	1016	1016	0c5d6aed1d23427ac77815eabcecea75_4183	c4610aa9a2d5bacd833356b3605d9b21_4182	f0f6386fb62ec3a09e34ad652cf53efb_5418	S_aureus_10_02305
WP_000678764.1		hypothetical protein	4	4	1	1	899				266	266	266	0c5d6aed1d23427ac77815eabcecea75_5187	c4610aa9a2d5bacd833356b3605d9b21_5182	f0f6386fb62ec3a09e34ad652cf53efb_4412	S_aureus_10_01370
WP_000638453.1		cytochrome d ubiquinol oxidase subunit II	4	4	1	1	2594				1019	1019	1019	0c5d6aed1d23427ac77815eabcecea75_2014	c4610aa9a2d5bacd833356b3605d9b21_2003	f0f6386fb62ec3a09e34ad652cf53efb_1971	S_aureus_10_00305
WP_001205732.1		hypothetical protein	4	4	1	1	1628				263	263	263	0c5d6aed1d23427ac77815eabcecea75_4149	c4610aa9a2d5bacd833356b3605d9b21_4148	f0f6386fb62ec3a09e34ad652cf53efb_5452	S_aureus_10_02287
panC		pantoate--beta-alanine ligase	4	4	1	1	458				851	851	851	0c5d6aed1d23427ac77815eabcecea75_5399	c4610aa9a2d5bacd833356b3605d9b21_5396	f0f6386fb62ec3a09e34ad652cf53efb_4200	S_aureus_10_01269
WP_000009238.1		hypothetical protein	4	4	1	1	1218				146	146	146	0c5d6aed1d23427ac77815eabcecea75_3135	c4610aa9a2d5bacd833356b3605d9b21_3129	f0f6386fb62ec3a09e34ad652cf53efb_842	S_aureus_10_01716
WP_000383814.1		DUF948 domain-containing protein	4	4	1	1	1330				491	491	491	0c5d6aed1d23427ac77815eabcecea75_3374	c4610aa9a2d5bacd833356b3605d9b21_3367	f0f6386fb62ec3a09e34ad652cf53efb_603	S_aureus_10_01997
WP_000184383.1		acyl-CoA thioesterase	4	4	1	1	1501				530	530	530	0c5d6aed1d23427ac77815eabcecea75_3905	c4610aa9a2d5bacd833356b3605d9b21_3904	f0f6386fb62ec3a09e34ad652cf53efb_199	S_aureus_10_02080
rnr		ribonuclease R	4	4	1	1	2380				2372	2372	2372	0c5d6aed1d23427ac77815eabcecea75_1572	c4610aa9a2d5bacd833356b3605d9b21_1560	f0f6386fb62ec3a09e34ad652cf53efb_2411	S_aureus_10_00513
WP_000966142.1		CcdC family protein	4	4	1	1	2018				467	467	467	0c5d6aed1d23427ac77815eabcecea75_2563	c4610aa9a2d5bacd833356b3605d9b21_2556	f0f6386fb62ec3a09e34ad652cf53efb_1416	S_aureus_10_00043
WP_045178105.1		HlyC/CorC family transporter	4	4	1	1	2425				1040	1040	1040	0c5d6aed1d23427ac77815eabcecea75_1668	c4610aa9a2d5bacd833356b3605d9b21_1656	f0f6386fb62ec3a09e34ad652cf53efb_2317	S_aureus_10_00469
WP_000088649.1		MBL fold metallo-hydrolase	4	4	1	1	600				800	800	800	0c5d6aed1d23427ac77815eabcecea75_53	c4610aa9a2d5bacd833356b3605d9b21_53	f0f6386fb62ec3a09e34ad652cf53efb_3904	S_aureus_10_01130
WP_000220938.1		single-stranded DNA-binding protein	4	4	1	1	913				281	281	281	0c5d6aed1d23427ac77815eabcecea75_5155	c4610aa9a2d5bacd833356b3605d9b21_5150	f0f6386fb62ec3a09e34ad652cf53efb_4442	S_aureus_10_01384
WP_000544969.1		type 1 glutamine amidotransferase	4	4	1	1	1487				731	731	731	0c5d6aed1d23427ac77815eabcecea75_3933	c4610aa9a2d5bacd833356b3605d9b21_3932	f0f6386fb62ec3a09e34ad652cf53efb_171	S_aureus_10_02093
WP_001837941.1		ATP-dependent DNA helicase DinG	4	4	1	1	285				2693	2693	2693	0c5d6aed1d23427ac77815eabcecea75_2795	c4610aa9a2d5bacd833356b3605d9b21_2789	f0f6386fb62ec3a09e34ad652cf53efb_1186	S_aureus_10_01551
hutI		imidazolonepropionase	4	4	1	1	1944				1238	1238	1238	0c5d6aed1d23427ac77815eabcecea75_4841	c4610aa9a2d5bacd833356b3605d9b21_4836	f0f6386fb62ec3a09e34ad652cf53efb_4756	S_aureus_10_01921
WP_000451438.1		helix-turn-helix transcriptional regulator	4	4	1	1	1748				335	335	335	0c5d6aed1d23427ac77815eabcecea75_4407	c4610aa9a2d5bacd833356b3605d9b21_4406	f0f6386fb62ec3a09e34ad652cf53efb_5194	S_aureus_10_02218
cls		cardiolipin synthase	4	4	1	1	2045				1481	1481	1481	0c5d6aed1d23427ac77815eabcecea75_2505	c4610aa9a2d5bacd833356b3605d9b21_2498	f0f6386fb62ec3a09e34ad652cf53efb_1474	S_aureus_10_00069
WP_001266541.1		fructose-specific PTS transporter subunit EIIC	4	4	1	1	2297				1958	1958	1958	0c5d6aed1d23427ac77815eabcecea75_1401	c4610aa9a2d5bacd833356b3605d9b21_1391	f0f6386fb62ec3a09e34ad652cf53efb_2582	S_aureus_10_00593
WP_025175432.1		TfoX/Sxy family protein	4	4	1	1	635				296	296	296	0c5d6aed1d23427ac77815eabcecea75_129	c4610aa9a2d5bacd833356b3605d9b21_127	f0f6386fb62ec3a09e34ad652cf53efb_3864	S_aureus_10_01092
WP_000159577.1		rRNA pseudouridine synthase	4	4	1	1	243				737	737	737	0c5d6aed1d23427ac77815eabcecea75_2874	c4610aa9a2d5bacd833356b3605d9b21_2868	f0f6386fb62ec3a09e34ad652cf53efb_1103	S_aureus_10_01588
WP_000910576.1		hypothetical protein	4	4	1	1	921				362	362	362	0c5d6aed1d23427ac77815eabcecea75_5139	c4610aa9a2d5bacd833356b3605d9b21_5134	f0f6386fb62ec3a09e34ad652cf53efb_4458	S_aureus_10_01392
WP_000174282.1		glycerophosphoryl diester phosphodiesterase	4	4	1	1	1307				743	743	743	0c5d6aed1d23427ac77815eabcecea75_3328	c4610aa9a2d5bacd833356b3605d9b21_3321	f0f6386fb62ec3a09e34ad652cf53efb_649	S_aureus_10_01979
WP_000883648.1		acetyl-CoA carboxylase carboxyltransferase subunit alpha	4	4	1	1	1286				944	944	944	0c5d6aed1d23427ac77815eabcecea75_3284	c4610aa9a2d5bacd833356b3605d9b21_3277	f0f6386fb62ec3a09e34ad652cf53efb_693	S_aureus_10_01959
lmrS		multidrug efflux MFS transporter LmrS	4	4	1	1	1786				1442	1442	1442	0c5d6aed1d23427ac77815eabcecea75_4518	c4610aa9a2d5bacd833356b3605d9b21_4515	f0f6386fb62ec3a09e34ad652cf53efb_5083	S_aureus_10_01770
pdxT		pyridoxal 5'-phosphate synthase glutaminase subunit PdxT	4	4	1	1	60				560	560	560	0c5d6aed1d23427ac77815eabcecea75_1034	c4610aa9a2d5bacd833356b3605d9b21_1028	f0f6386fb62ec3a09e34ad652cf53efb_2949	S_aureus_10_00771
WP_000084781.1		phosphatase PAP2 family protein	4	4	1	1	821				614	614	614	0c5d6aed1d23427ac77815eabcecea75_2716	c4610aa9a2d5bacd833356b3605d9b21_2708	f0f6386fb62ec3a09e34ad652cf53efb_1265	S_aureus_10_01512
WP_000157650.1		50S ribosomal protein L25/general stress protein Ctc	4	4	1	1	80				653	653	653	0c5d6aed1d23427ac77815eabcecea75_946	c4610aa9a2d5bacd833356b3605d9b21_940	f0f6386fb62ec3a09e34ad652cf53efb_3037	S_aureus_10_02558
WP_000708692.1		allophanate hydrolase subunit 1	4	4	1	1	2314				710	710	710	0c5d6aed1d23427ac77815eabcecea75_1435	c4610aa9a2d5bacd833356b3605d9b21_1425	f0f6386fb62ec3a09e34ad652cf53efb_2548	S_aureus_10_00577
WP_001215907.1		acylphosphatase	4	4	1	1	845				269	269	269	0c5d6aed1d23427ac77815eabcecea75_2684	c4610aa9a2d5bacd833356b3605d9b21_2676	f0f6386fb62ec3a09e34ad652cf53efb_1297	S_aureus_10_02605
WP_000335234.1		superantigen-like protein SSL12	4	4	1	1	2671				716	716	716	0c5d6aed1d23427ac77815eabcecea75_2174	c4610aa9a2d5bacd833356b3605d9b21_2163	f0f6386fb62ec3a09e34ad652cf53efb_1811	S_aureus_10_00232
gtfB		accessory Sec system glycosylation chaperone GtfB	4	4	1	1	514				1358	1358	1358	0c5d6aed1d23427ac77815eabcecea75_5517	c4610aa9a2d5bacd833356b3605d9b21_5514	f0f6386fb62ec3a09e34ad652cf53efb_4082	S_aureus_10_01218
WP_000581871.1		tandem-type lipoprotein	4	4	1	1	906				794	794	794	0c5d6aed1d23427ac77815eabcecea75_5173	c4610aa9a2d5bacd833356b3605d9b21_5168	f0f6386fb62ec3a09e34ad652cf53efb_4424	S_aureus_10_01377
WP_000646234.1		SDR family NAD(P)-dependent oxidoreductase	4	4	1	1	2092				704	704	704	0c5d6aed1d23427ac77815eabcecea75_2413	c4610aa9a2d5bacd833356b3605d9b21_2400	f0f6386fb62ec3a09e34ad652cf53efb_1568	S_aureus_10_00115
mnhE2		Na+/H+ antiporter Mnh2 subunit E	4	4	1	1	2225				482	482	482	0c5d6aed1d23427ac77815eabcecea75_1253	c4610aa9a2d5bacd833356b3605d9b21_1245	f0f6386fb62ec3a09e34ad652cf53efb_2730	S_aureus_10_00665
WP_000882092.1		DUF443 family protein	4	4	1	1	2199				620	620	620	0c5d6aed1d23427ac77815eabcecea75_1197	c4610aa9a2d5bacd833356b3605d9b21_1191	f0f6386fb62ec3a09e34ad652cf53efb_2786	S_aureus_10_00692
WP_000971980.1		hypothetical protein	4	4	1	1	1933				191	191	191	0c5d6aed1d23427ac77815eabcecea75_4818	c4610aa9a2d5bacd833356b3605d9b21_4813	f0f6386fb62ec3a09e34ad652cf53efb_4779	S_aureus_10_01910
clpP		ATP-dependent Clp endopeptidase proteolytic subunit ClpP	4	4	1	1	2368				587	587	587	0c5d6aed1d23427ac77815eabcecea75_1548	c4610aa9a2d5bacd833356b3605d9b21_1536	f0f6386fb62ec3a09e34ad652cf53efb_2435	S_aureus_10_00525
WP_000999716.1		aromatic acid exporter family protein	4	4	1	1	1490				986	986	986	0c5d6aed1d23427ac77815eabcecea75_3927	c4610aa9a2d5bacd833356b3605d9b21_3926	f0f6386fb62ec3a09e34ad652cf53efb_177	S_aureus_10_02091
rplN		50S ribosomal protein L14	4	4	1	1	1852				368	368	368	0c5d6aed1d23427ac77815eabcecea75_4654	c4610aa9a2d5bacd833356b3605d9b21_4649	f0f6386fb62ec3a09e34ad652cf53efb_4943	S_aureus_10_01833
trpD		anthranilate phosphoribosyltransferase	4	4	1	1	1994				998	998	998	0c5d6aed1d23427ac77815eabcecea75_2611	c4610aa9a2d5bacd833356b3605d9b21_2604	f0f6386fb62ec3a09e34ad652cf53efb_1368	S_aureus_10_00020
dltB		PG:teichoic acid D-alanyltransferase DltB	4	4	1	1	2439				1214	1214	1214	0c5d6aed1d23427ac77815eabcecea75_1696	c4610aa9a2d5bacd833356b3605d9b21_1684	f0f6386fb62ec3a09e34ad652cf53efb_2289	S_aureus_10_00456
WP_000127594.1		alanine racemase	4	4	1	1	840				1085	1085	1085	0c5d6aed1d23427ac77815eabcecea75_2674	c4610aa9a2d5bacd833356b3605d9b21_2666	f0f6386fb62ec3a09e34ad652cf53efb_1307	S_aureus_10_02610
WP_000571167.1		ABC transporter ATP-binding protein	4	4	1	1	2539				641	641	641	0c5d6aed1d23427ac77815eabcecea75_1903	c4610aa9a2d5bacd833356b3605d9b21_1890	f0f6386fb62ec3a09e34ad652cf53efb_2082	S_aureus_10_00357
WP_000138487.1		Glu/Leu/Phe/Val dehydrogenase	4	4	1	1	2464				1244	1244	1244	0c5d6aed1d23427ac77815eabcecea75_1746	c4610aa9a2d5bacd833356b3605d9b21_1734	f0f6386fb62ec3a09e34ad652cf53efb_2239	S_aureus_10_00431
WP_045178103.1		sulfite exporter TauE/SafE family protein	4	4	1	1	2428				827	827	827	0c5d6aed1d23427ac77815eabcecea75_1674	c4610aa9a2d5bacd833356b3605d9b21_1662	f0f6386fb62ec3a09e34ad652cf53efb_2311	S_aureus_10_00466
WP_045178302.1		thiolase family protein	4	4	1	1	770				1184	1184	1184	0c5d6aed1d23427ac77815eabcecea75_403	c4610aa9a2d5bacd833356b3605d9b21_399	f0f6386fb62ec3a09e34ad652cf53efb_3584	S_aureus_10_00959
WP_000688498.1		LytTR family DNA-binding domain-containing protein	4	4	1	1	1662				716	716	716	0c5d6aed1d23427ac77815eabcecea75_4215	c4610aa9a2d5bacd833356b3605d9b21_4214	f0f6386fb62ec3a09e34ad652cf53efb_5386	S_aureus_10_02321
mprF		bifunctional lysylphosphatidylglycerol flippase/synthetase MprF	4	4	1	1	2003				2522	2522	2522	0c5d6aed1d23427ac77815eabcecea75_2593	c4610aa9a2d5bacd833356b3605d9b21_2586	f0f6386fb62ec3a09e34ad652cf53efb_1386	S_aureus_10_00029
rplA		50S ribosomal protein L1	4	4	1	1	41				692	692	692	0c5d6aed1d23427ac77815eabcecea75_1072	c4610aa9a2d5bacd833356b3605d9b21_1066	f0f6386fb62ec3a09e34ad652cf53efb_2911	S_aureus_10_00753
WP_000882069.1		UvrB/UvrC motif-containing protein	4	4	1	1	57				566	566	566	0c5d6aed1d23427ac77815eabcecea75_1040	c4610aa9a2d5bacd833356b3605d9b21_1034	f0f6386fb62ec3a09e34ad652cf53efb_2943	S_aureus_10_00768
WP_000370182.1		Mini-ribonuclease 3	4	4	1	1	49				404	404	404	0c5d6aed1d23427ac77815eabcecea75_1056	c4610aa9a2d5bacd833356b3605d9b21_1050	f0f6386fb62ec3a09e34ad652cf53efb_2927	S_aureus_10_00760
WP_000685073.1		class I SAM-dependent rRNA methyltransferase	4	4	1	1	2588				1172	1172	1172	0c5d6aed1d23427ac77815eabcecea75_2002	c4610aa9a2d5bacd833356b3605d9b21_1991	f0f6386fb62ec3a09e34ad652cf53efb_1983	S_aureus_10_00311
isaA		lytic transglycosylase IsaA	4	4	1	1	431				701	701	701	0c5d6aed1d23427ac77815eabcecea75_5345	c4610aa9a2d5bacd833356b3605d9b21_5342	f0f6386fb62ec3a09e34ad652cf53efb_4254	S_aureus_10_01295
WP_000435045.1		DedA family protein	4	4	1	1	879				611	611	611	0c5d6aed1d23427ac77815eabcecea75_5227	c4610aa9a2d5bacd833356b3605d9b21_5224	f0f6386fb62ec3a09e34ad652cf53efb_4372	S_aureus_10_01351
WP_000714373.1		hypothetical protein	4	4	1	1	640				482	482	482	0c5d6aed1d23427ac77815eabcecea75_139	c4610aa9a2d5bacd833356b3605d9b21_137	f0f6386fb62ec3a09e34ad652cf53efb_3854	S_aureus_10_01087
WP_000392691.1		transcriptional repressor	4	4	1	1	238				449	449	449	0c5d6aed1d23427ac77815eabcecea75_2884	c4610aa9a2d5bacd833356b3605d9b21_2878	f0f6386fb62ec3a09e34ad652cf53efb_1093	S_aureus_10_01593
folB		dihydroneopterin aldolase	4	4	1	1	66				365	365	365	0c5d6aed1d23427ac77815eabcecea75_974	c4610aa9a2d5bacd833356b3605d9b21_968	f0f6386fb62ec3a09e34ad652cf53efb_3009	S_aureus_10_02544
rpsS		30S ribosomal protein S19	4	4	1	1	1858				278	278	278	0c5d6aed1d23427ac77815eabcecea75_4666	c4610aa9a2d5bacd833356b3605d9b21_4661	f0f6386fb62ec3a09e34ad652cf53efb_4931	S_aureus_10_01839
WP_045177693.1		Txe/YoeB family addiction module toxin	4	4	1	1	935				266	266	266	0c5d6aed1d23427ac77815eabcecea75_5111	c4610aa9a2d5bacd833356b3605d9b21_5106	f0f6386fb62ec3a09e34ad652cf53efb_4486	S_aureus_10_01406
tagG		teichoic acids export ABC transporter permease subunit TagG	4	4	1	1	2235				812	812	812	0c5d6aed1d23427ac77815eabcecea75_1275	c4610aa9a2d5bacd833356b3605d9b21_1265	f0f6386fb62ec3a09e34ad652cf53efb_2708	S_aureus_10_00654
WP_000819691.1		spermidine/putrescine ABC transporter substrate-binding protein	4	4	1	1	2610				1073	1073	1073	0c5d6aed1d23427ac77815eabcecea75_2046	c4610aa9a2d5bacd833356b3605d9b21_2035	f0f6386fb62ec3a09e34ad652cf53efb_1939	S_aureus_10_00290
WP_000166919.1		M23 family metallopeptidase	4	4	1	1	751				578	578	578	0c5d6aed1d23427ac77815eabcecea75_365	c4610aa9a2d5bacd833356b3605d9b21_361	f0f6386fb62ec3a09e34ad652cf53efb_3628	S_aureus_10_00977
WP_000323160.1		SLC13 family permease	4	4	1	1	1460				1562	1562	1562	0c5d6aed1d23427ac77815eabcecea75_3991	c4610aa9a2d5bacd833356b3605d9b21_3990	f0f6386fb62ec3a09e34ad652cf53efb_113	S_aureus_10_02119
WP_000727328.1		DUF4889 domain-containing protein	4	4	1	1	1012				356	356	356	0c5d6aed1d23427ac77815eabcecea75_4951	c4610aa9a2d5bacd833356b3605d9b21_4948	f0f6386fb62ec3a09e34ad652cf53efb_4646	S_aureus_10_01479
adsA		LPXTG-anchored adenosine synthase AdsA	4	4	1	1	601				2318	2318	2318	0c5d6aed1d23427ac77815eabcecea75_55	c4610aa9a2d5bacd833356b3605d9b21_55	f0f6386fb62ec3a09e34ad652cf53efb_3902	S_aureus_10_01129
rarD		EamA family transporter RarD	4	4	1	1	561				908	908	908	0c5d6aed1d23427ac77815eabcecea75_5609	c4610aa9a2d5bacd833356b3605d9b21_5608	f0f6386fb62ec3a09e34ad652cf53efb_3990	S_aureus_10_01171
WP_001549802.1		hypothetical protein	4	4	1	1	862				170	170	170	0c5d6aed1d23427ac77815eabcecea75_5263	c4610aa9a2d5bacd833356b3605d9b21_5260	f0f6386fb62ec3a09e34ad652cf53efb_4336	S_aureus_10_01334
WP_000221179.1		metalloregulator ArsR/SmtB family transcription factor	4	4	1	1	1362				314	314	314	0c5d6aed1d23427ac77815eabcecea75_3439	c4610aa9a2d5bacd833356b3605d9b21_3432	f0f6386fb62ec3a09e34ad652cf53efb_538	S_aureus_10_02028
WP_001037807.1		DoxX family protein	4	4	1	1	2304				473	473	473	0c5d6aed1d23427ac77815eabcecea75_1415	c4610aa9a2d5bacd833356b3605d9b21_1405	f0f6386fb62ec3a09e34ad652cf53efb_2568	S_aureus_10_00586
adcA		zinc ABC transporter substrate-binding lipoprotein AdcA	4	4	1	1	989				1550	1550	1550	0c5d6aed1d23427ac77815eabcecea75_4997	c4610aa9a2d5bacd833356b3605d9b21_4994	f0f6386fb62ec3a09e34ad652cf53efb_4600	S_aureus_10_01456
WP_045178342.1		non-ribosomal peptide synthetase	4	4	1	1	723				7175	7175	7175	0c5d6aed1d23427ac77815eabcecea75_309	c4610aa9a2d5bacd833356b3605d9b21_305	f0f6386fb62ec3a09e34ad652cf53efb_3684	S_aureus_10_01004
WP_000814441.1		alpha/beta hydrolase	4	4	1	1	637				914	914	914	0c5d6aed1d23427ac77815eabcecea75_133	c4610aa9a2d5bacd833356b3605d9b21_131	f0f6386fb62ec3a09e34ad652cf53efb_3860	S_aureus_10_01090
rplF		50S ribosomal protein L6	4	4	1	1	1847				536	536	536	0c5d6aed1d23427ac77815eabcecea75_4644	c4610aa9a2d5bacd833356b3605d9b21_4639	f0f6386fb62ec3a09e34ad652cf53efb_4953	S_aureus_10_01828
capN		capsular polysaccharide type 5/8 biosynthesis epimerase CapN	4	4	1	1	707				887	887	887	0c5d6aed1d23427ac77815eabcecea75_277	c4610aa9a2d5bacd833356b3605d9b21_273	f0f6386fb62ec3a09e34ad652cf53efb_3716	S_aureus_10_01020
cntA		staphylopine-dependent metal ABC transporter substrate-binding protein CntA	4	4	1	1	925				1598	1598	1598	0c5d6aed1d23427ac77815eabcecea75_5131	c4610aa9a2d5bacd833356b3605d9b21_5126	f0f6386fb62ec3a09e34ad652cf53efb_4466	S_aureus_10_01396
nrdG		anaerobic ribonucleoside-triphosphate reductase activating protein	4	4	1	1	478				536	536	536	0c5d6aed1d23427ac77815eabcecea75_5443	c4610aa9a2d5bacd833356b3605d9b21_5440	f0f6386fb62ec3a09e34ad652cf53efb_4156	S_aureus_10_01251
WP_001549577.1		YjiH family protein	4	4	1	1	1793				1370	1370	1370	0c5d6aed1d23427ac77815eabcecea75_4532	c4610aa9a2d5bacd833356b3605d9b21_4529	f0f6386fb62ec3a09e34ad652cf53efb_5069	S_aureus_10_01777
WP_000598444.1		YutD family protein	4	4	1	1	2431				383	383	383	0c5d6aed1d23427ac77815eabcecea75_1680	c4610aa9a2d5bacd833356b3605d9b21_1668	f0f6386fb62ec3a09e34ad652cf53efb_2305	S_aureus_10_00463
WP_000788441.1		hypothetical protein	4	4	1	1	1864				389	389	389	0c5d6aed1d23427ac77815eabcecea75_4678	c4610aa9a2d5bacd833356b3605d9b21_4673	f0f6386fb62ec3a09e34ad652cf53efb_4919	S_aureus_10_01845
WP_000434765.1		phosphotransferase family protein	4	4	1	1	1340				791	791	791	0c5d6aed1d23427ac77815eabcecea75_3394	c4610aa9a2d5bacd833356b3605d9b21_3387	f0f6386fb62ec3a09e34ad652cf53efb_583	S_aureus_10_02007
WP_000070811.1		hypothetical protein	4	4	1	1	1393				383	383	383	0c5d6aed1d23427ac77815eabcecea75_3502	c4610aa9a2d5bacd833356b3605d9b21_3495	f0f6386fb62ec3a09e34ad652cf53efb_477	S_aureus_10_02058
WP_000842860.1		DUF1129 family protein	4	4	1	1	2272				689	689	689	0c5d6aed1d23427ac77815eabcecea75_1351	c4610aa9a2d5bacd833356b3605d9b21_1341	f0f6386fb62ec3a09e34ad652cf53efb_2632	S_aureus_10_00618
pckA		phosphoenolpyruvate carboxykinase (ATP)	4	4	1	1	1378				1592	1592	1592	0c5d6aed1d23427ac77815eabcecea75_3472	c4610aa9a2d5bacd833356b3605d9b21_3465	f0f6386fb62ec3a09e34ad652cf53efb_505	S_aureus_10_02044
sgtB		monofunctional peptidoglycan glycosyltransferase SgtB	4	4	1	1	1505				809	809	809	0c5d6aed1d23427ac77815eabcecea75_3897	c4610aa9a2d5bacd833356b3605d9b21_3896	f0f6386fb62ec3a09e34ad652cf53efb_207	S_aureus_10_02076
WP_001159765.1		hypothetical protein	4	4	1	1	811				392	392	392	0c5d6aed1d23427ac77815eabcecea75_493	c4610aa9a2d5bacd833356b3605d9b21_489	f0f6386fb62ec3a09e34ad652cf53efb_3494	S_aureus_10_00918
gtxA		flippase GtxA	4	4	1	1	962				386	386	386	0c5d6aed1d23427ac77815eabcecea75_5057	c4610aa9a2d5bacd833356b3605d9b21_5052	f0f6386fb62ec3a09e34ad652cf53efb_4540	S_aureus_10_01431
lrgB		antiholin-like protein LrgB	4	4	1	1	801				701	701	701	0c5d6aed1d23427ac77815eabcecea75_471	c4610aa9a2d5bacd833356b3605d9b21_467	f0f6386fb62ec3a09e34ad652cf53efb_3516	S_aureus_10_00927
WP_000876826.1		IDEAL domain-containing protein	4	4	1	1	2530				218	218	218	0c5d6aed1d23427ac77815eabcecea75_1885	c4610aa9a2d5bacd833356b3605d9b21_1872	f0f6386fb62ec3a09e34ad652cf53efb_2100	S_aureus_10_00363
vraG		ABC transporter permease VraG	4	4	1	1	2259				1889	1889	1889	0c5d6aed1d23427ac77815eabcecea75_1323	c4610aa9a2d5bacd833356b3605d9b21_1313	f0f6386fb62ec3a09e34ad652cf53efb_2660	S_aureus_10_00631
WP_001030463.1		hypothetical protein	4	4	1	1	1369				443	443	443	0c5d6aed1d23427ac77815eabcecea75_3453	c4610aa9a2d5bacd833356b3605d9b21_3446	f0f6386fb62ec3a09e34ad652cf53efb_524	S_aureus_10_02035
WP_045178262.1		MFS transporter	4	4	1	1	379				1376	1376	1376	0c5d6aed1d23427ac77815eabcecea75_497	c4610aa9a2d5bacd833356b3605d9b21_493	f0f6386fb62ec3a09e34ad652cf53efb_3490	S_aureus_10_00916
WP_000132890.1		alpha/beta hydrolase	4	4	1	1	1548				554	554	554	0c5d6aed1d23427ac77815eabcecea75_3714	c4610aa9a2d5bacd833356b3605d9b21_3713	f0f6386fb62ec3a09e34ad652cf53efb_393	S_aureus_10_02457
WP_000769694.1		MAP domain-containing protein	4	4	1	1	2486				434	434	434	0c5d6aed1d23427ac77815eabcecea75_1790	c4610aa9a2d5bacd833356b3605d9b21_1778	f0f6386fb62ec3a09e34ad652cf53efb_2195	S_aureus_10_00409
graX		auxiliary protein GraX/ApsX	4	4	1	1	2255				923	923	923	0c5d6aed1d23427ac77815eabcecea75_1315	c4610aa9a2d5bacd833356b3605d9b21_1305	f0f6386fb62ec3a09e34ad652cf53efb_2668	S_aureus_10_00635
WP_045177706.1		hypothetical protein	4	4	1	1	909				287	287	287	0c5d6aed1d23427ac77815eabcecea75_5167	c4610aa9a2d5bacd833356b3605d9b21_5162	f0f6386fb62ec3a09e34ad652cf53efb_4430	S_aureus_10_01380
WP_045177260.1		hypothetical protein	4	4	1	1	1390				572	572	572	0c5d6aed1d23427ac77815eabcecea75_3494	c4610aa9a2d5bacd833356b3605d9b21_3487	f0f6386fb62ec3a09e34ad652cf53efb_483	S_aureus_10_02055
lpdA		dihydrolipoyl dehydrogenase	4	4	1	1	1115				1421	1421	1421	0c5d6aed1d23427ac77815eabcecea75_2926	c4610aa9a2d5bacd833356b3605d9b21_2920	f0f6386fb62ec3a09e34ad652cf53efb_1051	S_aureus_10_01613
WP_001058111.1		SprT family protein	4	4	1	1	1688				455	455	455	0c5d6aed1d23427ac77815eabcecea75_4284	c4610aa9a2d5bacd833356b3605d9b21_4283	f0f6386fb62ec3a09e34ad652cf53efb_5317	S_aureus_10_02277
WP_001641468.1		hypothetical protein	4	4	1	1	2054				269	269	269	0c5d6aed1d23427ac77815eabcecea75_2489	c4610aa9a2d5bacd833356b3605d9b21_2480	f0f6386fb62ec3a09e34ad652cf53efb_1490	S_aureus_10_00077
WP_000704122.1		Rrf2 family transcriptional regulator	4	4	1	1	1220				422	422	422	0c5d6aed1d23427ac77815eabcecea75_3139	c4610aa9a2d5bacd833356b3605d9b21_3133	f0f6386fb62ec3a09e34ad652cf53efb_838	S_aureus_10_01718
purH		bifunctional phosphoribosylaminoimidazolecarboxamide formyltransferase/IMP cyclohydrolase	4	4	1	1	2580				1478	1478	1478	0c5d6aed1d23427ac77815eabcecea75_1987	c4610aa9a2d5bacd833356b3605d9b21_1974	f0f6386fb62ec3a09e34ad652cf53efb_1998	S_aureus_10_00319
ahpC		peroxiredoxin	4	4	1	1	182				569	569	569	0c5d6aed1d23427ac77815eabcecea75_722	c4610aa9a2d5bacd833356b3605d9b21_718	f0f6386fb62ec3a09e34ad652cf53efb_3261	S_aureus_10_00807
WP_000184229.1		hypothetical protein	4	4	1	1	1964				638	638	638	0c5d6aed1d23427ac77815eabcecea75_4883	c4610aa9a2d5bacd833356b3605d9b21_4878	f0f6386fb62ec3a09e34ad652cf53efb_4714	S_aureus_10_01940
sarA		global transcriptional regulator SarA	4	4	1	1	2217				374	374	374	0c5d6aed1d23427ac77815eabcecea75_1235	c4610aa9a2d5bacd833356b3605d9b21_1229	f0f6386fb62ec3a09e34ad652cf53efb_2748	S_aureus_10_00674
WP_000573242.1		oxidoreductase	4	4	1	1	1024				1004	1004	1004	0c5d6aed1d23427ac77815eabcecea75_4927	c4610aa9a2d5bacd833356b3605d9b21_4924	f0f6386fb62ec3a09e34ad652cf53efb_4670	S_aureus_10_01490
WP_000691765.1		RidA family protein	4	4	1	1	85				380	380	380	0c5d6aed1d23427ac77815eabcecea75_936	c4610aa9a2d5bacd833356b3605d9b21_930	f0f6386fb62ec3a09e34ad652cf53efb_3047	S_aureus_10_02562
WP_000610203.1		ribitol-5-phosphate dehydrogenase	4	4	1	1	794				1025	1025	1025	0c5d6aed1d23427ac77815eabcecea75_457	c4610aa9a2d5bacd833356b3605d9b21_453	f0f6386fb62ec3a09e34ad652cf53efb_3530	S_aureus_10_00934
WP_000886465.1		membrane protein	4	4	1	1	1509				836	836	836	0c5d6aed1d23427ac77815eabcecea75_3889	c4610aa9a2d5bacd833356b3605d9b21_3888	f0f6386fb62ec3a09e34ad652cf53efb_215	S_aureus_10_02072
WP_000520233.1		ABC transporter permease	4	4	1	1	2415				695	695	695	0c5d6aed1d23427ac77815eabcecea75_1646	c4610aa9a2d5bacd833356b3605d9b21_1634	f0f6386fb62ec3a09e34ad652cf53efb_2339	S_aureus_10_00479
sbnF		3-(L-alanin-3-ylcarbamoyl)-2-[(2-aminoethylcarbamoyl)methyl]-2-hydroxypropanoate synthase SbnF	4	4	1	1	666				1778	1850	1832	0c5d6aed1d23427ac77815eabcecea75_193	c4610aa9a2d5bacd833356b3605d9b21_191	f0f6386fb62ec3a09e34ad652cf53efb_3800	S_aureus_10_01061
WP_031585657.1		zinc ribbon domain-containing protein	4	4	1	1	1970				1382	1382	1382	0c5d6aed1d23427ac77815eabcecea75_4895	c4610aa9a2d5bacd833356b3605d9b21_4890	f0f6386fb62ec3a09e34ad652cf53efb_4702	S_aureus_10_01945
WP_000652047.1		aminotransferase class I/II-fold pyridoxal phosphate-dependent enzyme	4	4	1	1	2066				1238	1238	1238	0c5d6aed1d23427ac77815eabcecea75_2465	c4610aa9a2d5bacd833356b3605d9b21_2452	f0f6386fb62ec3a09e34ad652cf53efb_1516	S_aureus_10_00089
hyl		alpha-hemolysin	4	4	1	1	2669				959	959	959	0c5d6aed1d23427ac77815eabcecea75_2168	c4610aa9a2d5bacd833356b3605d9b21_2157	f0f6386fb62ec3a09e34ad652cf53efb_1817	S_aureus_10_00234
blaZ		penicillin-hydrolyzing class A beta-lactamase BlaZ	4	4	1	2	17				845	845	845	0c5d6aed1d23427ac77815eabcecea75_5668	c4610aa9a2d5bacd833356b3605d9b21_5681	f0f6386fb62ec3a09e34ad652cf53efb_5521	S_aureus_10_02589
WP_001100838.1		long-chain fatty acid--CoA ligase	4	4	1	1	2174				1376	1376	1376	0c5d6aed1d23427ac77815eabcecea75_1145	c4610aa9a2d5bacd833356b3605d9b21_1139	f0f6386fb62ec3a09e34ad652cf53efb_2838	S_aureus_10_00716
group_2405	ptsG	glucose-specific PTS transporter subunit IIBC	4	4	1	1	734				2045	2045	2045	0c5d6aed1d23427ac77815eabcecea75_331	c4610aa9a2d5bacd833356b3605d9b21_327	f0f6386fb62ec3a09e34ad652cf53efb_3662	S_aureus_10_00994
WP_000449218.1		NAD(P)H-hydrate dehydratase	4	4	1	1	585				812	812	812	0c5d6aed1d23427ac77815eabcecea75_15	c4610aa9a2d5bacd833356b3605d9b21_15	f0f6386fb62ec3a09e34ad652cf53efb_3942	S_aureus_10_01147
WP_000638475.1		2-C-methyl-D-erythritol 4-phosphate cytidylyltransferase	4	4	1	1	789				716	716	716	0c5d6aed1d23427ac77815eabcecea75_447	c4610aa9a2d5bacd833356b3605d9b21_443	f0f6386fb62ec3a09e34ad652cf53efb_3540	S_aureus_10_00939
WP_000934515.1		DUF5327 family protein	4	4	1	1	2181				377	377	377	0c5d6aed1d23427ac77815eabcecea75_1159	c4610aa9a2d5bacd833356b3605d9b21_1153	f0f6386fb62ec3a09e34ad652cf53efb_2824	S_aureus_10_00709
tsaD		tRNA (adenosine(37)-N6)-threonylcarbamoyltransferase complex transferase subunit TsaD	4	4	1	1	1673				1025	1025	1025	0c5d6aed1d23427ac77815eabcecea75_4239	c4610aa9a2d5bacd833356b3605d9b21_4238	f0f6386fb62ec3a09e34ad652cf53efb_5362	S_aureus_10_02331
WP_000193928.1		hypothetical protein	4	4	1	1	1329				1352	1352	1352	0c5d6aed1d23427ac77815eabcecea75_3372	c4610aa9a2d5bacd833356b3605d9b21_3365	f0f6386fb62ec3a09e34ad652cf53efb_605	S_aureus_10_01996
WP_001117064.1		DivIVA domain-containing protein	4	4	1	1	2699				617	617	617	0c5d6aed1d23427ac77815eabcecea75_2233	c4610aa9a2d5bacd833356b3605d9b21_2222	f0f6386fb62ec3a09e34ad652cf53efb_1748	S_aureus_10_00203
WP_000197271.1		5'-3'-deoxyribonucleotidase	4	4	1	1	2321				542	542	542	0c5d6aed1d23427ac77815eabcecea75_1451	c4610aa9a2d5bacd833356b3605d9b21_1441	f0f6386fb62ec3a09e34ad652cf53efb_2532	S_aureus_10_00569
WP_000643623.1		tandem-type lipoprotein	4	4	1	1	749				773	773	773	0c5d6aed1d23427ac77815eabcecea75_361	c4610aa9a2d5bacd833356b3605d9b21_357	f0f6386fb62ec3a09e34ad652cf53efb_3632	S_aureus_10_00979
argR		transcriptional regulator ArgR	4	4	1	1	1117				452	452	452	0c5d6aed1d23427ac77815eabcecea75_2930	c4610aa9a2d5bacd833356b3605d9b21_2924	f0f6386fb62ec3a09e34ad652cf53efb_1047	S_aureus_10_01615
WP_000160435.1		CBS domain-containing protein	4	4	1	1	1291				1298	1298	1298	0c5d6aed1d23427ac77815eabcecea75_3294	c4610aa9a2d5bacd833356b3605d9b21_3287	f0f6386fb62ec3a09e34ad652cf53efb_683	S_aureus_10_01964
WP_001020016.1		YhgE/Pip domain-containing protein	4	4	1	1	1019				1277	1277	1277	0c5d6aed1d23427ac77815eabcecea75_4937	c4610aa9a2d5bacd833356b3605d9b21_4934	f0f6386fb62ec3a09e34ad652cf53efb_4660	S_aureus_10_01486
WP_001151997.1		ferredoxin	4	4	1	1	255				248	248	248	0c5d6aed1d23427ac77815eabcecea75_2855	c4610aa9a2d5bacd833356b3605d9b21_2849	f0f6386fb62ec3a09e34ad652cf53efb_1126	S_aureus_10_01578
WP_000503820.1		molybdenum cofactor biosynthesis protein MoaB	4	4	1	1	1888				506	506	506	0c5d6aed1d23427ac77815eabcecea75_4728	c4610aa9a2d5bacd833356b3605d9b21_4723	f0f6386fb62ec3a09e34ad652cf53efb_4869	S_aureus_10_01867
WP_000195826.1		DUF1381 domain-containing protein	4	4	1	1	1089				206	206	206	0c5d6aed1d23427ac77815eabcecea75_4119	c4610aa9a2d5bacd833356b3605d9b21_4118	f0f6386fb62ec3a09e34ad652cf53efb_5482	S_aureus_10_02173
WP_000837105.1		ABC transporter substrate-binding protein	4	4	1	1	763				968	968	968	0c5d6aed1d23427ac77815eabcecea75_389	c4610aa9a2d5bacd833356b3605d9b21_385	f0f6386fb62ec3a09e34ad652cf53efb_3604	S_aureus_10_00965
WP_000390575.1		metal-sulfur cluster assembly factor	4	4	1	1	2478				308	308	308	0c5d6aed1d23427ac77815eabcecea75_1774	c4610aa9a2d5bacd833356b3605d9b21_1762	f0f6386fb62ec3a09e34ad652cf53efb_2211	S_aureus_10_00417
WP_000927340.1		BglG family transcription antiterminator	4	4	1	1	1777				2132	2132	2132	0c5d6aed1d23427ac77815eabcecea75_4471	c4610aa9a2d5bacd833356b3605d9b21_4468	f0f6386fb62ec3a09e34ad652cf53efb_5130	S_aureus_10_02189
cap8L		type 8 capsular polysaccharide synthesis protein Cap8L	4	4	1	1	705				1205	1205	1205	0c5d6aed1d23427ac77815eabcecea75_273	c4610aa9a2d5bacd833356b3605d9b21_269	f0f6386fb62ec3a09e34ad652cf53efb_3720	S_aureus_10_01022
WP_000960854.1		L-lactate permease	4	4	1	1	1028				1598	1598	1598	0c5d6aed1d23427ac77815eabcecea75_4919	c4610aa9a2d5bacd833356b3605d9b21_4916	f0f6386fb62ec3a09e34ad652cf53efb_4678	S_aureus_10_01494
bstA		bacillithiol transferase BstA	4	4	1	1	558				464	464	464	0c5d6aed1d23427ac77815eabcecea75_5603	c4610aa9a2d5bacd833356b3605d9b21_5602	f0f6386fb62ec3a09e34ad652cf53efb_3996	S_aureus_10_01174
WP_001133523.1		phage tail tape measure protein	4	4	1	1	1067				4649	4649	4649	0c5d6aed1d23427ac77815eabcecea75_4075	c4610aa9a2d5bacd833356b3605d9b21_4074	f0f6386fb62ec3a09e34ad652cf53efb_29	S_aureus_10_02153
WP_001566903.1		ParB/RepB/Spo0J family partition protein	4	4	1	1	205				845	845	845	0c5d6aed1d23427ac77815eabcecea75_680	c4610aa9a2d5bacd833356b3605d9b21_674	f0f6386fb62ec3a09e34ad652cf53efb_3303	S_aureus_10_00827
obgE		GTPase ObgE	4	4	1	1	1237				1292	1292	1292	0c5d6aed1d23427ac77815eabcecea75_3178	c4610aa9a2d5bacd833356b3605d9b21_3172	f0f6386fb62ec3a09e34ad652cf53efb_799	S_aureus_10_01735
WP_045176823.1		XRE family transcriptional regulator	4	4	1	1	692				1175	1175	1175	0c5d6aed1d23427ac77815eabcecea75_247	c4610aa9a2d5bacd833356b3605d9b21_243	f0f6386fb62ec3a09e34ad652cf53efb_3746	S_aureus_10_01035
ureC		urease subunit alpha	4	4	1	1	1902				1715	1715	1715	0c5d6aed1d23427ac77815eabcecea75_4756	c4610aa9a2d5bacd833356b3605d9b21_4751	f0f6386fb62ec3a09e34ad652cf53efb_4841	S_aureus_10_01881
WP_001080281.1		hypothetical protein	4	4	1	1	957				656	656	656	0c5d6aed1d23427ac77815eabcecea75_5067	c4610aa9a2d5bacd833356b3605d9b21_5062	f0f6386fb62ec3a09e34ad652cf53efb_4530	S_aureus_10_01426
WP_000128655.1		hypothetical protein	4	4	1	1	1962				419	419	419	0c5d6aed1d23427ac77815eabcecea75_4879	c4610aa9a2d5bacd833356b3605d9b21_4874	f0f6386fb62ec3a09e34ad652cf53efb_4718	S_aureus_10_01938
uhpT		hexose-6-phosphate:phosphate antiporter	4	4	1	1	760				1379	1379	1379	0c5d6aed1d23427ac77815eabcecea75_383	c4610aa9a2d5bacd833356b3605d9b21_379	f0f6386fb62ec3a09e34ad652cf53efb_3610	S_aureus_10_00968
czrB		CDF family zinc efflux transporter CzrB	4	4	1	1	1771				980	980	980	0c5d6aed1d23427ac77815eabcecea75_4453	c4610aa9a2d5bacd833356b3605d9b21_4452	f0f6386fb62ec3a09e34ad652cf53efb_5148	S_aureus_10_02195
pcrA		DNA helicase PcrA	4	4	1	1	1472				2192	2192	2192	0c5d6aed1d23427ac77815eabcecea75_3965	c4610aa9a2d5bacd833356b3605d9b21_3964	f0f6386fb62ec3a09e34ad652cf53efb_139	S_aureus_10_02107
glmM		phosphoglucosamine mutase	4	4	1	1	1781				1355	1355	1355	0c5d6aed1d23427ac77815eabcecea75_4479	c4610aa9a2d5bacd833356b3605d9b21_4476	f0f6386fb62ec3a09e34ad652cf53efb_5122	S_aureus_10_02185
WP_000487150.1		class I SAM-dependent RNA methyltransferase	4	4	1	1	296				1145	1145	1145	0c5d6aed1d23427ac77815eabcecea75_2770	c4610aa9a2d5bacd833356b3605d9b21_2764	f0f6386fb62ec3a09e34ad652cf53efb_1211	S_aureus_10_01540
efb		complement convertase inhibitor Efb	4	4	1	1	2665				497	497	497	0c5d6aed1d23427ac77815eabcecea75_2160	c4610aa9a2d5bacd833356b3605d9b21_2149	f0f6386fb62ec3a09e34ad652cf53efb_1825	S_aureus_10_00238
WP_000902175.1		DUF6501 family protein	4	4	1	1	827				203	203	203	0c5d6aed1d23427ac77815eabcecea75_2700	c4610aa9a2d5bacd833356b3605d9b21_2692	f0f6386fb62ec3a09e34ad652cf53efb_1281	S_aureus_10_01506
WP_000161829.1		SDR family NAD(P)-dependent oxidoreductase	4	4	1	1	441				704	704	704	0c5d6aed1d23427ac77815eabcecea75_5365	c4610aa9a2d5bacd833356b3605d9b21_5362	f0f6386fb62ec3a09e34ad652cf53efb_4234	S_aureus_10_01286
WP_000860590.1		FAD-containing oxidoreductase	4	4	1	1	2192				1322	1322	1322	0c5d6aed1d23427ac77815eabcecea75_1183	c4610aa9a2d5bacd833356b3605d9b21_1177	f0f6386fb62ec3a09e34ad652cf53efb_2800	S_aureus_10_00697
guaC		GMP reductase	4	4	1	1	2026				977	977	977	0c5d6aed1d23427ac77815eabcecea75_2545	c4610aa9a2d5bacd833356b3605d9b21_2538	f0f6386fb62ec3a09e34ad652cf53efb_1434	S_aureus_10_00050
ftsZ		cell division protein FtsZ	4	4	1	1	2693				1172	1172	1172	0c5d6aed1d23427ac77815eabcecea75_2221	c4610aa9a2d5bacd833356b3605d9b21_2210	f0f6386fb62ec3a09e34ad652cf53efb_1760	S_aureus_10_00209
bshC		bacillithiol biosynthesis cysteine-adding enzyme BshC	4	4	1	1	2684				1613	1613	1613	0c5d6aed1d23427ac77815eabcecea75_2203	c4610aa9a2d5bacd833356b3605d9b21_2192	f0f6386fb62ec3a09e34ad652cf53efb_1778	S_aureus_10_00218
arcC		carbamate kinase	4	4	1	1	498				941	941	941	0c5d6aed1d23427ac77815eabcecea75_5485	c4610aa9a2d5bacd833356b3605d9b21_5482	f0f6386fb62ec3a09e34ad652cf53efb_4114	S_aureus_10_01233
rpmA		50S ribosomal protein L27	4	4	1	1	1238				284	284	284	0c5d6aed1d23427ac77815eabcecea75_3180	c4610aa9a2d5bacd833356b3605d9b21_3174	f0f6386fb62ec3a09e34ad652cf53efb_797	S_aureus_10_01736
pyrR		bifunctional pyr operon transcriptional regulator/uracil phosphoribosyltransferase PyrR	4	4	1	1	2704				527	527	527	0c5d6aed1d23427ac77815eabcecea75_2245	c4610aa9a2d5bacd833356b3605d9b21_2234	f0f6386fb62ec3a09e34ad652cf53efb_1736	S_aureus_10_00197
WP_001129473.1		hypothetical protein	4	4	1	1	118				269	269	269	0c5d6aed1d23427ac77815eabcecea75_855	c4610aa9a2d5bacd833356b3605d9b21_849	f0f6386fb62ec3a09e34ad652cf53efb_3128	S_aureus_10_02507
WP_000766009.1		DoxX family protein	4	4	1	1	2542				356	356	356	0c5d6aed1d23427ac77815eabcecea75_1909	c4610aa9a2d5bacd833356b3605d9b21_1896	f0f6386fb62ec3a09e34ad652cf53efb_2076	S_aureus_10_00355
WP_000681968.1		hypothetical protein	4	4	1	1	1047				176	176	176	0c5d6aed1d23427ac77815eabcecea75_4031	c4610aa9a2d5bacd833356b3605d9b21_4032	f0f6386fb62ec3a09e34ad652cf53efb_73	S_aureus_10_02137
qoxB		cytochrome aa3 quinol oxidase subunit I	4	4	1	1	2566				1988	1988	1988	0c5d6aed1d23427ac77815eabcecea75_1959	c4610aa9a2d5bacd833356b3605d9b21_1946	f0f6386fb62ec3a09e34ad652cf53efb_2026	S_aureus_10_00332
WP_000347061.1		MFS transporter	4	4	1	1	2173				1400	1400	1400	0c5d6aed1d23427ac77815eabcecea75_1143	c4610aa9a2d5bacd833356b3605d9b21_1137	f0f6386fb62ec3a09e34ad652cf53efb_2840	S_aureus_10_00717
WP_000828354.1		hypothetical protein	4	4	1	1	1711				137	137	137	0c5d6aed1d23427ac77815eabcecea75_4330	c4610aa9a2d5bacd833356b3605d9b21_4329	f0f6386fb62ec3a09e34ad652cf53efb_5271	S_aureus_10_02255
ligA		NAD-dependent DNA ligase LigA	4	4	1	1	1473				2003	2003	2003	0c5d6aed1d23427ac77815eabcecea75_3963	c4610aa9a2d5bacd833356b3605d9b21_3962	f0f6386fb62ec3a09e34ad652cf53efb_141	S_aureus_10_02106
WP_000290301.1		YlbF/YmcA family competence regulator	4	4	1	1	1533				344	344	344	0c5d6aed1d23427ac77815eabcecea75_3746	c4610aa9a2d5bacd833356b3605d9b21_3745	f0f6386fb62ec3a09e34ad652cf53efb_361	S_aureus_10_02443
WP_000521533.1		ABC transporter permease	4	4	1	1	2491				926	926	926	0c5d6aed1d23427ac77815eabcecea75_1800	c4610aa9a2d5bacd833356b3605d9b21_1788	f0f6386fb62ec3a09e34ad652cf53efb_2185	S_aureus_10_00404
WP_001030125.1		YafY family transcriptional regulator	4	4	1	1	1926				692	692	692	0c5d6aed1d23427ac77815eabcecea75_4802	c4610aa9a2d5bacd833356b3605d9b21_4797	f0f6386fb62ec3a09e34ad652cf53efb_4795	S_aureus_10_01903
tmk		dTMP kinase	4	4	1	1	100				617	617	617	0c5d6aed1d23427ac77815eabcecea75_906	c4610aa9a2d5bacd833356b3605d9b21_900	f0f6386fb62ec3a09e34ad652cf53efb_3077	S_aureus_10_02577
WP_000801007.1		YozE family protein	4	4	1	1	816				221	221	221	0c5d6aed1d23427ac77815eabcecea75_2726	c4610aa9a2d5bacd833356b3605d9b21_2718	f0f6386fb62ec3a09e34ad652cf53efb_1255	S_aureus_10_01517
WP_045178200.1		hypothetical protein	4	4	1	1	465				416	416	416	0c5d6aed1d23427ac77815eabcecea75_5413	c4610aa9a2d5bacd833356b3605d9b21_5410	f0f6386fb62ec3a09e34ad652cf53efb_4186	S_aureus_10_01262
WP_000998557.1		hypothetical protein	4	4	1	1	2711				212	212	212	0c5d6aed1d23427ac77815eabcecea75_2261	c4610aa9a2d5bacd833356b3605d9b21_2248	f0f6386fb62ec3a09e34ad652cf53efb_1720	S_aureus_10_00189
WP_000140679.1		F0F1 ATP synthase subunit B	4	4	1	1	1732				521	521	521	0c5d6aed1d23427ac77815eabcecea75_4375	c4610aa9a2d5bacd833356b3605d9b21_4374	f0f6386fb62ec3a09e34ad652cf53efb_5226	S_aureus_10_02234
WP_000536959.1		ABC transporter permease	4	4	1	1	877				770	770	770	0c5d6aed1d23427ac77815eabcecea75_5233	c4610aa9a2d5bacd833356b3605d9b21_5230	f0f6386fb62ec3a09e34ad652cf53efb_4366	S_aureus_10_01349
WP_000814112.1		proline--tRNA ligase	4	4	1	1	2109				1703	1703	1703	0c5d6aed1d23427ac77815eabcecea75_2379	c4610aa9a2d5bacd833356b3605d9b21_2366	f0f6386fb62ec3a09e34ad652cf53efb_1602	S_aureus_10_00132
WP_000428172.1		YtxH domain-containing protein	4	4	1	1	1497				275	275	275	0c5d6aed1d23427ac77815eabcecea75_3913	c4610aa9a2d5bacd833356b3605d9b21_3912	f0f6386fb62ec3a09e34ad652cf53efb_191	S_aureus_10_02084
deoC		deoxyribose-phosphate aldolase	4	4	1	1	1762				662	662	662	0c5d6aed1d23427ac77815eabcecea75_4435	c4610aa9a2d5bacd833356b3605d9b21_4434	f0f6386fb62ec3a09e34ad652cf53efb_5166	S_aureus_10_02204
hslU		ATP-dependent protease ATPase subunit HslU	4	4	1	1	2120				1403	1403	1403	0c5d6aed1d23427ac77815eabcecea75_2357	c4610aa9a2d5bacd833356b3605d9b21_2344	f0f6386fb62ec3a09e34ad652cf53efb_1624	S_aureus_10_00141
rplV		50S ribosomal protein L22	4	4	1	1	1857				353	353	353	0c5d6aed1d23427ac77815eabcecea75_4664	c4610aa9a2d5bacd833356b3605d9b21_4659	f0f6386fb62ec3a09e34ad652cf53efb_4933	S_aureus_10_01838
WP_000599589.1		PH domain-containing protein	4	4	1	1	1908				326	326	326	0c5d6aed1d23427ac77815eabcecea75_4768	c4610aa9a2d5bacd833356b3605d9b21_4763	f0f6386fb62ec3a09e34ad652cf53efb_4829	S_aureus_10_01887
WP_001047066.1		LysR family transcriptional regulator	4	4	1	1	2481				869	869	869	0c5d6aed1d23427ac77815eabcecea75_1780	c4610aa9a2d5bacd833356b3605d9b21_1768	f0f6386fb62ec3a09e34ad652cf53efb_2205	S_aureus_10_00414
WP_000403916.1		LysR family transcriptional regulator	4	4	1	1	113				884	884	884	0c5d6aed1d23427ac77815eabcecea75_865	c4610aa9a2d5bacd833356b3605d9b21_859	f0f6386fb62ec3a09e34ad652cf53efb_3118	S_aureus_10_02502
WP_045178252.1		DUF5079 family protein	4	4	1	1	371				647	647	647	0c5d6aed1d23427ac77815eabcecea75_513	c4610aa9a2d5bacd833356b3605d9b21_509	f0f6386fb62ec3a09e34ad652cf53efb_3474	S_aureus_10_00908
WP_000538767.1		DUF420 domain-containing protein	4	4	1	1	2625				461	461	461	0c5d6aed1d23427ac77815eabcecea75_2076	c4610aa9a2d5bacd833356b3605d9b21_2065	f0f6386fb62ec3a09e34ad652cf53efb_1909	S_aureus_10_00276
WP_001253310.1		carbohydrate kinase	4	4	1	1	1663				959	959	959	0c5d6aed1d23427ac77815eabcecea75_4219	c4610aa9a2d5bacd833356b3605d9b21_4218	f0f6386fb62ec3a09e34ad652cf53efb_5382	S_aureus_10_02322
WP_000366163.1		NERD domain-containing protein	4	4	1	1	1376				908	908	908	0c5d6aed1d23427ac77815eabcecea75_3467	c4610aa9a2d5bacd833356b3605d9b21_3460	f0f6386fb62ec3a09e34ad652cf53efb_510	S_aureus_10_02042
WP_001223008.1		MBL fold metallo-hydrolase	4	4	1	1	1142				623	623	623	0c5d6aed1d23427ac77815eabcecea75_2981	c4610aa9a2d5bacd833356b3605d9b21_2975	f0f6386fb62ec3a09e34ad652cf53efb_996	S_aureus_10_01639
msaC		sarA expression modulator MsaC	4	4	1	1	842				401	401	401	0c5d6aed1d23427ac77815eabcecea75_2678	c4610aa9a2d5bacd833356b3605d9b21_2670	f0f6386fb62ec3a09e34ad652cf53efb_1303	S_aureus_10_02608
WP_000902121.1		ATP-dependent DNA helicase	4	4	1	1	257				1379	1379	1379	0c5d6aed1d23427ac77815eabcecea75_2851	c4610aa9a2d5bacd833356b3605d9b21_2845	f0f6386fb62ec3a09e34ad652cf53efb_1130	S_aureus_10_01576
WP_000181131.1		YceI family protein	4	4	1	1	553				515	515	515	0c5d6aed1d23427ac77815eabcecea75_5595	c4610aa9a2d5bacd833356b3605d9b21_5594	f0f6386fb62ec3a09e34ad652cf53efb_4004	S_aureus_10_01179
WP_001793589.1		DEAD/DEAH box helicase	4	4	1	1	2347				1082	1082	1082	0c5d6aed1d23427ac77815eabcecea75_1507	c4610aa9a2d5bacd833356b3605d9b21_1495	f0f6386fb62ec3a09e34ad652cf53efb_2476	S_aureus_10_00544
cap8K		type 8 capsular polysaccharide synthesis protein Cap8K	4	4	1	1	704				1238	1238	1238	0c5d6aed1d23427ac77815eabcecea75_271	c4610aa9a2d5bacd833356b3605d9b21_267	f0f6386fb62ec3a09e34ad652cf53efb_3722	S_aureus_10_01023
WP_000207845.1		GAF domain-containing protein	4	4	1	1	1305				464	464	464	0c5d6aed1d23427ac77815eabcecea75_3324	c4610aa9a2d5bacd833356b3605d9b21_3317	f0f6386fb62ec3a09e34ad652cf53efb_653	S_aureus_10_01977
WP_001062177.1		DEAD/DEAH box helicase	4	4	1	1	1155				1346	1346	1346	0c5d6aed1d23427ac77815eabcecea75_3007	c4610aa9a2d5bacd833356b3605d9b21_3001	f0f6386fb62ec3a09e34ad652cf53efb_970	S_aureus_10_01651
WP_000404645.1		virulence factor	4	4	1	1	16				1124	1124	1124	0c5d6aed1d23427ac77815eabcecea75_2742	c4610aa9a2d5bacd833356b3605d9b21_2734	f0f6386fb62ec3a09e34ad652cf53efb_1239	S_aureus_10_01525
ybaK		Cys-tRNA(Pro) deacylase	4	4	1	1	2294				482	482	482	0c5d6aed1d23427ac77815eabcecea75_1395	c4610aa9a2d5bacd833356b3605d9b21_1385	f0f6386fb62ec3a09e34ad652cf53efb_2588	S_aureus_10_00596
essA		type VII secretion protein EssA	4	4	1	1	366				458	458	458	0c5d6aed1d23427ac77815eabcecea75_523	c4610aa9a2d5bacd833356b3605d9b21_519	f0f6386fb62ec3a09e34ad652cf53efb_3464	S_aureus_10_00903
WP_000055859.1		DUF2316 family protein	4	4	1	1	439				299	299	299	0c5d6aed1d23427ac77815eabcecea75_5361	c4610aa9a2d5bacd833356b3605d9b21_5358	f0f6386fb62ec3a09e34ad652cf53efb_4238	S_aureus_10_01288
WP_000857176.1		site-specific integrase	4	4	1	1	1644				1037	1037	1037	0c5d6aed1d23427ac77815eabcecea75_4179	c4610aa9a2d5bacd833356b3605d9b21_4178	f0f6386fb62ec3a09e34ad652cf53efb_5422	S_aureus_10_02303
sfaD		D-ornithine--citrate ligase SfaD	4	4	1	1	1802				1976	1976	1976	0c5d6aed1d23427ac77815eabcecea75_4548	c4610aa9a2d5bacd833356b3605d9b21_4547	f0f6386fb62ec3a09e34ad652cf53efb_5049	S_aureus_10_01785
rpsK		30S ribosomal protein S11	4	4	1	1	1837				389	389	389	0c5d6aed1d23427ac77815eabcecea75_4624	c4610aa9a2d5bacd833356b3605d9b21_4619	f0f6386fb62ec3a09e34ad652cf53efb_4973	S_aureus_10_01818
WP_001044231.1		acetyltransferase	4	4	1	1	2479				1814	1814	1814	0c5d6aed1d23427ac77815eabcecea75_1776	c4610aa9a2d5bacd833356b3605d9b21_1764	f0f6386fb62ec3a09e34ad652cf53efb_2209	S_aureus_10_00416
WP_000192949.1		YigZ family protein	4	4	1	1	2345				641	641	641	0c5d6aed1d23427ac77815eabcecea75_1503	c4610aa9a2d5bacd833356b3605d9b21_1491	f0f6386fb62ec3a09e34ad652cf53efb_2480	S_aureus_10_00546
WP_000284433.1		nicotinate phosphoribosyltransferase	4	4	1	1	1463				1469	1469	1469	0c5d6aed1d23427ac77815eabcecea75_3983	c4610aa9a2d5bacd833356b3605d9b21_3982	f0f6386fb62ec3a09e34ad652cf53efb_121	S_aureus_10_02116
vraF		ABC transporter ATP-binding protein VraF	4	4	1	1	2258				761	761	761	0c5d6aed1d23427ac77815eabcecea75_1321	c4610aa9a2d5bacd833356b3605d9b21_1311	f0f6386fb62ec3a09e34ad652cf53efb_2662	S_aureus_10_00632
WP_000691303.1		exonuclease SbcCD subunit D	4	4	1	1	2017				1121	1121	1121	0c5d6aed1d23427ac77815eabcecea75_2565	c4610aa9a2d5bacd833356b3605d9b21_2558	f0f6386fb62ec3a09e34ad652cf53efb_1414	S_aureus_10_00042
WP_045176849.1		DUF445 domain-containing protein	4	4	1	1	1532				1124	1124	1124	0c5d6aed1d23427ac77815eabcecea75_3748	c4610aa9a2d5bacd833356b3605d9b21_3747	f0f6386fb62ec3a09e34ad652cf53efb_359	S_aureus_10_02442
WP_000755946.1		(deoxy)nucleoside triphosphate pyrophosphohydrolase	4	4	1	1	901				392	392	392	0c5d6aed1d23427ac77815eabcecea75_5183	c4610aa9a2d5bacd833356b3605d9b21_5178	f0f6386fb62ec3a09e34ad652cf53efb_4416	S_aureus_10_01372
WP_000381267.1		MFS transporter	4	4	1	1	949				1400	1400	1400	0c5d6aed1d23427ac77815eabcecea75_5083	c4610aa9a2d5bacd833356b3605d9b21_5078	f0f6386fb62ec3a09e34ad652cf53efb_4514	S_aureus_10_01418
WP_001178942.1		DEAD/DEAH box helicase	4	4	1	1	1707				1520	1520	1520	0c5d6aed1d23427ac77815eabcecea75_4322	c4610aa9a2d5bacd833356b3605d9b21_4321	f0f6386fb62ec3a09e34ad652cf53efb_5279	S_aureus_10_02259
WP_000706137.1		NAD-dependent formate dehydrogenase	4	4	1	1	721				1025	1175	1062	0c5d6aed1d23427ac77815eabcecea75_305	c4610aa9a2d5bacd833356b3605d9b21_301	f0f6386fb62ec3a09e34ad652cf53efb_3688	S_aureus_10_01006
WP_001165363.1		hypothetical protein	4	4	1	1	1470				302	302	302	0c5d6aed1d23427ac77815eabcecea75_3969	c4610aa9a2d5bacd833356b3605d9b21_3968	f0f6386fb62ec3a09e34ad652cf53efb_135	S_aureus_10_02109
graS		histidine kinase GraS/ApsS	4	4	1	1	2257				1040	1040	1040	0c5d6aed1d23427ac77815eabcecea75_1319	c4610aa9a2d5bacd833356b3605d9b21_1309	f0f6386fb62ec3a09e34ad652cf53efb_2664	S_aureus_10_00633
WP_000805950.1		uroporphyrinogen-III synthase	4	4	1	1	1255				668	668	668	0c5d6aed1d23427ac77815eabcecea75_3218	c4610aa9a2d5bacd833356b3605d9b21_3212	f0f6386fb62ec3a09e34ad652cf53efb_759	S_aureus_10_01751
WP_045176861.1		HIT family protein	4	4	1	1	1541				422	422	422	0c5d6aed1d23427ac77815eabcecea75_3730	c4610aa9a2d5bacd833356b3605d9b21_3729	f0f6386fb62ec3a09e34ad652cf53efb_377	S_aureus_10_02450
efeB		iron uptake transporter deferrochelatase/peroxidase subunit	4	4	1	1	221				1229	1229	1229	0c5d6aed1d23427ac77815eabcecea75_647	c4610aa9a2d5bacd833356b3605d9b21_641	f0f6386fb62ec3a09e34ad652cf53efb_3336	S_aureus_10_00843
modB		molybdate ABC transporter permease subunit	4	4	1	1	1891				671	671	671	0c5d6aed1d23427ac77815eabcecea75_4734	c4610aa9a2d5bacd833356b3605d9b21_4729	f0f6386fb62ec3a09e34ad652cf53efb_4863	S_aureus_10_01870
lexA		transcriptional repressor LexA	4	4	1	1	2024				623	623	623	0c5d6aed1d23427ac77815eabcecea75_2551	c4610aa9a2d5bacd833356b3605d9b21_2544	f0f6386fb62ec3a09e34ad652cf53efb_1428	S_aureus_10_00048
mnhA2		Na+/H+ antiporter Mnh2 subunit A	4	4	1	1	2222				2402	2402	2402	0c5d6aed1d23427ac77815eabcecea75_1245	c4610aa9a2d5bacd833356b3605d9b21_1239	f0f6386fb62ec3a09e34ad652cf53efb_2738	S_aureus_10_00669
WP_001055897.1		helix-turn-helix domain-containing protein	4	4	1	1	191				263	263	263	0c5d6aed1d23427ac77815eabcecea75_706	c4610aa9a2d5bacd833356b3605d9b21_702	f0f6386fb62ec3a09e34ad652cf53efb_3277	S_aureus_10_00815
hutG		formimidoylglutamase	4	4	1	1	1947				935	935	935	0c5d6aed1d23427ac77815eabcecea75_4849	c4610aa9a2d5bacd833356b3605d9b21_4844	f0f6386fb62ec3a09e34ad652cf53efb_4748	S_aureus_10_01924
WP_001177828.1		prephenate dehydratase	4	4	1	1	1461				794	794	794	0c5d6aed1d23427ac77815eabcecea75_3987	c4610aa9a2d5bacd833356b3605d9b21_3986	f0f6386fb62ec3a09e34ad652cf53efb_117	S_aureus_10_02118
WP_000169317.1		GNAT family N-acetyltransferase	4	4	1	1	993				536	536	536	0c5d6aed1d23427ac77815eabcecea75_4989	c4610aa9a2d5bacd833356b3605d9b21_4986	f0f6386fb62ec3a09e34ad652cf53efb_4608	S_aureus_10_01460
WP_000047255.1		hemolysin III family protein	4	4	1	1	1789				683	686	683	0c5d6aed1d23427ac77815eabcecea75_4524	c4610aa9a2d5bacd833356b3605d9b21_4521	f0f6386fb62ec3a09e34ad652cf53efb_5077	S_aureus_10_01773
WP_001171351.1		aldo/keto reductase	4	4	1	1	236				908	908	908	0c5d6aed1d23427ac77815eabcecea75_2888	c4610aa9a2d5bacd833356b3605d9b21_2882	f0f6386fb62ec3a09e34ad652cf53efb_1089	S_aureus_10_01595
WP_000152583.1		DUF456 domain-containing protein	4	4	1	1	2271				488	488	488	0c5d6aed1d23427ac77815eabcecea75_1349	c4610aa9a2d5bacd833356b3605d9b21_1339	f0f6386fb62ec3a09e34ad652cf53efb_2634	S_aureus_10_00619
WP_001820550.1		DNA polymerase III subunit alpha	4	4	1	1	2108				4310	4316	4311	0c5d6aed1d23427ac77815eabcecea75_2381	c4610aa9a2d5bacd833356b3605d9b21_2368	f0f6386fb62ec3a09e34ad652cf53efb_1600	S_aureus_10_00131
WP_000181832.1		MurR/RpiR family transcriptional regulator	4	4	1	1	738				875	878	875	0c5d6aed1d23427ac77815eabcecea75_339	c4610aa9a2d5bacd833356b3605d9b21_335	f0f6386fb62ec3a09e34ad652cf53efb_3654	S_aureus_10_00990
WP_001240316.1		inositol monophosphatase family protein	4	4	1	1	2615				827	827	827	0c5d6aed1d23427ac77815eabcecea75_2056	c4610aa9a2d5bacd833356b3605d9b21_2045	f0f6386fb62ec3a09e34ad652cf53efb_1929	S_aureus_10_00285
WP_001237506.1		MFS transporter	4	4	1	1	1788				1343	1343	1343	0c5d6aed1d23427ac77815eabcecea75_4522	c4610aa9a2d5bacd833356b3605d9b21_4519	f0f6386fb62ec3a09e34ad652cf53efb_5079	S_aureus_10_01772
WP_000848779.1		ABC transporter permease	4	4	1	1	374				1166	1166	1166	0c5d6aed1d23427ac77815eabcecea75_507	c4610aa9a2d5bacd833356b3605d9b21_503	f0f6386fb62ec3a09e34ad652cf53efb_3480	S_aureus_10_00911
WP_045177514.1		BglG family transcription antiterminator	4	4	1	1	316				1955	1955	1955	0c5d6aed1d23427ac77815eabcecea75_623	c4610aa9a2d5bacd833356b3605d9b21_617	f0f6386fb62ec3a09e34ad652cf53efb_3360	S_aureus_10_00855
QNV78189.1		MBL fold metallo-hydrolase	4	4	1	1	1338				842	842	842	0c5d6aed1d23427ac77815eabcecea75_3390	c4610aa9a2d5bacd833356b3605d9b21_3383	f0f6386fb62ec3a09e34ad652cf53efb_587	S_aureus_10_02005
sasC		LPXTG-anchored repetitive surface protein SasC	4	4	1	1	1347				6560	6560	6560	0c5d6aed1d23427ac77815eabcecea75_3408	c4610aa9a2d5bacd833356b3605d9b21_3401	f0f6386fb62ec3a09e34ad652cf53efb_569	S_aureus_10_02014
kdpA		potassium-transporting ATPase subunit KdpA	4	4	1	1	1703				1676	1676	1676	0c5d6aed1d23427ac77815eabcecea75_4314	c4610aa9a2d5bacd833356b3605d9b21_4313	f0f6386fb62ec3a09e34ad652cf53efb_5287	S_aureus_10_02262
WP_072353916.1		PH domain-containing protein	4	4	1	1	1698				491	494	491	0c5d6aed1d23427ac77815eabcecea75_4304	c4610aa9a2d5bacd833356b3605d9b21_4303	f0f6386fb62ec3a09e34ad652cf53efb_5297	S_aureus_10_02267
WP_001181356.1		methyltransferase domain-containing protein	4	4	1	1	639				731	737	732	0c5d6aed1d23427ac77815eabcecea75_137	c4610aa9a2d5bacd833356b3605d9b21_135	f0f6386fb62ec3a09e34ad652cf53efb_3856	S_aureus_10_01088
WP_001803661.1		acyl CoA:acetate/3-ketoacid CoA transferase	4	4	1	1	773				1562	1577	1573	0c5d6aed1d23427ac77815eabcecea75_411	c4610aa9a2d5bacd833356b3605d9b21_407	f0f6386fb62ec3a09e34ad652cf53efb_3576	S_aureus_10_00955
sbnG		staphyloferrin B biosynthesis citrate synthase SbnG	4	4	1	1	667				776	779	776	0c5d6aed1d23427ac77815eabcecea75_195	c4610aa9a2d5bacd833356b3605d9b21_193	f0f6386fb62ec3a09e34ad652cf53efb_3798	S_aureus_10_01060
hssR		DNA-binding heme response regulator HssR	4	4	1	1	1033				674	674	674	0c5d6aed1d23427ac77815eabcecea75_4909	c4610aa9a2d5bacd833356b3605d9b21_4906	f0f6386fb62ec3a09e34ad652cf53efb_4688	S_aureus_10_01499
WP_045178170.1		methylated-DNA--[protein]-cysteine S-methyltransferase	4	4	1	1	410				521	521	521	0c5d6aed1d23427ac77815eabcecea75_5301	c4610aa9a2d5bacd833356b3605d9b21_5298	f0f6386fb62ec3a09e34ad652cf53efb_4298	S_aureus_10_01316
pheS		phenylalanine--tRNA ligase subunit alpha	4	4	1	1	2646				1058	1058	1058	0c5d6aed1d23427ac77815eabcecea75_2118	c4610aa9a2d5bacd833356b3605d9b21_2107	f0f6386fb62ec3a09e34ad652cf53efb_1867	S_aureus_10_00256
WP_000178003.1		AbrB family transcriptional regulator	4	4	1	1	1252				1067	1073	1071	0c5d6aed1d23427ac77815eabcecea75_3210	c4610aa9a2d5bacd833356b3605d9b21_3204	f0f6386fb62ec3a09e34ad652cf53efb_767	S_aureus_10_01748
WP_086095210.1		NAD-dependent epimerase/dehydratase family protein	4	4	1	1	26				965	965	965	0c5d6aed1d23427ac77815eabcecea75_1103	c4610aa9a2d5bacd833356b3605d9b21_1097	f0f6386fb62ec3a09e34ad652cf53efb_2880	S_aureus_10_00738
WP_000571247.1		dipeptide/oligopeptide/nickel ABC transporter ATP-binding protein	4	4	1	1	1985				701	701	701	0c5d6aed1d23427ac77815eabcecea75_2629	c4610aa9a2d5bacd833356b3605d9b21_2622	f0f6386fb62ec3a09e34ad652cf53efb_1350	S_aureus_10_00011
WP_072384901.1		ABC transporter ATP-binding protein	4	4	1	1	2044				899	908	905	0c5d6aed1d23427ac77815eabcecea75_2507	c4610aa9a2d5bacd833356b3605d9b21_2500	f0f6386fb62ec3a09e34ad652cf53efb_1472	S_aureus_10_00068
WP_176325160.1		sensor histidine kinase	4	4	1	1	798				1739	1754	1750	0c5d6aed1d23427ac77815eabcecea75_465	c4610aa9a2d5bacd833356b3605d9b21_461	f0f6386fb62ec3a09e34ad652cf53efb_3522	S_aureus_10_00930
acsA		acetate--CoA ligase	4	4	1	1	1322				1706	1706	1706	0c5d6aed1d23427ac77815eabcecea75_3358	c4610aa9a2d5bacd833356b3605d9b21_3351	f0f6386fb62ec3a09e34ad652cf53efb_619	S_aureus_10_01991
QNV77512.1		osmotic stress response protein	4	4	1	1	2561				470	470	470	0c5d6aed1d23427ac77815eabcecea75_1949	c4610aa9a2d5bacd833356b3605d9b21_1936	f0f6386fb62ec3a09e34ad652cf53efb_2036	S_aureus_10_00337
cap8I		type 8 capsular polysaccharide synthesis protein Cap8I	4	4	1	1	702				1394	1394	1394	0c5d6aed1d23427ac77815eabcecea75_267	c4610aa9a2d5bacd833356b3605d9b21_263	f0f6386fb62ec3a09e34ad652cf53efb_3726	S_aureus_10_01025
qoxA		cytochrome aa3 quinol oxidase subunit II	4	4	1	1	2567				1100	1100	1100	0c5d6aed1d23427ac77815eabcecea75_1961	c4610aa9a2d5bacd833356b3605d9b21_1948	f0f6386fb62ec3a09e34ad652cf53efb_2024	S_aureus_10_00331
metE		5-methyltetrahydropteroyltriglutamate--homocysteine S-methyltransferase	4	4	1	1	209				2228	2228	2228	0c5d6aed1d23427ac77815eabcecea75_671	c4610aa9a2d5bacd833356b3605d9b21_665	f0f6386fb62ec3a09e34ad652cf53efb_3312	S_aureus_10_00831
recF		DNA replication/repair protein RecF	4	4	1	1	582				1112	1112	1112	0c5d6aed1d23427ac77815eabcecea75_9	c4610aa9a2d5bacd833356b3605d9b21_9	f0f6386fb62ec3a09e34ad652cf53efb_3948	S_aureus_10_01150
WP_001018962.1		toprim domain-containing protein	4	4	1	1	2412				386	389	386	0c5d6aed1d23427ac77815eabcecea75_1639	c4610aa9a2d5bacd833356b3605d9b21_1627	f0f6386fb62ec3a09e34ad652cf53efb_2346	S_aureus_10_00482
WP_001788788.1		5-bromo-4-chloroindolyl phosphate hydrolysis family protein	4	4	1	1	846				623	629	627	0c5d6aed1d23427ac77815eabcecea75_2686	c4610aa9a2d5bacd833356b3605d9b21_2678	f0f6386fb62ec3a09e34ad652cf53efb_1295	S_aureus_10_02604
WP_000342146.1		S41 family peptidase	4	4	1	1	817				1490	1490	1490	0c5d6aed1d23427ac77815eabcecea75_2724	c4610aa9a2d5bacd833356b3605d9b21_2716	f0f6386fb62ec3a09e34ad652cf53efb_1257	S_aureus_10_01516
WP_000525110.1		ABC-F family ATP-binding cassette domain-containing protein	4	4	1	1	2317				1877	1883	1881	0c5d6aed1d23427ac77815eabcecea75_1441	c4610aa9a2d5bacd833356b3605d9b21_1431	f0f6386fb62ec3a09e34ad652cf53efb_2542	S_aureus_10_00574
atpH		F0F1 ATP synthase subunit delta	4	4	1	1	1731				539	539	539	0c5d6aed1d23427ac77815eabcecea75_4373	c4610aa9a2d5bacd833356b3605d9b21_4372	f0f6386fb62ec3a09e34ad652cf53efb_5228	S_aureus_10_02235
WP_000804320.1		2-oxoacid:acceptor oxidoreductase subunit alpha	4	4	1	1	2083				1760	1760	1760	0c5d6aed1d23427ac77815eabcecea75_2431	c4610aa9a2d5bacd833356b3605d9b21_2418	f0f6386fb62ec3a09e34ad652cf53efb_1550	S_aureus_10_00106
WP_000659317.1		XTP/dITP diphosphatase	4	4	1	1	2660				587	587	587	0c5d6aed1d23427ac77815eabcecea75_2146	c4610aa9a2d5bacd833356b3605d9b21_2135	f0f6386fb62ec3a09e34ad652cf53efb_1839	S_aureus_10_00243
fmtA		teichoic acid D-Ala esterase FmtA	4	4	1	1	2563				1190	1193	1192	0c5d6aed1d23427ac77815eabcecea75_1953	c4610aa9a2d5bacd833356b3605d9b21_1940	f0f6386fb62ec3a09e34ad652cf53efb_2032	S_aureus_10_00335
leuS		leucine--tRNA ligase	4	4	1	1	1349				2420	2423	2422	0c5d6aed1d23427ac77815eabcecea75_3412	c4610aa9a2d5bacd833356b3605d9b21_3405	f0f6386fb62ec3a09e34ad652cf53efb_565	S_aureus_10_02016
WP_000895191.1		ferrous iron transporter B	4	4	1	1	445				1340	1346	1341	0c5d6aed1d23427ac77815eabcecea75_5373	c4610aa9a2d5bacd833356b3605d9b21_5370	f0f6386fb62ec3a09e34ad652cf53efb_4226	S_aureus_10_01282
WP_045178317.1		type I restriction endonuclease subunit R	4	4	1	1	740				2789	2789	2789	0c5d6aed1d23427ac77815eabcecea75_343	c4610aa9a2d5bacd833356b3605d9b21_339	f0f6386fb62ec3a09e34ad652cf53efb_3650	S_aureus_10_00988
WP_001060928.1		aldehyde reductase	4	4	1	1	320				1025	1025	1025	0c5d6aed1d23427ac77815eabcecea75_615	c4610aa9a2d5bacd833356b3605d9b21_609	f0f6386fb62ec3a09e34ad652cf53efb_3368	S_aureus_10_00859
alaS		alanine--tRNA ligase	4	4	1	1	1212				2630	2633	2630	0c5d6aed1d23427ac77815eabcecea75_3123	c4610aa9a2d5bacd833356b3605d9b21_3117	f0f6386fb62ec3a09e34ad652cf53efb_854	S_aureus_10_01710
WP_086095147.1		FUSC family protein	4	4	1	1	882				1823	1823	1823	0c5d6aed1d23427ac77815eabcecea75_5221	c4610aa9a2d5bacd833356b3605d9b21_5218	f0f6386fb62ec3a09e34ad652cf53efb_4378	S_aureus_10_01354
QNV78730.1		MFS transporter	4	4	1	1	1878				1211	1211	1211	0c5d6aed1d23427ac77815eabcecea75_4708	c4610aa9a2d5bacd833356b3605d9b21_4703	f0f6386fb62ec3a09e34ad652cf53efb_4889	S_aureus_10_01858
QNV78015.1		Nif3-like dinuclear metal center hexameric protein	4	4	1	1	1156				1100	1100	1100	0c5d6aed1d23427ac77815eabcecea75_3009	c4610aa9a2d5bacd833356b3605d9b21_3003	f0f6386fb62ec3a09e34ad652cf53efb_968	S_aureus_10_01652
WP_000769720.1		PepSY domain-containing protein	4	4	1	1	192				572	572	572	0c5d6aed1d23427ac77815eabcecea75_704	c4610aa9a2d5bacd833356b3605d9b21_700	f0f6386fb62ec3a09e34ad652cf53efb_3279	S_aureus_10_00816
nagB_2		glucosamine-6-phosphate isomerase	4	4	1	1	1524				599	599	599	0c5d6aed1d23427ac77815eabcecea75_3764	c4610aa9a2d5bacd833356b3605d9b21_3763	f0f6386fb62ec3a09e34ad652cf53efb_343	S_aureus_10_02434
WP_000974460.1		organic hydroperoxide resistance protein	4	4	1	1	2404				422	422	422	0c5d6aed1d23427ac77815eabcecea75_1625	c4610aa9a2d5bacd833356b3605d9b21_1611	f0f6386fb62ec3a09e34ad652cf53efb_2360	S_aureus_10_00490
WP_015445861.1		ATP-binding protein	4	4	1	1	1279				1661	1664	1661	0c5d6aed1d23427ac77815eabcecea75_3270	c4610aa9a2d5bacd833356b3605d9b21_3263	f0f6386fb62ec3a09e34ad652cf53efb_707	S_aureus_10_01952
WP_164067126.1		hypothetical protein	4	4	1	1	2263				644	644	644	0c5d6aed1d23427ac77815eabcecea75_1331	c4610aa9a2d5bacd833356b3605d9b21_1321	f0f6386fb62ec3a09e34ad652cf53efb_2652	S_aureus_10_00627
WP_001789408.1		NAD-dependent epimerase/dehydratase family protein	4	4	1	1	673				971	980	977	0c5d6aed1d23427ac77815eabcecea75_207	c4610aa9a2d5bacd833356b3605d9b21_205	f0f6386fb62ec3a09e34ad652cf53efb_3786	S_aureus_10_01055
WP_240017441.1		TIGR00282 family metallophosphoesterase	4	4	1	1	2084				797	797	797	0c5d6aed1d23427ac77815eabcecea75_2429	c4610aa9a2d5bacd833356b3605d9b21_2416	f0f6386fb62ec3a09e34ad652cf53efb_1552	S_aureus_10_00107
WP_000076927.1		ThiF family adenylyltransferase	4	4	1	1	1889				1004	1004	1004	0c5d6aed1d23427ac77815eabcecea75_4730	c4610aa9a2d5bacd833356b3605d9b21_4725	f0f6386fb62ec3a09e34ad652cf53efb_4867	S_aureus_10_01868
nhaC		Na+/H+ antiporter NhaC	4	4	1	1	1913				1397	1400	1399	0c5d6aed1d23427ac77815eabcecea75_4778	c4610aa9a2d5bacd833356b3605d9b21_4773	f0f6386fb62ec3a09e34ad652cf53efb_4819	S_aureus_10_01891
WP_025920701.1		dUTP diphosphatase	4	4	1	1	1090				533	533	533	0c5d6aed1d23427ac77815eabcecea75_4121	c4610aa9a2d5bacd833356b3605d9b21_4120	f0f6386fb62ec3a09e34ad652cf53efb_5480	S_aureus_10_02174
QNV78676.1		polysaccharide lyase 8 family protein	4	4	1	1	1824				2426	2426	2426	0c5d6aed1d23427ac77815eabcecea75_4596	c4610aa9a2d5bacd833356b3605d9b21_4593	f0f6386fb62ec3a09e34ad652cf53efb_5001	S_aureus_10_01806
isdF		hemin ABC transporter permease protein IsdF	4	4	1	1	2641				965	968	966	0c5d6aed1d23427ac77815eabcecea75_2108	c4610aa9a2d5bacd833356b3605d9b21_2097	f0f6386fb62ec3a09e34ad652cf53efb_1877	S_aureus_10_00260
yycI		two-component system regulatory protein YycI	4	4	1	1	599				788	788	788	0c5d6aed1d23427ac77815eabcecea75_51	c4610aa9a2d5bacd833356b3605d9b21_51	f0f6386fb62ec3a09e34ad652cf53efb_3906	S_aureus_10_01131
pstC		phosphate ABC transporter permease subunit PstC	4	4	1	1	1975				926	926	926	0c5d6aed1d23427ac77815eabcecea75_2649	c4610aa9a2d5bacd833356b3605d9b21_2642	f0f6386fb62ec3a09e34ad652cf53efb_1330	S_aureus_10_00002
racE		glutamate racemase	4	4	1	1	2659				800	800	800	0c5d6aed1d23427ac77815eabcecea75_2144	c4610aa9a2d5bacd833356b3605d9b21_2133	f0f6386fb62ec3a09e34ad652cf53efb_1841	S_aureus_10_00244
WP_000768190.1		phosphoribosylanthranilate isomerase	4	4	1	1	1992				632	635	632	0c5d6aed1d23427ac77815eabcecea75_2615	c4610aa9a2d5bacd833356b3605d9b21_2608	f0f6386fb62ec3a09e34ad652cf53efb_1364	S_aureus_10_00018
WP_000136947.1		alpha/beta hydrolase	4	4	1	1	2071				914	917	914	0c5d6aed1d23427ac77815eabcecea75_2455	c4610aa9a2d5bacd833356b3605d9b21_2442	f0f6386fb62ec3a09e34ad652cf53efb_1526	S_aureus_10_00094
WP_000590809.1		amino acid ABC transporter ATP-binding protein	4	4	1	1	1521				722	728	725	0c5d6aed1d23427ac77815eabcecea75_3770	c4610aa9a2d5bacd833356b3605d9b21_3769	f0f6386fb62ec3a09e34ad652cf53efb_337	S_aureus_10_02431
luxA		LLM class flavin-dependent oxidoreductase	4	4	1	1	310				1061	1061	1061	0c5d6aed1d23427ac77815eabcecea75_635	c4610aa9a2d5bacd833356b3605d9b21_629	f0f6386fb62ec3a09e34ad652cf53efb_3348	S_aureus_10_00849
WP_000406848.1		2-oxo acid dehydrogenase subunit E2	4	4	1	1	1112				1274	1274	1274	0c5d6aed1d23427ac77815eabcecea75_2920	c4610aa9a2d5bacd833356b3605d9b21_2914	f0f6386fb62ec3a09e34ad652cf53efb_1057	S_aureus_10_01610
WP_000548932.1		ABC transporter permease	4	4	1	1	1983				830	830	830	0c5d6aed1d23427ac77815eabcecea75_2633	c4610aa9a2d5bacd833356b3605d9b21_2626	f0f6386fb62ec3a09e34ad652cf53efb_1346	S_aureus_10_00009
WP_001794550.1		YibE/F family protein	4	4	1	1	114				1112	1118	1116	0c5d6aed1d23427ac77815eabcecea75_863	c4610aa9a2d5bacd833356b3605d9b21_857	f0f6386fb62ec3a09e34ad652cf53efb_3120	S_aureus_10_02503
WP_240017420.1		efflux RND transporter permease subunit	4	4	1	1	1873				3167	3167	3167	0c5d6aed1d23427ac77815eabcecea75_4698	c4610aa9a2d5bacd833356b3605d9b21_4693	f0f6386fb62ec3a09e34ad652cf53efb_4899	S_aureus_10_01853
WP_000732090.1		YehR family lipoprotein	4	4	1	1	933				455	455	455	0c5d6aed1d23427ac77815eabcecea75_5115	c4610aa9a2d5bacd833356b3605d9b21_5110	f0f6386fb62ec3a09e34ad652cf53efb_4482	S_aureus_10_01404
leuA_2		2-isopropylmalate synthase	4	4	1	1	1682				1529	1529	1529	0c5d6aed1d23427ac77815eabcecea75_4257	c4610aa9a2d5bacd833356b3605d9b21_4256	f0f6386fb62ec3a09e34ad652cf53efb_5344	S_aureus_10_02339
icaA		poly-beta-1,6 N-acetyl-D-glucosamine synthase IcaA	4	4	1	1	533				1238	1238	1238	0c5d6aed1d23427ac77815eabcecea75_5555	c4610aa9a2d5bacd833356b3605d9b21_5552	f0f6386fb62ec3a09e34ad652cf53efb_4044	S_aureus_10_01199
uvrA		excinuclease ABC subunit UvrA	4	4	1	1	2359				2846	2846	2846	0c5d6aed1d23427ac77815eabcecea75_1530	c4610aa9a2d5bacd833356b3605d9b21_1518	f0f6386fb62ec3a09e34ad652cf53efb_2453	S_aureus_10_00535
WP_240017424.1		ammonium transporter	4	4	1	1	1666				1250	1250	1250	0c5d6aed1d23427ac77815eabcecea75_4225	c4610aa9a2d5bacd833356b3605d9b21_4224	f0f6386fb62ec3a09e34ad652cf53efb_5376	S_aureus_10_02325
WP_086095151.1		NADP-dependent oxidoreductase	4	4	1	1	1808				1001	1004	1001	0c5d6aed1d23427ac77815eabcecea75_4560	c4610aa9a2d5bacd833356b3605d9b21_4559	f0f6386fb62ec3a09e34ad652cf53efb_5037	S_aureus_10_01791
rlmN		23S rRNA (adenine(2503)-C(2))-methyltransferase RlmN	4	4	1	1	2723				1094	1094	1094	0c5d6aed1d23427ac77815eabcecea75_2285	c4610aa9a2d5bacd833356b3605d9b21_2272	f0f6386fb62ec3a09e34ad652cf53efb_1696	S_aureus_10_00177
RBKS		winged helix-turn-helix transcriptional regulator	4	4	1	1	337				1118	1118	1118	0c5d6aed1d23427ac77815eabcecea75_579	c4610aa9a2d5bacd833356b3605d9b21_573	f0f6386fb62ec3a09e34ad652cf53efb_3404	S_aureus_10_00876
WP_000829167.1		citrate synthase	4	4	1	1	1282				1121	1121	1121	0c5d6aed1d23427ac77815eabcecea75_3276	c4610aa9a2d5bacd833356b3605d9b21_3269	f0f6386fb62ec3a09e34ad652cf53efb_701	S_aureus_10_01955
WP_000751200.1		CHAP domain-containing protein	4	4	1	1	369				893	902	895	0c5d6aed1d23427ac77815eabcecea75_517	c4610aa9a2d5bacd833356b3605d9b21_513	f0f6386fb62ec3a09e34ad652cf53efb_3470	S_aureus_10_00906
hpt		hypoxanthine phosphoribosyltransferase	4	4	1	1	71				539	539	539	0c5d6aed1d23427ac77815eabcecea75_964	c4610aa9a2d5bacd833356b3605d9b21_958	f0f6386fb62ec3a09e34ad652cf53efb_3019	S_aureus_10_02549
WP_072384810.1		DeoR/GlpR family DNA-binding transcription regulator	4	4	1	1	2295				761	764	763	0c5d6aed1d23427ac77815eabcecea75_1397	c4610aa9a2d5bacd833356b3605d9b21_1387	f0f6386fb62ec3a09e34ad652cf53efb_2586	S_aureus_10_00595
glnA		type I glutamate--ammonia ligase	4	4	1	1	2064				1340	1340	1340	0c5d6aed1d23427ac77815eabcecea75_2469	c4610aa9a2d5bacd833356b3605d9b21_2456	f0f6386fb62ec3a09e34ad652cf53efb_1512	S_aureus_10_00087
pepF		oligoendopeptidase F	4	4	1	1	1979				1814	1814	1814	0c5d6aed1d23427ac77815eabcecea75_2641	c4610aa9a2d5bacd833356b3605d9b21_2634	f0f6386fb62ec3a09e34ad652cf53efb_1338	S_aureus_10_00006
WP_000833481.1		cupin domain-containing protein	4	4	1	1	2267				473	473	473	0c5d6aed1d23427ac77815eabcecea75_1339	c4610aa9a2d5bacd833356b3605d9b21_1329	f0f6386fb62ec3a09e34ad652cf53efb_2644	S_aureus_10_00623
isdC		heme uptake protein IsdC	4	4	1	1	2638				683	683	683	0c5d6aed1d23427ac77815eabcecea75_2102	c4610aa9a2d5bacd833356b3605d9b21_2091	f0f6386fb62ec3a09e34ad652cf53efb_1883	S_aureus_10_00263
WP_000030050.1		aspartate aminotransferase family protein	4	4	1	1	464				1337	1337	1337	0c5d6aed1d23427ac77815eabcecea75_5411	c4610aa9a2d5bacd833356b3605d9b21_5408	f0f6386fb62ec3a09e34ad652cf53efb_4188	S_aureus_10_01263
WP_000368902.1		ACT domain-containing protein	4	4	1	1	1236				455	458	455	0c5d6aed1d23427ac77815eabcecea75_3176	c4610aa9a2d5bacd833356b3605d9b21_3170	f0f6386fb62ec3a09e34ad652cf53efb_801	S_aureus_10_01734
WP_001030711.1		APC family permease	4	4	1	1	941				1637	1637	1637	0c5d6aed1d23427ac77815eabcecea75_5099	c4610aa9a2d5bacd833356b3605d9b21_5094	f0f6386fb62ec3a09e34ad652cf53efb_4498	S_aureus_10_01412
WP_001802886.1		YagU family protein	4	4	1	1	725				479	494	482	0c5d6aed1d23427ac77815eabcecea75_313	c4610aa9a2d5bacd833356b3605d9b21_309	f0f6386fb62ec3a09e34ad652cf53efb_3680	S_aureus_10_01002
putP		sodium/proline symporter PutP	4	4	1	1	1475				1538	1538	1538	0c5d6aed1d23427ac77815eabcecea75_3959	c4610aa9a2d5bacd833356b3605d9b21_3958	f0f6386fb62ec3a09e34ad652cf53efb_145	S_aureus_10_02104
WP_000171648.1		acyl-CoA/acyl-ACP dehydrogenase	4	4	1	1	719				1031	1034	1031	0c5d6aed1d23427ac77815eabcecea75_301	c4610aa9a2d5bacd833356b3605d9b21_297	f0f6386fb62ec3a09e34ad652cf53efb_3692	S_aureus_10_01008
treP		PTS system trehalose-specific EIIBC component	4	4	1	1	110				1427	1427	1427	0c5d6aed1d23427ac77815eabcecea75_874	c4610aa9a2d5bacd833356b3605d9b21_868	f0f6386fb62ec3a09e34ad652cf53efb_3109	S_aureus_10_02498
WP_045177762.1		UDP-N-acetylmuramoyl-tripeptide--D-alanyl-D-alanine ligase	4	4	1	1	1708				1358	1358	1358	0c5d6aed1d23427ac77815eabcecea75_4324	c4610aa9a2d5bacd833356b3605d9b21_4323	f0f6386fb62ec3a09e34ad652cf53efb_5277	S_aureus_10_02258
sspA		Glu-specific serine endopeptidase SspA	4	4	1	1	2555				1010	1010	1010	0c5d6aed1d23427ac77815eabcecea75_1935	c4610aa9a2d5bacd833356b3605d9b21_1922	f0f6386fb62ec3a09e34ad652cf53efb_2050	S_aureus_10_00343
WP_000868252.1		hypothetical protein	4	4	1	1	187				383	386	383	0c5d6aed1d23427ac77815eabcecea75_714	c4610aa9a2d5bacd833356b3605d9b21_710	f0f6386fb62ec3a09e34ad652cf53efb_3269	S_aureus_10_00812
opuCA		ABC transporter ATP-binding protein	4	4	1	1	945				1226	1226	1226	0c5d6aed1d23427ac77815eabcecea75_5091	c4610aa9a2d5bacd833356b3605d9b21_5086	f0f6386fb62ec3a09e34ad652cf53efb_4506	S_aureus_10_01414
norA		multidrug efflux MFS transporter NorA	4	4	1	1	2292				1166	1166	1166	0c5d6aed1d23427ac77815eabcecea75_1391	c4610aa9a2d5bacd833356b3605d9b21_1381	f0f6386fb62ec3a09e34ad652cf53efb_2592	S_aureus_10_00598
rpoC		DNA-directed RNA polymerase subunit beta'	4	4	1	1	36				3596	3623	3602	0c5d6aed1d23427ac77815eabcecea75_1083	c4610aa9a2d5bacd833356b3605d9b21_1077	f0f6386fb62ec3a09e34ad652cf53efb_2900	S_aureus_10_00748
asp2		accessory Sec system protein Asp2	4	4	1	1	518				1568	1571	1568	0c5d6aed1d23427ac77815eabcecea75_5525	c4610aa9a2d5bacd833356b3605d9b21_5522	f0f6386fb62ec3a09e34ad652cf53efb_4074	S_aureus_10_01214
recR		recombination mediator RecR	4	4	1	1	103				596	596	596	0c5d6aed1d23427ac77815eabcecea75_891	c4610aa9a2d5bacd833356b3605d9b21_885	f0f6386fb62ec3a09e34ad652cf53efb_3092	S_aureus_10_02492
WP_000469949.1		ABC transporter permease	4	4	1	1	1982				986	986	986	0c5d6aed1d23427ac77815eabcecea75_2635	c4610aa9a2d5bacd833356b3605d9b21_2628	f0f6386fb62ec3a09e34ad652cf53efb_1344	S_aureus_10_00008
cna		collagen adhesin Cna	4	4	1	1	559				3551	3551	3551	0c5d6aed1d23427ac77815eabcecea75_5605	c4610aa9a2d5bacd833356b3605d9b21_5604	f0f6386fb62ec3a09e34ad652cf53efb_3994	S_aureus_10_01173
WP_001017867.1		rhomboid family intramembrane serine protease	4	4	1	1	1146				1463	1463	1463	0c5d6aed1d23427ac77815eabcecea75_2989	c4610aa9a2d5bacd833356b3605d9b21_2983	f0f6386fb62ec3a09e34ad652cf53efb_988	S_aureus_10_01642
WP_117184657.1		ABC transporter permease subunit	4	4	1	1	1520				1457	1457	1457	0c5d6aed1d23427ac77815eabcecea75_3772	c4610aa9a2d5bacd833356b3605d9b21_3771	f0f6386fb62ec3a09e34ad652cf53efb_335	S_aureus_10_02430
cadD		cadmium resistance transporter CadD	4	4	1	2	10				617	617	617	0c5d6aed1d23427ac77815eabcecea75_5652	c4610aa9a2d5bacd833356b3605d9b21_5653	f0f6386fb62ec3a09e34ad652cf53efb_5505	S_aureus_10_02596
hisS		histidine--tRNA ligase	4	4	1	1	1224				1262	1262	1262	0c5d6aed1d23427ac77815eabcecea75_3152	c4610aa9a2d5bacd833356b3605d9b21_3146	f0f6386fb62ec3a09e34ad652cf53efb_825	S_aureus_10_01722
WP_045177732.1		lytic regulatory protein	4	4	1	1	1772				1091	1091	1091	0c5d6aed1d23427ac77815eabcecea75_4455	c4610aa9a2d5bacd833356b3605d9b21_4454	f0f6386fb62ec3a09e34ad652cf53efb_5146	S_aureus_10_02194
QNV79073.1		ABC transporter permease	4	4	1	1	487				2000	2000	2000	0c5d6aed1d23427ac77815eabcecea75_5463	c4610aa9a2d5bacd833356b3605d9b21_5460	f0f6386fb62ec3a09e34ad652cf53efb_4136	S_aureus_10_01244
vwb		von Willebrand factor binding protein Vwb	4	4	1	1	2389				1538	1538	1538	0c5d6aed1d23427ac77815eabcecea75_1595	c4610aa9a2d5bacd833356b3605d9b21_1581	f0f6386fb62ec3a09e34ad652cf53efb_2390	S_aureus_10_00505
nagE		N-acetylglucosamine-specific PTS transporter subunit IIBC	4	4	1	1	1313				1466	1466	1466	0c5d6aed1d23427ac77815eabcecea75_3340	c4610aa9a2d5bacd833356b3605d9b21_3333	f0f6386fb62ec3a09e34ad652cf53efb_637	S_aureus_10_01984
WP_086095188.1		nitrate reductase subunit alpha	4	4	1	1	998				3689	3689	3689	0c5d6aed1d23427ac77815eabcecea75_4979	c4610aa9a2d5bacd833356b3605d9b21_4976	f0f6386fb62ec3a09e34ad652cf53efb_4618	S_aureus_10_01465
sfaC		staphyloferrin A biosynthesis protein SfaC	4	4	1	1	1799				1070	1070	1070	0c5d6aed1d23427ac77815eabcecea75_4542	c4610aa9a2d5bacd833356b3605d9b21_4541	f0f6386fb62ec3a09e34ad652cf53efb_5055	S_aureus_10_01782
WP_000052310.1		ABC transporter ATP-binding protein	4	4	1	1	1984				773	776	773	0c5d6aed1d23427ac77815eabcecea75_2631	c4610aa9a2d5bacd833356b3605d9b21_2624	f0f6386fb62ec3a09e34ad652cf53efb_1348	S_aureus_10_00010
WP_000370140.1		RNA-binding transcriptional accessory protein	4	4	1	1	1689				2138	2150	2147	0c5d6aed1d23427ac77815eabcecea75_4286	c4610aa9a2d5bacd833356b3605d9b21_4285	f0f6386fb62ec3a09e34ad652cf53efb_5315	S_aureus_10_02276
WP_000066356.1		hypothetical protein	4	4	1	1	448				368	371	368	0c5d6aed1d23427ac77815eabcecea75_5379	c4610aa9a2d5bacd833356b3605d9b21_5376	f0f6386fb62ec3a09e34ad652cf53efb_4220	S_aureus_10_01279
smc		chromosome segregation protein SMC	4	4	1	1	2140				3566	3566	3566	0c5d6aed1d23427ac77815eabcecea75_2317	c4610aa9a2d5bacd833356b3605d9b21_2304	f0f6386fb62ec3a09e34ad652cf53efb_1664	S_aureus_10_00161
WP_045177471.1		dynamin family protein	4	4	1	1	299				3440	3440	3440	0c5d6aed1d23427ac77815eabcecea75_2764	c4610aa9a2d5bacd833356b3605d9b21_2758	f0f6386fb62ec3a09e34ad652cf53efb_1217	S_aureus_10_01537
nsaR		nisin susceptibility-associated two-component system response regulator NsaR	4	4	1	1	490				665	665	665	0c5d6aed1d23427ac77815eabcecea75_5469	c4610aa9a2d5bacd833356b3605d9b21_5466	f0f6386fb62ec3a09e34ad652cf53efb_4130	S_aureus_10_01241
sdrE		MSCRAMM family adhesin SdrE	4	4	1	1	2163				3488	3506	3501	0c5d6aed1d23427ac77815eabcecea75_1123	c4610aa9a2d5bacd833356b3605d9b21_1117	f0f6386fb62ec3a09e34ad652cf53efb_2860	S_aureus_10_00727
WP_000427770.1		dipeptide ABC transporter ATP-binding protein	4	4	1	1	2498				980	980	980	0c5d6aed1d23427ac77815eabcecea75_1814	c4610aa9a2d5bacd833356b3605d9b21_1802	f0f6386fb62ec3a09e34ad652cf53efb_2171	S_aureus_10_00397
group_2631	cls	cardiolipin synthase	4	4	1	1	1714				1484	1484	1484	0c5d6aed1d23427ac77815eabcecea75_4336	c4610aa9a2d5bacd833356b3605d9b21_4335	f0f6386fb62ec3a09e34ad652cf53efb_5265	S_aureus_10_02252
WP_000149403.1		formate--tetrahydrofolate ligase	4	4	1	1	1321				1667	1667	1667	0c5d6aed1d23427ac77815eabcecea75_3356	c4610aa9a2d5bacd833356b3605d9b21_3349	f0f6386fb62ec3a09e34ad652cf53efb_621	S_aureus_10_01990
feoB		ferrous iron transport protein B	4	4	1	1	413				1994	1994	1994	0c5d6aed1d23427ac77815eabcecea75_5307	c4610aa9a2d5bacd833356b3605d9b21_5304	f0f6386fb62ec3a09e34ad652cf53efb_4292	S_aureus_10_01313
WP_072353806.1		Na/Pi cotransporter family protein	4	4	1	1	650				1661	1667	1662	0c5d6aed1d23427ac77815eabcecea75_161	c4610aa9a2d5bacd833356b3605d9b21_159	f0f6386fb62ec3a09e34ad652cf53efb_3832	S_aureus_10_01077
WP_000101542.1		amino acid permease	4	4	1	1	955				1409	1409	1409	0c5d6aed1d23427ac77815eabcecea75_5071	c4610aa9a2d5bacd833356b3605d9b21_5066	f0f6386fb62ec3a09e34ad652cf53efb_4526	S_aureus_10_01424
mneS		cation diffusion facilitator family transporter	4	4	1	1	976				866	866	866	0c5d6aed1d23427ac77815eabcecea75_5025	c4610aa9a2d5bacd833356b3605d9b21_5020	f0f6386fb62ec3a09e34ad652cf53efb_4572	S_aureus_10_01444
WP_045177537.1		ABC-2 transporter permease	4	4	1	1	213				629	629	629	0c5d6aed1d23427ac77815eabcecea75_663	c4610aa9a2d5bacd833356b3605d9b21_657	f0f6386fb62ec3a09e34ad652cf53efb_3320	S_aureus_10_00835
WP_164094450.1		LCP family protein	4	4	1	1	2001				983	983	983	0c5d6aed1d23427ac77815eabcecea75_2597	c4610aa9a2d5bacd833356b3605d9b21_2590	f0f6386fb62ec3a09e34ad652cf53efb_1382	S_aureus_10_00027
WP_000342266.1		O-methyltransferase	4	4	1	1	1208				638	638	638	0c5d6aed1d23427ac77815eabcecea75_3115	c4610aa9a2d5bacd833356b3605d9b21_3109	f0f6386fb62ec3a09e34ad652cf53efb_862	S_aureus_10_01706
QNV78722.1		AEC family transporter	4	4	1	1	1870				908	908	908	0c5d6aed1d23427ac77815eabcecea75_4692	c4610aa9a2d5bacd833356b3605d9b21_4687	f0f6386fb62ec3a09e34ad652cf53efb_4905	S_aureus_10_01850
WP_000163829.1		PepSY domain-containing protein	4	4	1	1	1337				311	314	311	0c5d6aed1d23427ac77815eabcecea75_3388	c4610aa9a2d5bacd833356b3605d9b21_3381	f0f6386fb62ec3a09e34ad652cf53efb_589	S_aureus_10_02004
WP_240017418.1		SDR family oxidoreductase	4	4	1	1	914				695	695	695	0c5d6aed1d23427ac77815eabcecea75_5153	c4610aa9a2d5bacd833356b3605d9b21_5148	f0f6386fb62ec3a09e34ad652cf53efb_4444	S_aureus_10_01385
WP_001036648.1		bifunctional cystathionine gamma-lyase/homocysteine desulfhydrase	4	4	1	1	123				1142	1142	1142	0c5d6aed1d23427ac77815eabcecea75_845	c4610aa9a2d5bacd833356b3605d9b21_839	f0f6386fb62ec3a09e34ad652cf53efb_3138	S_aureus_10_02512
WP_000159026.1		DNA/RNA non-specific endonuclease	4	4	1	1	358				1844	1853	1846	0c5d6aed1d23427ac77815eabcecea75_539	c4610aa9a2d5bacd833356b3605d9b21_535	f0f6386fb62ec3a09e34ad652cf53efb_3448	S_aureus_10_00895
uvrC		excinuclease ABC subunit UvrC	4	4	1	1	2655				1781	1781	1781	0c5d6aed1d23427ac77815eabcecea75_2136	c4610aa9a2d5bacd833356b3605d9b21_2125	f0f6386fb62ec3a09e34ad652cf53efb_1849	S_aureus_10_00248
sasK		LPXTG-anchored surface protein SasK	4	4	1	1	456				635	638	635	0c5d6aed1d23427ac77815eabcecea75_5395	c4610aa9a2d5bacd833356b3605d9b21_5392	f0f6386fb62ec3a09e34ad652cf53efb_4204	S_aureus_10_01271
group_2647	gap	type I glyceraldehyde-3-phosphate dehydrogenase	4	4	1	1	2372				1010	1010	1010	0c5d6aed1d23427ac77815eabcecea75_1556	c4610aa9a2d5bacd833356b3605d9b21_1544	f0f6386fb62ec3a09e34ad652cf53efb_2427	S_aureus_10_00521
WP_000654185.1		TIGR01440 family protein	4	4	1	1	1739				524	524	524	0c5d6aed1d23427ac77815eabcecea75_4389	c4610aa9a2d5bacd833356b3605d9b21_4388	f0f6386fb62ec3a09e34ad652cf53efb_5212	S_aureus_10_02227
mepA		multidrug efflux MATE transporter MepA	4	4	1	1	314				1355	1355	1355	0c5d6aed1d23427ac77815eabcecea75_627	c4610aa9a2d5bacd833356b3605d9b21_621	f0f6386fb62ec3a09e34ad652cf53efb_3356	S_aureus_10_00853
cpdA_2		exonuclease SbcCD subunit D	4	4	1	1	1535				1196	1196	1196	0c5d6aed1d23427ac77815eabcecea75_3742	c4610aa9a2d5bacd833356b3605d9b21_3741	f0f6386fb62ec3a09e34ad652cf53efb_365	S_aureus_10_02444
WP_000287588.1		1-acyl-sn-glycerol-3-phosphate acyltransferase	4	4	1	1	1314				617	617	617	0c5d6aed1d23427ac77815eabcecea75_3342	c4610aa9a2d5bacd833356b3605d9b21_3335	f0f6386fb62ec3a09e34ad652cf53efb_635	S_aureus_10_01985
group_2652	arcC	carbamate kinase	4	4	1	1	2675				932	935	932	0c5d6aed1d23427ac77815eabcecea75_2182	c4610aa9a2d5bacd833356b3605d9b21_2171	f0f6386fb62ec3a09e34ad652cf53efb_1803	S_aureus_10_00228
recQ		DNA helicase RecQ	4	4	1	1	2318				1778	1781	1780	0c5d6aed1d23427ac77815eabcecea75_1443	c4610aa9a2d5bacd833356b3605d9b21_1433	f0f6386fb62ec3a09e34ad652cf53efb_2540	S_aureus_10_00573
WP_086095183.1		DUF3427 domain-containing protein	4	4	1	1	902				2861	2861	2861	0c5d6aed1d23427ac77815eabcecea75_5181	c4610aa9a2d5bacd833356b3605d9b21_5176	f0f6386fb62ec3a09e34ad652cf53efb_4418	S_aureus_10_01373
isdD		iron-regulated surface determinant protein IsdD	4	4	1	1	2639				1076	1076	1076	0c5d6aed1d23427ac77815eabcecea75_2104	c4610aa9a2d5bacd833356b3605d9b21_2093	f0f6386fb62ec3a09e34ad652cf53efb_1881	S_aureus_10_00262
ppaC		manganese-dependent inorganic pyrophosphatase	4	4	1	1	1456				929	929	929	0c5d6aed1d23427ac77815eabcecea75_3997	c4610aa9a2d5bacd833356b3605d9b21_3996	f0f6386fb62ec3a09e34ad652cf53efb_107	S_aureus_10_02122
WP_000704946.1		hypothetical protein	4	4	1	1	170				479	479	479	0c5d6aed1d23427ac77815eabcecea75_751	c4610aa9a2d5bacd833356b3605d9b21_745	f0f6386fb62ec3a09e34ad652cf53efb_3232	S_aureus_10_00795
nirB		nitrite reductase large subunit NirB	4	4	1	1	995				2405	2405	2405	0c5d6aed1d23427ac77815eabcecea75_4985	c4610aa9a2d5bacd833356b3605d9b21_4982	f0f6386fb62ec3a09e34ad652cf53efb_4612	S_aureus_10_01462
hxlA		3-hexulose-6-phosphate synthase	4	4	1	1	2170				632	632	632	0c5d6aed1d23427ac77815eabcecea75_1137	c4610aa9a2d5bacd833356b3605d9b21_1131	f0f6386fb62ec3a09e34ad652cf53efb_2846	S_aureus_10_00720
oatA_2		acetyltransferase	4	4	1	1	430				1811	1811	1811	0c5d6aed1d23427ac77815eabcecea75_5343	c4610aa9a2d5bacd833356b3605d9b21_5340	f0f6386fb62ec3a09e34ad652cf53efb_4256	S_aureus_10_01296
coaBC		bifunctional phosphopantothenoylcysteine decarboxylase/phosphopantothenate--cysteine ligase CoaBC	4	4	1	1	2716				1199	1199	1199	0c5d6aed1d23427ac77815eabcecea75_2271	c4610aa9a2d5bacd833356b3605d9b21_2258	f0f6386fb62ec3a09e34ad652cf53efb_1710	S_aureus_10_00184
WP_025175003.1		tandem-type lipoprotein	4	4	1	1	142				812	815	812	0c5d6aed1d23427ac77815eabcecea75_807	c4610aa9a2d5bacd833356b3605d9b21_801	f0f6386fb62ec3a09e34ad652cf53efb_3176	S_aureus_10_02526
lip1		YSIRK domain-containing triacylglycerol lipase Lip1	4	4	1	1	537				2042	2045	2042	0c5d6aed1d23427ac77815eabcecea75_5563	c4610aa9a2d5bacd833356b3605d9b21_5560	f0f6386fb62ec3a09e34ad652cf53efb_4036	S_aureus_10_01195
mutS		DNA mismatch repair protein MutS	4	4	1	1	2077				2618	2618	2618	0c5d6aed1d23427ac77815eabcecea75_2443	c4610aa9a2d5bacd833356b3605d9b21_2430	f0f6386fb62ec3a09e34ad652cf53efb_1538	S_aureus_10_00100
WP_001793428.1		aminopeptidase	4	4	1	1	1500				1247	1256	1253	0c5d6aed1d23427ac77815eabcecea75_3907	c4610aa9a2d5bacd833356b3605d9b21_3906	f0f6386fb62ec3a09e34ad652cf53efb_197	S_aureus_10_02081
WP_001792494.1		tandem-type lipoprotein	4	4	1	1	903				773	776	773	0c5d6aed1d23427ac77815eabcecea75_5179	c4610aa9a2d5bacd833356b3605d9b21_5174	f0f6386fb62ec3a09e34ad652cf53efb_4420	S_aureus_10_01374
argC		N-acetyl-gamma-glutamyl-phosphate reductase	4	4	1	1	728				1031	1034	1031	0c5d6aed1d23427ac77815eabcecea75_319	c4610aa9a2d5bacd833356b3605d9b21_315	f0f6386fb62ec3a09e34ad652cf53efb_3674	S_aureus_10_00999
QNV78187.1		M42 family metallopeptidase	4	4	1	1	1336				1076	1076	1076	0c5d6aed1d23427ac77815eabcecea75_3386	c4610aa9a2d5bacd833356b3605d9b21_3379	f0f6386fb62ec3a09e34ad652cf53efb_591	S_aureus_10_02003
QNV79065.1		CitMHS family transporter	4	4	1	1	480				1370	1370	1370	0c5d6aed1d23427ac77815eabcecea75_5447	c4610aa9a2d5bacd833356b3605d9b21_5444	f0f6386fb62ec3a09e34ad652cf53efb_4152	S_aureus_10_01249
WP_045177096.1		NADH dehydrogenase subunit 5	4	4	1	1	132				1484	1484	1484	0c5d6aed1d23427ac77815eabcecea75_827	c4610aa9a2d5bacd833356b3605d9b21_821	f0f6386fb62ec3a09e34ad652cf53efb_3156	S_aureus_10_02519
dnaK		molecular chaperone DnaK	4	4	1	1	1177				1832	1832	1832	0c5d6aed1d23427ac77815eabcecea75_3051	c4610aa9a2d5bacd833356b3605d9b21_3045	f0f6386fb62ec3a09e34ad652cf53efb_926	S_aureus_10_01673
WP_045178112.1		DUF368 domain-containing protein	4	4	1	1	2418				851	851	851	0c5d6aed1d23427ac77815eabcecea75_1652	c4610aa9a2d5bacd833356b3605d9b21_1640	f0f6386fb62ec3a09e34ad652cf53efb_2333	S_aureus_10_00476
mgtE		magnesium transporter	4	4	1	1	2513				1385	1385	1385	0c5d6aed1d23427ac77815eabcecea75_1844	c4610aa9a2d5bacd833356b3605d9b21_1832	f0f6386fb62ec3a09e34ad652cf53efb_2141	S_aureus_10_00382
WP_001006453.1		cysteine desulfurase	4	4	1	1	2421				1241	1250	1247	0c5d6aed1d23427ac77815eabcecea75_1658	c4610aa9a2d5bacd833356b3605d9b21_1646	f0f6386fb62ec3a09e34ad652cf53efb_2327	S_aureus_10_00473
WP_000414184.1		bifunctional metallophosphatase/5'-nucleotidase	4	4	1	1	2528				1511	1514	1511	0c5d6aed1d23427ac77815eabcecea75_1875	c4610aa9a2d5bacd833356b3605d9b21_1862	f0f6386fb62ec3a09e34ad652cf53efb_2110	S_aureus_10_00367
WP_000049154.1		amino acid permease	4	4	1	1	1268				1493	1493	1493	0c5d6aed1d23427ac77815eabcecea75_3245	c4610aa9a2d5bacd833356b3605d9b21_3239	f0f6386fb62ec3a09e34ad652cf53efb_732	S_aureus_10_01763
WP_001058591.1		bifunctional (p)ppGpp synthetase/guanosine-3',5'-bis(diphosphate) 3'-pyrophosphohydrolase	4	4	1	1	1227				2189	2210	2194	0c5d6aed1d23427ac77815eabcecea75_3158	c4610aa9a2d5bacd833356b3605d9b21_3152	f0f6386fb62ec3a09e34ad652cf53efb_819	S_aureus_10_01725
sph		sphingomyelin phosphodiesterase	4	4	1	1	1645				824	830	827	0c5d6aed1d23427ac77815eabcecea75_4181	c4610aa9a2d5bacd833356b3605d9b21_4180	f0f6386fb62ec3a09e34ad652cf53efb_5420	S_aureus_10_02304
WP_072384790.1		trypsin-like peptidase domain-containing protein	4	4	1	1	2526				2309	2324	2320	0c5d6aed1d23427ac77815eabcecea75_1871	c4610aa9a2d5bacd833356b3605d9b21_1858	f0f6386fb62ec3a09e34ad652cf53efb_2114	S_aureus_10_00369
WP_086095174.1		pseudouridine-5'-phosphate glycosidase	4	4	1	1	336				923	923	923	0c5d6aed1d23427ac77815eabcecea75_581	c4610aa9a2d5bacd833356b3605d9b21_575	f0f6386fb62ec3a09e34ad652cf53efb_3402	S_aureus_10_00875
cap8P		type 8 capsular polysaccharide synthesis protein Cap8P	4	4	1	1	709				1145	1145	1145	0c5d6aed1d23427ac77815eabcecea75_281	c4610aa9a2d5bacd833356b3605d9b21_277	f0f6386fb62ec3a09e34ad652cf53efb_3712	S_aureus_10_01018
WP_000137775.1		U32 family peptidase	4	4	1	1	1207				923	923	923	0c5d6aed1d23427ac77815eabcecea75_3113	c4610aa9a2d5bacd833356b3605d9b21_3107	f0f6386fb62ec3a09e34ad652cf53efb_864	S_aureus_10_01705
WP_240017431.1		DNA translocase FtsK	4	4	1	1	1332				3824	3824	3824	0c5d6aed1d23427ac77815eabcecea75_3378	c4610aa9a2d5bacd833356b3605d9b21_3371	f0f6386fb62ec3a09e34ad652cf53efb_599	S_aureus_10_01999
clpB		ATP-dependent chaperone ClpB	4	4	1	1	2480				2609	2609	2609	0c5d6aed1d23427ac77815eabcecea75_1778	c4610aa9a2d5bacd833356b3605d9b21_1766	f0f6386fb62ec3a09e34ad652cf53efb_2207	S_aureus_10_00415
crtN		NAD(P)/FAD-dependent oxidoreductase	4	4	1	1	425				1508	1508	1508	0c5d6aed1d23427ac77815eabcecea75_5331	c4610aa9a2d5bacd833356b3605d9b21_5328	f0f6386fb62ec3a09e34ad652cf53efb_4268	S_aureus_10_01302
WP_001291497.1		M20 family metallopeptidase	4	4	1	1	1758				1184	1184	1184	0c5d6aed1d23427ac77815eabcecea75_4427	c4610aa9a2d5bacd833356b3605d9b21_4426	f0f6386fb62ec3a09e34ad652cf53efb_5174	S_aureus_10_02208
ahpF		alkyl hydroperoxide reductase subunit F	4	4	1	1	183				1523	1523	1523	0c5d6aed1d23427ac77815eabcecea75_720	c4610aa9a2d5bacd833356b3605d9b21_716	f0f6386fb62ec3a09e34ad652cf53efb_3263	S_aureus_10_00808
rsbU		PP2C family protein-serine/threonine phosphatase	4	4	1	1	1693				1001	1001	1001	0c5d6aed1d23427ac77815eabcecea75_4294	c4610aa9a2d5bacd833356b3605d9b21_4293	f0f6386fb62ec3a09e34ad652cf53efb_5307	S_aureus_10_02272
pnp		polyribonucleotide nucleotidyltransferase	4	4	1	1	2098				2096	2096	2096	0c5d6aed1d23427ac77815eabcecea75_2401	c4610aa9a2d5bacd833356b3605d9b21_2388	f0f6386fb62ec3a09e34ad652cf53efb_1580	S_aureus_10_00121
aroD		type I 3-dehydroquinate dehydratase	4	4	1	1	2405				716	716	716	0c5d6aed1d23427ac77815eabcecea75_1627	c4610aa9a2d5bacd833356b3605d9b21_1613	f0f6386fb62ec3a09e34ad652cf53efb_2358	S_aureus_10_00489
WP_045176936.1		phosphoglycerate dehydrogenase	4	4	1	1	1517				950	959	952	0c5d6aed1d23427ac77815eabcecea75_3871	c4610aa9a2d5bacd833356b3605d9b21_3870	f0f6386fb62ec3a09e34ad652cf53efb_233	S_aureus_10_02064
metK		methionine adenosyltransferase	4	4	1	1	1377				1193	1193	1193	0c5d6aed1d23427ac77815eabcecea75_3469	c4610aa9a2d5bacd833356b3605d9b21_3462	f0f6386fb62ec3a09e34ad652cf53efb_508	S_aureus_10_02043
WP_000334518.1		hypothetical protein	4	4	1	1	826				809	809	809	0c5d6aed1d23427ac77815eabcecea75_2702	c4610aa9a2d5bacd833356b3605d9b21_2694	f0f6386fb62ec3a09e34ad652cf53efb_1279	S_aureus_10_01507
WP_000659770.1		formate/nitrite transporter family protein	4	4	1	1	344				824	824	824	0c5d6aed1d23427ac77815eabcecea75_565	c4610aa9a2d5bacd833356b3605d9b21_559	f0f6386fb62ec3a09e34ad652cf53efb_3418	S_aureus_10_00882
esaA		type VII secretion protein EsaA	4	4	1	1	367				3029	3029	3029	0c5d6aed1d23427ac77815eabcecea75_521	c4610aa9a2d5bacd833356b3605d9b21_517	f0f6386fb62ec3a09e34ad652cf53efb_3466	S_aureus_10_00904
WP_086095096.1		tandem-type lipoprotein	4	4	1	1	646				767	770	769	0c5d6aed1d23427ac77815eabcecea75_151	c4610aa9a2d5bacd833356b3605d9b21_149	f0f6386fb62ec3a09e34ad652cf53efb_3842	S_aureus_10_01081
hchA		protein deglycase HchA	4	4	1	1	28				878	878	878	0c5d6aed1d23427ac77815eabcecea75_1099	c4610aa9a2d5bacd833356b3605d9b21_1093	f0f6386fb62ec3a09e34ad652cf53efb_2884	S_aureus_10_00740
WP_000149503.1		protein arginine kinase	4	4	1	1	56				1007	1010	1007	0c5d6aed1d23427ac77815eabcecea75_1042	c4610aa9a2d5bacd833356b3605d9b21_1036	f0f6386fb62ec3a09e34ad652cf53efb_2941	S_aureus_10_00767
QNV76800.1		ABC transporter permease	4	4	1	1	745				1433	1478	1466	0c5d6aed1d23427ac77815eabcecea75_353	c4610aa9a2d5bacd833356b3605d9b21_349	f0f6386fb62ec3a09e34ad652cf53efb_3640	S_aureus_10_00983
rsmC		class I SAM-dependent methyltransferase	4	4	1	1	38				608	608	608	0c5d6aed1d23427ac77815eabcecea75_1079	c4610aa9a2d5bacd833356b3605d9b21_1073	f0f6386fb62ec3a09e34ad652cf53efb_2904	S_aureus_10_00750
WP_000028424.1		hypothetical protein	4	6	1.5	1	1604				173	173	173	0c5d6aed1d23427ac77815eabcecea75_3640 0c5d6aed1d23427ac77815eabcecea75_4127	c4610aa9a2d5bacd833356b3605d9b21_3635 c4610aa9a2d5bacd833356b3605d9b21_4126	f0f6386fb62ec3a09e34ad652cf53efb_5474	S_aureus_10_02491
farE		fatty acid efflux MMPL transporter FarE	4	4	1	1	415				2489	2489	2489	0c5d6aed1d23427ac77815eabcecea75_5311	c4610aa9a2d5bacd833356b3605d9b21_5308	f0f6386fb62ec3a09e34ad652cf53efb_4288	S_aureus_10_01311
WP_103146949.1		methionine ABC transporter ATP-binding protein	4	4	1	1	2414				1025	1025	1025	0c5d6aed1d23427ac77815eabcecea75_1644	c4610aa9a2d5bacd833356b3605d9b21_1632	f0f6386fb62ec3a09e34ad652cf53efb_2341	S_aureus_10_00480
WP_045178327.1		aldehyde dehydrogenase family protein	4	4	1	1	712				1487	1487	1487	0c5d6aed1d23427ac77815eabcecea75_287	c4610aa9a2d5bacd833356b3605d9b21_283	f0f6386fb62ec3a09e34ad652cf53efb_3706	S_aureus_10_01015
WP_000942744.1		acetyl-CoA carboxylase biotin carboxylase subunit	4	4	1	1	1200				1361	1361	1361	0c5d6aed1d23427ac77815eabcecea75_3099	c4610aa9a2d5bacd833356b3605d9b21_3093	f0f6386fb62ec3a09e34ad652cf53efb_878	S_aureus_10_01698
QNV76811.1		Gfo/Idh/MocA family oxidoreductase	4	4	1	1	756				1076	1079	1076	0c5d6aed1d23427ac77815eabcecea75_375	c4610aa9a2d5bacd833356b3605d9b21_371	f0f6386fb62ec3a09e34ad652cf53efb_3618	S_aureus_10_00972
WP_000241308.1		DUF1273 domain-containing protein	4	4	1	1	294				563	563	563	0c5d6aed1d23427ac77815eabcecea75_2777	c4610aa9a2d5bacd833356b3605d9b21_2771	f0f6386fb62ec3a09e34ad652cf53efb_1204	S_aureus_10_01543
tarJ'		alcohol dehydrogenase catalytic domain-containing protein	4	4	1	1	790				1025	1025	1025	0c5d6aed1d23427ac77815eabcecea75_449	c4610aa9a2d5bacd833356b3605d9b21_445	f0f6386fb62ec3a09e34ad652cf53efb_3538	S_aureus_10_00938
WP_014533155.1		DUF443 family protein	4	4	1	1	2196				620	623	620	0c5d6aed1d23427ac77815eabcecea75_1191	c4610aa9a2d5bacd833356b3605d9b21_1185	f0f6386fb62ec3a09e34ad652cf53efb_2792	S_aureus_10_00694
rnz		ribonuclease Z	4	4	1	1	232				920	920	920	0c5d6aed1d23427ac77815eabcecea75_2896	c4610aa9a2d5bacd833356b3605d9b21_2890	f0f6386fb62ec3a09e34ad652cf53efb_1081	S_aureus_10_01599
QNV76776.1		ABC transporter substrate-binding protein	4	4	1	1	717				974	974	974	0c5d6aed1d23427ac77815eabcecea75_297	c4610aa9a2d5bacd833356b3605d9b21_293	f0f6386fb62ec3a09e34ad652cf53efb_3696	S_aureus_10_01010
WP_000082559.1		SMP-30/gluconolactonase/LRE family protein	4	4	1	1	555				971	974	971	0c5d6aed1d23427ac77815eabcecea75_5597	c4610aa9a2d5bacd833356b3605d9b21_5596	f0f6386fb62ec3a09e34ad652cf53efb_4002	S_aureus_10_01177
isdB		heme uptake protein IsdB	4	4	1	1	2636				1934	1934	1934	0c5d6aed1d23427ac77815eabcecea75_2098	c4610aa9a2d5bacd833356b3605d9b21_2087	f0f6386fb62ec3a09e34ad652cf53efb_1887	S_aureus_10_00265
WP_240017448.1		DUF1963 domain-containing protein	4	4	1	1	2411				878	878	878	0c5d6aed1d23427ac77815eabcecea75_1637	c4610aa9a2d5bacd833356b3605d9b21_1625	f0f6386fb62ec3a09e34ad652cf53efb_2348	S_aureus_10_00483
fmtB		LPXTG-anchored DUF1542 repeat protein FmtB	4	4	1	1	1780				7496	7496	7496	0c5d6aed1d23427ac77815eabcecea75_4477	c4610aa9a2d5bacd833356b3605d9b21_4474	f0f6386fb62ec3a09e34ad652cf53efb_5124	S_aureus_10_02186
WP_001241185.1		glycosyltransferase family 2 protein	4	4	1	1	2237				1061	1061	1061	0c5d6aed1d23427ac77815eabcecea75_1279	c4610aa9a2d5bacd833356b3605d9b21_1269	f0f6386fb62ec3a09e34ad652cf53efb_2704	S_aureus_10_00652
aroC		chorismate synthase	4	4	1	1	274				1166	1166	1166	0c5d6aed1d23427ac77815eabcecea75_2817	c4610aa9a2d5bacd833356b3605d9b21_2811	f0f6386fb62ec3a09e34ad652cf53efb_1164	S_aureus_10_01562
WP_000146741.1		GNAT family N-acetyltransferase	4	4	1	1	1894				770	770	770	0c5d6aed1d23427ac77815eabcecea75_4740	c4610aa9a2d5bacd833356b3605d9b21_4735	f0f6386fb62ec3a09e34ad652cf53efb_4857	S_aureus_10_01873
tet(38)		tetracycline efflux MFS transporter Tet(38)	4	4	1	1	682				1352	1358	1353	0c5d6aed1d23427ac77815eabcecea75_227	c4610aa9a2d5bacd833356b3605d9b21_223	f0f6386fb62ec3a09e34ad652cf53efb_3766	S_aureus_10_01045
WP_000528922.1		S-adenosyl-l-methionine hydroxide adenosyltransferase family protein	4	4	1	1	552				848	848	848	0c5d6aed1d23427ac77815eabcecea75_5593	c4610aa9a2d5bacd833356b3605d9b21_5592	f0f6386fb62ec3a09e34ad652cf53efb_4006	S_aureus_10_01180
WP_001788648.1		YjjG family noncanonical pyrimidine nucleotidase	4	4	1	1	2682				686	695	692	0c5d6aed1d23427ac77815eabcecea75_2199	c4610aa9a2d5bacd833356b3605d9b21_2188	f0f6386fb62ec3a09e34ad652cf53efb_1782	S_aureus_10_00220
ribD		bifunctional diaminohydroxyphosphoribosylaminopyrimidine deaminase/5-amino-6-(5-phosphoribosylamino)uracil reductase RibD	4	4	1	1	1360				1031	1043	1040	0c5d6aed1d23427ac77815eabcecea75_3434	c4610aa9a2d5bacd833356b3605d9b21_3427	f0f6386fb62ec3a09e34ad652cf53efb_543	S_aureus_10_02026
WP_014532690.1		Hsp20/alpha crystallin family protein	4	4	1	1	1008				422	428	426	0c5d6aed1d23427ac77815eabcecea75_4959	c4610aa9a2d5bacd833356b3605d9b21_4956	f0f6386fb62ec3a09e34ad652cf53efb_4638	S_aureus_10_01475
WP_050969965.1		sterile alpha motif-like domain-containing protein	4	4	1	1	2399				203	203	203	0c5d6aed1d23427ac77815eabcecea75_1615	c4610aa9a2d5bacd833356b3605d9b21_1601	f0f6386fb62ec3a09e34ad652cf53efb_2370	S_aureus_10_00495
WP_000145564.1		DUF871 domain-containing protein	4	4	1	1	735				1040	1055	1051	0c5d6aed1d23427ac77815eabcecea75_333	c4610aa9a2d5bacd833356b3605d9b21_329	f0f6386fb62ec3a09e34ad652cf53efb_3660	S_aureus_10_00993
WP_086095185.1		type II toxin-antitoxin system Phd/YefM family antitoxin	4	4	1	1	934				257	257	257	0c5d6aed1d23427ac77815eabcecea75_5113	c4610aa9a2d5bacd833356b3605d9b21_5108	f0f6386fb62ec3a09e34ad652cf53efb_4484	S_aureus_10_01405
queG		tRNA epoxyqueuosine(34) reductase QueG	4	4	1	1	1522				1127	1142	1130	0c5d6aed1d23427ac77815eabcecea75_3768	c4610aa9a2d5bacd833356b3605d9b21_3767	f0f6386fb62ec3a09e34ad652cf53efb_339	S_aureus_10_02432
atpA		F0F1 ATP synthase subunit alpha	4	4	1	1	1730				1508	1520	1511	0c5d6aed1d23427ac77815eabcecea75_4371	c4610aa9a2d5bacd833356b3605d9b21_4370	f0f6386fb62ec3a09e34ad652cf53efb_5230	S_aureus_10_02236
lrgA		antiholin-like murein hydrolase modulator LrgA	4	4	1	1	800				437	443	441	0c5d6aed1d23427ac77815eabcecea75_469	c4610aa9a2d5bacd833356b3605d9b21_465	f0f6386fb62ec3a09e34ad652cf53efb_3518	S_aureus_10_00928
WP_000171859.1		hypothetical protein	4	4	1	1	1246				284	284	284	0c5d6aed1d23427ac77815eabcecea75_3197	c4610aa9a2d5bacd833356b3605d9b21_3191	f0f6386fb62ec3a09e34ad652cf53efb_780	S_aureus_10_01742
hfq		RNA chaperone Hfq	4	4	1	1	2069				233	233	233	0c5d6aed1d23427ac77815eabcecea75_2459	c4610aa9a2d5bacd833356b3605d9b21_2446	f0f6386fb62ec3a09e34ad652cf53efb_1522	S_aureus_10_00092
ytkD		nucleoside triphosphatase YtkD	4	4	1	1	1380				473	479	474	0c5d6aed1d23427ac77815eabcecea75_3476	c4610aa9a2d5bacd833356b3605d9b21_3469	f0f6386fb62ec3a09e34ad652cf53efb_501	S_aureus_10_02046
yjbH		protease adaptor protein YjbH	4	4	1	1	2506				806	815	808	0c5d6aed1d23427ac77815eabcecea75_1830	c4610aa9a2d5bacd833356b3605d9b21_1818	f0f6386fb62ec3a09e34ad652cf53efb_2155	S_aureus_10_00389
WP_000479576.1		amino acid ABC transporter permease	4	4	1	1	981				719	728	721	0c5d6aed1d23427ac77815eabcecea75_5015	c4610aa9a2d5bacd833356b3605d9b21_5010	f0f6386fb62ec3a09e34ad652cf53efb_4582	S_aureus_10_01449
WP_001172341.1		AMP-binding protein	4	4	1	1	468				1598	1619	1603	0c5d6aed1d23427ac77815eabcecea75_5421	c4610aa9a2d5bacd833356b3605d9b21_5418	f0f6386fb62ec3a09e34ad652cf53efb_4178	S_aureus_10_01259
fnbA		fibronectin-binding protein FnbA	4	4	1	1	890				3131	3173	3141	0c5d6aed1d23427ac77815eabcecea75_5205	c4610aa9a2d5bacd833356b3605d9b21_5200	f0f6386fb62ec3a09e34ad652cf53efb_4394	S_aureus_10_01361
WP_000499650.1		hypothetical protein	4	4	1	1	2023				233	236	233	0c5d6aed1d23427ac77815eabcecea75_2553	c4610aa9a2d5bacd833356b3605d9b21_2546	f0f6386fb62ec3a09e34ad652cf53efb_1426	S_aureus_10_00047
WP_001792480.1		peptide ABC transporter permease	4	4	1	1	865				722	731	728	0c5d6aed1d23427ac77815eabcecea75_5257	c4610aa9a2d5bacd833356b3605d9b21_5254	f0f6386fb62ec3a09e34ad652cf53efb_4342	S_aureus_10_01337
WP_049296600.1		metal ABC transporter permease	4	4	1	1	1152				863	872	865	0c5d6aed1d23427ac77815eabcecea75_3001	c4610aa9a2d5bacd833356b3605d9b21_2995	f0f6386fb62ec3a09e34ad652cf53efb_976	S_aureus_10_01648
WP_001154232.1		MFS transporter	4	4	1	1	2520				1190	1208	1194	0c5d6aed1d23427ac77815eabcecea75_1858	c4610aa9a2d5bacd833356b3605d9b21_1846	f0f6386fb62ec3a09e34ad652cf53efb_2127	S_aureus_10_00375
WP_001788928.1		ComEA family DNA-binding protein	4	4	1	1	1186				677	686	683	0c5d6aed1d23427ac77815eabcecea75_3069	c4610aa9a2d5bacd833356b3605d9b21_3063	f0f6386fb62ec3a09e34ad652cf53efb_908	S_aureus_10_01682
WP_001077635.1		glycerol-3-phosphate responsive antiterminator	4	4	1	1	2075				533	542	539	0c5d6aed1d23427ac77815eabcecea75_2447	c4610aa9a2d5bacd833356b3605d9b21_2434	f0f6386fb62ec3a09e34ad652cf53efb_1534	S_aureus_10_00098
WP_072384892.1		cysteine desulfurase	4	4	1	1	1302				1148	1166	1152	0c5d6aed1d23427ac77815eabcecea75_3318	c4610aa9a2d5bacd833356b3605d9b21_3311	f0f6386fb62ec3a09e34ad652cf53efb_659	S_aureus_10_01975
rpsI		30S ribosomal protein S9	4	4	1	1	1829				392	398	395	0c5d6aed1d23427ac77815eabcecea75_4608	c4610aa9a2d5bacd833356b3605d9b21_4603	f0f6386fb62ec3a09e34ad652cf53efb_4989	S_aureus_10_01810
WP_001789411.1		GntR family transcriptional regulator	4	4	1	1	680				740	755	751	0c5d6aed1d23427ac77815eabcecea75_223	c4610aa9a2d5bacd833356b3605d9b21_219	f0f6386fb62ec3a09e34ad652cf53efb_3770	S_aureus_10_01047
WP_001096479.1		polyprenyl synthetase family protein	4	4	1	1	271				944	959	955	0c5d6aed1d23427ac77815eabcecea75_2823	c4610aa9a2d5bacd833356b3605d9b21_2817	f0f6386fb62ec3a09e34ad652cf53efb_1158	S_aureus_10_01565
WP_000719329.1		alpha/beta hydrolase	4	4	1	1	1809				869	884	872	0c5d6aed1d23427ac77815eabcecea75_4562	c4610aa9a2d5bacd833356b3605d9b21_4561	f0f6386fb62ec3a09e34ad652cf53efb_5035	S_aureus_10_01792
WP_001123276.1		4-oxalocrotonate tautomerase	4	4	1	1	2000				185	188	185	0c5d6aed1d23427ac77815eabcecea75_2599	c4610aa9a2d5bacd833356b3605d9b21_2592	f0f6386fb62ec3a09e34ad652cf53efb_1380	S_aureus_10_00026
ptsG		glucose-specific PTS transporter subunit IIBC	4	4	1	1	401				2066	2099	2074	0c5d6aed1d23427ac77815eabcecea75_5283	c4610aa9a2d5bacd833356b3605d9b21_5280	f0f6386fb62ec3a09e34ad652cf53efb_4316	S_aureus_10_01325
WP_000551762.1		CtsR family transcriptional regulator	4	4	1	1	58				461	470	463	0c5d6aed1d23427ac77815eabcecea75_1038	c4610aa9a2d5bacd833356b3605d9b21_1032	f0f6386fb62ec3a09e34ad652cf53efb_2945	S_aureus_10_00769
WP_001834404.1		YybS family protein	4	4	1	1	591				923	938	934	0c5d6aed1d23427ac77815eabcecea75_29	c4610aa9a2d5bacd833356b3605d9b21_29	f0f6386fb62ec3a09e34ad652cf53efb_3928	S_aureus_10_01141
WP_228571367.1		GNAT family N-acetyltransferase	4	4	1	1	627				458	467	460	0c5d6aed1d23427ac77815eabcecea75_113	c4610aa9a2d5bacd833356b3605d9b21_111	f0f6386fb62ec3a09e34ad652cf53efb_3880	S_aureus_10_01100
WP_000175723.1		hypothetical protein	4	4	1	1	359				311	317	315	0c5d6aed1d23427ac77815eabcecea75_537	c4610aa9a2d5bacd833356b3605d9b21_533	f0f6386fb62ec3a09e34ad652cf53efb_3450	S_aureus_10_00896
WP_000422380.1		hypothetical protein	4	4	1	1	739				839	854	846	0c5d6aed1d23427ac77815eabcecea75_341	c4610aa9a2d5bacd833356b3605d9b21_337	f0f6386fb62ec3a09e34ad652cf53efb_3652	S_aureus_10_00989
WP_045177916.1		helix-turn-helix domain-containing protein	4	4	1	1	647				2198	2237	2227	0c5d6aed1d23427ac77815eabcecea75_153	c4610aa9a2d5bacd833356b3605d9b21_151	f0f6386fb62ec3a09e34ad652cf53efb_3840	S_aureus_10_01080
crtO		glycosyl-4,4'-diaponeurosporenoate acyltransferase	4	4	1	1	428				488	497	490	0c5d6aed1d23427ac77815eabcecea75_5339	c4610aa9a2d5bacd833356b3605d9b21_5336	f0f6386fb62ec3a09e34ad652cf53efb_4260	S_aureus_10_01298
rnpA		ribonuclease P protein component	4	4	1	1	577				347	353	351	0c5d6aed1d23427ac77815eabcecea75_5641	c4610aa9a2d5bacd833356b3605d9b21_5640	f0f6386fb62ec3a09e34ad652cf53efb_3958	S_aureus_10_01155
WP_001028376.1		PIN/TRAM domain-containing protein	4	4	1	1	53				1055	1073	1068	0c5d6aed1d23427ac77815eabcecea75_1048	c4610aa9a2d5bacd833356b3605d9b21_1042	f0f6386fb62ec3a09e34ad652cf53efb_2935	S_aureus_10_00764
QNV76731.1		MFS transporter	4	4	1	1	670				626	638	629	0c5d6aed1d23427ac77815eabcecea75_201	c4610aa9a2d5bacd833356b3605d9b21_199	f0f6386fb62ec3a09e34ad652cf53efb_3792	S_aureus_10_01057
WP_000351761.1		LysR family transcriptional regulator	4	4	1	1	405				863	878	874	0c5d6aed1d23427ac77815eabcecea75_5291	c4610aa9a2d5bacd833356b3605d9b21_5288	f0f6386fb62ec3a09e34ad652cf53efb_4308	S_aureus_10_01321
WP_001803470.1		hypothetical protein	4	4	1	1	2037				575	584	577	0c5d6aed1d23427ac77815eabcecea75_2521	c4610aa9a2d5bacd833356b3605d9b21_2514	f0f6386fb62ec3a09e34ad652cf53efb_1458	S_aureus_10_00061
WP_070014113.1		FTR1 family iron permease	4	4	1	1	220				1682	1712	1704	0c5d6aed1d23427ac77815eabcecea75_649	c4610aa9a2d5bacd833356b3605d9b21_643	f0f6386fb62ec3a09e34ad652cf53efb_3334	S_aureus_10_00842
coa		staphylocoagulase	4	4	1	1	768				1106	2045	1810	0c5d6aed1d23427ac77815eabcecea75_399	c4610aa9a2d5bacd833356b3605d9b21_395	f0f6386fb62ec3a09e34ad652cf53efb_3594	S_aureus_10_00960
WP_010922818.1		PrsW family intramembrane metalloprotease	4	4	1	1	774				1142	1229	1163	0c5d6aed1d23427ac77815eabcecea75_413	c4610aa9a2d5bacd833356b3605d9b21_409	f0f6386fb62ec3a09e34ad652cf53efb_3574	S_aureus_10_00954
WP_000669653.1		ABC transporter substrate-binding protein	4	4	1	1	775				1412	1475	1459	0c5d6aed1d23427ac77815eabcecea75_415	c4610aa9a2d5bacd833356b3605d9b21_411	f0f6386fb62ec3a09e34ad652cf53efb_3572	S_aureus_10_00953
WP_001794540.1		twin-arginine translocase TatA/TatE family subunit	4	4	1	1	218				215	224	221	0c5d6aed1d23427ac77815eabcecea75_653	c4610aa9a2d5bacd833356b3605d9b21_647	f0f6386fb62ec3a09e34ad652cf53efb_3330	S_aureus_10_00840
WP_000887780.1		hypothetical protein	4	4	1	1	184				278	1619	1283	0c5d6aed1d23427ac77815eabcecea75_718	c4610aa9a2d5bacd833356b3605d9b21_714	f0f6386fb62ec3a09e34ad652cf53efb_3265	S_aureus_10_00809
QNV76990.1		hypothetical protein	4	4	1	1	165				152	191	161	0c5d6aed1d23427ac77815eabcecea75_761	c4610aa9a2d5bacd833356b3605d9b21_755	f0f6386fb62ec3a09e34ad652cf53efb_3222	S_aureus_10_00789
WP_045177085.1		restriction endonuclease subunit S	4	4	1	1	148				632	1160	1028	0c5d6aed1d23427ac77815eabcecea75_795	c4610aa9a2d5bacd833356b3605d9b21_789	f0f6386fb62ec3a09e34ad652cf53efb_3188	S_aureus_10_02532
WP_045177119.1		tandem-type lipoprotein	4	4	1	1	144				779	809	786	0c5d6aed1d23427ac77815eabcecea75_803	c4610aa9a2d5bacd833356b3605d9b21_797	f0f6386fb62ec3a09e34ad652cf53efb_3180	S_aureus_10_02528
WP_000074800.1		hypothetical protein	4	4	1	1	139				287	296	293	0c5d6aed1d23427ac77815eabcecea75_813	c4610aa9a2d5bacd833356b3605d9b21_807	f0f6386fb62ec3a09e34ad652cf53efb_3170	S_aureus_10_02523
WP_001798389.1		hypothetical protein	4	4	1	1	138				194	260	243	0c5d6aed1d23427ac77815eabcecea75_815	c4610aa9a2d5bacd833356b3605d9b21_809	f0f6386fb62ec3a09e34ad652cf53efb_3168	S_aureus_10_02522
cysE		serine O-acetyltransferase	4	4	1	1	51				647	680	655	0c5d6aed1d23427ac77815eabcecea75_1052	c4610aa9a2d5bacd833356b3605d9b21_1046	f0f6386fb62ec3a09e34ad652cf53efb_2931	S_aureus_10_00762
WP_138271804.1		hypothetical protein	4	6	1.5	1	307				131	218	199	0c5d6aed1d23427ac77815eabcecea75_641	c4610aa9a2d5bacd833356b3605d9b21_635 c4610aa9a2d5bacd833356b3605d9b21_2742	f0f6386fb62ec3a09e34ad652cf53efb_3342	S_aureus_10_00846 S_aureus_10_01528
sdrD		MSCRAMM family adhesin SdrD	4	4	1	1	2162				4151	4223	4205	0c5d6aed1d23427ac77815eabcecea75_1121	c4610aa9a2d5bacd833356b3605d9b21_1115	f0f6386fb62ec3a09e34ad652cf53efb_2862	S_aureus_10_00728
WP_045177048.1		thiolase family protein	4	4	1	1	2175				1109	1139	1131	0c5d6aed1d23427ac77815eabcecea75_1147	c4610aa9a2d5bacd833356b3605d9b21_1141	f0f6386fb62ec3a09e34ad652cf53efb_2836	S_aureus_10_00715
WP_000671101.1		hypothetical protein	4	4	1	1	2177				236	269	260	0c5d6aed1d23427ac77815eabcecea75_1151	c4610aa9a2d5bacd833356b3605d9b21_1145	f0f6386fb62ec3a09e34ad652cf53efb_2832	S_aureus_10_00713
WP_000362356.1		lipoate--protein ligase family protein	4	4	1	1	2187				764	836	818	0c5d6aed1d23427ac77815eabcecea75_1173	c4610aa9a2d5bacd833356b3605d9b21_1167	f0f6386fb62ec3a09e34ad652cf53efb_2810	S_aureus_10_00702
WP_001834198.1		DUF443 domain-containing protein	4	4	1	1	2197				557	629	611	0c5d6aed1d23427ac77815eabcecea75_1193	c4610aa9a2d5bacd833356b3605d9b21_1187	f0f6386fb62ec3a09e34ad652cf53efb_2790	S_aureus_10_00693
WP_001788287.1		hypothetical protein	4	4	1	1	2205				506	521	517	0c5d6aed1d23427ac77815eabcecea75_1209	c4610aa9a2d5bacd833356b3605d9b21_1203	f0f6386fb62ec3a09e34ad652cf53efb_2774	S_aureus_10_00686
WP_000359086.1		DUF1934 domain-containing protein	4	4	1	1	2207				383	416	407	0c5d6aed1d23427ac77815eabcecea75_1215	c4610aa9a2d5bacd833356b3605d9b21_1209	f0f6386fb62ec3a09e34ad652cf53efb_2768	S_aureus_10_00684
WP_000749045.1		ABC transporter substrate-binding protein	4	4	1	1	2210				827	887	872	0c5d6aed1d23427ac77815eabcecea75_1221	c4610aa9a2d5bacd833356b3605d9b21_1215	f0f6386fb62ec3a09e34ad652cf53efb_2762	S_aureus_10_00681
sarX		HTH-type transcriptional regulator SarX	4	4	1	1	2265				359	425	375	0c5d6aed1d23427ac77815eabcecea75_1335	c4610aa9a2d5bacd833356b3605d9b21_1325	f0f6386fb62ec3a09e34ad652cf53efb_2648	S_aureus_10_00625
WP_001188074.1		C45 family autoproteolytic acyltransferase/hydolase	4	5	1.25	1	1450				188	1112	843	0c5d6aed1d23427ac77815eabcecea75_4011	c4610aa9a2d5bacd833356b3605d9b21_4012 c4610aa9a2d5bacd833356b3605d9b21_4010	f0f6386fb62ec3a09e34ad652cf53efb_93	S_aureus_10_02127
WP_000876318.1		ABC transporter permease	4	4	1	1	2330				971	1013	981	0c5d6aed1d23427ac77815eabcecea75_1473	c4610aa9a2d5bacd833356b3605d9b21_1461	f0f6386fb62ec3a09e34ad652cf53efb_2510	S_aureus_10_00561
WP_001120197.1		DUF771 domain-containing protein	4	4	1	1	1631				320	320	320	0c5d6aed1d23427ac77815eabcecea75_4155	c4610aa9a2d5bacd833356b3605d9b21_4154	f0f6386fb62ec3a09e34ad652cf53efb_5446	S_aureus_10_02290
WP_000735558.1		hypothetical protein	4	4	1	1	2214				506	506	506	0c5d6aed1d23427ac77815eabcecea75_1229	c4610aa9a2d5bacd833356b3605d9b21_1223	f0f6386fb62ec3a09e34ad652cf53efb_2754	S_aureus_10_00677
WP_045177733.1		SDR family oxidoreductase	4	4	1	1	1769				665	665	665	0c5d6aed1d23427ac77815eabcecea75_4449	c4610aa9a2d5bacd833356b3605d9b21_4448	f0f6386fb62ec3a09e34ad652cf53efb_5152	S_aureus_10_02197
fakB1		fatty acid kinase binding subunit FakB1	4	4	1	1	2346				866	866	866	0c5d6aed1d23427ac77815eabcecea75_1505	c4610aa9a2d5bacd833356b3605d9b21_1493	f0f6386fb62ec3a09e34ad652cf53efb_2478	S_aureus_10_00545
deoB		phosphopentomutase	4	4	1	1	684				1178	1178	1178	0c5d6aed1d23427ac77815eabcecea75_231	c4610aa9a2d5bacd833356b3605d9b21_227	f0f6386fb62ec3a09e34ad652cf53efb_3762	S_aureus_10_01043
trpS		tryptophan--tRNA ligase	4	4	1	1	2501				989	989	989	0c5d6aed1d23427ac77815eabcecea75_1820	c4610aa9a2d5bacd833356b3605d9b21_1808	f0f6386fb62ec3a09e34ad652cf53efb_2165	S_aureus_10_00394
pstB		phosphate ABC transporter ATP-binding protein PstB	4	4	1	1	1977				851	851	851	0c5d6aed1d23427ac77815eabcecea75_2645	c4610aa9a2d5bacd833356b3605d9b21_2638	f0f6386fb62ec3a09e34ad652cf53efb_1334	S_aureus_10_00004
WP_000545928.1		urease subunit gamma	4	4	1	1	1900				302	302	302	0c5d6aed1d23427ac77815eabcecea75_4752	c4610aa9a2d5bacd833356b3605d9b21_4747	f0f6386fb62ec3a09e34ad652cf53efb_4845	S_aureus_10_01879
rsmI		16S rRNA (cytidine(1402)-2'-O)-methyltransferase	4	4	1	1	93				839	839	839	0c5d6aed1d23427ac77815eabcecea75_920	c4610aa9a2d5bacd833356b3605d9b21_914	f0f6386fb62ec3a09e34ad652cf53efb_3063	S_aureus_10_02570
prfB		peptide chain release factor 2	4	4	1	1	2353				992	1037	1025	0c5d6aed1d23427ac77815eabcecea75_1518	c4610aa9a2d5bacd833356b3605d9b21_1506	f0f6386fb62ec3a09e34ad652cf53efb_2466	S_aureus_10_00540
WP_000095328.1		adenylosuccinate synthase	4	4	1	1	595				1283	1283	1283	0c5d6aed1d23427ac77815eabcecea75_37	c4610aa9a2d5bacd833356b3605d9b21_37	f0f6386fb62ec3a09e34ad652cf53efb_3920	S_aureus_10_01137
WP_000633068.1		magnesium transporter CorA family protein	4	4	1	1	1017				944	944	944	0c5d6aed1d23427ac77815eabcecea75_4941	c4610aa9a2d5bacd833356b3605d9b21_4938	f0f6386fb62ec3a09e34ad652cf53efb_4656	S_aureus_10_01484
dltC		D-alanine--poly(phosphoribitol) ligase subunit 2	4	4	1	1	2440				236	236	236	0c5d6aed1d23427ac77815eabcecea75_1698	c4610aa9a2d5bacd833356b3605d9b21_1686	f0f6386fb62ec3a09e34ad652cf53efb_2287	S_aureus_10_00455
WP_001118417.1		YlaN family protein	4	4	1	1	2620				275	275	275	0c5d6aed1d23427ac77815eabcecea75_2066	c4610aa9a2d5bacd833356b3605d9b21_2055	f0f6386fb62ec3a09e34ad652cf53efb_1919	S_aureus_10_00281
WP_001002340.1		hypothetical protein	4	4	1	1	2061				206	206	206	0c5d6aed1d23427ac77815eabcecea75_2475	c4610aa9a2d5bacd833356b3605d9b21_2462	f0f6386fb62ec3a09e34ad652cf53efb_1506	S_aureus_10_00084
tdcB		bifunctional threonine ammonia-lyase/L-serine ammonia-lyase TdcB	4	4	1	1	302				1040	1040	1040	0c5d6aed1d23427ac77815eabcecea75_2758	c4610aa9a2d5bacd833356b3605d9b21_2752	f0f6386fb62ec3a09e34ad652cf53efb_1223	S_aureus_10_01534
WP_000606210.1		epoxyqueuosine reductase QueH	4	4	1	1	453				722	722	722	0c5d6aed1d23427ac77815eabcecea75_5389	c4610aa9a2d5bacd833356b3605d9b21_5386	f0f6386fb62ec3a09e34ad652cf53efb_4210	S_aureus_10_01274
sbnC		staphyloferrin B biosynthesis protein SbnC	4	4	1	1	664				1754	1754	1754	0c5d6aed1d23427ac77815eabcecea75_187	c4610aa9a2d5bacd833356b3605d9b21_185	f0f6386fb62ec3a09e34ad652cf53efb_3806	S_aureus_10_01064
WP_000621175.1		type II toxin-antitoxin system PemK/MazF family toxin	4	4	1	1	1694				362	362	362	0c5d6aed1d23427ac77815eabcecea75_4296	c4610aa9a2d5bacd833356b3605d9b21_4295	f0f6386fb62ec3a09e34ad652cf53efb_5305	S_aureus_10_02271
WP_001010512.1		SUF system NifU family Fe-S cluster assembly protein	4	4	1	1	2422				464	464	464	0c5d6aed1d23427ac77815eabcecea75_1660	c4610aa9a2d5bacd833356b3605d9b21_1648	f0f6386fb62ec3a09e34ad652cf53efb_2325	S_aureus_10_00472
WP_000816304.1		TIGR01777 family oxidoreductase	4	4	1	1	2369				869	902	893	0c5d6aed1d23427ac77815eabcecea75_1550	c4610aa9a2d5bacd833356b3605d9b21_1538	f0f6386fb62ec3a09e34ad652cf53efb_2433	S_aureus_10_00524
queF		preQ(1) synthase	4	4	1	1	2325				500	500	500	0c5d6aed1d23427ac77815eabcecea75_1461	c4610aa9a2d5bacd833356b3605d9b21_1449	f0f6386fb62ec3a09e34ad652cf53efb_2522	S_aureus_10_00566
queD		6-carboxytetrahydropterin synthase QueD	4	4	1	1	2308				419	419	419	0c5d6aed1d23427ac77815eabcecea75_1423	c4610aa9a2d5bacd833356b3605d9b21_1413	f0f6386fb62ec3a09e34ad652cf53efb_2560	S_aureus_10_00582
WP_000486494.1		ABC transporter ATP-binding protein/permease	4	4	1	1	964				1733	1733	1733	0c5d6aed1d23427ac77815eabcecea75_5051	c4610aa9a2d5bacd833356b3605d9b21_5046	f0f6386fb62ec3a09e34ad652cf53efb_4546	S_aureus_10_01433
WP_000840574.1		class I SAM-dependent methyltransferase	4	4	1	1	1298				947	947	947	0c5d6aed1d23427ac77815eabcecea75_3310	c4610aa9a2d5bacd833356b3605d9b21_3303	f0f6386fb62ec3a09e34ad652cf53efb_667	S_aureus_10_01971
WP_000819532.1		diacylglycerol kinase	4	4	1	1	1166				344	344	344	0c5d6aed1d23427ac77815eabcecea75_3029	c4610aa9a2d5bacd833356b3605d9b21_3023	f0f6386fb62ec3a09e34ad652cf53efb_948	S_aureus_10_01662
WP_001140799.1		type Z 30S ribosomal protein S14	4	4	1	1	1849				185	185	185	0c5d6aed1d23427ac77815eabcecea75_4648	c4610aa9a2d5bacd833356b3605d9b21_4643	f0f6386fb62ec3a09e34ad652cf53efb_4949	S_aureus_10_01830
WP_001048371.1		DUF4479 domain-containing tRNA-binding protein	4	4	1	1	1333				596	596	596	0c5d6aed1d23427ac77815eabcecea75_3380	c4610aa9a2d5bacd833356b3605d9b21_3373	f0f6386fb62ec3a09e34ad652cf53efb_597	S_aureus_10_02000
gyrA		DNA gyrase subunit A	4	4	1	1	584				2663	2663	2663	0c5d6aed1d23427ac77815eabcecea75_13	c4610aa9a2d5bacd833356b3605d9b21_13	f0f6386fb62ec3a09e34ad652cf53efb_3944	S_aureus_10_01148
gatC		Asp-tRNA(Asn)/Glu-tRNA(Gln) amidotransferase subunit GatC	4	4	1	1	1476				302	302	302	0c5d6aed1d23427ac77815eabcecea75_3957	c4610aa9a2d5bacd833356b3605d9b21_3956	f0f6386fb62ec3a09e34ad652cf53efb_147	S_aureus_10_02103
WP_000654030.1		sugar-binding transcriptional regulator	4	4	1	1	2371				1013	1013	1013	0c5d6aed1d23427ac77815eabcecea75_1554	c4610aa9a2d5bacd833356b3605d9b21_1542	f0f6386fb62ec3a09e34ad652cf53efb_2429	S_aureus_10_00522
clfA		MSCRAMM family adhesin clumping factor ClfA	4	4	1	1	2388				2786	2912	2876	0c5d6aed1d23427ac77815eabcecea75_1593	c4610aa9a2d5bacd833356b3605d9b21_1579	f0f6386fb62ec3a09e34ad652cf53efb_2392	S_aureus_10_00506
ylqF		ribosome biogenesis GTPase YlqF	4	4	1	1	2131				884	884	884	0c5d6aed1d23427ac77815eabcecea75_2335	c4610aa9a2d5bacd833356b3605d9b21_2322	f0f6386fb62ec3a09e34ad652cf53efb_1646	S_aureus_10_00152
WP_000291417.1		alanine--glyoxylate aminotransferase family protein	4	4	1	1	1309				1160	1160	1160	0c5d6aed1d23427ac77815eabcecea75_3332	c4610aa9a2d5bacd833356b3605d9b21_3325	f0f6386fb62ec3a09e34ad652cf53efb_645	S_aureus_10_01981
WP_000782121.1		peptidylprolyl isomerase	4	4	1	1	1538				962	962	962	0c5d6aed1d23427ac77815eabcecea75_3736	c4610aa9a2d5bacd833356b3605d9b21_3735	f0f6386fb62ec3a09e34ad652cf53efb_371	S_aureus_10_02447
fumC		class II fumarate hydratase	4	4	1	1	1527				1385	1385	1385	0c5d6aed1d23427ac77815eabcecea75_3758	c4610aa9a2d5bacd833356b3605d9b21_3757	f0f6386fb62ec3a09e34ad652cf53efb_349	S_aureus_10_02437
WP_000904312.1		TatD family hydrolase	4	4	1	1	91				773	773	773	0c5d6aed1d23427ac77815eabcecea75_924	c4610aa9a2d5bacd833356b3605d9b21_918	f0f6386fb62ec3a09e34ad652cf53efb_3059	S_aureus_10_02568
WP_001041673.1		LysM peptidoglycan-binding domain-containing protein	4	4	1	1	2127				1118	1118	1118	0c5d6aed1d23427ac77815eabcecea75_2343	c4610aa9a2d5bacd833356b3605d9b21_2330	f0f6386fb62ec3a09e34ad652cf53efb_1638	S_aureus_10_00148
WP_000183669.1		GNAT family N-acetyltransferase	4	4	1	1	116				485	485	485	0c5d6aed1d23427ac77815eabcecea75_859	c4610aa9a2d5bacd833356b3605d9b21_853	f0f6386fb62ec3a09e34ad652cf53efb_3124	S_aureus_10_02505
WP_000620194.1		GNAT family N-acetyltransferase	4	4	1	1	819				509	509	509	0c5d6aed1d23427ac77815eabcecea75_2720	c4610aa9a2d5bacd833356b3605d9b21_2712	f0f6386fb62ec3a09e34ad652cf53efb_1261	S_aureus_10_01514
WP_000449077.1		protein-ADP-ribose hydrolase	4	4	1	1	323				800	800	800	0c5d6aed1d23427ac77815eabcecea75_609	c4610aa9a2d5bacd833356b3605d9b21_603	f0f6386fb62ec3a09e34ad652cf53efb_3374	S_aureus_10_00862
sufD		Fe-S cluster assembly protein SufD	4	4	1	1	2420				1307	1307	1307	0c5d6aed1d23427ac77815eabcecea75_1656	c4610aa9a2d5bacd833356b3605d9b21_1644	f0f6386fb62ec3a09e34ad652cf53efb_2329	S_aureus_10_00474
WP_001140697.1		phosphoglycerate mutase family protein	4	4	1	1	2401				560	581	575	0c5d6aed1d23427ac77815eabcecea75_1619	c4610aa9a2d5bacd833356b3605d9b21_1605	f0f6386fb62ec3a09e34ad652cf53efb_2366	S_aureus_10_00493
WP_000133304.1		phage terminase family protein	4	4	1	1	1080				1694	1694	1694	0c5d6aed1d23427ac77815eabcecea75_4101	c4610aa9a2d5bacd833356b3605d9b21_4100	f0f6386fb62ec3a09e34ad652cf53efb_3	S_aureus_10_02165
WP_000072283.1		sensor histidine kinase KdpD	4	4	1	1	1705				2657	2657	2657	0c5d6aed1d23427ac77815eabcecea75_4318	c4610aa9a2d5bacd833356b3605d9b21_4317	f0f6386fb62ec3a09e34ad652cf53efb_5283	S_aureus_10_02261
gatB		Asp-tRNA(Asn)/Glu-tRNA(Gln) amidotransferase subunit GatB	4	4	1	1	1478				1427	1427	1427	0c5d6aed1d23427ac77815eabcecea75_3953	c4610aa9a2d5bacd833356b3605d9b21_3952	f0f6386fb62ec3a09e34ad652cf53efb_151	S_aureus_10_02101
lysA		diaminopimelate decarboxylase	4	4	1	1	841				1265	1265	1265	0c5d6aed1d23427ac77815eabcecea75_2676	c4610aa9a2d5bacd833356b3605d9b21_2668	f0f6386fb62ec3a09e34ad652cf53efb_1305	S_aureus_10_02609
nrdD		anaerobic ribonucleoside-triphosphate reductase	4	4	1	1	479				1850	1850	1850	0c5d6aed1d23427ac77815eabcecea75_5445	c4610aa9a2d5bacd833356b3605d9b21_5442	f0f6386fb62ec3a09e34ad652cf53efb_4154	S_aureus_10_01250
carB		carbamoyl-phosphate synthase large subunit	4	4	1	1	2708				3173	3173	3173	0c5d6aed1d23427ac77815eabcecea75_2255	c4610aa9a2d5bacd833356b3605d9b21_2242	f0f6386fb62ec3a09e34ad652cf53efb_1726	S_aureus_10_00192
rsgA		ribosome small subunit-dependent GTPase A	4	4	1	1	2726				875	875	875	0c5d6aed1d23427ac77815eabcecea75_2291	c4610aa9a2d5bacd833356b3605d9b21_2278	f0f6386fb62ec3a09e34ad652cf53efb_1690	S_aureus_10_00174
WP_000849439.1		hypothetical protein	4	4	1	1	1278				1487	1487	1487	0c5d6aed1d23427ac77815eabcecea75_3268	c4610aa9a2d5bacd833356b3605d9b21_3261	f0f6386fb62ec3a09e34ad652cf53efb_709	S_aureus_10_01951
WP_023913465.1		YaiI/YqxD family protein	4	4	1	1	2278				458	458	458	0c5d6aed1d23427ac77815eabcecea75_1363	c4610aa9a2d5bacd833356b3605d9b21_1353	f0f6386fb62ec3a09e34ad652cf53efb_2620	S_aureus_10_00612
WP_001021468.1		adenylate kinase	4	4	1	1	1841				647	647	647	0c5d6aed1d23427ac77815eabcecea75_4632	c4610aa9a2d5bacd833356b3605d9b21_4627	f0f6386fb62ec3a09e34ad652cf53efb_4965	S_aureus_10_01822
mnhC1		Na+/H+ antiporter Mnh1 subunit C	4	4	1	1	2456				329	341	338	0c5d6aed1d23427ac77815eabcecea75_1730	c4610aa9a2d5bacd833356b3605d9b21_1718	f0f6386fb62ec3a09e34ad652cf53efb_2255	S_aureus_10_00439
WP_000620864.1		alpha/beta hydrolase	4	4	1	1	1963				920	920	920	0c5d6aed1d23427ac77815eabcecea75_4881	c4610aa9a2d5bacd833356b3605d9b21_4876	f0f6386fb62ec3a09e34ad652cf53efb_4716	S_aureus_10_01939
sbnI		bifunctional transcriptional regulator/O-phospho-L-serine synthase SbnI	4	4	1	1	669				764	764	764	0c5d6aed1d23427ac77815eabcecea75_199	c4610aa9a2d5bacd833356b3605d9b21_197	f0f6386fb62ec3a09e34ad652cf53efb_3794	S_aureus_10_01058
WP_000113262.1		Txe/YoeB family addiction module toxin	4	4	1	1	988				266	266	266	0c5d6aed1d23427ac77815eabcecea75_5001	c4610aa9a2d5bacd833356b3605d9b21_4996	f0f6386fb62ec3a09e34ad652cf53efb_4596	S_aureus_10_01455
WP_001032833.1		N-acetylglucosaminidase	4	4	1	1	1365				854	854	854	0c5d6aed1d23427ac77815eabcecea75_3445	c4610aa9a2d5bacd833356b3605d9b21_3438	f0f6386fb62ec3a09e34ad652cf53efb_532	S_aureus_10_02031
WP_001000058.1		hypothetical protein	4	4	1	1	1064				152	152	152	0c5d6aed1d23427ac77815eabcecea75_4069	c4610aa9a2d5bacd833356b3605d9b21_4068	f0f6386fb62ec3a09e34ad652cf53efb_35	S_aureus_10_02150
WP_000064778.1		amino acid permease	4	4	1	1	303				1322	1322	1322	0c5d6aed1d23427ac77815eabcecea75_2756	c4610aa9a2d5bacd833356b3605d9b21_2750	f0f6386fb62ec3a09e34ad652cf53efb_1225	S_aureus_10_01533
WP_000570687.1		alanine:cation symporter family protein	4	4	1	1	2517				1568	1568	1568	0c5d6aed1d23427ac77815eabcecea75_1852	c4610aa9a2d5bacd833356b3605d9b21_1840	f0f6386fb62ec3a09e34ad652cf53efb_2133	S_aureus_10_00378
WP_000149686.1		cysteine hydrolase	4	4	1	1	1457				560	560	560	0c5d6aed1d23427ac77815eabcecea75_3995	c4610aa9a2d5bacd833356b3605d9b21_3994	f0f6386fb62ec3a09e34ad652cf53efb_109	S_aureus_10_02121
WP_000163820.1		Gfo/Idh/MocA family oxidoreductase	4	4	1	1	757				1040	1040	1040	0c5d6aed1d23427ac77815eabcecea75_377	c4610aa9a2d5bacd833356b3605d9b21_373	f0f6386fb62ec3a09e34ad652cf53efb_3616	S_aureus_10_00971
nrdF		class 1b ribonucleoside-diphosphate reductase subunit beta	4	4	1	1	2329				971	971	971	0c5d6aed1d23427ac77815eabcecea75_1469	c4610aa9a2d5bacd833356b3605d9b21_1457	f0f6386fb62ec3a09e34ad652cf53efb_2514	S_aureus_10_00562
WP_000786734.1		ATP-binding cassette domain-containing protein	4	4	1	1	2494				941	962	946	0c5d6aed1d23427ac77815eabcecea75_1806	c4610aa9a2d5bacd833356b3605d9b21_1794	f0f6386fb62ec3a09e34ad652cf53efb_2179	S_aureus_10_00401
WP_000258714.1		aspartate kinase	4	4	1	1	834				1205	1205	1205	0c5d6aed1d23427ac77815eabcecea75_2662	c4610aa9a2d5bacd833356b3605d9b21_2654	f0f6386fb62ec3a09e34ad652cf53efb_1319	S_aureus_10_02616
sufB		Fe-S cluster assembly protein SufB	4	4	1	1	2423				1397	1397	1397	0c5d6aed1d23427ac77815eabcecea75_1662	c4610aa9a2d5bacd833356b3605d9b21_1650	f0f6386fb62ec3a09e34ad652cf53efb_2323	S_aureus_10_00471
WP_000259732.1		molybdopterin molybdotransferase MoeA	4	4	1	1	1886				1259	1259	1259	0c5d6aed1d23427ac77815eabcecea75_4724	c4610aa9a2d5bacd833356b3605d9b21_4719	f0f6386fb62ec3a09e34ad652cf53efb_4873	S_aureus_10_01865
[truncated: 850 more rows]

## Sheet: Column Info
Column	Column Name	Description
[truncated: 14 more rows]
