# Supplementary material for: Comparative De Novo and Pan-Genome Analysis of MDR Nosocomial Bacteria Isolated from Hospitals in Jeddah, Saudi Arabia
Source: MDPI journal article supplement (doi:10.3390/microorganisms11102432), 2023-09-28
Supplement: s1 [file Table S7 S._12 Copy of gene_presence_absence.xls]

## Sheet: Gene Presence Absence
Gene	Non-unique Gene name	Annotation	No. isolates	No. sequences	Avg sequences per isolate	Genome Fragment	Order within Fragment	Accessory Fragment	Accessory Order with Fragment	QC	Min group size nuc	Max group size nuc	Avg group size nuc	AP025683.1	CP047851.1	CP051990.1	S_aureus_12
QOB71464.1		IS1182 family transposase	4	12	3	1	774				197	1646	882	34e9a6678acca924fbf24c6bf5608d56_2205 34e9a6678acca924fbf24c6bf5608d56_4849	455a00a194b6732c15d9cd1ede6a821e_1414 455a00a194b6732c15d9cd1ede6a821e_1358 455a00a194b6732c15d9cd1ede6a821e_1424 455a00a194b6732c15d9cd1ede6a821e_4895	8aa1aaefd30e370458343f447b9298d5_1973 8aa1aaefd30e370458343f447b9298d5_4866	S_aureus_12_01704 S_aureus_12_02632 S_aureus_12_01705 S_aureus_12_00759
WP_001794249.1		hypothetical protein	4	4	1	1	2557				116	131	127	34e9a6678acca924fbf24c6bf5608d56_1944	455a00a194b6732c15d9cd1ede6a821e_1994	8aa1aaefd30e370458343f447b9298d5_2073	S_aureus_12_01659
WP_001171333.1		aldo/keto reductase	4	4	1	1	1493				908	908	908	34e9a6678acca924fbf24c6bf5608d56_3055	455a00a194b6732c15d9cd1ede6a821e_3126	8aa1aaefd30e370458343f447b9298d5_3031	S_aureus_12_01031
alr		alanine racemase	4	4	1	1	2818				1148	1148	1148	34e9a6678acca924fbf24c6bf5608d56_4248	455a00a194b6732c15d9cd1ede6a821e_4289	8aa1aaefd30e370458343f447b9298d5_4267	S_aureus_12_01966
WP_000079140.1		hypothetical protein	4	4	1	1	721				182	182	182	34e9a6678acca924fbf24c6bf5608d56_4957	455a00a194b6732c15d9cd1ede6a821e_5005	8aa1aaefd30e370458343f447b9298d5_4976	S_aureus_12_00811
WP_000987947.1		TIGR04197 family type VII secretion effector	4	4	1	1	543				278	278	278	34e9a6678acca924fbf24c6bf5608d56_5325	455a00a194b6732c15d9cd1ede6a821e_5367	8aa1aaefd30e370458343f447b9298d5_5348	S_aureus_12_00396
WP_000021872.1		TrkH family potassium uptake protein	4	4	1	1	2540				1358	1358	1358	34e9a6678acca924fbf24c6bf5608d56_1904	455a00a194b6732c15d9cd1ede6a821e_1954	8aa1aaefd30e370458343f447b9298d5_2031	S_aureus_12_01675
WP_000790531.1		hypothetical protein	4	4	1	1	1247				1544	1544	1544	34e9a6678acca924fbf24c6bf5608d56_219	455a00a194b6732c15d9cd1ede6a821e_190	8aa1aaefd30e370458343f447b9298d5_354	S_aureus_12_00240
WP_000678764.1		hypothetical protein	4	4	1	1	632				266	266	266	34e9a6678acca924fbf24c6bf5608d56_5141	455a00a194b6732c15d9cd1ede6a821e_5185	8aa1aaefd30e370458343f447b9298d5_5162	S_aureus_12_00310
WP_000805946.1		uroporphyrinogen-III synthase	4	4	1	1	273				668	668	668	34e9a6678acca924fbf24c6bf5608d56_3395	455a00a194b6732c15d9cd1ede6a821e_3462	8aa1aaefd30e370458343f447b9298d5_3363	S_aureus_12_02129
hutI		imidazolonepropionase	4	4	1	1	799				1238	1238	1238	34e9a6678acca924fbf24c6bf5608d56_4799	455a00a194b6732c15d9cd1ede6a821e_4845	8aa1aaefd30e370458343f447b9298d5_4816	S_aureus_12_00735
ruvX		Holliday junction resolvase RuvX	4	4	1	1	225				428	428	428	34e9a6678acca924fbf24c6bf5608d56_3292	455a00a194b6732c15d9cd1ede6a821e_3363	8aa1aaefd30e370458343f447b9298d5_3264	S_aureus_12_01147
WP_000867359.1		NINE protein	4	4	1	1	2558				215	290	233	34e9a6678acca924fbf24c6bf5608d56_1946	455a00a194b6732c15d9cd1ede6a821e_1996	8aa1aaefd30e370458343f447b9298d5_2075	S_aureus_12_01658
map		type I methionyl aminopeptidase	4	4	1	1	1063				758	758	758	34e9a6678acca924fbf24c6bf5608d56_3970	455a00a194b6732c15d9cd1ede6a821e_4056	8aa1aaefd30e370458343f447b9298d5_3936	S_aureus_12_02196
WP_001185204.1		hypothetical protein	4	4	1	1	802				569	569	569	34e9a6678acca924fbf24c6bf5608d56_4793	455a00a194b6732c15d9cd1ede6a821e_4839	8aa1aaefd30e370458343f447b9298d5_4810	S_aureus_12_00732
icaC		polysaccharide intercellular adhesin biosynthesis/export protein IcaC	4	4	1	1	454				1052	1052	1052	34e9a6678acca924fbf24c6bf5608d56_5505	455a00a194b6732c15d9cd1ede6a821e_5548	8aa1aaefd30e370458343f447b9298d5_5528	S_aureus_12_00478
mtaB		tRNA (N(6)-L-threonylcarbamoyladenosine(37)-C(2))-methylthiotransferase MtaB	4	4	1	1	1414				1346	1346	1346	34e9a6678acca924fbf24c6bf5608d56_3216	455a00a194b6732c15d9cd1ede6a821e_3287	8aa1aaefd30e370458343f447b9298d5_3190	S_aureus_12_01108
WP_000971554.1		pyridoxal phosphate-dependent aminotransferase family protein	4	4	1	1	699				1115	1115	1115	34e9a6678acca924fbf24c6bf5608d56_5003	455a00a194b6732c15d9cd1ede6a821e_5051	8aa1aaefd30e370458343f447b9298d5_5022	S_aureus_12_00832
nreA		nitrate respiration regulation accessory nitrate sensor NreA	4	4	1	1	732				452	452	452	34e9a6678acca924fbf24c6bf5608d56_4935	455a00a194b6732c15d9cd1ede6a821e_4983	8aa1aaefd30e370458343f447b9298d5_4954	S_aureus_12_00800
WP_000615467.1		amino acid ABC transporter ATP-binding protein	4	4	1	1	713				731	731	731	34e9a6678acca924fbf24c6bf5608d56_4975	455a00a194b6732c15d9cd1ede6a821e_5023	8aa1aaefd30e370458343f447b9298d5_4994	S_aureus_12_00819
group_1017	msrA	peptide-methionine (S)-S-oxide reductase MsrA	4	4	1	1	1681				533	533	533	34e9a6678acca924fbf24c6bf5608d56_2771	455a00a194b6732c15d9cd1ede6a821e_2856	8aa1aaefd30e370458343f447b9298d5_2875	S_aureus_12_00889
WP_000668339.1		hypothetical protein	4	4	1	1	2610				626	626	626	34e9a6678acca924fbf24c6bf5608d56_2057	455a00a194b6732c15d9cd1ede6a821e_2107	8aa1aaefd30e370458343f447b9298d5_2188	S_aureus_12_01605
ftsH		ATP-dependent zinc metalloprotease FtsH	4	4	1	1	2698				2093	2093	2093	34e9a6678acca924fbf24c6bf5608d56_932	455a00a194b6732c15d9cd1ede6a821e_978	8aa1aaefd30e370458343f447b9298d5_1063	S_aureus_12_02519
qoxD		cytochrome aa3 quinol oxidase subunit IV	4	4	1	1	2580				278	290	284	34e9a6678acca924fbf24c6bf5608d56_1986	455a00a194b6732c15d9cd1ede6a821e_2036	8aa1aaefd30e370458343f447b9298d5_2115	S_aureus_12_01639
WP_000202434.1		acyltransferase family protein	4	4	1	1	2572				1010	1010	1010	34e9a6678acca924fbf24c6bf5608d56_1970	455a00a194b6732c15d9cd1ede6a821e_2020	8aa1aaefd30e370458343f447b9298d5_2099	S_aureus_12_01646
WP_001127269.1		hypothetical protein	4	4	1	1	2301				314	314	314	34e9a6678acca924fbf24c6bf5608d56_1451	455a00a194b6732c15d9cd1ede6a821e_1554	8aa1aaefd30e370458343f447b9298d5_1583	S_aureus_12_01348
rplE		50S ribosomal protein L5	4	4	1	1	893				539	539	539	34e9a6678acca924fbf24c6bf5608d56_4610	455a00a194b6732c15d9cd1ede6a821e_4656	8aa1aaefd30e370458343f447b9298d5_4625	S_aureus_12_00645
modA		molybdate ABC transporter substrate-binding protein	4	4	1	1	850				782	782	782	34e9a6678acca924fbf24c6bf5608d56_4696	455a00a194b6732c15d9cd1ede6a821e_4742	8aa1aaefd30e370458343f447b9298d5_4711	S_aureus_12_00685
WP_000769690.1		MAP domain-containing protein	4	4	1	1	1958				434	434	434	34e9a6678acca924fbf24c6bf5608d56_1808	455a00a194b6732c15d9cd1ede6a821e_1861	8aa1aaefd30e370458343f447b9298d5_1936	S_aureus_12_02621
WP_000688492.1		LytTR family DNA-binding domain-containing protein	4	4	1	1	2784				716	716	716	34e9a6678acca924fbf24c6bf5608d56_4162	455a00a194b6732c15d9cd1ede6a821e_4206	8aa1aaefd30e370458343f447b9298d5_4184	S_aureus_12_02334
WP_000174583.1		DNA-binding protein	4	4	1	1	429				575	575	575	34e9a6678acca924fbf24c6bf5608d56_5553	455a00a194b6732c15d9cd1ede6a821e_5596	8aa1aaefd30e370458343f447b9298d5_5578	S_aureus_12_00503
leuD		3-isopropylmalate dehydratase small subunit	4	4	1	1	2807				572	572	572	34e9a6678acca924fbf24c6bf5608d56_4208	455a00a194b6732c15d9cd1ede6a821e_4252	8aa1aaefd30e370458343f447b9298d5_4230	S_aureus_12_02355
WP_000727423.1		YlxR family protein	4	4	1	1	1742				284	284	284	34e9a6678acca924fbf24c6bf5608d56_2418	455a00a194b6732c15d9cd1ede6a821e_2468	8aa1aaefd30e370458343f447b9298d5_2549	S_aureus_12_01751
WP_000006110.1		hypothetical protein	4	4	1	1	1801				185	185	185	34e9a6678acca924fbf24c6bf5608d56_2510	455a00a194b6732c15d9cd1ede6a821e_2590	8aa1aaefd30e370458343f447b9298d5_2641	S_aureus_12_01706
rnhC		ribonuclease HIII	4	4	1	1	2448				938	989	950	34e9a6678acca924fbf24c6bf5608d56_2153	455a00a194b6732c15d9cd1ede6a821e_2203	8aa1aaefd30e370458343f447b9298d5_2284	S_aureus_12_02485
WP_000793166.1		DUF3021 domain-containing protein	4	4	1	1	764				455	455	455	34e9a6678acca924fbf24c6bf5608d56_4871	455a00a194b6732c15d9cd1ede6a821e_4917	8aa1aaefd30e370458343f447b9298d5_4890	S_aureus_12_00769
WP_000180233.1		HD domain-containing protein	4	4	1	1	1360				1295	1295	1295	34e9a6678acca924fbf24c6bf5608d56_1173	455a00a194b6732c15d9cd1ede6a821e_1210	8aa1aaefd30e370458343f447b9298d5_1307	S_aureus_12_01481
WP_001092414.1		K(+)-transporting ATPase subunit C	4	4	1	1	2823				560	560	560	34e9a6678acca924fbf24c6bf5608d56_4258	455a00a194b6732c15d9cd1ede6a821e_4299	8aa1aaefd30e370458343f447b9298d5_4277	S_aureus_12_01971
WP_000974927.1		iron ABC transporter permease	4	4	1	1	2921				1031	1031	1031	34e9a6678acca924fbf24c6bf5608d56_4486	455a00a194b6732c15d9cd1ede6a821e_4529	8aa1aaefd30e370458343f447b9298d5_4505	S_aureus_12_00590
WP_001289711.1		N-acetyltransferase	4	4	1	1	2026				440	440	440	34e9a6678acca924fbf24c6bf5608d56_2232	455a00a194b6732c15d9cd1ede6a821e_2282	8aa1aaefd30e370458343f447b9298d5_2363	S_aureus_12_02567
WP_000781946.1		zinc-binding alcohol dehydrogenase family protein	4	4	1	1	2932				1007	1007	1007	34e9a6678acca924fbf24c6bf5608d56_4508	455a00a194b6732c15d9cd1ede6a821e_4551	8aa1aaefd30e370458343f447b9298d5_4527	S_aureus_12_00600
WP_001187612.1		HD domain-containing protein	4	4	1	1	2837				647	647	647	34e9a6678acca924fbf24c6bf5608d56_4288	455a00a194b6732c15d9cd1ede6a821e_4329	8aa1aaefd30e370458343f447b9298d5_4307	S_aureus_12_01984
WP_000250820.1		glycine C-acetyltransferase	4	4	1	1	2730				1187	1187	1187	34e9a6678acca924fbf24c6bf5608d56_1063	455a00a194b6732c15d9cd1ede6a821e_1104	8aa1aaefd30e370458343f447b9298d5_1199	S_aureus_12_01535
tig		trigger factor	4	4	1	1	6				1301	1301	1301	34e9a6678acca924fbf24c6bf5608d56_3407	455a00a194b6732c15d9cd1ede6a821e_3474	8aa1aaefd30e370458343f447b9298d5_3375	S_aureus_12_02123
xerD		site-specific tyrosine recombinase XerD	4	4	1	1	1496				887	887	887	34e9a6678acca924fbf24c6bf5608d56_3049	455a00a194b6732c15d9cd1ede6a821e_3120	8aa1aaefd30e370458343f447b9298d5_3025	S_aureus_12_01028
zapA		cell division protein ZapA	4	4	1	1	2449				259	266	262	34e9a6678acca924fbf24c6bf5608d56_2155	455a00a194b6732c15d9cd1ede6a821e_2205	8aa1aaefd30e370458343f447b9298d5_2286	S_aureus_12_02484
WP_000876825.1		IDEAL domain-containing protein	4	4	1	1	2543				218	218	218	34e9a6678acca924fbf24c6bf5608d56_1916	455a00a194b6732c15d9cd1ede6a821e_1966	8aa1aaefd30e370458343f447b9298d5_2043	S_aureus_12_01670
mspA		hypothetical protein	4	4	1	1	870				317	317	317	34e9a6678acca924fbf24c6bf5608d56_4656	455a00a194b6732c15d9cd1ede6a821e_4702	8aa1aaefd30e370458343f447b9298d5_4671	S_aureus_12_00666
WP_000551644.1		hypothetical protein	4	4	1	1	1231				536	536	536	34e9a6678acca924fbf24c6bf5608d56_721	455a00a194b6732c15d9cd1ede6a821e_763	8aa1aaefd30e370458343f447b9298d5_850	S_aureus_12_00001
WP_000731421.1		DUF1433 domain-containing protein	4	4	1	1	205				443	443	443	34e9a6678acca924fbf24c6bf5608d56_3681	455a00a194b6732c15d9cd1ede6a821e_3763	8aa1aaefd30e370458343f447b9298d5_3650	S_aureus_12_01890
WP_000999096.1		stage II sporulation protein M	4	4	1	1	2360				614	614	614	34e9a6678acca924fbf24c6bf5608d56_1549	455a00a194b6732c15d9cd1ede6a821e_1652	8aa1aaefd30e370458343f447b9298d5_1725	S_aureus_12_01277
WP_000660054.1		argininosuccinate synthase	4	4	1	1	2041				1205	1205	1205	34e9a6678acca924fbf24c6bf5608d56_1768	455a00a194b6732c15d9cd1ede6a821e_1821	8aa1aaefd30e370458343f447b9298d5_1896	S_aureus_12_01196
cap8O		type 8 capsular polysaccharide synthesis protein Cap8O	4	4	1	1	1840				1262	1262	1262	34e9a6678acca924fbf24c6bf5608d56_257	455a00a194b6732c15d9cd1ede6a821e_228	8aa1aaefd30e370458343f447b9298d5_392	S_aureus_12_00221
tadA		tRNA adenosine(34) deaminase TadA	4	4	1	1	2722				470	470	470	34e9a6678acca924fbf24c6bf5608d56_1079	455a00a194b6732c15d9cd1ede6a821e_1120	8aa1aaefd30e370458343f447b9298d5_1215	S_aureus_12_01527
WP_000044369.1		HAD-IIB family hydrolase	4	4	1	1	2952				815	815	815	34e9a6678acca924fbf24c6bf5608d56_4550	455a00a194b6732c15d9cd1ede6a821e_4593	8aa1aaefd30e370458343f447b9298d5_4567	S_aureus_12_00619
WP_000259736.1		molybdopterin molybdotransferase MoeA	4	4	1	1	856				1259	1259	1259	34e9a6678acca924fbf24c6bf5608d56_4684	455a00a194b6732c15d9cd1ede6a821e_4730	8aa1aaefd30e370458343f447b9298d5_4699	S_aureus_12_00679
WP_000049495.1		metallophosphoesterase	4	4	1	1	2461				485	503	498	34e9a6678acca924fbf24c6bf5608d56_2179	455a00a194b6732c15d9cd1ede6a821e_2229	8aa1aaefd30e370458343f447b9298d5_2310	S_aureus_12_02473
WP_000677718.1		ABC-2 transporter permease	4	4	1	1	323				629	629	629	34e9a6678acca924fbf24c6bf5608d56_641	455a00a194b6732c15d9cd1ede6a821e_637	8aa1aaefd30e370458343f447b9298d5_768	S_aureus_12_00038
WP_000367420.1		BrxA/BrxB family bacilliredoxin	4	4	1	1	1476				437	437	437	34e9a6678acca924fbf24c6bf5608d56_3091	455a00a194b6732c15d9cd1ede6a821e_3162	8aa1aaefd30e370458343f447b9298d5_3065	S_aureus_12_01048
WP_000887922.1		M20 family metallopeptidase	4	4	1	1	2731				1175	1175	1175	34e9a6678acca924fbf24c6bf5608d56_1061	455a00a194b6732c15d9cd1ede6a821e_1102	8aa1aaefd30e370458343f447b9298d5_1197	S_aureus_12_01536
WP_000649665.1		AAA family ATPase	4	4	1	1	1306				1700	1700	1700	34e9a6678acca924fbf24c6bf5608d56_99	455a00a194b6732c15d9cd1ede6a821e_70	8aa1aaefd30e370458343f447b9298d5_236	S_aureus_12_00298
yidC		membrane protein insertase YidC	4	4	1	1	2838				872	872	872	34e9a6678acca924fbf24c6bf5608d56_4292	455a00a194b6732c15d9cd1ede6a821e_4333	8aa1aaefd30e370458343f447b9298d5_4311	S_aureus_12_01985
fabG		3-oxoacyl-[acyl-carrier-protein] reductase	4	4	1	1	1705				734	734	734	34e9a6678acca924fbf24c6bf5608d56_2342	455a00a194b6732c15d9cd1ede6a821e_2392	8aa1aaefd30e370458343f447b9298d5_2473	S_aureus_12_01787
WP_000584395.1		hypothetical protein	4	4	1	1	2466				506	506	506	34e9a6678acca924fbf24c6bf5608d56_2189	455a00a194b6732c15d9cd1ede6a821e_2239	8aa1aaefd30e370458343f447b9298d5_2320	S_aureus_12_02470
WP_000697334.1		low molecular weight protein arginine phosphatase	4	4	1	1	2863				419	419	419	34e9a6678acca924fbf24c6bf5608d56_4341	455a00a194b6732c15d9cd1ede6a821e_4382	8aa1aaefd30e370458343f447b9298d5_4362	S_aureus_12_02010
rsmI		16S rRNA (cytidine(1402)-2'-O)-methyltransferase	4	4	1	1	2675				839	839	839	34e9a6678acca924fbf24c6bf5608d56_886	455a00a194b6732c15d9cd1ede6a821e_932	8aa1aaefd30e370458343f447b9298d5_1017	S_aureus_12_02541
WP_000413432.1		VOC family protein	4	4	1	1	1483				371	371	371	34e9a6678acca924fbf24c6bf5608d56_3075	455a00a194b6732c15d9cd1ede6a821e_3146	8aa1aaefd30e370458343f447b9298d5_3051	S_aureus_12_01040
flr		formyl peptide receptor-like 1 inhibitory protein	4	4	1	1	2465				386	410	392	34e9a6678acca924fbf24c6bf5608d56_2187	455a00a194b6732c15d9cd1ede6a821e_2237	8aa1aaefd30e370458343f447b9298d5_2318	S_aureus_12_02471
WP_000473654.1		PTS glucose transporter subunit IIA	4	4	1	1	1683				500	500	500	34e9a6678acca924fbf24c6bf5608d56_2767	455a00a194b6732c15d9cd1ede6a821e_2852	8aa1aaefd30e370458343f447b9298d5_2871	S_aureus_12_00887
WP_000143489.1		FMN-binding glutamate synthase family protein	4	4	1	1	662				1577	1577	1577	34e9a6678acca924fbf24c6bf5608d56_5079	455a00a194b6732c15d9cd1ede6a821e_5123	8aa1aaefd30e370458343f447b9298d5_5098	S_aureus_12_00866
WP_000953580.1		oxidoreductase	4	4	1	1	532				860	860	860	34e9a6678acca924fbf24c6bf5608d56_5349	455a00a194b6732c15d9cd1ede6a821e_5389	8aa1aaefd30e370458343f447b9298d5_5370	S_aureus_12_00407
WP_000161753.1		NAD(P)H-dependent glycerol-3-phosphate dehydrogenase	4	4	1	1	1635				998	998	998	34e9a6678acca924fbf24c6bf5608d56_2866	455a00a194b6732c15d9cd1ede6a821e_2951	8aa1aaefd30e370458343f447b9298d5_2970	S_aureus_12_00935
folP		dihydropteroate synthase	4	4	1	1	2701				803	803	803	34e9a6678acca924fbf24c6bf5608d56_938	455a00a194b6732c15d9cd1ede6a821e_984	8aa1aaefd30e370458343f447b9298d5_1069	S_aureus_12_02516
WP_000994677.1		YibE/F family protein	4	4	1	1	2654				782	782	782	34e9a6678acca924fbf24c6bf5608d56_827	455a00a194b6732c15d9cd1ede6a821e_873	8aa1aaefd30e370458343f447b9298d5_958	S_aureus_12_02237
addA		helicase-exonuclease AddAB subunit AddA	4	4	1	1	2047				3653	3653	3653	34e9a6678acca924fbf24c6bf5608d56_1780	455a00a194b6732c15d9cd1ede6a821e_1833	8aa1aaefd30e370458343f447b9298d5_1908	S_aureus_12_01190
WP_001246555.1		ABC transporter permease	4	4	1	1	2602				797	797	797	34e9a6678acca924fbf24c6bf5608d56_2073	455a00a194b6732c15d9cd1ede6a821e_2123	8aa1aaefd30e370458343f447b9298d5_2204	S_aureus_12_01597
rplR		50S ribosomal protein L18	4	4	1	1	897				359	359	359	34e9a6678acca924fbf24c6bf5608d56_4602	455a00a194b6732c15d9cd1ede6a821e_4648	8aa1aaefd30e370458343f447b9298d5_4617	S_aureus_12_00641
thrB		homoserine kinase	4	4	1	1	2493				914	914	914	34e9a6678acca924fbf24c6bf5608d56_2574	455a00a194b6732c15d9cd1ede6a821e_2660	8aa1aaefd30e370458343f447b9298d5_2679	S_aureus_12_02433
WP_000794663.1		superantigen-like protein SSL13	4	4	1	1	2036				677	725	713	34e9a6678acca924fbf24c6bf5608d56_2209	455a00a194b6732c15d9cd1ede6a821e_2259	8aa1aaefd30e370458343f447b9298d5_2340	S_aureus_12_02578
WP_000645611.1		galactitol-1-phosphate 5-dehydrogenase	4	4	1	1	1919				1043	1043	1043	34e9a6678acca924fbf24c6bf5608d56_423	455a00a194b6732c15d9cd1ede6a821e_392	8aa1aaefd30e370458343f447b9298d5_556	S_aureus_12_00143
WP_000684568.1		NAD/NADP-dependent octopine/nopaline dehydrogenase family protein	4	4	1	1	828				1082	1082	1082	34e9a6678acca924fbf24c6bf5608d56_4740	455a00a194b6732c15d9cd1ede6a821e_4786	8aa1aaefd30e370458343f447b9298d5_4757	S_aureus_12_00706
WP_000200947.1		QueT transporter family protein	4	4	1	1	701				467	467	467	34e9a6678acca924fbf24c6bf5608d56_4999	455a00a194b6732c15d9cd1ede6a821e_5047	8aa1aaefd30e370458343f447b9298d5_5018	S_aureus_12_00830
purR		pur operon repressor	4	4	1	1	2682				824	824	824	34e9a6678acca924fbf24c6bf5608d56_900	455a00a194b6732c15d9cd1ede6a821e_946	8aa1aaefd30e370458343f447b9298d5_1031	S_aureus_12_02534
WP_000659309.1		XTP/dITP diphosphatase	4	4	1	1	2460				587	587	587	34e9a6678acca924fbf24c6bf5608d56_2177	455a00a194b6732c15d9cd1ede6a821e_2227	8aa1aaefd30e370458343f447b9298d5_2308	S_aureus_12_02474
acsA		acetate--CoA ligase	4	4	1	1	66				1706	1706	1706	34e9a6678acca924fbf24c6bf5608d56_3531	455a00a194b6732c15d9cd1ede6a821e_3597	8aa1aaefd30e370458343f447b9298d5_3498	S_aureus_12_02068
WP_001173164.1		cation:dicarboxylase symporter family transporter	4	4	1	1	741				1277	1277	1277	34e9a6678acca924fbf24c6bf5608d56_4917	455a00a194b6732c15d9cd1ede6a821e_4965	8aa1aaefd30e370458343f447b9298d5_4936	S_aureus_12_00791
mqo		malate dehydrogenase (quinone)	4	4	1	1	525				1496	1496	1496	34e9a6678acca924fbf24c6bf5608d56_5363	455a00a194b6732c15d9cd1ede6a821e_5403	8aa1aaefd30e370458343f447b9298d5_5384	S_aureus_12_00414
thiE		thiamine phosphate synthase	4	4	1	1	2839				641	641	641	34e9a6678acca924fbf24c6bf5608d56_4294	455a00a194b6732c15d9cd1ede6a821e_4335	8aa1aaefd30e370458343f447b9298d5_4313	S_aureus_12_01986
WP_001154633.1		thiolase family protein	4	4	1	1	1940				1184	1184	1184	34e9a6678acca924fbf24c6bf5608d56_379	455a00a194b6732c15d9cd1ede6a821e_348	8aa1aaefd30e370458343f447b9298d5_512	S_aureus_12_00163
WP_000432070.1		YfcC family protein	4	4	1	1	2032				1490	1556	1539	34e9a6678acca924fbf24c6bf5608d56_2217	455a00a194b6732c15d9cd1ede6a821e_2267	8aa1aaefd30e370458343f447b9298d5_2348	S_aureus_12_02574
WP_000184231.1		hypothetical protein	4	4	1	1	778				638	638	638	34e9a6678acca924fbf24c6bf5608d56_4841	455a00a194b6732c15d9cd1ede6a821e_4887	8aa1aaefd30e370458343f447b9298d5_4858	S_aureus_12_00755
parE		DNA topoisomerase IV subunit B	4	4	1	1	2519				1991	1991	1991	34e9a6678acca924fbf24c6bf5608d56_2626	455a00a194b6732c15d9cd1ede6a821e_2712	8aa1aaefd30e370458343f447b9298d5_2731	S_aureus_12_02456
mnhA1		Na+/H+ antiporter Mnh1 subunit A	4	4	1	1	2233				2405	2405	2405	34e9a6678acca924fbf24c6bf5608d56_1750	455a00a194b6732c15d9cd1ede6a821e_1803	8aa1aaefd30e370458343f447b9298d5_1878	S_aureus_12_01205
WP_000134779.1		DUF1292 domain-containing protein	4	4	1	1	224				308	308	308	34e9a6678acca924fbf24c6bf5608d56_3290	455a00a194b6732c15d9cd1ede6a821e_3361	8aa1aaefd30e370458343f447b9298d5_3262	S_aureus_12_01146
cntK		histidine racemase CntK	4	4	1	1	652				821	821	821	34e9a6678acca924fbf24c6bf5608d56_5099	455a00a194b6732c15d9cd1ede6a821e_5143	8aa1aaefd30e370458343f447b9298d5_5118	S_aureus_12_00876
ligA		NAD-dependent DNA ligase LigA	4	4	1	1	1082				2003	2003	2003	34e9a6678acca924fbf24c6bf5608d56_4008	455a00a194b6732c15d9cd1ede6a821e_4094	8aa1aaefd30e370458343f447b9298d5_3974	S_aureus_12_02180
WP_000872158.1		DUF177 domain-containing protein	4	4	1	1	2214				557	557	557	34e9a6678acca924fbf24c6bf5608d56_2125	455a00a194b6732c15d9cd1ede6a821e_2175	8aa1aaefd30e370458343f447b9298d5_2256	S_aureus_12_01572
argR		transcriptional regulator ArgR	4	4	1	1	1470				452	452	452	34e9a6678acca924fbf24c6bf5608d56_3103	455a00a194b6732c15d9cd1ede6a821e_3174	8aa1aaefd30e370458343f447b9298d5_3077	S_aureus_12_01054
WP_001177186.1		hypothetical protein	4	4	1	1	596				203	203	203	34e9a6678acca924fbf24c6bf5608d56_5217	455a00a194b6732c15d9cd1ede6a821e_5259	8aa1aaefd30e370458343f447b9298d5_5240	S_aureus_12_00345
WP_000469818.1		XRE family transcriptional regulator	4	4	1	1	1824				1175	1175	1175	34e9a6678acca924fbf24c6bf5608d56_225	455a00a194b6732c15d9cd1ede6a821e_196	8aa1aaefd30e370458343f447b9298d5_360	S_aureus_12_00237
rsmH		16S rRNA (cytosine(1402)-N(4))-methyltransferase RsmH	4	4	1	1	1370				914	935	924	34e9a6678acca924fbf24c6bf5608d56_2238	455a00a194b6732c15d9cd1ede6a821e_2288	8aa1aaefd30e370458343f447b9298d5_2369	S_aureus_12_02564
WP_000049150.1		amino acid permease	4	4	1	1	13				1493	1493	1493	34e9a6678acca924fbf24c6bf5608d56_3422	455a00a194b6732c15d9cd1ede6a821e_3489	8aa1aaefd30e370458343f447b9298d5_3390	S_aureus_12_02117
tdcB		bifunctional threonine ammonia-lyase/L-serine ammonia-lyase TdcB	4	4	1	1	1668				1040	1040	1040	34e9a6678acca924fbf24c6bf5608d56_2797	455a00a194b6732c15d9cd1ede6a821e_2882	8aa1aaefd30e370458343f447b9298d5_2901	S_aureus_12_00901
WP_001062938.1		ribonuclease HI family protein	4	4	1	1	1672				401	401	401	34e9a6678acca924fbf24c6bf5608d56_2789	455a00a194b6732c15d9cd1ede6a821e_2874	8aa1aaefd30e370458343f447b9298d5_2893	S_aureus_12_00897
WP_000460983.1		GGDEF domain-containing protein	4	4	1	1	2310				1070	1070	1070	34e9a6678acca924fbf24c6bf5608d56_1469	455a00a194b6732c15d9cd1ede6a821e_1572	8aa1aaefd30e370458343f447b9298d5_1601	S_aureus_12_01339
WP_000455258.1		uracil-DNA glycosylase	4	4	1	1	1316				656	656	656	34e9a6678acca924fbf24c6bf5608d56_1123	455a00a194b6732c15d9cd1ede6a821e_1162	8aa1aaefd30e370458343f447b9298d5_1259	S_aureus_12_01505
rpsO		30S ribosomal protein S15	4	4	1	1	1748				269	269	269	34e9a6678acca924fbf24c6bf5608d56_2430	455a00a194b6732c15d9cd1ede6a821e_2480	8aa1aaefd30e370458343f447b9298d5_2561	S_aureus_12_01745
WP_000735863.1		homoserine dehydrogenase	4	4	1	1	2491				1280	1280	1280	34e9a6678acca924fbf24c6bf5608d56_2570	455a00a194b6732c15d9cd1ede6a821e_2656	8aa1aaefd30e370458343f447b9298d5_2675	S_aureus_12_02431
WP_000733283.1		BlaZ family penicillin-hydrolyzing class A beta-lactamase PC1	4	4	1	1	115				845	845	845	34e9a6678acca924fbf24c6bf5608d56_5610	455a00a194b6732c15d9cd1ede6a821e_3641	8aa1aaefd30e370458343f447b9298d5_123	S_aureus_12_02646
queA		tRNA preQ1(34) S-adenosylmethionine ribosyltransferase-isomerase QueA	4	4	1	1	249				1025	1025	1025	34e9a6678acca924fbf24c6bf5608d56_3343	455a00a194b6732c15d9cd1ede6a821e_3414	8aa1aaefd30e370458343f447b9298d5_3315	S_aureus_12_01170
WP_000922328.1		GntR family transcriptional regulator	4	4	1	1	1904				704	704	704	34e9a6678acca924fbf24c6bf5608d56_453	455a00a194b6732c15d9cd1ede6a821e_422	8aa1aaefd30e370458343f447b9298d5_586	S_aureus_12_00128
WP_229953199.1		hypothetical protein	4	6	1.5	1	1257				92	665	432	34e9a6678acca924fbf24c6bf5608d56_197 34e9a6678acca924fbf24c6bf5608d56_199	455a00a194b6732c15d9cd1ede6a821e_168 455a00a194b6732c15d9cd1ede6a821e_170	8aa1aaefd30e370458343f447b9298d5_334	S_aureus_12_00250
pgeF		peptidoglycan editing factor PgeF	4	4	1	1	1378				716	791	772	34e9a6678acca924fbf24c6bf5608d56_2254	455a00a194b6732c15d9cd1ede6a821e_2304	8aa1aaefd30e370458343f447b9298d5_2385	S_aureus_12_02556
pcrA		DNA helicase PcrA	4	4	1	1	1083				2192	2192	2192	34e9a6678acca924fbf24c6bf5608d56_4010	455a00a194b6732c15d9cd1ede6a821e_4096	8aa1aaefd30e370458343f447b9298d5_3976	S_aureus_12_02179
WP_000514290.1		TrkA family potassium uptake protein	4	4	1	1	2615				662	662	662	34e9a6678acca924fbf24c6bf5608d56_2047	455a00a194b6732c15d9cd1ede6a821e_2097	8aa1aaefd30e370458343f447b9298d5_2178	S_aureus_12_01609
ispE		4-(cytidine 5'-diphospho)-2-C-methyl-D-erythritol kinase	4	4	1	1	2681				848	848	848	34e9a6678acca924fbf24c6bf5608d56_898	455a00a194b6732c15d9cd1ede6a821e_944	8aa1aaefd30e370458343f447b9298d5_1029	S_aureus_12_02535
WP_000619920.1		DUF1433 domain-containing protein	4	4	1	1	208				449	449	449	34e9a6678acca924fbf24c6bf5608d56_3689	455a00a194b6732c15d9cd1ede6a821e_3773	8aa1aaefd30e370458343f447b9298d5_3658	S_aureus_12_01894
WP_000923514.1		ATP-binding cassette domain-containing protein	4	4	1	1	667				662	662	662	34e9a6678acca924fbf24c6bf5608d56_5069	455a00a194b6732c15d9cd1ede6a821e_5117	8aa1aaefd30e370458343f447b9298d5_5088	S_aureus_12_00861
WP_000545116.1		hypothetical protein	4	4	1	1	2089				299	299	299	34e9a6678acca924fbf24c6bf5608d56_1329	455a00a194b6732c15d9cd1ede6a821e_1432	8aa1aaefd30e370458343f447b9298d5_1463	S_aureus_12_01407
WP_000842865.1		DUF1129 family protein	4	4	1	1	2092				689	689	689	34e9a6678acca924fbf24c6bf5608d56_1323	455a00a194b6732c15d9cd1ede6a821e_1426	8aa1aaefd30e370458343f447b9298d5_1457	S_aureus_12_01410
sarV		HTH-type transcriptional regulator SarV	4	4	1	1	863				350	350	350	34e9a6678acca924fbf24c6bf5608d56_4670	455a00a194b6732c15d9cd1ede6a821e_4716	8aa1aaefd30e370458343f447b9298d5_4685	S_aureus_12_00673
WP_001059079.1		cold-shock protein	4	4	1	1	418				200	200	200	34e9a6678acca924fbf24c6bf5608d56_5575	455a00a194b6732c15d9cd1ede6a821e_5618	8aa1aaefd30e370458343f447b9298d5_5600	S_aureus_12_00514
rnc		ribonuclease III	4	4	1	1	1707				731	731	731	34e9a6678acca924fbf24c6bf5608d56_2346	455a00a194b6732c15d9cd1ede6a821e_2396	8aa1aaefd30e370458343f447b9298d5_2477	S_aureus_12_01785
QOB71659.1		RNA-binding protein	4	4	1	1	1382				779	806	792	34e9a6678acca924fbf24c6bf5608d56_2262	455a00a194b6732c15d9cd1ede6a821e_2312	8aa1aaefd30e370458343f447b9298d5_2393	S_aureus_12_02552
WP_000170603.1		YktB family protein	4	4	1	1	2194				614	614	614	34e9a6678acca924fbf24c6bf5608d56_2085	455a00a194b6732c15d9cd1ede6a821e_2135	8aa1aaefd30e370458343f447b9298d5_2216	S_aureus_12_01591
WP_000752909.1		CsbD family protein	4	4	1	1	234				182	182	182	34e9a6678acca924fbf24c6bf5608d56_3310	455a00a194b6732c15d9cd1ede6a821e_3381	8aa1aaefd30e370458343f447b9298d5_3282	S_aureus_12_01156
WP_000157627.1		YeiH family protein	4	4	1	1	334				995	995	995	34e9a6678acca924fbf24c6bf5608d56_619	455a00a194b6732c15d9cd1ede6a821e_615	8aa1aaefd30e370458343f447b9298d5_746	S_aureus_12_00049
WP_000521533.1		ABC transporter permease	4	4	1	1	1963				926	926	926	34e9a6678acca924fbf24c6bf5608d56_1818	455a00a194b6732c15d9cd1ede6a821e_1871	8aa1aaefd30e370458343f447b9298d5_1946	S_aureus_12_02616
rpsG		30S ribosomal protein S7	4	4	1	1	2734				470	470	470	34e9a6678acca924fbf24c6bf5608d56_1055	455a00a194b6732c15d9cd1ede6a821e_1096	8aa1aaefd30e370458343f447b9298d5_1191	S_aureus_12_01539
WP_000547794.1		NupC/NupG family nucleoside CNT transporter	4	4	1	1	2760				1214	1214	1214	34e9a6678acca924fbf24c6bf5608d56_1002	455a00a194b6732c15d9cd1ede6a821e_1043	8aa1aaefd30e370458343f447b9298d5_1136	S_aureus_12_01564
WP_000589241.1		ABC transporter ATP-binding protein	4	4	1	1	2284				977	977	977	34e9a6678acca924fbf24c6bf5608d56_1417	455a00a194b6732c15d9cd1ede6a821e_1520	8aa1aaefd30e370458343f447b9298d5_1551	S_aureus_12_01364
tenA		thiaminase II	4	4	1	1	2843				689	689	689	34e9a6678acca924fbf24c6bf5608d56_4300	455a00a194b6732c15d9cd1ede6a821e_4341	8aa1aaefd30e370458343f447b9298d5_4319	S_aureus_12_01989
WP_000011542.1		DUF2179 domain-containing protein	4	4	1	1	1090				602	602	602	34e9a6678acca924fbf24c6bf5608d56_4024	455a00a194b6732c15d9cd1ede6a821e_4110	8aa1aaefd30e370458343f447b9298d5_3990	S_aureus_12_02172
WP_000395156.1		monovalent cation:proton antiporter family protein	4	4	1	1	389				1844	1844	1844	34e9a6678acca924fbf24c6bf5608d56_1873	455a00a194b6732c15d9cd1ede6a821e_1924	8aa1aaefd30e370458343f447b9298d5_2001	S_aureus_12_01690
WP_001117066.1		DivIVA domain-containing protein	4	4	1	1	1383				596	617	611	34e9a6678acca924fbf24c6bf5608d56_2264	455a00a194b6732c15d9cd1ede6a821e_2314	8aa1aaefd30e370458343f447b9298d5_2395	S_aureus_12_02551
nirD		nitrite reductase small subunit NirD	4	4	1	1	726				314	314	314	34e9a6678acca924fbf24c6bf5608d56_4947	455a00a194b6732c15d9cd1ede6a821e_4995	8aa1aaefd30e370458343f447b9298d5_4966	S_aureus_12_00806
argH		argininosuccinate lyase	4	4	1	1	2040				1379	1379	1379	34e9a6678acca924fbf24c6bf5608d56_1766	455a00a194b6732c15d9cd1ede6a821e_1819	8aa1aaefd30e370458343f447b9298d5_1894	S_aureus_12_01197
tyrS		tyrosine--tRNA ligase	4	4	1	1	61				1262	1262	1262	34e9a6678acca924fbf24c6bf5608d56_3521	455a00a194b6732c15d9cd1ede6a821e_3587	8aa1aaefd30e370458343f447b9298d5_3488	S_aureus_12_02072
WP_000031108.1		hypothetical protein	4	4	1	1	3021				152	152	152	34e9a6678acca924fbf24c6bf5608d56_3809	455a00a194b6732c15d9cd1ede6a821e_3898	8aa1aaefd30e370458343f447b9298d5_3778	S_aureus_12_01949
WP_001051856.1		YtxH domain-containing protein	4	4	1	1	152				422	422	422	34e9a6678acca924fbf24c6bf5608d56_3573	455a00a194b6732c15d9cd1ede6a821e_3651	8aa1aaefd30e370458343f447b9298d5_3542	S_aureus_12_01838
WP_000481410.1		gluconate:H+ symporter	4	4	1	1	627				1358	1358	1358	34e9a6678acca924fbf24c6bf5608d56_5153	455a00a194b6732c15d9cd1ede6a821e_5195	8aa1aaefd30e370458343f447b9298d5_5176	S_aureus_12_00315
WP_000616191.1		tandem-type lipoprotein	4	4	1	1	638				794	794	794	34e9a6678acca924fbf24c6bf5608d56_5129	455a00a194b6732c15d9cd1ede6a821e_5173	8aa1aaefd30e370458343f447b9298d5_5150	S_aureus_12_00304
pknB		serine/threonine protein kinase Stk1	4	4	1	1	1694				1994	1994	1994	34e9a6678acca924fbf24c6bf5608d56_2320	455a00a194b6732c15d9cd1ede6a821e_2370	8aa1aaefd30e370458343f447b9298d5_2451	S_aureus_12_01798
rplQ		50S ribosomal protein L17	4	4	1	1	2966				368	368	368	34e9a6678acca924fbf24c6bf5608d56_4580	455a00a194b6732c15d9cd1ede6a821e_4626	8aa1aaefd30e370458343f447b9298d5_4595	S_aureus_12_00630
WP_001141929.1		2-oxoacid:ferredoxin oxidoreductase subunit beta	4	4	1	1	1765				866	866	866	34e9a6678acca924fbf24c6bf5608d56_2464	455a00a194b6732c15d9cd1ede6a821e_2514	8aa1aaefd30e370458343f447b9298d5_2595	S_aureus_12_01728
fapR		transcription factor FapR	4	4	1	1	1702				557	572	568	34e9a6678acca924fbf24c6bf5608d56_2336	455a00a194b6732c15d9cd1ede6a821e_2386	8aa1aaefd30e370458343f447b9298d5_2467	S_aureus_12_01790
icaB		intercellular adhesin biosynthesis polysaccharide N-deacetylase	4	4	1	1	455				872	872	872	34e9a6678acca924fbf24c6bf5608d56_5503	455a00a194b6732c15d9cd1ede6a821e_5546	8aa1aaefd30e370458343f447b9298d5_5526	S_aureus_12_00477
WP_001159764.1		hypothetical protein	4	4	1	1	1895				392	392	392	34e9a6678acca924fbf24c6bf5608d56_473	455a00a194b6732c15d9cd1ede6a821e_442	8aa1aaefd30e370458343f447b9298d5_606	S_aureus_12_00120
WP_000141110.1		lipoate--protein ligase family protein	4	4	1	1	1458				830	830	830	34e9a6678acca924fbf24c6bf5608d56_3127	455a00a194b6732c15d9cd1ede6a821e_3198	8aa1aaefd30e370458343f447b9298d5_3101	S_aureus_12_01066
WP_000928413.1		TerC family protein	4	4	1	1	2538				803	803	803	34e9a6678acca924fbf24c6bf5608d56_1900	455a00a194b6732c15d9cd1ede6a821e_1950	8aa1aaefd30e370458343f447b9298d5_2027	S_aureus_12_01677
aroB		3-dehydroquinate synthase	4	4	1	1	1642				1064	1064	1064	34e9a6678acca924fbf24c6bf5608d56_2852	455a00a194b6732c15d9cd1ede6a821e_2937	8aa1aaefd30e370458343f447b9298d5_2956	S_aureus_12_00928
rpmF		50S ribosomal protein L32	4	4	1	1	2215				173	173	173	34e9a6678acca924fbf24c6bf5608d56_2127	455a00a194b6732c15d9cd1ede6a821e_2177	8aa1aaefd30e370458343f447b9298d5_2258	S_aureus_12_01571
hutH		histidine ammonia-lyase	4	4	1	1	2141				1514	1514	1514	34e9a6678acca924fbf24c6bf5608d56_17	455a00a194b6732c15d9cd1ede6a821e_17	8aa1aaefd30e370458343f447b9298d5_17	S_aureus_12_00531
WP_001016166.1		aspartate carbamoyltransferase catalytic subunit	4	4	1	1	1816				881	881	881	34e9a6678acca924fbf24c6bf5608d56_2280	455a00a194b6732c15d9cd1ede6a821e_2330	8aa1aaefd30e370458343f447b9298d5_2411	S_aureus_12_01818
WP_000147093.1		metal-dependent hydrolase	4	4	1	1	2917				515	515	515	34e9a6678acca924fbf24c6bf5608d56_4478	455a00a194b6732c15d9cd1ede6a821e_4521	8aa1aaefd30e370458343f447b9298d5_4497	S_aureus_12_00586
mutL		DNA mismatch repair endonuclease MutL	4	4	1	1	1771				2009	2009	2009	34e9a6678acca924fbf24c6bf5608d56_2476	455a00a194b6732c15d9cd1ede6a821e_2526	8aa1aaefd30e370458343f447b9298d5_2607	S_aureus_12_01722
WP_000035759.1		DNA translocase FtsK	4	4	1	1	1751				2243	2369	2337	34e9a6678acca924fbf24c6bf5608d56_2436	455a00a194b6732c15d9cd1ede6a821e_2486	8aa1aaefd30e370458343f447b9298d5_2567	S_aureus_12_01742
WP_000451775.1		DUF5085 family protein	4	4	1	1	287				455	455	455	34e9a6678acca924fbf24c6bf5608d56_511	455a00a194b6732c15d9cd1ede6a821e_482	8aa1aaefd30e370458343f447b9298d5_644	S_aureus_12_00101
WP_000095328.1		adenylosuccinate synthase	4	4	1	1	2150				1283	1283	1283	34e9a6678acca924fbf24c6bf5608d56_37	455a00a194b6732c15d9cd1ede6a821e_37	8aa1aaefd30e370458343f447b9298d5_37	S_aureus_12_00540
WP_000064778.1		amino acid permease	4	4	1	1	1669				1322	1322	1322	34e9a6678acca924fbf24c6bf5608d56_2795	455a00a194b6732c15d9cd1ede6a821e_2880	8aa1aaefd30e370458343f447b9298d5_2899	S_aureus_12_00900
WP_000748756.1		arginine repressor	4	4	1	1	488				449	449	449	34e9a6678acca924fbf24c6bf5608d56_5439	455a00a194b6732c15d9cd1ede6a821e_5479	8aa1aaefd30e370458343f447b9298d5_5460	S_aureus_12_00444
trxA		thioredoxin	4	4	1	1	2453				314	314	314	34e9a6678acca924fbf24c6bf5608d56_2163	455a00a194b6732c15d9cd1ede6a821e_2213	8aa1aaefd30e370458343f447b9298d5_2294	S_aureus_12_02480
vraR		two-component system response regulator VraR	4	4	1	1	1059				629	629	629	34e9a6678acca924fbf24c6bf5608d56_3962	455a00a194b6732c15d9cd1ede6a821e_4048	8aa1aaefd30e370458343f447b9298d5_3928	S_aureus_12_02200
WP_000882071.1		UvrB/UvrC motif-containing protein	4	4	1	1	2758				566	566	566	34e9a6678acca924fbf24c6bf5608d56_1006	455a00a194b6732c15d9cd1ede6a821e_1047	8aa1aaefd30e370458343f447b9298d5_1140	S_aureus_12_01562
WP_000379825.1		acetyltransferase	4	4	1	1	561				1811	1811	1811	34e9a6678acca924fbf24c6bf5608d56_5287	455a00a194b6732c15d9cd1ede6a821e_5329	8aa1aaefd30e370458343f447b9298d5_5310	S_aureus_12_00378
WP_000088437.1		osmotic stress response protein	4	4	1	1	2577				470	470	470	34e9a6678acca924fbf24c6bf5608d56_1980	455a00a194b6732c15d9cd1ede6a821e_2030	8aa1aaefd30e370458343f447b9298d5_2109	S_aureus_12_01642
dnaG		DNA primase	4	4	1	1	1428				1799	1799	1799	34e9a6678acca924fbf24c6bf5608d56_3188	455a00a194b6732c15d9cd1ede6a821e_3259	8aa1aaefd30e370458343f447b9298d5_3162	S_aureus_12_01094
WP_000163520.1		aspartate-semialdehyde dehydrogenase	4	4	1	1	1996				989	989	989	34e9a6678acca924fbf24c6bf5608d56_2707	455a00a194b6732c15d9cd1ede6a821e_2792	8aa1aaefd30e370458343f447b9298d5_2811	S_aureus_12_02388
WP_000571253.1		dipeptide/oligopeptide/nickel ABC transporter ATP-binding protein	4	4	1	1	2011				701	701	701	34e9a6678acca924fbf24c6bf5608d56_2676	455a00a194b6732c15d9cd1ede6a821e_2762	8aa1aaefd30e370458343f447b9298d5_2781	S_aureus_12_02374
WP_001019343.1		acetyl-CoA carboxylase biotin carboxyl carrier protein subunit	4	4	1	1	216				449	449	449	34e9a6678acca924fbf24c6bf5608d56_3274	455a00a194b6732c15d9cd1ede6a821e_3345	8aa1aaefd30e370458343f447b9298d5_3246	S_aureus_12_01138
WP_000538761.1		DUF420 domain-containing protein	4	4	1	1	2205				461	461	461	34e9a6678acca924fbf24c6bf5608d56_2107	455a00a194b6732c15d9cd1ede6a821e_2157	8aa1aaefd30e370458343f447b9298d5_2238	S_aureus_12_01581
fumC		class II fumarate hydratase	4	4	1	1	3009				1385	1385	1385	34e9a6678acca924fbf24c6bf5608d56_3805	455a00a194b6732c15d9cd1ede6a821e_3894	8aa1aaefd30e370458343f447b9298d5_3774	S_aureus_12_01947
WP_000258649.1		diglucosyl diacylglycerol synthase	4	4	1	1	2534				1175	1175	1175	34e9a6678acca924fbf24c6bf5608d56_1891	455a00a194b6732c15d9cd1ede6a821e_1942	8aa1aaefd30e370458343f447b9298d5_2019	S_aureus_12_01681
WP_000426912.1		IreB family regulatory phosphoprotein	4	4	1	1	226				260	260	260	34e9a6678acca924fbf24c6bf5608d56_3294	455a00a194b6732c15d9cd1ede6a821e_3365	8aa1aaefd30e370458343f447b9298d5_3266	S_aureus_12_01148
gmk		guanylate kinase	4	4	1	1	1807				623	623	623	34e9a6678acca924fbf24c6bf5608d56_2298	455a00a194b6732c15d9cd1ede6a821e_2348	8aa1aaefd30e370458343f447b9298d5_2429	S_aureus_12_01809
rpsA		30S ribosomal protein S1	4	4	1	1	1633				1175	1175	1175	34e9a6678acca924fbf24c6bf5608d56_2870	455a00a194b6732c15d9cd1ede6a821e_2955	8aa1aaefd30e370458343f447b9298d5_2974	S_aureus_12_00937
WP_000620864.1		alpha/beta hydrolase	4	4	1	1	779				920	920	920	34e9a6678acca924fbf24c6bf5608d56_4839	455a00a194b6732c15d9cd1ede6a821e_4885	8aa1aaefd30e370458343f447b9298d5_4856	S_aureus_12_00754
WP_000289212.1		MarR family transcriptional regulator	4	4	1	1	739				446	446	446	34e9a6678acca924fbf24c6bf5608d56_4921	455a00a194b6732c15d9cd1ede6a821e_4969	8aa1aaefd30e370458343f447b9298d5_4940	S_aureus_12_00793
WP_001093552.1		DM13 domain-containing protein	4	4	1	1	2059				440	440	440	34e9a6678acca924fbf24c6bf5608d56_1389	455a00a194b6732c15d9cd1ede6a821e_1492	8aa1aaefd30e370458343f447b9298d5_1523	S_aureus_12_01377
fdhF		formate dehydrogenase subunit alpha	4	4	1	1	820				2954	2954	2954	34e9a6678acca924fbf24c6bf5608d56_4756	455a00a194b6732c15d9cd1ede6a821e_4802	8aa1aaefd30e370458343f447b9298d5_4773	S_aureus_12_00714
radA		DNA repair protein RadA	4	4	1	1	2755				1364	1364	1364	34e9a6678acca924fbf24c6bf5608d56_1012	455a00a194b6732c15d9cd1ede6a821e_1053	8aa1aaefd30e370458343f447b9298d5_1148	S_aureus_12_01559
purS		phosphoribosylformylglycinamidine synthase subunit PurS	4	4	1	1	2590				263	263	263	34e9a6678acca924fbf24c6bf5608d56_2006	455a00a194b6732c15d9cd1ede6a821e_2056	8aa1aaefd30e370458343f447b9298d5_2135	S_aureus_12_01629
WP_000323171.1		SLC13 family permease	4	4	1	1	1096				1562	1562	1562	34e9a6678acca924fbf24c6bf5608d56_4036	455a00a194b6732c15d9cd1ede6a821e_4122	8aa1aaefd30e370458343f447b9298d5_4002	S_aureus_12_02167
group_1166	phnE	phosphonate ABC transporter, permease protein PhnE	4	4	1	1	1251				815	815	815	34e9a6678acca924fbf24c6bf5608d56_211	455a00a194b6732c15d9cd1ede6a821e_182	8aa1aaefd30e370458343f447b9298d5_346	S_aureus_12_00244
WP_000907329.1		GNAT family N-acetyltransferase	4	4	1	1	756				515	515	515	34e9a6678acca924fbf24c6bf5608d56_4887	455a00a194b6732c15d9cd1ede6a821e_4933	8aa1aaefd30e370458343f447b9298d5_4906	S_aureus_12_00777
sarA		global transcriptional regulator SarA	4	4	1	1	1347				374	374	374	34e9a6678acca924fbf24c6bf5608d56_1201	455a00a194b6732c15d9cd1ede6a821e_1238	8aa1aaefd30e370458343f447b9298d5_1335	S_aureus_12_01468
WP_000966288.1		hypothetical protein	4	4	1	1	1108				524	524	524	34e9a6678acca924fbf24c6bf5608d56_4060	455a00a194b6732c15d9cd1ede6a821e_4146	8aa1aaefd30e370458343f447b9298d5_4026	S_aureus_12_02156
rpmG		50S ribosomal protein L33	4	4	1	1	2499				149	149	149	34e9a6678acca924fbf24c6bf5608d56_2586	455a00a194b6732c15d9cd1ede6a821e_2672	8aa1aaefd30e370458343f447b9298d5_2691	S_aureus_12_02438
WP_000874686.1		DUF1398 family protein	4	4	1	1	327				389	389	389	34e9a6678acca924fbf24c6bf5608d56_633	455a00a194b6732c15d9cd1ede6a821e_629	8aa1aaefd30e370458343f447b9298d5_760	S_aureus_12_00042
WP_001186908.1		ECF transporter S component	4	4	1	1	1622				545	545	545	34e9a6678acca924fbf24c6bf5608d56_2892	455a00a194b6732c15d9cd1ede6a821e_2977	8aa1aaefd30e370458343f447b9298d5_2996	S_aureus_12_00945
WP_001241200.1		glycosyltransferase family 2 protein	4	4	1	1	1132				1061	1061	1061	34e9a6678acca924fbf24c6bf5608d56_1249	455a00a194b6732c15d9cd1ede6a821e_1286	8aa1aaefd30e370458343f447b9298d5_1383	S_aureus_12_01444
argS		arginine--tRNA ligase	4	4	1	1	1356				1661	1661	1661	34e9a6678acca924fbf24c6bf5608d56_1183	455a00a194b6732c15d9cd1ede6a821e_1220	8aa1aaefd30e370458343f447b9298d5_1317	S_aureus_12_01477
nirB		nitrite reductase large subunit NirB	4	4	1	1	725				2405	2405	2405	34e9a6678acca924fbf24c6bf5608d56_4949	455a00a194b6732c15d9cd1ede6a821e_4997	8aa1aaefd30e370458343f447b9298d5_4968	S_aureus_12_00807
rpmJ		50S ribosomal protein L36	4	4	1	1	904				113	113	113	34e9a6678acca924fbf24c6bf5608d56_4588	455a00a194b6732c15d9cd1ede6a821e_4634	8aa1aaefd30e370458343f447b9298d5_4603	S_aureus_12_00634
WP_000633782.1		flavodoxin family protein	4	4	1	1	1362				536	536	536	34e9a6678acca924fbf24c6bf5608d56_1169	455a00a194b6732c15d9cd1ede6a821e_1206	8aa1aaefd30e370458343f447b9298d5_1303	S_aureus_12_01483
WP_000162804.1		DsbA family protein	4	4	1	1	716				599	599	599	34e9a6678acca924fbf24c6bf5608d56_4969	455a00a194b6732c15d9cd1ede6a821e_5017	8aa1aaefd30e370458343f447b9298d5_4988	S_aureus_12_00816
WP_000052330.1		ABC transporter ATP-binding protein	4	4	1	1	2010				773	773	773	34e9a6678acca924fbf24c6bf5608d56_2678	455a00a194b6732c15d9cd1ede6a821e_2764	8aa1aaefd30e370458343f447b9298d5_2783	S_aureus_12_02375
WP_000610203.1		ribitol-5-phosphate dehydrogenase	4	4	1	1	1913				1025	1025	1025	34e9a6678acca924fbf24c6bf5608d56_435	455a00a194b6732c15d9cd1ede6a821e_404	8aa1aaefd30e370458343f447b9298d5_568	S_aureus_12_00137
WP_223200474.1		CAP domain-containing protein	4	4	1	1	2503				863	977	920	34e9a6678acca924fbf24c6bf5608d56_2594	455a00a194b6732c15d9cd1ede6a821e_2680	8aa1aaefd30e370458343f447b9298d5_2699	S_aureus_12_02441
WP_001283612.1		redox-sensing transcriptional repressor Rex	4	4	1	1	2791				635	635	635	34e9a6678acca924fbf24c6bf5608d56_4176	455a00a194b6732c15d9cd1ede6a821e_4220	8aa1aaefd30e370458343f447b9298d5_4198	S_aureus_12_02341
dhaL		dihydroxyacetone kinase subunit L	4	4	1	1	1143				584	584	584	34e9a6678acca924fbf24c6bf5608d56_1271	455a00a194b6732c15d9cd1ede6a821e_1308	8aa1aaefd30e370458343f447b9298d5_1405	S_aureus_12_01434
WP_001191871.1		DUF1361 domain-containing protein	4	4	1	1	2074				617	617	617	34e9a6678acca924fbf24c6bf5608d56_1359	455a00a194b6732c15d9cd1ede6a821e_1462	8aa1aaefd30e370458343f447b9298d5_1493	S_aureus_12_01392
WP_001103747.1		aquaporin family protein	4	4	1	1	1773				818	818	818	34e9a6678acca924fbf24c6bf5608d56_2480	455a00a194b6732c15d9cd1ede6a821e_2530	8aa1aaefd30e370458343f447b9298d5_2611	S_aureus_12_01720
WP_000066177.1		DUF5082 family protein	4	4	1	1	284				395	395	395	34e9a6678acca924fbf24c6bf5608d56_505	455a00a194b6732c15d9cd1ede6a821e_476	8aa1aaefd30e370458343f447b9298d5_638	S_aureus_12_00104
dltD		D-alanyl-lipoteichoic acid biosynthesis protein DltD	4	4	1	1	2250				1175	1175	1175	34e9a6678acca924fbf24c6bf5608d56_1716	455a00a194b6732c15d9cd1ede6a821e_1769	8aa1aaefd30e370458343f447b9298d5_1844	S_aureus_12_01222
WP_000011688.1		hypothetical protein	4	4	1	1	522				212	212	212	34e9a6678acca924fbf24c6bf5608d56_5371	455a00a194b6732c15d9cd1ede6a821e_5411	8aa1aaefd30e370458343f447b9298d5_5392	S_aureus_12_00417
WP_000080025.1		response regulator transcription factor	4	4	1	1	25				701	701	701	34e9a6678acca924fbf24c6bf5608d56_3447	455a00a194b6732c15d9cd1ede6a821e_3513	8aa1aaefd30e370458343f447b9298d5_3414	S_aureus_12_02106
cspA		cold shock protein CspA	4	4	1	1	1988				200	200	200	34e9a6678acca924fbf24c6bf5608d56_2723	455a00a194b6732c15d9cd1ede6a821e_2808	8aa1aaefd30e370458343f447b9298d5_2827	S_aureus_12_02396
cidA		holin-like murein hydrolase modulator CidA	4	4	1	1	588				395	395	395	34e9a6678acca924fbf24c6bf5608d56_5233	455a00a194b6732c15d9cd1ede6a821e_5275	8aa1aaefd30e370458343f447b9298d5_5256	S_aureus_12_00353
WP_000246909.1		YneF family protein	4	4	1	1	2508				242	287	253	34e9a6678acca924fbf24c6bf5608d56_2604	455a00a194b6732c15d9cd1ede6a821e_2690	8aa1aaefd30e370458343f447b9298d5_2709	S_aureus_12_02446
rplC		50S ribosomal protein L3	4	4	1	1	881				662	662	662	34e9a6678acca924fbf24c6bf5608d56_4634	455a00a194b6732c15d9cd1ede6a821e_4680	8aa1aaefd30e370458343f447b9298d5_4649	S_aureus_12_00657
WP_001244301.1		hypothetical protein	4	4	1	1	1459				218	218	218	34e9a6678acca924fbf24c6bf5608d56_3125	455a00a194b6732c15d9cd1ede6a821e_3196	8aa1aaefd30e370458343f447b9298d5_3099	S_aureus_12_01065
WP_000717395.1		CHAP domain-containing protein	4	4	1	1	831				809	809	809	34e9a6678acca924fbf24c6bf5608d56_4734	455a00a194b6732c15d9cd1ede6a821e_4780	8aa1aaefd30e370458343f447b9298d5_4751	S_aureus_12_00704
WP_000273356.1		thymidine kinase	4	4	1	1	2867				599	599	599	34e9a6678acca924fbf24c6bf5608d56_4349	455a00a194b6732c15d9cd1ede6a821e_4390	8aa1aaefd30e370458343f447b9298d5_4370	S_aureus_12_02014
ggt		gamma-glutamyltransferase	4	4	1	1	1878				2006	2006	2006	34e9a6678acca924fbf24c6bf5608d56_333	455a00a194b6732c15d9cd1ede6a821e_304	8aa1aaefd30e370458343f447b9298d5_468	S_aureus_12_00183
WP_000792417.1		septum formation initiator family protein	4	4	1	1	2694				392	392	392	34e9a6678acca924fbf24c6bf5608d56_924	455a00a194b6732c15d9cd1ede6a821e_970	8aa1aaefd30e370458343f447b9298d5_1055	S_aureus_12_02523
isaB		immunodominant staphylococcal antigen IsaB	4	4	1	1	486				527	527	527	34e9a6678acca924fbf24c6bf5608d56_5443	455a00a194b6732c15d9cd1ede6a821e_5483	8aa1aaefd30e370458343f447b9298d5_5464	S_aureus_12_00446
hrcA		heat-inducible transcriptional repressor HrcA	4	4	1	1	1408				977	977	977	34e9a6678acca924fbf24c6bf5608d56_3228	455a00a194b6732c15d9cd1ede6a821e_3299	8aa1aaefd30e370458343f447b9298d5_3202	S_aureus_12_01114
WP_000102741.1		replication-associated recombination protein A	4	4	1	1	236				1274	1274	1274	34e9a6678acca924fbf24c6bf5608d56_3314	455a00a194b6732c15d9cd1ede6a821e_3385	8aa1aaefd30e370458343f447b9298d5_3286	S_aureus_12_01158
WP_000776010.1		DNA-binding protein	4	4	1	1	2073				422	422	422	34e9a6678acca924fbf24c6bf5608d56_1361	455a00a194b6732c15d9cd1ede6a821e_1464	8aa1aaefd30e370458343f447b9298d5_1495	S_aureus_12_01391
WP_000477931.1		ABC transporter permease	4	5	1.25	1	368				212	1049	839	34e9a6678acca924fbf24c6bf5608d56_551	455a00a194b6732c15d9cd1ede6a821e_547 455a00a194b6732c15d9cd1ede6a821e_509	8aa1aaefd30e370458343f447b9298d5_678	S_aureus_12_00083
aroE		shikimate dehydrogenase	4	4	1	1	1395				806	806	806	34e9a6678acca924fbf24c6bf5608d56_3254	455a00a194b6732c15d9cd1ede6a821e_3325	8aa1aaefd30e370458343f447b9298d5_3226	S_aureus_12_01127
WP_000843621.1		nucleotidyltransferase	4	4	1	1	2213				1139	1139	1139	34e9a6678acca924fbf24c6bf5608d56_2123	455a00a194b6732c15d9cd1ede6a821e_2173	8aa1aaefd30e370458343f447b9298d5_2254	S_aureus_12_01573
WP_000531319.1		putative DNA-binding protein	4	4	1	1	1710				332	332	332	34e9a6678acca924fbf24c6bf5608d56_2352	455a00a194b6732c15d9cd1ede6a821e_2402	8aa1aaefd30e370458343f447b9298d5_2483	S_aureus_12_01782
WP_000257888.1		DNA-dependent RNA polymerase auxiliary subunit epsilon family protein	4	4	1	1	2613				218	218	218	34e9a6678acca924fbf24c6bf5608d56_2051	455a00a194b6732c15d9cd1ede6a821e_2101	8aa1aaefd30e370458343f447b9298d5_2182	S_aureus_12_01607
WP_001253292.1		carbohydrate kinase	4	4	1	1	2785				959	959	959	34e9a6678acca924fbf24c6bf5608d56_4164	455a00a194b6732c15d9cd1ede6a821e_4208	8aa1aaefd30e370458343f447b9298d5_4186	S_aureus_12_02335
WP_000765183.1		DUF423 domain-containing protein	4	4	1	1	1318				368	368	368	34e9a6678acca924fbf24c6bf5608d56_1127	455a00a194b6732c15d9cd1ede6a821e_1166	8aa1aaefd30e370458343f447b9298d5_1263	S_aureus_12_01503
pstC		phosphate ABC transporter permease subunit PstC	4	4	1	1	2001				926	926	926	34e9a6678acca924fbf24c6bf5608d56_2696	455a00a194b6732c15d9cd1ede6a821e_2782	8aa1aaefd30e370458343f447b9298d5_2801	S_aureus_12_02383
WP_000675407.1		MFS transporter	4	4	1	1	660				1193	1193	1193	34e9a6678acca924fbf24c6bf5608d56_5083	455a00a194b6732c15d9cd1ede6a821e_5127	8aa1aaefd30e370458343f447b9298d5_5102	S_aureus_12_00868
WP_000287585.1		1-acyl-sn-glycerol-3-phosphate acyltransferase	4	4	1	1	59				617	617	617	34e9a6678acca924fbf24c6bf5608d56_3517	455a00a194b6732c15d9cd1ede6a821e_3583	8aa1aaefd30e370458343f447b9298d5_3484	S_aureus_12_02074
rplM		50S ribosomal protein L13	4	4	1	1	2961				437	437	437	34e9a6678acca924fbf24c6bf5608d56_4570	455a00a194b6732c15d9cd1ede6a821e_4613	8aa1aaefd30e370458343f447b9298d5_4585	S_aureus_12_00625
cozEb		cell elongation protein CozEb	4	4	1	1	2524				1148	1208	1193	34e9a6678acca924fbf24c6bf5608d56_2636	455a00a194b6732c15d9cd1ede6a821e_2722	8aa1aaefd30e370458343f447b9298d5_2741	S_aureus_12_02460
tpiA		triose-phosphate isomerase	4	4	1	1	2341				761	761	761	34e9a6678acca924fbf24c6bf5608d56_1530	455a00a194b6732c15d9cd1ede6a821e_1633	8aa1aaefd30e370458343f447b9298d5_1662	S_aureus_12_01308
WP_000198597.1		GbsR/MarR family transcriptional regulator	4	4	1	1	518				563	563	563	34e9a6678acca924fbf24c6bf5608d56_5379	455a00a194b6732c15d9cd1ede6a821e_5419	8aa1aaefd30e370458343f447b9298d5_5400	S_aureus_12_00420
WP_000009075.1		hypothetical protein	4	4	1	1	2623				1295	1295	1295	34e9a6678acca924fbf24c6bf5608d56_2031	455a00a194b6732c15d9cd1ede6a821e_2081	8aa1aaefd30e370458343f447b9298d5_2162	S_aureus_12_01617
WP_000926750.1		DoxX family protein	4	4	1	1	1298				371	371	371	34e9a6678acca924fbf24c6bf5608d56_109	455a00a194b6732c15d9cd1ede6a821e_80	8aa1aaefd30e370458343f447b9298d5_246	S_aureus_12_00294
WP_000382588.1		AMP-binding protein	4	4	1	1	2707				1376	1376	1376	34e9a6678acca924fbf24c6bf5608d56_1111	455a00a194b6732c15d9cd1ede6a821e_1150	8aa1aaefd30e370458343f447b9298d5_1247	S_aureus_12_01511
WP_000062636.1		cbb3-type cytochrome c oxidase subunit I	4	4	1	1	1905				2291	2291	2291	34e9a6678acca924fbf24c6bf5608d56_451	455a00a194b6732c15d9cd1ede6a821e_420	8aa1aaefd30e370458343f447b9298d5_584	S_aureus_12_00129
WP_000038530.1		hypothetical protein	4	4	1	1	2187				1523	1523	1523	34e9a6678acca924fbf24c6bf5608d56_487	455a00a194b6732c15d9cd1ede6a821e_456	8aa1aaefd30e370458343f447b9298d5_620	S_aureus_12_00113
hemB		porphobilinogen synthase	4	4	1	1	274				974	974	974	34e9a6678acca924fbf24c6bf5608d56_3393	455a00a194b6732c15d9cd1ede6a821e_3460	8aa1aaefd30e370458343f447b9298d5_3361	S_aureus_12_02130
WP_000638614.1		GNAT family N-acetyltransferase	4	4	1	1	2088				542	542	542	34e9a6678acca924fbf24c6bf5608d56_1331	455a00a194b6732c15d9cd1ede6a821e_1434	8aa1aaefd30e370458343f447b9298d5_1465	S_aureus_12_01406
WP_000394700.1		hypothetical protein	4	4	1	1	1225				662	662	662	34e9a6678acca924fbf24c6bf5608d56_708	455a00a194b6732c15d9cd1ede6a821e_750	8aa1aaefd30e370458343f447b9298d5_837	S_aureus_12_00007
WP_001000803.1		YppE family protein	4	4	1	1	1659				350	401	362	34e9a6678acca924fbf24c6bf5608d56_2818	455a00a194b6732c15d9cd1ede6a821e_2903	8aa1aaefd30e370458343f447b9298d5_2922	S_aureus_12_00911
WP_000433352.1		M42 family metallopeptidase	4	4	1	1	2022				1031	1031	1031	34e9a6678acca924fbf24c6bf5608d56_2652	455a00a194b6732c15d9cd1ede6a821e_2738	8aa1aaefd30e370458343f447b9298d5_2757	S_aureus_12_02362
WP_001059690.1		hypothetical protein	4	4	1	1	2375				260	260	260	34e9a6678acca924fbf24c6bf5608d56_1579	455a00a194b6732c15d9cd1ede6a821e_1682	8aa1aaefd30e370458343f447b9298d5_1755	S_aureus_12_01263
pyk		pyruvate kinase	4	4	1	1	29				1757	1757	1757	34e9a6678acca924fbf24c6bf5608d56_3455	455a00a194b6732c15d9cd1ede6a821e_3521	8aa1aaefd30e370458343f447b9298d5_3422	S_aureus_12_02102
WP_001095260.1		transcriptional repressor	4	4	1	1	1436				410	410	410	34e9a6678acca924fbf24c6bf5608d56_3172	455a00a194b6732c15d9cd1ede6a821e_3243	8aa1aaefd30e370458343f447b9298d5_3146	S_aureus_12_01086
WP_000248838.1		hypothetical protein	4	4	1	1	1212				152	152	152	34e9a6678acca924fbf24c6bf5608d56_731	455a00a194b6732c15d9cd1ede6a821e_773	8aa1aaefd30e370458343f447b9298d5_858	S_aureus_12_02283
WP_000571209.1		methionine ABC transporter ATP-binding protein	4	4	1	1	2390				1025	1025	1025	34e9a6678acca924fbf24c6bf5608d56_1610	455a00a194b6732c15d9cd1ede6a821e_1713	8aa1aaefd30e370458343f447b9298d5_1788	S_aureus_12_01248
WP_000019127.1		cation diffusion facilitator family transporter	4	4	1	1	707				866	866	866	34e9a6678acca924fbf24c6bf5608d56_4987	455a00a194b6732c15d9cd1ede6a821e_5035	8aa1aaefd30e370458343f447b9298d5_5006	S_aureus_12_00825
WP_001077828.1		energy-coupling factor transporter transmembrane protein EcfT	4	4	1	1	441				833	833	833	34e9a6678acca924fbf24c6bf5608d56_5529	455a00a194b6732c15d9cd1ede6a821e_5572	8aa1aaefd30e370458343f447b9298d5_5554	S_aureus_12_00491
norC		MFS transporter	4	4	1	1	1284				1388	1388	1388	34e9a6678acca924fbf24c6bf5608d56_141	455a00a194b6732c15d9cd1ede6a821e_112	8aa1aaefd30e370458343f447b9298d5_278	S_aureus_12_00278
WP_001228158.1		alpha/beta hydrolase	4	4	1	1	594				968	968	968	34e9a6678acca924fbf24c6bf5608d56_5221	455a00a194b6732c15d9cd1ede6a821e_5263	8aa1aaefd30e370458343f447b9298d5_5244	S_aureus_12_00347
recU		Holliday junction resolvase RecU	4	4	1	1	1658				626	677	638	34e9a6678acca924fbf24c6bf5608d56_2820	455a00a194b6732c15d9cd1ede6a821e_2905	8aa1aaefd30e370458343f447b9298d5_2924	S_aureus_12_00912
WP_000841344.1		thermonuclease family protein	4	4	1	1	2487				533	533	533	34e9a6678acca924fbf24c6bf5608d56_2562	455a00a194b6732c15d9cd1ede6a821e_2648	8aa1aaefd30e370458343f447b9298d5_2667	S_aureus_12_02427
WP_000437472.1		phosphocarrier protein HPr	4	4	1	1	2620				266	266	266	34e9a6678acca924fbf24c6bf5608d56_2037	455a00a194b6732c15d9cd1ede6a821e_2087	8aa1aaefd30e370458343f447b9298d5_2168	S_aureus_12_01614
WP_000706528.1		GTP-binding protein	4	4	1	1	548				890	890	890	34e9a6678acca924fbf24c6bf5608d56_5315	455a00a194b6732c15d9cd1ede6a821e_5357	8aa1aaefd30e370458343f447b9298d5_5338	S_aureus_12_00391
WP_001077683.1		GTP pyrophosphokinase family protein	4	4	1	1	393				635	635	635	34e9a6678acca924fbf24c6bf5608d56_1865	455a00a194b6732c15d9cd1ede6a821e_1916	8aa1aaefd30e370458343f447b9298d5_1993	S_aureus_12_01694
WP_000140043.1		ABC transporter ATP-binding protein	4	4	1	1	1965				1082	1082	1082	34e9a6678acca924fbf24c6bf5608d56_1822	455a00a194b6732c15d9cd1ede6a821e_1875	8aa1aaefd30e370458343f447b9298d5_1950	S_aureus_12_02614
lspA		signal peptidase II	4	4	1	1	1820				491	491	491	34e9a6678acca924fbf24c6bf5608d56_2272	455a00a194b6732c15d9cd1ede6a821e_2322	8aa1aaefd30e370458343f447b9298d5_2403	S_aureus_12_01822
WP_000819679.1		spermidine/putrescine ABC transporter substrate-binding protein	4	4	1	1	2190				1073	1073	1073	34e9a6678acca924fbf24c6bf5608d56_2077	455a00a194b6732c15d9cd1ede6a821e_2127	8aa1aaefd30e370458343f447b9298d5_2208	S_aureus_12_01595
WP_000160914.1		undecaprenyldiphospho-muramoylpentapeptide beta-N-acetylglucosaminyltransferase	4	4	1	1	1972				1070	1070	1070	34e9a6678acca924fbf24c6bf5608d56_2757	455a00a194b6732c15d9cd1ede6a821e_2842	8aa1aaefd30e370458343f447b9298d5_2861	S_aureus_12_02412
WP_000816182.1		TIGR01457 family HAD-type hydrolase	4	4	1	1	2257				779	779	779	34e9a6678acca924fbf24c6bf5608d56_1702	455a00a194b6732c15d9cd1ede6a821e_1755	8aa1aaefd30e370458343f447b9298d5_1830	S_aureus_12_01228
sigB		RNA polymerase sigma factor SigB	4	4	1	1	2812				770	770	770	34e9a6678acca924fbf24c6bf5608d56_4236	455a00a194b6732c15d9cd1ede6a821e_4277	8aa1aaefd30e370458343f447b9298d5_4255	S_aureus_12_01960
WP_001827022.1		zinc metallopeptidase	4	4	1	1	1647				680	698	684	34e9a6678acca924fbf24c6bf5608d56_2842	455a00a194b6732c15d9cd1ede6a821e_2927	8aa1aaefd30e370458343f447b9298d5_2946	S_aureus_12_00923
accD		acetyl-CoA carboxylase, carboxyltransferase subunit beta	4	4	1	1	32				857	857	857	34e9a6678acca924fbf24c6bf5608d56_3461	455a00a194b6732c15d9cd1ede6a821e_3527	8aa1aaefd30e370458343f447b9298d5_3428	S_aureus_12_02099
graX		auxiliary protein GraX/ApsX	4	4	1	1	1150				923	923	923	34e9a6678acca924fbf24c6bf5608d56_1285	455a00a194b6732c15d9cd1ede6a821e_1322	8aa1aaefd30e370458343f447b9298d5_1419	S_aureus_12_01427
aroC		chorismate synthase	4	4	1	1	1641				1166	1166	1166	34e9a6678acca924fbf24c6bf5608d56_2854	455a00a194b6732c15d9cd1ede6a821e_2939	8aa1aaefd30e370458343f447b9298d5_2958	S_aureus_12_00929
WP_000826658.1		ABC transporter substrate-binding protein	4	4	1	1	1849				974	974	974	34e9a6678acca924fbf24c6bf5608d56_275	455a00a194b6732c15d9cd1ede6a821e_246	8aa1aaefd30e370458343f447b9298d5_410	S_aureus_12_00212
WP_000669938.1		RluA family pseudouridine synthase	4	4	1	1	391				854	854	854	34e9a6678acca924fbf24c6bf5608d56_1869	455a00a194b6732c15d9cd1ede6a821e_1920	8aa1aaefd30e370458343f447b9298d5_1997	S_aureus_12_01692
hisS		histidine--tRNA ligase	4	4	1	1	240				1262	1262	1262	34e9a6678acca924fbf24c6bf5608d56_3325	455a00a194b6732c15d9cd1ede6a821e_3396	8aa1aaefd30e370458343f447b9298d5_3297	S_aureus_12_01161
WP_000919764.1		penicillin-binding protein 2	4	4	1	1	1438				2075	2075	2075	34e9a6678acca924fbf24c6bf5608d56_3168	455a00a194b6732c15d9cd1ede6a821e_3239	8aa1aaefd30e370458343f447b9298d5_3142	S_aureus_12_01084
WP_000904065.1		hypothetical protein	4	4	1	1	807				530	530	530	34e9a6678acca924fbf24c6bf5608d56_4782	455a00a194b6732c15d9cd1ede6a821e_4828	8aa1aaefd30e370458343f447b9298d5_4799	S_aureus_12_00727
WP_000071351.1		DUF896 domain-containing protein	4	4	1	1	2506				239	239	239	34e9a6678acca924fbf24c6bf5608d56_2600	455a00a194b6732c15d9cd1ede6a821e_2686	8aa1aaefd30e370458343f447b9298d5_2705	S_aureus_12_02444
WP_001060938.1		aldehyde reductase	4	4	1	1	347				1025	1025	1025	34e9a6678acca924fbf24c6bf5608d56_595	455a00a194b6732c15d9cd1ede6a821e_591	8aa1aaefd30e370458343f447b9298d5_722	S_aureus_12_00062
WP_000005208.1		YpiB family protein	4	4	1	1	1645				575	617	585	34e9a6678acca924fbf24c6bf5608d56_2846	455a00a194b6732c15d9cd1ede6a821e_2931	8aa1aaefd30e370458343f447b9298d5_2950	S_aureus_12_00925
sbnI		bifunctional transcriptional regulator/O-phospho-L-serine synthase SbnI	4	4	1	1	1266				764	764	764	34e9a6678acca924fbf24c6bf5608d56_177	455a00a194b6732c15d9cd1ede6a821e_148	8aa1aaefd30e370458343f447b9298d5_314	S_aureus_12_00260
WP_001175769.1		aminotransferase class IV	4	4	1	1	2052				608	608	608	34e9a6678acca924fbf24c6bf5608d56_1403	455a00a194b6732c15d9cd1ede6a821e_1506	8aa1aaefd30e370458343f447b9298d5_1537	S_aureus_12_01370
WP_001224184.1		TetR/AcrR family transcriptional regulator	4	4	1	1	552				557	557	557	34e9a6678acca924fbf24c6bf5608d56_5307	455a00a194b6732c15d9cd1ede6a821e_5349	8aa1aaefd30e370458343f447b9298d5_5330	S_aureus_12_00387
pfkA		6-phosphofructokinase	4	4	1	1	30				968	968	968	34e9a6678acca924fbf24c6bf5608d56_3457	455a00a194b6732c15d9cd1ede6a821e_3523	8aa1aaefd30e370458343f447b9298d5_3424	S_aureus_12_02101
spxA		transcriptional regulator SpxA	4	4	1	1	401				395	395	395	34e9a6678acca924fbf24c6bf5608d56_1849	455a00a194b6732c15d9cd1ede6a821e_1900	8aa1aaefd30e370458343f447b9298d5_1977	S_aureus_12_01702
pdxS		pyridoxal 5'-phosphate synthase lyase subunit PdxS	4	4	1	1	2762				887	887	887	34e9a6678acca924fbf24c6bf5608d56_998	455a00a194b6732c15d9cd1ede6a821e_1039	8aa1aaefd30e370458343f447b9298d5_1132	S_aureus_12_01566
WP_000954654.1		metal-dependent transcriptional regulator	4	4	1	1	1126				644	644	644	34e9a6678acca924fbf24c6bf5608d56_1237	455a00a194b6732c15d9cd1ede6a821e_1274	8aa1aaefd30e370458343f447b9298d5_1371	S_aureus_12_01450
WP_000491382.1		DUF3147 family protein	4	4	1	1	415				353	353	353	34e9a6678acca924fbf24c6bf5608d56_5581	455a00a194b6732c15d9cd1ede6a821e_5624	8aa1aaefd30e370458343f447b9298d5_5606	S_aureus_12_00517
WP_001574560.1		DUF5067 domain-containing protein	4	4	1	1	2361				728	728	728	34e9a6678acca924fbf24c6bf5608d56_1551	455a00a194b6732c15d9cd1ede6a821e_1654	8aa1aaefd30e370458343f447b9298d5_1727	S_aureus_12_01276
WP_000617706.1		hypothetical protein	4	4	1	1	2978				236	236	236	34e9a6678acca924fbf24c6bf5608d56_3723	455a00a194b6732c15d9cd1ede6a821e_3812	8aa1aaefd30e370458343f447b9298d5_3692	S_aureus_12_01909
WP_001183424.1		DUF309 domain-containing protein	4	4	1	1	1497				506	506	506	34e9a6678acca924fbf24c6bf5608d56_3047	455a00a194b6732c15d9cd1ede6a821e_3118	8aa1aaefd30e370458343f447b9298d5_3023	S_aureus_12_01027
crcB		fluoride efflux transporter CrcB	4	4	1	1	182				365	365	365	34e9a6678acca924fbf24c6bf5608d56_3634	455a00a194b6732c15d9cd1ede6a821e_3714	8aa1aaefd30e370458343f447b9298d5_3603	S_aureus_12_01868
WP_000819843.1		DUF4467 domain-containing protein	4	4	1	1	715				362	362	362	34e9a6678acca924fbf24c6bf5608d56_4971	455a00a194b6732c15d9cd1ede6a821e_5019	8aa1aaefd30e370458343f447b9298d5_4990	S_aureus_12_00817
def		peptide deformylase	4	4	1	1	2611				551	551	551	34e9a6678acca924fbf24c6bf5608d56_2055	455a00a194b6732c15d9cd1ede6a821e_2105	8aa1aaefd30e370458343f447b9298d5_2186	S_aureus_12_01606
acpS		holo-ACP synthase	4	4	1	1	2819				359	359	359	34e9a6678acca924fbf24c6bf5608d56_4250	455a00a194b6732c15d9cd1ede6a821e_4291	8aa1aaefd30e370458343f447b9298d5_4269	S_aureus_12_01967
WP_000205307.1		hypothetical protein	4	4	1	1	811				185	185	185	34e9a6678acca924fbf24c6bf5608d56_4774	455a00a194b6732c15d9cd1ede6a821e_4820	8aa1aaefd30e370458343f447b9298d5_4791	S_aureus_12_00723
WP_000251928.1		Txe/YoeB family addiction module toxin	4	4	1	1	718				266	266	266	34e9a6678acca924fbf24c6bf5608d56_4963	455a00a194b6732c15d9cd1ede6a821e_5011	8aa1aaefd30e370458343f447b9298d5_4982	S_aureus_12_00814
WP_000224620.1		CYTH domain-containing protein	4	4	1	1	395				593	593	593	34e9a6678acca924fbf24c6bf5608d56_1861	455a00a194b6732c15d9cd1ede6a821e_1912	8aa1aaefd30e370458343f447b9298d5_1989	S_aureus_12_01696
WP_001152695.1		competence protein ComK	4	4	1	1	176				443	443	443	34e9a6678acca924fbf24c6bf5608d56_3622	455a00a194b6732c15d9cd1ede6a821e_3702	8aa1aaefd30e370458343f447b9298d5_3591	S_aureus_12_01862
WP_000690411.1		sugar phosphate isomerase/epimerase	4	4	1	1	1887				968	968	968	34e9a6678acca924fbf24c6bf5608d56_351	455a00a194b6732c15d9cd1ede6a821e_322	8aa1aaefd30e370458343f447b9298d5_486	S_aureus_12_00174
QOB71949.1		DUF1672 domain-containing protein	4	4	1	1	1620				908	920	917	34e9a6678acca924fbf24c6bf5608d56_2897	455a00a194b6732c15d9cd1ede6a821e_2982	8aa1aaefd30e370458343f447b9298d5_3001	S_aureus_12_00946
dnaX		DNA polymerase III subunit gamma/tau	4	4	1	1	2664				1697	1697	1697	34e9a6678acca924fbf24c6bf5608d56_853	455a00a194b6732c15d9cd1ede6a821e_899	8aa1aaefd30e370458343f447b9298d5_984	S_aureus_12_02227
dnaN		DNA polymerase III subunit beta	4	4	1	1	2135				1133	1133	1133	34e9a6678acca924fbf24c6bf5608d56_5	455a00a194b6732c15d9cd1ede6a821e_5	8aa1aaefd30e370458343f447b9298d5_5	S_aureus_12_00525
WP_001279341.1		trypsin-like peptidase domain-containing protein	4	4	1	1	60				1274	1274	1274	34e9a6678acca924fbf24c6bf5608d56_3519	455a00a194b6732c15d9cd1ede6a821e_3585	8aa1aaefd30e370458343f447b9298d5_3486	S_aureus_12_02073
WP_000889252.1		metal ABC transporter permease	4	4	1	1	1124				836	836	836	34e9a6678acca924fbf24c6bf5608d56_1233	455a00a194b6732c15d9cd1ede6a821e_1270	8aa1aaefd30e370458343f447b9298d5_1367	S_aureus_12_01452
WP_000072622.1		restriction endonuclease subunit S	4	4	1	1	2968				1154	1154	1154	34e9a6678acca924fbf24c6bf5608d56_3697	455a00a194b6732c15d9cd1ede6a821e_3786	8aa1aaefd30e370458343f447b9298d5_3666	S_aureus_12_01898
WP_000649898.1		ABC transporter permease subunit	4	4	1	1	3016				1457	1457	1457	34e9a6678acca924fbf24c6bf5608d56_3819	455a00a194b6732c15d9cd1ede6a821e_3908	8aa1aaefd30e370458343f447b9298d5_3788	S_aureus_12_01954
crtI		phytoene desaturase family protein	4	4	1	1	567				1508	1508	1508	34e9a6678acca924fbf24c6bf5608d56_5275	455a00a194b6732c15d9cd1ede6a821e_5317	8aa1aaefd30e370458343f447b9298d5_5298	S_aureus_12_00372
WP_001015997.1		hypothetical protein	4	4	1	1	67				632	632	632	34e9a6678acca924fbf24c6bf5608d56_3533	455a00a194b6732c15d9cd1ede6a821e_3599	8aa1aaefd30e370458343f447b9298d5_3500	S_aureus_12_02067
rimP		ribosome maturation factor RimP	4	4	1	1	1740				467	467	467	34e9a6678acca924fbf24c6bf5608d56_2414	455a00a194b6732c15d9cd1ede6a821e_2464	8aa1aaefd30e370458343f447b9298d5_2545	S_aureus_12_01753
WP_000207101.1		AzlC family ABC transporter permease	4	4	1	1	2143				695	695	695	34e9a6678acca924fbf24c6bf5608d56_22	455a00a194b6732c15d9cd1ede6a821e_22	8aa1aaefd30e370458343f447b9298d5_22	S_aureus_12_00533
WP_001108545.1		M50 family metallopeptidase	4	4	1	1	1127				752	752	752	34e9a6678acca924fbf24c6bf5608d56_1239	455a00a194b6732c15d9cd1ede6a821e_1276	8aa1aaefd30e370458343f447b9298d5_1373	S_aureus_12_01449
secDF		protein translocase subunit SecDF	4	4	1	1	246				2279	2279	2279	34e9a6678acca924fbf24c6bf5608d56_3337	455a00a194b6732c15d9cd1ede6a821e_3408	8aa1aaefd30e370458343f447b9298d5_3309	S_aureus_12_01167
folB		dihydroneopterin aldolase	4	4	1	1	2702				365	365	365	34e9a6678acca924fbf24c6bf5608d56_940	455a00a194b6732c15d9cd1ede6a821e_986	8aa1aaefd30e370458343f447b9298d5_1071	S_aureus_12_02515
msaA		regulatory protein MsaA	4	4	1	1	1987				308	308	308	34e9a6678acca924fbf24c6bf5608d56_2725	455a00a194b6732c15d9cd1ede6a821e_2810	8aa1aaefd30e370458343f447b9298d5_2829	S_aureus_12_02397
WP_000153458.1		Gfo/Idh/MocA family oxidoreductase	4	4	1	1	1885				1076	1076	1076	34e9a6678acca924fbf24c6bf5608d56_347	455a00a194b6732c15d9cd1ede6a821e_318	8aa1aaefd30e370458343f447b9298d5_482	S_aureus_12_00176
WP_000620943.1		GNAT family N-acetyltransferase	4	4	1	1	2559				551	551	551	34e9a6678acca924fbf24c6bf5608d56_1948	455a00a194b6732c15d9cd1ede6a821e_1998	8aa1aaefd30e370458343f447b9298d5_2077	S_aureus_12_01657
WP_000732090.1		YehR family lipoprotein	4	4	1	1	663				455	455	455	34e9a6678acca924fbf24c6bf5608d56_5077	455a00a194b6732c15d9cd1ede6a821e_5121	8aa1aaefd30e370458343f447b9298d5_5096	S_aureus_12_00865
copZ		copper chaperone CopZ	4	4	1	1	570				206	206	206	34e9a6678acca924fbf24c6bf5608d56_5269	455a00a194b6732c15d9cd1ede6a821e_5311	8aa1aaefd30e370458343f447b9298d5_5292	S_aureus_12_00369
WP_001032820.1		hypothetical protein	4	4	1	1	2469				185	185	185	34e9a6678acca924fbf24c6bf5608d56_2195	455a00a194b6732c15d9cd1ede6a821e_2245	8aa1aaefd30e370458343f447b9298d5_2326	S_aureus_12_02467
lexA		transcriptional repressor LexA	4	4	1	1	2504				623	623	623	34e9a6678acca924fbf24c6bf5608d56_2596	455a00a194b6732c15d9cd1ede6a821e_2682	8aa1aaefd30e370458343f447b9298d5_2701	S_aureus_12_02442
noc		nucleoid occlusion protein	4	4	1	1	414				839	839	839	34e9a6678acca924fbf24c6bf5608d56_5583	455a00a194b6732c15d9cd1ede6a821e_5626	8aa1aaefd30e370458343f447b9298d5_5608	S_aureus_12_00518
deoB		phosphopentomutase	4	4	1	1	1252				1178	1178	1178	34e9a6678acca924fbf24c6bf5608d56_209	455a00a194b6732c15d9cd1ede6a821e_180	8aa1aaefd30e370458343f447b9298d5_344	S_aureus_12_00245
WP_000737711.1		hypothetical protein	4	4	1	1	757				629	629	629	34e9a6678acca924fbf24c6bf5608d56_4885	455a00a194b6732c15d9cd1ede6a821e_4931	8aa1aaefd30e370458343f447b9298d5_4904	S_aureus_12_00776
WP_000180659.1		2-oxoglutarate dehydrogenase E1 component	4	4	1	1	1977				2798	2798	2798	34e9a6678acca924fbf24c6bf5608d56_2745	455a00a194b6732c15d9cd1ede6a821e_2830	8aa1aaefd30e370458343f447b9298d5_2849	S_aureus_12_02407
WP_000020810.1		T7SS effector LXG polymorphic toxin	4	4	1	1	1367				1394	1394	1394	34e9a6678acca924fbf24c6bf5608d56_1157	455a00a194b6732c15d9cd1ede6a821e_1194	8aa1aaefd30e370458343f447b9298d5_1291	S_aureus_12_01490
mscL		large conductance mechanosensitive channel protein MscL	4	4	1	1	2513				362	362	362	34e9a6678acca924fbf24c6bf5608d56_2614	455a00a194b6732c15d9cd1ede6a821e_2700	8aa1aaefd30e370458343f447b9298d5_2719	S_aureus_12_02450
WP_000362975.1		alpha/beta hydrolase	4	4	1	1	1351				800	800	800	34e9a6678acca924fbf24c6bf5608d56_1193	455a00a194b6732c15d9cd1ede6a821e_1230	8aa1aaefd30e370458343f447b9298d5_1327	S_aureus_12_01472
hlgC		bi-component gamma-hemolysin HlgCB subunit C	4	4	1	1	703				947	947	947	34e9a6678acca924fbf24c6bf5608d56_4995	455a00a194b6732c15d9cd1ede6a821e_5043	8aa1aaefd30e370458343f447b9298d5_5014	S_aureus_12_00828
WP_000568358.1		thiamine pyrophosphate-dependent dehydrogenase E1 component subunit alpha	4	4	1	1	1473				992	992	992	34e9a6678acca924fbf24c6bf5608d56_3097	455a00a194b6732c15d9cd1ede6a821e_3168	8aa1aaefd30e370458343f447b9298d5_3071	S_aureus_12_01051
nrdE		class 1b ribonucleoside-diphosphate reductase subunit alpha	4	4	1	1	2295				2105	2105	2105	34e9a6678acca924fbf24c6bf5608d56_1439	455a00a194b6732c15d9cd1ede6a821e_1542	8aa1aaefd30e370458343f447b9298d5_1571	S_aureus_12_01354
WP_001822575.1		PTS sugar transporter subunit IIC	4	4	1	1	365				950	1031	989	34e9a6678acca924fbf24c6bf5608d56_557	455a00a194b6732c15d9cd1ede6a821e_553	8aa1aaefd30e370458343f447b9298d5_684	S_aureus_12_00081
WP_000432366.1		anion permease	4	4	1	1	431				1418	1418	1418	34e9a6678acca924fbf24c6bf5608d56_5549	455a00a194b6732c15d9cd1ede6a821e_5592	8aa1aaefd30e370458343f447b9298d5_5574	S_aureus_12_00501
msrA		peptide-methionine (S)-S-oxide reductase MsrA	4	4	1	1	2526				509	509	509	34e9a6678acca924fbf24c6bf5608d56_2640	455a00a194b6732c15d9cd1ede6a821e_2726	8aa1aaefd30e370458343f447b9298d5_2745	S_aureus_12_02462
WP_000505964.1		hypothetical protein	4	4	1	1	2621				542	542	542	34e9a6678acca924fbf24c6bf5608d56_2035	455a00a194b6732c15d9cd1ede6a821e_2085	8aa1aaefd30e370458343f447b9298d5_2166	S_aureus_12_01615
isdC		heme uptake protein IsdC	4	4	1	1	2438				683	683	683	34e9a6678acca924fbf24c6bf5608d56_2133	455a00a194b6732c15d9cd1ede6a821e_2183	8aa1aaefd30e370458343f447b9298d5_2264	S_aureus_12_02494
WP_000451830.1		Na+/H+ antiporter NhaC family protein	4	4	1	1	803				1310	1310	1310	34e9a6678acca924fbf24c6bf5608d56_4790	455a00a194b6732c15d9cd1ede6a821e_4836	8aa1aaefd30e370458343f447b9298d5_4807	S_aureus_12_00731
argF		ornithine carbamoyltransferase	4	4	1	1	2034				1001	1001	1001	34e9a6678acca924fbf24c6bf5608d56_2213	455a00a194b6732c15d9cd1ede6a821e_2263	8aa1aaefd30e370458343f447b9298d5_2344	S_aureus_12_02576
rplP		50S ribosomal protein L16	4	4	1	1	888				434	434	434	34e9a6678acca924fbf24c6bf5608d56_4620	455a00a194b6732c15d9cd1ede6a821e_4666	8aa1aaefd30e370458343f447b9298d5_4635	S_aureus_12_00650
WP_000567025.1		tetratricopeptide repeat protein	4	4	1	1	229				668	668	668	34e9a6678acca924fbf24c6bf5608d56_3300	455a00a194b6732c15d9cd1ede6a821e_3371	8aa1aaefd30e370458343f447b9298d5_3272	S_aureus_12_01151
purN		phosphoribosylglycinamide formyltransferase	4	4	1	1	2595				566	566	566	34e9a6678acca924fbf24c6bf5608d56_2016	455a00a194b6732c15d9cd1ede6a821e_2066	8aa1aaefd30e370458343f447b9298d5_2145	S_aureus_12_01624
WP_000927626.1		sulfite exporter TauE/SafE family protein	4	4	1	1	2263				827	827	827	34e9a6678acca924fbf24c6bf5608d56_1690	455a00a194b6732c15d9cd1ede6a821e_1743	8aa1aaefd30e370458343f447b9298d5_1818	S_aureus_12_01234
fmt		methionyl-tRNA formyltransferase	4	4	1	1	1690				935	935	935	34e9a6678acca924fbf24c6bf5608d56_2312	455a00a194b6732c15d9cd1ede6a821e_2362	8aa1aaefd30e370458343f447b9298d5_2443	S_aureus_12_01802
WP_000886472.1		hypothetical protein	4	4	1	1	1045				836	836	836	34e9a6678acca924fbf24c6bf5608d56_3934	455a00a194b6732c15d9cd1ede6a821e_4020	8aa1aaefd30e370458343f447b9298d5_3900	S_aureus_12_02214
WP_000171926.1		DUF4242 domain-containing protein	4	4	1	1	1847				512	512	512	34e9a6678acca924fbf24c6bf5608d56_271	455a00a194b6732c15d9cd1ede6a821e_242	8aa1aaefd30e370458343f447b9298d5_406	S_aureus_12_00214
trpB		tryptophan synthase subunit beta	4	4	1	1	2016				1214	1214	1214	34e9a6678acca924fbf24c6bf5608d56_2664	455a00a194b6732c15d9cd1ede6a821e_2750	8aa1aaefd30e370458343f447b9298d5_2769	S_aureus_12_02368
WP_000040067.1		acetate kinase	4	4	1	1	43				1202	1202	1202	34e9a6678acca924fbf24c6bf5608d56_3483	455a00a194b6732c15d9cd1ede6a821e_3549	8aa1aaefd30e370458343f447b9298d5_3450	S_aureus_12_02089
WP_001067261.1		deoxynucleoside kinase	4	4	1	1	2724				662	662	662	34e9a6678acca924fbf24c6bf5608d56_1075	455a00a194b6732c15d9cd1ede6a821e_1116	8aa1aaefd30e370458343f447b9298d5_1211	S_aureus_12_01529
WP_000046076.1		NAD(P)/FAD-dependent oxidoreductase	4	4	1	1	2244				1208	1208	1208	34e9a6678acca924fbf24c6bf5608d56_1728	455a00a194b6732c15d9cd1ede6a821e_1781	8aa1aaefd30e370458343f447b9298d5_1856	S_aureus_12_01216
pyrE		orotate phosphoribosyltransferase	4	4	1	1	1811				611	611	611	34e9a6678acca924fbf24c6bf5608d56_2290	455a00a194b6732c15d9cd1ede6a821e_2340	8aa1aaefd30e370458343f447b9298d5_2421	S_aureus_12_01813
WP_001237625.1		hypothetical protein	4	4	1	1	527				416	416	416	34e9a6678acca924fbf24c6bf5608d56_5359	455a00a194b6732c15d9cd1ede6a821e_5399	8aa1aaefd30e370458343f447b9298d5_5380	S_aureus_12_00412
WP_000208581.1		serine hydrolase	4	4	1	1	682				1499	1499	1499	34e9a6678acca924fbf24c6bf5608d56_5039	455a00a194b6732c15d9cd1ede6a821e_5087	8aa1aaefd30e370458343f447b9298d5_5058	S_aureus_12_00848
lacA		galactose-6-phosphate isomerase subunit LacA	4	4	1	1	2941				428	428	428	34e9a6678acca924fbf24c6bf5608d56_4526	455a00a194b6732c15d9cd1ede6a821e_4569	8aa1aaefd30e370458343f447b9298d5_4545	S_aureus_12_00609
WP_000174275.1		glycerophosphoryl diester phosphodiesterase	4	4	1	1	52				743	743	743	34e9a6678acca924fbf24c6bf5608d56_3503	455a00a194b6732c15d9cd1ede6a821e_3569	8aa1aaefd30e370458343f447b9298d5_3470	S_aureus_12_02080
WP_001031407.1		fructose bisphosphate aldolase	4	4	1	1	526				890	890	890	34e9a6678acca924fbf24c6bf5608d56_5361	455a00a194b6732c15d9cd1ede6a821e_5401	8aa1aaefd30e370458343f447b9298d5_5382	S_aureus_12_00413
WP_000208740.1		biotin transporter BioY	4	4	1	1	847				554	554	554	34e9a6678acca924fbf24c6bf5608d56_4702	455a00a194b6732c15d9cd1ede6a821e_4748	8aa1aaefd30e370458343f447b9298d5_4717	S_aureus_12_00688
WP_000902175.1		hypothetical protein	4	4	1	1	1980				203	203	203	34e9a6678acca924fbf24c6bf5608d56_2739	455a00a194b6732c15d9cd1ede6a821e_2824	8aa1aaefd30e370458343f447b9298d5_2843	S_aureus_12_02404
WP_001043863.1		HU family DNA-binding protein	4	4	1	1	1636				272	272	272	34e9a6678acca924fbf24c6bf5608d56_2864	455a00a194b6732c15d9cd1ede6a821e_2949	8aa1aaefd30e370458343f447b9298d5_2968	S_aureus_12_00934
WP_000520233.1		ABC transporter permease	4	4	1	1	2391				695	695	695	34e9a6678acca924fbf24c6bf5608d56_1612	455a00a194b6732c15d9cd1ede6a821e_1715	8aa1aaefd30e370458343f447b9298d5_1790	S_aureus_12_01247
gtxA		flippase GtxA	4	4	1	1	692				386	386	386	34e9a6678acca924fbf24c6bf5608d56_5019	455a00a194b6732c15d9cd1ede6a821e_5067	8aa1aaefd30e370458343f447b9298d5_5038	S_aureus_12_00838
WP_000664740.1		NYN domain-containing protein	4	4	1	1	2748				524	524	524	34e9a6678acca924fbf24c6bf5608d56_1026	455a00a194b6732c15d9cd1ede6a821e_1067	8aa1aaefd30e370458343f447b9298d5_1162	S_aureus_12_01552
WP_000794424.1		GTP-binding protein	4	4	1	1	2080				926	926	926	34e9a6678acca924fbf24c6bf5608d56_1347	455a00a194b6732c15d9cd1ede6a821e_1450	8aa1aaefd30e370458343f447b9298d5_1481	S_aureus_12_01398
scc		complement inhibitor SCIN-C	4	4	1	1	2468				350	350	350	34e9a6678acca924fbf24c6bf5608d56_2193	455a00a194b6732c15d9cd1ede6a821e_2243	8aa1aaefd30e370458343f447b9298d5_2324	S_aureus_12_02468
WP_000831495.1		DUF2294 domain-containing protein	4	4	1	1	2639				362	362	362	34e9a6678acca924fbf24c6bf5608d56_797	455a00a194b6732c15d9cd1ede6a821e_843	8aa1aaefd30e370458343f447b9298d5_928	S_aureus_12_02250
hxlB		6-phospho-3-hexuloisomerase	4	4	1	1	2710				548	548	548	34e9a6678acca924fbf24c6bf5608d56_1105	455a00a194b6732c15d9cd1ede6a821e_1144	8aa1aaefd30e370458343f447b9298d5_1241	S_aureus_12_01514
WP_000782130.1		peptidylprolyl isomerase	4	4	1	1	2999				962	962	962	34e9a6678acca924fbf24c6bf5608d56_3785	455a00a194b6732c15d9cd1ede6a821e_3874	8aa1aaefd30e370458343f447b9298d5_3754	S_aureus_12_01937
WP_000603755.1		isoprenylcysteine carboxyl methyltransferase family protein	4	4	1	1	1888				494	494	494	34e9a6678acca924fbf24c6bf5608d56_353	455a00a194b6732c15d9cd1ede6a821e_324	8aa1aaefd30e370458343f447b9298d5_488	S_aureus_12_00173
WP_000131820.1		AraC family transcriptional regulator	4	4	1	1	832				1955	1955	1955	34e9a6678acca924fbf24c6bf5608d56_4732	455a00a194b6732c15d9cd1ede6a821e_4778	8aa1aaefd30e370458343f447b9298d5_4749	S_aureus_12_00703
WP_000777184.1		metal-dependent hydrolase	4	4	1	1	38				689	689	689	34e9a6678acca924fbf24c6bf5608d56_3473	455a00a194b6732c15d9cd1ede6a821e_3539	8aa1aaefd30e370458343f447b9298d5_3440	S_aureus_12_02093
panC		pantoate--beta-alanine ligase	4	4	1	1	534				851	851	851	34e9a6678acca924fbf24c6bf5608d56_5345	455a00a194b6732c15d9cd1ede6a821e_5385	8aa1aaefd30e370458343f447b9298d5_5366	S_aureus_12_00405
WP_000901760.1		endonuclease III domain-containing protein	4	4	1	1	1355				635	635	635	34e9a6678acca924fbf24c6bf5608d56_1185	455a00a194b6732c15d9cd1ede6a821e_1222	8aa1aaefd30e370458343f447b9298d5_1319	S_aureus_12_01476
nrdH		glutaredoxin-like protein NrdH	4	4	1	1	2618				233	233	233	34e9a6678acca924fbf24c6bf5608d56_2041	455a00a194b6732c15d9cd1ede6a821e_2091	8aa1aaefd30e370458343f447b9298d5_2172	S_aureus_12_01612
WP_000282386.1		RicAFT regulatory complex protein RicA family protein	4	4	1	1	1768				365	365	365	34e9a6678acca924fbf24c6bf5608d56_2470	455a00a194b6732c15d9cd1ede6a821e_2520	8aa1aaefd30e370458343f447b9298d5_2601	S_aureus_12_01725
rpmC		50S ribosomal protein L29	4	4	1	1	889				209	209	209	34e9a6678acca924fbf24c6bf5608d56_4618	455a00a194b6732c15d9cd1ede6a821e_4664	8aa1aaefd30e370458343f447b9298d5_4633	S_aureus_12_00649
isdG		staphylobilin-forming heme oxygenase IsdG	4	4	1	1	2443				323	323	323	34e9a6678acca924fbf24c6bf5608d56_2143	455a00a194b6732c15d9cd1ede6a821e_2193	8aa1aaefd30e370458343f447b9298d5_2274	S_aureus_12_02489
pcp		pyroglutamyl-peptidase I	4	4	1	1	434				638	638	638	34e9a6678acca924fbf24c6bf5608d56_5543	455a00a194b6732c15d9cd1ede6a821e_5586	8aa1aaefd30e370458343f447b9298d5_5568	S_aureus_12_00498
WP_000691837.1		LysR family transcriptional regulator	4	4	1	1	797				884	884	884	34e9a6678acca924fbf24c6bf5608d56_4803	455a00a194b6732c15d9cd1ede6a821e_4849	8aa1aaefd30e370458343f447b9298d5_4820	S_aureus_12_00737
WP_000479281.1		NupC/NupG family nucleoside CNT transporter	4	4	1	1	1136				1229	1229	1229	34e9a6678acca924fbf24c6bf5608d56_1257	455a00a194b6732c15d9cd1ede6a821e_1294	8aa1aaefd30e370458343f447b9298d5_1391	S_aureus_12_01440
WP_000565823.1		phosphatase PAP2 family protein	4	4	1	1	2641				674	674	674	34e9a6678acca924fbf24c6bf5608d56_801	455a00a194b6732c15d9cd1ede6a821e_847	8aa1aaefd30e370458343f447b9298d5_932	S_aureus_12_02249
WP_000811375.1		ribonuclease J	4	4	1	1	2614				1697	1697	1697	34e9a6678acca924fbf24c6bf5608d56_2049	455a00a194b6732c15d9cd1ede6a821e_2099	8aa1aaefd30e370458343f447b9298d5_2180	S_aureus_12_01608
amaP		alkaline shock response membrane anchor protein AmaP	4	4	1	1	2930				536	536	536	34e9a6678acca924fbf24c6bf5608d56_4504	455a00a194b6732c15d9cd1ede6a821e_4547	8aa1aaefd30e370458343f447b9298d5_4523	S_aureus_12_00598
tatC		twin-arginine translocase subunit TatC	4	4	1	1	329				701	701	701	34e9a6678acca924fbf24c6bf5608d56_629	455a00a194b6732c15d9cd1ede6a821e_625	8aa1aaefd30e370458343f447b9298d5_756	S_aureus_12_00044
WP_001001218.1		DNA-3-methyladenine glycosylase I	4	4	1	1	267				560	560	560	34e9a6678acca924fbf24c6bf5608d56_3385	455a00a194b6732c15d9cd1ede6a821e_3452	8aa1aaefd30e370458343f447b9298d5_3353	S_aureus_12_01186
nreC		nitrate respiration regulation response regulator NreC	4	4	1	1	734				653	653	653	34e9a6678acca924fbf24c6bf5608d56_4931	455a00a194b6732c15d9cd1ede6a821e_4979	8aa1aaefd30e370458343f447b9298d5_4950	S_aureus_12_00798
WP_000533488.1		replication initiation and membrane attachment family protein	4	4	1	1	17				1400	1400	1400	34e9a6678acca924fbf24c6bf5608d56_3431	455a00a194b6732c15d9cd1ede6a821e_3497	8aa1aaefd30e370458343f447b9298d5_3398	S_aureus_12_02114
WP_000002080.1		pseudouridine-5'-phosphate glycosidase	4	4	1	1	363				923	923	923	34e9a6678acca924fbf24c6bf5608d56_561	455a00a194b6732c15d9cd1ede6a821e_557	8aa1aaefd30e370458343f447b9298d5_688	S_aureus_12_00079
qoxA		cytochrome aa3 quinol oxidase subunit II	4	4	1	1	2583				1100	1100	1100	34e9a6678acca924fbf24c6bf5608d56_1992	455a00a194b6732c15d9cd1ede6a821e_2042	8aa1aaefd30e370458343f447b9298d5_2121	S_aureus_12_01636
WP_001083492.1		CitMHS family transporter	4	4	1	1	513				1370	1370	1370	34e9a6678acca924fbf24c6bf5608d56_5391	455a00a194b6732c15d9cd1ede6a821e_5431	8aa1aaefd30e370458343f447b9298d5_5412	S_aureus_12_00424
mraZ		division/cell wall cluster transcriptional repressor MraZ	4	4	1	1	1369				431	431	431	34e9a6678acca924fbf24c6bf5608d56_2236	455a00a194b6732c15d9cd1ede6a821e_2286	8aa1aaefd30e370458343f447b9298d5_2367	S_aureus_12_02565
WP_000687296.1		hypothetical protein	4	4	1	1	754				176	176	176	34e9a6678acca924fbf24c6bf5608d56_4891	455a00a194b6732c15d9cd1ede6a821e_4937	8aa1aaefd30e370458343f447b9298d5_4910	S_aureus_12_00779
WP_000894028.1		CdaR family protein	4	4	1	1	2908				932	932	932	34e9a6678acca924fbf24c6bf5608d56_4431	455a00a194b6732c15d9cd1ede6a821e_4474	8aa1aaefd30e370458343f447b9298d5_4450	S_aureus_12_02053
WP_000708692.1		allophanate hydrolase subunit 1	4	4	1	1	2050				710	710	710	34e9a6678acca924fbf24c6bf5608d56_1407	455a00a194b6732c15d9cd1ede6a821e_1510	8aa1aaefd30e370458343f447b9298d5_1541	S_aureus_12_01369
cmk		(d)CMP kinase	4	4	1	1	1630				659	659	659	34e9a6678acca924fbf24c6bf5608d56_2876	455a00a194b6732c15d9cd1ede6a821e_2961	8aa1aaefd30e370458343f447b9298d5_2980	S_aureus_12_00938
sirA		staphyloferrin B ABC transporter substrate-binding protein SirA	4	4	1	1	1275				992	992	992	34e9a6678acca924fbf24c6bf5608d56_159	455a00a194b6732c15d9cd1ede6a821e_130	8aa1aaefd30e370458343f447b9298d5_296	S_aureus_12_00269
WP_000837114.1		ABC transporter substrate-binding protein	4	4	1	1	1948				968	968	968	34e9a6678acca924fbf24c6bf5608d56_361	455a00a194b6732c15d9cd1ede6a821e_332	8aa1aaefd30e370458343f447b9298d5_496	S_aureus_12_00169
rpsR		30S ribosomal protein S18	4	4	1	1	2419				242	242	242	34e9a6678acca924fbf24c6bf5608d56_672	455a00a194b6732c15d9cd1ede6a821e_668	8aa1aaefd30e370458343f447b9298d5_799	S_aureus_12_00023
WP_000128656.1		hypothetical protein	4	4	1	1	780				419	419	419	34e9a6678acca924fbf24c6bf5608d56_4837	455a00a194b6732c15d9cd1ede6a821e_4883	8aa1aaefd30e370458343f447b9298d5_4854	S_aureus_12_00753
tsaD		tRNA (adenosine(37)-N6)-threonylcarbamoyltransferase complex transferase subunit TsaD	4	4	1	1	2795				1025	1025	1025	34e9a6678acca924fbf24c6bf5608d56_4184	455a00a194b6732c15d9cd1ede6a821e_4228	8aa1aaefd30e370458343f447b9298d5_4206	S_aureus_12_02344
WP_000376235.1		MarR family transcriptional regulator	4	4	1	1	609				434	434	434	34e9a6678acca924fbf24c6bf5608d56_5189	455a00a194b6732c15d9cd1ede6a821e_5231	8aa1aaefd30e370458343f447b9298d5_5212	S_aureus_12_00333
sen		staphylococcal enterotoxin type N	4	4	1	1	2982				755	755	755	34e9a6678acca924fbf24c6bf5608d56_3729	455a00a194b6732c15d9cd1ede6a821e_3818	8aa1aaefd30e370458343f447b9298d5_3698	S_aureus_12_01913
WP_000067363.1		ABC transporter ATP-binding protein	4	4	1	1	1874				1592	1592	1592	34e9a6678acca924fbf24c6bf5608d56_325	455a00a194b6732c15d9cd1ede6a821e_296	8aa1aaefd30e370458343f447b9298d5_460	S_aureus_12_00187
WP_001224791.1		acetyltransferase	4	4	1	1	2328				485	485	485	34e9a6678acca924fbf24c6bf5608d56_1504	455a00a194b6732c15d9cd1ede6a821e_1607	8aa1aaefd30e370458343f447b9298d5_1636	S_aureus_12_01323
WP_000214898.1		YkvS family protein	4	4	1	1	2545				176	176	176	34e9a6678acca924fbf24c6bf5608d56_1920	455a00a194b6732c15d9cd1ede6a821e_1970	8aa1aaefd30e370458343f447b9298d5_2047	S_aureus_12_01668
WP_001009683.1		M17 family metallopeptidase	4	4	1	1	2243				1475	1475	1475	34e9a6678acca924fbf24c6bf5608d56_1730	455a00a194b6732c15d9cd1ede6a821e_1783	8aa1aaefd30e370458343f447b9298d5_1858	S_aureus_12_01215
WP_000151114.1		TetR/AcrR family transcriptional regulator	4	4	1	1	537				587	587	587	34e9a6678acca924fbf24c6bf5608d56_5337	455a00a194b6732c15d9cd1ede6a821e_5379	8aa1aaefd30e370458343f447b9298d5_5360	S_aureus_12_00402
WP_000004981.1		HIT family protein	4	4	1	1	2995				422	422	422	34e9a6678acca924fbf24c6bf5608d56_3779	455a00a194b6732c15d9cd1ede6a821e_3868	8aa1aaefd30e370458343f447b9298d5_3748	S_aureus_12_01933
WP_000620191.1		GNAT family N-acetyltransferase	4	4	1	1	1971				509	509	509	34e9a6678acca924fbf24c6bf5608d56_2759	455a00a194b6732c15d9cd1ede6a821e_2844	8aa1aaefd30e370458343f447b9298d5_2863	S_aureus_12_02413
srrA		two-component system response regulator SrrA	4	4	1	1	1501				725	725	725	34e9a6678acca924fbf24c6bf5608d56_3039	455a00a194b6732c15d9cd1ede6a821e_3110	8aa1aaefd30e370458343f447b9298d5_3015	S_aureus_12_01023
lpdA		dihydrolipoyl dehydrogenase	4	4	1	1	1472				1421	1421	1421	34e9a6678acca924fbf24c6bf5608d56_3099	455a00a194b6732c15d9cd1ede6a821e_3170	8aa1aaefd30e370458343f447b9298d5_3073	S_aureus_12_01052
WP_001190845.1		response regulator transcription factor	4	4	1	1	2828				695	695	695	34e9a6678acca924fbf24c6bf5608d56_4268	455a00a194b6732c15d9cd1ede6a821e_4309	8aa1aaefd30e370458343f447b9298d5_4287	S_aureus_12_01975
WP_000786141.1		N-acetyltransferase	4	4	1	1	1297				203	203	203	34e9a6678acca924fbf24c6bf5608d56_113	455a00a194b6732c15d9cd1ede6a821e_84	8aa1aaefd30e370458343f447b9298d5_250	S_aureus_12_00291
atpE		F0F1 ATP synthase subunit C	4	4	1	1	2856				212	212	212	34e9a6678acca924fbf24c6bf5608d56_4327	455a00a194b6732c15d9cd1ede6a821e_4368	8aa1aaefd30e370458343f447b9298d5_4348	S_aureus_12_02003
WP_000625890.1		iron ABC transporter permease	4	4	1	1	1141				1016	1016	1016	34e9a6678acca924fbf24c6bf5608d56_1267	455a00a194b6732c15d9cd1ede6a821e_1304	8aa1aaefd30e370458343f447b9298d5_1401	S_aureus_12_01436
group_1381	thiD	bifunctional hydroxymethylpyrimidine kinase/phosphomethylpyrimidine kinase	4	4	1	1	2841				830	830	830	34e9a6678acca924fbf24c6bf5608d56_4298	455a00a194b6732c15d9cd1ede6a821e_4339	8aa1aaefd30e370458343f447b9298d5_4317	S_aureus_12_01988
group_1382	mqo	malate dehydrogenase (quinone)	4	4	1	1	760				1478	1478	1478	34e9a6678acca924fbf24c6bf5608d56_4879	455a00a194b6732c15d9cd1ede6a821e_4925	8aa1aaefd30e370458343f447b9298d5_4898	S_aureus_12_00773
WP_000055857.1		DUF2316 family protein	4	4	1	1	553				299	299	299	34e9a6678acca924fbf24c6bf5608d56_5305	455a00a194b6732c15d9cd1ede6a821e_5347	8aa1aaefd30e370458343f447b9298d5_5328	S_aureus_12_00386
WP_000995806.1		hypothetical protein	4	4	1	1	1492				248	248	248	34e9a6678acca924fbf24c6bf5608d56_3057	455a00a194b6732c15d9cd1ede6a821e_3128	8aa1aaefd30e370458343f447b9298d5_3033	S_aureus_12_01032
WP_000032653.1		NUDIX domain-containing protein	4	4	1	1	9				608	608	608	34e9a6678acca924fbf24c6bf5608d56_3413	455a00a194b6732c15d9cd1ede6a821e_3480	8aa1aaefd30e370458343f447b9298d5_3381	S_aureus_12_02121
WP_001033867.1		CPBP family glutamic-type intramembrane protease	4	4	1	1	2546				602	602	602	34e9a6678acca924fbf24c6bf5608d56_1922	455a00a194b6732c15d9cd1ede6a821e_1972	8aa1aaefd30e370458343f447b9298d5_2049	S_aureus_12_01667
WP_001030738.1		N-acetylneuraminate lyase	4	4	1	1	360				881	881	881	34e9a6678acca924fbf24c6bf5608d56_567	455a00a194b6732c15d9cd1ede6a821e_563	8aa1aaefd30e370458343f447b9298d5_694	S_aureus_12_00076
WP_001190115.1		16S rRNA (uracil(1498)-N(3))-methyltransferase	4	4	1	1	1413				752	752	752	34e9a6678acca924fbf24c6bf5608d56_3218	455a00a194b6732c15d9cd1ede6a821e_3289	8aa1aaefd30e370458343f447b9298d5_3192	S_aureus_12_01109
rpsM		30S ribosomal protein S13	4	4	1	1	905				365	365	365	34e9a6678acca924fbf24c6bf5608d56_4586	455a00a194b6732c15d9cd1ede6a821e_4632	8aa1aaefd30e370458343f447b9298d5_4601	S_aureus_12_00633
WP_000803176.1		SMC family ATPase	4	4	1	1	2512				3029	3029	3029	34e9a6678acca924fbf24c6bf5608d56_2612	455a00a194b6732c15d9cd1ede6a821e_2698	8aa1aaefd30e370458343f447b9298d5_2717	S_aureus_12_02449
WP_000145497.1		DUF4064 domain-containing protein	4	4	1	1	2191				1019	1019	1019	34e9a6678acca924fbf24c6bf5608d56_2079	455a00a194b6732c15d9cd1ede6a821e_2129	8aa1aaefd30e370458343f447b9298d5_2210	S_aureus_12_01594
WP_001091387.1		DUF1444 domain-containing protein	4	4	1	1	78				857	857	857	34e9a6678acca924fbf24c6bf5608d56_3555	455a00a194b6732c15d9cd1ede6a821e_3621	8aa1aaefd30e370458343f447b9298d5_3524	S_aureus_12_01829
WP_000899891.1		threonine/serine exporter family protein	4	4	1	1	2308				494	494	494	34e9a6678acca924fbf24c6bf5608d56_1465	455a00a194b6732c15d9cd1ede6a821e_1568	8aa1aaefd30e370458343f447b9298d5_1597	S_aureus_12_01341
WP_000863556.1		superoxide dismutase	4	4	1	1	1437				599	599	599	34e9a6678acca924fbf24c6bf5608d56_3170	455a00a194b6732c15d9cd1ede6a821e_3241	8aa1aaefd30e370458343f447b9298d5_3144	S_aureus_12_01085
secG		preprotein translocase subunit SecG	4	4	1	1	2345				233	233	233	34e9a6678acca924fbf24c6bf5608d56_1538	455a00a194b6732c15d9cd1ede6a821e_1641	8aa1aaefd30e370458343f447b9298d5_1670	S_aureus_12_01304
WP_000005879.1		hypothetical protein	4	4	1	1	2371				218	218	218	34e9a6678acca924fbf24c6bf5608d56_1571	455a00a194b6732c15d9cd1ede6a821e_1674	8aa1aaefd30e370458343f447b9298d5_1747	S_aureus_12_01267
walK		cell wall metabolism sensor histidine kinase WalK	4	4	1	1	2152				1826	1826	1826	34e9a6678acca924fbf24c6bf5608d56_47	455a00a194b6732c15d9cd1ede6a821e_47	8aa1aaefd30e370458343f447b9298d5_47	S_aureus_12_00544
WP_000370984.1		DEAD/DEAH box helicase	4	4	1	1	2314				1082	1082	1082	34e9a6678acca924fbf24c6bf5608d56_1477	455a00a194b6732c15d9cd1ede6a821e_1580	8aa1aaefd30e370458343f447b9298d5_1609	S_aureus_12_01335
WP_000687413.1		LysR family transcriptional regulator	4	4	1	1	1165				866	866	866	34e9a6678acca924fbf24c6bf5608d56_1315	455a00a194b6732c15d9cd1ede6a821e_1352	8aa1aaefd30e370458343f447b9298d5_1449	S_aureus_12_01413
gabR		PLP-dependent aminotransferase family protein	4	5	1.25	1	2763				221	1382	1100	34e9a6678acca924fbf24c6bf5608d56_996	455a00a194b6732c15d9cd1ede6a821e_1037 455a00a194b6732c15d9cd1ede6a821e_1033	8aa1aaefd30e370458343f447b9298d5_1130	S_aureus_12_01567
WP_001222137.1		hypothetical protein	4	4	1	1	1349				716	716	716	34e9a6678acca924fbf24c6bf5608d56_1197	455a00a194b6732c15d9cd1ede6a821e_1234	8aa1aaefd30e370458343f447b9298d5_1331	S_aureus_12_01470
purK		5-(carboxyamino)imidazole ribonucleotide synthase	4	4	1	1	2588				1124	1124	1124	34e9a6678acca924fbf24c6bf5608d56_2002	455a00a194b6732c15d9cd1ede6a821e_2052	8aa1aaefd30e370458343f447b9298d5_2131	S_aureus_12_01631
WP_000584497.1		type II toxin-antitoxin system Phd/YefM family antitoxin	4	4	1	1	717				251	251	251	34e9a6678acca924fbf24c6bf5608d56_4965	455a00a194b6732c15d9cd1ede6a821e_5013	8aa1aaefd30e370458343f447b9298d5_4984	S_aureus_12_00815
bstA		bacillithiol transferase BstA	4	4	1	1	433				464	464	464	34e9a6678acca924fbf24c6bf5608d56_5545	455a00a194b6732c15d9cd1ede6a821e_5588	8aa1aaefd30e370458343f447b9298d5_5570	S_aureus_12_00499
WP_000849155.1		YxeA family protein	4	4	1	1	2411				368	368	368	34e9a6678acca924fbf24c6bf5608d56_678	455a00a194b6732c15d9cd1ede6a821e_720	8aa1aaefd30e370458343f447b9298d5_807	S_aureus_12_00020
WP_000034506.1		NAD(P)-dependent oxidoreductase	4	4	1	1	681				851	851	851	34e9a6678acca924fbf24c6bf5608d56_5041	455a00a194b6732c15d9cd1ede6a821e_5089	8aa1aaefd30e370458343f447b9298d5_5060	S_aureus_12_00849
thrS		threonine--tRNA ligase	4	4	1	1	14				1937	1937	1937	34e9a6678acca924fbf24c6bf5608d56_3425	455a00a194b6732c15d9cd1ede6a821e_3491	8aa1aaefd30e370458343f447b9298d5_3392	S_aureus_12_02116
WP_000095390.1		WXG100 family type VII secretion target	4	4	1	1	210				299	299	299	34e9a6678acca924fbf24c6bf5608d56_3693	455a00a194b6732c15d9cd1ede6a821e_3777	8aa1aaefd30e370458343f447b9298d5_3662	S_aureus_12_01896
WP_001045073.1		TrkH family potassium uptake protein	4	4	1	1	2770				1307	1307	1307	34e9a6678acca924fbf24c6bf5608d56_4136	455a00a194b6732c15d9cd1ede6a821e_4178	8aa1aaefd30e370458343f447b9298d5_4156	S_aureus_12_02320
WP_000011687.1		hypothetical protein	4	4	1	1	586				218	218	218	34e9a6678acca924fbf24c6bf5608d56_5237	455a00a194b6732c15d9cd1ede6a821e_5279	8aa1aaefd30e370458343f447b9298d5_5260	S_aureus_12_00355
WP_000198502.1		hypothetical protein	4	4	1	1	1148				428	428	428	34e9a6678acca924fbf24c6bf5608d56_1281	455a00a194b6732c15d9cd1ede6a821e_1318	8aa1aaefd30e370458343f447b9298d5_1415	S_aureus_12_01429
WP_000381855.1		cytochrome ubiquinol oxidase subunit I	4	4	1	1	2617				1361	1361	1361	34e9a6678acca924fbf24c6bf5608d56_2043	455a00a194b6732c15d9cd1ede6a821e_2093	8aa1aaefd30e370458343f447b9298d5_2174	S_aureus_12_01611
WP_000889176.1		esterase family protein	4	4	1	1	385				758	758	758	34e9a6678acca924fbf24c6bf5608d56_1881	455a00a194b6732c15d9cd1ede6a821e_1932	8aa1aaefd30e370458343f447b9298d5_2009	S_aureus_12_01686
WP_000628287.1		hypothetical protein	4	4	1	1	1301				158	158	158	34e9a6678acca924fbf24c6bf5608d56_103	455a00a194b6732c15d9cd1ede6a821e_74	8aa1aaefd30e370458343f447b9298d5_240	S_aureus_12_00296
WP_001159900.1		GRP family sugar transporter	4	4	1	1	874				863	863	863	34e9a6678acca924fbf24c6bf5608d56_4648	455a00a194b6732c15d9cd1ede6a821e_4694	8aa1aaefd30e370458343f447b9298d5_4663	S_aureus_12_00663
murT		lipid II isoglutaminyl synthase subunit MurT	4	4	1	1	1068				1313	1313	1313	34e9a6678acca924fbf24c6bf5608d56_3980	455a00a194b6732c15d9cd1ede6a821e_4066	8aa1aaefd30e370458343f447b9298d5_3946	S_aureus_12_02192
WP_000392691.1		transcriptional repressor	4	4	1	1	1495				449	449	449	34e9a6678acca924fbf24c6bf5608d56_3051	455a00a194b6732c15d9cd1ede6a821e_3122	8aa1aaefd30e370458343f447b9298d5_3027	S_aureus_12_01029
WP_000007960.1		TVP38/TMEM64 family protein	4	4	1	1	2043				575	575	575	34e9a6678acca924fbf24c6bf5608d56_1772	455a00a194b6732c15d9cd1ede6a821e_1825	8aa1aaefd30e370458343f447b9298d5_1900	S_aureus_12_01194
WP_000942303.1		ATP-binding cassette domain-containing protein	4	4	1	1	1998				1601	1601	1601	34e9a6678acca924fbf24c6bf5608d56_2702	455a00a194b6732c15d9cd1ede6a821e_2788	8aa1aaefd30e370458343f447b9298d5_2807	S_aureus_12_02386
WP_000761409.1		ABC transporter permease	4	4	1	1	768				1055	1055	1055	34e9a6678acca924fbf24c6bf5608d56_4863	455a00a194b6732c15d9cd1ede6a821e_4909	8aa1aaefd30e370458343f447b9298d5_4882	S_aureus_12_00765
WP_000746688.1		NDxxF motif lipoprotein	4	4	1	1	1217				626	626	626	34e9a6678acca924fbf24c6bf5608d56_692	455a00a194b6732c15d9cd1ede6a821e_734	8aa1aaefd30e370458343f447b9298d5_821	S_aureus_12_00014
vraX		C1q-binding complement inhibitor VraX	4	4	1	1	1314				167	167	167	34e9a6678acca924fbf24c6bf5608d56_1119	455a00a194b6732c15d9cd1ede6a821e_1158	8aa1aaefd30e370458343f447b9298d5_1255	S_aureus_12_01507
rpmB		50S ribosomal protein L28	4	4	1	1	1698				188	188	188	34e9a6678acca924fbf24c6bf5608d56_2328	455a00a194b6732c15d9cd1ede6a821e_2378	8aa1aaefd30e370458343f447b9298d5_2459	S_aureus_12_01794
WP_001215907.1		acylphosphatase	4	4	1	1	1986				269	269	269	34e9a6678acca924fbf24c6bf5608d56_2727	455a00a194b6732c15d9cd1ede6a821e_2812	8aa1aaefd30e370458343f447b9298d5_2831	S_aureus_12_02398
WP_000556740.1		flavin reductase family protein	4	4	1	1	464				611	611	611	34e9a6678acca924fbf24c6bf5608d56_5485	455a00a194b6732c15d9cd1ede6a821e_5528	8aa1aaefd30e370458343f447b9298d5_5508	S_aureus_12_00468
WP_000245695.1		low temperature requirement protein A	4	4	1	1	322				1133	1133	1133	34e9a6678acca924fbf24c6bf5608d56_643	455a00a194b6732c15d9cd1ede6a821e_639	8aa1aaefd30e370458343f447b9298d5_770	S_aureus_12_00037
WP_000798965.1		DUF1450 domain-containing protein	4	4	1	1	1328				341	341	341	34e9a6678acca924fbf24c6bf5608d56_1147	455a00a194b6732c15d9cd1ede6a821e_1186	8aa1aaefd30e370458343f447b9298d5_1283	S_aureus_12_01493
WP_001101591.1		CDP-glycerol glycerophosphotransferase family protein	4	4	1	1	1131				1103	1103	1103	34e9a6678acca924fbf24c6bf5608d56_1247	455a00a194b6732c15d9cd1ede6a821e_1284	8aa1aaefd30e370458343f447b9298d5_1381	S_aureus_12_01445
WP_001033968.1		DUF1700 domain-containing protein	4	4	1	1	1107				557	557	557	34e9a6678acca924fbf24c6bf5608d56_4058	455a00a194b6732c15d9cd1ede6a821e_4144	8aa1aaefd30e370458343f447b9298d5_4024	S_aureus_12_02157
WP_001292150.1		PTS sugar transporter subunit IIA	4	4	1	1	2904				434	434	434	34e9a6678acca924fbf24c6bf5608d56_4423	455a00a194b6732c15d9cd1ede6a821e_4466	8aa1aaefd30e370458343f447b9298d5_4442	S_aureus_12_02048
scpA		segregation/condensation protein A	4	4	1	1	1498				731	755	737	34e9a6678acca924fbf24c6bf5608d56_3045	455a00a194b6732c15d9cd1ede6a821e_3116	8aa1aaefd30e370458343f447b9298d5_3021	S_aureus_12_01026
WP_000127596.1		alanine racemase	4	4	1	1	1991				1085	1085	1085	34e9a6678acca924fbf24c6bf5608d56_2717	455a00a194b6732c15d9cd1ede6a821e_2802	8aa1aaefd30e370458343f447b9298d5_2821	S_aureus_12_02393
WP_001024574.1		M42 family metallopeptidase	4	4	1	1	80				1076	1076	1076	34e9a6678acca924fbf24c6bf5608d56_3559	455a00a194b6732c15d9cd1ede6a821e_3625	8aa1aaefd30e370458343f447b9298d5_3528	S_aureus_12_01831
groES		co-chaperone GroES	4	4	1	1	2775				284	284	284	34e9a6678acca924fbf24c6bf5608d56_4144	455a00a194b6732c15d9cd1ede6a821e_4188	8aa1aaefd30e370458343f447b9298d5_4166	S_aureus_12_02325
ilvB		biosynthetic-type acetolactate synthase large subunit	4	4	1	1	2801				1769	1769	1769	34e9a6678acca924fbf24c6bf5608d56_4196	455a00a194b6732c15d9cd1ede6a821e_4240	8aa1aaefd30e370458343f447b9298d5_4218	S_aureus_12_02349
WP_000244276.1		GNAT family N-acetyltransferase	4	4	1	1	462				500	500	500	34e9a6678acca924fbf24c6bf5608d56_5489	455a00a194b6732c15d9cd1ede6a821e_5532	8aa1aaefd30e370458343f447b9298d5_5512	S_aureus_12_00470
prfA		peptide chain release factor 1	4	4	1	1	2866				1076	1076	1076	34e9a6678acca924fbf24c6bf5608d56_4347	455a00a194b6732c15d9cd1ede6a821e_4388	8aa1aaefd30e370458343f447b9298d5_4368	S_aureus_12_02013
hutU		urocanate hydratase	4	4	1	1	798				1661	1661	1661	34e9a6678acca924fbf24c6bf5608d56_4801	455a00a194b6732c15d9cd1ede6a821e_4847	8aa1aaefd30e370458343f447b9298d5_4818	S_aureus_12_00736
WP_000621176.1		type II toxin-antitoxin system PemK/MazF family toxin	4	4	1	1	2816				362	362	362	34e9a6678acca924fbf24c6bf5608d56_4244	455a00a194b6732c15d9cd1ede6a821e_4285	8aa1aaefd30e370458343f447b9298d5_4263	S_aureus_12_01964
WP_000433551.1		ABC transporter ATP-binding protein	4	4	1	1	2603				1094	1094	1094	34e9a6678acca924fbf24c6bf5608d56_2071	455a00a194b6732c15d9cd1ede6a821e_2121	8aa1aaefd30e370458343f447b9298d5_2202	S_aureus_12_01598
WP_000777562.1		aminotransferase class I/II-fold pyridoxal phosphate-dependent enzyme	4	4	1	1	2571				1154	1154	1154	34e9a6678acca924fbf24c6bf5608d56_1968	455a00a194b6732c15d9cd1ede6a821e_2018	8aa1aaefd30e370458343f447b9298d5_2097	S_aureus_12_01647
WP_000382585.1		AraC family transcriptional regulator	4	4	1	1	1487				866	893	872	34e9a6678acca924fbf24c6bf5608d56_3067	455a00a194b6732c15d9cd1ede6a821e_3138	8aa1aaefd30e370458343f447b9298d5_3043	S_aureus_12_01037
gpmI		2,3-bisphosphoglycerate-independent phosphoglycerate mutase	4	4	1	1	2342				1517	1517	1517	34e9a6678acca924fbf24c6bf5608d56_1532	455a00a194b6732c15d9cd1ede6a821e_1635	8aa1aaefd30e370458343f447b9298d5_1664	S_aureus_12_01307
WP_000991495.1		alpha-glucoside-specific PTS transporter subunit IIBC	4	4	1	1	806				1604	1604	1604	34e9a6678acca924fbf24c6bf5608d56_4784	455a00a194b6732c15d9cd1ede6a821e_4830	8aa1aaefd30e370458343f447b9298d5_4801	S_aureus_12_00728
WP_000192183.1		fructose-1,6-bisphosphatase	4	4	1	1	613				1964	1964	1964	34e9a6678acca924fbf24c6bf5608d56_5181	455a00a194b6732c15d9cd1ede6a821e_5223	8aa1aaefd30e370458343f447b9298d5_5204	S_aureus_12_00329
pgsA		CDP-diacylglycerol--glycerol-3-phosphate 3-phosphatidyltransferase	4	4	1	1	1758				578	578	578	34e9a6678acca924fbf24c6bf5608d56_2450	455a00a194b6732c15d9cd1ede6a821e_2500	8aa1aaefd30e370458343f447b9298d5_2581	S_aureus_12_01735
WP_000215635.1		HoxN/HupN/NixA family nickel/cobalt transporter	4	4	1	1	428				1016	1016	1016	34e9a6678acca924fbf24c6bf5608d56_5555	455a00a194b6732c15d9cd1ede6a821e_5598	8aa1aaefd30e370458343f447b9298d5_5580	S_aureus_12_00504
WP_000876311.1		ABC transporter permease	4	4	1	1	2297				971	971	971	34e9a6678acca924fbf24c6bf5608d56_1443	455a00a194b6732c15d9cd1ede6a821e_1546	8aa1aaefd30e370458343f447b9298d5_1575	S_aureus_12_01352
seg		staphylococcal enterotoxin type G	4	4	1	1	2981				776	776	776	34e9a6678acca924fbf24c6bf5608d56_3727	455a00a194b6732c15d9cd1ede6a821e_3816	8aa1aaefd30e370458343f447b9298d5_3696	S_aureus_12_01912
hisB		imidazoleglycerol-phosphate dehydratase HisB	4	4	1	1	448				578	578	578	34e9a6678acca924fbf24c6bf5608d56_5515	455a00a194b6732c15d9cd1ede6a821e_5558	8aa1aaefd30e370458343f447b9298d5_5540	S_aureus_12_00484
glpK		glycerol kinase GlpK	4	4	1	1	1774				1496	1496	1496	34e9a6678acca924fbf24c6bf5608d56_2482	455a00a194b6732c15d9cd1ede6a821e_2532	8aa1aaefd30e370458343f447b9298d5_2613	S_aureus_12_01719
WP_001052261.1		ammonium transporter	4	4	1	1	2788				1250	1250	1250	34e9a6678acca924fbf24c6bf5608d56_4170	455a00a194b6732c15d9cd1ede6a821e_4214	8aa1aaefd30e370458343f447b9298d5_4192	S_aureus_12_02338
WP_001799534.1		prepilin-type N-terminal cleavage/methylation domain-containing protein	4	4	1	1	1451				374	497	466	34e9a6678acca924fbf24c6bf5608d56_3142	455a00a194b6732c15d9cd1ede6a821e_3213	8aa1aaefd30e370458343f447b9298d5_3116	S_aureus_12_01072
WP_000991010.1		L-cystine transporter	4	4	1	1	1222				1388	1388	1388	34e9a6678acca924fbf24c6bf5608d56_702	455a00a194b6732c15d9cd1ede6a821e_744	8aa1aaefd30e370458343f447b9298d5_831	S_aureus_12_00009
WP_000072295.1		sensor histidine kinase KdpD	4	4	1	1	2827				2657	2657	2657	34e9a6678acca924fbf24c6bf5608d56_4266	455a00a194b6732c15d9cd1ede6a821e_4307	8aa1aaefd30e370458343f447b9298d5_4285	S_aureus_12_01974
WP_000526541.1		TIGR01212 family radical SAM protein	4	4	1	1	160				953	953	953	34e9a6678acca924fbf24c6bf5608d56_3589	455a00a194b6732c15d9cd1ede6a821e_3667	8aa1aaefd30e370458343f447b9298d5_3558	S_aureus_12_01847
mtnN		5'-methylthioadenosine/S-adenosylhomocysteine nucleosidase	4	4	1	1	1392				686	686	686	34e9a6678acca924fbf24c6bf5608d56_3260	455a00a194b6732c15d9cd1ede6a821e_3331	8aa1aaefd30e370458343f447b9298d5_3232	S_aureus_12_01130
WP_000766009.1		DoxX family protein	4	4	1	1	2555				356	356	356	34e9a6678acca924fbf24c6bf5608d56_1940	455a00a194b6732c15d9cd1ede6a821e_1990	8aa1aaefd30e370458343f447b9298d5_2069	S_aureus_12_01661
mnhE1		Na+/H+ antiporter Mnh1 subunit E	4	4	1	1	2237				479	479	479	34e9a6678acca924fbf24c6bf5608d56_1742	455a00a194b6732c15d9cd1ede6a821e_1795	8aa1aaefd30e370458343f447b9298d5_1870	S_aureus_12_01209
WP_001218603.1		glycerol-3-phosphate dehydrogenase/oxidase	4	4	1	1	1775				1673	1673	1673	34e9a6678acca924fbf24c6bf5608d56_2484	455a00a194b6732c15d9cd1ede6a821e_2534	8aa1aaefd30e370458343f447b9298d5_2615	S_aureus_12_01718
arcA		arginine deiminase	4	4	1	1	490				1235	1235	1235	34e9a6678acca924fbf24c6bf5608d56_5435	455a00a194b6732c15d9cd1ede6a821e_5475	8aa1aaefd30e370458343f447b9298d5_5456	S_aureus_12_00443
queC		7-cyano-7-deazaguanine synthase QueC	4	4	1	1	2055				668	668	668	34e9a6678acca924fbf24c6bf5608d56_1397	455a00a194b6732c15d9cd1ede6a821e_1500	8aa1aaefd30e370458343f447b9298d5_1531	S_aureus_12_01373
WP_000633692.1		ribosomal-processing cysteine protease Prp	4	4	1	1	255				320	320	320	34e9a6678acca924fbf24c6bf5608d56_3355	455a00a194b6732c15d9cd1ede6a821e_3426	8aa1aaefd30e370458343f447b9298d5_3327	S_aureus_12_01176
WP_000844413.1		hypothetical protein	4	4	1	1	1450				299	320	304	34e9a6678acca924fbf24c6bf5608d56_3144	455a00a194b6732c15d9cd1ede6a821e_3215	8aa1aaefd30e370458343f447b9298d5_3118	S_aureus_12_01073
WP_000181322.1		lactonase family protein	4	4	1	1	1102				1028	1028	1028	34e9a6678acca924fbf24c6bf5608d56_4048	455a00a194b6732c15d9cd1ede6a821e_4134	8aa1aaefd30e370458343f447b9298d5_4014	S_aureus_12_02162
guaC		GMP reductase	4	4	1	1	2501				977	977	977	34e9a6678acca924fbf24c6bf5608d56_2590	455a00a194b6732c15d9cd1ede6a821e_2676	8aa1aaefd30e370458343f447b9298d5_2695	S_aureus_12_02440
WP_001028789.1		antibiotic biosynthesis monooxygenase	4	4	1	1	523				443	443	443	34e9a6678acca924fbf24c6bf5608d56_5369	455a00a194b6732c15d9cd1ede6a821e_5409	8aa1aaefd30e370458343f447b9298d5_5390	S_aureus_12_00416
WP_000689585.1		MBL fold metallo-hydrolase	4	4	1	1	147				842	842	842	34e9a6678acca924fbf24c6bf5608d56_3563	455a00a194b6732c15d9cd1ede6a821e_3629	8aa1aaefd30e370458343f447b9298d5_3532	S_aureus_12_01833
WP_000645453.1		response regulator transcription factor LytR	4	4	1	1	1908				740	740	740	34e9a6678acca924fbf24c6bf5608d56_445	455a00a194b6732c15d9cd1ede6a821e_414	8aa1aaefd30e370458343f447b9298d5_578	S_aureus_12_00132
mnhF2		Na+/H+ antiporter Mnh2 subunit F	4	4	1	1	1337				302	302	302	34e9a6678acca924fbf24c6bf5608d56_1221	455a00a194b6732c15d9cd1ede6a821e_1258	8aa1aaefd30e370458343f447b9298d5_1355	S_aureus_12_01458
WP_000291432.1		ROK family protein	4	4	1	1	359				860	860	860	34e9a6678acca924fbf24c6bf5608d56_569	455a00a194b6732c15d9cd1ede6a821e_565	8aa1aaefd30e370458343f447b9298d5_696	S_aureus_12_00075
WP_000606703.1		tripeptidase T	4	4	1	1	1479				1133	1133	1133	34e9a6678acca924fbf24c6bf5608d56_3085	455a00a194b6732c15d9cd1ede6a821e_3156	8aa1aaefd30e370458343f447b9298d5_3059	S_aureus_12_01045
WP_000897633.1		nitric oxide synthase oxygenase	4	4	1	1	1093				1076	1076	1076	34e9a6678acca924fbf24c6bf5608d56_4030	455a00a194b6732c15d9cd1ede6a821e_4116	8aa1aaefd30e370458343f447b9298d5_3996	S_aureus_12_02169
WP_000608129.1		DUF72 domain-containing protein	4	4	1	1	2264				848	848	848	34e9a6678acca924fbf24c6bf5608d56_1688	455a00a194b6732c15d9cd1ede6a821e_1741	8aa1aaefd30e370458343f447b9298d5_1816	S_aureus_12_01235
WP_001791207.1		type II secretion system GspH family protein	4	4	1	1	1449				434	446	443	34e9a6678acca924fbf24c6bf5608d56_3146	455a00a194b6732c15d9cd1ede6a821e_3217	8aa1aaefd30e370458343f447b9298d5_3120	S_aureus_12_01074
WP_000272063.1		heptaprenylglyceryl phosphate synthase	4	4	1	1	1084				692	692	692	34e9a6678acca924fbf24c6bf5608d56_4012	455a00a194b6732c15d9cd1ede6a821e_4098	8aa1aaefd30e370458343f447b9298d5_3978	S_aureus_12_02178
adcA		zinc ABC transporter substrate-binding lipoprotein AdcA	4	4	1	1	719				1547	1547	1547	34e9a6678acca924fbf24c6bf5608d56_4961	455a00a194b6732c15d9cd1ede6a821e_5009	8aa1aaefd30e370458343f447b9298d5_4980	S_aureus_12_00813
WP_000951069.1		winged helix DNA-binding protein	4	4	1	1	865				440	440	440	34e9a6678acca924fbf24c6bf5608d56_4666	455a00a194b6732c15d9cd1ede6a821e_4712	8aa1aaefd30e370458343f447b9298d5_4681	S_aureus_12_00671
truB		tRNA pseudouridine(55) synthase TruB	4	4	1	1	1746				917	917	917	34e9a6678acca924fbf24c6bf5608d56_2426	455a00a194b6732c15d9cd1ede6a821e_2476	8aa1aaefd30e370458343f447b9298d5_2557	S_aureus_12_01747
WP_000668994.1		superantigen-like protein SSL1	4	4	1	1	1208				680	680	680	34e9a6678acca924fbf24c6bf5608d56_737	455a00a194b6732c15d9cd1ede6a821e_779	8aa1aaefd30e370458343f447b9298d5_864	S_aureus_12_02280
WP_000389651.1		energy-coupling factor transporter ATPase	4	4	1	1	2965				809	809	809	34e9a6678acca924fbf24c6bf5608d56_4578	455a00a194b6732c15d9cd1ede6a821e_4621	8aa1aaefd30e370458343f447b9298d5_4593	S_aureus_12_00629
WP_000585095.1		hypothetical protein	4	4	1	1	1182				251	251	251	34e9a6678acca924fbf24c6bf5608d56_2520	455a00a194b6732c15d9cd1ede6a821e_2600	8aa1aaefd30e370458343f447b9298d5_2649	S_aureus_12_02418
rlmB		23S rRNA (guanosine(2251)-2'-O)-methyltransferase RlmB	4	4	1	1	2749				746	746	746	34e9a6678acca924fbf24c6bf5608d56_1024	455a00a194b6732c15d9cd1ede6a821e_1065	8aa1aaefd30e370458343f447b9298d5_1160	S_aureus_12_01553
WP_001191936.1		NAD-dependent deacetylase	4	4	1	1	349				944	944	944	34e9a6678acca924fbf24c6bf5608d56_591	455a00a194b6732c15d9cd1ede6a821e_587	8aa1aaefd30e370458343f447b9298d5_718	S_aureus_12_00064
smpB		SsrA-binding protein SmpB	4	4	1	1	2359				464	464	464	34e9a6678acca924fbf24c6bf5608d56_1544	455a00a194b6732c15d9cd1ede6a821e_1647	8aa1aaefd30e370458343f447b9298d5_1676	S_aureus_12_01301
WP_000164553.1		5-formyltetrahydrofolate cyclo-ligase	4	4	1	1	1440				539	593	552	34e9a6678acca924fbf24c6bf5608d56_3164	455a00a194b6732c15d9cd1ede6a821e_3235	8aa1aaefd30e370458343f447b9298d5_3138	S_aureus_12_01082
cozEa		cell elongation protein CozEa	4	4	1	1	387				1085	1085	1085	34e9a6678acca924fbf24c6bf5608d56_1877	455a00a194b6732c15d9cd1ede6a821e_1928	8aa1aaefd30e370458343f447b9298d5_2005	S_aureus_12_01688
WP_000901019.1		hypothetical protein	4	4	1	1	3022				395	395	395	34e9a6678acca924fbf24c6bf5608d56_3807	455a00a194b6732c15d9cd1ede6a821e_3896	8aa1aaefd30e370458343f447b9298d5_3776	S_aureus_12_01948
rlmN		23S rRNA (adenine(2503)-C(2))-methyltransferase RlmN	4	4	1	1	1692				1094	1094	1094	34e9a6678acca924fbf24c6bf5608d56_2316	455a00a194b6732c15d9cd1ede6a821e_2366	8aa1aaefd30e370458343f447b9298d5_2447	S_aureus_12_01800
rpmH		50S ribosomal protein L34	4	4	1	1	409				137	137	137	34e9a6678acca924fbf24c6bf5608d56_5593	455a00a194b6732c15d9cd1ede6a821e_5636	8aa1aaefd30e370458343f447b9298d5_5618	S_aureus_12_00523
mutY		A/G-specific adenine glycosylase	4	4	1	1	1043				1037	1037	1037	34e9a6678acca924fbf24c6bf5608d56_3930	455a00a194b6732c15d9cd1ede6a821e_4016	8aa1aaefd30e370458343f447b9298d5_3896	S_aureus_12_02216
ybeY		rRNA maturation RNase YbeY	4	4	1	1	1420				467	467	467	34e9a6678acca924fbf24c6bf5608d56_3204	455a00a194b6732c15d9cd1ede6a821e_3275	8aa1aaefd30e370458343f447b9298d5_3178	S_aureus_12_01102
lacD		tagatose-bisphosphate aldolase	4	4	1	1	2938				980	980	980	34e9a6678acca924fbf24c6bf5608d56_4520	455a00a194b6732c15d9cd1ede6a821e_4563	8aa1aaefd30e370458343f447b9298d5_4539	S_aureus_12_00606
betA		choline dehydrogenase	4	4	1	1	521				1709	1709	1709	34e9a6678acca924fbf24c6bf5608d56_5373	455a00a194b6732c15d9cd1ede6a821e_5413	8aa1aaefd30e370458343f447b9298d5_5394	S_aureus_12_00418
WP_001165814.1		NifU N-terminal domain-containing protein	4	4	1	1	1675				251	251	251	34e9a6678acca924fbf24c6bf5608d56_2783	455a00a194b6732c15d9cd1ede6a821e_2868	8aa1aaefd30e370458343f447b9298d5_2887	S_aureus_12_00895
WP_000149426.1		hypothetical protein	4	4	1	1	2031				227	227	227	34e9a6678acca924fbf24c6bf5608d56_2219	455a00a194b6732c15d9cd1ede6a821e_2269	8aa1aaefd30e370458343f447b9298d5_2350	S_aureus_12_02573
WP_001794939.1		helix-turn-helix transcriptional regulator	4	4	1	1	1426				539	623	602	34e9a6678acca924fbf24c6bf5608d56_3192	455a00a194b6732c15d9cd1ede6a821e_3263	8aa1aaefd30e370458343f447b9298d5_3166	S_aureus_12_01096
icd		NADP-dependent isocitrate dehydrogenase	4	4	1	1	26				1268	1268	1268	34e9a6678acca924fbf24c6bf5608d56_3449	455a00a194b6732c15d9cd1ede6a821e_3515	8aa1aaefd30e370458343f447b9298d5_3416	S_aureus_12_02105
WP_000505016.1		transcription antiterminator	4	4	1	1	2522				851	851	851	34e9a6678acca924fbf24c6bf5608d56_2632	455a00a194b6732c15d9cd1ede6a821e_2718	8aa1aaefd30e370458343f447b9298d5_2737	S_aureus_12_02459
WP_001241228.1		bifunctional metallophosphatase/5'-nucleotidase	4	4	1	1	2262				1319	1319	1319	34e9a6678acca924fbf24c6bf5608d56_1692	455a00a194b6732c15d9cd1ede6a821e_1745	8aa1aaefd30e370458343f447b9298d5_1820	S_aureus_12_01233
ssb		single-stranded DNA-binding protein	4	4	1	1	2407				503	503	503	34e9a6678acca924fbf24c6bf5608d56_670	455a00a194b6732c15d9cd1ede6a821e_666	8aa1aaefd30e370458343f447b9298d5_797	S_aureus_12_00024
WP_000274850.1		VOC family protein	4	4	1	1	1821				797	797	797	34e9a6678acca924fbf24c6bf5608d56_2270	455a00a194b6732c15d9cd1ede6a821e_2320	8aa1aaefd30e370458343f447b9298d5_2401	S_aureus_12_01823
WP_000872867.1		RNA polymerase sigma factor	4	4	1	1	2747				569	569	569	34e9a6678acca924fbf24c6bf5608d56_1028	455a00a194b6732c15d9cd1ede6a821e_1069	8aa1aaefd30e370458343f447b9298d5_1164	S_aureus_12_01551
WP_001261683.1		FAD/NAD(P)-binding domain-containing protein	4	4	1	1	170				1502	1502	1502	34e9a6678acca924fbf24c6bf5608d56_3610	455a00a194b6732c15d9cd1ede6a821e_3690	8aa1aaefd30e370458343f447b9298d5_3579	S_aureus_12_01856
spoVG		septation regulator SpoVG	4	4	1	1	2684				302	302	302	34e9a6678acca924fbf24c6bf5608d56_904	455a00a194b6732c15d9cd1ede6a821e_950	8aa1aaefd30e370458343f447b9298d5_1035	S_aureus_12_02532
WP_000022329.1		biotin-dependent carboxyltransferase family protein	4	4	1	1	2280				1004	1004	1004	34e9a6678acca924fbf24c6bf5608d56_1409	455a00a194b6732c15d9cd1ede6a821e_1512	8aa1aaefd30e370458343f447b9298d5_1543	S_aureus_12_01368
WP_000052076.1		hypothetical protein	4	4	1	1	2374				188	188	188	34e9a6678acca924fbf24c6bf5608d56_1577	455a00a194b6732c15d9cd1ede6a821e_1680	8aa1aaefd30e370458343f447b9298d5_1753	S_aureus_12_01264
WP_000516938.1		DUF1934 domain-containing protein	4	4	1	1	1357				383	428	410	34e9a6678acca924fbf24c6bf5608d56_1181	455a00a194b6732c15d9cd1ede6a821e_1218	8aa1aaefd30e370458343f447b9298d5_1315	S_aureus_12_01478
WP_001802667.1		hypothetical protein	4	4	1	1	1416				683	707	689	34e9a6678acca924fbf24c6bf5608d56_3212	455a00a194b6732c15d9cd1ede6a821e_3283	8aa1aaefd30e370458343f447b9298d5_3186	S_aureus_12_01106
cntL		D-histidine (S)-2-aminobutanoyltransferase CntL	4	4	1	1	653				818	818	818	34e9a6678acca924fbf24c6bf5608d56_5097	455a00a194b6732c15d9cd1ede6a821e_5141	8aa1aaefd30e370458343f447b9298d5_5116	S_aureus_12_00875
WP_000516800.1		DUF4889 domain-containing protein	4	4	1	1	1663				332	332	332	34e9a6678acca924fbf24c6bf5608d56_2807	455a00a194b6732c15d9cd1ede6a821e_2892	8aa1aaefd30e370458343f447b9298d5_2911	S_aureus_12_00906
rbfA		30S ribosome-binding factor RbfA	4	4	1	1	1745				350	350	350	34e9a6678acca924fbf24c6bf5608d56_2424	455a00a194b6732c15d9cd1ede6a821e_2474	8aa1aaefd30e370458343f447b9298d5_2555	S_aureus_12_01748
uhpT		hexose-6-phosphate:phosphate antiporter	4	4	1	1	1889				1379	1379	1379	34e9a6678acca924fbf24c6bf5608d56_355	455a00a194b6732c15d9cd1ede6a821e_326	8aa1aaefd30e370458343f447b9298d5_490	S_aureus_12_00172
lytM		glycine-glycine endopeptidase LytM	4	4	1	1	1892				950	950	950	34e9a6678acca924fbf24c6bf5608d56_479	455a00a194b6732c15d9cd1ede6a821e_448	8aa1aaefd30e370458343f447b9298d5_612	S_aureus_12_00117
group_1505	scpA	cysteine protease staphopain A	4	4	1	1	1087				1166	1166	1166	34e9a6678acca924fbf24c6bf5608d56_4018	455a00a194b6732c15d9cd1ede6a821e_4104	8aa1aaefd30e370458343f447b9298d5_3984	S_aureus_12_02175
ugpC		sn-glycerol-3-phosphate ABC transporter ATP-binding protein UgpC	4	4	1	1	1881				1097	1097	1097	34e9a6678acca924fbf24c6bf5608d56_339	455a00a194b6732c15d9cd1ede6a821e_310	8aa1aaefd30e370458343f447b9298d5_474	S_aureus_12_00180
recX		recombination regulator RecX	4	4	1	1	1048				818	818	818	34e9a6678acca924fbf24c6bf5608d56_3940	455a00a194b6732c15d9cd1ede6a821e_4026	8aa1aaefd30e370458343f447b9298d5_3906	S_aureus_12_02211
rpmD		50S ribosomal protein L30	4	4	1	1	899				179	179	179	34e9a6678acca924fbf24c6bf5608d56_4598	455a00a194b6732c15d9cd1ede6a821e_4644	8aa1aaefd30e370458343f447b9298d5_4613	S_aureus_12_00639
rplO		50S ribosomal protein L15	4	4	1	1	900				440	440	440	34e9a6678acca924fbf24c6bf5608d56_4596	455a00a194b6732c15d9cd1ede6a821e_4642	8aa1aaefd30e370458343f447b9298d5_4611	S_aureus_12_00638
hemW		radical SAM family heme chaperone HemW	4	4	1	1	1407				1124	1157	1132	34e9a6678acca924fbf24c6bf5608d56_3230	455a00a194b6732c15d9cd1ede6a821e_3301	8aa1aaefd30e370458343f447b9298d5_3204	S_aureus_12_01115
saeR		response regulator transcription factor SaeR	4	4	1	1	2061				686	686	686	34e9a6678acca924fbf24c6bf5608d56_1385	455a00a194b6732c15d9cd1ede6a821e_1488	8aa1aaefd30e370458343f447b9298d5_1519	S_aureus_12_01379
WP_000238542.1		MarR family transcriptional regulator	4	4	1	1	771				455	455	455	34e9a6678acca924fbf24c6bf5608d56_4857	455a00a194b6732c15d9cd1ede6a821e_4903	8aa1aaefd30e370458343f447b9298d5_4876	S_aureus_12_00762
WP_000735034.1		ABC transporter substrate-binding protein	4	4	1	1	845				908	908	908	34e9a6678acca924fbf24c6bf5608d56_4706	455a00a194b6732c15d9cd1ede6a821e_4752	8aa1aaefd30e370458343f447b9298d5_4721	S_aureus_12_00690
sem		staphylococcal enterotoxin type M	4	4	1	1	2985				719	719	719	34e9a6678acca924fbf24c6bf5608d56_3735	455a00a194b6732c15d9cd1ede6a821e_3824	8aa1aaefd30e370458343f447b9298d5_3704	S_aureus_12_01916
WP_000623445.1		MOSC domain-containing protein	4	4	1	1	792				653	653	653	34e9a6678acca924fbf24c6bf5608d56_4813	455a00a194b6732c15d9cd1ede6a821e_4859	8aa1aaefd30e370458343f447b9298d5_4830	S_aureus_12_00742
WP_000814087.1		proline--tRNA ligase	4	4	1	1	1738				1703	1703	1703	34e9a6678acca924fbf24c6bf5608d56_2410	455a00a194b6732c15d9cd1ede6a821e_2460	8aa1aaefd30e370458343f447b9298d5_2541	S_aureus_12_01755
WP_000586376.1		FUSC family protein	4	4	1	1	621				1823	1823	1823	34e9a6678acca924fbf24c6bf5608d56_5165	455a00a194b6732c15d9cd1ede6a821e_5207	8aa1aaefd30e370458343f447b9298d5_5188	S_aureus_12_00321
WP_000258151.1		undecaprenyl/decaprenyl-phosphate alpha-N-acetylglucosaminyl 1-phosphate transferase	4	4	1	1	2311				1055	1055	1055	34e9a6678acca924fbf24c6bf5608d56_1471	455a00a194b6732c15d9cd1ede6a821e_1574	8aa1aaefd30e370458343f447b9298d5_1603	S_aureus_12_01338
WP_000206618.1		ArgE/DapE family deacylase	4	4	1	1	2769				1223	1223	1223	34e9a6678acca924fbf24c6bf5608d56_4134	455a00a194b6732c15d9cd1ede6a821e_4176	8aa1aaefd30e370458343f447b9298d5_4154	S_aureus_12_02319
tsf		translation elongation factor Ts	4	4	1	1	1732				881	881	881	34e9a6678acca924fbf24c6bf5608d56_2398	455a00a194b6732c15d9cd1ede6a821e_2448	8aa1aaefd30e370458343f447b9298d5_2529	S_aureus_12_01761
comEC		DNA internalization-related competence protein ComEC/Rec2	4	4	1	1	1403				2147	2201	2187	34e9a6678acca924fbf24c6bf5608d56_3238	455a00a194b6732c15d9cd1ede6a821e_3309	8aa1aaefd30e370458343f447b9298d5_3212	S_aureus_12_01119
WP_000665741.1		sodium:solute symporter	4	4	1	1	361				1532	1532	1532	34e9a6678acca924fbf24c6bf5608d56_565	455a00a194b6732c15d9cd1ede6a821e_561	8aa1aaefd30e370458343f447b9298d5_692	S_aureus_12_00077
arsB		arsenite efflux transporter membrane subunit ArsB	4	4	1	1	172				1292	1292	1292	34e9a6678acca924fbf24c6bf5608d56_3614	455a00a194b6732c15d9cd1ede6a821e_3694	8aa1aaefd30e370458343f447b9298d5_3583	S_aureus_12_01858
ruvA		Holliday junction branch migration protein RuvA	4	4	1	1	251				602	602	602	34e9a6678acca924fbf24c6bf5608d56_3347	455a00a194b6732c15d9cd1ede6a821e_3418	8aa1aaefd30e370458343f447b9298d5_3319	S_aureus_12_01172
WP_000648118.1		YtxH domain-containing protein	4	4	1	1	2996				365	365	365	34e9a6678acca924fbf24c6bf5608d56_3781	455a00a194b6732c15d9cd1ede6a821e_3870	8aa1aaefd30e370458343f447b9298d5_3750	S_aureus_12_01934
WP_000337379.1		linear amide C-N hydrolase	4	4	1	1	1893				992	992	992	34e9a6678acca924fbf24c6bf5608d56_477	455a00a194b6732c15d9cd1ede6a821e_446	8aa1aaefd30e370458343f447b9298d5_610	S_aureus_12_00118
WP_000226930.1		DNA polymerase III subunit alpha	4	4	1	1	34				3197	3197	3197	34e9a6678acca924fbf24c6bf5608d56_3465	455a00a194b6732c15d9cd1ede6a821e_3531	8aa1aaefd30e370458343f447b9298d5_3432	S_aureus_12_02097
atpB		F0F1 ATP synthase subunit A	4	4	1	1	2857				728	728	728	34e9a6678acca924fbf24c6bf5608d56_4329	455a00a194b6732c15d9cd1ede6a821e_4370	8aa1aaefd30e370458343f447b9298d5_4350	S_aureus_12_02004
menB		1,4-dihydroxy-2-naphthoyl-CoA synthase	4	4	1	1	2565				821	821	821	34e9a6678acca924fbf24c6bf5608d56_1960	455a00a194b6732c15d9cd1ede6a821e_2010	8aa1aaefd30e370458343f447b9298d5_2089	S_aureus_12_01652
rnz		ribonuclease Z	4	4	1	1	1489				920	920	920	34e9a6678acca924fbf24c6bf5608d56_3063	455a00a194b6732c15d9cd1ede6a821e_3134	8aa1aaefd30e370458343f447b9298d5_3039	S_aureus_12_01035
WP_001014423.1		aromatic acid exporter family protein	4	4	1	1	1064				986	986	986	34e9a6678acca924fbf24c6bf5608d56_3972	455a00a194b6732c15d9cd1ede6a821e_4058	8aa1aaefd30e370458343f447b9298d5_3938	S_aureus_12_02195
WP_000439692.1		ComE operon protein 2	4	4	1	1	1402				431	461	453	34e9a6678acca924fbf24c6bf5608d56_3240	455a00a194b6732c15d9cd1ede6a821e_3311	8aa1aaefd30e370458343f447b9298d5_3214	S_aureus_12_01120
WP_000024292.1		GNAT family N-acetyltransferase	4	4	1	1	723				536	536	536	34e9a6678acca924fbf24c6bf5608d56_4953	455a00a194b6732c15d9cd1ede6a821e_5001	8aa1aaefd30e370458343f447b9298d5_4972	S_aureus_12_00809
WP_000616885.1		phosphomevalonate kinase	4	4	1	1	1327				1076	1076	1076	34e9a6678acca924fbf24c6bf5608d56_1145	455a00a194b6732c15d9cd1ede6a821e_1184	8aa1aaefd30e370458343f447b9298d5_1281	S_aureus_12_01494
WP_000808817.1		hypothetical protein	4	4	1	1	2890				230	230	230	34e9a6678acca924fbf24c6bf5608d56_4395	455a00a194b6732c15d9cd1ede6a821e_4436	8aa1aaefd30e370458343f447b9298d5_4416	S_aureus_12_02037
WP_000528924.1		S-adenosyl-l-methionine hydroxide adenosyltransferase family protein	4	4	1	1	438				848	848	848	34e9a6678acca924fbf24c6bf5608d56_5535	455a00a194b6732c15d9cd1ede6a821e_5578	8aa1aaefd30e370458343f447b9298d5_5560	S_aureus_12_00494
WP_001251219.1		glucosamine-6-phosphate isomerase	4	4	1	1	3020				599	599	599	34e9a6678acca924fbf24c6bf5608d56_3811	455a00a194b6732c15d9cd1ede6a821e_3900	8aa1aaefd30e370458343f447b9298d5_3780	S_aureus_12_01950
WP_000837752.1		teichoic acid D-Ala incorporation-associated protein DltX	4	4	1	1	2254				152	152	152	34e9a6678acca924fbf24c6bf5608d56_1708	455a00a194b6732c15d9cd1ede6a821e_1761	8aa1aaefd30e370458343f447b9298d5_1836	S_aureus_12_01226
hemE		uroporphyrinogen decarboxylase	4	4	1	1	2990				1037	1037	1037	34e9a6678acca924fbf24c6bf5608d56_3769	455a00a194b6732c15d9cd1ede6a821e_3858	8aa1aaefd30e370458343f447b9298d5_3738	S_aureus_12_01929
WP_001246011.1		helix-turn-helix transcriptional regulator	4	4	1	1	326				203	203	203	34e9a6678acca924fbf24c6bf5608d56_635	455a00a194b6732c15d9cd1ede6a821e_631	8aa1aaefd30e370458343f447b9298d5_762	S_aureus_12_00041
traP		signal transduction protein TRAP	4	4	1	1	2992				503	503	503	34e9a6678acca924fbf24c6bf5608d56_3773	455a00a194b6732c15d9cd1ede6a821e_3862	8aa1aaefd30e370458343f447b9298d5_3742	S_aureus_12_01930
dltA		D-alanine--poly(phosphoribitol) ligase subunit DltA	4	4	1	1	2253				1457	1457	1457	34e9a6678acca924fbf24c6bf5608d56_1710	455a00a194b6732c15d9cd1ede6a821e_1763	8aa1aaefd30e370458343f447b9298d5_1838	S_aureus_12_01225
nreB		nitrate respiration regulation sensor histidine kinase NreB	4	4	1	1	733				1034	1034	1034	34e9a6678acca924fbf24c6bf5608d56_4933	455a00a194b6732c15d9cd1ede6a821e_4981	8aa1aaefd30e370458343f447b9298d5_4952	S_aureus_12_00799
WP_000883646.1		acetyl-CoA carboxylase carboxyltransferase subunit alpha	4	4	1	1	31				944	944	944	34e9a6678acca924fbf24c6bf5608d56_3459	455a00a194b6732c15d9cd1ede6a821e_3525	8aa1aaefd30e370458343f447b9298d5_3426	S_aureus_12_02100
trmL		tRNA (uridine(34)/cytosine(34)/5-carboxymethylaminomethyluridine(34)-2'-O)-methyltransferase TrmL	4	4	1	1	3019				470	470	470	34e9a6678acca924fbf24c6bf5608d56_3813	455a00a194b6732c15d9cd1ede6a821e_3902	8aa1aaefd30e370458343f447b9298d5_3782	S_aureus_12_01951
lrgB		antiholin-like protein LrgB	4	4	1	1	1906				701	701	701	34e9a6678acca924fbf24c6bf5608d56_449	455a00a194b6732c15d9cd1ede6a821e_418	8aa1aaefd30e370458343f447b9298d5_582	S_aureus_12_00130
WP_000916193.1		aromatic acid exporter family protein	4	4	1	1	1477				980	980	980	34e9a6678acca924fbf24c6bf5608d56_3089	455a00a194b6732c15d9cd1ede6a821e_3160	8aa1aaefd30e370458343f447b9298d5_3063	S_aureus_12_01047
murC		UDP-N-acetylmuramate--L-alanine ligase	4	4	1	1	75				1313	1313	1313	34e9a6678acca924fbf24c6bf5608d56_3549	455a00a194b6732c15d9cd1ede6a821e_3615	8aa1aaefd30e370458343f447b9298d5_3518	S_aureus_12_01826
fakB2		fatty acid kinase binding subunit FakB2	4	4	1	1	1680				839	839	839	34e9a6678acca924fbf24c6bf5608d56_2773	455a00a194b6732c15d9cd1ede6a821e_2858	8aa1aaefd30e370458343f447b9298d5_2877	S_aureus_12_00890
pheS		phenylalanine--tRNA ligase subunit alpha	4	4	1	1	2446				1058	1058	1058	34e9a6678acca924fbf24c6bf5608d56_2149	455a00a194b6732c15d9cd1ede6a821e_2199	8aa1aaefd30e370458343f447b9298d5_2280	S_aureus_12_02487
yajC		preprotein translocase subunit YajC	4	4	1	1	247				260	260	260	34e9a6678acca924fbf24c6bf5608d56_3339	455a00a194b6732c15d9cd1ede6a821e_3410	8aa1aaefd30e370458343f447b9298d5_3311	S_aureus_12_01168
mnhB2		Na+/H+ antiporter Mnh2 subunit B	4	4	1	1	1341				425	425	425	34e9a6678acca924fbf24c6bf5608d56_1213	455a00a194b6732c15d9cd1ede6a821e_1250	8aa1aaefd30e370458343f447b9298d5_1347	S_aureus_12_01462
WP_000008061.1		hypothetical protein	4	4	1	1	233				146	146	146	34e9a6678acca924fbf24c6bf5608d56_3308	455a00a194b6732c15d9cd1ede6a821e_3379	8aa1aaefd30e370458343f447b9298d5_3280	S_aureus_12_01155
WP_000173891.1		L-lactate permease	4	4	1	1	1280				1592	1592	1592	34e9a6678acca924fbf24c6bf5608d56_149	455a00a194b6732c15d9cd1ede6a821e_120	8aa1aaefd30e370458343f447b9298d5_286	S_aureus_12_00274
pde2		pApA hydrolase Pde2	4	4	1	1	35				941	941	941	34e9a6678acca924fbf24c6bf5608d56_3467	455a00a194b6732c15d9cd1ede6a821e_3533	8aa1aaefd30e370458343f447b9298d5_3434	S_aureus_12_02096
WP_001163814.1		helix-turn-helix domain-containing protein	4	4	1	1	1624				953	953	953	34e9a6678acca924fbf24c6bf5608d56_2888	455a00a194b6732c15d9cd1ede6a821e_2973	8aa1aaefd30e370458343f447b9298d5_2992	S_aureus_12_00943
group_1553	arcC	carbamate kinase	4	4	1	1	493				941	941	941	34e9a6678acca924fbf24c6bf5608d56_5429	455a00a194b6732c15d9cd1ede6a821e_5469	8aa1aaefd30e370458343f447b9298d5_5450	S_aureus_12_00440
scdA		iron-sulfur cluster repair di-iron protein ScdA	4	4	1	1	1910				674	674	674	34e9a6678acca924fbf24c6bf5608d56_441	455a00a194b6732c15d9cd1ede6a821e_410	8aa1aaefd30e370458343f447b9298d5_574	S_aureus_12_00134
WP_000451297.1		RluA family pseudouridine synthase	4	4	1	1	1819				917	917	917	34e9a6678acca924fbf24c6bf5608d56_2274	455a00a194b6732c15d9cd1ede6a821e_2324	8aa1aaefd30e370458343f447b9298d5_2405	S_aureus_12_01821
nagA		N-acetylglucosamine-6-phosphate deacetylase	4	4	1	1	2066				1181	1181	1181	34e9a6678acca924fbf24c6bf5608d56_1375	455a00a194b6732c15d9cd1ede6a821e_1478	8aa1aaefd30e370458343f447b9298d5_1509	S_aureus_12_01384
WP_000569884.1		GNAT family N-acetyltransferase	4	4	1	1	2380				494	494	494	34e9a6678acca924fbf24c6bf5608d56_1589	455a00a194b6732c15d9cd1ede6a821e_1692	8aa1aaefd30e370458343f447b9298d5_1765	S_aureus_12_01258
WP_000089284.1		S8 family serine peptidase	4	4	1	1	419				803	803	803	34e9a6678acca924fbf24c6bf5608d56_5573	455a00a194b6732c15d9cd1ede6a821e_5616	8aa1aaefd30e370458343f447b9298d5_5598	S_aureus_12_00513
WP_000720821.1		ABC transporter substrate-binding protein	4	4	1	1	1877				1775	1775	1775	34e9a6678acca924fbf24c6bf5608d56_331	455a00a194b6732c15d9cd1ede6a821e_302	8aa1aaefd30e370458343f447b9298d5_466	S_aureus_12_00184
radC		DNA repair protein RadC	4	4	1	1	263				656	686	678	34e9a6678acca924fbf24c6bf5608d56_3372	455a00a194b6732c15d9cd1ede6a821e_3443	8aa1aaefd30e370458343f447b9298d5_3344	S_aureus_12_01182
WP_001117769.1		PhoH family protein	4	4	1	1	1419				947	947	947	34e9a6678acca924fbf24c6bf5608d56_3206	455a00a194b6732c15d9cd1ede6a821e_3277	8aa1aaefd30e370458343f447b9298d5_3180	S_aureus_12_01103
WP_000240107.1		ABC transporter permease	4	4	1	1	1876				1163	1163	1163	34e9a6678acca924fbf24c6bf5608d56_329	455a00a194b6732c15d9cd1ede6a821e_300	8aa1aaefd30e370458343f447b9298d5_464	S_aureus_12_00185
WP_001109939.1		rod shape-determining protein RodA	4	4	1	1	2832				1202	1202	1202	34e9a6678acca924fbf24c6bf5608d56_4276	455a00a194b6732c15d9cd1ede6a821e_4317	8aa1aaefd30e370458343f447b9298d5_4295	S_aureus_12_01979
WP_000953743.1		alkaline phosphatase	4	4	1	1	500				1424	1424	1424	34e9a6678acca924fbf24c6bf5608d56_5417	455a00a194b6732c15d9cd1ede6a821e_5457	8aa1aaefd30e370458343f447b9298d5_5438	S_aureus_12_00434
WP_000070826.1		DUF4887 domain-containing protein	4	4	1	1	2337				629	629	629	34e9a6678acca924fbf24c6bf5608d56_1522	455a00a194b6732c15d9cd1ede6a821e_1625	8aa1aaefd30e370458343f447b9298d5_1654	S_aureus_12_01312
yabA		DNA replication initiation control protein YabA	4	4	1	1	2672				347	347	347	34e9a6678acca924fbf24c6bf5608d56_880	455a00a194b6732c15d9cd1ede6a821e_926	8aa1aaefd30e370458343f447b9298d5_1011	S_aureus_12_02544
WP_000595617.1		leukocidin/hemolysin toxin family protein	4	4	1	1	2767				1019	1019	1019	34e9a6678acca924fbf24c6bf5608d56_4130	455a00a194b6732c15d9cd1ede6a821e_4172	8aa1aaefd30e370458343f447b9298d5_4150	S_aureus_12_02317
WP_000149292.1		PaaI family thioesterase	4	4	1	1	2241				374	374	374	34e9a6678acca924fbf24c6bf5608d56_1734	455a00a194b6732c15d9cd1ede6a821e_1787	8aa1aaefd30e370458343f447b9298d5_1862	S_aureus_12_01213
WP_000220932.1		single-stranded DNA-binding protein	4	4	1	1	641				281	281	281	34e9a6678acca924fbf24c6bf5608d56_5121	455a00a194b6732c15d9cd1ede6a821e_5165	8aa1aaefd30e370458343f447b9298d5_5142	S_aureus_12_00302
WP_001092006.1		DUF2294 domain-containing protein	4	4	1	1	1852				359	359	359	34e9a6678acca924fbf24c6bf5608d56_281	455a00a194b6732c15d9cd1ede6a821e_252	8aa1aaefd30e370458343f447b9298d5_416	S_aureus_12_00209
infC		translation initiation factor IF-3	4	4	1	1	12				527	560	535	34e9a6678acca924fbf24c6bf5608d56_3419	455a00a194b6732c15d9cd1ede6a821e_3486	8aa1aaefd30e370458343f447b9298d5_3387	S_aureus_12_02118
WP_001574742.1		YojF family protein	4	4	1	1	2713				362	362	362	34e9a6678acca924fbf24c6bf5608d56_1099	455a00a194b6732c15d9cd1ede6a821e_1138	8aa1aaefd30e370458343f447b9298d5_1235	S_aureus_12_01517
rplI		50S ribosomal protein L9	4	4	1	1	2148				446	446	446	34e9a6678acca924fbf24c6bf5608d56_33	455a00a194b6732c15d9cd1ede6a821e_33	8aa1aaefd30e370458343f447b9298d5_33	S_aureus_12_00538
WP_000584765.1		ABC transporter permease	4	4	1	1	657				869	869	869	34e9a6678acca924fbf24c6bf5608d56_5089	455a00a194b6732c15d9cd1ede6a821e_5133	8aa1aaefd30e370458343f447b9298d5_5108	S_aureus_12_00871
WP_000183386.1		polyprenyl synthetase family protein	4	4	1	1	1469				881	881	881	34e9a6678acca924fbf24c6bf5608d56_3105	455a00a194b6732c15d9cd1ede6a821e_3176	8aa1aaefd30e370458343f447b9298d5_3079	S_aureus_12_01055
WP_000791607.1		energy-coupling factor transporter transmembrane protein EcfT	4	4	1	1	2963				806	806	806	34e9a6678acca924fbf24c6bf5608d56_4574	455a00a194b6732c15d9cd1ede6a821e_4617	8aa1aaefd30e370458343f447b9298d5_4589	S_aureus_12_00627
yqeK		bis(5'-nucleosyl)-tetraphosphatase (symmetrical) YqeK	4	4	1	1	1398				584	584	584	34e9a6678acca924fbf24c6bf5608d56_3248	455a00a194b6732c15d9cd1ede6a821e_3319	8aa1aaefd30e370458343f447b9298d5_3222	S_aureus_12_01124
nrdF		class 1b ribonucleoside-diphosphate reductase subunit beta	4	4	1	1	2296				971	971	971	34e9a6678acca924fbf24c6bf5608d56_1441	455a00a194b6732c15d9cd1ede6a821e_1544	8aa1aaefd30e370458343f447b9298d5_1573	S_aureus_12_01353
essA		type VII secretion protein EssA	4	4	1	1	279				458	458	458	34e9a6678acca924fbf24c6bf5608d56_495	455a00a194b6732c15d9cd1ede6a821e_466	8aa1aaefd30e370458343f447b9298d5_628	S_aureus_12_00109
WP_000532966.1		YebC/PmpR family DNA-binding transcriptional regulator	4	4	1	1	1161				716	716	716	34e9a6678acca924fbf24c6bf5608d56_1307	455a00a194b6732c15d9cd1ede6a821e_1344	8aa1aaefd30e370458343f447b9298d5_1441	S_aureus_12_01416
WP_000794020.1		NAD(P)/FAD-dependent oxidoreductase	4	4	1	1	2247				1064	1064	1064	34e9a6678acca924fbf24c6bf5608d56_1722	455a00a194b6732c15d9cd1ede6a821e_1775	8aa1aaefd30e370458343f447b9298d5_1850	S_aureus_12_01219
WP_001045133.1		response regulator transcription factor	4	4	1	1	3006				623	623	623	34e9a6678acca924fbf24c6bf5608d56_3799	455a00a194b6732c15d9cd1ede6a821e_3888	8aa1aaefd30e370458343f447b9298d5_3768	S_aureus_12_01944
WP_000917674.1		hypothetical protein	4	4	1	1	812				356	356	356	34e9a6678acca924fbf24c6bf5608d56_4772	455a00a194b6732c15d9cd1ede6a821e_4818	8aa1aaefd30e370458343f447b9298d5_4789	S_aureus_12_00722
WP_000828354.1		hypothetical protein	4	4	1	1	2833				137	137	137	34e9a6678acca924fbf24c6bf5608d56_4280	455a00a194b6732c15d9cd1ede6a821e_4321	8aa1aaefd30e370458343f447b9298d5_4299	S_aureus_12_01980
WP_000624945.1		MerR family transcriptional regulator	4	4	1	1	1782				368	368	368	34e9a6678acca924fbf24c6bf5608d56_2498	455a00a194b6732c15d9cd1ede6a821e_2548	8aa1aaefd30e370458343f447b9298d5_2629	S_aureus_12_01711
phnC		phosphonate ABC transporter ATP-binding protein	4	4	1	1	1249				773	773	773	34e9a6678acca924fbf24c6bf5608d56_215	455a00a194b6732c15d9cd1ede6a821e_186	8aa1aaefd30e370458343f447b9298d5_350	S_aureus_12_00242
isdD		iron-regulated surface determinant protein IsdD	4	4	1	1	2439				1076	1076	1076	34e9a6678acca924fbf24c6bf5608d56_2135	455a00a194b6732c15d9cd1ede6a821e_2185	8aa1aaefd30e370458343f447b9298d5_2266	S_aureus_12_02493
gap		type I glyceraldehyde-3-phosphate dehydrogenase	4	4	1	1	2339				1010	1010	1010	34e9a6678acca924fbf24c6bf5608d56_1526	455a00a194b6732c15d9cd1ede6a821e_1629	8aa1aaefd30e370458343f447b9298d5_1658	S_aureus_12_01310
rpe		ribulose-phosphate 3-epimerase	4	4	1	1	1696				644	644	644	34e9a6678acca924fbf24c6bf5608d56_2324	455a00a194b6732c15d9cd1ede6a821e_2374	8aa1aaefd30e370458343f447b9298d5_2455	S_aureus_12_01796
betB		betaine-aldehyde dehydrogenase	4	4	1	1	520				1490	1490	1490	34e9a6678acca924fbf24c6bf5608d56_5375	455a00a194b6732c15d9cd1ede6a821e_5415	8aa1aaefd30e370458343f447b9298d5_5396	S_aureus_12_00419
clpL		ATP-dependent Clp protease ATP-binding subunit ClpL	4	4	1	1	581				2105	2105	2105	34e9a6678acca924fbf24c6bf5608d56_5247	455a00a194b6732c15d9cd1ede6a821e_5289	8aa1aaefd30e370458343f447b9298d5_5270	S_aureus_12_00360
WP_001801476.1		prolyl oligopeptidase family serine peptidase	4	4	1	1	188				746	770	752	34e9a6678acca924fbf24c6bf5608d56_3647	455a00a194b6732c15d9cd1ede6a821e_3727	8aa1aaefd30e370458343f447b9298d5_3616	S_aureus_12_01874
WP_000449073.1		protein-ADP-ribose hydrolase	4	4	1	1	350				800	800	800	34e9a6678acca924fbf24c6bf5608d56_589	455a00a194b6732c15d9cd1ede6a821e_585	8aa1aaefd30e370458343f447b9298d5_716	S_aureus_12_00065
WP_000598264.1		CDP-glycerol glycerophosphotransferase family protein	4	4	1	1	1915				1169	1169	1169	34e9a6678acca924fbf24c6bf5608d56_431	455a00a194b6732c15d9cd1ede6a821e_400	8aa1aaefd30e370458343f447b9298d5_564	S_aureus_12_00139
fosB		FosB/FosD family fosfomycin resistance bacillithiol transferase	4	4	1	1	796				419	419	419	34e9a6678acca924fbf24c6bf5608d56_4805	455a00a194b6732c15d9cd1ede6a821e_4851	8aa1aaefd30e370458343f447b9298d5_4822	S_aureus_12_00738
WP_000390575.1		metal-sulfur cluster assembly factor	4	4	1	1	1950				308	308	308	34e9a6678acca924fbf24c6bf5608d56_1792	455a00a194b6732c15d9cd1ede6a821e_1845	8aa1aaefd30e370458343f447b9298d5_1920	S_aureus_12_02629
WP_000348297.1		DNA-3-methyladenine glycosylase	4	4	1	1	785				608	608	608	34e9a6678acca924fbf24c6bf5608d56_4827	455a00a194b6732c15d9cd1ede6a821e_4873	8aa1aaefd30e370458343f447b9298d5_4844	S_aureus_12_00748
WP_001041925.1		alpha-glucosidase	4	4	1	1	1486				1649	1649	1649	34e9a6678acca924fbf24c6bf5608d56_3069	455a00a194b6732c15d9cd1ede6a821e_3140	8aa1aaefd30e370458343f447b9298d5_3045	S_aureus_12_01038
clpP		ATP-dependent Clp endopeptidase proteolytic subunit ClpP	4	4	1	1	2334				587	587	587	34e9a6678acca924fbf24c6bf5608d56_1516	455a00a194b6732c15d9cd1ede6a821e_1619	8aa1aaefd30e370458343f447b9298d5_1648	S_aureus_12_01315
WP_000472237.1		ABC transporter permease	4	4	1	1	656				935	935	935	34e9a6678acca924fbf24c6bf5608d56_5091	455a00a194b6732c15d9cd1ede6a821e_5135	8aa1aaefd30e370458343f447b9298d5_5110	S_aureus_12_00872
upp		uracil phosphoribosyltransferase	4	4	1	1	2860				629	629	629	34e9a6678acca924fbf24c6bf5608d56_4335	455a00a194b6732c15d9cd1ede6a821e_4376	8aa1aaefd30e370458343f447b9298d5_4356	S_aureus_12_02007
WP_000648736.1		mannitol-1-phosphate 5-dehydrogenase	4	4	1	1	2906				1106	1106	1106	34e9a6678acca924fbf24c6bf5608d56_4425	455a00a194b6732c15d9cd1ede6a821e_4468	8aa1aaefd30e370458343f447b9298d5_4444	S_aureus_12_02049
WP_016186903.1		DUF4909 domain-containing protein	4	4	1	1	193				455	482	461	34e9a6678acca924fbf24c6bf5608d56_3657	455a00a194b6732c15d9cd1ede6a821e_3737	8aa1aaefd30e370458343f447b9298d5_3626	S_aureus_12_01879
WP_000074001.1		MerR family transcriptional regulator	4	4	1	1	624				731	731	731	34e9a6678acca924fbf24c6bf5608d56_5159	455a00a194b6732c15d9cd1ede6a821e_5201	8aa1aaefd30e370458343f447b9298d5_5182	S_aureus_12_00318
dhaM		PTS-dependent dihydroxyacetone kinase phosphotransferase subunit DhaM	4	4	1	1	1144				362	362	362	34e9a6678acca924fbf24c6bf5608d56_1273	455a00a194b6732c15d9cd1ede6a821e_1310	8aa1aaefd30e370458343f447b9298d5_1407	S_aureus_12_01433
WP_000450253.1		hemolysin family protein	4	4	1	1	2065				1349	1349	1349	34e9a6678acca924fbf24c6bf5608d56_1377	455a00a194b6732c15d9cd1ede6a821e_1480	8aa1aaefd30e370458343f447b9298d5_1511	S_aureus_12_01383
cap8L		type 8 capsular polysaccharide synthesis protein Cap8L	4	4	1	1	1837				1205	1205	1205	34e9a6678acca924fbf24c6bf5608d56_251	455a00a194b6732c15d9cd1ede6a821e_222	8aa1aaefd30e370458343f447b9298d5_386	S_aureus_12_00224
WP_000952030.1		DNA photolyase family protein	4	4	1	1	2076				1373	1373	1373	34e9a6678acca924fbf24c6bf5608d56_1355	455a00a194b6732c15d9cd1ede6a821e_1458	8aa1aaefd30e370458343f447b9298d5_1489	S_aureus_12_01394
WP_001123310.1		thiol-disulfide oxidoreductase DCC family protein	4	4	1	1	2888				413	413	413	34e9a6678acca924fbf24c6bf5608d56_4391	455a00a194b6732c15d9cd1ede6a821e_4432	8aa1aaefd30e370458343f447b9298d5_4412	S_aureus_12_02035
WP_001143497.1		iron-sulfur cluster assembly accessory protein	4	4	1	1	2245				359	359	359	34e9a6678acca924fbf24c6bf5608d56_1726	455a00a194b6732c15d9cd1ede6a821e_1779	8aa1aaefd30e370458343f447b9298d5_1854	S_aureus_12_01217
WP_001052491.1		anti-sigma factor antagonist	4	4	1	1	2814				326	326	326	34e9a6678acca924fbf24c6bf5608d56_4240	455a00a194b6732c15d9cd1ede6a821e_4281	8aa1aaefd30e370458343f447b9298d5_4259	S_aureus_12_01962
WP_001017131.1		sensor histidine kinase	4	4	1	1	1060				1043	1043	1043	34e9a6678acca924fbf24c6bf5608d56_3964	455a00a194b6732c15d9cd1ede6a821e_4050	8aa1aaefd30e370458343f447b9298d5_3930	S_aureus_12_02199
sdpC		CPBP family intramembrane metalloprotease SdpC	4	4	1	1	794				1259	1259	1259	34e9a6678acca924fbf24c6bf5608d56_4809	455a00a194b6732c15d9cd1ede6a821e_4855	8aa1aaefd30e370458343f447b9298d5_4826	S_aureus_12_00740
WP_001794016.1		excalibur calcium-binding domain-containing protein	4	4	1	1	194				614	650	641	34e9a6678acca924fbf24c6bf5608d56_3659	455a00a194b6732c15d9cd1ede6a821e_3739	8aa1aaefd30e370458343f447b9298d5_3628	S_aureus_12_01880
WP_000216874.1		ABC transporter ATP-binding protein	4	4	1	1	2994				740	740	740	34e9a6678acca924fbf24c6bf5608d56_3777	455a00a194b6732c15d9cd1ede6a821e_3866	8aa1aaefd30e370458343f447b9298d5_3746	S_aureus_12_01932
WP_001060841.1		Nramp family divalent metal transporter	4	4	1	1	2193				1352	1352	1352	34e9a6678acca924fbf24c6bf5608d56_2083	455a00a194b6732c15d9cd1ede6a821e_2133	8aa1aaefd30e370458343f447b9298d5_2214	S_aureus_12_01592
WP_000215236.1		Asp23/Gls24 family envelope stress response protein	4	4	1	1	2928				509	509	509	34e9a6678acca924fbf24c6bf5608d56_4500	455a00a194b6732c15d9cd1ede6a821e_4543	8aa1aaefd30e370458343f447b9298d5_4519	S_aureus_12_00596
WP_000977031.1		LytTR family DNA-binding domain-containing protein	4	4	1	1	765				443	443	443	34e9a6678acca924fbf24c6bf5608d56_4869	455a00a194b6732c15d9cd1ede6a821e_4915	8aa1aaefd30e370458343f447b9298d5_4888	S_aureus_12_00768
WP_000398672.1		beta-class phenol-soluble modulin	4	4	1	1	2028				134	134	134	34e9a6678acca924fbf24c6bf5608d56_2228	455a00a194b6732c15d9cd1ede6a821e_2278	8aa1aaefd30e370458343f447b9298d5_2359	S_aureus_12_02569
WP_000183734.1		ring-cleaving dioxygenase	4	4	1	1	610				968	968	968	34e9a6678acca924fbf24c6bf5608d56_5187	455a00a194b6732c15d9cd1ede6a821e_5229	8aa1aaefd30e370458343f447b9298d5_5210	S_aureus_12_00332
WP_000583207.1		DUF5080 family protein	4	4	1	1	289				587	587	587	34e9a6678acca924fbf24c6bf5608d56_515	455a00a194b6732c15d9cd1ede6a821e_486	8aa1aaefd30e370458343f447b9298d5_648	S_aureus_12_00099
czrA		Zn(II)-responsive metalloregulatory transcriptional repressor CzrA	4	4	1	1	2893				320	320	320	34e9a6678acca924fbf24c6bf5608d56_4401	455a00a194b6732c15d9cd1ede6a821e_4442	8aa1aaefd30e370458343f447b9298d5_4422	S_aureus_12_02040
WP_000047745.1		hypothetical protein	4	4	1	1	1344				203	203	203	34e9a6678acca924fbf24c6bf5608d56_1207	455a00a194b6732c15d9cd1ede6a821e_1244	8aa1aaefd30e370458343f447b9298d5_1341	S_aureus_12_01465
WP_000340133.1		UDP-N-acetylmuramoyl-L-alanyl-D-glutamate--L-lysine ligase	4	4	1	1	2535				1484	1484	1484	34e9a6678acca924fbf24c6bf5608d56_1893	455a00a194b6732c15d9cd1ede6a821e_1944	8aa1aaefd30e370458343f447b9298d5_2021	S_aureus_12_01680
WP_001036447.1		DUF1433 domain-containing protein	4	4	1	1	207				359	377	372	34e9a6678acca924fbf24c6bf5608d56_3687	455a00a194b6732c15d9cd1ede6a821e_3771	8aa1aaefd30e370458343f447b9298d5_3656	S_aureus_12_01893
WP_000197262.1		5'-3'-deoxyribonucleotidase	4	4	1	1	2287				542	542	542	34e9a6678acca924fbf24c6bf5608d56_1423	455a00a194b6732c15d9cd1ede6a821e_1526	8aa1aaefd30e370458343f447b9298d5_1557	S_aureus_12_01361
WP_000811163.1		thioredoxin family protein	4	4	1	1	79				311	311	311	34e9a6678acca924fbf24c6bf5608d56_3557	455a00a194b6732c15d9cd1ede6a821e_3623	8aa1aaefd30e370458343f447b9298d5_3526	S_aureus_12_01830
WP_000681966.1		hypothetical protein	4	4	1	1	1115				176	176	176	34e9a6678acca924fbf24c6bf5608d56_4074	455a00a194b6732c15d9cd1ede6a821e_4160	8aa1aaefd30e370458343f447b9298d5_4040	S_aureus_12_02149
WP_000747804.1		DUF1433 domain-containing protein	4	4	1	1	201				446	446	446	34e9a6678acca924fbf24c6bf5608d56_3673	455a00a194b6732c15d9cd1ede6a821e_3755	8aa1aaefd30e370458343f447b9298d5_3642	S_aureus_12_01887
rpsF		30S ribosomal protein S6	4	4	1	1	310				296	296	296	34e9a6678acca924fbf24c6bf5608d56_668	455a00a194b6732c15d9cd1ede6a821e_664	8aa1aaefd30e370458343f447b9298d5_795	S_aureus_12_00025
WP_000120368.1		inorganic phosphate transporter	4	4	1	1	1156				1007	1007	1007	34e9a6678acca924fbf24c6bf5608d56_1297	455a00a194b6732c15d9cd1ede6a821e_1334	8aa1aaefd30e370458343f447b9298d5_1431	S_aureus_12_01421
WP_001026125.1		MBL fold metallo-hydrolase	4	4	1	1	651				767	767	767	34e9a6678acca924fbf24c6bf5608d56_5101	455a00a194b6732c15d9cd1ede6a821e_5145	8aa1aaefd30e370458343f447b9298d5_5120	S_aureus_12_00877
WP_000612132.1		urease subunit beta	4	4	1	1	841				410	410	410	34e9a6678acca924fbf24c6bf5608d56_4714	455a00a194b6732c15d9cd1ede6a821e_4760	8aa1aaefd30e370458343f447b9298d5_4731	S_aureus_12_00694
cap8P		type 8 capsular polysaccharide synthesis protein Cap8P	4	4	1	1	1841				1145	1145	1145	34e9a6678acca924fbf24c6bf5608d56_259	455a00a194b6732c15d9cd1ede6a821e_230	8aa1aaefd30e370458343f447b9298d5_394	S_aureus_12_00220
WP_000985898.1		LLM class flavin-dependent oxidoreductase	4	4	1	1	232				1013	1013	1013	34e9a6678acca924fbf24c6bf5608d56_3306	455a00a194b6732c15d9cd1ede6a821e_3377	8aa1aaefd30e370458343f447b9298d5_3278	S_aureus_12_01154
WP_000028587.1		type I restriction-modification system subunit M	4	4	1	1	2969				1556	1739	1601	34e9a6678acca924fbf24c6bf5608d56_3699	455a00a194b6732c15d9cd1ede6a821e_3788	8aa1aaefd30e370458343f447b9298d5_3668	S_aureus_12_01899
mreD		rod shape-determining protein MreD	4	4	1	1	257				530	530	530	34e9a6678acca924fbf24c6bf5608d56_3360	455a00a194b6732c15d9cd1ede6a821e_3431	8aa1aaefd30e370458343f447b9298d5_3332	S_aureus_12_01178
WP_000737195.1		EfeM/EfeO family lipoprotein	4	4	1	1	332				854	854	854	34e9a6678acca924fbf24c6bf5608d56_623	455a00a194b6732c15d9cd1ede6a821e_619	8aa1aaefd30e370458343f447b9298d5_750	S_aureus_12_00047
WP_001134201.1		stage 0 sporulation family protein	4	4	1	1	2671				803	803	803	34e9a6678acca924fbf24c6bf5608d56_878	455a00a194b6732c15d9cd1ede6a821e_924	8aa1aaefd30e370458343f447b9298d5_1009	S_aureus_12_02545
phnE		phosphonate ABC transporter, permease protein PhnE	4	4	1	1	1250				800	800	800	34e9a6678acca924fbf24c6bf5608d56_213	455a00a194b6732c15d9cd1ede6a821e_184	8aa1aaefd30e370458343f447b9298d5_348	S_aureus_12_00243
WP_000697220.1		GspE/PulE family protein	4	4	1	1	1446				974	974	974	34e9a6678acca924fbf24c6bf5608d56_3152	455a00a194b6732c15d9cd1ede6a821e_3223	8aa1aaefd30e370458343f447b9298d5_3126	S_aureus_12_01077
ybaK		Cys-tRNA(Pro) deacylase	4	4	1	1	2070				482	482	482	34e9a6678acca924fbf24c6bf5608d56_1367	455a00a194b6732c15d9cd1ede6a821e_1470	8aa1aaefd30e370458343f447b9298d5_1501	S_aureus_12_01388
WP_000258725.1		aspartate kinase	4	4	1	1	1997				1205	1205	1205	34e9a6678acca924fbf24c6bf5608d56_2705	455a00a194b6732c15d9cd1ede6a821e_2790	8aa1aaefd30e370458343f447b9298d5_2809	S_aureus_12_02387
WP_000035058.1		peptidylprolyl isomerase	4	4	1	1	2231				593	593	593	34e9a6678acca924fbf24c6bf5608d56_1754	455a00a194b6732c15d9cd1ede6a821e_1807	8aa1aaefd30e370458343f447b9298d5_1882	S_aureus_12_01203
WP_001291490.1		M20 family metallopeptidase	4	4	1	1	2881				1184	1184	1184	34e9a6678acca924fbf24c6bf5608d56_4377	455a00a194b6732c15d9cd1ede6a821e_4418	8aa1aaefd30e370458343f447b9298d5_4398	S_aureus_12_02028
group_1639	deoC	deoxyribose-phosphate aldolase	4	4	1	1	1253				662	662	662	34e9a6678acca924fbf24c6bf5608d56_207	455a00a194b6732c15d9cd1ede6a821e_178	8aa1aaefd30e370458343f447b9298d5_342	S_aureus_12_00246
splB		serine protease	4	4	1	1	2975				131	164	139	34e9a6678acca924fbf24c6bf5608d56_3715	455a00a194b6732c15d9cd1ede6a821e_3804	8aa1aaefd30e370458343f447b9298d5_3684	S_aureus_12_01906
graR		response regulator transcription factor GraR/ApsR	4	4	1	1	1151				674	674	674	34e9a6678acca924fbf24c6bf5608d56_1287	455a00a194b6732c15d9cd1ede6a821e_1324	8aa1aaefd30e370458343f447b9298d5_1421	S_aureus_12_01426
ftsW		cell division protein FtsW	4	4	1	1	2201				1226	1226	1226	34e9a6678acca924fbf24c6bf5608d56_2099	455a00a194b6732c15d9cd1ede6a821e_2149	8aa1aaefd30e370458343f447b9298d5_2230	S_aureus_12_01585
cdaA		diadenylate cyclase CdaA	4	4	1	1	2909				809	809	809	34e9a6678acca924fbf24c6bf5608d56_4433	455a00a194b6732c15d9cd1ede6a821e_4476	8aa1aaefd30e370458343f447b9298d5_4452	S_aureus_12_02054
WP_000678227.1		SDR family oxidoreductase	4	4	1	1	1491				755	755	755	34e9a6678acca924fbf24c6bf5608d56_3059	455a00a194b6732c15d9cd1ede6a821e_3130	8aa1aaefd30e370458343f447b9298d5_3035	S_aureus_12_01033
WP_000617348.1		GNAT family N-acetyltransferase	4	4	1	1	602				491	491	491	34e9a6678acca924fbf24c6bf5608d56_5205	455a00a194b6732c15d9cd1ede6a821e_5247	8aa1aaefd30e370458343f447b9298d5_5228	S_aureus_12_00340
WP_000377064.1		GIY-YIG nuclease family protein	4	4	1	1	2674				248	248	248	34e9a6678acca924fbf24c6bf5608d56_884	455a00a194b6732c15d9cd1ede6a821e_930	8aa1aaefd30e370458343f447b9298d5_1015	S_aureus_12_02542
WP_000806123.1		ABC transporter permease	4	4	1	1	2185				920	920	920	34e9a6678acca924fbf24c6bf5608d56_483	455a00a194b6732c15d9cd1ede6a821e_452	8aa1aaefd30e370458343f447b9298d5_616	S_aureus_12_00115
WP_000867948.1		carbon-nitrogen family hydrolase	4	4	1	1	2779				785	785	785	34e9a6678acca924fbf24c6bf5608d56_4152	455a00a194b6732c15d9cd1ede6a821e_4196	8aa1aaefd30e370458343f447b9298d5_4174	S_aureus_12_02329
eap		extracellular adherence protein Eap/Map	4	4	1	1	2765				2069	2069	2069	34e9a6678acca924fbf24c6bf5608d56_4080	455a00a194b6732c15d9cd1ede6a821e_4168	8aa1aaefd30e370458343f447b9298d5_4046	S_aureus_12_02147
WP_000781979.1		cyclic-di-AMP receptor	4	4	1	1	2669				329	329	329	34e9a6678acca924fbf24c6bf5608d56_874	455a00a194b6732c15d9cd1ede6a821e_920	8aa1aaefd30e370458343f447b9298d5_1005	S_aureus_12_02547
WP_147612242.1		exotoxin	4	4	1	1	2986				764	782	777	34e9a6678acca924fbf24c6bf5608d56_3737	455a00a194b6732c15d9cd1ede6a821e_3826	8aa1aaefd30e370458343f447b9298d5_3706	S_aureus_12_01917
WP_001002343.1		hypothetical protein	4	4	1	1	1799				206	206	206	34e9a6678acca924fbf24c6bf5608d56_2506	455a00a194b6732c15d9cd1ede6a821e_2586	8aa1aaefd30e370458343f447b9298d5_2637	S_aureus_12_01707
dapA		4-hydroxy-tetrahydrodipicolinate synthase	4	4	1	1	1995				887	887	887	34e9a6678acca924fbf24c6bf5608d56_2709	455a00a194b6732c15d9cd1ede6a821e_2794	8aa1aaefd30e370458343f447b9298d5_2813	S_aureus_12_02389
feoB		ferrous iron transport protein B	4	4	1	1	579				1994	1994	1994	34e9a6678acca924fbf24c6bf5608d56_5251	455a00a194b6732c15d9cd1ede6a821e_5293	8aa1aaefd30e370458343f447b9298d5_5274	S_aureus_12_00362
WP_001283968.1		winged helix-turn-helix transcriptional regulator	4	4	1	1	364				1118	1118	1118	34e9a6678acca924fbf24c6bf5608d56_559	455a00a194b6732c15d9cd1ede6a821e_555	8aa1aaefd30e370458343f447b9298d5_686	S_aureus_12_00080
WP_001131841.1		fructose-bisphosphate aldolase	4	4	1	1	2873				860	860	860	34e9a6678acca924fbf24c6bf5608d56_4361	455a00a194b6732c15d9cd1ede6a821e_4402	8aa1aaefd30e370458343f447b9298d5_4382	S_aureus_12_02020
WP_000782834.1		superantigen-like protein SSL2	4	4	1	1	1207				701	701	701	34e9a6678acca924fbf24c6bf5608d56_739	455a00a194b6732c15d9cd1ede6a821e_781	8aa1aaefd30e370458343f447b9298d5_866	S_aureus_12_02279
WP_000037500.1		DUF1433 domain-containing protein	4	4	1	1	647				413	413	413	34e9a6678acca924fbf24c6bf5608d56_5109	455a00a194b6732c15d9cd1ede6a821e_5153	8aa1aaefd30e370458343f447b9298d5_5128	S_aureus_12_00881
WP_000365352.1		HAD family hydrolase	4	4	1	1	1352				719	719	719	34e9a6678acca924fbf24c6bf5608d56_1191	455a00a194b6732c15d9cd1ede6a821e_1228	8aa1aaefd30e370458343f447b9298d5_1325	S_aureus_12_01473
WP_001220806.1		carboxylesterase	4	4	1	1	2642				734	734	734	34e9a6678acca924fbf24c6bf5608d56_803	455a00a194b6732c15d9cd1ede6a821e_849	8aa1aaefd30e370458343f447b9298d5_934	S_aureus_12_02248
WP_000646219.1		SDR family NAD(P)-dependent oxidoreductase	4	4	1	1	1755				704	704	704	34e9a6678acca924fbf24c6bf5608d56_2444	455a00a194b6732c15d9cd1ede6a821e_2494	8aa1aaefd30e370458343f447b9298d5_2575	S_aureus_12_01738
WP_001236371.1		aromatic acid exporter family protein	4	4	1	1	3011				1094	1145	1106	34e9a6678acca924fbf24c6bf5608d56_3924	455a00a194b6732c15d9cd1ede6a821e_4010	8aa1aaefd30e370458343f447b9298d5_3890	S_aureus_12_02219
WP_001037039.1		DUF1433 domain-containing protein	4	4	1	1	204				443	443	443	34e9a6678acca924fbf24c6bf5608d56_3679	455a00a194b6732c15d9cd1ede6a821e_3761	8aa1aaefd30e370458343f447b9298d5_3648	S_aureus_12_01889
WP_000401409.1		YuzD family protein	4	4	1	1	2248				323	323	323	34e9a6678acca924fbf24c6bf5608d56_1720	455a00a194b6732c15d9cd1ede6a821e_1773	8aa1aaefd30e370458343f447b9298d5_1848	S_aureus_12_01220
WP_000524902.1		YqeG family HAD IIIA-type phosphatase	4	4	1	1	1393				527	527	527	34e9a6678acca924fbf24c6bf5608d56_3258	455a00a194b6732c15d9cd1ede6a821e_3329	8aa1aaefd30e370458343f447b9298d5_3230	S_aureus_12_01129
WP_000923764.1		ABC transporter ATP-binding protein	4	4	1	1	504				755	755	755	34e9a6678acca924fbf24c6bf5608d56_5409	455a00a194b6732c15d9cd1ede6a821e_5449	8aa1aaefd30e370458343f447b9298d5_5430	S_aureus_12_00430
WP_001248939.1		YvcK family protein	4	4	1	1	2332				995	995	995	34e9a6678acca924fbf24c6bf5608d56_1512	455a00a194b6732c15d9cd1ede6a821e_1615	8aa1aaefd30e370458343f447b9298d5_1644	S_aureus_12_01318
WP_001151997.1		ferredoxin	4	4	1	1	1623				248	248	248	34e9a6678acca924fbf24c6bf5608d56_2890	455a00a194b6732c15d9cd1ede6a821e_2975	8aa1aaefd30e370458343f447b9298d5_2994	S_aureus_12_00944
WP_000161541.1		D-lactate dehydrogenase	4	4	1	1	605				992	992	992	34e9a6678acca924fbf24c6bf5608d56_5197	455a00a194b6732c15d9cd1ede6a821e_5239	8aa1aaefd30e370458343f447b9298d5_5220	S_aureus_12_00337
WP_001038766.1		serine protease	4	4	1	1	2973				716	716	716	34e9a6678acca924fbf24c6bf5608d56_3711	455a00a194b6732c15d9cd1ede6a821e_3800	8aa1aaefd30e370458343f447b9298d5_3680	S_aureus_12_01904
WP_000020856.1		YlxQ family RNA-binding protein	4	4	1	1	1743				317	317	317	34e9a6678acca924fbf24c6bf5608d56_2420	455a00a194b6732c15d9cd1ede6a821e_2470	8aa1aaefd30e370458343f447b9298d5_2551	S_aureus_12_01750
dltB		PG:teichoic acid D-alanyltransferase DltB	4	4	1	1	2252				1214	1214	1214	34e9a6678acca924fbf24c6bf5608d56_1712	455a00a194b6732c15d9cd1ede6a821e_1765	8aa1aaefd30e370458343f447b9298d5_1840	S_aureus_12_01224
WP_000180460.1		DUF1128 family protein	4	4	1	1	1055				200	206	201	34e9a6678acca924fbf24c6bf5608d56_3954	455a00a194b6732c15d9cd1ede6a821e_4040	8aa1aaefd30e370458343f447b9298d5_3920	S_aureus_12_02204
WP_001242102.1		hypothetical protein	4	4	1	1	394				347	347	347	34e9a6678acca924fbf24c6bf5608d56_1863	455a00a194b6732c15d9cd1ede6a821e_1914	8aa1aaefd30e370458343f447b9298d5_1991	S_aureus_12_01695
rplX		50S ribosomal protein L24	4	4	1	1	892				317	317	317	34e9a6678acca924fbf24c6bf5608d56_4612	455a00a194b6732c15d9cd1ede6a821e_4658	8aa1aaefd30e370458343f447b9298d5_4627	S_aureus_12_00646
WP_000966146.1		CcdC family protein	4	4	1	1	2510				467	467	467	34e9a6678acca924fbf24c6bf5608d56_2608	455a00a194b6732c15d9cd1ede6a821e_2694	8aa1aaefd30e370458343f447b9298d5_2713	S_aureus_12_02447
sceD		lytic transglycosylase SceD	4	4	1	1	2844				695	695	695	34e9a6678acca924fbf24c6bf5608d56_4303	455a00a194b6732c15d9cd1ede6a821e_4344	8aa1aaefd30e370458343f447b9298d5_4322	S_aureus_12_01991
WP_000492901.1		CPBP family intramembrane metalloprotease	4	4	1	1	179				620	620	620	34e9a6678acca924fbf24c6bf5608d56_3628	455a00a194b6732c15d9cd1ede6a821e_3708	8aa1aaefd30e370458343f447b9298d5_3597	S_aureus_12_01865
WP_000675909.1		NAD-dependent malic enzyme	4	4	1	1	2335				1634	1634	1634	34e9a6678acca924fbf24c6bf5608d56_1518	455a00a194b6732c15d9cd1ede6a821e_1621	8aa1aaefd30e370458343f447b9298d5_1650	S_aureus_12_01314
proC		pyrroline-5-carboxylate reductase	4	4	1	1	1490				815	815	815	34e9a6678acca924fbf24c6bf5608d56_3061	455a00a194b6732c15d9cd1ede6a821e_3132	8aa1aaefd30e370458343f447b9298d5_3037	S_aureus_12_01034
WP_001032833.1		N-acetylglucosaminidase	4	4	1	1	173				854	854	854	34e9a6678acca924fbf24c6bf5608d56_3616	455a00a194b6732c15d9cd1ede6a821e_3696	8aa1aaefd30e370458343f447b9298d5_3585	S_aureus_12_01859
WP_001113406.1		threonine/serine exporter ThrE family protein	4	4	1	1	2309				761	761	761	34e9a6678acca924fbf24c6bf5608d56_1467	455a00a194b6732c15d9cd1ede6a821e_1570	8aa1aaefd30e370458343f447b9298d5_1599	S_aureus_12_01340
WP_000120549.1		DUF2750 domain-containing protein	4	4	1	1	2879				671	671	671	34e9a6678acca924fbf24c6bf5608d56_4373	455a00a194b6732c15d9cd1ede6a821e_4414	8aa1aaefd30e370458343f447b9298d5_4394	S_aureus_12_02026
mgrA		HTH-type transcriptional regulator MgrA	4	4	1	1	2081				443	443	443	34e9a6678acca924fbf24c6bf5608d56_1345	455a00a194b6732c15d9cd1ede6a821e_1448	8aa1aaefd30e370458343f447b9298d5_1479	S_aureus_12_01399
WP_000958522.1		P-loop NTPase	4	4	1	1	2911				1064	1064	1064	34e9a6678acca924fbf24c6bf5608d56_4466	455a00a194b6732c15d9cd1ede6a821e_4509	8aa1aaefd30e370458343f447b9298d5_4485	S_aureus_12_00580
tagD		glycerol-3-phosphate cytidylyltransferase	4	4	1	1	1133				398	398	398	34e9a6678acca924fbf24c6bf5608d56_1251	455a00a194b6732c15d9cd1ede6a821e_1288	8aa1aaefd30e370458343f447b9298d5_1385	S_aureus_12_01443
group_1683	deoD	purine-nucleoside phosphorylase	4	4	1	1	2886				710	710	710	34e9a6678acca924fbf24c6bf5608d56_4387	455a00a194b6732c15d9cd1ede6a821e_4428	8aa1aaefd30e370458343f447b9298d5_4408	S_aureus_12_02033
WP_001245800.1		hypothetical protein	4	4	1	1	2029				197	197	197	34e9a6678acca924fbf24c6bf5608d56_2223	455a00a194b6732c15d9cd1ede6a821e_2273	8aa1aaefd30e370458343f447b9298d5_2354	S_aureus_12_02571
WP_000959276.1		competence protein CoiA	4	4	1	1	399				986	986	986	34e9a6678acca924fbf24c6bf5608d56_1853	455a00a194b6732c15d9cd1ede6a821e_1904	8aa1aaefd30e370458343f447b9298d5_1981	S_aureus_12_01700
rpsS		30S ribosomal protein S19	4	4	1	1	885				278	278	278	34e9a6678acca924fbf24c6bf5608d56_4626	455a00a194b6732c15d9cd1ede6a821e_4672	8aa1aaefd30e370458343f447b9298d5_4641	S_aureus_12_00653
WP_000974455.1		organic hydroperoxide resistance protein	4	4	1	1	2381				422	422	422	34e9a6678acca924fbf24c6bf5608d56_1591	455a00a194b6732c15d9cd1ede6a821e_1694	8aa1aaefd30e370458343f447b9298d5_1767	S_aureus_12_01257
murB		UDP-N-acetylmuramate dehydrogenase	4	4	1	1	2302				923	923	923	34e9a6678acca924fbf24c6bf5608d56_1453	455a00a194b6732c15d9cd1ede6a821e_1556	8aa1aaefd30e370458343f447b9298d5_1585	S_aureus_12_01347
WP_000163995.1		6-phospho-beta-glucosidase	4	4	1	1	1902				1436	1436	1436	34e9a6678acca924fbf24c6bf5608d56_457	455a00a194b6732c15d9cd1ede6a821e_426	8aa1aaefd30e370458343f447b9298d5_590	S_aureus_12_00126
WP_001188074.1		C45 family autoproteolytic acyltransferase/hydolase	4	4	1	1	1105				1040	1112	1058	34e9a6678acca924fbf24c6bf5608d56_4054	455a00a194b6732c15d9cd1ede6a821e_4140	8aa1aaefd30e370458343f447b9298d5_4020	S_aureus_12_02159
WP_000613738.1		3'-5' exonuclease	4	4	1	1	1071				554	554	554	34e9a6678acca924fbf24c6bf5608d56_3986	455a00a194b6732c15d9cd1ede6a821e_4072	8aa1aaefd30e370458343f447b9298d5_3952	S_aureus_12_02190
pth		aminoacyl-tRNA hydrolase	4	4	1	1	2689				572	572	572	34e9a6678acca924fbf24c6bf5608d56_914	455a00a194b6732c15d9cd1ede6a821e_960	8aa1aaefd30e370458343f447b9298d5_1045	S_aureus_12_02528
WP_000161659.1		Xaa-Pro peptidase family protein	4	4	1	1	39				1055	1055	1055	34e9a6678acca924fbf24c6bf5608d56_3475	455a00a194b6732c15d9cd1ede6a821e_3541	8aa1aaefd30e370458343f447b9298d5_3442	S_aureus_12_02092
WP_001096631.1		alpha-ketoacid dehydrogenase subunit beta	4	4	1	1	1474				983	983	983	34e9a6678acca924fbf24c6bf5608d56_3095	455a00a194b6732c15d9cd1ede6a821e_3166	8aa1aaefd30e370458343f447b9298d5_3069	S_aureus_12_01050
WP_000664357.1		YbgA family protein	4	4	1	1	745				383	383	383	34e9a6678acca924fbf24c6bf5608d56_4909	455a00a194b6732c15d9cd1ede6a821e_4955	8aa1aaefd30e370458343f447b9298d5_4928	S_aureus_12_00787
ylqF		ribosome biogenesis GTPase YlqF	4	4	1	1	1717				884	884	884	34e9a6678acca924fbf24c6bf5608d56_2366	455a00a194b6732c15d9cd1ede6a821e_2416	8aa1aaefd30e370458343f447b9298d5_2497	S_aureus_12_01775
WP_001573509.1		YjiH family protein	4	4	1	1	2919				1370	1370	1370	34e9a6678acca924fbf24c6bf5608d56_4482	455a00a194b6732c15d9cd1ede6a821e_4525	8aa1aaefd30e370458343f447b9298d5_4501	S_aureus_12_00588
uvrC		excinuclease ABC subunit UvrC	4	4	1	1	2455				1781	1781	1781	34e9a6678acca924fbf24c6bf5608d56_2167	455a00a194b6732c15d9cd1ede6a821e_2217	8aa1aaefd30e370458343f447b9298d5_2298	S_aureus_12_02479
WP_000088195.1		cysteine hydrolase	4	4	1	1	479				560	560	560	34e9a6678acca924fbf24c6bf5608d56_5457	455a00a194b6732c15d9cd1ede6a821e_5500	8aa1aaefd30e370458343f447b9298d5_5478	S_aureus_12_00453
WP_000005632.1		DASS family sodium-coupled anion symporter	4	4	1	1	2077				1553	1553	1553	34e9a6678acca924fbf24c6bf5608d56_1353	455a00a194b6732c15d9cd1ede6a821e_1456	8aa1aaefd30e370458343f447b9298d5_1487	S_aureus_12_01395
WP_000057557.1		tetratricopeptide repeat protein	4	5	1.25	1	2329				518	1439	1145	34e9a6678acca924fbf24c6bf5608d56_1506	455a00a194b6732c15d9cd1ede6a821e_1609	8aa1aaefd30e370458343f447b9298d5_1638	S_aureus_12_01321 S_aureus_12_01322
seu		staphylococcal enterotoxin type U	4	4	1	1	2983				785	785	785	34e9a6678acca924fbf24c6bf5608d56_3731	455a00a194b6732c15d9cd1ede6a821e_3820	8aa1aaefd30e370458343f447b9298d5_3700	S_aureus_12_01914
uvrB		excinuclease ABC subunit UvrB	4	4	1	1	2324				1985	1985	1985	34e9a6678acca924fbf24c6bf5608d56_1496	455a00a194b6732c15d9cd1ede6a821e_1599	8aa1aaefd30e370458343f447b9298d5_1628	S_aureus_12_01327
WP_001030125.1		YafY family transcriptional regulator	4	4	1	1	817				692	692	692	34e9a6678acca924fbf24c6bf5608d56_4762	455a00a194b6732c15d9cd1ede6a821e_4808	8aa1aaefd30e370458343f447b9298d5_4779	S_aureus_12_00717
yjbH		protease adaptor protein YjbH	4	4	1	1	397				806	806	806	34e9a6678acca924fbf24c6bf5608d56_1857	455a00a194b6732c15d9cd1ede6a821e_1908	8aa1aaefd30e370458343f447b9298d5_1985	S_aureus_12_01698
hfq		RNA chaperone Hfq	4	4	1	1	1778				233	233	233	34e9a6678acca924fbf24c6bf5608d56_2490	455a00a194b6732c15d9cd1ede6a821e_2540	8aa1aaefd30e370458343f447b9298d5_2621	S_aureus_12_01715
WP_001573519.1		hypothetical protein	4	4	1	1	2946				125	125	125	34e9a6678acca924fbf24c6bf5608d56_4538	455a00a194b6732c15d9cd1ede6a821e_4581	8aa1aaefd30e370458343f447b9298d5_4555	S_aureus_12_00614
ureC		urease subunit alpha	4	4	1	1	840				1715	1715	1715	34e9a6678acca924fbf24c6bf5608d56_4716	455a00a194b6732c15d9cd1ede6a821e_4762	8aa1aaefd30e370458343f447b9298d5_4733	S_aureus_12_00695
WP_000181127.1		YceI family protein	4	4	1	1	437				515	515	515	34e9a6678acca924fbf24c6bf5608d56_5537	455a00a194b6732c15d9cd1ede6a821e_5580	8aa1aaefd30e370458343f447b9298d5_5562	S_aureus_12_00495
WP_000594640.1		formate/nitrite transporter family protein	4	4	1	1	722				824	824	824	34e9a6678acca924fbf24c6bf5608d56_4955	455a00a194b6732c15d9cd1ede6a821e_5003	8aa1aaefd30e370458343f447b9298d5_4974	S_aureus_12_00810
WP_000787672.1		phosphate/phosphite/phosphonate ABC transporter substrate-binding protein	4	4	1	1	1248				956	956	956	34e9a6678acca924fbf24c6bf5608d56_217	455a00a194b6732c15d9cd1ede6a821e_188	8aa1aaefd30e370458343f447b9298d5_352	S_aureus_12_00241
WP_001283316.1		ATP-dependent RecD-like DNA helicase	4	4	1	1	228				2477	2477	2477	34e9a6678acca924fbf24c6bf5608d56_3298	455a00a194b6732c15d9cd1ede6a821e_3369	8aa1aaefd30e370458343f447b9298d5_3270	S_aureus_12_01150
WP_001118970.1		YlaN family protein	4	4	1	1	2200				275	275	275	34e9a6678acca924fbf24c6bf5608d56_2097	455a00a194b6732c15d9cd1ede6a821e_2147	8aa1aaefd30e370458343f447b9298d5_2228	S_aureus_12_01586
purM		phosphoribosylformylglycinamidine cyclo-ligase	4	4	1	1	2594				1028	1028	1028	34e9a6678acca924fbf24c6bf5608d56_2014	455a00a194b6732c15d9cd1ede6a821e_2064	8aa1aaefd30e370458343f447b9298d5_2143	S_aureus_12_01625
WP_000839927.1		nucleotide pyrophosphohydrolase	4	4	1	1	1648				317	317	317	34e9a6678acca924fbf24c6bf5608d56_2840	455a00a194b6732c15d9cd1ede6a821e_2925	8aa1aaefd30e370458343f447b9298d5_2944	S_aureus_12_00922
WP_001080636.1		Abi family protein	4	4	1	1	2418				1007	1007	1007	34e9a6678acca924fbf24c6bf5608d56_674	455a00a194b6732c15d9cd1ede6a821e_716	8aa1aaefd30e370458343f447b9298d5_801	S_aureus_12_00022
WP_000110603.1		hypothetical protein	4	4	1	1	1418				698	698	698	34e9a6678acca924fbf24c6bf5608d56_3208	455a00a194b6732c15d9cd1ede6a821e_3279	8aa1aaefd30e370458343f447b9298d5_3182	S_aureus_12_01104
WP_000786746.1		ATP-binding cassette domain-containing protein	4	4	1	1	1966				941	941	941	34e9a6678acca924fbf24c6bf5608d56_1824	455a00a194b6732c15d9cd1ede6a821e_1877	8aa1aaefd30e370458343f447b9298d5_1952	S_aureus_12_02613
WP_000373076.1		mechanosensitive ion channel family protein	4	4	1	1	314				881	881	881	34e9a6678acca924fbf24c6bf5608d56_660	455a00a194b6732c15d9cd1ede6a821e_656	8aa1aaefd30e370458343f447b9298d5_787	S_aureus_12_00029
lacB		galactose-6-phosphate isomerase subunit LacB	4	4	1	1	2940				515	515	515	34e9a6678acca924fbf24c6bf5608d56_4524	455a00a194b6732c15d9cd1ede6a821e_4567	8aa1aaefd30e370458343f447b9298d5_4543	S_aureus_12_00608
WP_000733427.1		hypothetical protein	4	4	1	1	2090				389	389	389	34e9a6678acca924fbf24c6bf5608d56_1327	455a00a194b6732c15d9cd1ede6a821e_1430	8aa1aaefd30e370458343f447b9298d5_1461	S_aureus_12_01408
WP_000171798.1		hypothetical protein	4	4	1	1	2006				344	344	344	34e9a6678acca924fbf24c6bf5608d56_2686	455a00a194b6732c15d9cd1ede6a821e_2772	8aa1aaefd30e370458343f447b9298d5_2791	S_aureus_12_02378
recF		DNA replication/repair protein RecF	4	4	1	1	2137				1112	1112	1112	34e9a6678acca924fbf24c6bf5608d56_9	455a00a194b6732c15d9cd1ede6a821e_9	8aa1aaefd30e370458343f447b9298d5_9	S_aureus_12_00527
WP_000627550.1		DUF3969 family protein	4	4	1	1	197				344	344	344	34e9a6678acca924fbf24c6bf5608d56_3665	455a00a194b6732c15d9cd1ede6a821e_3745	8aa1aaefd30e370458343f447b9298d5_3634	S_aureus_12_01883
WP_000081597.1		hypothetical protein	4	4	1	1	1158				644	644	644	34e9a6678acca924fbf24c6bf5608d56_1301	455a00a194b6732c15d9cd1ede6a821e_1338	8aa1aaefd30e370458343f447b9298d5_1435	S_aureus_12_01419
moaA		GTP 3',8-cyclase MoaA	4	4	1	1	861				1022	1022	1022	34e9a6678acca924fbf24c6bf5608d56_4674	455a00a194b6732c15d9cd1ede6a821e_4720	8aa1aaefd30e370458343f447b9298d5_4689	S_aureus_12_00674
WP_000171861.1		hypothetical protein	4	4	1	1	262				284	284	284	34e9a6678acca924fbf24c6bf5608d56_3370	455a00a194b6732c15d9cd1ede6a821e_3441	8aa1aaefd30e370458343f447b9298d5_3342	S_aureus_12_01181
WP_001574556.1		thermonuclease family protein	4	4	1	1	2369				686	686	686	34e9a6678acca924fbf24c6bf5608d56_1567	455a00a194b6732c15d9cd1ede6a821e_1670	8aa1aaefd30e370458343f447b9298d5_1743	S_aureus_12_01269
trpC		indole-3-glycerol phosphate synthase TrpC	4	4	1	1	2018				782	782	782	34e9a6678acca924fbf24c6bf5608d56_2660	455a00a194b6732c15d9cd1ede6a821e_2746	8aa1aaefd30e370458343f447b9298d5_2765	S_aureus_12_02366
queF		preQ(1) synthase	4	4	1	1	2292				500	500	500	34e9a6678acca924fbf24c6bf5608d56_1433	455a00a194b6732c15d9cd1ede6a821e_1536	8aa1aaefd30e370458343f447b9298d5_1565	S_aureus_12_01357
WP_000870819.1		bacteriocin-associated integral membrane family protein	4	4	1	1	2549				1964	1964	1964	34e9a6678acca924fbf24c6bf5608d56_1928	455a00a194b6732c15d9cd1ede6a821e_1978	8aa1aaefd30e370458343f447b9298d5_2057	S_aureus_12_01666
hemC		hydroxymethylbilane synthase	4	4	1	1	272				926	926	926	34e9a6678acca924fbf24c6bf5608d56_3397	455a00a194b6732c15d9cd1ede6a821e_3464	8aa1aaefd30e370458343f447b9298d5_3365	S_aureus_12_02128
WP_000214067.1		truncated hemoglobin YjbI	4	4	1	1	396				365	365	365	34e9a6678acca924fbf24c6bf5608d56_1859	455a00a194b6732c15d9cd1ede6a821e_1910	8aa1aaefd30e370458343f447b9298d5_1987	S_aureus_12_01697
csoR		copper-sensing transcriptional repressor CsoR	4	4	1	1	2835				293	293	293	34e9a6678acca924fbf24c6bf5608d56_4284	455a00a194b6732c15d9cd1ede6a821e_4325	8aa1aaefd30e370458343f447b9298d5_4303	S_aureus_12_01982
WP_000828722.1		sodium-dependent transporter	4	4	1	1	2644				1337	1337	1337	34e9a6678acca924fbf24c6bf5608d56_807	455a00a194b6732c15d9cd1ede6a821e_853	8aa1aaefd30e370458343f447b9298d5_938	S_aureus_12_02247
WP_000833805.1		zinc ribbon domain-containing protein	4	4	1	1	772				1382	1382	1382	34e9a6678acca924fbf24c6bf5608d56_4855	455a00a194b6732c15d9cd1ede6a821e_4901	8aa1aaefd30e370458343f447b9298d5_4874	S_aureus_12_00761
menE		o-succinylbenzoate--CoA ligase	4	4	1	1	192				1478	1478	1478	34e9a6678acca924fbf24c6bf5608d56_3655	455a00a194b6732c15d9cd1ede6a821e_3735	8aa1aaefd30e370458343f447b9298d5_3624	S_aureus_12_01878
WP_000838499.1		DNA topoisomerase III	4	4	1	1	877				2135	2135	2135	34e9a6678acca924fbf24c6bf5608d56_4642	455a00a194b6732c15d9cd1ede6a821e_4688	8aa1aaefd30e370458343f447b9298d5_4657	S_aureus_12_00661
WP_001140799.1		type Z 30S ribosomal protein S14	4	4	1	1	894				185	185	185	34e9a6678acca924fbf24c6bf5608d56_4608	455a00a194b6732c15d9cd1ede6a821e_4654	8aa1aaefd30e370458343f447b9298d5_4623	S_aureus_12_00644
WP_000429675.1		amino acid permease	4	4	1	1	813				1379	1379	1379	34e9a6678acca924fbf24c6bf5608d56_4770	455a00a194b6732c15d9cd1ede6a821e_4816	8aa1aaefd30e370458343f447b9298d5_4787	S_aureus_12_00721
WP_001234988.1		RNA-binding S4 domain-containing protein	4	4	1	1	2693				263	263	263	34e9a6678acca924fbf24c6bf5608d56_922	455a00a194b6732c15d9cd1ede6a821e_968	8aa1aaefd30e370458343f447b9298d5_1053	S_aureus_12_02524
QOB72430.1		hypothetical protein	4	4	1	1	2777				1214	1265	1244	34e9a6678acca924fbf24c6bf5608d56_4148	455a00a194b6732c15d9cd1ede6a821e_4192	8aa1aaefd30e370458343f447b9298d5_4170	S_aureus_12_02327
WP_000435806.1		YfhH family protein	4	4	1	1	1047				314	314	314	34e9a6678acca924fbf24c6bf5608d56_3938	455a00a194b6732c15d9cd1ede6a821e_4024	8aa1aaefd30e370458343f447b9298d5_3904	S_aureus_12_02212
WP_000256335.1		LacI family DNA-binding transcriptional regulator	4	4	1	1	1485				1019	1019	1019	34e9a6678acca924fbf24c6bf5608d56_3071	455a00a194b6732c15d9cd1ede6a821e_3142	8aa1aaefd30e370458343f447b9298d5_3047	S_aureus_12_01039
WP_000477504.1		GNAT family N-acetyltransferase	4	4	1	1	1361				476	476	476	34e9a6678acca924fbf24c6bf5608d56_1171	455a00a194b6732c15d9cd1ede6a821e_1208	8aa1aaefd30e370458343f447b9298d5_1305	S_aureus_12_01482
WP_000273979.1		DUF86 domain-containing protein	4	4	1	1	2258				434	434	434	34e9a6678acca924fbf24c6bf5608d56_1700	455a00a194b6732c15d9cd1ede6a821e_1753	8aa1aaefd30e370458343f447b9298d5_1828	S_aureus_12_01229
isdE		heme ABC transporter substrate-binding protein IsdE	4	4	1	1	2440				878	878	878	34e9a6678acca924fbf24c6bf5608d56_2137	455a00a194b6732c15d9cd1ede6a821e_2187	8aa1aaefd30e370458343f447b9298d5_2268	S_aureus_12_02492
argB		acetylglutamate kinase	4	4	1	1	1858				770	770	770	34e9a6678acca924fbf24c6bf5608d56_293	455a00a194b6732c15d9cd1ede6a821e_264	8aa1aaefd30e370458343f447b9298d5_428	S_aureus_12_00203
WP_001253464.1		DUF2871 domain-containing protein	4	4	1	1	750				431	431	431	34e9a6678acca924fbf24c6bf5608d56_4899	455a00a194b6732c15d9cd1ede6a821e_4945	8aa1aaefd30e370458343f447b9298d5_4918	S_aureus_12_00782
WP_000897132.1		ATP-dependent Clp protease ATP-binding subunit	4	4	1	1	2756				2456	2456	2456	34e9a6678acca924fbf24c6bf5608d56_1010	455a00a194b6732c15d9cd1ede6a821e_1051	8aa1aaefd30e370458343f447b9298d5_1144	S_aureus_12_01560
rpsH		30S ribosomal protein S8	4	4	1	1	895				398	398	398	34e9a6678acca924fbf24c6bf5608d56_4606	455a00a194b6732c15d9cd1ede6a821e_4652	8aa1aaefd30e370458343f447b9298d5_4621	S_aureus_12_00643
WP_001080809.1		ABC transporter ATP-binding protein	4	4	1	1	1139				797	797	797	34e9a6678acca924fbf24c6bf5608d56_1263	455a00a194b6732c15d9cd1ede6a821e_1300	8aa1aaefd30e370458343f447b9298d5_1397	S_aureus_12_01438
hld		delta-hemolysin	4	4	1	1	2780				80	134	107	34e9a6678acca924fbf24c6bf5608d56_4154	455a00a194b6732c15d9cd1ede6a821e_4198	8aa1aaefd30e370458343f447b9298d5_4176	S_aureus_12_02330
WP_000111116.1		FeoB-associated Cys-rich membrane protein	4	4	1	1	580				170	170	170	34e9a6678acca924fbf24c6bf5608d56_5249	455a00a194b6732c15d9cd1ede6a821e_5291	8aa1aaefd30e370458343f447b9298d5_5272	S_aureus_12_00361
mnmA		tRNA 2-thiouridine(34) synthase MnmA	4	4	1	1	230				1118	1118	1118	34e9a6678acca924fbf24c6bf5608d56_3302	455a00a194b6732c15d9cd1ede6a821e_3373	8aa1aaefd30e370458343f447b9298d5_3274	S_aureus_12_01152
srtA		class A sortase SrtA	4	4	1	1	603				620	620	620	34e9a6678acca924fbf24c6bf5608d56_5203	455a00a194b6732c15d9cd1ede6a821e_5245	8aa1aaefd30e370458343f447b9298d5_5226	S_aureus_12_00339
ftsZ		cell division protein FtsZ	4	4	1	1	1377				1172	1172	1172	34e9a6678acca924fbf24c6bf5608d56_2252	455a00a194b6732c15d9cd1ede6a821e_2302	8aa1aaefd30e370458343f447b9298d5_2383	S_aureus_12_02557
efb		complement convertase inhibitor Efb	4	4	1	1	2467				497	497	497	34e9a6678acca924fbf24c6bf5608d56_2191	455a00a194b6732c15d9cd1ede6a821e_2241	8aa1aaefd30e370458343f447b9298d5_2322	S_aureus_12_02469
WP_000356967.1		hypothetical protein	4	4	1	1	1846				203	203	203	34e9a6678acca924fbf24c6bf5608d56_269	455a00a194b6732c15d9cd1ede6a821e_240	8aa1aaefd30e370458343f447b9298d5_404	S_aureus_12_00215
vraH		peptide resistance ABC transporter activity modulator VraH	4	4	1	1	423				191	191	191	34e9a6678acca924fbf24c6bf5608d56_5565	455a00a194b6732c15d9cd1ede6a821e_5608	8aa1aaefd30e370458343f447b9298d5_5590	S_aureus_12_00509
WP_000866741.1		glycerate kinase	4	4	1	1	2306				1124	1124	1124	34e9a6678acca924fbf24c6bf5608d56_1461	455a00a194b6732c15d9cd1ede6a821e_1564	8aa1aaefd30e370458343f447b9298d5_1593	S_aureus_12_01343
sucC		ADP-forming succinate--CoA ligase subunit beta	4	4	1	1	1719				1166	1166	1166	34e9a6678acca924fbf24c6bf5608d56_2370	455a00a194b6732c15d9cd1ede6a821e_2420	8aa1aaefd30e370458343f447b9298d5_2501	S_aureus_12_01773
dnaI		primosomal protein DnaI	4	4	1	1	16				920	920	920	34e9a6678acca924fbf24c6bf5608d56_3429	455a00a194b6732c15d9cd1ede6a821e_3495	8aa1aaefd30e370458343f447b9298d5_3396	S_aureus_12_02115
WP_001105709.1		accessory gene regulator AgrB	4	4	1	1	2781				563	617	576	34e9a6678acca924fbf24c6bf5608d56_4156	455a00a194b6732c15d9cd1ede6a821e_4200	8aa1aaefd30e370458343f447b9298d5_4178	S_aureus_12_02331
WP_001214655.1		ABC transporter substrate-binding protein	4	4	1	1	2922				983	983	983	34e9a6678acca924fbf24c6bf5608d56_4488	455a00a194b6732c15d9cd1ede6a821e_4531	8aa1aaefd30e370458343f447b9298d5_4507	S_aureus_12_00591
WP_000184732.1		iron ABC transporter permease	4	4	1	1	1140				1004	1004	1004	34e9a6678acca924fbf24c6bf5608d56_1265	455a00a194b6732c15d9cd1ede6a821e_1302	8aa1aaefd30e370458343f447b9298d5_1399	S_aureus_12_01437
WP_000154465.1		hypothetical protein	4	4	1	1	2075				284	284	284	34e9a6678acca924fbf24c6bf5608d56_1357	455a00a194b6732c15d9cd1ede6a821e_1460	8aa1aaefd30e370458343f447b9298d5_1491	S_aureus_12_01393
WP_000971979.1		hypothetical protein	4	4	1	1	810				191	191	191	34e9a6678acca924fbf24c6bf5608d56_4776	455a00a194b6732c15d9cd1ede6a821e_4822	8aa1aaefd30e370458343f447b9298d5_4793	S_aureus_12_00724
WP_000581791.1		heavy-metal-associated domain-containing protein	4	4	1	1	2834				209	209	209	34e9a6678acca924fbf24c6bf5608d56_4282	455a00a194b6732c15d9cd1ede6a821e_4323	8aa1aaefd30e370458343f447b9298d5_4301	S_aureus_12_01981
WP_000158021.1		DUF456 domain-containing protein	4	4	1	1	1167				467	467	467	34e9a6678acca924fbf24c6bf5608d56_1319	455a00a194b6732c15d9cd1ede6a821e_1356	8aa1aaefd30e370458343f447b9298d5_1453	S_aureus_12_01411
prmA		50S ribosomal protein L11 methyltransferase	4	4	1	1	1412				938	938	938	34e9a6678acca924fbf24c6bf5608d56_3220	455a00a194b6732c15d9cd1ede6a821e_3291	8aa1aaefd30e370458343f447b9298d5_3194	S_aureus_12_01110
WP_000364542.1		adenine phosphoribosyltransferase	4	4	1	1	244				518	518	518	34e9a6678acca924fbf24c6bf5608d56_3333	455a00a194b6732c15d9cd1ede6a821e_3404	8aa1aaefd30e370458343f447b9298d5_3305	S_aureus_12_01165
WP_000036329.1		DUF1648 domain-containing protein	4	4	1	1	1281				473	473	473	34e9a6678acca924fbf24c6bf5608d56_147	455a00a194b6732c15d9cd1ede6a821e_118	8aa1aaefd30e370458343f447b9298d5_284	S_aureus_12_00275
WP_000072632.1		restriction endonuclease subunit S	4	4	1	1	1198				1232	1232	1232	34e9a6678acca924fbf24c6bf5608d56_757	455a00a194b6732c15d9cd1ede6a821e_799	8aa1aaefd30e370458343f447b9298d5_884	S_aureus_12_02271
WP_000387814.1		GHKL domain-containing protein	4	4	1	1	2783				1235	1292	1277	34e9a6678acca924fbf24c6bf5608d56_4160	455a00a194b6732c15d9cd1ede6a821e_4204	8aa1aaefd30e370458343f447b9298d5_4182	S_aureus_12_02333
mnhD2		Na+/H+ antiporter Mnh2 subunit D	4	4	1	1	1339				1496	1496	1496	34e9a6678acca924fbf24c6bf5608d56_1217	455a00a194b6732c15d9cd1ede6a821e_1254	8aa1aaefd30e370458343f447b9298d5_1351	S_aureus_12_01460
WP_000163414.1		nucleoside hydrolase	4	4	1	1	846				941	941	941	34e9a6678acca924fbf24c6bf5608d56_4704	455a00a194b6732c15d9cd1ede6a821e_4750	8aa1aaefd30e370458343f447b9298d5_4719	S_aureus_12_00689
WP_000784258.1		superantigen-like protein SSL5	4	4	1	1	1204				704	704	704	34e9a6678acca924fbf24c6bf5608d56_745	455a00a194b6732c15d9cd1ede6a821e_787	8aa1aaefd30e370458343f447b9298d5_872	S_aureus_12_02276
WP_000738244.1		HlyD family efflux transporter periplasmic adaptor subunit	4	4	1	1	776				647	647	647	34e9a6678acca924fbf24c6bf5608d56_4845	455a00a194b6732c15d9cd1ede6a821e_4891	8aa1aaefd30e370458343f447b9298d5_4862	S_aureus_12_00757
WP_000171418.1		Asp23/Gls24 family envelope stress response protein	4	4	1	1	1699				374	374	374	34e9a6678acca924fbf24c6bf5608d56_2330	455a00a194b6732c15d9cd1ede6a821e_2380	8aa1aaefd30e370458343f447b9298d5_2461	S_aureus_12_01793
group_1775	budA	acetolactate decarboxylase	4	4	1	1	531				704	704	704	34e9a6678acca924fbf24c6bf5608d56_5351	455a00a194b6732c15d9cd1ede6a821e_5391	8aa1aaefd30e370458343f447b9298d5_5372	S_aureus_12_00408
WP_000597238.1		SAV1866 family putative multidrug efflux ABC transporter	4	4	1	1	1041				1736	1736	1736	34e9a6678acca924fbf24c6bf5608d56_3926	455a00a194b6732c15d9cd1ede6a821e_4012	8aa1aaefd30e370458343f447b9298d5_3892	S_aureus_12_02218
nth		endonuclease III	4	4	1	1	1655				659	659	659	34e9a6678acca924fbf24c6bf5608d56_2826	455a00a194b6732c15d9cd1ede6a821e_2911	8aa1aaefd30e370458343f447b9298d5_2930	S_aureus_12_00915
WP_000762708.1		putative metal homeostasis protein	4	4	1	1	709				104	104	104	34e9a6678acca924fbf24c6bf5608d56_4983	455a00a194b6732c15d9cd1ede6a821e_5031	8aa1aaefd30e370458343f447b9298d5_5002	S_aureus_12_00823
secE		preprotein translocase subunit SecE	4	4	1	1	2745				182	182	182	34e9a6678acca924fbf24c6bf5608d56_1032	455a00a194b6732c15d9cd1ede6a821e_1073	8aa1aaefd30e370458343f447b9298d5_1168	S_aureus_12_01550
WP_000266901.1		YeeE/YedE family protein	4	4	1	1	2790				1028	1079	1066	34e9a6678acca924fbf24c6bf5608d56_4174	455a00a194b6732c15d9cd1ede6a821e_4218	8aa1aaefd30e370458343f447b9298d5_4196	S_aureus_12_02340
WP_000159866.1		exodeoxyribonuclease VII small subunit	4	4	1	1	1468				230	230	230	34e9a6678acca924fbf24c6bf5608d56_3107	455a00a194b6732c15d9cd1ede6a821e_3178	8aa1aaefd30e370458343f447b9298d5_3081	S_aureus_12_01056
rplK		50S ribosomal protein L11	4	4	1	1	2743				422	422	422	34e9a6678acca924fbf24c6bf5608d56_1036	455a00a194b6732c15d9cd1ede6a821e_1077	8aa1aaefd30e370458343f447b9298d5_1172	S_aureus_12_01548
tilS		tRNA lysidine(34) synthetase TilS	4	4	1	1	2696				1295	1295	1295	34e9a6678acca924fbf24c6bf5608d56_928	455a00a194b6732c15d9cd1ede6a821e_974	8aa1aaefd30e370458343f447b9298d5_1059	S_aureus_12_02521
WP_000354114.1		YggT family protein	4	4	1	1	1381				290	290	290	34e9a6678acca924fbf24c6bf5608d56_2260	455a00a194b6732c15d9cd1ede6a821e_2310	8aa1aaefd30e370458343f447b9298d5_2391	S_aureus_12_02553
nrdG		anaerobic ribonucleoside-triphosphate reductase activating protein	4	4	1	1	515				536	536	536	34e9a6678acca924fbf24c6bf5608d56_5387	455a00a194b6732c15d9cd1ede6a821e_5427	8aa1aaefd30e370458343f447b9298d5_5408	S_aureus_12_00422
WP_000159755.1		PTS transporter subunit EIIC	4	4	1	1	1869				1454	1454	1454	34e9a6678acca924fbf24c6bf5608d56_315	455a00a194b6732c15d9cd1ede6a821e_286	8aa1aaefd30e370458343f447b9298d5_450	S_aureus_12_00192
WP_000083795.1		PTS mannitol transporter subunit IICB	4	4	1	1	2902				1538	1538	1538	34e9a6678acca924fbf24c6bf5608d56_4419	455a00a194b6732c15d9cd1ede6a821e_4462	8aa1aaefd30e370458343f447b9298d5_4438	S_aureus_12_02046
WP_000032840.1		SarA family transcriptional regulator	4	4	1	1	833				743	743	743	34e9a6678acca924fbf24c6bf5608d56_4730	455a00a194b6732c15d9cd1ede6a821e_4776	8aa1aaefd30e370458343f447b9298d5_4747	S_aureus_12_00702
gcvT		glycine cleavage system aminomethyltransferase GcvT	4	4	1	1	1454				1091	1091	1091	34e9a6678acca924fbf24c6bf5608d56_3135	455a00a194b6732c15d9cd1ede6a821e_3206	8aa1aaefd30e370458343f447b9298d5_3109	S_aureus_12_01070
ygs		S1 domain-containing post-transcriptional regulator Ygs	4	4	1	1	2230				377	377	377	34e9a6678acca924fbf24c6bf5608d56_1756	455a00a194b6732c15d9cd1ede6a821e_1809	8aa1aaefd30e370458343f447b9298d5_1884	S_aureus_12_01202
rsbW		anti-sigma B factor RsbW	4	4	1	1	2813				479	509	486	34e9a6678acca924fbf24c6bf5608d56_4238	455a00a194b6732c15d9cd1ede6a821e_4279	8aa1aaefd30e370458343f447b9298d5_4257	S_aureus_12_01961
WP_000262597.1		methylated-DNA--[protein]-cysteine S-methyltransferase	4	4	1	1	582				521	521	521	34e9a6678acca924fbf24c6bf5608d56_5245	455a00a194b6732c15d9cd1ede6a821e_5287	8aa1aaefd30e370458343f447b9298d5_5268	S_aureus_12_00359
WP_000079317.1		succinate dehydrogenase cytochrome b558 subunit	4	4	1	1	2456				614	614	614	34e9a6678acca924fbf24c6bf5608d56_2169	455a00a194b6732c15d9cd1ede6a821e_2219	8aa1aaefd30e370458343f447b9298d5_2300	S_aureus_12_02478
WP_000333457.1		DUF3885 domain-containing protein	4	4	1	1	2944				608	608	608	34e9a6678acca924fbf24c6bf5608d56_4534	455a00a194b6732c15d9cd1ede6a821e_4577	8aa1aaefd30e370458343f447b9298d5_4551	S_aureus_12_00612
WP_000435044.1		DedA family protein	4	4	1	1	619				611	611	611	34e9a6678acca924fbf24c6bf5608d56_5169	455a00a194b6732c15d9cd1ede6a821e_5211	8aa1aaefd30e370458343f447b9298d5_5192	S_aureus_12_00323
WP_001086108.1		LLM class flavin-dependent oxidoreductase	4	4	1	1	337				1061	1061	1061	34e9a6678acca924fbf24c6bf5608d56_615	455a00a194b6732c15d9cd1ede6a821e_611	8aa1aaefd30e370458343f447b9298d5_742	S_aureus_12_00052
rpmA		50S ribosomal protein L27	4	4	1	1	254				284	284	284	34e9a6678acca924fbf24c6bf5608d56_3353	455a00a194b6732c15d9cd1ede6a821e_3424	8aa1aaefd30e370458343f447b9298d5_3325	S_aureus_12_01175
WP_000634110.1		cysteine synthase family protein	4	4	1	1	2645				905	905	905	34e9a6678acca924fbf24c6bf5608d56_809	455a00a194b6732c15d9cd1ede6a821e_855	8aa1aaefd30e370458343f447b9298d5_940	S_aureus_12_02246
WP_000812850.1		aminotransferase class V-fold PLP-dependent enzyme	4	4	1	1	2667				1337	1337	1337	34e9a6678acca924fbf24c6bf5608d56_870	455a00a194b6732c15d9cd1ede6a821e_916	8aa1aaefd30e370458343f447b9298d5_1001	S_aureus_12_02549
rlmH		23S rRNA (pseudouridine(1915)-N(3))-methyltransferase RlmH	4	4	1	1	2172				479	479	479	34e9a6678acca924fbf24c6bf5608d56_57	455a00a194b6732c15d9cd1ede6a821e_57	8aa1aaefd30e370458343f447b9298d5_57	S_aureus_12_00549
gatA		Asp-tRNA(Asn)/Glu-tRNA(Gln) amidotransferase subunit GatA	4	4	1	1	1078				1457	1457	1457	34e9a6678acca924fbf24c6bf5608d56_4000	455a00a194b6732c15d9cd1ede6a821e_4086	8aa1aaefd30e370458343f447b9298d5_3966	S_aureus_12_02184
clfA		MSCRAMM family adhesin clumping factor ClfA	4	4	1	1	2365				2711	3089	2873	34e9a6678acca924fbf24c6bf5608d56_1559	455a00a194b6732c15d9cd1ede6a821e_1662	8aa1aaefd30e370458343f447b9298d5_1735	S_aureus_12_01273
WP_000846746.1		hypothetical protein	4	4	1	1	2846				440	503	455	34e9a6678acca924fbf24c6bf5608d56_4307	455a00a194b6732c15d9cd1ede6a821e_4348	8aa1aaefd30e370458343f447b9298d5_4326	S_aureus_12_01993
mvk		mevalonate kinase	4	4	1	1	1325				920	920	920	34e9a6678acca924fbf24c6bf5608d56_1141	455a00a194b6732c15d9cd1ede6a821e_1180	8aa1aaefd30e370458343f447b9298d5_1277	S_aureus_12_01496
adhP		alcohol dehydrogenase AdhP	4	4	1	1	1358				1010	1010	1010	34e9a6678acca924fbf24c6bf5608d56_1177	455a00a194b6732c15d9cd1ede6a821e_1214	8aa1aaefd30e370458343f447b9298d5_1311	S_aureus_12_01479
pyrH		UMP kinase	4	4	1	1	1733				722	722	722	34e9a6678acca924fbf24c6bf5608d56_2400	455a00a194b6732c15d9cd1ede6a821e_2450	8aa1aaefd30e370458343f447b9298d5_2531	S_aureus_12_01760
WP_001129473.1		hypothetical protein	4	4	1	1	2651				269	269	269	34e9a6678acca924fbf24c6bf5608d56_821	455a00a194b6732c15d9cd1ede6a821e_867	8aa1aaefd30e370458343f447b9298d5_952	S_aureus_12_02240
WP_001265703.1		type 1 glutamine amidotransferase	4	4	1	1	1935				671	671	671	34e9a6678acca924fbf24c6bf5608d56_389	455a00a194b6732c15d9cd1ede6a821e_358	8aa1aaefd30e370458343f447b9298d5_522	S_aureus_12_00158
WP_000076025.1		branched-chain amino acid aminotransferase	4	4	1	1	2726				1076	1076	1076	34e9a6678acca924fbf24c6bf5608d56_1071	455a00a194b6732c15d9cd1ede6a821e_1112	8aa1aaefd30e370458343f447b9298d5_1207	S_aureus_12_01531
cap8D		type 8 capsular polysaccharide synthesis protein Cap8D	4	4	1	1	1829				1823	1823	1823	34e9a6678acca924fbf24c6bf5608d56_235	455a00a194b6732c15d9cd1ede6a821e_206	8aa1aaefd30e370458343f447b9298d5_370	S_aureus_12_00232
WP_000071899.1		pyridoxamine 5'-phosphate oxidase family protein	4	4	1	1	743				422	422	422	34e9a6678acca924fbf24c6bf5608d56_4913	455a00a194b6732c15d9cd1ede6a821e_4959	8aa1aaefd30e370458343f447b9298d5_4932	S_aureus_12_00789
trpS		tryptophan--tRNA ligase	4	4	1	1	402				989	989	989	34e9a6678acca924fbf24c6bf5608d56_1847	455a00a194b6732c15d9cd1ede6a821e_1898	8aa1aaefd30e370458343f447b9298d5_1975	S_aureus_12_01703
WP_001004401.1		hypothetical protein	4	4	1	1	2372				284	284	284	34e9a6678acca924fbf24c6bf5608d56_1573	455a00a194b6732c15d9cd1ede6a821e_1676	8aa1aaefd30e370458343f447b9298d5_1749	S_aureus_12_01266
WP_001801518.1		hypothetical protein	4	4	1	1	2858				353	452	427	34e9a6678acca924fbf24c6bf5608d56_4331	455a00a194b6732c15d9cd1ede6a821e_4372	8aa1aaefd30e370458343f447b9298d5_4352	S_aureus_12_02005
msrB		peptide-methionine (R)-S-oxide reductase MsrB	4	4	1	1	1682				428	428	428	34e9a6678acca924fbf24c6bf5608d56_2769	455a00a194b6732c15d9cd1ede6a821e_2854	8aa1aaefd30e370458343f447b9298d5_2873	S_aureus_12_00888
WP_000106185.1		MarR family winged helix-turn-helix transcriptional regulator	4	4	1	1	498				455	455	455	34e9a6678acca924fbf24c6bf5608d56_5421	455a00a194b6732c15d9cd1ede6a821e_5461	8aa1aaefd30e370458343f447b9298d5_5442	S_aureus_12_00436
WP_001147955.1		thioredoxin family protein	4	4	1	1	2384				320	320	320	34e9a6678acca924fbf24c6bf5608d56_1597	455a00a194b6732c15d9cd1ede6a821e_1700	8aa1aaefd30e370458343f447b9298d5_1773	S_aureus_12_01254
WP_000161314.1		ROK family glucokinase	4	4	1	1	1443				986	986	986	34e9a6678acca924fbf24c6bf5608d56_3158	455a00a194b6732c15d9cd1ede6a821e_3229	8aa1aaefd30e370458343f447b9298d5_3132	S_aureus_12_01080
WP_000608187.1		hypothetical protein	4	4	1	1	2363				521	521	521	34e9a6678acca924fbf24c6bf5608d56_1555	455a00a194b6732c15d9cd1ede6a821e_1658	8aa1aaefd30e370458343f447b9298d5_1731	S_aureus_12_01275
WP_000671059.1		RNA polymerase sigma factor	4	4	1	1	175				470	470	470	34e9a6678acca924fbf24c6bf5608d56_3620	455a00a194b6732c15d9cd1ede6a821e_3700	8aa1aaefd30e370458343f447b9298d5_3589	S_aureus_12_01861
polX		DNA polymerase/3'-5' exonuclease PolX	4	4	1	1	2451				1712	1712	1712	34e9a6678acca924fbf24c6bf5608d56_2159	455a00a194b6732c15d9cd1ede6a821e_2209	8aa1aaefd30e370458343f447b9298d5_2290	S_aureus_12_02482
WP_001165376.1		HesB/YadR/YfhF family protein	4	4	1	1	2517				296	296	296	34e9a6678acca924fbf24c6bf5608d56_2622	455a00a194b6732c15d9cd1ede6a821e_2708	8aa1aaefd30e370458343f447b9298d5_2727	S_aureus_12_02454
WP_000902813.1		YisL family protein	4	4	1	1	2049				389	389	389	34e9a6678acca924fbf24c6bf5608d56_1784	455a00a194b6732c15d9cd1ede6a821e_1837	8aa1aaefd30e370458343f447b9298d5_1912	S_aureus_12_01188
WP_000670311.1		sensor histidine kinase	4	4	1	1	2484				1091	1091	1091	34e9a6678acca924fbf24c6bf5608d56_2556	455a00a194b6732c15d9cd1ede6a821e_2642	8aa1aaefd30e370458343f447b9298d5_2661	S_aureus_12_02424
WP_000379892.1		threonylcarbamoyl-AMP synthase	4	4	1	1	2864				1046	1097	1058	34e9a6678acca924fbf24c6bf5608d56_4343	455a00a194b6732c15d9cd1ede6a821e_4384	8aa1aaefd30e370458343f447b9298d5_4364	S_aureus_12_02011
pdxT		pyridoxal 5'-phosphate synthase glutaminase subunit PdxT	4	4	1	1	2761				560	560	560	34e9a6678acca924fbf24c6bf5608d56_1000	455a00a194b6732c15d9cd1ede6a821e_1041	8aa1aaefd30e370458343f447b9298d5_1134	S_aureus_12_01565
panB		3-methyl-2-oxobutanoate hydroxymethyltransferase	4	4	1	1	533				818	818	818	34e9a6678acca924fbf24c6bf5608d56_5347	455a00a194b6732c15d9cd1ede6a821e_5387	8aa1aaefd30e370458343f447b9298d5_5368	S_aureus_12_00406
mnhE2		Na+/H+ antiporter Mnh2 subunit E	4	4	1	1	1338				482	482	482	34e9a6678acca924fbf24c6bf5608d56_1219	455a00a194b6732c15d9cd1ede6a821e_1256	8aa1aaefd30e370458343f447b9298d5_1353	S_aureus_12_01459
floA		flotillin-like protein FloA	4	4	1	1	1417				989	989	989	34e9a6678acca924fbf24c6bf5608d56_3210	455a00a194b6732c15d9cd1ede6a821e_3281	8aa1aaefd30e370458343f447b9298d5_3184	S_aureus_12_01105
sdaAB		L-serine ammonia-lyase, iron-sulfur-dependent subunit beta	4	4	1	1	598				680	680	680	34e9a6678acca924fbf24c6bf5608d56_5213	455a00a194b6732c15d9cd1ede6a821e_5255	8aa1aaefd30e370458343f447b9298d5_5236	S_aureus_12_00343
WP_001223008.1		MBL fold metallo-hydrolase	4	4	1	1	1445				623	623	623	34e9a6678acca924fbf24c6bf5608d56_3154	455a00a194b6732c15d9cd1ede6a821e_3225	8aa1aaefd30e370458343f447b9298d5_3128	S_aureus_12_01078
manA		mannose-6-phosphate isomerase, class I	4	4	1	1	482				938	938	938	34e9a6678acca924fbf24c6bf5608d56_5451	455a00a194b6732c15d9cd1ede6a821e_5491	8aa1aaefd30e370458343f447b9298d5_5472	S_aureus_12_00450
WP_000580201.1		hypothetical protein	4	4	1	1	2495				314	314	314	34e9a6678acca924fbf24c6bf5608d56_2578	455a00a194b6732c15d9cd1ede6a821e_2664	8aa1aaefd30e370458343f447b9298d5_2683	S_aureus_12_02435
coaW		type II pantothenate kinase	4	4	1	1	2878				803	803	803	34e9a6678acca924fbf24c6bf5608d56_4371	455a00a194b6732c15d9cd1ede6a821e_4412	8aa1aaefd30e370458343f447b9298d5_4392	S_aureus_12_02025
pbp4		penicillin-binding protein PBP4	4	4	1	1	1134				1295	1295	1295	34e9a6678acca924fbf24c6bf5608d56_1253	455a00a194b6732c15d9cd1ede6a821e_1290	8aa1aaefd30e370458343f447b9298d5_1387	S_aureus_12_01442
WP_001792545.1		DeoR/GlpR family DNA-binding transcription regulator	4	4	1	1	2942				755	791	782	34e9a6678acca924fbf24c6bf5608d56_4528	455a00a194b6732c15d9cd1ede6a821e_4571	8aa1aaefd30e370458343f447b9298d5_4547	S_aureus_12_00610
WP_001251935.1		hypothetical protein	4	4	1	1	2918				260	260	260	34e9a6678acca924fbf24c6bf5608d56_4480	455a00a194b6732c15d9cd1ede6a821e_4523	8aa1aaefd30e370458343f447b9298d5_4499	S_aureus_12_00587
WP_000966697.1		YnfA family protein	4	4	1	1	790				326	326	326	34e9a6678acca924fbf24c6bf5608d56_4817	455a00a194b6732c15d9cd1ede6a821e_4863	8aa1aaefd30e370458343f447b9298d5_4834	S_aureus_12_00744
rnmV		ribonuclease M5	4	4	1	1	2678				536	536	536	34e9a6678acca924fbf24c6bf5608d56_892	455a00a194b6732c15d9cd1ede6a821e_938	8aa1aaefd30e370458343f447b9298d5_1023	S_aureus_12_02538
WP_001260046.1		hypothetical protein	4	4	1	1	466				302	302	302	34e9a6678acca924fbf24c6bf5608d56_5481	455a00a194b6732c15d9cd1ede6a821e_5524	8aa1aaefd30e370458343f447b9298d5_5504	S_aureus_12_00466
WP_000846637.1		L-lactate dehydrogenase	4	4	1	1	530				959	959	959	34e9a6678acca924fbf24c6bf5608d56_5353	455a00a194b6732c15d9cd1ede6a821e_5393	8aa1aaefd30e370458343f447b9298d5_5374	S_aureus_12_00409
WP_000933774.1		ribose-phosphate diphosphokinase	4	4	1	1	2687				965	965	965	34e9a6678acca924fbf24c6bf5608d56_910	455a00a194b6732c15d9cd1ede6a821e_956	8aa1aaefd30e370458343f447b9298d5_1041	S_aureus_12_02530
WP_000132893.1		alpha/beta hydrolase	4	4	1	1	2987				554	554	554	34e9a6678acca924fbf24c6bf5608d56_3763	455a00a194b6732c15d9cd1ede6a821e_3852	8aa1aaefd30e370458343f447b9298d5_3732	S_aureus_12_01926
WP_001068337.1		YuzB family protein	4	4	1	1	2246				236	236	236	34e9a6678acca924fbf24c6bf5608d56_1724	455a00a194b6732c15d9cd1ede6a821e_1777	8aa1aaefd30e370458343f447b9298d5_1852	S_aureus_12_01218
cdd		cytidine deaminase	4	4	1	1	1422				404	404	404	34e9a6678acca924fbf24c6bf5608d56_3200	455a00a194b6732c15d9cd1ede6a821e_3271	8aa1aaefd30e370458343f447b9298d5_3174	S_aureus_12_01100
WP_000566649.1		DUF3055 domain-containing protein	4	4	1	1	2259				266	266	266	34e9a6678acca924fbf24c6bf5608d56_1698	455a00a194b6732c15d9cd1ede6a821e_1751	8aa1aaefd30e370458343f447b9298d5_1826	S_aureus_12_01230
QOB72587.1		hypothetical protein	4	4	1	1	2945				248	293	270	34e9a6678acca924fbf24c6bf5608d56_4536	455a00a194b6732c15d9cd1ede6a821e_4579	8aa1aaefd30e370458343f447b9298d5_4553	S_aureus_12_00613
WP_000819532.1		diacylglycerol kinase	4	4	1	1	1421				344	344	344	34e9a6678acca924fbf24c6bf5608d56_3202	455a00a194b6732c15d9cd1ede6a821e_3273	8aa1aaefd30e370458343f447b9298d5_3176	S_aureus_12_01101
WP_001224379.1		hypothetical protein	4	4	1	1	640				191	191	191	34e9a6678acca924fbf24c6bf5608d56_5125	455a00a194b6732c15d9cd1ede6a821e_5169	8aa1aaefd30e370458343f447b9298d5_5146	S_aureus_12_00303
femX		lipid II:glycine glycyltransferase	4	4	1	1	868				1265	1265	1265	34e9a6678acca924fbf24c6bf5608d56_4660	455a00a194b6732c15d9cd1ede6a821e_4706	8aa1aaefd30e370458343f447b9298d5_4675	S_aureus_12_00668
hisG		ATP phosphoribosyltransferase	4	4	1	1	445				614	614	614	34e9a6678acca924fbf24c6bf5608d56_5521	455a00a194b6732c15d9cd1ede6a821e_5564	8aa1aaefd30e370458343f447b9298d5_5546	S_aureus_12_00487
sbi		immunoglobulin-binding protein Sbi	4	4	1	1	705				1313	1313	1313	34e9a6678acca924fbf24c6bf5608d56_4991	455a00a194b6732c15d9cd1ede6a821e_5039	8aa1aaefd30e370458343f447b9298d5_5010	S_aureus_12_00826
WP_000148821.1		YaiI/YqxD family protein	4	4	1	1	2086				458	458	458	34e9a6678acca924fbf24c6bf5608d56_1335	455a00a194b6732c15d9cd1ede6a821e_1438	8aa1aaefd30e370458343f447b9298d5_1469	S_aureus_12_01404
WP_001133021.1		5'-3' exonuclease	4	4	1	1	1666				878	878	878	34e9a6678acca924fbf24c6bf5608d56_2801	455a00a194b6732c15d9cd1ede6a821e_2886	8aa1aaefd30e370458343f447b9298d5_2905	S_aureus_12_00903
WP_000284434.1		nicotinate phosphoribosyltransferase	4	4	1	1	1092				1469	1469	1469	34e9a6678acca924fbf24c6bf5608d56_4028	455a00a194b6732c15d9cd1ede6a821e_4114	8aa1aaefd30e370458343f447b9298d5_3994	S_aureus_12_02170
WP_000785248.1		hypothetical protein	4	4	1	1	2344				458	458	458	34e9a6678acca924fbf24c6bf5608d56_1536	455a00a194b6732c15d9cd1ede6a821e_1639	8aa1aaefd30e370458343f447b9298d5_1668	S_aureus_12_01305
WP_000934885.1		thymidylate synthase	4	4	1	1	1678				956	956	956	34e9a6678acca924fbf24c6bf5608d56_2777	455a00a194b6732c15d9cd1ede6a821e_2862	8aa1aaefd30e370458343f447b9298d5_2881	S_aureus_12_00892
WP_001015495.1		aldo/keto reductase	4	4	1	1	2947				542	848	771	34e9a6678acca924fbf24c6bf5608d56_4540	455a00a194b6732c15d9cd1ede6a821e_4583	8aa1aaefd30e370458343f447b9298d5_4557	S_aureus_12_00615
WP_000197556.1		ABC transporter permease	4	4	1	1	1850				761	761	761	34e9a6678acca924fbf24c6bf5608d56_277	455a00a194b6732c15d9cd1ede6a821e_248	8aa1aaefd30e370458343f447b9298d5_412	S_aureus_12_00211
WP_000186306.1		Cof-type HAD-IIB family hydrolase	4	4	1	1	2494				803	803	803	34e9a6678acca924fbf24c6bf5608d56_2576	455a00a194b6732c15d9cd1ede6a821e_2662	8aa1aaefd30e370458343f447b9298d5_2681	S_aureus_12_02434
WP_000172546.1		hypothetical protein	4	4	1	1	2630				314	314	314	34e9a6678acca924fbf24c6bf5608d56_779	455a00a194b6732c15d9cd1ede6a821e_825	8aa1aaefd30e370458343f447b9298d5_910	S_aureus_12_02256
group_1853	pepF	oligoendopeptidase F	4	4	1	1	398				1808	1808	1808	34e9a6678acca924fbf24c6bf5608d56_1855	455a00a194b6732c15d9cd1ede6a821e_1906	8aa1aaefd30e370458343f447b9298d5_1983	S_aureus_12_01699
WP_000205106.1		YolD-like family protein	4	4	1	1	1103				401	401	401	34e9a6678acca924fbf24c6bf5608d56_4050	455a00a194b6732c15d9cd1ede6a821e_4136	8aa1aaefd30e370458343f447b9298d5_4016	S_aureus_12_02161
ribE		riboflavin synthase	4	4	1	1	168				632	632	632	34e9a6678acca924fbf24c6bf5608d56_3605	455a00a194b6732c15d9cd1ede6a821e_3685	8aa1aaefd30e370458343f447b9298d5_3574	S_aureus_12_01854
WP_001037807.1		DoxX family protein	4	4	1	1	2060				473	473	473	34e9a6678acca924fbf24c6bf5608d56_1387	455a00a194b6732c15d9cd1ede6a821e_1490	8aa1aaefd30e370458343f447b9298d5_1521	S_aureus_12_01378
WP_000614712.1		hypothetical protein	4	4	1	1	2199				482	482	482	34e9a6678acca924fbf24c6bf5608d56_2095	455a00a194b6732c15d9cd1ede6a821e_2145	8aa1aaefd30e370458343f447b9298d5_2226	S_aureus_12_01587
WP_000215220.1		DUF488 domain-containing protein	4	4	1	1	1932				356	356	356	34e9a6678acca924fbf24c6bf5608d56_395	455a00a194b6732c15d9cd1ede6a821e_364	8aa1aaefd30e370458343f447b9298d5_528	S_aureus_12_00155
WP_000477959.1		DUF3267 domain-containing protein	4	4	1	1	2998				557	557	557	34e9a6678acca924fbf24c6bf5608d56_3783	455a00a194b6732c15d9cd1ede6a821e_3872	8aa1aaefd30e370458343f447b9298d5_3752	S_aureus_12_01936
rplV		50S ribosomal protein L22	4	4	1	1	886				344	353	350	34e9a6678acca924fbf24c6bf5608d56_4624	455a00a194b6732c15d9cd1ede6a821e_4670	8aa1aaefd30e370458343f447b9298d5_4639	S_aureus_12_00652
WP_000808968.1		type B 50S ribosomal protein L31	4	4	1	1	2868				254	254	254	34e9a6678acca924fbf24c6bf5608d56_4351	455a00a194b6732c15d9cd1ede6a821e_4392	8aa1aaefd30e370458343f447b9298d5_4372	S_aureus_12_02015
WP_000277602.1		universal stress protein	4	4	1	1	37				413	413	413	34e9a6678acca924fbf24c6bf5608d56_3471	455a00a194b6732c15d9cd1ede6a821e_3537	8aa1aaefd30e370458343f447b9298d5_3438	S_aureus_12_02094
whiA		DNA-binding protein WhiA	4	4	1	1	2333				944	944	944	34e9a6678acca924fbf24c6bf5608d56_1514	455a00a194b6732c15d9cd1ede6a821e_1617	8aa1aaefd30e370458343f447b9298d5_1646	S_aureus_12_01317
WP_000138663.1		ABC transporter ATP-binding protein	4	4	1	1	440				1712	1712	1712	34e9a6678acca924fbf24c6bf5608d56_5531	455a00a194b6732c15d9cd1ede6a821e_5574	8aa1aaefd30e370458343f447b9298d5_5556	S_aureus_12_00492
hpt		hypoxanthine phosphoribosyltransferase	4	4	1	1	2697				539	539	539	34e9a6678acca924fbf24c6bf5608d56_930	455a00a194b6732c15d9cd1ede6a821e_976	8aa1aaefd30e370458343f447b9298d5_1061	S_aureus_12_02520
pdhA		pyruvate dehydrogenase (acetyl-transferring) E1 component subunit alpha	4	4	1	1	2609				1112	1112	1112	34e9a6678acca924fbf24c6bf5608d56_2059	455a00a194b6732c15d9cd1ede6a821e_2109	8aa1aaefd30e370458343f447b9298d5_2190	S_aureus_12_01604
WP_000275719.1		pectate lyase	4	4	1	1	1097				1097	1097	1097	34e9a6678acca924fbf24c6bf5608d56_4038	455a00a194b6732c15d9cd1ede6a821e_4124	8aa1aaefd30e370458343f447b9298d5_4004	S_aureus_12_02166
bshA		N-acetyl-alpha-D-glucosaminyl L-malate synthase BshA	4	4	1	1	1649				1142	1142	1142	34e9a6678acca924fbf24c6bf5608d56_2838	455a00a194b6732c15d9cd1ede6a821e_2923	8aa1aaefd30e370458343f447b9298d5_2942	S_aureus_12_00921
xpt		xanthine phosphoribosyltransferase	4	4	1	1	1227				578	578	578	34e9a6678acca924fbf24c6bf5608d56_713	455a00a194b6732c15d9cd1ede6a821e_755	8aa1aaefd30e370458343f447b9298d5_842	S_aureus_12_00005
ptsG		glucose-specific PTS transporter subunit IIBC	4	4	1	1	1866				2045	2045	2045	34e9a6678acca924fbf24c6bf5608d56_309	455a00a194b6732c15d9cd1ede6a821e_280	8aa1aaefd30e370458343f447b9298d5_444	S_aureus_12_00195
ydbM		acyl-CoA/acyl-ACP dehydrogenase	4	4	1	1	844				1115	1172	1148	34e9a6678acca924fbf24c6bf5608d56_4708	455a00a194b6732c15d9cd1ede6a821e_4754	8aa1aaefd30e370458343f447b9298d5_4723	S_aureus_12_00691
WP_001167834.1		N-acetyltransferase	4	4	1	1	2663				524	524	524	34e9a6678acca924fbf24c6bf5608d56_851	455a00a194b6732c15d9cd1ede6a821e_897	8aa1aaefd30e370458343f447b9298d5_982	S_aureus_12_02228
WP_000157650.1		50S ribosomal protein L25/general stress protein Ctc	4	4	1	1	2688				653	653	653	34e9a6678acca924fbf24c6bf5608d56_912	455a00a194b6732c15d9cd1ede6a821e_958	8aa1aaefd30e370458343f447b9298d5_1043	S_aureus_12_02529
WP_001021628.1		DUF1304 domain-containing protein	4	4	1	1	1210				359	359	359	34e9a6678acca924fbf24c6bf5608d56_733	455a00a194b6732c15d9cd1ede6a821e_775	8aa1aaefd30e370458343f447b9298d5_860	S_aureus_12_02282
fmhA		FemA/FemB family glycyltransferase FmhA	4	4	1	1	714				1250	1250	1250	34e9a6678acca924fbf24c6bf5608d56_4973	455a00a194b6732c15d9cd1ede6a821e_5021	8aa1aaefd30e370458343f447b9298d5_4992	S_aureus_12_00818
rpoD		RNA polymerase sigma factor RpoD	4	4	1	1	1429				1106	1106	1106	34e9a6678acca924fbf24c6bf5608d56_3186	455a00a194b6732c15d9cd1ede6a821e_3257	8aa1aaefd30e370458343f447b9298d5_3160	S_aureus_12_01093
WP_000401380.1		SAM-dependent methyltransferase	4	4	1	1	2692				1193	1193	1193	34e9a6678acca924fbf24c6bf5608d56_920	455a00a194b6732c15d9cd1ede6a821e_966	8aa1aaefd30e370458343f447b9298d5_1051	S_aureus_12_02525
cobA		uroporphyrinogen-III C-methyltransferase	4	4	1	1	727				977	977	977	34e9a6678acca924fbf24c6bf5608d56_4945	455a00a194b6732c15d9cd1ede6a821e_4993	8aa1aaefd30e370458343f447b9298d5_4964	S_aureus_12_00805
WP_001106715.1		glycosyltransferase	4	4	1	1	2717				1472	1472	1472	34e9a6678acca924fbf24c6bf5608d56_1091	455a00a194b6732c15d9cd1ede6a821e_1130	8aa1aaefd30e370458343f447b9298d5_1227	S_aureus_12_01521
WP_000848773.1		ABC transporter permease	4	4	1	1	2186				1166	1166	1166	34e9a6678acca924fbf24c6bf5608d56_485	455a00a194b6732c15d9cd1ede6a821e_454	8aa1aaefd30e370458343f447b9298d5_618	S_aureus_12_00114
WP_000173876.1		ABC transporter ATP-binding protein	4	4	1	1	658				815	815	815	34e9a6678acca924fbf24c6bf5608d56_5087	455a00a194b6732c15d9cd1ede6a821e_5131	8aa1aaefd30e370458343f447b9298d5_5106	S_aureus_12_00870
WP_000739232.1		N-acetylglucosaminidase	4	4	1	1	823				638	776	741	34e9a6678acca924fbf24c6bf5608d56_4750	455a00a194b6732c15d9cd1ede6a821e_4796	8aa1aaefd30e370458343f447b9298d5_4767	S_aureus_12_00711
murD		UDP-N-acetylmuramoyl-L-alanine--D-glutamate ligase	4	4	1	1	1374				1349	1349	1349	34e9a6678acca924fbf24c6bf5608d56_2246	455a00a194b6732c15d9cd1ede6a821e_2296	8aa1aaefd30e370458343f447b9298d5_2377	S_aureus_12_02560
WP_001011603.1		glutamate-1-semialdehyde 2,1-aminomutase	4	4	1	1	3012				1289	1289	1289	34e9a6678acca924fbf24c6bf5608d56_3922	455a00a194b6732c15d9cd1ede6a821e_4008	8aa1aaefd30e370458343f447b9298d5_3888	S_aureus_12_02220
WP_000595635.1		hypothetical protein	4	4	1	1	2976				515	515	515	34e9a6678acca924fbf24c6bf5608d56_3717	455a00a194b6732c15d9cd1ede6a821e_3806	8aa1aaefd30e370458343f447b9298d5_3686	S_aureus_12_01907
WP_000535849.1		ABC transporter ATP-binding protein	4	4	1	1	1046				1517	1517	1517	34e9a6678acca924fbf24c6bf5608d56_3936	455a00a194b6732c15d9cd1ede6a821e_4022	8aa1aaefd30e370458343f447b9298d5_3902	S_aureus_12_02213
WP_000451438.1		helix-turn-helix transcriptional regulator	4	4	1	1	2871				335	335	335	34e9a6678acca924fbf24c6bf5608d56_4357	455a00a194b6732c15d9cd1ede6a821e_4398	8aa1aaefd30e370458343f447b9298d5_4378	S_aureus_12_02018
WP_000417008.1		2-hydroxyacid dehydrogenase family protein	4	4	1	1	825				953	953	953	34e9a6678acca924fbf24c6bf5608d56_4746	455a00a194b6732c15d9cd1ede6a821e_4792	8aa1aaefd30e370458343f447b9298d5_4763	S_aureus_12_00709
WP_000948285.1		NADH dehydrogenase subunit 5	4	4	1	1	2637				1484	1484	1484	34e9a6678acca924fbf24c6bf5608d56_793	455a00a194b6732c15d9cd1ede6a821e_839	8aa1aaefd30e370458343f447b9298d5_924	S_aureus_12_02252
WP_001574168.1		DUF1672 domain-containing protein	4	4	1	1	1503				932	932	932	34e9a6678acca924fbf24c6bf5608d56_3035	455a00a194b6732c15d9cd1ede6a821e_3106	8aa1aaefd30e370458343f447b9298d5_3011	S_aureus_12_01021
WP_000138218.1		Crp/Fnr family transcriptional regulator	4	4	1	1	494				704	704	704	34e9a6678acca924fbf24c6bf5608d56_5427	455a00a194b6732c15d9cd1ede6a821e_5467	8aa1aaefd30e370458343f447b9298d5_5448	S_aureus_12_00439
WP_001259673.1		GNAT family N-acetyltransferase	4	4	1	1	2091				443	443	443	34e9a6678acca924fbf24c6bf5608d56_1325	455a00a194b6732c15d9cd1ede6a821e_1428	8aa1aaefd30e370458343f447b9298d5_1459	S_aureus_12_01409
WP_000831055.1		LCP family protein	4	4	1	1	819				923	947	941	34e9a6678acca924fbf24c6bf5608d56_4758	455a00a194b6732c15d9cd1ede6a821e_4804	8aa1aaefd30e370458343f447b9298d5_4775	S_aureus_12_00715
WP_000164421.1		S-ribosylhomocysteine lyase	4	4	1	1	2882				470	470	470	34e9a6678acca924fbf24c6bf5608d56_4379	455a00a194b6732c15d9cd1ede6a821e_4420	8aa1aaefd30e370458343f447b9298d5_4400	S_aureus_12_02029
WP_000776744.1		ABC transporter permease	4	4	1	1	505				2000	2000	2000	34e9a6678acca924fbf24c6bf5608d56_5407	455a00a194b6732c15d9cd1ede6a821e_5447	8aa1aaefd30e370458343f447b9298d5_5428	S_aureus_12_00429
sbnB		N-[(2S)-2-amino-2-carboxyethyl]-L-glutamate dehydrogenase SbnB	4	4	1	1	1273				1010	1010	1010	34e9a6678acca924fbf24c6bf5608d56_163	455a00a194b6732c15d9cd1ede6a821e_134	8aa1aaefd30e370458343f447b9298d5_300	S_aureus_12_00267
mnhG1		Na+/H+ antiporter Mnh1 subunit G	4	4	1	1	2239				356	356	356	34e9a6678acca924fbf24c6bf5608d56_1738	455a00a194b6732c15d9cd1ede6a821e_1791	8aa1aaefd30e370458343f447b9298d5_1866	S_aureus_12_01211
WP_000814565.1		hypothetical protein	4	4	1	1	2210				389	389	389	34e9a6678acca924fbf24c6bf5608d56_2117	455a00a194b6732c15d9cd1ede6a821e_2167	8aa1aaefd30e370458343f447b9298d5_2248	S_aureus_12_01576
WP_000216727.1		hypothetical protein	4	4	1	1	2071				452	452	452	34e9a6678acca924fbf24c6bf5608d56_1365	455a00a194b6732c15d9cd1ede6a821e_1468	8aa1aaefd30e370458343f447b9298d5_1499	S_aureus_12_01389
WP_000031265.1		class I SAM-dependent methyltransferase	4	4	1	1	1901				761	761	761	34e9a6678acca924fbf24c6bf5608d56_459	455a00a194b6732c15d9cd1ede6a821e_428	8aa1aaefd30e370458343f447b9298d5_592	S_aureus_12_00125
WP_000656768.1		TetR/AcrR family transcriptional regulator	4	4	1	1	748				623	623	623	34e9a6678acca924fbf24c6bf5608d56_4903	455a00a194b6732c15d9cd1ede6a821e_4949	8aa1aaefd30e370458343f447b9298d5_4922	S_aureus_12_00784
WP_000290301.1		YlbF/YmcA family competence regulator	4	4	1	1	3003				344	344	344	34e9a6678acca924fbf24c6bf5608d56_3793	455a00a194b6732c15d9cd1ede6a821e_3882	8aa1aaefd30e370458343f447b9298d5_3762	S_aureus_12_01941
WP_000158375.1		phosphoglycerate mutase family protein	4	4	1	1	1215				581	581	581	34e9a6678acca924fbf24c6bf5608d56_688	455a00a194b6732c15d9cd1ede6a821e_730	8aa1aaefd30e370458343f447b9298d5_817	S_aureus_12_00016
WP_001798062.1		hypothetical protein	4	5	1.25	1	2387				107	992	746	34e9a6678acca924fbf24c6bf5608d56_1603	455a00a194b6732c15d9cd1ede6a821e_1706	8aa1aaefd30e370458343f447b9298d5_1781 8aa1aaefd30e370458343f447b9298d5_1779	S_aureus_12_01251
fni		type 2 isopentenyl-diphosphate Delta-isomerase	4	4	1	1	783				1049	1049	1049	34e9a6678acca924fbf24c6bf5608d56_4831	455a00a194b6732c15d9cd1ede6a821e_4877	8aa1aaefd30e370458343f447b9298d5_4848	S_aureus_12_00750
rocF		arginase	4	4	1	1	2910				908	908	908	34e9a6678acca924fbf24c6bf5608d56_4435	455a00a194b6732c15d9cd1ede6a821e_4478	8aa1aaefd30e370458343f447b9298d5_4454	S_aureus_12_02055
murQ		N-acetylmuramic acid 6-phosphate etherase	4	4	1	1	1868				896	896	896	34e9a6678acca924fbf24c6bf5608d56_313	455a00a194b6732c15d9cd1ede6a821e_284	8aa1aaefd30e370458343f447b9298d5_448	S_aureus_12_00193
WP_000755954.1		(deoxy)nucleoside triphosphate pyrophosphohydrolase	4	4	1	1	634				392	392	392	34e9a6678acca924fbf24c6bf5608d56_5137	455a00a194b6732c15d9cd1ede6a821e_5181	8aa1aaefd30e370458343f447b9298d5_5158	S_aureus_12_00308
nusA		transcription termination factor NusA	4	4	1	1	1741				1175	1175	1175	34e9a6678acca924fbf24c6bf5608d56_2416	455a00a194b6732c15d9cd1ede6a821e_2466	8aa1aaefd30e370458343f447b9298d5_2547	S_aureus_12_01752
WP_000398941.1		ABC transporter permease	4	4	1	1	678				695	695	695	34e9a6678acca924fbf24c6bf5608d56_5047	455a00a194b6732c15d9cd1ede6a821e_5095	8aa1aaefd30e370458343f447b9298d5_5066	S_aureus_12_00852
WP_000368687.1		hypothetical protein	4	4	1	1	2377				236	236	236	34e9a6678acca924fbf24c6bf5608d56_1583	455a00a194b6732c15d9cd1ede6a821e_1686	8aa1aaefd30e370458343f447b9298d5_1759	S_aureus_12_01261
nrdI		class Ib ribonucleoside-diphosphate reductase assembly flavoprotein NrdI	4	4	1	1	2294				398	398	398	34e9a6678acca924fbf24c6bf5608d56_1437	455a00a194b6732c15d9cd1ede6a821e_1540	8aa1aaefd30e370458343f447b9298d5_1569	S_aureus_12_01355
rpsQ		30S ribosomal protein S17	4	4	1	1	890				263	263	263	34e9a6678acca924fbf24c6bf5608d56_4616	455a00a194b6732c15d9cd1ede6a821e_4662	8aa1aaefd30e370458343f447b9298d5_4631	S_aureus_12_00648
WP_000808894.1		aldo/keto reductase	4	4	1	1	1363				938	938	938	34e9a6678acca924fbf24c6bf5608d56_1167	455a00a194b6732c15d9cd1ede6a821e_1204	8aa1aaefd30e370458343f447b9298d5_1301	S_aureus_12_01484
WP_000241604.1		GNAT family N-acetyltransferase	4	4	1	1	753				335	401	384	34e9a6678acca924fbf24c6bf5608d56_4893	455a00a194b6732c15d9cd1ede6a821e_4939	8aa1aaefd30e370458343f447b9298d5_4912	S_aureus_12_00780
WP_000437967.1		GAF domain-containing sensor histidine kinase	4	4	1	1	3007				1112	1112	1112	34e9a6678acca924fbf24c6bf5608d56_3801	455a00a194b6732c15d9cd1ede6a821e_3890	8aa1aaefd30e370458343f447b9298d5_3770	S_aureus_12_01945
WP_000606480.1		YlbF family regulator	4	4	1	1	2207				434	434	434	34e9a6678acca924fbf24c6bf5608d56_2111	455a00a194b6732c15d9cd1ede6a821e_2161	8aa1aaefd30e370458343f447b9298d5_2242	S_aureus_12_01579
yycF		response regulator YycF	4	4	1	1	2151				701	701	701	34e9a6678acca924fbf24c6bf5608d56_45	455a00a194b6732c15d9cd1ede6a821e_45	8aa1aaefd30e370458343f447b9298d5_45	S_aureus_12_00543
recG		ATP-dependent DNA helicase RecG	4	4	1	1	1701				2060	2060	2060	34e9a6678acca924fbf24c6bf5608d56_2334	455a00a194b6732c15d9cd1ede6a821e_2384	8aa1aaefd30e370458343f447b9298d5_2465	S_aureus_12_01791
WP_000690209.1		metallophosphoesterase	4	4	1	1	686				806	806	806	34e9a6678acca924fbf24c6bf5608d56_5031	455a00a194b6732c15d9cd1ede6a821e_5079	8aa1aaefd30e370458343f447b9298d5_5050	S_aureus_12_00844
WP_000491755.1		DUF47 domain-containing protein	4	4	1	1	1155				617	617	617	34e9a6678acca924fbf24c6bf5608d56_1295	455a00a194b6732c15d9cd1ede6a821e_1332	8aa1aaefd30e370458343f447b9298d5_1429	S_aureus_12_01422
hisC		histidinol-phosphate transaminase	4	4	1	1	2286				1058	1058	1058	34e9a6678acca924fbf24c6bf5608d56_1421	455a00a194b6732c15d9cd1ede6a821e_1524	8aa1aaefd30e370458343f447b9298d5_1555	S_aureus_12_01362
WP_000211594.1		complement inhibitor SCIN family protein	4	4	1	1	1943				344	344	344	34e9a6678acca924fbf24c6bf5608d56_373	455a00a194b6732c15d9cd1ede6a821e_342	8aa1aaefd30e370458343f447b9298d5_506	S_aureus_12_00165
WP_000241588.1		Asp23/Gls24 family envelope stress response protein	4	4	1	1	1465				362	362	362	34e9a6678acca924fbf24c6bf5608d56_3113	455a00a194b6732c15d9cd1ede6a821e_3184	8aa1aaefd30e370458343f447b9298d5_3087	S_aureus_12_01059
WP_000815795.1		PTS sugar transporter subunit IIB	4	4	1	1	1923				278	278	278	34e9a6678acca924fbf24c6bf5608d56_415	455a00a194b6732c15d9cd1ede6a821e_384	8aa1aaefd30e370458343f447b9298d5_548	S_aureus_12_00147
narJ		nitrate reductase molybdenum cofactor assembly chaperone	4	4	1	1	730				575	590	578	34e9a6678acca924fbf24c6bf5608d56_4939	455a00a194b6732c15d9cd1ede6a821e_4987	8aa1aaefd30e370458343f447b9298d5_4958	S_aureus_12_00802
thiW		energy coupling factor transporter S component ThiW	4	4	1	1	1769				491	491	491	34e9a6678acca924fbf24c6bf5608d56_2472	455a00a194b6732c15d9cd1ede6a821e_2522	8aa1aaefd30e370458343f447b9298d5_2603	S_aureus_12_01724
queD		6-carboxytetrahydropterin synthase QueD	4	4	1	1	2056				419	419	419	34e9a6678acca924fbf24c6bf5608d56_1395	455a00a194b6732c15d9cd1ede6a821e_1498	8aa1aaefd30e370458343f447b9298d5_1529	S_aureus_12_01374
WP_001245566.1		iron chelate uptake ABC transporter family permease subunit	4	4	1	1	2298				956	956	956	34e9a6678acca924fbf24c6bf5608d56_1445	455a00a194b6732c15d9cd1ede6a821e_1548	8aa1aaefd30e370458343f447b9298d5_1577	S_aureus_12_01351
WP_001044966.1		tyrosine-type recombinase/integrase	4	4	1	1	1343				560	560	560	34e9a6678acca924fbf24c6bf5608d56_1209	455a00a194b6732c15d9cd1ede6a821e_1246	8aa1aaefd30e370458343f447b9298d5_1343	S_aureus_12_01464
WP_000234803.1		thioesterase family protein	4	4	1	1	781				491	491	491	34e9a6678acca924fbf24c6bf5608d56_4835	455a00a194b6732c15d9cd1ede6a821e_4881	8aa1aaefd30e370458343f447b9298d5_4852	S_aureus_12_00752
rsmA		16S rRNA (adenine(1518)-N(6)/adenine(1519)-N(6))-dimethyltransferase RsmA	4	4	1	1	2679				893	893	893	34e9a6678acca924fbf24c6bf5608d56_894	455a00a194b6732c15d9cd1ede6a821e_940	8aa1aaefd30e370458343f447b9298d5_1025	S_aureus_12_02537
rpmI		50S ribosomal protein L35	4	4	1	1	11				200	200	200	34e9a6678acca924fbf24c6bf5608d56_3417	455a00a194b6732c15d9cd1ede6a821e_3484	8aa1aaefd30e370458343f447b9298d5_3385	S_aureus_12_02119
WP_000449218.1		NAD(P)H-hydrate dehydratase	4	4	1	1	2140				812	812	812	34e9a6678acca924fbf24c6bf5608d56_15	455a00a194b6732c15d9cd1ede6a821e_15	8aa1aaefd30e370458343f447b9298d5_15	S_aureus_12_00530
sei		staphylococcal enterotoxin type I	4	4	1	1	2984				728	728	728	34e9a6678acca924fbf24c6bf5608d56_3733	455a00a194b6732c15d9cd1ede6a821e_3822	8aa1aaefd30e370458343f447b9298d5_3702	S_aureus_12_01915
WP_000664777.1		insulinase family protein	4	4	1	1	1754				1286	1286	1286	34e9a6678acca924fbf24c6bf5608d56_2442	455a00a194b6732c15d9cd1ede6a821e_2492	8aa1aaefd30e370458343f447b9298d5_2573	S_aureus_12_01739
hlgA		bi-component gamma-hemolysin HlgAB subunit A	4	4	1	1	704				929	965	938	34e9a6678acca924fbf24c6bf5608d56_4993	455a00a194b6732c15d9cd1ede6a821e_5041	8aa1aaefd30e370458343f447b9298d5_5012	S_aureus_12_00827
WP_000586234.1		hypothetical protein	4	4	1	1	422				497	497	497	34e9a6678acca924fbf24c6bf5608d56_5569	455a00a194b6732c15d9cd1ede6a821e_5612	8aa1aaefd30e370458343f447b9298d5_5594	S_aureus_12_00511
WP_000776412.1		type II secretion system F family protein	4	4	1	1	1447				1070	1070	1070	34e9a6678acca924fbf24c6bf5608d56_3150	455a00a194b6732c15d9cd1ede6a821e_3221	8aa1aaefd30e370458343f447b9298d5_3124	S_aureus_12_01076
WP_000125075.1		ImmA/IrrE family metallo-endopeptidase	4	4	1	1	200				569	569	569	34e9a6678acca924fbf24c6bf5608d56_3671	455a00a194b6732c15d9cd1ede6a821e_3753	8aa1aaefd30e370458343f447b9298d5_3640	S_aureus_12_01886
WP_000857616.1		amino acid ABC transporter ATP-binding/permease protein	4	4	1	1	2082				1673	1673	1673	34e9a6678acca924fbf24c6bf5608d56_1343	455a00a194b6732c15d9cd1ede6a821e_1446	8aa1aaefd30e370458343f447b9298d5_1477	S_aureus_12_01400
WP_000600967.1		VOC family protein	4	4	1	1	866				764	764	764	34e9a6678acca924fbf24c6bf5608d56_4664	455a00a194b6732c15d9cd1ede6a821e_4710	8aa1aaefd30e370458343f447b9298d5_4679	S_aureus_12_00670
mazE		type II toxin-antitoxin system antitoxin MazE	4	4	1	1	2817				170	170	170	34e9a6678acca924fbf24c6bf5608d56_4246	455a00a194b6732c15d9cd1ede6a821e_4287	8aa1aaefd30e370458343f447b9298d5_4265	S_aureus_12_01965
liaF		cell wall-active antibiotics response protein LiaF	4	4	1	1	1061				701	701	701	34e9a6678acca924fbf24c6bf5608d56_3966	455a00a194b6732c15d9cd1ede6a821e_4052	8aa1aaefd30e370458343f447b9298d5_3932	S_aureus_12_02198
WP_000068176.1		alpha-ketoacid dehydrogenase subunit beta	4	4	1	1	2608				977	977	977	34e9a6678acca924fbf24c6bf5608d56_2061	455a00a194b6732c15d9cd1ede6a821e_2111	8aa1aaefd30e370458343f447b9298d5_2192	S_aureus_12_01603
group_1938	lepB	signal peptidase I	4	4	1	1	2045				575	575	575	34e9a6678acca924fbf24c6bf5608d56_1776	455a00a194b6732c15d9cd1ede6a821e_1829	8aa1aaefd30e370458343f447b9298d5_1904	S_aureus_12_01192
WP_001236733.1		DUF4930 family protein	4	4	1	1	260				473	473	473	34e9a6678acca924fbf24c6bf5608d56_3366	455a00a194b6732c15d9cd1ede6a821e_3437	8aa1aaefd30e370458343f447b9298d5_3338	S_aureus_12_01180
WP_000757584.1		glycerophosphodiester phosphodiesterase	4	4	1	1	2208				929	929	929	34e9a6678acca924fbf24c6bf5608d56_2113	455a00a194b6732c15d9cd1ede6a821e_2163	8aa1aaefd30e370458343f447b9298d5_2244	S_aureus_12_01578
bshB2		bacillithiol biosynthesis deacetylase BshB2	4	4	1	1	2714				665	665	665	34e9a6678acca924fbf24c6bf5608d56_1097	455a00a194b6732c15d9cd1ede6a821e_1136	8aa1aaefd30e370458343f447b9298d5_1233	S_aureus_12_01518
WP_000604802.1		aminodeoxychorismate/anthranilate synthase component II	4	4	1	1	2020				566	566	566	34e9a6678acca924fbf24c6bf5608d56_2656	455a00a194b6732c15d9cd1ede6a821e_2742	8aa1aaefd30e370458343f447b9298d5_2761	S_aureus_12_02364
WP_000908950.1		hypothetical protein	4	4	1	1	1291				602	602	602	34e9a6678acca924fbf24c6bf5608d56_127	455a00a194b6732c15d9cd1ede6a821e_98	8aa1aaefd30e370458343f447b9298d5_264	S_aureus_12_00285
WP_000654027.1		sugar-binding transcriptional regulator	4	4	1	1	2338				1013	1013	1013	34e9a6678acca924fbf24c6bf5608d56_1524	455a00a194b6732c15d9cd1ede6a821e_1627	8aa1aaefd30e370458343f447b9298d5_1656	S_aureus_12_01311
raiA		ribosome-associated translation inhibitor RaiA	4	4	1	1	2316				572	572	572	34e9a6678acca924fbf24c6bf5608d56_1481	455a00a194b6732c15d9cd1ede6a821e_1584	8aa1aaefd30e370458343f447b9298d5_1613	S_aureus_12_01333
WP_000904312.1		TatD family hydrolase	4	4	1	1	2677				773	773	773	34e9a6678acca924fbf24c6bf5608d56_890	455a00a194b6732c15d9cd1ede6a821e_936	8aa1aaefd30e370458343f447b9298d5_1021	S_aureus_12_02539
WP_000913006.1		ATP-binding cassette domain-containing protein	4	4	1	1	852				605	605	605	34e9a6678acca924fbf24c6bf5608d56_4692	455a00a194b6732c15d9cd1ede6a821e_4738	8aa1aaefd30e370458343f447b9298d5_4707	S_aureus_12_00683
WP_000800700.1		NCS2 family permease	4	4	1	1	878				1334	1334	1334	34e9a6678acca924fbf24c6bf5608d56_4640	455a00a194b6732c15d9cd1ede6a821e_4686	8aa1aaefd30e370458343f447b9298d5_4655	S_aureus_12_00660
WP_000436832.1		DUF805 domain-containing protein	4	4	1	1	786				647	647	647	34e9a6678acca924fbf24c6bf5608d56_4825	455a00a194b6732c15d9cd1ede6a821e_4871	8aa1aaefd30e370458343f447b9298d5_4842	S_aureus_12_00747
WP_000172879.1		fatty acid desaturase family protein	4	4	1	1	617				947	980	971	34e9a6678acca924fbf24c6bf5608d56_5173	455a00a194b6732c15d9cd1ede6a821e_5215	8aa1aaefd30e370458343f447b9298d5_5196	S_aureus_12_00325
WP_000120115.1		PTS galactitol transporter subunit IIC	4	4	1	1	1922				1259	1259	1259	34e9a6678acca924fbf24c6bf5608d56_417	455a00a194b6732c15d9cd1ede6a821e_386	8aa1aaefd30e370458343f447b9298d5_550	S_aureus_12_00146
WP_000089941.1		insulinase family protein	4	4	1	1	1753				1265	1265	1265	34e9a6678acca924fbf24c6bf5608d56_2440	455a00a194b6732c15d9cd1ede6a821e_2490	8aa1aaefd30e370458343f447b9298d5_2571	S_aureus_12_01740
gcvH		glycine cleavage system protein GcvH	4	4	1	1	2386				380	380	380	34e9a6678acca924fbf24c6bf5608d56_1601	455a00a194b6732c15d9cd1ede6a821e_1704	8aa1aaefd30e370458343f447b9298d5_1777	S_aureus_12_01252
rpsN		30S ribosomal protein S14	4	4	1	1	2500				269	269	269	34e9a6678acca924fbf24c6bf5608d56_2588	455a00a194b6732c15d9cd1ede6a821e_2674	8aa1aaefd30e370458343f447b9298d5_2693	S_aureus_12_02439
yycI		two-component system regulatory protein YycI	4	4	1	1	2154				788	788	788	34e9a6678acca924fbf24c6bf5608d56_51	455a00a194b6732c15d9cd1ede6a821e_51	8aa1aaefd30e370458343f447b9298d5_51	S_aureus_12_00546
rbsK		ribokinase	4	4	1	1	1899				914	914	914	34e9a6678acca924fbf24c6bf5608d56_463	455a00a194b6732c15d9cd1ede6a821e_432	8aa1aaefd30e370458343f447b9298d5_596	S_aureus_12_00124
WP_001293307.1		GntR family transcriptional regulator	4	4	1	1	1752				713	713	713	34e9a6678acca924fbf24c6bf5608d56_2438	455a00a194b6732c15d9cd1ede6a821e_2488	8aa1aaefd30e370458343f447b9298d5_2569	S_aureus_12_01741
WP_000691584.1		GntR family transcriptional regulator	4	4	1	1	1114				380	380	380	34e9a6678acca924fbf24c6bf5608d56_4072	455a00a194b6732c15d9cd1ede6a821e_4158	8aa1aaefd30e370458343f447b9298d5_4038	S_aureus_12_02150
WP_000971498.1		hypothetical protein	4	4	1	1	2629				323	323	323	34e9a6678acca924fbf24c6bf5608d56_777	455a00a194b6732c15d9cd1ede6a821e_823	8aa1aaefd30e370458343f447b9298d5_908	S_aureus_12_02257
infA		translation initiation factor IF-1	4	4	1	1	903				218	218	218	34e9a6678acca924fbf24c6bf5608d56_4590	455a00a194b6732c15d9cd1ede6a821e_4636	8aa1aaefd30e370458343f447b9298d5_4605	S_aureus_12_00635
WP_001573681.1		hypothetical protein	4	4	1	1	612				905	1079	1035	34e9a6678acca924fbf24c6bf5608d56_5183	455a00a194b6732c15d9cd1ede6a821e_5225	8aa1aaefd30e370458343f447b9298d5_5206	S_aureus_12_00330
WP_001049957.1		peptide chain release factor 3	4	4	1	1	2537				1562	1562	1562	34e9a6678acca924fbf24c6bf5608d56_1897	455a00a194b6732c15d9cd1ede6a821e_1948	8aa1aaefd30e370458343f447b9298d5_2025	S_aureus_12_01678
ftnA		H-type ferritin FtnA	4	4	1	1	1069				500	500	500	34e9a6678acca924fbf24c6bf5608d56_3982	455a00a194b6732c15d9cd1ede6a821e_4068	8aa1aaefd30e370458343f447b9298d5_3948	S_aureus_12_02191
WP_000410718.1		hypothetical protein	4	4	1	1	2553				287	287	287	34e9a6678acca924fbf24c6bf5608d56_1936	455a00a194b6732c15d9cd1ede6a821e_1986	8aa1aaefd30e370458343f447b9298d5_2065	S_aureus_12_01663
WP_001065804.1		thioredoxin family protein	4	4	1	1	2389				296	296	296	34e9a6678acca924fbf24c6bf5608d56_1607	455a00a194b6732c15d9cd1ede6a821e_1710	8aa1aaefd30e370458343f447b9298d5_1785	S_aureus_12_01249
WP_000184383.1		acyl-CoA thioesterase	4	4	1	1	1053				530	530	530	34e9a6678acca924fbf24c6bf5608d56_3950	455a00a194b6732c15d9cd1ede6a821e_4036	8aa1aaefd30e370458343f447b9298d5_3916	S_aureus_12_02206
WP_000655867.1		ribose 5-phosphate isomerase A	4	4	1	1	793				686	686	686	34e9a6678acca924fbf24c6bf5608d56_4811	455a00a194b6732c15d9cd1ede6a821e_4857	8aa1aaefd30e370458343f447b9298d5_4828	S_aureus_12_00741
WP_001030476.1		hypothetical protein	4	4	1	1	177				443	443	443	34e9a6678acca924fbf24c6bf5608d56_3624	455a00a194b6732c15d9cd1ede6a821e_3704	8aa1aaefd30e370458343f447b9298d5_3593	S_aureus_12_01863
sbnA		2,3-diaminopropionate biosynthesis protein SbnA	4	4	1	1	1274				980	980	980	34e9a6678acca924fbf24c6bf5608d56_161	455a00a194b6732c15d9cd1ede6a821e_132	8aa1aaefd30e370458343f447b9298d5_298	S_aureus_12_00268
WP_000163281.1		type 1 glutamine amidotransferase	4	4	1	1	1050				515	515	515	34e9a6678acca924fbf24c6bf5608d56_3944	455a00a194b6732c15d9cd1ede6a821e_4030	8aa1aaefd30e370458343f447b9298d5_3910	S_aureus_12_02209
WP_001030763.1		alpha/beta hydrolase	4	4	1	1	1147				1043	1043	1043	34e9a6678acca924fbf24c6bf5608d56_1279	455a00a194b6732c15d9cd1ede6a821e_1316	8aa1aaefd30e370458343f447b9298d5_1413	S_aureus_12_01430
WP_000353632.1		PTS fructose transporter subunit IIC	4	4	1	1	597				995	1043	1031	34e9a6678acca924fbf24c6bf5608d56_5215	455a00a194b6732c15d9cd1ede6a821e_5257	8aa1aaefd30e370458343f447b9298d5_5238	S_aureus_12_00344
WP_000790325.1		LacI family DNA-binding transcriptional regulator	4	4	1	1	2787				950	950	950	34e9a6678acca924fbf24c6bf5608d56_4168	455a00a194b6732c15d9cd1ede6a821e_4212	8aa1aaefd30e370458343f447b9298d5_4190	S_aureus_12_02337
mprF		bifunctional lysylphosphatidylglycerol flippase/synthetase MprF	4	4	1	1	2525				2522	2522	2522	34e9a6678acca924fbf24c6bf5608d56_2638	455a00a194b6732c15d9cd1ede6a821e_2724	8aa1aaefd30e370458343f447b9298d5_2743	S_aureus_12_02461
WP_000076914.1		ThiF family adenylyltransferase	4	4	1	1	853				1004	1004	1004	34e9a6678acca924fbf24c6bf5608d56_4690	455a00a194b6732c15d9cd1ede6a821e_4736	8aa1aaefd30e370458343f447b9298d5_4705	S_aureus_12_00682
folK		2-amino-4-hydroxy-6-hydroxymethyldihydropteridine diphosphokinase	4	4	1	1	2703				476	476	476	34e9a6678acca924fbf24c6bf5608d56_942	455a00a194b6732c15d9cd1ede6a821e_988	8aa1aaefd30e370458343f447b9298d5_1073	S_aureus_12_02514
atpG		F0F1 ATP synthase subunit gamma	4	4	1	1	2852				866	866	866	34e9a6678acca924fbf24c6bf5608d56_4319	455a00a194b6732c15d9cd1ede6a821e_4360	8aa1aaefd30e370458343f447b9298d5_4340	S_aureus_12_01999
spn		myeloperoxidase inhibitor SPIN	4	4	1	1	1195				308	308	308	34e9a6678acca924fbf24c6bf5608d56_763	455a00a194b6732c15d9cd1ede6a821e_805	8aa1aaefd30e370458343f447b9298d5_890	S_aureus_12_02268
WP_000362222.1		DnaD domain-containing protein	4	4	1	1	1654				686	686	686	34e9a6678acca924fbf24c6bf5608d56_2828	455a00a194b6732c15d9cd1ede6a821e_2913	8aa1aaefd30e370458343f447b9298d5_2932	S_aureus_12_00916
WP_000606761.1		isochorismatase family protein	4	4	1	1	1863				557	557	557	34e9a6678acca924fbf24c6bf5608d56_303	455a00a194b6732c15d9cd1ede6a821e_274	8aa1aaefd30e370458343f447b9298d5_438	S_aureus_12_00198
WP_000192947.1		YigZ family protein	4	4	1	1	2312				641	641	641	34e9a6678acca924fbf24c6bf5608d56_1473	455a00a194b6732c15d9cd1ede6a821e_1576	8aa1aaefd30e370458343f447b9298d5_1605	S_aureus_12_01337
sucD		succinate--CoA ligase subunit alpha	4	4	1	1	1720				908	908	908	34e9a6678acca924fbf24c6bf5608d56_2372	455a00a194b6732c15d9cd1ede6a821e_2422	8aa1aaefd30e370458343f447b9298d5_2503	S_aureus_12_01772
WP_000267243.1		nitronate monooxygenase family protein	4	4	1	1	2265				1067	1067	1067	34e9a6678acca924fbf24c6bf5608d56_1686	455a00a194b6732c15d9cd1ede6a821e_1739	8aa1aaefd30e370458343f447b9298d5_1814	S_aureus_12_01236
WP_000603493.1		hypothetical protein	4	4	1	1	465				359	359	359	34e9a6678acca924fbf24c6bf5608d56_5483	455a00a194b6732c15d9cd1ede6a821e_5526	8aa1aaefd30e370458343f447b9298d5_5506	S_aureus_12_00467
WP_000706117.1		PTS fructose transporter subunit IIABC	4	4	1	1	483				1952	1952	1952	34e9a6678acca924fbf24c6bf5608d56_5449	455a00a194b6732c15d9cd1ede6a821e_5489	8aa1aaefd30e370458343f447b9298d5_5470	S_aureus_12_00449
WP_000769829.1		superantigen-like protein SSL7	4	4	1	1	1203				695	695	695	34e9a6678acca924fbf24c6bf5608d56_747	455a00a194b6732c15d9cd1ede6a821e_789	8aa1aaefd30e370458343f447b9298d5_874	S_aureus_12_02275
WP_001213992.1		YbaB/EbfC family nucleoid-associated protein	4	4	1	1	2665				317	317	317	34e9a6678acca924fbf24c6bf5608d56_855	455a00a194b6732c15d9cd1ede6a821e_901	8aa1aaefd30e370458343f447b9298d5_986	S_aureus_12_02226
WP_000691309.1		exonuclease SbcCD subunit D	4	4	1	1	2511				1121	1121	1121	34e9a6678acca924fbf24c6bf5608d56_2610	455a00a194b6732c15d9cd1ede6a821e_2696	8aa1aaefd30e370458343f447b9298d5_2715	S_aureus_12_02448
WP_000477517.1		response regulator transcription factor	4	4	1	1	1890				758	758	758	34e9a6678acca924fbf24c6bf5608d56_357	455a00a194b6732c15d9cd1ede6a821e_328	8aa1aaefd30e370458343f447b9298d5_492	S_aureus_12_00171
WP_000035000.1		DUF2529 domain-containing protein	4	4	1	1	2874				521	521	521	34e9a6678acca924fbf24c6bf5608d56_4363	455a00a194b6732c15d9cd1ede6a821e_4404	8aa1aaefd30e370458343f447b9298d5_4384	S_aureus_12_02021
WP_000659770.1		formate/nitrite transporter family protein	4	4	1	1	371				824	824	824	34e9a6678acca924fbf24c6bf5608d56_545	455a00a194b6732c15d9cd1ede6a821e_503	8aa1aaefd30e370458343f447b9298d5_672	S_aureus_12_00086
WP_000028598.1		type I restriction-modification system subunit M	4	4	1	1	1199				1556	1556	1556	34e9a6678acca924fbf24c6bf5608d56_755	455a00a194b6732c15d9cd1ede6a821e_797	8aa1aaefd30e370458343f447b9298d5_882	S_aureus_12_02272
group_199	ptsG	glucose-specific PTS transporter subunit IIBC	4	4	1	1	591				2066	2123	2080	34e9a6678acca924fbf24c6bf5608d56_5227	455a00a194b6732c15d9cd1ede6a821e_5269	8aa1aaefd30e370458343f447b9298d5_5250	S_aureus_12_00350
WP_001059082.1		cold-shock protein	4	4	1	1	2370				200	200	200	34e9a6678acca924fbf24c6bf5608d56_1569	455a00a194b6732c15d9cd1ede6a821e_1672	8aa1aaefd30e370458343f447b9298d5_1745	S_aureus_12_01268
WP_000447706.1		DUF4176 domain-containing protein	4	4	1	1	545				296	296	296	34e9a6678acca924fbf24c6bf5608d56_5321	455a00a194b6732c15d9cd1ede6a821e_5363	8aa1aaefd30e370458343f447b9298d5_5344	S_aureus_12_00394
WP_000026308.1		hypothetical protein	4	4	1	1	1762				215	215	215	34e9a6678acca924fbf24c6bf5608d56_2458	455a00a194b6732c15d9cd1ede6a821e_2508	8aa1aaefd30e370458343f447b9298d5_2589	S_aureus_12_01731
WP_000836472.1		rhodanese-like domain-containing protein	4	4	1	1	157				311	311	311	34e9a6678acca924fbf24c6bf5608d56_3583	455a00a194b6732c15d9cd1ede6a821e_3661	8aa1aaefd30e370458343f447b9298d5_3552	S_aureus_12_01844
rpoZ		DNA-directed RNA polymerase subunit omega	4	4	1	1	1806				218	218	218	34e9a6678acca924fbf24c6bf5608d56_2300	455a00a194b6732c15d9cd1ede6a821e_2350	8aa1aaefd30e370458343f447b9298d5_2431	S_aureus_12_01808
WP_001044451.1		M23 family metallopeptidase	4	4	1	1	2951				854	854	854	34e9a6678acca924fbf24c6bf5608d56_4548	455a00a194b6732c15d9cd1ede6a821e_4591	8aa1aaefd30e370458343f447b9298d5_4565	S_aureus_12_00618
hslO		Hsp33 family molecular chaperone HslO	4	4	1	1	2699				881	881	881	34e9a6678acca924fbf24c6bf5608d56_934	455a00a194b6732c15d9cd1ede6a821e_980	8aa1aaefd30e370458343f447b9298d5_1065	S_aureus_12_02518
WP_000682089.1		YjzD family protein	4	4	1	1	1959				185	185	185	34e9a6678acca924fbf24c6bf5608d56_1810	455a00a194b6732c15d9cd1ede6a821e_1863	8aa1aaefd30e370458343f447b9298d5_1938	S_aureus_12_02620
WP_000431306.1		hypothetical protein	4	4	1	1	290				218	218	218	34e9a6678acca924fbf24c6bf5608d56_517	455a00a194b6732c15d9cd1ede6a821e_488	8aa1aaefd30e370458343f447b9298d5_650	S_aureus_12_00098
WP_000998559.1		hypothetical protein	4	4	1	1	1810				212	212	212	34e9a6678acca924fbf24c6bf5608d56_2292	455a00a194b6732c15d9cd1ede6a821e_2342	8aa1aaefd30e370458343f447b9298d5_2423	S_aureus_12_01812
WP_000470336.1		hypothetical protein	4	9	2.25	1	1617				185	2042	983	34e9a6678acca924fbf24c6bf5608d56_2905 34e9a6678acca924fbf24c6bf5608d56_3033	455a00a194b6732c15d9cd1ede6a821e_2986 455a00a194b6732c15d9cd1ede6a821e_3104	8aa1aaefd30e370458343f447b9298d5_3007 8aa1aaefd30e370458343f447b9298d5_3009	S_aureus_12_00949 S_aureus_12_01020 S_aureus_12_01019
QOB71337.1		hypothetical protein	4	4	1	1	2400				641	641	641	34e9a6678acca924fbf24c6bf5608d56_1640	455a00a194b6732c15d9cd1ede6a821e_694	8aa1aaefd30e370458343f447b9298d5_1701	S_aureus_12_01289
ffh		signal recognition particle protein	4	4	1	1	1711				1367	1367	1367	34e9a6678acca924fbf24c6bf5608d56_2354	455a00a194b6732c15d9cd1ede6a821e_2404	8aa1aaefd30e370458343f447b9298d5_2485	S_aureus_12_01781
cap8E		type 8 capsular polysaccharide synthesis protein Cap8E	4	4	1	1	1830				1028	1028	1028	34e9a6678acca924fbf24c6bf5608d56_237	455a00a194b6732c15d9cd1ede6a821e_208	8aa1aaefd30e370458343f447b9298d5_372	S_aureus_12_00231
WP_000467645.1		GNAT family N-acetyltransferase	4	4	1	1	333				545	545	545	34e9a6678acca924fbf24c6bf5608d56_621	455a00a194b6732c15d9cd1ede6a821e_617	8aa1aaefd30e370458343f447b9298d5_748	S_aureus_12_00048
WP_001573602.1		hypothetical protein	4	4	1	1	1871				281	281	281	34e9a6678acca924fbf24c6bf5608d56_319	455a00a194b6732c15d9cd1ede6a821e_290	8aa1aaefd30e370458343f447b9298d5_454	S_aureus_12_00190
WP_001294646.1		PH domain-containing protein	4	4	1	1	2821				1577	1577	1577	34e9a6678acca924fbf24c6bf5608d56_4254	455a00a194b6732c15d9cd1ede6a821e_4295	8aa1aaefd30e370458343f447b9298d5_4273	S_aureus_12_01969
WP_000448898.1		alpha/beta hydrolase	4	4	1	1	549				830	830	830	34e9a6678acca924fbf24c6bf5608d56_5313	455a00a194b6732c15d9cd1ede6a821e_5355	8aa1aaefd30e370458343f447b9298d5_5336	S_aureus_12_00390
rplJ		50S ribosomal protein L10	4	4	1	1	2741				500	500	500	34e9a6678acca924fbf24c6bf5608d56_1041	455a00a194b6732c15d9cd1ede6a821e_1082	8aa1aaefd30e370458343f447b9298d5_1177	S_aureus_12_01546
WP_000415673.1		DUF4064 domain-containing protein	4	4	1	1	376				398	398	398	34e9a6678acca924fbf24c6bf5608d56_543	455a00a194b6732c15d9cd1ede6a821e_501	8aa1aaefd30e370458343f447b9298d5_670	S_aureus_12_00087
cap8G		type 8 capsular polysaccharide synthesis protein Cap8G	4	4	1	1	1832				1124	1124	1124	34e9a6678acca924fbf24c6bf5608d56_241	455a00a194b6732c15d9cd1ede6a821e_212	8aa1aaefd30e370458343f447b9298d5_376	S_aureus_12_00229
WP_000179900.1		TfoX/Sxy family protein	4	4	1	1	1292				296	296	296	34e9a6678acca924fbf24c6bf5608d56_125	455a00a194b6732c15d9cd1ede6a821e_96	8aa1aaefd30e370458343f447b9298d5_262	S_aureus_12_00286
WP_000136482.1		sugar O-acetyltransferase	4	4	1	1	573				581	599	594	34e9a6678acca924fbf24c6bf5608d56_5263	455a00a194b6732c15d9cd1ede6a821e_5305	8aa1aaefd30e370458343f447b9298d5_5286	S_aureus_12_00366
WP_000406855.1		2-oxo acid dehydrogenase subunit E2	4	4	1	1	1475				1274	1274	1274	34e9a6678acca924fbf24c6bf5608d56_3093	455a00a194b6732c15d9cd1ede6a821e_3164	8aa1aaefd30e370458343f447b9298d5_3067	S_aureus_12_01049
WP_000021445.1		S1 domain-containing RNA-binding protein	4	4	1	1	2695				401	401	401	34e9a6678acca924fbf24c6bf5608d56_926	455a00a194b6732c15d9cd1ede6a821e_972	8aa1aaefd30e370458343f447b9298d5_1057	S_aureus_12_02522
pnp		polyribonucleotide nucleotidyltransferase	4	4	1	1	1749				2096	2096	2096	34e9a6678acca924fbf24c6bf5608d56_2432	455a00a194b6732c15d9cd1ede6a821e_2482	8aa1aaefd30e370458343f447b9298d5_2563	S_aureus_12_01744
WP_001548498.1		YggS family pyridoxal phosphate-dependent enzyme	4	4	1	1	1379				668	668	668	34e9a6678acca924fbf24c6bf5608d56_2256	455a00a194b6732c15d9cd1ede6a821e_2306	8aa1aaefd30e370458343f447b9298d5_2387	S_aureus_12_02555
udk		uridine kinase	4	4	1	1	220				623	623	623	34e9a6678acca924fbf24c6bf5608d56_3282	455a00a194b6732c15d9cd1ede6a821e_3353	8aa1aaefd30e370458343f447b9298d5_3254	S_aureus_12_01142
group_2015	gap	type I glyceraldehyde-3-phosphate dehydrogenase	4	4	1	1	19				1025	1025	1025	34e9a6678acca924fbf24c6bf5608d56_3435	455a00a194b6732c15d9cd1ede6a821e_3501	8aa1aaefd30e370458343f447b9298d5_3402	S_aureus_12_02112
fakB1		fatty acid kinase binding subunit FakB1	4	4	1	1	2313				866	866	866	34e9a6678acca924fbf24c6bf5608d56_1475	455a00a194b6732c15d9cd1ede6a821e_1578	8aa1aaefd30e370458343f447b9298d5_1607	S_aureus_12_01336
WP_000186482.1		alpha/beta fold hydrolase family protein	4	4	1	1	2145				968	968	968	34e9a6678acca924fbf24c6bf5608d56_27	455a00a194b6732c15d9cd1ede6a821e_27	8aa1aaefd30e370458343f447b9298d5_27	S_aureus_12_00535
mreC		rod shape-determining protein MreC	4	4	1	1	258				842	842	842	34e9a6678acca924fbf24c6bf5608d56_3362	455a00a194b6732c15d9cd1ede6a821e_3433	8aa1aaefd30e370458343f447b9298d5_3334	S_aureus_12_01179
WP_000638419.1		CsbA family protein	4	4	1	1	2323				236	236	236	34e9a6678acca924fbf24c6bf5608d56_1494	455a00a194b6732c15d9cd1ede6a821e_1597	8aa1aaefd30e370458343f447b9298d5_1626	S_aureus_12_01328
WP_001791286.1		TetR/AcrR family transcriptional regulator	4	4	1	1	558				569	587	573	34e9a6678acca924fbf24c6bf5608d56_5295	455a00a194b6732c15d9cd1ede6a821e_5337	8aa1aaefd30e370458343f447b9298d5_5318	S_aureus_12_00381
WP_000058389.1		NAD-dependent malic enzyme	4	4	1	1	33				1229	1229	1229	34e9a6678acca924fbf24c6bf5608d56_3463	455a00a194b6732c15d9cd1ede6a821e_3529	8aa1aaefd30e370458343f447b9298d5_3430	S_aureus_12_02098
WP_001180271.1		ABC transporter permease	4	4	1	1	278				881	881	881	34e9a6678acca924fbf24c6bf5608d56_1840	455a00a194b6732c15d9cd1ede6a821e_1893	8aa1aaefd30e370458343f447b9298d5_1968	S_aureus_12_02134
WP_000527262.1		glucose PTS transporter subunit IIA	4	4	1	1	1903				791	791	791	34e9a6678acca924fbf24c6bf5608d56_455	455a00a194b6732c15d9cd1ede6a821e_424	8aa1aaefd30e370458343f447b9298d5_588	S_aureus_12_00127
WP_000714376.1		hypothetical protein	4	4	1	1	1289				482	482	482	34e9a6678acca924fbf24c6bf5608d56_131	455a00a194b6732c15d9cd1ede6a821e_102	8aa1aaefd30e370458343f447b9298d5_268	S_aureus_12_00283
WP_000002682.1		DUF2273 domain-containing protein	4	4	1	1	2929				239	239	239	34e9a6678acca924fbf24c6bf5608d56_4502	455a00a194b6732c15d9cd1ede6a821e_4545	8aa1aaefd30e370458343f447b9298d5_4521	S_aureus_12_00597
yidD		membrane protein insertion efficiency factor YidD	4	4	1	1	190				257	257	257	34e9a6678acca924fbf24c6bf5608d56_3651	455a00a194b6732c15d9cd1ede6a821e_3731	8aa1aaefd30e370458343f447b9298d5_3620	S_aureus_12_01876
atpD		F0F1 ATP synthase subunit beta	4	4	1	1	2851				1412	1412	1412	34e9a6678acca924fbf24c6bf5608d56_4317	455a00a194b6732c15d9cd1ede6a821e_4358	8aa1aaefd30e370458343f447b9298d5_4338	S_aureus_12_01998
der		ribosome biogenesis GTPase Der	4	4	1	1	1634				1310	1310	1310	34e9a6678acca924fbf24c6bf5608d56_2868	455a00a194b6732c15d9cd1ede6a821e_2953	8aa1aaefd30e370458343f447b9298d5_2972	S_aureus_12_00936
WP_000196911.1		ACT domain-containing protein	4	4	1	1	2802				254	254	254	34e9a6678acca924fbf24c6bf5608d56_4198	455a00a194b6732c15d9cd1ede6a821e_4242	8aa1aaefd30e370458343f447b9298d5_4220	S_aureus_12_02350
WP_001126664.1		Veg family protein	4	4	1	1	2680				263	263	263	34e9a6678acca924fbf24c6bf5608d56_896	455a00a194b6732c15d9cd1ede6a821e_942	8aa1aaefd30e370458343f447b9298d5_1027	S_aureus_12_02536
WP_001794490.1		hypothetical protein	4	4	1	1	557				320	500	455	34e9a6678acca924fbf24c6bf5608d56_5297	455a00a194b6732c15d9cd1ede6a821e_5339	8aa1aaefd30e370458343f447b9298d5_5320	S_aureus_12_00382
WP_000792332.1		BCCT family transporter	4	4	1	1	2931				1562	1562	1562	34e9a6678acca924fbf24c6bf5608d56_4506	455a00a194b6732c15d9cd1ede6a821e_4549	8aa1aaefd30e370458343f447b9298d5_4525	S_aureus_12_00599
WP_001167165.1		N-acetyltransferase	4	4	1	1	2364				530	530	530	34e9a6678acca924fbf24c6bf5608d56_1557	455a00a194b6732c15d9cd1ede6a821e_1660	8aa1aaefd30e370458343f447b9298d5_1733	S_aureus_12_01274
truA		tRNA pseudouridine(38-40) synthase TruA	4	4	1	1	2962				794	794	794	34e9a6678acca924fbf24c6bf5608d56_4572	455a00a194b6732c15d9cd1ede6a821e_4615	8aa1aaefd30e370458343f447b9298d5_4587	S_aureus_12_00626
pmtB		phenol-soluble modulin export ABC transporter permease subunit PmtB	4	4	1	1	1112				680	680	680	34e9a6678acca924fbf24c6bf5608d56_4068	455a00a194b6732c15d9cd1ede6a821e_4154	8aa1aaefd30e370458343f447b9298d5_4034	S_aureus_12_02152
WP_000723304.1		NAD-dependent epimerase/dehydratase family protein	4	4	1	1	2727				965	965	965	34e9a6678acca924fbf24c6bf5608d56_1069	455a00a194b6732c15d9cd1ede6a821e_1110	8aa1aaefd30e370458343f447b9298d5_1205	S_aureus_12_01532
WP_000175746.1		dihydrofolate reductase	4	4	1	1	1679				479	479	479	34e9a6678acca924fbf24c6bf5608d56_2775	455a00a194b6732c15d9cd1ede6a821e_2860	8aa1aaefd30e370458343f447b9298d5_2879	S_aureus_12_00891
mutM		bifunctional DNA-formamidopyrimidine glycosylase/DNA-(apurinic or apyrimidinic site) lyase	4	4	1	1	21				872	872	872	34e9a6678acca924fbf24c6bf5608d56_3439	455a00a194b6732c15d9cd1ede6a821e_3505	8aa1aaefd30e370458343f447b9298d5_3406	S_aureus_12_02110
WP_000428172.1		YtxH domain-containing protein	4	4	1	1	1057				275	275	275	34e9a6678acca924fbf24c6bf5608d56_3958	455a00a194b6732c15d9cd1ede6a821e_4044	8aa1aaefd30e370458343f447b9298d5_3924	S_aureus_12_02202
WP_000634691.1		galactose mutarotase	4	4	1	1	791				1019	1019	1019	34e9a6678acca924fbf24c6bf5608d56_4815	455a00a194b6732c15d9cd1ede6a821e_4861	8aa1aaefd30e370458343f447b9298d5_4832	S_aureus_12_00743
WP_000370937.1		Cof-type HAD-IIB family hydrolase	4	4	1	1	2899				857	857	857	34e9a6678acca924fbf24c6bf5608d56_4413	455a00a194b6732c15d9cd1ede6a821e_4456	8aa1aaefd30e370458343f447b9298d5_4432	S_aureus_12_02043
WP_000066361.1		hypothetical protein	4	4	1	1	544				338	368	360	34e9a6678acca924fbf24c6bf5608d56_5323	455a00a194b6732c15d9cd1ede6a821e_5365	8aa1aaefd30e370458343f447b9298d5_5346	S_aureus_12_00395
WP_000414222.1		hypothetical protein	4	4	1	1	198				572	572	572	34e9a6678acca924fbf24c6bf5608d56_3667	455a00a194b6732c15d9cd1ede6a821e_3747	8aa1aaefd30e370458343f447b9298d5_3636	S_aureus_12_01884
czrB		CDF family zinc efflux transporter CzrB	4	4	1	1	2894				980	980	980	34e9a6678acca924fbf24c6bf5608d56_4403	455a00a194b6732c15d9cd1ede6a821e_4444	8aa1aaefd30e370458343f447b9298d5_4424	S_aureus_12_02041
gmpC		dipeptide ABC transporter glycylmethionine-binding lipoprotein	4	4	1	1	2649				842	842	842	34e9a6678acca924fbf24c6bf5608d56_817	455a00a194b6732c15d9cd1ede6a821e_863	8aa1aaefd30e370458343f447b9298d5_948	S_aureus_12_02242
WP_000159960.1		CTP synthase	4	4	1	1	2875				1610	1610	1610	34e9a6678acca924fbf24c6bf5608d56_4365	455a00a194b6732c15d9cd1ede6a821e_4406	8aa1aaefd30e370458343f447b9298d5_4386	S_aureus_12_02022
WP_000197096.1		peptide ABC transporter substrate-binding protein	4	4	1	1	1967				1655	1655	1655	34e9a6678acca924fbf24c6bf5608d56_1826	455a00a194b6732c15d9cd1ede6a821e_1879	8aa1aaefd30e370458343f447b9298d5_1954	S_aureus_12_02612
WP_000231331.1		hypothetical protein	4	4	1	1	2470				233	233	233	34e9a6678acca924fbf24c6bf5608d56_2197	455a00a194b6732c15d9cd1ede6a821e_2247	8aa1aaefd30e370458343f447b9298d5_2328	S_aureus_12_02466
WP_000725226.1		CHAP domain-containing protein	4	4	1	1	562				767	767	767	34e9a6678acca924fbf24c6bf5608d56_5285	455a00a194b6732c15d9cd1ede6a821e_5327	8aa1aaefd30e370458343f447b9298d5_5308	S_aureus_12_00377
WP_001222103.1		TIGR00282 family metallophosphoesterase	4	4	1	1	1763				797	797	797	34e9a6678acca924fbf24c6bf5608d56_2460	455a00a194b6732c15d9cd1ede6a821e_2510	8aa1aaefd30e370458343f447b9298d5_2591	S_aureus_12_01730
WP_001573771.1		hypothetical protein	4	4	1	1	2771				341	341	341	34e9a6678acca924fbf24c6bf5608d56_4138	455a00a194b6732c15d9cd1ede6a821e_4180	8aa1aaefd30e370458343f447b9298d5_4158	S_aureus_12_02321
WP_000169038.1		DUF2922 domain-containing protein	4	4	1	1	1345				224	224	224	34e9a6678acca924fbf24c6bf5608d56_1205	455a00a194b6732c15d9cd1ede6a821e_1242	8aa1aaefd30e370458343f447b9298d5_1339	S_aureus_12_01466
WP_000621532.1		aspartate 1-decarboxylase	4	4	1	1	535				371	383	380	34e9a6678acca924fbf24c6bf5608d56_5343	455a00a194b6732c15d9cd1ede6a821e_5383	8aa1aaefd30e370458343f447b9298d5_5364	S_aureus_12_00404
WP_001076679.1		M42 family metallopeptidase	4	4	1	1	666				1076	1076	1076	34e9a6678acca924fbf24c6bf5608d56_5071	455a00a194b6732c15d9cd1ede6a821e_5119	8aa1aaefd30e370458343f447b9298d5_5090	S_aureus_12_00862
WP_000176401.1		ribonuclease HII	4	4	1	1	1718				767	767	767	34e9a6678acca924fbf24c6bf5608d56_2368	455a00a194b6732c15d9cd1ede6a821e_2418	8aa1aaefd30e370458343f447b9298d5_2499	S_aureus_12_01774
WP_000840812.1		DUF1641 domain-containing protein	4	4	1	1	821				473	473	473	34e9a6678acca924fbf24c6bf5608d56_4754	455a00a194b6732c15d9cd1ede6a821e_4800	8aa1aaefd30e370458343f447b9298d5_4771	S_aureus_12_00713
WP_000390829.1		PP2C family protein-serine/threonine phosphatase	4	4	1	1	2815				1001	1001	1001	34e9a6678acca924fbf24c6bf5608d56_4242	455a00a194b6732c15d9cd1ede6a821e_4283	8aa1aaefd30e370458343f447b9298d5_4261	S_aureus_12_01963
WP_000410770.1		HdeD family acid-resistance protein	4	4	1	1	426				512	512	512	34e9a6678acca924fbf24c6bf5608d56_5559	455a00a194b6732c15d9cd1ede6a821e_5602	8aa1aaefd30e370458343f447b9298d5_5584	S_aureus_12_00506
WP_000850000.1		MerR family transcriptional regulator	4	4	1	1	2948				416	416	416	34e9a6678acca924fbf24c6bf5608d56_4542	455a00a194b6732c15d9cd1ede6a821e_4585	8aa1aaefd30e370458343f447b9298d5_4559	S_aureus_12_00616
mnmE		tRNA uridine-5-carboxymethylaminomethyl(34) synthesis GTPase MnmE	4	4	1	1	411				1379	1379	1379	34e9a6678acca924fbf24c6bf5608d56_5589	455a00a194b6732c15d9cd1ede6a821e_5632	8aa1aaefd30e370458343f447b9298d5_5614	S_aureus_12_00521
rplB		50S ribosomal protein L2	4	4	1	1	884				833	833	833	34e9a6678acca924fbf24c6bf5608d56_4628	455a00a194b6732c15d9cd1ede6a821e_4674	8aa1aaefd30e370458343f447b9298d5_4643	S_aureus_12_00654
hprK		HPr(Ser) kinase/phosphatase	4	4	1	1	2326				932	932	932	34e9a6678acca924fbf24c6bf5608d56_1500	455a00a194b6732c15d9cd1ede6a821e_1603	8aa1aaefd30e370458343f447b9298d5_1632	S_aureus_12_01325
scpB		SMC-Scp complex subunit ScpB	4	4	1	1	1499				542	542	542	34e9a6678acca924fbf24c6bf5608d56_3043	455a00a194b6732c15d9cd1ede6a821e_3114	8aa1aaefd30e370458343f447b9298d5_3019	S_aureus_12_01025
WP_001791293.1		hypothetical protein	4	4	1	1	507				251	260	257	34e9a6678acca924fbf24c6bf5608d56_5403	455a00a194b6732c15d9cd1ede6a821e_5443	8aa1aaefd30e370458343f447b9298d5_5424	S_aureus_12_00428
codY		GTP-sensing pleiotropic transcriptional regulator CodY	4	4	1	1	1728				773	773	773	34e9a6678acca924fbf24c6bf5608d56_2390	455a00a194b6732c15d9cd1ede6a821e_2440	8aa1aaefd30e370458343f447b9298d5_2521	S_aureus_12_01763
hisA		1-(5-phosphoribosyl)-5-((5-phosphoribosylamino)methylideneamino)imidazole-4-carboxamide isomerase	4	4	1	1	450				704	704	704	34e9a6678acca924fbf24c6bf5608d56_5511	455a00a194b6732c15d9cd1ede6a821e_5554	8aa1aaefd30e370458343f447b9298d5_5536	S_aureus_12_00482
WP_000786119.1		YhgE/Pip domain-containing protein	4	4	1	1	481				2981	2981	2981	34e9a6678acca924fbf24c6bf5608d56_5453	455a00a194b6732c15d9cd1ede6a821e_5493	8aa1aaefd30e370458343f447b9298d5_5474	S_aureus_12_00451
ahpC		peroxiredoxin	4	4	1	1	1220				569	569	569	34e9a6678acca924fbf24c6bf5608d56_698	455a00a194b6732c15d9cd1ede6a821e_740	8aa1aaefd30e370458343f447b9298d5_827	S_aureus_12_00011
WP_000153340.1		SRPBCC domain-containing protein	4	4	1	1	720				467	467	467	34e9a6678acca924fbf24c6bf5608d56_4959	455a00a194b6732c15d9cd1ede6a821e_5007	8aa1aaefd30e370458343f447b9298d5_4978	S_aureus_12_00812
WP_001165054.1		protein VraC	4	4	1	1	1312				365	365	365	34e9a6678acca924fbf24c6bf5608d56_1115	455a00a194b6732c15d9cd1ede6a821e_1154	8aa1aaefd30e370458343f447b9298d5_1251	S_aureus_12_01509
WP_000660709.1		MFS transporter	4	4	1	1	620				1277	1277	1277	34e9a6678acca924fbf24c6bf5608d56_5167	455a00a194b6732c15d9cd1ede6a821e_5209	8aa1aaefd30e370458343f447b9298d5_5190	S_aureus_12_00322
WP_001001018.1		LrgB family protein	4	4	1	1	589				689	689	689	34e9a6678acca924fbf24c6bf5608d56_5231	455a00a194b6732c15d9cd1ede6a821e_5273	8aa1aaefd30e370458343f447b9298d5_5254	S_aureus_12_00352
mobA		molybdenum cofactor guanylyltransferase MobA	4	4	1	1	860				599	599	599	34e9a6678acca924fbf24c6bf5608d56_4676	455a00a194b6732c15d9cd1ede6a821e_4722	8aa1aaefd30e370458343f447b9298d5_4691	S_aureus_12_00675
bioD		dethiobiotin synthase	4	4	1	1	696				686	686	686	34e9a6678acca924fbf24c6bf5608d56_5009	455a00a194b6732c15d9cd1ede6a821e_5057	8aa1aaefd30e370458343f447b9298d5_5028	S_aureus_12_00835
cna		Cna B-type domain-containing protein	4	4	1	1	432				2990	3551	3270	34e9a6678acca924fbf24c6bf5608d56_5547	455a00a194b6732c15d9cd1ede6a821e_5590	8aa1aaefd30e370458343f447b9298d5_5572	S_aureus_12_00500
WP_000011827.1		hypothetical protein	4	4	1	1	2488				854	854	854	34e9a6678acca924fbf24c6bf5608d56_2564	455a00a194b6732c15d9cd1ede6a821e_2650	8aa1aaefd30e370458343f447b9298d5_2669	S_aureus_12_02428
lipA		lipoyl synthase	4	4	1	1	2261				917	917	917	34e9a6678acca924fbf24c6bf5608d56_1694	455a00a194b6732c15d9cd1ede6a821e_1747	8aa1aaefd30e370458343f447b9298d5_1822	S_aureus_12_01232
rpsC		30S ribosomal protein S3	4	4	1	1	887				653	653	653	34e9a6678acca924fbf24c6bf5608d56_4622	455a00a194b6732c15d9cd1ede6a821e_4668	8aa1aaefd30e370458343f447b9298d5_4637	S_aureus_12_00651
WP_000174050.1		phosphoribosylaminoimidazolesuccinocarboxamide synthase	4	4	1	1	2589				704	704	704	34e9a6678acca924fbf24c6bf5608d56_2004	455a00a194b6732c15d9cd1ede6a821e_2054	8aa1aaefd30e370458343f447b9298d5_2133	S_aureus_12_01630
WP_001279733.1		NADPH-dependent oxidoreductase	4	4	1	1	1221				755	755	755	34e9a6678acca924fbf24c6bf5608d56_700	455a00a194b6732c15d9cd1ede6a821e_742	8aa1aaefd30e370458343f447b9298d5_829	S_aureus_12_00010
WP_000185311.1		glycerophosphodiester phosphodiesterase	4	4	1	1	2039				929	929	929	34e9a6678acca924fbf24c6bf5608d56_1764	455a00a194b6732c15d9cd1ede6a821e_1817	8aa1aaefd30e370458343f447b9298d5_1892	S_aureus_12_01198
WP_000534419.1		amino acid permease	4	4	1	1	529				1448	1448	1448	34e9a6678acca924fbf24c6bf5608d56_5355	455a00a194b6732c15d9cd1ede6a821e_5395	8aa1aaefd30e370458343f447b9298d5_5376	S_aureus_12_00410
dnaK		molecular chaperone DnaK	4	4	1	1	1410				1832	1832	1832	34e9a6678acca924fbf24c6bf5608d56_3224	455a00a194b6732c15d9cd1ede6a821e_3295	8aa1aaefd30e370458343f447b9298d5_3198	S_aureus_12_01112
WP_000790915.1		SAR2788 family putative toxin	4	4	1	1	420				749	749	749	34e9a6678acca924fbf24c6bf5608d56_5571	455a00a194b6732c15d9cd1ede6a821e_5614	8aa1aaefd30e370458343f447b9298d5_5596	S_aureus_12_00512
WP_000051210.1		hypothetical protein	4	4	1	1	871				164	164	164	34e9a6678acca924fbf24c6bf5608d56_4654	455a00a194b6732c15d9cd1ede6a821e_4700	8aa1aaefd30e370458343f447b9298d5_4669	S_aureus_12_00665
WP_000779134.1		DUF3147 family protein	4	4	1	1	416				374	395	389	34e9a6678acca924fbf24c6bf5608d56_5579	455a00a194b6732c15d9cd1ede6a821e_5622	8aa1aaefd30e370458343f447b9298d5_5604	S_aureus_12_00516
WP_000735554.1		hypothetical protein	4	4	1	1	1350				506	506	506	34e9a6678acca924fbf24c6bf5608d56_1195	455a00a194b6732c15d9cd1ede6a821e_1232	8aa1aaefd30e370458343f447b9298d5_1329	S_aureus_12_01471
pckA		phosphoenolpyruvate carboxykinase (ATP)	4	4	1	1	187				1592	1592	1592	34e9a6678acca924fbf24c6bf5608d56_3645	455a00a194b6732c15d9cd1ede6a821e_3725	8aa1aaefd30e370458343f447b9298d5_3614	S_aureus_12_01873
WP_001068528.1		aminotransferase class I/II-fold pyridoxal phosphate-dependent enzyme	4	4	1	1	1117				1286	1286	1286	34e9a6678acca924fbf24c6bf5608d56_4078	455a00a194b6732c15d9cd1ede6a821e_4164	8aa1aaefd30e370458343f447b9298d5_4044	S_aureus_12_02148
yhaM		3'-5' exoribonuclease YhaM	4	4	1	1	3000				941	941	941	34e9a6678acca924fbf24c6bf5608d56_3787	455a00a194b6732c15d9cd1ede6a821e_3876	8aa1aaefd30e370458343f447b9298d5_3756	S_aureus_12_01938
recA		recombinase RecA	4	4	1	1	1760				1043	1043	1043	34e9a6678acca924fbf24c6bf5608d56_2454	455a00a194b6732c15d9cd1ede6a821e_2504	8aa1aaefd30e370458343f447b9298d5_2585	S_aureus_12_01733
WP_000238227.1		exonuclease SbcCD subunit D	4	4	1	1	3002				1196	1196	1196	34e9a6678acca924fbf24c6bf5608d56_3791	455a00a194b6732c15d9cd1ede6a821e_3880	8aa1aaefd30e370458343f447b9298d5_3760	S_aureus_12_01940
rplU		50S ribosomal protein L21	4	4	1	1	256				308	308	308	34e9a6678acca924fbf24c6bf5608d56_3357	455a00a194b6732c15d9cd1ede6a821e_3428	8aa1aaefd30e370458343f447b9298d5_3329	S_aureus_12_01177
WP_001146762.1		carboxymuconolactone decarboxylase family protein	4	4	1	1	648				422	422	422	34e9a6678acca924fbf24c6bf5608d56_5107	455a00a194b6732c15d9cd1ede6a821e_5151	8aa1aaefd30e370458343f447b9298d5_5126	S_aureus_12_00880
WP_001027143.1		hypothetical protein	4	4	1	1	2486				188	188	188	34e9a6678acca924fbf24c6bf5608d56_2560	455a00a194b6732c15d9cd1ede6a821e_2646	8aa1aaefd30e370458343f447b9298d5_2665	S_aureus_12_02426
WP_000184377.1		penicillin-binding protein	4	4	1	1	62				905	905	905	34e9a6678acca924fbf24c6bf5608d56_3523	455a00a194b6732c15d9cd1ede6a821e_3589	8aa1aaefd30e370458343f447b9298d5_3490	S_aureus_12_02071
WP_001183862.1		DUF368 domain-containing protein	4	4	1	1	2273				851	851	851	34e9a6678acca924fbf24c6bf5608d56_1668	455a00a194b6732c15d9cd1ede6a821e_1721	8aa1aaefd30e370458343f447b9298d5_1796	S_aureus_12_01244
WP_000278015.1		MarR family transcriptional regulator	4	4	1	1	2573				419	419	419	34e9a6678acca924fbf24c6bf5608d56_1972	455a00a194b6732c15d9cd1ede6a821e_2022	8aa1aaefd30e370458343f447b9298d5_2101	S_aureus_12_01645
sufD		Fe-S cluster assembly protein SufD	4	4	1	1	2271				1307	1307	1307	34e9a6678acca924fbf24c6bf5608d56_1672	455a00a194b6732c15d9cd1ede6a821e_1725	8aa1aaefd30e370458343f447b9298d5_1800	S_aureus_12_01242
WP_000207849.1		GAF domain-containing protein	4	4	1	1	50				464	464	464	34e9a6678acca924fbf24c6bf5608d56_3499	455a00a194b6732c15d9cd1ede6a821e_3565	8aa1aaefd30e370458343f447b9298d5_3466	S_aureus_12_02082
WP_000908186.1		ABC transporter ATP-binding protein	4	4	1	1	2900				782	782	782	34e9a6678acca924fbf24c6bf5608d56_4415	455a00a194b6732c15d9cd1ede6a821e_4458	8aa1aaefd30e370458343f447b9298d5_4434	S_aureus_12_02044
WP_000063551.1		PTS transporter subunit IIC	4	4	1	1	3015				1061	1061	1061	34e9a6678acca924fbf24c6bf5608d56_3821	455a00a194b6732c15d9cd1ede6a821e_3910	8aa1aaefd30e370458343f447b9298d5_3790	S_aureus_12_01955
WP_000024137.1		heavy metal translocating P-type ATPase	4	4	1	1	571				2408	2408	2408	34e9a6678acca924fbf24c6bf5608d56_5267	455a00a194b6732c15d9cd1ede6a821e_5309	8aa1aaefd30e370458343f447b9298d5_5290	S_aureus_12_00368
WP_000066379.1		bifunctional 3-deoxy-7-phosphoheptulonate synthase/chorismate mutase	4	4	1	1	71				1091	1091	1091	34e9a6678acca924fbf24c6bf5608d56_3541	455a00a194b6732c15d9cd1ede6a821e_3607	8aa1aaefd30e370458343f447b9298d5_3508	S_aureus_12_02063
WP_000215382.1		WecB/TagA/CpsF family glycosyltransferase	4	4	1	1	1128				764	764	764	34e9a6678acca924fbf24c6bf5608d56_1241	455a00a194b6732c15d9cd1ede6a821e_1278	8aa1aaefd30e370458343f447b9298d5_1375	S_aureus_12_01448
pheT		phenylalanine--tRNA ligase subunit beta	4	4	1	1	2447				2402	2402	2402	34e9a6678acca924fbf24c6bf5608d56_2151	455a00a194b6732c15d9cd1ede6a821e_2201	8aa1aaefd30e370458343f447b9298d5_2282	S_aureus_12_02486
QOB71342.1		terminase small subunit	4	4	1	1	2222				569	569	569	34e9a6678acca924fbf24c6bf5608d56_1652	455a00a194b6732c15d9cd1ede6a821e_704	8aa1aaefd30e370458343f447b9298d5_1713	S_aureus_12_01283
WP_000384523.1		DUF1146 family protein	4	4	1	1	2849				233	233	233	34e9a6678acca924fbf24c6bf5608d56_4313	455a00a194b6732c15d9cd1ede6a821e_4354	8aa1aaefd30e370458343f447b9298d5_4332	S_aureus_12_01996
sdaAA		L-serine ammonia-lyase, iron-sulfur-dependent, subunit alpha	4	4	1	1	599				899	899	899	34e9a6678acca924fbf24c6bf5608d56_5211	455a00a194b6732c15d9cd1ede6a821e_5253	8aa1aaefd30e370458343f447b9298d5_5234	S_aureus_12_00342
WP_001037831.1		DUF5011 domain-containing protein	4	4	1	1	2585				317	317	317	34e9a6678acca924fbf24c6bf5608d56_1996	455a00a194b6732c15d9cd1ede6a821e_2046	8aa1aaefd30e370458343f447b9298d5_2125	S_aureus_12_01634
sfaB		staphyloferrin A synthetase SfaB	4	4	1	1	2925				1757	1757	1757	34e9a6678acca924fbf24c6bf5608d56_4494	455a00a194b6732c15d9cd1ede6a821e_4537	8aa1aaefd30e370458343f447b9298d5_4513	S_aureus_12_00593
WP_000240069.1		LLM class flavin-dependent oxidoreductase	4	4	1	1	352				1001	1001	1001	34e9a6678acca924fbf24c6bf5608d56_585	455a00a194b6732c15d9cd1ede6a821e_581	8aa1aaefd30e370458343f447b9298d5_712	S_aureus_12_00067
sucB		dihydrolipoyllysine-residue succinyltransferase	4	4	1	1	1978				1271	1271	1271	34e9a6678acca924fbf24c6bf5608d56_2743	455a00a194b6732c15d9cd1ede6a821e_2828	8aa1aaefd30e370458343f447b9298d5_2847	S_aureus_12_02406
WP_000070654.1		DUF4352 domain-containing protein	4	4	1	1	195				995	995	995	34e9a6678acca924fbf24c6bf5608d56_3661	455a00a194b6732c15d9cd1ede6a821e_3741	8aa1aaefd30e370458343f447b9298d5_3630	S_aureus_12_01881
bioB		biotin synthase BioB	4	4	1	1	698				1007	1007	1007	34e9a6678acca924fbf24c6bf5608d56_5005	455a00a194b6732c15d9cd1ede6a821e_5053	8aa1aaefd30e370458343f447b9298d5_5024	S_aureus_12_00833
saeS		two-component system sensor histidine kinase SaeS	4	4	1	1	2062				1055	1055	1055	34e9a6678acca924fbf24c6bf5608d56_1383	455a00a194b6732c15d9cd1ede6a821e_1486	8aa1aaefd30e370458343f447b9298d5_1517	S_aureus_12_01380
cap8J		type 8 capsular polysaccharide synthesis protein Cap8J	4	4	1	1	1835				557	557	557	34e9a6678acca924fbf24c6bf5608d56_247	455a00a194b6732c15d9cd1ede6a821e_218	8aa1aaefd30e370458343f447b9298d5_382	S_aureus_12_00226
WP_000731878.1		glycine cleavage system protein H	4	4	1	1	351				332	332	332	34e9a6678acca924fbf24c6bf5608d56_587	455a00a194b6732c15d9cd1ede6a821e_583	8aa1aaefd30e370458343f447b9298d5_714	S_aureus_12_00066
WP_001110178.1		hypothetical protein	4	4	1	1	1062				386	386	386	34e9a6678acca924fbf24c6bf5608d56_3968	455a00a194b6732c15d9cd1ede6a821e_4054	8aa1aaefd30e370458343f447b9298d5_3934	S_aureus_12_02197
WP_001140871.1		manganese-dependent inorganic pyrophosphatase	4	4	1	1	1099				929	929	929	34e9a6678acca924fbf24c6bf5608d56_4042	455a00a194b6732c15d9cd1ede6a821e_4128	8aa1aaefd30e370458343f447b9298d5_4008	S_aureus_12_02164
WP_000166911.1		M23 family metallopeptidase	4	4	1	1	1880				578	578	578	34e9a6678acca924fbf24c6bf5608d56_337	455a00a194b6732c15d9cd1ede6a821e_308	8aa1aaefd30e370458343f447b9298d5_472	S_aureus_12_00181
emp		extracellular matrix protein-binding adhesin Emp	4	4	1	1	2367				1025	1025	1025	34e9a6678acca924fbf24c6bf5608d56_1563	455a00a194b6732c15d9cd1ede6a821e_1666	8aa1aaefd30e370458343f447b9298d5_1739	S_aureus_12_01271
WP_001045416.1		alpha/beta hydrolase	4	4	1	1	1348				788	788	788	34e9a6678acca924fbf24c6bf5608d56_1199	455a00a194b6732c15d9cd1ede6a821e_1236	8aa1aaefd30e370458343f447b9298d5_1333	S_aureus_12_01469
WP_000646194.1		zinc-binding dehydrogenase	4	4	1	1	1921				1055	1055	1055	34e9a6678acca924fbf24c6bf5608d56_419	455a00a194b6732c15d9cd1ede6a821e_388	8aa1aaefd30e370458343f447b9298d5_552	S_aureus_12_00145
WP_000719183.1		glycosyltransferase	4	4	1	1	2554				1481	1481	1481	34e9a6678acca924fbf24c6bf5608d56_1938	455a00a194b6732c15d9cd1ede6a821e_1988	8aa1aaefd30e370458343f447b9298d5_2067	S_aureus_12_01662
WP_001010508.1		SUF system NifU family Fe-S cluster assembly protein	4	4	1	1	2269				464	464	464	34e9a6678acca924fbf24c6bf5608d56_1676	455a00a194b6732c15d9cd1ede6a821e_1729	8aa1aaefd30e370458343f447b9298d5_1804	S_aureus_12_01240
WP_001047061.1		LysR family transcriptional regulator	4	4	1	1	1953				869	869	869	34e9a6678acca924fbf24c6bf5608d56_1798	455a00a194b6732c15d9cd1ede6a821e_1851	8aa1aaefd30e370458343f447b9298d5_1926	S_aureus_12_02626
WP_000274040.1		hypothetical protein	4	4	1	1	2267				314	314	314	34e9a6678acca924fbf24c6bf5608d56_1682	455a00a194b6732c15d9cd1ede6a821e_1735	8aa1aaefd30e370458343f447b9298d5_1810	S_aureus_12_01238
WP_001057973.1		ComF family protein	4	4	1	1	2315				674	674	674	34e9a6678acca924fbf24c6bf5608d56_1479	455a00a194b6732c15d9cd1ede6a821e_1582	8aa1aaefd30e370458343f447b9298d5_1611	S_aureus_12_01334
WP_000604727.1		hypothetical protein	4	4	1	1	501				200	200	200	34e9a6678acca924fbf24c6bf5608d56_5415	455a00a194b6732c15d9cd1ede6a821e_5455	8aa1aaefd30e370458343f447b9298d5_5436	S_aureus_12_00433
WP_000384171.1		hypothetical protein	4	4	1	1	174				224	224	224	34e9a6678acca924fbf24c6bf5608d56_3618	455a00a194b6732c15d9cd1ede6a821e_3698	8aa1aaefd30e370458343f447b9298d5_3587	S_aureus_12_01860
WP_000637686.1		hypothetical protein	4	4	1	1	2058				584	584	584	34e9a6678acca924fbf24c6bf5608d56_1391	455a00a194b6732c15d9cd1ede6a821e_1494	8aa1aaefd30e370458343f447b9298d5_1525	S_aureus_12_01376
WP_000435074.1		hypothetical protein	4	4	1	1	2480				197	197	197	34e9a6678acca924fbf24c6bf5608d56_2548	455a00a194b6732c15d9cd1ede6a821e_2634	8aa1aaefd30e370458343f447b9298d5_2653	S_aureus_12_02420
WP_001033875.1		5'-nucleotidase, lipoprotein e(P4) family	4	4	1	1	369				890	890	890	34e9a6678acca924fbf24c6bf5608d56_549	455a00a194b6732c15d9cd1ede6a821e_507	8aa1aaefd30e370458343f447b9298d5_676	S_aureus_12_00084
nsaS		nisin susceptibility-associated two-component system sensor histidine kinase NsaS	4	4	1	1	503				887	887	887	34e9a6678acca924fbf24c6bf5608d56_5411	455a00a194b6732c15d9cd1ede6a821e_5451	8aa1aaefd30e370458343f447b9298d5_5432	S_aureus_12_00431
WP_000323448.1		esterase family protein	4	4	1	1	496				761	761	761	34e9a6678acca924fbf24c6bf5608d56_5423	455a00a194b6732c15d9cd1ede6a821e_5463	8aa1aaefd30e370458343f447b9298d5_5444	S_aureus_12_00437
WP_000623481.1		CrcB family protein	4	4	1	1	183				353	353	353	34e9a6678acca924fbf24c6bf5608d56_3636	455a00a194b6732c15d9cd1ede6a821e_3716	8aa1aaefd30e370458343f447b9298d5_3605	S_aureus_12_01869
WP_000570704.1		alanine:cation symporter family protein	4	4	1	1	386				1568	1568	1568	34e9a6678acca924fbf24c6bf5608d56_1879	455a00a194b6732c15d9cd1ede6a821e_1930	8aa1aaefd30e370458343f447b9298d5_2007	S_aureus_12_01687
WP_000473705.1		isoprenyl transferase	4	4	1	1	1735				770	770	770	34e9a6678acca924fbf24c6bf5608d56_2404	455a00a194b6732c15d9cd1ede6a821e_2454	8aa1aaefd30e370458343f447b9298d5_2535	S_aureus_12_01758
WP_000201397.1		hypothetical protein	4	4	1	1	2773				179	179	179	34e9a6678acca924fbf24c6bf5608d56_4140	455a00a194b6732c15d9cd1ede6a821e_4184	8aa1aaefd30e370458343f447b9298d5_4162	S_aureus_12_02323
WP_000616865.1		ABC transporter ATP-binding protein	4	4	1	1	2299				761	761	761	34e9a6678acca924fbf24c6bf5608d56_1447	455a00a194b6732c15d9cd1ede6a821e_1550	8aa1aaefd30e370458343f447b9298d5_1579	S_aureus_12_01350
fetB		iron export ABC transporter permease subunit FetB	4	4	1	1	668				776	776	776	34e9a6678acca924fbf24c6bf5608d56_5067	455a00a194b6732c15d9cd1ede6a821e_5115	8aa1aaefd30e370458343f447b9298d5_5086	S_aureus_12_00860
dltC		D-alanine--poly(phosphoribitol) ligase subunit 2	4	4	1	1	2251				236	236	236	34e9a6678acca924fbf24c6bf5608d56_1714	455a00a194b6732c15d9cd1ede6a821e_1767	8aa1aaefd30e370458343f447b9298d5_1842	S_aureus_12_01223
WP_000180987.1		ABC transporter permease/substrate-binding protein	4	4	1	1	2285				1514	1514	1514	34e9a6678acca924fbf24c6bf5608d56_1419	455a00a194b6732c15d9cd1ede6a821e_1522	8aa1aaefd30e370458343f447b9298d5_1553	S_aureus_12_01363
WP_000180420.1		hypothetical protein	4	4	1	1	2078				287	287	287	34e9a6678acca924fbf24c6bf5608d56_1351	455a00a194b6732c15d9cd1ede6a821e_1454	8aa1aaefd30e370458343f447b9298d5_1485	S_aureus_12_01396
WP_000669861.1		NETI motif-containing protein	4	4	1	1	1089				173	173	173	34e9a6678acca924fbf24c6bf5608d56_4022	455a00a194b6732c15d9cd1ede6a821e_4108	8aa1aaefd30e370458343f447b9298d5_3988	S_aureus_12_02173
WP_000638453.1		cytochrome d ubiquinol oxidase subunit II	4	4	1	1	2616				1019	1019	1019	34e9a6678acca924fbf24c6bf5608d56_2045	455a00a194b6732c15d9cd1ede6a821e_2095	8aa1aaefd30e370458343f447b9298d5_2176	S_aureus_12_01610
WP_000860607.1		FAD-containing oxidoreductase	4	4	1	1	1329				1322	1322	1322	34e9a6678acca924fbf24c6bf5608d56_1149	455a00a194b6732c15d9cd1ede6a821e_1188	8aa1aaefd30e370458343f447b9298d5_1285	S_aureus_12_01492
WP_001078309.1		PTS lactose/cellobiose transporter subunit IIA	4	4	1	1	2937				311	311	311	34e9a6678acca924fbf24c6bf5608d56_4518	455a00a194b6732c15d9cd1ede6a821e_4561	8aa1aaefd30e370458343f447b9298d5_4537	S_aureus_12_00605
ruvB		Holliday junction branch migration DNA helicase RuvB	4	4	1	1	250				1004	1004	1004	34e9a6678acca924fbf24c6bf5608d56_3345	455a00a194b6732c15d9cd1ede6a821e_3416	8aa1aaefd30e370458343f447b9298d5_3317	S_aureus_12_01171
mnhC2		Na+/H+ antiporter Mnh2 subunit C	4	4	1	1	1340				344	344	344	34e9a6678acca924fbf24c6bf5608d56_1215	455a00a194b6732c15d9cd1ede6a821e_1252	8aa1aaefd30e370458343f447b9298d5_1349	S_aureus_12_01461
fusA		elongation factor G	4	4	1	1	2733				2081	2081	2081	34e9a6678acca924fbf24c6bf5608d56_1057	455a00a194b6732c15d9cd1ede6a821e_1098	8aa1aaefd30e370458343f447b9298d5_1193	S_aureus_12_01538
mobB		molybdopterin-guanine dinucleotide biosynthesis protein B	4	4	1	1	857				485	485	485	34e9a6678acca924fbf24c6bf5608d56_4682	455a00a194b6732c15d9cd1ede6a821e_4728	8aa1aaefd30e370458343f447b9298d5_4697	S_aureus_12_00678
WP_001054111.1		helix-turn-helix domain-containing protein	4	4	1	1	417				569	569	569	34e9a6678acca924fbf24c6bf5608d56_5577	455a00a194b6732c15d9cd1ede6a821e_5620	8aa1aaefd30e370458343f447b9298d5_5602	S_aureus_12_00515
WP_000287208.1		GrpB family protein	4	4	1	1	2303				518	518	518	34e9a6678acca924fbf24c6bf5608d56_1455	455a00a194b6732c15d9cd1ede6a821e_1558	8aa1aaefd30e370458343f447b9298d5_1587	S_aureus_12_01346
cap8K		type 8 capsular polysaccharide synthesis protein Cap8K	4	4	1	1	1836				1238	1238	1238	34e9a6678acca924fbf24c6bf5608d56_249	455a00a194b6732c15d9cd1ede6a821e_220	8aa1aaefd30e370458343f447b9298d5_384	S_aureus_12_00225
WP_000138413.1		toxic anion resistance protein	4	4	1	1	1984				1136	1136	1136	34e9a6678acca924fbf24c6bf5608d56_2731	455a00a194b6732c15d9cd1ede6a821e_2816	8aa1aaefd30e370458343f447b9298d5_2835	S_aureus_12_02400
WP_001058376.1		SprT family protein	4	4	1	1	2810				455	455	455	34e9a6678acca924fbf24c6bf5608d56_4232	455a00a194b6732c15d9cd1ede6a821e_4273	8aa1aaefd30e370458343f447b9298d5_4251	S_aureus_12_01958
WP_000182035.1		hypothetical protein	4	4	1	1	1656				341	341	341	34e9a6678acca924fbf24c6bf5608d56_2824	455a00a194b6732c15d9cd1ede6a821e_2909	8aa1aaefd30e370458343f447b9298d5_2928	S_aureus_12_00914
WP_000788443.1		hypothetical protein	4	4	1	1	879				389	389	389	34e9a6678acca924fbf24c6bf5608d56_4638	455a00a194b6732c15d9cd1ede6a821e_4684	8aa1aaefd30e370458343f447b9298d5_4653	S_aureus_12_00659
rpsP		30S ribosomal protein S16	4	4	1	1	1712				275	275	275	34e9a6678acca924fbf24c6bf5608d56_2356	455a00a194b6732c15d9cd1ede6a821e_2406	8aa1aaefd30e370458343f447b9298d5_2487	S_aureus_12_01780
nrdD		anaerobic ribonucleoside-triphosphate reductase	4	4	1	1	514				1850	1850	1850	34e9a6678acca924fbf24c6bf5608d56_5389	455a00a194b6732c15d9cd1ede6a821e_5429	8aa1aaefd30e370458343f447b9298d5_5410	S_aureus_12_00423
WP_000593835.1		TIGR04197 family type VII secretion effector	4	4	1	1	283				266	266	266	34e9a6678acca924fbf24c6bf5608d56_503	455a00a194b6732c15d9cd1ede6a821e_474	8aa1aaefd30e370458343f447b9298d5_636	S_aureus_12_00105
WP_000691774.1		RidA family protein	4	4	1	1	2683				380	380	380	34e9a6678acca924fbf24c6bf5608d56_902	455a00a194b6732c15d9cd1ede6a821e_948	8aa1aaefd30e370458343f447b9298d5_1033	S_aureus_12_02533
yfhO		lipoteichoic acid-specific glycosyltransferase YfhO	4	4	1	1	1716				2606	2606	2606	34e9a6678acca924fbf24c6bf5608d56_2364	455a00a194b6732c15d9cd1ede6a821e_2414	8aa1aaefd30e370458343f447b9298d5_2495	S_aureus_12_01776
WP_000411298.1		kinase/pyrophosphorylase	4	4	1	1	1427				818	818	818	34e9a6678acca924fbf24c6bf5608d56_3190	455a00a194b6732c15d9cd1ede6a821e_3261	8aa1aaefd30e370458343f447b9298d5_3164	S_aureus_12_01095
folD		bifunctional methylenetetrahydrofolate dehydrogenase/methenyltetrahydrofolate cyclohydrolase FolD	4	4	1	1	2586				860	860	860	34e9a6678acca924fbf24c6bf5608d56_1998	455a00a194b6732c15d9cd1ede6a821e_2048	8aa1aaefd30e370458343f447b9298d5_2127	S_aureus_12_01633
gatB		Asp-tRNA(Asn)/Glu-tRNA(Gln) amidotransferase subunit GatB	4	4	1	1	1077				1427	1427	1427	34e9a6678acca924fbf24c6bf5608d56_3998	455a00a194b6732c15d9cd1ede6a821e_4084	8aa1aaefd30e370458343f447b9298d5_3964	S_aureus_12_02185
WP_000038220.1		DUF1433 domain-containing protein	4	4	1	1	646				419	419	419	34e9a6678acca924fbf24c6bf5608d56_5111	455a00a194b6732c15d9cd1ede6a821e_5155	8aa1aaefd30e370458343f447b9298d5_5130	S_aureus_12_00882
ebpS		elastin-binding protein EbpS	4	4	1	1	1626				1460	1460	1460	34e9a6678acca924fbf24c6bf5608d56_2884	455a00a194b6732c15d9cd1ede6a821e_2969	8aa1aaefd30e370458343f447b9298d5_2988	S_aureus_12_00941
WP_000273254.1		energy-coupling factor transporter transmembrane protein EcfT	4	4	1	1	2598				806	806	806	34e9a6678acca924fbf24c6bf5608d56_2022	455a00a194b6732c15d9cd1ede6a821e_2072	8aa1aaefd30e370458343f447b9298d5_2151	S_aureus_12_01621
WP_000954802.1		FAD-binding oxidoreductase	4	4	1	1	1930				1145	1145	1145	34e9a6678acca924fbf24c6bf5608d56_399	455a00a194b6732c15d9cd1ede6a821e_368	8aa1aaefd30e370458343f447b9298d5_532	S_aureus_12_00153
miaA		tRNA (adenosine(37)-N6)-dimethylallyltransferase MiaA	4	4	1	1	1777				935	935	935	34e9a6678acca924fbf24c6bf5608d56_2488	455a00a194b6732c15d9cd1ede6a821e_2538	8aa1aaefd30e370458343f447b9298d5_2619	S_aureus_12_01716
gcvPB		aminomethyl-transferring glycine dehydrogenase subunit GcvPB	4	4	1	1	1456				1472	1472	1472	34e9a6678acca924fbf24c6bf5608d56_3131	455a00a194b6732c15d9cd1ede6a821e_3202	8aa1aaefd30e370458343f447b9298d5_3105	S_aureus_12_01068
cap8H		type 8 capsular polysaccharide synthesis protein Cap8H	4	4	1	1	1833				1079	1079	1079	34e9a6678acca924fbf24c6bf5608d56_243	455a00a194b6732c15d9cd1ede6a821e_214	8aa1aaefd30e370458343f447b9298d5_378	S_aureus_12_00228
WP_000084835.1		class I SAM-dependent methyltransferase	4	4	1	1	1400				716	716	716	34e9a6678acca924fbf24c6bf5608d56_3244	455a00a194b6732c15d9cd1ede6a821e_3315	8aa1aaefd30e370458343f447b9298d5_3218	S_aureus_12_01122
WP_000733421.1		CAP domain-containing protein	4	4	1	1	2206				1037	1037	1037	34e9a6678acca924fbf24c6bf5608d56_2109	455a00a194b6732c15d9cd1ede6a821e_2159	8aa1aaefd30e370458343f447b9298d5_2240	S_aureus_12_01580
WP_000200680.1		PTS transporter subunit IIC	4	4	1	1	559				1055	1055	1055	34e9a6678acca924fbf24c6bf5608d56_5291	455a00a194b6732c15d9cd1ede6a821e_5333	8aa1aaefd30e370458343f447b9298d5_5314	S_aureus_12_00380
WP_000549234.1		polysaccharide deacetylase family protein	4	4	1	1	443				1124	1124	1124	34e9a6678acca924fbf24c6bf5608d56_5525	455a00a194b6732c15d9cd1ede6a821e_5568	8aa1aaefd30e370458343f447b9298d5_5550	S_aureus_12_00489
ccpA		catabolite control protein A	4	4	1	1	69				989	989	989	34e9a6678acca924fbf24c6bf5608d56_3537	455a00a194b6732c15d9cd1ede6a821e_3603	8aa1aaefd30e370458343f447b9298d5_3504	S_aureus_12_02064
aur		zinc metalloproteinase aureolysin	4	4	1	1	487				1529	1529	1529	34e9a6678acca924fbf24c6bf5608d56_5441	455a00a194b6732c15d9cd1ede6a821e_5481	8aa1aaefd30e370458343f447b9298d5_5462	S_aureus_12_00445
WP_000486505.1		ABC transporter ATP-binding protein/permease	4	4	1	1	695				1733	1733	1733	34e9a6678acca924fbf24c6bf5608d56_5013	455a00a194b6732c15d9cd1ede6a821e_5061	8aa1aaefd30e370458343f447b9298d5_5032	S_aureus_12_00836
adsA		LPXTG-anchored adenosine synthase AdsA	4	4	1	1	2156				2318	2318	2318	34e9a6678acca924fbf24c6bf5608d56_55	455a00a194b6732c15d9cd1ede6a821e_55	8aa1aaefd30e370458343f447b9298d5_55	S_aureus_12_00548
crtQ		4,4'-diaponeurosporenoate glycosyltransferase	4	4	1	1	565				1127	1127	1127	34e9a6678acca924fbf24c6bf5608d56_5279	455a00a194b6732c15d9cd1ede6a821e_5321	8aa1aaefd30e370458343f447b9298d5_5302	S_aureus_12_00374
rpsB		30S ribosomal protein S2	4	4	1	1	1730				767	767	767	34e9a6678acca924fbf24c6bf5608d56_2394	455a00a194b6732c15d9cd1ede6a821e_2444	8aa1aaefd30e370458343f447b9298d5_2525	S_aureus_12_01762
lgt		prolipoprotein diacylglyceryl transferase	4	4	1	1	2327				842	842	842	34e9a6678acca924fbf24c6bf5608d56_1502	455a00a194b6732c15d9cd1ede6a821e_1605	8aa1aaefd30e370458343f447b9298d5_1634	S_aureus_12_01324
WP_001141883.1		NifU family protein	4	4	1	1	2249				242	242	242	34e9a6678acca924fbf24c6bf5608d56_1718	455a00a194b6732c15d9cd1ede6a821e_1771	8aa1aaefd30e370458343f447b9298d5_1846	S_aureus_12_01221
WP_001819714.1		tandem-type lipoprotein	4	4	1	1	2626				788	821	811	34e9a6678acca924fbf24c6bf5608d56_773	455a00a194b6732c15d9cd1ede6a821e_819	8aa1aaefd30e370458343f447b9298d5_904	S_aureus_12_02260
rpsK		30S ribosomal protein S11	4	4	1	1	906				389	389	389	34e9a6678acca924fbf24c6bf5608d56_4584	455a00a194b6732c15d9cd1ede6a821e_4630	8aa1aaefd30e370458343f447b9298d5_4599	S_aureus_12_00632
WP_001118652.1		penicillin-binding protein	4	4	1	1	1372				2234	2234	2234	34e9a6678acca924fbf24c6bf5608d56_2242	455a00a194b6732c15d9cd1ede6a821e_2292	8aa1aaefd30e370458343f447b9298d5_2373	S_aureus_12_02562
glmM		phosphoglucosamine mutase	4	4	1	1	2907				1355	1355	1355	34e9a6678acca924fbf24c6bf5608d56_4429	455a00a194b6732c15d9cd1ede6a821e_4472	8aa1aaefd30e370458343f447b9298d5_4448	S_aureus_12_02052
fabI		enoyl-ACP reductase FabI	4	4	1	1	388				770	770	770	34e9a6678acca924fbf24c6bf5608d56_1875	455a00a194b6732c15d9cd1ede6a821e_1926	8aa1aaefd30e370458343f447b9298d5_2003	S_aureus_12_01689
cntA		staphylopine-dependent metal ABC transporter substrate-binding protein CntA	4	4	1	1	655				1598	1598	1598	34e9a6678acca924fbf24c6bf5608d56_5093	455a00a194b6732c15d9cd1ede6a821e_5137	8aa1aaefd30e370458343f447b9298d5_5112	S_aureus_12_00873
WP_000651847.1		NmrA/HSCARG family protein	4	4	1	1	554				821	821	821	34e9a6678acca924fbf24c6bf5608d56_5303	455a00a194b6732c15d9cd1ede6a821e_5345	8aa1aaefd30e370458343f447b9298d5_5326	S_aureus_12_00385
tgt		tRNA guanosine(34) transglycosylase Tgt	4	4	1	1	248				1139	1139	1139	34e9a6678acca924fbf24c6bf5608d56_3341	455a00a194b6732c15d9cd1ede6a821e_3412	8aa1aaefd30e370458343f447b9298d5_3313	S_aureus_12_01169
WP_000448078.1		glutathione peroxidase	4	4	1	1	1779				476	476	476	34e9a6678acca924fbf24c6bf5608d56_2492	455a00a194b6732c15d9cd1ede6a821e_2542	8aa1aaefd30e370458343f447b9298d5_2623	S_aureus_12_01714
WP_001094394.1		F0F1 ATP synthase subunit epsilon	4	4	1	1	2850				404	404	404	34e9a6678acca924fbf24c6bf5608d56_4315	455a00a194b6732c15d9cd1ede6a821e_4356	8aa1aaefd30e370458343f447b9298d5_4336	S_aureus_12_01997
WP_000825937.1		transporter substrate-binding domain-containing protein	4	4	1	1	711				779	779	779	34e9a6678acca924fbf24c6bf5608d56_4979	455a00a194b6732c15d9cd1ede6a821e_5027	8aa1aaefd30e370458343f447b9298d5_4998	S_aureus_12_00821
WP_000813536.1		alpha-keto acid decarboxylase family protein	4	4	1	1	1864				1640	1640	1640	34e9a6678acca924fbf24c6bf5608d56_305	455a00a194b6732c15d9cd1ede6a821e_276	8aa1aaefd30e370458343f447b9298d5_440	S_aureus_12_00197
WP_000018608.1		cell division protein SepF	4	4	1	1	1380				563	563	563	34e9a6678acca924fbf24c6bf5608d56_2258	455a00a194b6732c15d9cd1ede6a821e_2308	8aa1aaefd30e370458343f447b9298d5_2389	S_aureus_12_02554
WP_000361536.1		CCA tRNA nucleotidyltransferase	4	4	1	1	1650				1202	1202	1202	34e9a6678acca924fbf24c6bf5608d56_2836	455a00a194b6732c15d9cd1ede6a821e_2921	8aa1aaefd30e370458343f447b9298d5_2940	S_aureus_12_00920
WP_000491975.1		GNAT family N-acetyltransferase	4	4	1	1	2576				434	434	434	34e9a6678acca924fbf24c6bf5608d56_1978	455a00a194b6732c15d9cd1ede6a821e_2028	8aa1aaefd30e370458343f447b9298d5_2107	S_aureus_12_01643
WP_001040736.1		GNAT family N-acetyltransferase	4	4	1	1	2877				860	860	860	34e9a6678acca924fbf24c6bf5608d56_4369	455a00a194b6732c15d9cd1ede6a821e_4410	8aa1aaefd30e370458343f447b9298d5_4390	S_aureus_12_02024
WP_000593364.1		Cof-type HAD-IIB family hydrolase	4	4	1	1	2721				869	869	869	34e9a6678acca924fbf24c6bf5608d56_1081	455a00a194b6732c15d9cd1ede6a821e_1122	8aa1aaefd30e370458343f447b9298d5_1217	S_aureus_12_01526
WP_000072447.1		CPBP family intramembrane metalloprotease	4	4	1	1	661				749	749	749	34e9a6678acca924fbf24c6bf5608d56_5081	455a00a194b6732c15d9cd1ede6a821e_5125	8aa1aaefd30e370458343f447b9298d5_5100	S_aureus_12_00867
WP_000434765.1		phosphotransferase family protein	4	4	1	1	149				791	791	791	34e9a6678acca924fbf24c6bf5608d56_3567	455a00a194b6732c15d9cd1ede6a821e_3645	8aa1aaefd30e370458343f447b9298d5_3536	S_aureus_12_01835
WP_000498572.1		threonine/serine exporter family protein	4	4	1	1	1320				452	452	452	34e9a6678acca924fbf24c6bf5608d56_1131	455a00a194b6732c15d9cd1ede6a821e_1170	8aa1aaefd30e370458343f447b9298d5_1267	S_aureus_12_01501
WP_001213908.1		metal ABC transporter ATP-binding protein	4	4	1	1	1434				785	785	785	34e9a6678acca924fbf24c6bf5608d56_3176	455a00a194b6732c15d9cd1ede6a821e_3247	8aa1aaefd30e370458343f447b9298d5_3150	S_aureus_12_01088
QOB71461.1		ABC transporter permease	4	4	1	1	1308				590	962	713	34e9a6678acca924fbf24c6bf5608d56_1838	455a00a194b6732c15d9cd1ede6a821e_1891	8aa1aaefd30e370458343f447b9298d5_1966	S_aureus_12_02135
WP_000148855.1		glucose-6-phosphate isomerase	4	4	1	1	2042				1331	1331	1331	34e9a6678acca924fbf24c6bf5608d56_1770	455a00a194b6732c15d9cd1ede6a821e_1823	8aa1aaefd30e370458343f447b9298d5_1898	S_aureus_12_01195
WP_000831695.1		CamS family sex pheromone protein	4	4	1	1	1081				1199	1199	1199	34e9a6678acca924fbf24c6bf5608d56_4006	455a00a194b6732c15d9cd1ede6a821e_4092	8aa1aaefd30e370458343f447b9298d5_3972	S_aureus_12_02181
greA		transcription elongation factor GreA	4	4	1	1	219				476	476	476	34e9a6678acca924fbf24c6bf5608d56_3280	455a00a194b6732c15d9cd1ede6a821e_3351	8aa1aaefd30e370458343f447b9298d5_3252	S_aureus_12_01141
rapZ		RNase adapter RapZ	4	4	1	1	2331				911	911	911	34e9a6678acca924fbf24c6bf5608d56_1510	455a00a194b6732c15d9cd1ede6a821e_1613	8aa1aaefd30e370458343f447b9298d5_1642	S_aureus_12_01319
pfkB		1-phosphofructokinase	4	4	1	1	2068				920	920	920	34e9a6678acca924fbf24c6bf5608d56_1371	455a00a194b6732c15d9cd1ede6a821e_1474	8aa1aaefd30e370458343f447b9298d5_1505	S_aureus_12_01386
WP_000724887.1		EMYY motif lipoprotein	4	4	1	1	2304				878	878	878	34e9a6678acca924fbf24c6bf5608d56_1457	455a00a194b6732c15d9cd1ede6a821e_1560	8aa1aaefd30e370458343f447b9298d5_1589	S_aureus_12_01345
tsaB		tRNA (adenosine(37)-N6)-threonylcarbamoyltransferase complex dimerization subunit type 1 TsaB	4	4	1	1	2797				662	662	662	34e9a6678acca924fbf24c6bf5608d56_4188	455a00a194b6732c15d9cd1ede6a821e_4232	8aa1aaefd30e370458343f447b9298d5_4210	S_aureus_12_02346
WP_000162661.1		sugar ABC transporter permease	4	4	1	1	1884				839	839	839	34e9a6678acca924fbf24c6bf5608d56_345	455a00a194b6732c15d9cd1ede6a821e_316	8aa1aaefd30e370458343f447b9298d5_480	S_aureus_12_00177
mcrC		5-methylcytosine-specific restriction endonuclease system specificity protein McrC	4	4	1	1	1302				1040	1040	1040	34e9a6678acca924fbf24c6bf5608d56_101	455a00a194b6732c15d9cd1ede6a821e_72	8aa1aaefd30e370458343f447b9298d5_238	S_aureus_12_00297
tagG		teichoic acids export ABC transporter permease subunit TagG	4	4	1	1	1130				812	812	812	34e9a6678acca924fbf24c6bf5608d56_1245	455a00a194b6732c15d9cd1ede6a821e_1282	8aa1aaefd30e370458343f447b9298d5_1379	S_aureus_12_01446
femB		glycine glycyltransferase FemB	4	4	1	1	2013				1259	1259	1259	34e9a6678acca924fbf24c6bf5608d56_2670	455a00a194b6732c15d9cd1ede6a821e_2756	8aa1aaefd30e370458343f447b9298d5_2775	S_aureus_12_02371
pmtC		phenol-soluble modulin export ABC transporter ATP-binding protein PmtC	4	4	1	1	1111				872	872	872	34e9a6678acca924fbf24c6bf5608d56_4066	455a00a194b6732c15d9cd1ede6a821e_4152	8aa1aaefd30e370458343f447b9298d5_4032	S_aureus_12_02153
WP_001573690.1		hypothetical protein	4	4	1	1	631				308	308	308	34e9a6678acca924fbf24c6bf5608d56_5143	455a00a194b6732c15d9cd1ede6a821e_5187	8aa1aaefd30e370458343f447b9298d5_5164	S_aureus_12_00311
gltX		glutamate--tRNA ligase	4	4	1	1	2753				1454	1454	1454	34e9a6678acca924fbf24c6bf5608d56_1016	455a00a194b6732c15d9cd1ede6a821e_1057	8aa1aaefd30e370458343f447b9298d5_1152	S_aureus_12_01557
WP_001031977.1		polyisoprenyl-teichoic acid--peptidoglycan teichoic acid transferase	4	4	1	1	2578				1226	1226	1226	34e9a6678acca924fbf24c6bf5608d56_1982	455a00a194b6732c15d9cd1ede6a821e_2032	8aa1aaefd30e370458343f447b9298d5_2111	S_aureus_12_01641
WP_000769795.1		YbhB/YbcL family Raf kinase inhibitor-like protein	4	4	1	1	1957				515	515	515	34e9a6678acca924fbf24c6bf5608d56_1806	455a00a194b6732c15d9cd1ede6a821e_1859	8aa1aaefd30e370458343f447b9298d5_1934	S_aureus_12_02622
rarD		EamA family transporter RarD	4	4	1	1	430				908	908	908	34e9a6678acca924fbf24c6bf5608d56_5551	455a00a194b6732c15d9cd1ede6a821e_5594	8aa1aaefd30e370458343f447b9298d5_5576	S_aureus_12_00502
nsaR		nisin susceptibility-associated two-component system response regulator NsaR	4	4	1	1	502				665	665	665	34e9a6678acca924fbf24c6bf5608d56_5413	455a00a194b6732c15d9cd1ede6a821e_5453	8aa1aaefd30e370458343f447b9298d5_5434	S_aureus_12_00432
rplD		50S ribosomal protein L4	4	4	1	1	882				623	623	623	34e9a6678acca924fbf24c6bf5608d56_4632	455a00a194b6732c15d9cd1ede6a821e_4678	8aa1aaefd30e370458343f447b9298d5_4647	S_aureus_12_00656
vraF		ABC transporter ATP-binding protein VraF	4	4	1	1	1153				761	761	761	34e9a6678acca924fbf24c6bf5608d56_1291	455a00a194b6732c15d9cd1ede6a821e_1328	8aa1aaefd30e370458343f447b9298d5_1425	S_aureus_12_01424
WP_000582582.1		CvpA family protein	4	4	1	1	2450				521	521	521	34e9a6678acca924fbf24c6bf5608d56_2157	455a00a194b6732c15d9cd1ede6a821e_2207	8aa1aaefd30e370458343f447b9298d5_2288	S_aureus_12_02483
WP_000711870.1		BCCT family transporter	4	4	1	1	517				1622	1622	1622	34e9a6678acca924fbf24c6bf5608d56_5381	455a00a194b6732c15d9cd1ede6a821e_5421	8aa1aaefd30e370458343f447b9298d5_5402	S_aureus_12_00421
glpT		glycerol-3-phosphate transporter	4	4	1	1	339				1358	1358	1358	34e9a6678acca924fbf24c6bf5608d56_611	455a00a194b6732c15d9cd1ede6a821e_607	8aa1aaefd30e370458343f447b9298d5_738	S_aureus_12_00054
WP_000874681.1		superoxide dismutase	4	4	1	1	1258				599	599	599	34e9a6678acca924fbf24c6bf5608d56_195	455a00a194b6732c15d9cd1ede6a821e_166	8aa1aaefd30e370458343f447b9298d5_332	S_aureus_12_00251
WP_000075713.1		heme-dependent peroxidase	4	4	1	1	1322				752	752	752	34e9a6678acca924fbf24c6bf5608d56_1135	455a00a194b6732c15d9cd1ede6a821e_1174	8aa1aaefd30e370458343f447b9298d5_1271	S_aureus_12_01499
WP_000924211.1		deoxyribonuclease IV	4	4	1	1	1433				890	890	890	34e9a6678acca924fbf24c6bf5608d56_3178	455a00a194b6732c15d9cd1ede6a821e_3249	8aa1aaefd30e370458343f447b9298d5_3152	S_aureus_12_01089
WP_001240323.1		inositol monophosphatase family protein	4	4	1	1	2195				827	827	827	34e9a6678acca924fbf24c6bf5608d56_2087	455a00a194b6732c15d9cd1ede6a821e_2137	8aa1aaefd30e370458343f447b9298d5_2218	S_aureus_12_01590
rpsL		30S ribosomal protein S12	4	4	1	1	2735				413	413	413	34e9a6678acca924fbf24c6bf5608d56_1053	455a00a194b6732c15d9cd1ede6a821e_1094	8aa1aaefd30e370458343f447b9298d5_1189	S_aureus_12_01540
rplW		50S ribosomal protein L23	4	4	1	1	883				275	275	275	34e9a6678acca924fbf24c6bf5608d56_4630	455a00a194b6732c15d9cd1ede6a821e_4676	8aa1aaefd30e370458343f447b9298d5_4645	S_aureus_12_00655
WP_000757543.1		MarR family transcriptional regulator	4	4	1	1	162				401	401	401	34e9a6678acca924fbf24c6bf5608d56_3593	455a00a194b6732c15d9cd1ede6a821e_3671	8aa1aaefd30e370458343f447b9298d5_3562	S_aureus_12_01849
WP_001108339.1		bifunctional folylpolyglutamate synthase/dihydrofolate synthase	4	4	1	1	265				1271	1271	1271	34e9a6678acca924fbf24c6bf5608d56_3380	455a00a194b6732c15d9cd1ede6a821e_3447	8aa1aaefd30e370458343f447b9298d5_3348	S_aureus_12_01184
WP_000344352.1		urease accessory protein UreD	4	4	1	1	836				836	836	836	34e9a6678acca924fbf24c6bf5608d56_4724	455a00a194b6732c15d9cd1ede6a821e_4770	8aa1aaefd30e370458343f447b9298d5_4741	S_aureus_12_00699
WP_001165363.1		YerC/YecD family TrpR-related protein	4	4	1	1	1085				302	302	302	34e9a6678acca924fbf24c6bf5608d56_4014	455a00a194b6732c15d9cd1ede6a821e_4100	8aa1aaefd30e370458343f447b9298d5_3980	S_aureus_12_02177
WP_000228670.1		low molecular weight phosphotyrosine protein phosphatase	4	4	1	1	1056				464	464	464	34e9a6678acca924fbf24c6bf5608d56_3956	455a00a194b6732c15d9cd1ede6a821e_4042	8aa1aaefd30e370458343f447b9298d5_3922	S_aureus_12_02203
ytxJ		bacillithiol system redox-active protein YtxJ	4	4	1	1	2305				320	320	320	34e9a6678acca924fbf24c6bf5608d56_1459	455a00a194b6732c15d9cd1ede6a821e_1562	8aa1aaefd30e370458343f447b9298d5_1591	S_aureus_12_01344
WP_000590515.1		ABC transporter ATP-binding protein	4	4	1	1	659				749	749	749	34e9a6678acca924fbf24c6bf5608d56_5085	455a00a194b6732c15d9cd1ede6a821e_5129	8aa1aaefd30e370458343f447b9298d5_5104	S_aureus_12_00869
WP_001067041.1		ABC transporter ATP-binding protein	4	4	1	1	1310				986	986	986	34e9a6678acca924fbf24c6bf5608d56_1834	455a00a194b6732c15d9cd1ede6a821e_1887	8aa1aaefd30e370458343f447b9298d5_1962	S_aureus_12_02137
WP_000251252.1		DUF402 domain-containing protein	4	4	1	1	1042				542	542	542	34e9a6678acca924fbf24c6bf5608d56_3928	455a00a194b6732c15d9cd1ede6a821e_4014	8aa1aaefd30e370458343f447b9298d5_3894	S_aureus_12_02217
WP_000466746.1		GlsB/YeaQ/YmgE family stress response membrane protein	4	4	1	1	1213				254	254	254	34e9a6678acca924fbf24c6bf5608d56_684	455a00a194b6732c15d9cd1ede6a821e_726	8aa1aaefd30e370458343f447b9298d5_813	S_aureus_12_00017
WP_000046606.1		UDP-N-acetylglucosamine 1-carboxyvinyltransferase	4	4	1	1	2872				1259	1259	1259	34e9a6678acca924fbf24c6bf5608d56_4359	455a00a194b6732c15d9cd1ede6a821e_4400	8aa1aaefd30e370458343f447b9298d5_4380	S_aureus_12_02019
gpsB		cell division regulator GpsB	4	4	1	1	1661				344	344	344	34e9a6678acca924fbf24c6bf5608d56_2814	455a00a194b6732c15d9cd1ede6a821e_2899	8aa1aaefd30e370458343f447b9298d5_2918	S_aureus_12_00909
pxpA		5-oxoprolinase subunit PxpA	4	4	1	1	214				752	752	752	34e9a6678acca924fbf24c6bf5608d56_3270	455a00a194b6732c15d9cd1ede6a821e_3341	8aa1aaefd30e370458343f447b9298d5_3242	S_aureus_12_01136
WP_000159577.1		rRNA pseudouridine synthase	4	4	1	1	1500				737	737	737	34e9a6678acca924fbf24c6bf5608d56_3041	455a00a194b6732c15d9cd1ede6a821e_3112	8aa1aaefd30e370458343f447b9298d5_3017	S_aureus_12_01024
WP_000548698.1		ABC transporter permease	4	4	1	1	788				1232	1232	1232	34e9a6678acca924fbf24c6bf5608d56_4821	455a00a194b6732c15d9cd1ede6a821e_4867	8aa1aaefd30e370458343f447b9298d5_4838	S_aureus_12_00745
mepR		multidrug efflux transporter transcriptional repressor MepR	4	4	1	1	342				419	419	419	34e9a6678acca924fbf24c6bf5608d56_605	455a00a194b6732c15d9cd1ede6a821e_601	8aa1aaefd30e370458343f447b9298d5_732	S_aureus_12_00057
eno		phosphopyruvate hydratase	4	4	1	1	2343				1304	1304	1304	34e9a6678acca924fbf24c6bf5608d56_1534	455a00a194b6732c15d9cd1ede6a821e_1637	8aa1aaefd30e370458343f447b9298d5_1666	S_aureus_12_01306
WP_000375864.1		helix-turn-helix transcriptional regulator	4	4	1	1	3005				464	464	464	34e9a6678acca924fbf24c6bf5608d56_3797	455a00a194b6732c15d9cd1ede6a821e_3886	8aa1aaefd30e370458343f447b9298d5_3766	S_aureus_12_01943
WP_000651159.1		alanine:cation symporter family protein	4	4	1	1	2521				1460	1460	1460	34e9a6678acca924fbf24c6bf5608d56_2630	455a00a194b6732c15d9cd1ede6a821e_2716	8aa1aaefd30e370458343f447b9298d5_2735	S_aureus_12_02458
vraD		peptide resistance ABC transporter ATP-binding subunit VraD	4	4	1	1	425				758	758	758	34e9a6678acca924fbf24c6bf5608d56_5561	455a00a194b6732c15d9cd1ede6a821e_5604	8aa1aaefd30e370458343f447b9298d5_5586	S_aureus_12_00507
WP_000400028.1		alpha/beta hydrolase	4	4	1	1	611				593	593	593	34e9a6678acca924fbf24c6bf5608d56_5185	455a00a194b6732c15d9cd1ede6a821e_5227	8aa1aaefd30e370458343f447b9298d5_5208	S_aureus_12_00331
gyrA		DNA gyrase subunit A	4	4	1	1	2139				2660	2660	2660	34e9a6678acca924fbf24c6bf5608d56_13	455a00a194b6732c15d9cd1ede6a821e_13	8aa1aaefd30e370458343f447b9298d5_13	S_aureus_12_00529
WP_000382892.1		ATP-binding cassette domain-containing protein	4	4	1	1	615				695	695	695	34e9a6678acca924fbf24c6bf5608d56_5177	455a00a194b6732c15d9cd1ede6a821e_5219	8aa1aaefd30e370458343f447b9298d5_5200	S_aureus_12_00327
cysK		cysteine synthase A	4	4	1	1	2700				932	932	932	34e9a6678acca924fbf24c6bf5608d56_936	455a00a194b6732c15d9cd1ede6a821e_982	8aa1aaefd30e370458343f447b9298d5_1067	S_aureus_12_02517
efeB		iron uptake transporter deferrochelatase/peroxidase subunit	4	4	1	1	331				1229	1229	1229	34e9a6678acca924fbf24c6bf5608d56_625	455a00a194b6732c15d9cd1ede6a821e_621	8aa1aaefd30e370458343f447b9298d5_752	S_aureus_12_00046
WP_001182437.1		Cof-type HAD-IIB family hydrolase	4	4	1	1	1949				824	824	824	34e9a6678acca924fbf24c6bf5608d56_1790	455a00a194b6732c15d9cd1ede6a821e_1843	8aa1aaefd30e370458343f447b9298d5_1918	S_aureus_12_02630
plsX		phosphate acyltransferase PlsX	4	4	1	1	1703				986	986	986	34e9a6678acca924fbf24c6bf5608d56_2338	455a00a194b6732c15d9cd1ede6a821e_2388	8aa1aaefd30e370458343f447b9298d5_2469	S_aureus_12_01789
group_2256	brnQ	branched-chain amino acid transport system II carrier protein	4	4	1	1	370				1307	1307	1307	34e9a6678acca924fbf24c6bf5608d56_547	455a00a194b6732c15d9cd1ede6a821e_505	8aa1aaefd30e370458343f447b9298d5_674	S_aureus_12_00085
blaI		penicillinase repressor BlaI	4	4	1	1	118				380	380	380	34e9a6678acca924fbf24c6bf5608d56_5614	455a00a194b6732c15d9cd1ede6a821e_3637	8aa1aaefd30e370458343f447b9298d5_127	S_aureus_12_02648
WP_000932696.1		single-stranded DNA-binding protein	4	4	1	1	2845				395	395	395	34e9a6678acca924fbf24c6bf5608d56_4305	455a00a194b6732c15d9cd1ede6a821e_4346	8aa1aaefd30e370458343f447b9298d5_4324	S_aureus_12_01992
WP_000752917.1		CsbD family protein	4	4	1	1	2432				194	194	194	34e9a6678acca924fbf24c6bf5608d56_1666	455a00a194b6732c15d9cd1ede6a821e_1719	8aa1aaefd30e370458343f447b9298d5_1794	S_aureus_12_01245
WP_000704122.1		Rrf2 family transcriptional regulator	4	4	1	1	235				422	422	422	34e9a6678acca924fbf24c6bf5608d56_3312	455a00a194b6732c15d9cd1ede6a821e_3383	8aa1aaefd30e370458343f447b9298d5_3284	S_aureus_12_01157
pyrF		orotidine-5'-phosphate decarboxylase	4	4	1	1	1812				692	692	692	34e9a6678acca924fbf24c6bf5608d56_2288	455a00a194b6732c15d9cd1ede6a821e_2338	8aa1aaefd30e370458343f447b9298d5_2419	S_aureus_12_01814
hemL		glutamate-1-semialdehyde 2,1-aminomutase	4	4	1	1	275				1286	1286	1286	34e9a6678acca924fbf24c6bf5608d56_3391	455a00a194b6732c15d9cd1ede6a821e_3458	8aa1aaefd30e370458343f447b9298d5_3359	S_aureus_12_02131
WP_001052483.1		hypothetical protein	4	4	1	1	311				191	191	191	34e9a6678acca924fbf24c6bf5608d56_666	455a00a194b6732c15d9cd1ede6a821e_662	8aa1aaefd30e370458343f447b9298d5_793	S_aureus_12_00026
WP_000833480.1		cupin domain-containing protein	4	4	1	1	1162				473	473	473	34e9a6678acca924fbf24c6bf5608d56_1309	455a00a194b6732c15d9cd1ede6a821e_1346	8aa1aaefd30e370458343f447b9298d5_1443	S_aureus_12_01415
WP_000469883.1		undecaprenyl-diphosphate phosphatase	4	4	1	1	2084				875	875	875	34e9a6678acca924fbf24c6bf5608d56_1339	455a00a194b6732c15d9cd1ede6a821e_1442	8aa1aaefd30e370458343f447b9298d5_1473	S_aureus_12_01402
group_2266	lpdA	dihydrolipoyl dehydrogenase	4	4	1	1	2606				1406	1406	1406	34e9a6678acca924fbf24c6bf5608d56_2065	455a00a194b6732c15d9cd1ede6a821e_2115	8aa1aaefd30e370458343f447b9298d5_2196	S_aureus_12_01601
WP_000696073.1		ABC transporter permease	4	4	1	1	761				1082	1082	1082	34e9a6678acca924fbf24c6bf5608d56_4877	455a00a194b6732c15d9cd1ede6a821e_4923	8aa1aaefd30e370458343f447b9298d5_4896	S_aureus_12_00772
WP_001287082.1		hypothetical protein	4	4	1	1	2822				479	479	479	34e9a6678acca924fbf24c6bf5608d56_4256	455a00a194b6732c15d9cd1ede6a821e_4297	8aa1aaefd30e370458343f447b9298d5_4275	S_aureus_12_01970
WP_000737686.1		hypothetical protein	4	4	1	1	1460				581	581	581	34e9a6678acca924fbf24c6bf5608d56_3123	455a00a194b6732c15d9cd1ede6a821e_3194	8aa1aaefd30e370458343f447b9298d5_3097	S_aureus_12_01064
WP_001793753.1		hypothetical protein	4	4	1	1	1216				254	386	351	34e9a6678acca924fbf24c6bf5608d56_690	455a00a194b6732c15d9cd1ede6a821e_732	8aa1aaefd30e370458343f447b9298d5_819	S_aureus_12_00015
WP_000940129.1		GNAT family N-acetyltransferase	4	4	1	1	1149				506	506	506	34e9a6678acca924fbf24c6bf5608d56_1283	455a00a194b6732c15d9cd1ede6a821e_1320	8aa1aaefd30e370458343f447b9298d5_1417	S_aureus_12_01428
WP_000735197.1		cyclic lactone autoinducer peptide	4	4	1	1	2782				140	140	140	34e9a6678acca924fbf24c6bf5608d56_4158	455a00a194b6732c15d9cd1ede6a821e_4202	8aa1aaefd30e370458343f447b9298d5_4180	S_aureus_12_02332
rny		ribonuclease Y	4	4	1	1	1761				1559	1559	1559	34e9a6678acca924fbf24c6bf5608d56_2456	455a00a194b6732c15d9cd1ede6a821e_2506	8aa1aaefd30e370458343f447b9298d5_2587	S_aureus_12_01732
purH		bifunctional phosphoribosylaminoimidazolecarboxamide formyltransferase/IMP cyclohydrolase	4	4	1	1	2596				1478	1478	1478	34e9a6678acca924fbf24c6bf5608d56_2018	455a00a194b6732c15d9cd1ede6a821e_2068	8aa1aaefd30e370458343f447b9298d5_2147	S_aureus_12_01623
WP_001165967.1		carboxylesterase	4	4	1	1	2346				740	740	740	34e9a6678acca924fbf24c6bf5608d56_1540	455a00a194b6732c15d9cd1ede6a821e_1643	8aa1aaefd30e370458343f447b9298d5_1672	S_aureus_12_01303
WP_000118301.1		DNA translocase FtsK	4	4	1	1	76				3824	3824	3824	34e9a6678acca924fbf24c6bf5608d56_3551	455a00a194b6732c15d9cd1ede6a821e_3617	8aa1aaefd30e370458343f447b9298d5_3520	S_aureus_12_01827
WP_000775162.1		assimilatory sulfite reductase (NADPH) flavoprotein subunit	4	4	1	1	510				1880	1880	1880	34e9a6678acca924fbf24c6bf5608d56_5397	455a00a194b6732c15d9cd1ede6a821e_5437	8aa1aaefd30e370458343f447b9298d5_5418	S_aureus_12_00426
WP_000161364.1		D-lactate dehydrogenase	4	4	1	1	569				998	998	998	34e9a6678acca924fbf24c6bf5608d56_5271	455a00a194b6732c15d9cd1ede6a821e_5313	8aa1aaefd30e370458343f447b9298d5_5294	S_aureus_12_00370
WP_000084775.1		phosphatase PAP2 family protein	4	4	1	1	1973				614	614	614	34e9a6678acca924fbf24c6bf5608d56_2755	455a00a194b6732c15d9cd1ede6a821e_2840	8aa1aaefd30e370458343f447b9298d5_2859	S_aureus_12_02411
WP_001185679.1		sodium:proton antiporter	4	4	1	1	684				2078	2078	2078	34e9a6678acca924fbf24c6bf5608d56_5035	455a00a194b6732c15d9cd1ede6a821e_5083	8aa1aaefd30e370458343f447b9298d5_5054	S_aureus_12_00846
WP_000829637.1		ABC transporter permease	4	4	1	1	1964				1070	1070	1070	34e9a6678acca924fbf24c6bf5608d56_1820	455a00a194b6732c15d9cd1ede6a821e_1873	8aa1aaefd30e370458343f447b9298d5_1948	S_aureus_12_02615
hxlA		3-hexulose-6-phosphate synthase	4	4	1	1	2711				632	632	632	34e9a6678acca924fbf24c6bf5608d56_1103	455a00a194b6732c15d9cd1ede6a821e_1142	8aa1aaefd30e370458343f447b9298d5_1239	S_aureus_12_01515
asnS		asparagine--tRNA ligase	4	4	1	1	1653				1292	1292	1292	34e9a6678acca924fbf24c6bf5608d56_2830	455a00a194b6732c15d9cd1ede6a821e_2915	8aa1aaefd30e370458343f447b9298d5_2934	S_aureus_12_00917
WP_000616227.1		VOC family protein	4	4	1	1	555				377	377	377	34e9a6678acca924fbf24c6bf5608d56_5301	455a00a194b6732c15d9cd1ede6a821e_5343	8aa1aaefd30e370458343f447b9298d5_5324	S_aureus_12_00384
WP_001276571.1		rhodanese-like domain-containing protein	4	4	1	1	1457				386	386	386	34e9a6678acca924fbf24c6bf5608d56_3129	455a00a194b6732c15d9cd1ede6a821e_3200	8aa1aaefd30e370458343f447b9298d5_3103	S_aureus_12_01067
WP_000160430.1		CBS domain-containing protein	4	4	1	1	36				1298	1298	1298	34e9a6678acca924fbf24c6bf5608d56_3469	455a00a194b6732c15d9cd1ede6a821e_3535	8aa1aaefd30e370458343f447b9298d5_3436	S_aureus_12_02095
purL		phosphoribosylformylglycinamidine synthase subunit PurL	4	4	1	1	2592				2189	2189	2189	34e9a6678acca924fbf24c6bf5608d56_2010	455a00a194b6732c15d9cd1ede6a821e_2060	8aa1aaefd30e370458343f447b9298d5_2139	S_aureus_12_01627
WP_001062173.1		DEAD/DEAH box helicase	4	4	1	1	1432				1346	1346	1346	34e9a6678acca924fbf24c6bf5608d56_3180	455a00a194b6732c15d9cd1ede6a821e_3251	8aa1aaefd30e370458343f447b9298d5_3154	S_aureus_12_01090
WP_001049150.1		YlbG family protein	4	4	1	1	2209				254	254	254	34e9a6678acca924fbf24c6bf5608d56_2115	455a00a194b6732c15d9cd1ede6a821e_2165	8aa1aaefd30e370458343f447b9298d5_2246	S_aureus_12_01577
fabZ		3-hydroxyacyl-ACP dehydratase FabZ	4	4	1	1	2847				440	440	440	34e9a6678acca924fbf24c6bf5608d56_4309	455a00a194b6732c15d9cd1ede6a821e_4350	8aa1aaefd30e370458343f447b9298d5_4328	S_aureus_12_01994
WP_001140696.1		phosphoglycerate mutase family protein	4	4	1	1	2378				560	584	576	34e9a6678acca924fbf24c6bf5608d56_1585	455a00a194b6732c15d9cd1ede6a821e_1688	8aa1aaefd30e370458343f447b9298d5_1761	S_aureus_12_01260
WP_000356975.1		LCP family protein	4	4	1	1	2527				983	983	983	34e9a6678acca924fbf24c6bf5608d56_2642	455a00a194b6732c15d9cd1ede6a821e_2728	8aa1aaefd30e370458343f447b9298d5_2747	S_aureus_12_02463
esaB		type VII secretion protein EsaB	4	4	1	1	280				242	242	242	34e9a6678acca924fbf24c6bf5608d56_497	455a00a194b6732c15d9cd1ede6a821e_468	8aa1aaefd30e370458343f447b9298d5_630	S_aureus_12_00108
WP_000366165.1		NERD domain-containing protein	4	4	1	1	185				908	908	908	34e9a6678acca924fbf24c6bf5608d56_3640	455a00a194b6732c15d9cd1ede6a821e_3720	8aa1aaefd30e370458343f447b9298d5_3609	S_aureus_12_01871
WP_000565312.1		tyrosine-protein phosphatase	4	4	1	1	461				767	767	767	34e9a6678acca924fbf24c6bf5608d56_5491	455a00a194b6732c15d9cd1ede6a821e_5534	8aa1aaefd30e370458343f447b9298d5_5514	S_aureus_12_00471
WP_000865619.1		DUF402 domain-containing protein	4	4	1	1	1164				644	644	644	34e9a6678acca924fbf24c6bf5608d56_1313	455a00a194b6732c15d9cd1ede6a821e_1350	8aa1aaefd30e370458343f447b9298d5_1447	S_aureus_12_01414
rplS		50S ribosomal protein L19	4	4	1	1	1715				350	350	350	34e9a6678acca924fbf24c6bf5608d56_2362	455a00a194b6732c15d9cd1ede6a821e_2412	8aa1aaefd30e370458343f447b9298d5_2493	S_aureus_12_01777
rplN		50S ribosomal protein L14	4	4	1	1	891				368	368	368	34e9a6678acca924fbf24c6bf5608d56_4614	455a00a194b6732c15d9cd1ede6a821e_4660	8aa1aaefd30e370458343f447b9298d5_4629	S_aureus_12_00647
WP_000370339.1		sce7726 family protein	4	4	1	1	1873				863	863	863	34e9a6678acca924fbf24c6bf5608d56_323	455a00a194b6732c15d9cd1ede6a821e_294	8aa1aaefd30e370458343f447b9298d5_458	S_aureus_12_00188
WP_000365236.1		NUDIX hydrolase	4	4	1	1	1494				542	542	542	34e9a6678acca924fbf24c6bf5608d56_3053	455a00a194b6732c15d9cd1ede6a821e_3124	8aa1aaefd30e370458343f447b9298d5_3029	S_aureus_12_01030
WP_000985287.1		peptide deformylase	4	4	1	1	1689				488	488	488	34e9a6678acca924fbf24c6bf5608d56_2310	455a00a194b6732c15d9cd1ede6a821e_2360	8aa1aaefd30e370458343f447b9298d5_2441	S_aureus_12_01803
WP_223200472.1		isochorismate synthase MenF	4	4	1	1	2562				1211	1361	1304	34e9a6678acca924fbf24c6bf5608d56_1954	455a00a194b6732c15d9cd1ede6a821e_2004	8aa1aaefd30e370458343f447b9298d5_2083	S_aureus_12_01655
group_230	ald	alanine dehydrogenase	4	4	1	1	41				1118	1166	1133	34e9a6678acca924fbf24c6bf5608d56_3479	455a00a194b6732c15d9cd1ede6a821e_3545	8aa1aaefd30e370458343f447b9298d5_3446	S_aureus_12_02091
WP_000531477.1		PTS sugar transporter subunit IIA	4	4	1	1	1924				467	467	467	34e9a6678acca924fbf24c6bf5608d56_413	455a00a194b6732c15d9cd1ede6a821e_382	8aa1aaefd30e370458343f447b9298d5_546	S_aureus_12_00148
WP_000872486.1		D-ribitol-5-phosphate cytidylyltransferase	4	4	1	1	1914				716	716	716	34e9a6678acca924fbf24c6bf5608d56_433	455a00a194b6732c15d9cd1ede6a821e_402	8aa1aaefd30e370458343f447b9298d5_566	S_aureus_12_00138
WP_000699538.1		PTS sugar transporter subunit IIB	4	4	1	1	345				284	284	284	34e9a6678acca924fbf24c6bf5608d56_599	455a00a194b6732c15d9cd1ede6a821e_595	8aa1aaefd30e370458343f447b9298d5_726	S_aureus_12_00060
purQ		phosphoribosylformylglycinamidine synthase I	4	4	1	1	2591				671	671	671	34e9a6678acca924fbf24c6bf5608d56_2008	455a00a194b6732c15d9cd1ede6a821e_2058	8aa1aaefd30e370458343f447b9298d5_2137	S_aureus_12_01628
WP_000868413.1		phosphatidate cytidylyltransferase	4	4	1	1	1736				782	782	782	34e9a6678acca924fbf24c6bf5608d56_2406	455a00a194b6732c15d9cd1ede6a821e_2456	8aa1aaefd30e370458343f447b9298d5_2537	S_aureus_12_01757
WP_001018871.1		MTH1187 family thiamine-binding protein	4	4	1	1	1444				329	329	329	34e9a6678acca924fbf24c6bf5608d56_3156	455a00a194b6732c15d9cd1ede6a821e_3227	8aa1aaefd30e370458343f447b9298d5_3130	S_aureus_12_01079
leuB		3-isopropylmalate dehydrogenase	4	4	1	1	2805				1046	1046	1046	34e9a6678acca924fbf24c6bf5608d56_4204	455a00a194b6732c15d9cd1ede6a821e_4248	8aa1aaefd30e370458343f447b9298d5_4226	S_aureus_12_02353
WP_000989088.1		iron chelate uptake ABC transporter family permease subunit	4	4	1	1	2920				968	968	968	34e9a6678acca924fbf24c6bf5608d56_4484	455a00a194b6732c15d9cd1ede6a821e_4527	8aa1aaefd30e370458343f447b9298d5_4503	S_aureus_12_00589
nusG		transcription termination/antitermination protein NusG	4	4	1	1	2744				548	548	548	34e9a6678acca924fbf24c6bf5608d56_1034	455a00a194b6732c15d9cd1ede6a821e_1075	8aa1aaefd30e370458343f447b9298d5_1170	S_aureus_12_01549
hssR		DNA-binding heme response regulator HssR	4	4	1	1	767				674	674	674	34e9a6678acca924fbf24c6bf5608d56_4865	455a00a194b6732c15d9cd1ede6a821e_4911	8aa1aaefd30e370458343f447b9298d5_4884	S_aureus_12_00766
dinB		DNA polymerase IV	4	4	1	1	1072				1070	1070	1070	34e9a6678acca924fbf24c6bf5608d56_3988	455a00a194b6732c15d9cd1ede6a821e_4074	8aa1aaefd30e370458343f447b9298d5_3954	S_aureus_12_02189
WP_000545928.1		urease subunit gamma	4	4	1	1	842				302	302	302	34e9a6678acca924fbf24c6bf5608d56_4712	455a00a194b6732c15d9cd1ede6a821e_4758	8aa1aaefd30e370458343f447b9298d5_4729	S_aureus_12_00693
WP_000184409.1		MFS transporter	4	4	1	1	864				1211	1211	1211	34e9a6678acca924fbf24c6bf5608d56_4668	455a00a194b6732c15d9cd1ede6a821e_4714	8aa1aaefd30e370458343f447b9298d5_4683	S_aureus_12_00672
mecA		adaptor protein MecA	4	4	1	1	400				719	719	719	34e9a6678acca924fbf24c6bf5608d56_1851	455a00a194b6732c15d9cd1ede6a821e_1902	8aa1aaefd30e370458343f447b9298d5_1979	S_aureus_12_01701
clpX		ATP-dependent Clp protease ATP-binding subunit ClpX	4	4	1	1	5				1262	1262	1262	34e9a6678acca924fbf24c6bf5608d56_3405	455a00a194b6732c15d9cd1ede6a821e_3472	8aa1aaefd30e370458343f447b9298d5_3373	S_aureus_12_02124
obgE		GTPase ObgE	4	4	1	1	253				1292	1292	1292	34e9a6678acca924fbf24c6bf5608d56_3351	455a00a194b6732c15d9cd1ede6a821e_3422	8aa1aaefd30e370458343f447b9298d5_3323	S_aureus_12_01174
WP_000290401.1		aldehyde dehydrogenase family protein	4	4	1	1	1844				1487	1487	1487	34e9a6678acca924fbf24c6bf5608d56_265	455a00a194b6732c15d9cd1ede6a821e_236	8aa1aaefd30e370458343f447b9298d5_400	S_aureus_12_00217
deoD		purine-nucleoside phosphorylase	4	4	1	1	1255				707	707	707	34e9a6678acca924fbf24c6bf5608d56_203	455a00a194b6732c15d9cd1ede6a821e_174	8aa1aaefd30e370458343f447b9298d5_338	S_aureus_12_00248
WP_001164085.1		hypothetical protein	4	4	1	1	1145				497	497	497	34e9a6678acca924fbf24c6bf5608d56_1275	455a00a194b6732c15d9cd1ede6a821e_1312	8aa1aaefd30e370458343f447b9298d5_1409	S_aureus_12_01432
mnhB1		Na+/H+ antiporter Mnh1 subunit B	4	4	1	1	2234				428	428	428	34e9a6678acca924fbf24c6bf5608d56_1748	455a00a194b6732c15d9cd1ede6a821e_1801	8aa1aaefd30e370458343f447b9298d5_1876	S_aureus_12_01206
sdhA		succinate dehydrogenase flavoprotein subunit	4	4	1	1	2457				1766	1766	1766	34e9a6678acca924fbf24c6bf5608d56_2171	455a00a194b6732c15d9cd1ede6a821e_2221	8aa1aaefd30e370458343f447b9298d5_2302	S_aureus_12_02477
WP_000640483.1		acyl-CoA thioesterase	4	4	1	1	2516				467	467	467	34e9a6678acca924fbf24c6bf5608d56_2620	455a00a194b6732c15d9cd1ede6a821e_2706	8aa1aaefd30e370458343f447b9298d5_2725	S_aureus_12_02453
sdhB		succinate dehydrogenase iron-sulfur subunit	4	4	1	1	2458				815	815	815	34e9a6678acca924fbf24c6bf5608d56_2173	455a00a194b6732c15d9cd1ede6a821e_2223	8aa1aaefd30e370458343f447b9298d5_2304	S_aureus_12_02476
WP_000422908.1		nitroreductase	4	4	1	1	2383				539	539	539	34e9a6678acca924fbf24c6bf5608d56_1595	455a00a194b6732c15d9cd1ede6a821e_1698	8aa1aaefd30e370458343f447b9298d5_1771	S_aureus_12_01255
gndA		NADP-dependent phosphogluconate dehydrogenase	4	4	1	1	1480				1406	1406	1406	34e9a6678acca924fbf24c6bf5608d56_3083	455a00a194b6732c15d9cd1ede6a821e_3154	8aa1aaefd30e370458343f447b9298d5_3057	S_aureus_12_01044
lepA		translation elongation factor 4	4	4	1	1	1406				1823	1823	1823	34e9a6678acca924fbf24c6bf5608d56_3232	455a00a194b6732c15d9cd1ede6a821e_3303	8aa1aaefd30e370458343f447b9298d5_3206	S_aureus_12_01116
WP_000888494.1		protein-serine/threonine phosphatase Stp1	4	4	1	1	1693				743	743	743	34e9a6678acca924fbf24c6bf5608d56_2318	455a00a194b6732c15d9cd1ede6a821e_2368	8aa1aaefd30e370458343f447b9298d5_2449	S_aureus_12_01799
era		GTPase Era	4	4	1	1	1423				899	899	899	34e9a6678acca924fbf24c6bf5608d56_3198	455a00a194b6732c15d9cd1ede6a821e_3269	8aa1aaefd30e370458343f447b9298d5_3172	S_aureus_12_01099
group_2328	argF	ornithine carbamoyltransferase	4	4	1	1	491				1010	1010	1010	34e9a6678acca924fbf24c6bf5608d56_5433	455a00a194b6732c15d9cd1ede6a821e_5473	8aa1aaefd30e370458343f447b9298d5_5454	S_aureus_12_00442
guaA		glutamine-hydrolyzing GMP synthase	4	4	1	1	1230				1541	1541	1541	34e9a6678acca924fbf24c6bf5608d56_719	455a00a194b6732c15d9cd1ede6a821e_761	8aa1aaefd30e370458343f447b9298d5_848	S_aureus_12_00002
trmB		tRNA (guanosine(46)-N7)-methyltransferase TrmB	4	4	1	1	148				644	644	644	34e9a6678acca924fbf24c6bf5608d56_3565	455a00a194b6732c15d9cd1ede6a821e_3643	8aa1aaefd30e370458343f447b9298d5_3534	S_aureus_12_01834
WP_001047251.1		Rrf2 family transcriptional regulator	4	4	1	1	1330				440	440	440	34e9a6678acca924fbf24c6bf5608d56_1151	455a00a194b6732c15d9cd1ede6a821e_1190	8aa1aaefd30e370458343f447b9298d5_1287	S_aureus_12_01491
WP_000193750.1		peptide MFS transporter	4	4	1	1	2290				1505	1505	1505	34e9a6678acca924fbf24c6bf5608d56_1429	455a00a194b6732c15d9cd1ede6a821e_1532	8aa1aaefd30e370458343f447b9298d5_1563	S_aureus_12_01358
WP_000370181.1		Mini-ribonuclease 3	4	4	1	1	2750				404	404	404	34e9a6678acca924fbf24c6bf5608d56_1022	455a00a194b6732c15d9cd1ede6a821e_1063	8aa1aaefd30e370458343f447b9298d5_1158	S_aureus_12_01554
WP_000604508.1		aminodeoxychorismate/anthranilate synthase component II	4	4	1	1	2054				593	593	593	34e9a6678acca924fbf24c6bf5608d56_1399	455a00a194b6732c15d9cd1ede6a821e_1502	8aa1aaefd30e370458343f447b9298d5_1533	S_aureus_12_01372
WP_001217118.1		rRNA pseudouridine synthase	4	4	1	1	153				695	695	695	34e9a6678acca924fbf24c6bf5608d56_3575	455a00a194b6732c15d9cd1ede6a821e_3653	8aa1aaefd30e370458343f447b9298d5_3544	S_aureus_12_01839
WP_000611456.1		UDP-N-acetylmuramoyl-tripeptide--D-alanyl-D-alanine ligase	4	4	1	1	2830				1358	1358	1358	34e9a6678acca924fbf24c6bf5608d56_4272	455a00a194b6732c15d9cd1ede6a821e_4313	8aa1aaefd30e370458343f447b9298d5_4291	S_aureus_12_01977
WP_001024028.1		hypothetical protein	4	4	1	1	2883				350	350	350	34e9a6678acca924fbf24c6bf5608d56_4381	455a00a194b6732c15d9cd1ede6a821e_4422	8aa1aaefd30e370458343f447b9298d5_4402	S_aureus_12_02030
WP_000536961.1		ABC transporter permease	4	4	1	1	614				770	770	770	34e9a6678acca924fbf24c6bf5608d56_5179	455a00a194b6732c15d9cd1ede6a821e_5221	8aa1aaefd30e370458343f447b9298d5_5202	S_aureus_12_00328
WP_000669380.1		RluA family pseudouridine synthase	4	4	1	1	3008				821	821	821	34e9a6678acca924fbf24c6bf5608d56_3803	455a00a194b6732c15d9cd1ede6a821e_3892	8aa1aaefd30e370458343f447b9298d5_3772	S_aureus_12_01946
pxpB		5-oxoprolinase subunit PxpB	4	4	1	1	218				734	734	734	34e9a6678acca924fbf24c6bf5608d56_3278	455a00a194b6732c15d9cd1ede6a821e_3349	8aa1aaefd30e370458343f447b9298d5_3250	S_aureus_12_01140
purB		adenylosuccinate lyase	4	4	1	1	1086				1295	1295	1295	34e9a6678acca924fbf24c6bf5608d56_4016	455a00a194b6732c15d9cd1ede6a821e_4102	8aa1aaefd30e370458343f447b9298d5_3982	S_aureus_12_02176
esxA		WXG100 family type VII secretion effector EsxA	4	4	1	1	2189				293	293	293	34e9a6678acca924fbf24c6bf5608d56_491	455a00a194b6732c15d9cd1ede6a821e_460	8aa1aaefd30e370458343f447b9298d5_624	S_aureus_12_00111
rpsE		30S ribosomal protein S5	4	4	1	1	898				500	500	500	34e9a6678acca924fbf24c6bf5608d56_4600	455a00a194b6732c15d9cd1ede6a821e_4646	8aa1aaefd30e370458343f447b9298d5_4615	S_aureus_12_00640
WP_001237527.1		MFS transporter	4	4	1	1	2914				1343	1343	1343	34e9a6678acca924fbf24c6bf5608d56_4472	455a00a194b6732c15d9cd1ede6a821e_4515	8aa1aaefd30e370458343f447b9298d5_4491	S_aureus_12_00583
WP_000161837.1		SDR family NAD(P)-dependent oxidoreductase	4	4	1	1	551				704	704	704	34e9a6678acca924fbf24c6bf5608d56_5309	455a00a194b6732c15d9cd1ede6a821e_5351	8aa1aaefd30e370458343f447b9298d5_5332	S_aureus_12_00388
WP_000902107.1		ATP-dependent DNA helicase RecQ	4	4	1	1	1625				1379	1379	1379	34e9a6678acca924fbf24c6bf5608d56_2886	455a00a194b6732c15d9cd1ede6a821e_2971	8aa1aaefd30e370458343f447b9298d5_2990	S_aureus_12_00942
WP_001237003.1		YbaN family protein	4	4	1	1	1843				383	383	383	34e9a6678acca924fbf24c6bf5608d56_263	455a00a194b6732c15d9cd1ede6a821e_234	8aa1aaefd30e370458343f447b9298d5_398	S_aureus_12_00218
treC		alpha,alpha-phosphotrehalase	4	4	1	1	2660				1640	1640	1640	34e9a6678acca924fbf24c6bf5608d56_842	455a00a194b6732c15d9cd1ede6a821e_888	8aa1aaefd30e370458343f447b9298d5_973	S_aureus_12_02230
WP_000101538.1		amino acid permease	4	4	1	1	685				1409	1409	1409	34e9a6678acca924fbf24c6bf5608d56_5033	455a00a194b6732c15d9cd1ede6a821e_5081	8aa1aaefd30e370458343f447b9298d5_5052	S_aureus_12_00845
WP_000157348.1		DUF951 domain-containing protein	4	4	1	1	313				203	203	203	34e9a6678acca924fbf24c6bf5608d56_662	455a00a194b6732c15d9cd1ede6a821e_658	8aa1aaefd30e370458343f447b9298d5_789	S_aureus_12_00028
WP_000717800.1		N-acetylmuramoyl-L-alanine amidase	4	4	1	1	241				875	875	875	34e9a6678acca924fbf24c6bf5608d56_3327	455a00a194b6732c15d9cd1ede6a821e_3398	8aa1aaefd30e370458343f447b9298d5_3299	S_aureus_12_01162
WP_000301935.1		peptide-methionine (S)-S-oxide reductase	4	4	1	1	463				476	476	476	34e9a6678acca924fbf24c6bf5608d56_5487	455a00a194b6732c15d9cd1ede6a821e_5530	8aa1aaefd30e370458343f447b9298d5_5510	S_aureus_12_00469
pflA		pyruvate formate lyase-activating protein	4	4	1	1	1946				755	755	755	34e9a6678acca924fbf24c6bf5608d56_367	455a00a194b6732c15d9cd1ede6a821e_336	8aa1aaefd30e370458343f447b9298d5_500	S_aureus_12_00167
WP_000547905.1		thiamine diphosphokinase	4	4	1	1	1697				641	641	641	34e9a6678acca924fbf24c6bf5608d56_2326	455a00a194b6732c15d9cd1ede6a821e_2376	8aa1aaefd30e370458343f447b9298d5_2457	S_aureus_12_01795
WP_001124494.1		CoA-disulfide reductase	4	4	1	1	1168				1316	1316	1316	34e9a6678acca924fbf24c6bf5608d56_1788	455a00a194b6732c15d9cd1ede6a821e_1841	8aa1aaefd30e370458343f447b9298d5_1916	S_aureus_12_02631
WP_000091444.1		hypothetical protein	4	4	1	1	181				302	302	302	34e9a6678acca924fbf24c6bf5608d56_3632	455a00a194b6732c15d9cd1ede6a821e_3712	8aa1aaefd30e370458343f447b9298d5_3601	S_aureus_12_01867
WP_000600387.1		YjcG family protein	4	4	1	1	2532				509	509	509	34e9a6678acca924fbf24c6bf5608d56_1887	455a00a194b6732c15d9cd1ede6a821e_1938	8aa1aaefd30e370458343f447b9298d5_2015	S_aureus_12_01683
WP_000589549.1		arsenate reductase family protein	4	4	1	1	2385				356	356	356	34e9a6678acca924fbf24c6bf5608d56_1599	455a00a194b6732c15d9cd1ede6a821e_1702	8aa1aaefd30e370458343f447b9298d5_1775	S_aureus_12_01253
WP_000810619.1		DUF5325 family protein	4	4	1	1	2196				191	191	191	34e9a6678acca924fbf24c6bf5608d56_2089	455a00a194b6732c15d9cd1ede6a821e_2139	8aa1aaefd30e370458343f447b9298d5_2220	S_aureus_12_01589
WP_000538141.1		HD domain-containing protein	4	4	1	1	2322				650	650	650	34e9a6678acca924fbf24c6bf5608d56_1492	455a00a194b6732c15d9cd1ede6a821e_1595	8aa1aaefd30e370458343f447b9298d5_1624	S_aureus_12_01329
WP_001231458.1		diacylglycerol kinase	4	4	1	1	1075				947	947	947	34e9a6678acca924fbf24c6bf5608d56_3994	455a00a194b6732c15d9cd1ede6a821e_4080	8aa1aaefd30e370458343f447b9298d5_3960	S_aureus_12_02186
WP_000569649.1		DNA-directed RNA polymerase subunit alpha	4	4	1	1	907				944	944	944	34e9a6678acca924fbf24c6bf5608d56_4582	455a00a194b6732c15d9cd1ede6a821e_4628	8aa1aaefd30e370458343f447b9298d5_4597	S_aureus_12_00631
WP_000240663.1		thioredoxin family protein	4	4	1	1	593				356	356	356	34e9a6678acca924fbf24c6bf5608d56_5223	455a00a194b6732c15d9cd1ede6a821e_5265	8aa1aaefd30e370458343f447b9298d5_5246	S_aureus_12_00348
yihA		ribosome biogenesis GTP-binding protein YihA/YsxC	4	4	1	1	4				590	590	590	34e9a6678acca924fbf24c6bf5608d56_3403	455a00a194b6732c15d9cd1ede6a821e_3470	8aa1aaefd30e370458343f447b9298d5_3371	S_aureus_12_02125
WP_001163755.1		NAD(P)-binding domain-containing protein	4	4	1	1	546				1106	1106	1106	34e9a6678acca924fbf24c6bf5608d56_5319	455a00a194b6732c15d9cd1ede6a821e_5361	8aa1aaefd30e370458343f447b9298d5_5342	S_aureus_12_00393
atpA		F0F1 ATP synthase subunit alpha	4	4	1	1	2853				1508	1508	1508	34e9a6678acca924fbf24c6bf5608d56_4321	455a00a194b6732c15d9cd1ede6a821e_4362	8aa1aaefd30e370458343f447b9298d5_4342	S_aureus_12_02000
WP_000727537.1		DUF3139 domain-containing protein	4	4	1	1	740				365	365	365	34e9a6678acca924fbf24c6bf5608d56_4919	455a00a194b6732c15d9cd1ede6a821e_4967	8aa1aaefd30e370458343f447b9298d5_4938	S_aureus_12_00792
WP_001185421.1		MoxR family ATPase	4	4	1	1	1981				791	791	791	34e9a6678acca924fbf24c6bf5608d56_2737	455a00a194b6732c15d9cd1ede6a821e_2822	8aa1aaefd30e370458343f447b9298d5_2841	S_aureus_12_02403
WP_000414485.1		TetR/AcrR family transcriptional regulator	4	4	1	1	1295				575	575	575	34e9a6678acca924fbf24c6bf5608d56_117	455a00a194b6732c15d9cd1ede6a821e_88	8aa1aaefd30e370458343f447b9298d5_254	S_aureus_12_00289
WP_000278303.1		MepB family protein	4	4	1	1	340				440	440	440	34e9a6678acca924fbf24c6bf5608d56_609	455a00a194b6732c15d9cd1ede6a821e_605	8aa1aaefd30e370458343f447b9298d5_736	S_aureus_12_00055
WP_000606724.1		hypothetical protein	4	4	1	1	815				329	329	329	34e9a6678acca924fbf24c6bf5608d56_4766	455a00a194b6732c15d9cd1ede6a821e_4812	8aa1aaefd30e370458343f447b9298d5_4783	S_aureus_12_00719
ndk		nucleoside-diphosphate kinase	4	4	1	1	1640				449	449	449	34e9a6678acca924fbf24c6bf5608d56_2856	455a00a194b6732c15d9cd1ede6a821e_2941	8aa1aaefd30e370458343f447b9298d5_2960	S_aureus_12_00930
WP_000469932.1		ABC transporter permease	4	4	1	1	2008				986	986	986	34e9a6678acca924fbf24c6bf5608d56_2682	455a00a194b6732c15d9cd1ede6a821e_2768	8aa1aaefd30e370458343f447b9298d5_2787	S_aureus_12_02377
WP_000230358.1		hypothetical protein	4	4	1	1	1920				146	146	146	34e9a6678acca924fbf24c6bf5608d56_421	455a00a194b6732c15d9cd1ede6a821e_390	8aa1aaefd30e370458343f447b9298d5_554	S_aureus_12_00144
WP_001191011.1		hydroxymethylglutaryl-CoA reductase, degradative	4	4	1	1	584				1280	1280	1280	34e9a6678acca924fbf24c6bf5608d56_5241	455a00a194b6732c15d9cd1ede6a821e_5283	8aa1aaefd30e370458343f447b9298d5_5264	S_aureus_12_00357
gltS		sodium/glutamate symporter	4	4	1	1	784				1208	1208	1208	34e9a6678acca924fbf24c6bf5608d56_4829	455a00a194b6732c15d9cd1ede6a821e_4875	8aa1aaefd30e370458343f447b9298d5_4846	S_aureus_12_00749
WP_000145163.1		sterile alpha motif-like domain-containing protein	4	4	1	1	2376				203	203	203	34e9a6678acca924fbf24c6bf5608d56_1581	455a00a194b6732c15d9cd1ede6a821e_1684	8aa1aaefd30e370458343f447b9298d5_1757	S_aureus_12_01262
clpB		ATP-dependent chaperone ClpB	4	4	1	1	1952				2609	2609	2609	34e9a6678acca924fbf24c6bf5608d56_1796	455a00a194b6732c15d9cd1ede6a821e_1849	8aa1aaefd30e370458343f447b9298d5_1924	S_aureus_12_02627
WP_000921246.1		hypothetical protein	4	4	1	1	822				233	233	233	34e9a6678acca924fbf24c6bf5608d56_4752	455a00a194b6732c15d9cd1ede6a821e_4798	8aa1aaefd30e370458343f447b9298d5_4769	S_aureus_12_00712
WP_000030061.1		aspartate aminotransferase family protein	4	4	1	1	528				1337	1337	1337	34e9a6678acca924fbf24c6bf5608d56_5357	455a00a194b6732c15d9cd1ede6a821e_5397	8aa1aaefd30e370458343f447b9298d5_5378	S_aureus_12_00411
WP_000638469.1		2-C-methyl-D-erythritol 4-phosphate cytidylyltransferase	4	4	1	1	1918				716	716	716	34e9a6678acca924fbf24c6bf5608d56_425	455a00a194b6732c15d9cd1ede6a821e_394	8aa1aaefd30e370458343f447b9298d5_558	S_aureus_12_00142
WP_000285452.1		HAD family hydrolase	4	4	1	1	809				635	635	635	34e9a6678acca924fbf24c6bf5608d56_4778	455a00a194b6732c15d9cd1ede6a821e_4824	8aa1aaefd30e370458343f447b9298d5_4795	S_aureus_12_00725
WP_000931237.1		aldo/keto reductase	4	4	1	1	2064				839	839	839	34e9a6678acca924fbf24c6bf5608d56_1379	455a00a194b6732c15d9cd1ede6a821e_1482	8aa1aaefd30e370458343f447b9298d5_1513	S_aureus_12_01382
sfaD		D-ornithine--citrate ligase SfaD	4	4	1	1	2927				1976	1976	1976	34e9a6678acca924fbf24c6bf5608d56_4498	455a00a194b6732c15d9cd1ede6a821e_4541	8aa1aaefd30e370458343f447b9298d5_4517	S_aureus_12_00595
WP_000160442.1		NAD(P)/FAD-dependent oxidoreductase	4	4	1	1	564				1493	1493	1493	34e9a6678acca924fbf24c6bf5608d56_5281	455a00a194b6732c15d9cd1ede6a821e_5323	8aa1aaefd30e370458343f447b9298d5_5304	S_aureus_12_00375
WP_001224174.1		superantigen-like protein SSL12	4	4	1	1	2037				716	716	716	34e9a6678acca924fbf24c6bf5608d56_2207	455a00a194b6732c15d9cd1ede6a821e_2257	8aa1aaefd30e370458343f447b9298d5_2338	S_aureus_12_02579
gyrB		DNA topoisomerase (ATP-hydrolyzing) subunit B	4	4	1	1	2138				1934	1934	1934	34e9a6678acca924fbf24c6bf5608d56_11	455a00a194b6732c15d9cd1ede6a821e_11	8aa1aaefd30e370458343f447b9298d5_11	S_aureus_12_00528
menD		2-succinyl-5-enolpyruvyl-6-hydroxy-3-cyclohexene-1-carboxylic-acid synthase	4	4	1	1	2563				1673	1673	1673	34e9a6678acca924fbf24c6bf5608d56_1956	455a00a194b6732c15d9cd1ede6a821e_2006	8aa1aaefd30e370458343f447b9298d5_2085	S_aureus_12_01654
moaD		molybdopterin converting factor subunit 1	4	4	1	1	859				233	233	233	34e9a6678acca924fbf24c6bf5608d56_4678	455a00a194b6732c15d9cd1ede6a821e_4724	8aa1aaefd30e370458343f447b9298d5_4693	S_aureus_12_00676
hlgB		bi-component gamma-hemolysin HlgAB/HlgCB subunit B	4	4	1	1	702				977	977	977	34e9a6678acca924fbf24c6bf5608d56_4997	455a00a194b6732c15d9cd1ede6a821e_5045	8aa1aaefd30e370458343f447b9298d5_5016	S_aureus_12_00829
WP_001062991.1		GTP-binding protein	4	4	1	1	2632				1202	1202	1202	34e9a6678acca924fbf24c6bf5608d56_783	455a00a194b6732c15d9cd1ede6a821e_829	8aa1aaefd30e370458343f447b9298d5_914	S_aureus_12_02254
ribB		3,4-dihydroxy-2-butanone-4-phosphate synthase	4	4	1	1	167				1181	1181	1181	34e9a6678acca924fbf24c6bf5608d56_3603	455a00a194b6732c15d9cd1ede6a821e_3683	8aa1aaefd30e370458343f447b9298d5_3572	S_aureus_12_01853
WP_000634175.1		universal stress protein	4	4	1	1	42				500	500	500	34e9a6678acca924fbf24c6bf5608d56_3481	455a00a194b6732c15d9cd1ede6a821e_3547	8aa1aaefd30e370458343f447b9298d5_3448	S_aureus_12_02090
msaC		sarA expression modulator MsaC	4	4	1	1	1989				401	401	401	34e9a6678acca924fbf24c6bf5608d56_2721	455a00a194b6732c15d9cd1ede6a821e_2806	8aa1aaefd30e370458343f447b9298d5_2825	S_aureus_12_02395
WP_000454783.1		HAD family hydrolase	4	4	1	1	2725				683	683	683	34e9a6678acca924fbf24c6bf5608d56_1073	455a00a194b6732c15d9cd1ede6a821e_1114	8aa1aaefd30e370458343f447b9298d5_1209	S_aureus_12_01530
accC		acetyl-CoA carboxylase biotin carboxylase subunit	4	4	1	1	1464				1355	1355	1355	34e9a6678acca924fbf24c6bf5608d56_3115	455a00a194b6732c15d9cd1ede6a821e_3186	8aa1aaefd30e370458343f447b9298d5_3089	S_aureus_12_01060
WP_001151462.1		FMN-dependent NADH-azoreductase	4	4	1	1	1879				626	626	626	34e9a6678acca924fbf24c6bf5608d56_335	455a00a194b6732c15d9cd1ede6a821e_306	8aa1aaefd30e370458343f447b9298d5_470	S_aureus_12_00182
WP_000435380.1		RNA methyltransferase	4	4	1	1	2445				740	740	740	34e9a6678acca924fbf24c6bf5608d56_2147	455a00a194b6732c15d9cd1ede6a821e_2197	8aa1aaefd30e370458343f447b9298d5_2278	S_aureus_12_02488
sarR		HTH-type transcriptional regulator SarR	4	4	1	1	835				347	347	347	34e9a6678acca924fbf24c6bf5608d56_4726	455a00a194b6732c15d9cd1ede6a821e_4772	8aa1aaefd30e370458343f447b9298d5_4743	S_aureus_12_00700
WP_001198024.1		TM2 domain-containing protein	4	4	1	1	1802				203	302	246	34e9a6678acca924fbf24c6bf5608d56_2308	455a00a194b6732c15d9cd1ede6a821e_2358	8aa1aaefd30e370458343f447b9298d5_2439	S_aureus_12_01804
WP_000136022.1		alpha/beta hydrolase	4	4	1	1	355				827	827	827	34e9a6678acca924fbf24c6bf5608d56_579	455a00a194b6732c15d9cd1ede6a821e_575	8aa1aaefd30e370458343f447b9298d5_706	S_aureus_12_00069
menC		o-succinylbenzoate synthase	4	4	1	1	191				1001	1001	1001	34e9a6678acca924fbf24c6bf5608d56_3653	455a00a194b6732c15d9cd1ede6a821e_3733	8aa1aaefd30e370458343f447b9298d5_3622	S_aureus_12_01877
xerC		tyrosine recombinase XerC	4	4	1	1	1725				896	896	896	34e9a6678acca924fbf24c6bf5608d56_2384	455a00a194b6732c15d9cd1ede6a821e_2434	8aa1aaefd30e370458343f447b9298d5_2515	S_aureus_12_01766
efp		elongation factor P	4	4	1	1	1462				557	557	557	34e9a6678acca924fbf24c6bf5608d56_3119	455a00a194b6732c15d9cd1ede6a821e_3190	8aa1aaefd30e370458343f447b9298d5_3093	S_aureus_12_01062
WP_001125210.1		2,3-diphosphoglycerate-dependent phosphoglycerate mutase	4	4	1	1	708				686	686	686	34e9a6678acca924fbf24c6bf5608d56_4985	455a00a194b6732c15d9cd1ede6a821e_5033	8aa1aaefd30e370458343f447b9298d5_5004	S_aureus_12_00824
WP_000052599.1		ribonuclease J	4	4	1	1	1750				1673	1673	1673	34e9a6678acca924fbf24c6bf5608d56_2434	455a00a194b6732c15d9cd1ede6a821e_2484	8aa1aaefd30e370458343f447b9298d5_2565	S_aureus_12_01743
parC		DNA topoisomerase IV subunit A	4	4	1	1	2520				2402	2402	2402	34e9a6678acca924fbf24c6bf5608d56_2628	455a00a194b6732c15d9cd1ede6a821e_2714	8aa1aaefd30e370458343f447b9298d5_2733	S_aureus_12_02457
WP_000067112.1		GNAT family N-acetyltransferase	4	4	1	1	608				284	284	284	34e9a6678acca924fbf24c6bf5608d56_5191	455a00a194b6732c15d9cd1ede6a821e_5233	8aa1aaefd30e370458343f447b9298d5_5214	S_aureus_12_00334
tuf		elongation factor Tu	4	4	1	1	2732				1184	1184	1184	34e9a6678acca924fbf24c6bf5608d56_1059	455a00a194b6732c15d9cd1ede6a821e_1100	8aa1aaefd30e370458343f447b9298d5_1195	S_aureus_12_01537
WP_000426914.1		acyl carrier protein	4	4	1	1	1706				233	233	233	34e9a6678acca924fbf24c6bf5608d56_2344	455a00a194b6732c15d9cd1ede6a821e_2394	8aa1aaefd30e370458343f447b9298d5_2475	S_aureus_12_01786
WP_000773985.1		hypothetical protein	4	4	1	1	1931				173	173	173	34e9a6678acca924fbf24c6bf5608d56_397	455a00a194b6732c15d9cd1ede6a821e_366	8aa1aaefd30e370458343f447b9298d5_530	S_aureus_12_00154
WP_001100526.1		ketoacyl-ACP synthase III	4	4	1	1	1960				941	941	941	34e9a6678acca924fbf24c6bf5608d56_1812	455a00a194b6732c15d9cd1ede6a821e_1865	8aa1aaefd30e370458343f447b9298d5_1940	S_aureus_12_02619
WP_000995290.1		BrxA/BrxB family bacilliredoxin	4	4	1	1	1677				437	437	437	34e9a6678acca924fbf24c6bf5608d56_2779	455a00a194b6732c15d9cd1ede6a821e_2864	8aa1aaefd30e370458343f447b9298d5_2883	S_aureus_12_00893
WP_000721558.1		osmoprotectant ABC transporter substrate-binding protein	4	4	1	1	677				941	941	941	34e9a6678acca924fbf24c6bf5608d56_5049	455a00a194b6732c15d9cd1ede6a821e_5097	8aa1aaefd30e370458343f447b9298d5_5068	S_aureus_12_00853
WP_001020627.1		XRE family transcriptional regulator	4	4	1	1	2604				539	539	539	34e9a6678acca924fbf24c6bf5608d56_2069	455a00a194b6732c15d9cd1ede6a821e_2119	8aa1aaefd30e370458343f447b9298d5_2200	S_aureus_12_01599
WP_000213898.1		DHA2 family efflux MFS transporter permease subunit	4	4	1	1	777				1937	1937	1937	34e9a6678acca924fbf24c6bf5608d56_4843	455a00a194b6732c15d9cd1ede6a821e_4889	8aa1aaefd30e370458343f447b9298d5_4860	S_aureus_12_00756
WP_001044234.1		acetyltransferase	4	4	1	1	1951				1814	1814	1814	34e9a6678acca924fbf24c6bf5608d56_1794	455a00a194b6732c15d9cd1ede6a821e_1847	8aa1aaefd30e370458343f447b9298d5_1922	S_aureus_12_02628
WP_000791402.1		leukocidin family pore-forming toxin	4	4	1	1	2768				1055	1055	1055	34e9a6678acca924fbf24c6bf5608d56_4132	455a00a194b6732c15d9cd1ede6a821e_4174	8aa1aaefd30e370458343f447b9298d5_4152	S_aureus_12_02318
rplA		50S ribosomal protein L1	4	4	1	1	2742				689	692	691	34e9a6678acca924fbf24c6bf5608d56_1038	455a00a194b6732c15d9cd1ede6a821e_1079	8aa1aaefd30e370458343f447b9298d5_1174	S_aureus_12_01547
WP_000980141.1		hypothetical protein	4	4	1	1	1146				1067	1067	1067	34e9a6678acca924fbf24c6bf5608d56_1277	455a00a194b6732c15d9cd1ede6a821e_1314	8aa1aaefd30e370458343f447b9298d5_1411	S_aureus_12_01431
WP_000365308.1		TSUP family transporter	4	4	1	1	46				770	770	770	34e9a6678acca924fbf24c6bf5608d56_3489	455a00a194b6732c15d9cd1ede6a821e_3555	8aa1aaefd30e370458343f447b9298d5_3456	S_aureus_12_02086
WP_000026190.1		MFS transporter	4	4	1	1	669				1187	1187	1187	34e9a6678acca924fbf24c6bf5608d56_5065	455a00a194b6732c15d9cd1ede6a821e_5113	8aa1aaefd30e370458343f447b9298d5_5084	S_aureus_12_00859
WP_000778481.1		superantigen-like protein SSL9	4	4	1	1	1202				698	698	698	34e9a6678acca924fbf24c6bf5608d56_749	455a00a194b6732c15d9cd1ede6a821e_791	8aa1aaefd30e370458343f447b9298d5_876	S_aureus_12_02274
yqeH		ribosome biogenesis GTPase YqeH	4	4	1	1	1394				1100	1100	1100	34e9a6678acca924fbf24c6bf5608d56_3256	455a00a194b6732c15d9cd1ede6a821e_3327	8aa1aaefd30e370458343f447b9298d5_3228	S_aureus_12_01128
WP_001573518.1		NAD-dependent protein deacylase	4	4	1	1	2943				740	740	740	34e9a6678acca924fbf24c6bf5608d56_4530	455a00a194b6732c15d9cd1ede6a821e_4573	8aa1aaefd30e370458343f447b9298d5_4549	S_aureus_12_00611
budA		acetolactate decarboxylase	4	4	1	1	2954				704	704	704	34e9a6678acca924fbf24c6bf5608d56_4554	455a00a194b6732c15d9cd1ede6a821e_4597	8aa1aaefd30e370458343f447b9298d5_4571	S_aureus_12_00621
WP_000514375.1		nitrate reductase subunit alpha	4	4	1	1	728				3689	3689	3689	34e9a6678acca924fbf24c6bf5608d56_4943	455a00a194b6732c15d9cd1ede6a821e_4991	8aa1aaefd30e370458343f447b9298d5_4962	S_aureus_12_00804
WP_000284992.1		NAD(P)/FAD-dependent oxidoreductase	4	4	1	1	155				1268	1268	1268	34e9a6678acca924fbf24c6bf5608d56_3579	455a00a194b6732c15d9cd1ede6a821e_3657	8aa1aaefd30e370458343f447b9298d5_3548	S_aureus_12_01841
WP_001266540.1		fructose-specific PTS transporter subunit EIIC	4	4	1	1	2067				1958	1958	1958	34e9a6678acca924fbf24c6bf5608d56_1373	455a00a194b6732c15d9cd1ede6a821e_1476	8aa1aaefd30e370458343f447b9298d5_1507	S_aureus_12_01385
dtd		D-aminoacyl-tRNA deacylase	4	4	1	1	242				452	452	452	34e9a6678acca924fbf24c6bf5608d56_3329	455a00a194b6732c15d9cd1ede6a821e_3400	8aa1aaefd30e370458343f447b9298d5_3301	S_aureus_12_01163
WP_000544973.1		type 1 glutamine amidotransferase	4	4	1	1	1067				731	731	731	34e9a6678acca924fbf24c6bf5608d56_3978	455a00a194b6732c15d9cd1ede6a821e_4064	8aa1aaefd30e370458343f447b9298d5_3944	S_aureus_12_02193
QOB70841.1		alcohol dehydrogenase catalytic domain-containing protein	4	4	1	1	1917				1025	1025	1025	34e9a6678acca924fbf24c6bf5608d56_427	455a00a194b6732c15d9cd1ede6a821e_396	8aa1aaefd30e370458343f447b9298d5_560	S_aureus_12_00141
rsmG		16S rRNA (guanine(527)-N(7))-methyltransferase RsmG	4	4	1	1	413				719	719	719	34e9a6678acca924fbf24c6bf5608d56_5585	455a00a194b6732c15d9cd1ede6a821e_5628	8aa1aaefd30e370458343f447b9298d5_5610	S_aureus_12_00519
WP_000835980.1		tandem-type lipoprotein	4	4	1	1	1190				794	794	794	34e9a6678acca924fbf24c6bf5608d56_771	455a00a194b6732c15d9cd1ede6a821e_817	8aa1aaefd30e370458343f447b9298d5_902	S_aureus_12_02261
tagH		teichoic acids export ABC transporter ATP-binding subunit TagH	4	4	1	1	1129				794	794	794	34e9a6678acca924fbf24c6bf5608d56_1243	455a00a194b6732c15d9cd1ede6a821e_1280	8aa1aaefd30e370458343f447b9298d5_1377	S_aureus_12_01447
rpsD		30S ribosomal protein S4	4	4	1	1	51				602	602	602	34e9a6678acca924fbf24c6bf5608d56_3501	455a00a194b6732c15d9cd1ede6a821e_3567	8aa1aaefd30e370458343f447b9298d5_3468	S_aureus_12_02081
QOB71927.1		hypothetical protein	4	4	1	1	1644				1244	1244	1244	34e9a6678acca924fbf24c6bf5608d56_2848	455a00a194b6732c15d9cd1ede6a821e_2933	8aa1aaefd30e370458343f447b9298d5_2952	S_aureus_12_00926
pflB		formate C-acetyltransferase	4	4	1	1	1947				2249	2249	2249	34e9a6678acca924fbf24c6bf5608d56_365	455a00a194b6732c15d9cd1ede6a821e_334	8aa1aaefd30e370458343f447b9298d5_498	S_aureus_12_00168
WP_000094572.1		2-isopropylmalate synthase	4	4	1	1	2804				1529	1529	1529	34e9a6678acca924fbf24c6bf5608d56_4202	455a00a194b6732c15d9cd1ede6a821e_4246	8aa1aaefd30e370458343f447b9298d5_4224	S_aureus_12_02352
WP_001006454.1		cysteine desulfurase	4	4	1	1	2270				1241	1250	1247	34e9a6678acca924fbf24c6bf5608d56_1674	455a00a194b6732c15d9cd1ede6a821e_1727	8aa1aaefd30e370458343f447b9298d5_1802	S_aureus_12_01241
murA		UDP-N-acetylglucosamine 1-carboxyvinyltransferase	4	4	1	1	2848				1265	1265	1265	34e9a6678acca924fbf24c6bf5608d56_4311	455a00a194b6732c15d9cd1ede6a821e_4352	8aa1aaefd30e370458343f447b9298d5_4330	S_aureus_12_01995
putP		sodium/proline symporter PutP	4	4	1	1	1080				1538	1538	1538	34e9a6678acca924fbf24c6bf5608d56_4004	455a00a194b6732c15d9cd1ede6a821e_4090	8aa1aaefd30e370458343f447b9298d5_3970	S_aureus_12_02182
serA		phosphoglycerate dehydrogenase	4	4	1	1	55				1604	1604	1604	34e9a6678acca924fbf24c6bf5608d56_3509	455a00a194b6732c15d9cd1ede6a821e_3575	8aa1aaefd30e370458343f447b9298d5_3476	S_aureus_12_02077
QOB71007.1		aminotransferase class I/II-fold pyridoxal phosphate-dependent enzyme	4	4	1	1	2646				1142	1142	1142	34e9a6678acca924fbf24c6bf5608d56_811	455a00a194b6732c15d9cd1ede6a821e_857	8aa1aaefd30e370458343f447b9298d5_942	S_aureus_12_02245
trpA		tryptophan synthase subunit alpha	4	4	1	1	2015				728	728	728	34e9a6678acca924fbf24c6bf5608d56_2666	455a00a194b6732c15d9cd1ede6a821e_2752	8aa1aaefd30e370458343f447b9298d5_2771	S_aureus_12_02369
srrB		two-component system sensor histidine kinase SrrB	4	4	1	1	1502				1751	1751	1751	34e9a6678acca924fbf24c6bf5608d56_3037	455a00a194b6732c15d9cd1ede6a821e_3108	8aa1aaefd30e370458343f447b9298d5_3013	S_aureus_12_01022
gtfB		accessory Sec system glycosylation chaperone GtfB	4	4	1	1	477				1358	1358	1358	34e9a6678acca924fbf24c6bf5608d56_5461	455a00a194b6732c15d9cd1ede6a821e_5504	8aa1aaefd30e370458343f447b9298d5_5482	S_aureus_12_00455
metE		5-methyltetrahydropteroyltriglutamate--homocysteine S-methyltransferase	4	4	1	1	319				2228	2228	2228	34e9a6678acca924fbf24c6bf5608d56_649	455a00a194b6732c15d9cd1ede6a821e_645	8aa1aaefd30e370458343f447b9298d5_776	S_aureus_12_00034
metG		methionine--tRNA ligase	4	4	1	1	2676				1973	1973	1973	34e9a6678acca924fbf24c6bf5608d56_888	455a00a194b6732c15d9cd1ede6a821e_934	8aa1aaefd30e370458343f447b9298d5_1019	S_aureus_12_02540
hssS		heme sensor histidine kinase HssS	4	4	1	1	766				1373	1373	1373	34e9a6678acca924fbf24c6bf5608d56_4867	455a00a194b6732c15d9cd1ede6a821e_4913	8aa1aaefd30e370458343f447b9298d5_4886	S_aureus_12_00767
WP_000435104.1		aldo/keto reductase family oxidoreductase	4	4	1	1	2079				908	908	908	34e9a6678acca924fbf24c6bf5608d56_1349	455a00a194b6732c15d9cd1ede6a821e_1452	8aa1aaefd30e370458343f447b9298d5_1483	S_aureus_12_01397
WP_001794103.1		5-bromo-4-chloroindolyl phosphate hydrolysis family protein	4	4	1	1	1985				623	629	627	34e9a6678acca924fbf24c6bf5608d56_2729	455a00a194b6732c15d9cd1ede6a821e_2814	8aa1aaefd30e370458343f447b9298d5_2833	S_aureus_12_02399
recJ		single-stranded-DNA-specific exonuclease RecJ	4	4	1	1	245				2273	2273	2273	34e9a6678acca924fbf24c6bf5608d56_3335	455a00a194b6732c15d9cd1ede6a821e_3406	8aa1aaefd30e370458343f447b9298d5_3307	S_aureus_12_01166
QOB71875.1		nitric oxide reductase activation protein NorD	4	4	1	1	1982				1886	1886	1886	34e9a6678acca924fbf24c6bf5608d56_2735	455a00a194b6732c15d9cd1ede6a821e_2820	8aa1aaefd30e370458343f447b9298d5_2839	S_aureus_12_02402
essB		type VII secretion protein EssB	4	4	1	1	281				1334	1334	1334	34e9a6678acca924fbf24c6bf5608d56_499	455a00a194b6732c15d9cd1ede6a821e_470	8aa1aaefd30e370458343f447b9298d5_632	S_aureus_12_00107
QOB71208.1		LysM peptidoglycan-binding domain-containing protein	4	4	1	1	1157				797	797	797	34e9a6678acca924fbf24c6bf5608d56_1299	455a00a194b6732c15d9cd1ede6a821e_1336	8aa1aaefd30e370458343f447b9298d5_1433	S_aureus_12_01420
WP_001018965.1		toprim domain-containing protein	4	4	1	1	2388				386	389	386	34e9a6678acca924fbf24c6bf5608d56_1605	455a00a194b6732c15d9cd1ede6a821e_1708	8aa1aaefd30e370458343f447b9298d5_1783	S_aureus_12_01250
norA		multidrug efflux MFS transporter NorA	4	4	1	1	2072				1166	1166	1166	34e9a6678acca924fbf24c6bf5608d56_1363	455a00a194b6732c15d9cd1ede6a821e_1466	8aa1aaefd30e370458343f447b9298d5_1497	S_aureus_12_01390
narI		respiratory nitrate reductase subunit gamma	4	4	1	1	731				677	677	677	34e9a6678acca924fbf24c6bf5608d56_4937	455a00a194b6732c15d9cd1ede6a821e_4985	8aa1aaefd30e370458343f447b9298d5_4956	S_aureus_12_00801
gtfA		accessory Sec system glycosyltransferase GtfA	4	4	1	1	476				1508	1508	1508	34e9a6678acca924fbf24c6bf5608d56_5463	455a00a194b6732c15d9cd1ede6a821e_5506	8aa1aaefd30e370458343f447b9298d5_5484	S_aureus_12_00456
WP_000149686.1		cysteine hydrolase	4	4	1	1	1098				560	560	560	34e9a6678acca924fbf24c6bf5608d56_4040	455a00a194b6732c15d9cd1ede6a821e_4126	8aa1aaefd30e370458343f447b9298d5_4006	S_aureus_12_02165
ptsP		phosphoenolpyruvate--protein phosphotransferase	4	4	1	1	2619				1718	1718	1718	34e9a6678acca924fbf24c6bf5608d56_2039	455a00a194b6732c15d9cd1ede6a821e_2089	8aa1aaefd30e370458343f447b9298d5_2170	S_aureus_12_01613
alaS		alanine--tRNA ligase	4	4	1	1	227				2630	2633	2630	34e9a6678acca924fbf24c6bf5608d56_3296	455a00a194b6732c15d9cd1ede6a821e_3367	8aa1aaefd30e370458343f447b9298d5_3268	S_aureus_12_01149
purE		5-(carboxyamino)imidazole ribonucleotide mutase	4	4	1	1	2587				482	482	482	34e9a6678acca924fbf24c6bf5608d56_2000	455a00a194b6732c15d9cd1ede6a821e_2050	8aa1aaefd30e370458343f447b9298d5_2129	S_aureus_12_01632
WP_001109295.1		rhodanese-related sulfurtransferase	4	4	1	1	435				956	956	956	34e9a6678acca924fbf24c6bf5608d56_5541	455a00a194b6732c15d9cd1ede6a821e_5584	8aa1aaefd30e370458343f447b9298d5_5566	S_aureus_12_00497
WP_000836424.1		amidohydrolase family protein	4	4	1	1	550				1010	1010	1010	34e9a6678acca924fbf24c6bf5608d56_5311	455a00a194b6732c15d9cd1ede6a821e_5353	8aa1aaefd30e370458343f447b9298d5_5334	S_aureus_12_00389
WP_000453316.1		aldo/keto reductase	4	4	1	1	184				833	833	833	34e9a6678acca924fbf24c6bf5608d56_3638	455a00a194b6732c15d9cd1ede6a821e_3718	8aa1aaefd30e370458343f447b9298d5_3607	S_aureus_12_01870
WP_000739586.1		superantigen-like protein SSL14	4	4	1	1	2035				725	725	725	34e9a6678acca924fbf24c6bf5608d56_2211	455a00a194b6732c15d9cd1ede6a821e_2261	8aa1aaefd30e370458343f447b9298d5_2342	S_aureus_12_02577
WP_000751698.1		hypothetical protein	4	4	1	1	1803				953	953	953	34e9a6678acca924fbf24c6bf5608d56_2306	455a00a194b6732c15d9cd1ede6a821e_2356	8aa1aaefd30e370458343f447b9298d5_2437	S_aureus_12_01805
sbnE		L-2,3-diaminopropanoate--citrate ligase SbnE	4	4	1	1	1270				1736	1736	1736	34e9a6678acca924fbf24c6bf5608d56_169	455a00a194b6732c15d9cd1ede6a821e_140	8aa1aaefd30e370458343f447b9298d5_306	S_aureus_12_00264
thiM		hydroxyethylthiazole kinase	4	4	1	1	2840				791	791	791	34e9a6678acca924fbf24c6bf5608d56_4296	455a00a194b6732c15d9cd1ede6a821e_4337	8aa1aaefd30e370458343f447b9298d5_4315	S_aureus_12_01987
WP_000840565.1		class I SAM-dependent methyltransferase	4	4	1	1	44				947	947	947	34e9a6678acca924fbf24c6bf5608d56_3485	455a00a194b6732c15d9cd1ede6a821e_3551	8aa1aaefd30e370458343f447b9298d5_3452	S_aureus_12_02088
vraE		peptide resistance ABC transporter permease subunit VraE	4	4	1	1	424				1880	1880	1880	34e9a6678acca924fbf24c6bf5608d56_5563	455a00a194b6732c15d9cd1ede6a821e_5606	8aa1aaefd30e370458343f447b9298d5_5588	S_aureus_12_00508
WP_000354184.1		VOC family protein	4	4	1	1	1809				401	401	401	34e9a6678acca924fbf24c6bf5608d56_2294	455a00a194b6732c15d9cd1ede6a821e_2344	8aa1aaefd30e370458343f447b9298d5_2425	S_aureus_12_01811
WP_029264574.1		aldehyde dehydrogenase	4	4	1	1	1101				1379	1379	1379	34e9a6678acca924fbf24c6bf5608d56_4046	455a00a194b6732c15d9cd1ede6a821e_4132	8aa1aaefd30e370458343f447b9298d5_4012	S_aureus_12_02163
sufC		Fe-S cluster assembly ATPase SufC	4	4	1	1	2272				761	761	761	34e9a6678acca924fbf24c6bf5608d56_1670	455a00a194b6732c15d9cd1ede6a821e_1723	8aa1aaefd30e370458343f447b9298d5_1798	S_aureus_12_01243
WP_000080571.1		DNA2/NAM7 family helicase	4	4	1	1	1290				3152	3152	3152	34e9a6678acca924fbf24c6bf5608d56_129	455a00a194b6732c15d9cd1ede6a821e_100	8aa1aaefd30e370458343f447b9298d5_266	S_aureus_12_00284
WP_000070866.1		DNA starvation/stationary phase protection protein	4	4	1	1	2887				443	443	443	34e9a6678acca924fbf24c6bf5608d56_4389	455a00a194b6732c15d9cd1ede6a821e_4430	8aa1aaefd30e370458343f447b9298d5_4410	S_aureus_12_02034
rseP		RIP metalloprotease RseP	4	4	1	1	1737				1286	1286	1286	34e9a6678acca924fbf24c6bf5608d56_2408	455a00a194b6732c15d9cd1ede6a821e_2458	8aa1aaefd30e370458343f447b9298d5_2539	S_aureus_12_01756
WP_025173975.1		CDP-glycerol glycerophosphotransferase family protein	4	4	1	1	758				1673	1673	1673	34e9a6678acca924fbf24c6bf5608d56_4883	455a00a194b6732c15d9cd1ede6a821e_4929	8aa1aaefd30e370458343f447b9298d5_4902	S_aureus_12_00775
QOB71424.1		ornithine--oxo-acid transaminase	4	4	1	1	2228				1190	1190	1190	34e9a6678acca924fbf24c6bf5608d56_1760	455a00a194b6732c15d9cd1ede6a821e_1813	8aa1aaefd30e370458343f447b9298d5_1888	S_aureus_12_01200
holA		DNA polymerase III subunit delta	4	4	1	1	1404				974	974	974	34e9a6678acca924fbf24c6bf5608d56_3236	455a00a194b6732c15d9cd1ede6a821e_3307	8aa1aaefd30e370458343f447b9298d5_3210	S_aureus_12_01118
group_2482	cls	cardiolipin synthase	4	4	1	1	2836				1484	1484	1484	34e9a6678acca924fbf24c6bf5608d56_4286	455a00a194b6732c15d9cd1ede6a821e_4327	8aa1aaefd30e370458343f447b9298d5_4305	S_aureus_12_01983
aroD		type I 3-dehydroquinate dehydratase	4	4	1	1	2382				716	716	716	34e9a6678acca924fbf24c6bf5608d56_1593	455a00a194b6732c15d9cd1ede6a821e_1696	8aa1aaefd30e370458343f447b9298d5_1769	S_aureus_12_01256
WP_000822594.1		glycerophosphoryl diester phosphodiesterase membrane domain-containing protein	4	4	1	1	1944				1763	1763	1763	34e9a6678acca924fbf24c6bf5608d56_371	455a00a194b6732c15d9cd1ede6a821e_340	8aa1aaefd30e370458343f447b9298d5_504	S_aureus_12_00166
WP_000429002.1		diacylglycerol kinase family lipid kinase	4	4	1	1	2288				917	917	917	34e9a6678acca924fbf24c6bf5608d56_1425	455a00a194b6732c15d9cd1ede6a821e_1528	8aa1aaefd30e370458343f447b9298d5_1559	S_aureus_12_01359
rpoB		DNA-directed RNA polymerase subunit beta	4	4	1	1	2738				3551	3551	3551	34e9a6678acca924fbf24c6bf5608d56_1047	455a00a194b6732c15d9cd1ede6a821e_1088	8aa1aaefd30e370458343f447b9298d5_1183	S_aureus_12_01543
WP_000140679.1		F0F1 ATP synthase subunit B	4	4	1	1	2855				521	521	521	34e9a6678acca924fbf24c6bf5608d56_4325	455a00a194b6732c15d9cd1ede6a821e_4366	8aa1aaefd30e370458343f447b9298d5_4346	S_aureus_12_02002
qoxB		cytochrome aa3 quinol oxidase subunit I	4	4	1	1	2582				1988	1988	1988	34e9a6678acca924fbf24c6bf5608d56_1990	455a00a194b6732c15d9cd1ede6a821e_2040	8aa1aaefd30e370458343f447b9298d5_2119	S_aureus_12_01637
QOB71173.1		MFS transporter	4	4	1	1	1334				1148	1148	1148	34e9a6678acca924fbf24c6bf5608d56_1227	455a00a194b6732c15d9cd1ede6a821e_1264	8aa1aaefd30e370458343f447b9298d5_1361	S_aureus_12_01455
WP_000610969.1		GNAT family N-acetyltransferase	4	4	1	1	442				497	497	497	34e9a6678acca924fbf24c6bf5608d56_5527	455a00a194b6732c15d9cd1ede6a821e_5570	8aa1aaefd30e370458343f447b9298d5_5552	S_aureus_12_00490
WP_001794550.1		YibE/F family protein	4	4	1	1	2655				1112	1118	1116	34e9a6678acca924fbf24c6bf5608d56_829	455a00a194b6732c15d9cd1ede6a821e_875	8aa1aaefd30e370458343f447b9298d5_960	S_aureus_12_02236
QOB72009.1		prepilin-type N-terminal cleavage/methylation domain-containing protein	4	4	1	1	1448				311	311	311	34e9a6678acca924fbf24c6bf5608d56_3148	455a00a194b6732c15d9cd1ede6a821e_3219	8aa1aaefd30e370458343f447b9298d5_3122	S_aureus_12_01075
coaE		dephospho-CoA kinase	4	4	1	1	20				623	623	623	34e9a6678acca924fbf24c6bf5608d56_3437	455a00a194b6732c15d9cd1ede6a821e_3503	8aa1aaefd30e370458343f447b9298d5_3404	S_aureus_12_02111
QOB70984.1		superantigen-like protein SSL10	4	4	1	1	1201				683	683	683	34e9a6678acca924fbf24c6bf5608d56_751	455a00a194b6732c15d9cd1ede6a821e_793	8aa1aaefd30e370458343f447b9298d5_878	S_aureus_12_02273
WP_000221181.1		metalloregulator ArsR/SmtB family transcription factor	4	4	1	1	171				314	314	314	34e9a6678acca924fbf24c6bf5608d56_3612	455a00a194b6732c15d9cd1ede6a821e_3692	8aa1aaefd30e370458343f447b9298d5_3581	S_aureus_12_01857
mvaD		diphosphomevalonate decarboxylase	4	4	1	1	1326				983	983	983	34e9a6678acca924fbf24c6bf5608d56_1143	455a00a194b6732c15d9cd1ede6a821e_1182	8aa1aaefd30e370458343f447b9298d5_1279	S_aureus_12_01495
WP_000619360.1		LeuA family protein	4	4	1	1	1954				1145	1145	1145	34e9a6678acca924fbf24c6bf5608d56_1800	455a00a194b6732c15d9cd1ede6a821e_1853	8aa1aaefd30e370458343f447b9298d5_1928	S_aureus_12_02625
hchA		protein deglycase HchA	4	4	1	1	2729				878	878	878	34e9a6678acca924fbf24c6bf5608d56_1065	455a00a194b6732c15d9cd1ede6a821e_1106	8aa1aaefd30e370458343f447b9298d5_1201	S_aureus_12_01534
WP_020967626.1		ATP-binding protein	4	4	1	1	1184				458	584	500	34e9a6678acca924fbf24c6bf5608d56_2516	455a00a194b6732c15d9cd1ede6a821e_2596	8aa1aaefd30e370458343f447b9298d5_2647	S_aureus_12_02416
WP_000241308.1		DUF1273 domain-containing protein	4	4	1	1	1660				563	563	563	34e9a6678acca924fbf24c6bf5608d56_2816	455a00a194b6732c15d9cd1ede6a821e_2901	8aa1aaefd30e370458343f447b9298d5_2920	S_aureus_12_00910
WP_000793023.1		purine permease	4	4	1	1	1228				1268	1268	1268	34e9a6678acca924fbf24c6bf5608d56_715	455a00a194b6732c15d9cd1ede6a821e_757	8aa1aaefd30e370458343f447b9298d5_844	S_aureus_12_00004
xseA		exodeoxyribonuclease VII large subunit	4	4	1	1	1467				1337	1337	1337	34e9a6678acca924fbf24c6bf5608d56_3109	455a00a194b6732c15d9cd1ede6a821e_3180	8aa1aaefd30e370458343f447b9298d5_3083	S_aureus_12_01057
WP_000412510.1		APC family permease	4	4	1	1	1319				1484	1484	1484	34e9a6678acca924fbf24c6bf5608d56_1129	455a00a194b6732c15d9cd1ede6a821e_1168	8aa1aaefd30e370458343f447b9298d5_1265	S_aureus_12_01502
cap8C		type 8 capsular polysaccharide synthesis protein Cap8C	4	4	1	1	1828				764	764	764	34e9a6678acca924fbf24c6bf5608d56_233	455a00a194b6732c15d9cd1ede6a821e_204	8aa1aaefd30e370458343f447b9298d5_368	S_aureus_12_00233
secY		preprotein translocase subunit SecY	4	4	1	1	901				1292	1292	1292	34e9a6678acca924fbf24c6bf5608d56_4594	455a00a194b6732c15d9cd1ede6a821e_4640	8aa1aaefd30e370458343f447b9298d5_4609	S_aureus_12_00637
deoC		deoxyribose-phosphate aldolase	4	4	1	1	2885				662	662	662	34e9a6678acca924fbf24c6bf5608d56_4385	455a00a194b6732c15d9cd1ede6a821e_4426	8aa1aaefd30e370458343f447b9298d5_4406	S_aureus_12_02032
WP_000768182.1		phosphoribosylanthranilate isomerase	4	4	1	1	2017				632	635	632	34e9a6678acca924fbf24c6bf5608d56_2662	455a00a194b6732c15d9cd1ede6a821e_2748	8aa1aaefd30e370458343f447b9298d5_2767	S_aureus_12_02367
QOB72958.1		fructosamine kinase family protein	4	4	1	1	542				866	866	866	34e9a6678acca924fbf24c6bf5608d56_5327	455a00a194b6732c15d9cd1ede6a821e_5369	8aa1aaefd30e370458343f447b9298d5_5350	S_aureus_12_00397
WP_000598444.1		YutD family protein	4	4	1	1	2260				383	383	383	34e9a6678acca924fbf24c6bf5608d56_1696	455a00a194b6732c15d9cd1ede6a821e_1749	8aa1aaefd30e370458343f447b9298d5_1824	S_aureus_12_01231
phoU		phosphate signaling complex protein PhoU	4	4	1	1	2004				641	641	641	34e9a6678acca924fbf24c6bf5608d56_2690	455a00a194b6732c15d9cd1ede6a821e_2776	8aa1aaefd30e370458343f447b9298d5_2795	S_aureus_12_02380
WP_000037081.1		YihY/virulence factor BrkB family protein	4	4	1	1	1058				1217	1217	1217	34e9a6678acca924fbf24c6bf5608d56_3960	455a00a194b6732c15d9cd1ede6a821e_4046	8aa1aaefd30e370458343f447b9298d5_3926	S_aureus_12_02201
sirC		staphyloferrin B ABC transporter permease subunit SirC	4	4	1	1	1277				998	998	998	34e9a6678acca924fbf24c6bf5608d56_155	455a00a194b6732c15d9cd1ede6a821e_126	8aa1aaefd30e370458343f447b9298d5_292	S_aureus_12_00271
WP_000684046.1		2-dehydropantoate 2-reductase	4	4	1	1	680				935	935	935	34e9a6678acca924fbf24c6bf5608d56_5043	455a00a194b6732c15d9cd1ede6a821e_5091	8aa1aaefd30e370458343f447b9298d5_5062	S_aureus_12_00850
WP_000659679.1		Wzz/FepE/Etk N-terminal domain-containing protein	4	4	1	1	459				662	662	662	34e9a6678acca924fbf24c6bf5608d56_5495	455a00a194b6732c15d9cd1ede6a821e_5538	8aa1aaefd30e370458343f447b9298d5_5518	S_aureus_12_00473
tpx		thiol peroxidase	4	4	1	1	45				494	494	494	34e9a6678acca924fbf24c6bf5608d56_3487	455a00a194b6732c15d9cd1ede6a821e_3553	8aa1aaefd30e370458343f447b9298d5_3454	S_aureus_12_02087
WP_000467123.1		heme A synthase	4	4	1	1	2203				911	920	913	34e9a6678acca924fbf24c6bf5608d56_2103	455a00a194b6732c15d9cd1ede6a821e_2153	8aa1aaefd30e370458343f447b9298d5_2234	S_aureus_12_01583
fakA		fatty acid kinase catalytic subunit FakA	4	4	1	1	1700				1646	1646	1646	34e9a6678acca924fbf24c6bf5608d56_2332	455a00a194b6732c15d9cd1ede6a821e_2382	8aa1aaefd30e370458343f447b9298d5_2463	S_aureus_12_01792
WP_000849445.1		hypothetical protein	4	4	1	1	23				1487	1487	1487	34e9a6678acca924fbf24c6bf5608d56_3443	455a00a194b6732c15d9cd1ede6a821e_3509	8aa1aaefd30e370458343f447b9298d5_3410	S_aureus_12_02108
WP_000956150.1		hypothetical protein	4	4	1	1	1224				956	956	956	34e9a6678acca924fbf24c6bf5608d56_706	455a00a194b6732c15d9cd1ede6a821e_748	8aa1aaefd30e370458343f447b9298d5_835	S_aureus_12_00008
WP_000404628.1		virulence factor	4	4	1	1	1676				1124	1124	1124	34e9a6678acca924fbf24c6bf5608d56_2781	455a00a194b6732c15d9cd1ede6a821e_2866	8aa1aaefd30e370458343f447b9298d5_2885	S_aureus_12_00894
WP_029264487.1		DUF4870 domain-containing protein	4	4	1	1	827				422	422	422	34e9a6678acca924fbf24c6bf5608d56_4742	455a00a194b6732c15d9cd1ede6a821e_4788	8aa1aaefd30e370458343f447b9298d5_4759	S_aureus_12_00707
WP_160200229.1		NFACT family protein	4	4	1	1	1808				1697	1697	1697	34e9a6678acca924fbf24c6bf5608d56_2296	455a00a194b6732c15d9cd1ede6a821e_2346	8aa1aaefd30e370458343f447b9298d5_2427	S_aureus_12_01810
lpl2_1		tandem-type lipoprotein	4	4	1	1	1191				800	803	800	34e9a6678acca924fbf24c6bf5608d56_769	455a00a194b6732c15d9cd1ede6a821e_815	8aa1aaefd30e370458343f447b9298d5_900	S_aureus_12_02262
fdhD		formate dehydrogenase accessory sulfurtransferase FdhD	4	4	1	1	849				797	797	797	34e9a6678acca924fbf24c6bf5608d56_4698	455a00a194b6732c15d9cd1ede6a821e_4744	8aa1aaefd30e370458343f447b9298d5_4713	S_aureus_12_00686
WP_000286469.1		NADH-dependent flavin oxidoreductase	4	4	1	1	354				1214	1214	1214	34e9a6678acca924fbf24c6bf5608d56_581	455a00a194b6732c15d9cd1ede6a821e_577	8aa1aaefd30e370458343f447b9298d5_708	S_aureus_12_00068
QOB71774.1		aminotransferase class I/II-fold pyridoxal phosphate-dependent enzyme	4	4	1	1	1781				1238	1238	1238	34e9a6678acca924fbf24c6bf5608d56_2496	455a00a194b6732c15d9cd1ede6a821e_2546	8aa1aaefd30e370458343f447b9298d5_2627	S_aureus_12_01712
rsmD		16S rRNA (guanine(966)-N(2))-methyltransferase RsmD	4	4	1	1	2211				542	542	542	34e9a6678acca924fbf24c6bf5608d56_2119	455a00a194b6732c15d9cd1ede6a821e_2169	8aa1aaefd30e370458343f447b9298d5_2250	S_aureus_12_01575
tmk		dTMP kinase	4	4	1	1	2668				617	617	617	34e9a6678acca924fbf24c6bf5608d56_872	455a00a194b6732c15d9cd1ede6a821e_918	8aa1aaefd30e370458343f447b9298d5_1003	S_aureus_12_02548
WP_000824929.1		SDR family oxidoreductase	4	4	1	1	650				818	818	818	34e9a6678acca924fbf24c6bf5608d56_5103	455a00a194b6732c15d9cd1ede6a821e_5147	8aa1aaefd30e370458343f447b9298d5_5122	S_aureus_12_00878
thiD		bifunctional hydroxymethylpyrimidine kinase/phosphomethylpyrimidine kinase	4	4	1	1	1315				830	830	830	34e9a6678acca924fbf24c6bf5608d56_1121	455a00a194b6732c15d9cd1ede6a821e_1160	8aa1aaefd30e370458343f447b9298d5_1257	S_aureus_12_01506
arlR		response regulator transcription factor ArlR	4	4	1	1	1975				659	659	659	34e9a6678acca924fbf24c6bf5608d56_2749	455a00a194b6732c15d9cd1ede6a821e_2834	8aa1aaefd30e370458343f447b9298d5_2853	S_aureus_12_02409
QOB71114.1		glycosyltransferase	4	4	1	1	2716				1490	1490	1490	34e9a6678acca924fbf24c6bf5608d56_1093	455a00a194b6732c15d9cd1ede6a821e_1132	8aa1aaefd30e370458343f447b9298d5_1229	S_aureus_12_01520
aroA		3-phosphoshikimate 1-carboxyvinyltransferase	4	4	1	1	1643				1298	1298	1298	34e9a6678acca924fbf24c6bf5608d56_2850	455a00a194b6732c15d9cd1ede6a821e_2935	8aa1aaefd30e370458343f447b9298d5_2954	S_aureus_12_00927
QOB71975.1		carbohydrate kinase family protein	4	4	1	1	1482				899	899	899	34e9a6678acca924fbf24c6bf5608d56_3079	455a00a194b6732c15d9cd1ede6a821e_3150	8aa1aaefd30e370458343f447b9298d5_3053	S_aureus_12_01041
QOB71052.1		polysaccharide biosynthesis protein	4	4	1	1	2691				1526	1526	1526	34e9a6678acca924fbf24c6bf5608d56_918	455a00a194b6732c15d9cd1ede6a821e_964	8aa1aaefd30e370458343f447b9298d5_1049	S_aureus_12_02526
hflX		GTPase HflX	4	4	1	1	1780				1238	1238	1238	34e9a6678acca924fbf24c6bf5608d56_2494	455a00a194b6732c15d9cd1ede6a821e_2544	8aa1aaefd30e370458343f447b9298d5_2625	S_aureus_12_01713
narH		nitrate reductase subunit beta	4	4	1	1	729				1559	1559	1559	34e9a6678acca924fbf24c6bf5608d56_4941	455a00a194b6732c15d9cd1ede6a821e_4989	8aa1aaefd30e370458343f447b9298d5_4960	S_aureus_12_00803
lepB		signal peptidase I	4	4	1	1	2044				524	524	524	34e9a6678acca924fbf24c6bf5608d56_1774	455a00a194b6732c15d9cd1ede6a821e_1827	8aa1aaefd30e370458343f447b9298d5_1902	S_aureus_12_01193
sirB		staphyloferrin B ABC transporter permease subunit SirB	4	4	1	1	1276				995	995	995	34e9a6678acca924fbf24c6bf5608d56_157	455a00a194b6732c15d9cd1ede6a821e_128	8aa1aaefd30e370458343f447b9298d5_294	S_aureus_12_00270
hslV		ATP-dependent protease subunit HslV	4	4	1	1	1726				545	545	545	34e9a6678acca924fbf24c6bf5608d56_2386	455a00a194b6732c15d9cd1ede6a821e_2436	8aa1aaefd30e370458343f447b9298d5_2517	S_aureus_12_01765
QOB71802.1		catalase	4	4	1	1	2498				1517	1517	1517	34e9a6678acca924fbf24c6bf5608d56_2584	455a00a194b6732c15d9cd1ede6a821e_2670	8aa1aaefd30e370458343f447b9298d5_2689	S_aureus_12_02437
WP_000181832.1		MurR/RpiR family transcriptional regulator	4	4	1	1	1870				875	878	875	34e9a6678acca924fbf24c6bf5608d56_317	455a00a194b6732c15d9cd1ede6a821e_288	8aa1aaefd30e370458343f447b9298d5_452	S_aureus_12_00191
yycH		hypothetical protein	4	4	1	1	2153				1334	1334	1334	34e9a6678acca924fbf24c6bf5608d56_49	455a00a194b6732c15d9cd1ede6a821e_49	8aa1aaefd30e370458343f447b9298d5_49	S_aureus_12_00545
fmtA		teichoic acid D-Ala esterase FmtA	4	4	1	1	2579				1193	1193	1193	34e9a6678acca924fbf24c6bf5608d56_1984	455a00a194b6732c15d9cd1ede6a821e_2034	8aa1aaefd30e370458343f447b9298d5_2113	S_aureus_12_01640
WP_000737654.1		metal ABC transporter substrate-binding protein	4	4	1	1	1123				929	929	929	34e9a6678acca924fbf24c6bf5608d56_1231	455a00a194b6732c15d9cd1ede6a821e_1268	8aa1aaefd30e370458343f447b9298d5_1365	S_aureus_12_01453
WP_000603961.1		ABC transporter permease	4	4	1	1	2483				731	731	731	34e9a6678acca924fbf24c6bf5608d56_2554	455a00a194b6732c15d9cd1ede6a821e_2640	8aa1aaefd30e370458343f447b9298d5_2659	S_aureus_12_02423
argJ		bifunctional glutamate N-acetyltransferase/amino-acid acetyltransferase ArgJ	4	4	1	1	1859				1241	1241	1241	34e9a6678acca924fbf24c6bf5608d56_295	455a00a194b6732c15d9cd1ede6a821e_266	8aa1aaefd30e370458343f447b9298d5_430	S_aureus_12_00202
QOB72112.1		valine--tRNA ligase	4	4	1	1	266				2630	2630	2630	34e9a6678acca924fbf24c6bf5608d56_3382	455a00a194b6732c15d9cd1ede6a821e_3449	8aa1aaefd30e370458343f447b9298d5_3350	S_aureus_12_01185
WP_000138342.1		penicillin-binding protein	4	4	1	1	1657				2150	2150	2150	34e9a6678acca924fbf24c6bf5608d56_2822	455a00a194b6732c15d9cd1ede6a821e_2907	8aa1aaefd30e370458343f447b9298d5_2926	S_aureus_12_00913
isdB		heme uptake protein IsdB	4	4	1	1	2436				1946	1958	1949	34e9a6678acca924fbf24c6bf5608d56_2129	455a00a194b6732c15d9cd1ede6a821e_2179	8aa1aaefd30e370458343f447b9298d5_2260	S_aureus_12_02496
WP_000403921.1		LysR family transcriptional regulator	4	4	1	1	2656				884	884	884	34e9a6678acca924fbf24c6bf5608d56_831	455a00a194b6732c15d9cd1ede6a821e_877	8aa1aaefd30e370458343f447b9298d5_962	S_aureus_12_02235
WP_000667395.1		HAD family hydrolase	4	4	1	1	2709				647	647	647	34e9a6678acca924fbf24c6bf5608d56_1107	455a00a194b6732c15d9cd1ede6a821e_1146	8aa1aaefd30e370458343f447b9298d5_1243	S_aureus_12_01513
hisZ		ATP phosphoribosyltransferase regulatory subunit	4	4	1	1	444				818	818	818	34e9a6678acca924fbf24c6bf5608d56_5523	455a00a194b6732c15d9cd1ede6a821e_5566	8aa1aaefd30e370458343f447b9298d5_5548	S_aureus_12_00488
groL		chaperonin GroEL	4	4	1	1	2774				1616	1616	1616	34e9a6678acca924fbf24c6bf5608d56_4142	455a00a194b6732c15d9cd1ede6a821e_4186	8aa1aaefd30e370458343f447b9298d5_4164	S_aureus_12_02324
WP_000209478.1		ABC transporter ATP-binding protein	4	4	1	1	324				842	842	842	34e9a6678acca924fbf24c6bf5608d56_639	455a00a194b6732c15d9cd1ede6a821e_635	8aa1aaefd30e370458343f447b9298d5_766	S_aureus_12_00039
WP_000217452.1		SDR family oxidoreductase	4	4	1	1	642				695	695	695	34e9a6678acca924fbf24c6bf5608d56_5119	455a00a194b6732c15d9cd1ede6a821e_5163	8aa1aaefd30e370458343f447b9298d5_5140	S_aureus_12_00301
WP_001270834.1		NAD kinase	4	4	1	1	392				809	809	809	34e9a6678acca924fbf24c6bf5608d56_1867	455a00a194b6732c15d9cd1ede6a821e_1918	8aa1aaefd30e370458343f447b9298d5_1995	S_aureus_12_01693
WP_001070682.1		thiolase family protein	4	4	1	1	2706				1139	1139	1139	34e9a6678acca924fbf24c6bf5608d56_1113	455a00a194b6732c15d9cd1ede6a821e_1152	8aa1aaefd30e370458343f447b9298d5_1249	S_aureus_12_01510
WP_000193955.1		hypothetical protein	4	4	1	1	73				1190	1190	1190	34e9a6678acca924fbf24c6bf5608d56_3545	455a00a194b6732c15d9cd1ede6a821e_3611	8aa1aaefd30e370458343f447b9298d5_3514	S_aureus_12_01824
purD		phosphoribosylamine--glycine ligase	4	4	1	1	2597				1247	1247	1247	34e9a6678acca924fbf24c6bf5608d56_2020	455a00a194b6732c15d9cd1ede6a821e_2070	8aa1aaefd30e370458343f447b9298d5_2149	S_aureus_12_01622
WP_000895198.1		ferrous iron transporter B	4	4	1	1	547				1340	1346	1341	34e9a6678acca924fbf24c6bf5608d56_5317	455a00a194b6732c15d9cd1ede6a821e_5359	8aa1aaefd30e370458343f447b9298d5_5340	S_aureus_12_00392
ychF		redox-regulated ATPase YchF	4	4	1	1	312				1097	1097	1097	34e9a6678acca924fbf24c6bf5608d56_664	455a00a194b6732c15d9cd1ede6a821e_660	8aa1aaefd30e370458343f447b9298d5_791	S_aureus_12_00027
icaA		poly-beta-1,6 N-acetyl-D-glucosamine synthase IcaA	4	4	1	1	457				1238	1238	1238	34e9a6678acca924fbf24c6bf5608d56_5499	455a00a194b6732c15d9cd1ede6a821e_5542	8aa1aaefd30e370458343f447b9298d5_5522	S_aureus_12_00475
grpE		nucleotide exchange factor GrpE	4	4	1	1	1409				626	626	626	34e9a6678acca924fbf24c6bf5608d56_3226	455a00a194b6732c15d9cd1ede6a821e_3297	8aa1aaefd30e370458343f447b9298d5_3200	S_aureus_12_01113
secA		preprotein translocase subunit SecA	4	4	1	1	2317				2531	2537	2532	34e9a6678acca924fbf24c6bf5608d56_1483	455a00a194b6732c15d9cd1ede6a821e_1586	8aa1aaefd30e370458343f447b9298d5_1615	S_aureus_12_01332
QOB71134.1		threonine/serine exporter ThrE family protein	4	4	1	1	1321				764	764	764	34e9a6678acca924fbf24c6bf5608d56_1133	455a00a194b6732c15d9cd1ede6a821e_1172	8aa1aaefd30e370458343f447b9298d5_1269	S_aureus_12_01500
WP_000182553.1		polysaccharide lyase 8 family protein	4	4	1	1	206				2420	2420	2420	34e9a6678acca924fbf24c6bf5608d56_3685	455a00a194b6732c15d9cd1ede6a821e_3767	8aa1aaefd30e370458343f447b9298d5_3654	S_aureus_12_01892
acnA		aconitate hydratase AcnA	4	4	1	1	2515				2705	2705	2705	34e9a6678acca924fbf24c6bf5608d56_2618	455a00a194b6732c15d9cd1ede6a821e_2704	8aa1aaefd30e370458343f447b9298d5_2723	S_aureus_12_02452
WP_160200220.1		phosphoglycerate kinase	4	4	1	1	2340				1190	1190	1190	34e9a6678acca924fbf24c6bf5608d56_1528	455a00a194b6732c15d9cd1ede6a821e_1631	8aa1aaefd30e370458343f447b9298d5_1660	S_aureus_12_01309
WP_001574632.1		DMT family transporter	4	4	1	1	1346				929	929	929	34e9a6678acca924fbf24c6bf5608d56_1203	455a00a194b6732c15d9cd1ede6a821e_1240	8aa1aaefd30e370458343f447b9298d5_1337	S_aureus_12_01467
QOB71101.1		ribulokinase	4	4	1	1	2728				1637	1637	1637	34e9a6678acca924fbf24c6bf5608d56_1067	455a00a194b6732c15d9cd1ede6a821e_1108	8aa1aaefd30e370458343f447b9298d5_1203	S_aureus_12_01533
WP_160200253.1		NAD(P)/FAD-dependent oxidoreductase	4	4	1	1	752				1034	1034	1034	34e9a6678acca924fbf24c6bf5608d56_4895	455a00a194b6732c15d9cd1ede6a821e_4941	8aa1aaefd30e370458343f447b9298d5_4914	S_aureus_12_00781
WP_000239139.1		D-glycerate dehydrogenase	4	4	1	1	2256				959	959	959	34e9a6678acca924fbf24c6bf5608d56_1704	455a00a194b6732c15d9cd1ede6a821e_1757	8aa1aaefd30e370458343f447b9298d5_1832	S_aureus_12_01227
tet(38)		tetracycline efflux MFS transporter Tet(38)	4	4	1	1	1254				1352	1358	1353	34e9a6678acca924fbf24c6bf5608d56_205	455a00a194b6732c15d9cd1ede6a821e_176	8aa1aaefd30e370458343f447b9298d5_340	S_aureus_12_00247
ftsY		signal recognition particle-docking protein FtsY	4	4	1	1	1709				1250	1250	1250	34e9a6678acca924fbf24c6bf5608d56_2350	455a00a194b6732c15d9cd1ede6a821e_2400	8aa1aaefd30e370458343f447b9298d5_2481	S_aureus_12_01783
WP_000280814.1		lipoate--protein ligase	4	4	1	1	348				1022	1022	1022	34e9a6678acca924fbf24c6bf5608d56_593	455a00a194b6732c15d9cd1ede6a821e_589	8aa1aaefd30e370458343f447b9298d5_720	S_aureus_12_00063
WP_000524841.1		ABC transporter ATP-binding protein	4	4	1	1	787				899	899	899	34e9a6678acca924fbf24c6bf5608d56_4823	455a00a194b6732c15d9cd1ede6a821e_4869	8aa1aaefd30e370458343f447b9298d5_4840	S_aureus_12_00746
WP_000149412.1		formate--tetrahydrofolate ligase	4	4	1	1	65				1667	1667	1667	34e9a6678acca924fbf24c6bf5608d56_3529	455a00a194b6732c15d9cd1ede6a821e_3595	8aa1aaefd30e370458343f447b9298d5_3496	S_aureus_12_02069
WP_001014082.1		sirohydrochlorin chelatase	4	4	1	1	724				752	752	752	34e9a6678acca924fbf24c6bf5608d56_4951	455a00a194b6732c15d9cd1ede6a821e_4999	8aa1aaefd30e370458343f447b9298d5_4970	S_aureus_12_00808
hisH		imidazole glycerol phosphate synthase subunit HisH	4	4	1	1	449				578	578	578	34e9a6678acca924fbf24c6bf5608d56_5513	455a00a194b6732c15d9cd1ede6a821e_5556	8aa1aaefd30e370458343f447b9298d5_5538	S_aureus_12_00483
WP_001217804.1		anthranilate synthase component I family protein	4	4	1	1	2053				1151	1151	1151	34e9a6678acca924fbf24c6bf5608d56_1401	455a00a194b6732c15d9cd1ede6a821e_1504	8aa1aaefd30e370458343f447b9298d5_1535	S_aureus_12_01371
QOB71865.1		amidohydrolase	4	4	1	1	1992				1151	1151	1151	34e9a6678acca924fbf24c6bf5608d56_2715	455a00a194b6732c15d9cd1ede6a821e_2800	8aa1aaefd30e370458343f447b9298d5_2819	S_aureus_12_02392
pmtD		phenol-soluble modulin export ABC transporter permease subunit PmtD	4	4	1	1	1110				740	740	740	34e9a6678acca924fbf24c6bf5608d56_4064	455a00a194b6732c15d9cd1ede6a821e_4150	8aa1aaefd30e370458343f447b9298d5_4030	S_aureus_12_02154
dnaJ		molecular chaperone DnaJ	4	4	1	1	1411				1139	1139	1139	34e9a6678acca924fbf24c6bf5608d56_3222	455a00a194b6732c15d9cd1ede6a821e_3293	8aa1aaefd30e370458343f447b9298d5_3196	S_aureus_12_01111
WP_000206033.1		acyl-CoA thioesterase	4	4	1	1	592				410	410	410	34e9a6678acca924fbf24c6bf5608d56_5225	455a00a194b6732c15d9cd1ede6a821e_5267	8aa1aaefd30e370458343f447b9298d5_5248	S_aureus_12_00349
WP_073392727.1		HAMP domain-containing sensor histidine kinase	4	4	1	1	24				1661	1664	1661	34e9a6678acca924fbf24c6bf5608d56_3445	455a00a194b6732c15d9cd1ede6a821e_3511	8aa1aaefd30e370458343f447b9298d5_3412	S_aureus_12_02107
WP_000409167.1		cysteine desulfurase	4	4	1	1	231				1142	1142	1142	34e9a6678acca924fbf24c6bf5608d56_3304	455a00a194b6732c15d9cd1ede6a821e_3375	8aa1aaefd30e370458343f447b9298d5_3276	S_aureus_12_01153
WP_001573541.1		YdcF family protein	4	4	1	1	770				968	968	968	34e9a6678acca924fbf24c6bf5608d56_4859	455a00a194b6732c15d9cd1ede6a821e_4905	8aa1aaefd30e370458343f447b9298d5_4878	S_aureus_12_00763
QOB71654.1		FtsQ-type POTRA domain-containing protein	4	4	1	1	1375				1319	1319	1319	34e9a6678acca924fbf24c6bf5608d56_2248	455a00a194b6732c15d9cd1ede6a821e_2298	8aa1aaefd30e370458343f447b9298d5_2379	S_aureus_12_02559
kdpA		potassium-transporting ATPase subunit KdpA	4	4	1	1	2825				1676	1676	1676	34e9a6678acca924fbf24c6bf5608d56_4262	455a00a194b6732c15d9cd1ede6a821e_4303	8aa1aaefd30e370458343f447b9298d5_4281	S_aureus_12_01973
QOB72480.1		D-alanine--D-alanine ligase	4	4	1	1	2831				1070	1070	1070	34e9a6678acca924fbf24c6bf5608d56_4274	455a00a194b6732c15d9cd1ede6a821e_4315	8aa1aaefd30e370458343f447b9298d5_4293	S_aureus_12_01978
WP_000721720.1		HAD family hydrolase	4	4	1	1	57				1130	1130	1130	34e9a6678acca924fbf24c6bf5608d56_3513	455a00a194b6732c15d9cd1ede6a821e_3579	8aa1aaefd30e370458343f447b9298d5_3480	S_aureus_12_02076
kimA		APC family permease	4	4	1	1	683				1829	1829	1829	34e9a6678acca924fbf24c6bf5608d56_5037	455a00a194b6732c15d9cd1ede6a821e_5085	8aa1aaefd30e370458343f447b9298d5_5056	S_aureus_12_00847
WP_000073195.1		MurR/RpiR family transcriptional regulator	4	4	1	1	814				872	872	872	34e9a6678acca924fbf24c6bf5608d56_4768	455a00a194b6732c15d9cd1ede6a821e_4814	8aa1aaefd30e370458343f447b9298d5_4785	S_aureus_12_00720
capA		capsular polysaccharide type 5/8 biosynthesis protein CapA	4	4	1	1	1826				668	668	668	34e9a6678acca924fbf24c6bf5608d56_229	455a00a194b6732c15d9cd1ede6a821e_200	8aa1aaefd30e370458343f447b9298d5_364	S_aureus_12_00235
WP_000615895.1		LysE family transporter	4	4	1	1	618				614	617	616	34e9a6678acca924fbf24c6bf5608d56_5171	455a00a194b6732c15d9cd1ede6a821e_5213	8aa1aaefd30e370458343f447b9298d5_5194	S_aureus_12_00324
rpsJ		30S ribosomal protein S10	4	4	1	1	880				308	308	308	34e9a6678acca924fbf24c6bf5608d56_4636	455a00a194b6732c15d9cd1ede6a821e_4682	8aa1aaefd30e370458343f447b9298d5_4651	S_aureus_12_00658
QOB72592.1		polysaccharide lyase 8 family protein	4	4	1	1	2950				2426	2426	2426	34e9a6678acca924fbf24c6bf5608d56_4546	455a00a194b6732c15d9cd1ede6a821e_4589	8aa1aaefd30e370458343f447b9298d5_4563	S_aureus_12_00617
WP_000909204.1		N-acetylmuramoyl-L-alanine amidase	4	6	1.5	1	1613				296	1454	889	34e9a6678acca924fbf24c6bf5608d56_2911 34e9a6678acca924fbf24c6bf5608d56_4092	455a00a194b6732c15d9cd1ede6a821e_2990	8aa1aaefd30e370458343f447b9298d5_4058	S_aureus_12_00952 S_aureus_12_02143
atl_2		glucosaminidase domain-containing protein	4	4	1	1	2575				3755	3773	3764	34e9a6678acca924fbf24c6bf5608d56_1976	455a00a194b6732c15d9cd1ede6a821e_2026	8aa1aaefd30e370458343f447b9298d5_2105	S_aureus_12_01644
pepT		peptidase T	4	4	1	1	2307				1226	1226	1226	34e9a6678acca924fbf24c6bf5608d56_1463	455a00a194b6732c15d9cd1ede6a821e_1566	8aa1aaefd30e370458343f447b9298d5_1595	S_aureus_12_01342
WP_000004340.1		polysaccharide biosynthesis protein	4	4	1	1	154				1661	1661	1661	34e9a6678acca924fbf24c6bf5608d56_3577	455a00a194b6732c15d9cd1ede6a821e_3655	8aa1aaefd30e370458343f447b9298d5_3546	S_aureus_12_01840
QOB70777.1		acyl-CoA/acyl-ACP dehydrogenase	4	4	1	1	1851				1031	1034	1031	34e9a6678acca924fbf24c6bf5608d56_279	455a00a194b6732c15d9cd1ede6a821e_250	8aa1aaefd30e370458343f447b9298d5_414	S_aureus_12_00210
WP_001015125.1		shikimate kinase	4	4	1	1	1453				524	524	524	34e9a6678acca924fbf24c6bf5608d56_3138	455a00a194b6732c15d9cd1ede6a821e_3209	8aa1aaefd30e370458343f447b9298d5_3112	S_aureus_12_01071
topA		type I DNA topoisomerase	4	4	1	1	1723				2075	2075	2075	34e9a6678acca924fbf24c6bf5608d56_2380	455a00a194b6732c15d9cd1ede6a821e_2430	8aa1aaefd30e370458343f447b9298d5_2511	S_aureus_12_01768
WP_000344325.1		DNA polymerase III subunit delta'	4	4	1	1	2670				926	926	926	34e9a6678acca924fbf24c6bf5608d56_876	455a00a194b6732c15d9cd1ede6a821e_922	8aa1aaefd30e370458343f447b9298d5_1007	S_aureus_12_02546
WP_000195908.1		cyclase family protein	4	4	1	1	320				752	752	752	34e9a6678acca924fbf24c6bf5608d56_647	455a00a194b6732c15d9cd1ede6a821e_643	8aa1aaefd30e370458343f447b9298d5_774	S_aureus_12_00035
WP_000140784.1		oxidoreductase	4	4	1	1	755				1004	1004	1004	34e9a6678acca924fbf24c6bf5608d56_4889	455a00a194b6732c15d9cd1ede6a821e_4935	8aa1aaefd30e370458343f447b9298d5_4908	S_aureus_12_00778
WP_029264491.1		energy-coupling factor transporter ATPase	4	4	1	1	2964				860	860	860	34e9a6678acca924fbf24c6bf5608d56_4576	455a00a194b6732c15d9cd1ede6a821e_4619	8aa1aaefd30e370458343f447b9298d5_4591	S_aureus_12_00628
WP_000927365.1		BglG family transcription antiterminator	4	4	1	1	2903				2132	2132	2132	34e9a6678acca924fbf24c6bf5608d56_4421	455a00a194b6732c15d9cd1ede6a821e_4464	8aa1aaefd30e370458343f447b9298d5_4440	S_aureus_12_02047
menH		2-succinyl-6-hydroxy-2,4-cyclohexadiene-1-carboxylate synthase	4	4	1	1	2564				803	803	803	34e9a6678acca924fbf24c6bf5608d56_1958	455a00a194b6732c15d9cd1ede6a821e_2008	8aa1aaefd30e370458343f447b9298d5_2087	S_aureus_12_01653
WP_001064829.1		ABC transporter ATP-binding protein/permease	4	4	1	1	694				1763	1763	1763	34e9a6678acca924fbf24c6bf5608d56_5015	455a00a194b6732c15d9cd1ede6a821e_5063	8aa1aaefd30e370458343f447b9298d5_5034	S_aureus_12_00837
miaB		tRNA (N6-isopentenyl adenosine(37)-C2)-methylthiotransferase MiaB	4	4	1	1	1767				1544	1544	1544	34e9a6678acca924fbf24c6bf5608d56_2468	455a00a194b6732c15d9cd1ede6a821e_2518	8aa1aaefd30e370458343f447b9298d5_2599	S_aureus_12_01726
WP_000342154.1		S41 family peptidase	4	4	1	1	1970				1490	1490	1490	34e9a6678acca924fbf24c6bf5608d56_2761	455a00a194b6732c15d9cd1ede6a821e_2846	8aa1aaefd30e370458343f447b9298d5_2865	S_aureus_12_02414
WP_001147969.1		PTS ascorbate transporter subunit IIC	4	4	1	1	346				1346	1346	1346	34e9a6678acca924fbf24c6bf5608d56_597	455a00a194b6732c15d9cd1ede6a821e_593	8aa1aaefd30e370458343f447b9298d5_724	S_aureus_12_00061
csbB		lipoteichoic acid-specific glycosylation protein CsbB	4	4	1	1	2063				983	983	983	34e9a6678acca924fbf24c6bf5608d56_1381	455a00a194b6732c15d9cd1ede6a821e_1484	8aa1aaefd30e370458343f447b9298d5_1515	S_aureus_12_01381
WP_000804336.1		2-oxoacid:acceptor oxidoreductase subunit alpha	4	4	1	1	1764				1760	1760	1760	34e9a6678acca924fbf24c6bf5608d56_2462	455a00a194b6732c15d9cd1ede6a821e_2512	8aa1aaefd30e370458343f447b9298d5_2593	S_aureus_12_01729
QOB72016.1		rhomboid family intramembrane serine protease	4	4	1	1	1441				1463	1463	1463	34e9a6678acca924fbf24c6bf5608d56_3162	455a00a194b6732c15d9cd1ede6a821e_3233	8aa1aaefd30e370458343f447b9298d5_3136	S_aureus_12_01081
WP_000062534.1		NAD(P)-binding protein	4	4	1	1	511				608	608	608	34e9a6678acca924fbf24c6bf5608d56_5395	455a00a194b6732c15d9cd1ede6a821e_5435	8aa1aaefd30e370458343f447b9298d5_5416	S_aureus_12_00425
dnaA		chromosomal replication initiator protein DnaA	4	4	1	1	2134				1361	1361	1361	34e9a6678acca924fbf24c6bf5608d56_3	455a00a194b6732c15d9cd1ede6a821e_3	8aa1aaefd30e370458343f447b9298d5_3	S_aureus_12_00524
WP_001041659.1		LysM peptidoglycan-binding domain-containing protein	4	4	1	1	1721				1118	1118	1118	34e9a6678acca924fbf24c6bf5608d56_2374	455a00a194b6732c15d9cd1ede6a821e_2424	8aa1aaefd30e370458343f447b9298d5_2505	S_aureus_12_01771
WP_000087104.1		aminopeptidase P family protein	4	4	1	1	1461				1061	1061	1061	34e9a6678acca924fbf24c6bf5608d56_3121	455a00a194b6732c15d9cd1ede6a821e_3192	8aa1aaefd30e370458343f447b9298d5_3095	S_aureus_12_01063
secA2		accessory Sec system translocase SecA2	4	4	1	1	475				2390	2390	2390	34e9a6678acca924fbf24c6bf5608d56_5465	455a00a194b6732c15d9cd1ede6a821e_5508	8aa1aaefd30e370458343f447b9298d5_5486	S_aureus_12_00457
WP_000185860.1		polysaccharide biosynthesis tyrosine autokinase	4	4	1	1	460				692	692	692	34e9a6678acca924fbf24c6bf5608d56_5493	455a00a194b6732c15d9cd1ede6a821e_5536	8aa1aaefd30e370458343f447b9298d5_5516	S_aureus_12_00472
plsY		glycerol-3-phosphate 1-O-acyltransferase PlsY	4	4	1	1	2518				608	608	608	34e9a6678acca924fbf24c6bf5608d56_2624	455a00a194b6732c15d9cd1ede6a821e_2710	8aa1aaefd30e370458343f447b9298d5_2729	S_aureus_12_02455
hutG		formimidoylglutamase	4	4	1	1	795				935	935	935	34e9a6678acca924fbf24c6bf5608d56_4807	455a00a194b6732c15d9cd1ede6a821e_4853	8aa1aaefd30e370458343f447b9298d5_4824	S_aureus_12_00739
QOB73145.1		DNA polymerase III subunit alpha	4	4	1	1	1739				4310	4316	4311	34e9a6678acca924fbf24c6bf5608d56_2412	455a00a194b6732c15d9cd1ede6a821e_2462	8aa1aaefd30e370458343f447b9298d5_2543	S_aureus_12_01754
brnQ		branched-chain amino acid transport system II carrier protein	4	4	1	1	1862				1355	1355	1355	34e9a6678acca924fbf24c6bf5608d56_301	455a00a194b6732c15d9cd1ede6a821e_272	8aa1aaefd30e370458343f447b9298d5_436	S_aureus_12_00199
WP_001021468.1		adenylate kinase	4	4	1	1	902				647	647	647	34e9a6678acca924fbf24c6bf5608d56_4592	455a00a194b6732c15d9cd1ede6a821e_4638	8aa1aaefd30e370458343f447b9298d5_4607	S_aureus_12_00636
dapD		2,3,4,5-tetrahydropyridine-2,6-dicarboxylate N-acetyltransferase	4	4	1	1	1993				719	719	719	34e9a6678acca924fbf24c6bf5608d56_2713	455a00a194b6732c15d9cd1ede6a821e_2798	8aa1aaefd30e370458343f447b9298d5_2817	S_aureus_12_02391
QOB71511.1		1,4-dihydroxy-2-naphthoate polyprenyltransferase	4	4	1	1	2560				938	938	938	34e9a6678acca924fbf24c6bf5608d56_1950	455a00a194b6732c15d9cd1ede6a821e_2000	8aa1aaefd30e370458343f447b9298d5_2079	S_aureus_12_01656
purF		amidophosphoribosyltransferase	4	4	1	1	2593				1484	1484	1484	34e9a6678acca924fbf24c6bf5608d56_2012	455a00a194b6732c15d9cd1ede6a821e_2062	8aa1aaefd30e370458343f447b9298d5_2141	S_aureus_12_01626
kdpB		potassium-transporting ATPase subunit KdpB	4	4	1	1	2824				2027	2027	2027	34e9a6678acca924fbf24c6bf5608d56_4260	455a00a194b6732c15d9cd1ede6a821e_4301	8aa1aaefd30e370458343f447b9298d5_4279	S_aureus_12_01972
gcvPA		aminomethyl-transferring glycine dehydrogenase subunit GcvPA	4	4	1	1	1455				1346	1346	1346	34e9a6678acca924fbf24c6bf5608d56_3133	455a00a194b6732c15d9cd1ede6a821e_3204	8aa1aaefd30e370458343f447b9298d5_3107	S_aureus_12_01069
mnhA2		Na+/H+ antiporter Mnh2 subunit A	4	4	1	1	1342				2402	2402	2402	34e9a6678acca924fbf24c6bf5608d56_1211	455a00a194b6732c15d9cd1ede6a821e_1248	8aa1aaefd30e370458343f447b9298d5_1345	S_aureus_12_01463
QOB71920.1		ATP-dependent DNA helicase DinG	4	4	1	1	1652				2693	2693	2693	34e9a6678acca924fbf24c6bf5608d56_2832	455a00a194b6732c15d9cd1ede6a821e_2917	8aa1aaefd30e370458343f447b9298d5_2936	S_aureus_12_00918
WP_000282169.1		queuosine precursor transporter	4	4	1	1	1673				704	704	704	34e9a6678acca924fbf24c6bf5608d56_2787	455a00a194b6732c15d9cd1ede6a821e_2872	8aa1aaefd30e370458343f447b9298d5_2891	S_aureus_12_00896
WP_001180212.1		NADP-dependent oxidoreductase	4	4	1	1	2933				1001	1004	1001	34e9a6678acca924fbf24c6bf5608d56_4510	455a00a194b6732c15d9cd1ede6a821e_4553	8aa1aaefd30e370458343f447b9298d5_4529	S_aureus_12_00601
WP_000820892.1		TIGR00730 family Rossman fold protein	4	4	1	1	2087				566	566	566	34e9a6678acca924fbf24c6bf5608d56_1333	455a00a194b6732c15d9cd1ede6a821e_1436	8aa1aaefd30e370458343f447b9298d5_1467	S_aureus_12_01405
nupC_1		NupC/NupG family nucleoside CNT transporter	4	4	1	1	362				1220	1220	1220	34e9a6678acca924fbf24c6bf5608d56_563	455a00a194b6732c15d9cd1ede6a821e_559	8aa1aaefd30e370458343f447b9298d5_690	S_aureus_12_00078
ftsA		cell division protein FtsA	4	4	1	1	1376				1406	1406	1406	34e9a6678acca924fbf24c6bf5608d56_2250	455a00a194b6732c15d9cd1ede6a821e_2300	8aa1aaefd30e370458343f447b9298d5_2381	S_aureus_12_02558
prmC		peptide chain release factor N(5)-glutamine methyltransferase	4	4	1	1	2865				836	836	836	34e9a6678acca924fbf24c6bf5608d56_4345	455a00a194b6732c15d9cd1ede6a821e_4386	8aa1aaefd30e370458343f447b9298d5_4366	S_aureus_12_02012
glmU		bifunctional UDP-N-acetylglucosamine diphosphorylase/glucosamine-1-phosphate N-acetyltransferase GlmU	4	4	1	1	2686				1352	1352	1352	34e9a6678acca924fbf24c6bf5608d56_908	455a00a194b6732c15d9cd1ede6a821e_954	8aa1aaefd30e370458343f447b9298d5_1039	S_aureus_12_02531
thrC		threonine synthase	4	4	1	1	2492				1061	1061	1061	34e9a6678acca924fbf24c6bf5608d56_2572	455a00a194b6732c15d9cd1ede6a821e_2658	8aa1aaefd30e370458343f447b9298d5_2677	S_aureus_12_02432
argO_2		LysE/ArgO family amino acid transporter	4	4	1	1	2379				617	617	617	34e9a6678acca924fbf24c6bf5608d56_1587	455a00a194b6732c15d9cd1ede6a821e_1690	8aa1aaefd30e370458343f447b9298d5_1763	S_aureus_12_01259
WP_000751212.1		CHAP domain-containing protein	4	4	1	1	2188				893	902	895	34e9a6678acca924fbf24c6bf5608d56_489	455a00a194b6732c15d9cd1ede6a821e_458	8aa1aaefd30e370458343f447b9298d5_622	S_aureus_12_00112
WP_001178940.1		DEAD/DEAH box helicase	4	4	1	1	2829				1520	1520	1520	34e9a6678acca924fbf24c6bf5608d56_4270	455a00a194b6732c15d9cd1ede6a821e_4311	8aa1aaefd30e370458343f447b9298d5_4289	S_aureus_12_01976
ykoD_2		energy-coupling factor ABC transporter ATP-binding protein	4	4	1	1	2599				1400	1400	1400	34e9a6678acca924fbf24c6bf5608d56_2024	455a00a194b6732c15d9cd1ede6a821e_2074	8aa1aaefd30e370458343f447b9298d5_2153	S_aureus_12_01620
QOB72125.1		hypothetical protein	4	4	1	1	8				929	929	929	34e9a6678acca924fbf24c6bf5608d56_3411	455a00a194b6732c15d9cd1ede6a821e_3478	8aa1aaefd30e370458343f447b9298d5_3379	S_aureus_12_02122
WP_000525101.1		ABC-F family ATP-binding cassette domain-containing protein	4	4	1	1	2282				1877	1883	1881	34e9a6678acca924fbf24c6bf5608d56_1413	455a00a194b6732c15d9cd1ede6a821e_1516	8aa1aaefd30e370458343f447b9298d5_1547	S_aureus_12_01366
hslU		ATP-dependent protease ATPase subunit HslU	4	4	1	1	1727				1403	1403	1403	34e9a6678acca924fbf24c6bf5608d56_2388	455a00a194b6732c15d9cd1ede6a821e_2438	8aa1aaefd30e370458343f447b9298d5_2519	S_aureus_12_01764
moaC		cyclic pyranopterin monophosphate synthase MoaC	4	4	1	1	855				494	494	494	34e9a6678acca924fbf24c6bf5608d56_4686	455a00a194b6732c15d9cd1ede6a821e_4732	8aa1aaefd30e370458343f447b9298d5_4701	S_aureus_12_00680
WP_000584639.1		AAA family ATPase	4	4	1	1	3001				2936	2936	2936	34e9a6678acca924fbf24c6bf5608d56_3789	455a00a194b6732c15d9cd1ede6a821e_3878	8aa1aaefd30e370458343f447b9298d5_3758	S_aureus_12_01939
WP_029264597.1		amino acid permease	4	4	1	1	2497				1454	1454	1454	34e9a6678acca924fbf24c6bf5608d56_2582	455a00a194b6732c15d9cd1ede6a821e_2668	8aa1aaefd30e370458343f447b9298d5_2687	S_aureus_12_02436
fabF		beta-ketoacyl-ACP synthase II	4	4	1	1	1961				1244	1244	1244	34e9a6678acca924fbf24c6bf5608d56_1814	455a00a194b6732c15d9cd1ede6a821e_1867	8aa1aaefd30e370458343f447b9298d5_1942	S_aureus_12_02618
WP_000592291.1		efflux RND transporter permease subunit	4	4	1	1	869				3167	3167	3167	34e9a6678acca924fbf24c6bf5608d56_4658	455a00a194b6732c15d9cd1ede6a821e_4704	8aa1aaefd30e370458343f447b9298d5_4673	S_aureus_12_00667
QOB70711.1		M20 family metallopeptidase	4	4	1	1	1285				1178	1178	1178	34e9a6678acca924fbf24c6bf5608d56_139	455a00a194b6732c15d9cd1ede6a821e_110	8aa1aaefd30e370458343f447b9298d5_276	S_aureus_12_00279
rbsU		ribose transporter RbsU	4	4	1	1	1897				881	881	881	34e9a6678acca924fbf24c6bf5608d56_467	455a00a194b6732c15d9cd1ede6a821e_436	8aa1aaefd30e370458343f447b9298d5_600	S_aureus_12_00122
mhqA_1		VOC family protein	4	4	1	1	338				926	926	926	34e9a6678acca924fbf24c6bf5608d56_613	455a00a194b6732c15d9cd1ede6a821e_609	8aa1aaefd30e370458343f447b9298d5_740	S_aureus_12_00053
garK_1		glycerate kinase	4	4	1	1	691				1142	1142	1142	34e9a6678acca924fbf24c6bf5608d56_5021	455a00a194b6732c15d9cd1ede6a821e_5069	8aa1aaefd30e370458343f447b9298d5_5040	S_aureus_12_00839
WP_000588571.1		APC family permease	4	4	1	1	671				1637	1637	1637	34e9a6678acca924fbf24c6bf5608d56_5061	455a00a194b6732c15d9cd1ede6a821e_5109	8aa1aaefd30e370458343f447b9298d5_5080	S_aureus_12_00857
QOB72762.1		magnesium transporter CorA family protein	4	4	1	1	747				944	944	944	34e9a6678acca924fbf24c6bf5608d56_4905	455a00a194b6732c15d9cd1ede6a821e_4951	8aa1aaefd30e370458343f447b9298d5_4924	S_aureus_12_00785
WP_000202030.1		AbgT family transporter	4	4	1	1	649				1538	1538	1538	34e9a6678acca924fbf24c6bf5608d56_5105	455a00a194b6732c15d9cd1ede6a821e_5149	8aa1aaefd30e370458343f447b9298d5_5124	S_aureus_12_00879
nrtD		ABC transporter ATP-binding protein	4	4	1	1	1848				740	740	740	34e9a6678acca924fbf24c6bf5608d56_273	455a00a194b6732c15d9cd1ede6a821e_244	8aa1aaefd30e370458343f447b9298d5_408	S_aureus_12_00213
lacG		6-phospho-beta-galactosidase	4	4	1	1	2935				1412	1412	1412	34e9a6678acca924fbf24c6bf5608d56_4514	455a00a194b6732c15d9cd1ede6a821e_4557	8aa1aaefd30e370458343f447b9298d5_4533	S_aureus_12_00603
pruA		L-glutamate gamma-semialdehyde dehydrogenase	4	4	1	1	574				1544	1544	1544	34e9a6678acca924fbf24c6bf5608d56_5261	455a00a194b6732c15d9cd1ede6a821e_5303	8aa1aaefd30e370458343f447b9298d5_5284	S_aureus_12_00365
accB		acetyl-CoA carboxylase biotin carboxyl carrier protein	4	4	1	1	1463				464	464	464	34e9a6678acca924fbf24c6bf5608d56_3117	455a00a194b6732c15d9cd1ede6a821e_3188	8aa1aaefd30e370458343f447b9298d5_3091	S_aureus_12_01061
sfaA		staphyloferrin A export MFS transporter	4	4	1	1	2926				1193	1193	1193	34e9a6678acca924fbf24c6bf5608d56_4496	455a00a194b6732c15d9cd1ede6a821e_4539	8aa1aaefd30e370458343f447b9298d5_4515	S_aureus_12_00594
WP_000684154.1		FAD-dependent monooxygenase	4	4	1	1	824				1124	1124	1124	34e9a6678acca924fbf24c6bf5608d56_4748	455a00a194b6732c15d9cd1ede6a821e_4794	8aa1aaefd30e370458343f447b9298d5_4765	S_aureus_12_00710
qorB		SDR family oxidoreductase	4	4	1	1	1209				845	845	845	34e9a6678acca924fbf24c6bf5608d56_735	455a00a194b6732c15d9cd1ede6a821e_777	8aa1aaefd30e370458343f447b9298d5_862	S_aureus_12_02281
WP_000571183.1		ABC transporter ATP-binding protein	4	4	1	1	2551				641	641	641	34e9a6678acca924fbf24c6bf5608d56_1932	455a00a194b6732c15d9cd1ede6a821e_1982	8aa1aaefd30e370458343f447b9298d5_2061	S_aureus_12_01664
frr		ribosome recycling factor	4	4	1	1	1734				554	554	554	34e9a6678acca924fbf24c6bf5608d56_2402	455a00a194b6732c15d9cd1ede6a821e_2452	8aa1aaefd30e370458343f447b9298d5_2533	S_aureus_12_01759
WP_000163826.1		PepSY domain-containing protein	4	4	1	1	81				311	314	311	34e9a6678acca924fbf24c6bf5608d56_3561	455a00a194b6732c15d9cd1ede6a821e_3627	8aa1aaefd30e370458343f447b9298d5_3530	S_aureus_12_01832
WP_000670755.1		fumarylacetoacetate hydrolase family protein	4	4	1	1	2048				902	902	902	34e9a6678acca924fbf24c6bf5608d56_1782	455a00a194b6732c15d9cd1ede6a821e_1835	8aa1aaefd30e370458343f447b9298d5_1910	S_aureus_12_01189
rsgA		ribosome small subunit-dependent GTPase A	4	4	1	1	1695				875	875	875	34e9a6678acca924fbf24c6bf5608d56_2322	455a00a194b6732c15d9cd1ede6a821e_2372	8aa1aaefd30e370458343f447b9298d5_2453	S_aureus_12_01797
asp3		accessory Sec system protein Asp3	4	4	1	1	474				959	959	959	34e9a6678acca924fbf24c6bf5608d56_5467	455a00a194b6732c15d9cd1ede6a821e_5510	8aa1aaefd30e370458343f447b9298d5_5488	S_aureus_12_00458
WP_000287265.1		competence protein ComK	4	4	1	1	2542				569	569	569	34e9a6678acca924fbf24c6bf5608d56_1914	455a00a194b6732c15d9cd1ede6a821e_1964	8aa1aaefd30e370458343f447b9298d5_2041	S_aureus_12_01671
coaBC		bifunctional phosphopantothenoylcysteine decarboxylase/phosphopantothenate--cysteine ligase CoaBC	4	4	1	1	1805				1199	1199	1199	34e9a6678acca924fbf24c6bf5608d56_2302	455a00a194b6732c15d9cd1ede6a821e_2352	8aa1aaefd30e370458343f447b9298d5_2433	S_aureus_12_01807
WP_000688538.1		hypothetical protein	4	4	1	1	2809				416	416	416	34e9a6678acca924fbf24c6bf5608d56_4212	455a00a194b6732c15d9cd1ede6a821e_4256	8aa1aaefd30e370458343f447b9298d5_4234	S_aureus_12_02357
QOB72526.1		ATP-grasp domain-containing protein	4	4	1	1	2880				1193	1193	1193	34e9a6678acca924fbf24c6bf5608d56_4375	455a00a194b6732c15d9cd1ede6a821e_4416	8aa1aaefd30e370458343f447b9298d5_4396	S_aureus_12_02027
QOB71280.1		siderophore ABC transporter substrate-binding protein	4	4	1	1	2300				1028	1028	1028	34e9a6678acca924fbf24c6bf5608d56_1449	455a00a194b6732c15d9cd1ede6a821e_1552	8aa1aaefd30e370458343f447b9298d5_1581	S_aureus_12_01349
QOB71565.1		2-oxo acid dehydrogenase subunit E2	4	4	1	1	2607				1292	1292	1292	34e9a6678acca924fbf24c6bf5608d56_2063	455a00a194b6732c15d9cd1ede6a821e_2113	8aa1aaefd30e370458343f447b9298d5_2194	S_aureus_12_01602
WP_000683920.1		Nif3-like dinuclear metal center hexameric protein	4	4	1	1	1431				1100	1100	1100	34e9a6678acca924fbf24c6bf5608d56_3182	455a00a194b6732c15d9cd1ede6a821e_3253	8aa1aaefd30e370458343f447b9298d5_3156	S_aureus_12_01091
cntM		staphylopine dehydrogenase CntM	4	4	1	1	654				1301	1301	1301	34e9a6678acca924fbf24c6bf5608d56_5095	455a00a194b6732c15d9cd1ede6a821e_5139	8aa1aaefd30e370458343f447b9298d5_5114	S_aureus_12_00874
mutS		DNA mismatch repair protein MutS	4	4	1	1	1770				2618	2618	2618	34e9a6678acca924fbf24c6bf5608d56_2474	455a00a194b6732c15d9cd1ede6a821e_2524	8aa1aaefd30e370458343f447b9298d5_2605	S_aureus_12_01723
WP_001066551.1		MFS transporter	4	4	1	1	1894				1376	1376	1376	34e9a6678acca924fbf24c6bf5608d56_475	455a00a194b6732c15d9cd1ede6a821e_444	8aa1aaefd30e370458343f447b9298d5_608	S_aureus_12_00119
WP_001008395.1		acyl--CoA ligase	4	4	1	1	1937				1505	1505	1505	34e9a6678acca924fbf24c6bf5608d56_385	455a00a194b6732c15d9cd1ede6a821e_354	8aa1aaefd30e370458343f447b9298d5_518	S_aureus_12_00160
sspB		cysteine protease staphopain B	4	4	1	1	2567				1181	1181	1181	34e9a6678acca924fbf24c6bf5608d56_1964	455a00a194b6732c15d9cd1ede6a821e_2014	8aa1aaefd30e370458343f447b9298d5_2093	S_aureus_12_01650
WP_000009408.1		ABC transporter permease	4	4	1	1	1154				1889	1889	1889	34e9a6678acca924fbf24c6bf5608d56_1293	455a00a194b6732c15d9cd1ede6a821e_1330	8aa1aaefd30e370458343f447b9298d5_1427	S_aureus_12_01423
graS		histidine kinase GraS/ApsS	4	4	1	1	1152				1040	1040	1040	34e9a6678acca924fbf24c6bf5608d56_1289	455a00a194b6732c15d9cd1ede6a821e_1326	8aa1aaefd30e370458343f447b9298d5_1423	S_aureus_12_01425
WP_000450554.1		heptaprenyl diphosphate synthase component 1	4	4	1	1	1637				572	572	572	34e9a6678acca924fbf24c6bf5608d56_2862	455a00a194b6732c15d9cd1ede6a821e_2947	8aa1aaefd30e370458343f447b9298d5_2966	S_aureus_12_00933
mfd		transcription-repair coupling factor	4	4	1	1	2690				3506	3506	3506	34e9a6678acca924fbf24c6bf5608d56_916	455a00a194b6732c15d9cd1ede6a821e_962	8aa1aaefd30e370458343f447b9298d5_1047	S_aureus_12_02527
modB		molybdate ABC transporter permease subunit	4	4	1	1	851				671	671	671	34e9a6678acca924fbf24c6bf5608d56_4694	455a00a194b6732c15d9cd1ede6a821e_4740	8aa1aaefd30e370458343f447b9298d5_4709	S_aureus_12_00684
WP_000381275.1		MFS transporter	4	4	1	1	679				1400	1400	1400	34e9a6678acca924fbf24c6bf5608d56_5045	455a00a194b6732c15d9cd1ede6a821e_5093	8aa1aaefd30e370458343f447b9298d5_5064	S_aureus_12_00851
czcD_1		cation diffusion facilitator family transporter	4	4	1	1	1845				959	959	959	34e9a6678acca924fbf24c6bf5608d56_267	455a00a194b6732c15d9cd1ede6a821e_238	8aa1aaefd30e370458343f447b9298d5_402	S_aureus_12_00216
WP_001229922.1		ABC transporter ATP-binding protein	4	4	1	1	769				665	665	665	34e9a6678acca924fbf24c6bf5608d56_4861	455a00a194b6732c15d9cd1ede6a821e_4907	8aa1aaefd30e370458343f447b9298d5_4880	S_aureus_12_00764
WP_000370134.1		RNA-binding transcriptional accessory protein	4	4	1	1	2811				2138	2150	2147	34e9a6678acca924fbf24c6bf5608d56_4234	455a00a194b6732c15d9cd1ede6a821e_4275	8aa1aaefd30e370458343f447b9298d5_4253	S_aureus_12_01959
QOB71752.1		CinA family nicotinamide mononucleotide deamidase-related protein	4	4	1	1	1759				1151	1151	1151	34e9a6678acca924fbf24c6bf5608d56_2452	455a00a194b6732c15d9cd1ede6a821e_2502	8aa1aaefd30e370458343f447b9298d5_2583	S_aureus_12_01734
QOB70735.1		lipopolysaccharide biosynthesis protein	4	4	1	1	1259				1430	1430	1430	34e9a6678acca924fbf24c6bf5608d56_193	455a00a194b6732c15d9cd1ede6a821e_164	8aa1aaefd30e370458343f447b9298d5_330	S_aureus_12_00252
QOB72110.1		A24 family peptidase	4	5	1.25	1	264				167	707	566	34e9a6678acca924fbf24c6bf5608d56_3374 34e9a6678acca924fbf24c6bf5608d56_3378	455a00a194b6732c15d9cd1ede6a821e_3445	8aa1aaefd30e370458343f447b9298d5_3346	S_aureus_12_01183
recN		DNA repair protein RecN	4	4	1	1	1471				1679	1679	1679	34e9a6678acca924fbf24c6bf5608d56_3101	455a00a194b6732c15d9cd1ede6a821e_3172	8aa1aaefd30e370458343f447b9298d5_3075	S_aureus_12_01053
sfaC		staphyloferrin A biosynthesis protein SfaC	4	4	1	1	2924				1070	1070	1070	34e9a6678acca924fbf24c6bf5608d56_4492	455a00a194b6732c15d9cd1ede6a821e_4535	8aa1aaefd30e370458343f447b9298d5_4511	S_aureus_12_00592
WP_000992513.1		DUF445 domain-containing protein	4	4	1	1	3004				1124	1124	1124	34e9a6678acca924fbf24c6bf5608d56_3795	455a00a194b6732c15d9cd1ede6a821e_3884	8aa1aaefd30e370458343f447b9298d5_3764	S_aureus_12_01942
QOB72600.1		putative DNA binding domain-containing protein	4	4	1	1	2959				1436	1436	1436	34e9a6678acca924fbf24c6bf5608d56_4566	455a00a194b6732c15d9cd1ede6a821e_4609	8aa1aaefd30e370458343f447b9298d5_4581	S_aureus_12_00623
cydD		ABC transporter ATP-binding protein/permease	4	4	1	1	2083				1631	1631	1631	34e9a6678acca924fbf24c6bf5608d56_1341	455a00a194b6732c15d9cd1ede6a821e_1444	8aa1aaefd30e370458343f447b9298d5_1475	S_aureus_12_01401
zwf		glucose-6-phosphate dehydrogenase	4	4	1	1	1488				1484	1484	1484	34e9a6678acca924fbf24c6bf5608d56_3065	455a00a194b6732c15d9cd1ede6a821e_3136	8aa1aaefd30e370458343f447b9298d5_3041	S_aureus_12_01036
QOB73095.1		non-ribosomal peptide synthetase	4	4	1	1	1855				7175	7175	7175	34e9a6678acca924fbf24c6bf5608d56_287	455a00a194b6732c15d9cd1ede6a821e_258	8aa1aaefd30e370458343f447b9298d5_422	S_aureus_12_00206
dprA		DNA-processing protein DprA	4	4	1	1	1722				872	872	872	34e9a6678acca924fbf24c6bf5608d56_2378	455a00a194b6732c15d9cd1ede6a821e_2428	8aa1aaefd30e370458343f447b9298d5_2509	S_aureus_12_01769
thiI		tRNA 4-thiouridine(8) synthase ThiI	4	4	1	1	47				1223	1223	1223	34e9a6678acca924fbf24c6bf5608d56_3491	455a00a194b6732c15d9cd1ede6a821e_3557	8aa1aaefd30e370458343f447b9298d5_3458	S_aureus_12_02085
WP_000711497.1		DUF4041 domain-containing protein	4	4	1	1	2977				1346	1346	1346	34e9a6678acca924fbf24c6bf5608d56_3719	455a00a194b6732c15d9cd1ede6a821e_3808	8aa1aaefd30e370458343f447b9298d5_3688	S_aureus_12_01908
QOB71642.1		TDT family transporter	4	4	1	1	2030				947	947	947	34e9a6678acca924fbf24c6bf5608d56_2221	455a00a194b6732c15d9cd1ede6a821e_2271	8aa1aaefd30e370458343f447b9298d5_2352	S_aureus_12_02572
WP_000875613.1		CHAP domain-containing protein	4	4	1	1	585				431	431	431	34e9a6678acca924fbf24c6bf5608d56_5239	455a00a194b6732c15d9cd1ede6a821e_5281	8aa1aaefd30e370458343f447b9298d5_5262	S_aureus_12_00356
WP_000049917.1		biotin--[acetyl-CoA-carboxylase] ligase	4	4	1	1	1651				971	971	971	34e9a6678acca924fbf24c6bf5608d56_2834	455a00a194b6732c15d9cd1ede6a821e_2919	8aa1aaefd30e370458343f447b9298d5_2938	S_aureus_12_00919
bacF		aminotransferase class I/II-fold pyridoxal phosphate-dependent enzyme	4	4	1	1	568				1154	1154	1154	34e9a6678acca924fbf24c6bf5608d56_5273	455a00a194b6732c15d9cd1ede6a821e_5315	8aa1aaefd30e370458343f447b9298d5_5296	S_aureus_12_00371
WP_001286801.1		PH domain-containing protein	4	4	1	1	2820				491	494	491	34e9a6678acca924fbf24c6bf5608d56_4252	455a00a194b6732c15d9cd1ede6a821e_4293	8aa1aaefd30e370458343f447b9298d5_4271	S_aureus_12_01968
WP_029264502.1		acetyl-CoA carboxylase biotin carboxylase subunit	4	4	1	1	215				1361	1361	1361	34e9a6678acca924fbf24c6bf5608d56_3272	455a00a194b6732c15d9cd1ede6a821e_3343	8aa1aaefd30e370458343f447b9298d5_3244	S_aureus_12_01137
QOB70882.1		DUF5085 family protein	4	4	1	1	288				458	458	458	34e9a6678acca924fbf24c6bf5608d56_513	455a00a194b6732c15d9cd1ede6a821e_484	8aa1aaefd30e370458343f447b9298d5_646	S_aureus_12_00100
ribF		riboflavin biosynthesis protein RibF	4	4	1	1	1747				971	971	971	34e9a6678acca924fbf24c6bf5608d56_2428	455a00a194b6732c15d9cd1ede6a821e_2478	8aa1aaefd30e370458343f447b9298d5_2559	S_aureus_12_01746
WP_001109876.1		flavin reductase family protein	4	4	1	1	469				692	692	692	34e9a6678acca924fbf24c6bf5608d56_5477	455a00a194b6732c15d9cd1ede6a821e_5520	8aa1aaefd30e370458343f447b9298d5_5498	S_aureus_12_00463
pmtA		phenol-soluble modulin export ABC transporter ATP-binding protein PmtA	4	4	1	1	1113				896	896	896	34e9a6678acca924fbf24c6bf5608d56_4070	455a00a194b6732c15d9cd1ede6a821e_4156	8aa1aaefd30e370458343f447b9298d5_4036	S_aureus_12_02151
WP_000887007.1		BglG family transcription antiterminator	4	4	1	1	484				1874	1874	1874	34e9a6678acca924fbf24c6bf5608d56_5447	455a00a194b6732c15d9cd1ede6a821e_5487	8aa1aaefd30e370458343f447b9298d5_5468	S_aureus_12_00448
WP_000983330.1		lactose-specific PTS transporter subunit EIIC	4	4	1	1	2936				1712	1712	1712	34e9a6678acca924fbf24c6bf5608d56_4516	455a00a194b6732c15d9cd1ede6a821e_4559	8aa1aaefd30e370458343f447b9298d5_4535	S_aureus_12_00604
dnaB		replicative DNA helicase	4	4	1	1	2149				1400	1400	1400	34e9a6678acca924fbf24c6bf5608d56_35	455a00a194b6732c15d9cd1ede6a821e_35	8aa1aaefd30e370458343f447b9298d5_35	S_aureus_12_00539
rsfS		ribosome silencing factor	4	4	1	1	1399				353	353	353	34e9a6678acca924fbf24c6bf5608d56_3246	455a00a194b6732c15d9cd1ede6a821e_3317	8aa1aaefd30e370458343f447b9298d5_3220	S_aureus_12_01123
infB		translation initiation factor IF-2	4	4	1	1	1744				2117	2117	2117	34e9a6678acca924fbf24c6bf5608d56_2422	455a00a194b6732c15d9cd1ede6a821e_2472	8aa1aaefd30e370458343f447b9298d5_2553	S_aureus_12_01749
WP_000142187.1		acyl-CoA dehydrogenase family protein	4	4	1	1	1938				1211	1211	1211	34e9a6678acca924fbf24c6bf5608d56_383	455a00a194b6732c15d9cd1ede6a821e_352	8aa1aaefd30e370458343f447b9298d5_516	S_aureus_12_00161
bshC		bacillithiol biosynthesis cysteine-adding enzyme BshC	4	4	1	1	1368				1613	1613	1613	34e9a6678acca924fbf24c6bf5608d56_2234	455a00a194b6732c15d9cd1ede6a821e_2284	8aa1aaefd30e370458343f447b9298d5_2365	S_aureus_12_02566
WP_000828572.1		TetR/AcrR family transcriptional regulator	4	4	1	1	775				554	554	554	34e9a6678acca924fbf24c6bf5608d56_4847	455a00a194b6732c15d9cd1ede6a821e_4893	8aa1aaefd30e370458343f447b9298d5_4864	S_aureus_12_00758
WP_001793786.1		acyl CoA:acetate/3-ketoacid CoA transferase	4	4	1	1	1936				1562	1577	1573	34e9a6678acca924fbf24c6bf5608d56_387	455a00a194b6732c15d9cd1ede6a821e_356	8aa1aaefd30e370458343f447b9298d5_520	S_aureus_12_00159
nusB		transcription antitermination factor NusB	4	4	1	1	1466				389	389	389	34e9a6678acca924fbf24c6bf5608d56_3111	455a00a194b6732c15d9cd1ede6a821e_3182	8aa1aaefd30e370458343f447b9298d5_3085	S_aureus_12_01058
mraY		phospho-N-acetylmuramoyl-pentapeptide-transferase	4	4	1	1	1373				965	965	965	34e9a6678acca924fbf24c6bf5608d56_2244	455a00a194b6732c15d9cd1ede6a821e_2294	8aa1aaefd30e370458343f447b9298d5_2375	S_aureus_12_02561
WP_000427776.1		dipeptide ABC transporter ATP-binding protein	4	4	1	1	1309				980	980	980	34e9a6678acca924fbf24c6bf5608d56_1836	455a00a194b6732c15d9cd1ede6a821e_1889	8aa1aaefd30e370458343f447b9298d5_1964	S_aureus_12_02136
galU		UTP--glucose-1-phosphate uridylyltransferase GalU	4	4	1	1	630				866	866	866	34e9a6678acca924fbf24c6bf5608d56_5145	455a00a194b6732c15d9cd1ede6a821e_5189	8aa1aaefd30e370458343f447b9298d5_5166	S_aureus_12_00312
nadE		ammonia-dependent NAD(+) synthetase	4	4	1	1	1091				821	821	821	34e9a6678acca924fbf24c6bf5608d56_4026	455a00a194b6732c15d9cd1ede6a821e_4112	8aa1aaefd30e370458343f447b9298d5_3992	S_aureus_12_02171
WP_029264543.1		amidohydrolase	4	4	1	1	1299				971	971	971	34e9a6678acca924fbf24c6bf5608d56_107	455a00a194b6732c15d9cd1ede6a821e_78	8aa1aaefd30e370458343f447b9298d5_244	S_aureus_12_00295
WP_000127979.1		sensor histidine kinase	4	4	1	1	1891				1547	1556	1553	34e9a6678acca924fbf24c6bf5608d56_359	455a00a194b6732c15d9cd1ede6a821e_330	8aa1aaefd30e370458343f447b9298d5_494	S_aureus_12_00170
WP_000503579.1		glutamate synthase subunit beta	4	4	1	1	2658				1463	1463	1463	34e9a6678acca924fbf24c6bf5608d56_835	455a00a194b6732c15d9cd1ede6a821e_881	8aa1aaefd30e370458343f447b9298d5_966	S_aureus_12_02233
WP_000590809.1		amino acid ABC transporter ATP-binding protein	4	4	1	1	3017				722	728	725	34e9a6678acca924fbf24c6bf5608d56_3817	455a00a194b6732c15d9cd1ede6a821e_3906	8aa1aaefd30e370458343f447b9298d5_3786	S_aureus_12_01953
qoxC		cytochrome aa3 quinol oxidase subunit III	4	4	1	1	2581				605	605	605	34e9a6678acca924fbf24c6bf5608d56_1988	455a00a194b6732c15d9cd1ede6a821e_2038	8aa1aaefd30e370458343f447b9298d5_2117	S_aureus_12_01638
aspS		aspartate--tRNA ligase	4	4	1	1	239				1766	1766	1766	34e9a6678acca924fbf24c6bf5608d56_3323	455a00a194b6732c15d9cd1ede6a821e_3394	8aa1aaefd30e370458343f447b9298d5_3295	S_aureus_12_01160
WP_160200259.1		glyoxalase/bleomycin resistance/extradiol dioxygenase family protein	4	4	1	1	538				449	449	449	34e9a6678acca924fbf24c6bf5608d56_5335	455a00a194b6732c15d9cd1ede6a821e_5377	8aa1aaefd30e370458343f447b9298d5_5358	S_aureus_12_00401
rsp		AraC family transcriptional regulator Rsp	4	4	1	1	744				2105	2105	2105	34e9a6678acca924fbf24c6bf5608d56_4911	455a00a194b6732c15d9cd1ede6a821e_4957	8aa1aaefd30e370458343f447b9298d5_4930	S_aureus_12_00788
WP_000862542.1		4'-phosphopantetheinyl transferase superfamily protein	4	4	1	1	1856				644	644	644	34e9a6678acca924fbf24c6bf5608d56_289	455a00a194b6732c15d9cd1ede6a821e_260	8aa1aaefd30e370458343f447b9298d5_424	S_aureus_12_00205
WP_000467992.1		ABC transporter permease	4	4	1	1	2648				659	659	659	34e9a6678acca924fbf24c6bf5608d56_815	455a00a194b6732c15d9cd1ede6a821e_861	8aa1aaefd30e370458343f447b9298d5_946	S_aureus_12_02243
WP_001208900.1		FKLRK protein	4	4	1	1	1196				1487	1487	1487	34e9a6678acca924fbf24c6bf5608d56_761	455a00a194b6732c15d9cd1ede6a821e_803	8aa1aaefd30e370458343f447b9298d5_888	S_aureus_12_02269
WP_000848304.1		U32 family peptidase	4	4	1	1	221				1268	1268	1268	34e9a6678acca924fbf24c6bf5608d56_3284	455a00a194b6732c15d9cd1ede6a821e_3355	8aa1aaefd30e370458343f447b9298d5_3256	S_aureus_12_01143
pyrC		dihydroorotase	4	4	1	1	1815				1274	1277	1274	34e9a6678acca924fbf24c6bf5608d56_2282	455a00a194b6732c15d9cd1ede6a821e_2332	8aa1aaefd30e370458343f447b9298d5_2413	S_aureus_12_01817
WP_001058583.1		bifunctional (p)ppGpp synthetase/guanosine-3',5'-bis(diphosphate) 3'-pyrophosphohydrolase	4	4	1	1	243				2189	2210	2194	34e9a6678acca924fbf24c6bf5608d56_3331	455a00a194b6732c15d9cd1ede6a821e_3402	8aa1aaefd30e370458343f447b9298d5_3303	S_aureus_12_01164
WP_160200208.1		DUF3169 family protein	4	4	1	1	325				713	713	713	34e9a6678acca924fbf24c6bf5608d56_637	455a00a194b6732c15d9cd1ede6a821e_633	8aa1aaefd30e370458343f447b9298d5_764	S_aureus_12_00040
WP_000477997.1		MurR/RpiR family transcriptional regulator	4	4	1	1	805				764	764	764	34e9a6678acca924fbf24c6bf5608d56_4786	455a00a194b6732c15d9cd1ede6a821e_4832	8aa1aaefd30e370458343f447b9298d5_4803	S_aureus_12_00729
WP_016186848.1		MetQ/NlpA family ABC transporter substrate-binding protein	4	4	1	1	2431				821	821	821	34e9a6678acca924fbf24c6bf5608d56_1614	455a00a194b6732c15d9cd1ede6a821e_1717	8aa1aaefd30e370458343f447b9298d5_1792	S_aureus_12_01246
WP_001177832.1		prephenate dehydratase	4	4	1	1	1094				794	794	794	34e9a6678acca924fbf24c6bf5608d56_4032	455a00a194b6732c15d9cd1ede6a821e_4118	8aa1aaefd30e370458343f447b9298d5_3998	S_aureus_12_02168
lysS		lysine--tRNA ligase	4	4	1	1	2705				1487	1487	1487	34e9a6678acca924fbf24c6bf5608d56_946	455a00a194b6732c15d9cd1ede6a821e_992	8aa1aaefd30e370458343f447b9298d5_1077	S_aureus_12_02513
tarS		poly(ribitol-phosphate) beta-N-acetylglucosaminyltransferase	4	4	1	1	1911				1724	1724	1724	34e9a6678acca924fbf24c6bf5608d56_439	455a00a194b6732c15d9cd1ede6a821e_408	8aa1aaefd30e370458343f447b9298d5_572	S_aureus_12_00135
WP_000379102.1		metal-dependent hydrolase	4	4	1	1	1044				977	977	977	34e9a6678acca924fbf24c6bf5608d56_3932	455a00a194b6732c15d9cd1ede6a821e_4018	8aa1aaefd30e370458343f447b9298d5_3898	S_aureus_12_02215
bcp		thioredoxin-dependent thiol peroxidase	4	4	1	1	3013				455	455	455	34e9a6678acca924fbf24c6bf5608d56_3920	455a00a194b6732c15d9cd1ede6a821e_4006	8aa1aaefd30e370458343f447b9298d5_3886	S_aureus_12_02221
WP_001196351.1		proline dehydrogenase	4	4	1	1	165				1001	1001	1001	34e9a6678acca924fbf24c6bf5608d56_3599	455a00a194b6732c15d9cd1ede6a821e_3677	8aa1aaefd30e370458343f447b9298d5_3568	S_aureus_12_01851
WP_001031880.1		L-lactate dehydrogenase	4	4	1	1	1928				953	953	953	34e9a6678acca924fbf24c6bf5608d56_403	455a00a194b6732c15d9cd1ede6a821e_372	8aa1aaefd30e370458343f447b9298d5_536	S_aureus_12_00152
yitJ		bifunctional homocysteine S-methyltransferase/methylenetetrahydrofolate reductase	4	4	1	1	318				1841	1841	1841	34e9a6678acca924fbf24c6bf5608d56_651	455a00a194b6732c15d9cd1ede6a821e_647	8aa1aaefd30e370458343f447b9298d5_778	S_aureus_12_00033
WP_000769147.1		superantigen-like protein SSL11	4	4	1	1	1197				698	698	698	34e9a6678acca924fbf24c6bf5608d56_759	455a00a194b6732c15d9cd1ede6a821e_801	8aa1aaefd30e370458343f447b9298d5_886	S_aureus_12_02270
trmFO		methylenetetrahydrofolate--tRNA-(uracil(54)-C(5))-methyltransferase (FADH(2)-oxidizing) TrmFO	4	4	1	1	1724				1307	1307	1307	34e9a6678acca924fbf24c6bf5608d56_2382	455a00a194b6732c15d9cd1ede6a821e_2432	8aa1aaefd30e370458343f447b9298d5_2513	S_aureus_12_01767
WP_000034978.1		maltodextrin ABC transporter substrate-binding protein	4	4	1	1	1882				1271	1271	1271	34e9a6678acca924fbf24c6bf5608d56_341	455a00a194b6732c15d9cd1ede6a821e_312	8aa1aaefd30e370458343f447b9298d5_476	S_aureus_12_00179
WP_000029542.1		GNAT family N-acetyltransferase	4	4	1	1	875				887	887	887	34e9a6678acca924fbf24c6bf5608d56_4646	455a00a194b6732c15d9cd1ede6a821e_4692	8aa1aaefd30e370458343f447b9298d5_4661	S_aureus_12_00662
alsS		acetolactate synthase AlsS	4	4	1	1	2955				1664	1664	1664	34e9a6678acca924fbf24c6bf5608d56_4556	455a00a194b6732c15d9cd1ede6a821e_4599	8aa1aaefd30e370458343f447b9298d5_4573	S_aureus_12_00622
glnA		type I glutamate--ammonia ligase	4	4	1	1	1783				1340	1340	1340	34e9a6678acca924fbf24c6bf5608d56_2500	455a00a194b6732c15d9cd1ede6a821e_2550	8aa1aaefd30e370458343f447b9298d5_2631	S_aureus_12_01710
sapep		Mn(2+)-dependent dipeptidase Sapep	4	4	1	1	151				1409	1409	1409	34e9a6678acca924fbf24c6bf5608d56_3571	455a00a194b6732c15d9cd1ede6a821e_3649	8aa1aaefd30e370458343f447b9298d5_3540	S_aureus_12_01837
WP_000999130.1		multidrug effflux MFS transporter	4	4	1	1	773				1208	1208	1208	34e9a6678acca924fbf24c6bf5608d56_4851	455a00a194b6732c15d9cd1ede6a821e_4897	8aa1aaefd30e370458343f447b9298d5_4870	S_aureus_12_00760
WP_029264569.1		hypothetical protein	4	4	1	1	2895				1091	1091	1091	34e9a6678acca924fbf24c6bf5608d56_4405	455a00a194b6732c15d9cd1ede6a821e_4446	8aa1aaefd30e370458343f447b9298d5_4426	S_aureus_12_02042
cvfB		RNA-binding virulence regulatory protein CvfB	4	4	1	1	1999				902	902	902	34e9a6678acca924fbf24c6bf5608d56_2700	455a00a194b6732c15d9cd1ede6a821e_2786	8aa1aaefd30e370458343f447b9298d5_2805	S_aureus_12_02385
WP_000368902.1		ACT domain-containing protein	4	4	1	1	252				455	458	455	34e9a6678acca924fbf24c6bf5608d56_3349	455a00a194b6732c15d9cd1ede6a821e_3420	8aa1aaefd30e370458343f447b9298d5_3321	S_aureus_12_01173
treP		PTS system trehalose-specific EIIBC component	4	4	1	1	2659				1427	1427	1427	34e9a6678acca924fbf24c6bf5608d56_840	455a00a194b6732c15d9cd1ede6a821e_886	8aa1aaefd30e370458343f447b9298d5_971	S_aureus_12_02231
WP_000622698.1		low specificity L-threonine aldolase	4	4	1	1	2479				1025	1025	1025	34e9a6678acca924fbf24c6bf5608d56_2546	455a00a194b6732c15d9cd1ede6a821e_2632	8aa1aaefd30e370458343f447b9298d5_2651	S_aureus_12_02419
WP_000809522.1		pyruvate carboxylase	4	4	1	1	2202				3452	3452	3452	34e9a6678acca924fbf24c6bf5608d56_2101	455a00a194b6732c15d9cd1ede6a821e_2151	8aa1aaefd30e370458343f447b9298d5_2232	S_aureus_12_01584
WP_000266096.1		alpha/beta hydrolase	4	4	1	1	163				827	827	827	34e9a6678acca924fbf24c6bf5608d56_3595	455a00a194b6732c15d9cd1ede6a821e_3673	8aa1aaefd30e370458343f447b9298d5_3564	S_aureus_12_01850
QOB72517.1		aldehyde dehydrogenase family protein	4	4	1	1	2870				1427	1427	1427	34e9a6678acca924fbf24c6bf5608d56_4355	455a00a194b6732c15d9cd1ede6a821e_4396	8aa1aaefd30e370458343f447b9298d5_4376	S_aureus_12_02017
arlS		sensor histidine kinase ArlS	4	4	1	1	1976				1355	1355	1355	34e9a6678acca924fbf24c6bf5608d56_2747	455a00a194b6732c15d9cd1ede6a821e_2832	8aa1aaefd30e370458343f447b9298d5_2851	S_aureus_12_02408
WP_001174260.1		YpdA family putative bacillithiol disulfide reductase	4	4	1	1	1628				986	986	986	34e9a6678acca924fbf24c6bf5608d56_2880	455a00a194b6732c15d9cd1ede6a821e_2965	8aa1aaefd30e370458343f447b9298d5_2984	S_aureus_12_00940
QOB71833.1		Y-family DNA polymerase	4	4	1	1	2024				1262	1262	1262	34e9a6678acca924fbf24c6bf5608d56_2648	455a00a194b6732c15d9cd1ede6a821e_2734	8aa1aaefd30e370458343f447b9298d5_2753	S_aureus_12_02360
WP_001030080.1		glycine--tRNA ligase	4	4	1	1	1425				1391	1391	1391	34e9a6678acca924fbf24c6bf5608d56_3194	455a00a194b6732c15d9cd1ede6a821e_3265	8aa1aaefd30e370458343f447b9298d5_3168	S_aureus_12_01097
WP_001242307.1		pyrimidine-nucleoside phosphorylase	4	4	1	1	2884				1301	1301	1301	34e9a6678acca924fbf24c6bf5608d56_4383	455a00a194b6732c15d9cd1ede6a821e_4424	8aa1aaefd30e370458343f447b9298d5_4404	S_aureus_12_02031
splF		serine protease SplF	4	4	1	1	2970				719	719	719	34e9a6678acca924fbf24c6bf5608d56_3703	455a00a194b6732c15d9cd1ede6a821e_3792	8aa1aaefd30e370458343f447b9298d5_3672	S_aureus_12_01900
WP_000082568.1		SMP-30/gluconolactonase/LRE family protein	4	4	1	1	436				971	974	971	34e9a6678acca924fbf24c6bf5608d56_5539	455a00a194b6732c15d9cd1ede6a821e_5582	8aa1aaefd30e370458343f447b9298d5_5564	S_aureus_12_00496
mepA		multidrug efflux MATE transporter MepA	4	4	1	1	341				1355	1355	1355	34e9a6678acca924fbf24c6bf5608d56_607	455a00a194b6732c15d9cd1ede6a821e_603	8aa1aaefd30e370458343f447b9298d5_734	S_aureus_12_00056
nagE		N-acetylglucosamine-specific PTS transporter subunit IIBC	4	4	1	1	58				1466	1466	1466	34e9a6678acca924fbf24c6bf5608d56_3515	455a00a194b6732c15d9cd1ede6a821e_3581	8aa1aaefd30e370458343f447b9298d5_3482	S_aureus_12_02075
cls		cardiolipin synthase	4	4	1	1	2481				1481	1481	1481	34e9a6678acca924fbf24c6bf5608d56_2550	455a00a194b6732c15d9cd1ede6a821e_2636	8aa1aaefd30e370458343f447b9298d5_2655	S_aureus_12_02421
cap8I		type 8 capsular polysaccharide synthesis protein Cap8I	4	4	1	1	1834				1394	1394	1394	34e9a6678acca924fbf24c6bf5608d56_245	455a00a194b6732c15d9cd1ede6a821e_216	8aa1aaefd30e370458343f447b9298d5_380	S_aureus_12_00227
WP_000948990.1		ABC transporter ATP-binding protein	4	4	1	1	675				1226	1226	1226	34e9a6678acca924fbf24c6bf5608d56_5053	455a00a194b6732c15d9cd1ede6a821e_5101	8aa1aaefd30e370458343f447b9298d5_5072	S_aureus_12_00855
WP_001794121.1		ABC transporter ATP-binding protein	4	4	1	1	2482				899	908	905	34e9a6678acca924fbf24c6bf5608d56_2552	455a00a194b6732c15d9cd1ede6a821e_2638	8aa1aaefd30e370458343f447b9298d5_2657	S_aureus_12_02422
QOB70832.1		nucleoside hydrolase	4	4	1	1	1926				935	935	935	34e9a6678acca924fbf24c6bf5608d56_407	455a00a194b6732c15d9cd1ede6a821e_376	8aa1aaefd30e370458343f447b9298d5_540	S_aureus_12_00150
WP_000130451.1		inositol monophosphatase	4	4	1	1	818				797	797	797	34e9a6678acca924fbf24c6bf5608d56_4760	455a00a194b6732c15d9cd1ede6a821e_4806	8aa1aaefd30e370458343f447b9298d5_4777	S_aureus_12_00716
rpoC		DNA-directed RNA polymerase subunit beta'	4	4	1	1	2737				3596	3623	3602	34e9a6678acca924fbf24c6bf5608d56_1049	455a00a194b6732c15d9cd1ede6a821e_1090	8aa1aaefd30e370458343f447b9298d5_1185	S_aureus_12_01542
mroQ		CPBP family intramembrane metalloprotease MroQ	4	4	1	1	2776				743	743	743	34e9a6678acca924fbf24c6bf5608d56_4146	455a00a194b6732c15d9cd1ede6a821e_4190	8aa1aaefd30e370458343f447b9298d5_4168	S_aureus_12_02326
WP_001125631.1		amidase domain-containing protein	4	4	1	1	480				1859	1859	1859	34e9a6678acca924fbf24c6bf5608d56_5455	455a00a194b6732c15d9cd1ede6a821e_5495	8aa1aaefd30e370458343f447b9298d5_5476	S_aureus_12_00452
WP_000149503.1		protein arginine kinase	4	4	1	1	2757				1007	1010	1007	34e9a6678acca924fbf24c6bf5608d56_1008	455a00a194b6732c15d9cd1ede6a821e_1049	8aa1aaefd30e370458343f447b9298d5_1142	S_aureus_12_01561
WP_000138487.1		Glu/Leu/Phe/Val dehydrogenase	4	4	1	1	2038				1244	1244	1244	34e9a6678acca924fbf24c6bf5608d56_1762	455a00a194b6732c15d9cd1ede6a821e_1815	8aa1aaefd30e370458343f447b9298d5_1890	S_aureus_12_01199
WP_160200214.1		MFS transporter	4	4	1	1	2708				1400	1400	1400	34e9a6678acca924fbf24c6bf5608d56_1109	455a00a194b6732c15d9cd1ede6a821e_1148	8aa1aaefd30e370458343f447b9298d5_1245	S_aureus_12_01512
WP_000278556.1		NarK/NasA family nitrate transporter	4	4	1	1	737				1169	1169	1169	34e9a6678acca924fbf24c6bf5608d56_4925	455a00a194b6732c15d9cd1ede6a821e_4973	8aa1aaefd30e370458343f447b9298d5_4944	S_aureus_12_00795
QOB70804.1		sugar ABC transporter permease	4	4	1	1	1883				1268	1268	1268	34e9a6678acca924fbf24c6bf5608d56_343	455a00a194b6732c15d9cd1ede6a821e_314	8aa1aaefd30e370458343f447b9298d5_478	S_aureus_12_00178
WP_000681744.1		asparaginase	4	4	1	1	1629				968	968	968	34e9a6678acca924fbf24c6bf5608d56_2878	455a00a194b6732c15d9cd1ede6a821e_2963	8aa1aaefd30e370458343f447b9298d5_2982	S_aureus_12_00939
WP_001183986.1		acetoin utilization protein AcuC	4	5	1.25	1	68				464	1169	927	34e9a6678acca924fbf24c6bf5608d56_3535	455a00a194b6732c15d9cd1ede6a821e_3601	8aa1aaefd30e370458343f447b9298d5_3502	S_aureus_12_02066 S_aureus_12_02065
WP_000764425.1		class I SAM-dependent methyltransferase	4	4	1	1	161				563	563	563	34e9a6678acca924fbf24c6bf5608d56_3591	455a00a194b6732c15d9cd1ede6a821e_3669	8aa1aaefd30e370458343f447b9298d5_3560	S_aureus_12_01848
WP_001081338.1		ABC transporter substrate-binding protein	4	4	1	1	2556				959	959	959	34e9a6678acca924fbf24c6bf5608d56_1942	455a00a194b6732c15d9cd1ede6a821e_1992	8aa1aaefd30e370458343f447b9298d5_2071	S_aureus_12_01660
WP_000701500.1		DUF5079 family protein	4	4	1	1	286				644	644	644	34e9a6678acca924fbf24c6bf5608d56_509	455a00a194b6732c15d9cd1ede6a821e_480	8aa1aaefd30e370458343f447b9298d5_642	S_aureus_12_00102
WP_000677261.1		NAD(P)H-dependent oxidoreductase	4	4	1	1	2720				566	566	566	34e9a6678acca924fbf24c6bf5608d56_1083	455a00a194b6732c15d9cd1ede6a821e_1124	8aa1aaefd30e370458343f447b9298d5_1219	S_aureus_12_01525
metN		methionine ABC transporter ATP-binding protein	4	4	1	1	2647				1025	1025	1025	34e9a6678acca924fbf24c6bf5608d56_813	455a00a194b6732c15d9cd1ede6a821e_859	8aa1aaefd30e370458343f447b9298d5_944	S_aureus_12_02244
QOB71172.1		sodium:proton antiporter	4	4	1	1	1335				2042	2042	2042	34e9a6678acca924fbf24c6bf5608d56_1225	455a00a194b6732c15d9cd1ede6a821e_1262	8aa1aaefd30e370458343f447b9298d5_1359	S_aureus_12_01456
priA		primosomal protein N'	4	4	1	1	1804				2408	2408	2408	34e9a6678acca924fbf24c6bf5608d56_2304	455a00a194b6732c15d9cd1ede6a821e_2354	8aa1aaefd30e370458343f447b9298d5_2435	S_aureus_12_01806
rbsD		D-ribose pyranase	4	4	1	1	1898				404	404	404	34e9a6678acca924fbf24c6bf5608d56_465	455a00a194b6732c15d9cd1ede6a821e_434	8aa1aaefd30e370458343f447b9298d5_598	S_aureus_12_00123
gdpP		cyclic-di-AMP phosphodiesterase GdpP	4	4	1	1	2147				1967	1967	1967	34e9a6678acca924fbf24c6bf5608d56_31	455a00a194b6732c15d9cd1ede6a821e_31	8aa1aaefd30e370458343f447b9298d5_31	S_aureus_12_00537
arcC		carbamate kinase	4	4	1	1	2033				932	935	932	34e9a6678acca924fbf24c6bf5608d56_2215	455a00a194b6732c15d9cd1ede6a821e_2265	8aa1aaefd30e370458343f447b9298d5_2346	S_aureus_12_02575
WP_001068491.1		DMT family transporter	4	4	1	1	2293				866	866	866	34e9a6678acca924fbf24c6bf5608d56_1435	455a00a194b6732c15d9cd1ede6a821e_1538	8aa1aaefd30e370458343f447b9298d5_1567	S_aureus_12_01356
WP_001060545.1		hypothetical protein	4	4	1	1	2530				725	725	725	34e9a6678acca924fbf24c6bf5608d56_1883	455a00a194b6732c15d9cd1ede6a821e_1934	8aa1aaefd30e370458343f447b9298d5_2011	S_aureus_12_01685
[truncated: 1,111 more rows]

## Sheet: Column Info
Column	Column Name	Description
[truncated: 14 more rows]
