# Supplementary material for: Comparative De Novo and Pan-Genome Analysis of MDR Nosocomial Bacteria Isolated from Hospitals in Jeddah, Saudi Arabia
Source: MDPI journal article supplement (doi:10.3390/microorganisms11102432), 2023-09-28
Supplement: s1 [file Table S8 Antibiotics-resistant bacteria.xls]

## Sheet: E_coli_7
#FILE	SEQUENCE	START	END	STRAND	GENE	COVERAGE	COVERAGE_MAP	GAPS	%COVERAGE	%IDENTITY	DATABASE	ACCESSION	PRODUCT	RESISTANCE
E_coli_7.fasta	contig1	35825	39418	-	EVGS	1-3594/3594	===============	0/0	100	98.92	megares	MEG_2870	Multi-compound:Drug_and_biocide_resistance:Drug_and_biocide_MFS_efflux_regulator:EVGS
E_coli_7.fasta	contig1	40453	41616	+	EMRK	1-1164/1164	===============	0/0	100	99.74	megares	MEG_2732	Multi-compound:Drug_and_biocide_resistance:Drug_and_biocide_MFS_efflux_pumps:EMRK
E_coli_7.fasta	contig1	41616	43154	+	EMRY	1-1539/1539	===============	0/0	100	99.28	megares	MEG_2736	Multi-compound:Drug_and_biocide_resistance:Drug_and_biocide_MFS_efflux_pumps:EMRY
E_coli_7.fasta	contig1	151700	152668	-	PMRF	1-969/969	===============	0/0	100	99.69	megares	MEG_5801	Drugs:Cationic_antimicrobial_peptides:Lipid_A_modification:PMRF
E_coli_7.fasta	contig1	195667	196797	+	KPNO	1-1098/1098	========/======	12/41	99.64	80.09	megares	MEG_3516	Multi-compound:Drug_and_biocide_resistance:Drug_and_biocide_SMR_efflux_pumps:KPNO
E_coli_7.fasta	contig1	199828	201471	+	YOGI	1-1644/1644	===============	0/0	100	98.05	megares	MEG_7842	Multi-compound:Drug_and_biocide_resistance:Drug_and_biocide_ABC_efflux_pumps:YOGI
E_coli_7.fasta	contig1	226969	228159	+	BCR	1-1191/1191	===============	0/0	100	98.24	megares	MEG_1210	Multi-compound:Drug_and_biocide_resistance:Drug_and_biocide_MFS_efflux_pumps:BCR
E_coli_7.fasta	contig1	344425	345147	-	BAER	1-723/723	===============	0/0	100	99.45	megares	MEG_1192	Multi-compound:Drug_and_biocide_and_metal_resistance:Drug_and_biocide_and_metal_RND_efflux_regulator:BAER
E_coli_7.fasta	contig1	345144	346547	-	BAES	1-1404/1404	===============	0/0	100	98.72	megares	MEG_1193	Multi-compound:Drug_and_biocide_and_metal_resistance:Drug_and_biocide_and_metal_RND_efflux_regulator:BAES
E_coli_7.fasta	contig1	347960	351037	-	MDTC	1-3078/3078	===============	0/0	100	97.89	megares	MEG_3749	Multi-compound:Drug_and_biocide_and_metal_resistance:Drug_and_biocide_and_metal_RND_efflux_pumps:MDTC
E_coli_7.fasta	contig1	351038	354160	-	MDTB	1-3123/3123	===============	0/0	100	98.72	megares	MEG_3747	Multi-compound:Drug_and_biocide_and_metal_resistance:Drug_and_biocide_and_metal_RND_efflux_pumps:MDTB
E_coli_7.fasta	contig1	354160	355407	-	MDTA	1-1248/1248	===============	0/0	100	98	megares	MEG_3746	Multi-compound:Drug_and_biocide_and_metal_resistance:Drug_and_biocide_and_metal_RND_efflux_pumps:MDTA
E_coli_7.fasta	contig1	367342	369194	+	ASMA	1-1853/1854	===============	0/0	99.95	98.27	megares	MEG_1180	Drugs:Multi-drug_resistance:Multi-drug_RND_efflux_regulator:ASMA
E_coli_7.fasta	contig1	410342	411508	+	UGD	1-1167/1167	===============	0/0	100	95.03	megares	MEG_7328	Drugs:Cationic_antimicrobial_peptides:Lipid_A_modification:UGD
E_coli_7.fasta	contig1	792906	794279	-	MDTK	1-1374/1374	===============	0/0	100	99.13	megares	MEG_3759	Multi-compound:Drug_and_biocide_resistance:Drug_and_biocide_MATE_efflux_pumps:MDTK
E_coli_7.fasta	contig1	863947	864312	+	MDTJ	1-366/366	===============	0/0	100	99.73	megares	MEG_3757	Multi-compound:Drug_and_biocide_resistance:Drug_and_biocide_SMR_efflux_pumps:MDTJ
E_coli_7.fasta	contig1	864299	864628	+	MDTI	1-330/330	===============	0/0	100	99.39	megares	MEG_3756	Multi-compound:Drug_and_biocide_resistance:Drug_and_biocide_SMR_efflux_pumps:MDTI
E_coli_7.fasta	contig1	903273	903662	-	MARA	1-390/390	===============	0/0	100	99.49	megares	MEG_3662	Multi-compound:Drug_and_biocide_resistance:Drug_and_biocide_RND_efflux_regulator:MARA
E_coli_7.fasta	contig1	903676	904110	-	MARR	1-435/435	===============	0/0	100	97.7	megares	MEG_3663	Multi-compound:Drug_and_biocide_resistance:Drug_and_biocide_RND_efflux_regulator:MARR
E_coli_7.fasta	contig10	134647	136395	-	MSBA	1-1749/1749	===============	0/0	100	98.86	megares	MEG_4061	Drugs:Multi-drug_resistance:Multi-drug_ABC_efflux_pumps:MSBA
E_coli_7.fasta	contig11	152131	153363	+	MDFA	1-1233/1233	===============	0/0	100	98.46	megares	MEG_3737	Multi-compound:Drug_and_biocide_resistance:Drug_and_biocide_MFS_efflux_pumps:MDFA
E_coli_7.fasta	contig12	113668	114144	-	MPHB	1-477/477	===============	0/0	100	97.9	megares	MEG_4033	Drugs:MLS:Macrolide_phosphotransferases:MPHB
E_coli_7.fasta	contig12	135383	138496	-	ACRD	1-3114/3114	===============	0/0	100	98.91	megares	MEG_407	Multi-compound:Drug_and_biocide_and_metal_resistance:Drug_and_biocide_and_metal_RND_efflux_pumps:ACRD
E_coli_7.fasta	contig13	137286	137948	-	ACRS	1-663/663	===============	0/0	100	98.94	megares	MEG_415	Multi-compound:Drug_and_biocide_resistance:Drug_and_biocide_RND_efflux_regulator:ACRS
E_coli_7.fasta	contig13	138347	139504	+	ACRE	1-1158/1158	===============	0/0	100	98.79	megares	MEG_408	Multi-compound:Drug_and_biocide_resistance:Drug_and_biocide_RND_efflux_pumps:ACRE
E_coli_7.fasta	contig13	139516	142620	+	ACRF	1-3105/3105	===============	0/0	100	98.91	megares	MEG_409	Multi-compound:Drug_and_biocide_resistance:Drug_and_biocide_RND_efflux_pumps:ACRF
E_coli_7.fasta	contig14	128442	129650	+	MDTH	1-1209/1209	===============	0/0	100	98.43	megares	MEG_3755	Multi-compound:Drug_and_biocide_resistance:Drug_and_biocide_MFS_efflux_pumps:MDTH
E_coli_7.fasta	contig14	138281	139507	+	MDTG	1-1227/1227	===============	0/0	100	100	megares	MEG_3754	Multi-compound:Drug_and_biocide_resistance:Drug_and_biocide_MFS_efflux_pumps:MDTG
E_coli_7.fasta	contig15	70923	71742	+	BACA	1-820/822	===============	0/0	99.76	98.66	megares	MEG_1189	Drugs:Bacitracin:Undecaprenyl_pyrophosphate_phosphatase:BACA
E_coli_7.fasta	contig16	61211	62584	-	CPXAR	1-1374/1374	===============	0/0	100	97.96	megares	MEG_2121	Multi-compound:Drug_and_biocide_resistance:Drug_and_biocide_RND_efflux_regulator:CPXAR
E_coli_7.fasta	contig16	62581	63279	-	CPXAR	1-699/699	===============	0/0	100	99.14	megares	MEG_2118	Multi-compound:Drug_and_biocide_resistance:Drug_and_biocide_RND_efflux_regulator:CPXAR
E_coli_7.fasta	contig19	2653	3927	+	TETA	1-1275/1275	===============	0/0	100	99.92	megares	MEG_7024	Drugs:Tetracyclines:Tetracycline_resistance_MFS_efflux_pumps:TETA
E_coli_7.fasta	contig2	85784	87016	-	MDTM	1-1233/1233	===============	0/0	100	96.43	megares	MEG_3761	Multi-compound:Drug_and_biocide_resistance:Drug_and_biocide_MFS_efflux_pumps:MDTM
E_coli_7.fasta	contig2	156983	157852	-	ROBA	1-870/870	===============	0/0	100	99.19	megares	MEG_6082	Multi-compound:Drug_and_biocide_and_metal_resistance:Drug_and_biocide_and_metal_RND_efflux_pumps:ROBA
E_coli_7.fasta	contig20	33968	34441	+	DFRA	1-474/474	===============	0/0	100	100	megares	MEG_2547	Drugs:Trimethoprim:Dihydrofolate_reductase:DFRA
E_coli_7.fasta	contig20	34572	35360	+	ANT3-DPRIME	1-789/789	===============	0/0	100	100	megares	MEG_928	Drugs:Aminoglycosides:Aminoglycoside_O-nucleotidyltransferases:ANT3-DPRIME
E_coli_7.fasta	contig20	35906	36873	+	SULI	1-968/968	===============	0/0	100	100	megares	MEG_6615	Drugs:Sulfonamides:Sulfonamide-resistant_dihydropteroate_synthases:SULI
E_coli_7.fasta	contig20	42041	42962	-	MPHA	1-921/921	========/======	44562	100	99.67	megares	MEG_4030	Drugs:MLS:Macrolide_phosphotransferases:MPHA
E_coli_7.fasta	contig24	182	1486	-	PBP4B	1-1305/1305	===============	0/0	100	99.23	megares	MEG_5409	Drugs:betalactams:Penicillin_binding_protein:PBP4B
E_coli_7.fasta	contig25	174	958	+	AAC3	1-786/786	========/======	44562	99.87	99.75	megares	MEG_32	Drugs:Aminoglycosides:Aminoglycoside_N-acetyltransferases:AAC3
E_coli_7.fasta	contig25	1179	2204	+	APH4	1-1026/1026	===============	0/0	100	100	megares	MEG_1082	Drugs:Aminoglycosides:Aminoglycoside_O-phosphotransferases:APH4
E_coli_7.fasta	contig25	7051	7866	+	SULII	1-816/816	===============	0/0	100	100	megares	MEG_6617	Drugs:Sulfonamides:Sulfonamide-resistant_dihydropteroate_synthases:SULII
E_coli_7.fasta	contig28	729	1632	+	CTX	1-904/904	===============	0/0	100	99.67	megares	MEG_2401	Drugs:betalactams:Class_A_betalactamases:CTX
E_coli_7.fasta	contig28	1661	2603	+	CTX	1-943/943	===============	0/0	100	100	megares	MEG_2435	Drugs:betalactams:Class_A_betalactamases:CTX
E_coli_7.fasta	contig29	1020	2234	+	FLOR	1-1215/1215	===============	0/0	100	100	megares	MEG_2925	Drugs:Phenicol:Phenicol_resistance_MFS_efflux_pumps:FLOR
E_coli_7.fasta	contig3	8286	8958	+	KDPE	1-673/678	===============	0/0	99.26	97.18	megares	MEG_3448	Drugs:Aminoglycosides:Aminoglycoside_efflux_pumps:KDPE
E_coli_7.fasta	contig3	60747	62648	+	PBP2	1-1902/1902	===============	0/0	100	99.21	megares	MEG_5400	Drugs:betalactams:Penicillin_binding_protein:PBP2
E_coli_7.fasta	contig3	213345	214538	+	ACRA	1-1194/1194	===============	0/0	100	99.75	megares	MEG_399	Multi-compound:Drug_and_biocide_resistance:Drug_and_biocide_RND_efflux_pumps:ACRA
E_coli_7.fasta	contig3	214561	217710	+	ACRB	1-3150/3150	===============	0/0	100	99.08	megares	MEG_401	Multi-compound:Drug_and_biocide_resistance:Drug_and_biocide_RND_efflux_pumps:ACRB
E_coli_7.fasta	contig3	302584	303741	+	AMPH	1-1158/1158	===============	0/0	100	98.7	megares	MEG_729	Drugs:betalactams:Penicillin_binding_protein:AMPH
E_coli_7.fasta	contig32	252	1497	-	TEM	1-1246/1268	===============	0/0	98.26	99.36	megares	MEG_6875	Drugs:betalactams:Class_A_betalactamases:TEM
E_coli_7.fasta	contig4	57255	57887	+	CRP	1-633/633	===============	0/0	100	99.21	megares	MEG_2132	Multi-compound:Drug_and_biocide_resistance:Drug_and_biocide_RND_efflux_regulator:CRP
E_coli_7.fasta	contig4	232948	234105	+	MDTE	1-1158/1158	===============	0/0	100	99.74	megares	MEG_3751	Multi-compound:Drug_and_biocide_resistance:Drug_and_biocide_RND_efflux_pumps:MDTE
E_coli_7.fasta	contig4	234130	237243	+	MDTF	1-3114/3114	===============	0/0	100	98.52	megares	MEG_3752	Multi-compound:Drug_and_biocide_resistance:Drug_and_biocide_RND_efflux_pumps:MDTF
E_coli_7.fasta	contig4	237606	238334	-	GADW	1-729/729	===============	0/0	100	98.63	megares	MEG_3081	Multi-compound:Drug_and_biocide_resistance:Drug_and_biocide_RND_efflux_regulator:GADW
E_coli_7.fasta	contig4	238702	239526	-	GADX	1-825/825	===============	0/0	100	97.94	megares	MEG_3083	Multi-compound:Drug_and_biocide_resistance:Drug_and_biocide_RND_efflux_regulator:GADX
E_coli_7.fasta	contig5	204715	205128	+	HNS	1-414/414	===============	0/0	100	99.28	megares	MEG_3271	Drugs:Multi-drug_resistance:Multi-drug_RND_efflux_pumps:HNS
E_coli_7.fasta	contig6	92308	93441	+	BLAEC	1-1134/1134	===============	0/0	100	98.15	megares	MEG_1279	Drugs:betalactams:Class_C_betalactamases:BLAEC
E_coli_7.fasta	contig6	135647	137290	+	EPTA	1-1644/1644	===============	0/0	100	99.39	megares	MEG_2739	Drugs:Cationic_antimicrobial_peptides:Lipid_A_modification:EPTA
E_coli_7.fasta	contig6	159991	161022	+	MDTN	1-1032/1032	===============	0/0	100	97.58	megares	MEG_3763	Multi-compound:Drug_and_biocide_resistance:Drug_and_biocide_RND_efflux_pumps:MDTN
E_coli_7.fasta	contig6	161022	163073	+	MDTO	1-2052/2052	===============	0/0	100	98.29	megares	MEG_3764	Multi-compound:Drug_and_biocide_resistance:Drug_and_biocide_RND_efflux_pumps:MDTO
E_coli_7.fasta	contig6	163070	164536	+	MDTP	1-1467/1467	===============	0/0	100	98.23	megares	MEG_3765	Multi-compound:Drug_and_biocide_resistance:Drug_and_biocide_RND_efflux_pumps:MDTP
E_coli_7.fasta	contig6	186151	186474	+	SOXS	1-324/324	===============	0/0	100	99.69	megares	MEG_6551	Multi-compound:Drug_and_biocide_and_metal_resistance:Drug_and_biocide_and_metal_resistance_regulator:SOXS
E_coli_7.fasta	contig8	58418	58948	+	EMRR	1-531/531	===============	0/0	100	100	megares	MEG_2734	Multi-compound:Drug_and_biocide_resistance:Drug_and_biocide_MFS_efflux_regulator:EMRR
E_coli_7.fasta	contig8	59075	60247	+	EMRA	1-1173/1173	===============	0/0	100	98.3	megares	MEG_2722	Multi-compound:Drug_and_biocide_resistance:Drug_and_biocide_MFS_efflux_pumps:EMRA
E_coli_7.fasta	contig8	60264	61802	+	EMRB	1-1539/1539	===============	0/0	100	99.09	megares	MEG_2725	Multi-compound:Drug_and_biocide_resistance:Drug_and_biocide_MFS_efflux_pumps:EMRB
E_coli_7.fasta	contig9	130927	132117	+	EMRD	1-1191/1191	===============	0/0	100	99.92	megares	MEG_2729	Multi-compound:Drug_and_biocide_resistance:Drug_and_biocide_MFS_efflux_pumps:EMRD

## Sheet: Pseudomonase_1
#FILE	SEQUENCE	START	END	STRAND	GENE	COVERAGE	COVERAGE_MAP	GAPS	%COVERAGE	%IDENTITY	DATABASE	ACCESSION	PRODUCT	RESISTANCE
Pseudomonase_1.fasta	contig1	37920	39086	-	UGD	1-1167/1167	===============	0/0	100	96.92	megares	MEG_7328	Drugs:Cationic_antimicrobial_peptides:Lipid_A_modification:UGD
Pseudomonase_1.fasta	contig1	78646	80498	-	ASMA	1-1853/1854	===============	0/0	99.95	97.3	megares	MEG_1180	Drugs:Multi-drug_resistance:Multi-drug_RND_efflux_regulator:ASMA
Pseudomonase_1.fasta	contig1	92161	93408	+	MDTA	1-1248/1248	===============	0/0	100	95.59	megares	MEG_3746	Multi-compound:Drug_and_biocide_and_metal_resistance:Drug_and_biocide_and_metal_RND_efflux_pumps:MDTA
Pseudomonase_1.fasta	contig1	93408	96530	+	MDTB	1-3123/3123	===============	0/0	100	96.32	megares	MEG_3747	Multi-compound:Drug_and_biocide_and_metal_resistance:Drug_and_biocide_and_metal_RND_efflux_pumps:MDTB
Pseudomonase_1.fasta	contig1	96531	99608	+	MDTC	1-3078/3078	===============	0/0	100	93.96	megares	MEG_3749	Multi-compound:Drug_and_biocide_and_metal_resistance:Drug_and_biocide_and_metal_RND_efflux_pumps:MDTC
Pseudomonase_1.fasta	contig1	101021	102424	+	BAES	1-1404/1404	===============	0/0	100	90.74	megares	MEG_1193	Multi-compound:Drug_and_biocide_and_metal_resistance:Drug_and_biocide_and_metal_RND_efflux_regulator:BAES
Pseudomonase_1.fasta	contig1	102421	103142	+	BAER	1-722/723	===============	0/0	99.86	96.81	megares	MEG_1192	Multi-compound:Drug_and_biocide_and_metal_resistance:Drug_and_biocide_and_metal_RND_efflux_regulator:BAER
Pseudomonase_1.fasta	contig1	220440	221630	-	BCR	1-1191/1191	===============	0/0	100	96.72	megares	MEG_1210	Multi-compound:Drug_and_biocide_resistance:Drug_and_biocide_MFS_efflux_pumps:BCR
Pseudomonase_1.fasta	contig1	245020	246663	-	YOGI	1-1644/1644	===============	0/0	100	97.99	megares	MEG_7842	Multi-compound:Drug_and_biocide_resistance:Drug_and_biocide_ABC_efflux_pumps:YOGI
Pseudomonase_1.fasta	contig1	249694	250797	-	KPNO	1-1098/1098	========/======	44766	99.18	81.67	megares	MEG_3516	Multi-compound:Drug_and_biocide_resistance:Drug_and_biocide_SMR_efflux_pumps:KPNO
Pseudomonase_1.fasta	contig1	304879	305847	+	PMRF	1-969/969	===============	0/0	100	97.63	megares	MEG_5801	Drugs:Cationic_antimicrobial_peptides:Lipid_A_modification:PMRF
Pseudomonase_1.fasta	contig1	405059	406597	-	EMRY	1-1539/1539	===============	0/0	100	97.73	megares	MEG_2736	Multi-compound:Drug_and_biocide_resistance:Drug_and_biocide_MFS_efflux_pumps:EMRY
Pseudomonase_1.fasta	contig1	406597	407760	-	EMRK	1-1164/1164	===============	0/0	100	97.25	megares	MEG_2732	Multi-compound:Drug_and_biocide_resistance:Drug_and_biocide_MFS_efflux_pumps:EMRK
Pseudomonase_1.fasta	contig1	408795	412388	+	EVGS	1-3594/3594	===============	0/0	100	97.16	megares	MEG_2869	Multi-compound:Drug_and_biocide_resistance:Drug_and_biocide_MFS_efflux_regulator:EVGS
Pseudomonase_1.fasta	contig1	500707	503820	+	ACRD	1-3114/3114	===============	0/0	100	98.52	megares	MEG_407	Multi-compound:Drug_and_biocide_and_metal_resistance:Drug_and_biocide_and_metal_RND_efflux_pumps:ACRD
Pseudomonase_1.fasta	contig1	589189	590655	-	MDTP	1-1467/1467	===============	0/0	100	97.82	megares	MEG_3765	Multi-compound:Drug_and_biocide_resistance:Drug_and_biocide_RND_efflux_pumps:MDTP
Pseudomonase_1.fasta	contig1	590652	592703	-	MDTO	1-2052/2052	===============	0/0	100	97.03	megares	MEG_3764	Multi-compound:Drug_and_biocide_resistance:Drug_and_biocide_RND_efflux_pumps:MDTO
Pseudomonase_1.fasta	contig1	592703	593734	-	MDTN	1-1032/1032	===============	0/0	100	97.87	megares	MEG_3763	Multi-compound:Drug_and_biocide_resistance:Drug_and_biocide_RND_efflux_pumps:MDTN
Pseudomonase_1.fasta	contig1	622950	624593	-	EPTA	1-1644/1644	===============	0/0	100	91.18	megares	MEG_2739	Drugs:Cationic_antimicrobial_peptides:Lipid_A_modification:EPTA
Pseudomonase_1.fasta	contig1	664879	666012	-	BLAEC	1-1134/1134	===============	0/0	100	99.82	megares	MEG_1275	Drugs:betalactams:Class_C_betalactamases:BLAEC
Pseudomonase_1.fasta	contig100	606	1421	+	SULII	1-816/816	===============	0/0	100	100	megares	MEG_6617	Drugs:Sulfonamides:Sulfonamide-resistant_dihydropteroate_synthases:SULII
Pseudomonase_1.fasta	contig100	1458	2285	+	APH3-DPRIME	1-828/828	===============	0/0	100	100	megares	MEG_1019	Drugs:Aminoglycosides:Aminoglycoside_O-phosphotransferases:APH3-DPRIME
Pseudomonase_1.fasta	contig100	2285	3121	+	APH6	1-837/837	===============	0/0	100	100	megares	MEG_1084	Drugs:Aminoglycosides:Aminoglycoside_O-phosphotransferases:APH6
Pseudomonase_1.fasta	contig103	165	1025	+	AAC3	1-861/861	===============	0/0	100	99.77	megares	MEG_44	Drugs:Aminoglycosides:Aminoglycoside_N-acetyltransferases:AAC3
Pseudomonase_1.fasta	contig106	902	1732	+	OXA	1-831/831	===============	0/0	100	100	megares	MEG_4980	Drugs:betalactams:Class_D_betalactamases:OXA
Pseudomonase_1.fasta	contig11	114895	115308	-	HNS	1-414/414	===============	0/0	100	99.28	megares	MEG_3271	Drugs:Multi-drug_resistance:Multi-drug_RND_efflux_pumps:HNS
Pseudomonase_1.fasta	contig12	84772	85956	-	EMRD	7-1191/1191	========/======	44594	99.41	80.02	megares	MEG_2729	Multi-compound:Drug_and_biocide_resistance:Drug_and_biocide_MFS_efflux_pumps:EMRD
Pseudomonase_1.fasta	contig13	235341	236210	+	ROBA	1-870/870	===============	0/0	100	97.13	megares	MEG_6082	Multi-compound:Drug_and_biocide_and_metal_resistance:Drug_and_biocide_and_metal_RND_efflux_pumps:ROBA
Pseudomonase_1.fasta	contig14	82040	83230	-	EMRD	1-1191/1191	===============	0/0	100	97.82	megares	MEG_2729	Multi-compound:Drug_and_biocide_resistance:Drug_and_biocide_MFS_efflux_pumps:EMRD
Pseudomonase_1.fasta	contig15	31225	32049	+	GADX	1-825/825	===============	0/0	100	93.94	megares	MEG_3083	Multi-compound:Drug_and_biocide_resistance:Drug_and_biocide_RND_efflux_regulator:GADX
Pseudomonase_1.fasta	contig15	32418	33146	+	GADW	1-729/729	===============	0/0	100	99.45	megares	MEG_3082	Multi-compound:Drug_and_biocide_resistance:Drug_and_biocide_RND_efflux_regulator:GADW
Pseudomonase_1.fasta	contig15	33509	36622	-	MDTF	1-3114/3114	===============	0/0	100	97.27	megares	MEG_3752	Multi-compound:Drug_and_biocide_resistance:Drug_and_biocide_RND_efflux_pumps:MDTF
Pseudomonase_1.fasta	contig15	36647	37804	-	MDTE	1-1158/1158	===============	0/0	100	98.62	megares	MEG_3751	Multi-compound:Drug_and_biocide_resistance:Drug_and_biocide_RND_efflux_pumps:MDTE
Pseudomonase_1.fasta	contig15	211587	212219	-	CRP	1-633/633	===============	0/0	100	99.21	megares	MEG_2132	Multi-compound:Drug_and_biocide_resistance:Drug_and_biocide_RND_efflux_regulator:CRP
Pseudomonase_1.fasta	contig17	50519	51151	+	CRP	1-633/633	===============	0/0	100	87.84	megares	MEG_2132	Multi-compound:Drug_and_biocide_resistance:Drug_and_biocide_RND_efflux_regulator:CRP
Pseudomonase_1.fasta	contig18	227477	229225	-	MSBA	1-1749/1749	===============	0/0	100	80.62	megares	MEG_4061	Drugs:Multi-drug_resistance:Multi-drug_ABC_efflux_pumps:MSBA
Pseudomonase_1.fasta	contig19	13995	14414	+	FOSA	1-420/420	===============	0/0	100	99.52	megares	MEG_2987	Drugs:Fosfomycin:Fosfomycin_thiol_transferases:FOSA
Pseudomonase_1.fasta	contig2	141788	142120	+	MVRC	1-333/333	===============	0/0	100	92.19	megares	MEG_4103	Multi-compound:Drug_and_biocide_resistance:Drug_and_biocide_SMR_efflux_pumps:MVRC
Pseudomonase_1.fasta	contig2	433008	434381	-	MDTK	1-1374/1374	===============	0/0	100	97.96	megares	MEG_3759	Multi-compound:Drug_and_biocide_resistance:Drug_and_biocide_MATE_efflux_pumps:MDTK
Pseudomonase_1.fasta	contig2	499864	500229	+	MDTJ	1-366/366	===============	0/0	100	98.36	megares	MEG_3757	Multi-compound:Drug_and_biocide_resistance:Drug_and_biocide_SMR_efflux_pumps:MDTJ
Pseudomonase_1.fasta	contig2	500216	500545	+	MDTI	1-330/330	===============	0/0	100	98.79	megares	MEG_3756	Multi-compound:Drug_and_biocide_resistance:Drug_and_biocide_SMR_efflux_pumps:MDTI
Pseudomonase_1.fasta	contig2	527906	528295	-	MARA	1-390/390	===============	0/0	100	97.69	megares	MEG_3662	Multi-compound:Drug_and_biocide_resistance:Drug_and_biocide_RND_efflux_regulator:MARA
Pseudomonase_1.fasta	contig2	528310	528744	-	MARR	1-435/435	===============	0/0	100	98.16	megares	MEG_3663	Multi-compound:Drug_and_biocide_resistance:Drug_and_biocide_RND_efflux_regulator:MARR
Pseudomonase_1.fasta	contig20	45838	47739	-	PBP2	1-1902/1902	===============	0/0	100	81.33	megares	MEG_5400	Drugs:betalactams:Penicillin_binding_protein:PBP2
Pseudomonase_1.fasta	contig21	10959	12116	-	AMPH	1-1158/1158	===============	0/0	100	97.41	megares	MEG_729	Drugs:betalactams:Penicillin_binding_protein:AMPH
Pseudomonase_1.fasta	contig21	96853	100002	-	ACRB	1-3150/3150	===============	0/0	100	98.6	megares	MEG_401	Multi-compound:Drug_and_biocide_resistance:Drug_and_biocide_RND_efflux_pumps:ACRB
Pseudomonase_1.fasta	contig21	100025	101218	-	ACRA	1-1194/1194	===============	0/0	100	99.41	megares	MEG_399	Multi-compound:Drug_and_biocide_resistance:Drug_and_biocide_RND_efflux_pumps:ACRA
Pseudomonase_1.fasta	contig23	79984	80337	+	RAMA	21-375/375	========/======	44562	94.4	81.13	megares	MEG_6044	Drugs:Multi-drug_resistance:Multi-drug_RND_efflux_regulator:RAMA
Pseudomonase_1.fasta	contig26	65619	66851	-	KDEA	1-1233/1233	===============	0/0	100	99.51	megares	MEG_3447	Multi-compound:Drug_and_biocide_resistance:Drug_and_biocide_MFS_efflux_pumps:KDEA
Pseudomonase_1.fasta	contig27	56570	57937	-	CPXAR	1-1368/1374	===============	0/0	99.56	98.98	megares	MEG_2121	Multi-compound:Drug_and_biocide_resistance:Drug_and_biocide_RND_efflux_regulator:CPXAR
Pseudomonase_1.fasta	contig27	57934	58632	-	CPXAR	1-699/699	===============	0/0	100	97.85	megares	MEG_2118	Multi-compound:Drug_and_biocide_resistance:Drug_and_biocide_RND_efflux_regulator:CPXAR
Pseudomonase_1.fasta	contig29	49774	51312	-	EMRB	1-1539/1539	===============	0/0	100	98.05	megares	MEG_2725	Multi-compound:Drug_and_biocide_resistance:Drug_and_biocide_MFS_efflux_pumps:EMRB
Pseudomonase_1.fasta	contig29	51329	52501	-	EMRA	1-1173/1173	===============	0/0	100	98.04	megares	MEG_2722	Multi-compound:Drug_and_biocide_resistance:Drug_and_biocide_MFS_efflux_pumps:EMRA
Pseudomonase_1.fasta	contig29	52628	53158	-	EMRR	1-531/531	===============	0/0	100	98.68	megares	MEG_2734	Multi-compound:Drug_and_biocide_resistance:Drug_and_biocide_MFS_efflux_regulator:EMRR
Pseudomonase_1.fasta	contig3	71460	71864	-	HNS	1-405/414	===============	0/0	97.83	87.16	megares	MEG_3271	Drugs:Multi-drug_resistance:Multi-drug_RND_efflux_pumps:HNS
Pseudomonase_1.fasta	contig3	411987	413486	+	KMRA	1-1500/1500	===============	0/0	100	99.33	megares	MEG_3460	Multi-compound:Drug_and_biocide_resistance:Drug_and_biocide_MFS_efflux_pumps:KMRA
Pseudomonase_1.fasta	contig31	55875	57248	-	CPXAR	1-1374/1374	===============	0/0	100	99.49	megares	MEG_2115	Multi-compound:Drug_and_biocide_resistance:Drug_and_biocide_RND_efflux_regulator:CPXAR
Pseudomonase_1.fasta	contig31	57245	57943	-	CPXAR	1-699/699	===============	0/0	100	99.86	megares	MEG_2116	Multi-compound:Drug_and_biocide_resistance:Drug_and_biocide_RND_efflux_regulator:CPXAR
Pseudomonase_1.fasta	contig32	19817	20139	+	SOXS	1-323/324	===============	0/0	99.69	98.14	megares	MEG_6551	Multi-compound:Drug_and_biocide_and_metal_resistance:Drug_and_biocide_and_metal_resistance_regulator:SOXS
Pseudomonase_1.fasta	contig34	20130	20443	+	SOXS	1-314/324	===============	0/0	96.91	82.17	megares	MEG_6551	Multi-compound:Drug_and_biocide_and_metal_resistance:Drug_and_biocide_and_metal_resistance_regulator:SOXS
Pseudomonase_1.fasta	contig37	69697	71163	+	PHOR	1-1467/1467	===============	0/0	100	99.86	megares	MEG_5786	Multi-compound:Drug_and_biocide_resistance:Drug_and_biocide_SMR_efflux_regulator:PHOR
Pseudomonase_1.fasta	contig4	22143	23351	+	MDTH	1-1209/1209	===============	0/0	100	98.26	megares	MEG_3755	Multi-compound:Drug_and_biocide_resistance:Drug_and_biocide_MFS_efflux_pumps:MDTH
Pseudomonase_1.fasta	contig4	31982	33208	+	MDTG	1-1227/1227	===============	0/0	100	98.45	megares	MEG_3753	Multi-compound:Drug_and_biocide_resistance:Drug_and_biocide_MFS_efflux_pumps:MDTG
Pseudomonase_1.fasta	contig4	157989	159737	-	MSBA	1-1749/1749	===============	0/0	100	97.94	megares	MEG_4061	Drugs:Multi-drug_resistance:Multi-drug_ABC_efflux_pumps:MSBA
Pseudomonase_1.fasta	contig4	248728	249960	-	MDFA	1-1233/1233	===============	0/0	100	97.89	megares	MEG_3737	Multi-compound:Drug_and_biocide_resistance:Drug_and_biocide_MFS_efflux_pumps:MDFA
Pseudomonase_1.fasta	contig4	392501	393173	+	KDPE	1-673/678	===============	0/0	99.26	95.84	megares	MEG_3448	Drugs:Aminoglycosides:Aminoglycoside_efflux_pumps:KDPE
Pseudomonase_1.fasta	contig4	446160	448061	+	PBP2	1-1902/1902	===============	0/0	100	98.27	megares	MEG_5400	Drugs:betalactams:Penicillin_binding_protein:PBP2
Pseudomonase_1.fasta	contig41	7152	8975	+	ASMA	1-1824/1824	===============	0/0	100	99.51	megares	MEG_1179	Drugs:Multi-drug_resistance:Multi-drug_RND_efflux_regulator:ASMA
Pseudomonase_1.fasta	contig43	9445	10387	-	CTX	1-943/943	===============	0/0	100	95.55	megares	MEG_2435	Drugs:betalactams:Class_A_betalactamases:CTX
Pseudomonase_1.fasta	contig43	43922	44861	-	CTX	1-941/943	========/======	44562	99.68	86.19	megares	MEG_2435	Drugs:betalactams:Class_A_betalactamases:CTX
Pseudomonase_1.fasta	contig44	3575	6697	+	MDTB	1-3123/3123	========/======	44596	99.94	81.31	megares	MEG_3747	Multi-compound:Drug_and_biocide_and_metal_resistance:Drug_and_biocide_and_metal_RND_efflux_pumps:MDTB
Pseudomonase_1.fasta	contig44	6698	9775	+	MDTC	1-3078/3078	===============	0/0	100	81.64	megares	MEG_3749	Multi-compound:Drug_and_biocide_and_metal_resistance:Drug_and_biocide_and_metal_RND_efflux_pumps:MDTC
Pseudomonase_1.fasta	contig44	12664	13376	+	BAER	1-713/723	===============	0/0	98.62	81.63	megares	MEG_1192	Multi-compound:Drug_and_biocide_and_metal_resistance:Drug_and_biocide_and_metal_RND_efflux_regulator:BAER
Pseudomonase_1.fasta	contig5	314074	315612	-	EMRB	1-1539/1539	========/======	44594	99.94	84.55	megares	MEG_2725	Multi-compound:Drug_and_biocide_resistance:Drug_and_biocide_MFS_efflux_pumps:EMRB
Pseudomonase_1.fasta	contig5	315628	316800	-	KPN	1-1173/1173	===============	0/0	100	99.23	megares	MEG_3512	Multi-compound:Drug_and_biocide_resistance:Drug_and_biocide_MFS_efflux_pumps:KPN
Pseudomonase_1.fasta	contig5	316947	317456	-	EMRR	1-510/531	===============	0/0	96.05	83.14	megares	MEG_2734	Multi-compound:Drug_and_biocide_resistance:Drug_and_biocide_MFS_efflux_regulator:EMRR
Pseudomonase_1.fasta	contig5	361730	364882	-	OQXB	1-3153/3153	===============	0/0	100	99.46	megares	MEG_4361	Multi-compound:Drug_and_biocide_resistance:Drug_and_biocide_RND_efflux_pumps:OQXB
Pseudomonase_1.fasta	contig5	364906	366081	-	OQXA	1-1176/1176	===============	0/0	100	99.75	megares	MEG_4333	Multi-compound:Drug_and_biocide_resistance:Drug_and_biocide_RND_efflux_pumps:OQXA
Pseudomonase_1.fasta	contig58	11039	11927	-	CTX	1-889/889	===============	0/0	100	96.51	megares	MEG_2430	Drugs:betalactams:Class_A_betalactamases:CTX
Pseudomonase_1.fasta	contig6	184062	185186	-	OMP37	1-1125/1125	===============	0/0	100	99.56	megares	MEG_4283	Drugs:betalactams:Mutant_porin_proteins:OMP37
Pseudomonase_1.fasta	contig6	321429	321791	+	KPNE	1-363/363	===============	0/0	100	99.45	megares	MEG_3514	Multi-compound:Drug_and_biocide_resistance:Drug_and_biocide_SMR_efflux_pumps:KPNE
Pseudomonase_1.fasta	contig6	321778	322107	+	KPNF	1-330/330	===============	0/0	100	100	megares	MEG_3515	Multi-compound:Drug_and_biocide_resistance:Drug_and_biocide_SMR_efflux_pumps:KPNF
Pseudomonase_1.fasta	contig6	362034	363037	-	SHV	1-1004/1007	===============	0/0	99.7	99.2	megares	MEG_6428	Drugs:betalactams:Class_A_betalactamases:SHV
Pseudomonase_1.fasta	contig6	383101	383473	-	MARA	3-375/390	===============	0/0	95.64	81.23	megares	MEG_3662	Multi-compound:Drug_and_biocide_resistance:Drug_and_biocide_RND_efflux_regulator:MARA
Pseudomonase_1.fasta	contig66	14482	15424	-	CTX	1-943/943	===============	0/0	100	93.42	megares	MEG_2435	Drugs:betalactams:Class_A_betalactamases:CTX
Pseudomonase_1.fasta	contig7	120841	123954	-	ACRD	1-3114/3114	========/======	44598	99.9	80.17	megares	MEG_407	Multi-compound:Drug_and_biocide_and_metal_resistance:Drug_and_biocide_and_metal_RND_efflux_pumps:ACRD
Pseudomonase_1.fasta	contig7	301699	302811	+	KPNO	1-1098/1098	========/======	44607	100	96.86	megares	MEG_3516	Multi-compound:Drug_and_biocide_resistance:Drug_and_biocide_SMR_efflux_pumps:KPNO
Pseudomonase_1.fasta	contig73	8397	9337	+	CTX	1-941/943	===============	0/0	99.79	87.57	megares	MEG_2435	Drugs:betalactams:Class_A_betalactamases:CTX
Pseudomonase_1.fasta	contig8	156559	157378	-	BACA	1-820/822	===============	0/0	99.76	97.68	megares	MEG_1189	Drugs:Bacitracin:Undecaprenyl_pyrophosphate_phosphatase:BACA
Pseudomonase_1.fasta	contig8	364295	364957	-	ACRS	1-663/663	===============	0/0	100	97.59	megares	MEG_415	Multi-compound:Drug_and_biocide_resistance:Drug_and_biocide_RND_efflux_regulator:ACRS
Pseudomonase_1.fasta	contig8	365356	366513	+	ACRE	1-1158/1158	===============	0/0	100	98.19	megares	MEG_408	Multi-compound:Drug_and_biocide_resistance:Drug_and_biocide_RND_efflux_pumps:ACRE
Pseudomonase_1.fasta	contig8	366525	369629	+	ACRF	1-3105/3105	===============	0/0	100	96.55	megares	MEG_409	Multi-compound:Drug_and_biocide_resistance:Drug_and_biocide_RND_efflux_pumps:ACRF
Pseudomonase_1.fasta	contig81	826	1299	+	DFRA	1-474/474	===============	0/0	100	100	megares	MEG_2547	Drugs:Trimethoprim:Dihydrofolate_reductase:DFRA
Pseudomonase_1.fasta	contig81	1430	2218	+	ANT3-DPRIME	1-789/789	===============	0/0	100	100	megares	MEG_928	Drugs:Aminoglycosides:Aminoglycoside_O-nucleotidyltransferases:ANT3-DPRIME
Pseudomonase_1.fasta	contig81	2764	3731	+	SULI	1-968/968	===============	0/0	100	100	megares	MEG_6615	Drugs:Sulfonamides:Sulfonamide-resistant_dihydropteroate_synthases:SULI
Pseudomonase_1.fasta	contig81	8899	9820	-	MPHA	1-921/921	========/======	44562	100	99.67	megares	MEG_4030	Drugs:MLS:Macrolide_phosphotransferases:MPHA
Pseudomonase_1.fasta	contig88	2638	3912	+	TETA	1-1275/1275	===============	0/0	100	100	megares	MEG_7024	Drugs:Tetracyclines:Tetracycline_resistance_MFS_efflux_pumps:TETA
Pseudomonase_1.fasta	contig89	2391	3685	-	CTX	192-1486/1486	.==============	0/0	87.15	99.69	megares	MEG_2421	Drugs:betalactams:Class_A_betalactamases:CTX
Pseudomonase_1.fasta	contig9	89745	90938	+	ACRA	1-1197/1197	========/======	44595	99.75	97.91	megares	MEG_400	Multi-compound:Drug_and_biocide_resistance:Drug_and_biocide_RND_efflux_pumps:ACRA
Pseudomonase_1.fasta	contig9	90961	94105	+	ACRB	1-3148/3150	========/======	44625	99.81	83.77	megares	MEG_401	Multi-compound:Drug_and_biocide_resistance:Drug_and_biocide_RND_efflux_pumps:ACRB
Pseudomonase_1.fasta	contig9	219711	220871	+	AMPH	1-1161/1161	===============	0/0	100	98.97	megares	MEG_730	Drugs:betalactams:Penicillin_binding_protein:AMPH

## Sheet: S_aureus_9
#FILE	SEQUENCE	START	END	STRAND	GENE	COVERAGE	COVERAGE_MAP	GAPS	%COVERAGE	%IDENTITY	DATABASE	ACCESSION	PRODUCT	RESISTANCE
S_aureus_9.fasta	contig1	26331	27686	-	ARLS	1-1356/1356	===============	0/0	100	99.85	megares	MEG_1118	Drugs:Multi-drug_resistance:MDR_regulator:ARLS
S_aureus_9.fasta	contig1	27683	28342	-	ARLR	1-660/660	===============	0/0	100	99.85	megares	MEG_1117	Drugs:Multi-drug_resistance:MDR_regulator:ARLR
S_aureus_9.fasta	contig1	66851	68242	-	NORB	1-1392/1392	===============	0/0	100	99.14	megares	MEG_4210	Multi-compound:Drug_and_biocide_resistance:Drug_and_biocide_MFS_efflux_pumps:NORB
S_aureus_9.fasta	contig1	384759	385559	-	APH3-PRIME	1-801/801	===============	0/0	100	99.38	megares	MEG_1060	Drugs:Aminoglycosides:Aminoglycoside_O-phosphotransferases:APH3-PRIME
S_aureus_9.fasta	contig11	59916	60356	-	MEPB	1-441/441	===============	0/0	100	89.34	megares	MEG_3835	Drugs:Multi-drug_resistance:Multi-drug_MATE_efflux_pump:MEPB
S_aureus_9.fasta	contig11	60460	61830	-	MEPA	1-1371/1371	===============	0/0	100	99.27	megares	MEG_3834	Multi-compound:Drug_and_biocide_resistance:Drug_and_biocide_MATE_efflux_pumps:MEPA
S_aureus_9.fasta	contig11	61922	62341	-	MEPR	1-420/420	===============	0/0	100	100	megares	MEG_3836	Multi-compound:Drug_and_biocide_resistance:Drug_and_biocide_MATE_efflux_regulator:MEPR
S_aureus_9.fasta	contig2	75269	76456	-	DHAP	1-1188/1188	===============	0/0	100	99.83	megares	MEG_2614	Drugs:Phenicol:Phenicol_resistance_MFS_efflux_pumps:DHAP
S_aureus_9.fasta	contig23	39070	40512	+	LMRS	1-1443/1443	===============	0/0	100	99.1	megares	MEG_3599	Multi-compound:Drug_and_biocide_resistance:Drug_and_biocide_MFS_efflux_pumps:LMRS
S_aureus_9.fasta	contig31	285	2042	-	BLAR	1-1758/1758	===============	0/0	100	92.95	megares	MEG_1302	Drugs:betalactams:Penicillin_binding_protein_regulator:BLAR
S_aureus_9.fasta	contig31	2107	2994	+	BLAZ	1-888/888	===============	0/0	100	100	megares	MEG_1411	Drugs:betalactams:Class_A_betalactamases:BLAZ
S_aureus_9.fasta	contig38	282	2291	+	MECA	1-2010/2010	===============	0/0	100	100	megares	MEG_3783	Drugs:betalactams:Penicillin_binding_protein:MECA
S_aureus_9.fasta	contig44	195	1639	-	AAC6-PRIME	1-1445/1445	===============	0/0	100	100	megares	MEG_364	Drugs:Aminoglycosides:Aminoglycoside_N-acetyltransferases:AAC6-PRIME
S_aureus_9.fasta	contig5	77828	79180	-	TET38	1-1353/1353	===============	0/0	100	99.93	megares	MEG_6983	Drugs:Tetracyclines:Tetracycline_resistance_MFS_efflux_pumps:TET38
S_aureus_9.fasta	contig8	4636	5079	+	AAC3	1-444/444	===============	0/0	100	98.65	megares	MEG_47	Drugs:Aminoglycosides:Aminoglycoside_N-acetyltransferases:AAC3
S_aureus_9.fasta	contig8	13102	13545	-	MGRA	1-444/444	===============	0/0	100	100	megares	MEG_3943	Drugs:Multi-drug_resistance:MDR_regulator:MGRA
S_aureus_9.fasta	contig8	21196	22362	+	NORA	1-1167/1167	===============	0/0	100	100	megares	MEG_4207	Multi-compound:Drug_and_biocide_resistance:Drug_and_biocide_MFS_efflux_pumps:NORA
S_aureus_9.fasta	contig9	88002	88479	+	RLMH	1-478/480	===============	0/0	99.58	98.12	megares	MEG_6058	Drugs:MLS:23S_rRNA_methyltransferases:RLMH
S_aureus_9.fasta	contig9	94828	95466	+	FUSC	1-639/639	===============	0/0	100	99.84	megares	MEG_3068	Drugs:Fusidic_acid:Ribosomal_zinc-binding_protein:FUSC

## Sheet: S_aureus_10
#FILE	SEQUENCE	START	END	STRAND	GENE	COVERAGE	COVERAGE_MAP	GAPS	%COVERAGE	%IDENTITY	DATABASE	ACCESSION	PRODUCT	RESISTANCE
S_aureus_10.fasta	contig1	642538	643704	-	NORA	1-1167/1167	===============	0/0	100	99.91	megares	MEG_4207	Multi-compound:Drug_and_biocide_resistance:Drug_and_biocide_MFS_efflux_pumps:NORA
S_aureus_10.fasta	contig1	651355	651798	+	MGRA	1-444/444	===============	0/0	100	100	megares	MEG_3943	Drugs:Multi-drug_resistance:MDR_regulator:MGRA
S_aureus_10.fasta	contig1	659827	660270	-	AAC3	1-444/444	===============	0/0	100	98.87	megares	MEG_47	Drugs:Aminoglycosides:Aminoglycoside_N-acetyltransferases:AAC3
S_aureus_10.fasta	contig13	7569	8456	-	BLAZ	1-888/888	===============	0/0	100	99.21	megares	MEG_1409	Drugs:betalactams:Class_A_betalactamases:BLAZ
S_aureus_10.fasta	contig13	8521	10278	+	BLAR	1-1758/1758	===============	0/0	100	97.27	megares	MEG_1299	Drugs:betalactams:Penicillin_binding_protein_regulator:BLAR
S_aureus_10.fasta	contig13	10268	10648	+	BLAI	1-381/381	===============	0/0	100	98.42	megares	MEG_1287	Drugs:betalactams:Penicillin_binding_protein_regulator:BLAI
S_aureus_10.fasta	contig2	77013	77453	-	MEPB	1-441/441	===============	0/0	100	91.16	megares	MEG_3835	Drugs:Multi-drug_resistance:Multi-drug_MATE_efflux_pump:MEPB
S_aureus_10.fasta	contig2	77557	78927	-	MEPA	1-1371/1371	===============	0/0	100	99.05	megares	MEG_3834	Multi-compound:Drug_and_biocide_resistance:Drug_and_biocide_MATE_efflux_pumps:MEPA
S_aureus_10.fasta	contig2	79019	79438	-	MEPR	1-420/420	===============	0/0	100	99.76	megares	MEG_3836	Multi-compound:Drug_and_biocide_resistance:Drug_and_biocide_MATE_efflux_regulator:MEPR
S_aureus_10.fasta	contig2	306162	307514	-	TET38	1-1353/1353	===============	0/0	100	100	megares	MEG_6982	Drugs:Tetracyclines:Tetracycline_resistance_MFS_efflux_pumps:TET38
S_aureus_10.fasta	contig2	388339	390348	+	MECA	1-2010/2010	===============	0/0	100	100	megares	MEG_3785	Drugs:betalactams:Penicillin_binding_protein:MECA
S_aureus_10.fasta	contig2	395806	396285	-	RLMH	1-480/480	===============	0/0	100	98.12	megares	MEG_6058	Drugs:MLS:23S_rRNA_methyltransferases:RLMH
S_aureus_10.fasta	contig2	717661	718848	+	DHAP	1-1188/1188	===============	0/0	100	99.66	megares	MEG_2614	Drugs:Phenicol:Phenicol_resistance_MFS_efflux_pumps:DHAP
S_aureus_10.fasta	contig3	10559	11914	-	ARLS	1-1356/1356	===============	0/0	100	99.93	megares	MEG_1118	Drugs:Multi-drug_resistance:MDR_regulator:ARLS
S_aureus_10.fasta	contig3	11911	12570	-	ARLR	1-660/660	===============	0/0	100	99.85	megares	MEG_1117	Drugs:Multi-drug_resistance:MDR_regulator:ARLR
S_aureus_10.fasta	contig3	59420	60811	-	NORB	1-1392/1392	===============	0/0	100	99.28	megares	MEG_4210	Multi-compound:Drug_and_biocide_resistance:Drug_and_biocide_MFS_efflux_pumps:NORB
S_aureus_10.fasta	contig4	1729	3171	-	LMRS	1-1443/1443	===============	0/0	100	99.17	megares	MEG_3599	Multi-compound:Drug_and_biocide_resistance:Drug_and_biocide_MFS_efflux_pumps:LMRS
S_aureus_10.fasta	contig4	145728	146146	+	FOSB	1-420/420	========/======	44562	99.76	99.05	megares	MEG_3009	Drugs:Fosfomycin:Fosfomycin_thiol_transferases:FOSB
S_aureus_10.fasta	contig5	78471	79271	-	APH3-PRIME	1-801/801	===============	0/0	100	100	megares	MEG_1060	Drugs:Aminoglycosides:Aminoglycoside_O-phosphotransferases:APH3-PRIME

## Sheet: S_aureus_12
#FILE	SEQUENCE	START	END	STRAND	GENE	COVERAGE	COVERAGE_MAP	GAPS	%COVERAGE	%IDENTITY	DATABASE	ACCESSION	PRODUCT	RESISTANCE
S_aureus_12.fasta	contig1	54207	54647	-	MEPB	1-441/441	===============	0/0	100	88.89	megares	MEG_3835	Drugs:Multi-drug_resistance:Multi-drug_MATE_efflux_pump:MEPB
S_aureus_12.fasta	contig1	54753	56123	-	MEPA	1-1371/1371	===============	0/0	100	98.47	megares	MEG_3834	Multi-compound:Drug_and_biocide_resistance:Drug_and_biocide_MATE_efflux_pumps:MEPA
S_aureus_12.fasta	contig1	56215	56634	-	MEPR	1-420/420	===============	0/0	100	99.05	megares	MEG_3836	Multi-compound:Drug_and_biocide_resistance:Drug_and_biocide_MATE_efflux_regulator:MEPR
S_aureus_12.fasta	contig1	281006	282358	-	TET38	1-1353/1353	===============	0/0	100	100	megares	MEG_6981	Drugs:Tetracyclines:Tetracycline_resistance_MFS_efflux_pumps:TET38
S_aureus_12.fasta	contig15	53075	54430	-	ARLS	1-1356/1356	===============	0/0	100	98.38	megares	MEG_1118	Drugs:Multi-drug_resistance:MDR_regulator:ARLS
S_aureus_12.fasta	contig15	54427	55086	-	ARLR	1-660/660	===============	0/0	100	100	megares	MEG_1114	Drugs:Multi-drug_resistance:MDR_regulator:ARLR
S_aureus_12.fasta	contig2	292011	292488	+	RLMH	1-478/480	===============	0/0	99.58	98.75	megares	MEG_6058	Drugs:MLS:23S_rRNA_methyltransferases:RLMH
S_aureus_12.fasta	contig2	305770	307779	-	MECA	1-2010/2010	===============	0/0	100	100	megares	MEG_3783	Drugs:betalactams:Penicillin_binding_protein:MECA
S_aureus_12.fasta	contig22	11403	12290	-	BLAZ	1-888/888	===============	0/0	100	99.66	megares	MEG_1408	Drugs:betalactams:Class_A_betalactamases:BLAZ
S_aureus_12.fasta	contig22	12355	14112	+	BLAR	1-1758/1758	===============	0/0	100	99.94	megares	MEG_1302	Drugs:betalactams:Penicillin_binding_protein_regulator:BLAR
S_aureus_12.fasta	contig22	14102	14482	+	BLAI	1-381/381	===============	0/0	100	100	megares	MEG_1287	Drugs:betalactams:Penicillin_binding_protein_regulator:BLAI
S_aureus_12.fasta	contig22	16287	17753	-	MSRA	1-1467/1467	===============	0/0	100	100	megares	MEG_4067	Drugs:MLS:MLS_resistance_ABC_efflux_pumps:MSRA
S_aureus_12.fasta	contig24	7683	8321	-	FUSC	1-639/639	===============	0/0	100	99.84	megares	MEG_3068	Drugs:Fusidic_acid:Ribosomal_zinc-binding_protein:FUSC
S_aureus_12.fasta	contig3	1685	3127	-	LMRS	1-1443/1443	===============	0/0	100	91.55	megares	MEG_3599	Multi-compound:Drug_and_biocide_resistance:Drug_and_biocide_MFS_efflux_pumps:LMRS
S_aureus_12.fasta	contig3	149639	150058	+	FOSB	1-420/420	===============	0/0	100	98.81	megares	MEG_3009	Drugs:Fosfomycin:Fosfomycin_thiol_transferases:FOSB
S_aureus_12.fasta	contig3	282268	283455	-	DHAP	1-1188/1188	===============	0/0	100	99.07	megares	MEG_2614	Drugs:Phenicol:Phenicol_resistance_MFS_efflux_pumps:DHAP
S_aureus_12.fasta	contig4	40856	42247	-	NORB	1-1392/1392	===============	0/0	100	98.28	megares	MEG_4210	Multi-compound:Drug_and_biocide_resistance:Drug_and_biocide_MFS_efflux_pumps:NORB
S_aureus_12.fasta	contig5	204430	205596	-	NORA	1-1167/1167	===============	0/0	100	91.69	megares	MEG_4209	Multi-compound:Drug_and_biocide_resistance:Drug_and_biocide_MFS_efflux_pumps:NORA
S_aureus_12.fasta	contig5	213249	213692	+	MGRA	1-444/444	===============	0/0	100	99.78	megares	MEG_3943	Drugs:Multi-drug_resistance:MDR_regulator:MGRA
S_aureus_12.fasta	contig5	221708	222151	-	AAC3	1-444/444	===============	0/0	100	100	megares	MEG_47	Drugs:Aminoglycosides:Aminoglycoside_N-acetyltransferases:AAC3
S_aureus_12.fasta	contig9	12793	13593	-	APH3-PRIME	1-801/801	===============	0/0	100	99.25	megares	MEG_1060	Drugs:Aminoglycosides:Aminoglycoside_O-phosphotransferases:APH3-PRIME

## Sheet: K_pneumoniae_3
#FILE	SEQUENCE	START	END	STRAND	GENE	COVERAGE	COVERAGE_MAP	GAPS	%COVERAGE	%IDENTITY	DATABASE	ACCESSION	PRODUCT	RESISTANCE
K_pneumoniae_3.fasta	contig1	95664	96824	-	AMPH	1-1161/1161	===============	0/0	100	99.4	megares	MEG_730	Drugs:betalactams:Penicillin_binding_protein:AMPH
K_pneumoniae_3.fasta	contig1	222451	225595	-	ACRB	1-3148/3150	========/======	44690	99.75	83.85	megares	MEG_401	Multi-compound:Drug_and_biocide_resistance:Drug_and_biocide_RND_efflux_pumps:ACRB
K_pneumoniae_3.fasta	contig1	225618	226811	-	ACRA	1-1197/1197	========/======	44595	99.75	97.83	megares	MEG_400	Multi-compound:Drug_and_biocide_resistance:Drug_and_biocide_RND_efflux_pumps:ACRA
K_pneumoniae_3.fasta	contig1	349772	350125	+	RAMA	21-375/375	========/======	44562	94.4	81.13	megares	MEG_6044	Drugs:Multi-drug_resistance:Multi-drug_RND_efflux_regulator:RAMA
K_pneumoniae_3.fasta	contig1	473053	474954	-	PBP2	1-1902/1902	===============	0/0	100	81.33	megares	MEG_5400	Drugs:betalactams:Penicillin_binding_protein:PBP2
K_pneumoniae_3.fasta	contig1	689860	691092	+	KDEA	1-1233/1233	===============	0/0	100	99.59	megares	MEG_3447	Multi-compound:Drug_and_biocide_resistance:Drug_and_biocide_MFS_efflux_pumps:KDEA
K_pneumoniae_3.fasta	contig1	770442	772190	+	MSBA	1-1749/1749	===============	0/0	100	80.56	megares	MEG_4061	Drugs:Multi-drug_resistance:Multi-drug_ABC_efflux_pumps:MSBA
K_pneumoniae_3.fasta	contig11	73711	74024	-	SOXS	1-314/324	===============	0/0	96.91	82.17	megares	MEG_6551	Multi-compound:Drug_and_biocide_and_metal_resistance:Drug_and_biocide_and_metal_resistance_regulator:SOXS
K_pneumoniae_3.fasta	contig13	55923	57296	-	CPXAR	1-1374/1374	===============	0/0	100	99.64	megares	MEG_2115	Multi-compound:Drug_and_biocide_resistance:Drug_and_biocide_RND_efflux_regulator:CPXAR
K_pneumoniae_3.fasta	contig13	57293	57991	-	CPXAR	1-699/699	===============	0/0	100	99.86	megares	MEG_2116	Multi-compound:Drug_and_biocide_resistance:Drug_and_biocide_RND_efflux_regulator:CPXAR
K_pneumoniae_3.fasta	contig18	6836	7778	-	CTX	1-943/943	===============	0/0	100	97.14	megares	MEG_2435	Drugs:betalactams:Class_A_betalactamases:CTX
K_pneumoniae_3.fasta	contig2	149671	150075	+	HNS	1-405/414	===============	0/0	97.83	87.16	megares	MEG_3271	Drugs:Multi-drug_resistance:Multi-drug_RND_efflux_pumps:HNS
K_pneumoniae_3.fasta	contig2	480192	482015	-	ASMA	1-1824/1824	===============	0/0	100	99.18	megares	MEG_1179	Drugs:Multi-drug_resistance:Multi-drug_RND_efflux_regulator:ASMA
K_pneumoniae_3.fasta	contig2	492890	496012	+	MDTB	1-3123/3123	========/======	44596	99.94	81.09	megares	MEG_3747	Multi-compound:Drug_and_biocide_and_metal_resistance:Drug_and_biocide_and_metal_RND_efflux_pumps:MDTB
K_pneumoniae_3.fasta	contig2	496013	499090	+	MDTC	1-3078/3078	===============	0/0	100	81.74	megares	MEG_3749	Multi-compound:Drug_and_biocide_and_metal_resistance:Drug_and_biocide_and_metal_RND_efflux_pumps:MDTC
K_pneumoniae_3.fasta	contig2	501979	502691	+	BAER	1-713/723	===============	0/0	98.62	81.49	megares	MEG_1192	Multi-compound:Drug_and_biocide_and_metal_resistance:Drug_and_biocide_and_metal_RND_efflux_regulator:BAER
K_pneumoniae_3.fasta	contig2	622012	623106	-	KPNO	1-1098/1098	========/======	44564	99.73	98.63	megares	MEG_3516	Multi-compound:Drug_and_biocide_resistance:Drug_and_biocide_SMR_efflux_pumps:KPNO
K_pneumoniae_3.fasta	contig2	831517	834630	+	ACRD	1-3114/3114	========/======	44598	99.9	80.11	megares	MEG_407	Multi-compound:Drug_and_biocide_and_metal_resistance:Drug_and_biocide_and_metal_RND_efflux_pumps:ACRD
K_pneumoniae_3.fasta	contig21	1566	2381	+	SULII	1-816/816	===============	0/0	100	100	megares	MEG_6617	Drugs:Sulfonamides:Sulfonamide-resistant_dihydropteroate_synthases:SULII
K_pneumoniae_3.fasta	contig21	2418	3245	+	APH3-DPRIME	1-828/828	===============	0/0	100	99.88	megares	MEG_1019	Drugs:Aminoglycosides:Aminoglycoside_O-phosphotransferases:APH3-DPRIME
K_pneumoniae_3.fasta	contig21	3245	4081	+	APH6	1-837/837	===============	0/0	100	100	megares	MEG_1084	Drugs:Aminoglycosides:Aminoglycoside_O-phosphotransferases:APH6
K_pneumoniae_3.fasta	contig21	8322	8978	-	QNRS	1-657/657	===============	0/0	100	100	megares	MEG_6020	Drugs:Fluoroquinolones:Quinolone_resistance_protein_Qnr:QNRS
K_pneumoniae_3.fasta	contig26	2388	3682	-	CTX	192-1486/1486	.==============	0/0	87.15	99.69	megares	MEG_2421	Drugs:betalactams:Class_A_betalactamases:CTX
K_pneumoniae_3.fasta	contig31	1763	2947	-	TETC	1-1185/1185	===============	0/0	100	99.92	megares	MEG_7061	Drugs:Tetracyclines:Tetracycline_resistance_MFS_efflux_pumps:TETC
K_pneumoniae_3.fasta	contig32	192	1113	+	MPHA	1-921/921	========/======	44562	100	99.67	megares	MEG_4030	Drugs:MLS:Macrolide_phosphotransferases:MPHA
K_pneumoniae_3.fasta	contig33	1121	1613	+	ARR	51-543/543	.==============	0/0	90.79	99.19	megares	MEG_1135	Drugs:Rifampin:Rifampin_ADP-ribosyltransferase_Arr:ARR
K_pneumoniae_3.fasta	contig33	1746	2219	+	DFRA	1-474/474	===============	0/0	100	100	megares	MEG_2554	Drugs:Trimethoprim:Dihydrofolate_reductase:DFRA
K_pneumoniae_3.fasta	contig33	2400	3245	+	ANT3-DPRIME	1-846/846	===============	0/0	100	100	megares	MEG_763	Drugs:Aminoglycosides:Aminoglycoside_O-nucleotidyltransferases:ANT3-DPRIME
K_pneumoniae_3.fasta	contig35	128	625	+	DFRA	1-498/498	===============	0/0	100	100	megares	MEG_2551	Drugs:Trimethoprim:Dihydrofolate_reductase:DFRA
K_pneumoniae_3.fasta	contig35	1023	1824	+	ANT3-DPRIME	18-819/819	===============	0/0	97.92	99.88	megares	MEG_975	Drugs:Aminoglycosides:Aminoglycoside_O-nucleotidyltransferases:ANT3-DPRIME
K_pneumoniae_3.fasta	contig38	453	1420	+	SULI	1-968/968	===============	0/0	100	100	megares	MEG_6615	Drugs:Sulfonamides:Sulfonamide-resistant_dihydropteroate_synthases:SULI
K_pneumoniae_3.fasta	contig4	79960	81144	-	EMRD	7-1191/1191	========/======	44594	99.41	80.1	megares	MEG_2729	Multi-compound:Drug_and_biocide_resistance:Drug_and_biocide_MFS_efflux_pumps:EMRD
K_pneumoniae_3.fasta	contig4	464770	465402	-	CRP	1-633/633	===============	0/0	100	88.15	megares	MEG_2132	Multi-compound:Drug_and_biocide_resistance:Drug_and_biocide_RND_efflux_regulator:CRP
K_pneumoniae_3.fasta	contig41	261	1076	-	APH3-PRIME	1-816/816	===============	0/0	100	100	megares	MEG_1079	Drugs:Aminoglycosides:Aminoglycoside_O-phosphotransferases:APH3-PRIME
K_pneumoniae_3.fasta	contig5	403458	404924	+	PHOR	1-1467/1467	===============	0/0	100	99.66	megares	MEG_5786	Multi-compound:Drug_and_biocide_resistance:Drug_and_biocide_SMR_efflux_regulator:PHOR
K_pneumoniae_3.fasta	contig6	346169	346588	-	FOSA	1-420/420	===============	0/0	100	99.05	megares	MEG_2987	Drugs:Fosfomycin:Fosfomycin_thiol_transferases:FOSA
K_pneumoniae_3.fasta	contig7	157949	159448	-	KMRA	1-1500/1500	===============	0/0	100	99.2	megares	MEG_3460	Multi-compound:Drug_and_biocide_resistance:Drug_and_biocide_MFS_efflux_pumps:KMRA
K_pneumoniae_3.fasta	contig8	97488	97860	+	MARA	3-375/390	===============	0/0	95.64	81.23	megares	MEG_3662	Multi-compound:Drug_and_biocide_resistance:Drug_and_biocide_RND_efflux_regulator:MARA
K_pneumoniae_3.fasta	contig8	117922	118925	+	SHV	1-1004/1007	===============	0/0	99.7	98.61	megares	MEG_6428	Drugs:betalactams:Class_A_betalactamases:SHV
K_pneumoniae_3.fasta	contig8	158871	159200	-	KPNF	1-330/330	===============	0/0	100	99.39	megares	MEG_3515	Multi-compound:Drug_and_biocide_resistance:Drug_and_biocide_SMR_efflux_pumps:KPNF
K_pneumoniae_3.fasta	contig8	159187	159549	-	KPNE	1-363/363	===============	0/0	100	100	megares	MEG_3514	Multi-compound:Drug_and_biocide_resistance:Drug_and_biocide_SMR_efflux_pumps:KPNE
K_pneumoniae_3.fasta	contig8	296038	297162	+	OMP37	1-1125/1125	===============	0/0	100	99.29	megares	MEG_4283	Drugs:betalactams:Mutant_porin_proteins:OMP37
K_pneumoniae_3.fasta	contig9	30754	31929	+	OQXA	1-1176/1176	===============	0/0	100	99.66	megares	MEG_4330	Multi-compound:Drug_and_biocide_resistance:Drug_and_biocide_RND_efflux_pumps:OQXA
K_pneumoniae_3.fasta	contig9	31953	35105	+	OQXB	1-3153/3153	===============	0/0	100	99.37	megares	MEG_4358	Multi-compound:Drug_and_biocide_resistance:Drug_and_biocide_RND_efflux_pumps:OQXB
K_pneumoniae_3.fasta	contig9	75166	75675	+	EMRR	1-510/531	===============	0/0	96.05	83.14	megares	MEG_2734	Multi-compound:Drug_and_biocide_resistance:Drug_and_biocide_MFS_efflux_regulator:EMRR
K_pneumoniae_3.fasta	contig9	75822	76994	+	KPN	1-1173/1173	===============	0/0	100	99.32	megares	MEG_3512	Multi-compound:Drug_and_biocide_resistance:Drug_and_biocide_MFS_efflux_pumps:KPN
K_pneumoniae_3.fasta	contig9	77010	78548	+	EMRB	1-1539/1539	========/======	44594	99.94	84.42	megares	MEG_2725	Multi-compound:Drug_and_biocide_resistance:Drug_and_biocide_MFS_efflux_pumps:EMRB

## Sheet: K_pneumoniae_6
#FILE	SEQUENCE	START	END	STRAND	GENE	COVERAGE	COVERAGE_MAP	GAPS	%COVERAGE	%IDENTITY	DATABASE	ACCESSION	PRODUCT	RESISTANCE
K_pneumoniae_6.fasta	contig1	75136	76602	+	PHOR	1-1467/1467	===============	0/0	100	99.8	megares	MEG_5786	Multi-compound:Drug_and_biocide_resistance:Drug_and_biocide_SMR_efflux_regulator:PHOR
K_pneumoniae_6.fasta	contig1	310037	311785	-	MSBA	1-1749/1749	===============	0/0	100	80.62	megares	MEG_4061	Drugs:Multi-drug_resistance:Multi-drug_ABC_efflux_pumps:MSBA
K_pneumoniae_6.fasta	contig1	391159	392391	-	KDEA	1-1233/1233	===============	0/0	100	99.51	megares	MEG_3447	Multi-compound:Drug_and_biocide_resistance:Drug_and_biocide_MFS_efflux_pumps:KDEA
K_pneumoniae_6.fasta	contig1	607027	608928	+	PBP2	1-1902/1902	===============	0/0	100	81.44	megares	MEG_5400	Drugs:betalactams:Penicillin_binding_protein:PBP2
K_pneumoniae_6.fasta	contig1	739615	739968	-	RAMA	21-375/375	========/======	44562	94.4	81.69	megares	MEG_6044	Drugs:Multi-drug_resistance:Multi-drug_RND_efflux_regulator:RAMA
K_pneumoniae_6.fasta	contig12	25308	25670	+	KPNE	1-363/363	===============	0/0	100	100	megares	MEG_3514	Multi-compound:Drug_and_biocide_resistance:Drug_and_biocide_SMR_efflux_pumps:KPNE
K_pneumoniae_6.fasta	contig12	25657	25986	+	KPNF	1-330/330	===============	0/0	100	99.09	megares	MEG_3515	Multi-compound:Drug_and_biocide_resistance:Drug_and_biocide_SMR_efflux_pumps:KPNF
K_pneumoniae_6.fasta	contig12	65920	66923	-	SHV	1-1004/1007	===============	0/0	99.7	98.51	megares	MEG_6428	Drugs:betalactams:Class_A_betalactamases:SHV
K_pneumoniae_6.fasta	contig12	86981	87353	-	MARA	3-375/390	===============	0/0	95.64	81.23	megares	MEG_3662	Multi-compound:Drug_and_biocide_resistance:Drug_and_biocide_RND_efflux_regulator:MARA
K_pneumoniae_6.fasta	contig13	138758	139165	+	HNS	1-405/414	========/======	44564	97.83	86.77	megares	MEG_3271	Drugs:Multi-drug_resistance:Multi-drug_RND_efflux_pumps:HNS
K_pneumoniae_6.fasta	contig14	38173	39297	-	OMP37	1-1125/1125	===============	0/0	100	99.73	megares	MEG_4283	Drugs:betalactams:Mutant_porin_proteins:OMP37
K_pneumoniae_6.fasta	contig15	70142	71082	-	CTX	1-941/943	===============	0/0	99.79	83.95	megares	MEG_2435	Drugs:betalactams:Class_A_betalactamases:CTX
K_pneumoniae_6.fasta	contig15	115169	116463	-	CTX	192-1486/1486	.==============	0/0	87.15	99.69	megares	MEG_2421	Drugs:betalactams:Class_A_betalactamases:CTX
K_pneumoniae_6.fasta	contig15	118870	120115	+	TEM	1-1246/1268	===============	0/0	98.26	99.52	megares	MEG_6875	Drugs:betalactams:Class_A_betalactamases:TEM
K_pneumoniae_6.fasta	contig16	89531	90163	-	CRP	1-633/633	===============	0/0	100	87.99	megares	MEG_2132	Multi-compound:Drug_and_biocide_resistance:Drug_and_biocide_RND_efflux_regulator:CRP
K_pneumoniae_6.fasta	contig17	50674	52047	-	CPXAR	1-1374/1374	===============	0/0	100	99.64	megares	MEG_2115	Multi-compound:Drug_and_biocide_resistance:Drug_and_biocide_RND_efflux_regulator:CPXAR
K_pneumoniae_6.fasta	contig17	52044	52742	-	CPXAR	1-699/699	===============	0/0	100	99.71	megares	MEG_2116	Multi-compound:Drug_and_biocide_resistance:Drug_and_biocide_RND_efflux_regulator:CPXAR
K_pneumoniae_6.fasta	contig2	251995	253818	-	ASMA	1-1824/1824	===============	0/0	100	98.9	megares	MEG_1179	Drugs:Multi-drug_resistance:Multi-drug_RND_efflux_regulator:ASMA
K_pneumoniae_6.fasta	contig2	264693	267815	+	MDTB	1-3123/3123	========/======	44596	99.94	81.34	megares	MEG_3747	Multi-compound:Drug_and_biocide_and_metal_resistance:Drug_and_biocide_and_metal_RND_efflux_pumps:MDTB
K_pneumoniae_6.fasta	contig2	267816	270893	+	MDTC	1-3078/3078	===============	0/0	100	81.87	megares	MEG_3749	Multi-compound:Drug_and_biocide_and_metal_resistance:Drug_and_biocide_and_metal_RND_efflux_pumps:MDTC
K_pneumoniae_6.fasta	contig2	273782	274494	+	BAER	1-713/723	===============	0/0	98.62	81.63	megares	MEG_1192	Multi-compound:Drug_and_biocide_and_metal_resistance:Drug_and_biocide_and_metal_RND_efflux_regulator:BAER
K_pneumoniae_6.fasta	contig2	393928	395031	-	KPNO	1-1098/1098	========/======	44567	100	99.37	megares	MEG_3516	Multi-compound:Drug_and_biocide_resistance:Drug_and_biocide_SMR_efflux_pumps:KPNO
K_pneumoniae_6.fasta	contig2	571249	574362	+	ACRD	1-3114/3114	========/======	44598	99.9	80.11	megares	MEG_407	Multi-compound:Drug_and_biocide_and_metal_resistance:Drug_and_biocide_and_metal_RND_efflux_pumps:ACRD
K_pneumoniae_6.fasta	contig20	12599	13541	+	CTX	1-943/943	===============	0/0	100	96.92	megares	MEG_2435	Drugs:betalactams:Class_A_betalactamases:CTX
K_pneumoniae_6.fasta	contig27	40789	41262	-	DFRA	1-474/474	===============	0/0	100	99.79	megares	MEG_2495	Drugs:Trimethoprim:Dihydrofolate_reductase:DFRA
K_pneumoniae_6.fasta	contig3	51381	52565	-	EMRD	7-1191/1191	========/======	44594	99.41	80.1	megares	MEG_2729	Multi-compound:Drug_and_biocide_resistance:Drug_and_biocide_MFS_efflux_pumps:EMRD
K_pneumoniae_6.fasta	contig3	344812	345125	+	SOXS	1-314/324	===============	0/0	96.91	82.17	megares	MEG_6551	Multi-compound:Drug_and_biocide_and_metal_resistance:Drug_and_biocide_and_metal_resistance_regulator:SOXS
K_pneumoniae_6.fasta	contig35	5140	5637	+	DFRA	1-498/498	===============	0/0	100	100	megares	MEG_2551	Drugs:Trimethoprim:Dihydrofolate_reductase:DFRA
K_pneumoniae_6.fasta	contig35	6035	6836	+	ANT3-DPRIME	18-819/819	===============	0/0	97.92	99.88	megares	MEG_975	Drugs:Aminoglycosides:Aminoglycoside_O-nucleotidyltransferases:ANT3-DPRIME
K_pneumoniae_6.fasta	contig35	7254	8180	+	SULI	1-927/927	===============	0/0	100	100	megares	MEG_6616	Drugs:Sulfonamides:Sulfonamide-resistant_dihydropteroate_synthases:SULI
K_pneumoniae_6.fasta	contig35	11525	12298	+	ARMA	1-774/774	===============	0/0	100	99.87	megares	MEG_1120	Drugs:Aminoglycosides:16S_rRNA_methyltransferases:ARMA
K_pneumoniae_6.fasta	contig35	14597	16072	+	MSRE	1-1476/1476	===============	0/0	100	100	megares	MEG_4075	Drugs:MLS:MLS_resistance_ABC_efflux_pumps:MSRE
K_pneumoniae_6.fasta	contig35	16128	17012	+	MPHE	1-885/885	===============	0/0	100	99.89	megares	MEG_4044	Drugs:MLS:Macrolide_phosphotransferases:MPHE
K_pneumoniae_6.fasta	contig39	9590	10420	+	OXA	1-831/831	===============	0/0	100	100	megares	MEG_4980	Drugs:betalactams:Class_D_betalactamases:OXA
K_pneumoniae_6.fasta	contig4	213210	214709	-	KMRA	1-1500/1500	===============	0/0	100	99.6	megares	MEG_3460	Multi-compound:Drug_and_biocide_resistance:Drug_and_biocide_MFS_efflux_pumps:KMRA
K_pneumoniae_6.fasta	contig5	277372	278909	-	EMRB	1-1538/1539	========/======	44594	99.87	84.34	megares	MEG_2725	Multi-compound:Drug_and_biocide_resistance:Drug_and_biocide_MFS_efflux_pumps:EMRB
K_pneumoniae_6.fasta	contig5	278925	280097	-	KPN	1-1173/1173	===============	0/0	100	99.32	megares	MEG_3512	Multi-compound:Drug_and_biocide_resistance:Drug_and_biocide_MFS_efflux_pumps:KPN
K_pneumoniae_6.fasta	contig5	280244	280753	-	EMRR	1-510/531	===============	0/0	96.05	83.14	megares	MEG_2734	Multi-compound:Drug_and_biocide_resistance:Drug_and_biocide_MFS_efflux_regulator:EMRR
K_pneumoniae_6.fasta	contig5	325025	328177	-	OQXB	1-3153/3153	===============	0/0	100	99.91	megares	MEG_4355	Multi-compound:Drug_and_biocide_resistance:Drug_and_biocide_RND_efflux_pumps:OQXB
K_pneumoniae_6.fasta	contig5	328201	329376	-	OQXA	1-1176/1176	===============	0/0	100	100	megares	MEG_4335	Multi-compound:Drug_and_biocide_resistance:Drug_and_biocide_RND_efflux_pumps:OQXA
K_pneumoniae_6.fasta	contig6	15516	15935	+	FOSA	1-420/420	===============	0/0	100	99.52	megares	MEG_2987	Drugs:Fosfomycin:Fosfomycin_thiol_transferases:FOSA
K_pneumoniae_6.fasta	contig7	568	1761	+	ACRA	1-1197/1197	========/======	44595	99.75	98.08	megares	MEG_400	Multi-compound:Drug_and_biocide_resistance:Drug_and_biocide_RND_efflux_pumps:ACRA
K_pneumoniae_6.fasta	contig7	1784	4928	+	ACRB	1-3148/3150	========/======	44690	99.75	83.85	megares	MEG_401	Multi-compound:Drug_and_biocide_resistance:Drug_and_biocide_RND_efflux_pumps:ACRB
K_pneumoniae_6.fasta	contig7	130512	131672	+	AMPH	1-1161/1161	===============	0/0	100	99.22	megares	MEG_730	Drugs:betalactams:Penicillin_binding_protein:AMPH

## Sheet: summary
#FILE	NUM_FOUND	AAC3	AAC6-PRIME	ACRA	ACRB	ACRD	ACRE	ACRF	ACRS	AMPH	ANT3-DPRIME	APH3-DPRIME	APH3-PRIME	APH4	APH6	ARLR	ARLS	ARMA	ARR	ASMA	BACA	BAER	BAES	BCR	BLAEC	BLAI	BLAR	BLAZ	CPXAR	CRP	CTX	DFRA	DHAP	EMRA	EMRB	EMRD	EMRK	EMRR	EMRY	EPTA	EVGS	FLOR	FOSA	FOSB	FUSC	GADW	GADX	HNS	KDEA
E_coli_7.tab	65	99.87	.	100	100	100	100	100	100	100	100	.	.	100	.	.	.	.	.	99.95	99.76	100	100	100	100	.	.	.	100.00;100.00	100	100.00;100.00	100	.	100	100	100	100	100	100	100	100	100	.	.	.	100	100	100	.
K_pneumoniae_3.tab	43	.	.	99.75	99.75	99.9	.	.	.	100	100.00;97.92	100	100	.	100	.	.	.	90.79	100	.	98.62	.	.	.	.	.	.	100.00;100.00	100	100.00;87.15	100.00;100.00	.	.	99.94	99.41	.	96.05	.	.	.	.	100	.	.	.	.	97.83	100
K_pneumoniae_6.tab	40	.	.	99.75	99.75	99.9	.	.	.	100	97.92	.	.	.	.	.	.	100	.	100	.	98.62	.	.	.	.	.	.	100.00;100.00	100	99.79;87.15;100.00	100.00;100.00	.	.	99.87	99.41	.	96.05	.	.	.	.	100	.	.	.	.	97.83	100
Pseudomonase_1.tab	75	100	.	100.00;99.75	100.00;99.81	100.00;99.90	100	100	100	100.00;100.00	100	100	.	.	100	.	.	.	.	99.95;100.00	99.76	99.86;98.62	100	100	100	.	.	.	99.56;100.00;100.00;100.00	100.00;100.00	100.00;99.68;100.00;100.00;99.79;87.15	100	.	100	100.00;99.94	99.41;100.00	100	100.00;96.05	100	100	100	.	100	.	.	100	100	100.00;97.83	100
S_aureus_10.tab	19	100	.	.	.	.	.	.	.	.	.	.	100	.	.	100	100	.	.	.	.	.	.	.	.	100	100	100	.	.	.	.	100	.	.	.	.	.	.	.	.	.	.	99.76	.	.	.	.	.
S_aureus_12.tab	21	100	.	.	.	.	.	.	.	.	.	.	100	.	.	100	100	.	.	.	.	.	.	.	.	100	100	100	.	.	.	.	100	.	.	.	.	.	.	.	.	.	.	100	100	.	.	.	.
S_aureus_9.tab	19	100	100	.	.	.	.	.	.	.	.	.	100	.	.	100	100	.	.	.	.	.	.	.	.	.	100	100	.	.	.	.	100	.	.	.	.	.	.	.	.	.	.	.	100	.	.	.	.
[truncated: 60 more columns]
